# Supplementary material for: Salinity Contributions from Geothermal Waters to the Rio Grande and Shallow Aquifer System in the Transboundary Mesilla (United States)/Conejos-Médanos (Mexico) Basin
Source: MDPI journal article supplement (doi:10.3390/w14010033), 2021-12-23

## Figure S1. Plots of all 379 temperature profiles.

### EXPLANATION

-  Estimated depth to water table
-  Measured temperature
-  Interpolated temperature
-  Linearity guide (connects shallowest and deepest measurements)

*Measurement date of 0001-01-01 corresponds to an unknown date of measurement.*

ID: 1 [A\_Well]

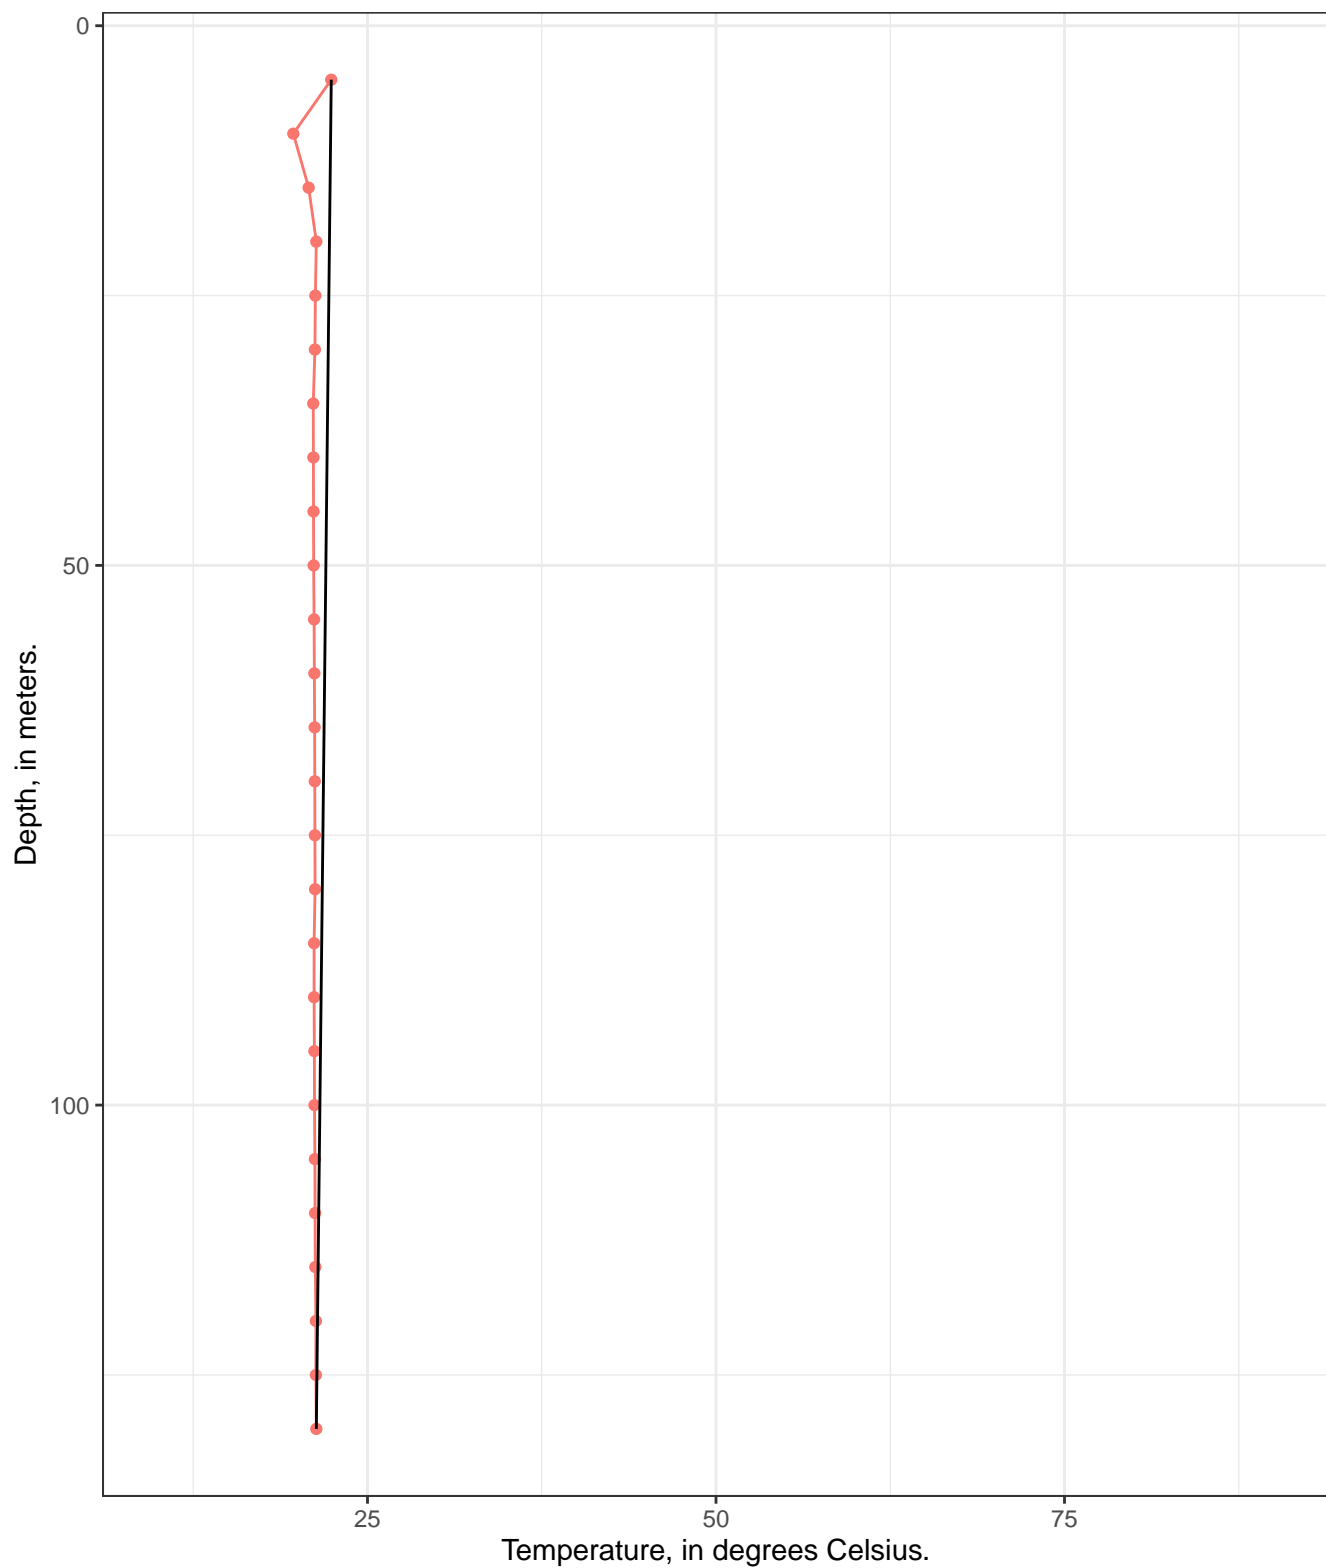

Measurement date 1980-01-01

ID: 2 [Aden\_Hills]

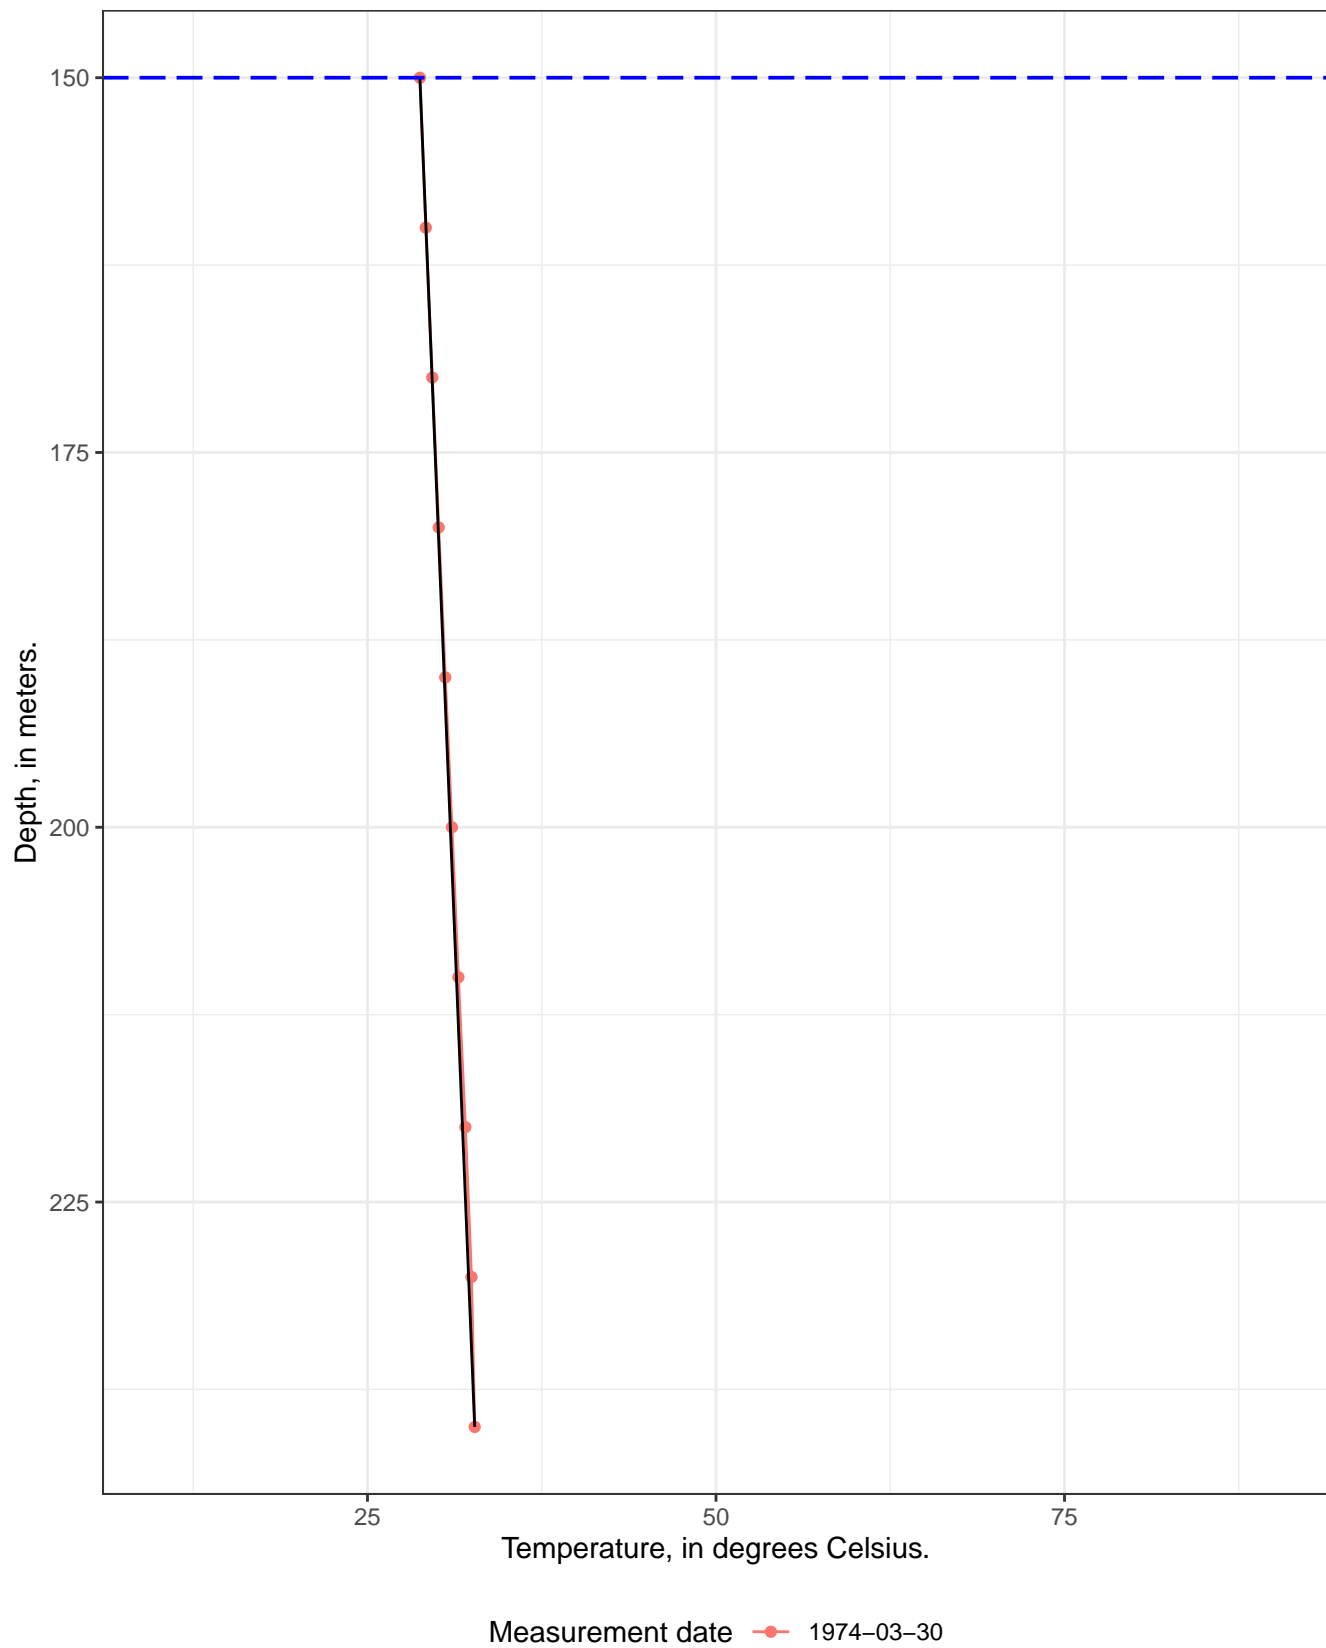

ID: 3 [Amax\_80-186]

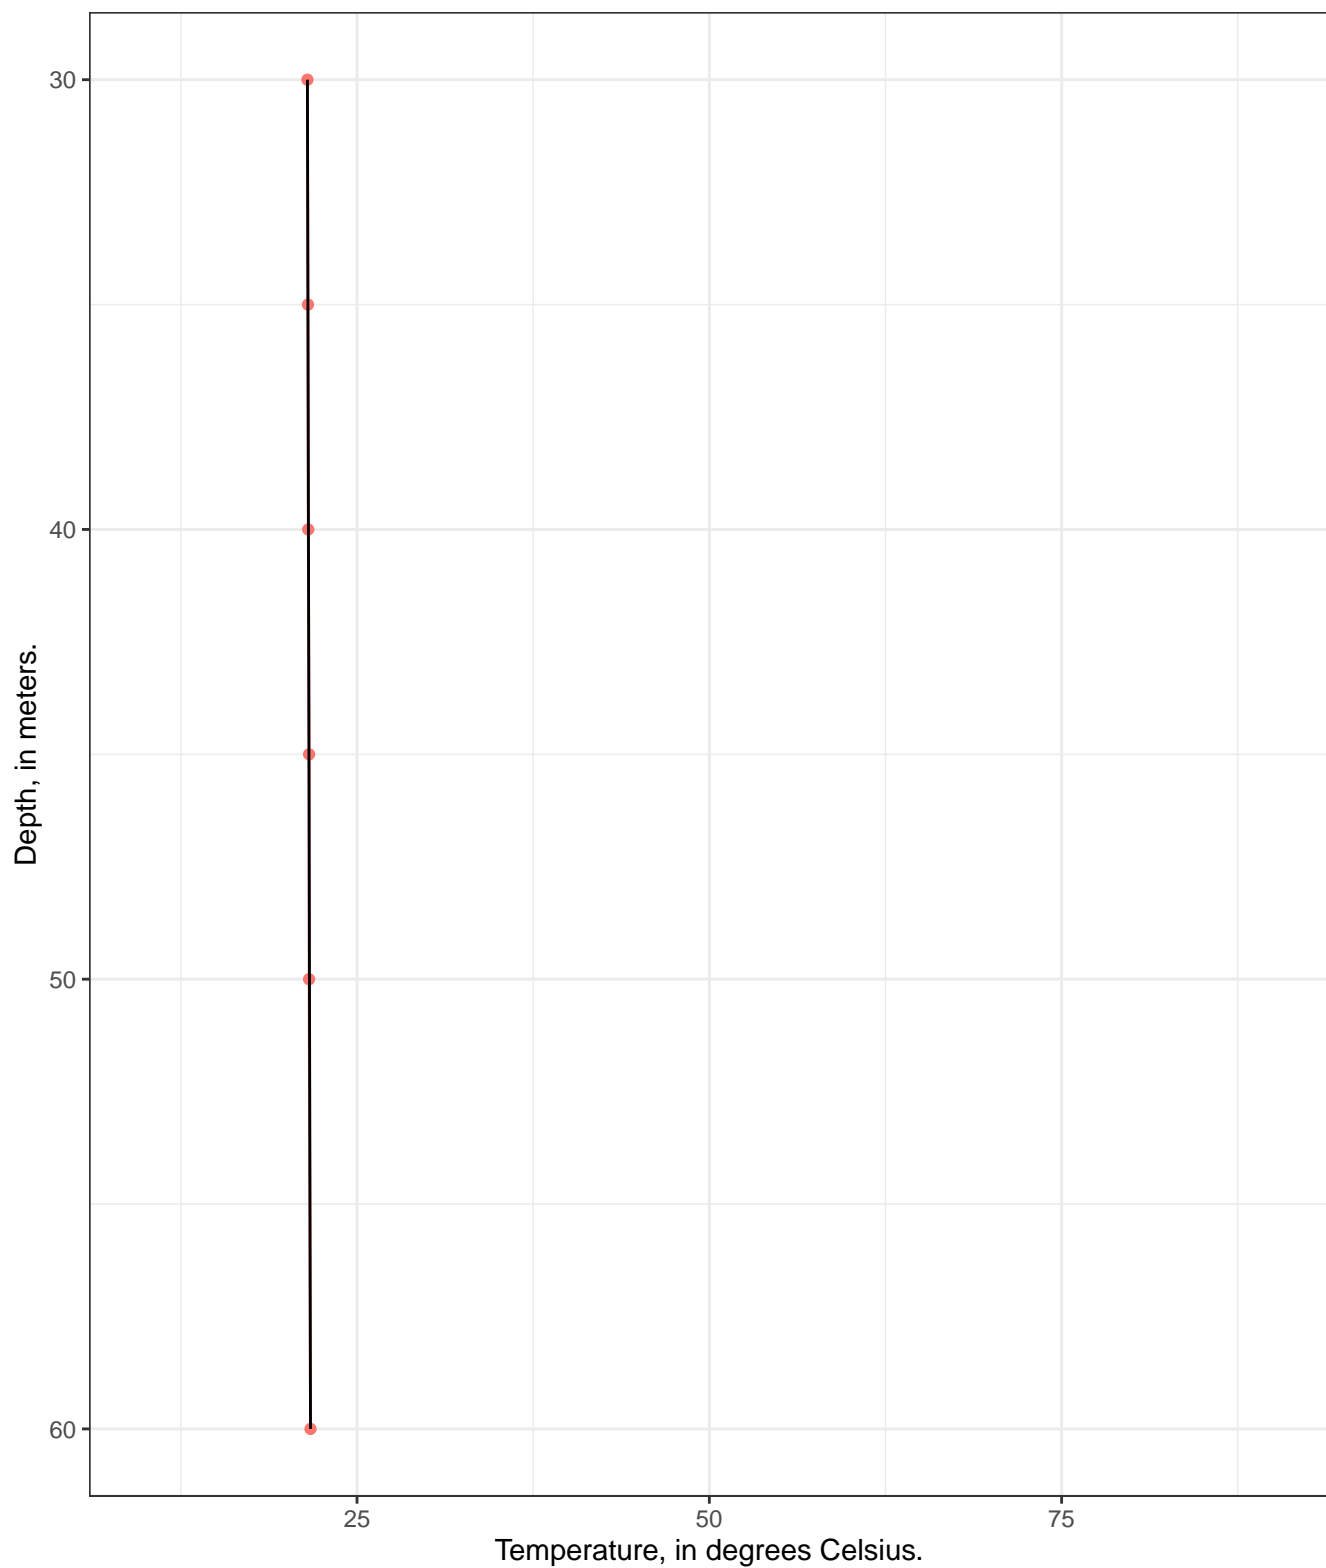

Measurement date 1980-07-24

ID: 4 [Amax\_80-187]

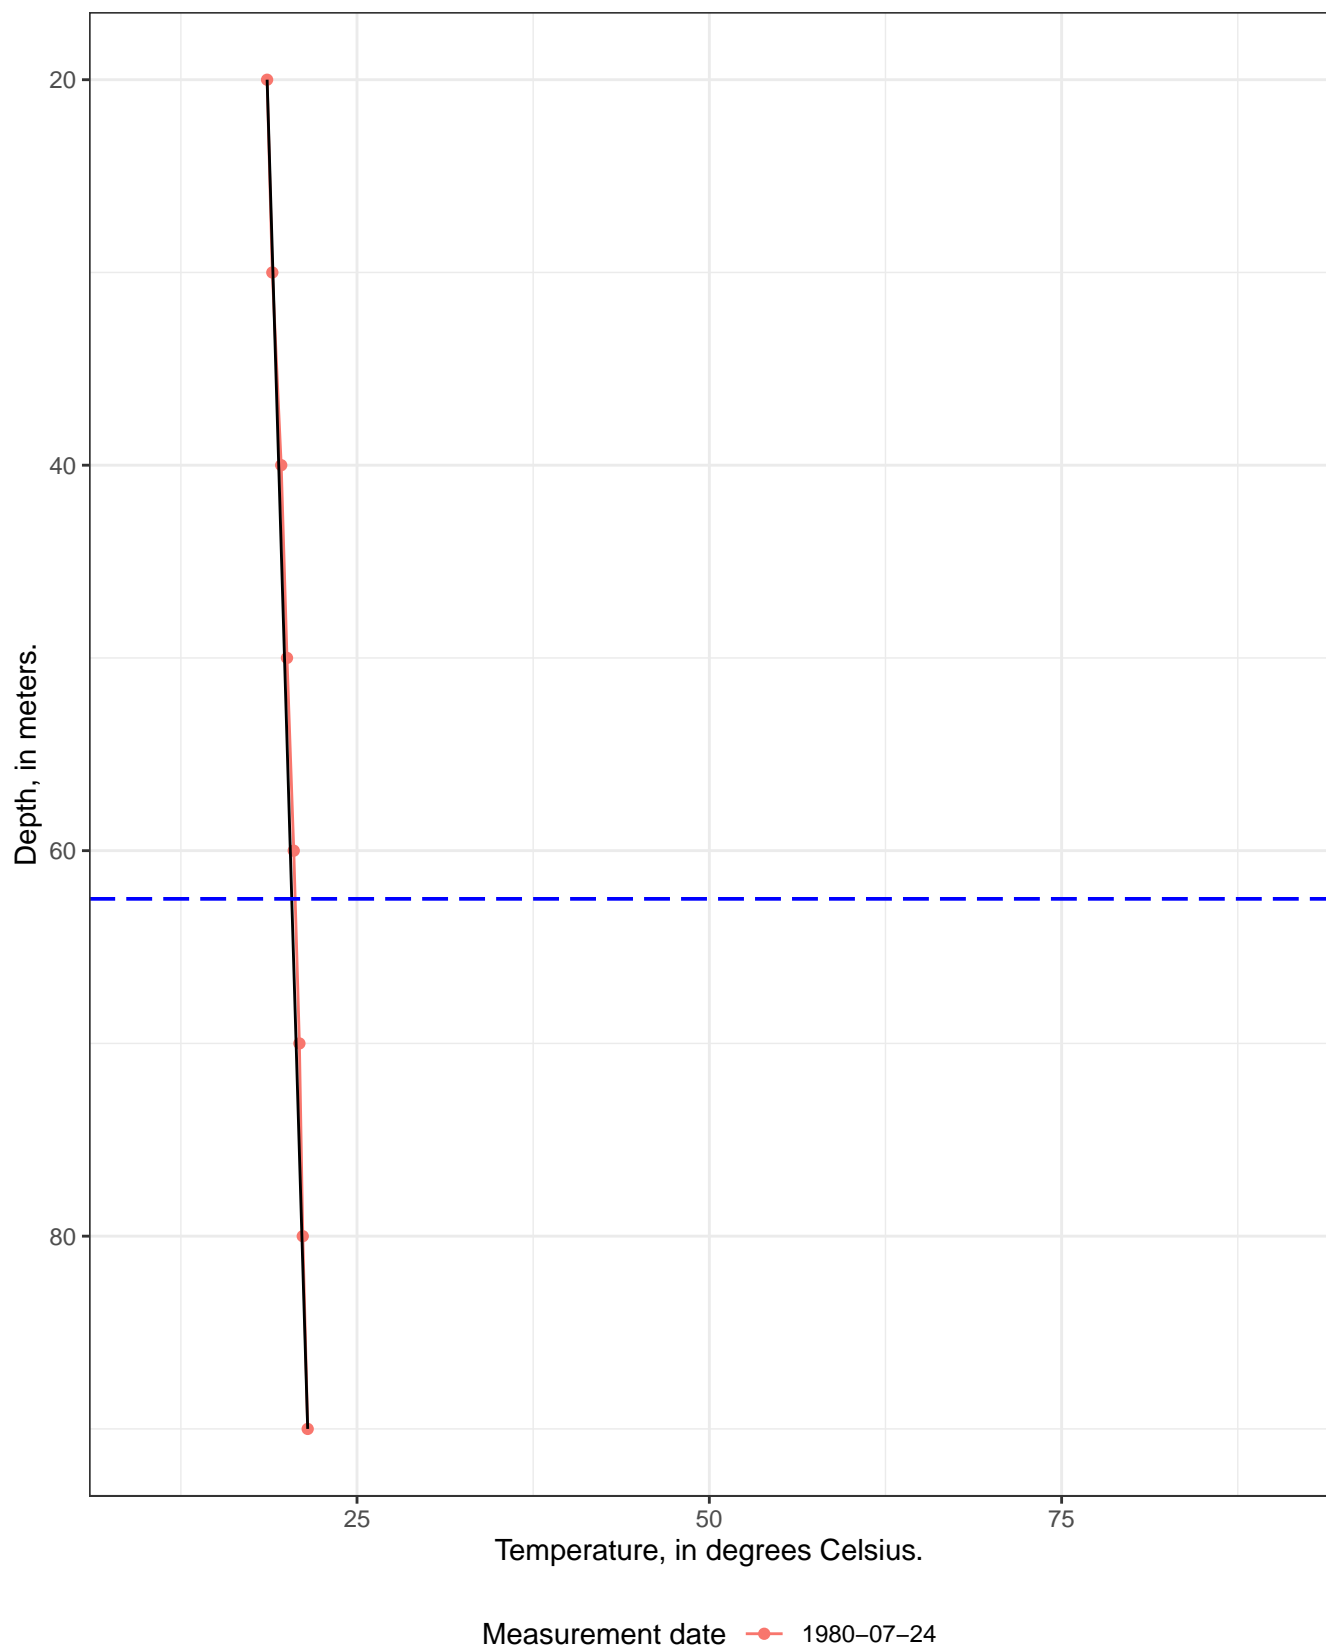

ID: 5 [Amax\_80-188]

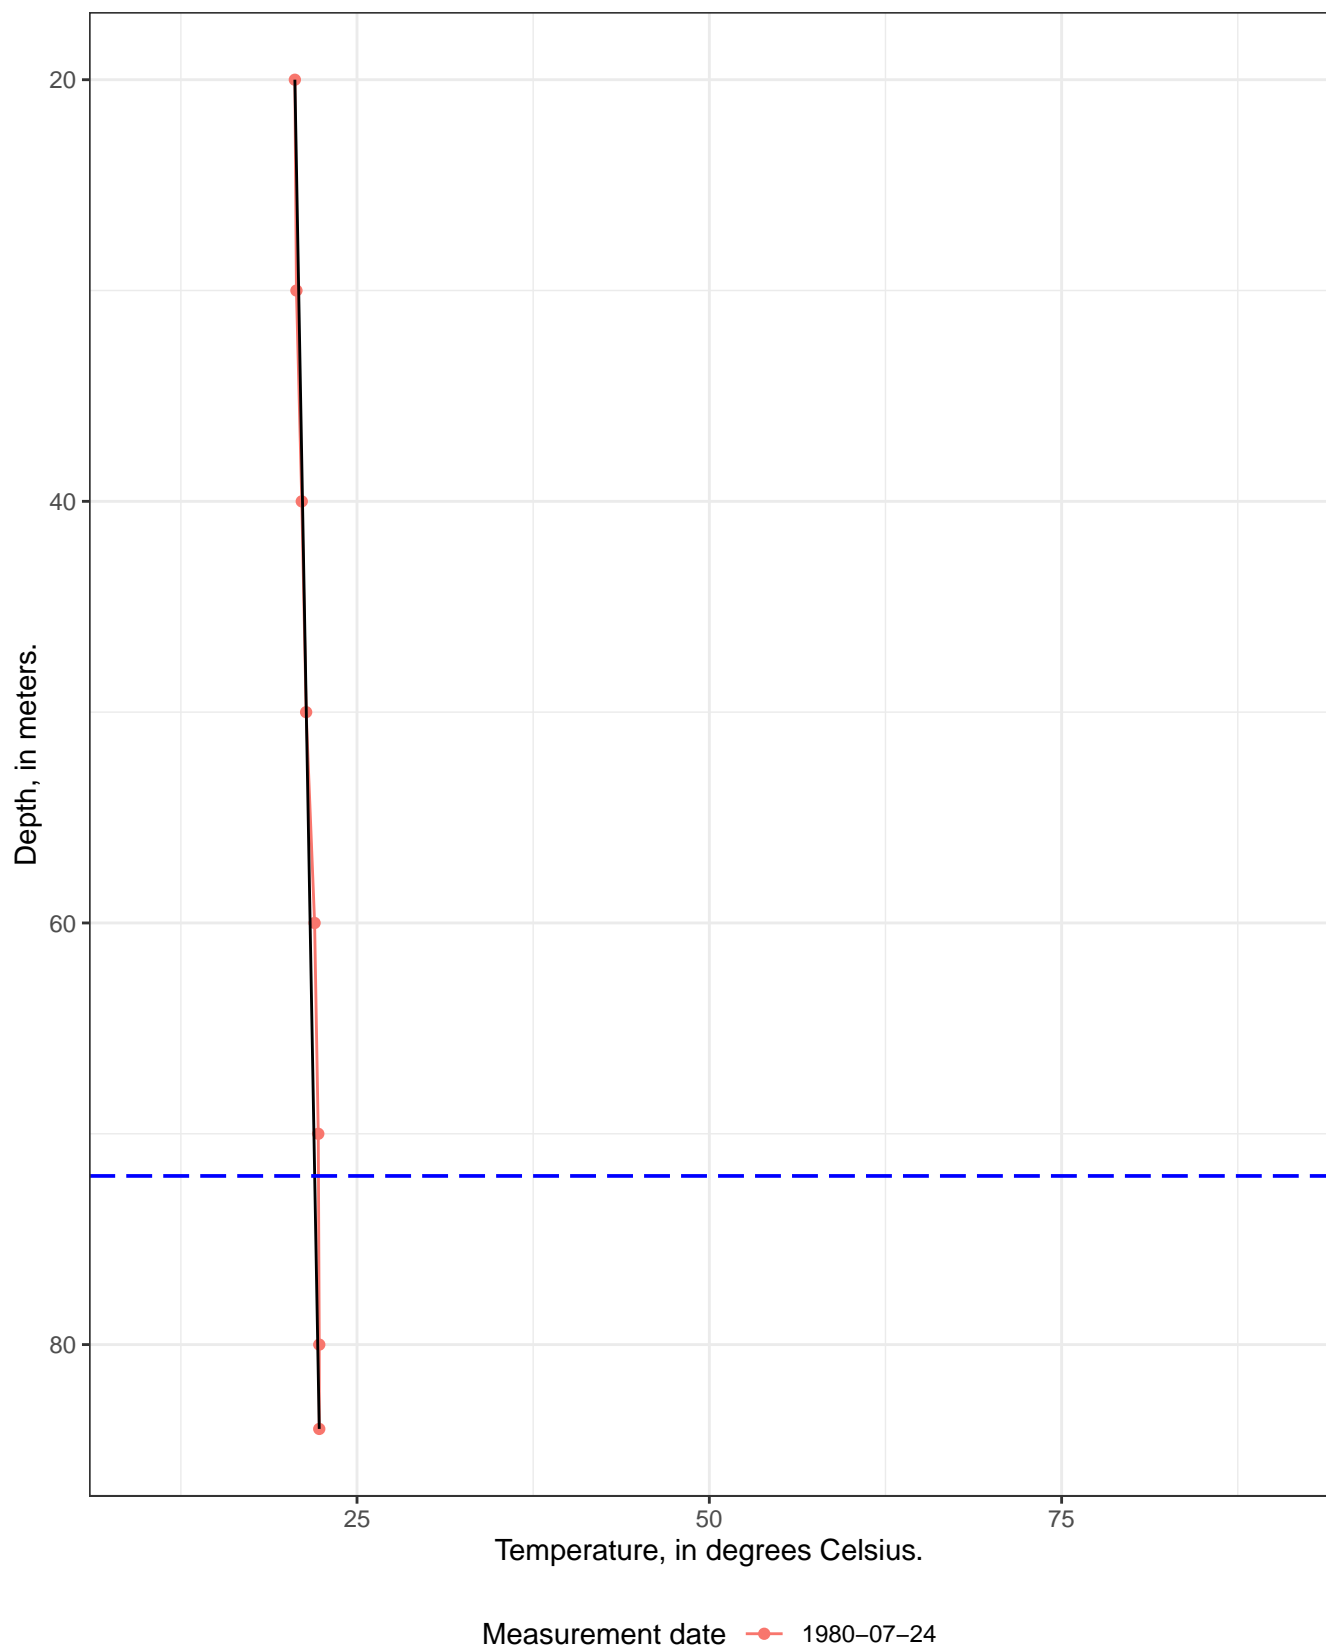

ID: 6 [Amax\_80-206]

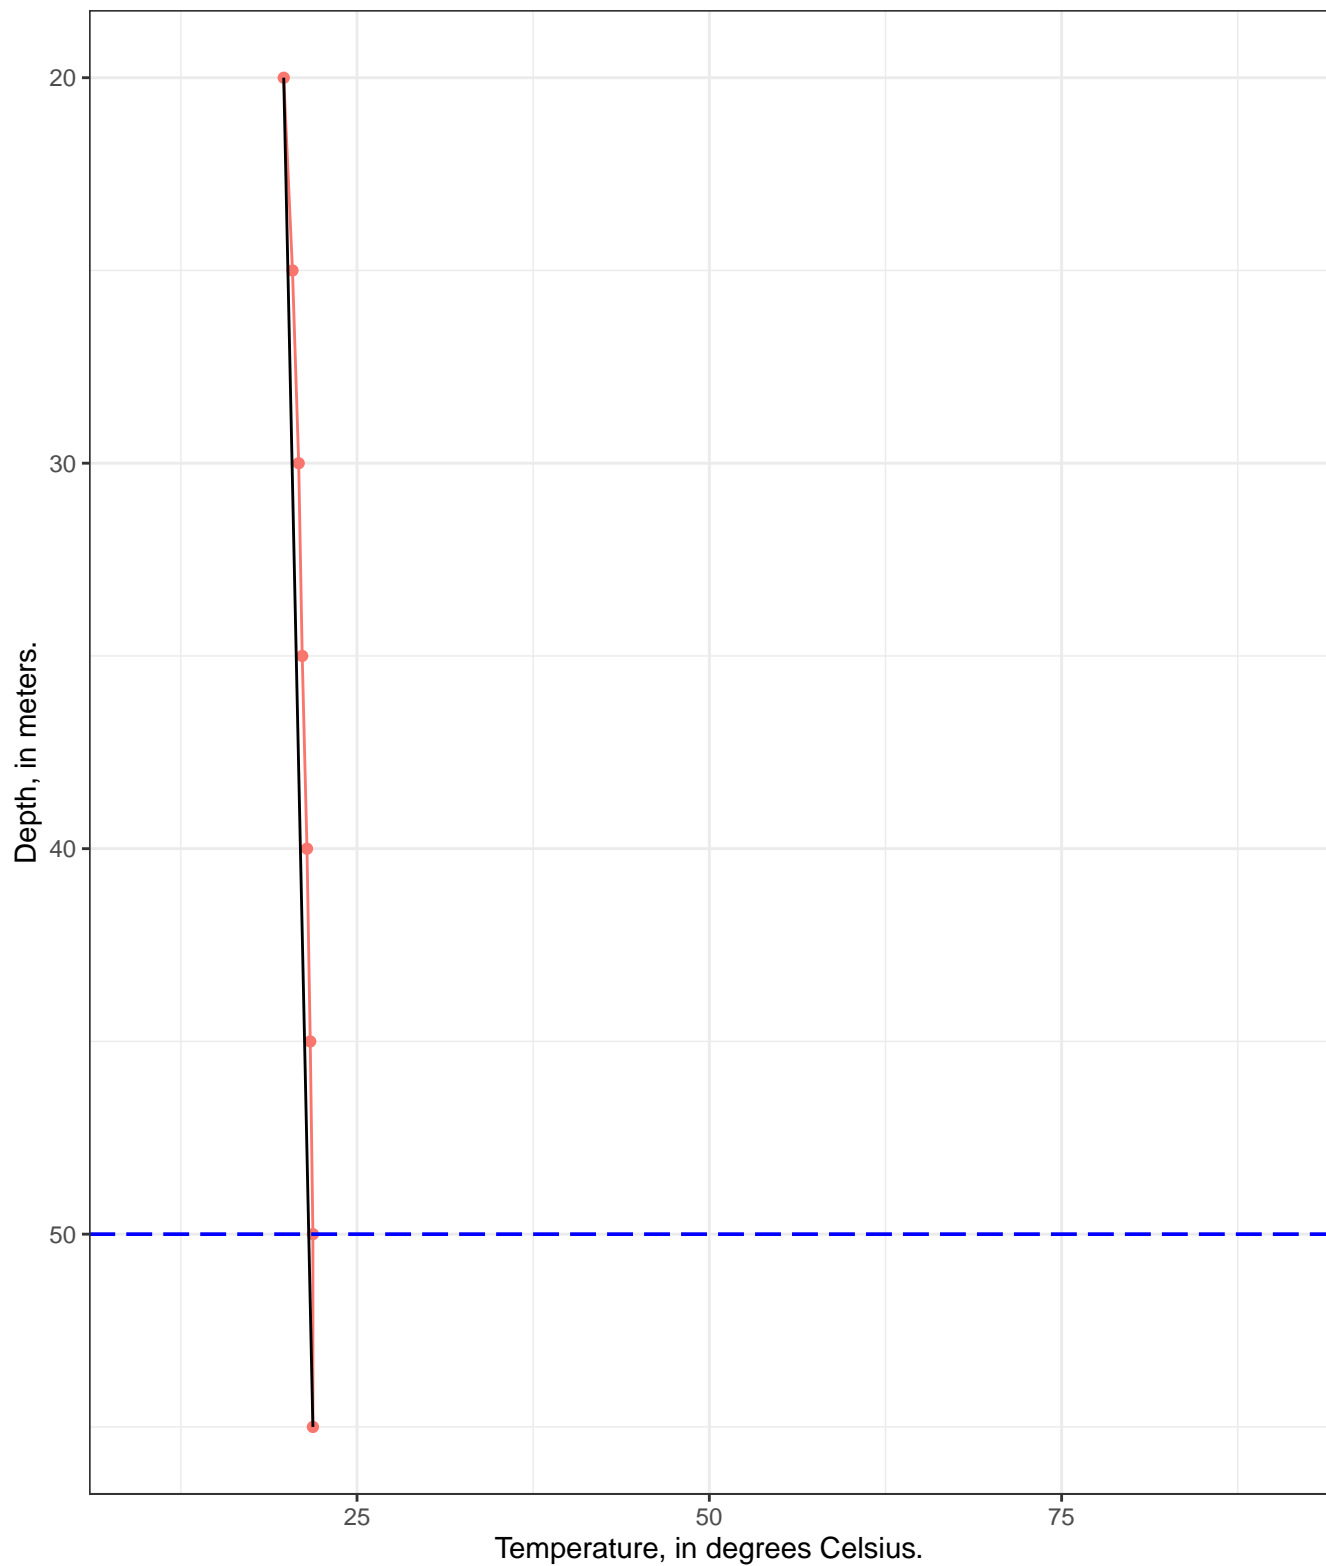

Measurement date 1980-07-24

ID: 7 [Amax\_80-211]

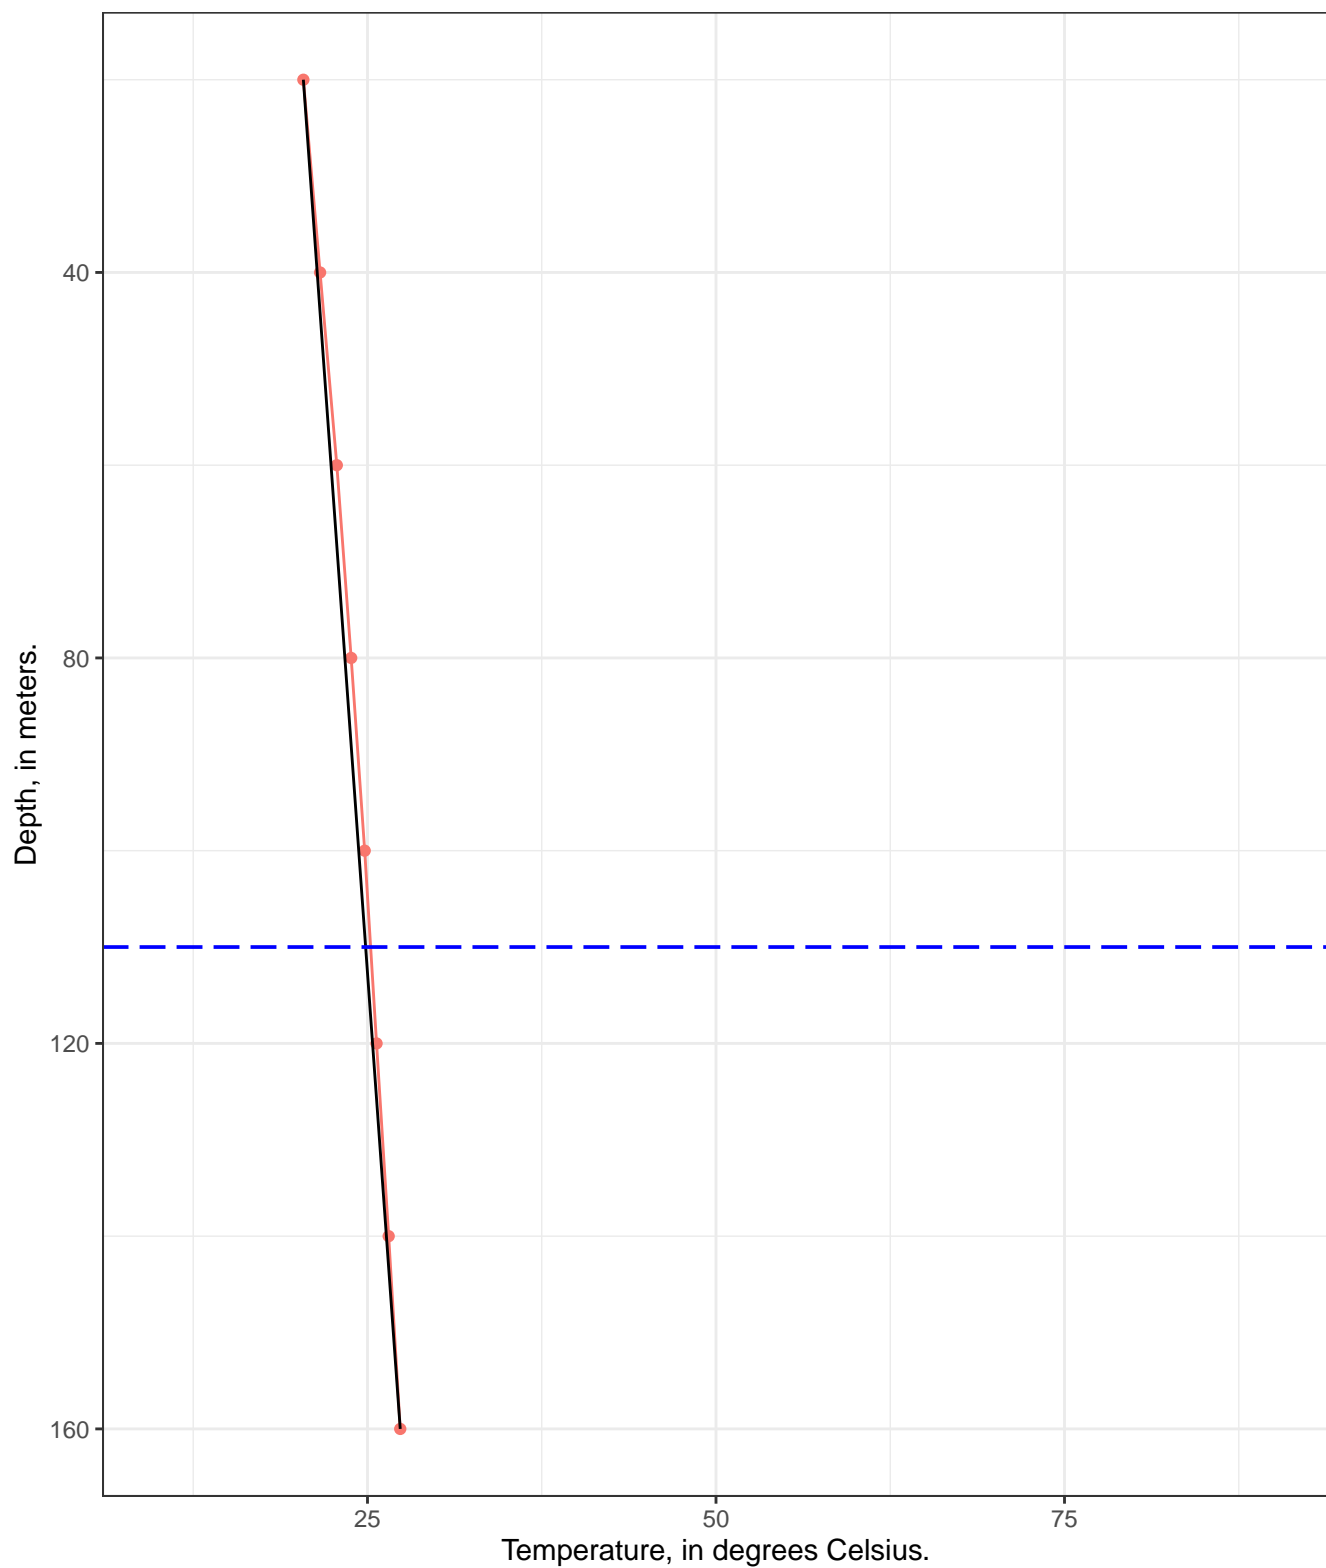

Measurement date 1980-07-25



ID: 8 [Amax\_80-212]

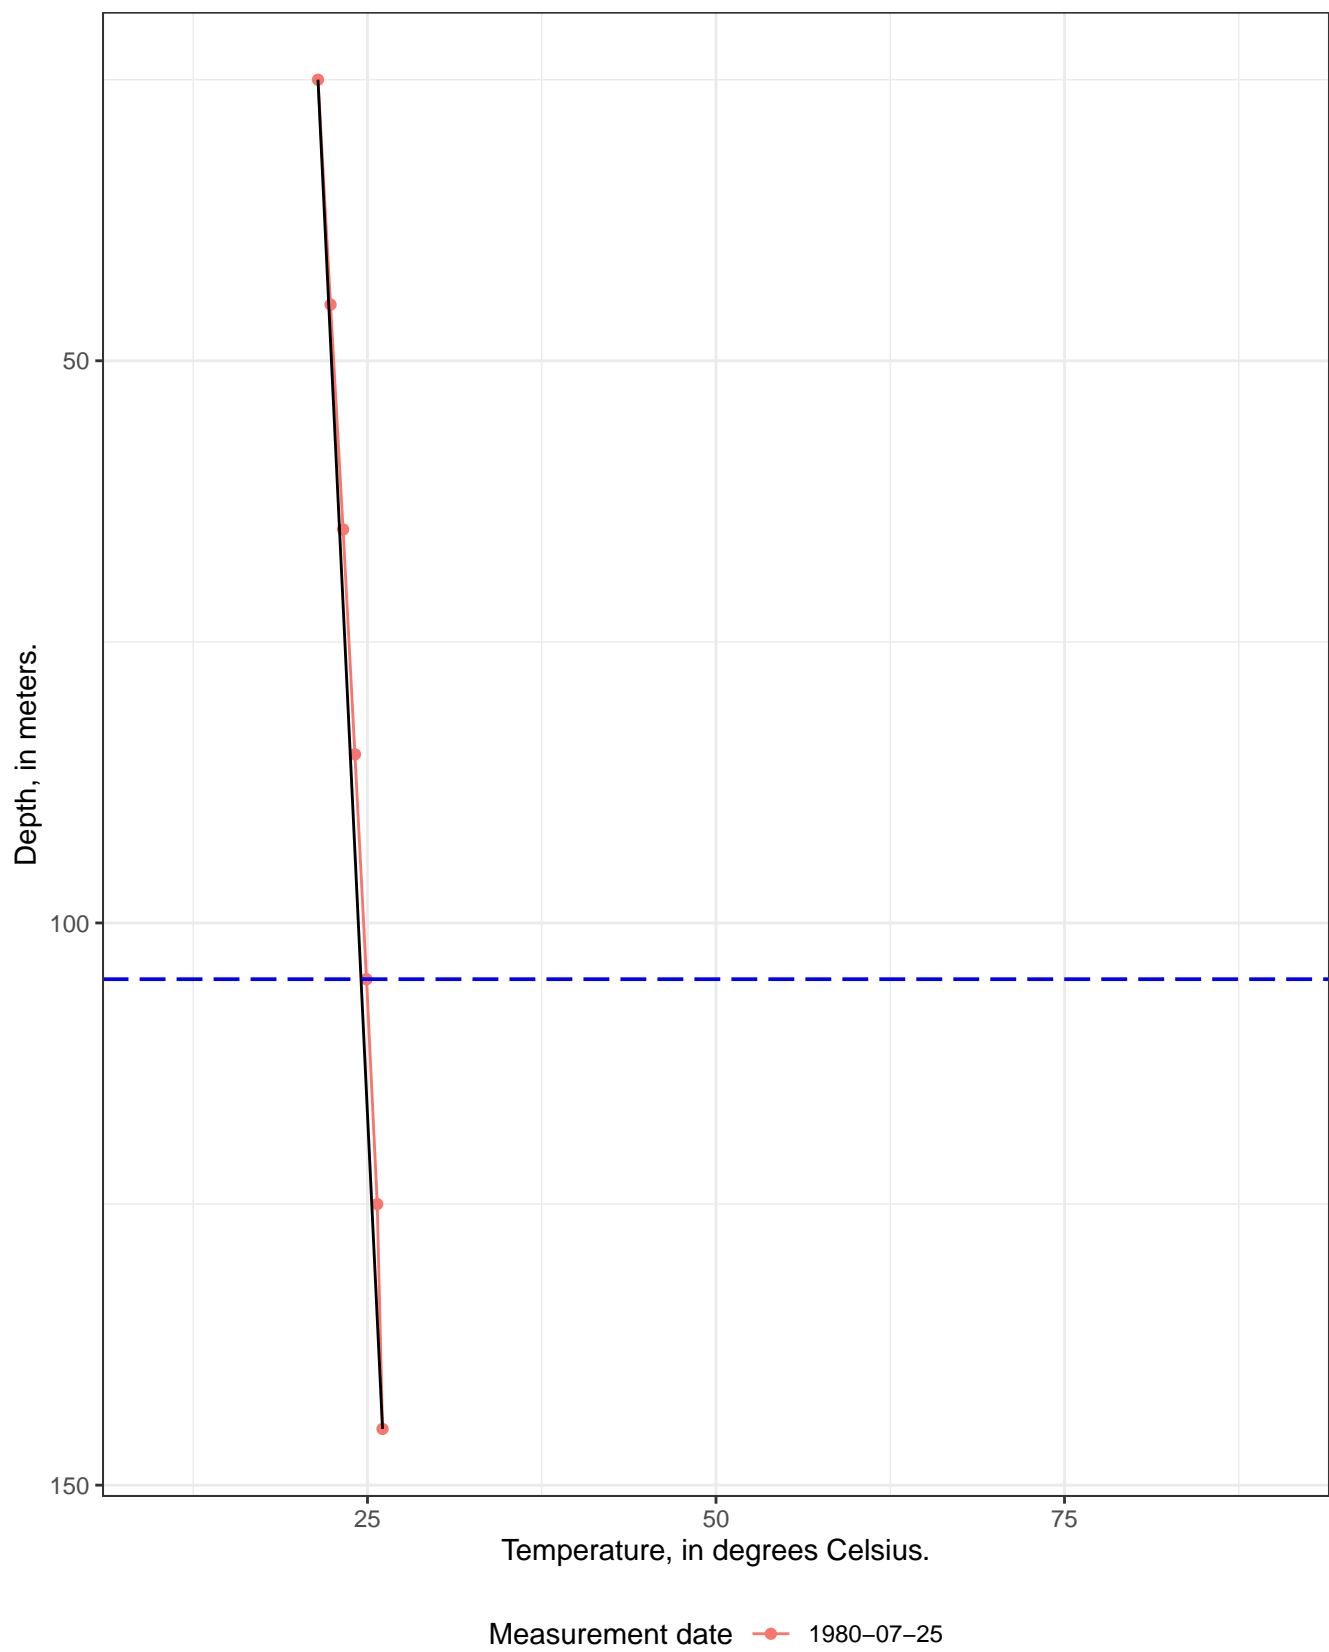

ID: 9 [Amax\_80-213]

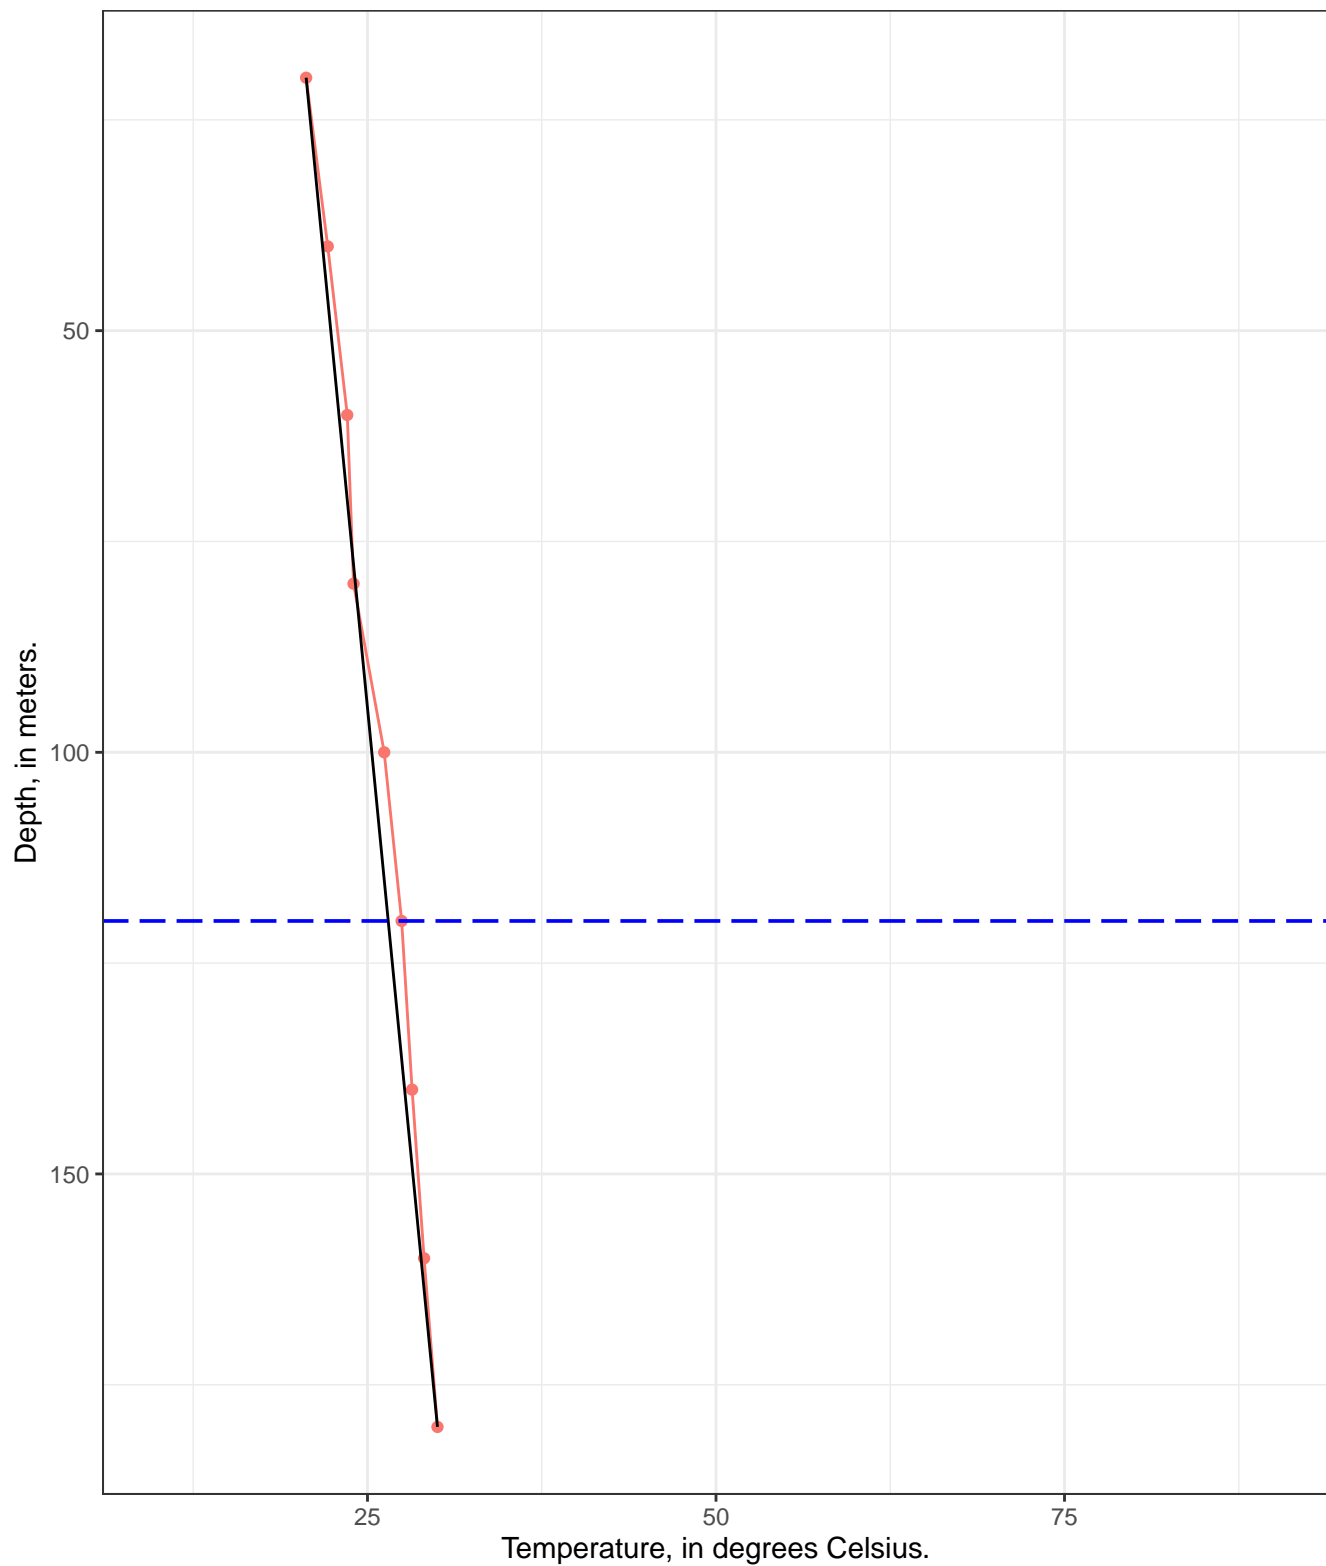

ID: 10 [Amax\_80–214]

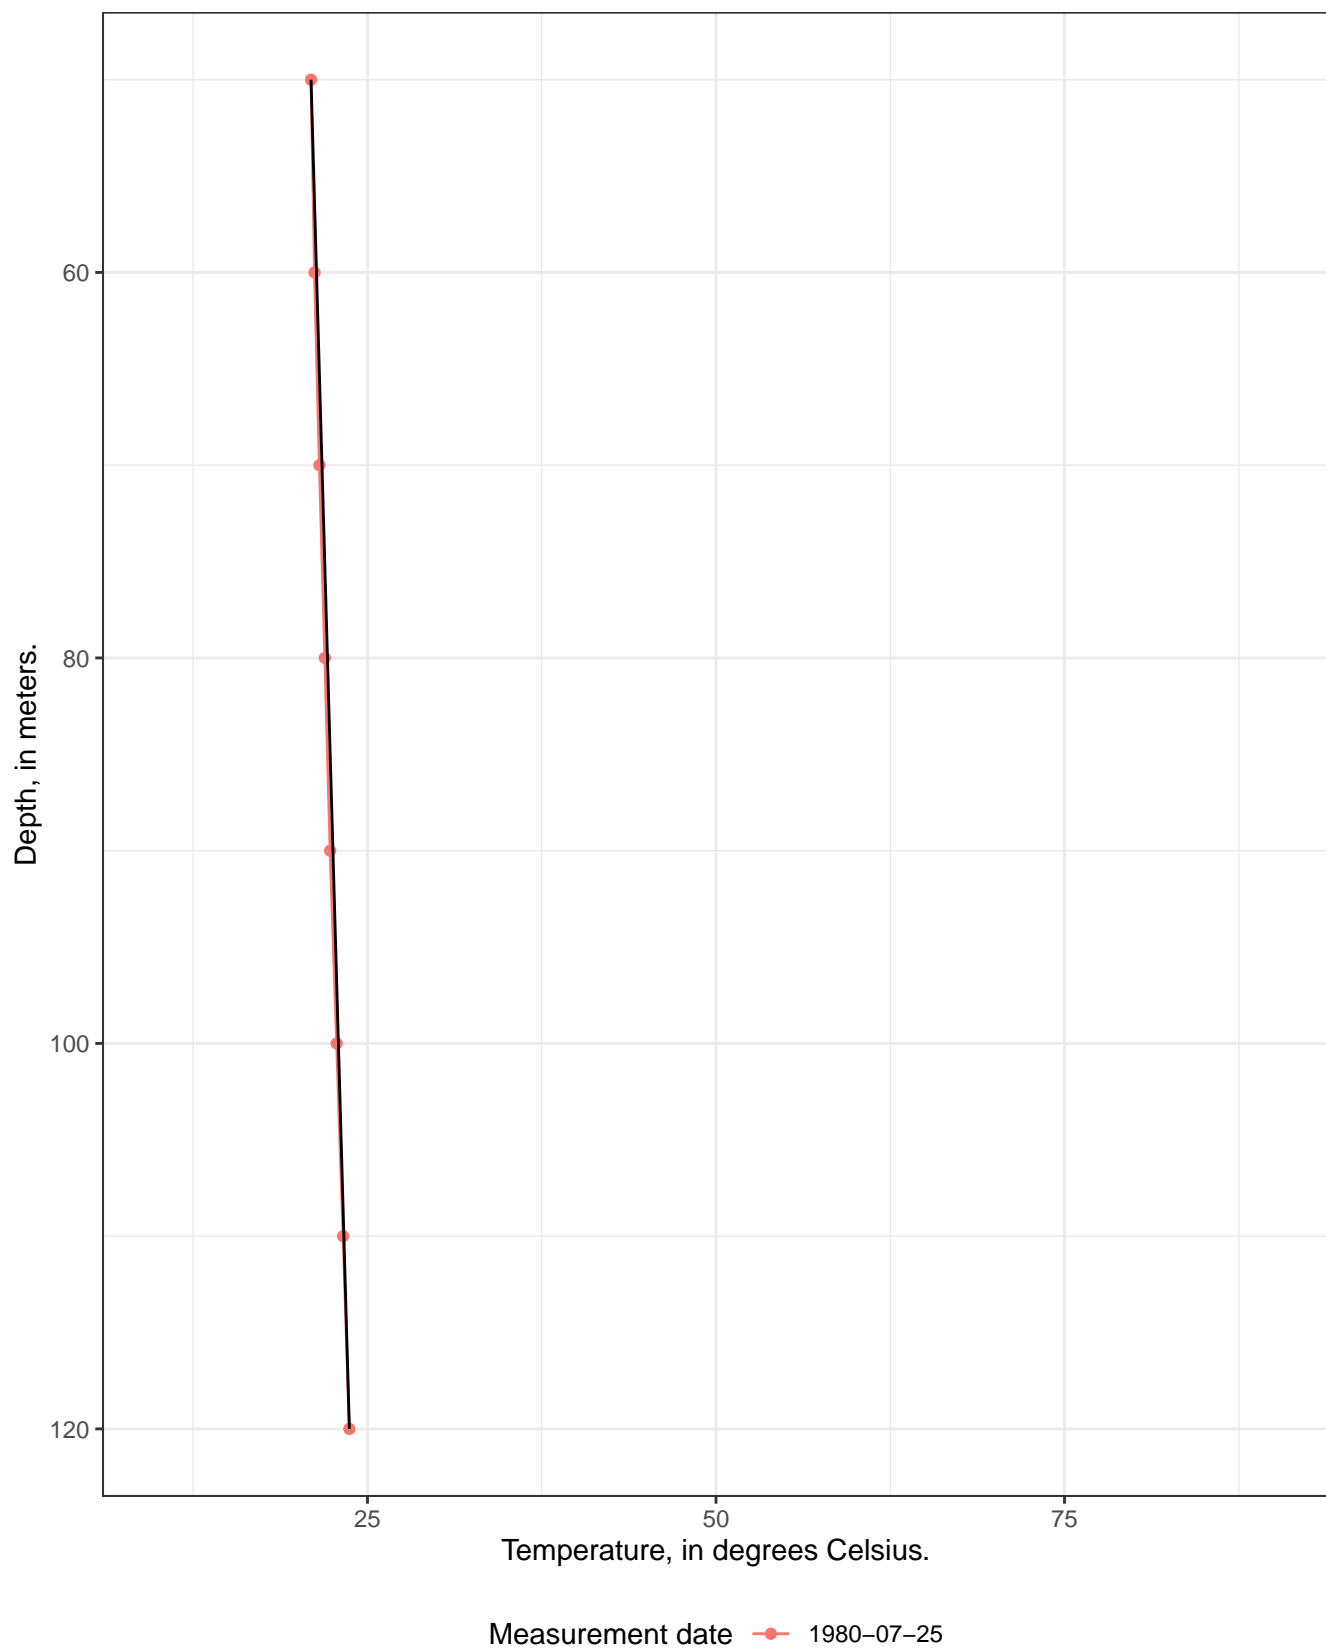

ID: 11 [Amax\_80-257]

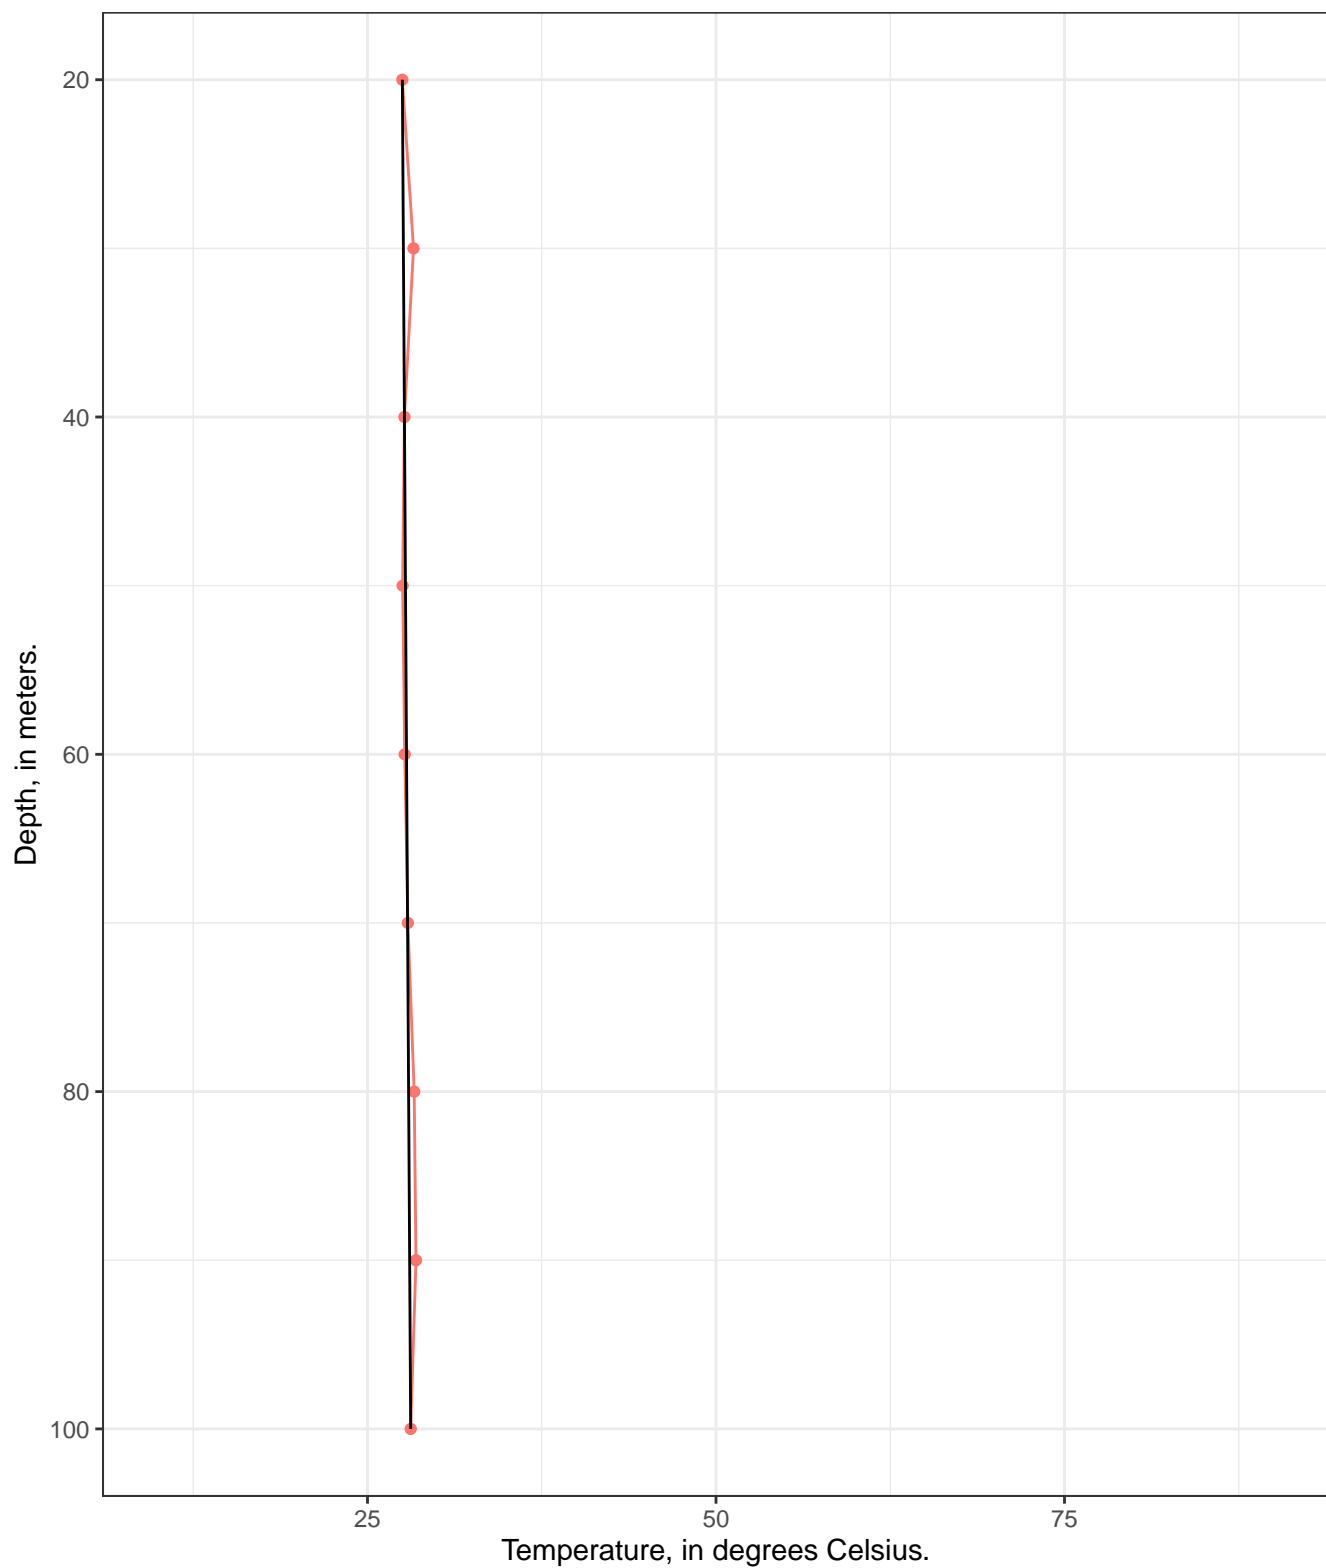

Measurement date 1980-12-12

ID: 12 [Amax\_80-258]

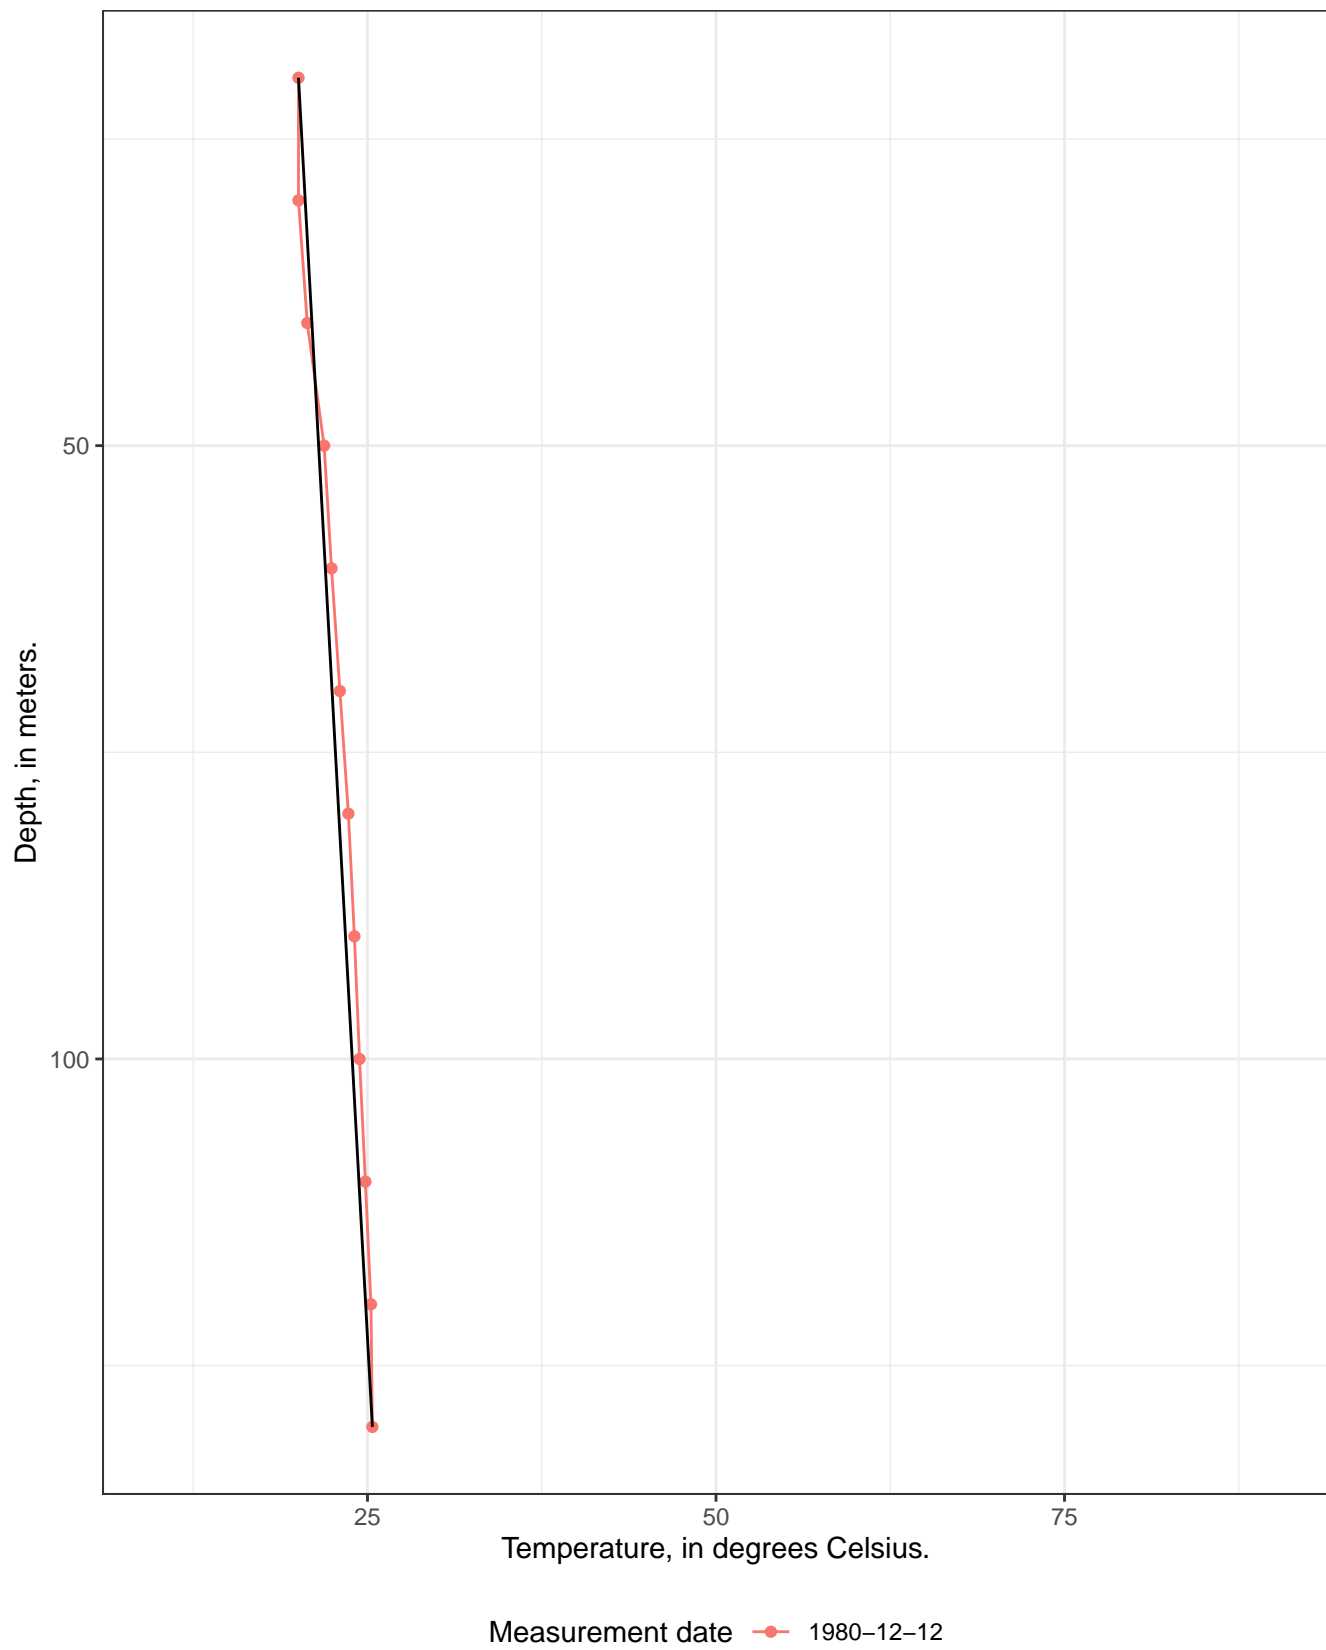

ID: 13 [Amax\_80–259]

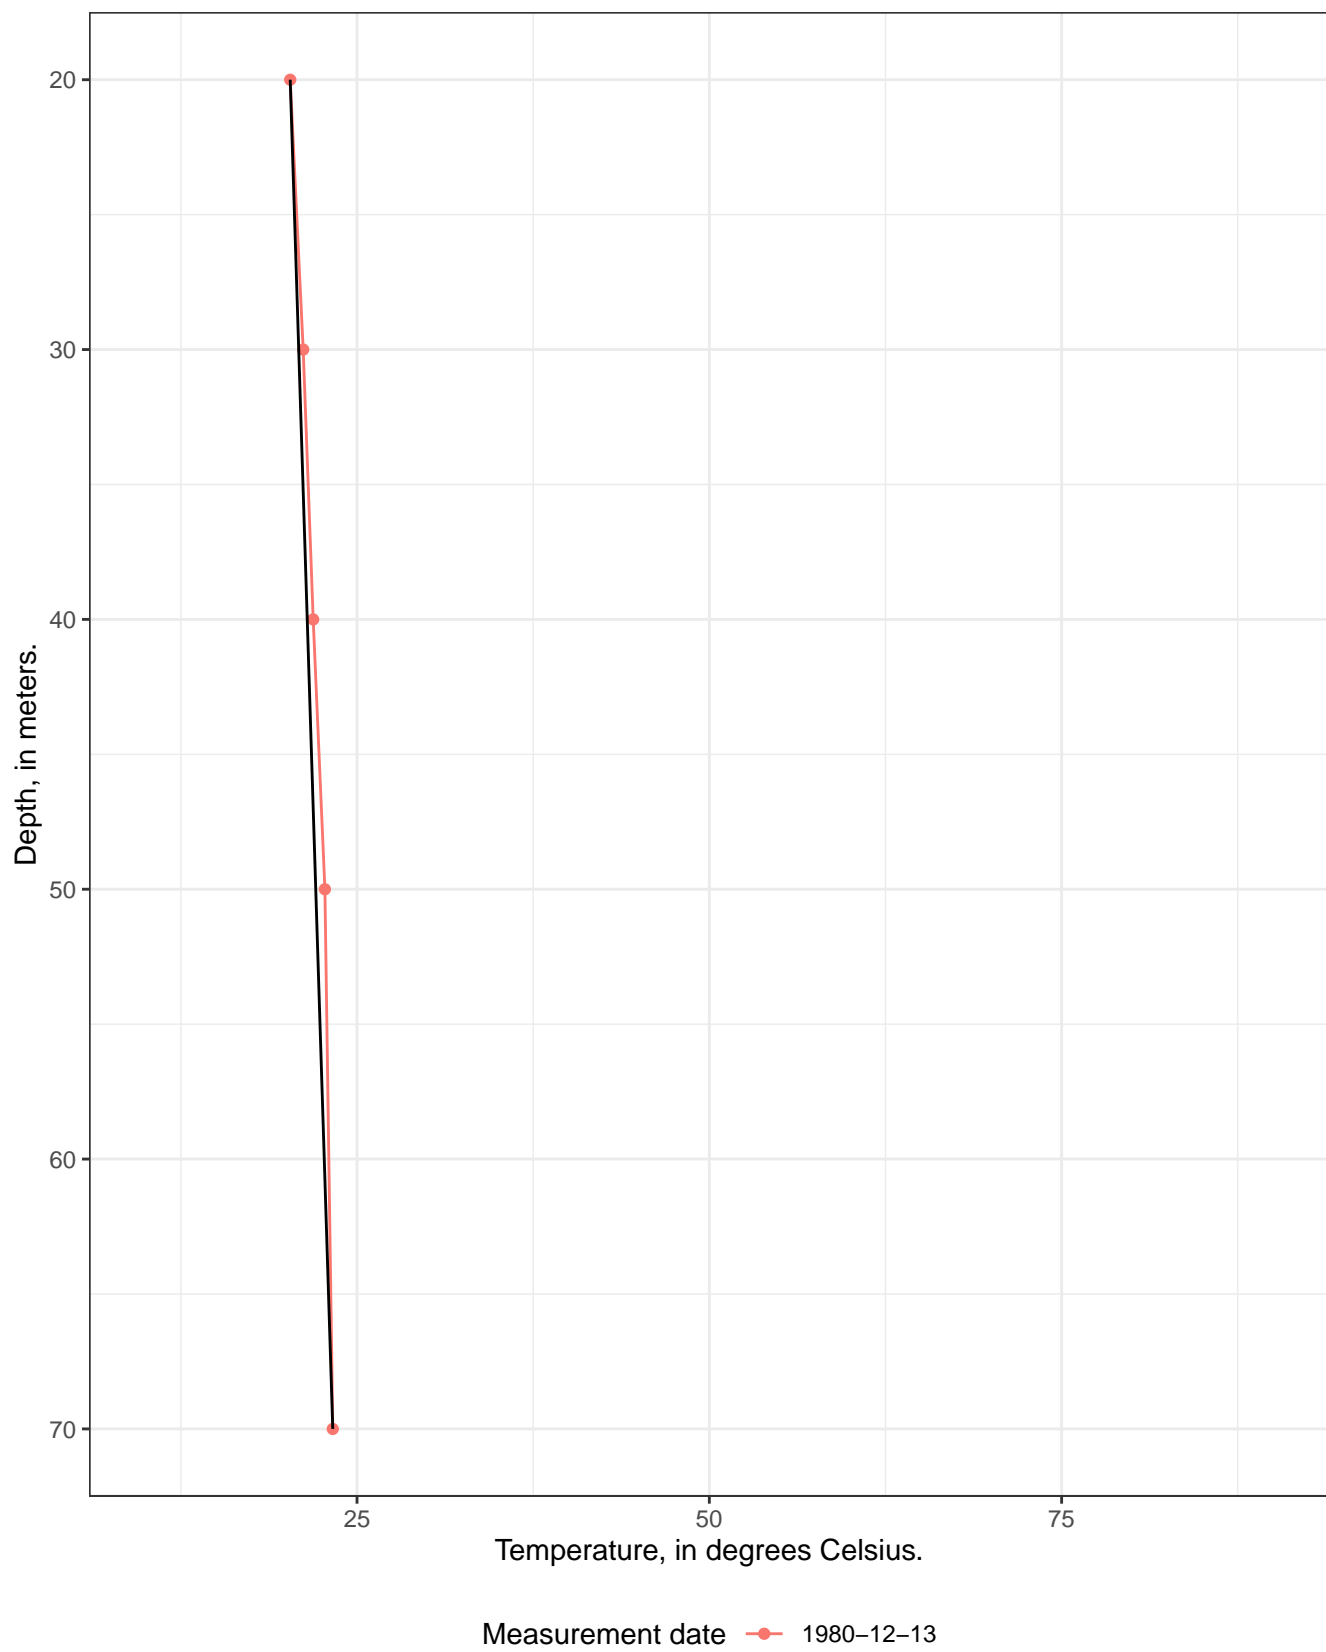

ID: 14 [Amax\_80–260]

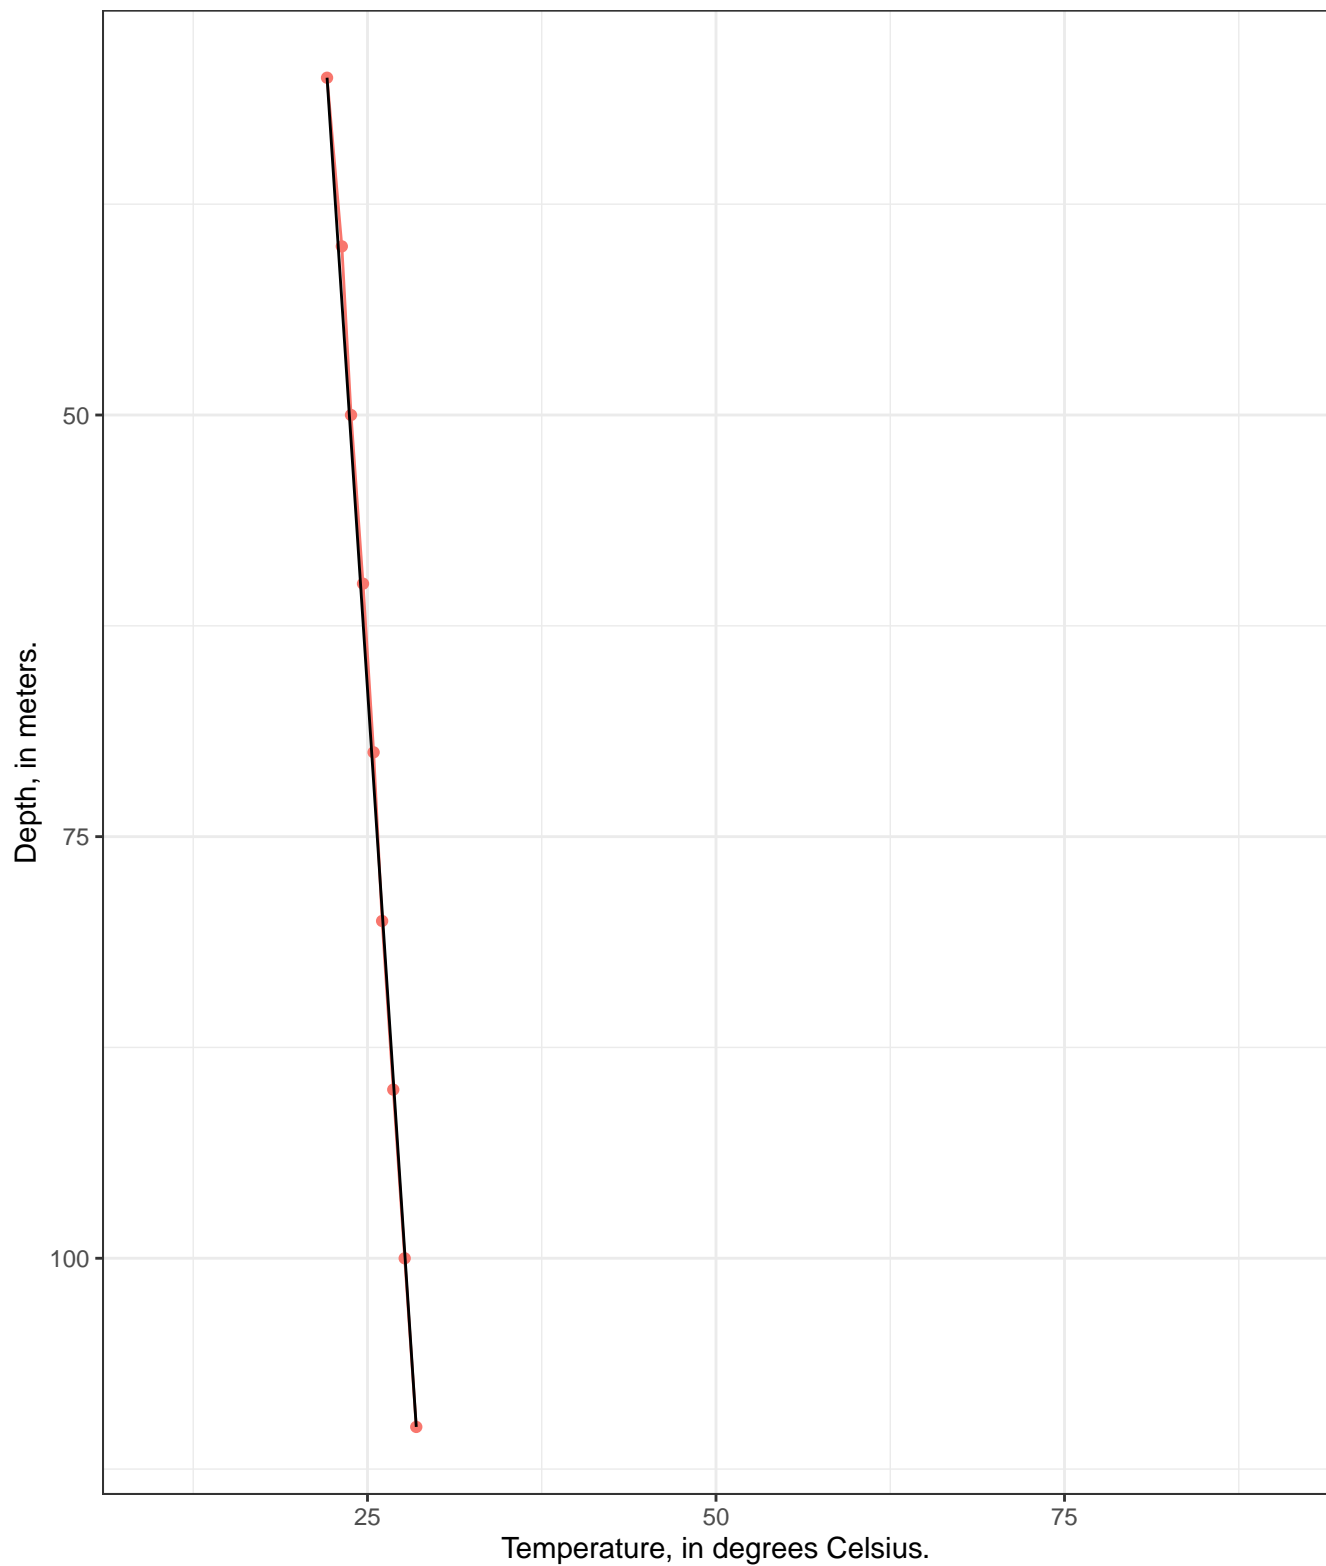

ID: 15 [Amax\_80–261]

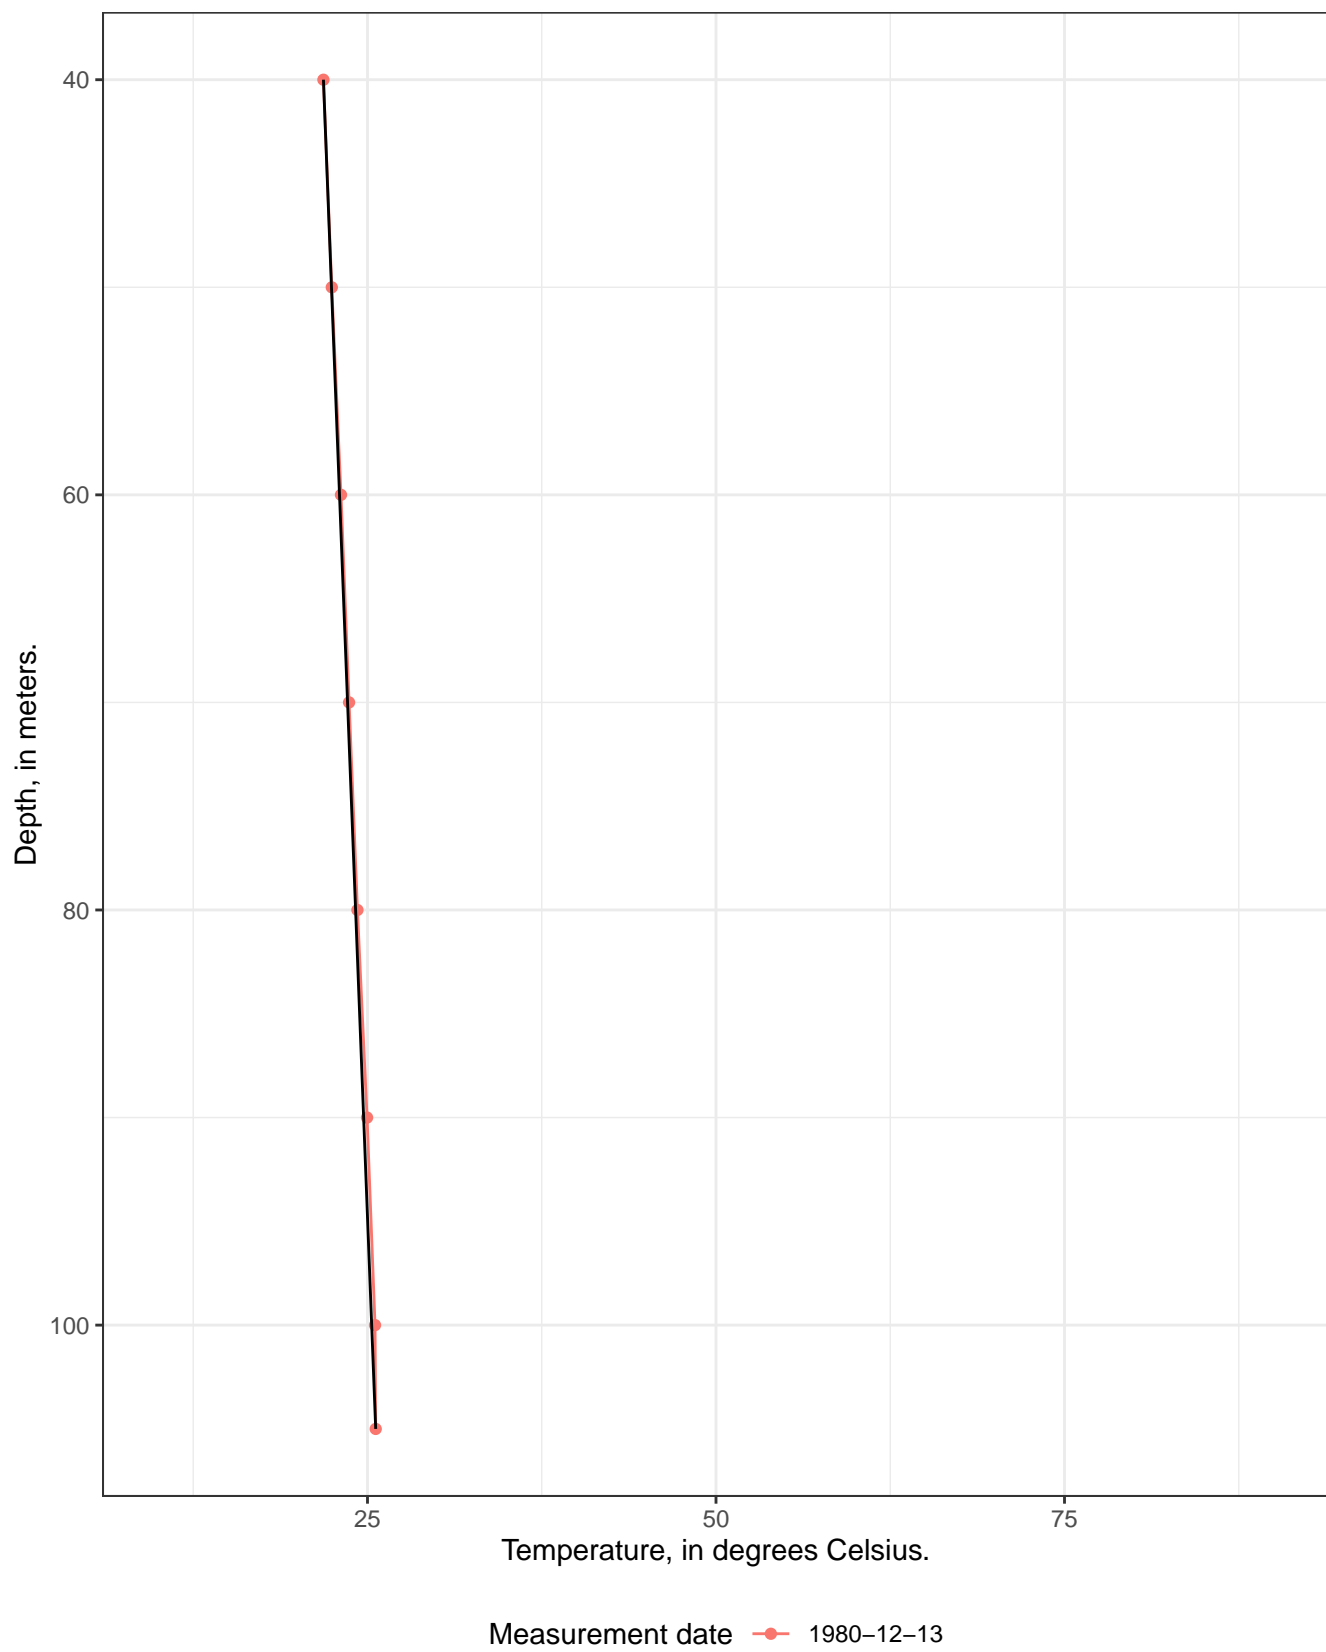



ID: 16 [Amax\_80–262]

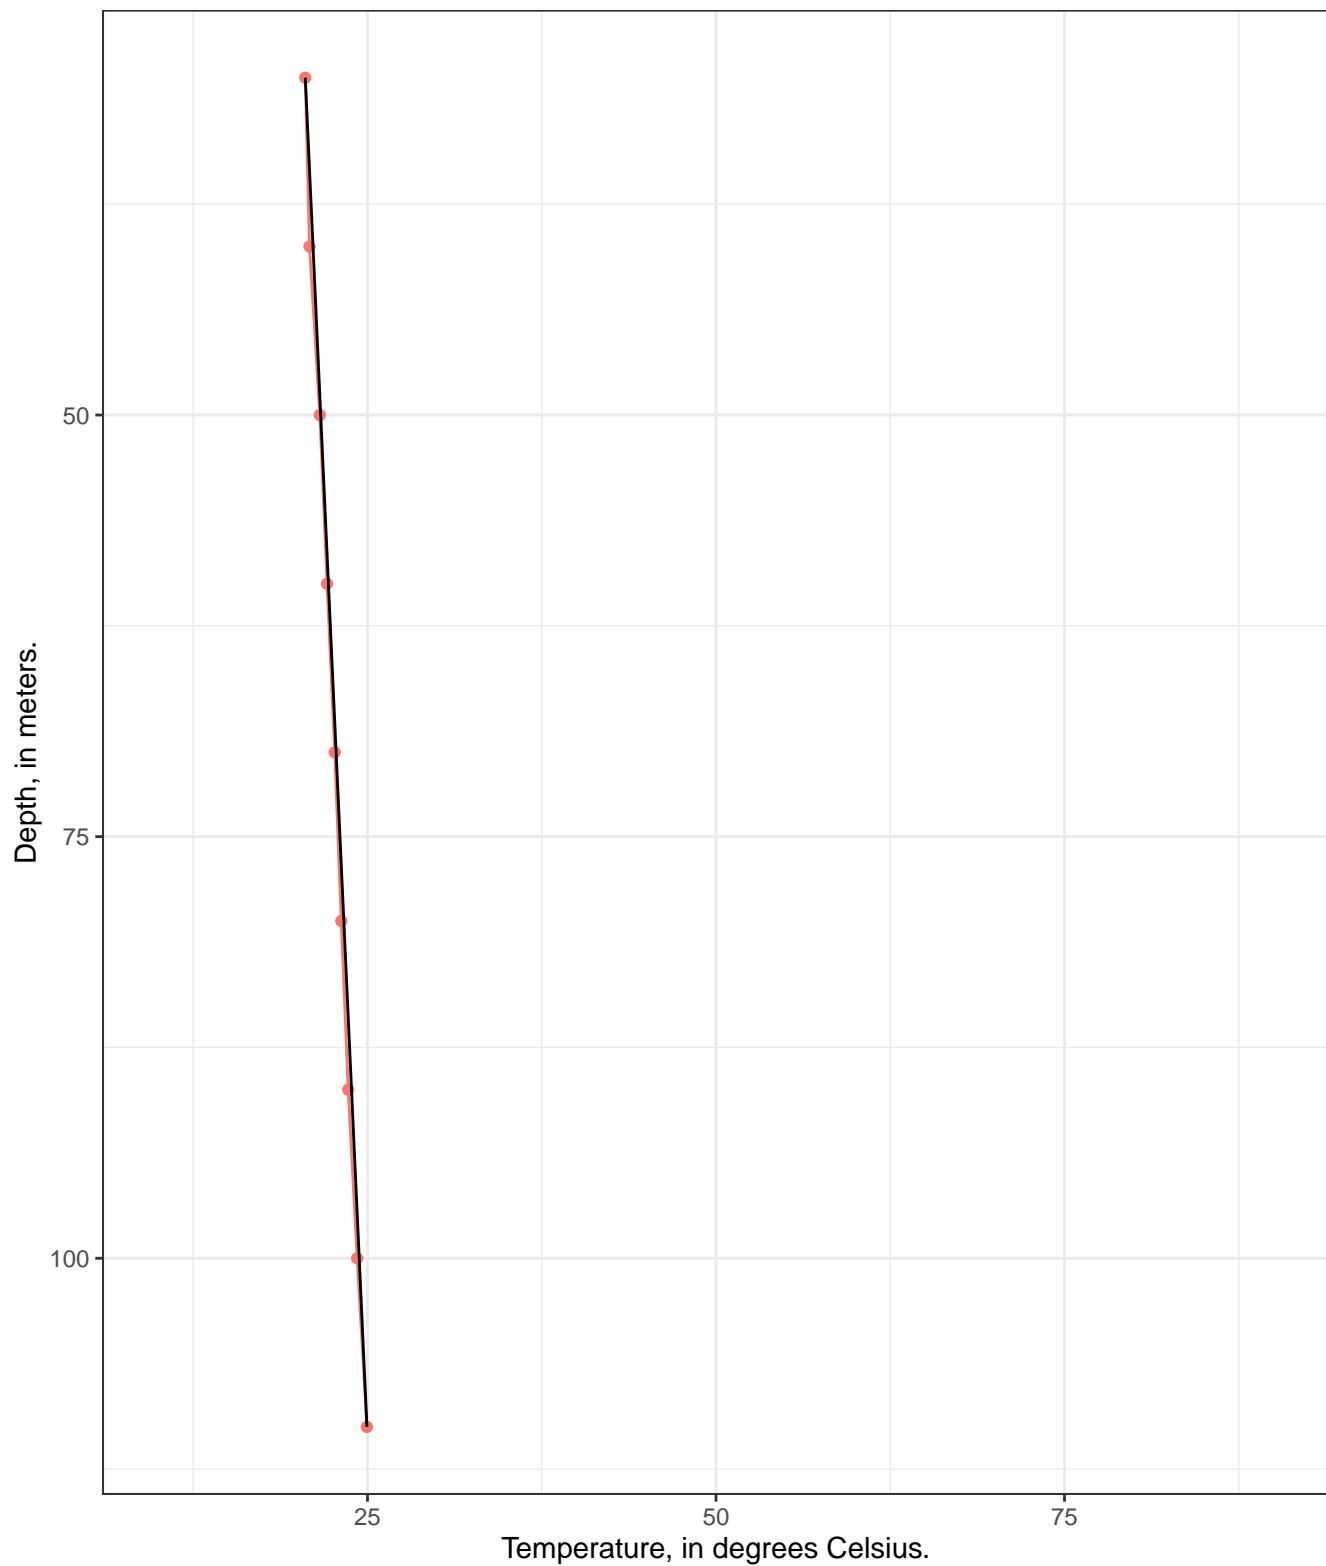

Measurement date 1980-12-14

ID: 17 [Amax\_80–263]

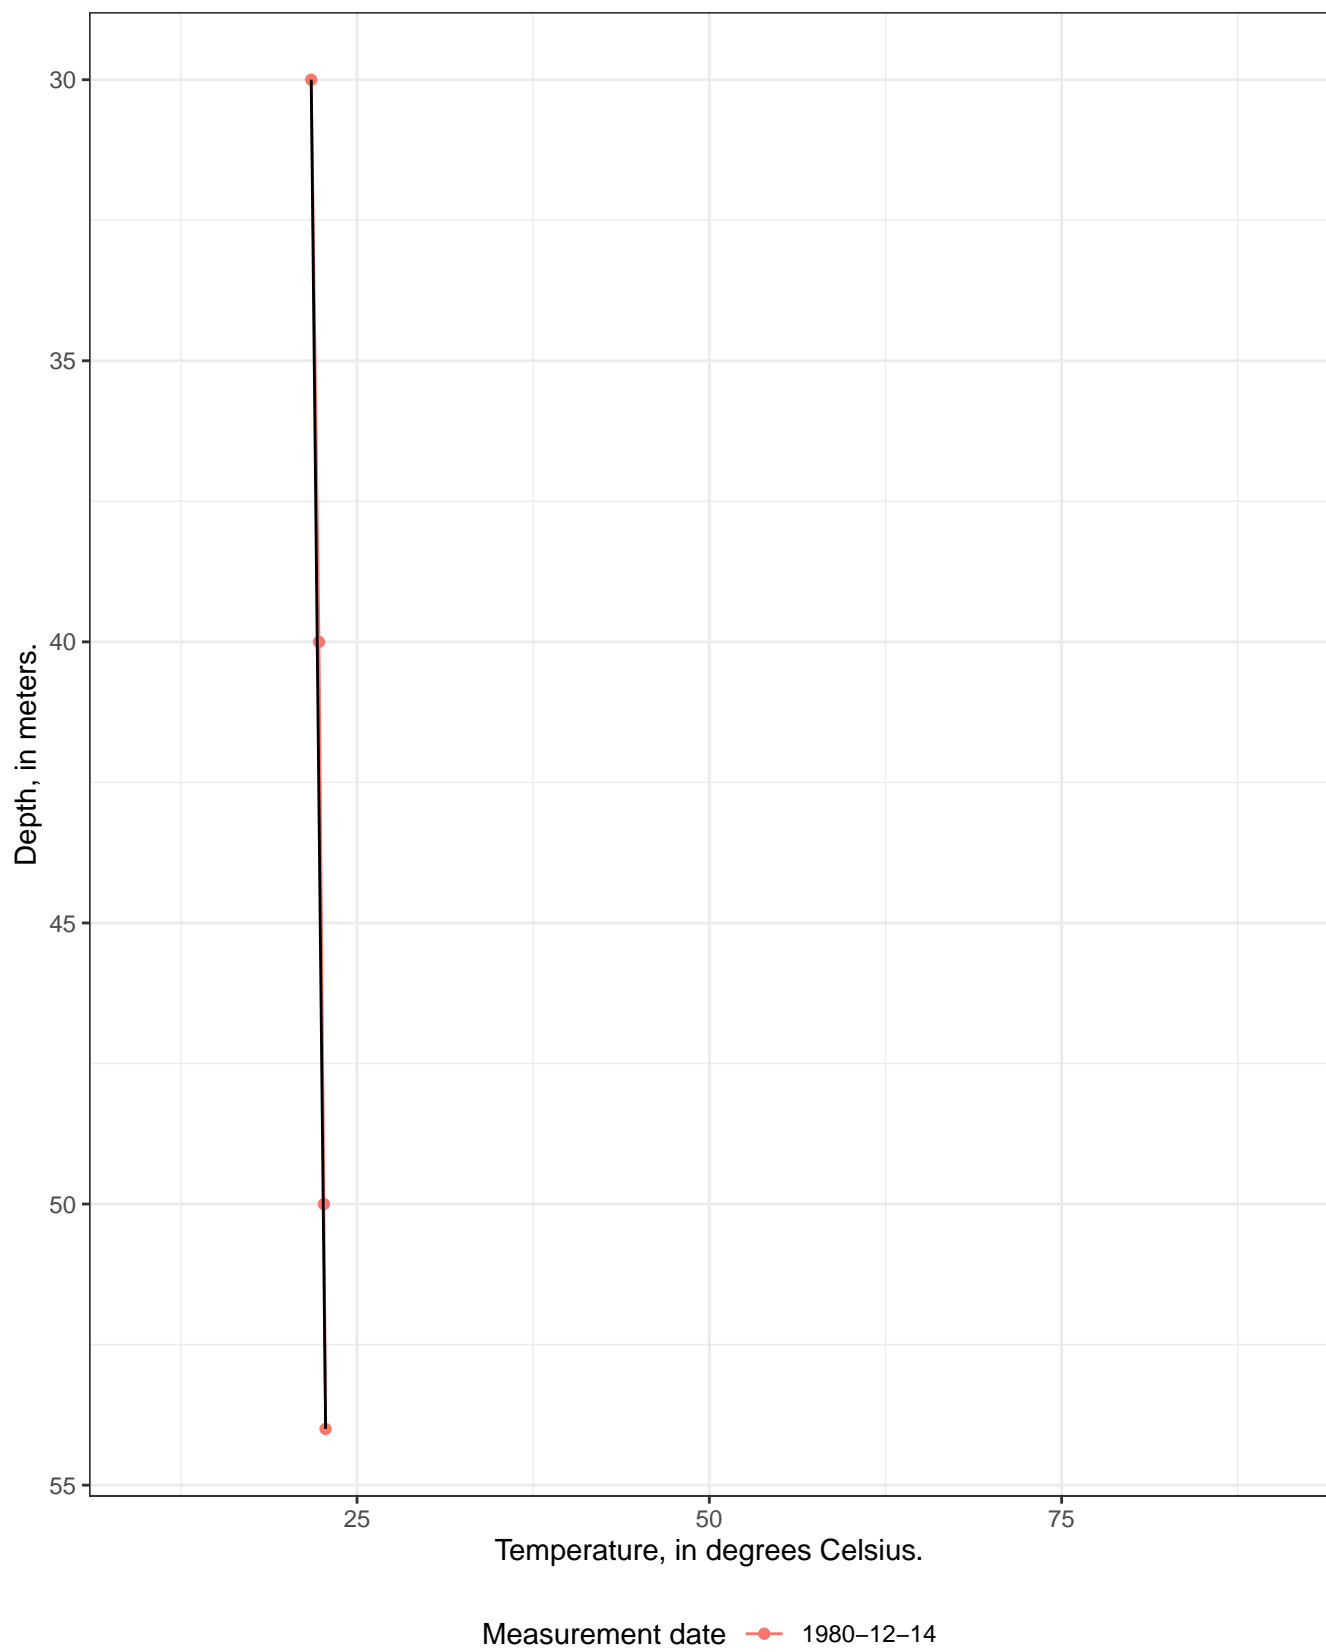

ID: 18 [Amax\_80–264]

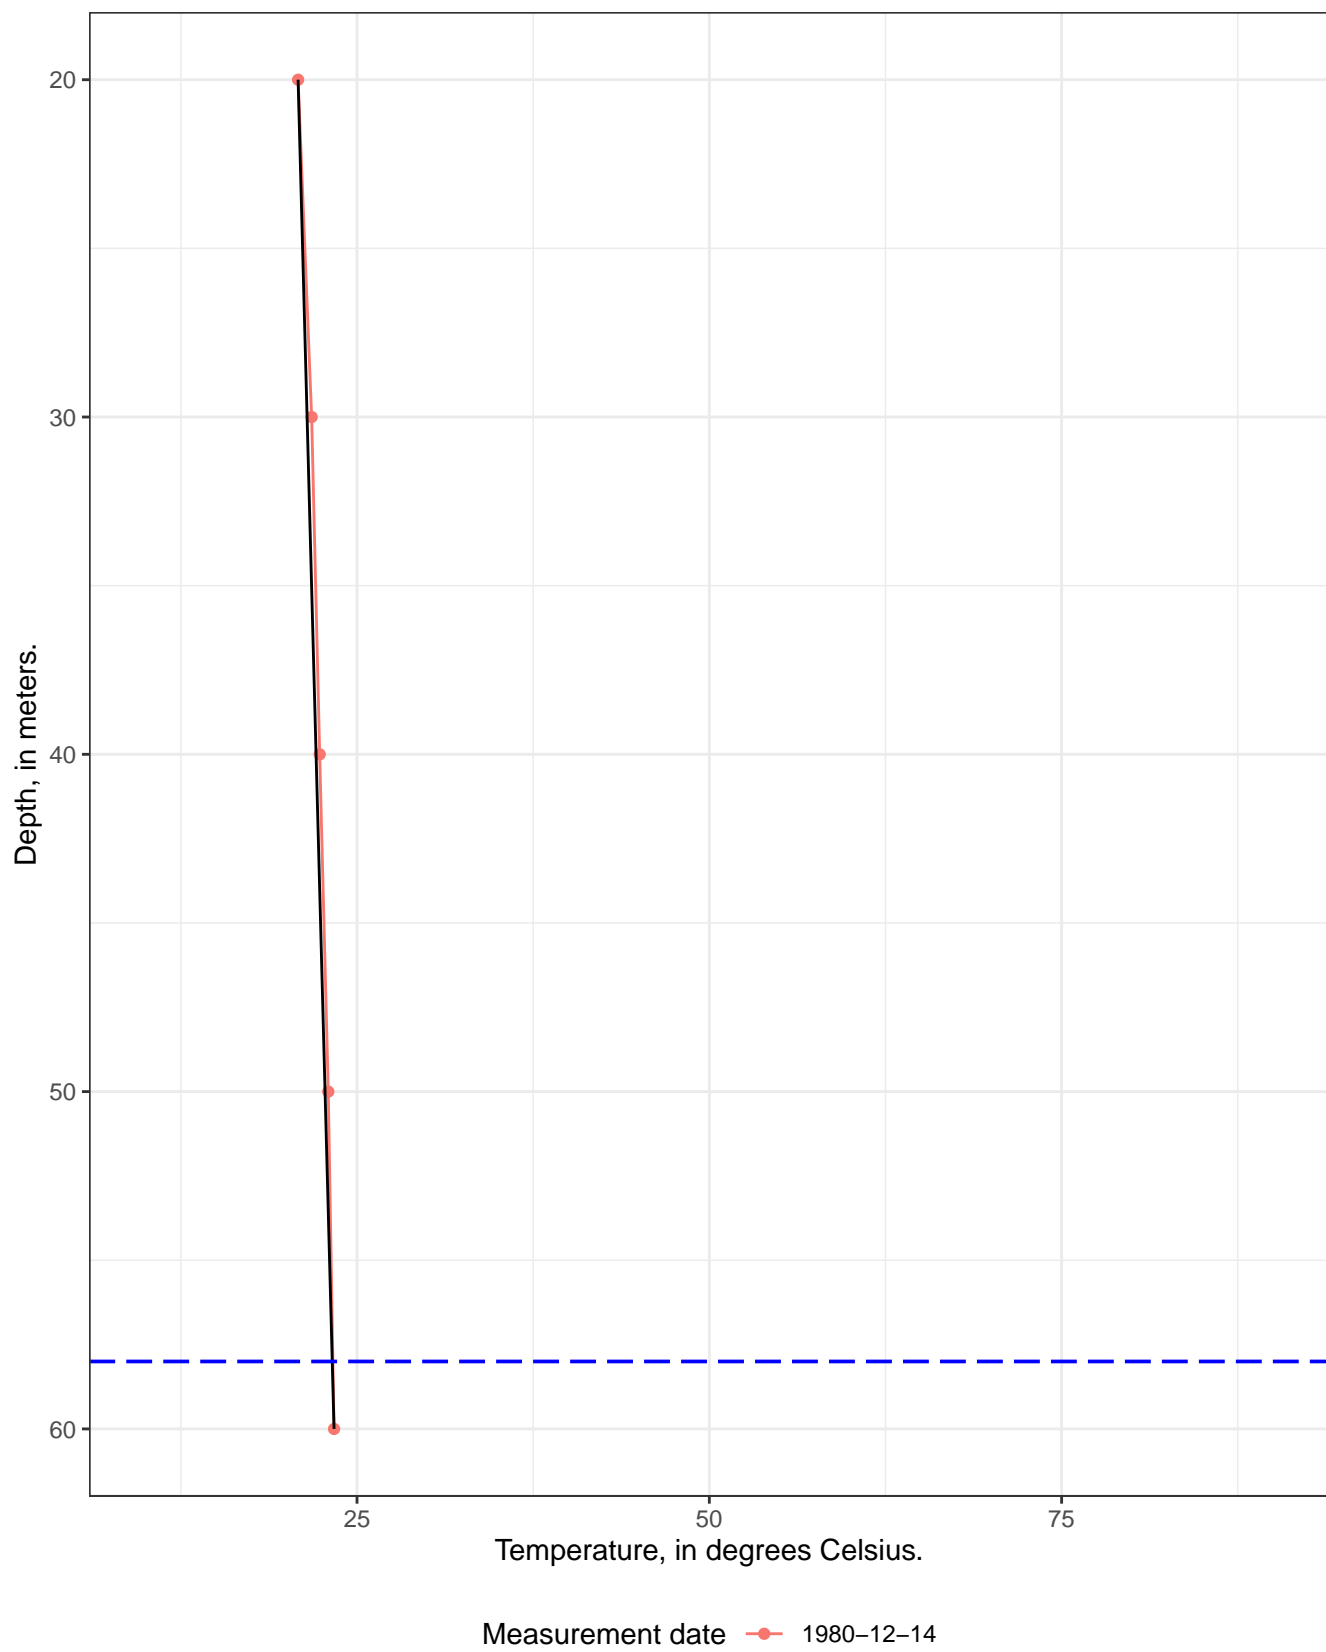

ID: 19 [Amax\_80–266]

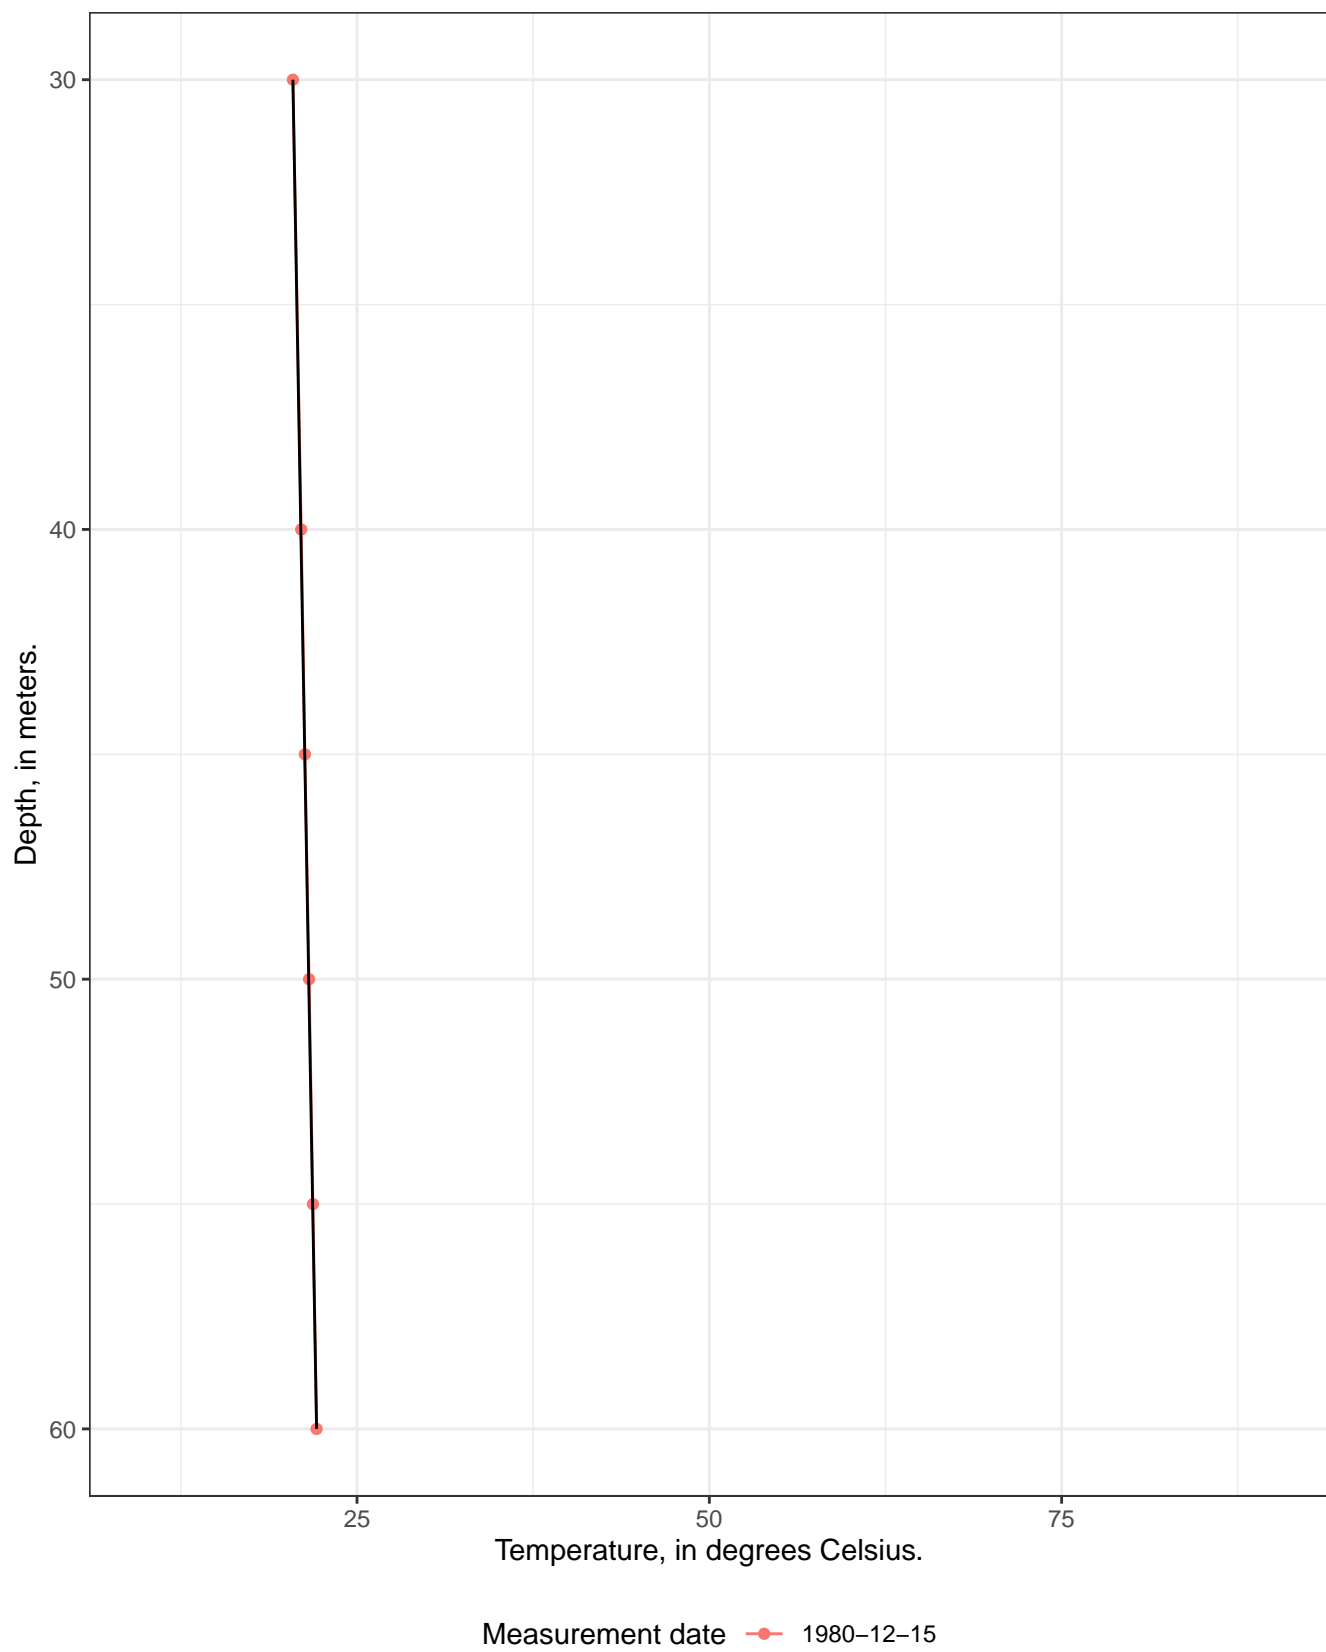

ID: 20 [Amax\_80–267]

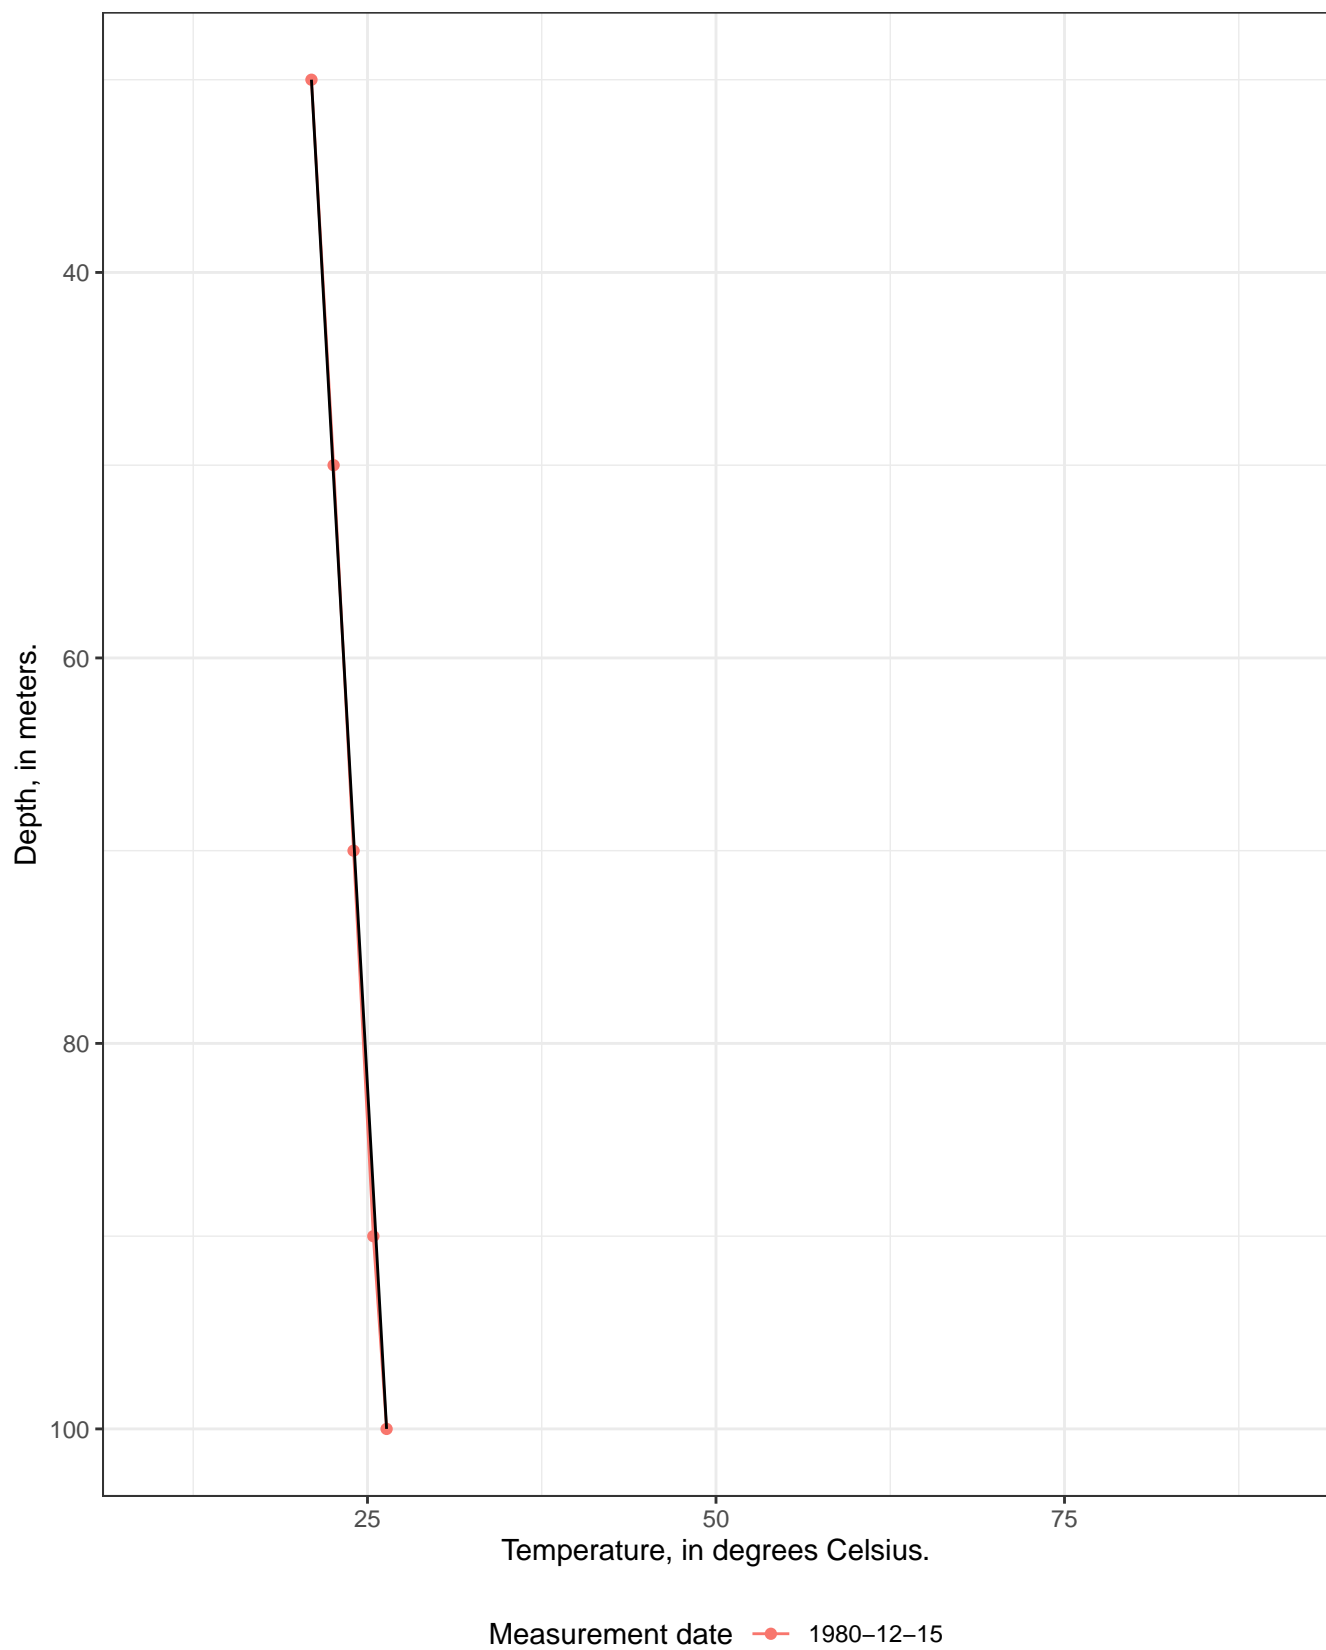

ID: 21 [Amax\_80–268]

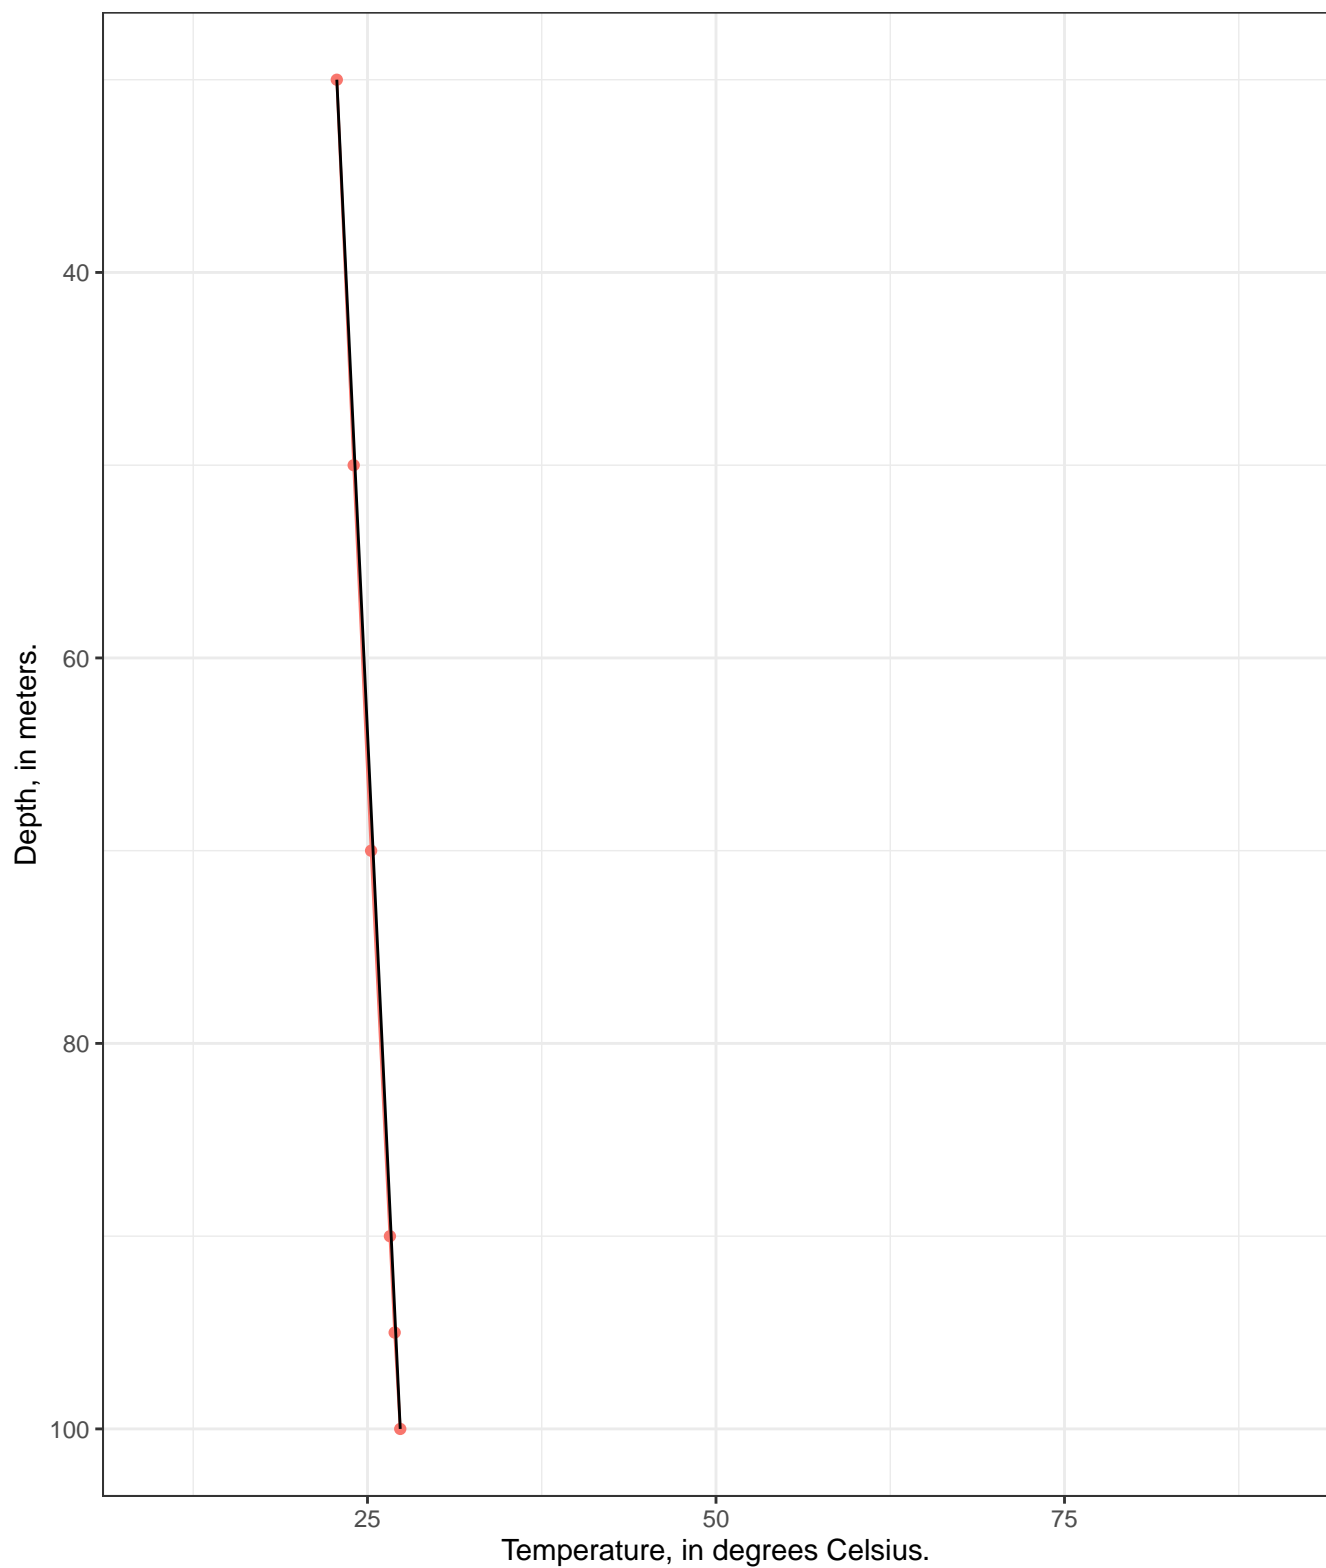

Measurement date 1980-12-15

ID: 22 [Amax\_80-269]

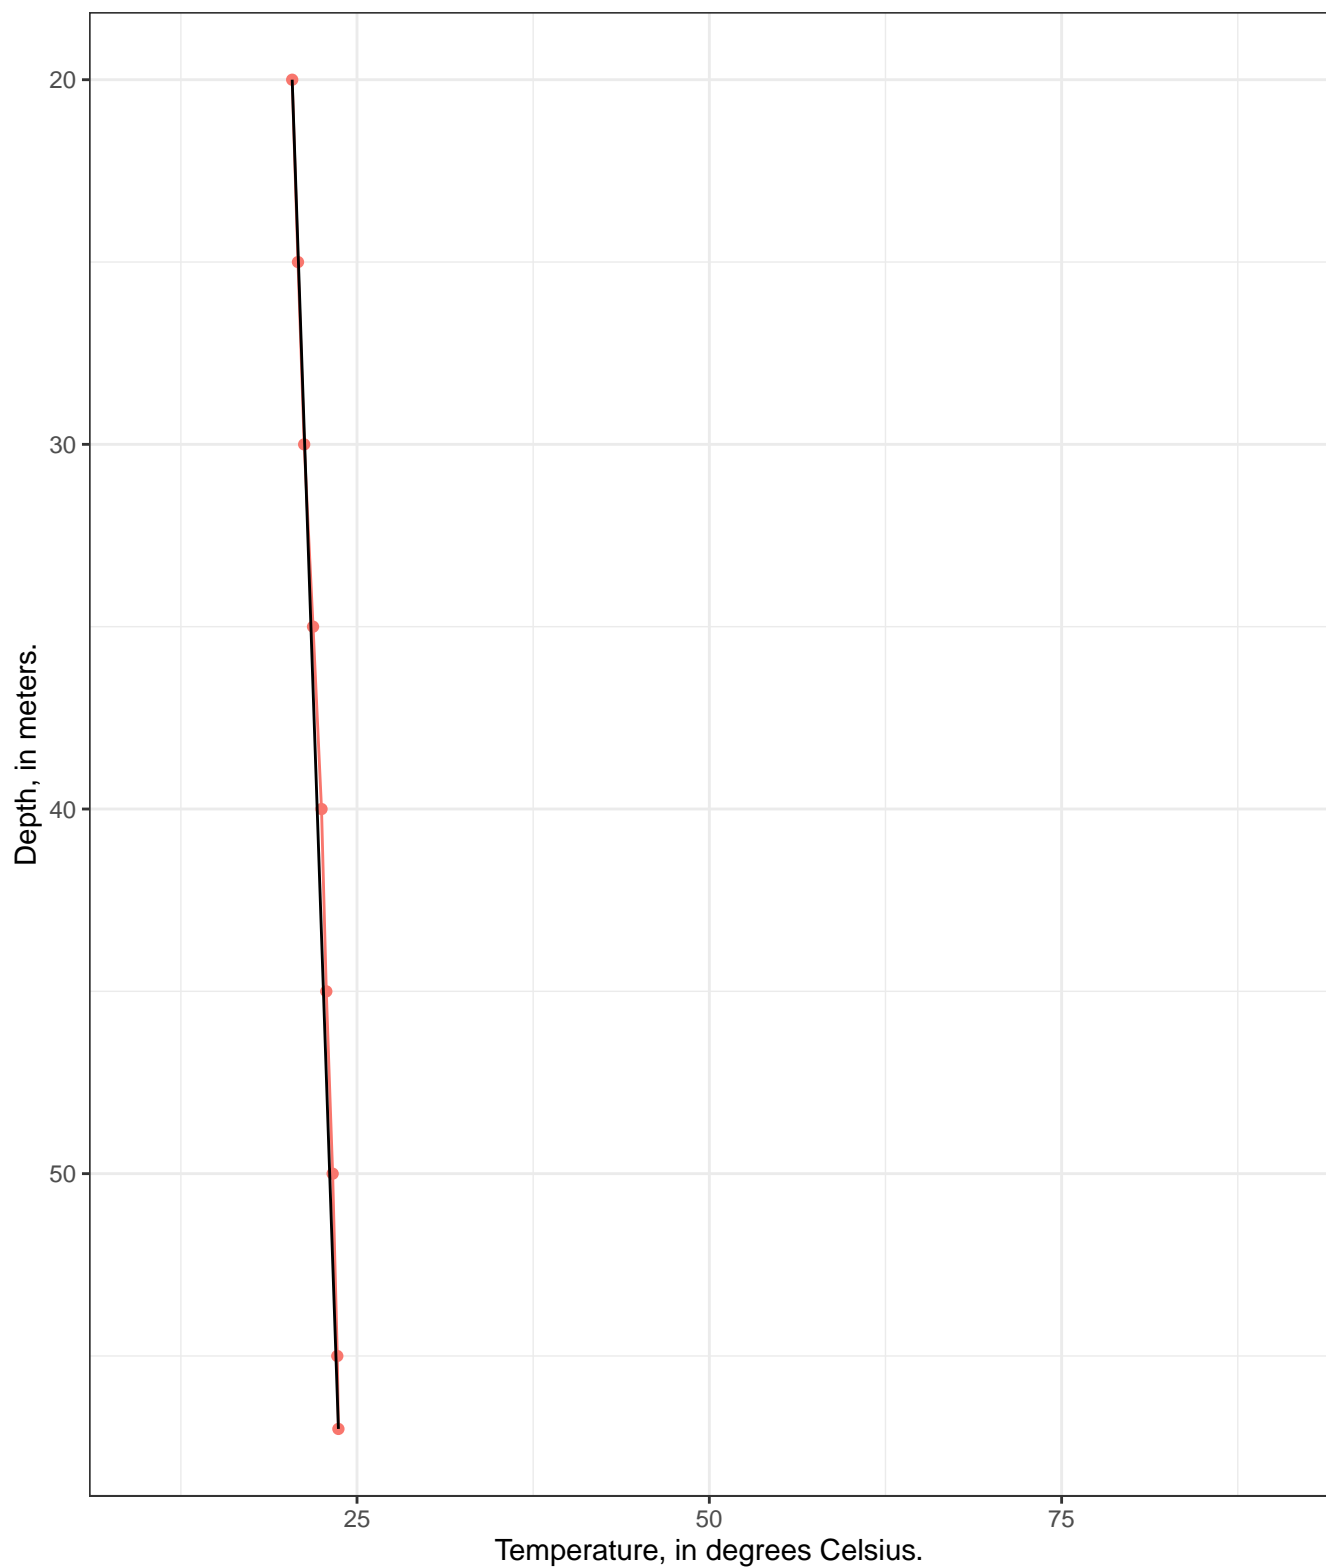

Measurement date 1980-12-15

ID: 23 [Amax\_80–270]

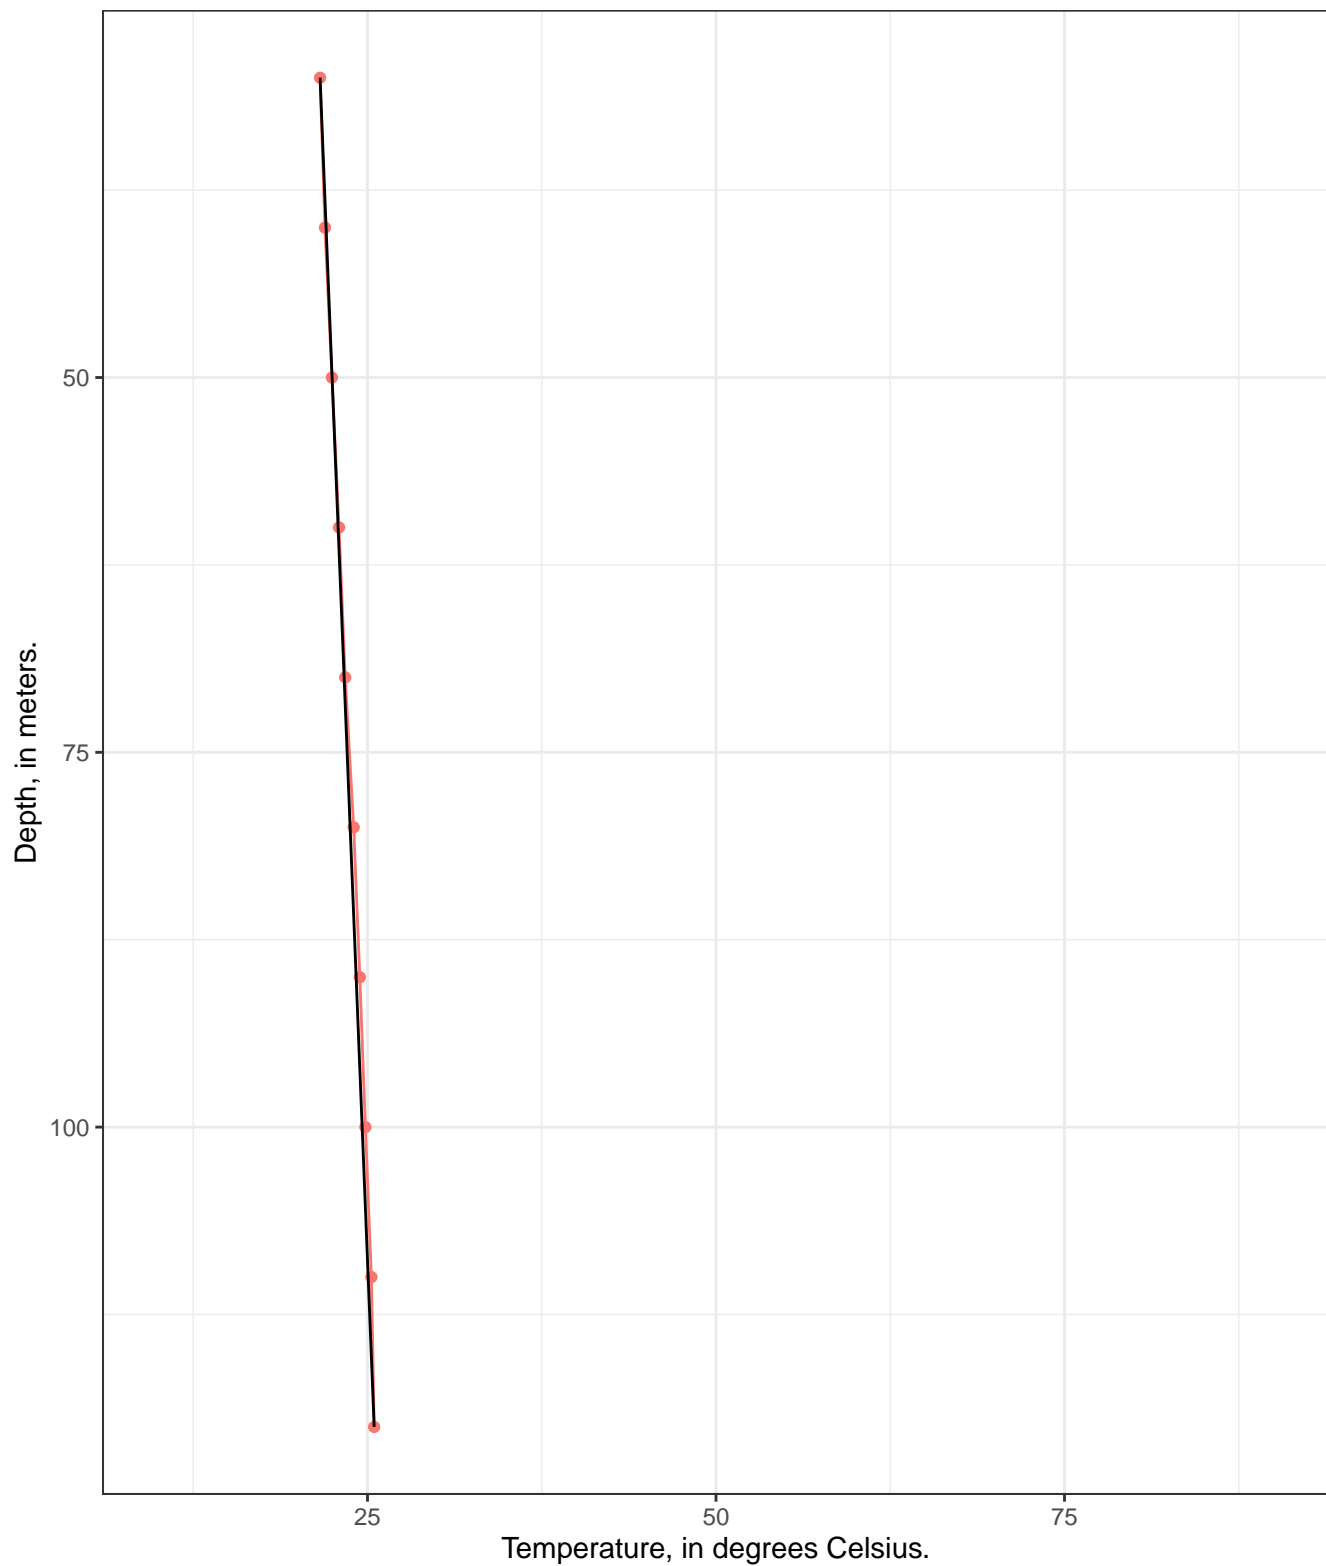

Measurement date 1980-12-16



ID: 24 [AMAX\_80–271]

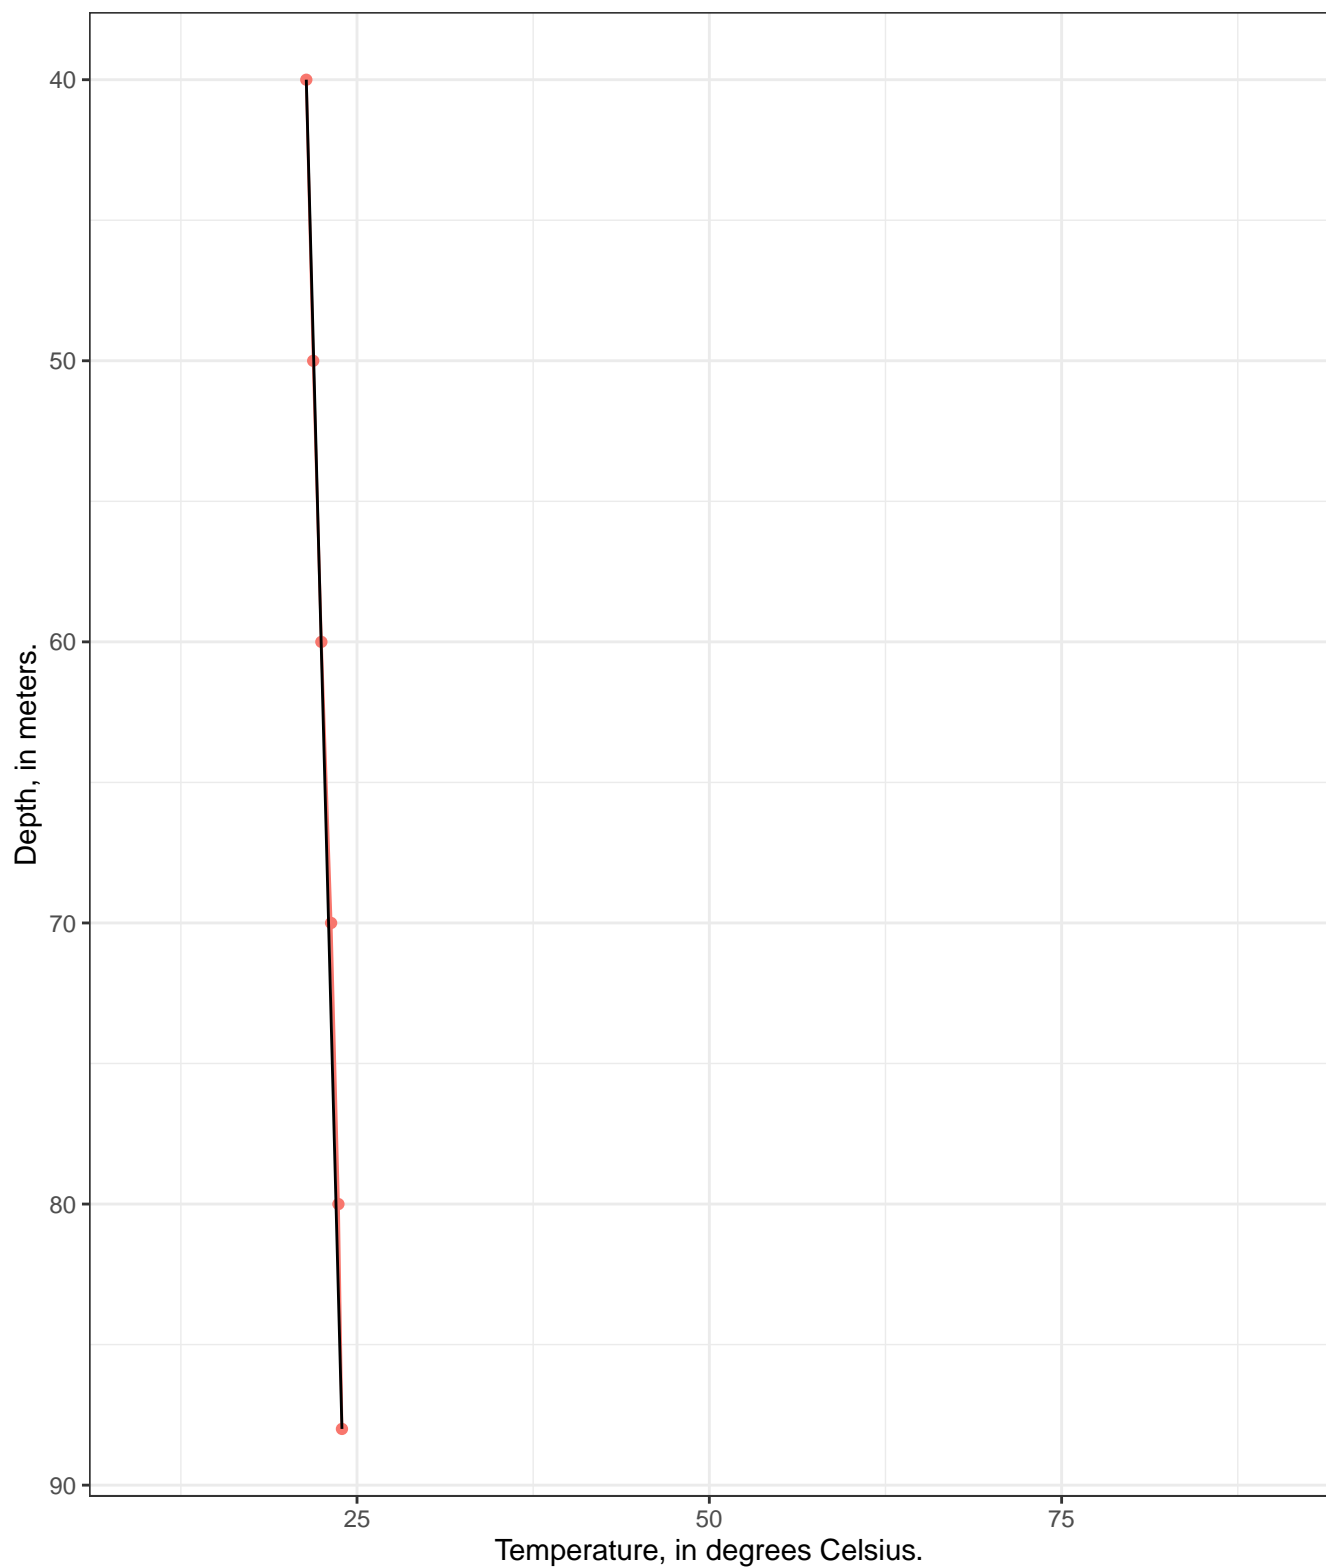

Measurement date 1980-12-15

ID: 25 [Amax\_80-272]

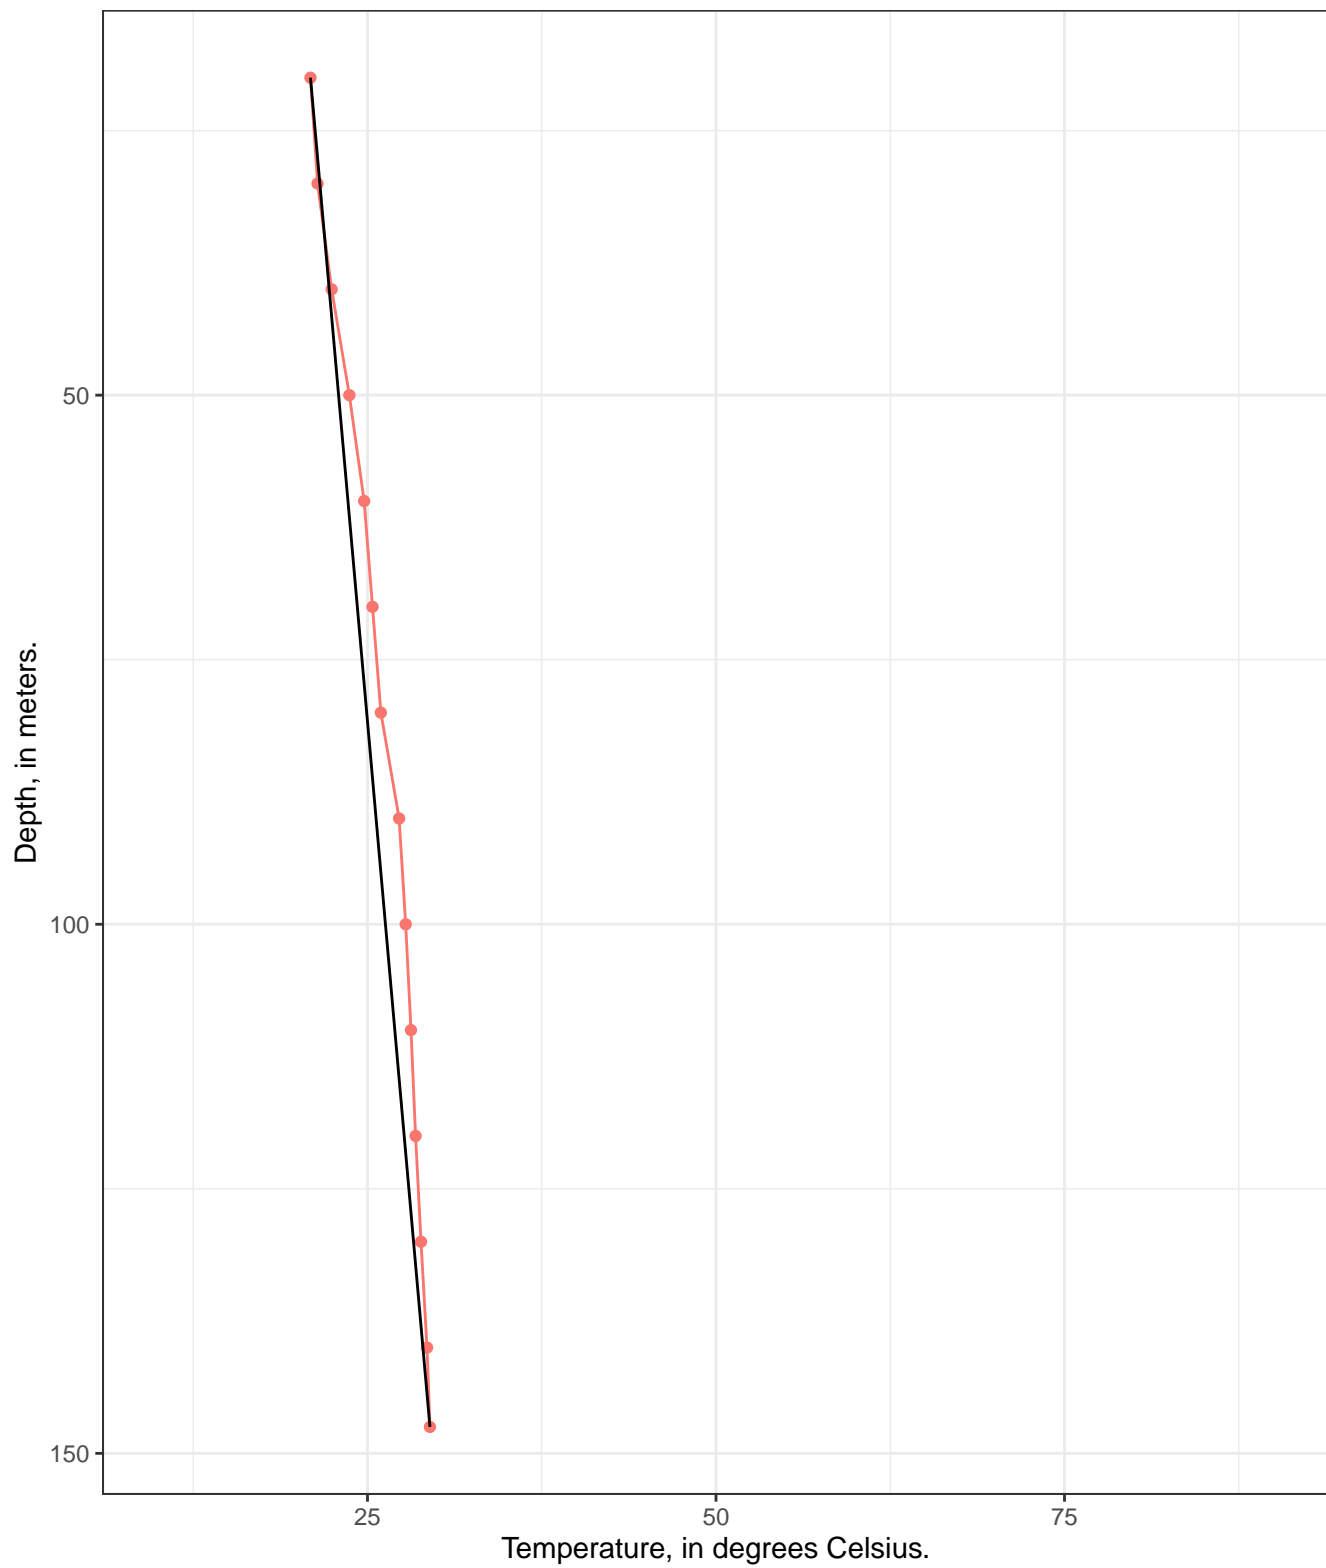

ID: 26 [Amax\_80–273]

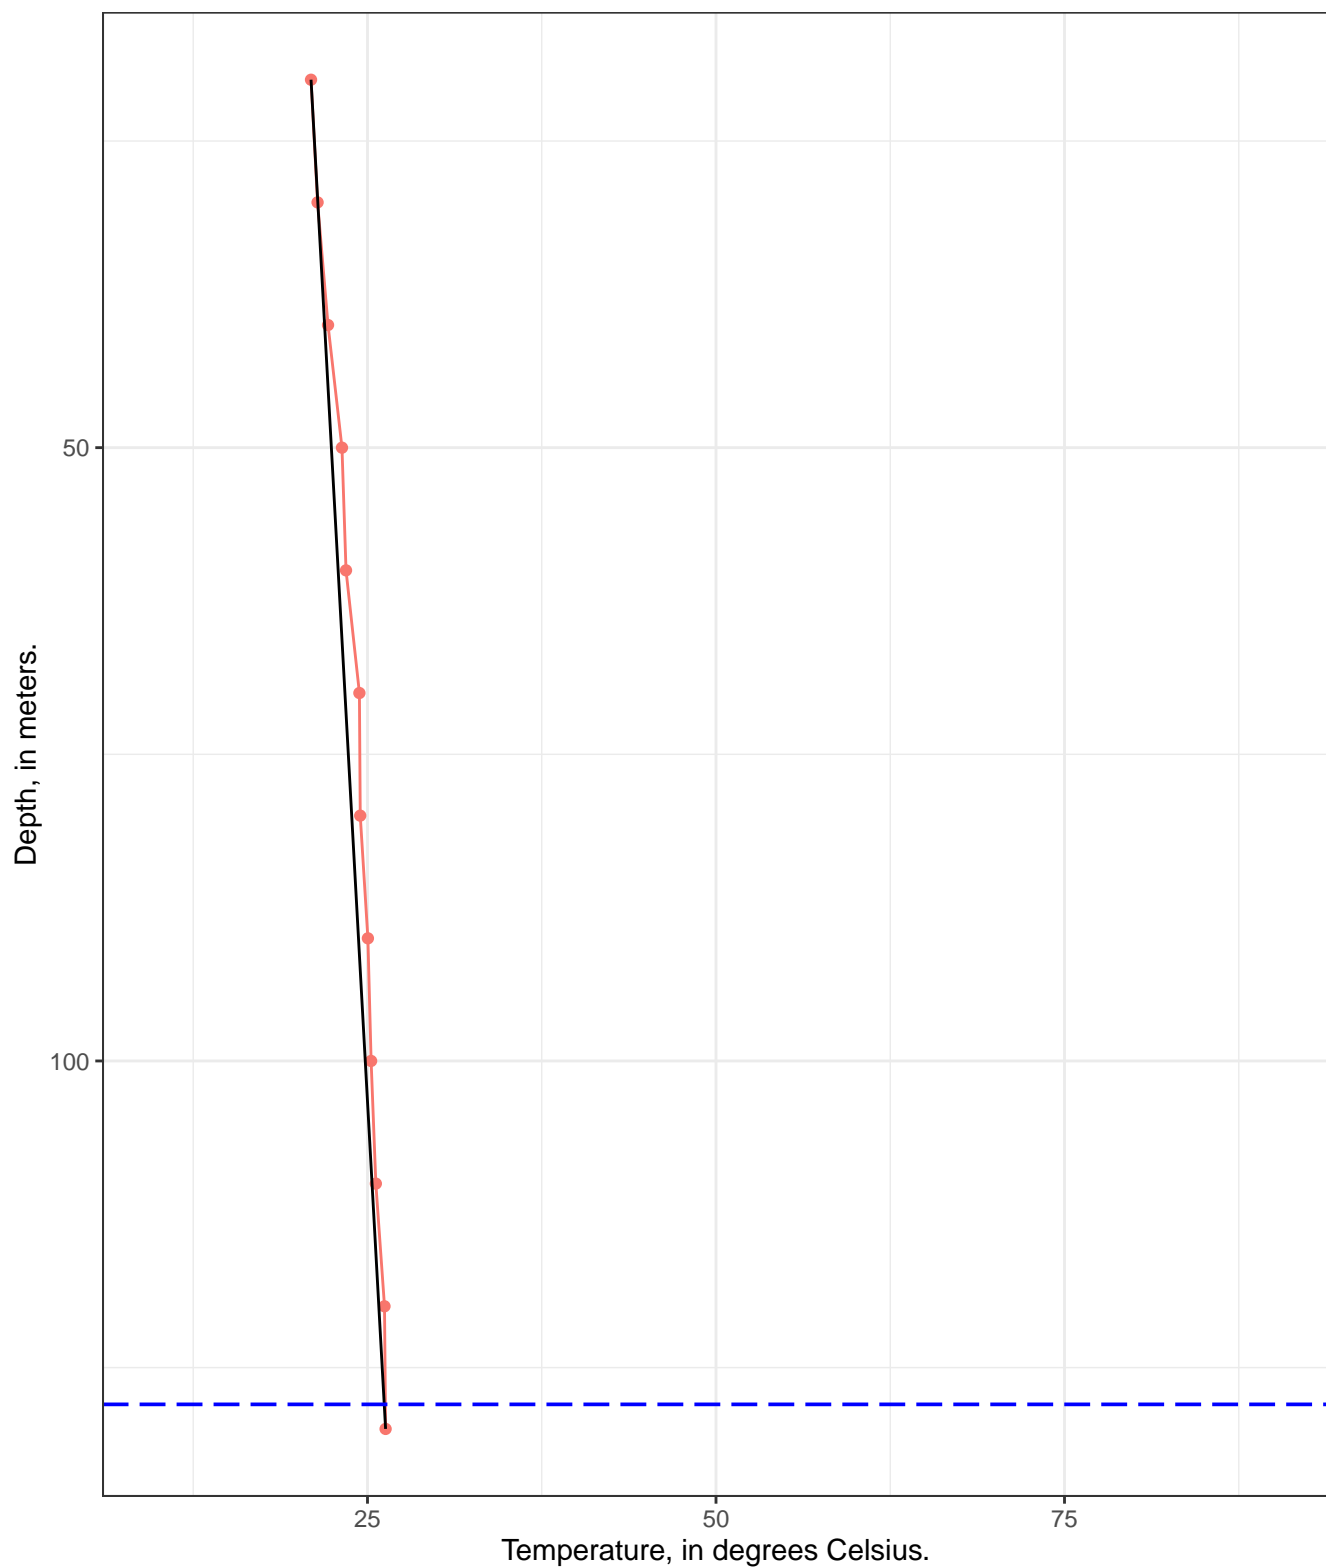

Measurement date 1980-12-15

ID: 27 [AMAX\_80-274]

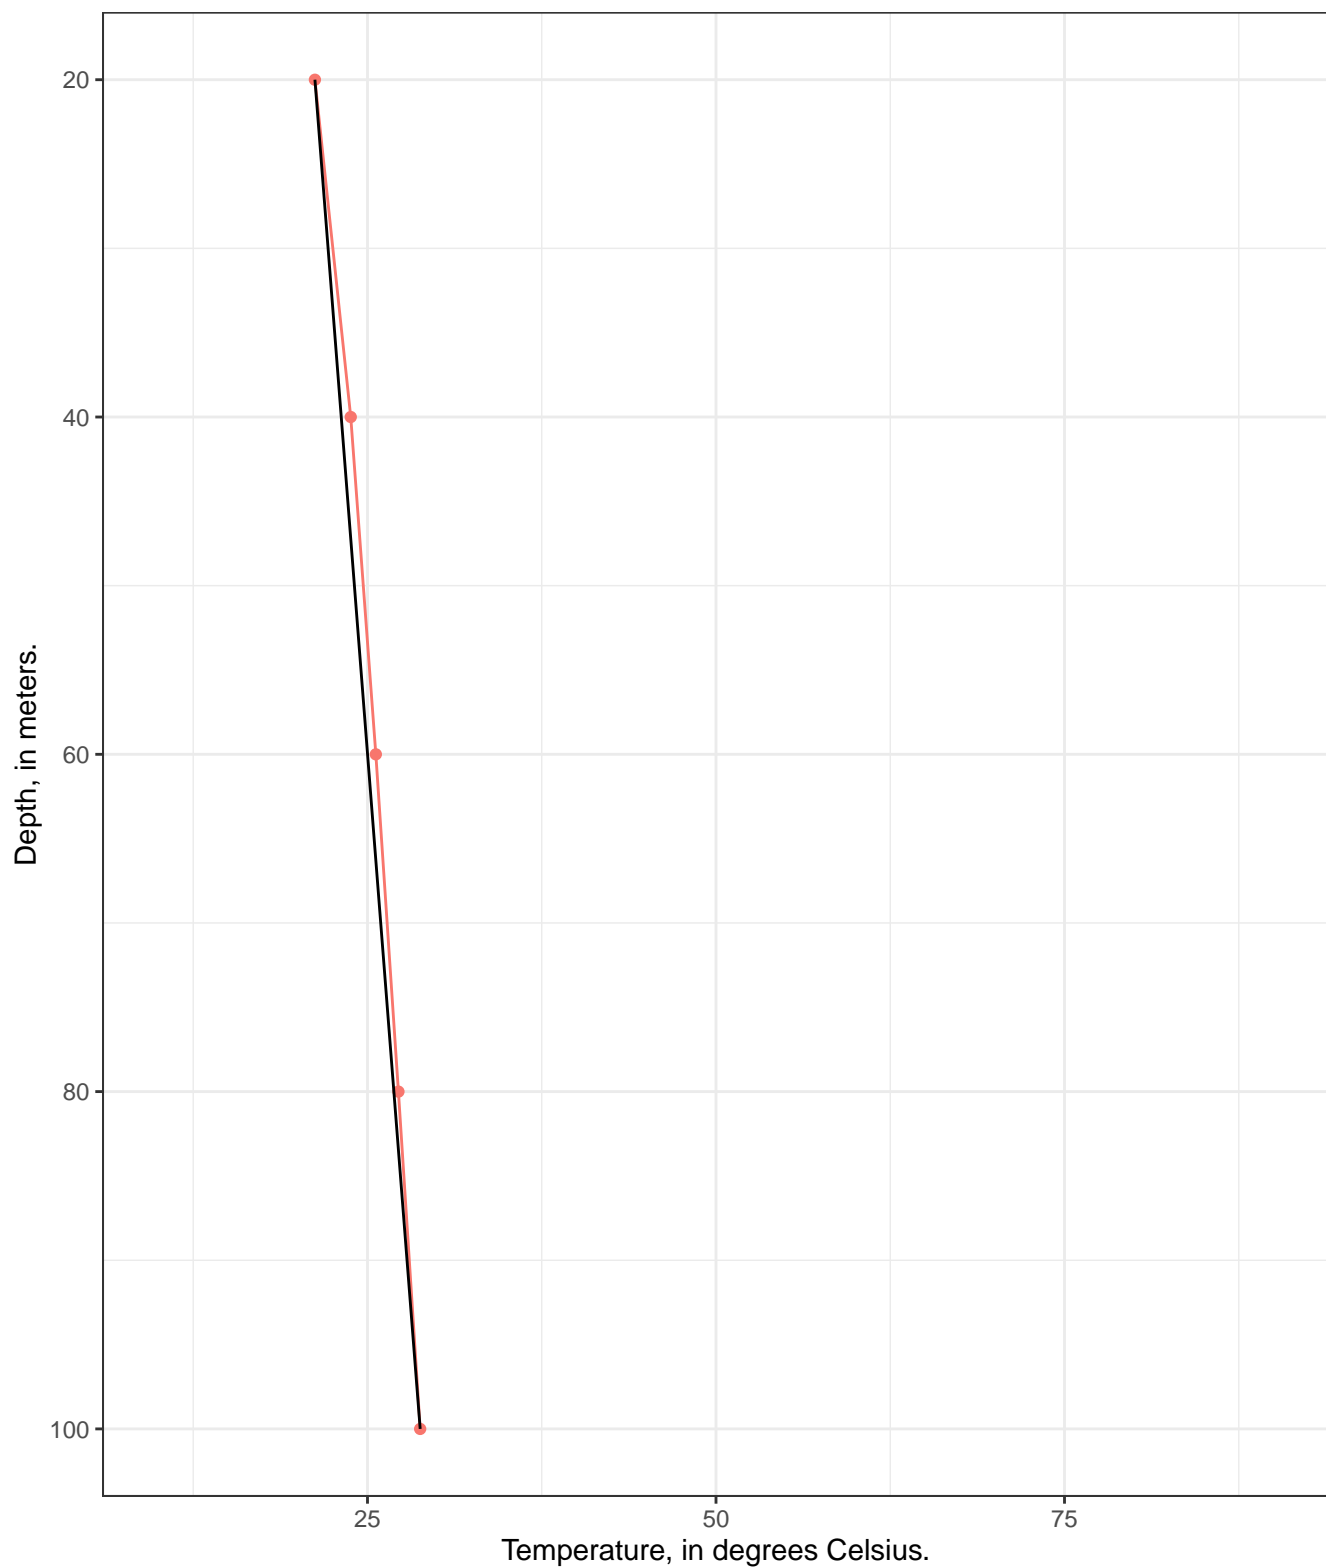

Measurement date 1980-12-15

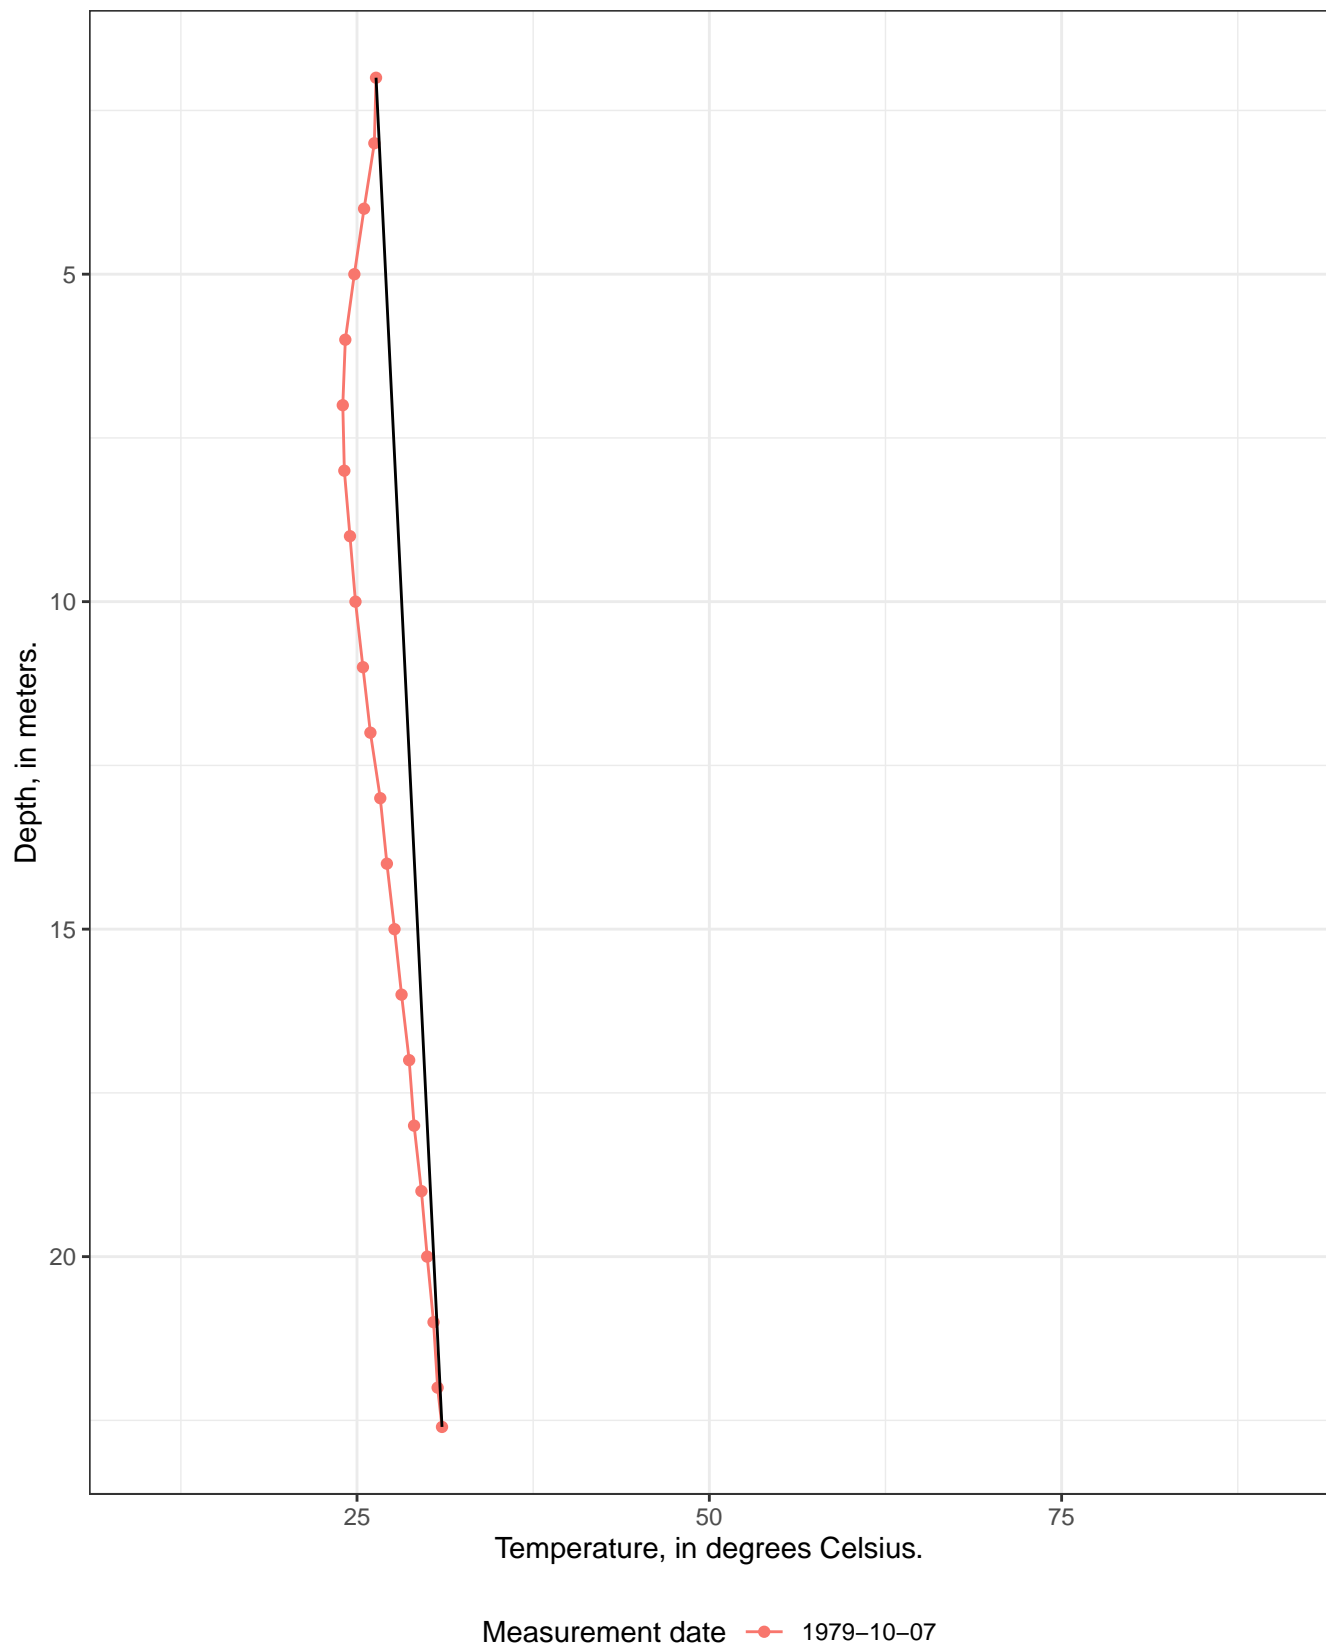

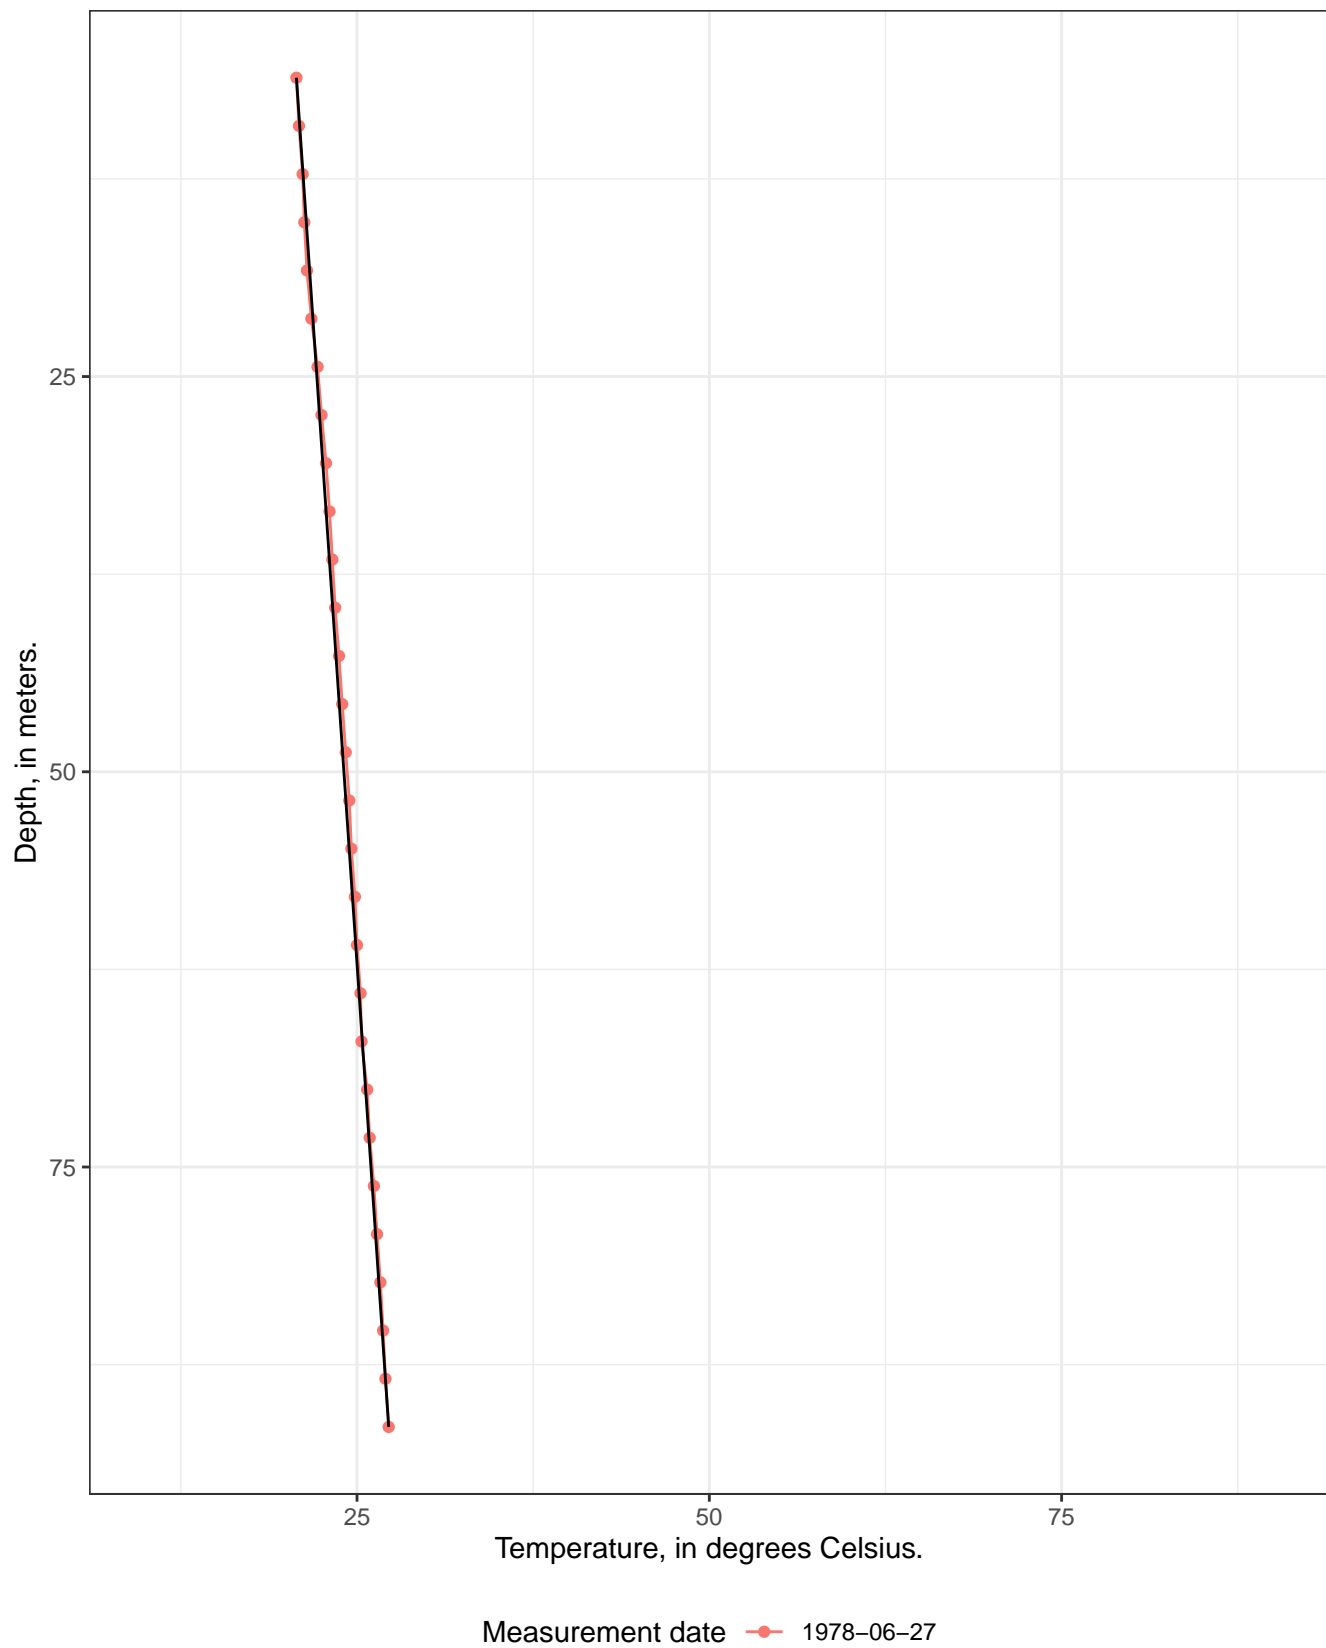

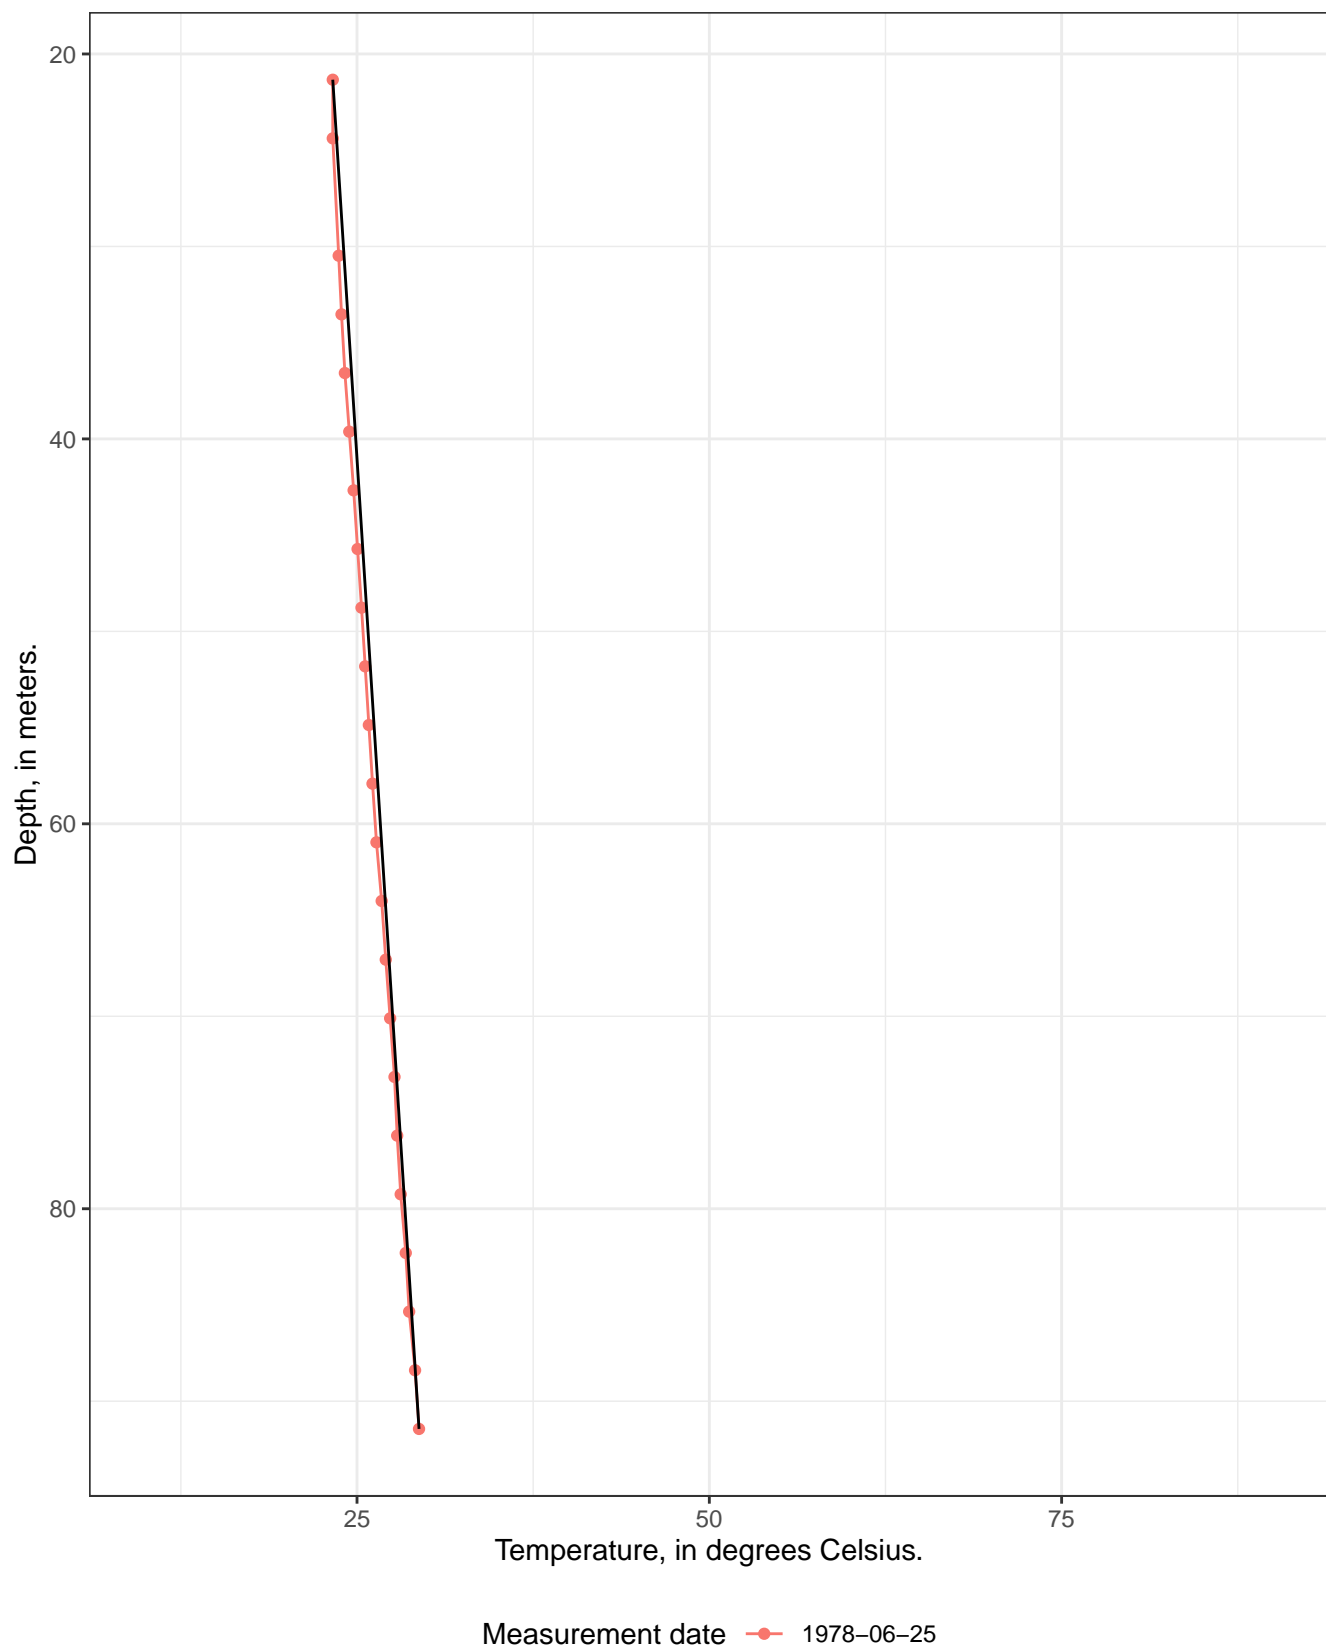

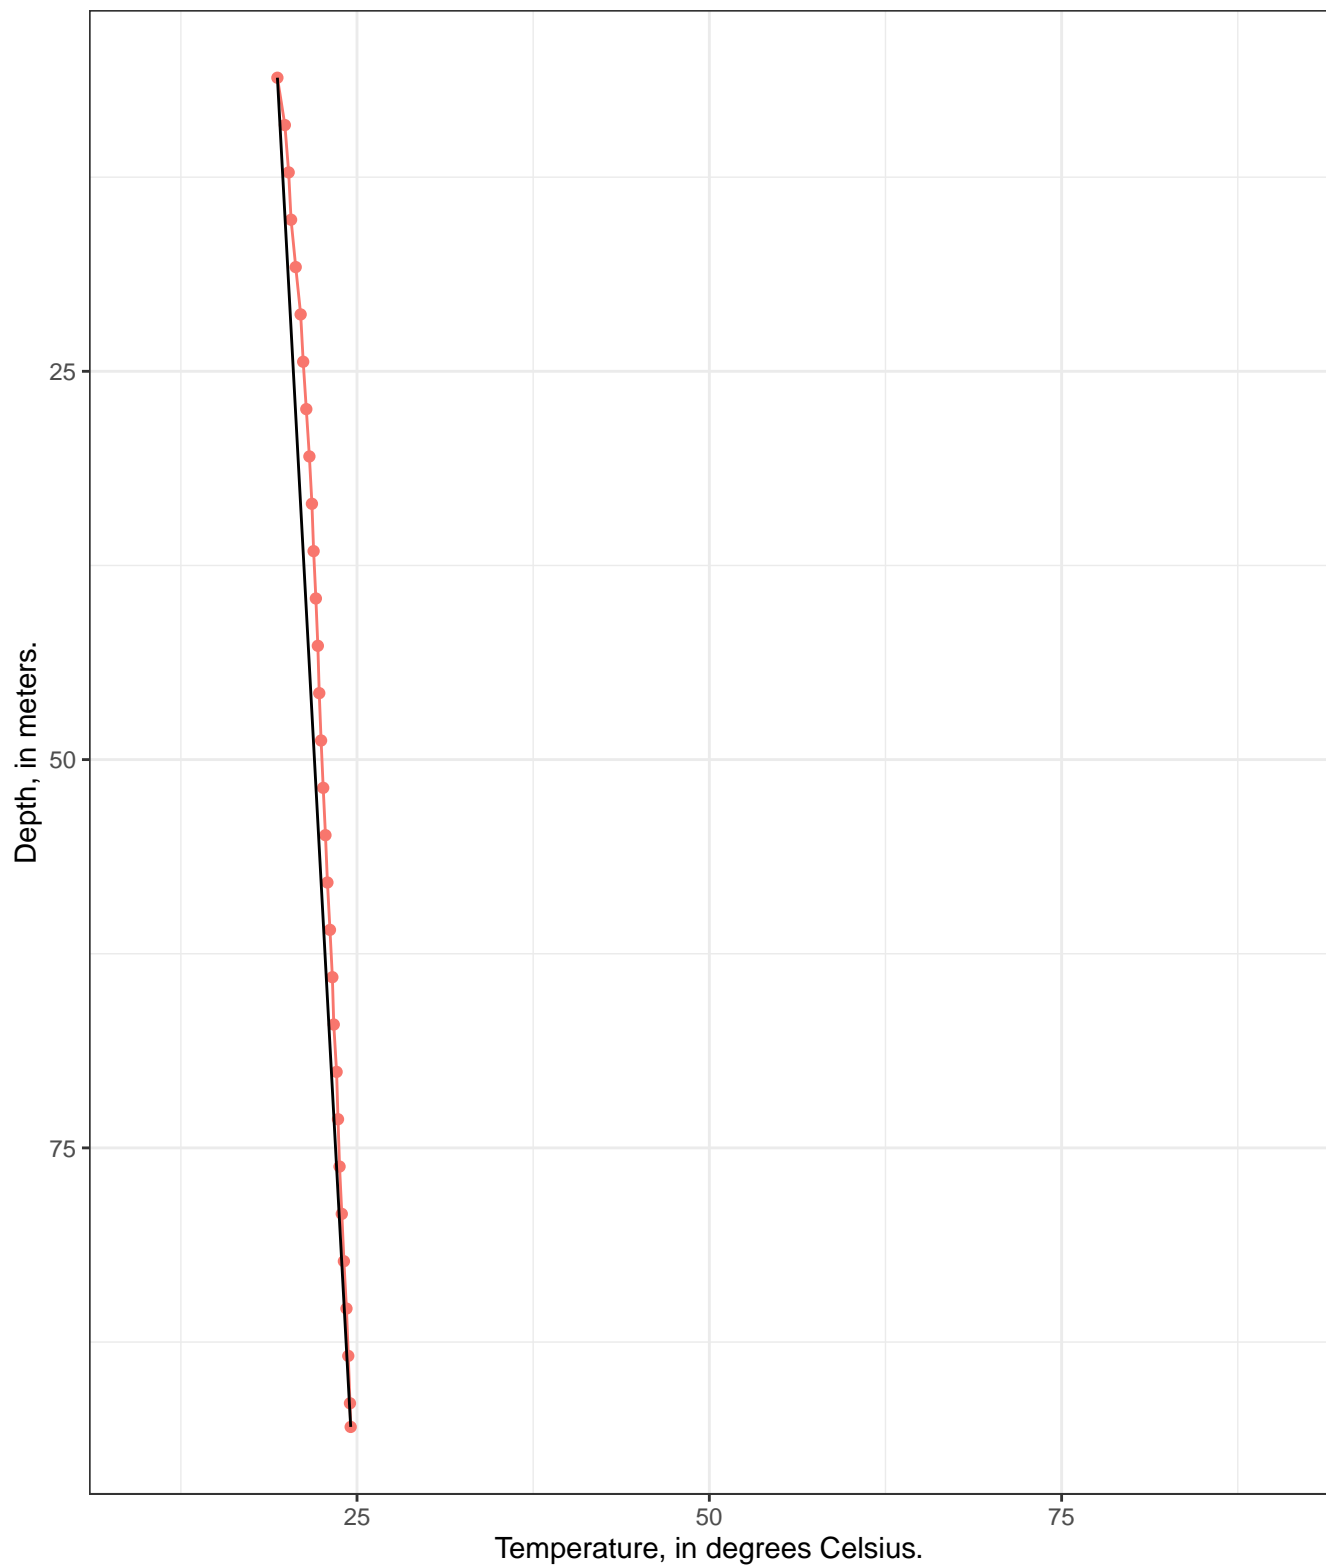



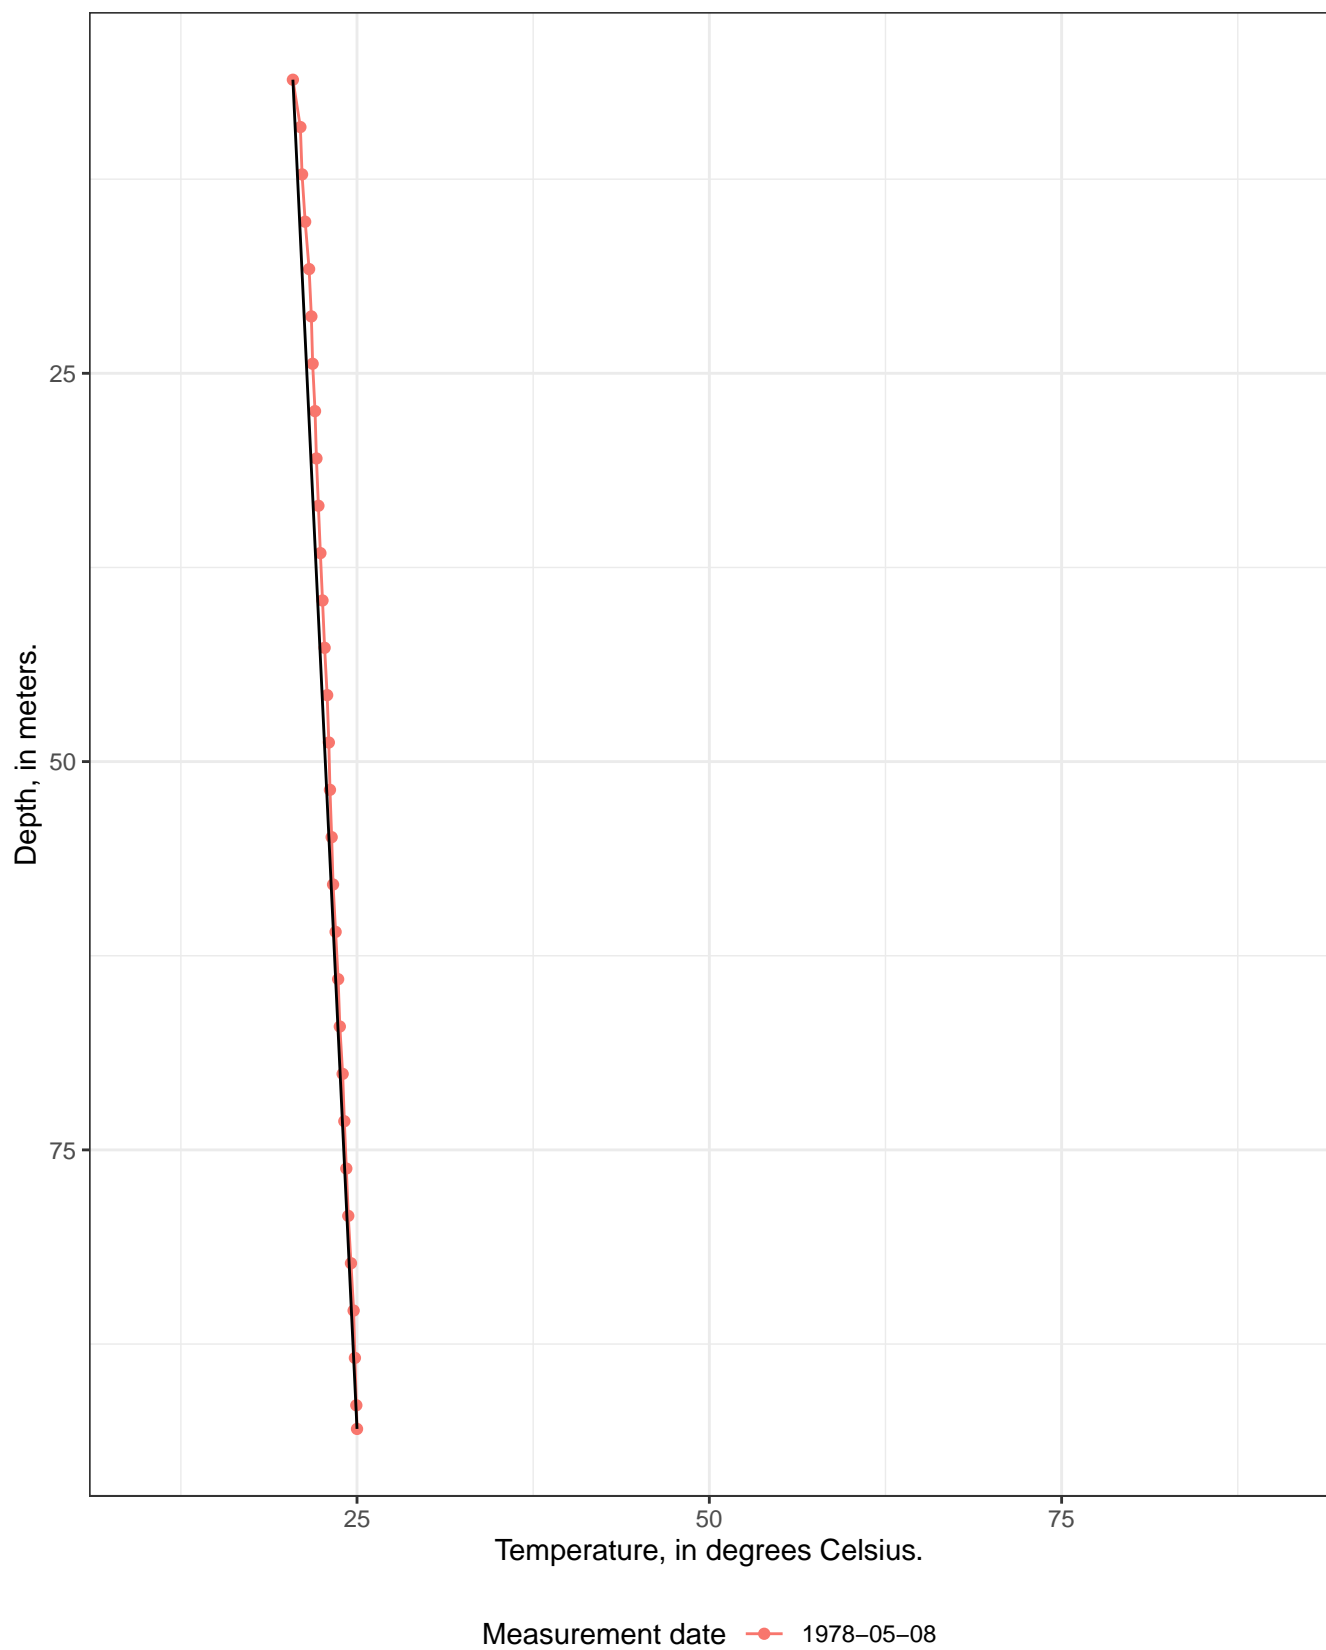

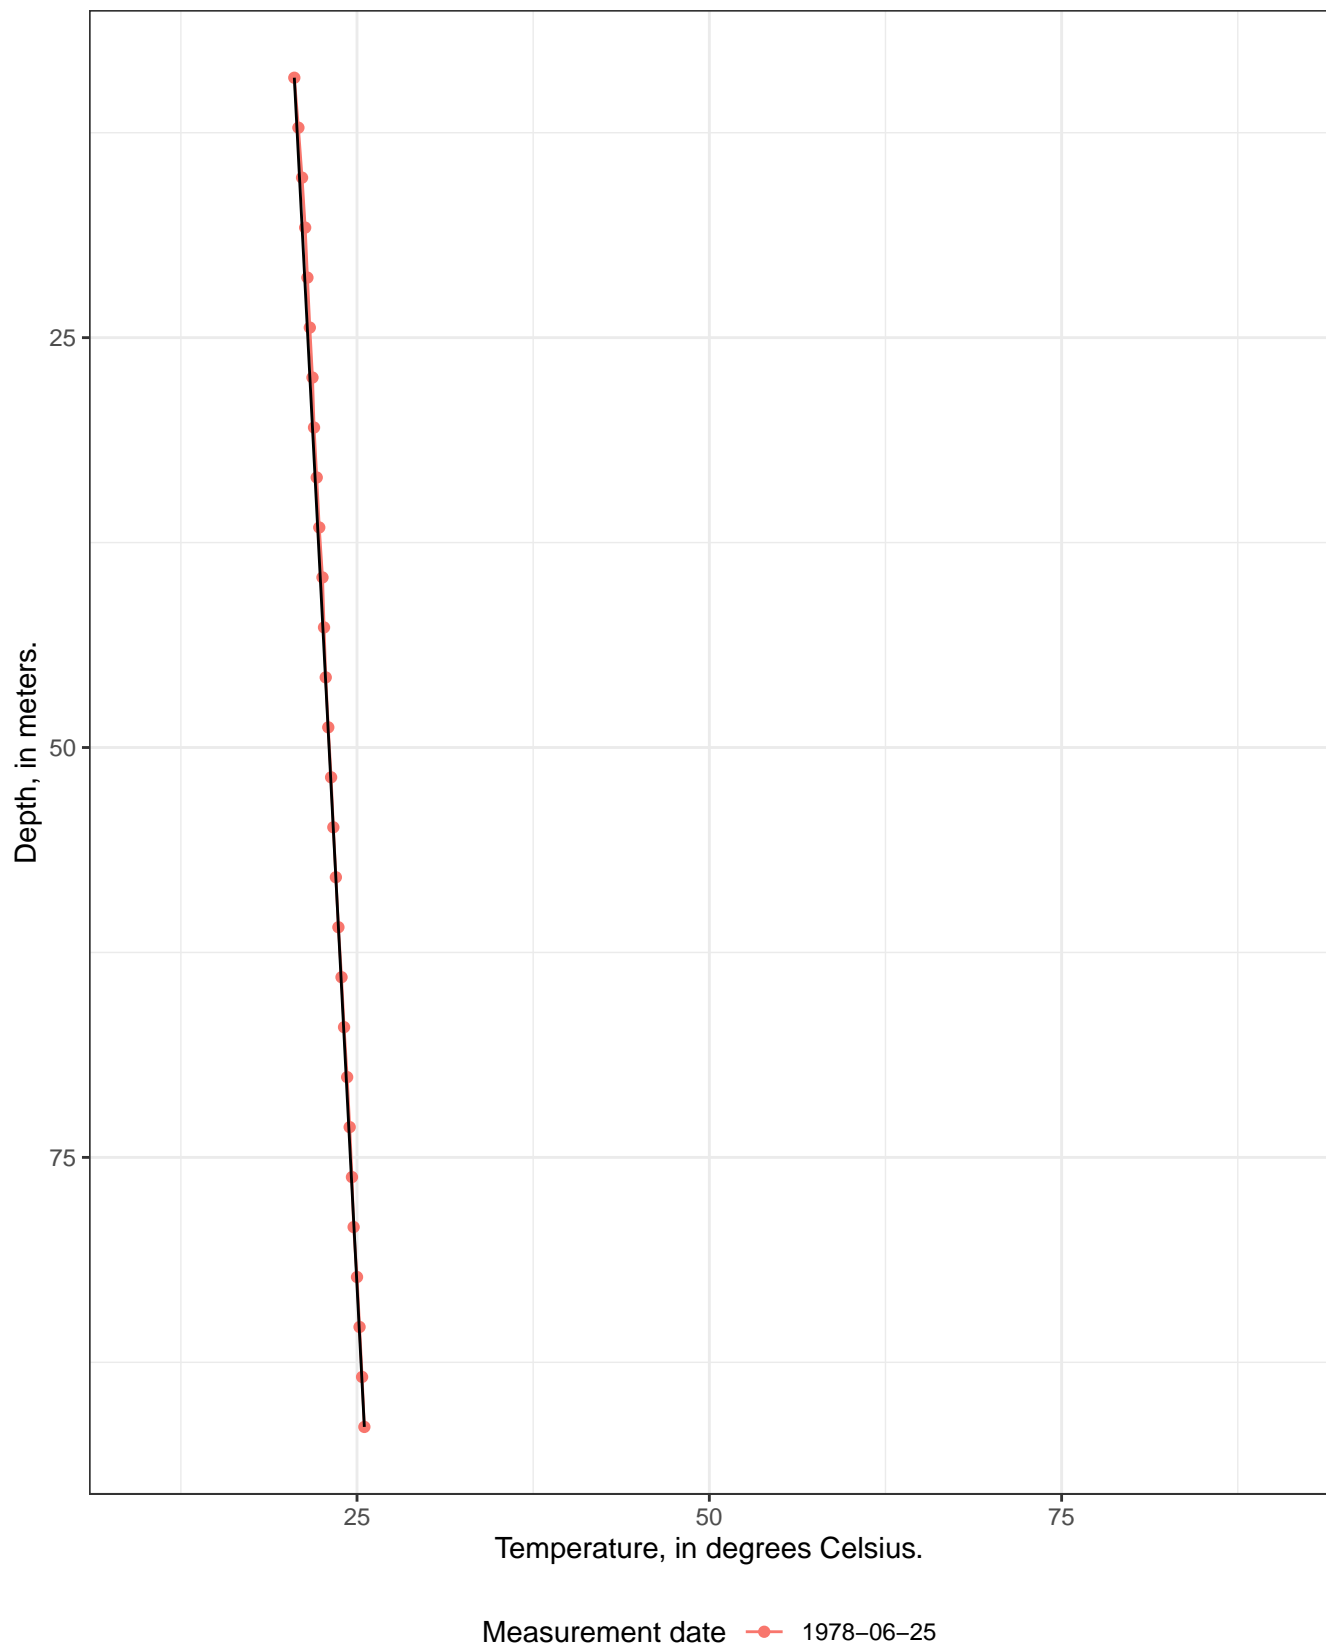

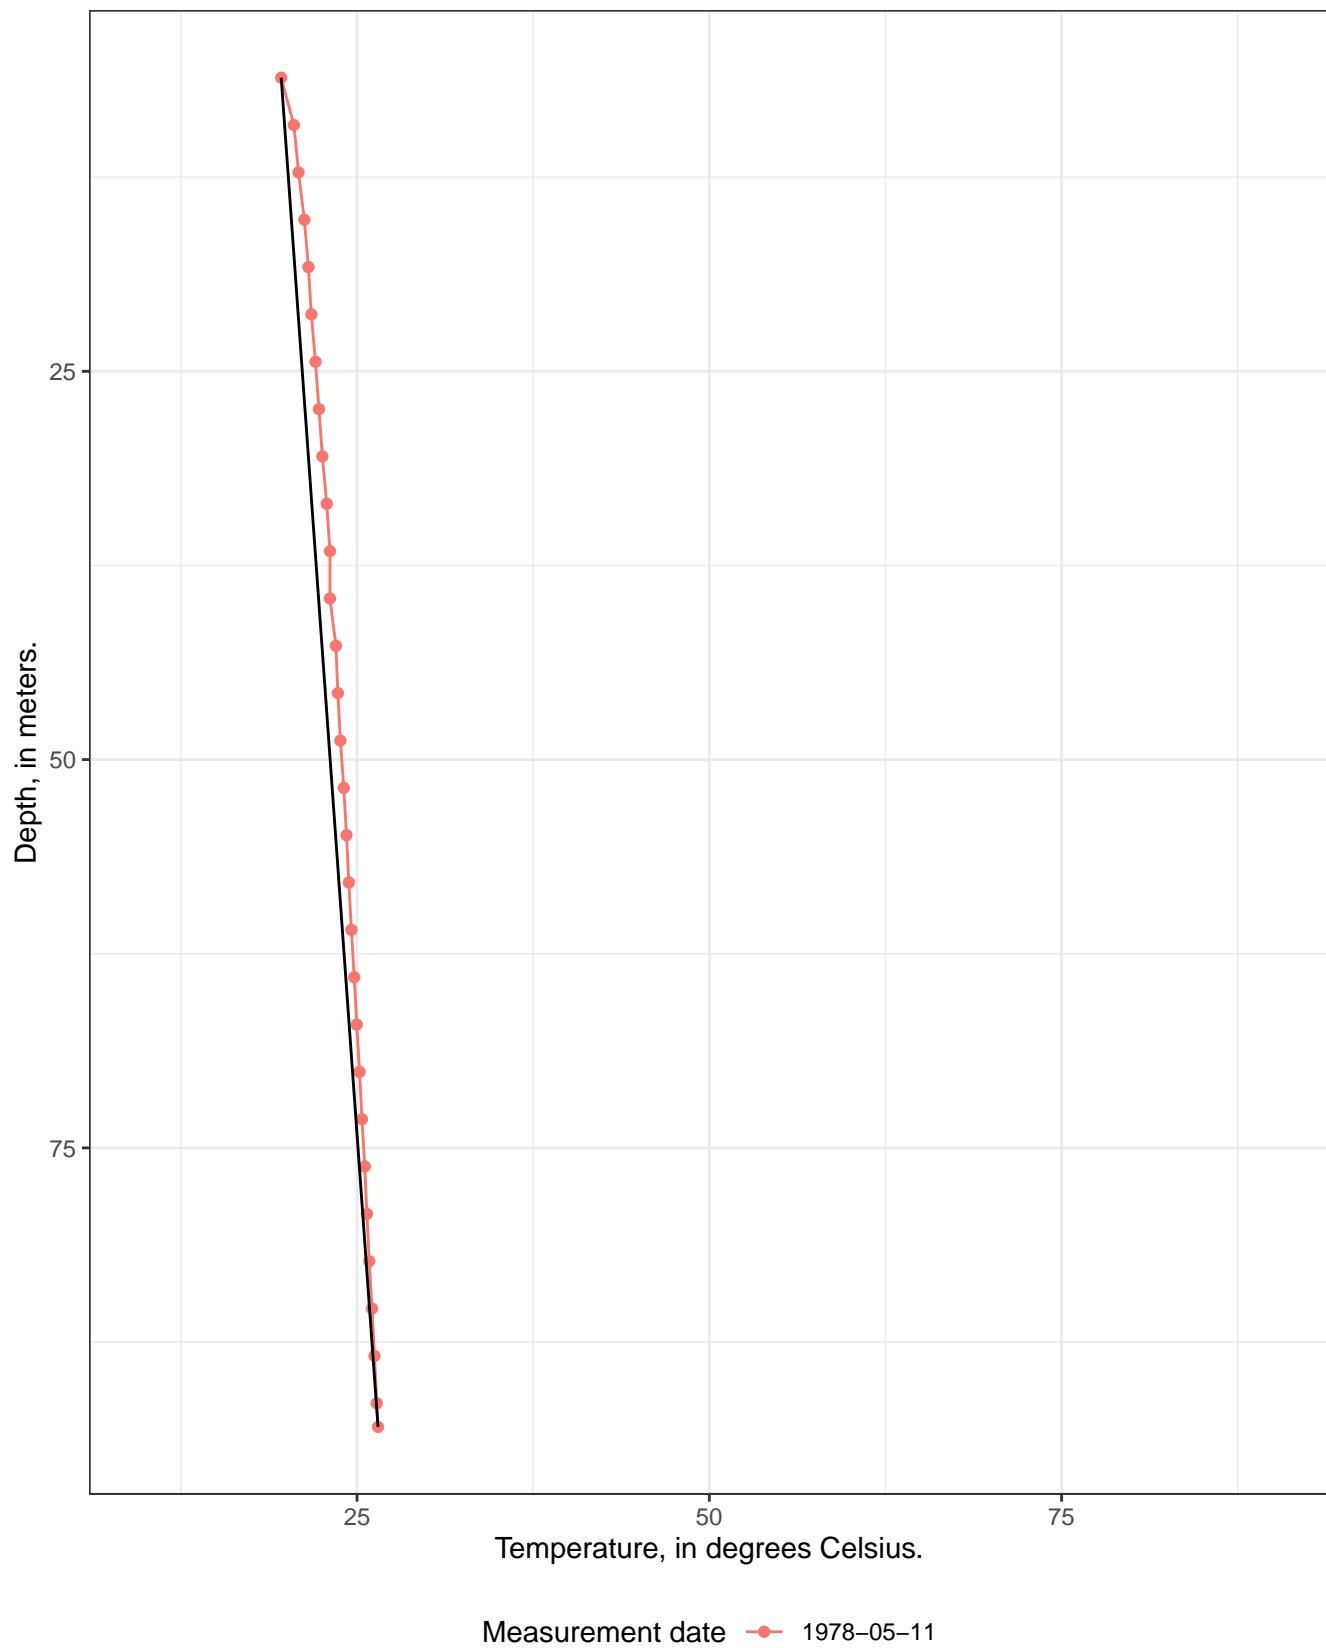

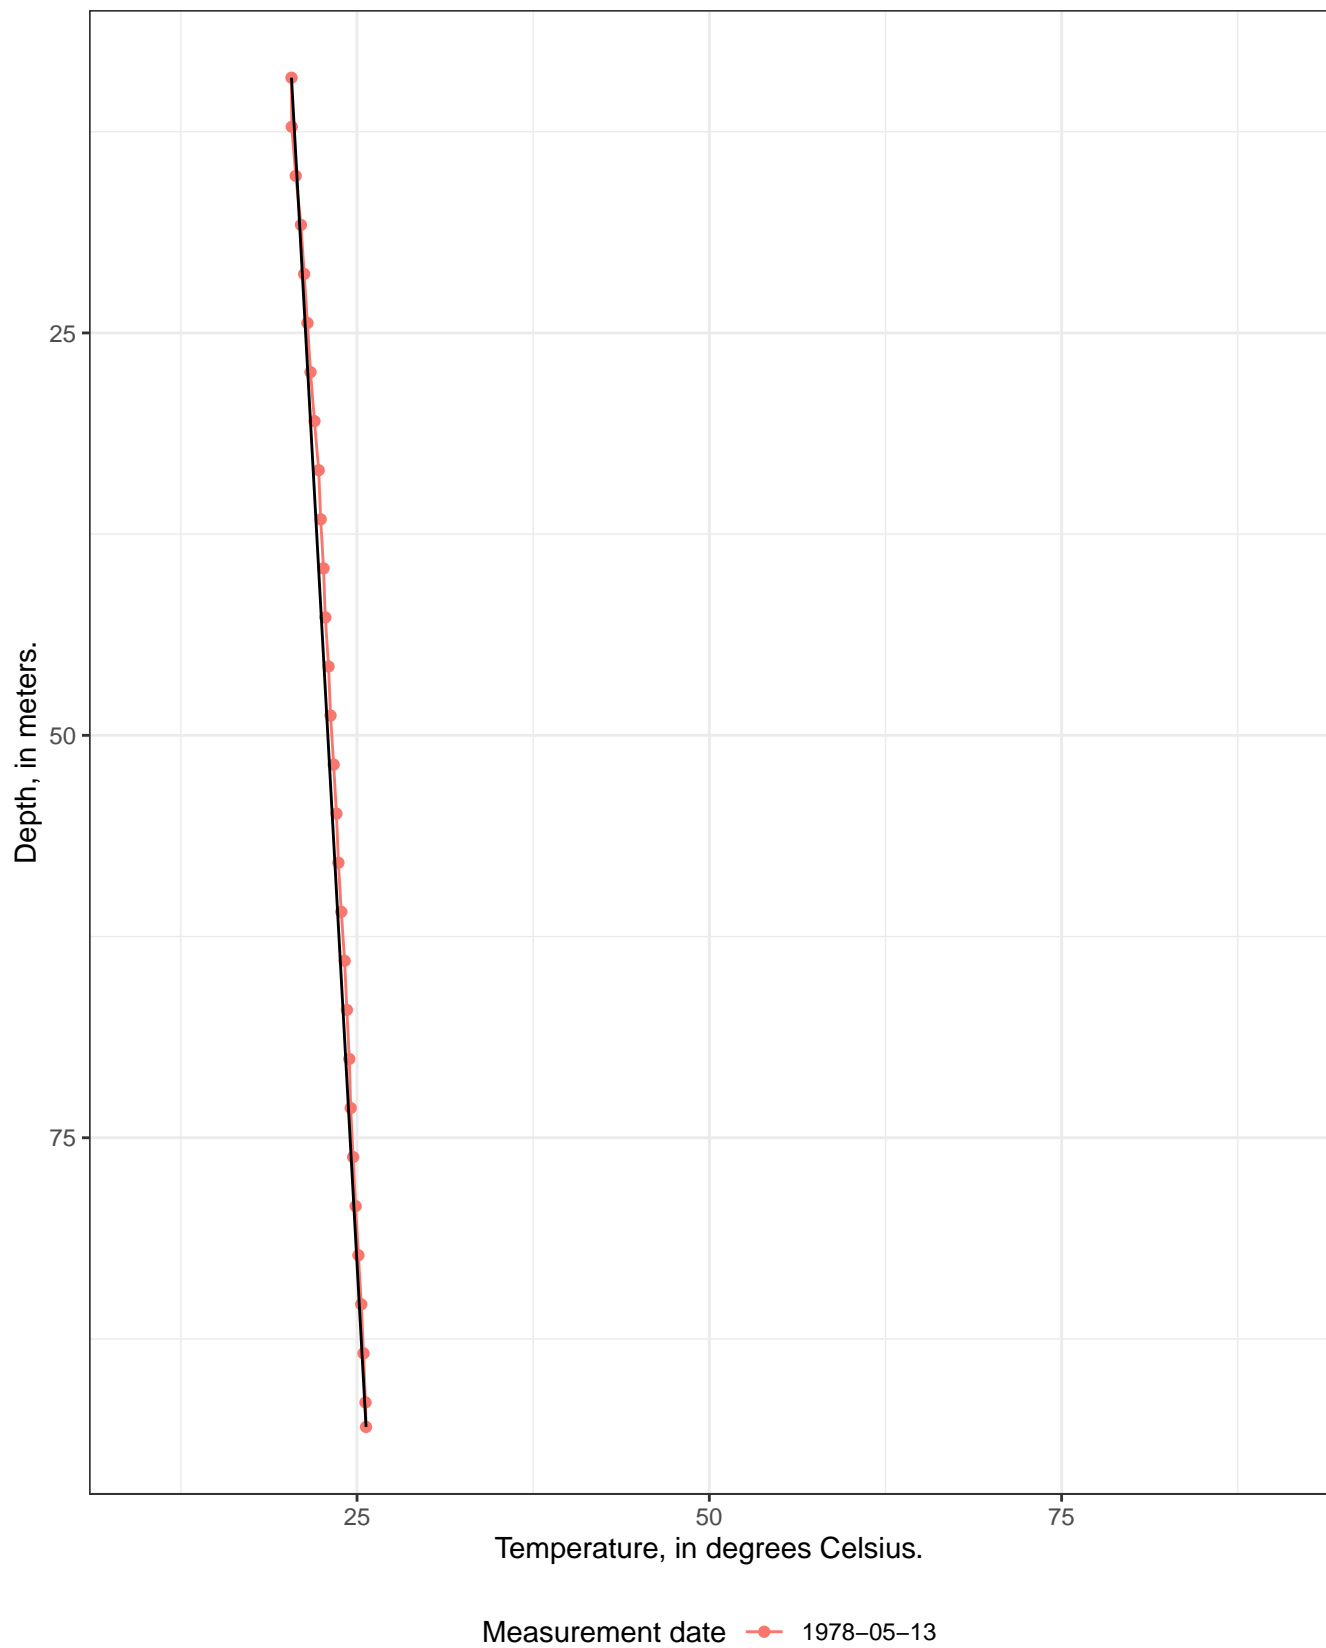

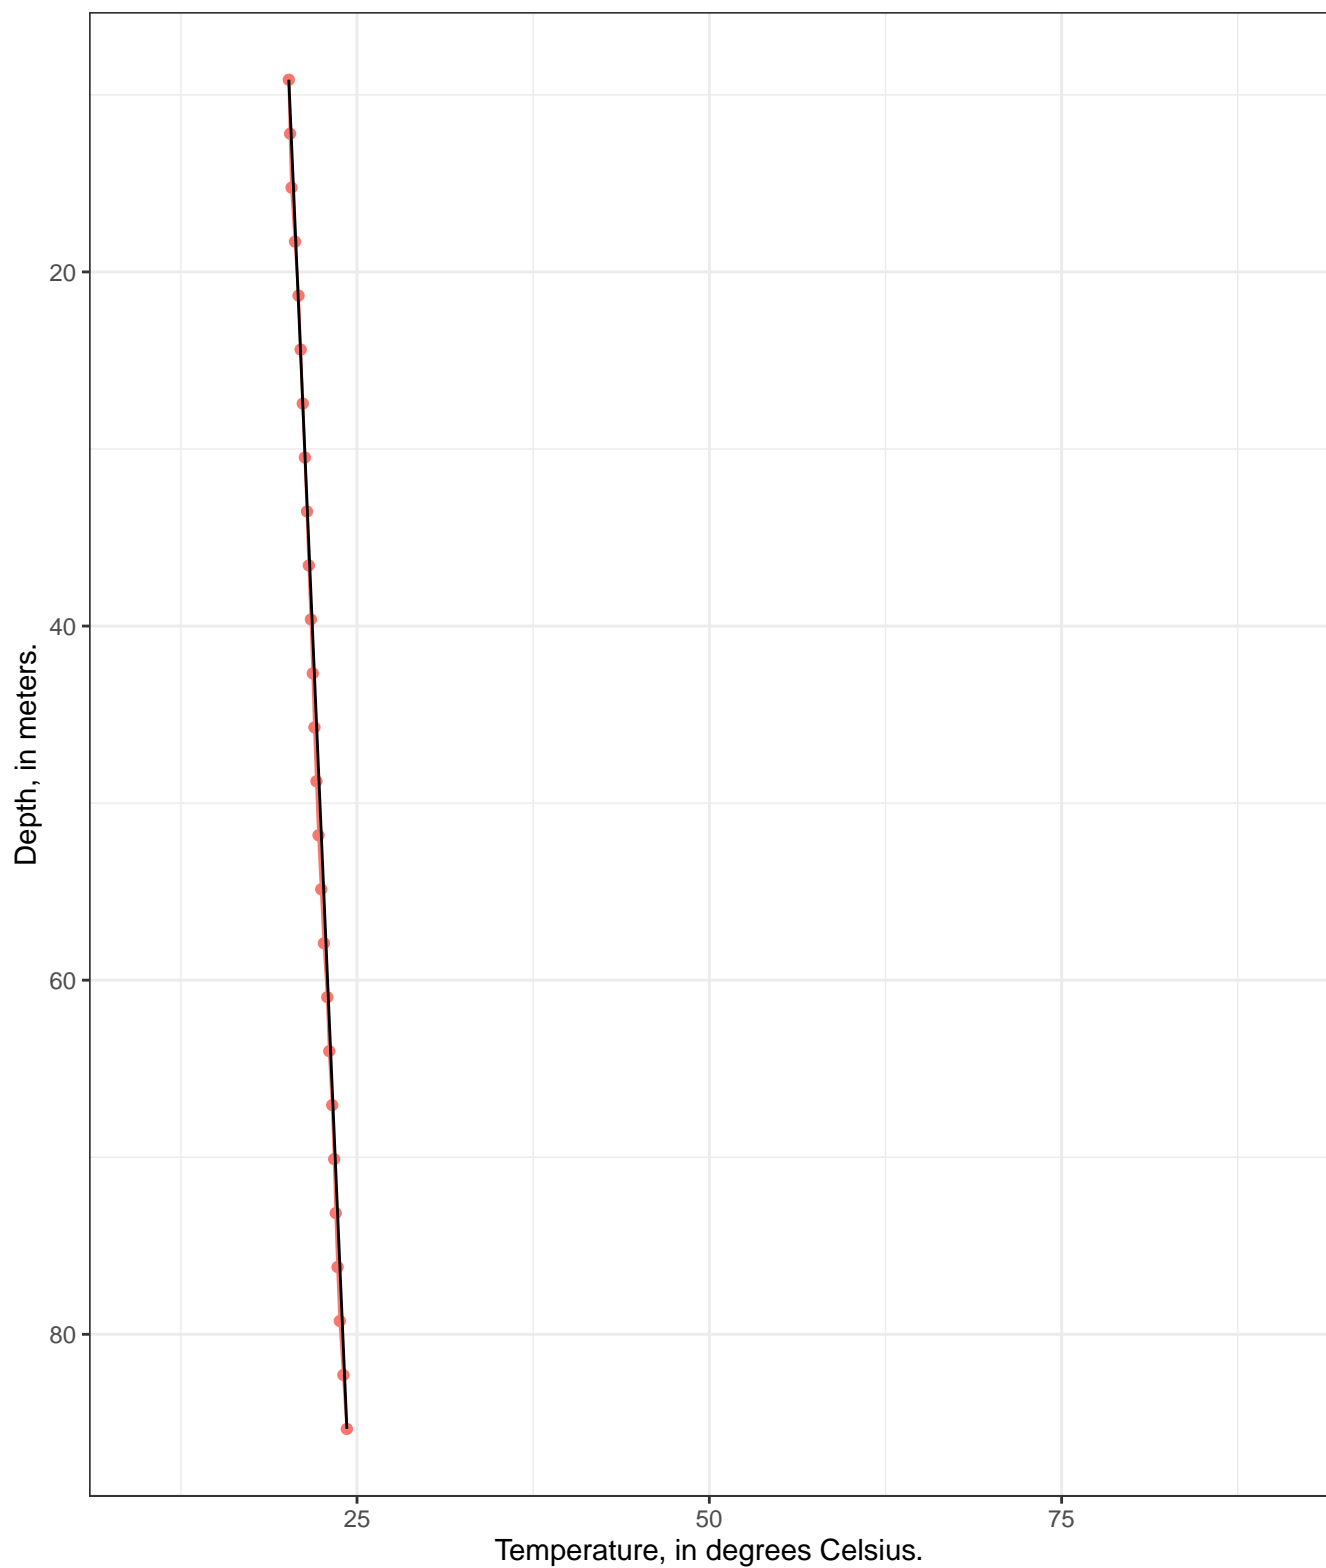

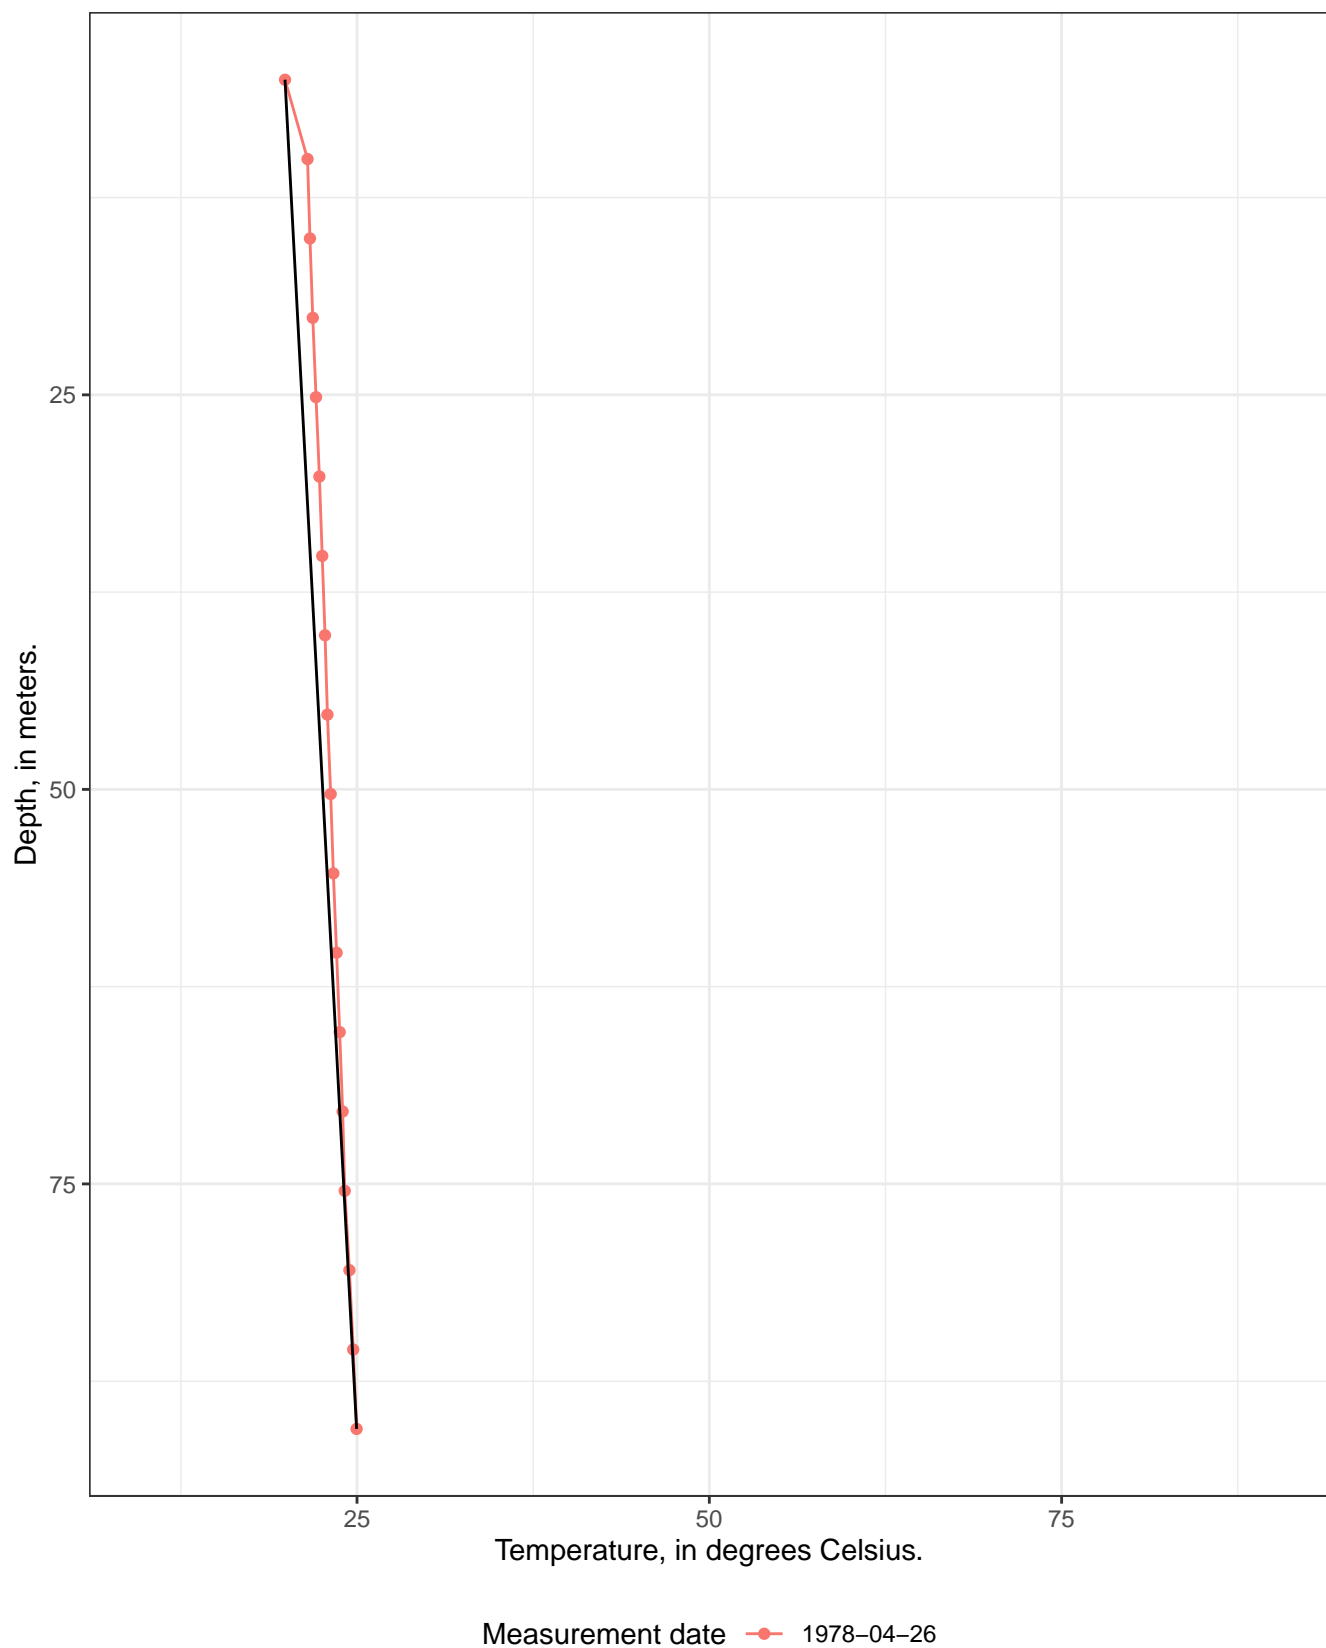

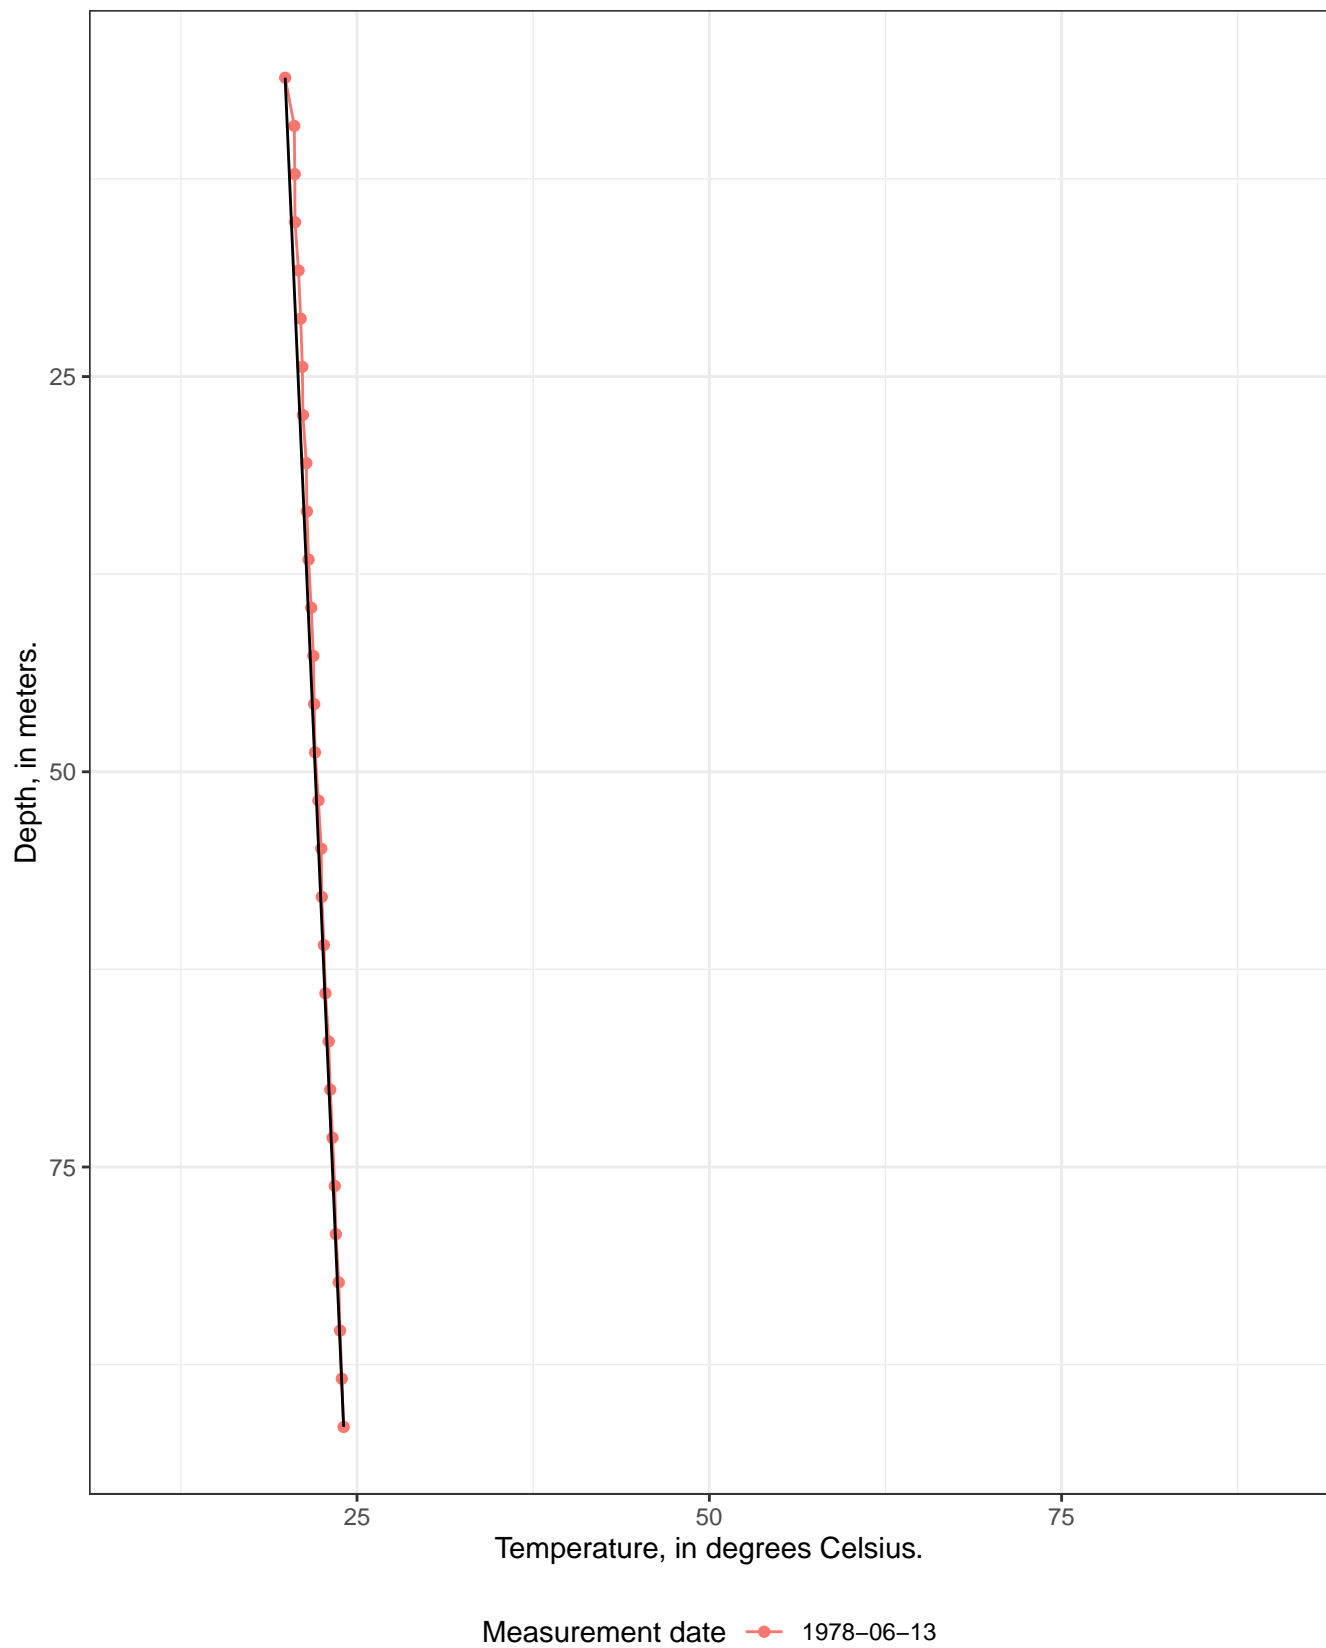

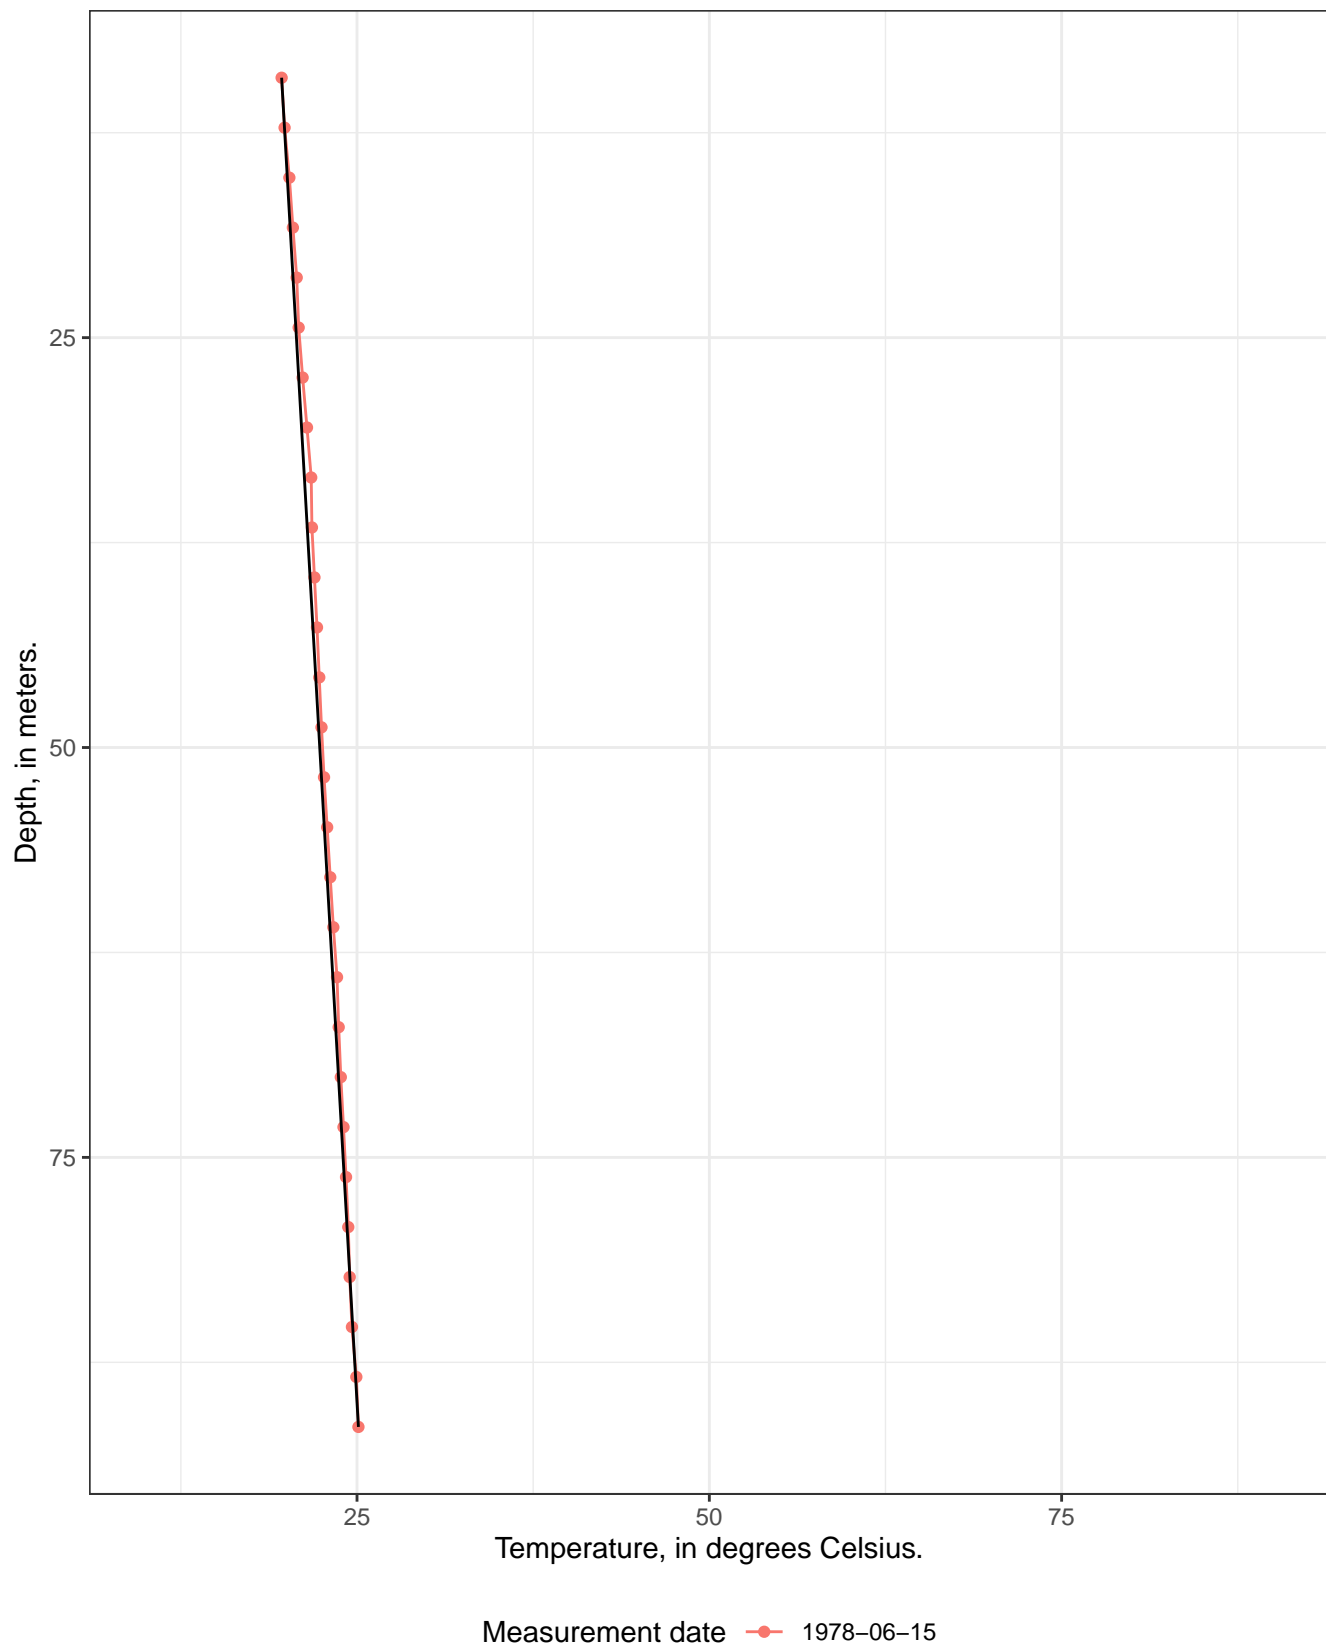



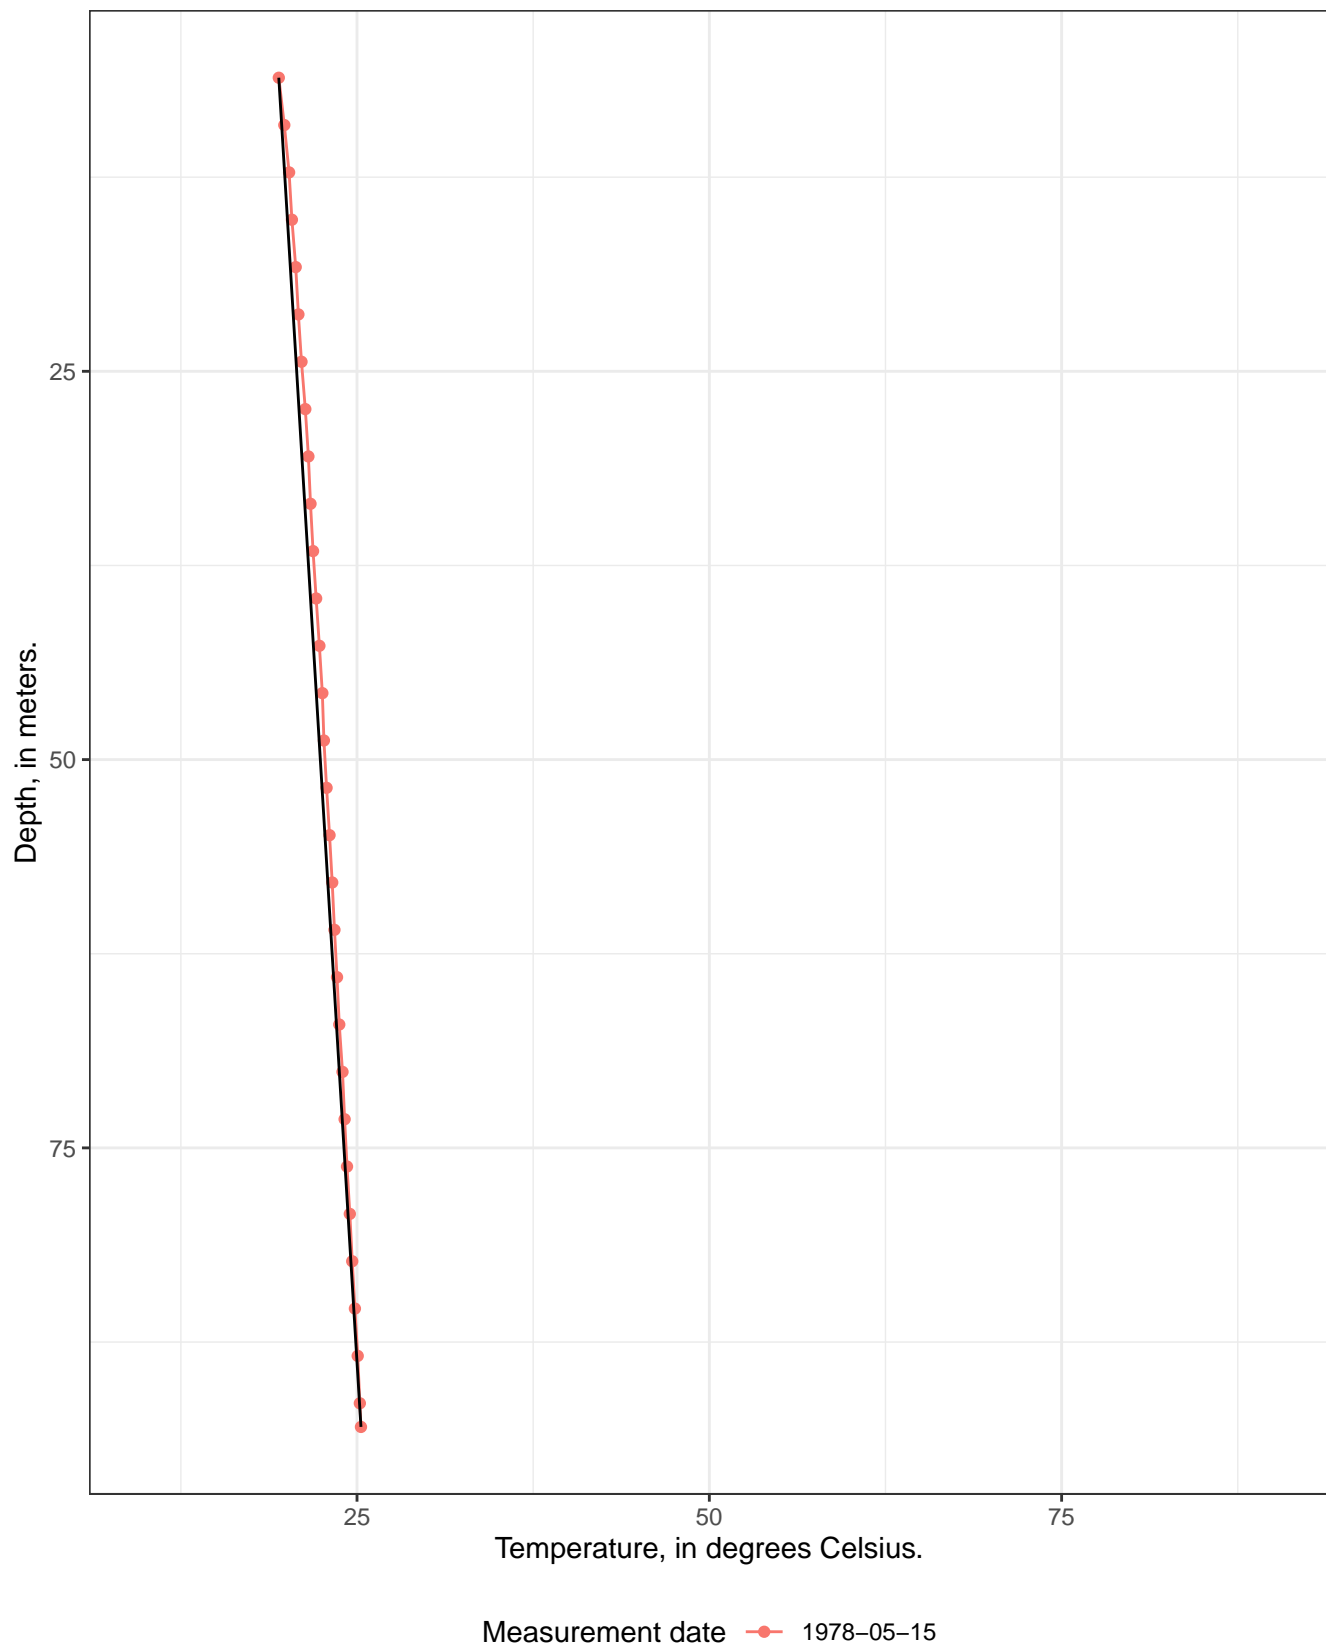

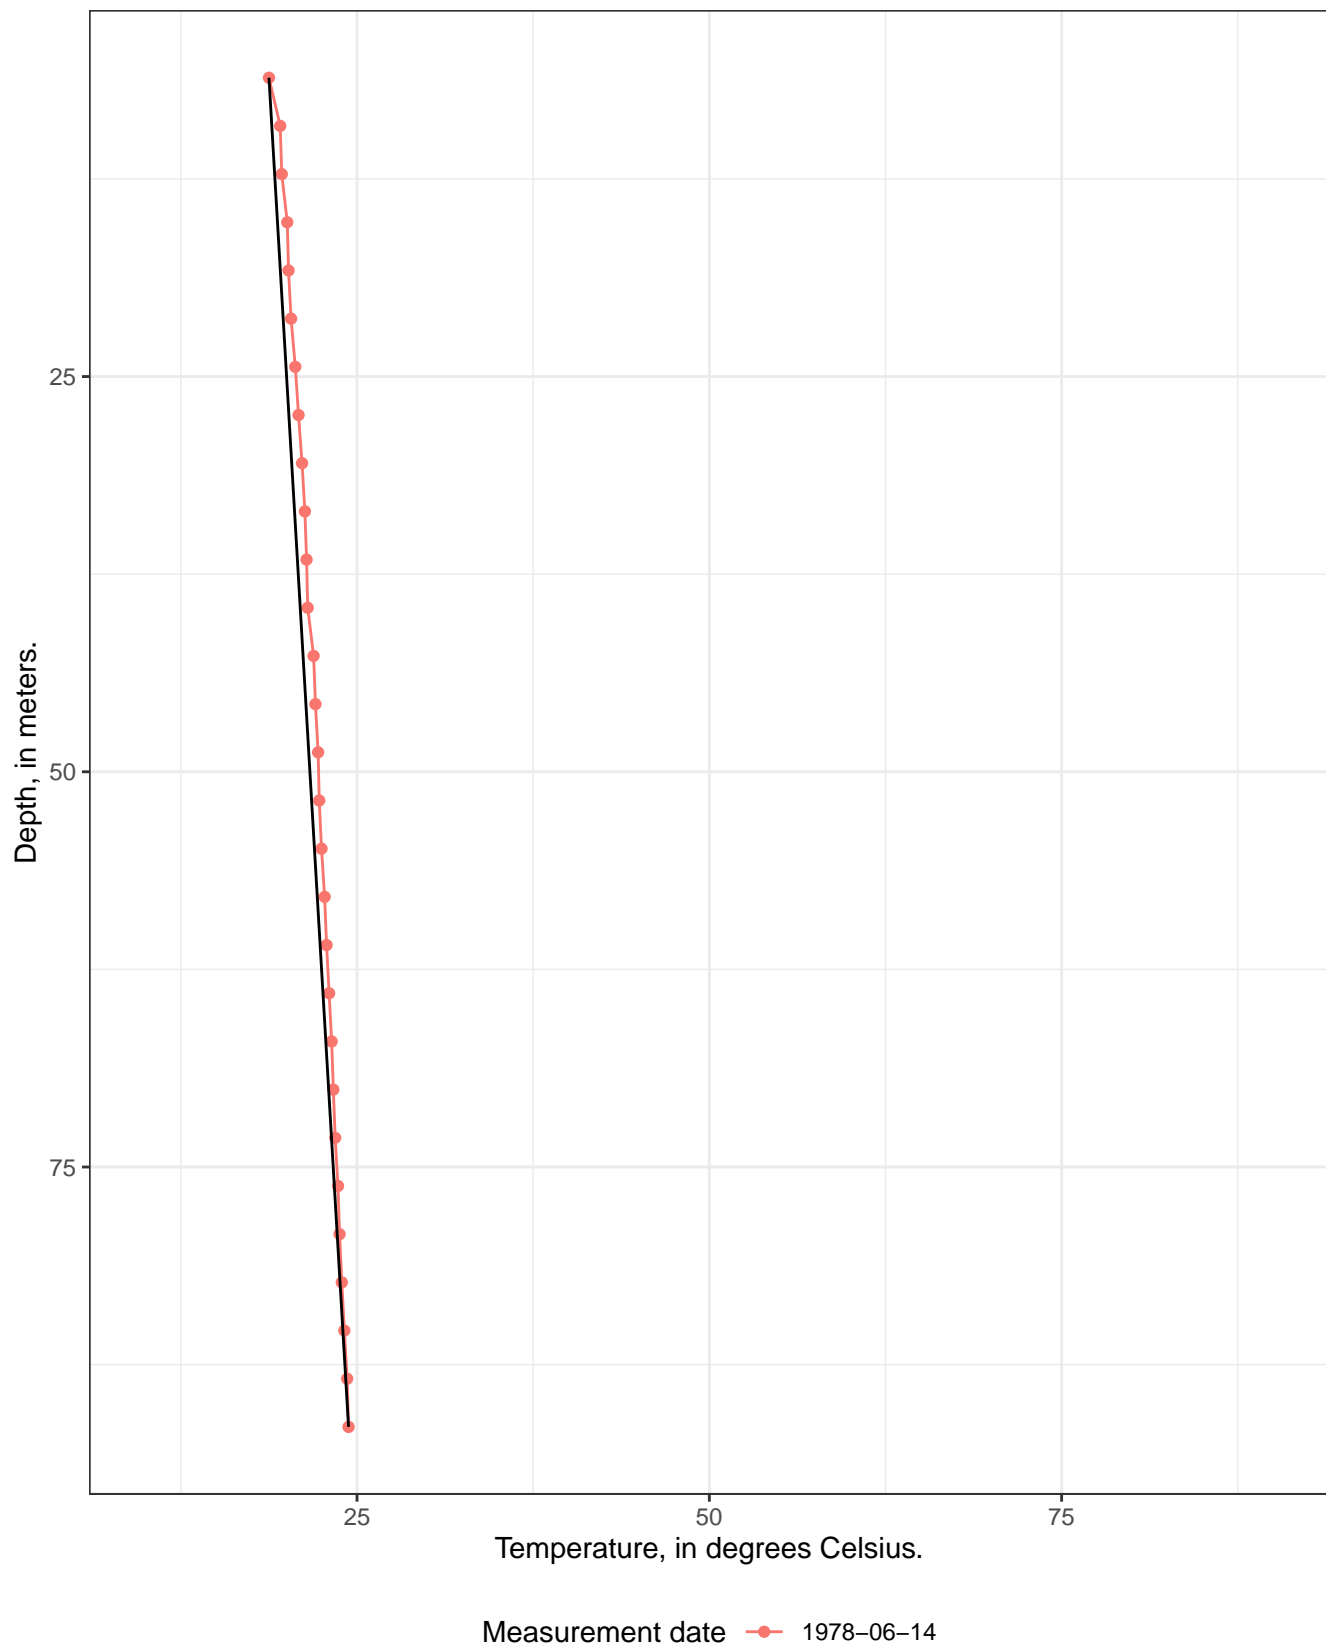

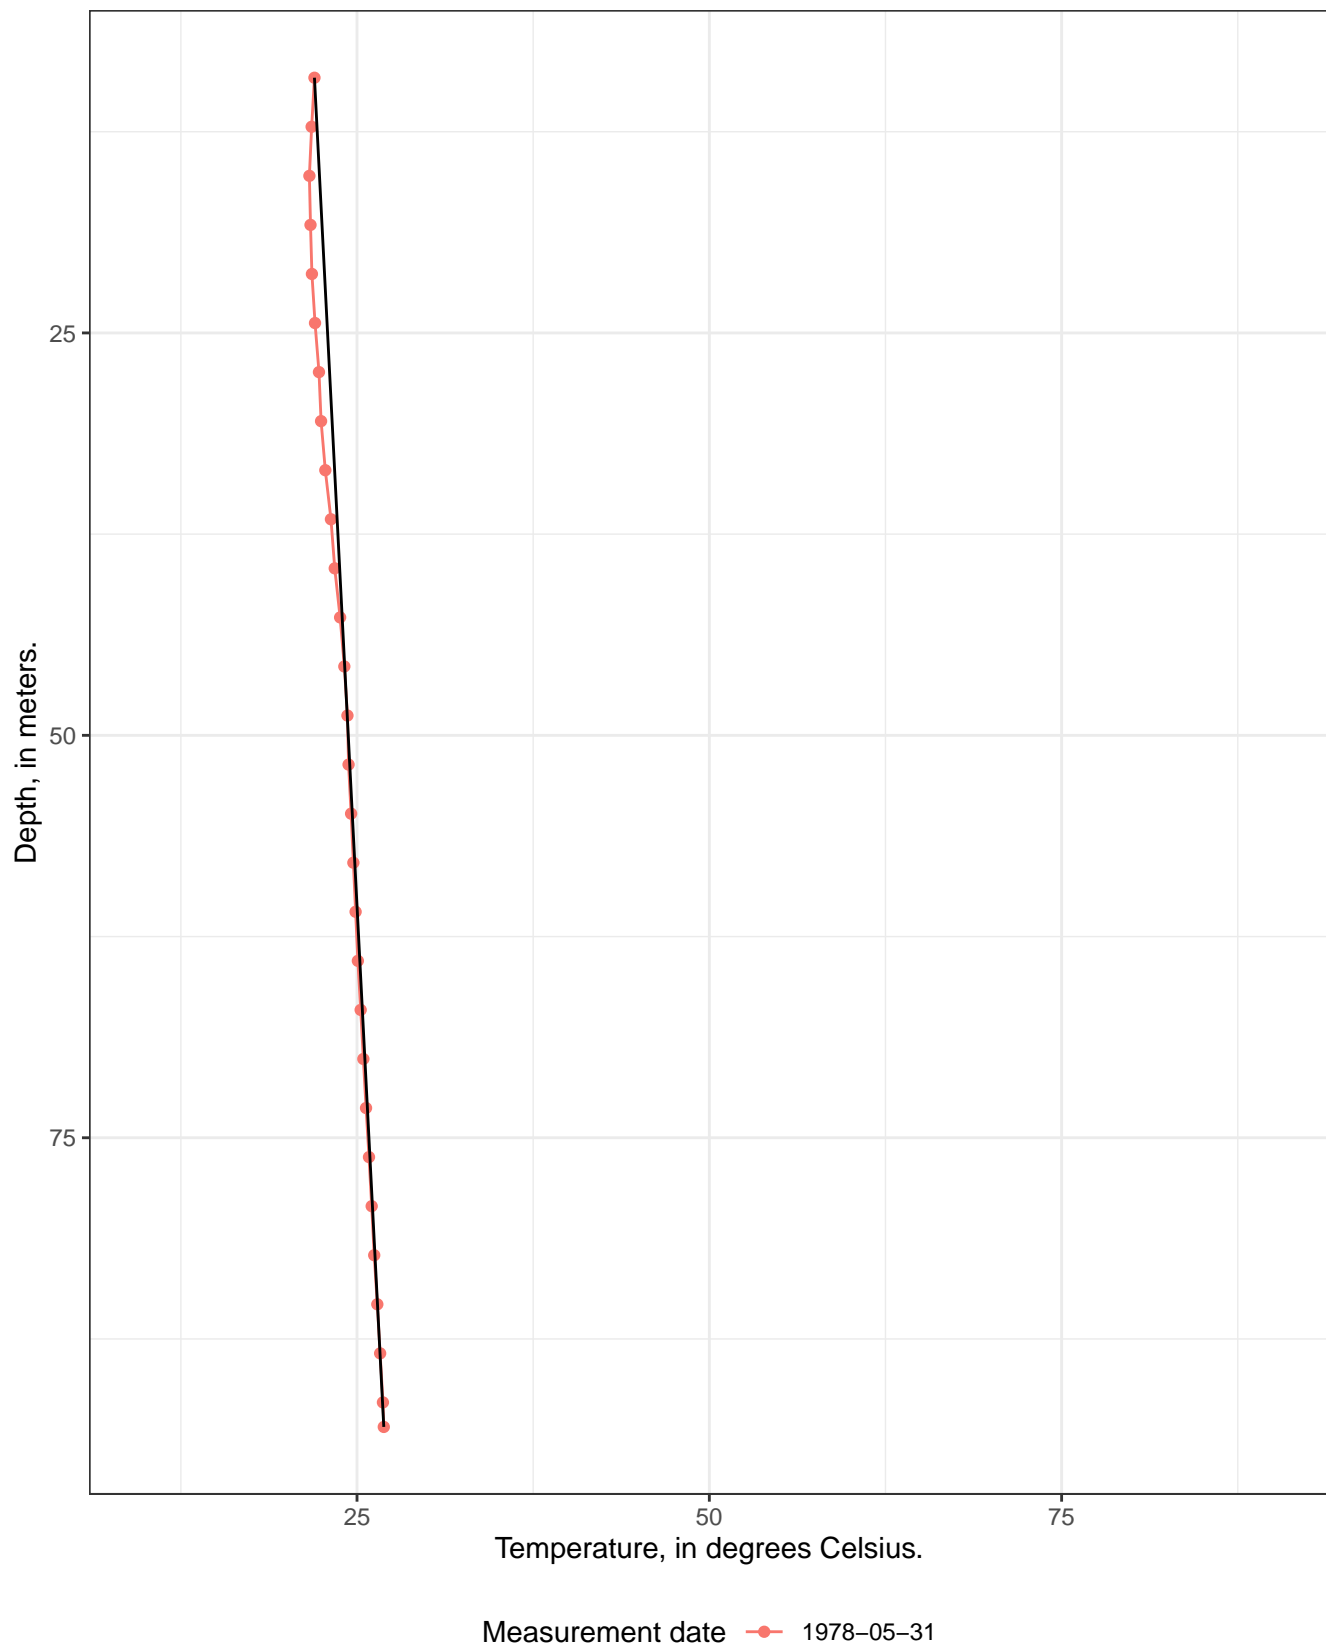

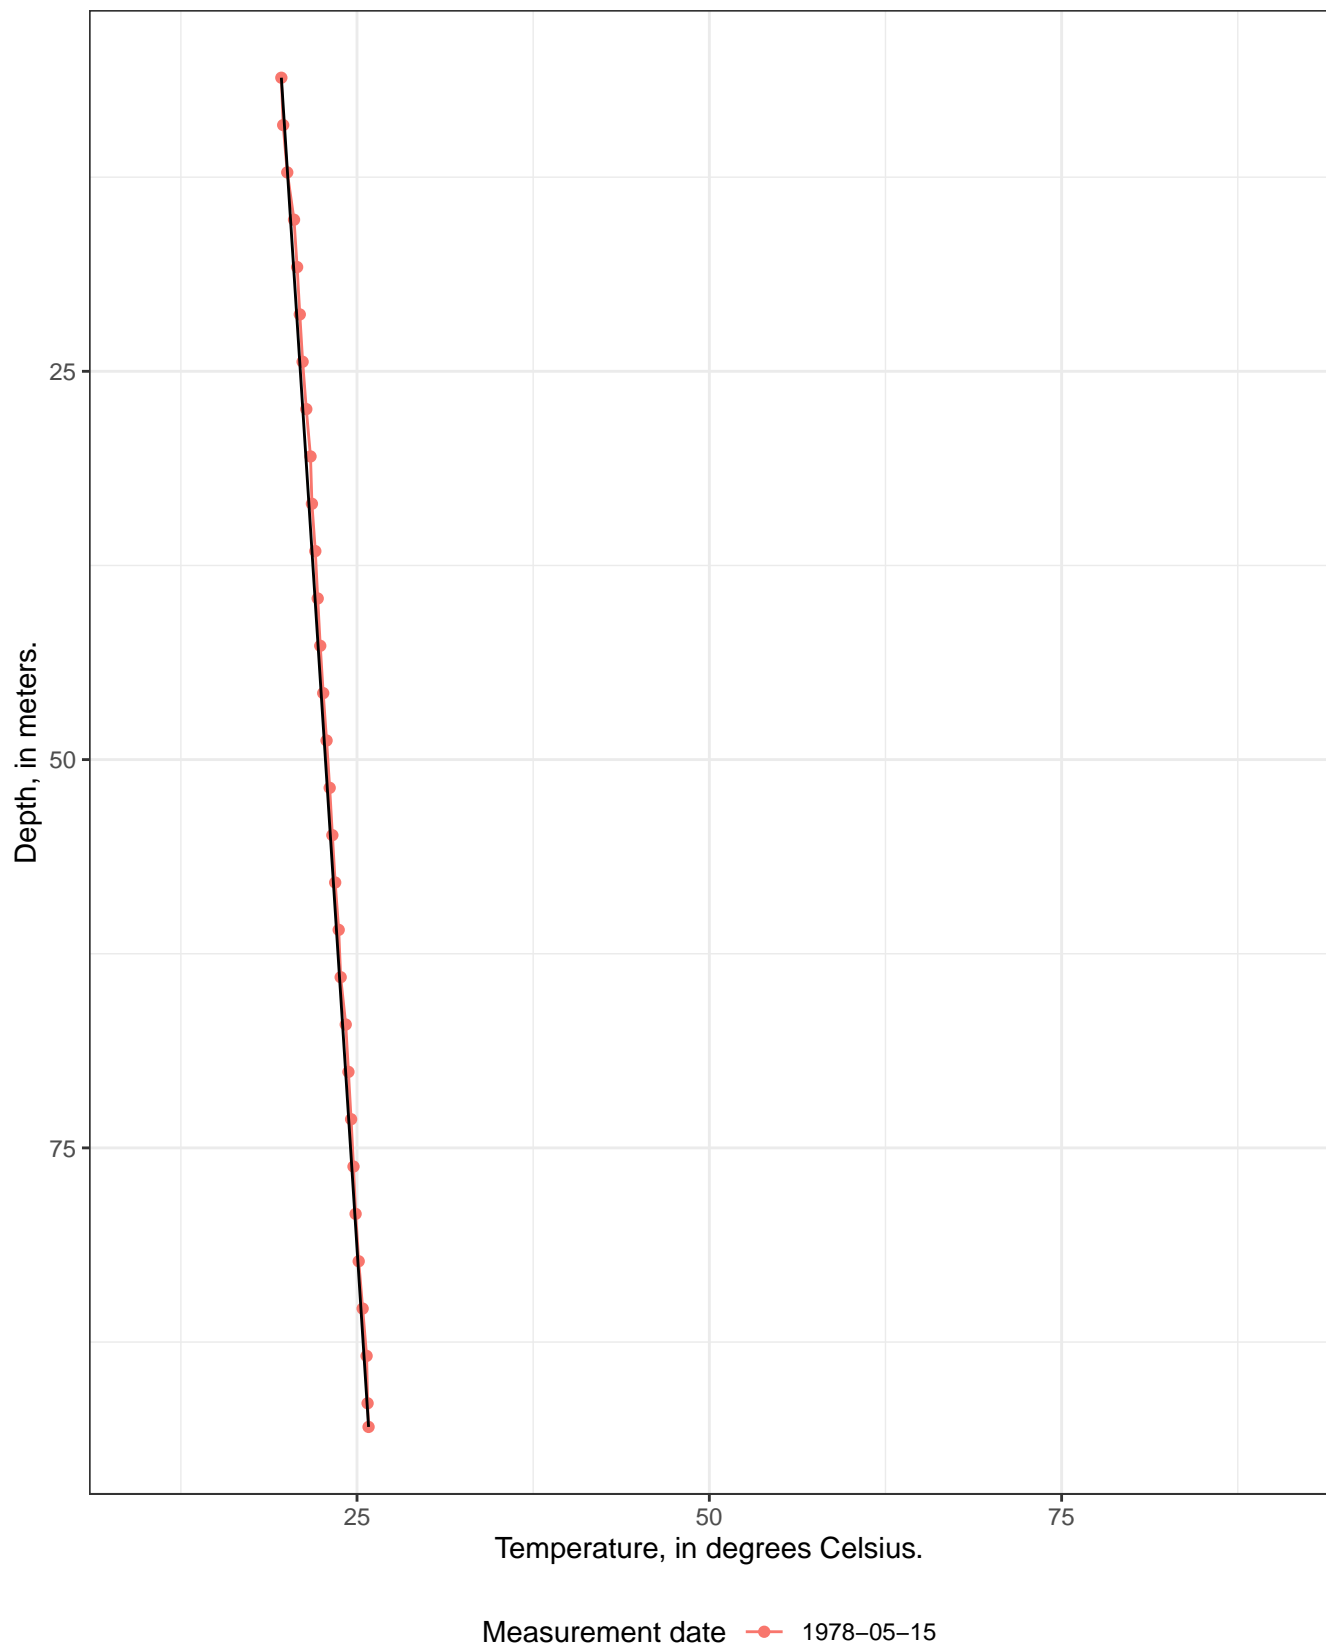

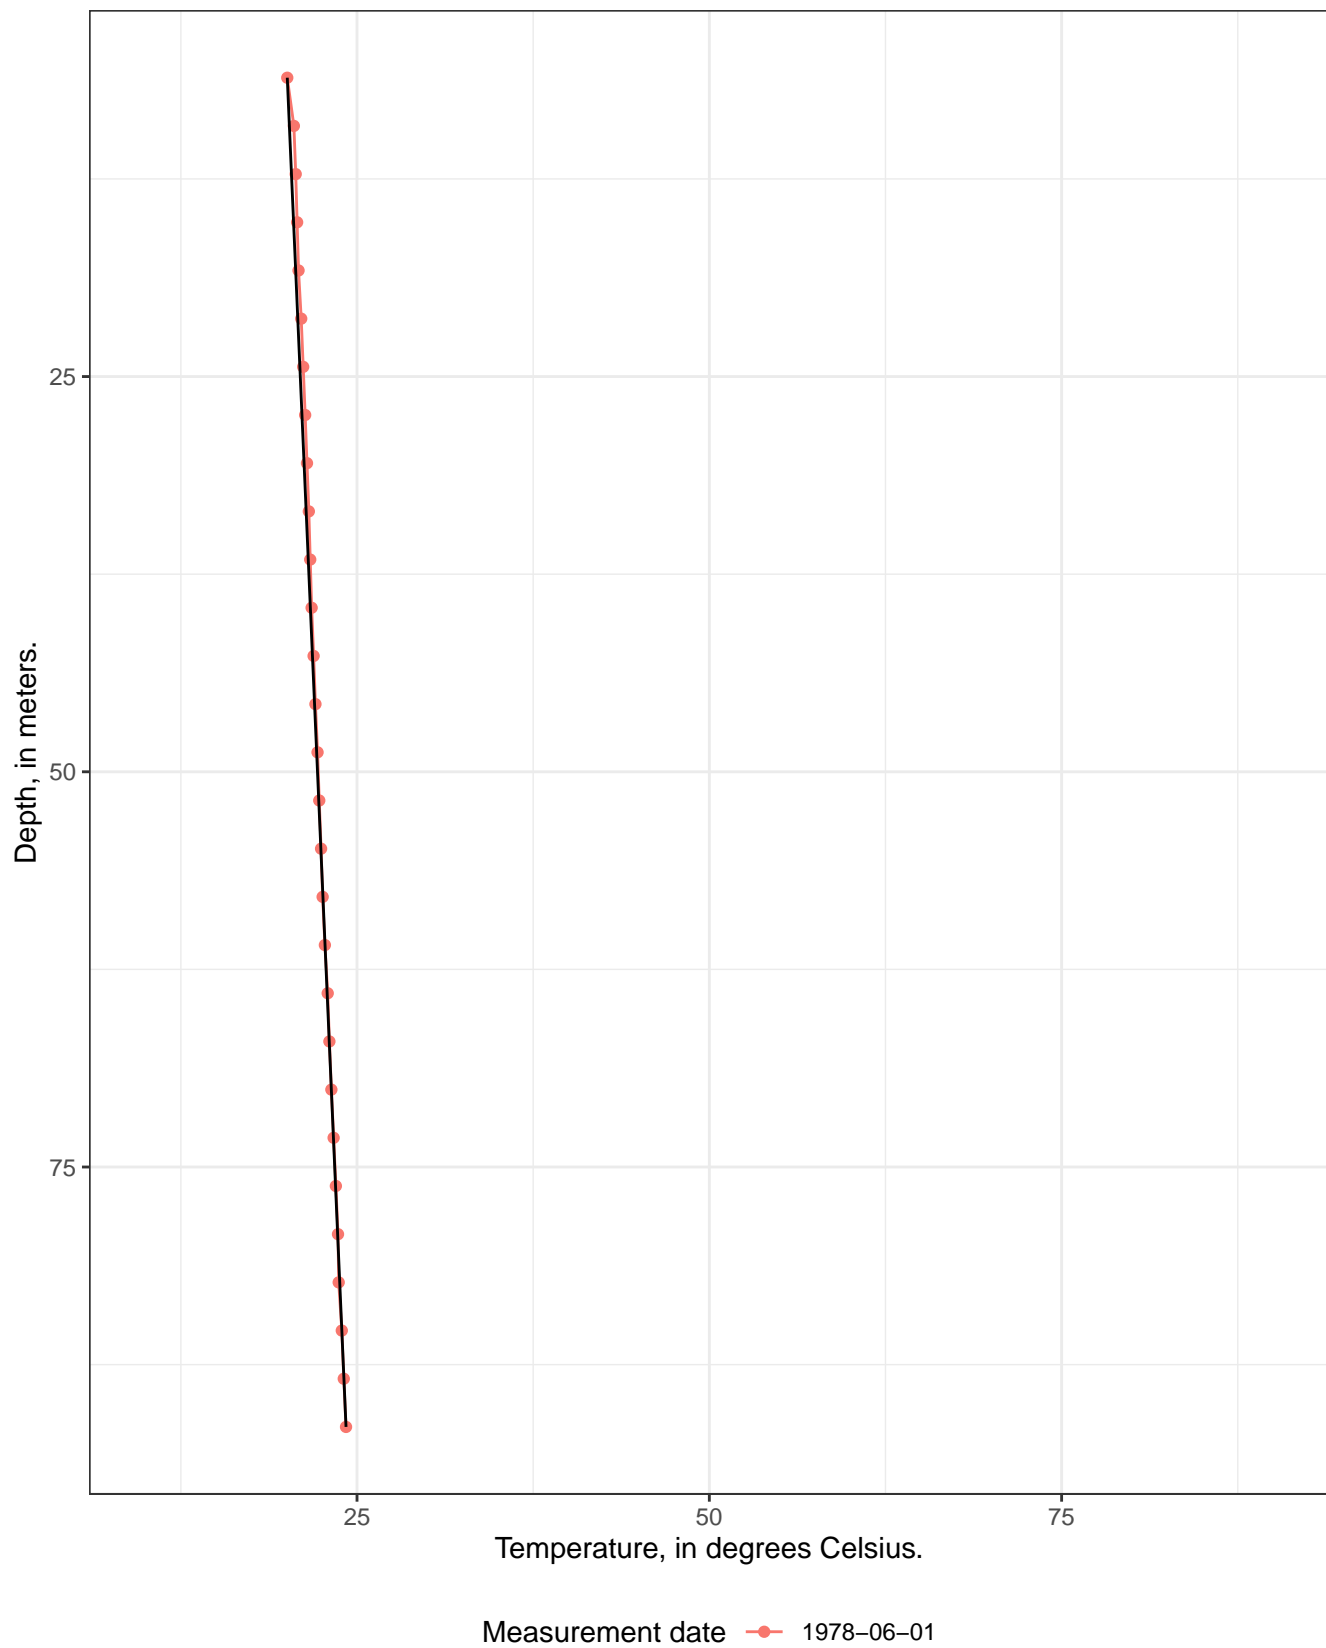

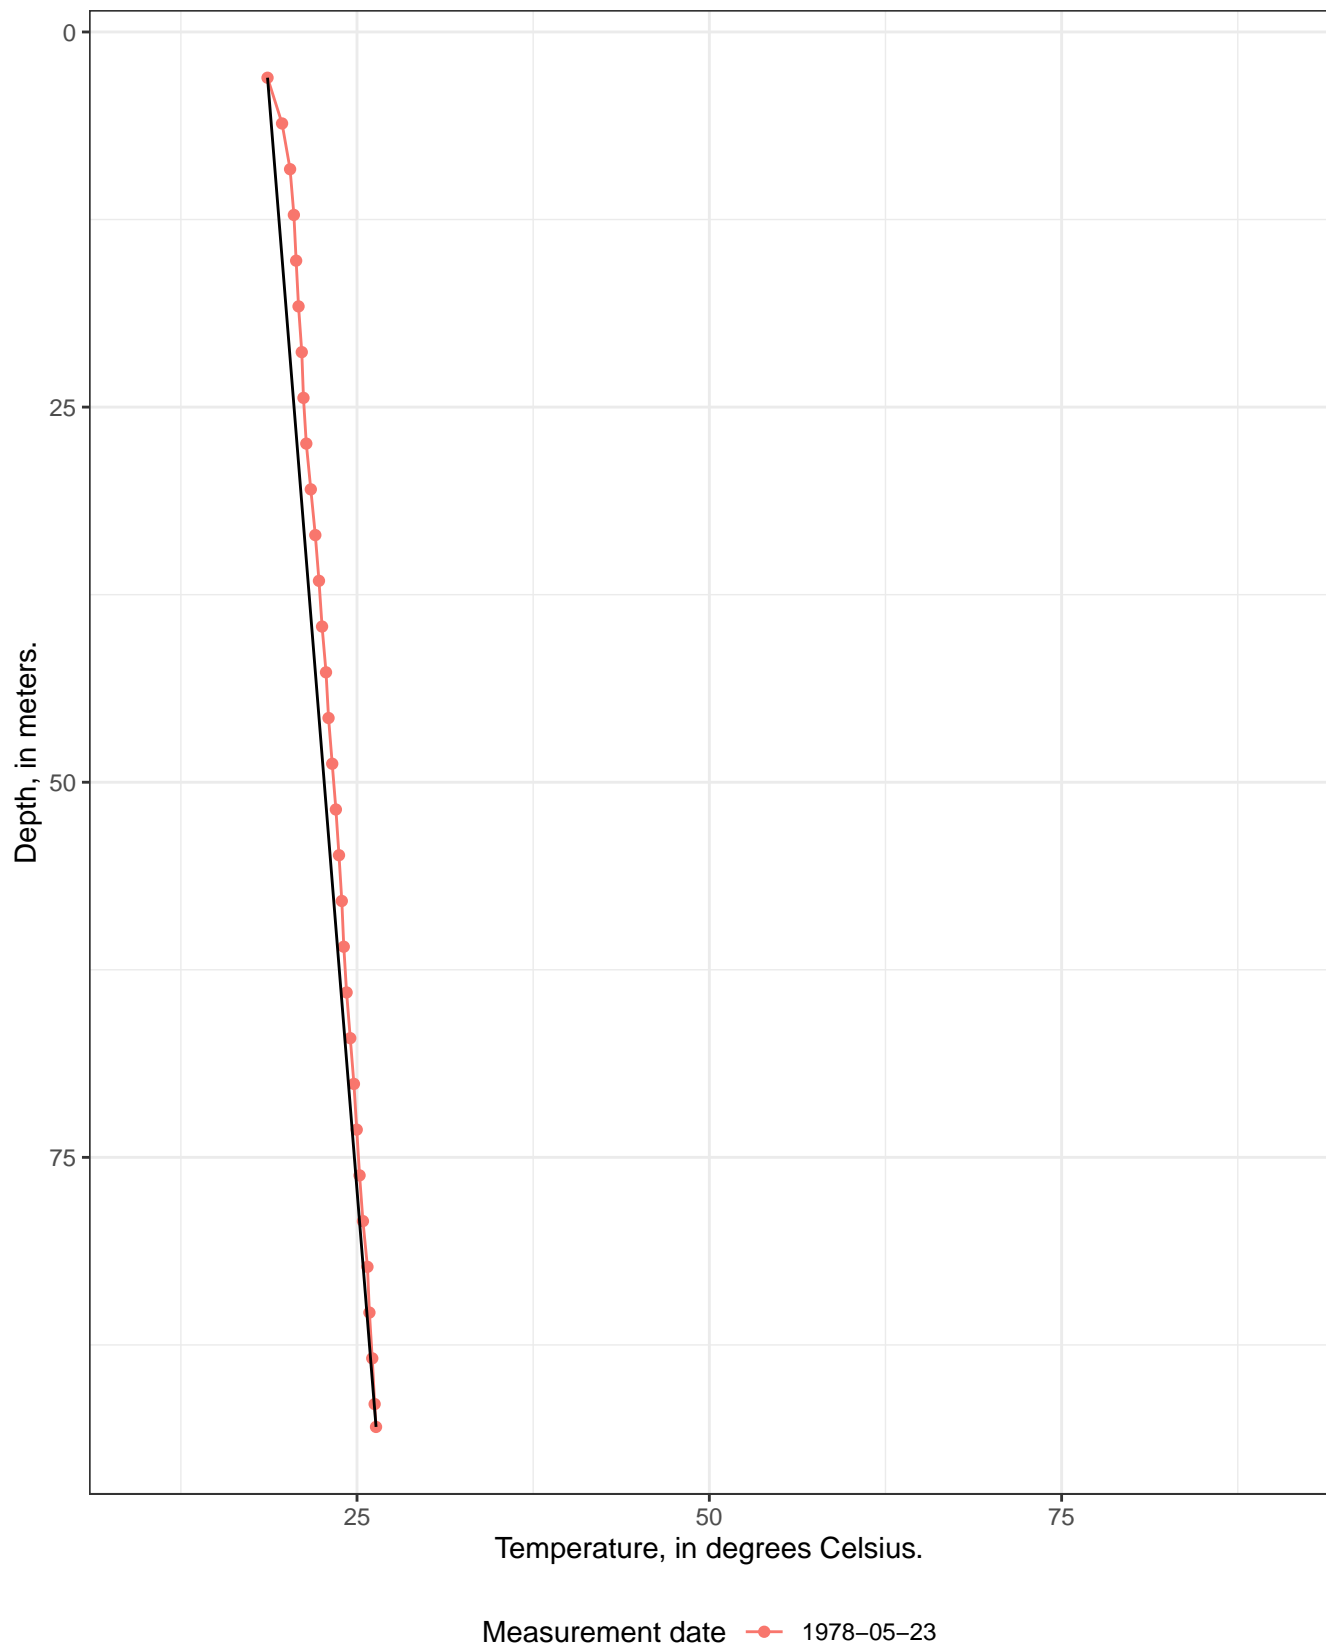

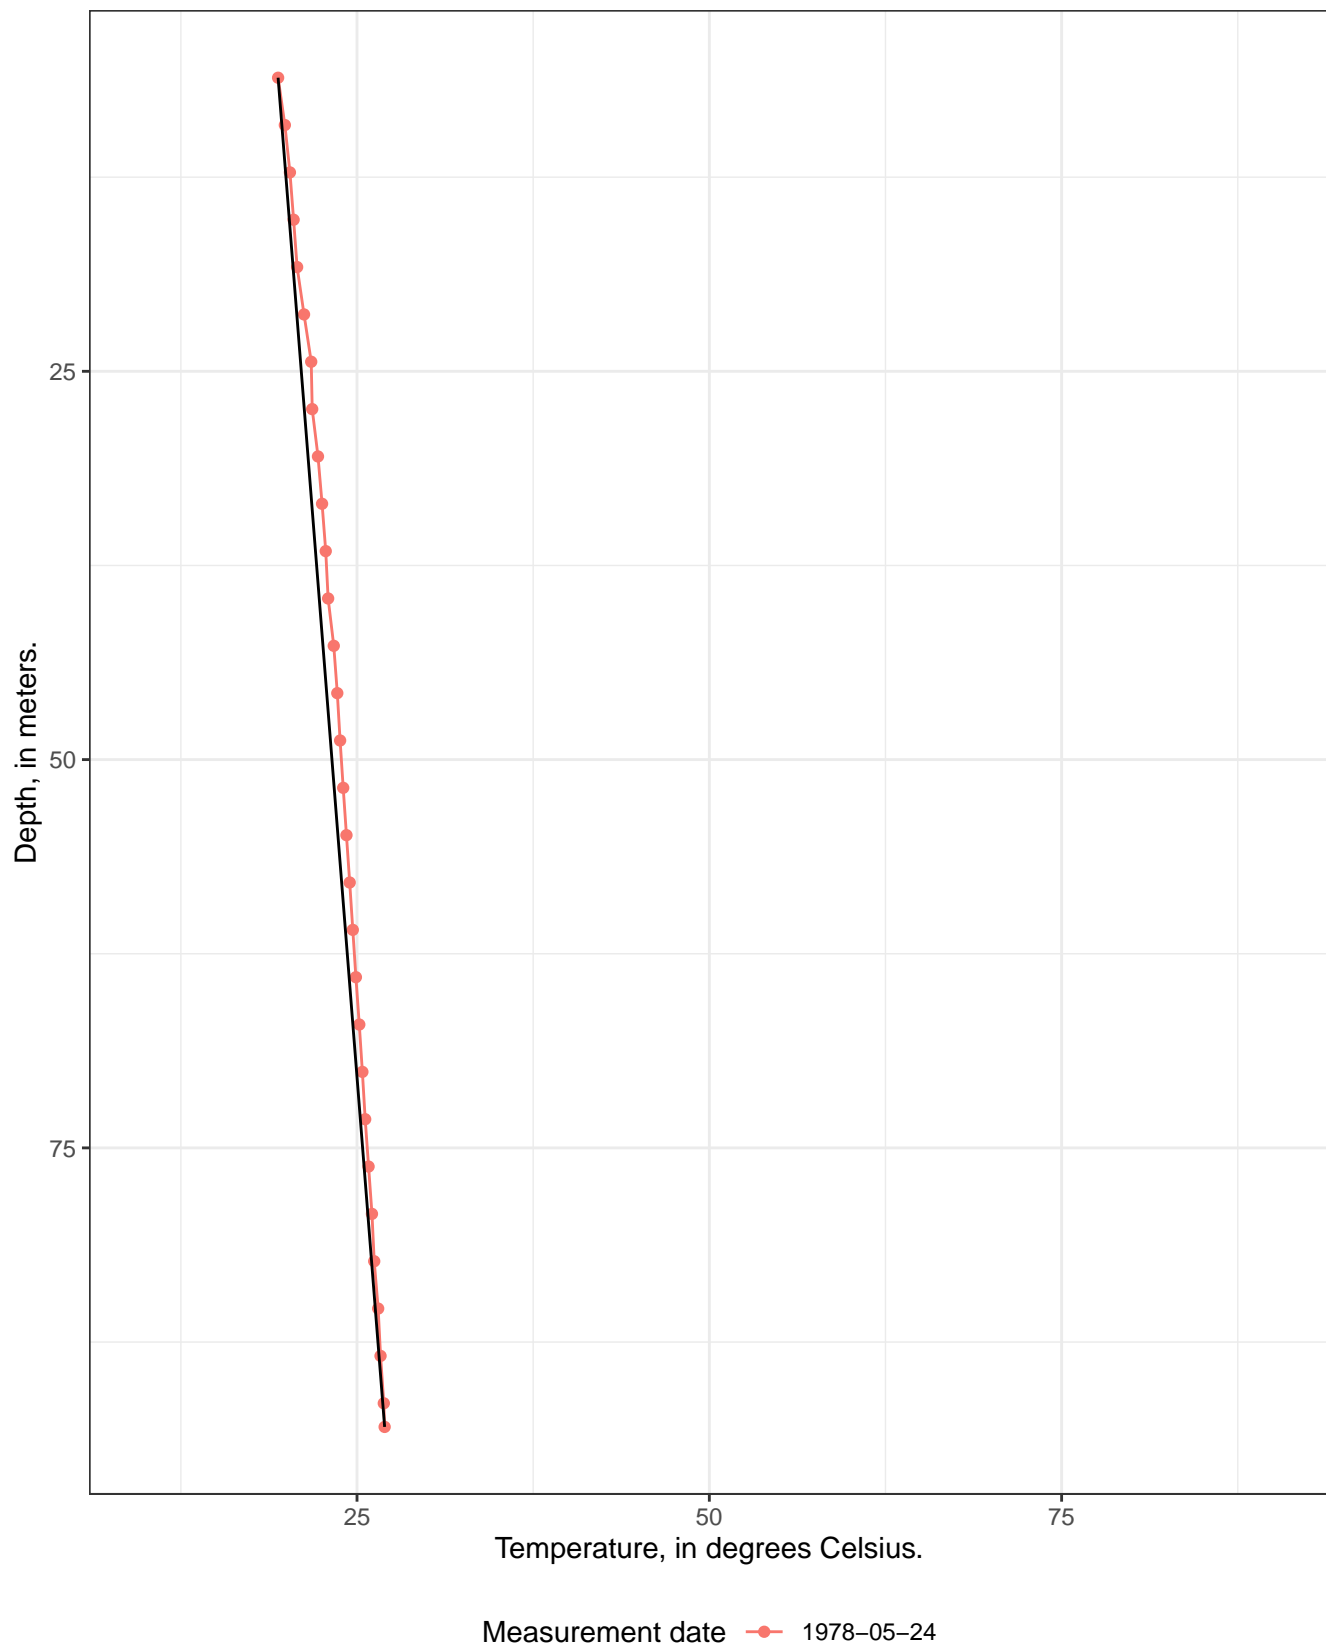

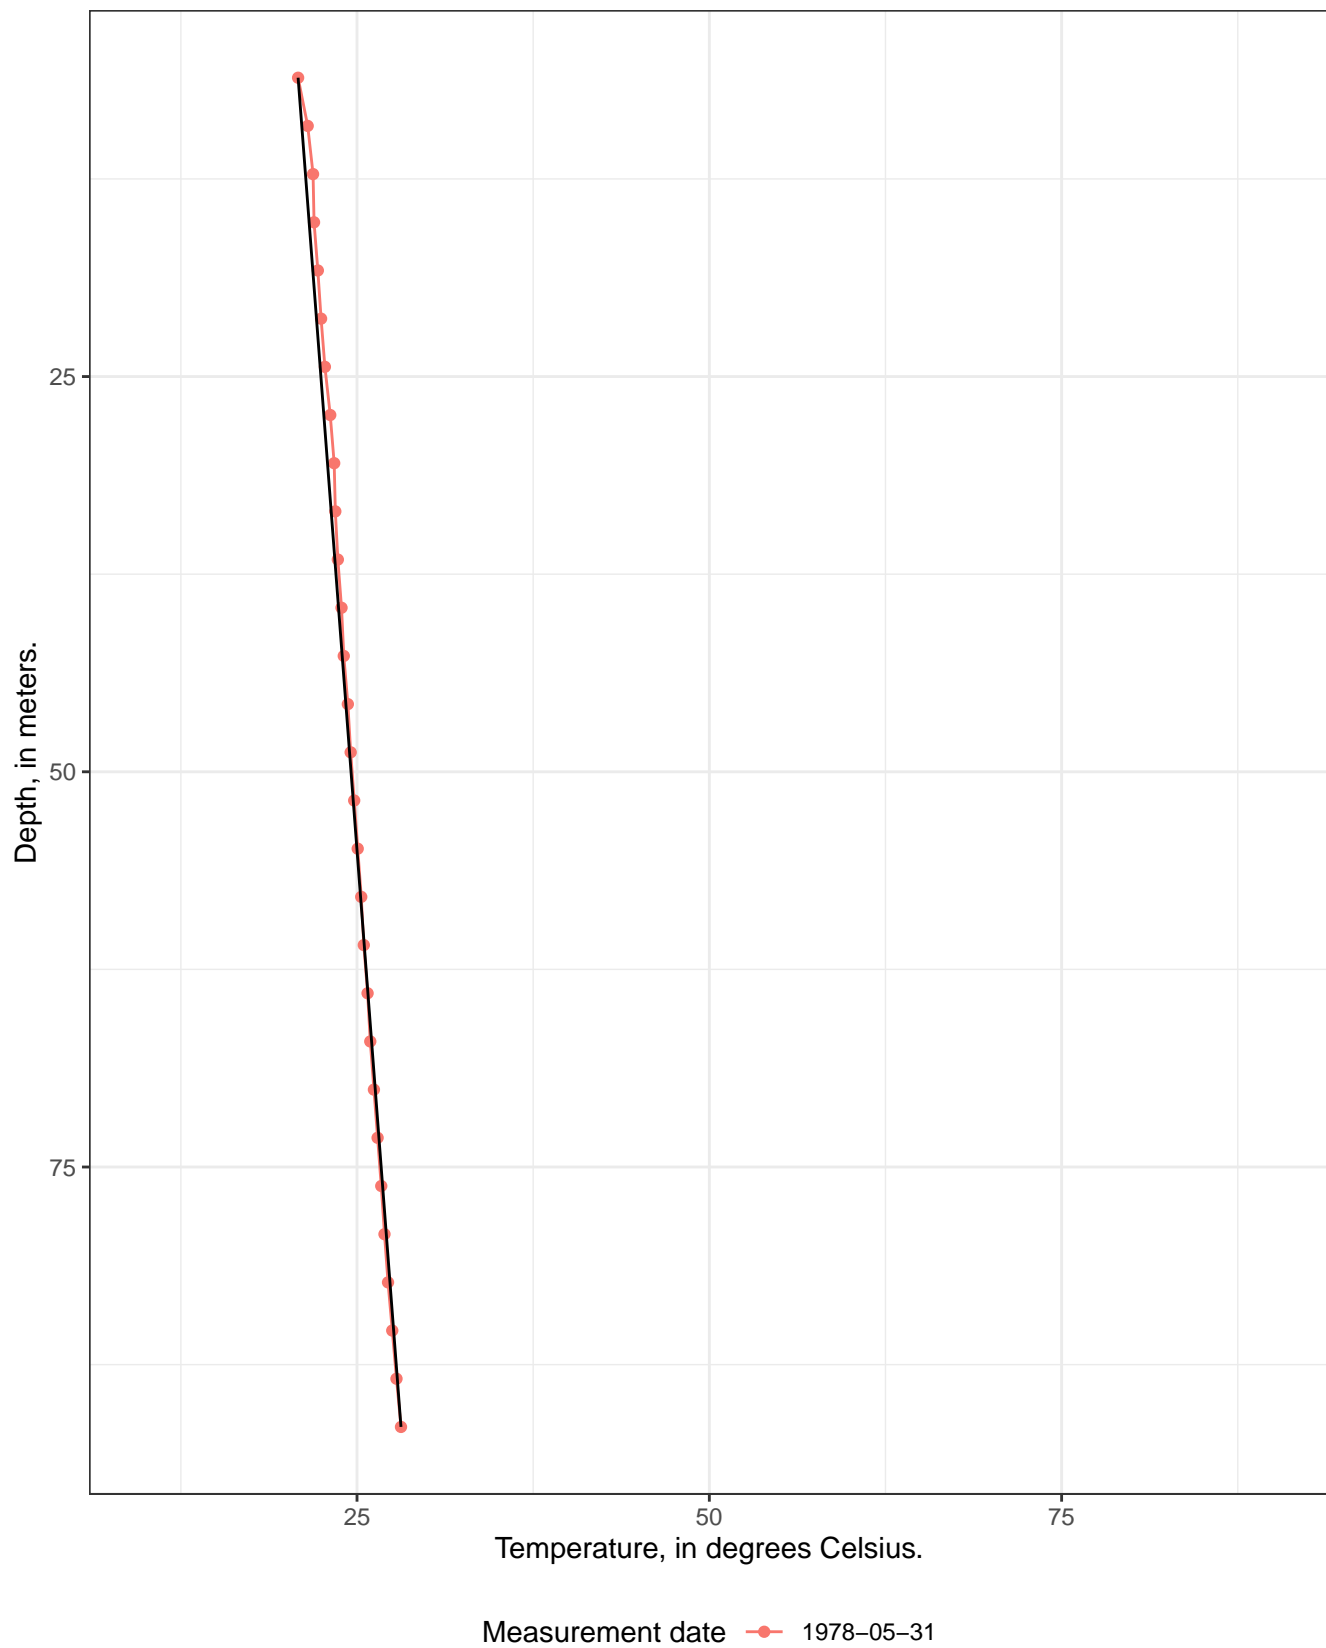



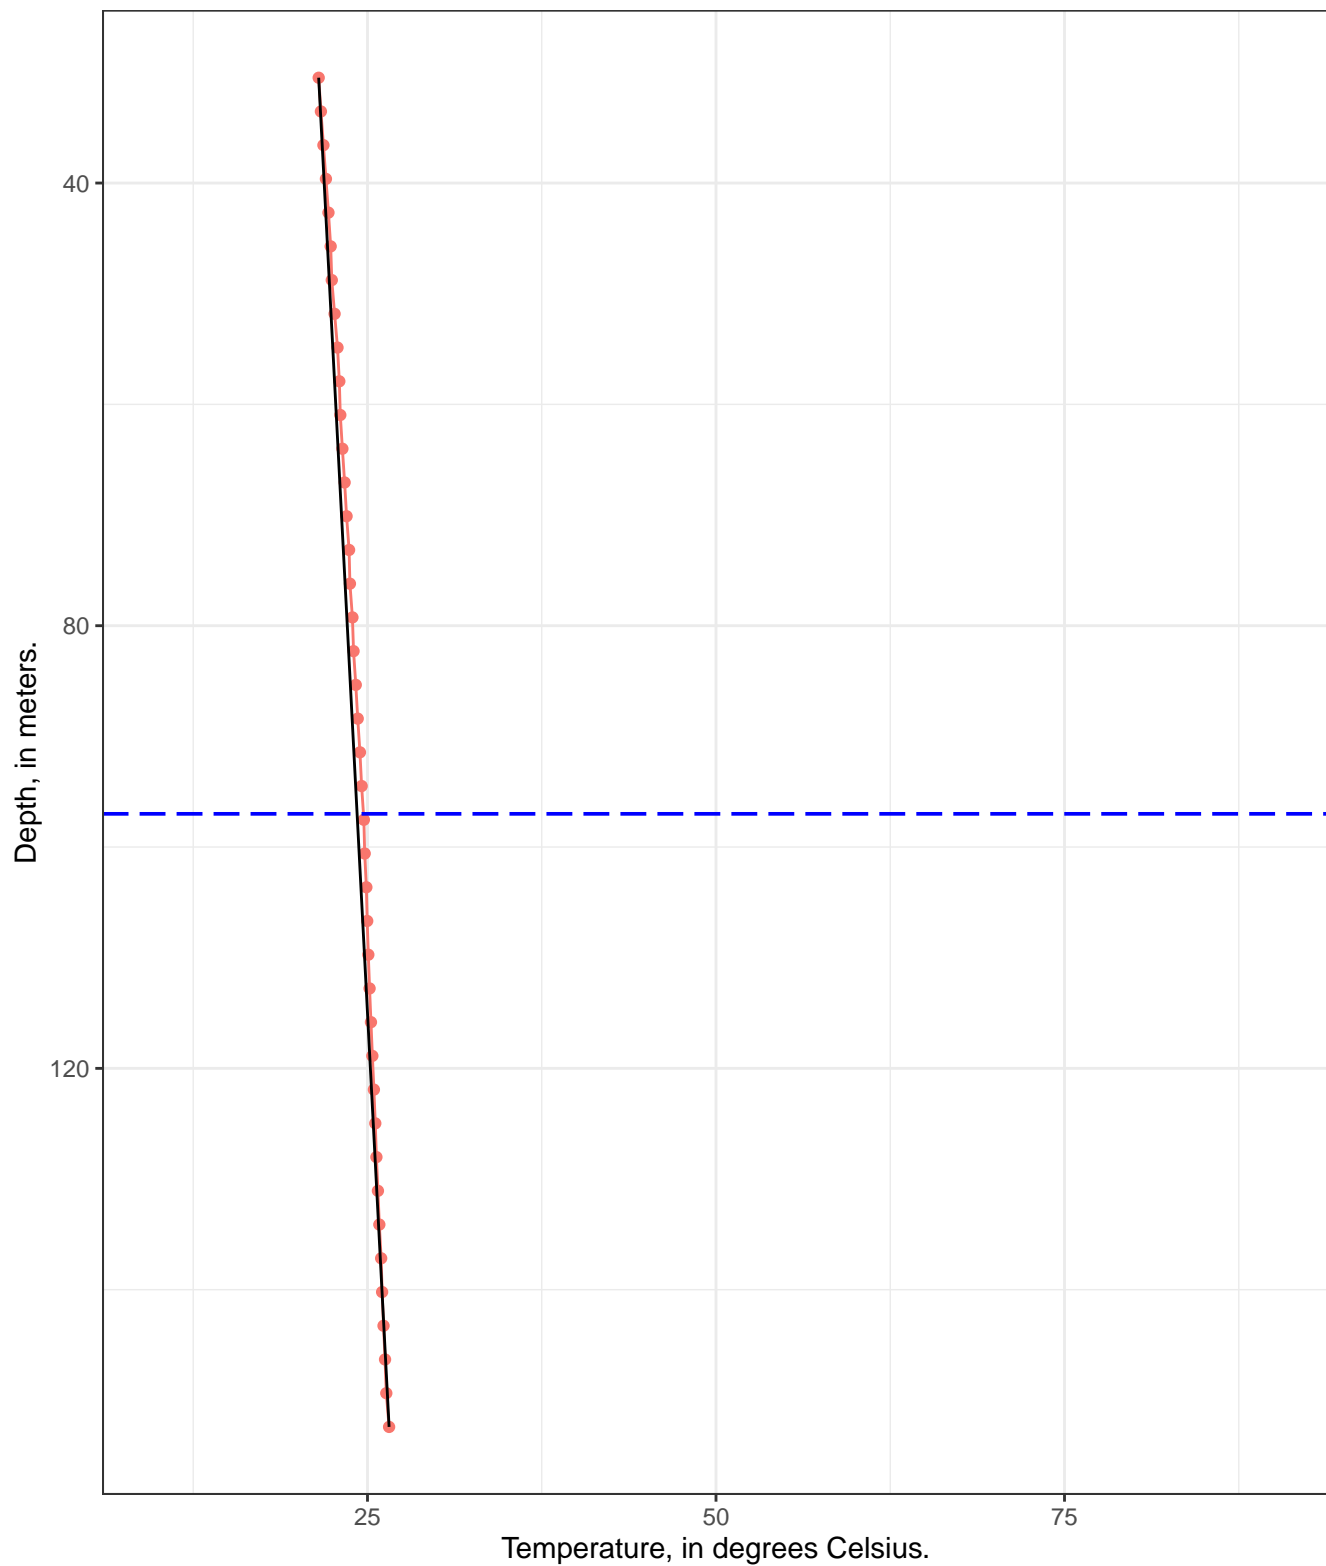

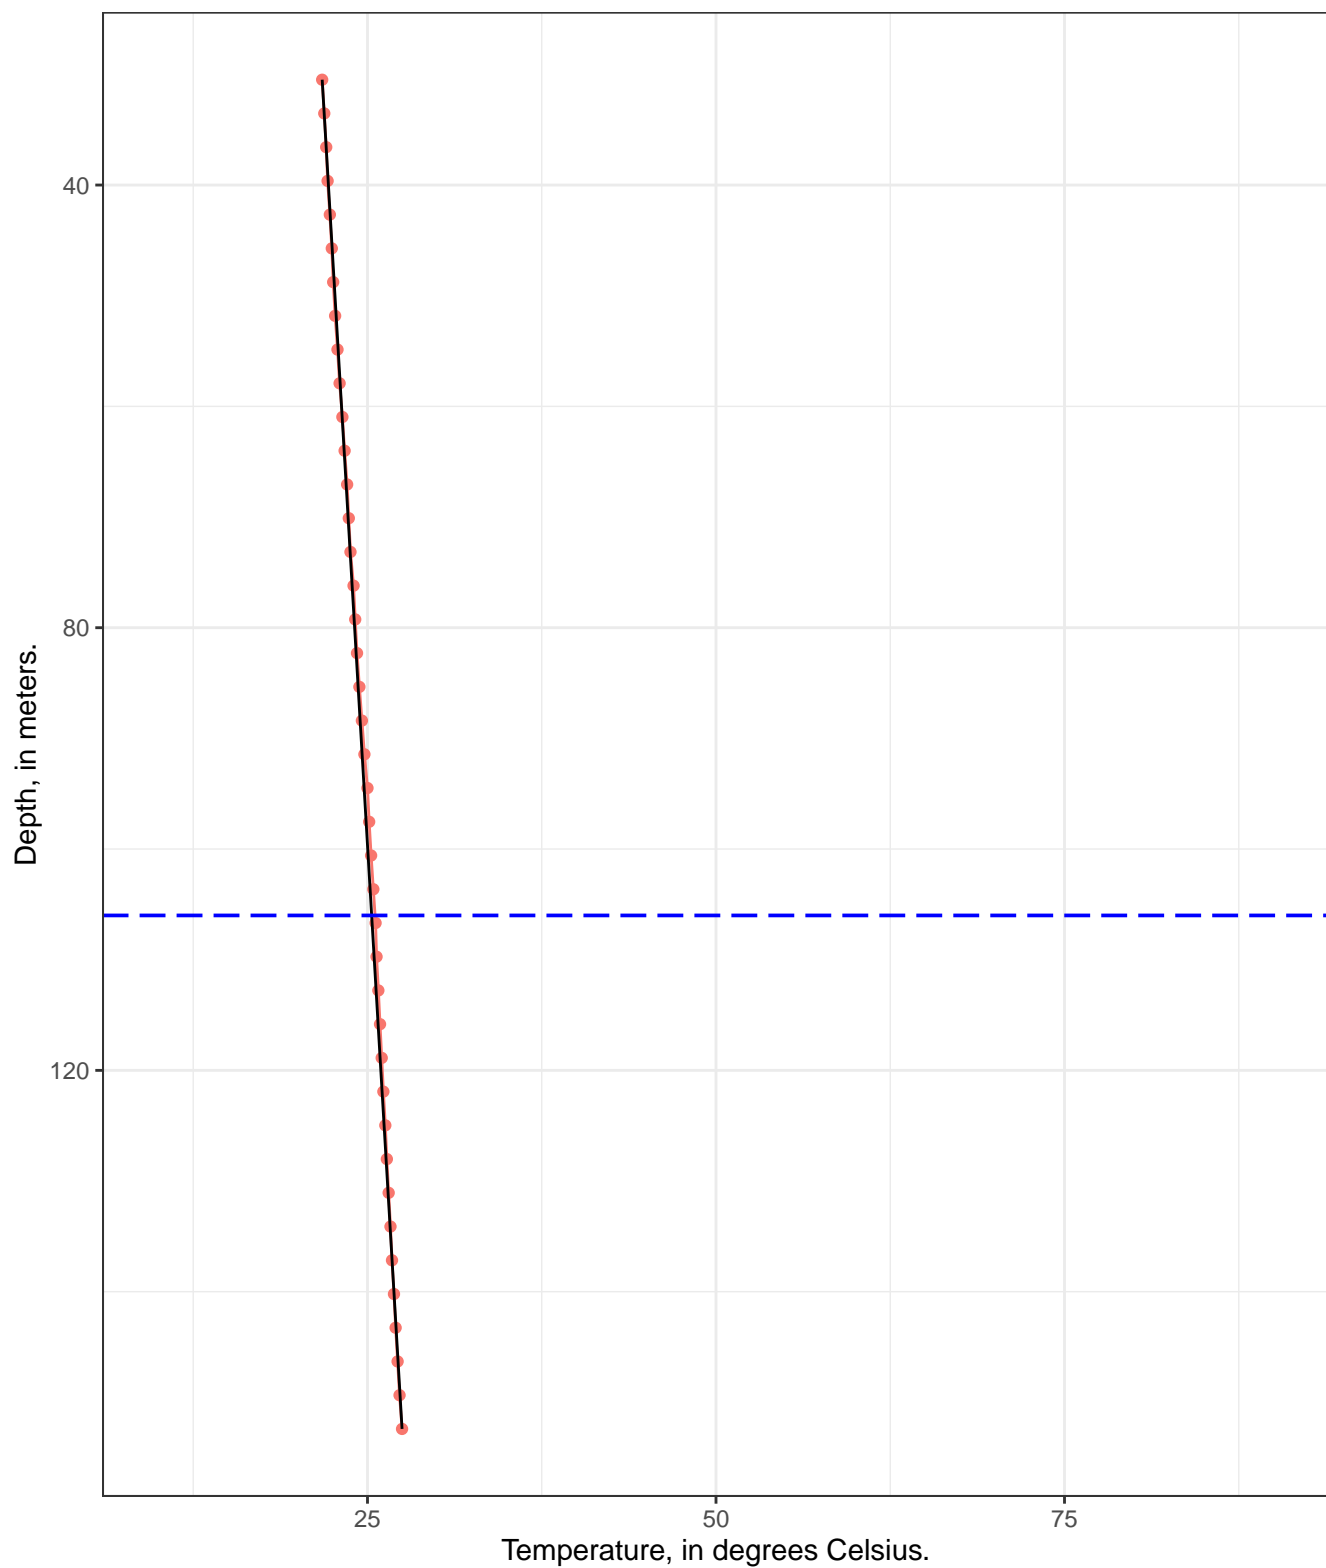

ID: 50 [ANKB-36\_KILBOURNE\_HOLE]

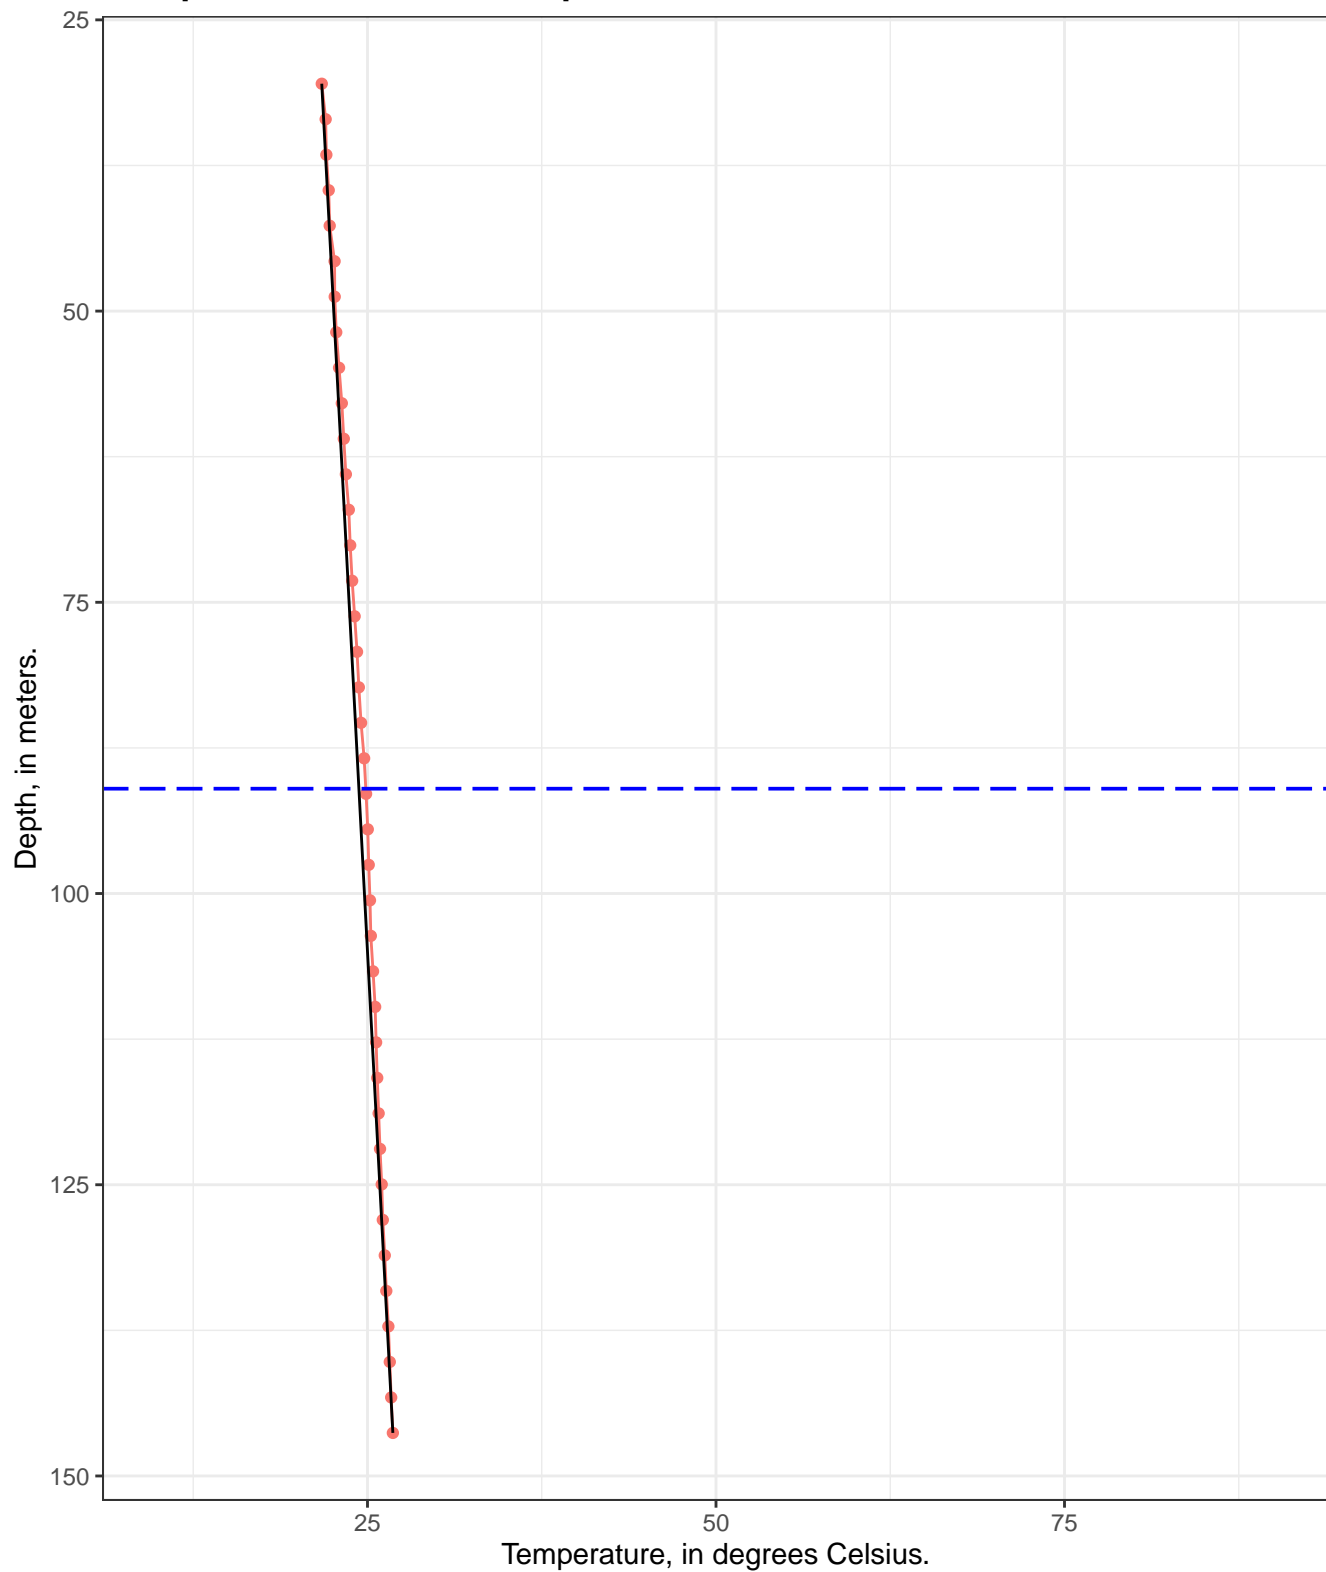

Measurement date 1978-06-26

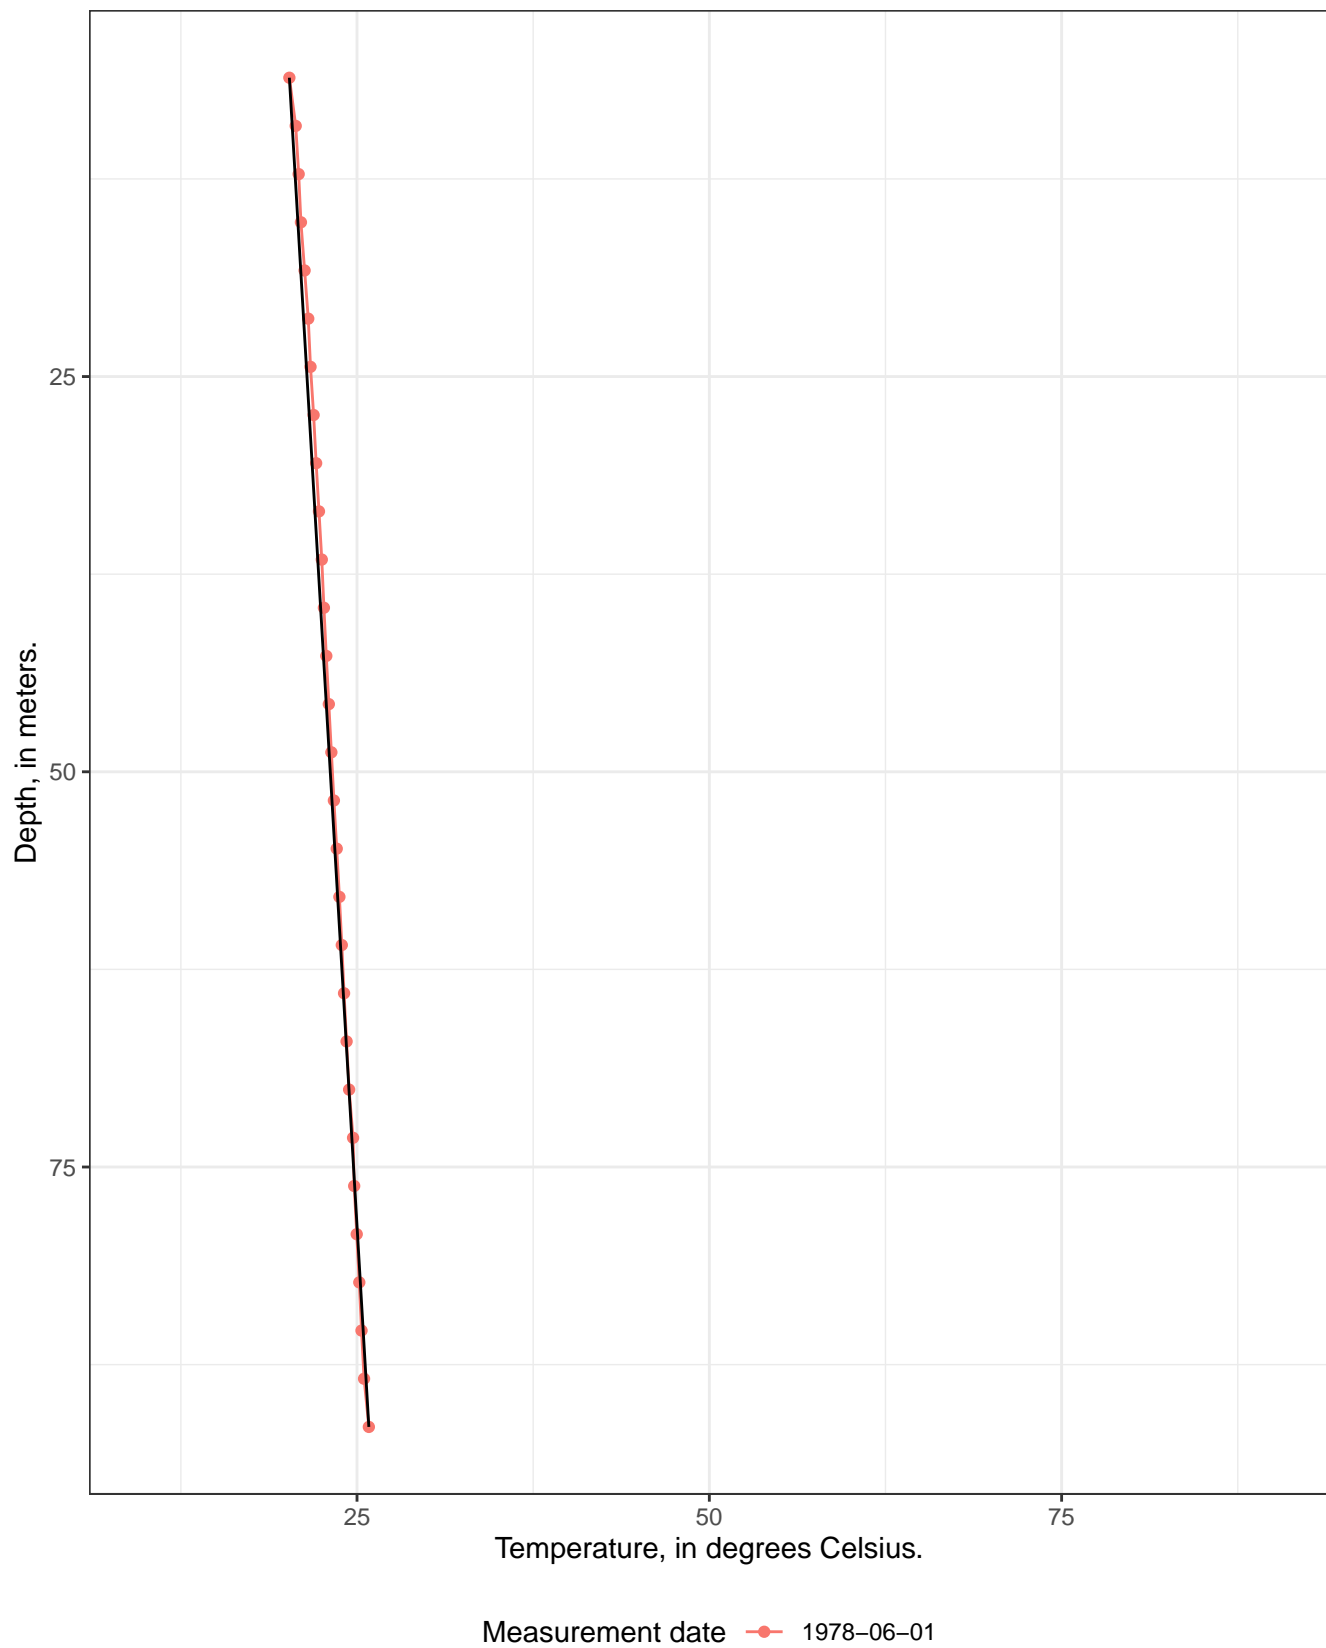

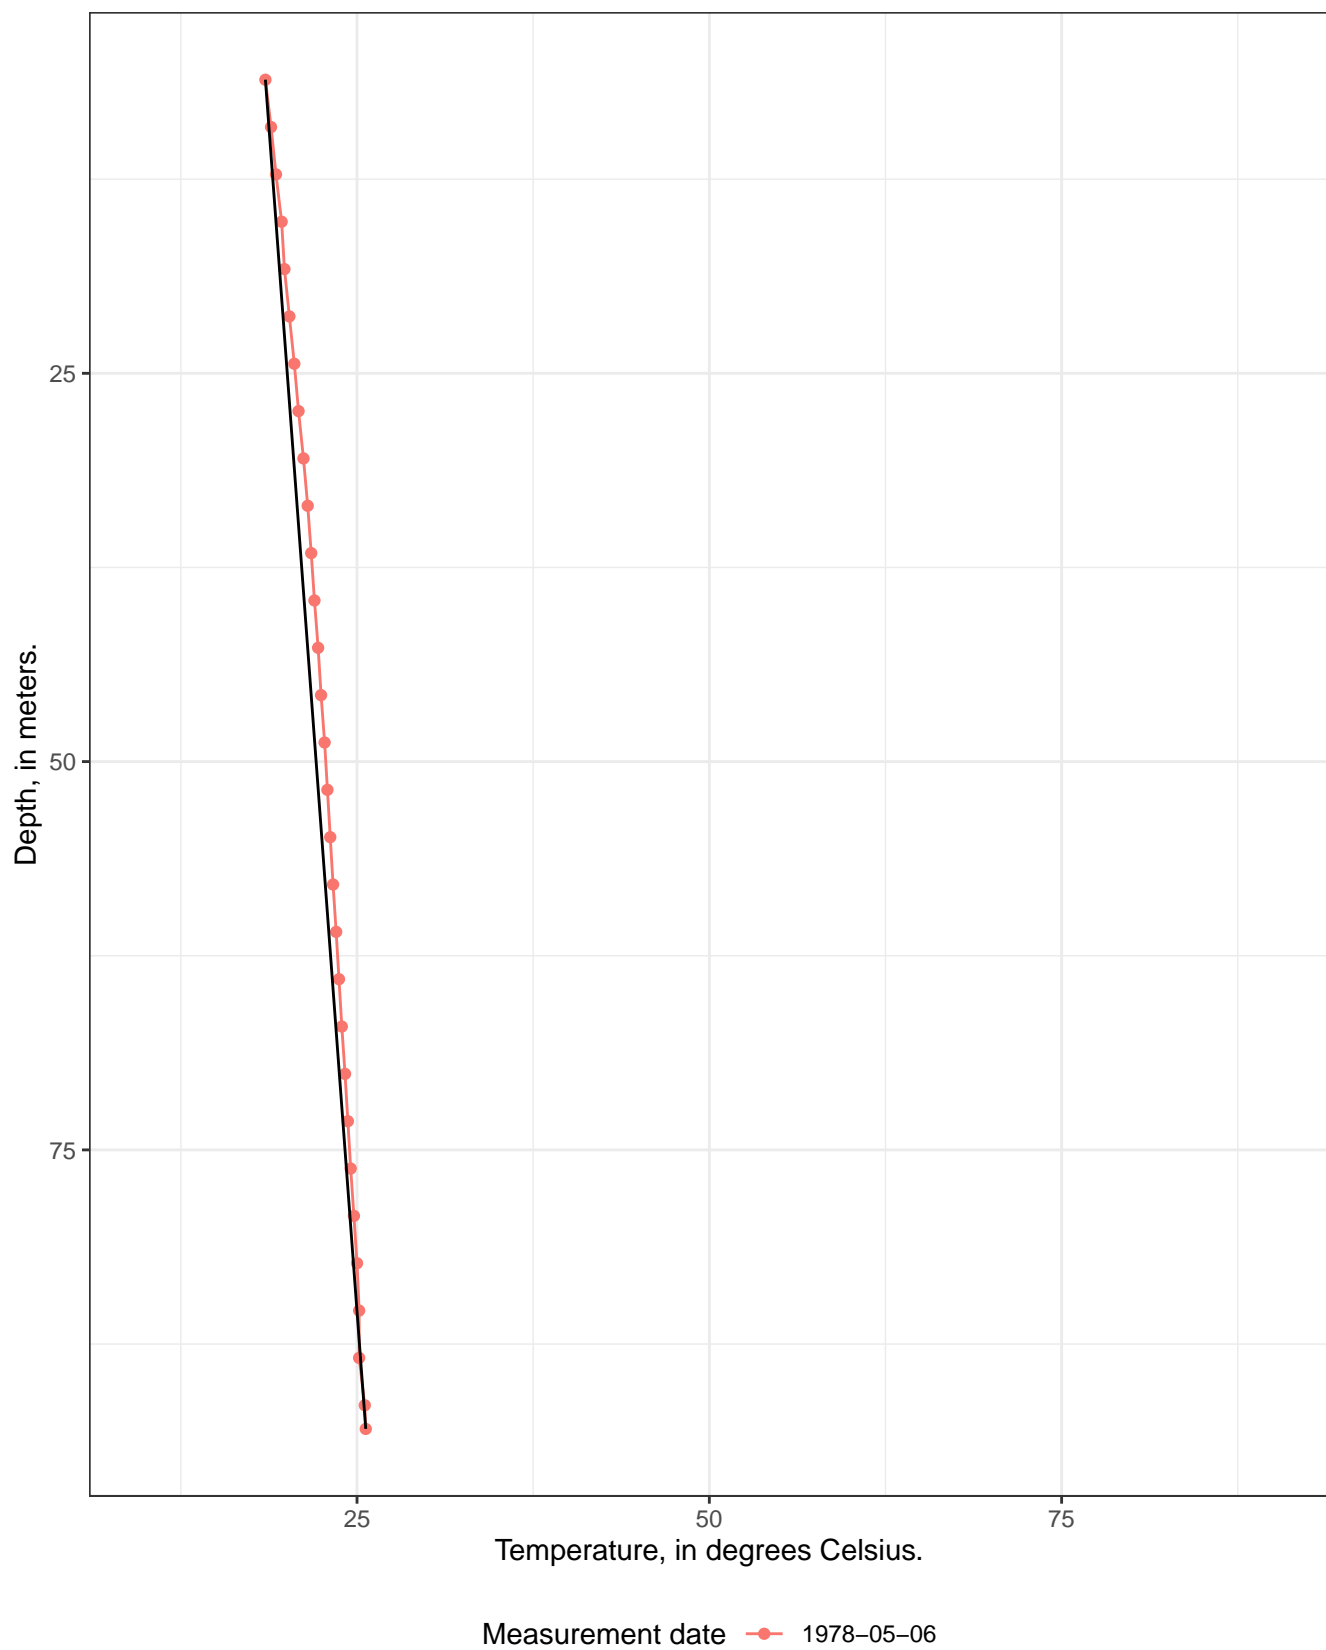

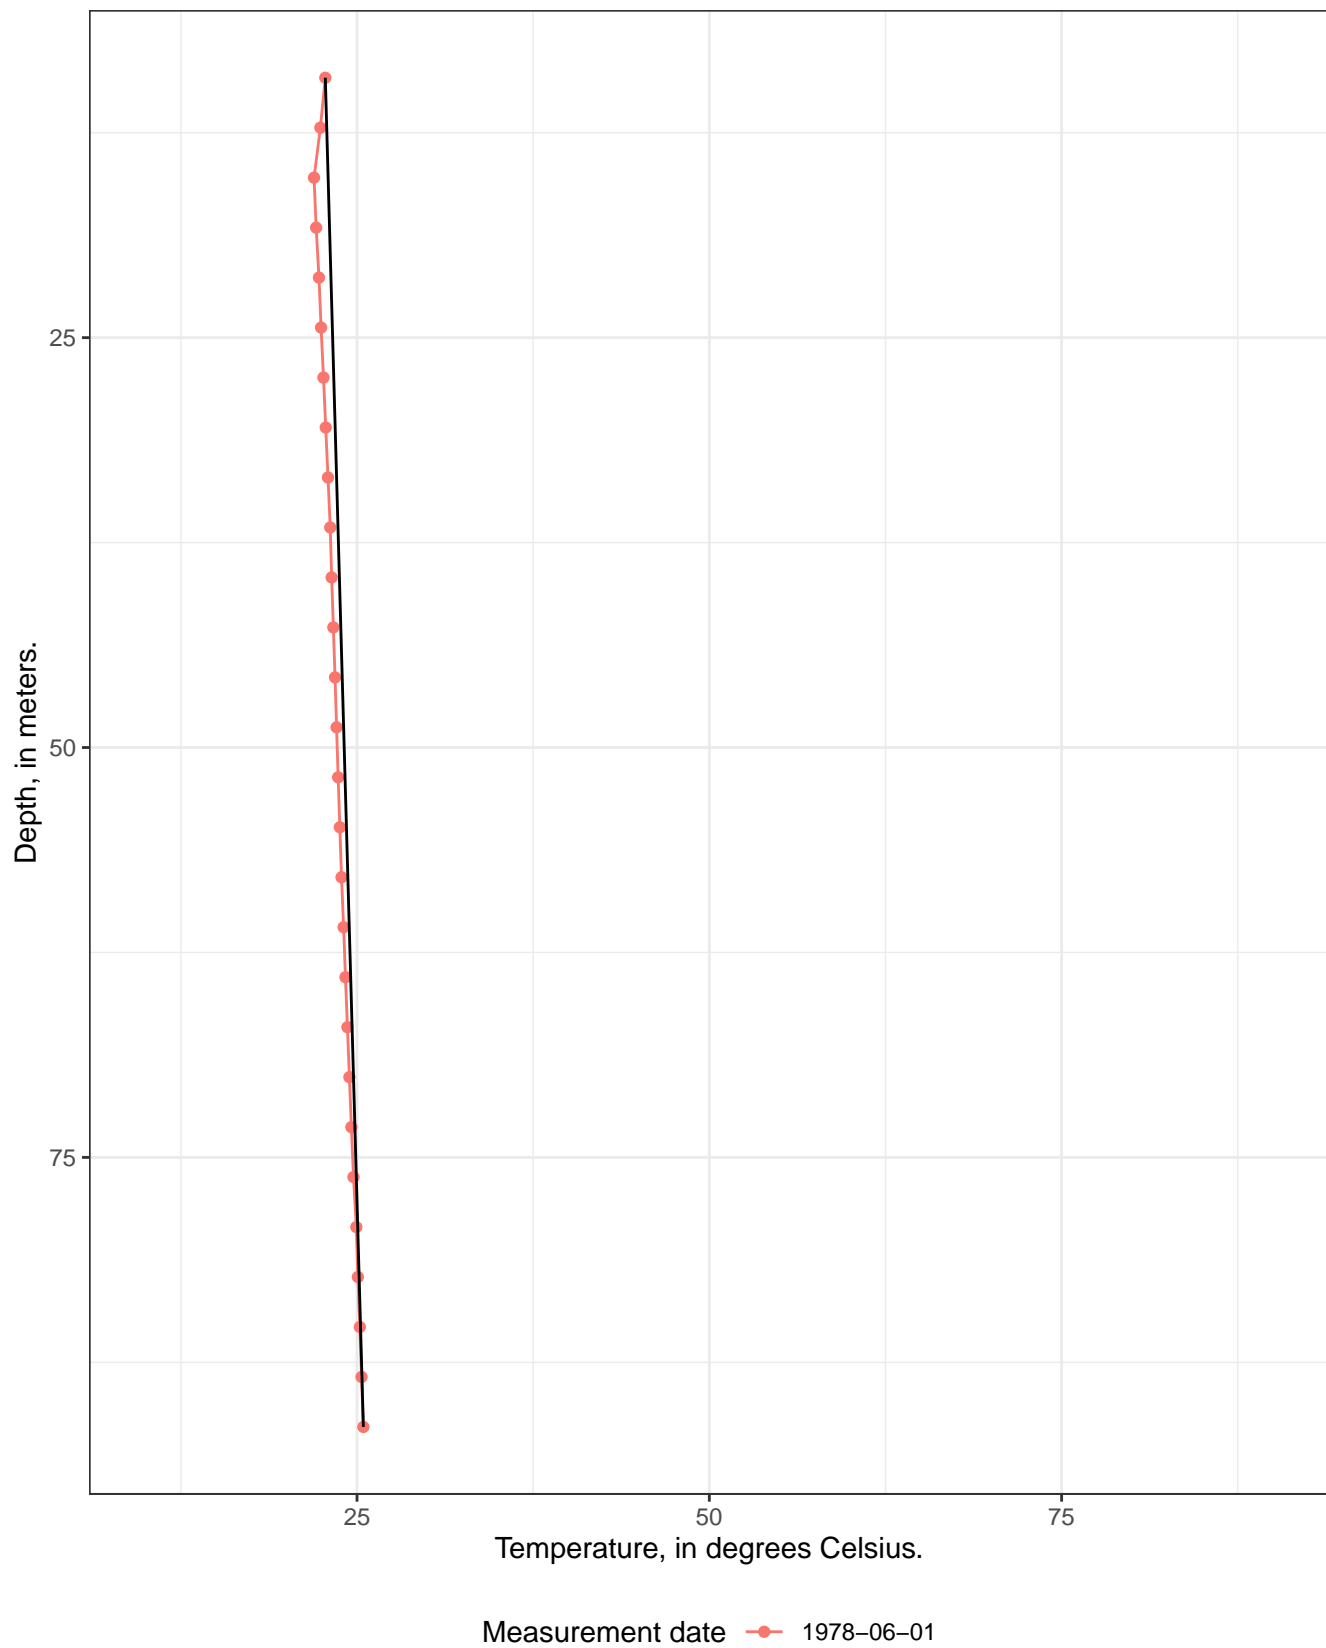

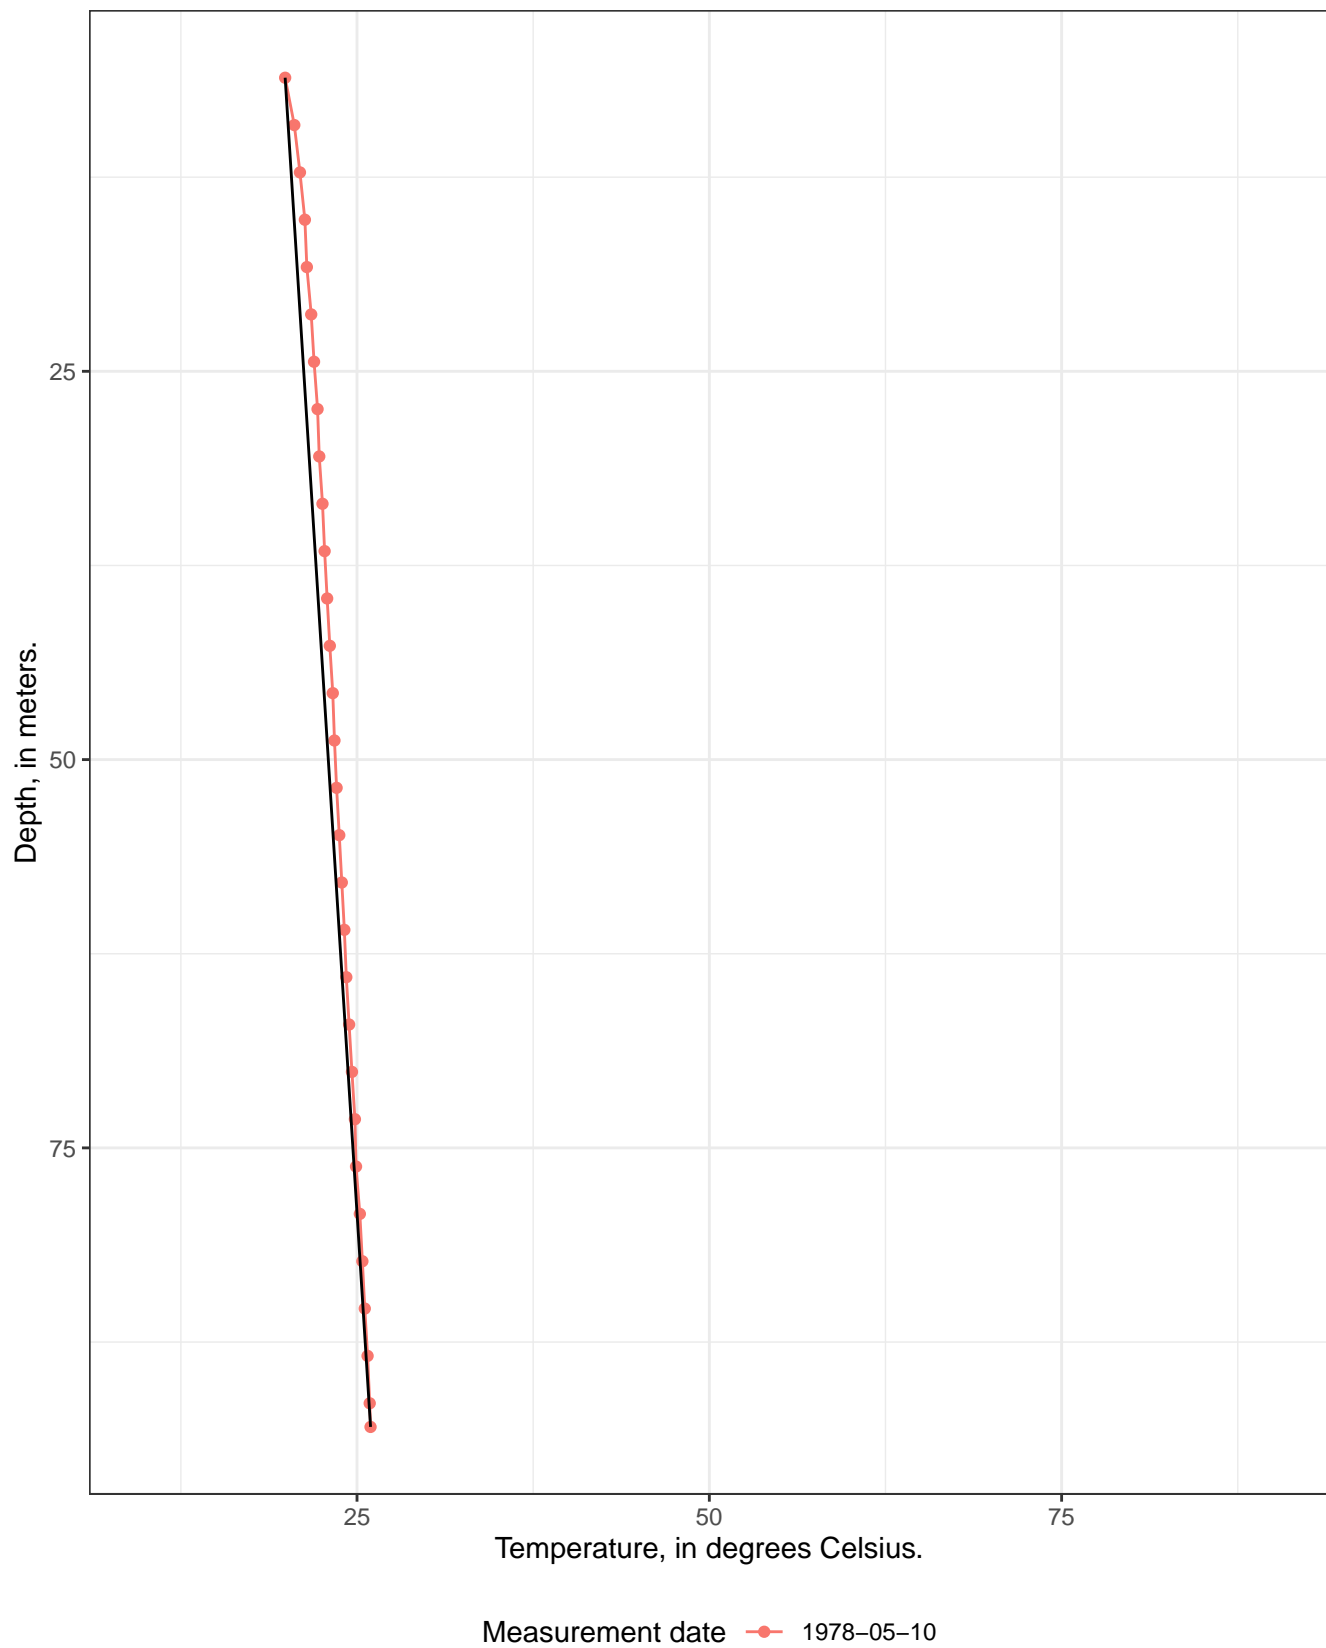

ID: 55 [DA-1]

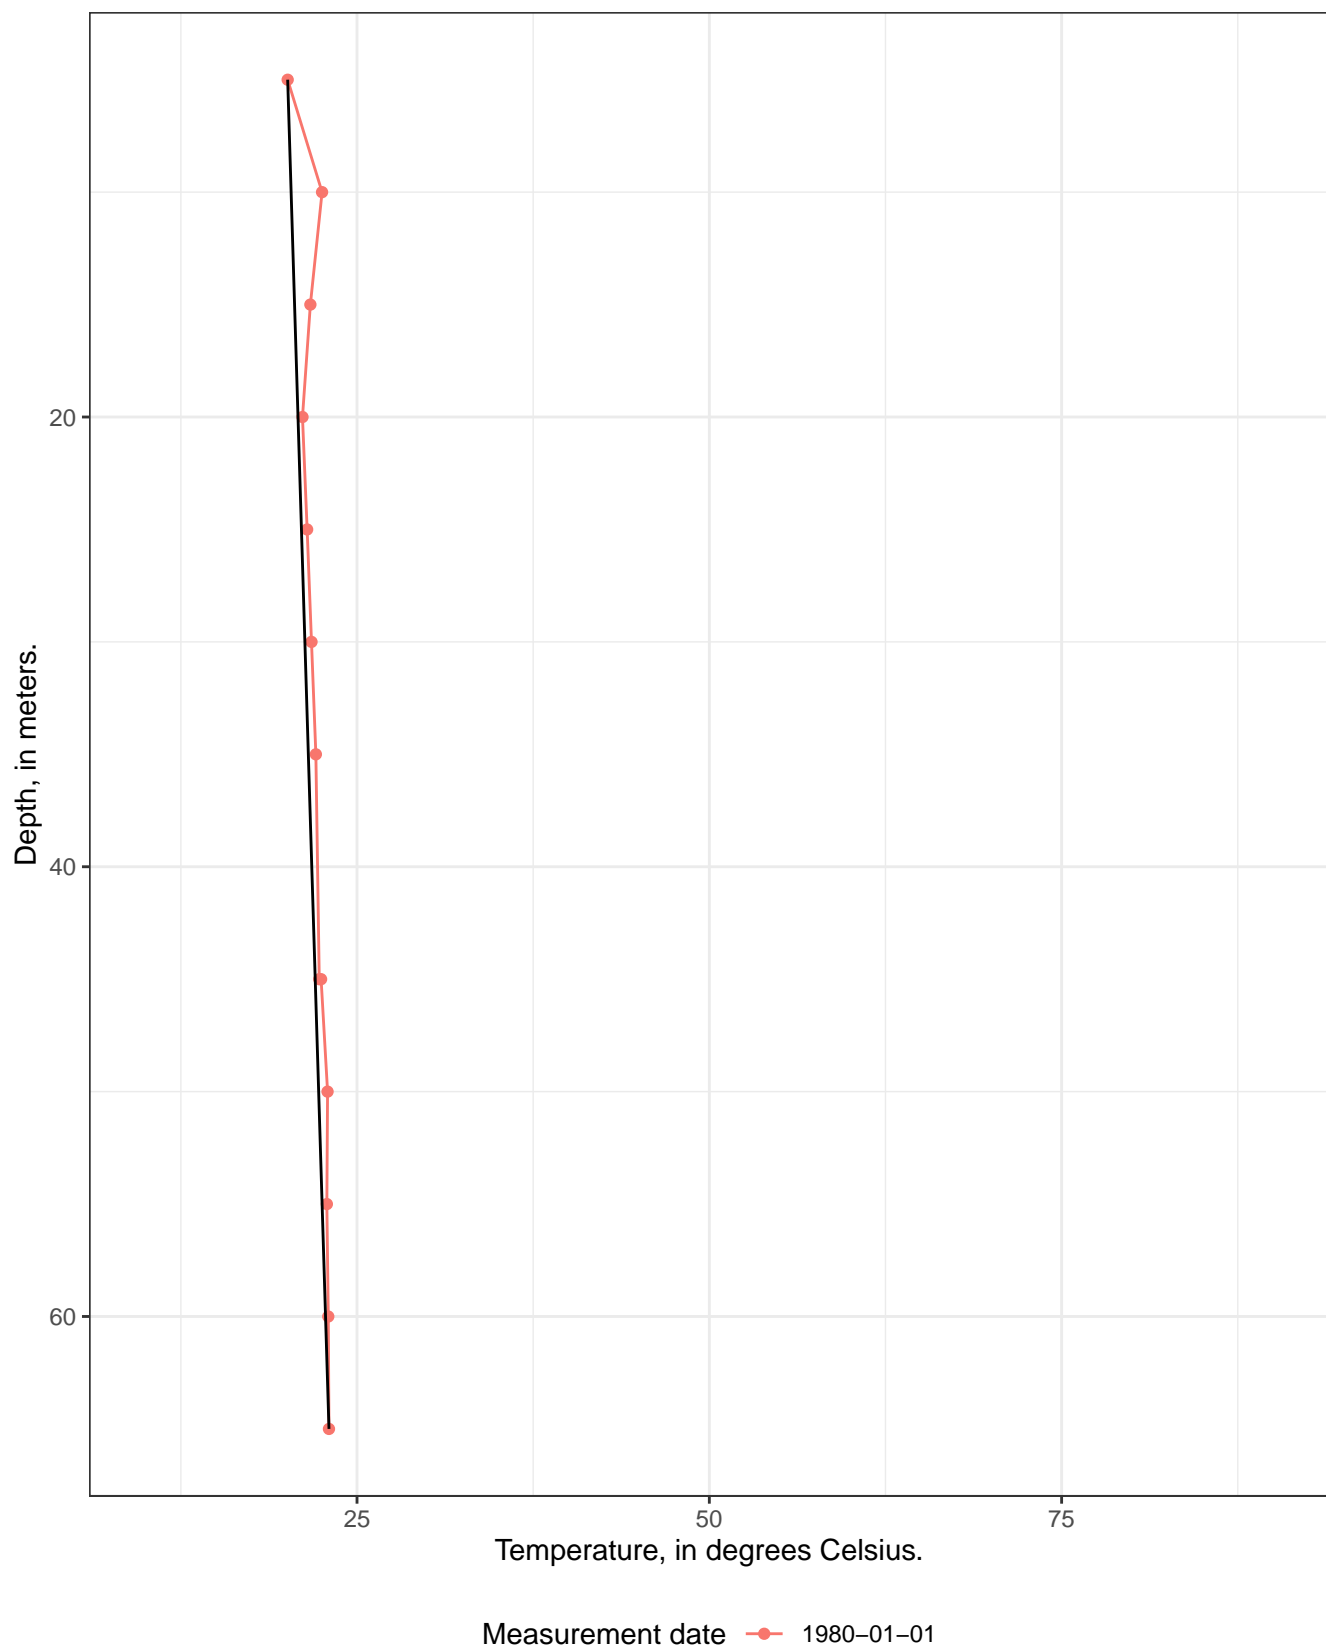



ID: 56 [DA-14]

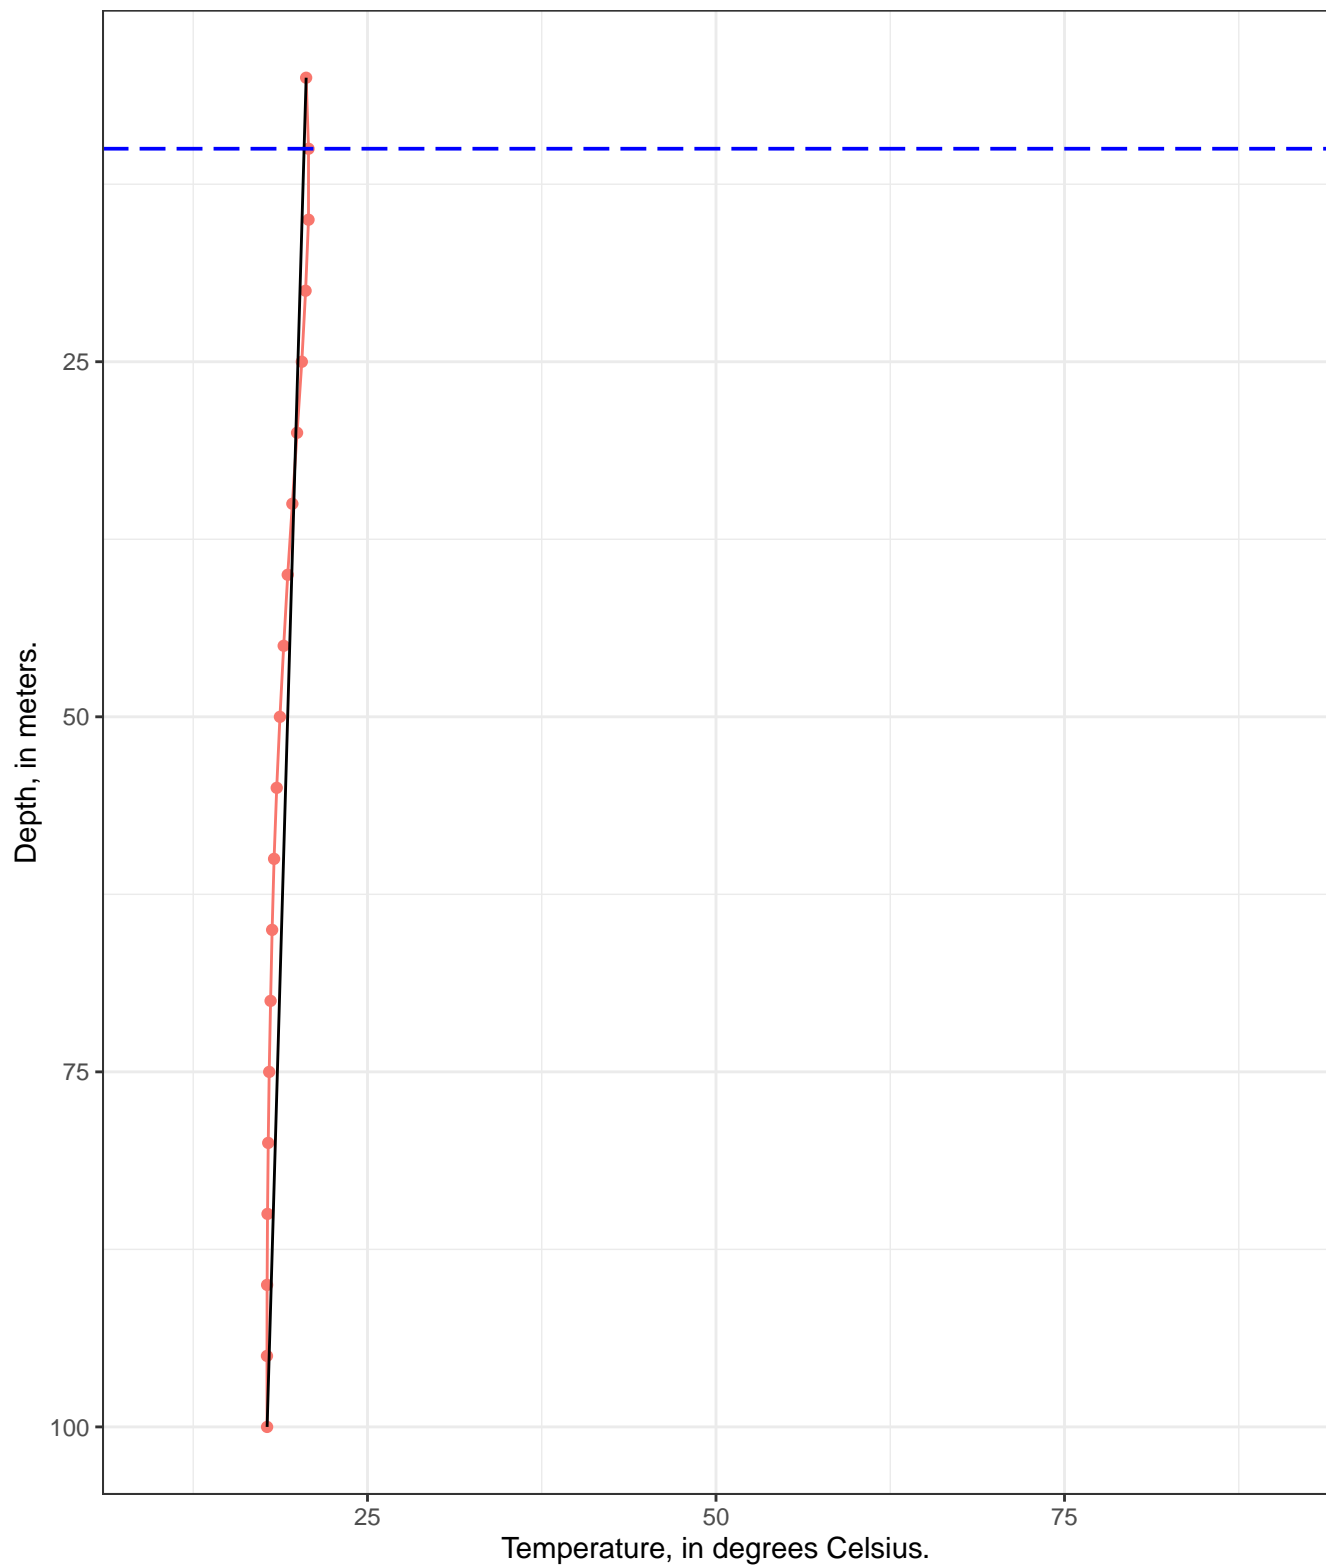

ID: 57 [DA-2]

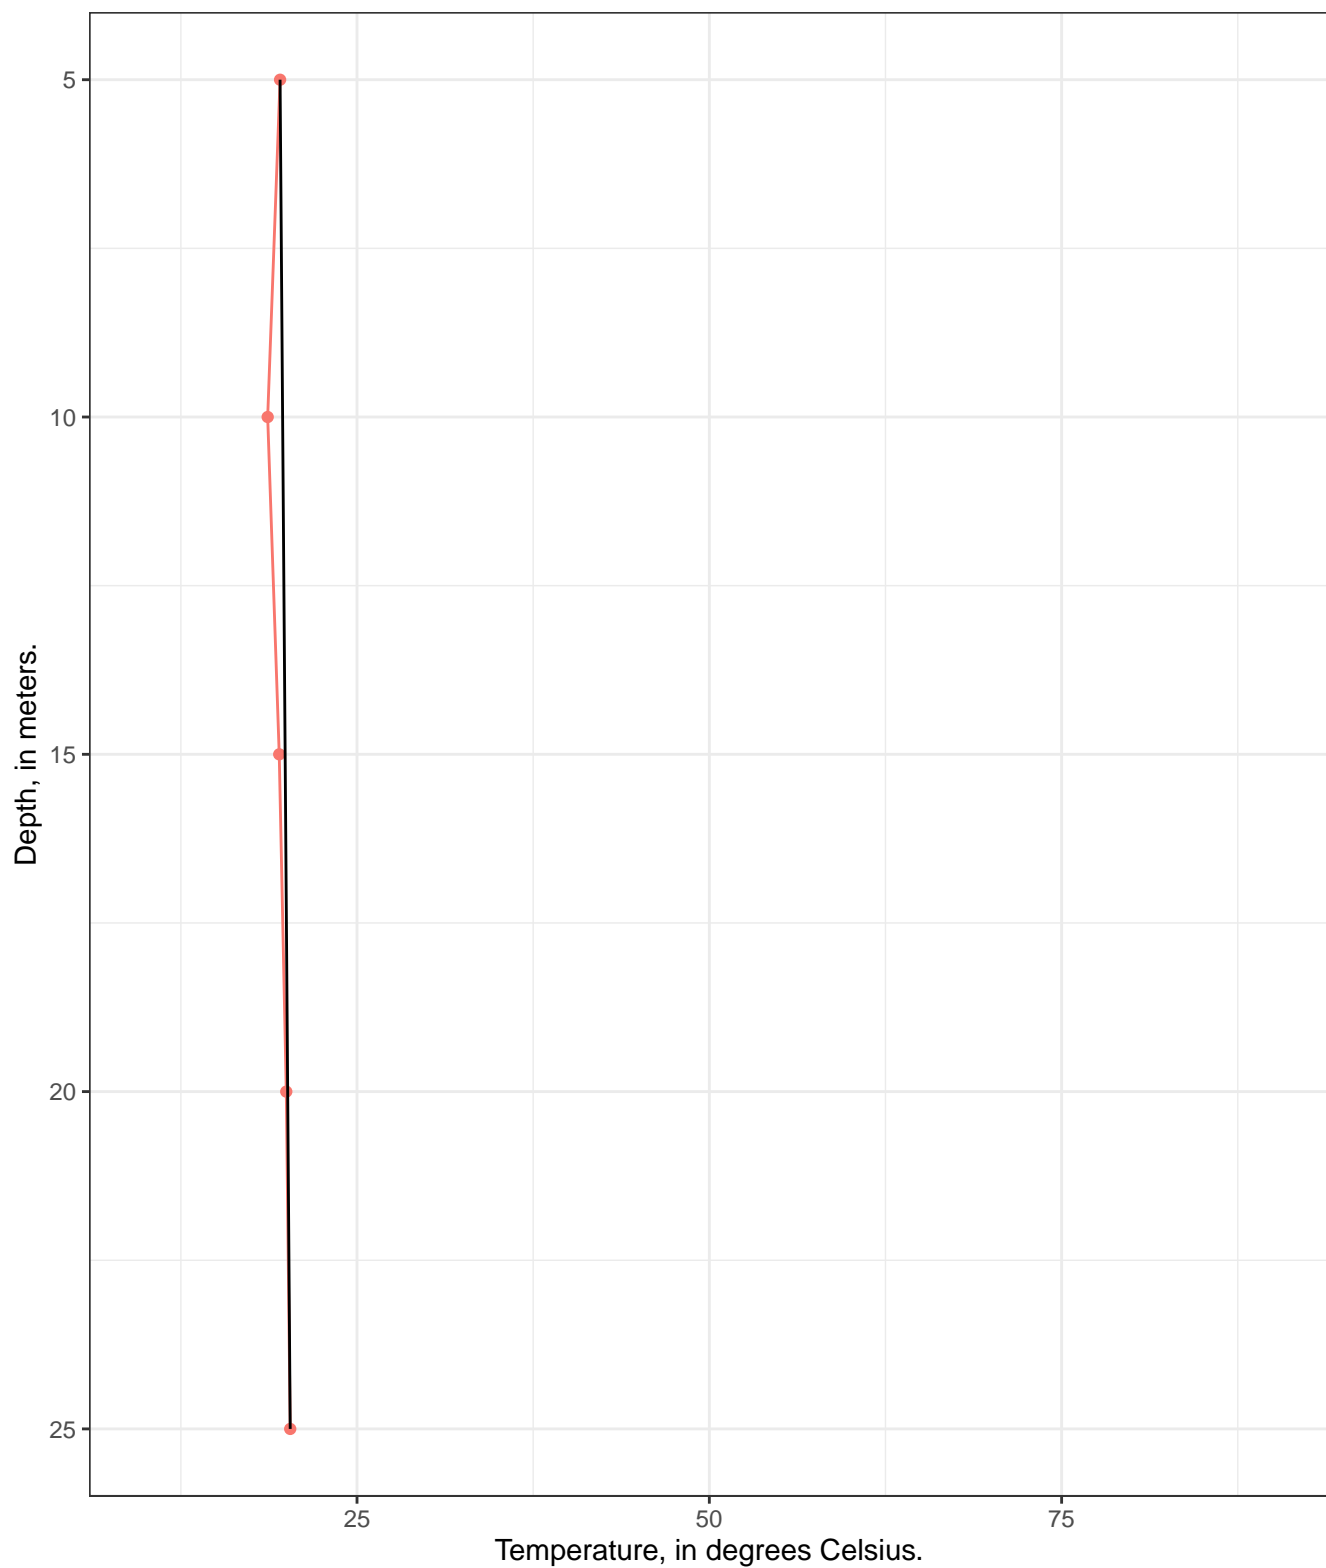

Measurement date 1980-01-01

ID: 58 [DA-3]

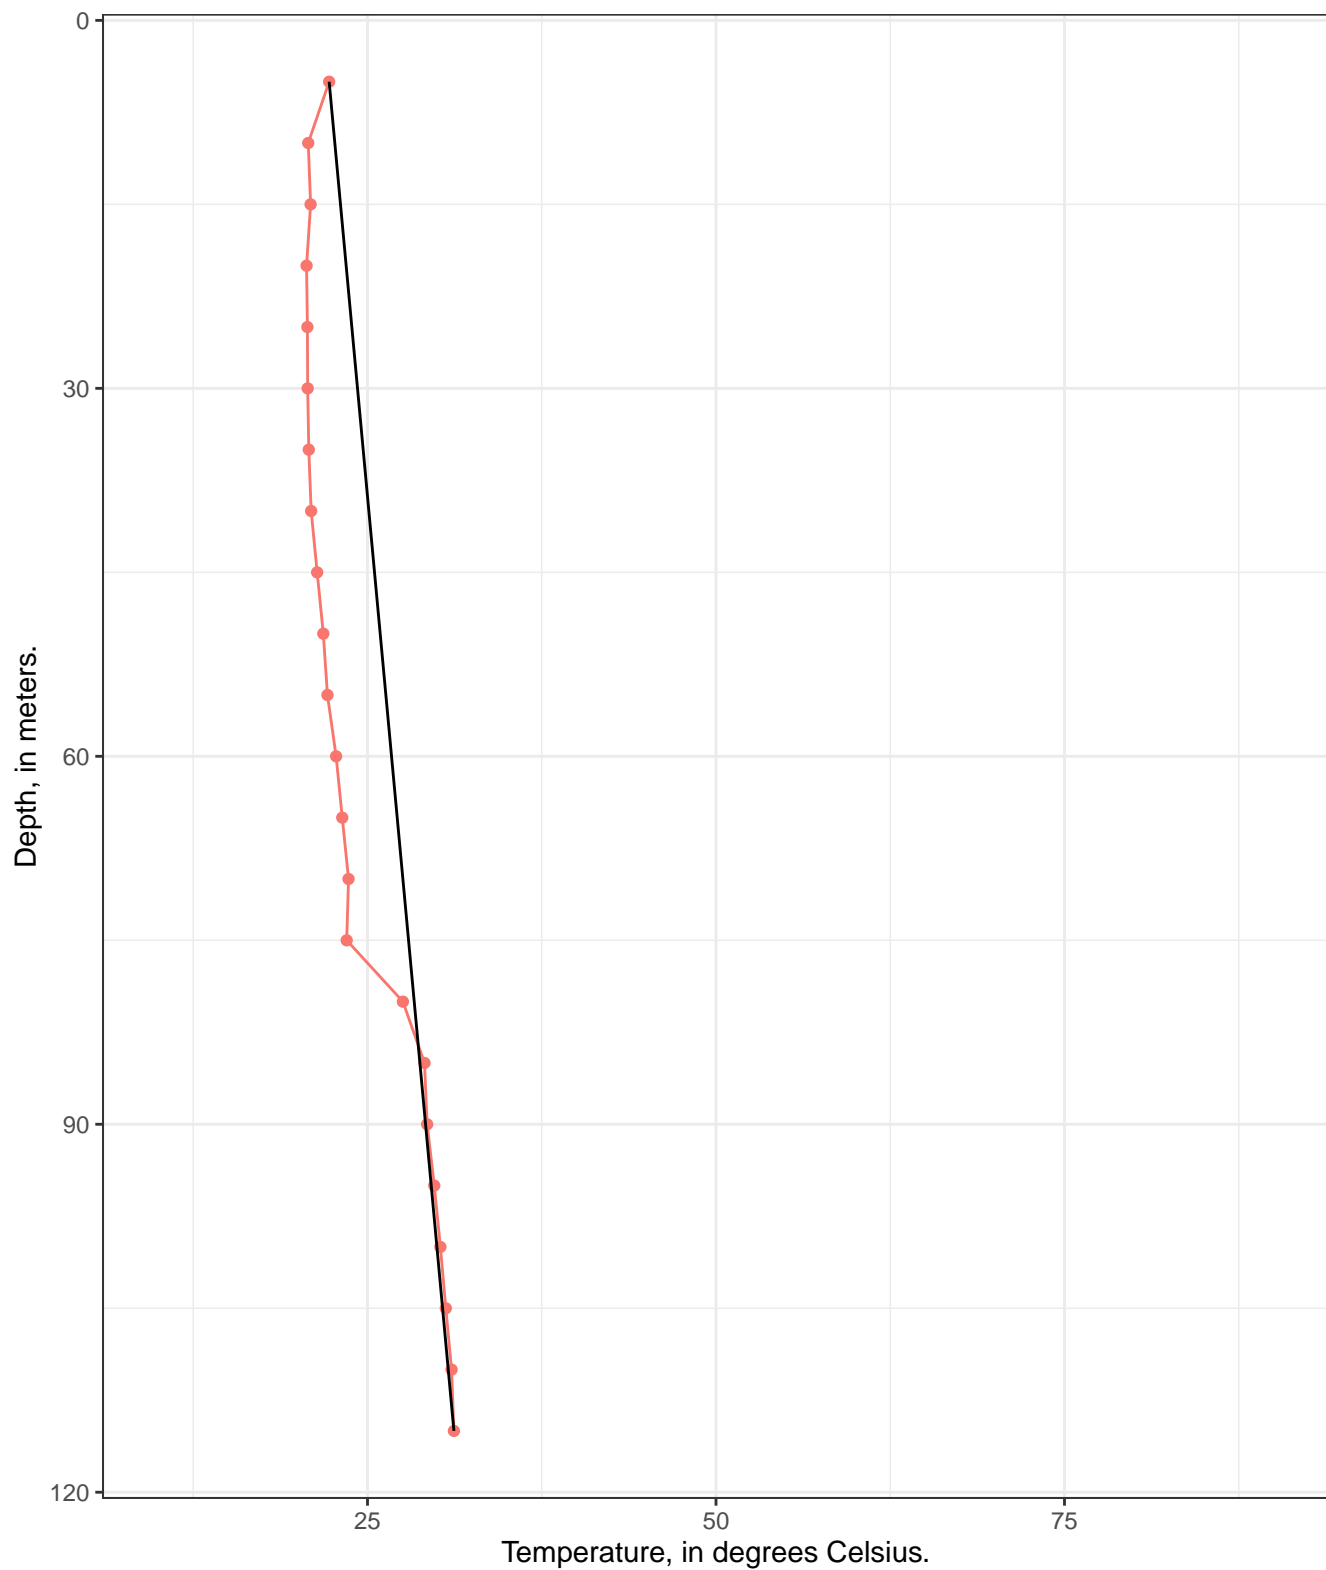

Measurement date 1980-01-01

ID: 59 [DA-4]

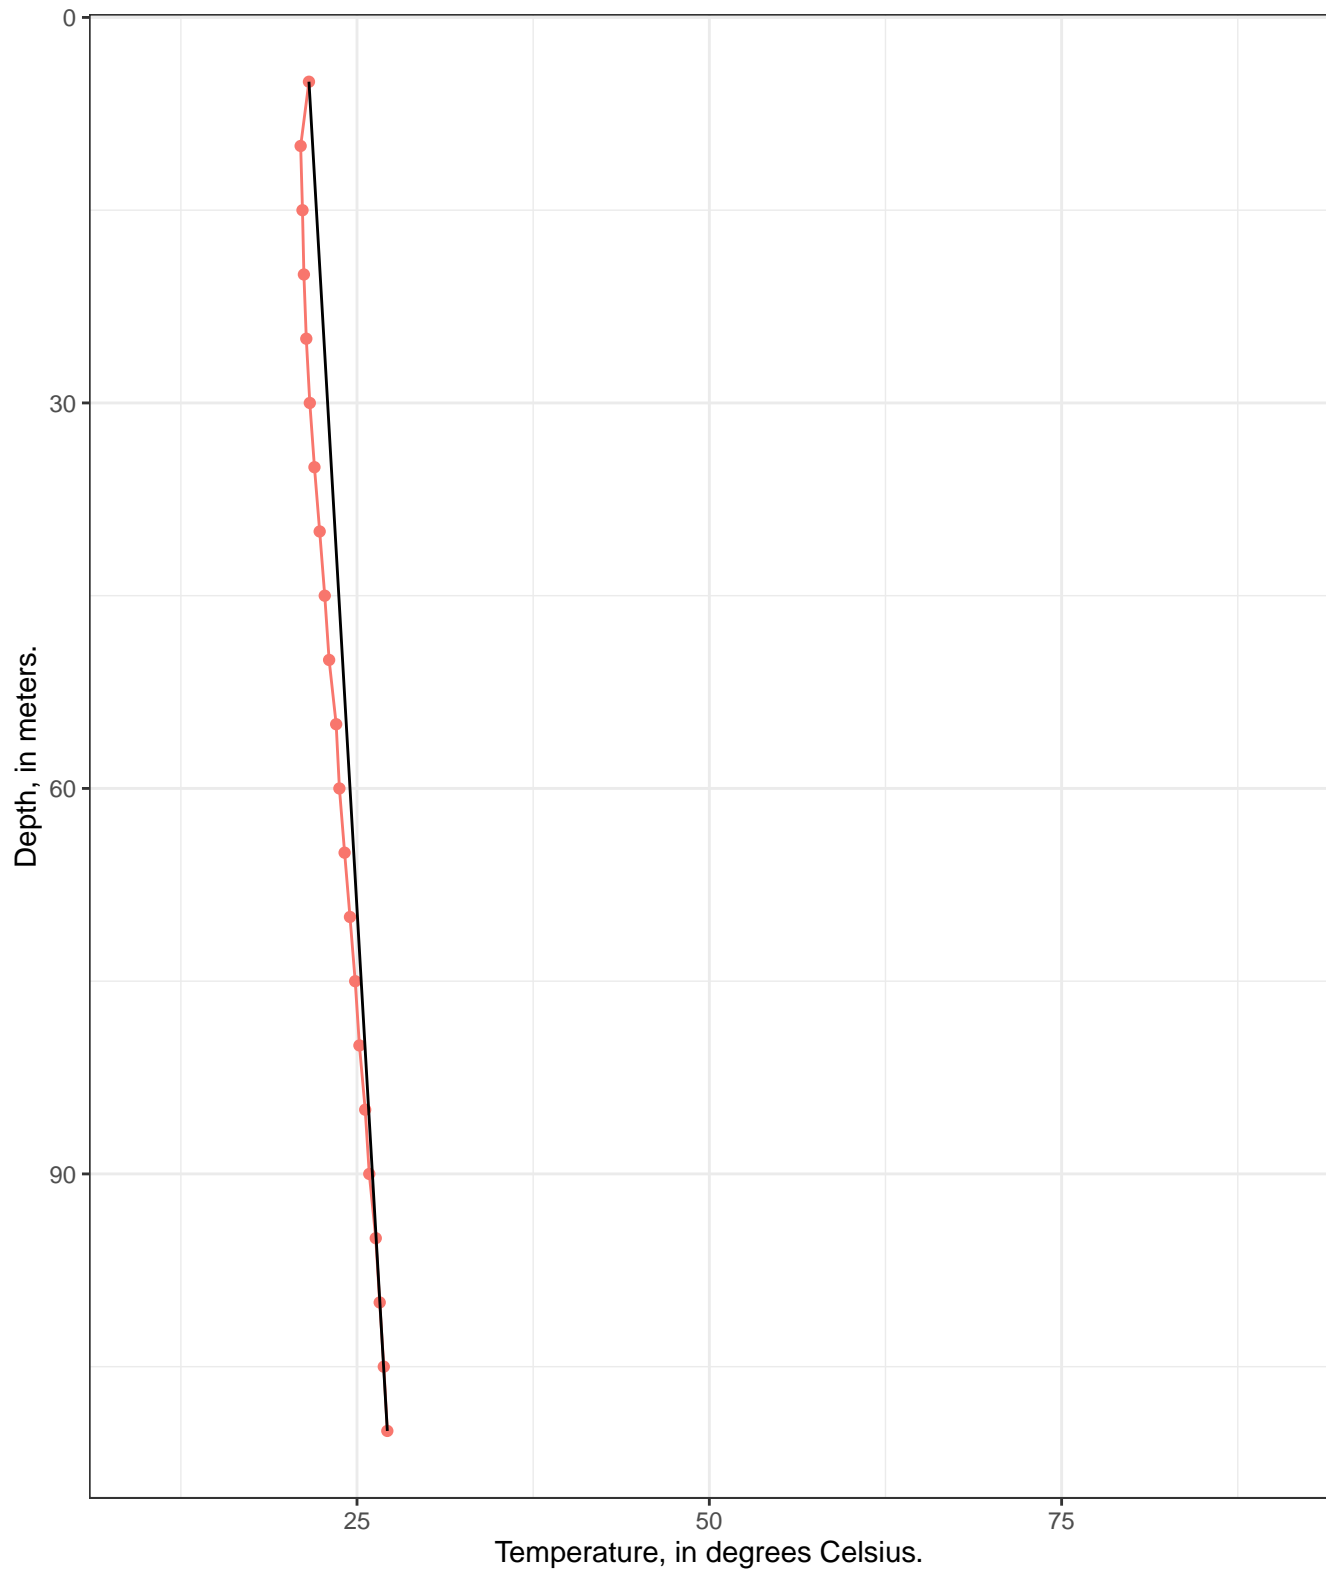

Measurement date 1980-01-01

ID: 60 [DA-5]

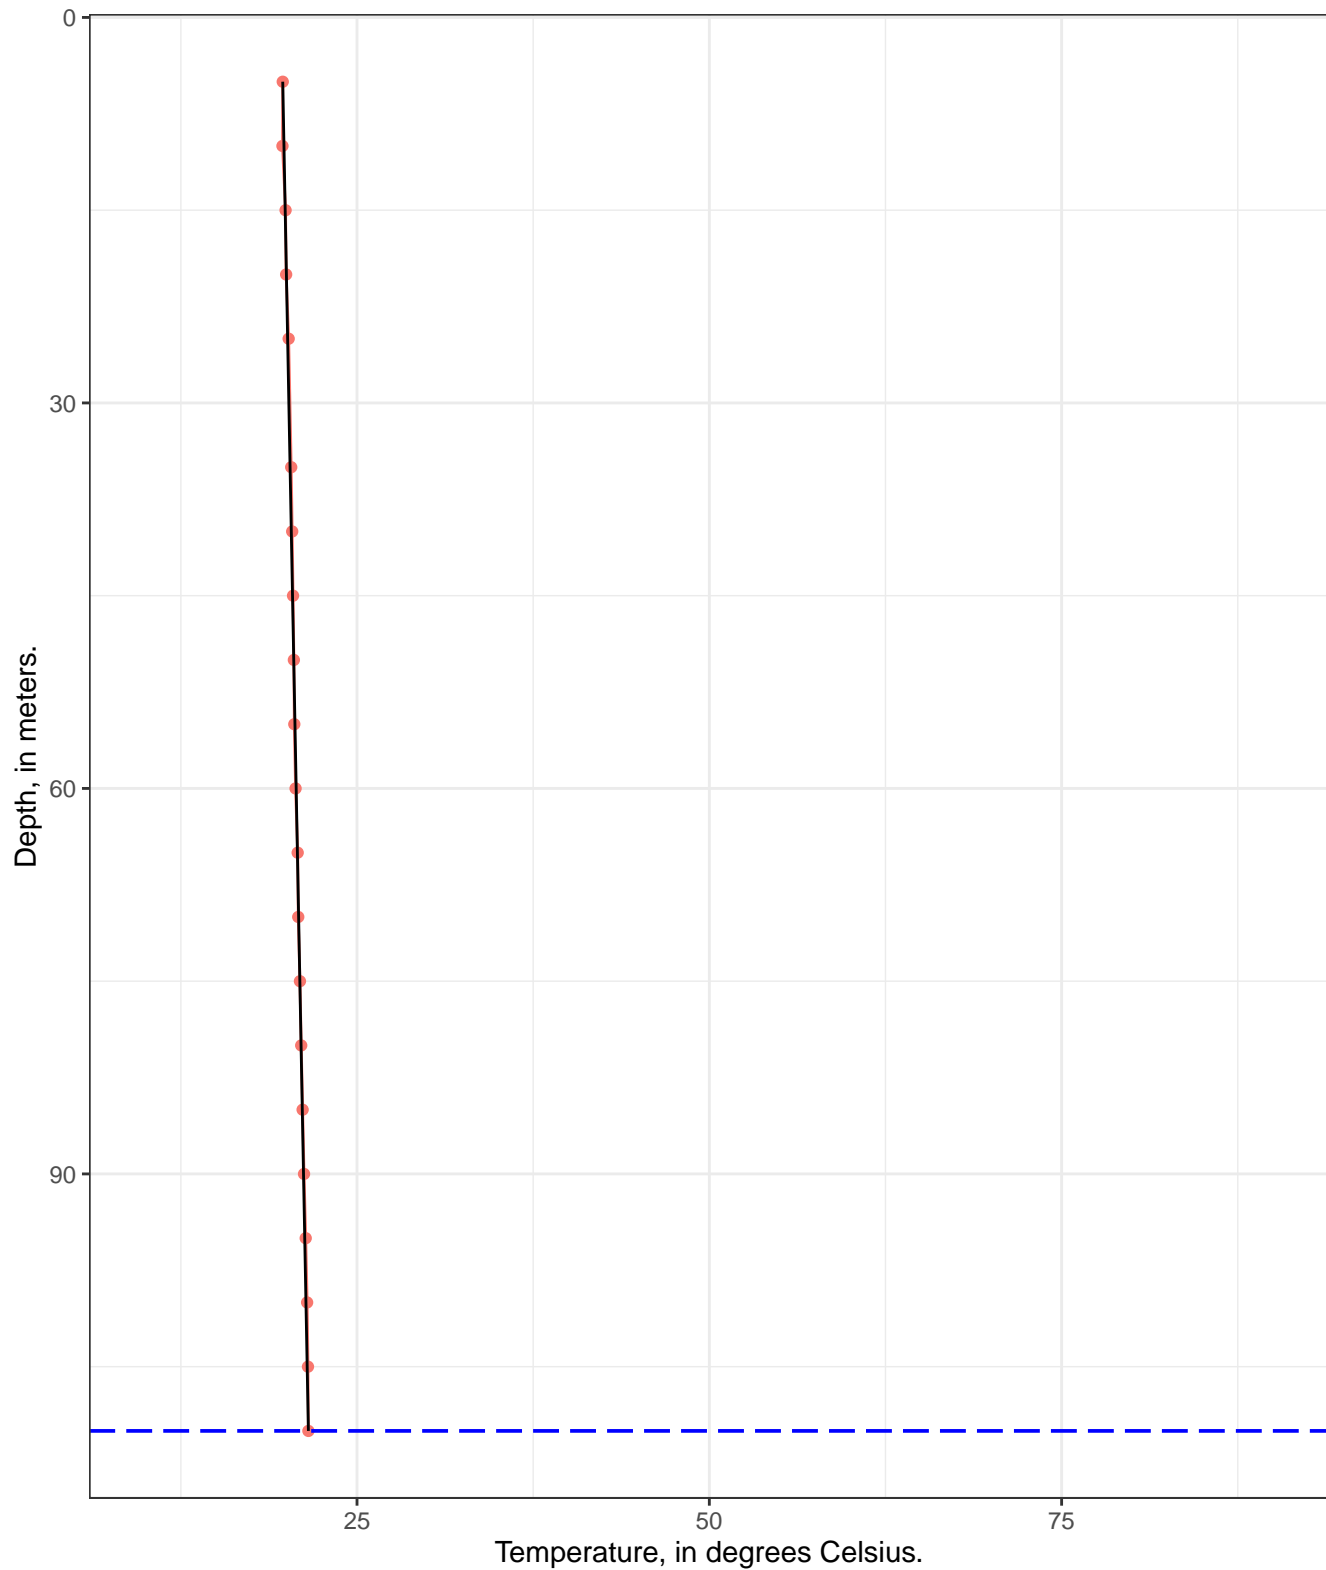

ID: 61 [DA-6]

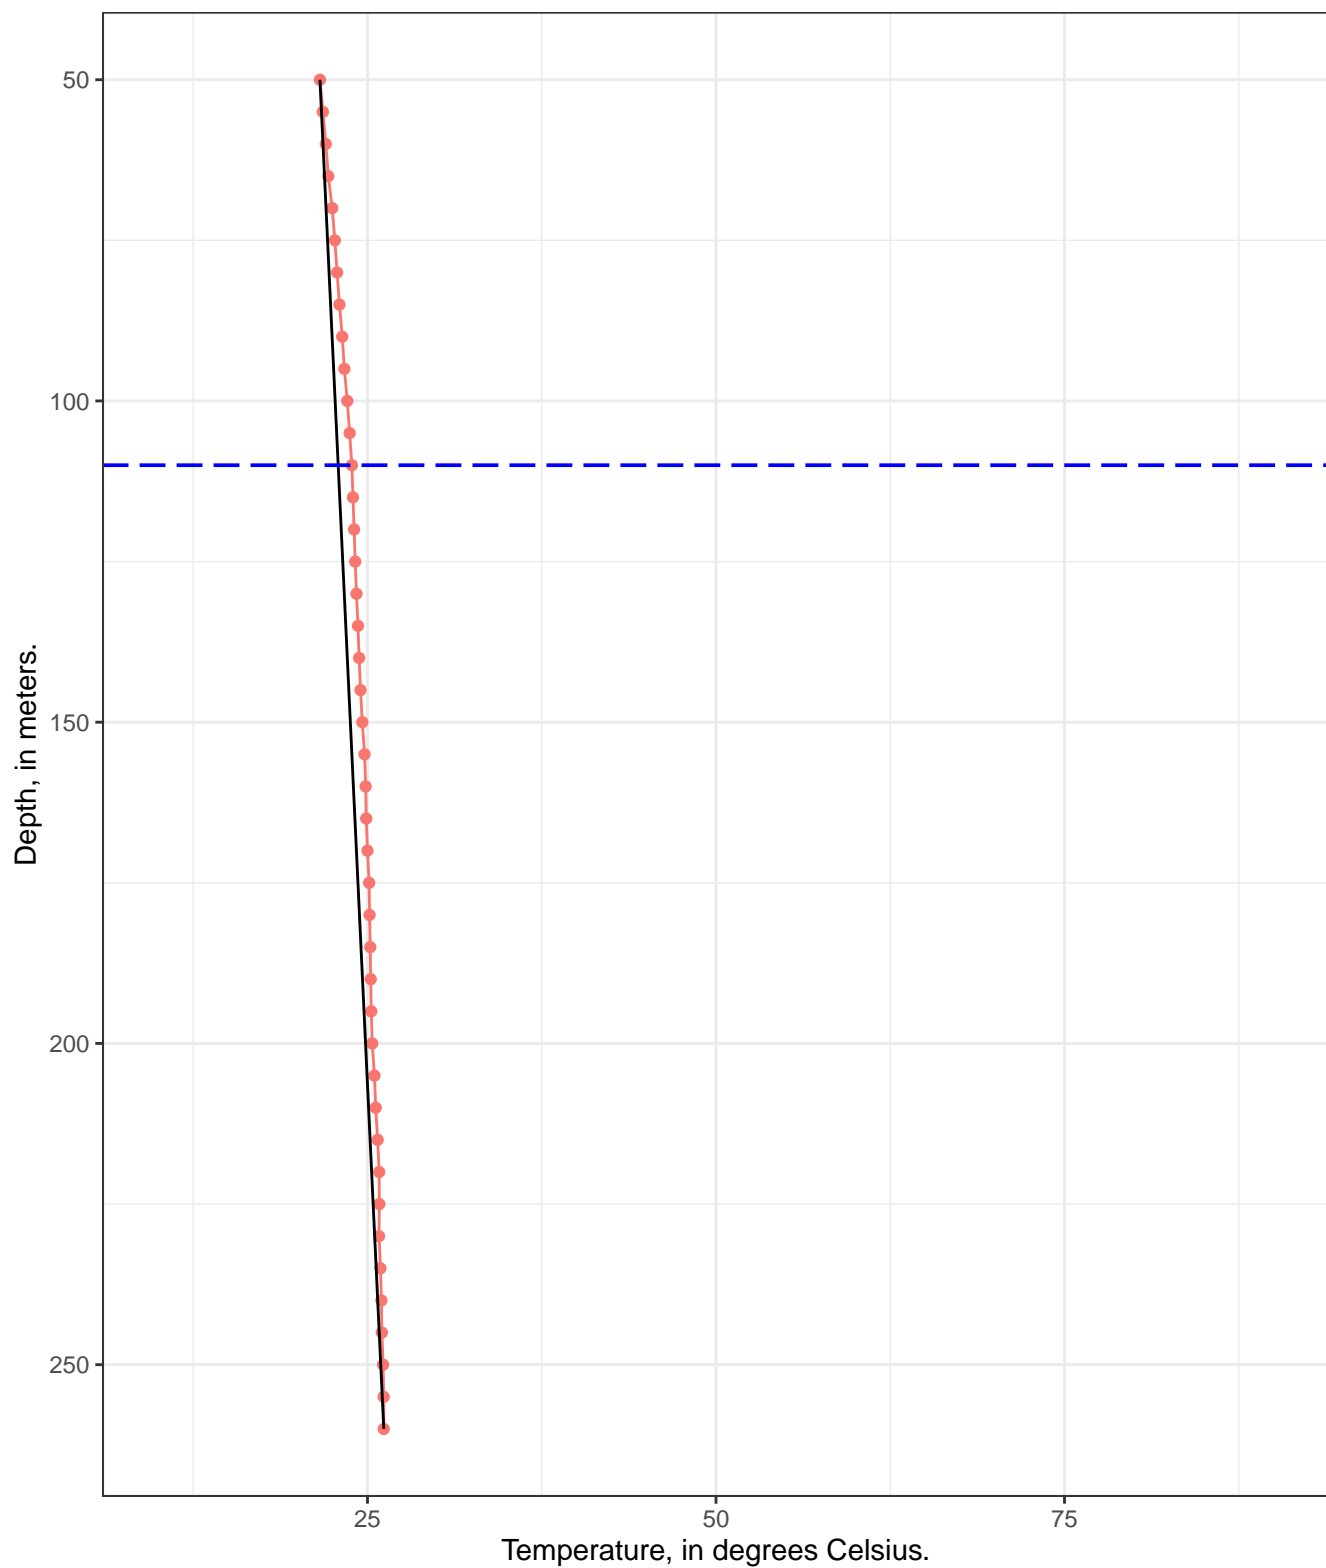

ID: 62 [DA-7]

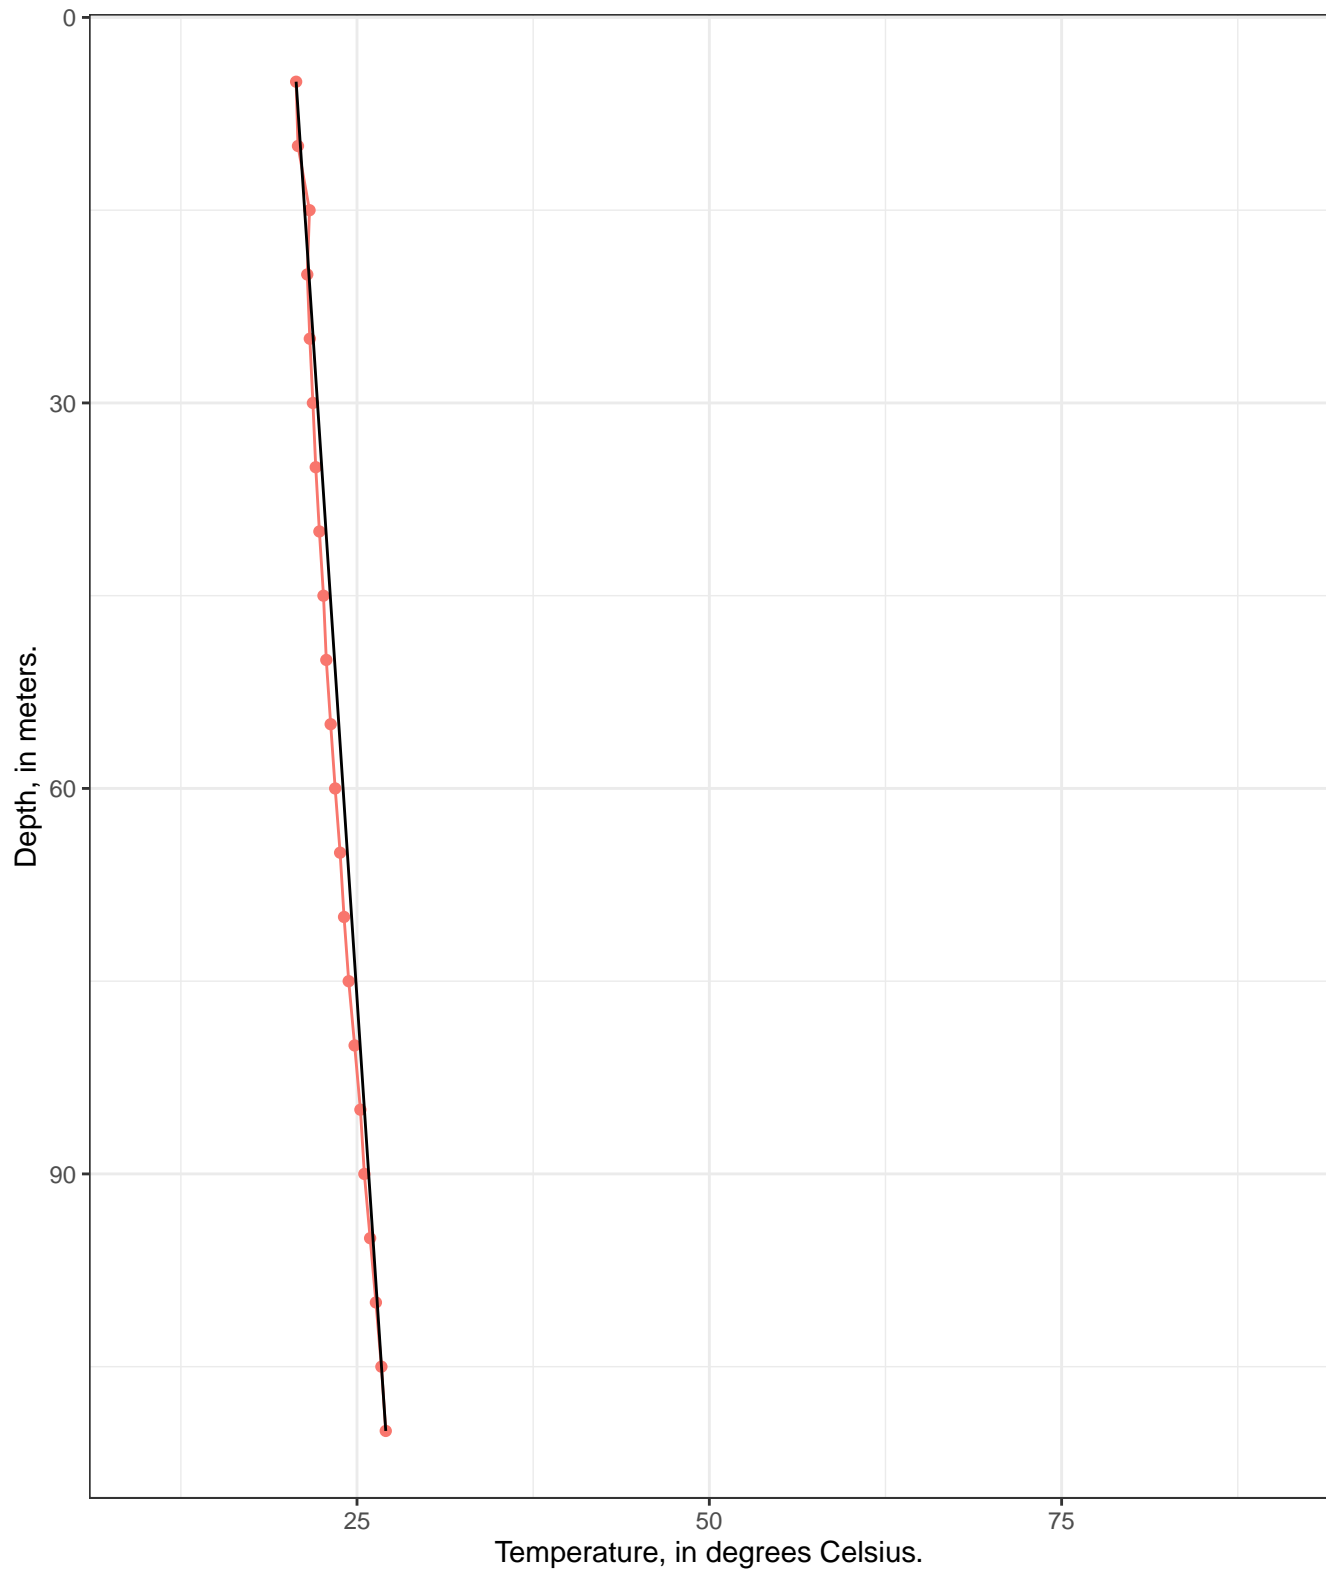

ID: 63 [DA-8]

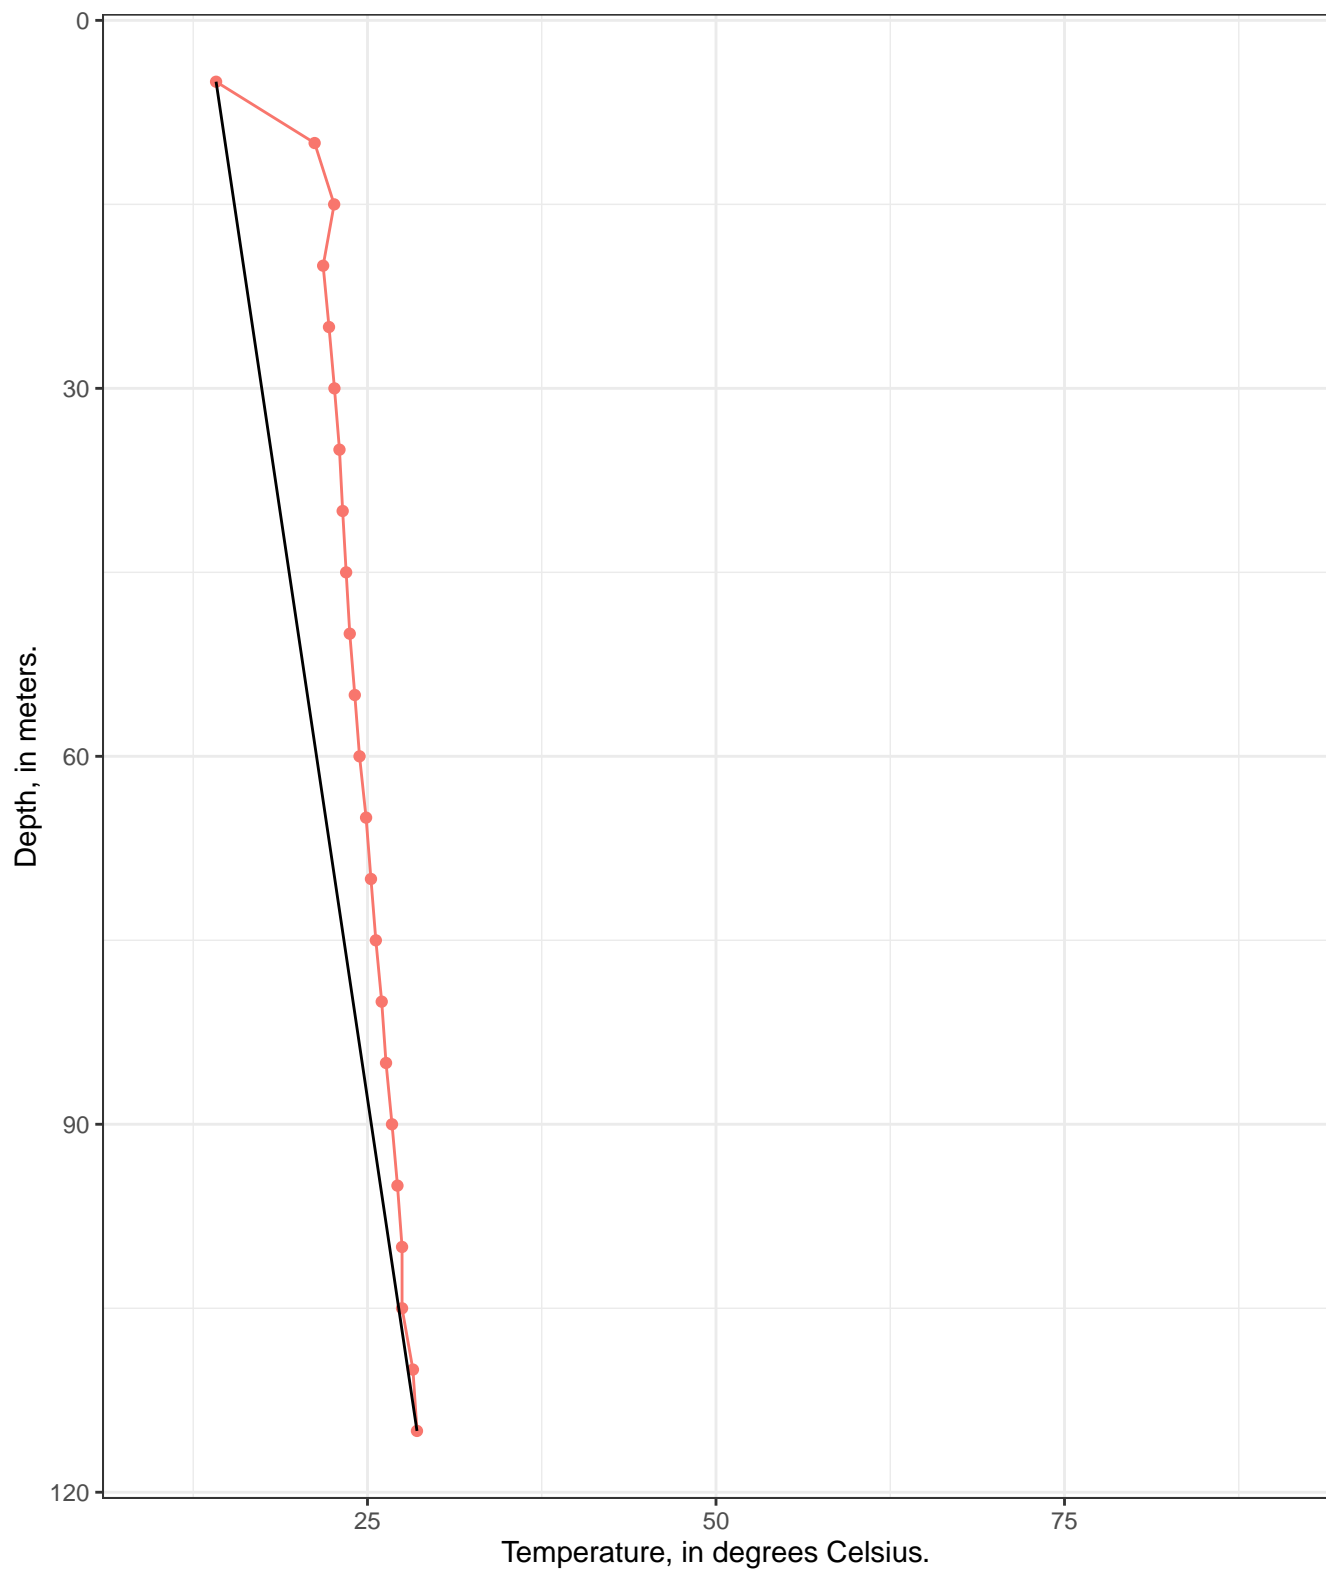

Measurement date 1980-01-01



ID: 64 [DA-9]

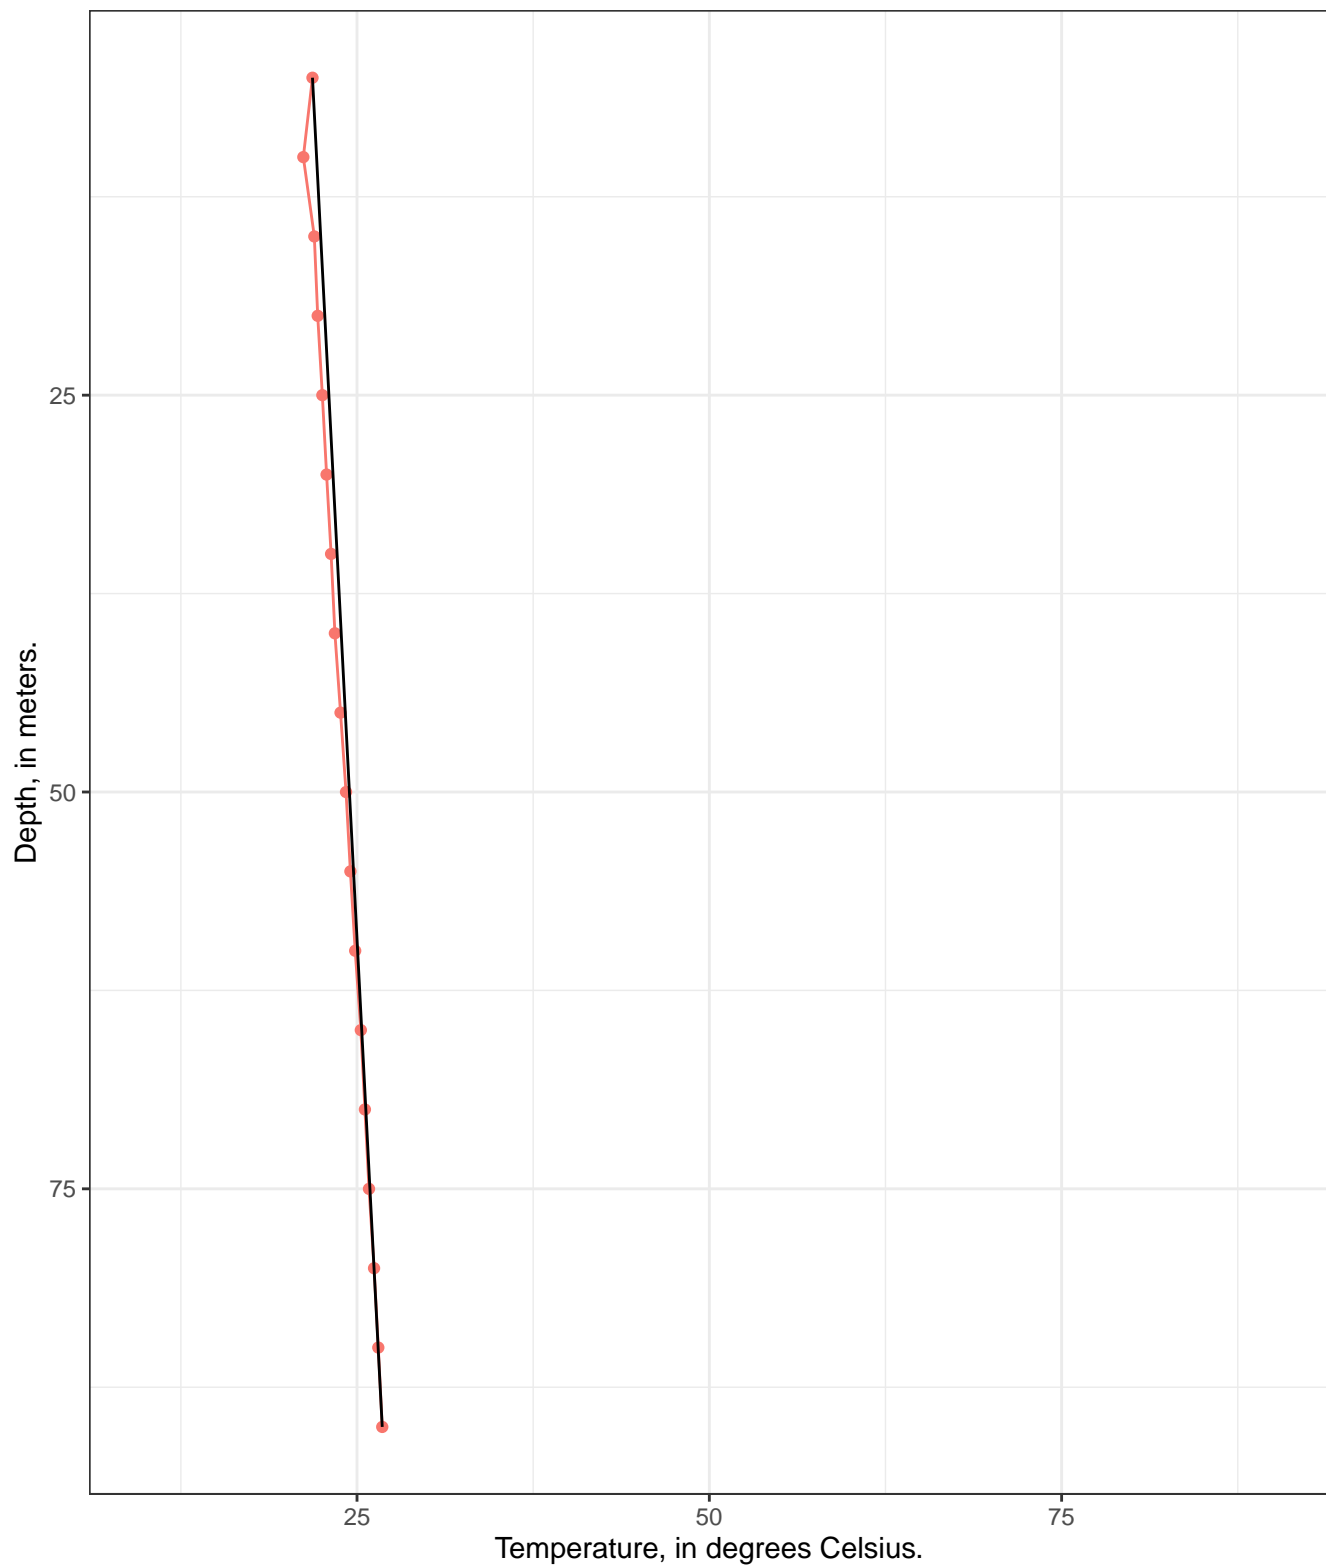

Measurement date 1980-01-01

ID: 65 [DT-1\_NMSU-DG-2]

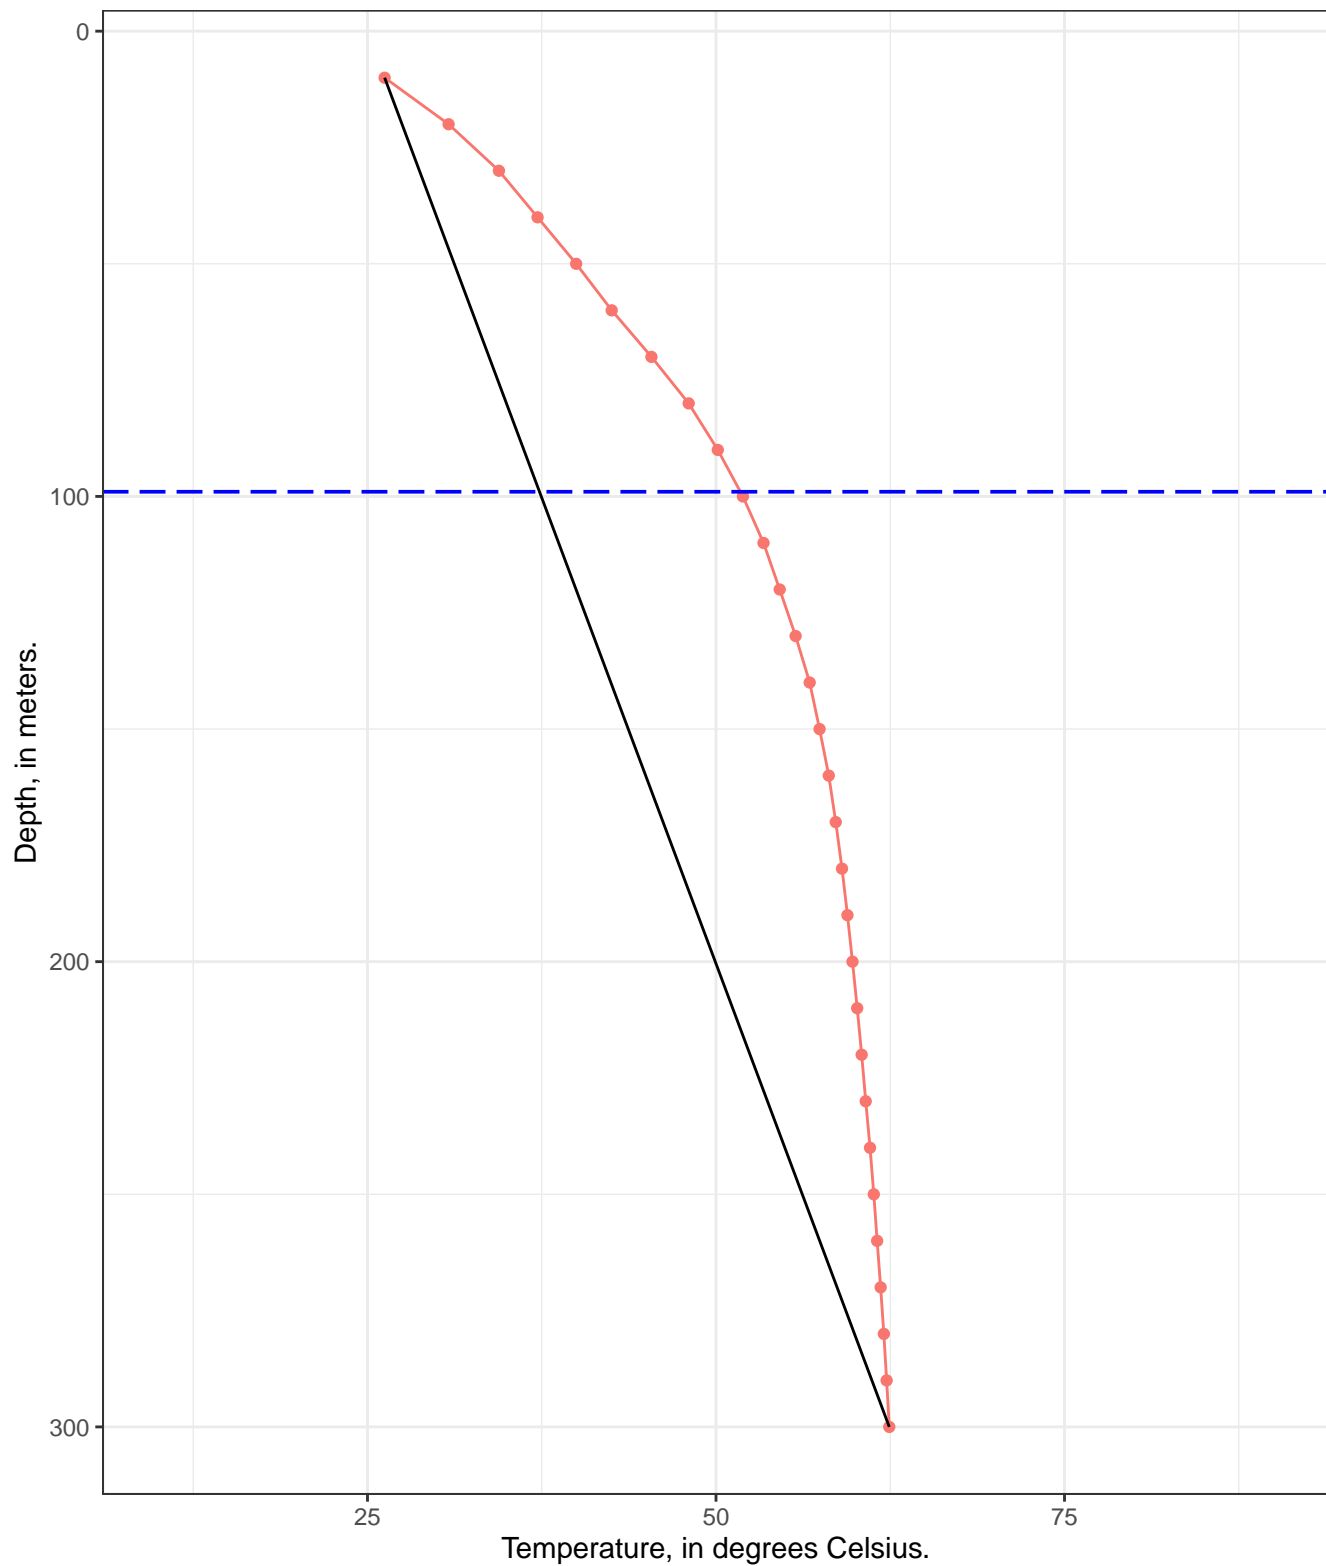

ID: 66 [DT-2\_NMSU-DG-1]

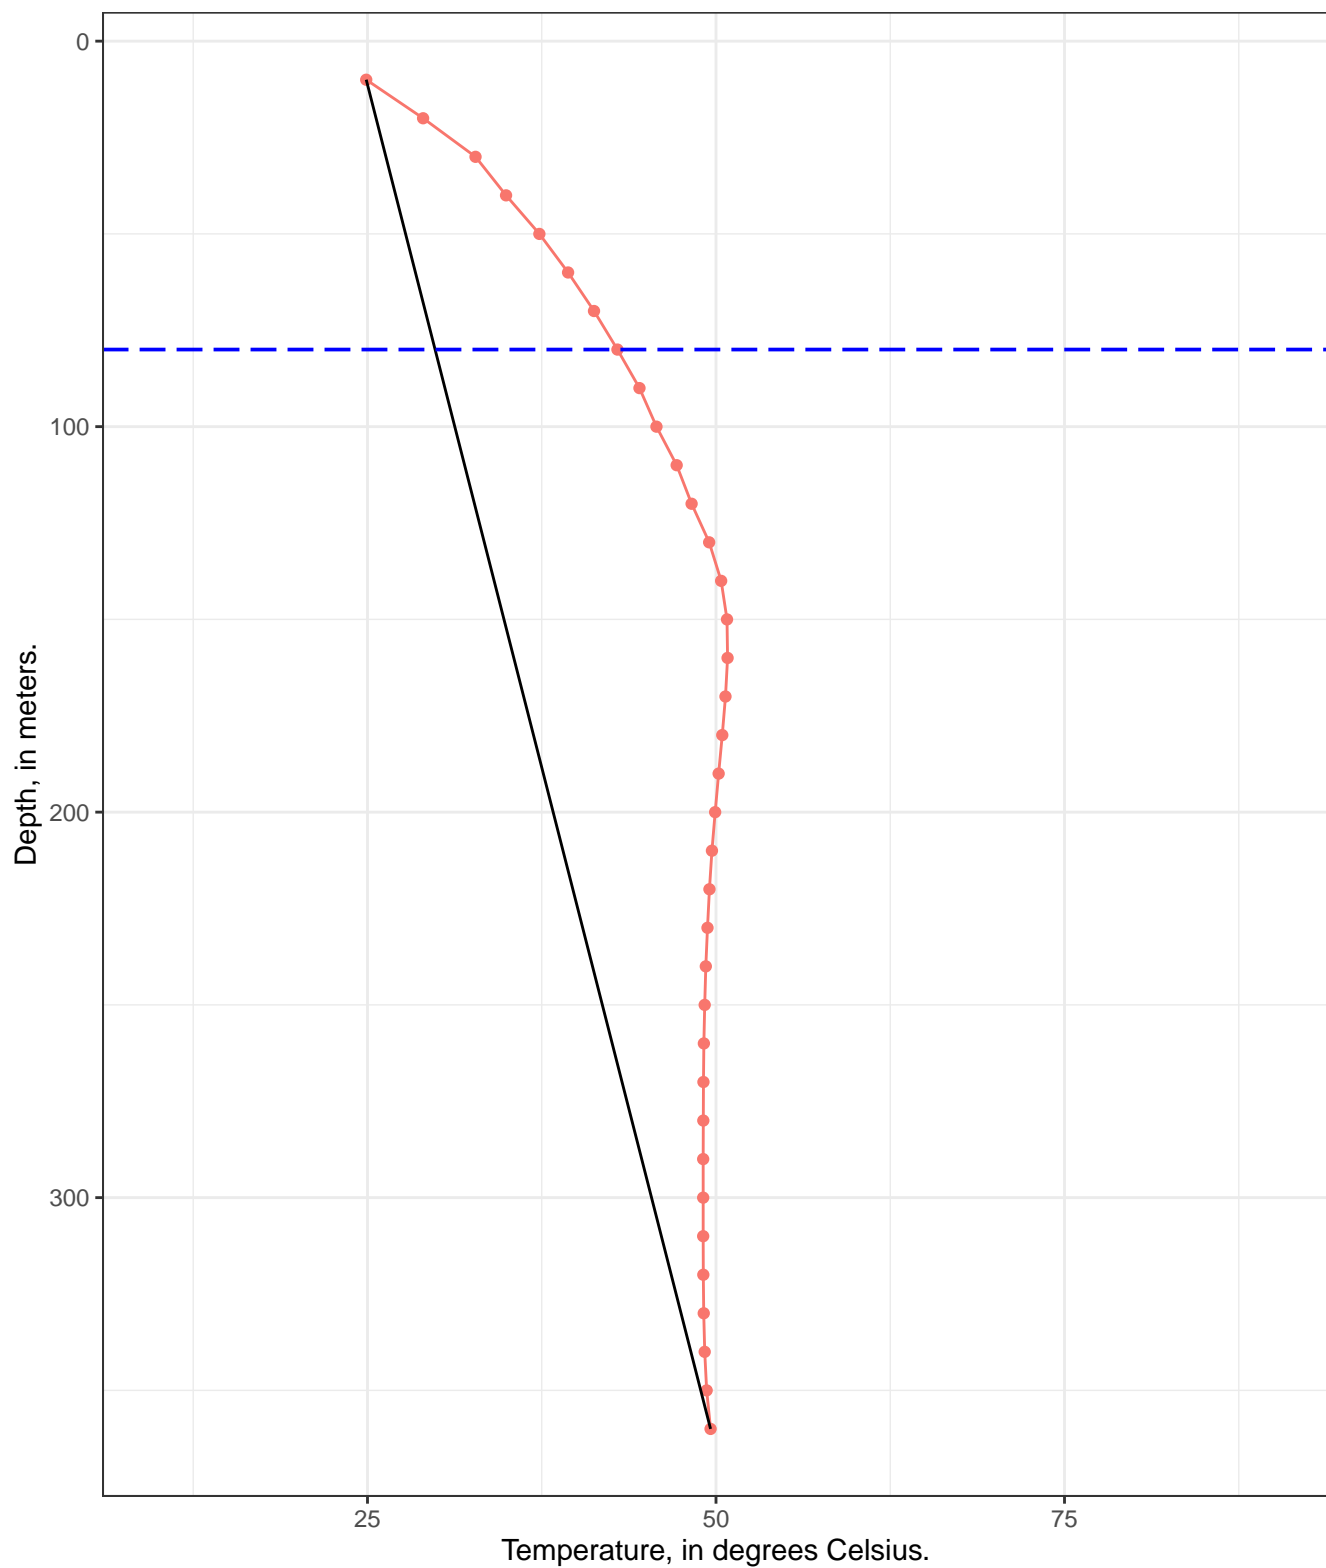

ID: 67 [G\_Well]

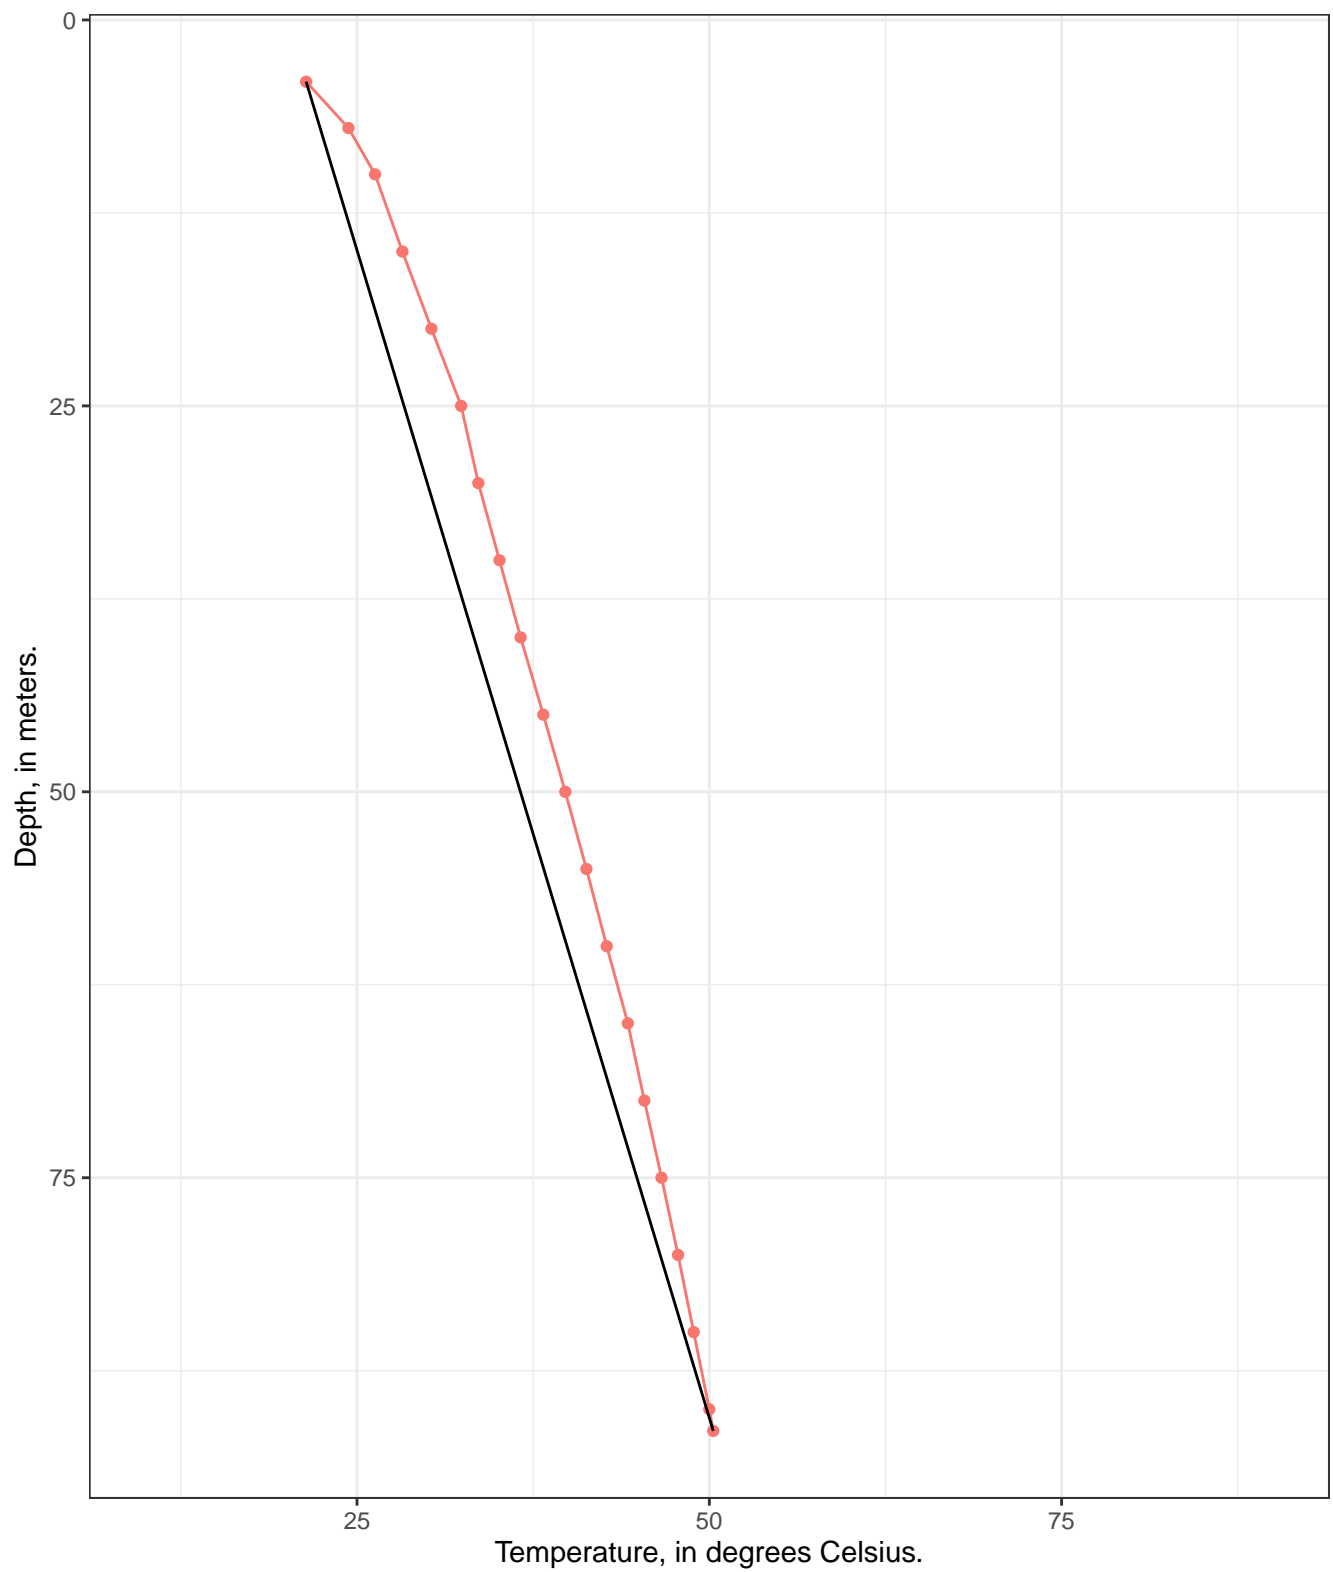

Measurement date 1984-05-04

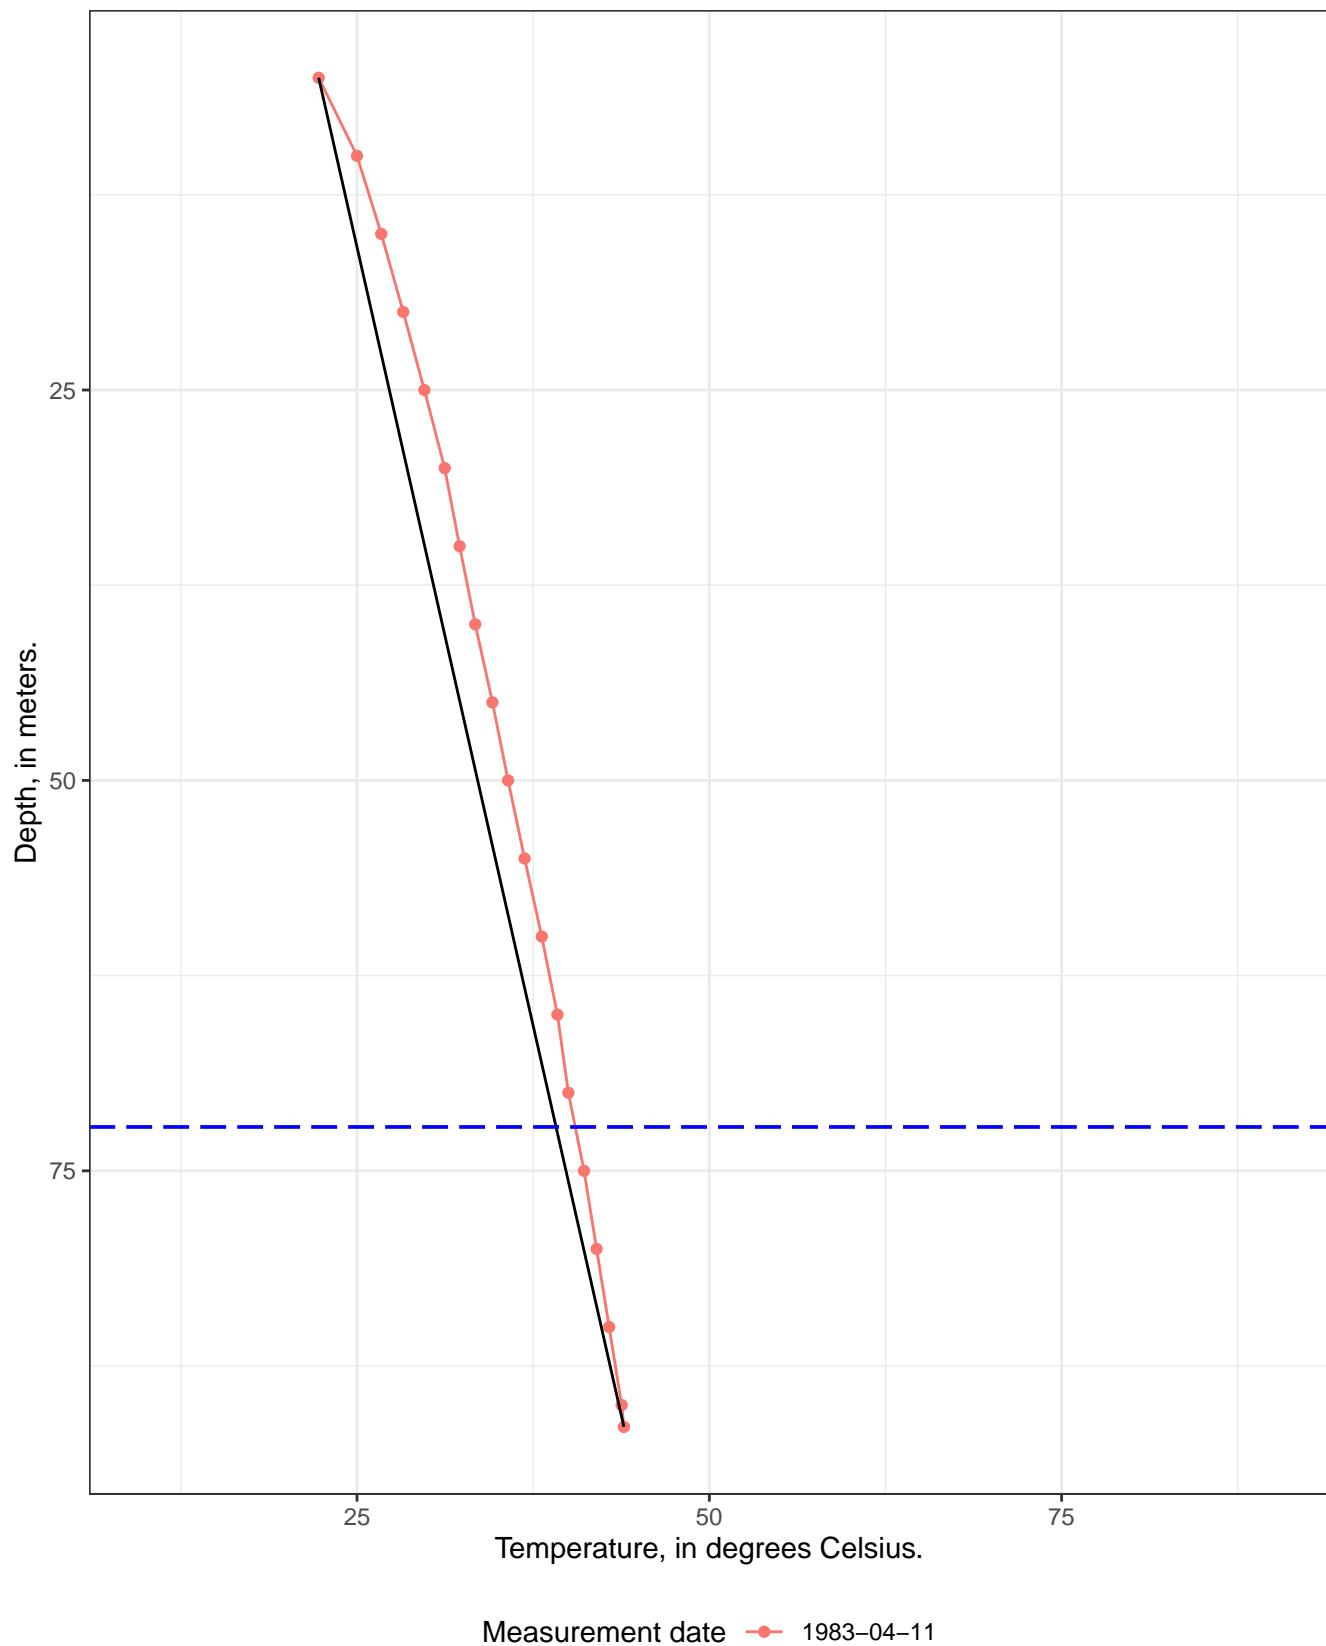

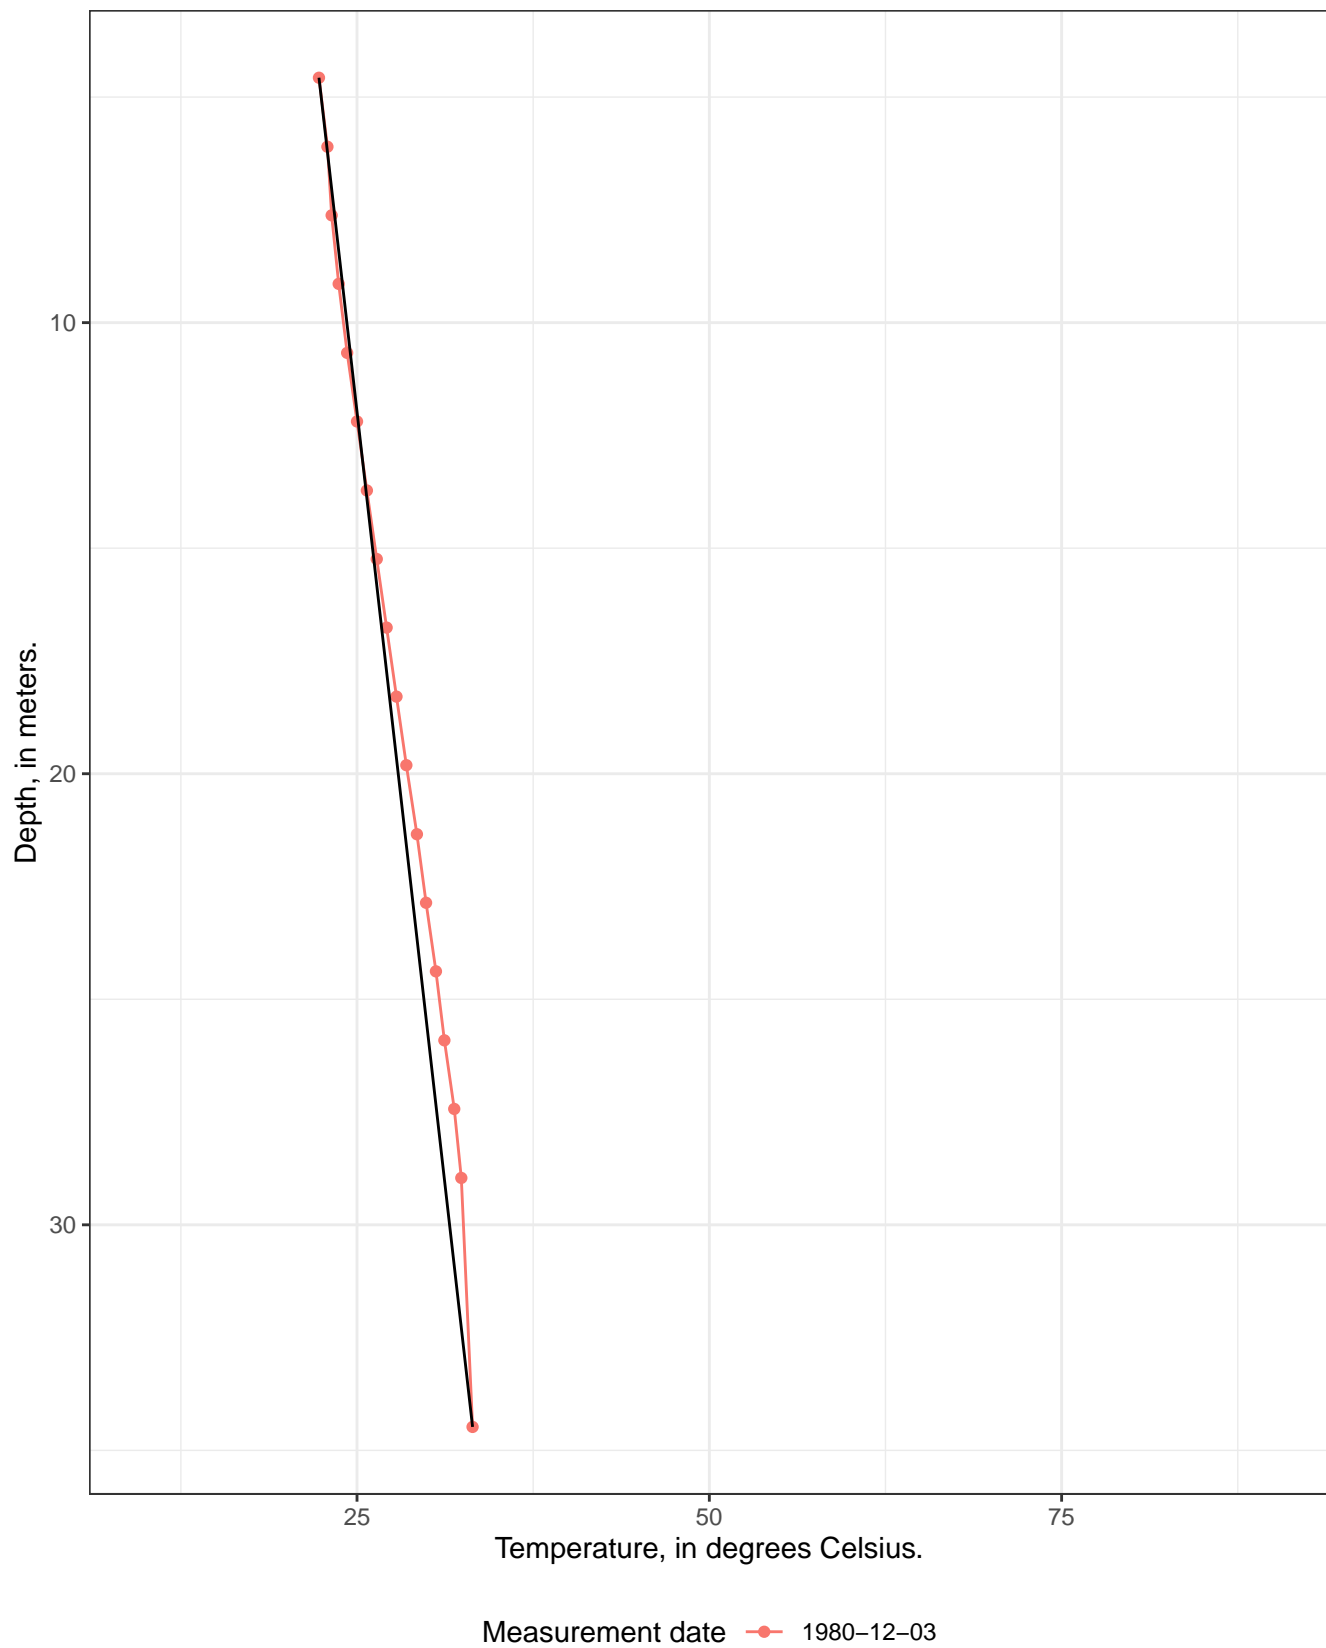

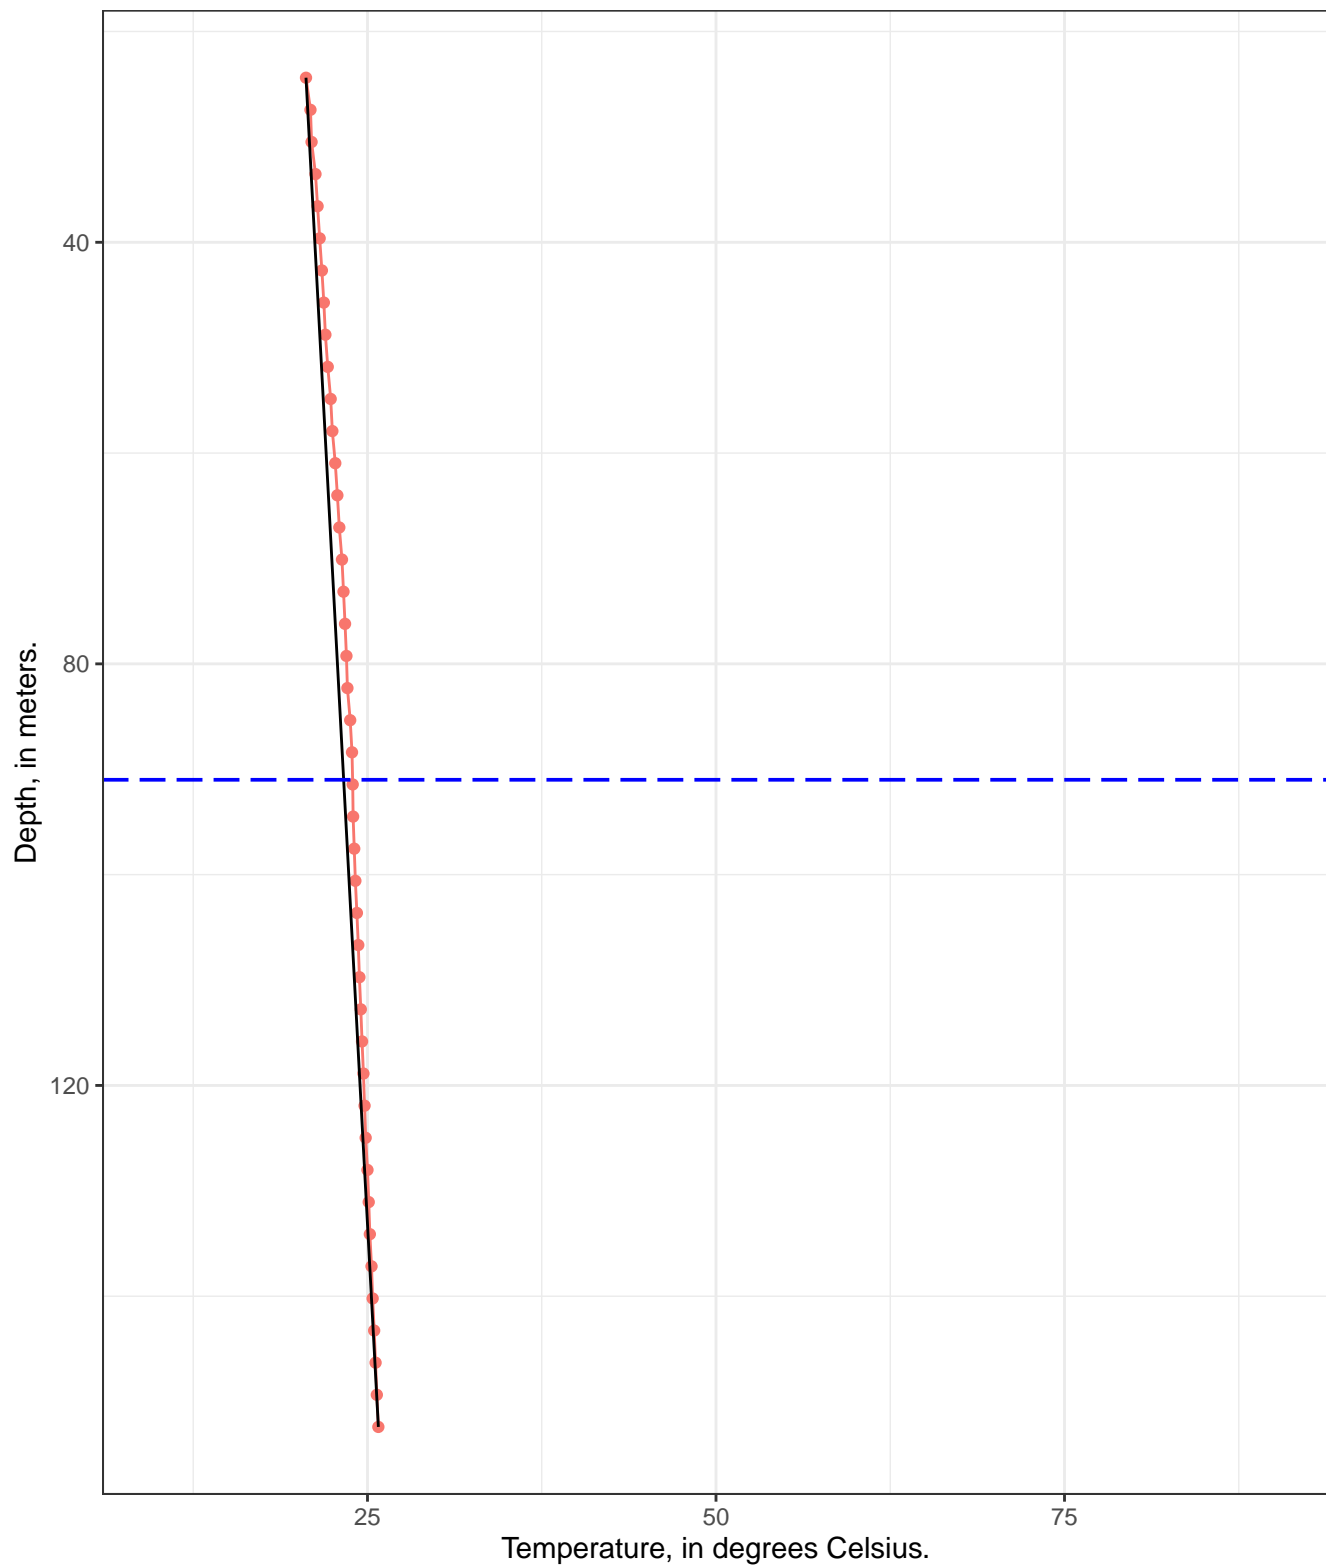

Measurement date 1980-03-03

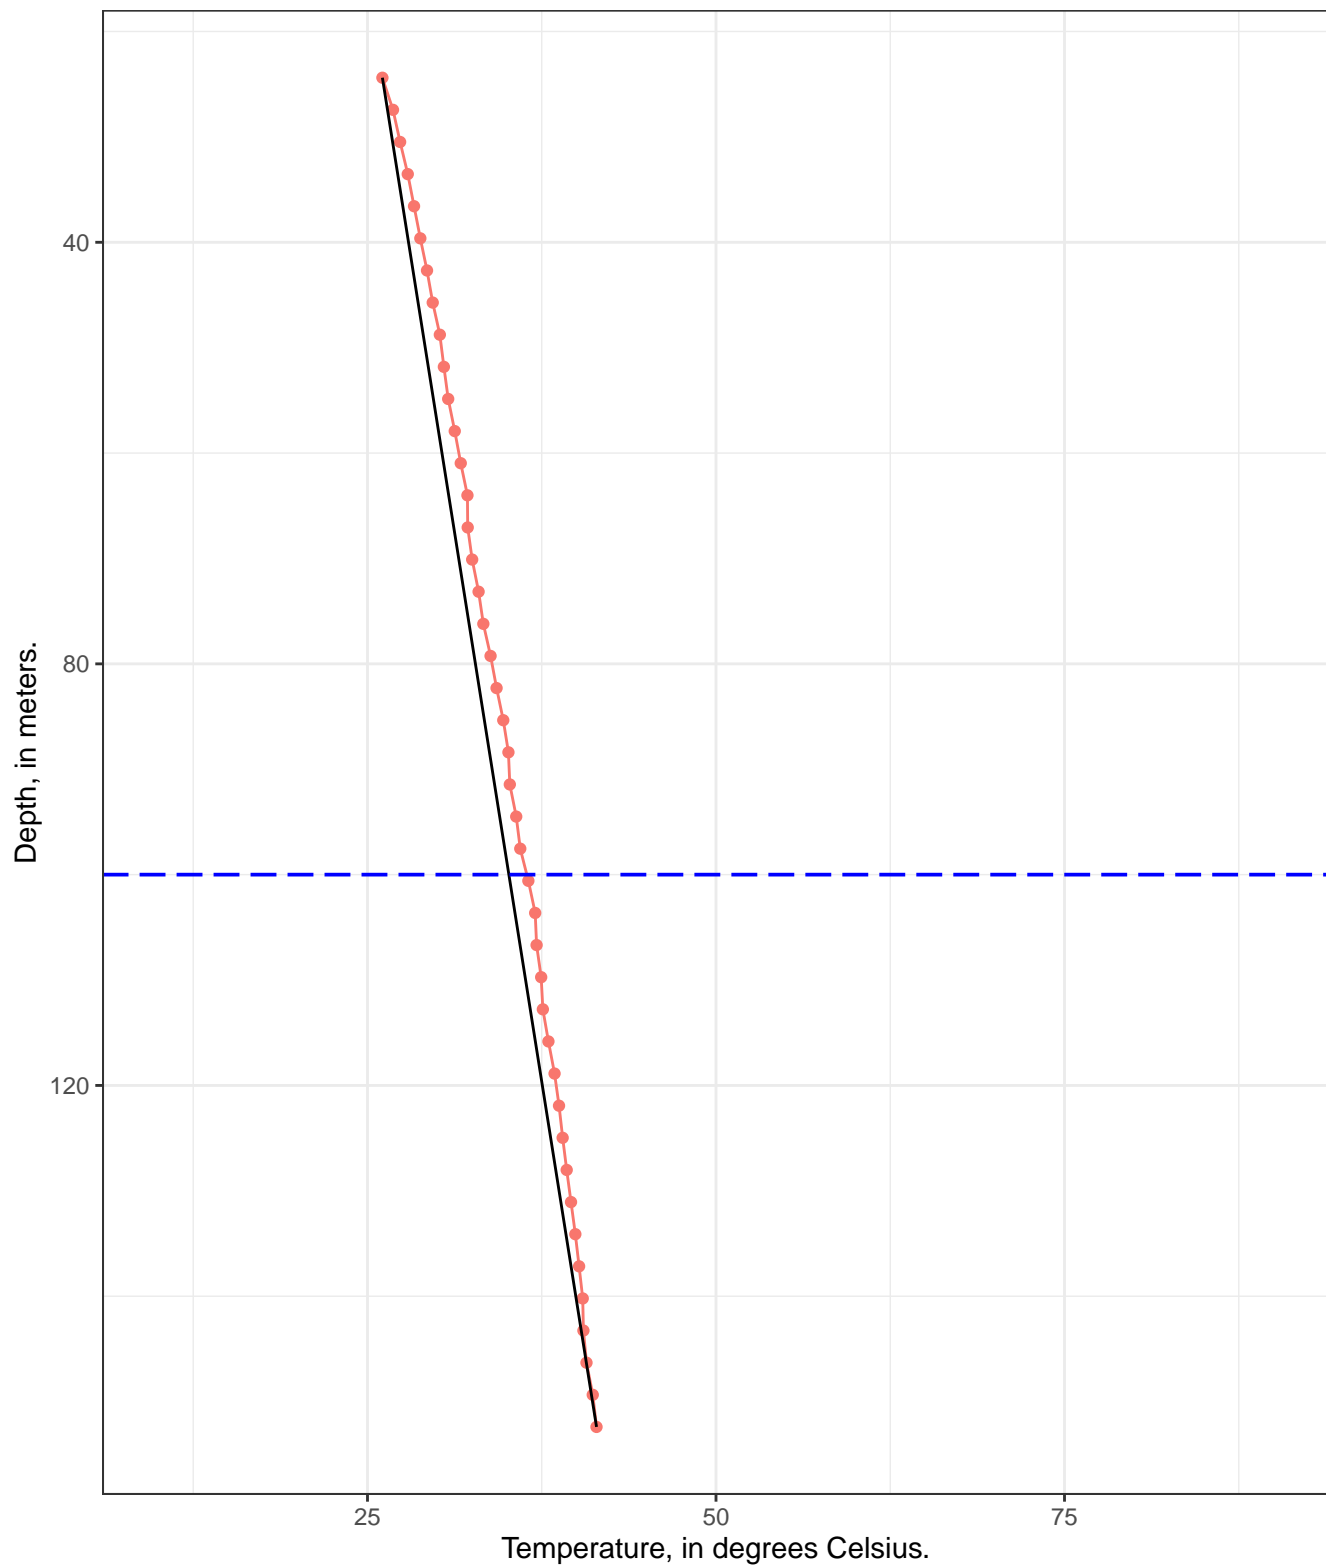



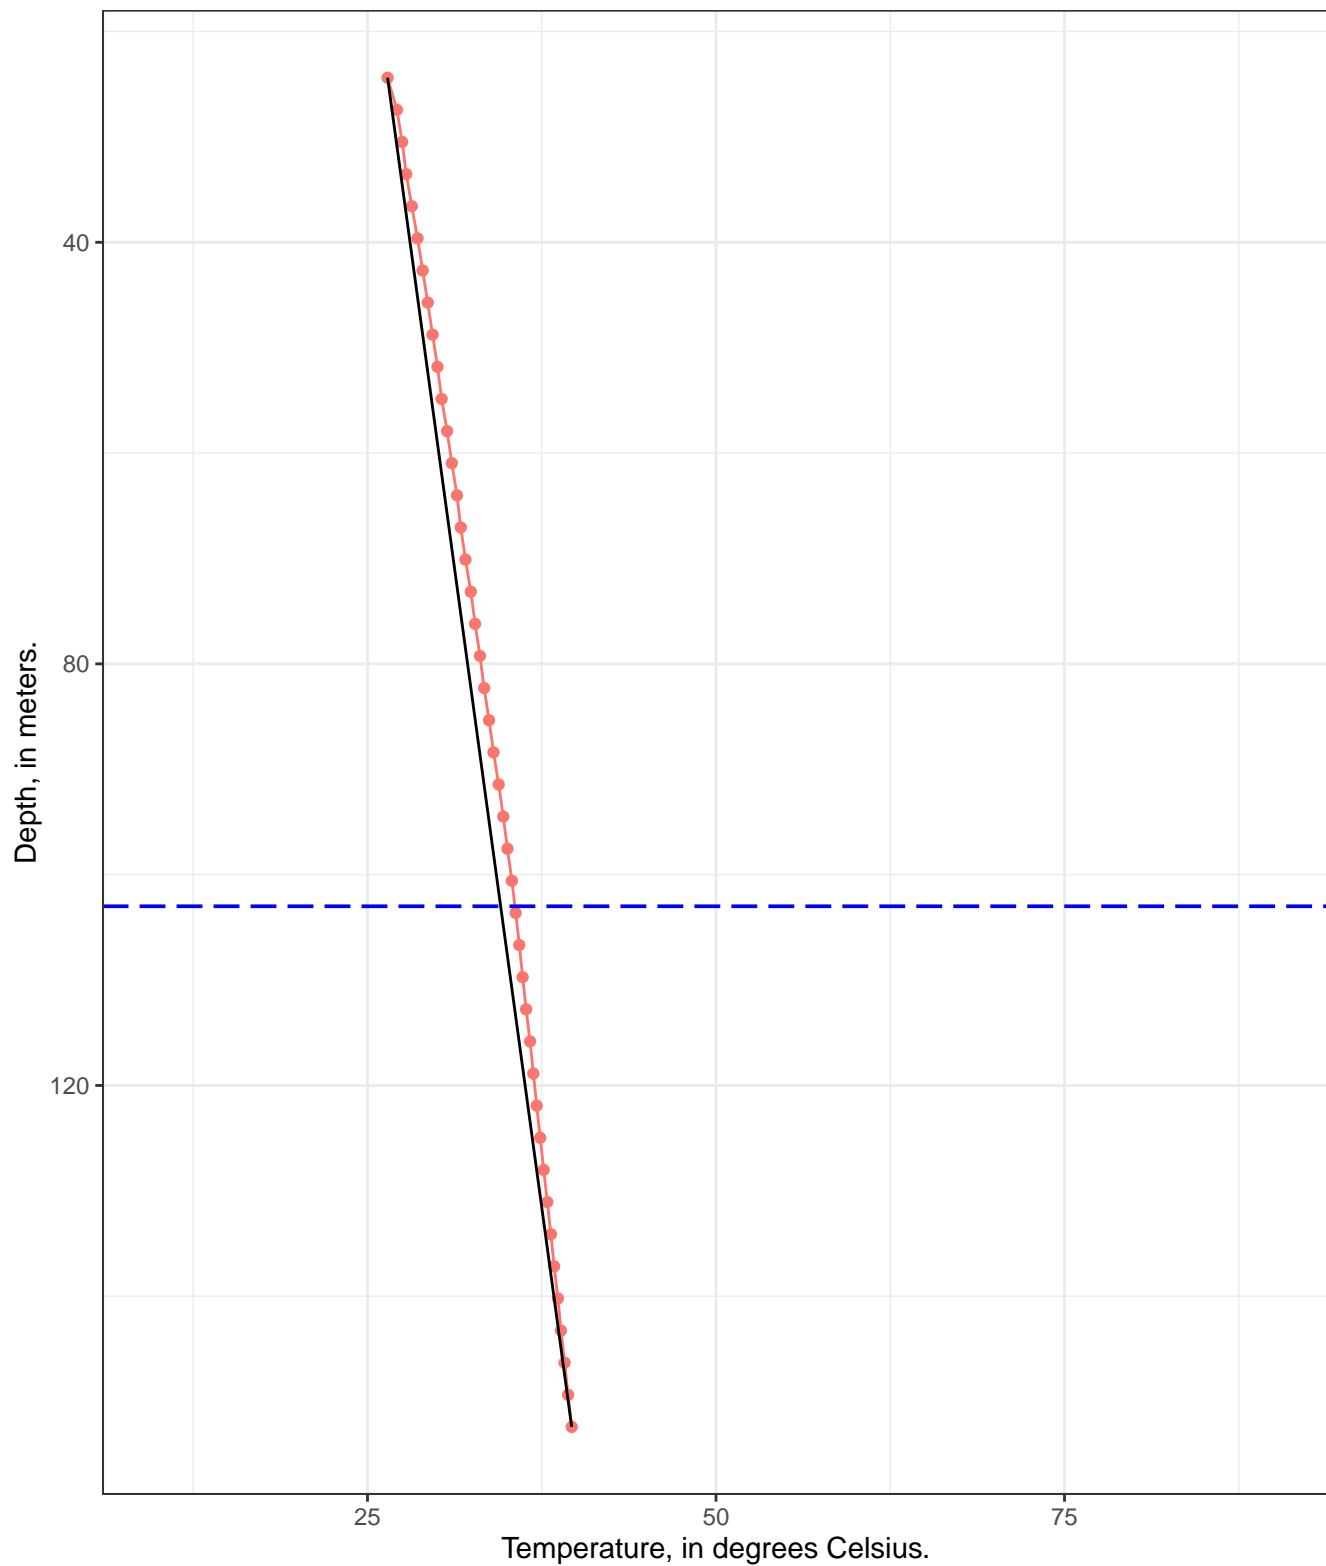

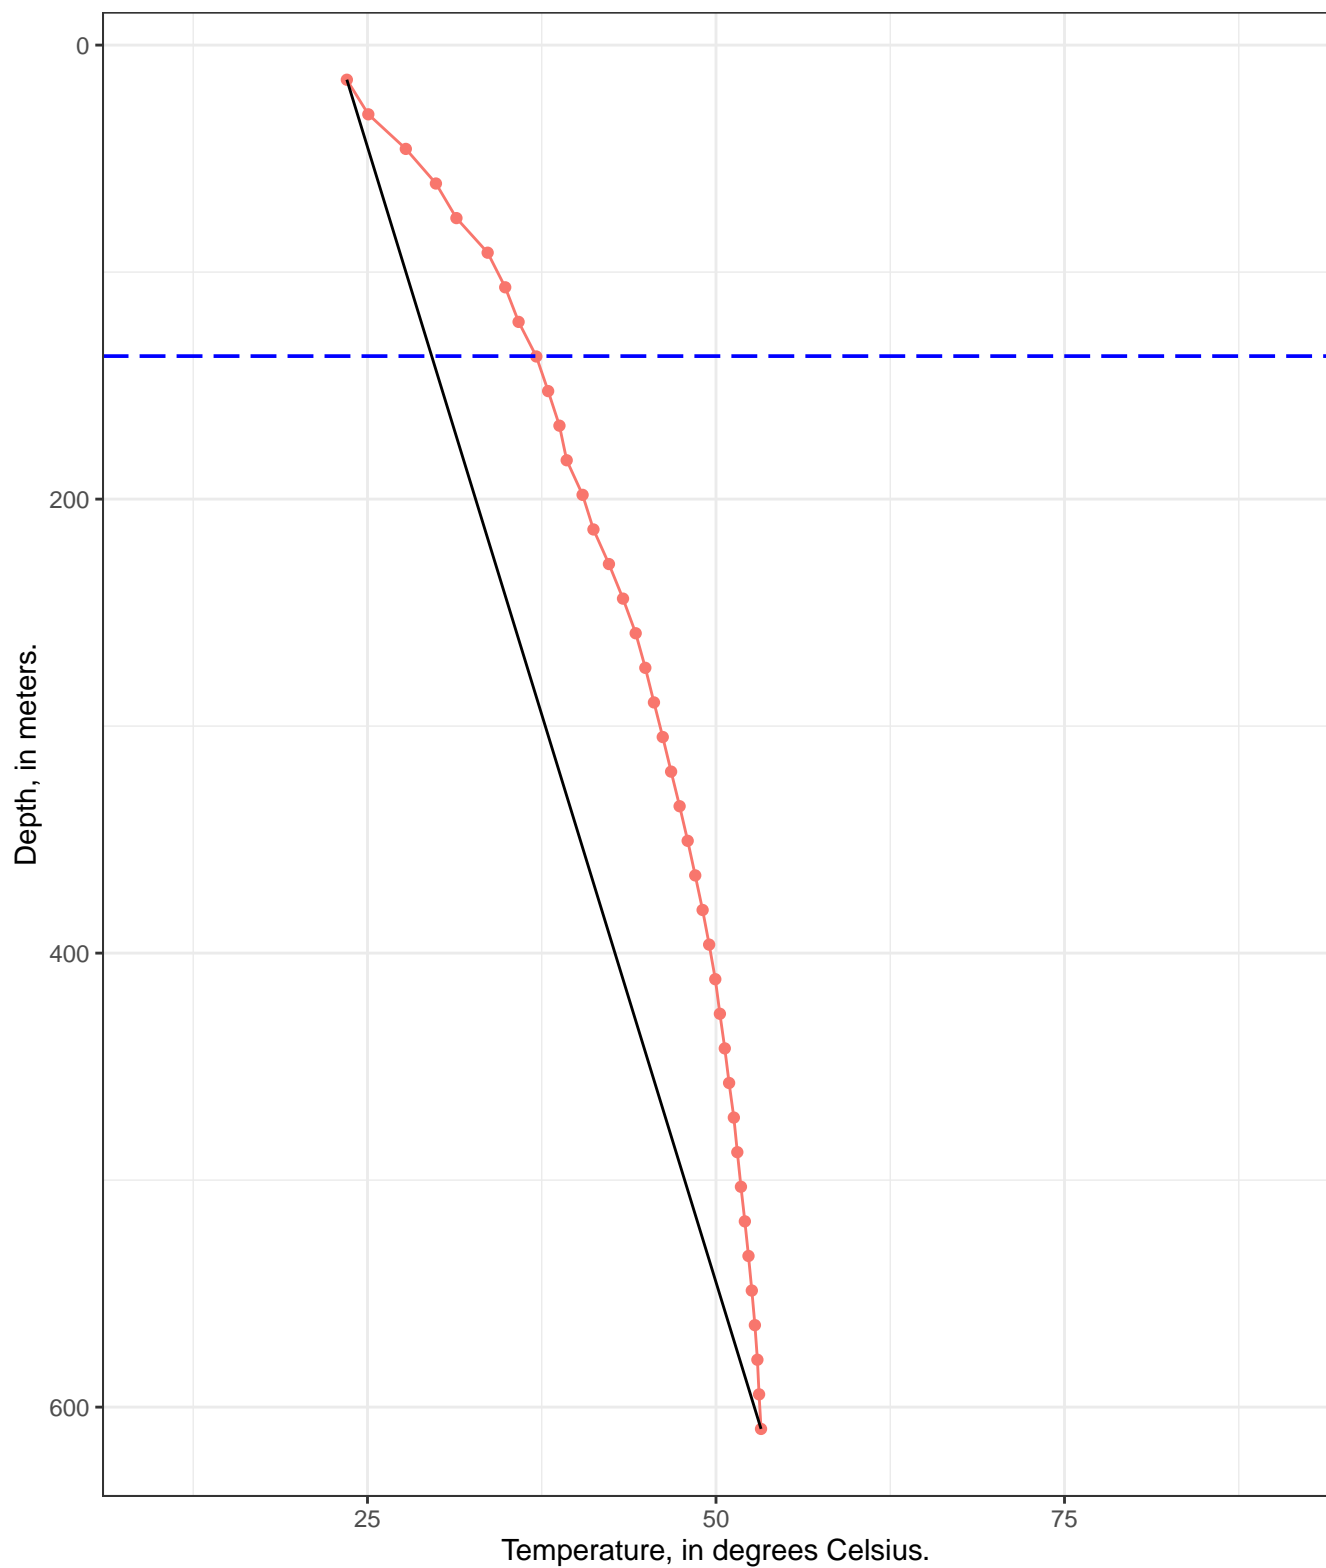

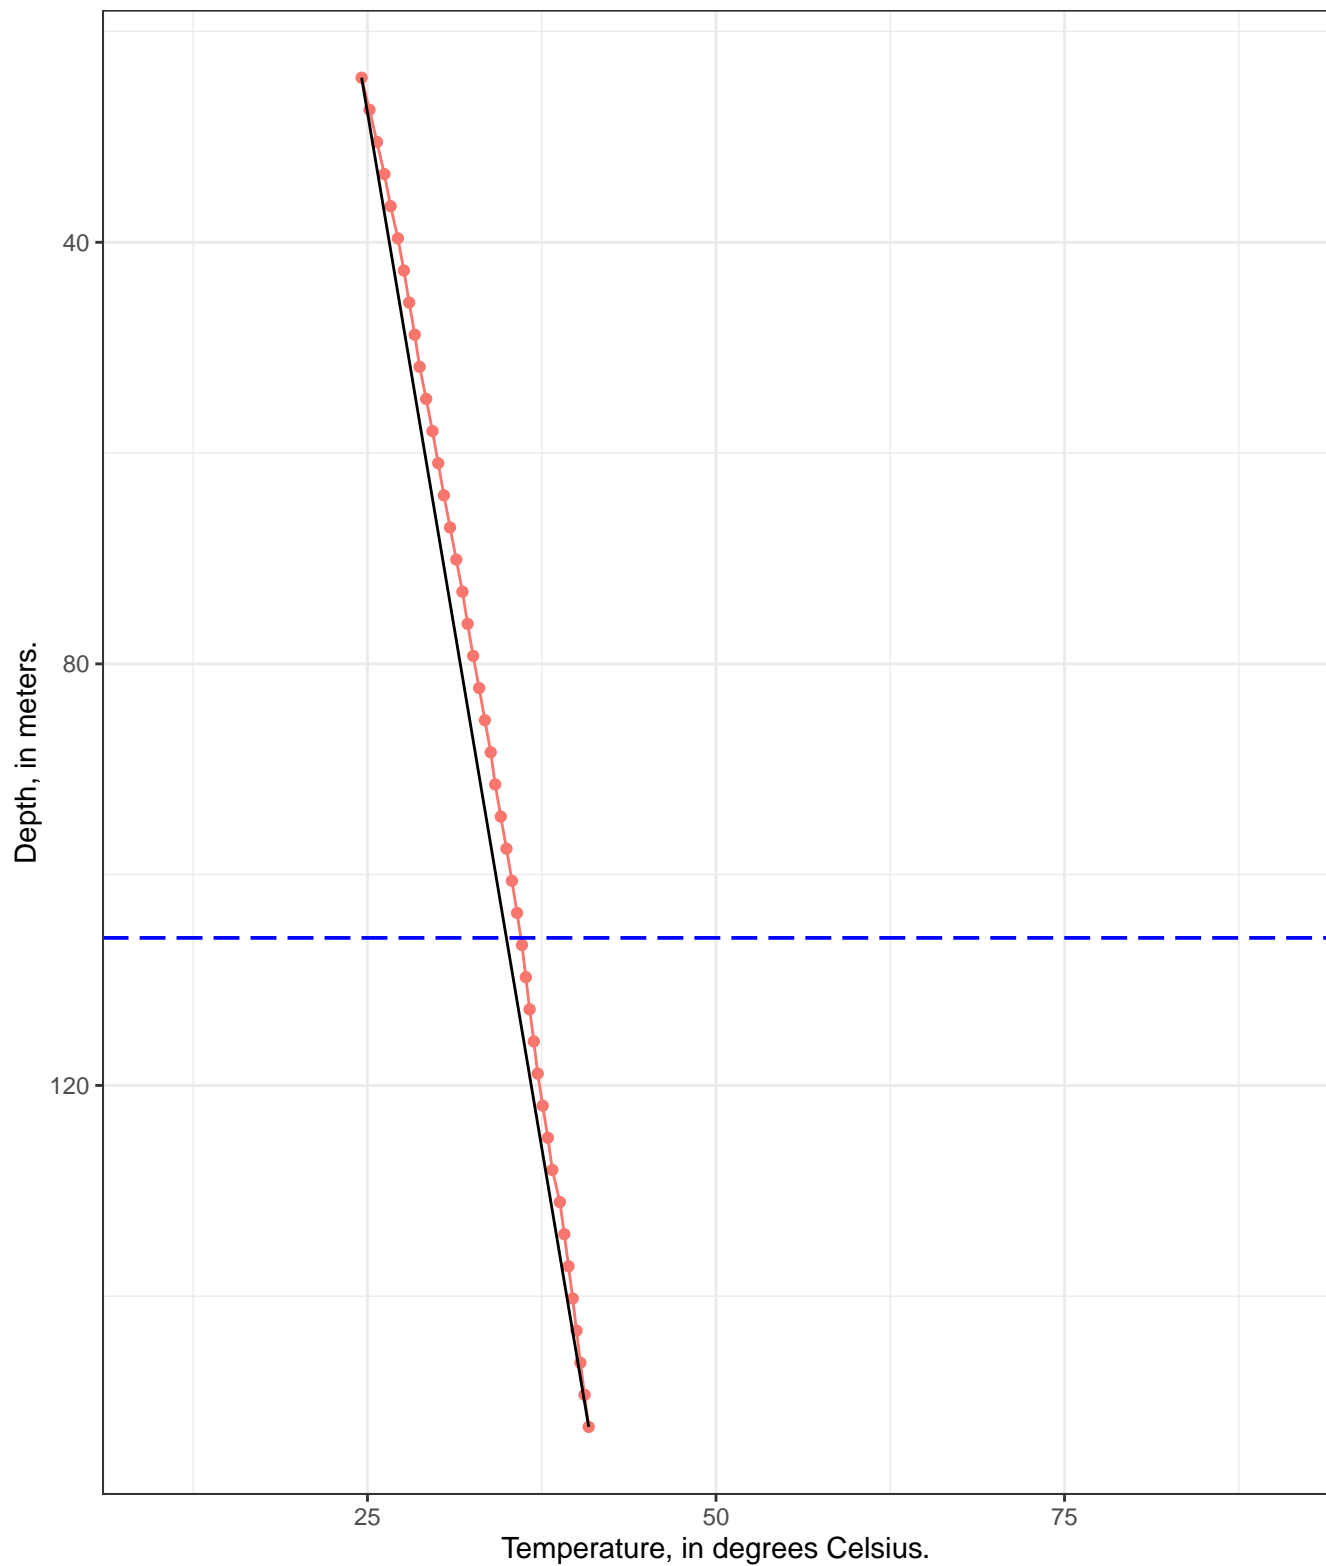

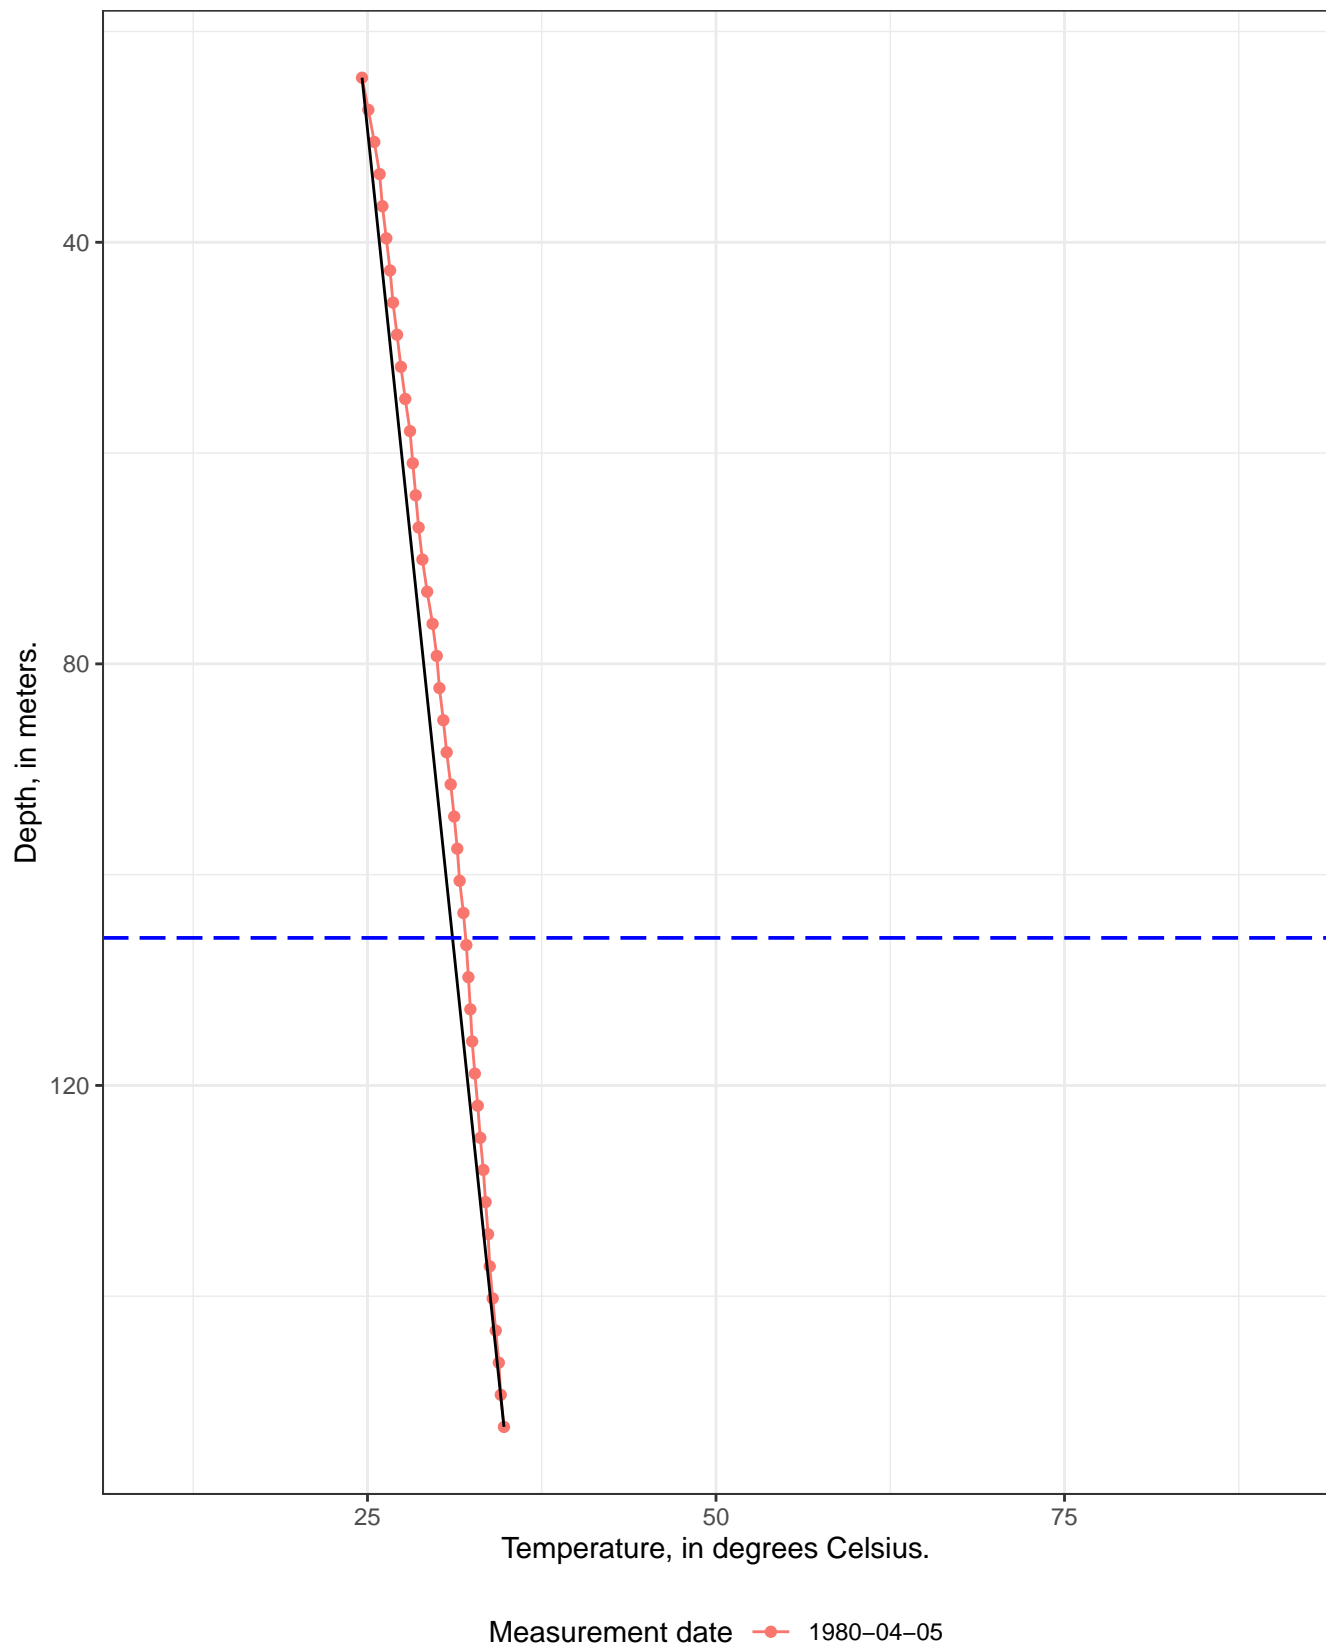

ID: 76 [H-2-80-1454\_KILBOURNE\_HOLE]

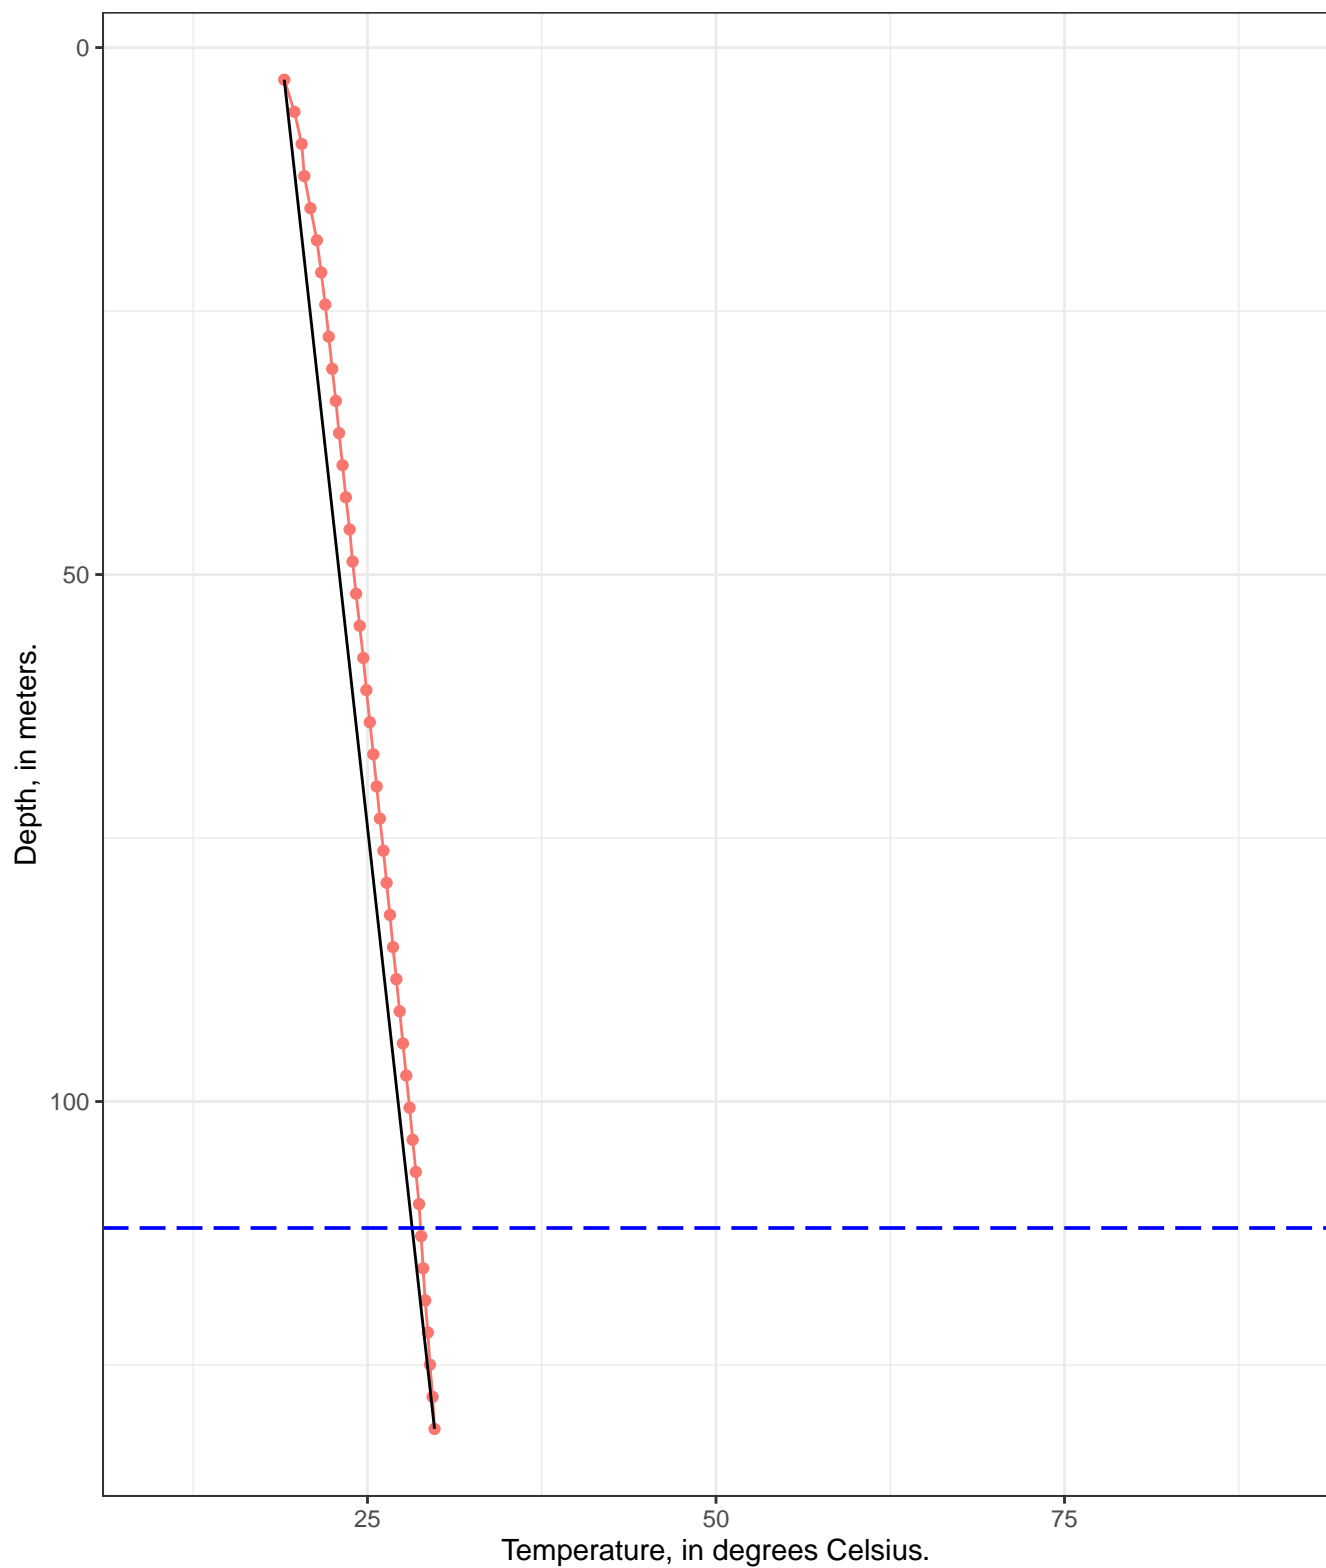

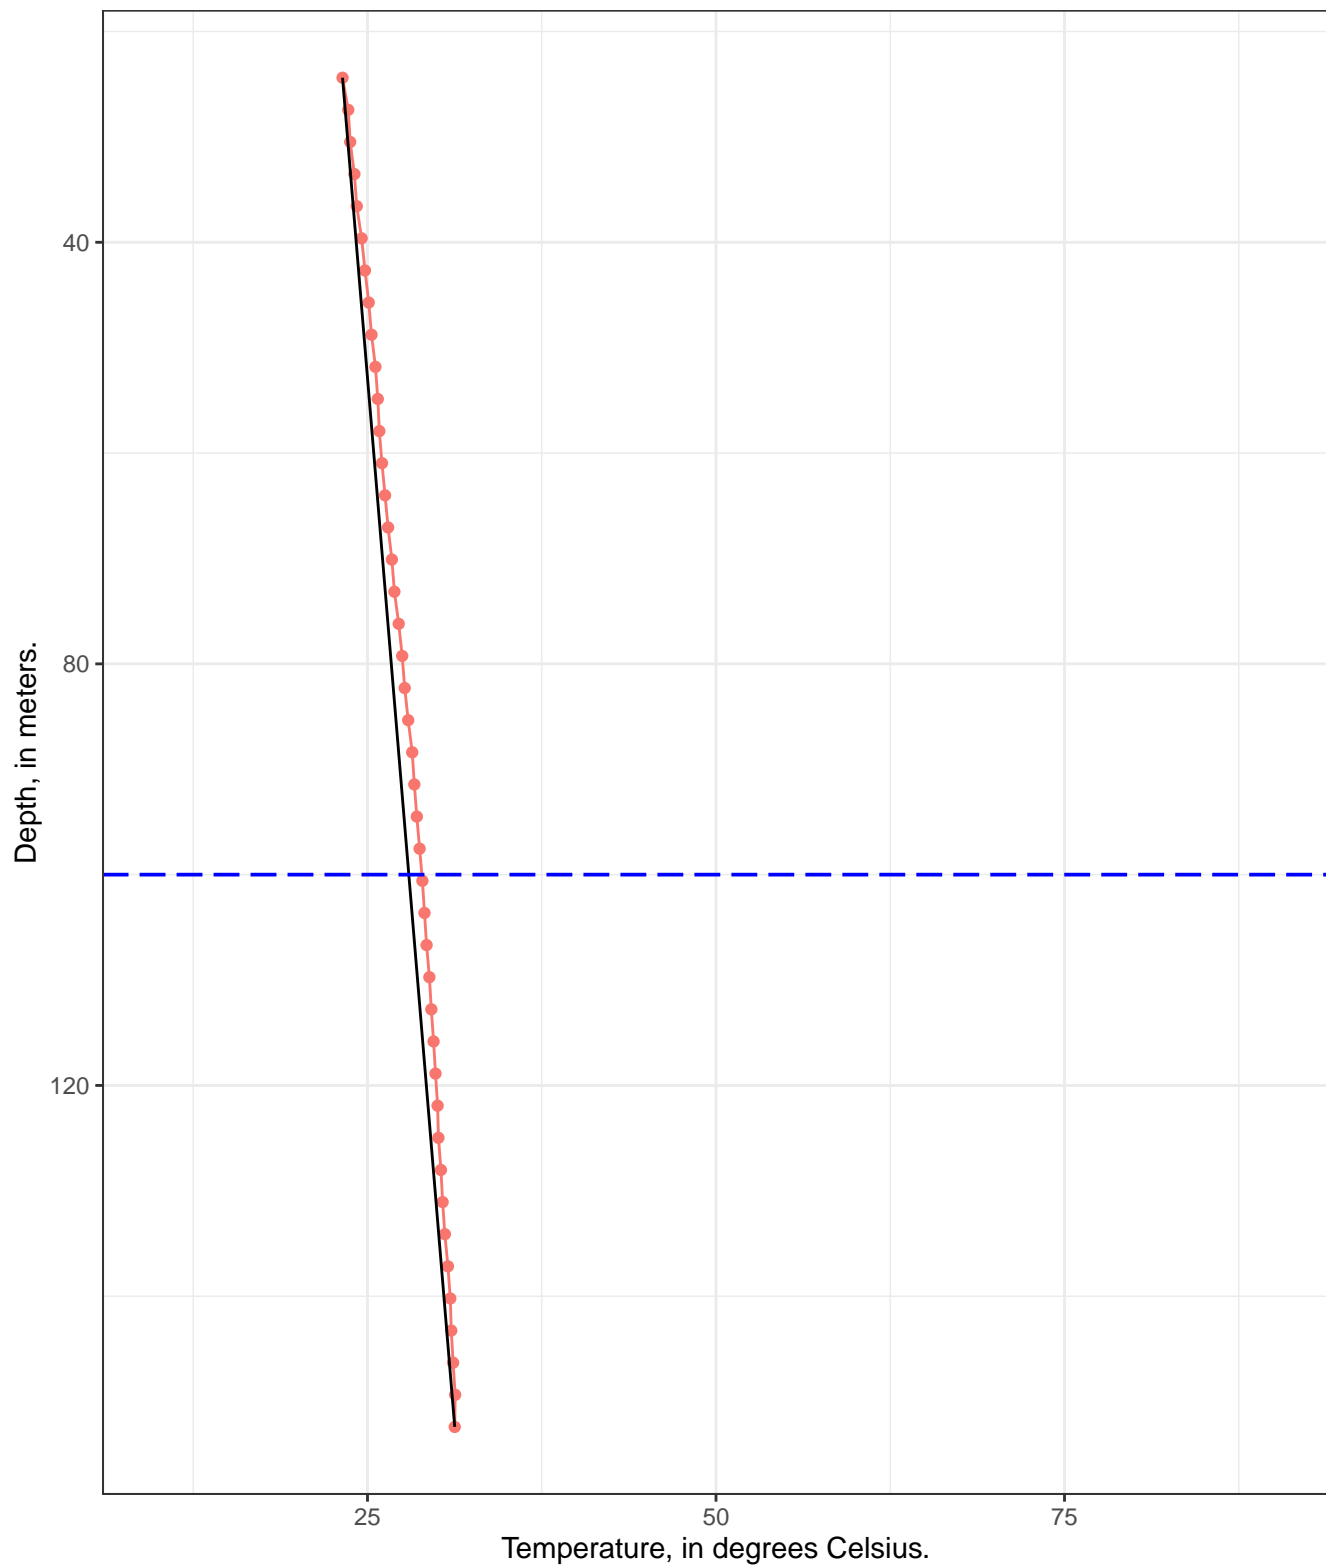

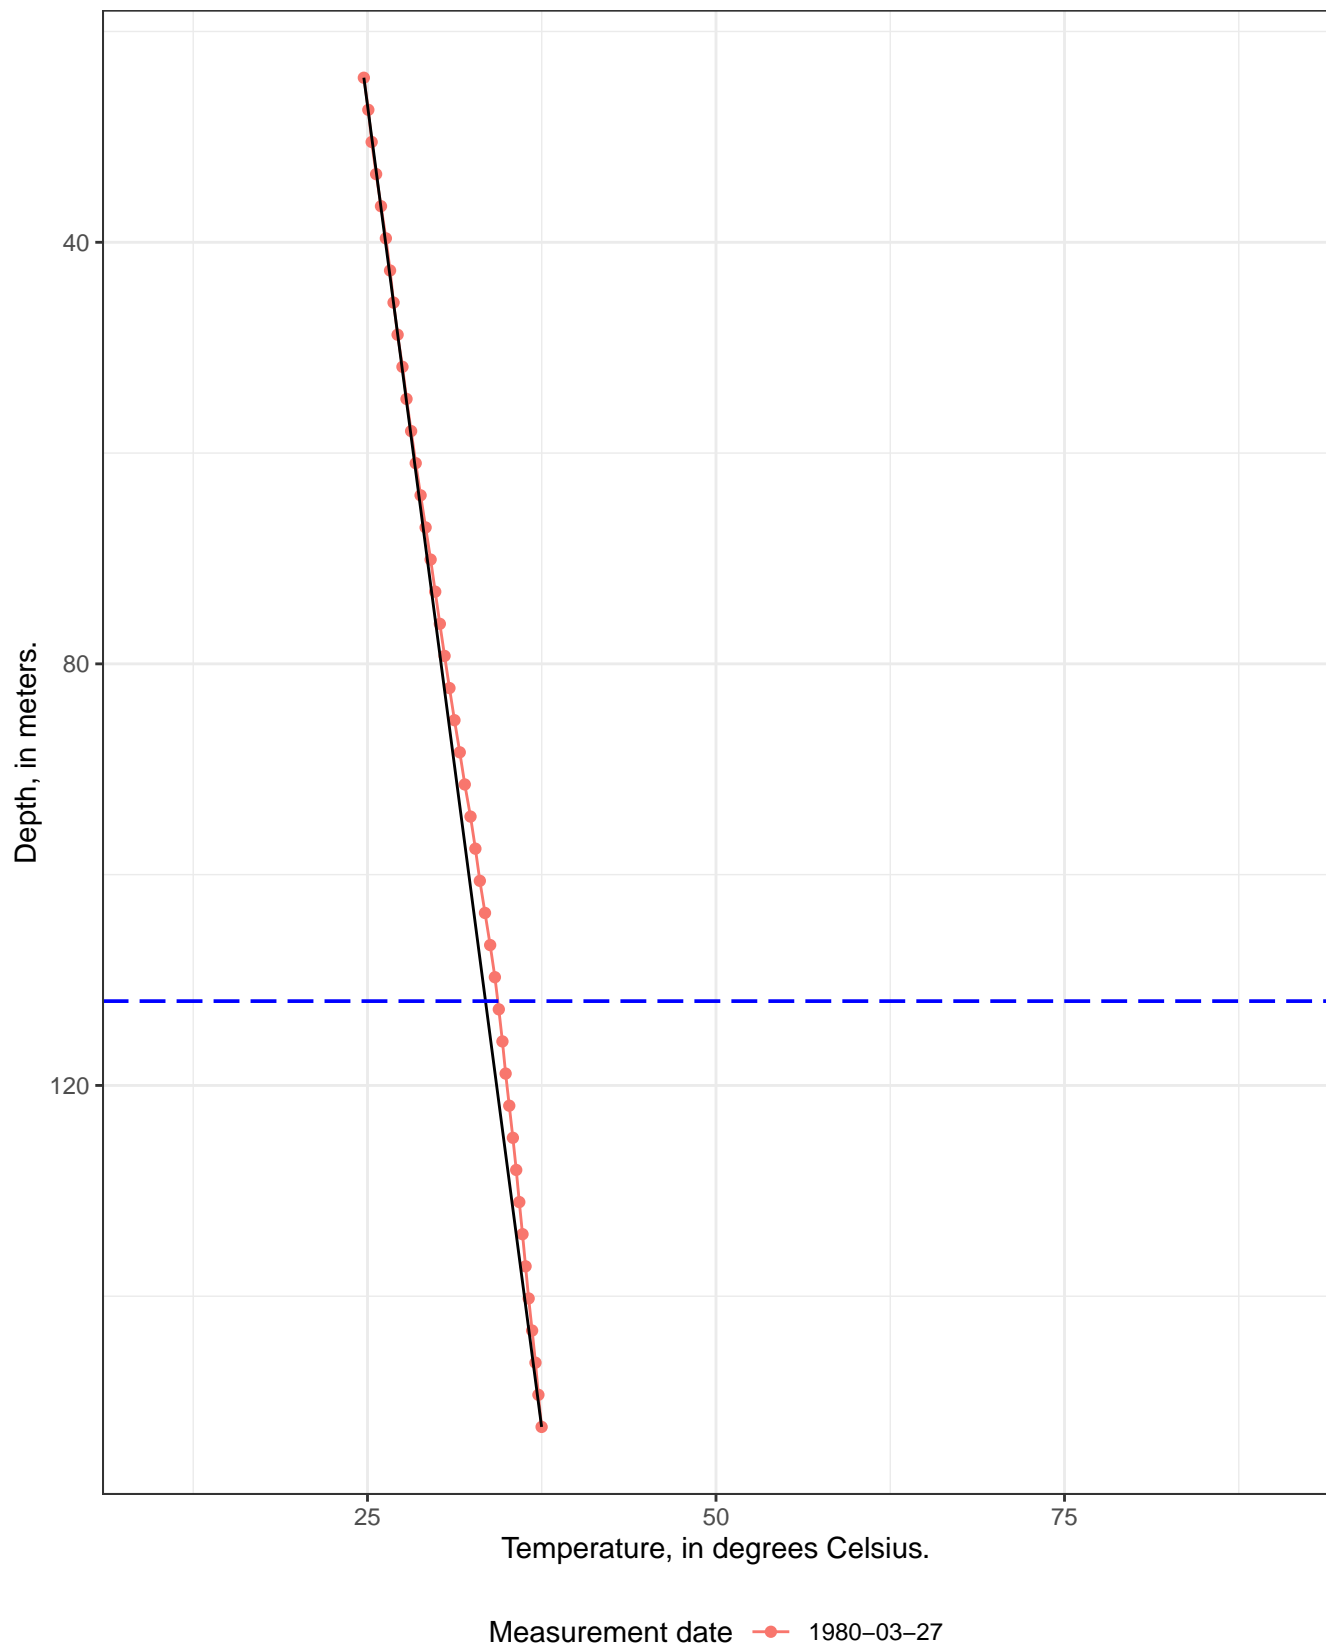

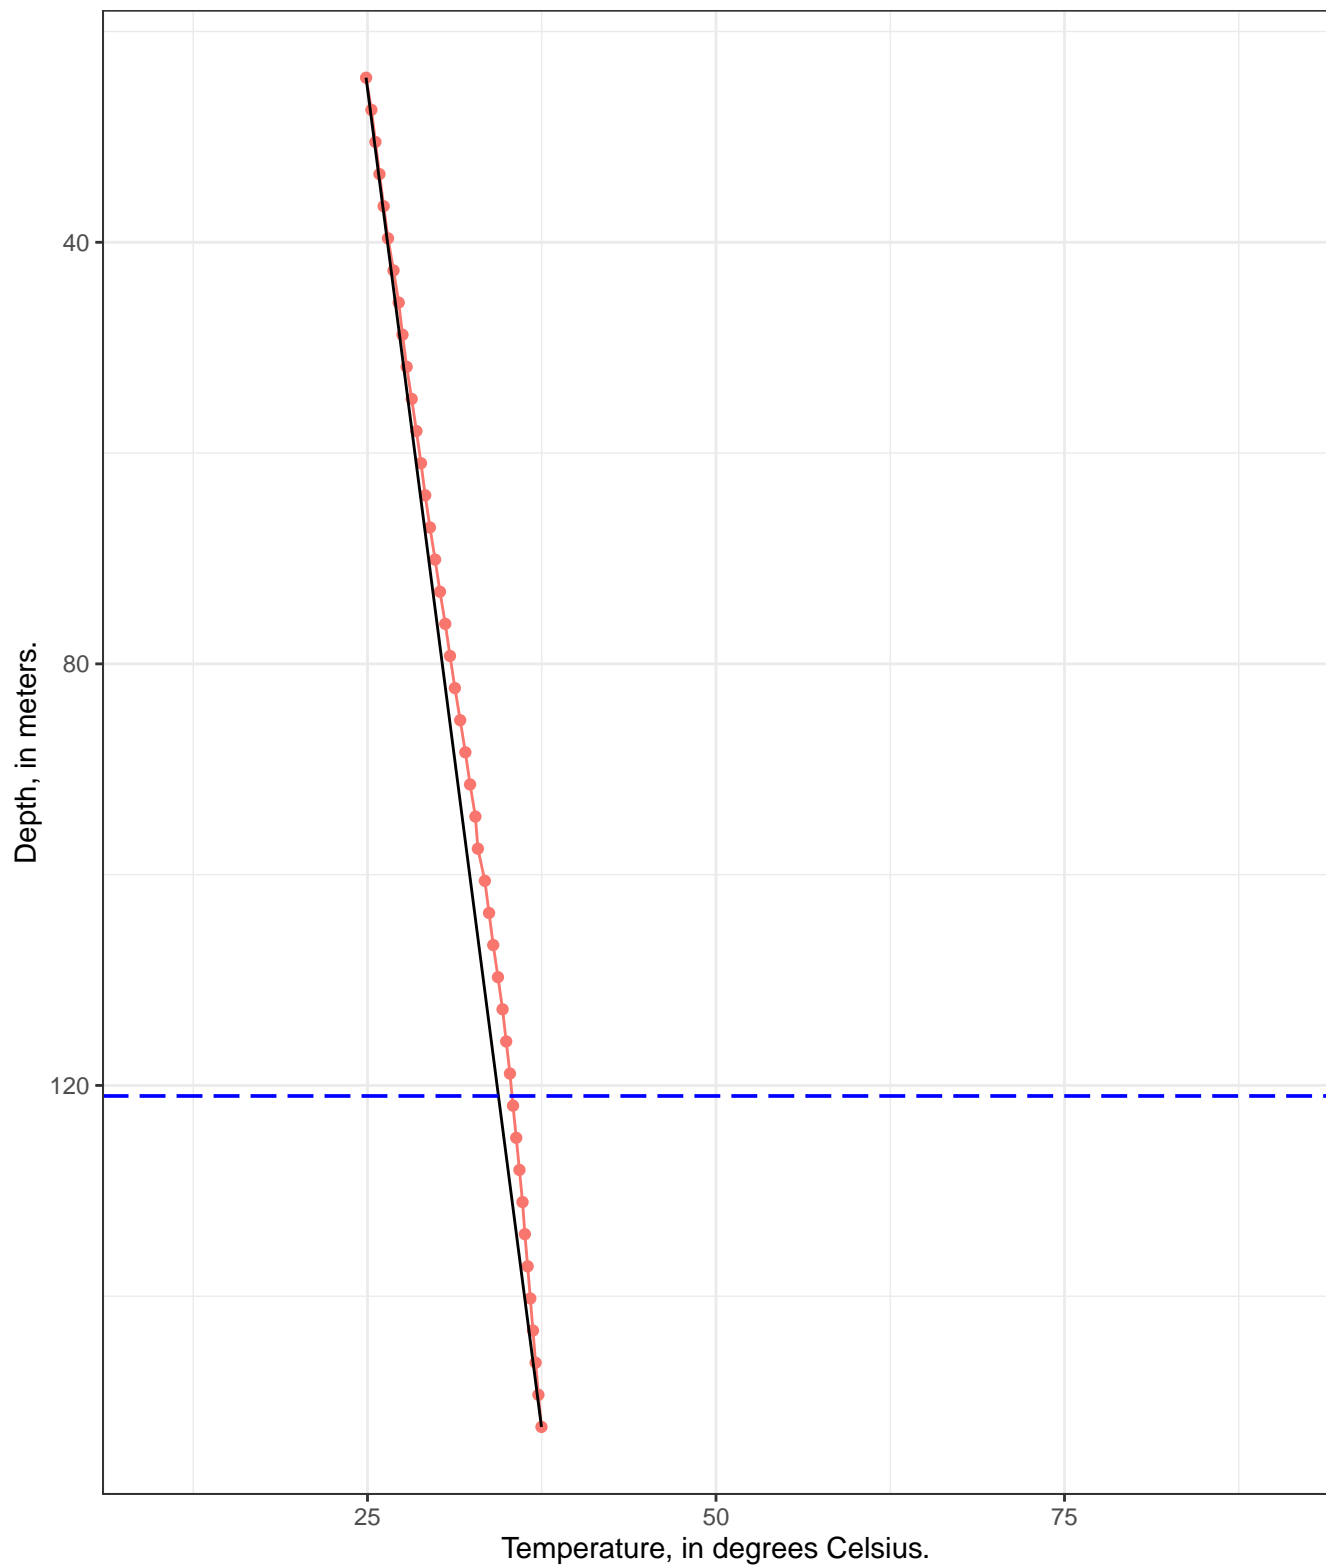

Measurement date 1980-04-03



ID: 80 [H-2-80-1460\_KILBOURNE\_HOLE]

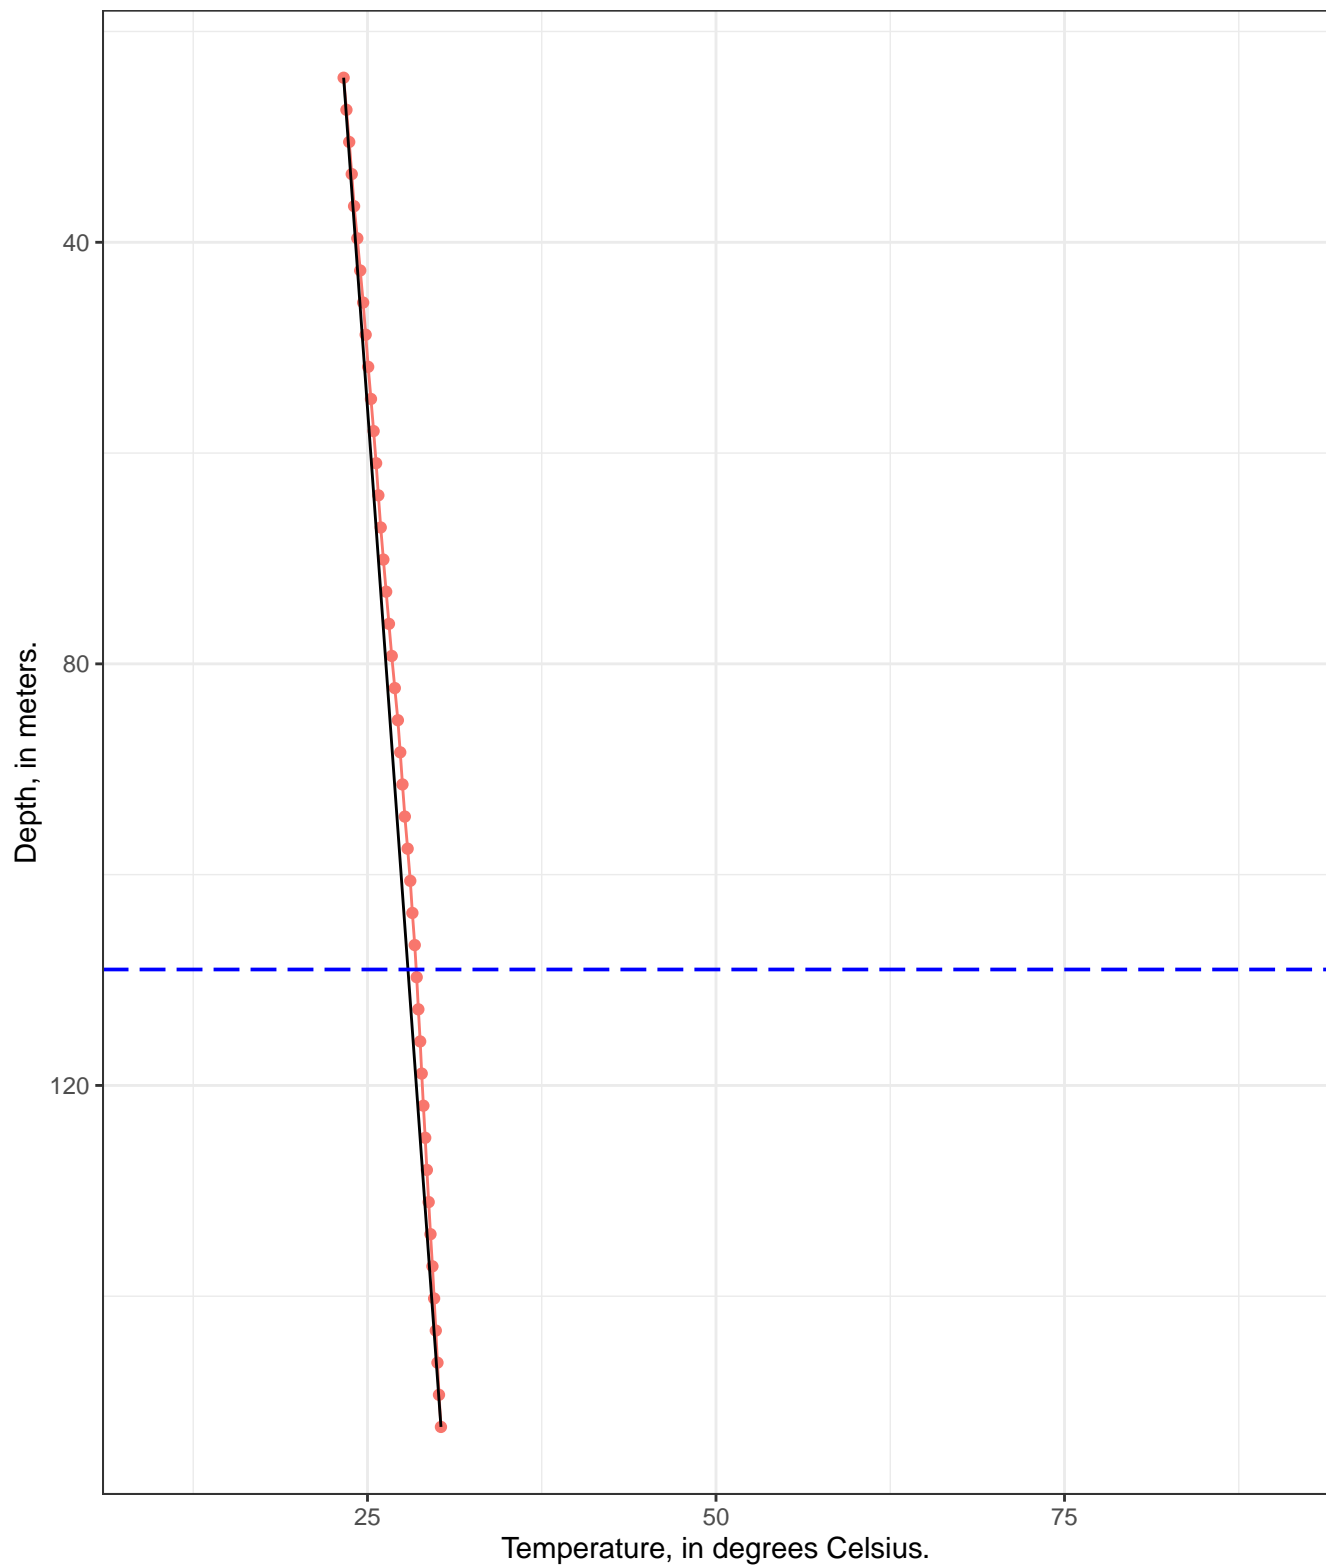

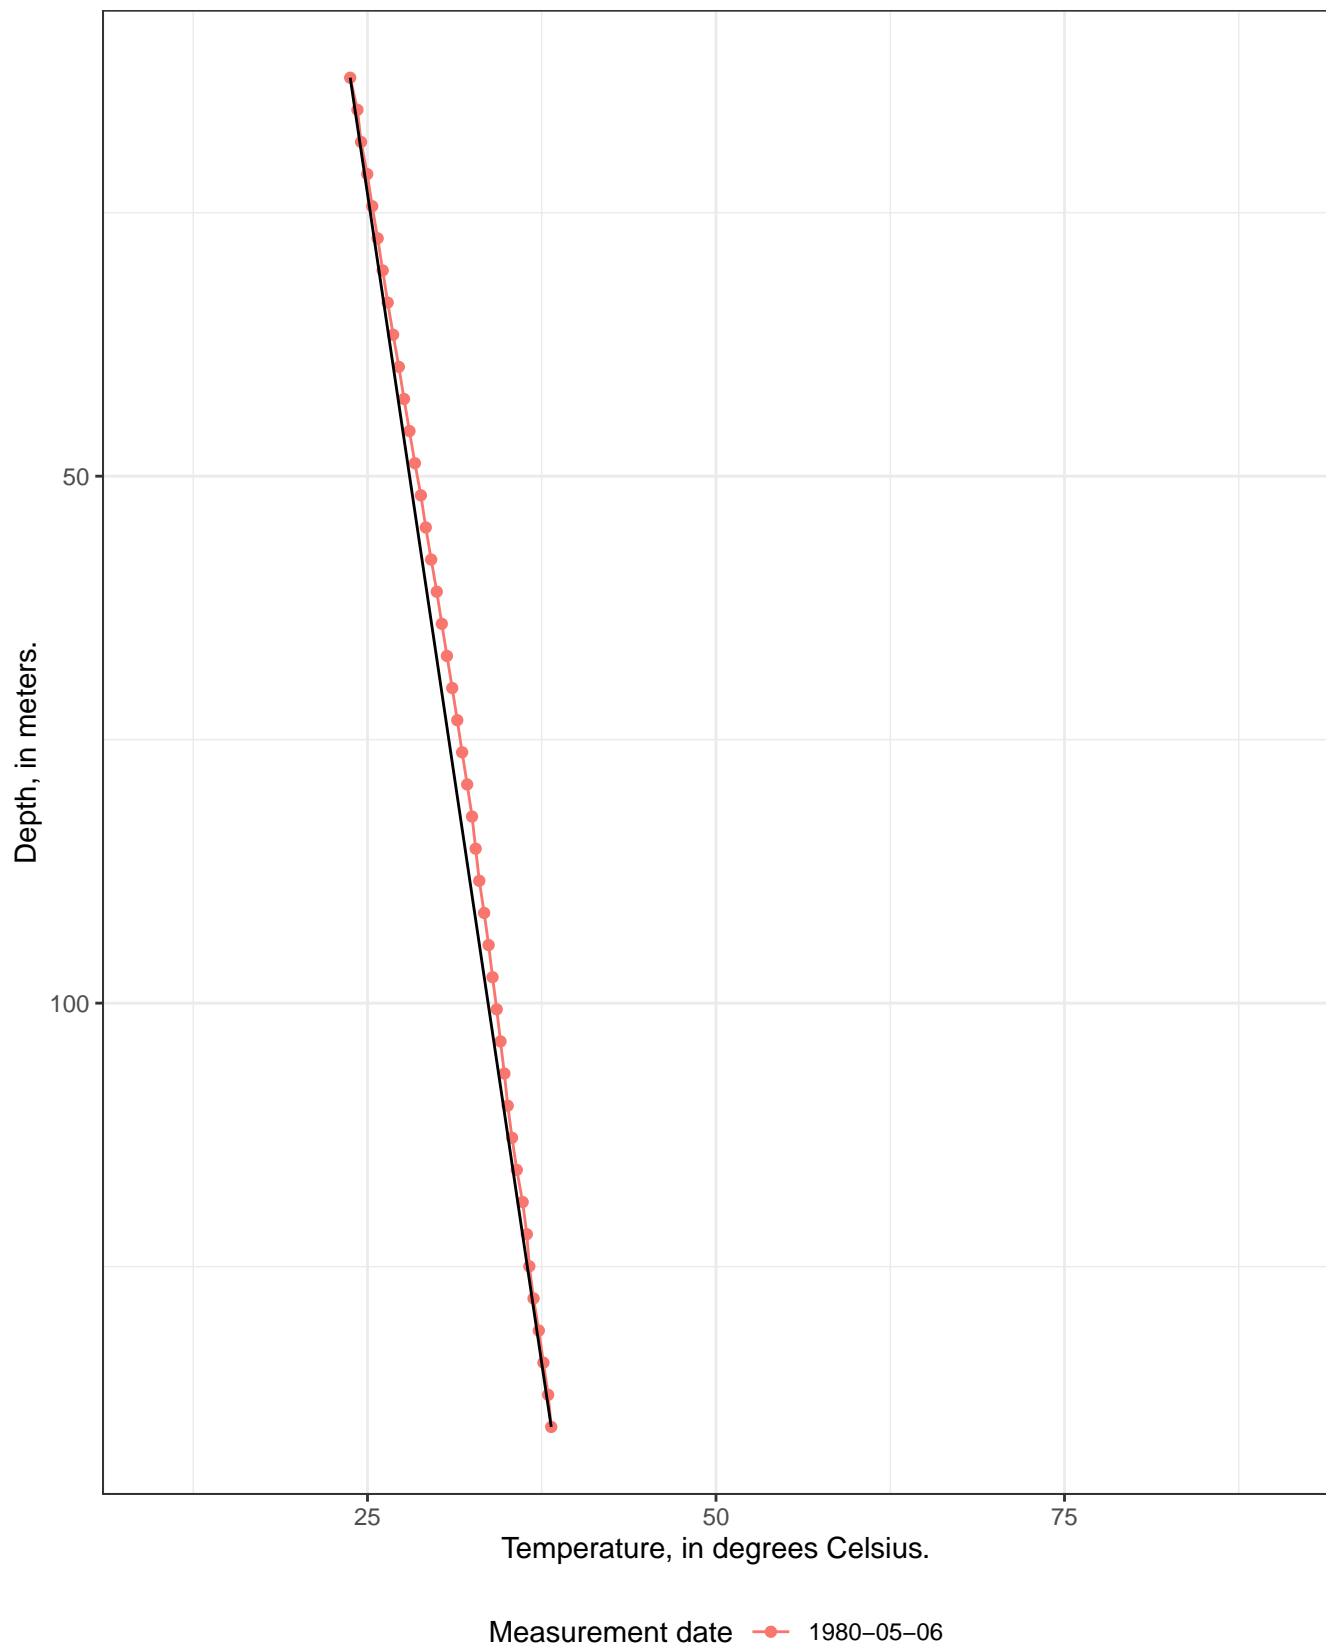

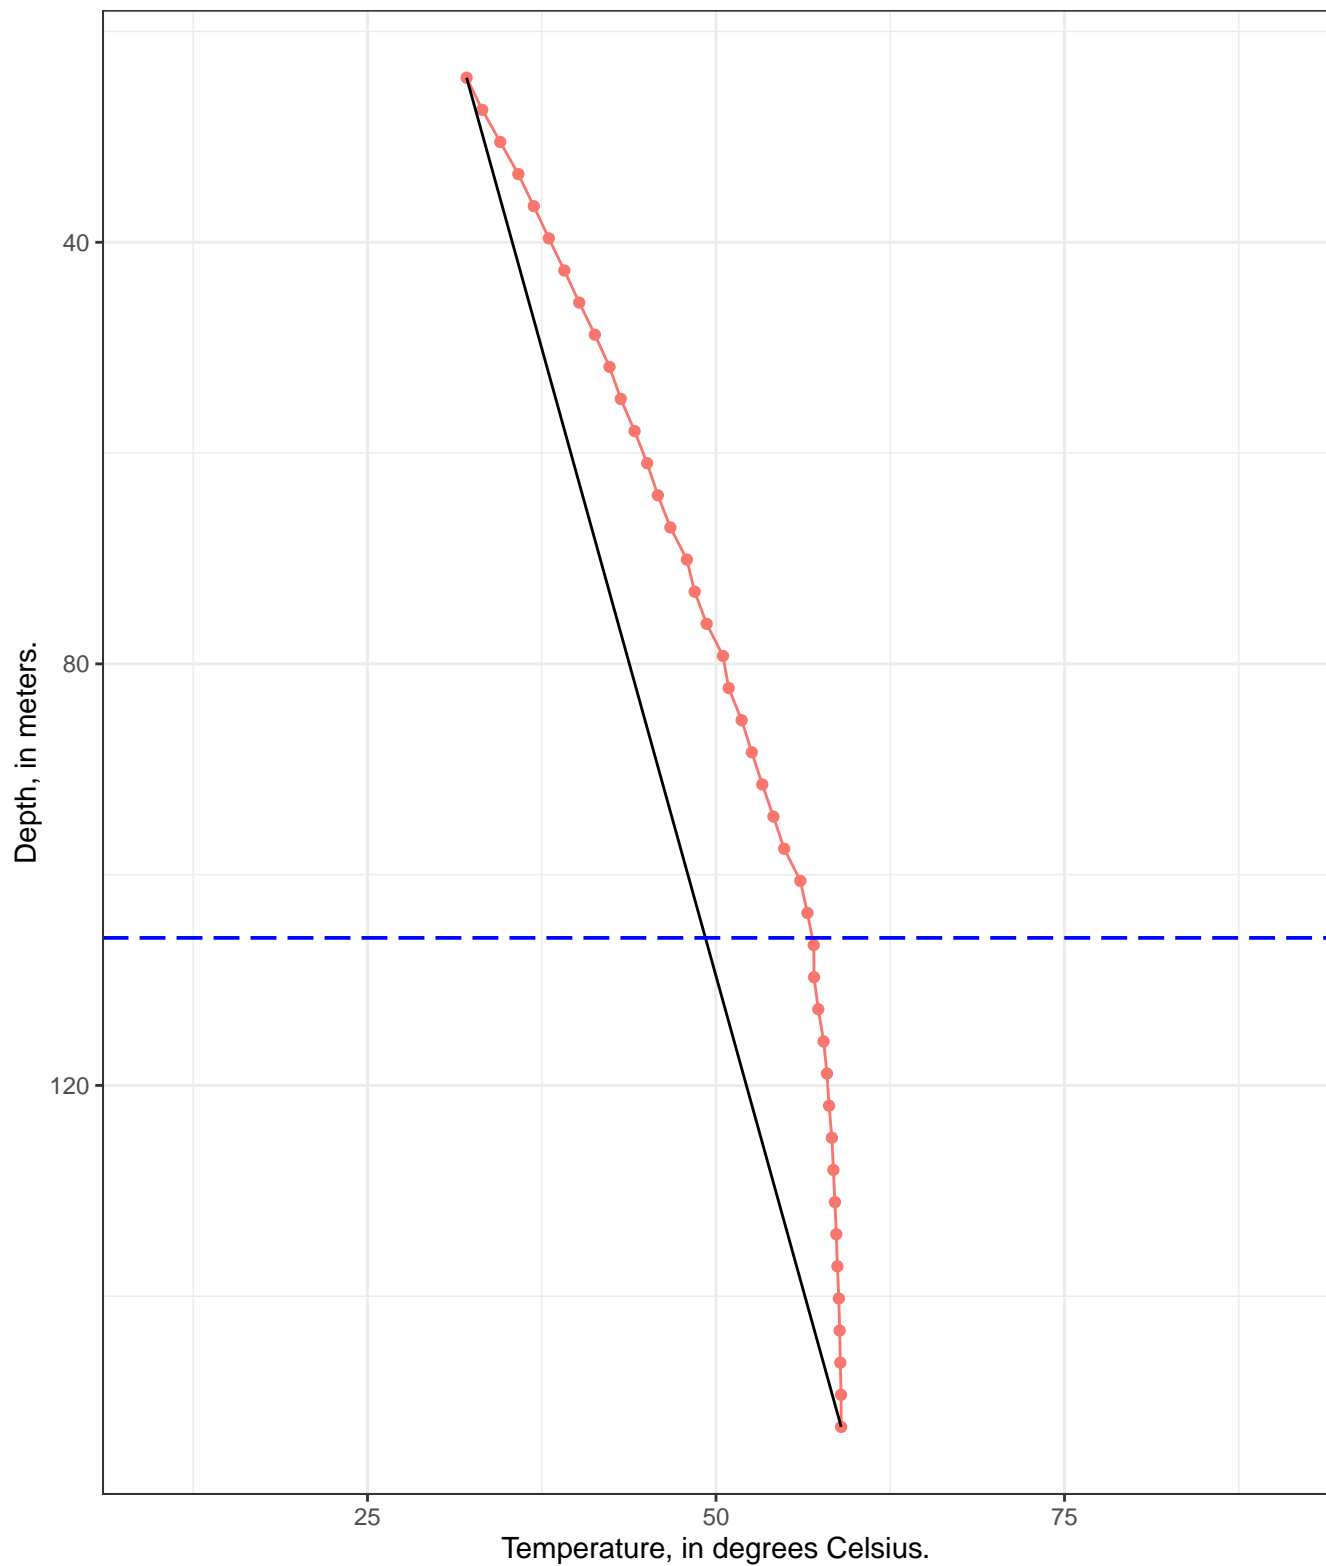

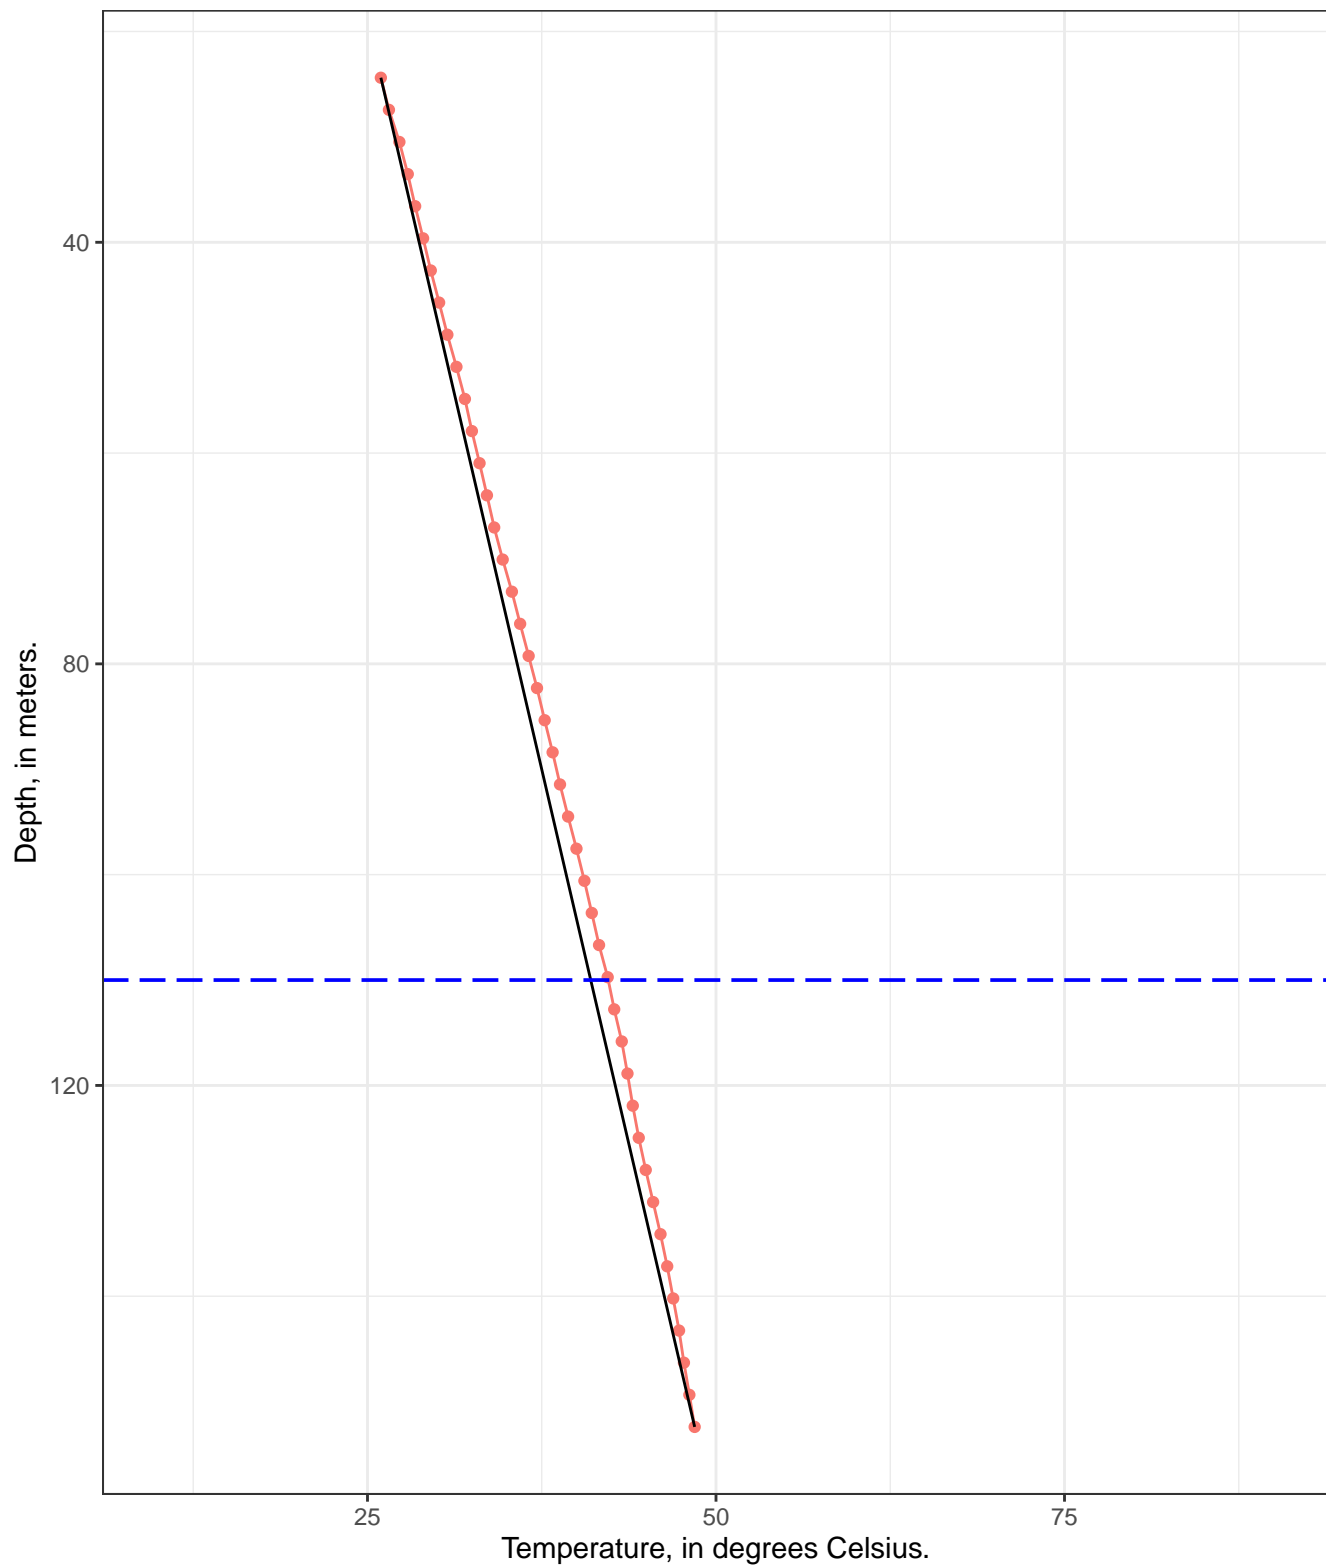

ID: 84 [H-2-80-1464B\_KILBOURNE\_HOLE]

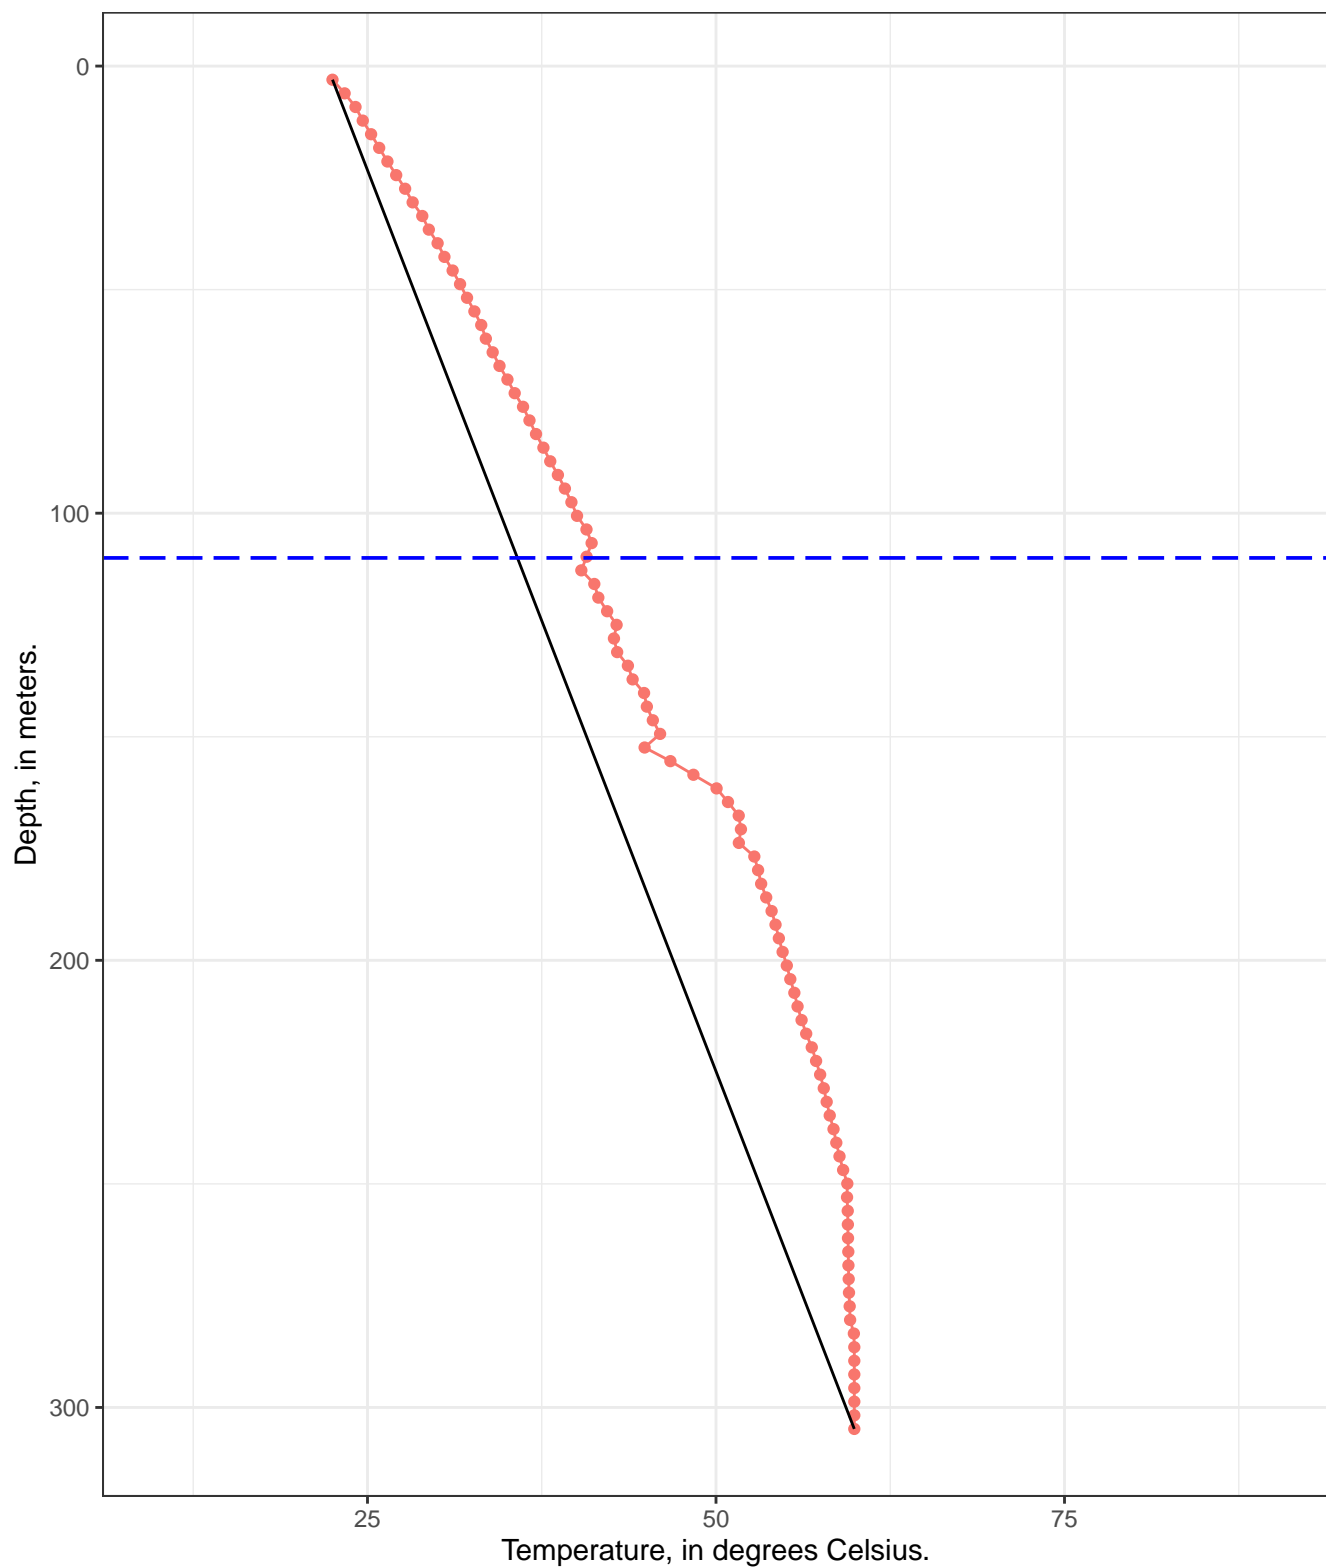

Measurement date 1980-05-11

ID: 85 [H-2-80-1465\_KILBOURNE\_HOLE]

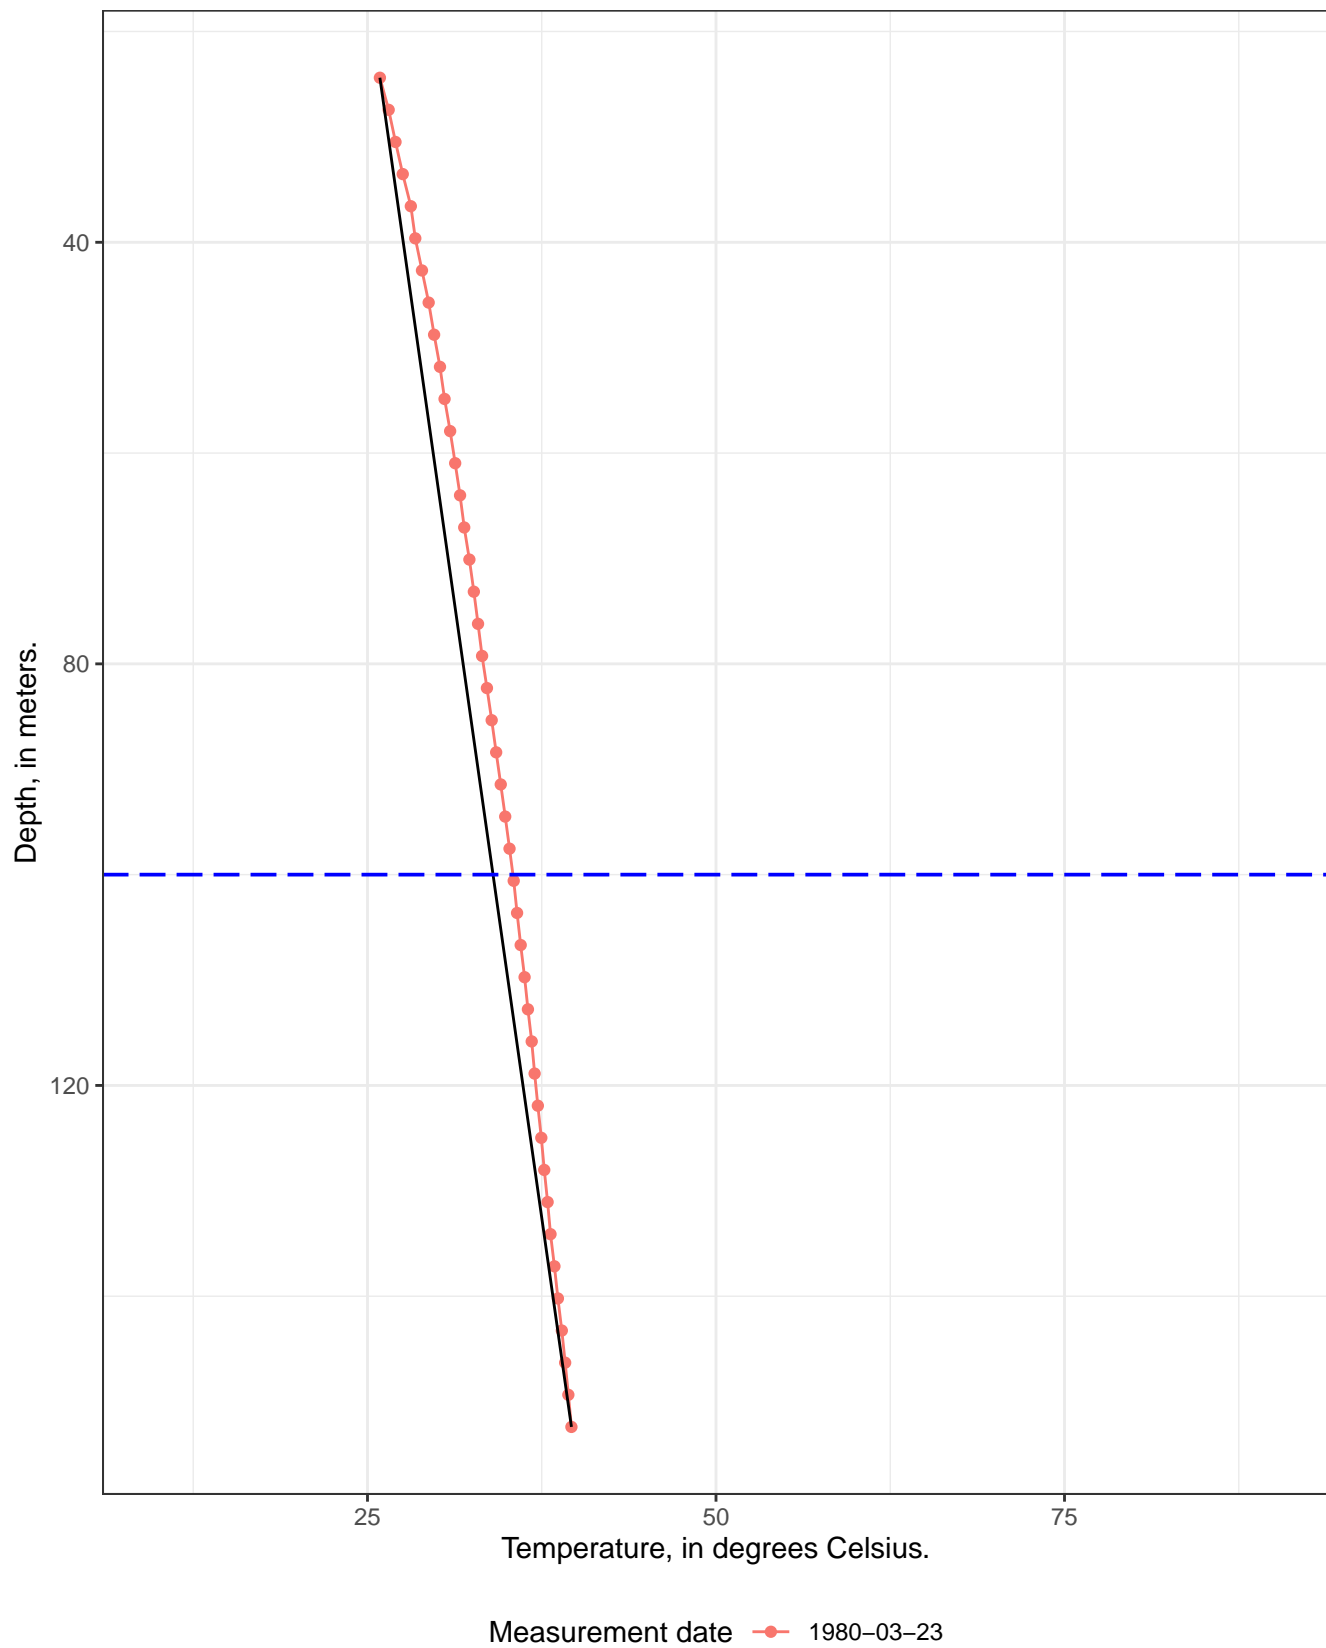

ID: 86 [H-2-80-1466\_KILBOURNE\_HOLE]

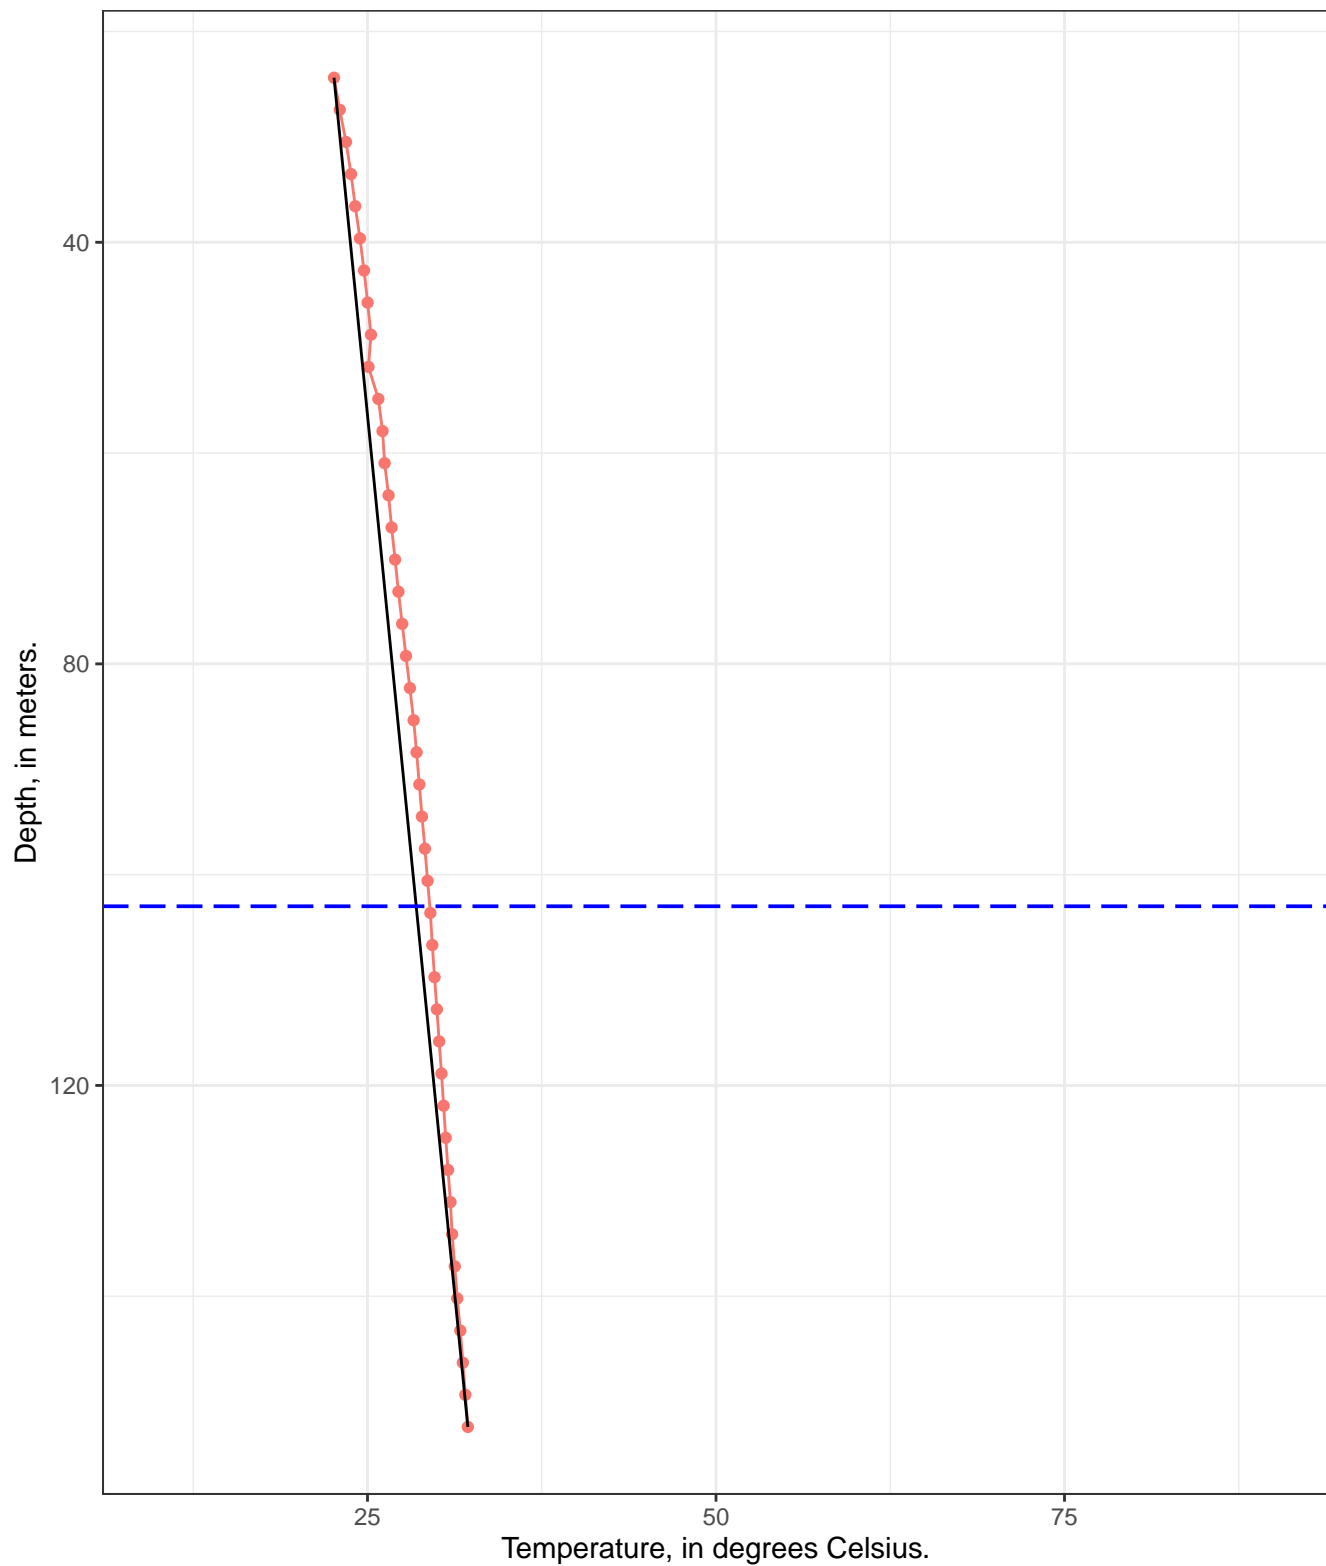

ID: 87 [H-2-80-1467\_KILBOURNE\_HOLE]

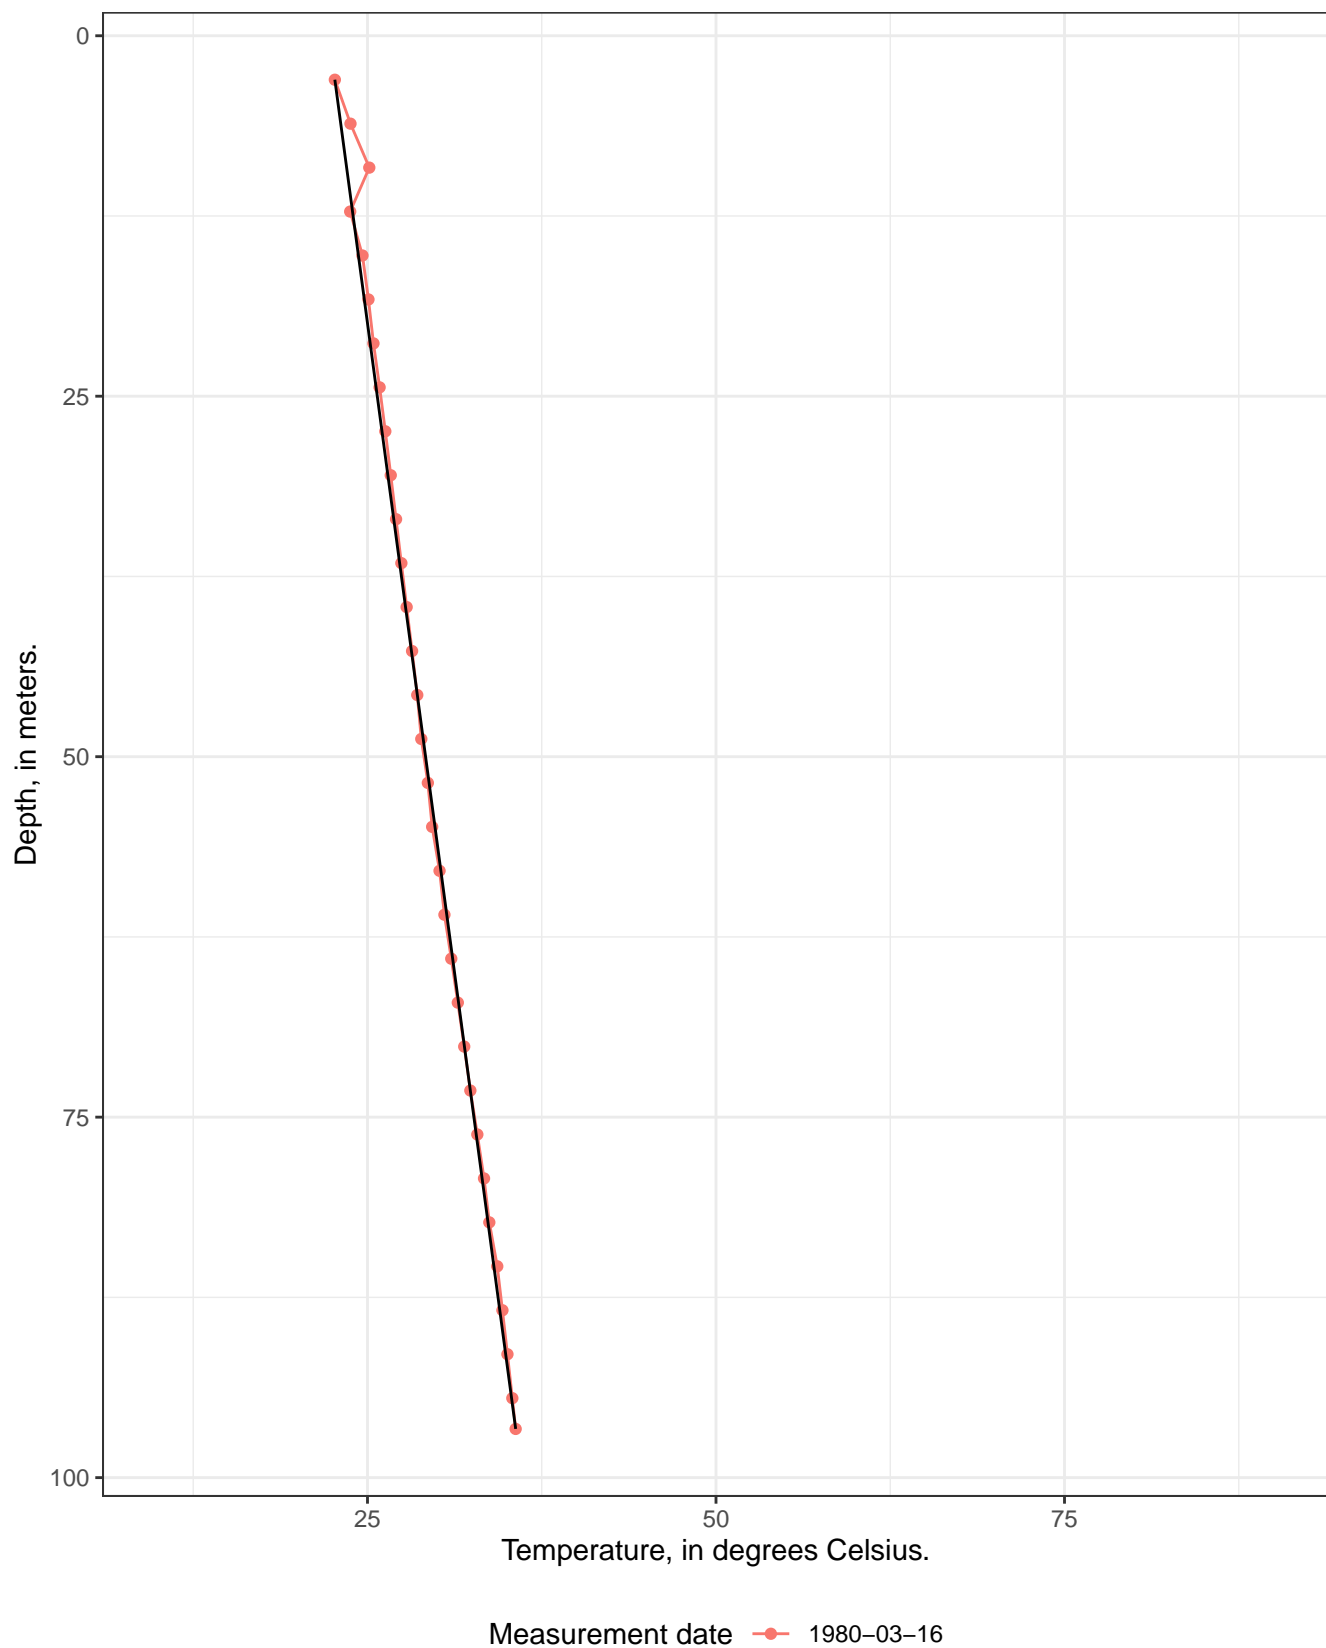



ID: 88 [H-2-80-1473\_KILBOURNE\_HOLE]

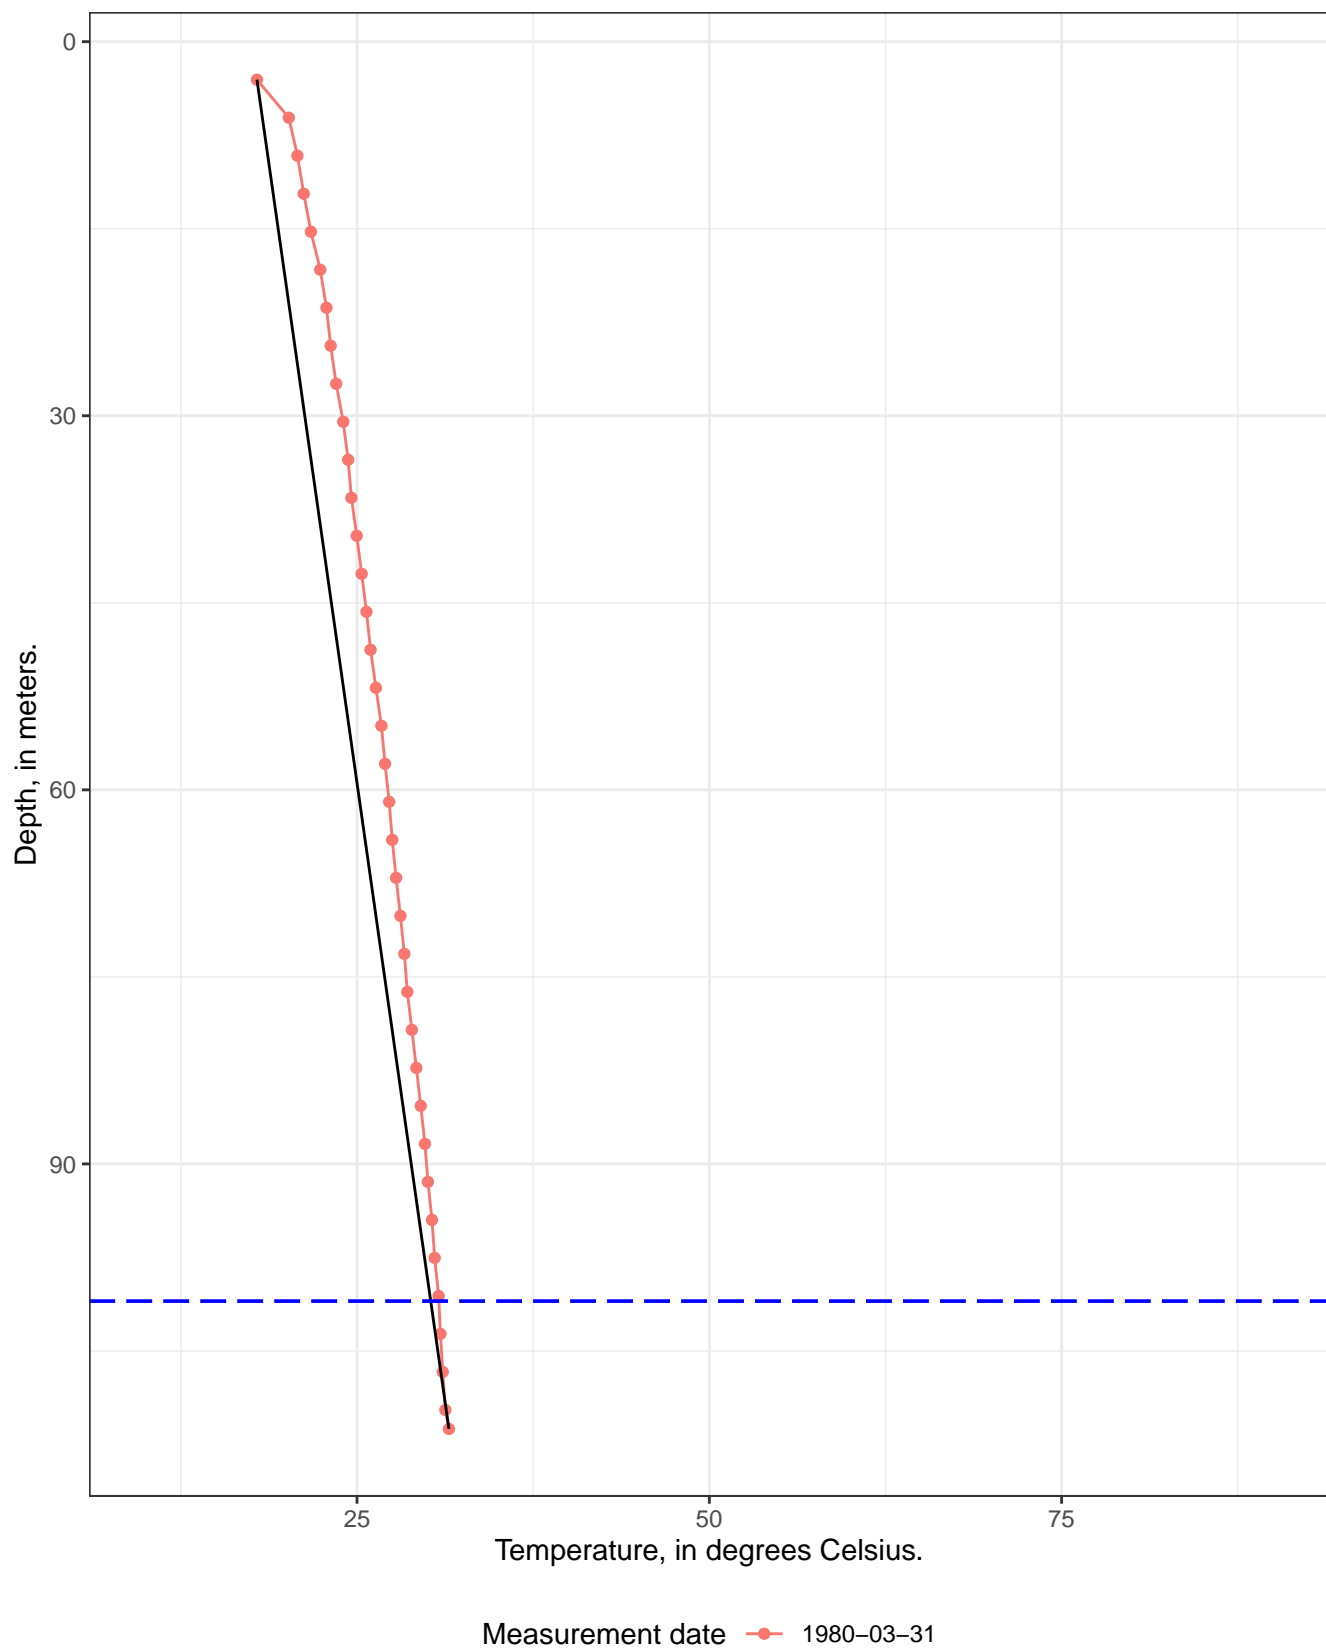

ID: 89 [H-2-80-1478\_KILBOURNE\_HOLE]

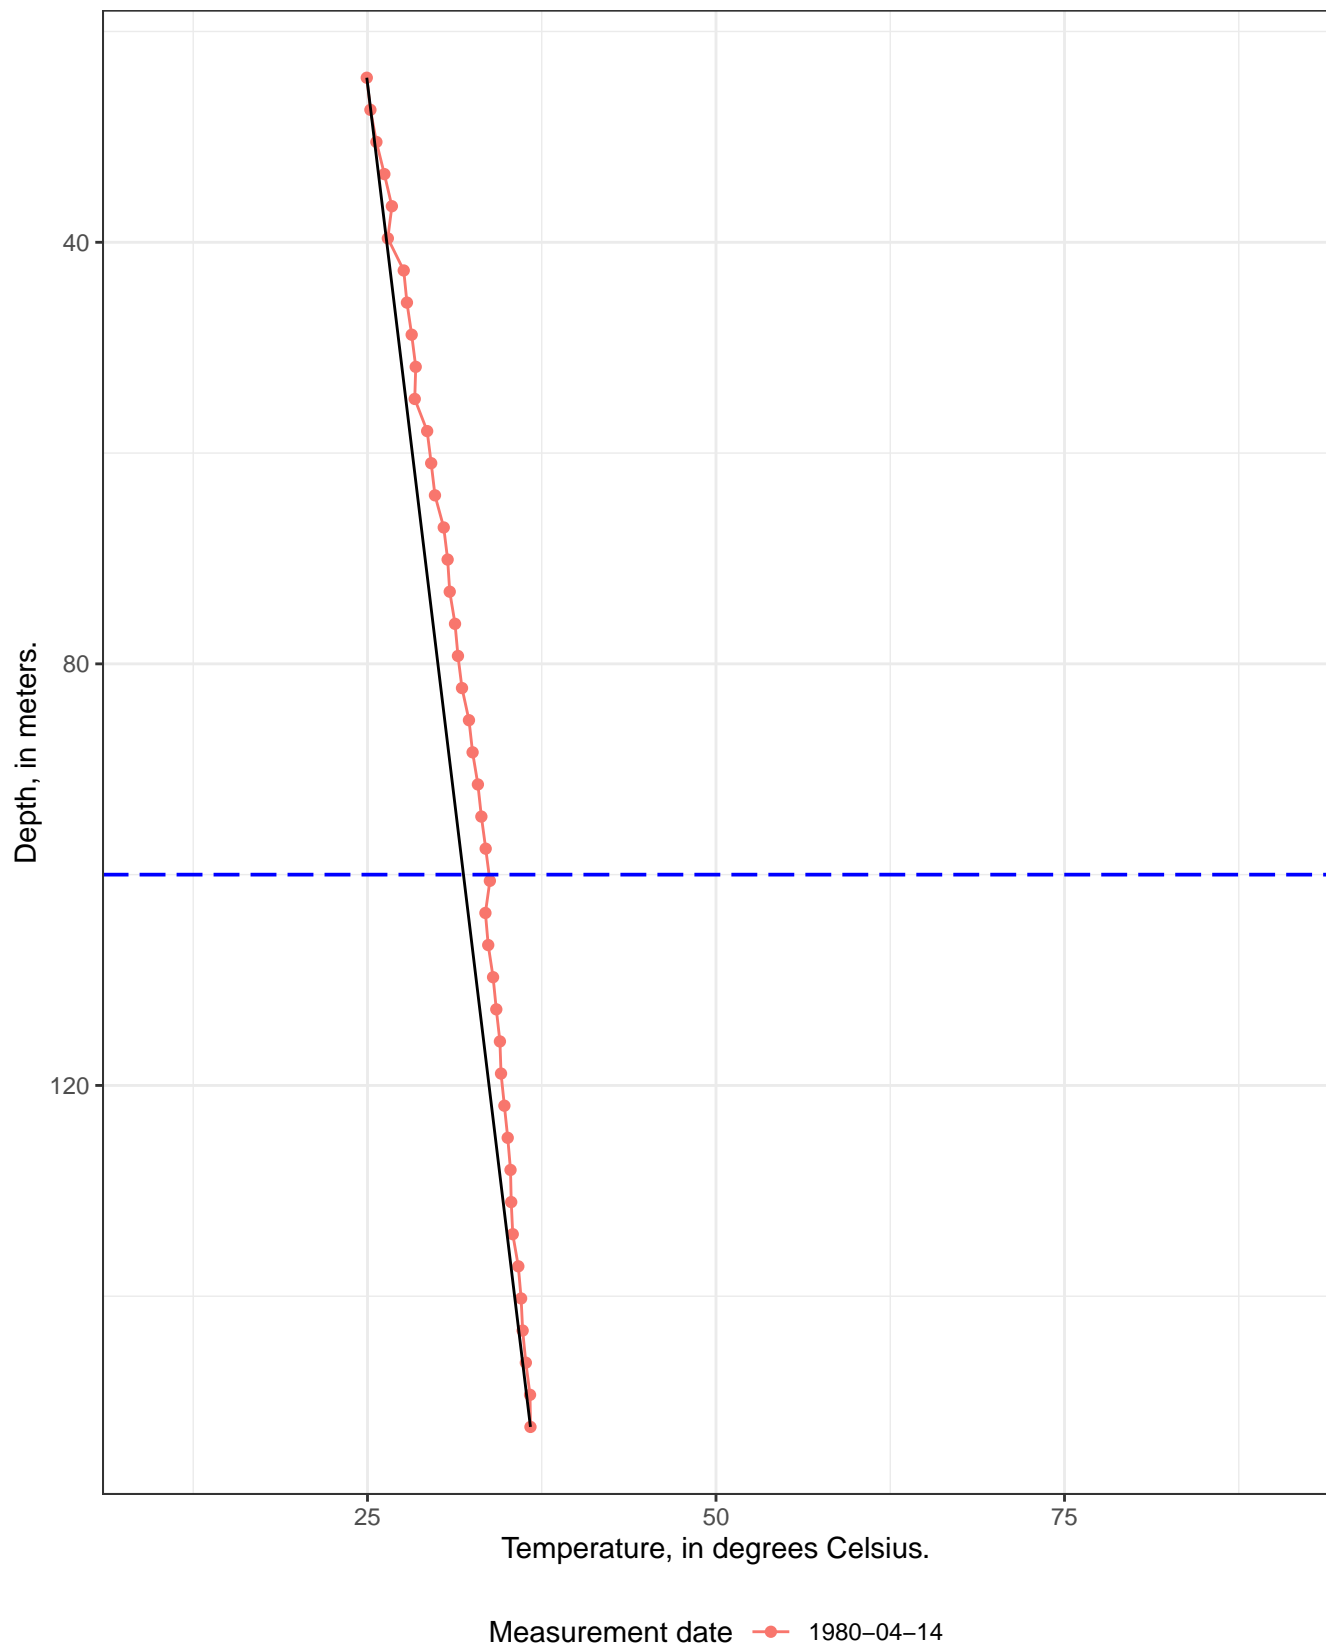

ID: 90 [H-2-80-1479\_KILBOURNE\_HOLE]

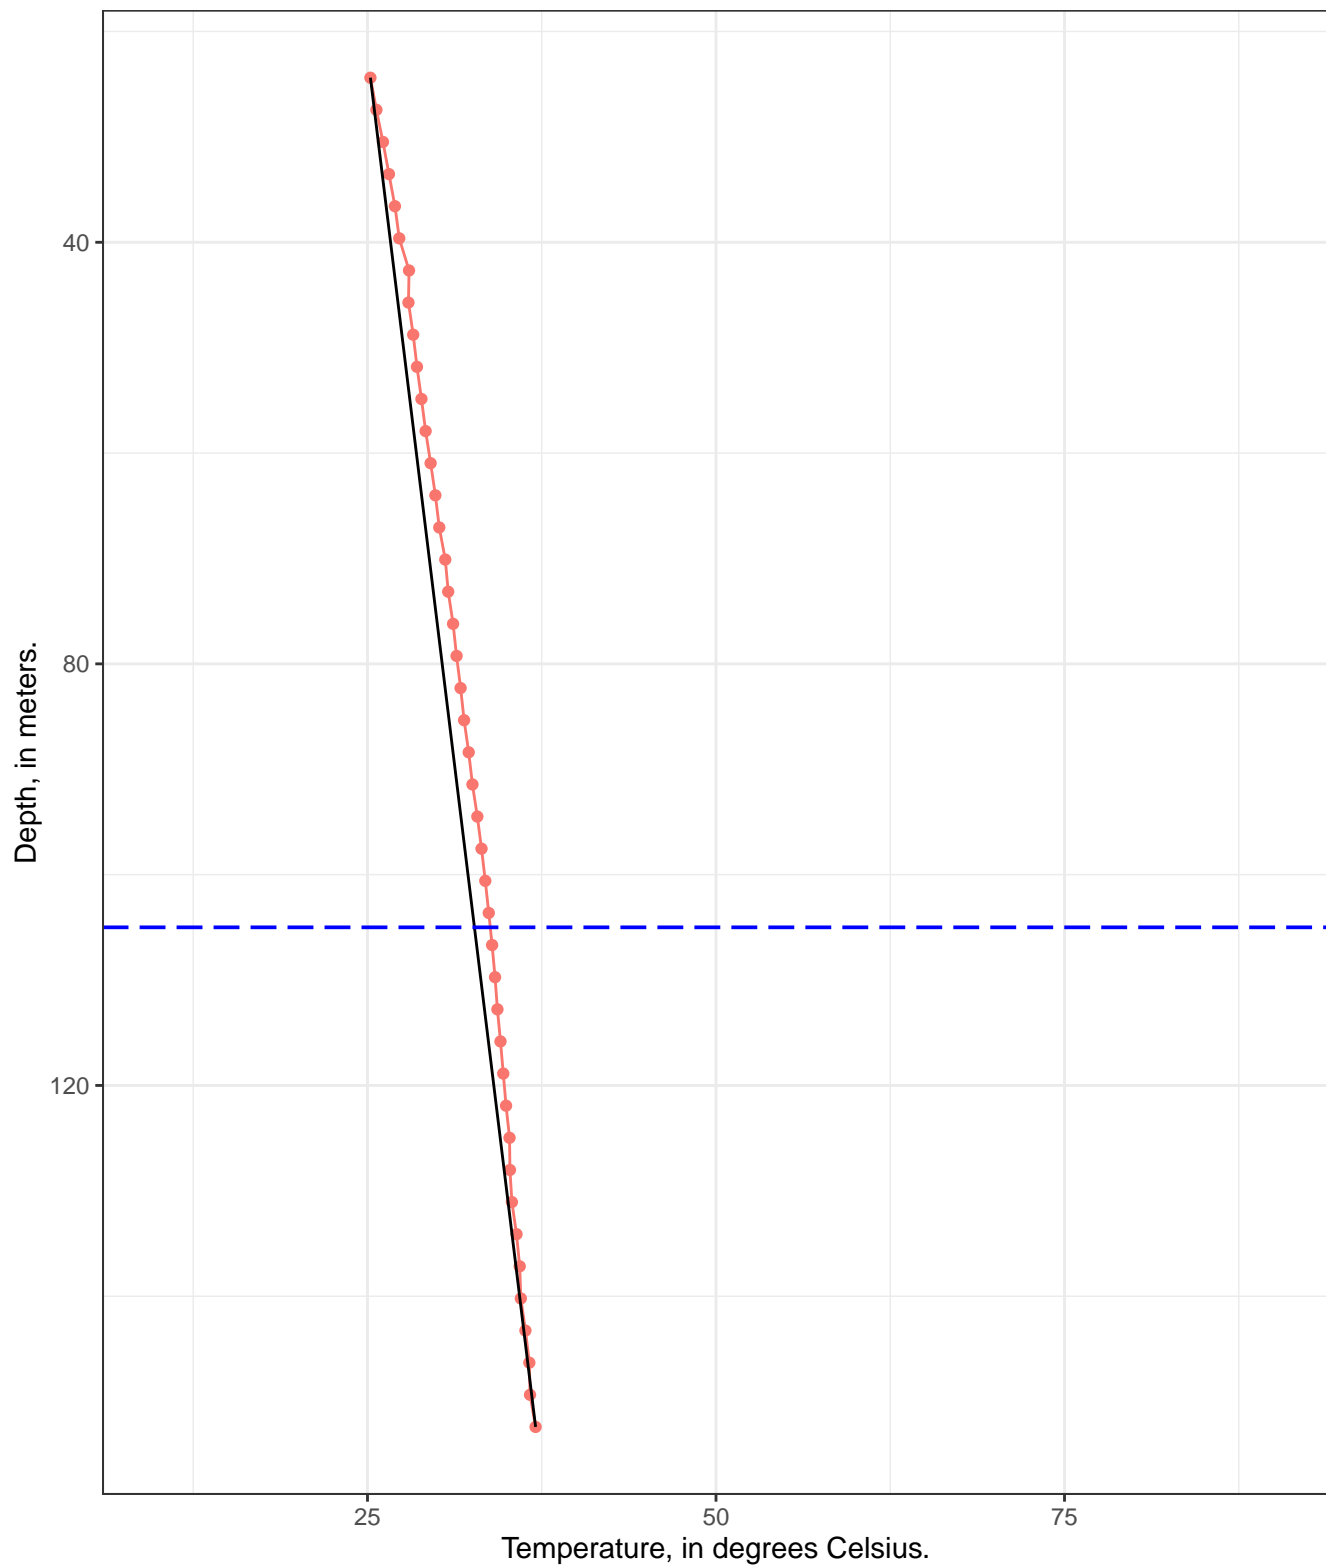

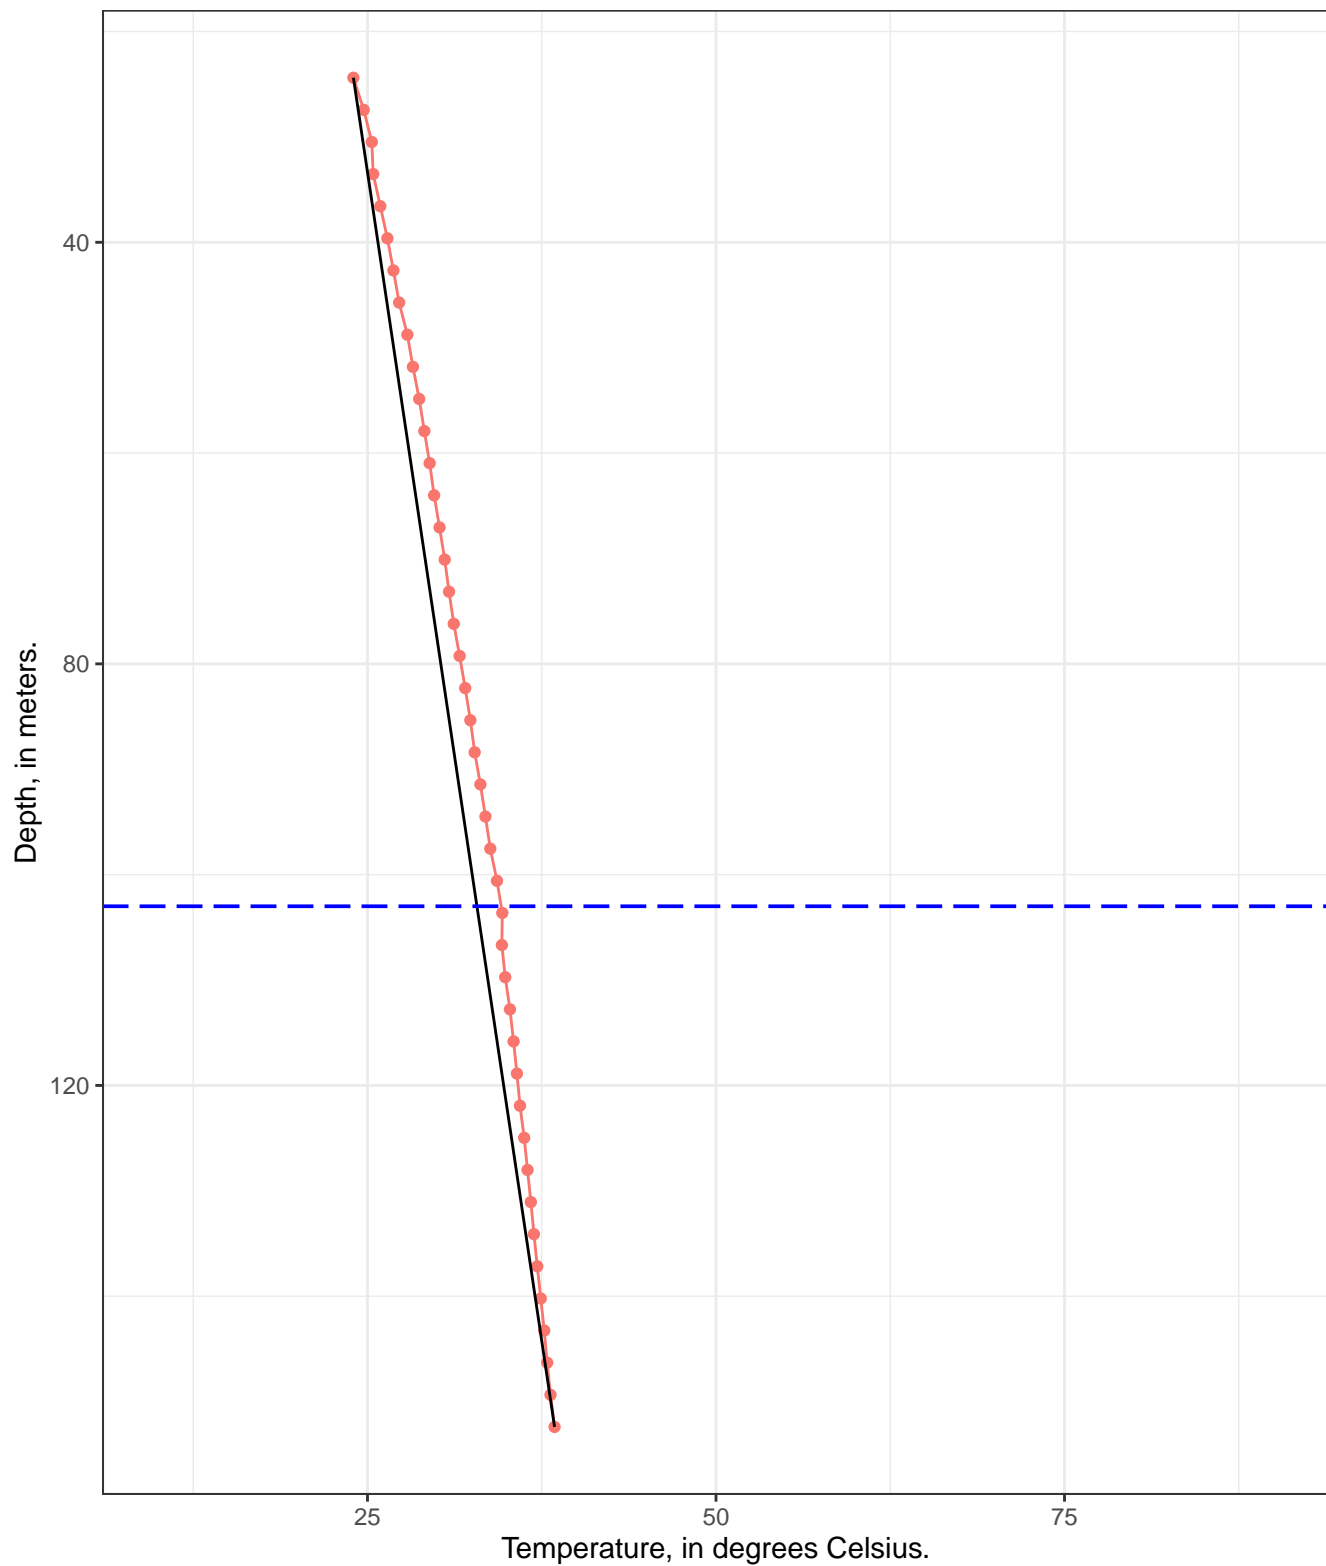

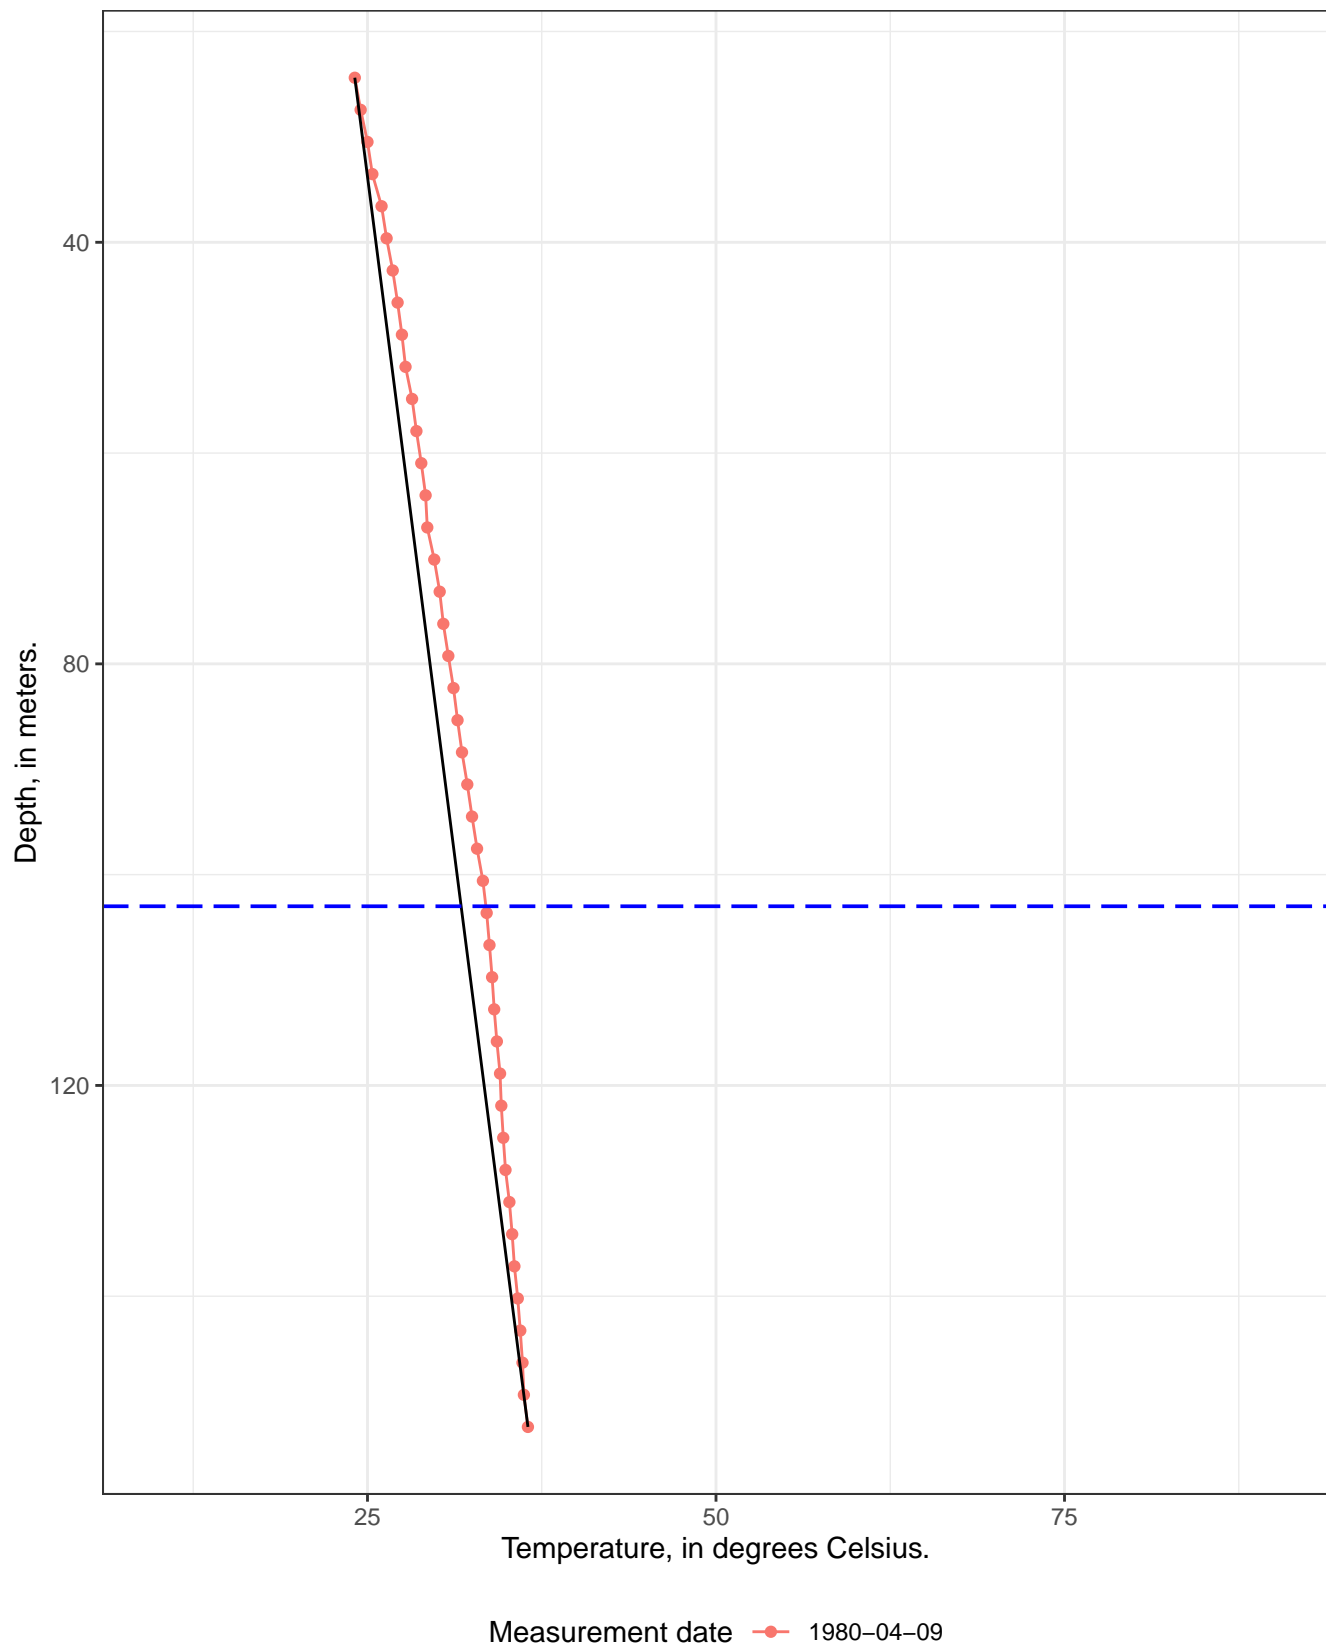

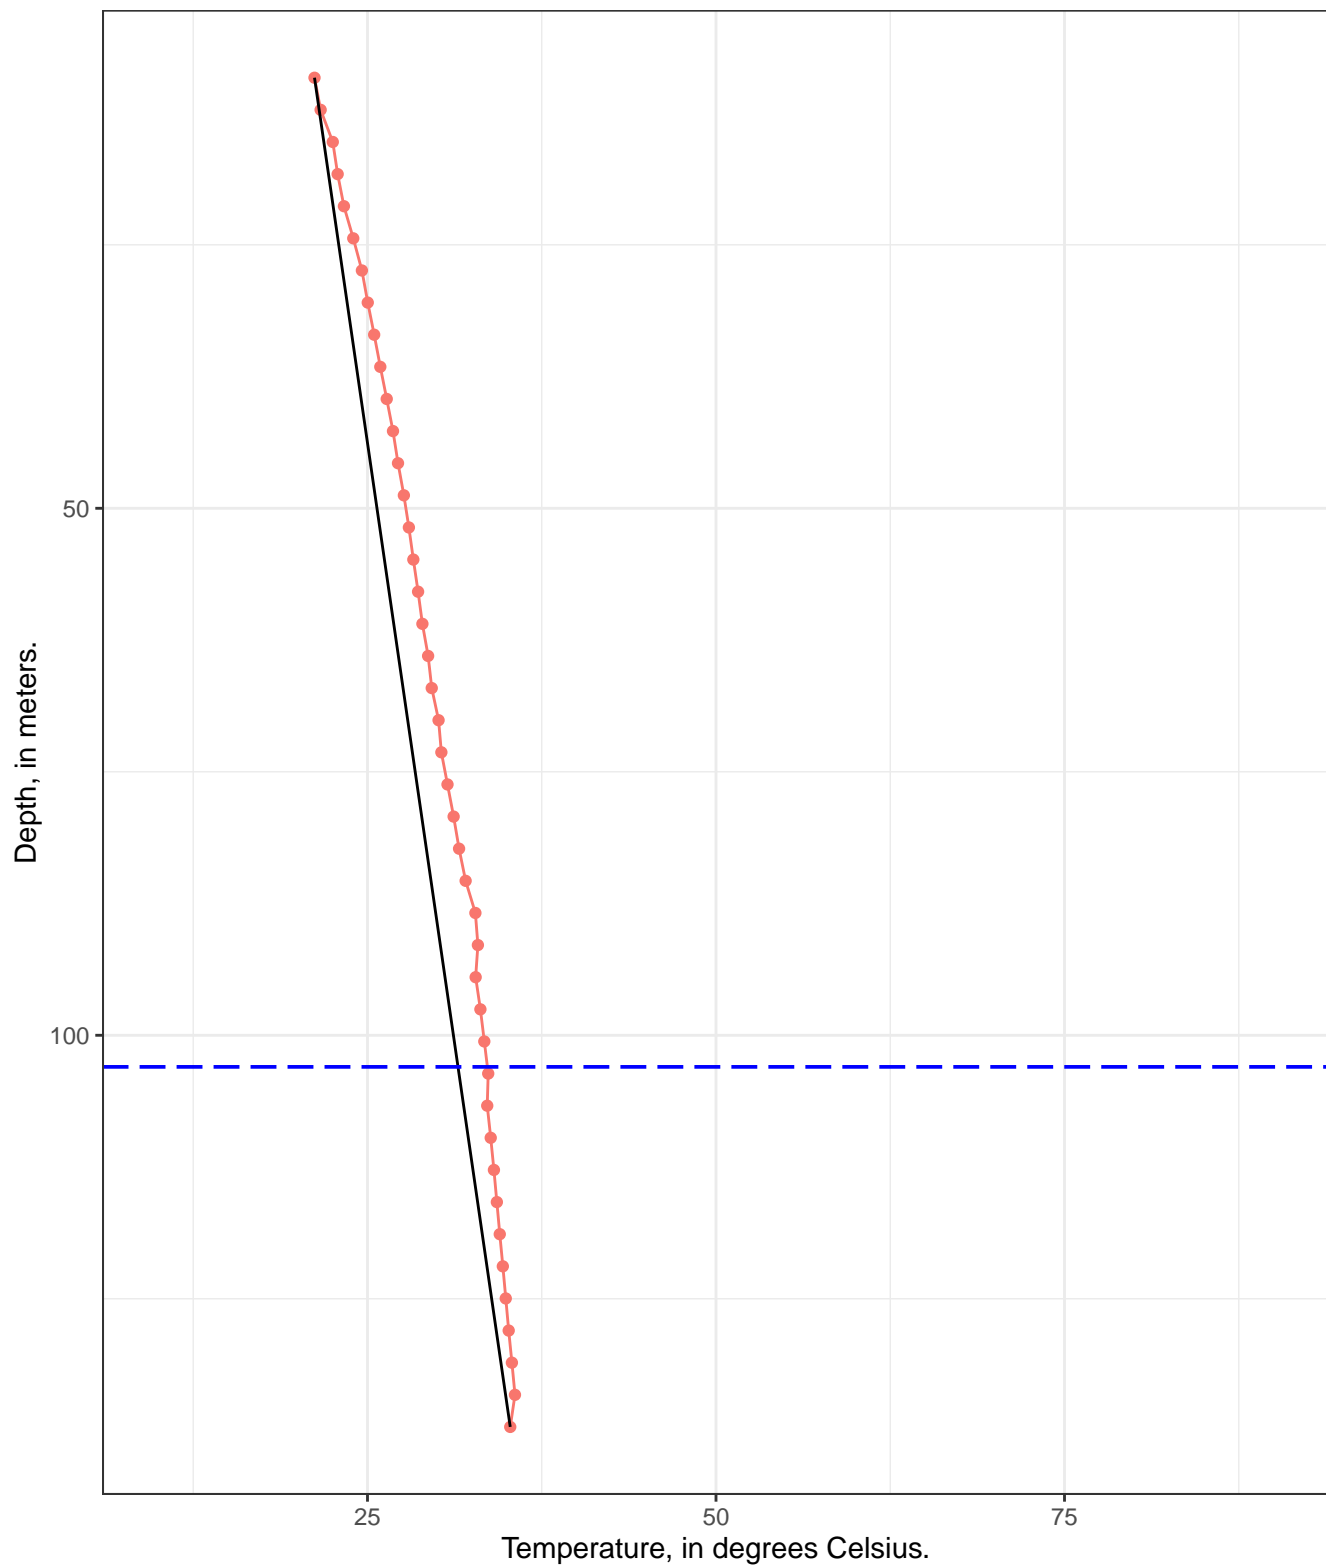

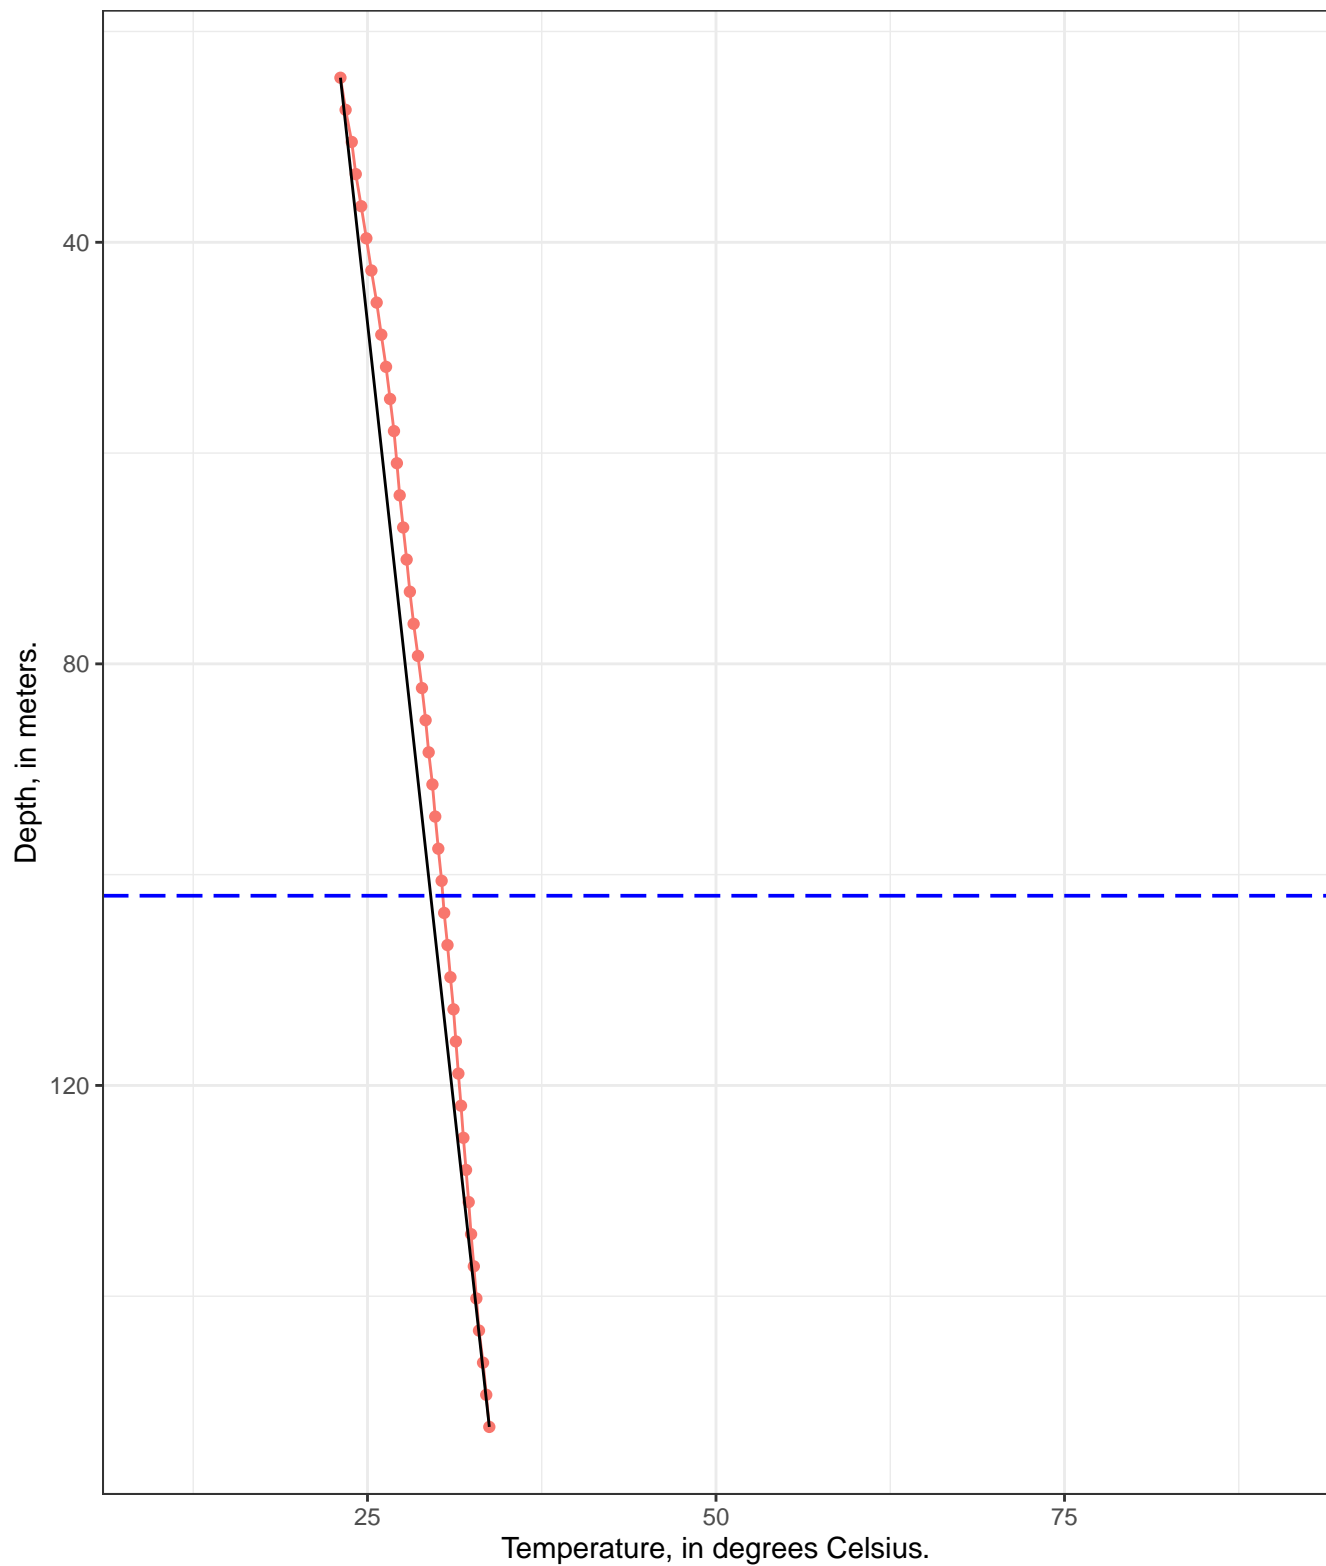

ID: 95 [H-2-80-1484\_KILBOURNE\_HOLE]

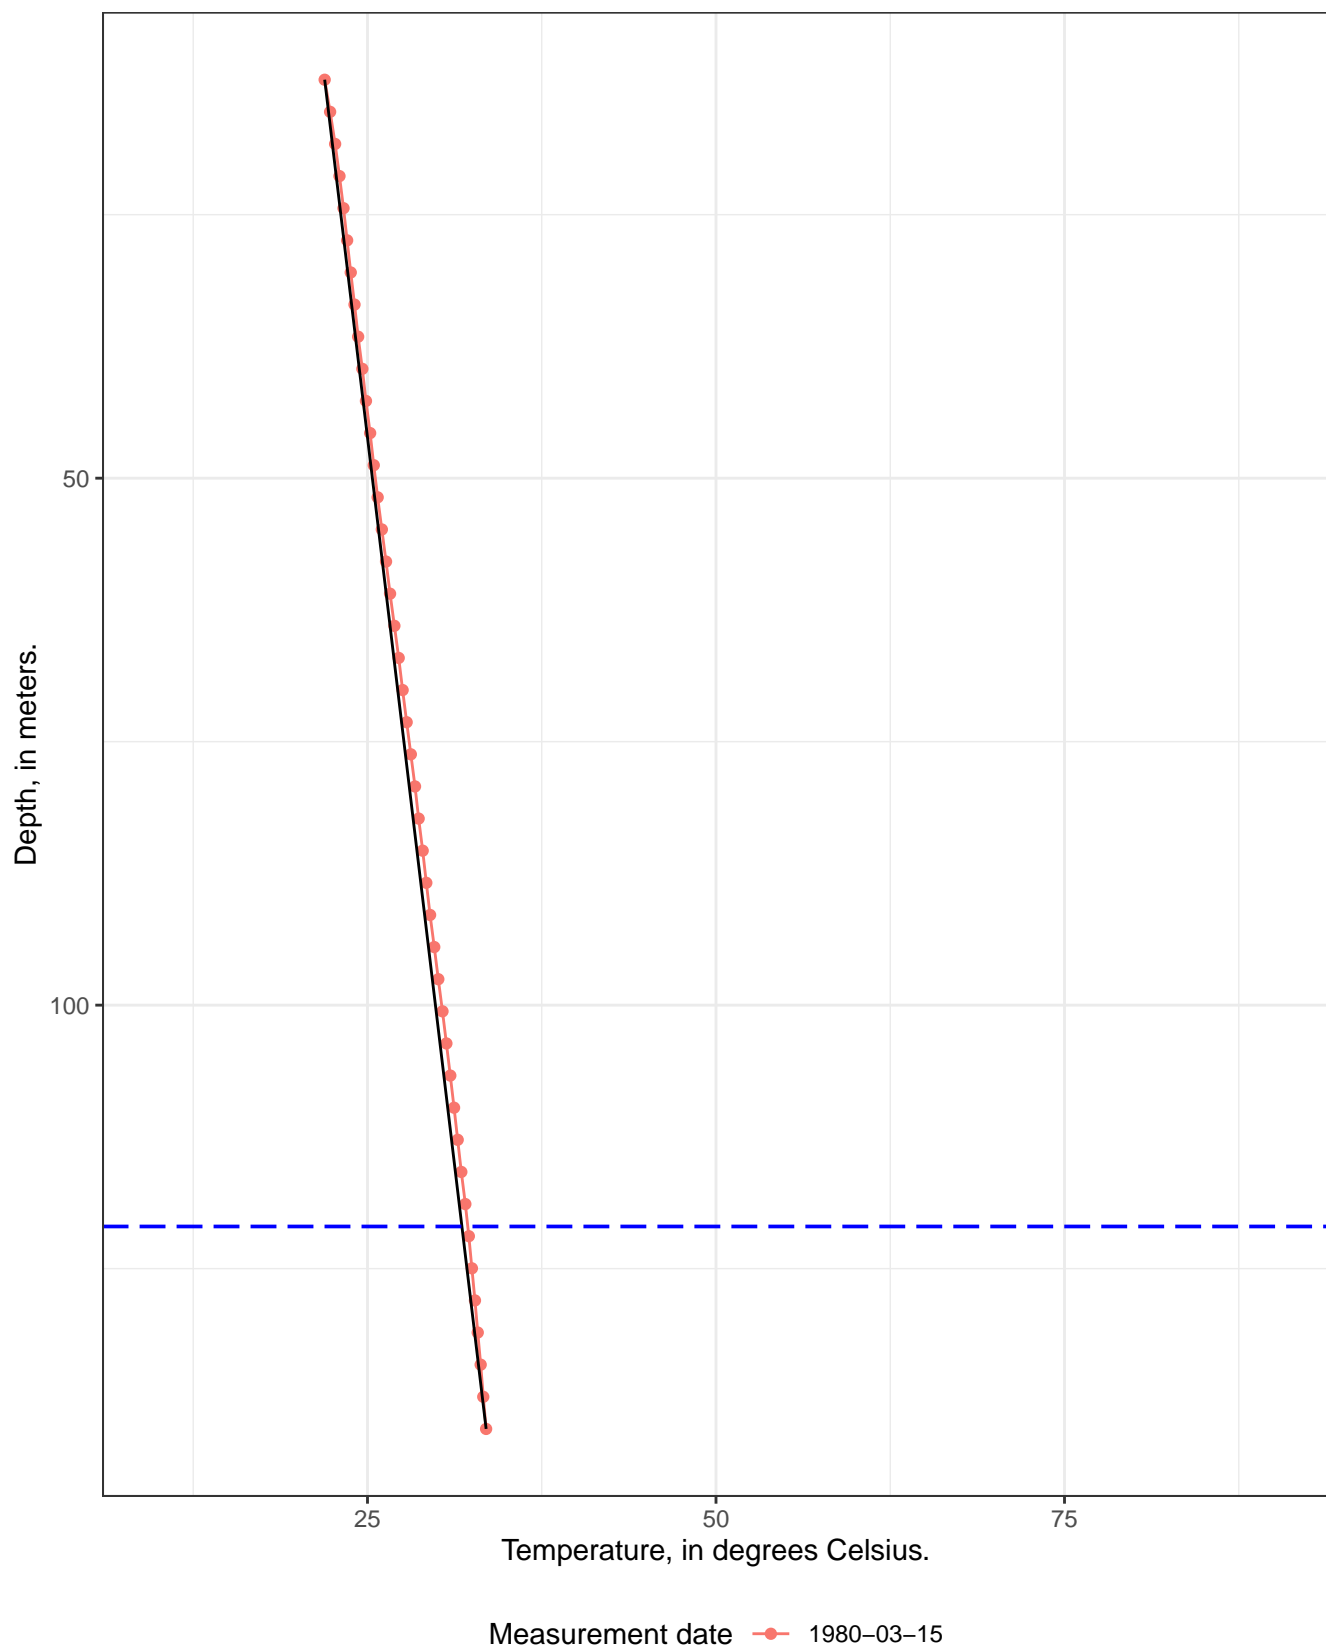



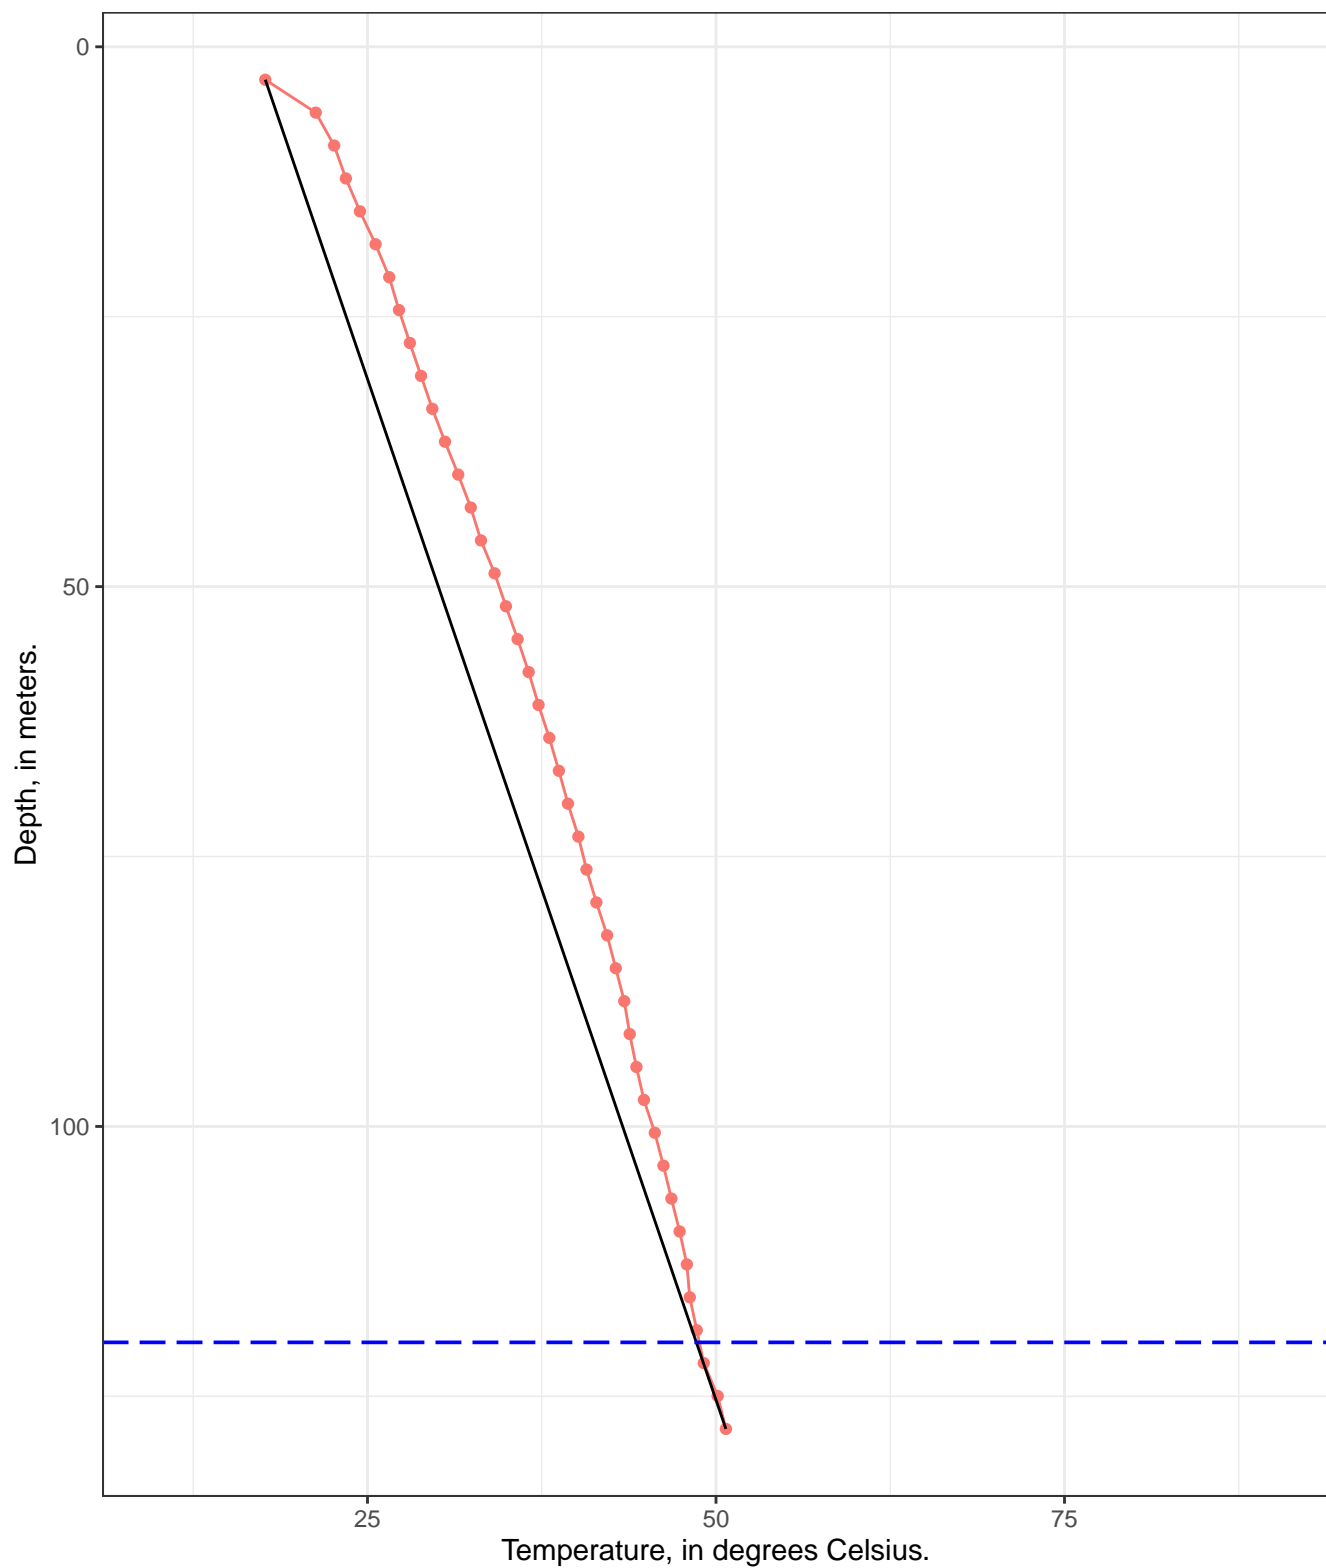

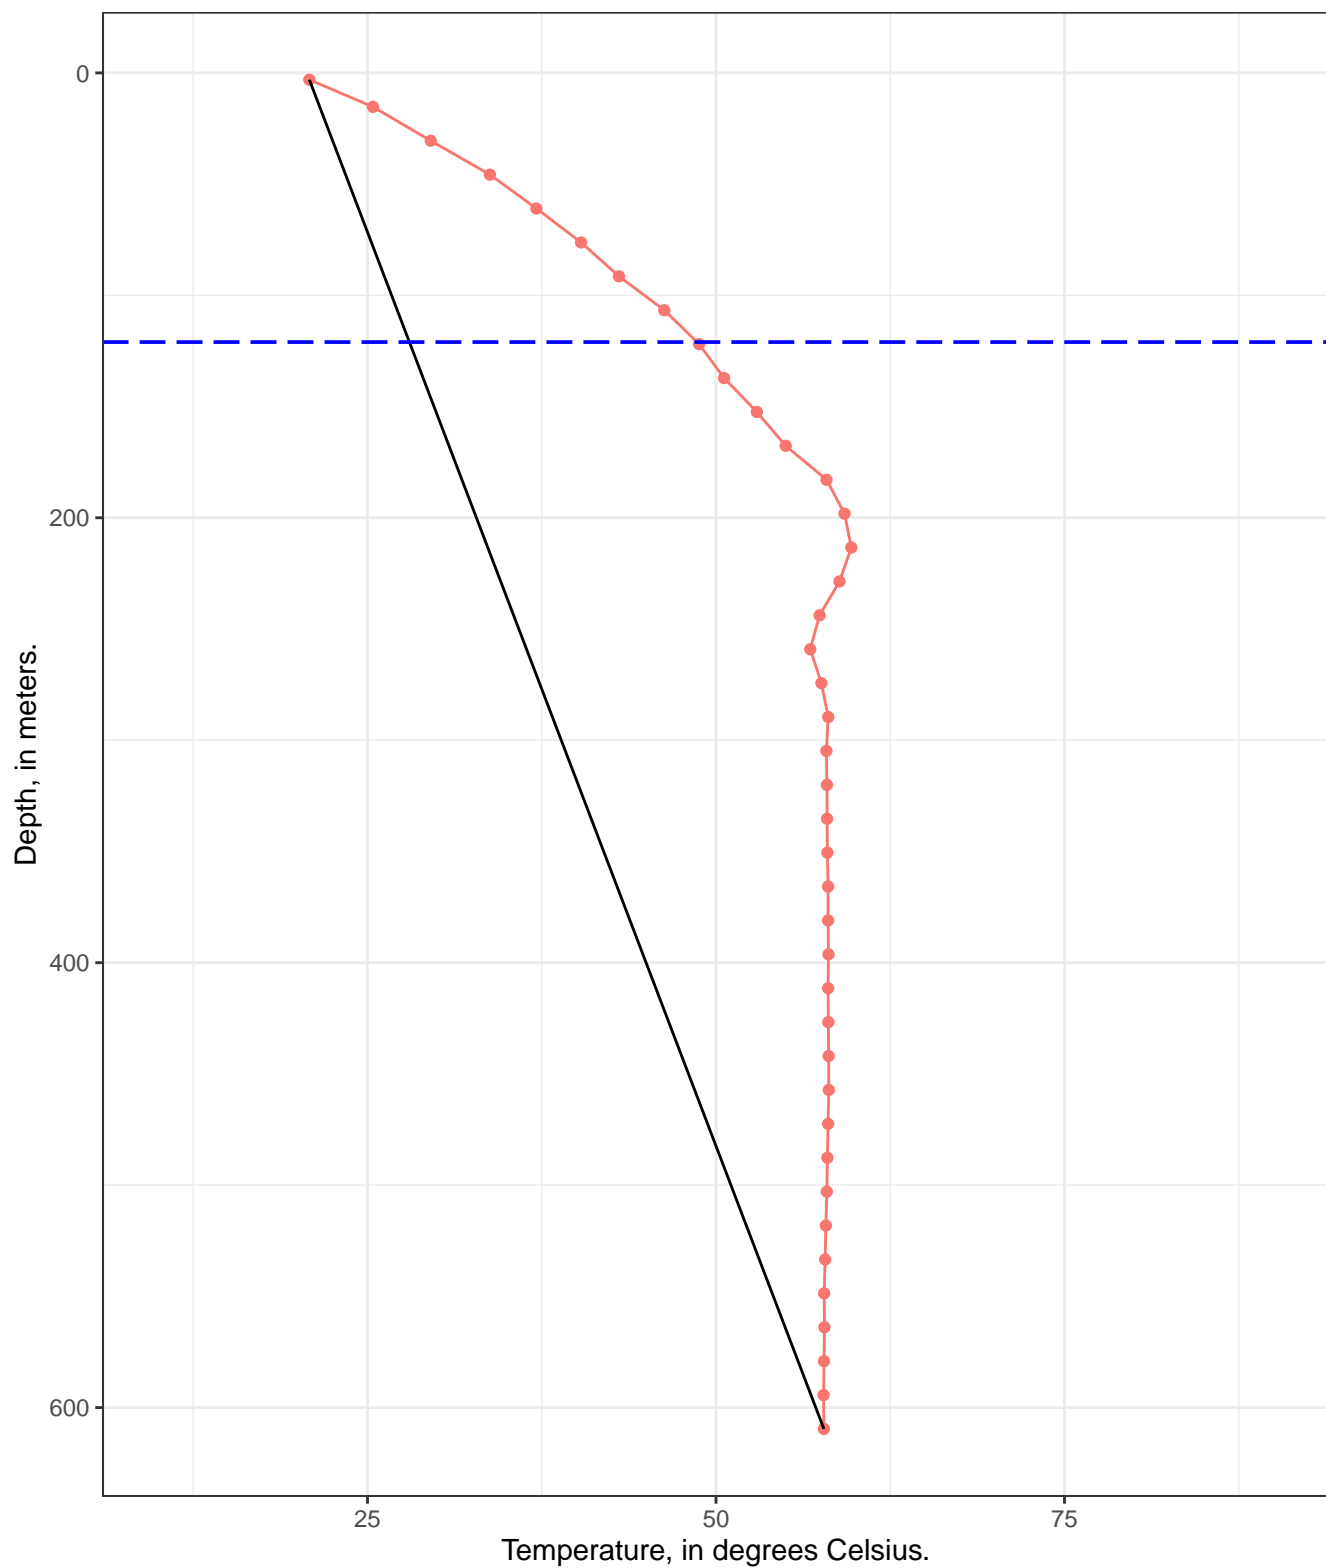

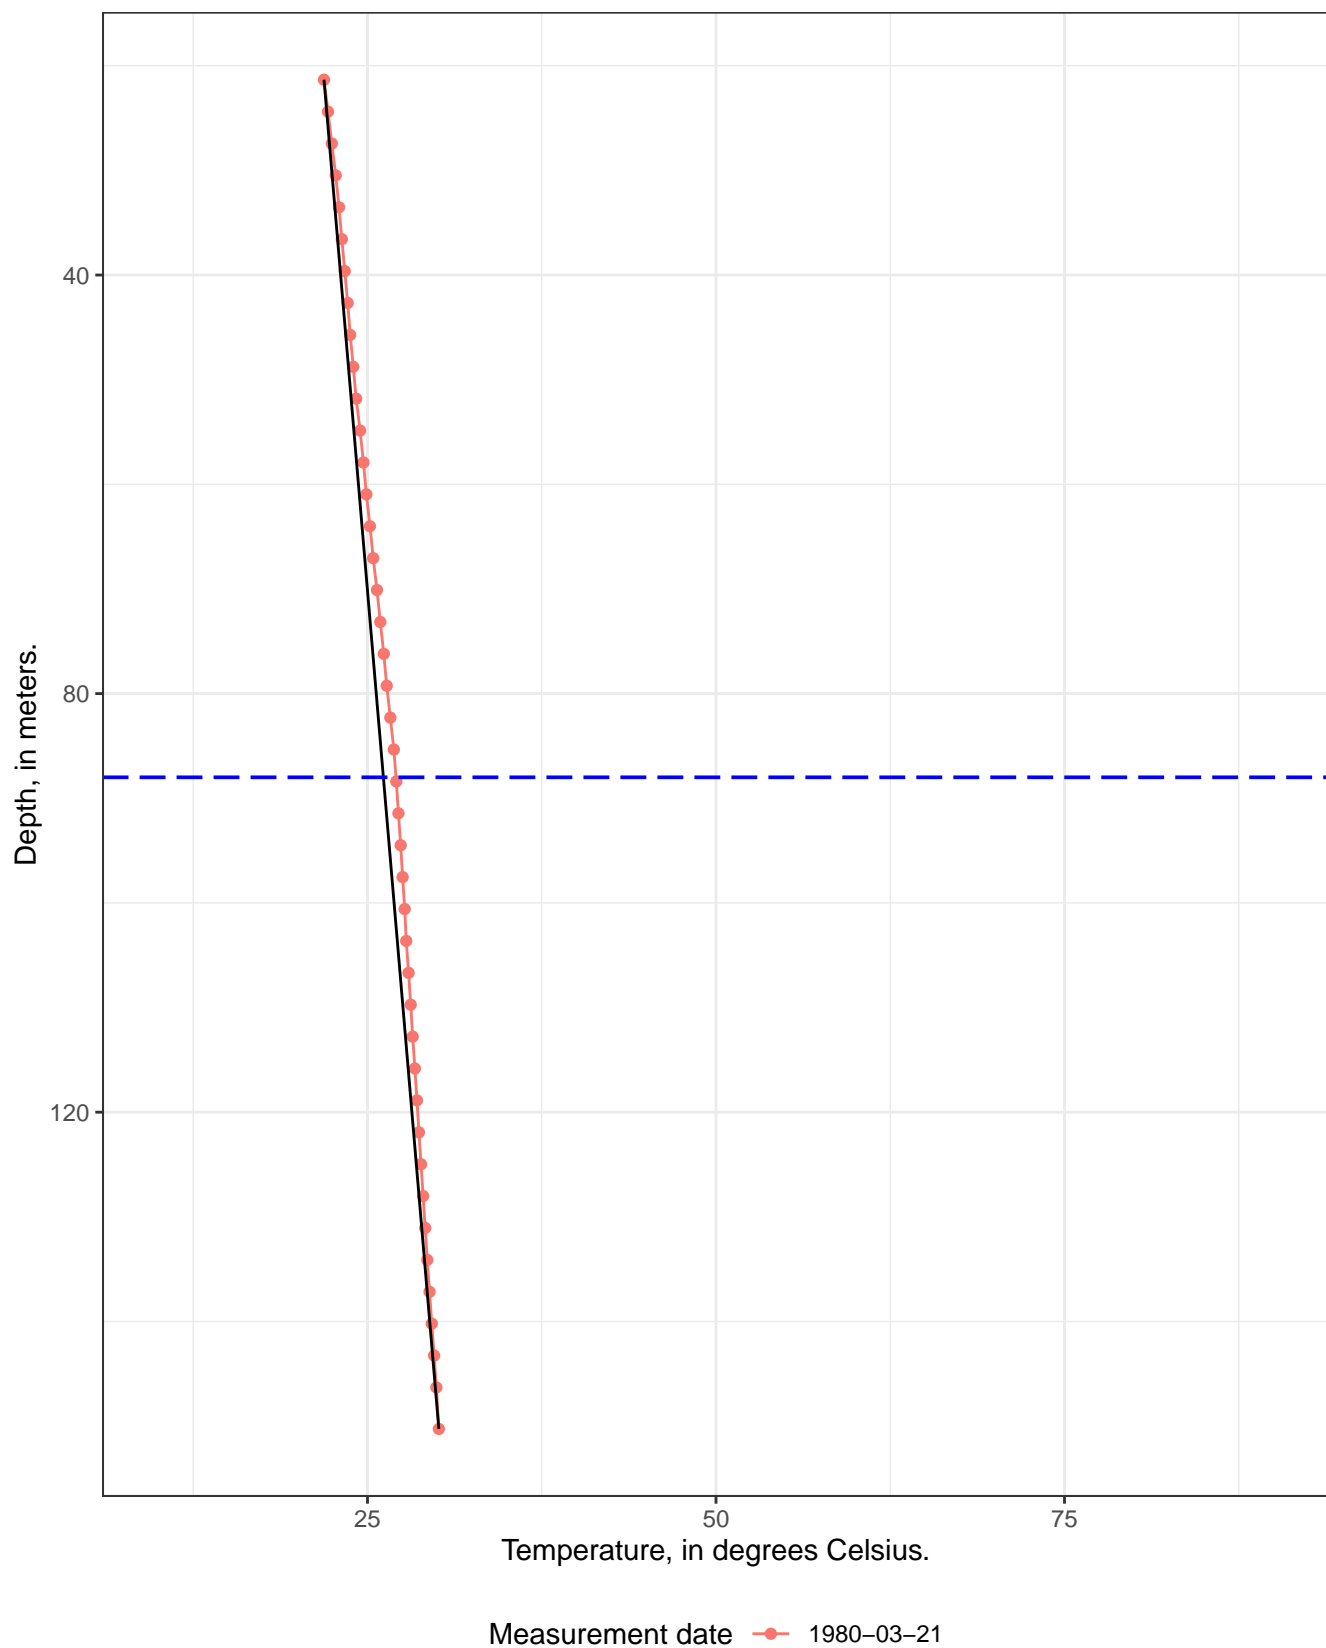

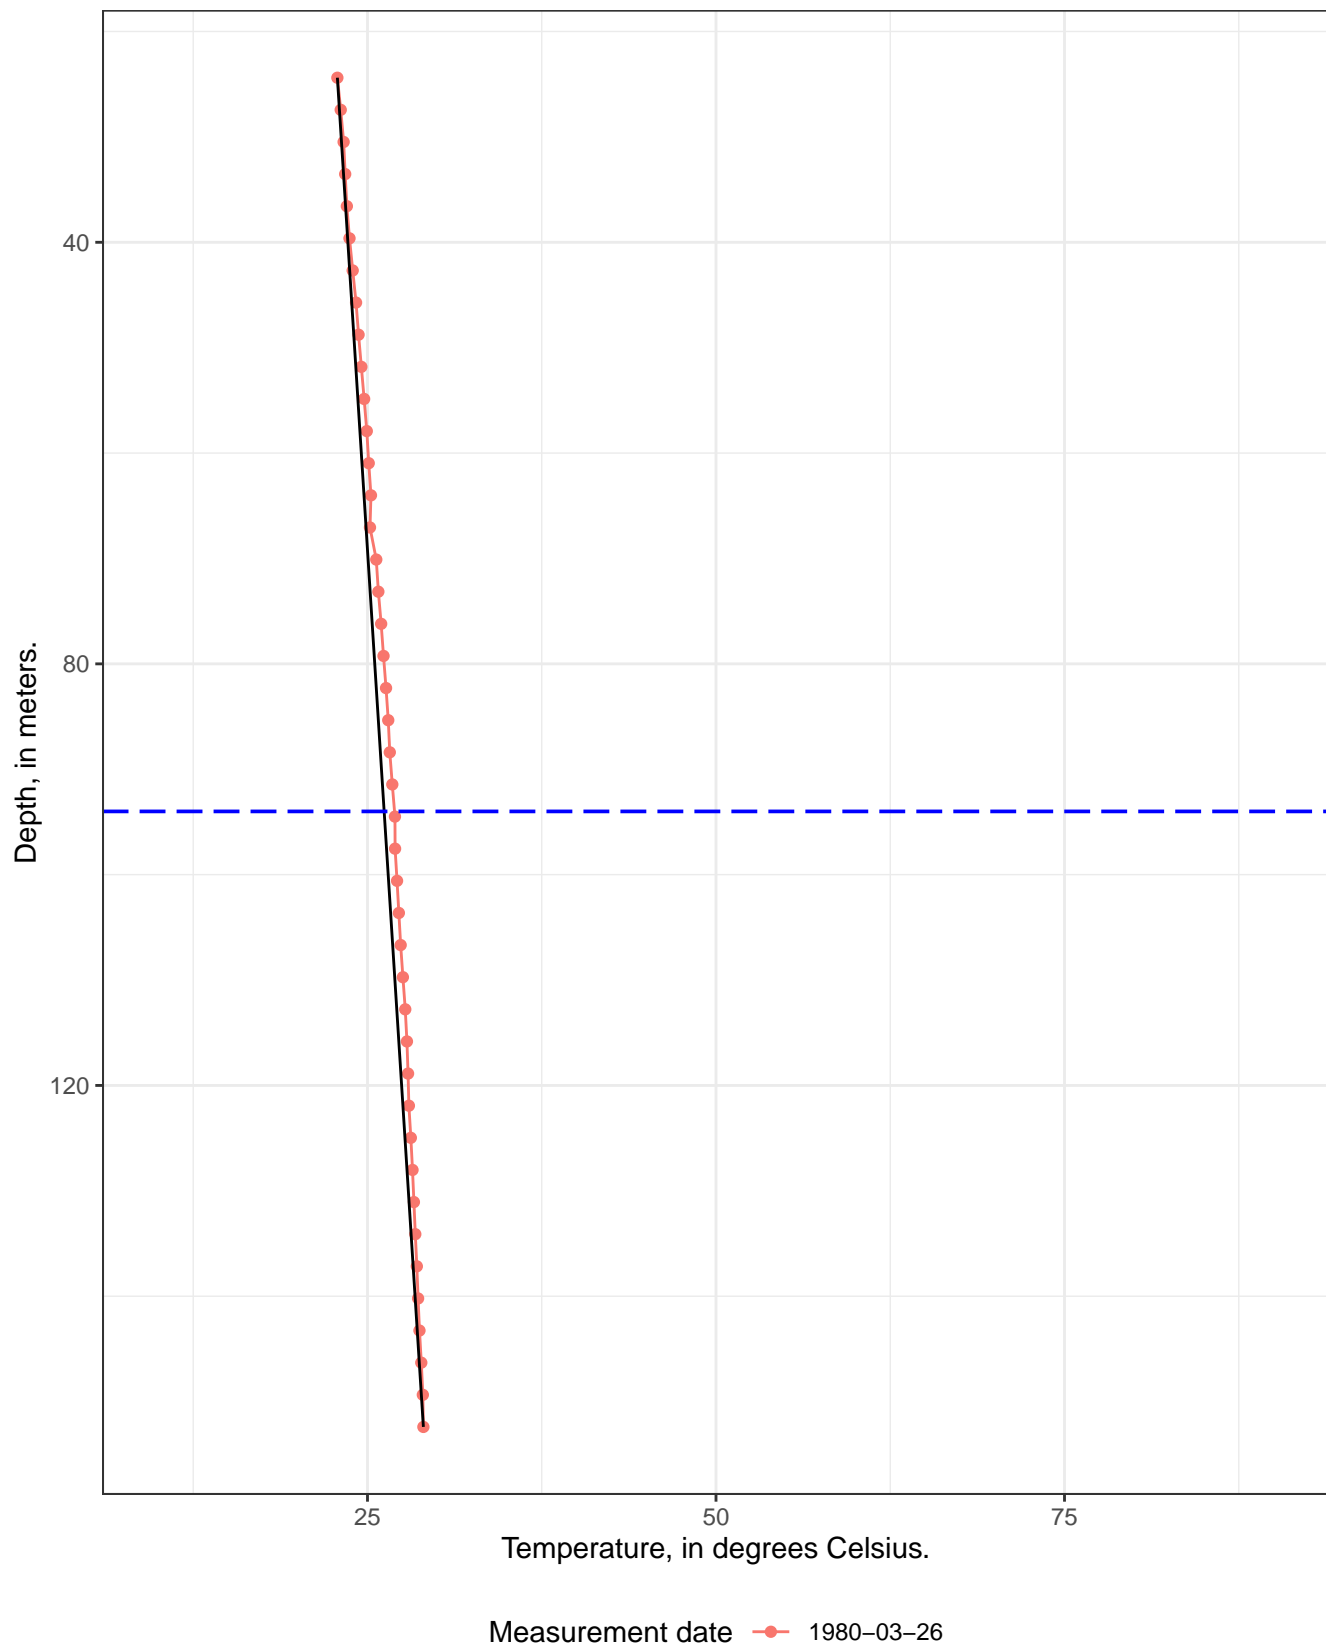

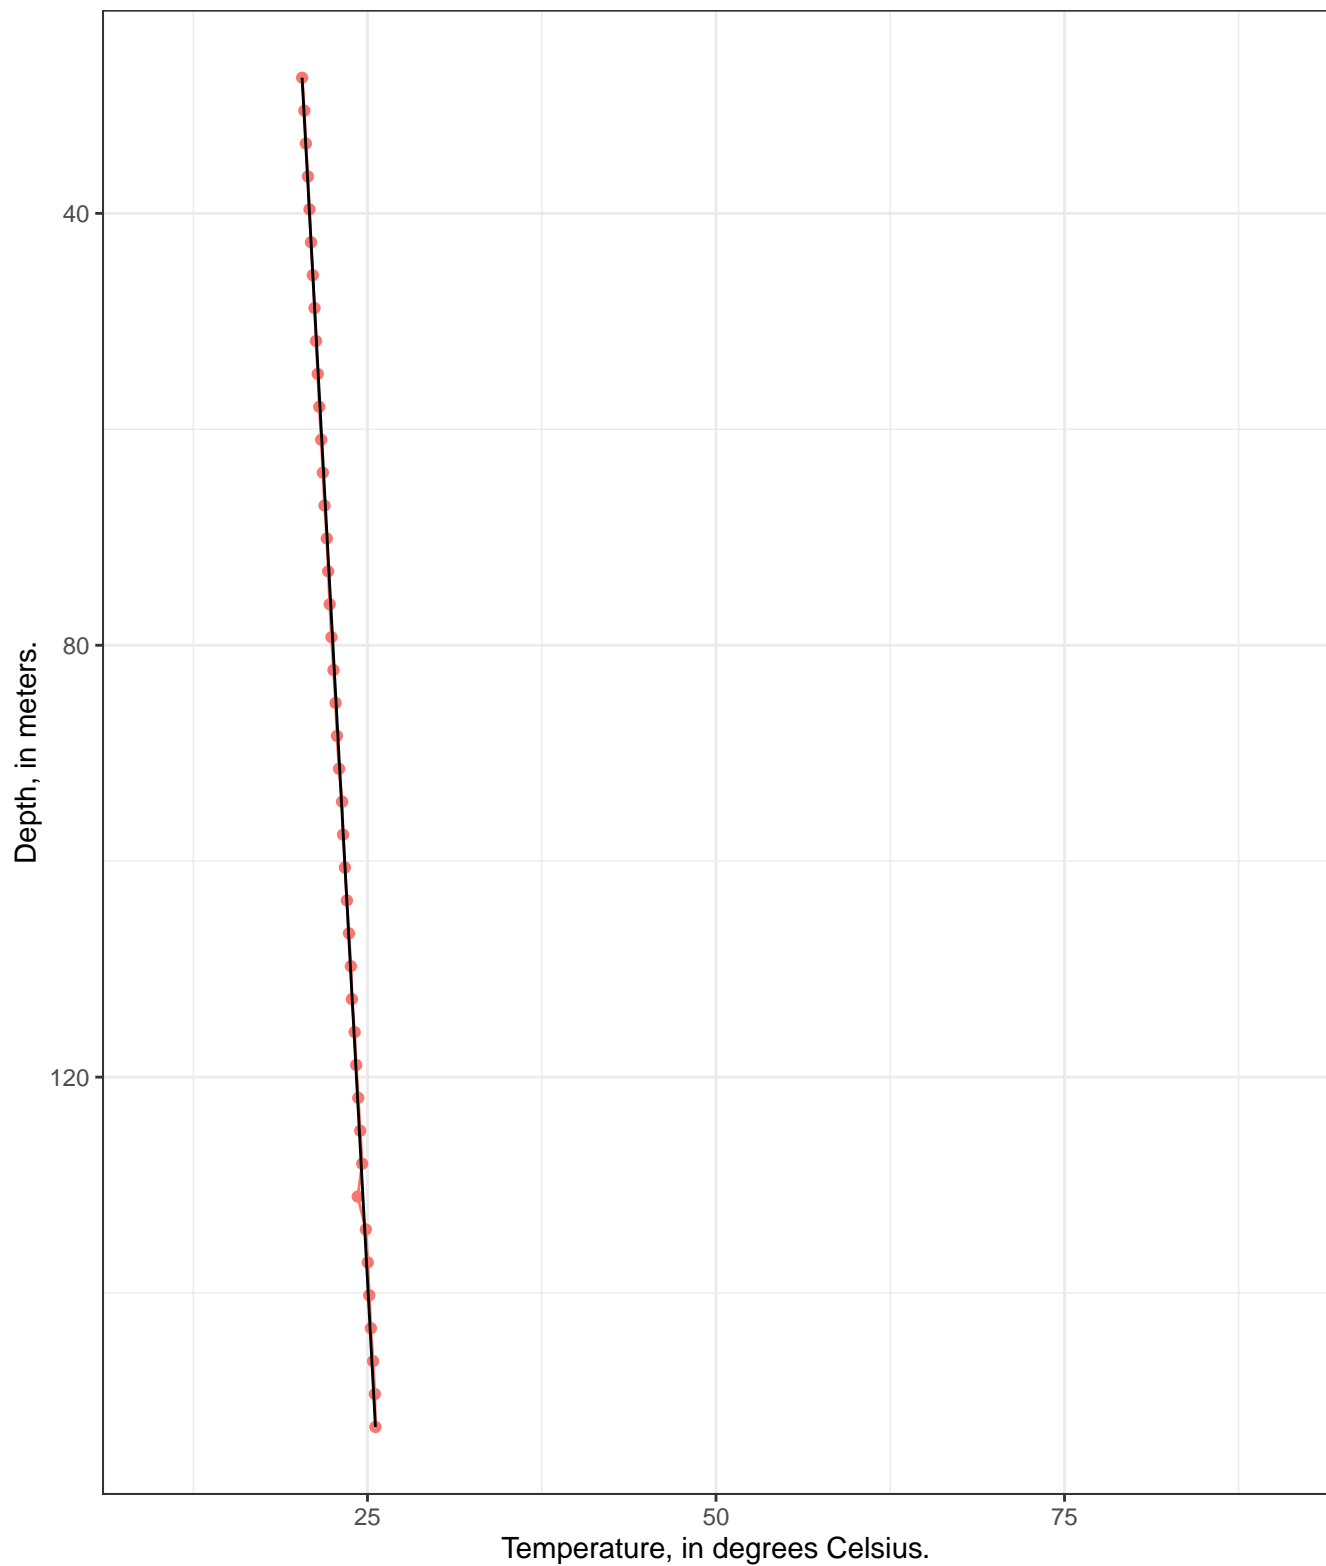

ID: 101 [H-22-76-10\_KILBOURNE\_HOLE]

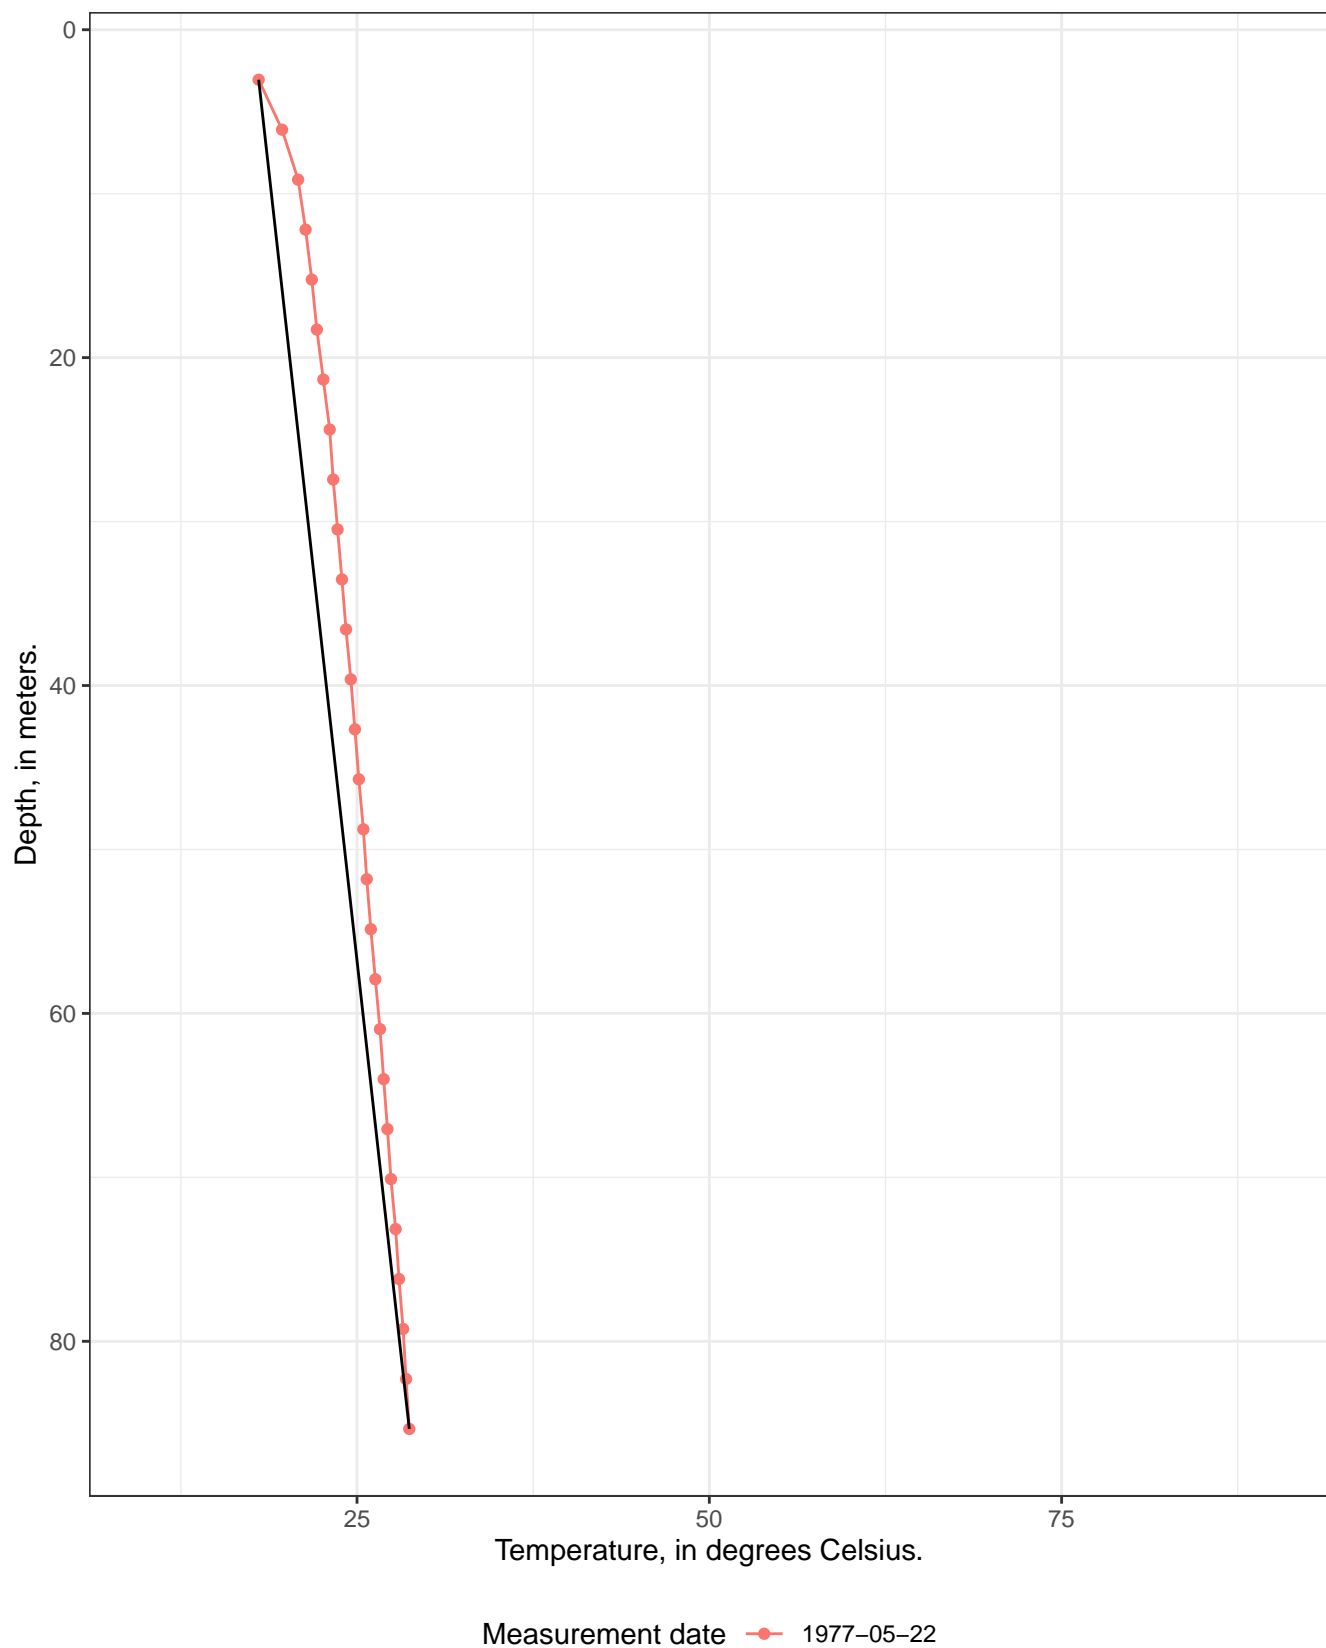

ID: 102 [H-22-76-11\_KILBOURNE\_HOLE]

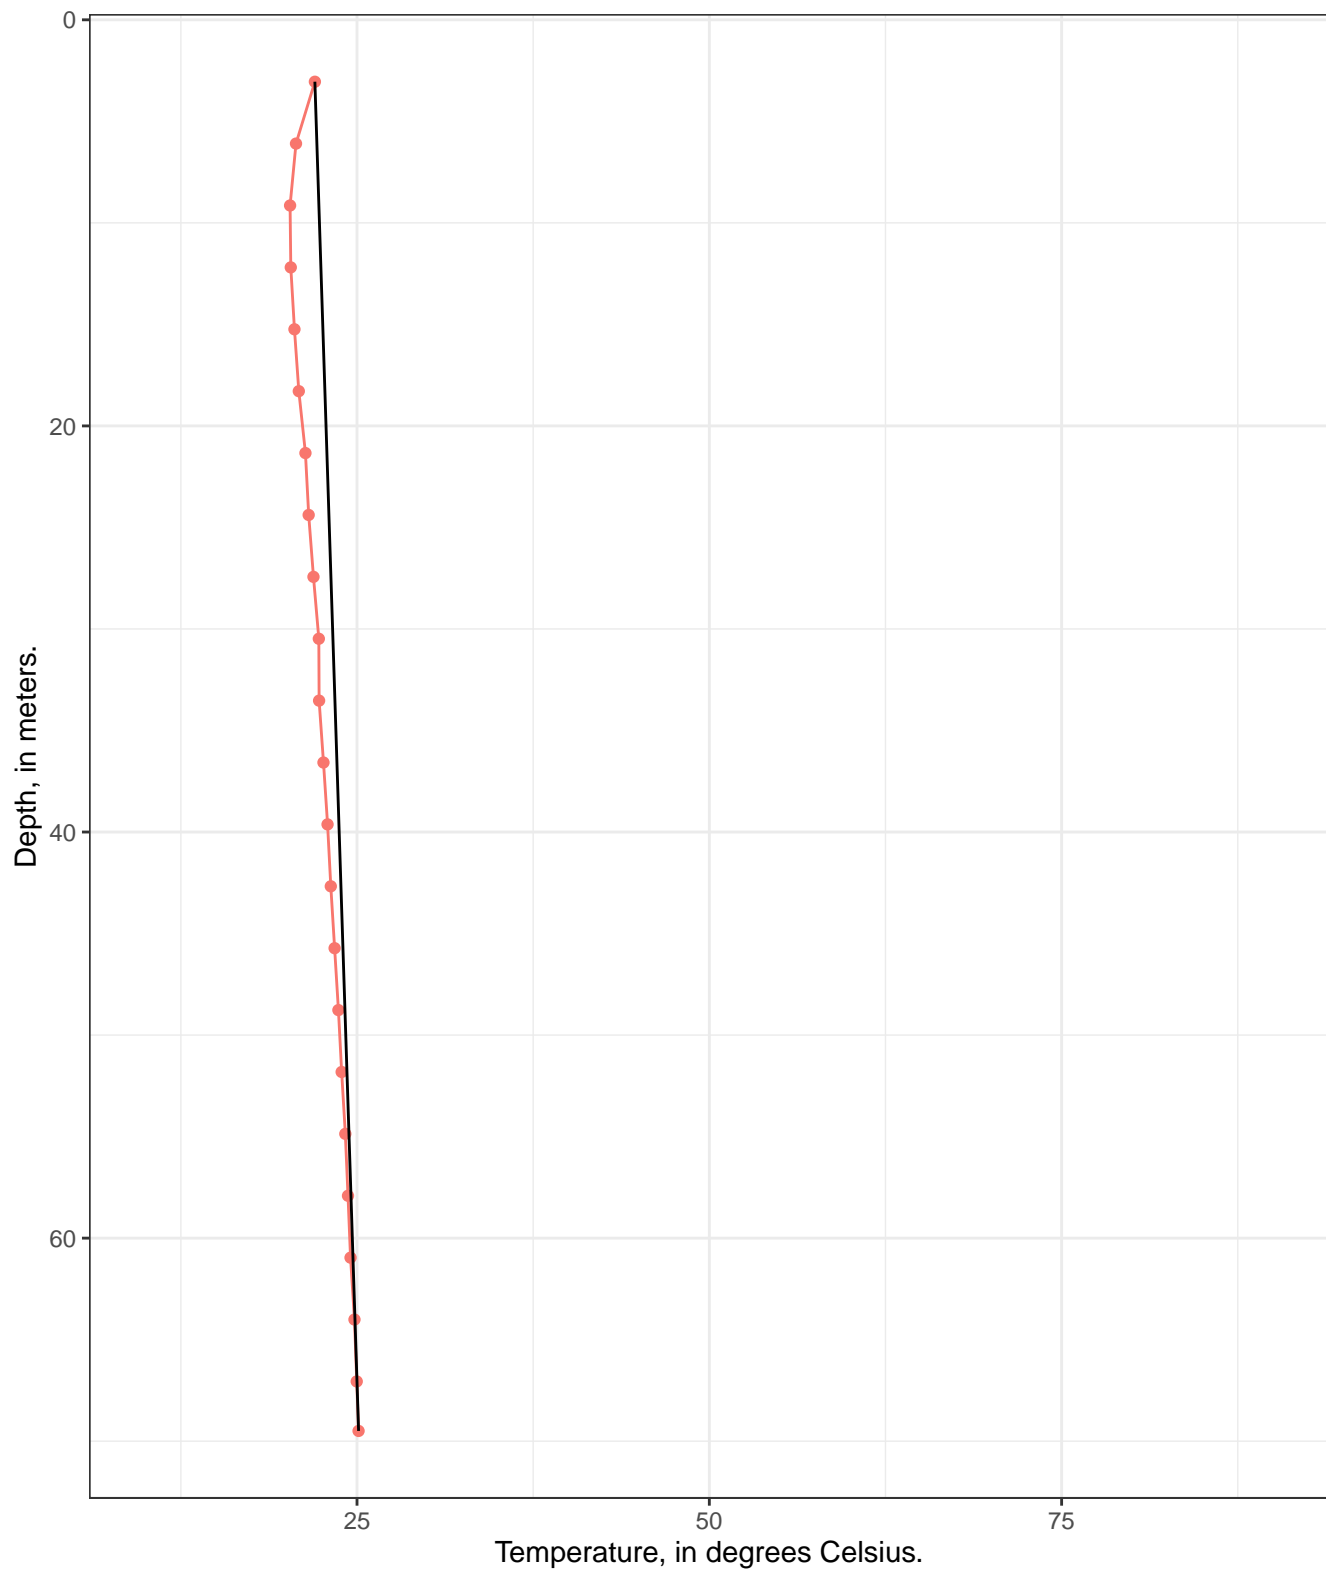

Measurement date 1977-09-14

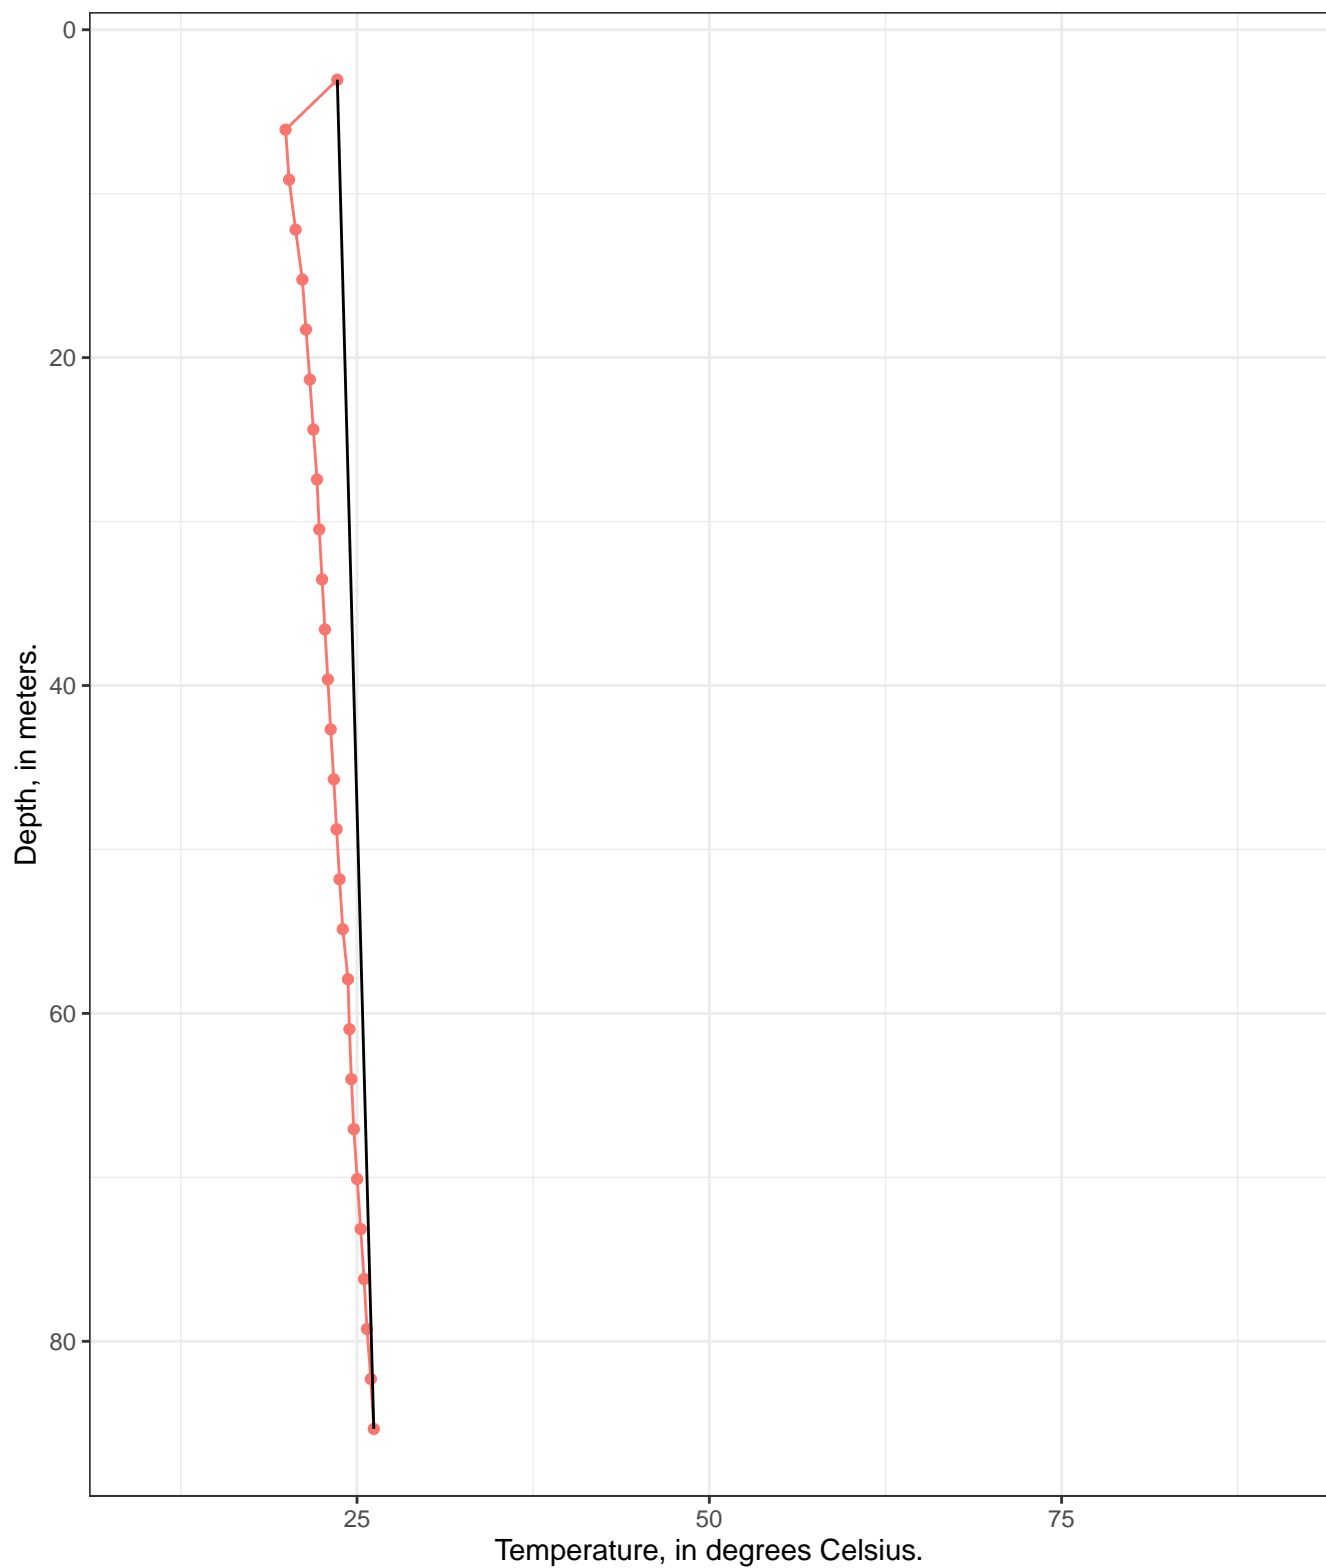



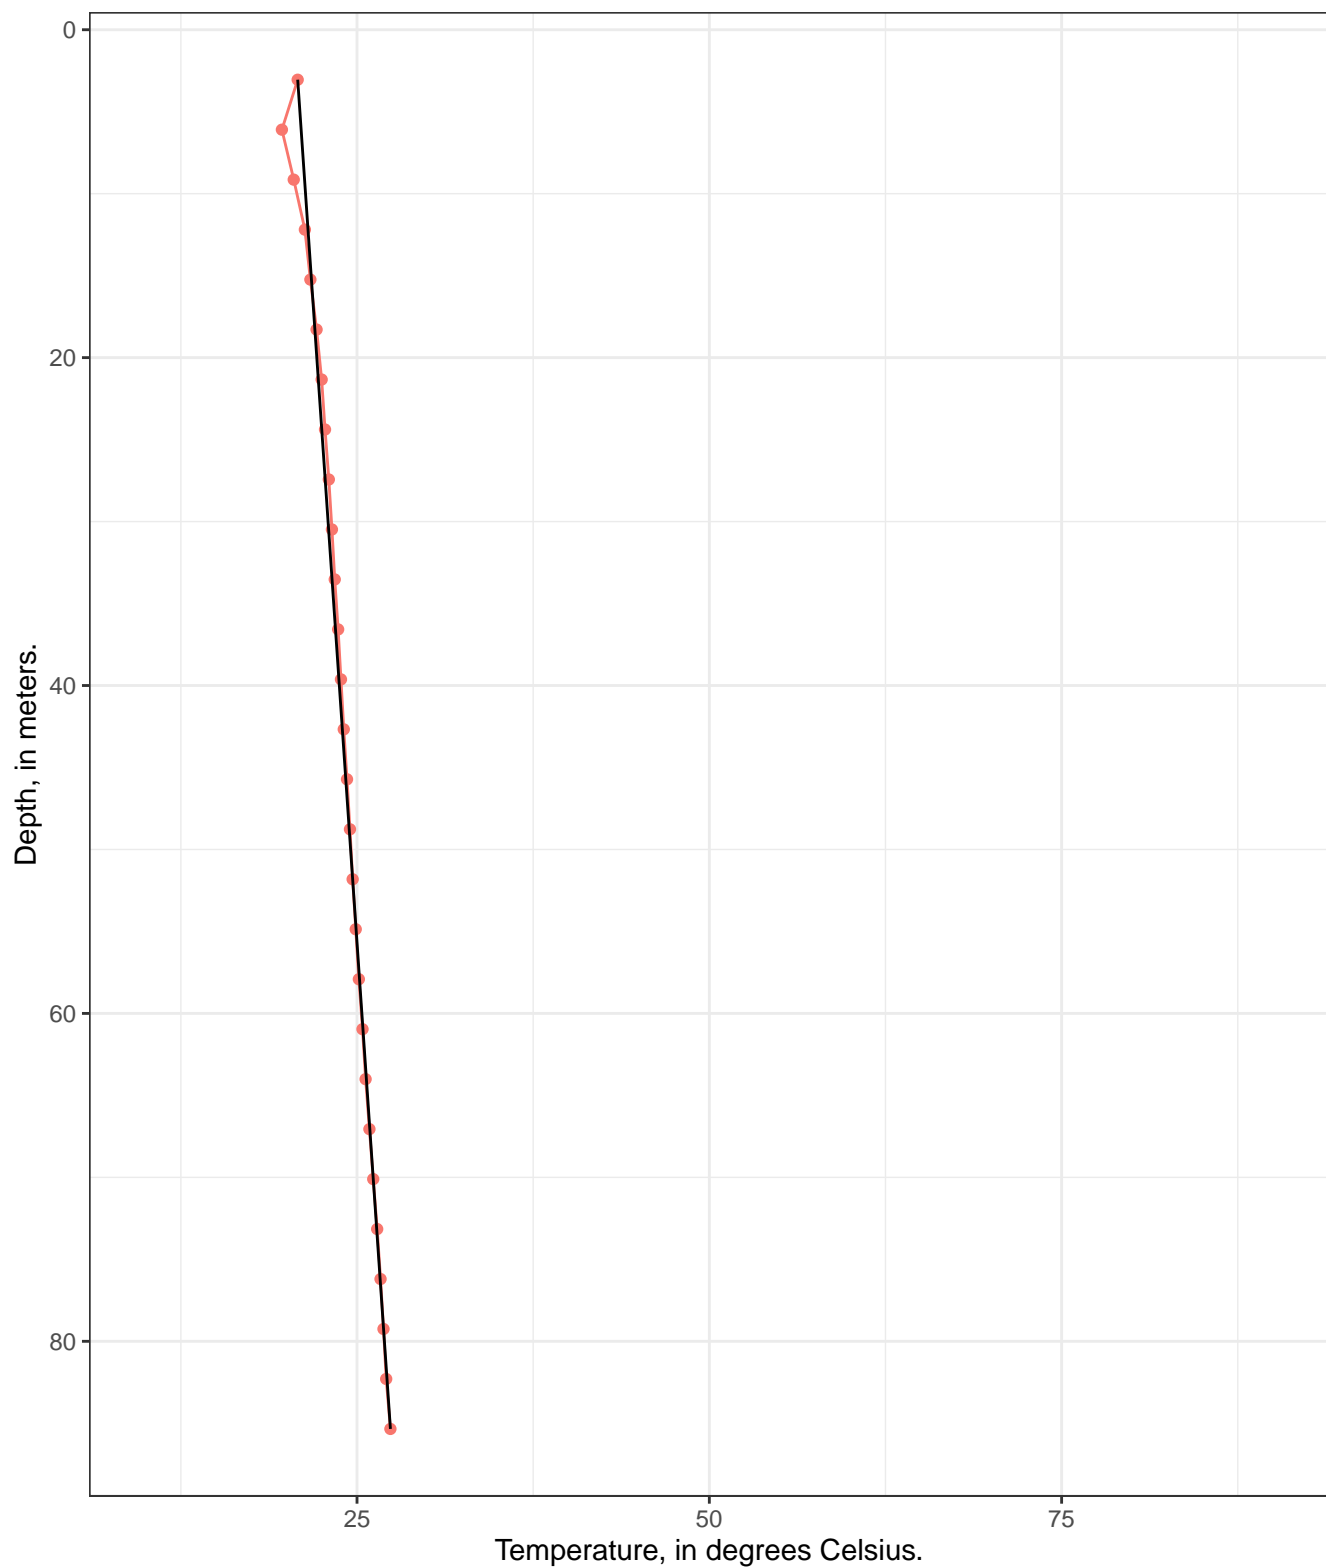

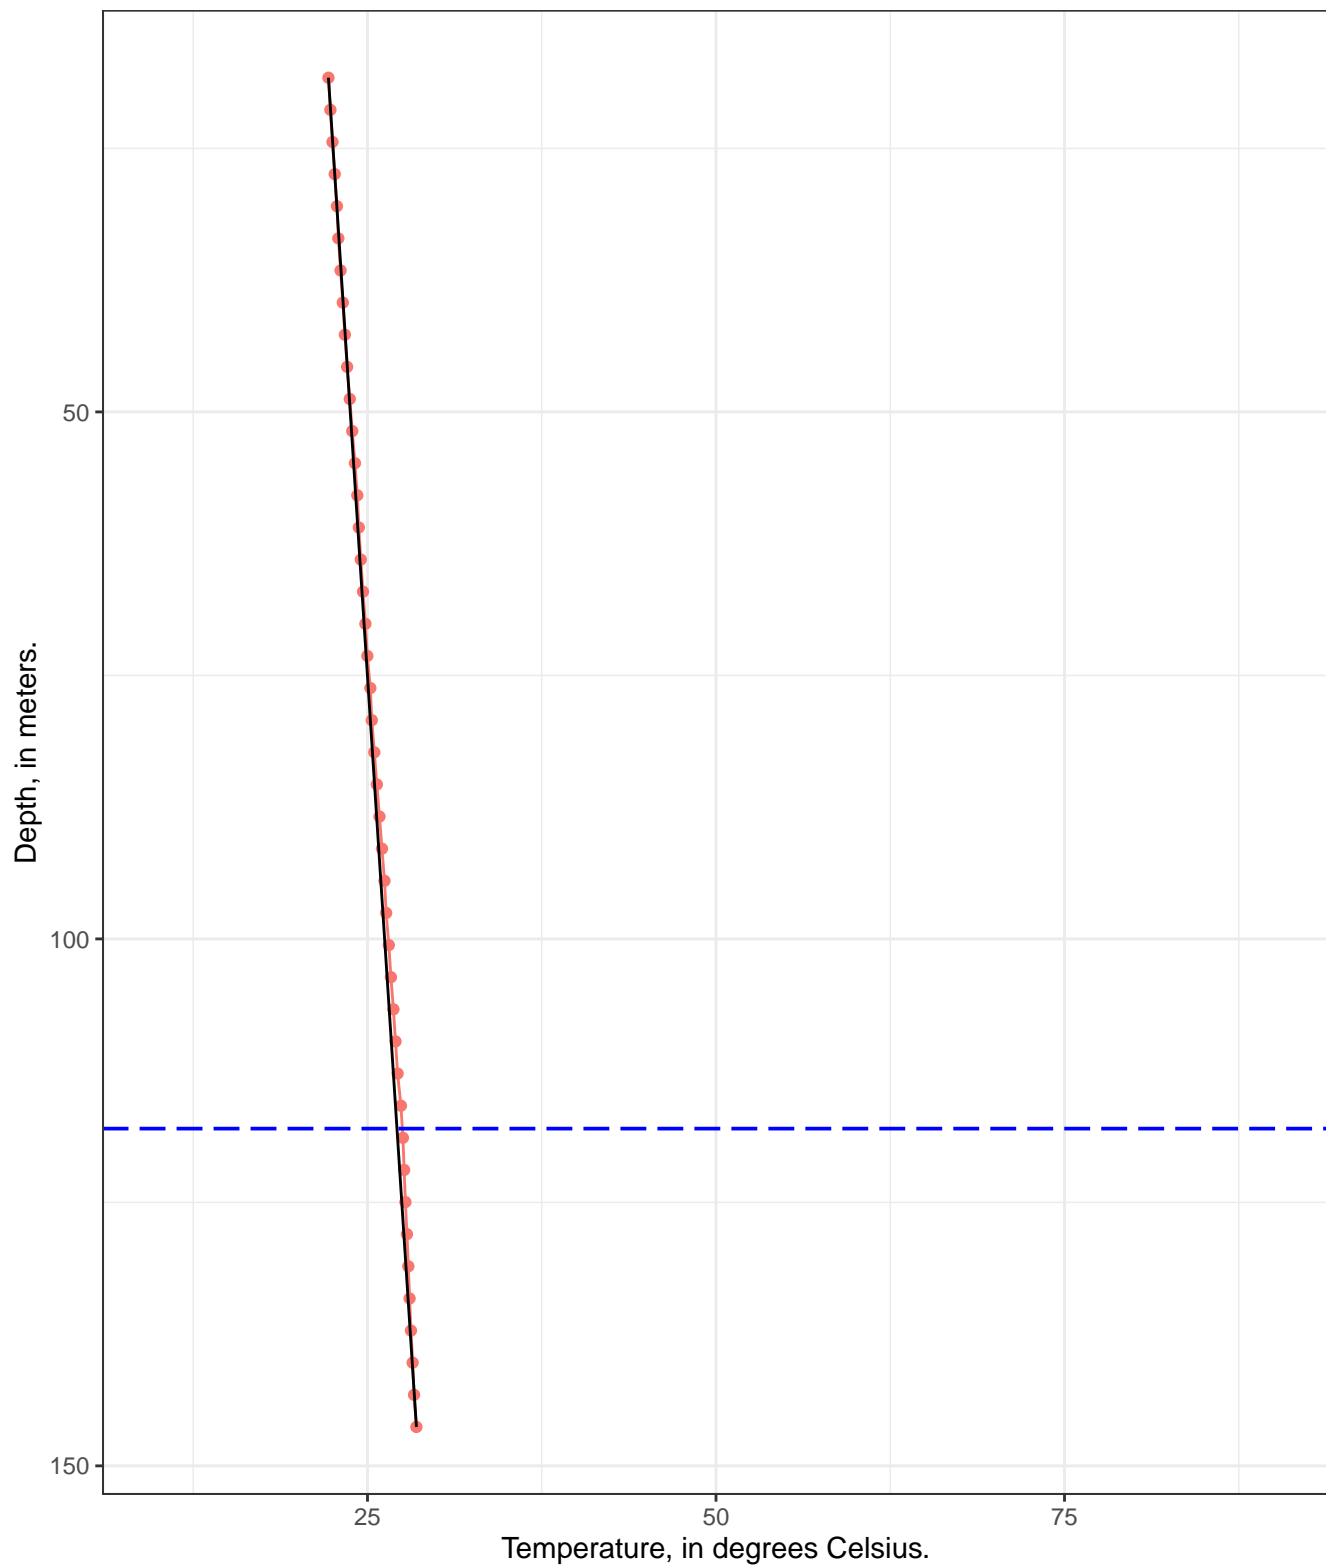

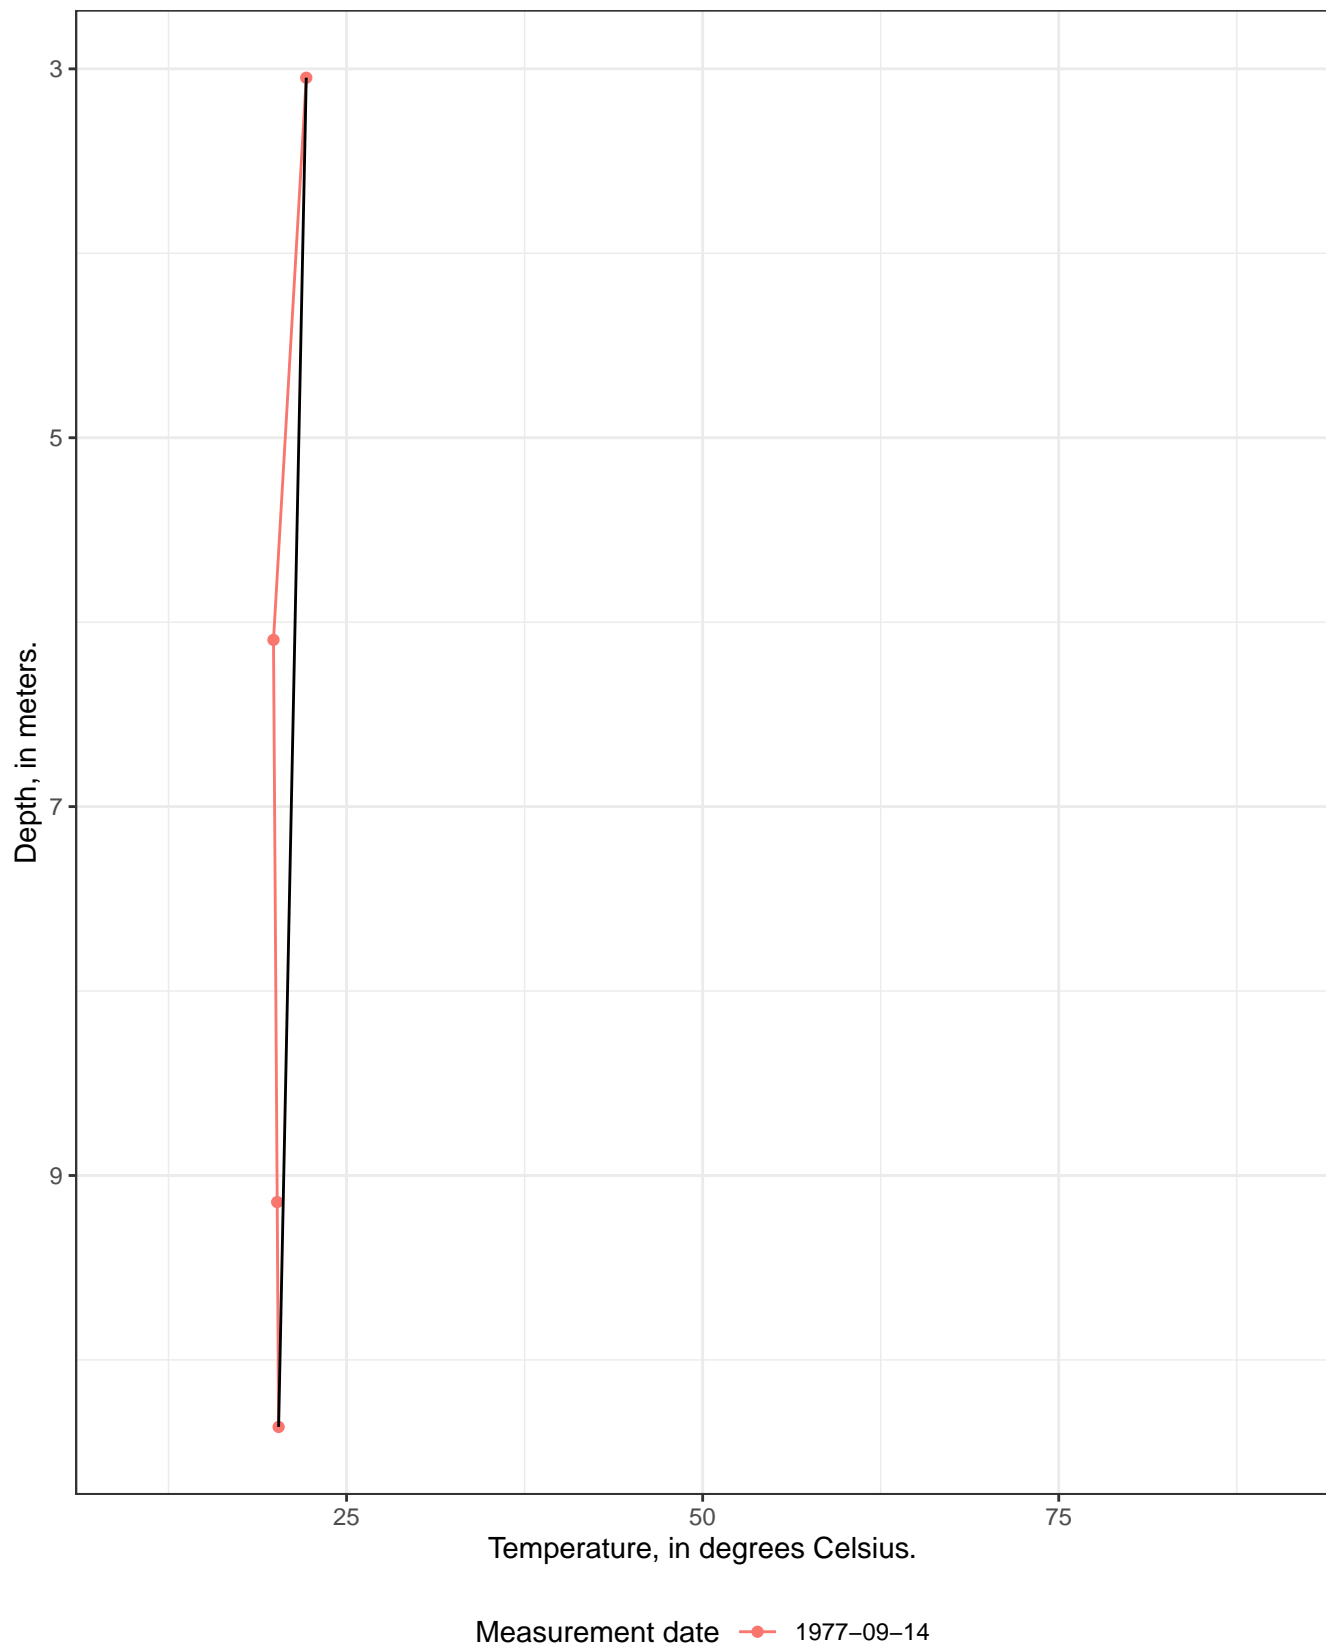

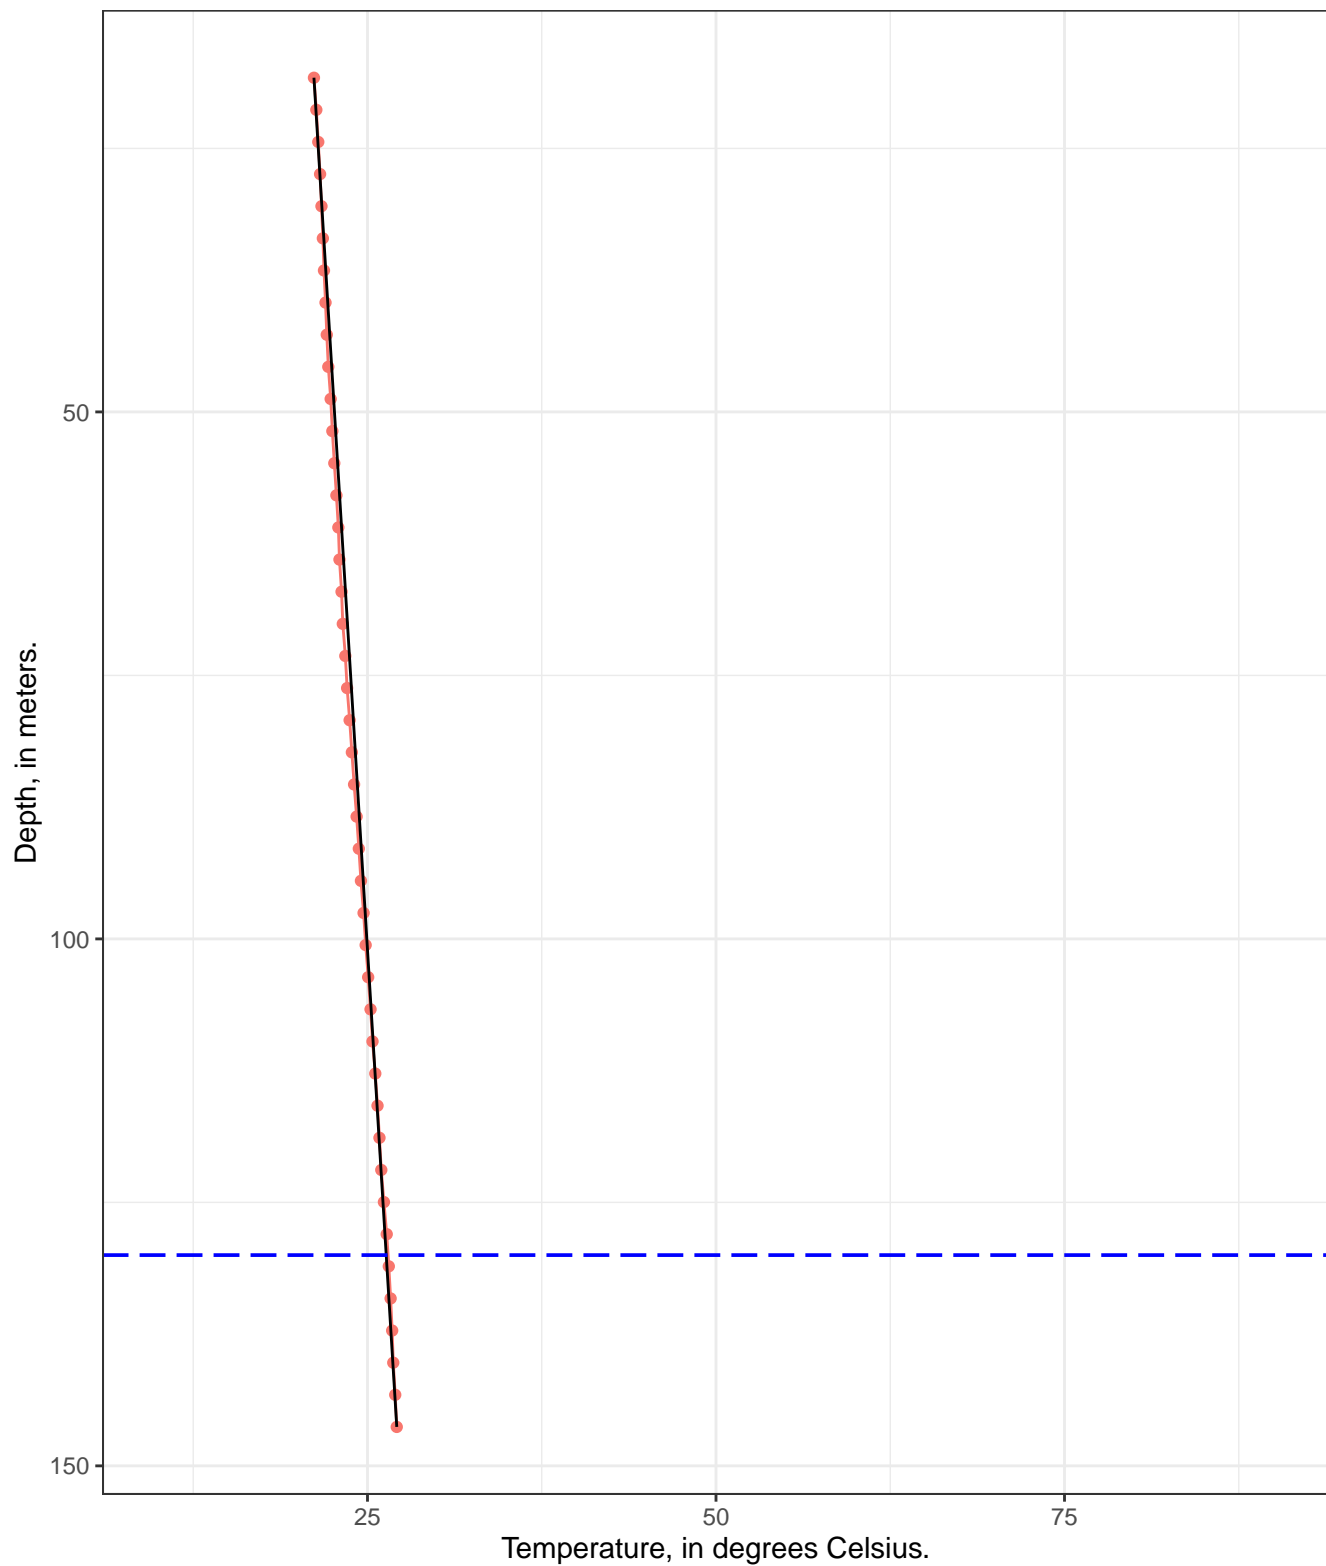

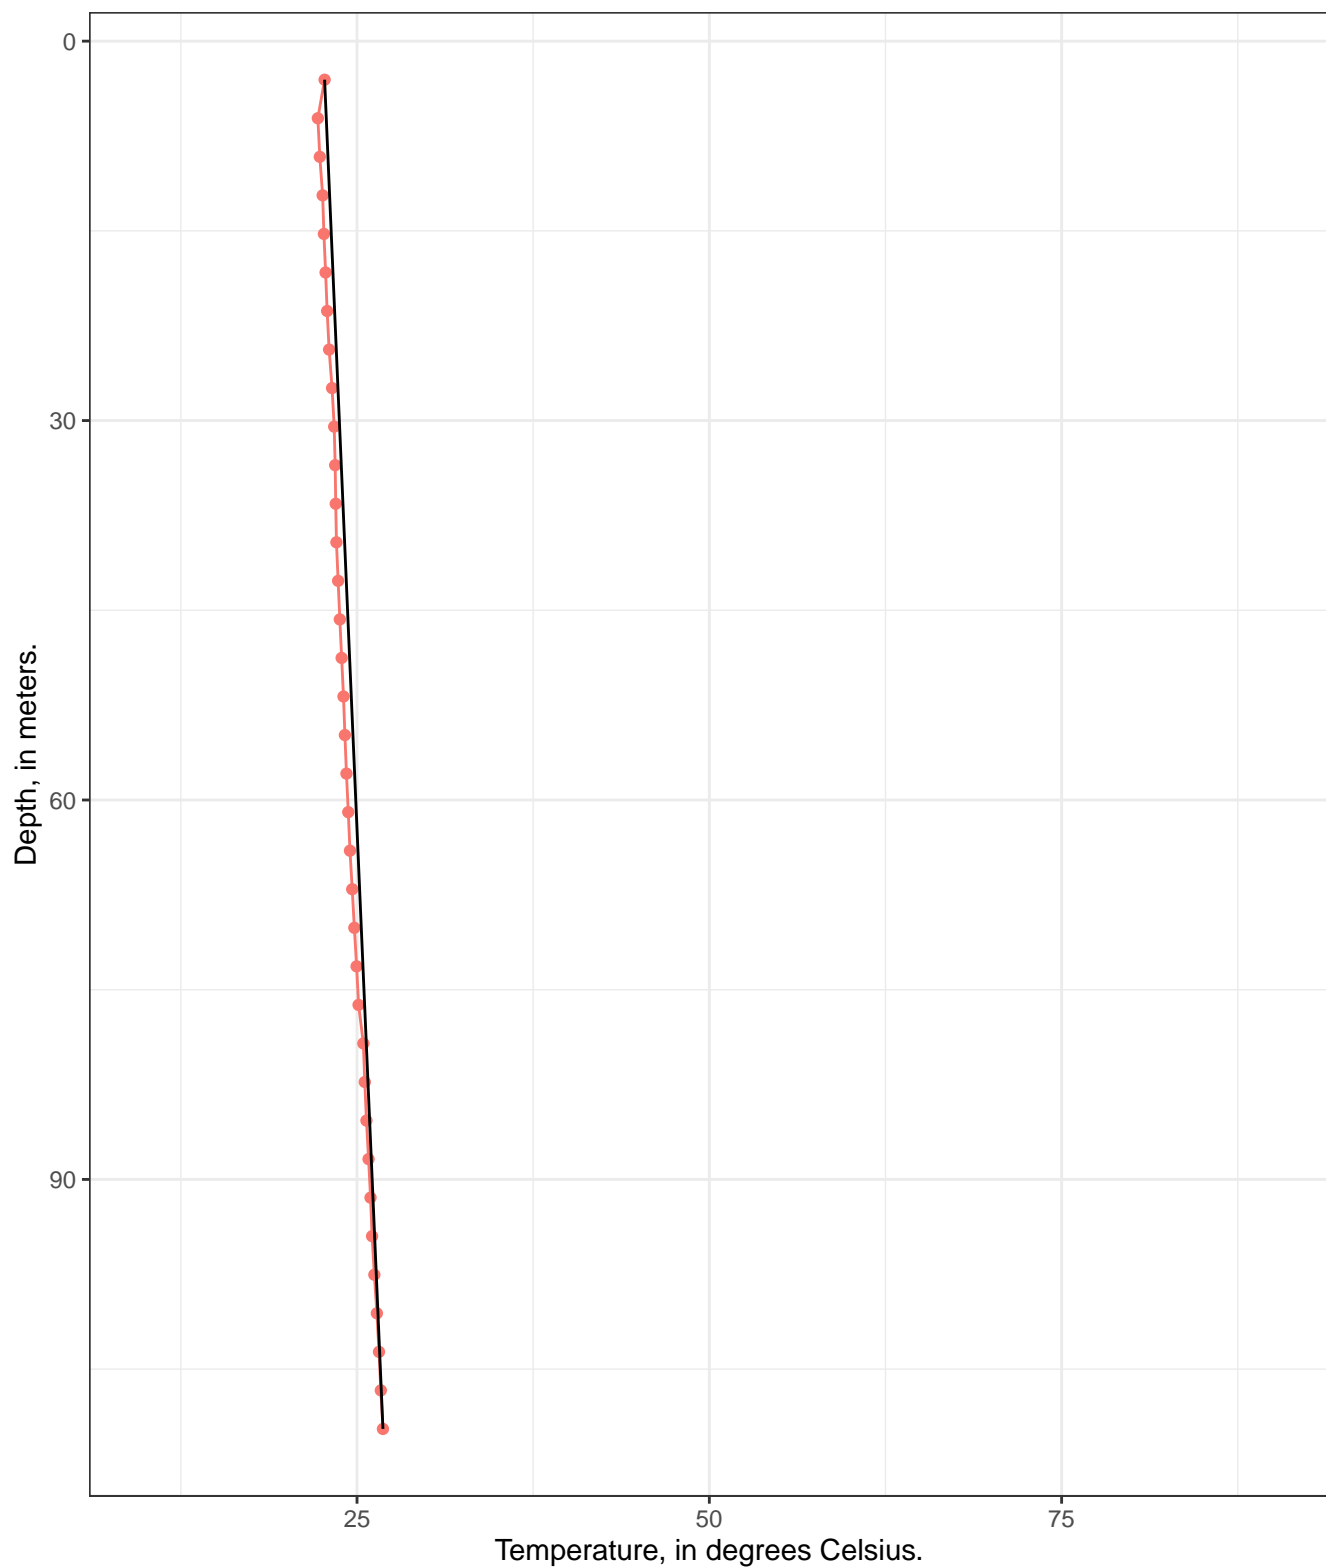

ID: 109 [H-22-76-2\_KILBOURNE\_HOLE]

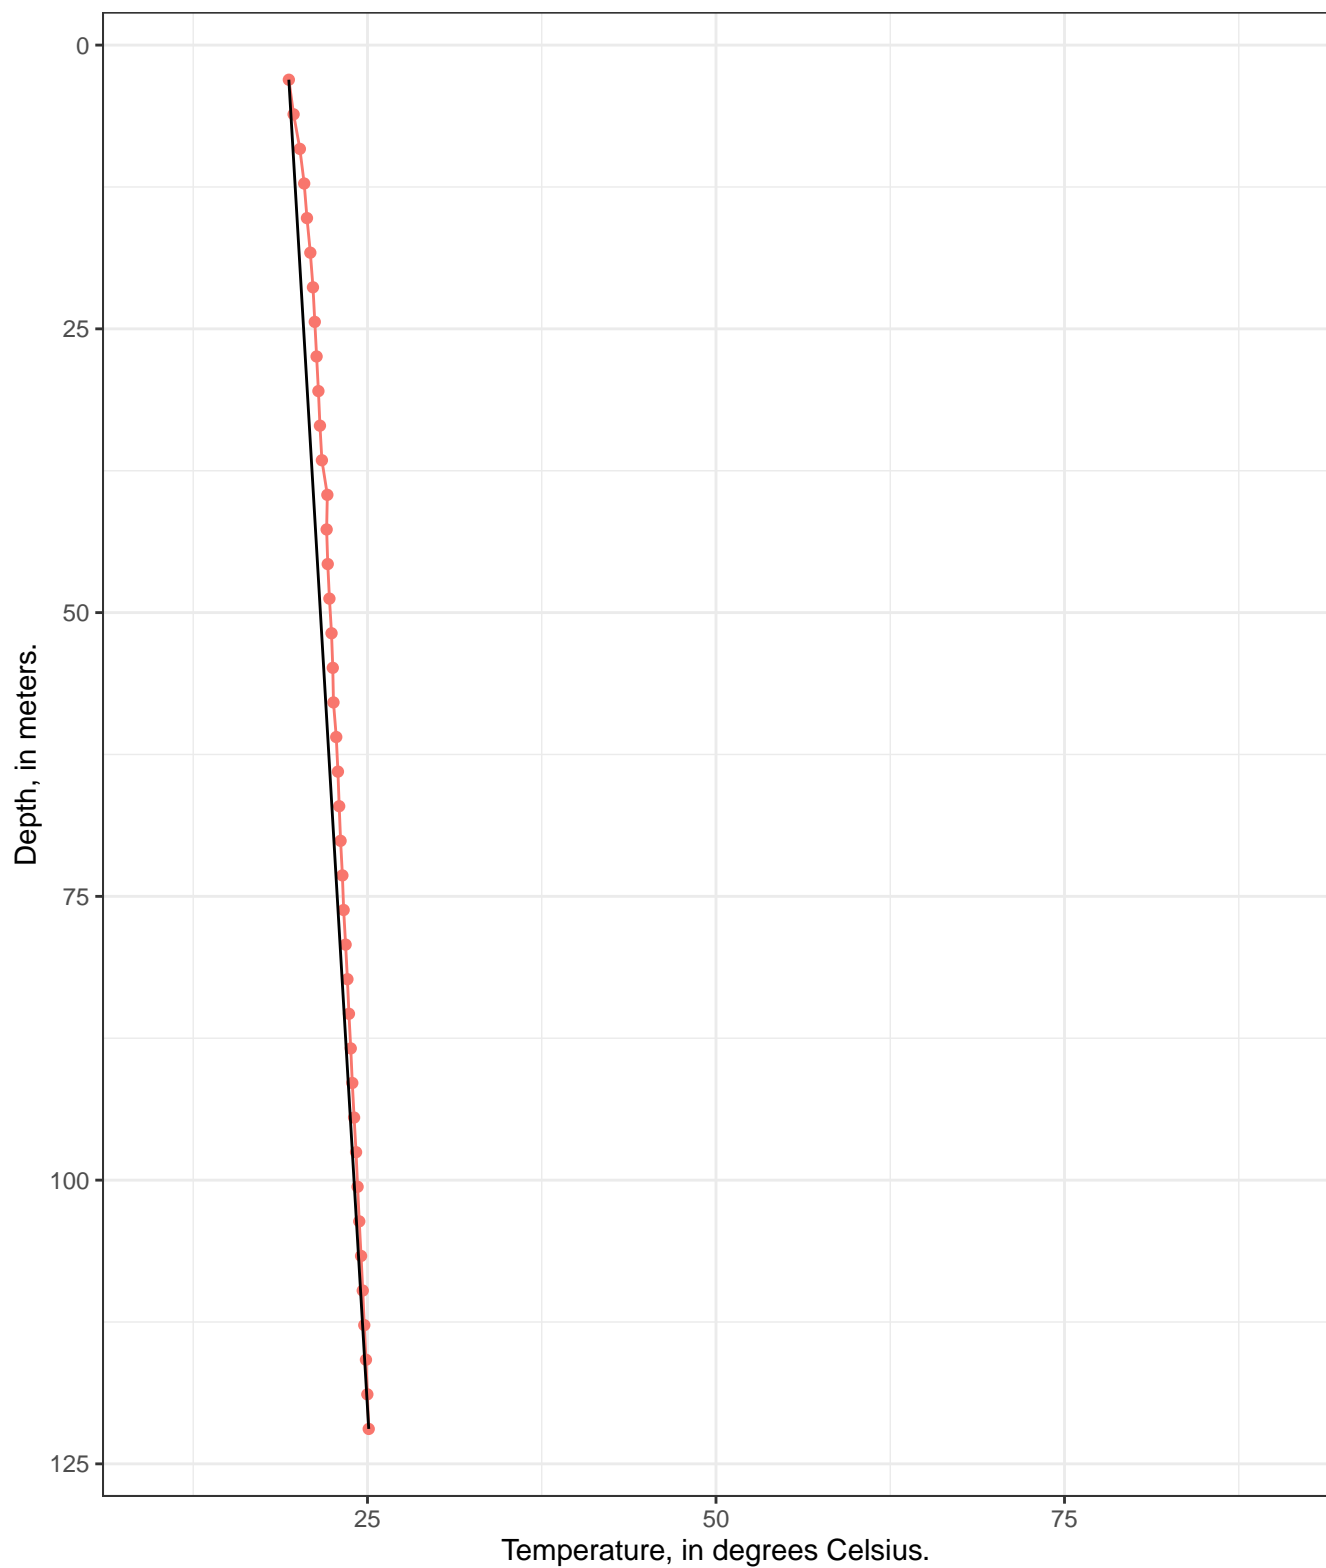

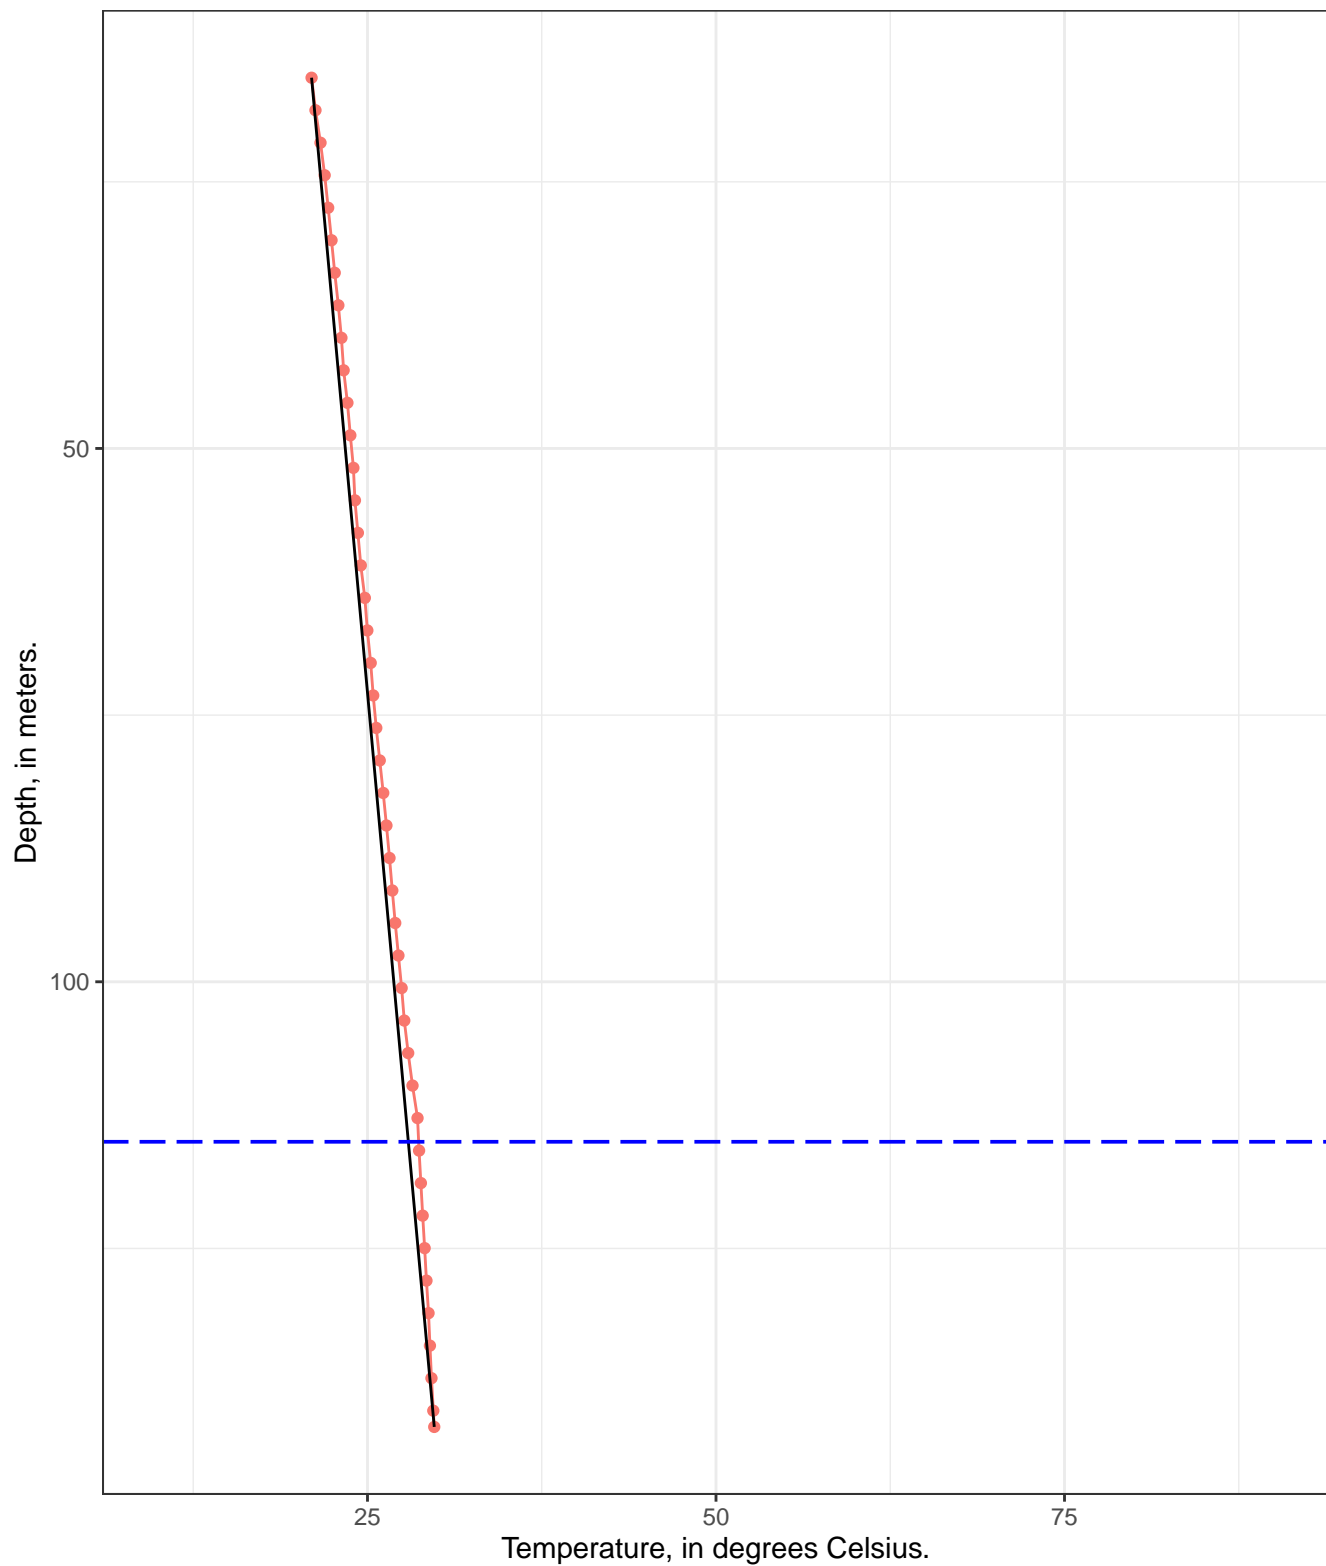

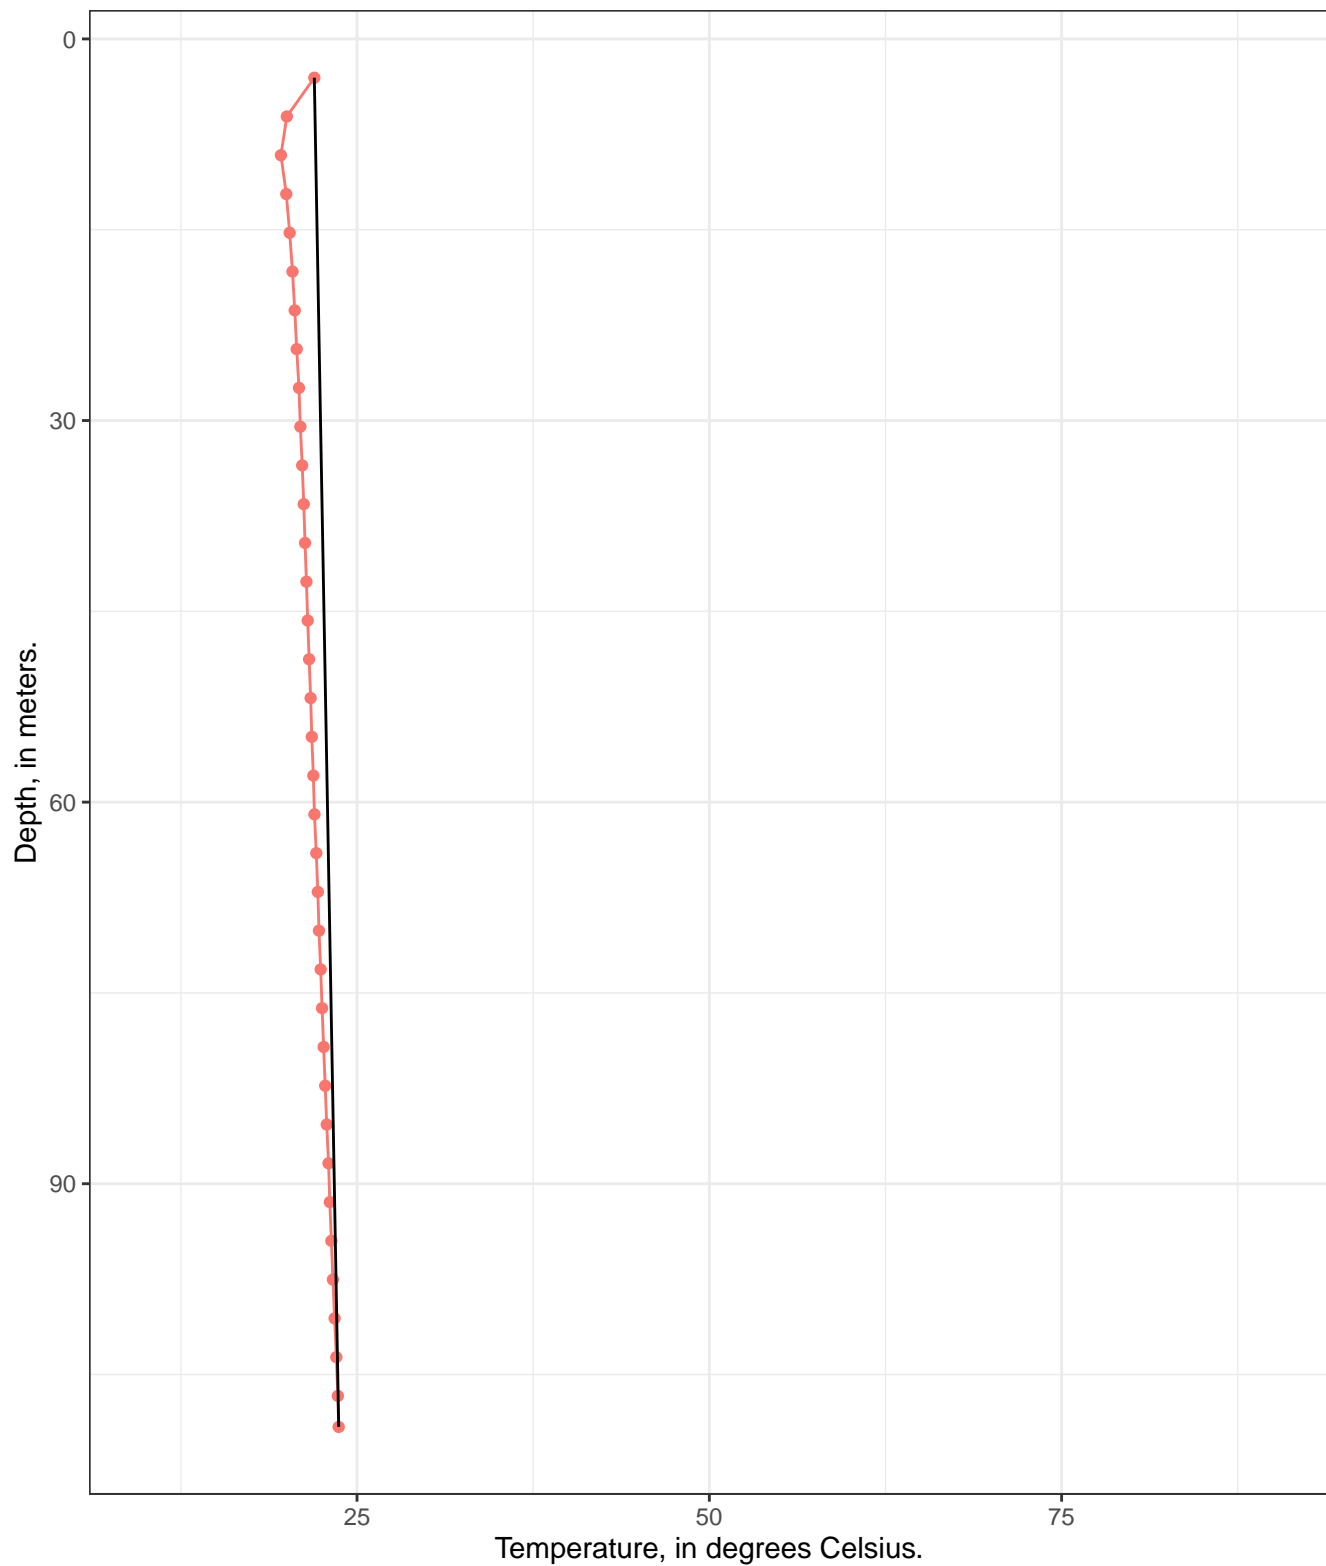



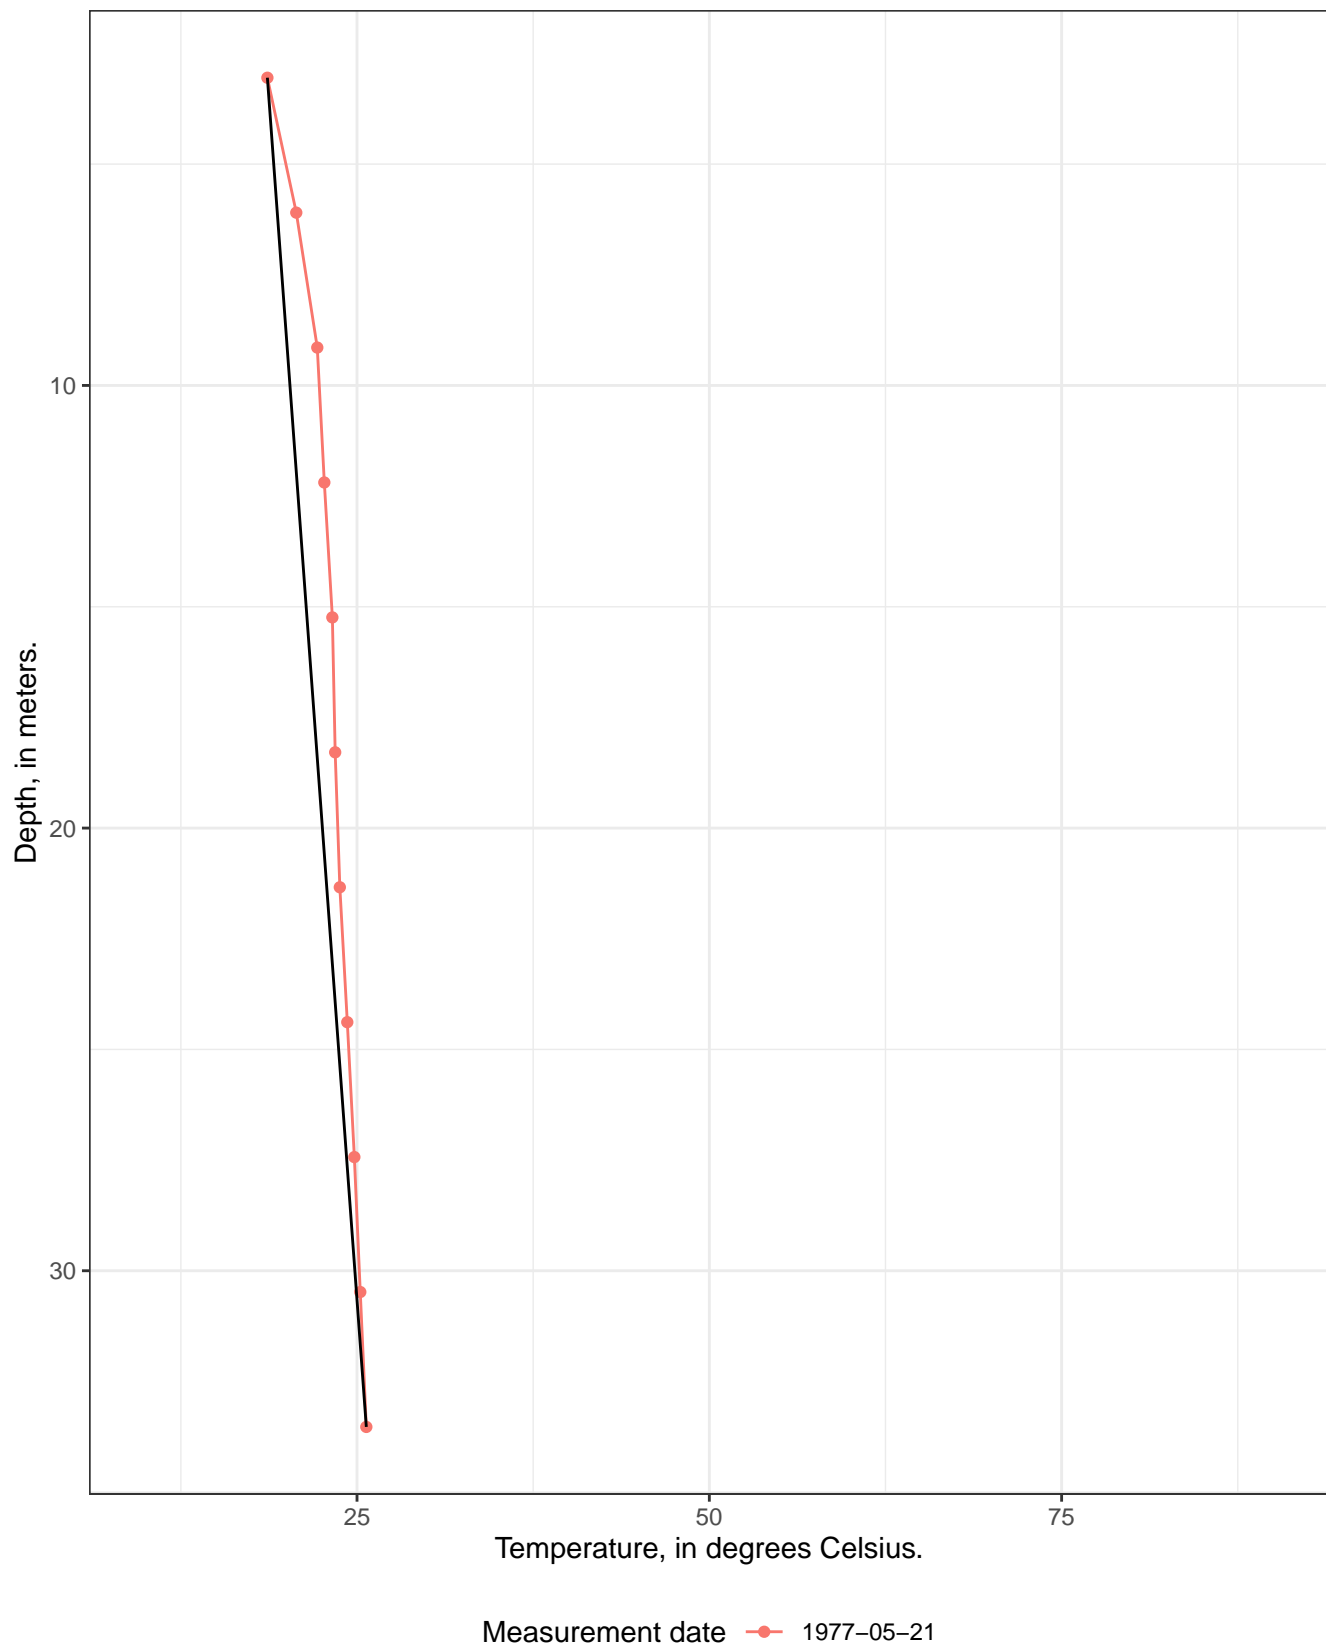

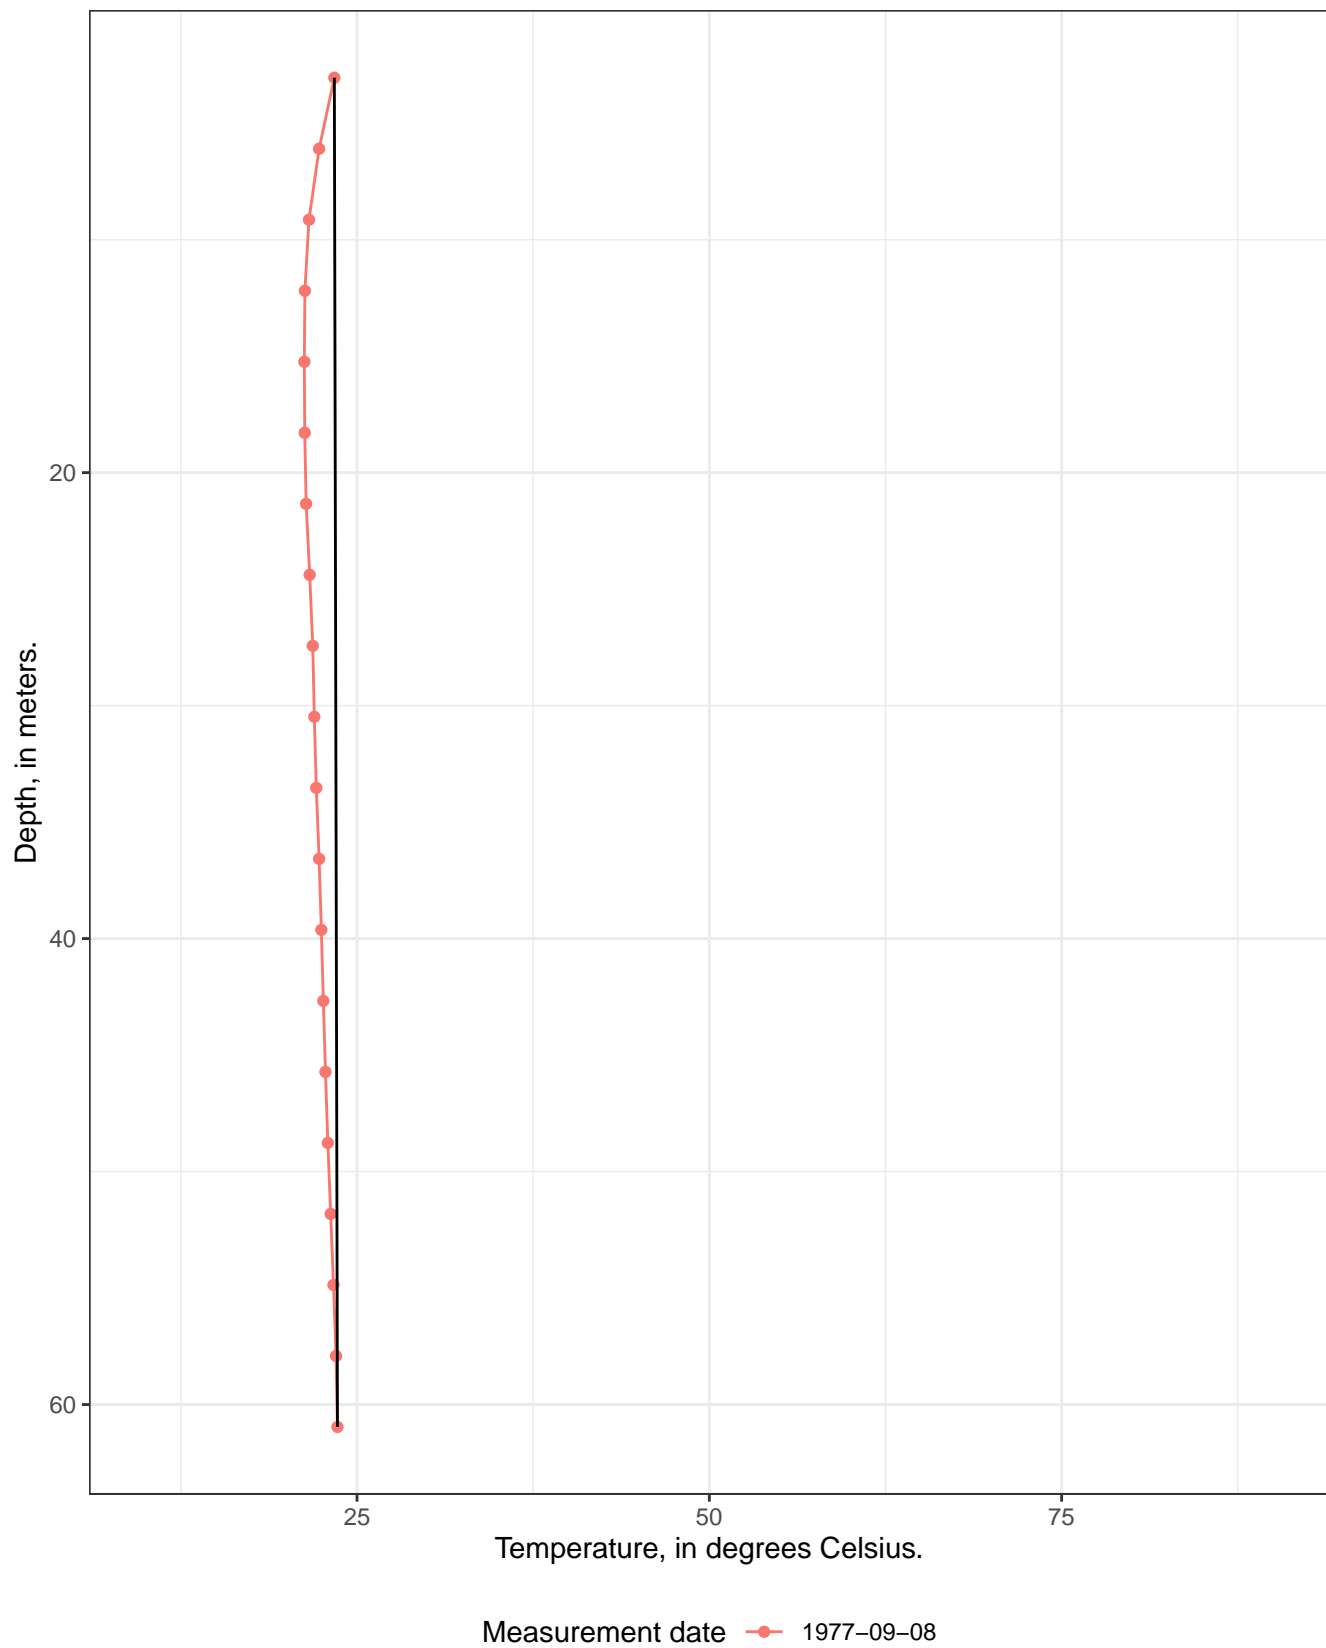

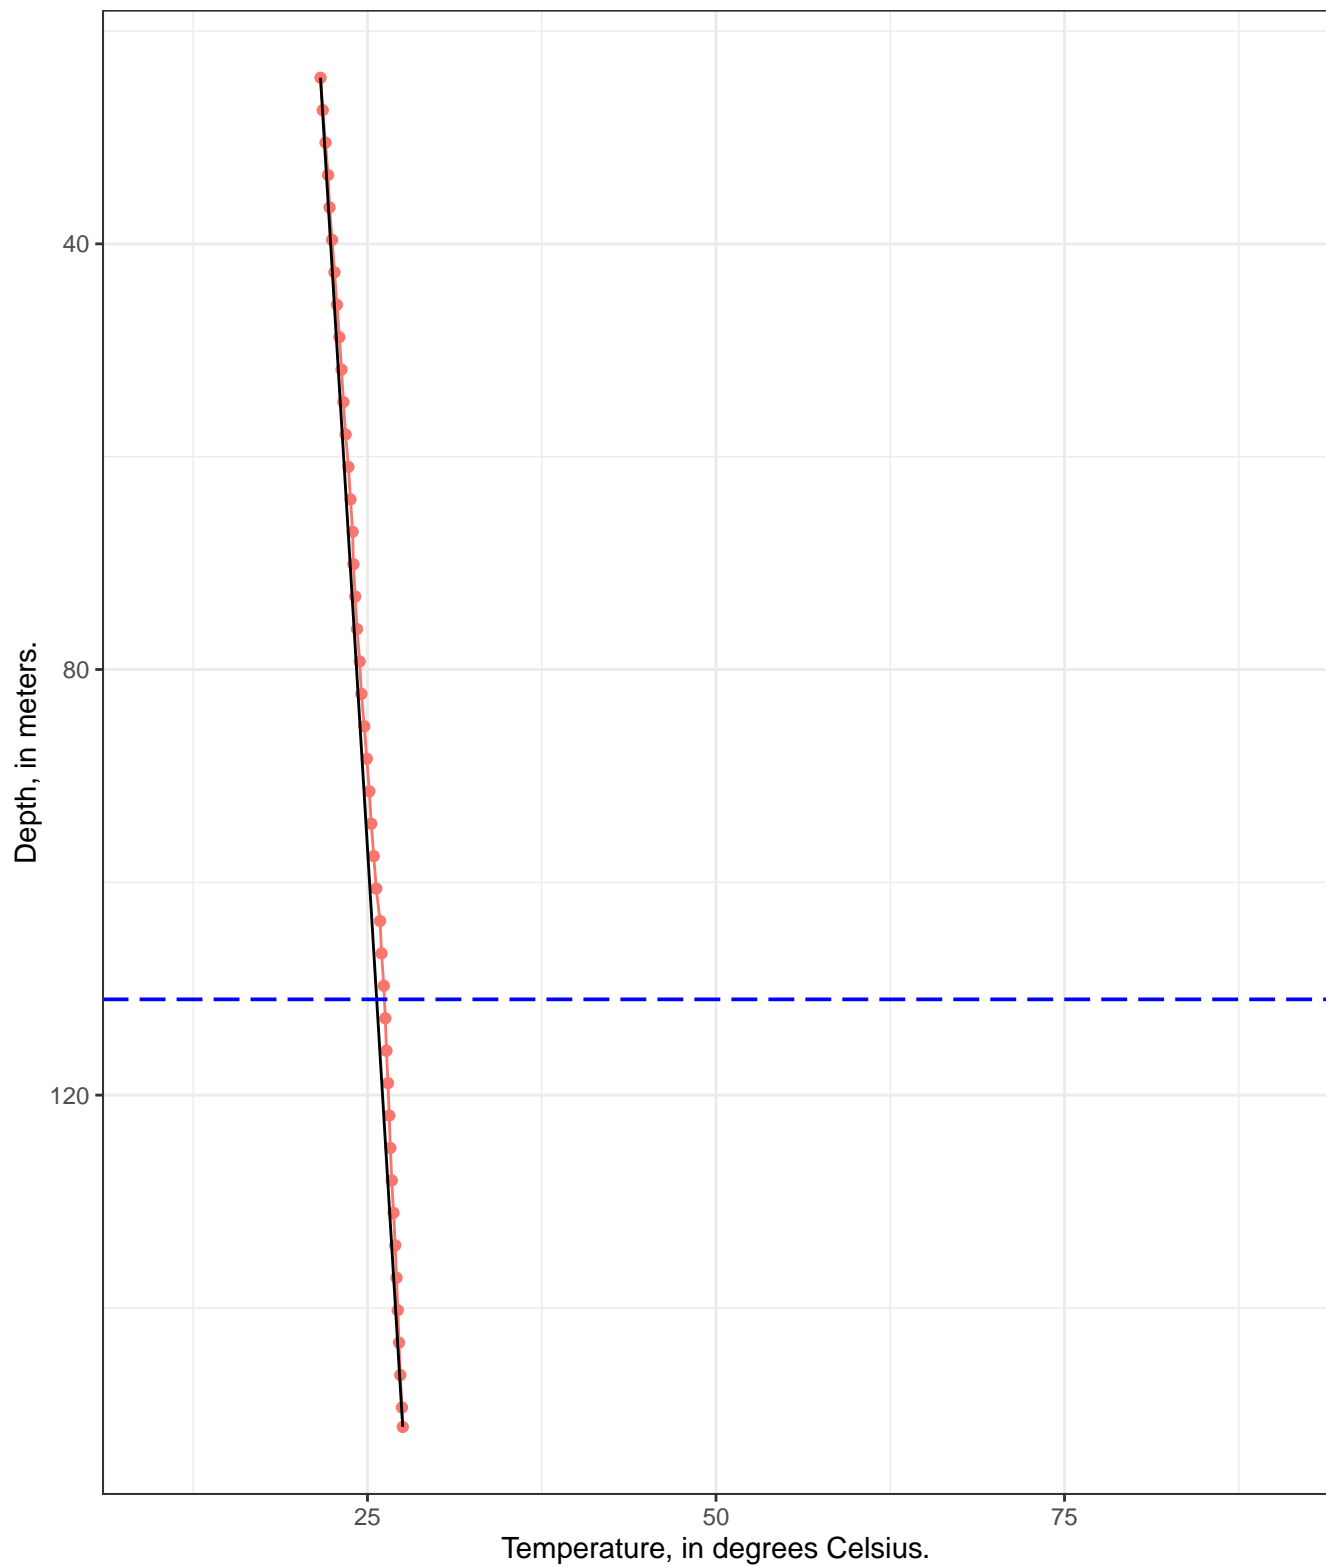

ID: 115 [H-22-76-27\_KILBOURNE\_HOLE]

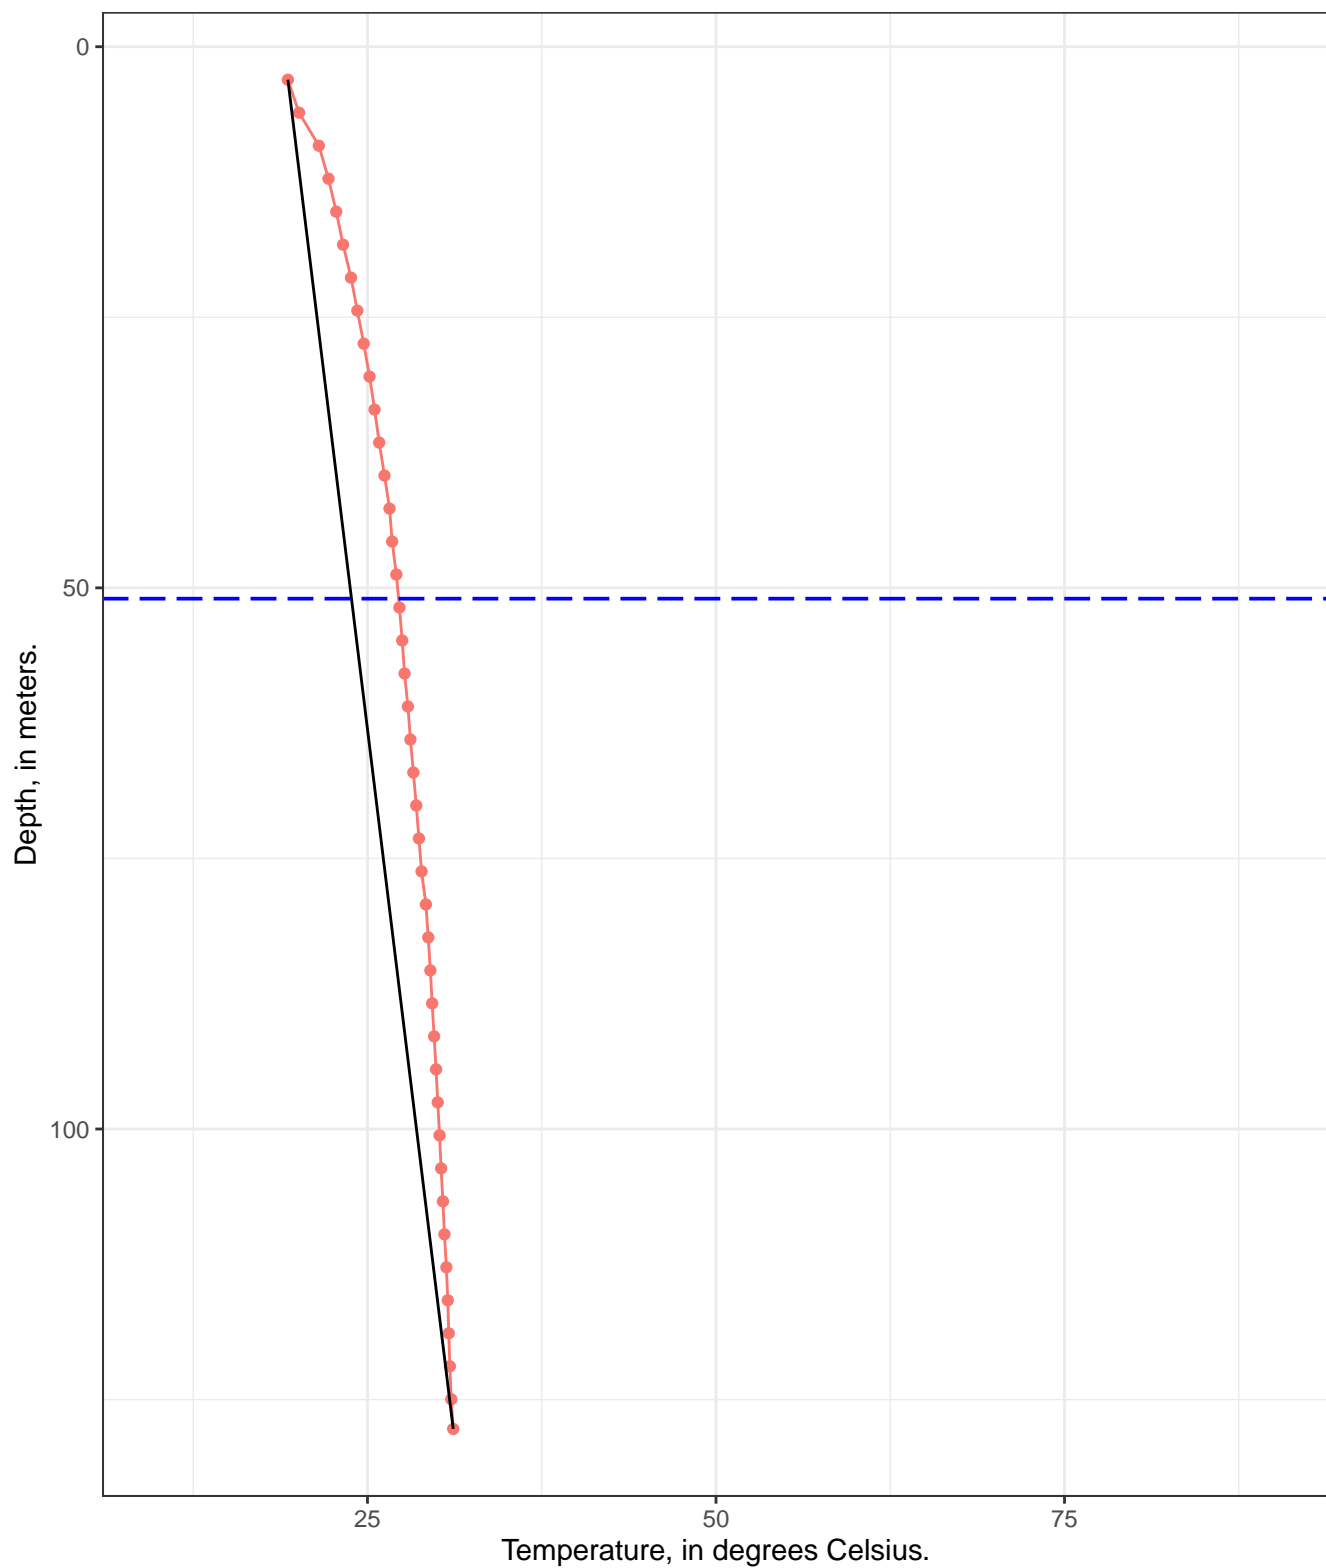

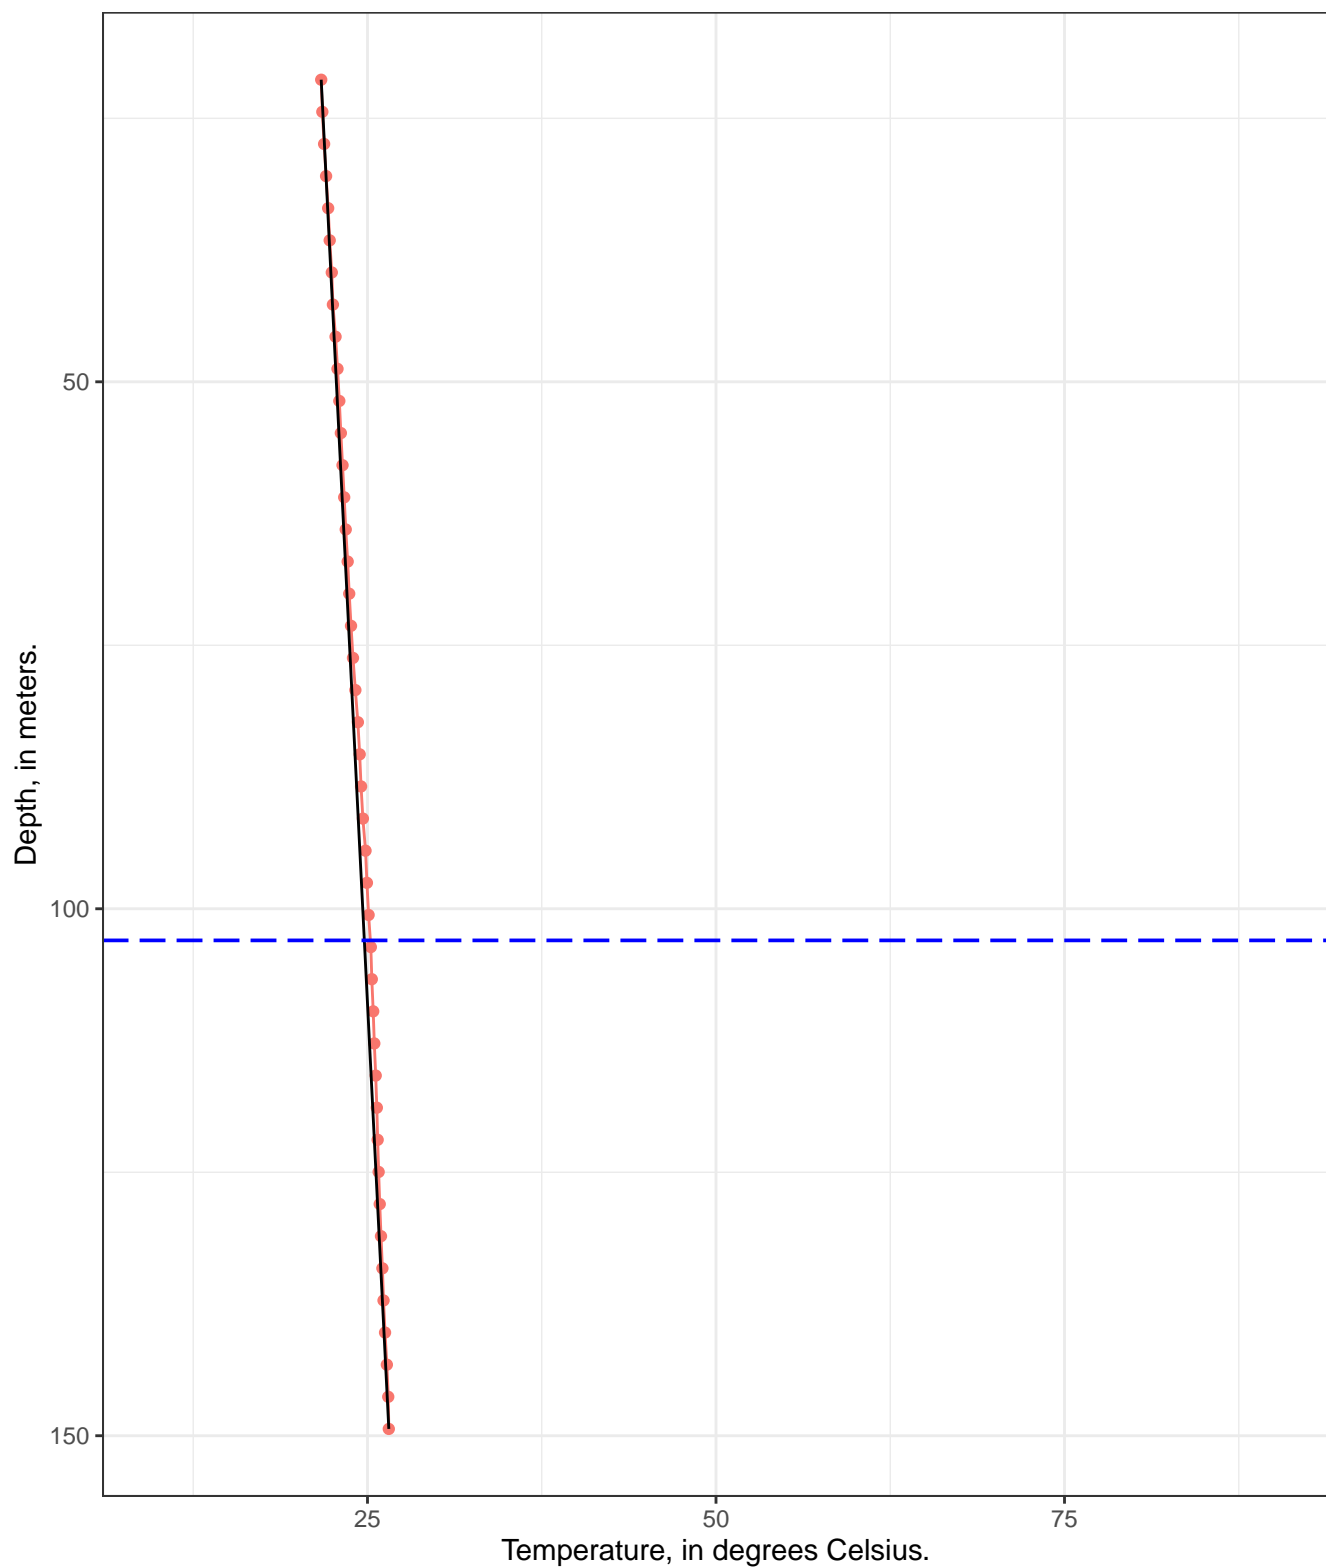

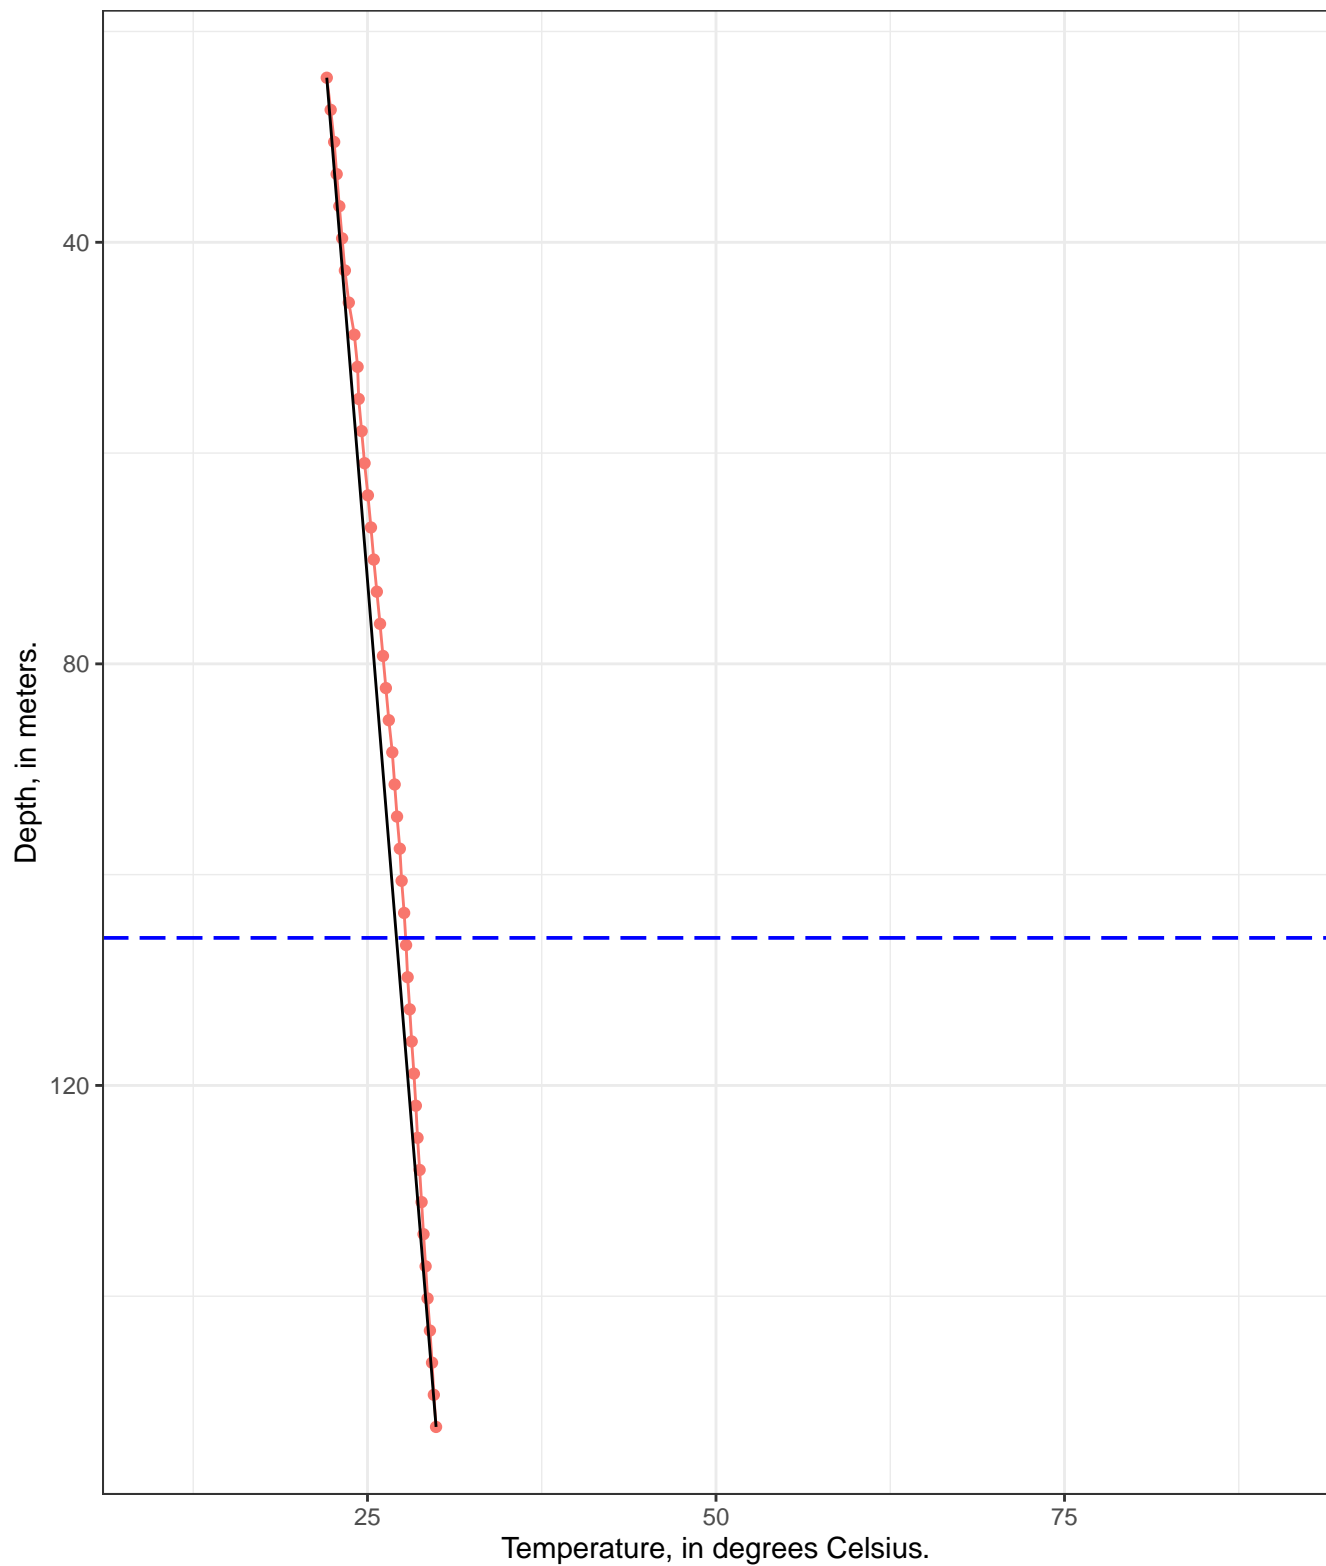

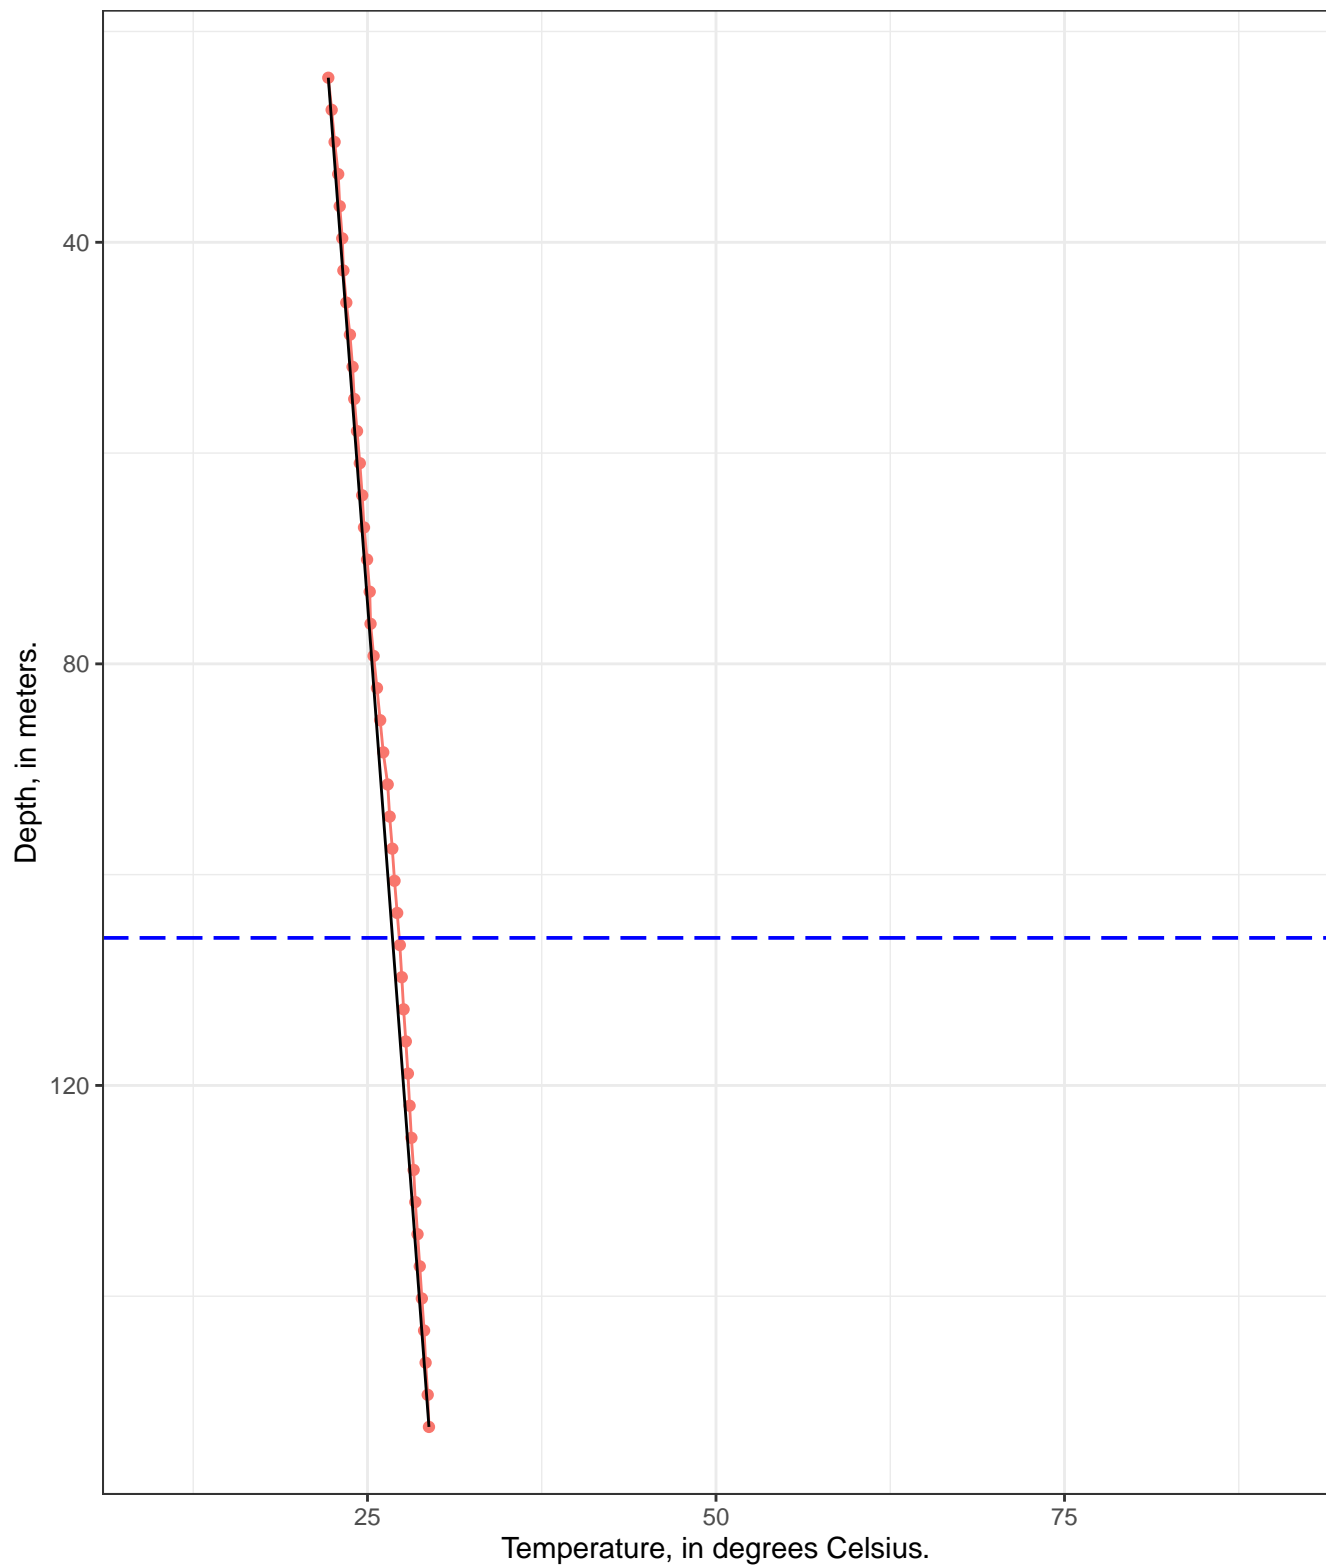

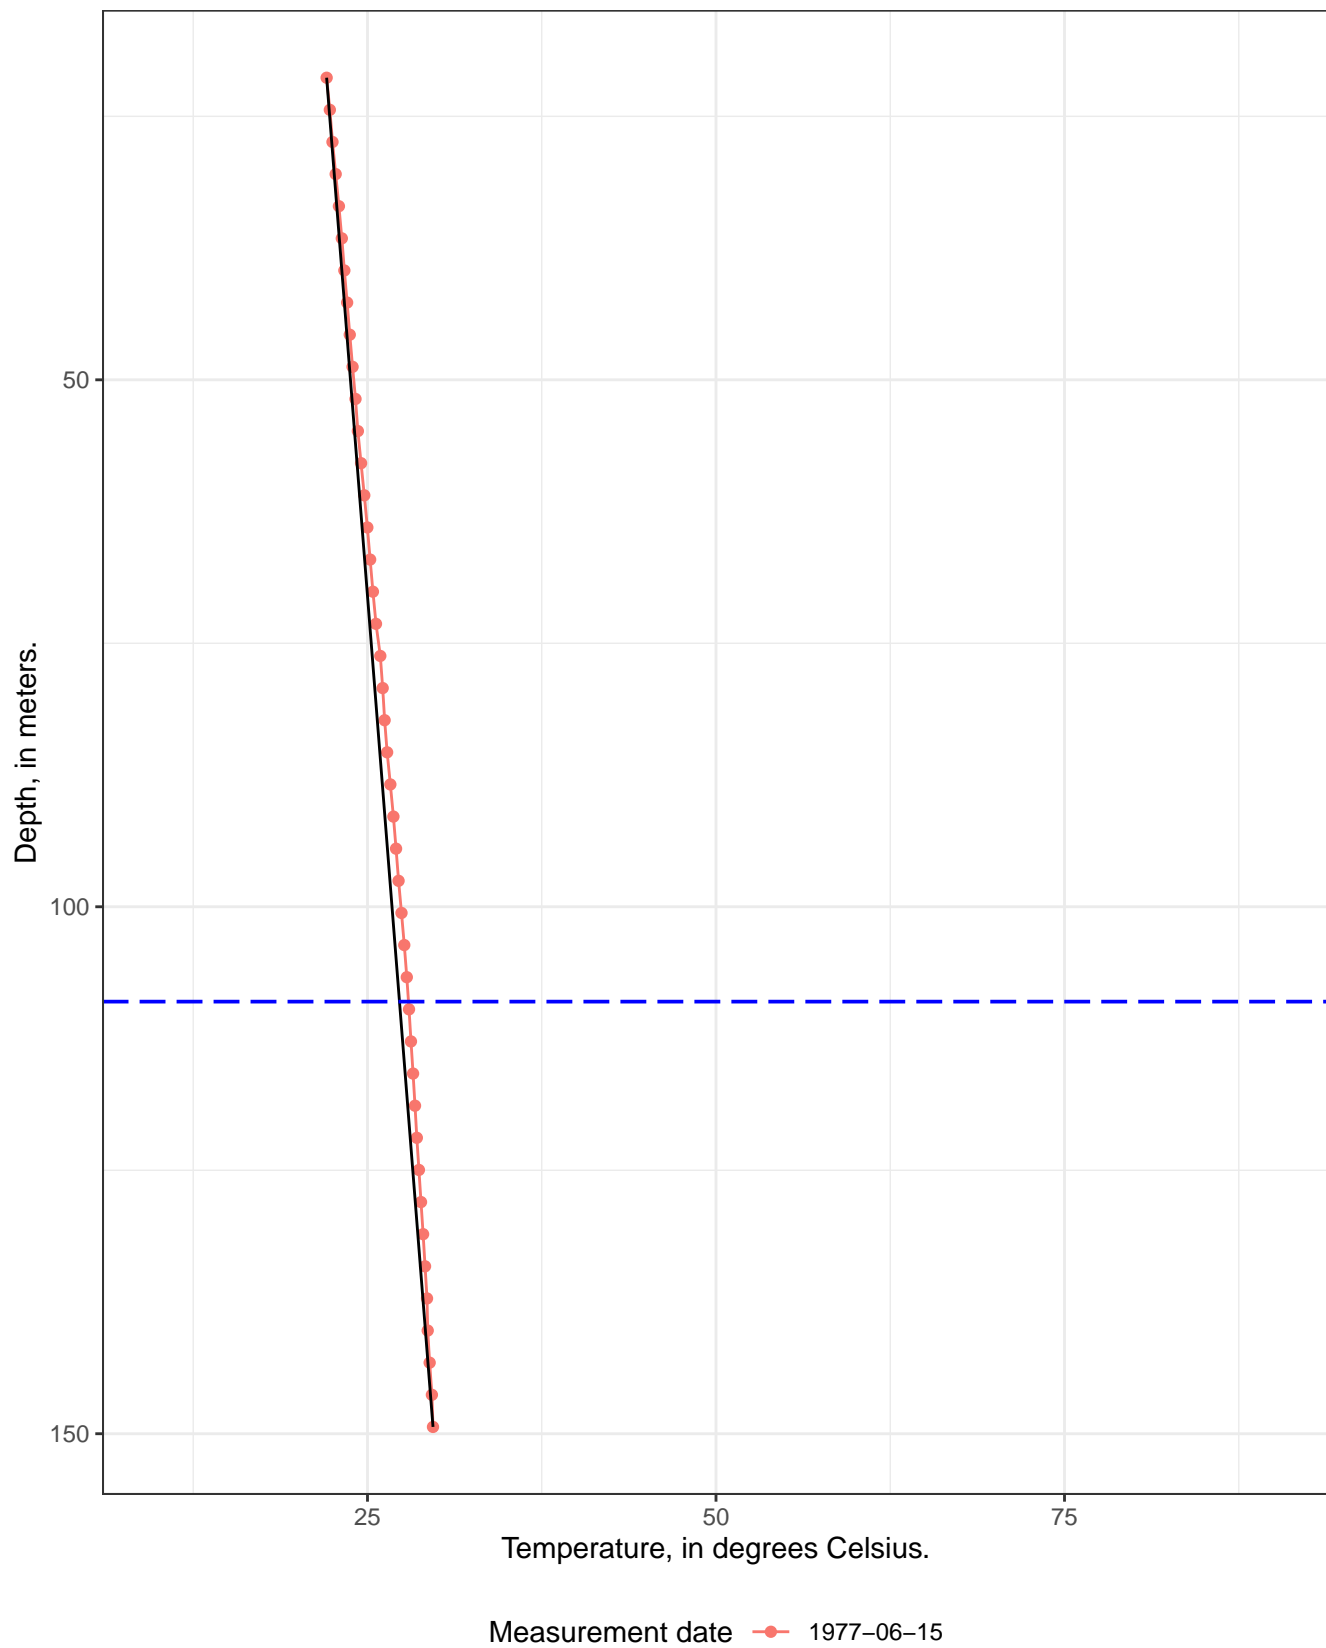



ID: 120 [H-22-76-32\_KILBOURNE\_HOLE]

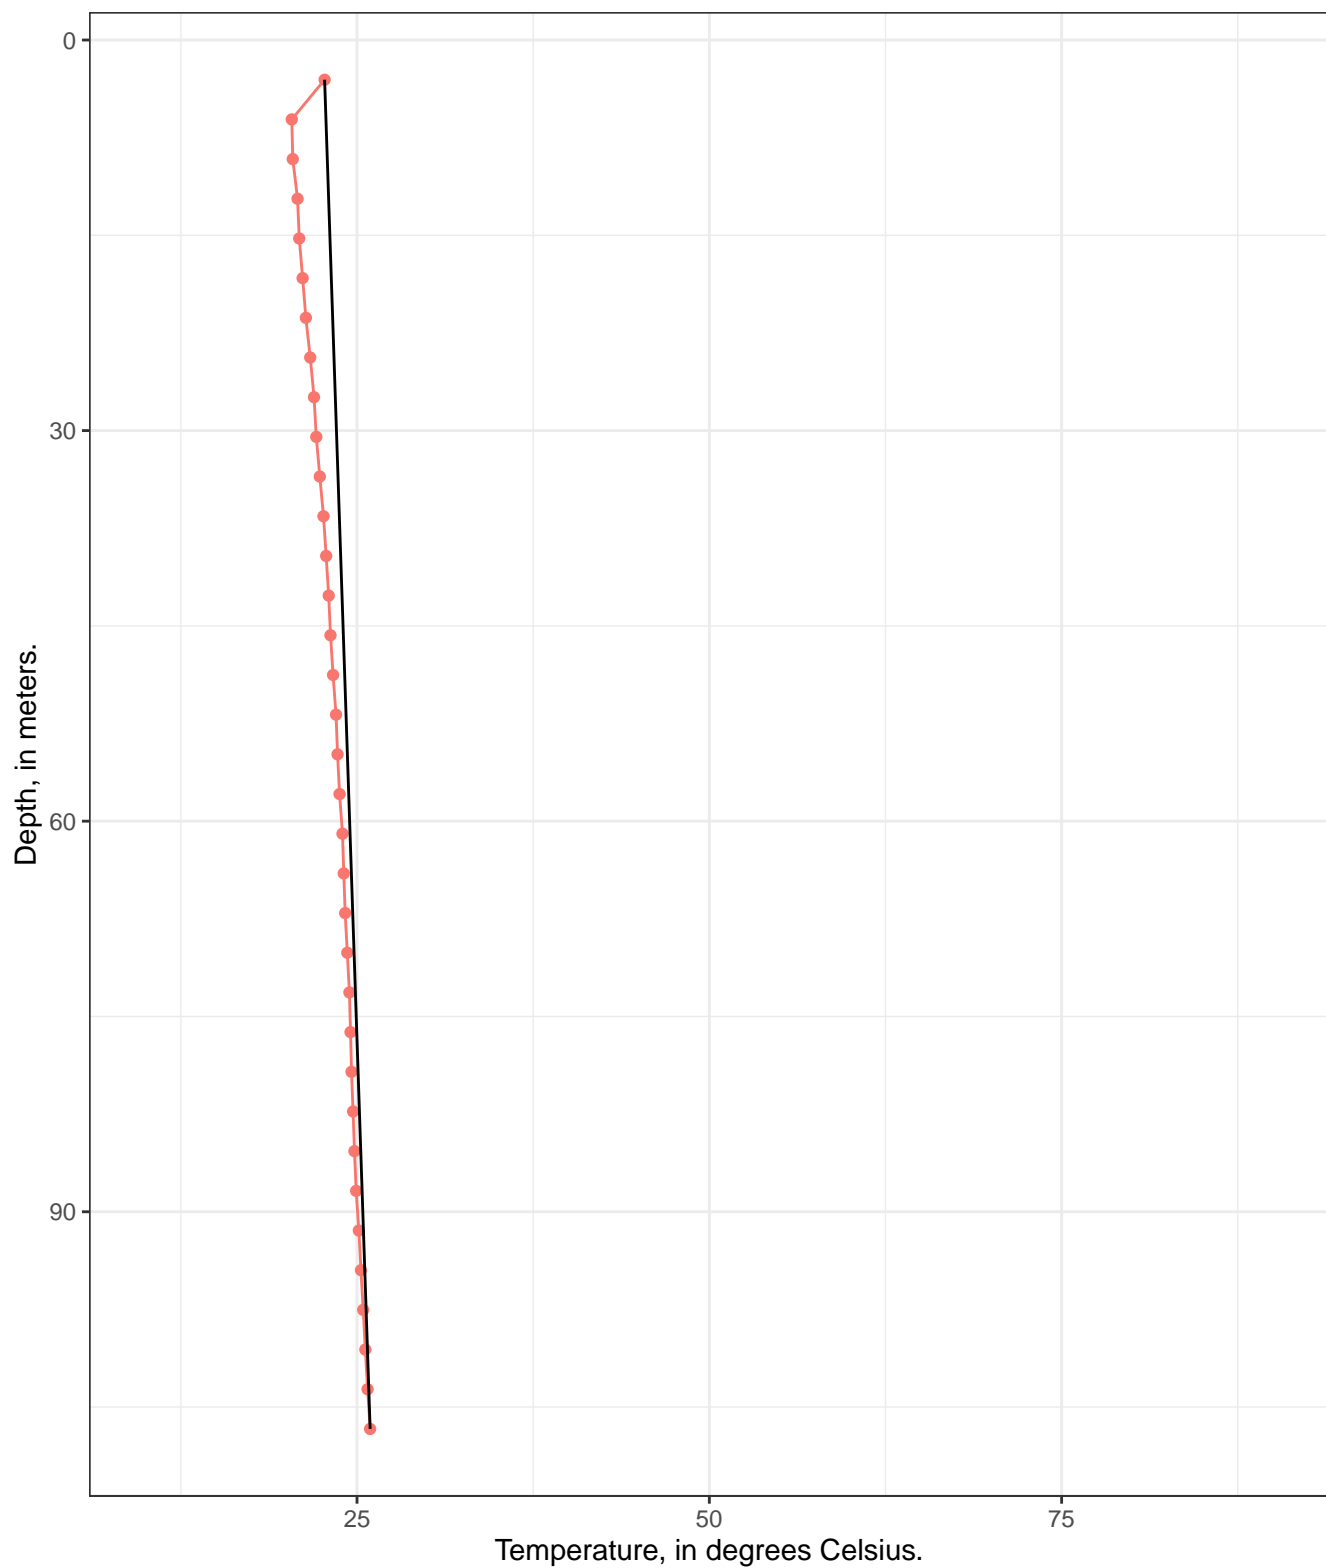

Measurement date 1977-09-12

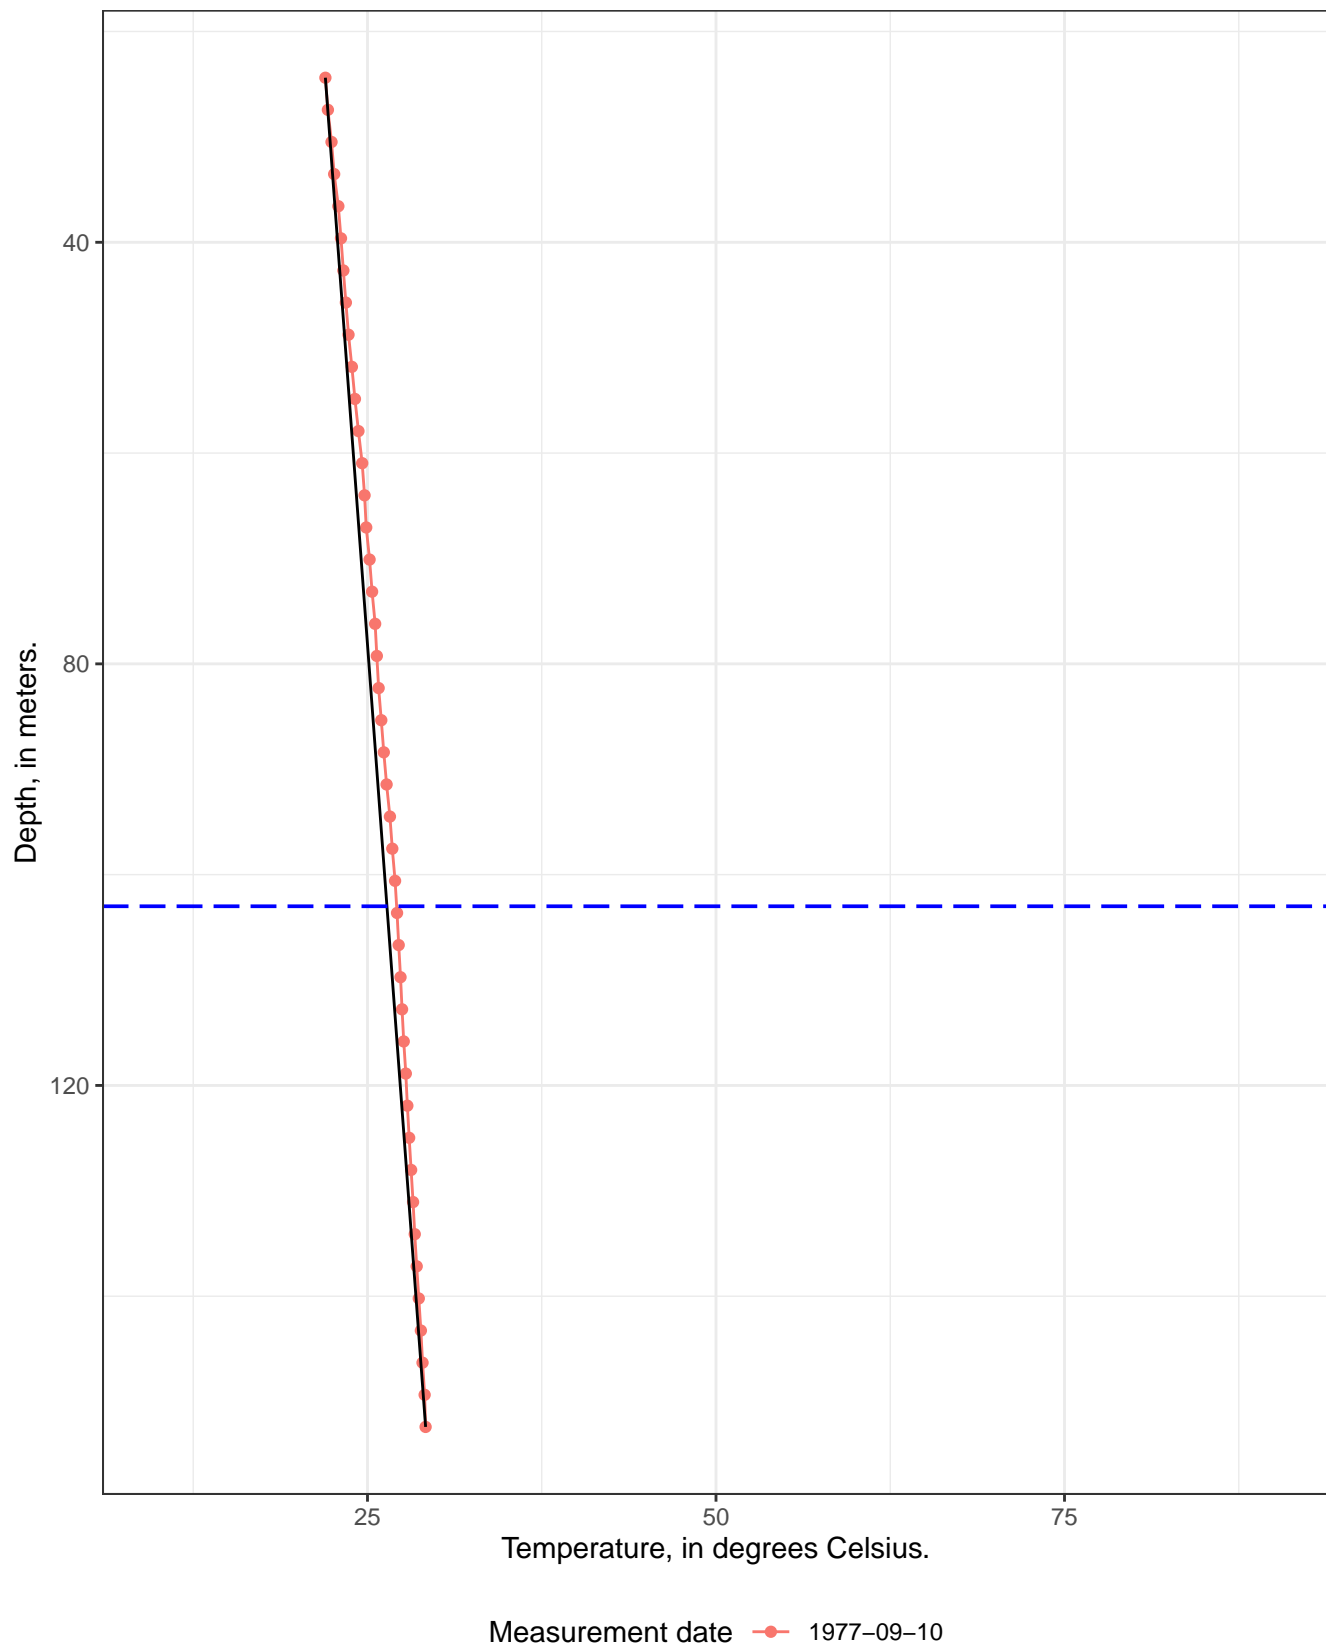

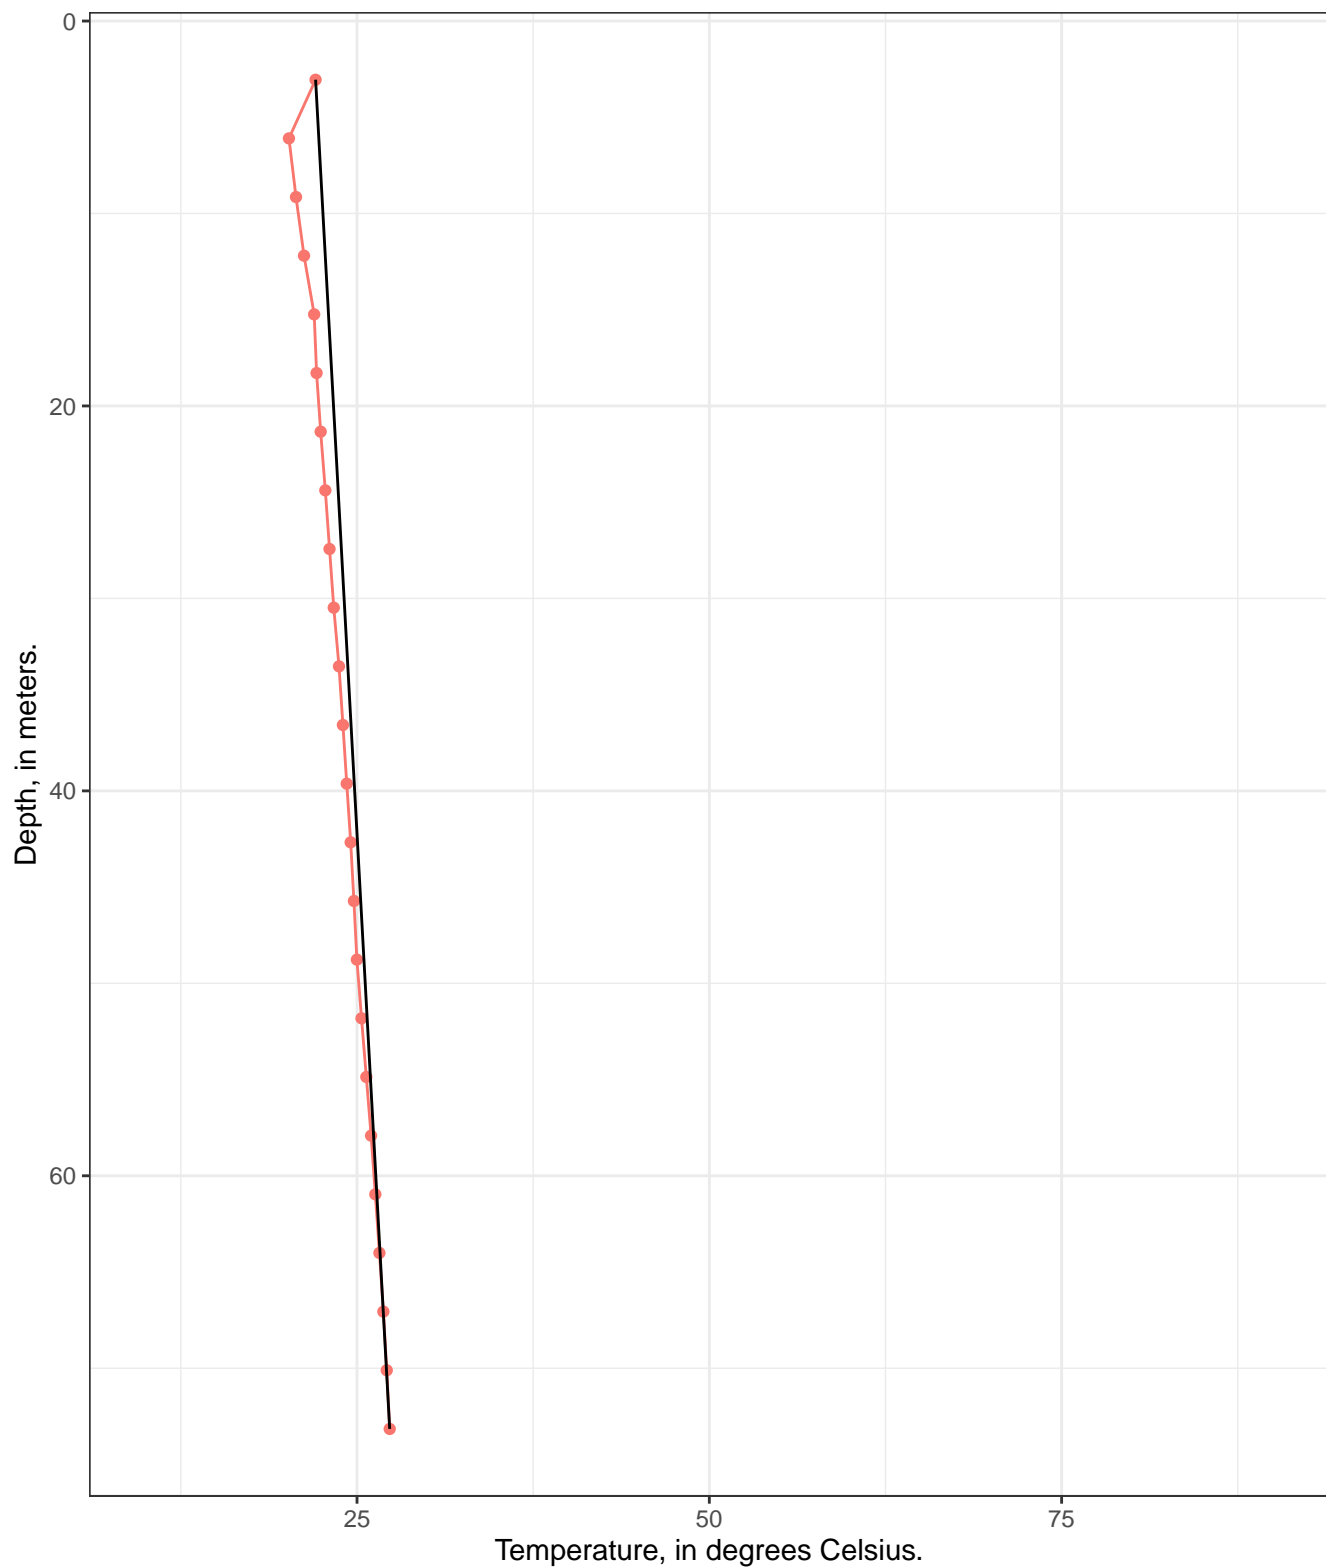

Measurement date 1977-09-12

ID: 123 [H-22-76-39\_KILBOURNE\_HOLE]

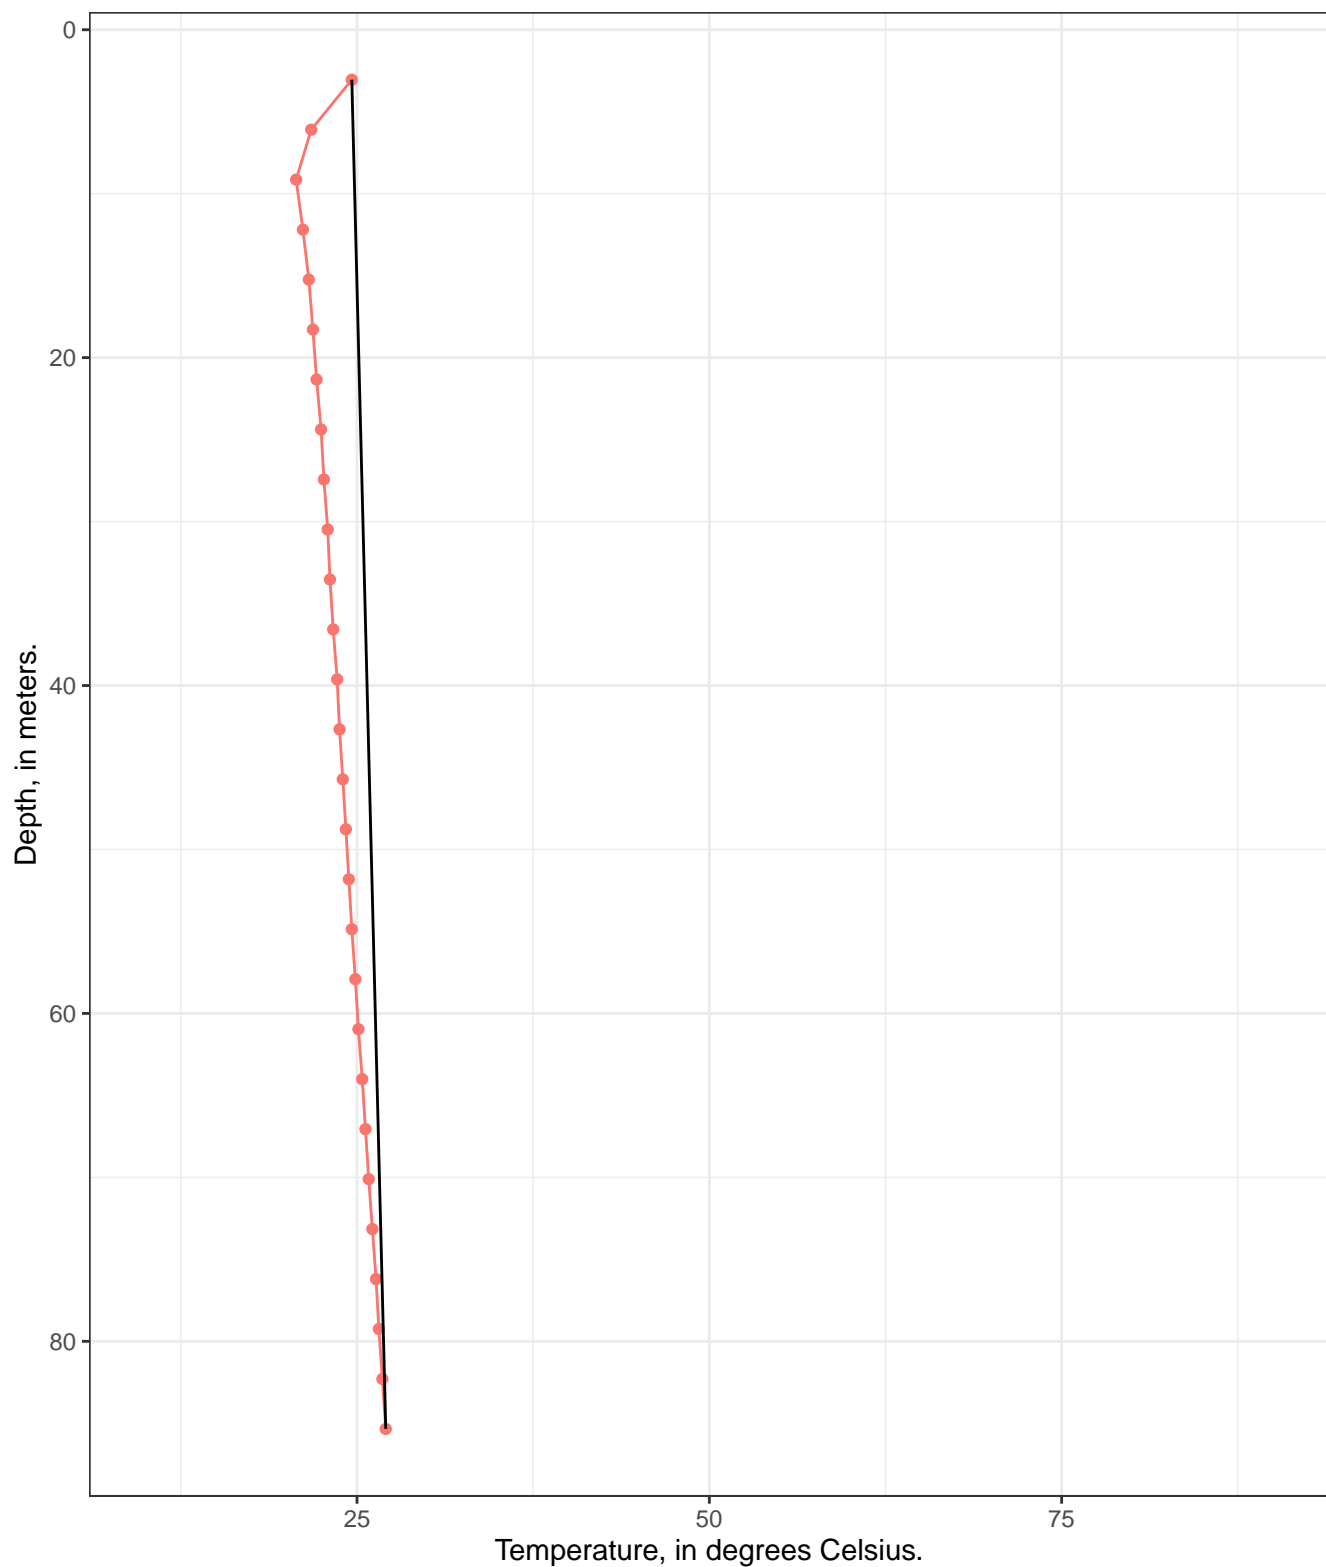

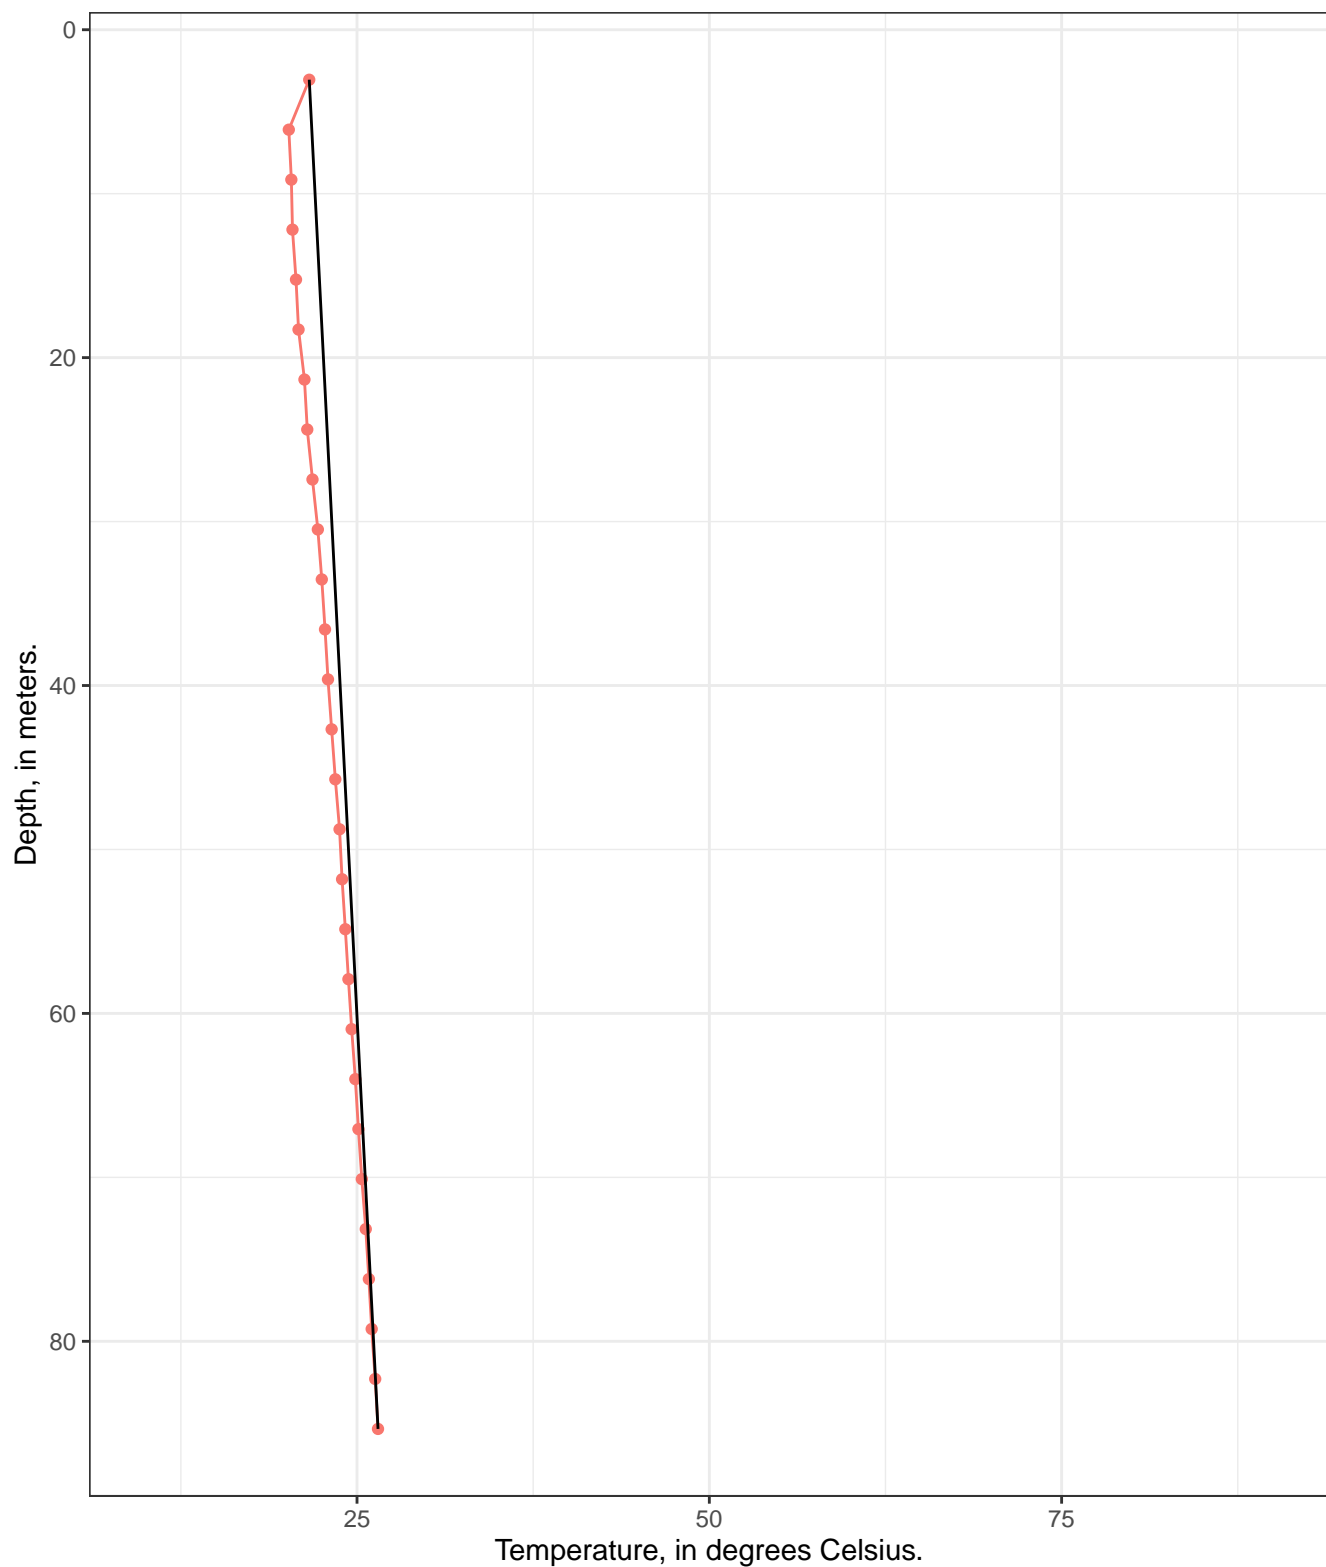

ID: 125 [H-22-76-41\_KILBOURNE\_HOLE]

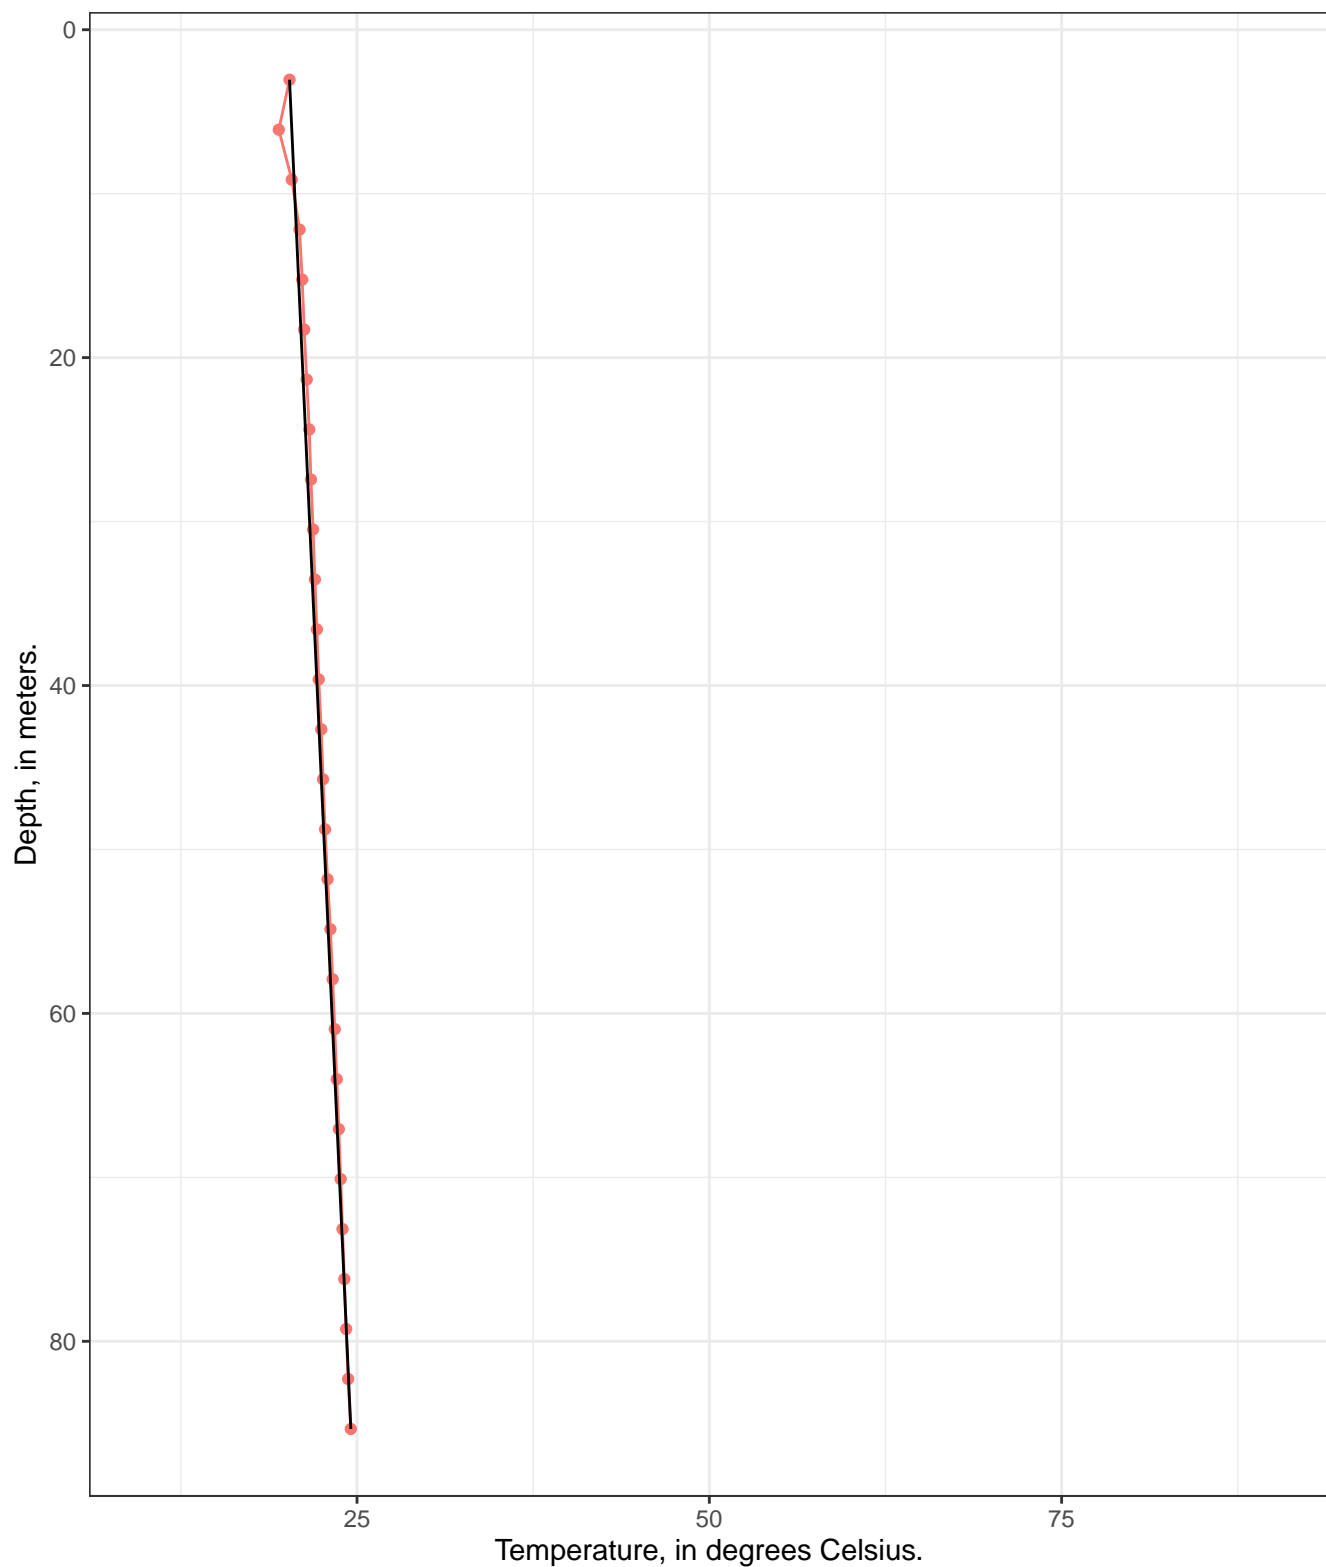

ID: 126 [H-22-76-43\_KILBOURNE\_HOLE]

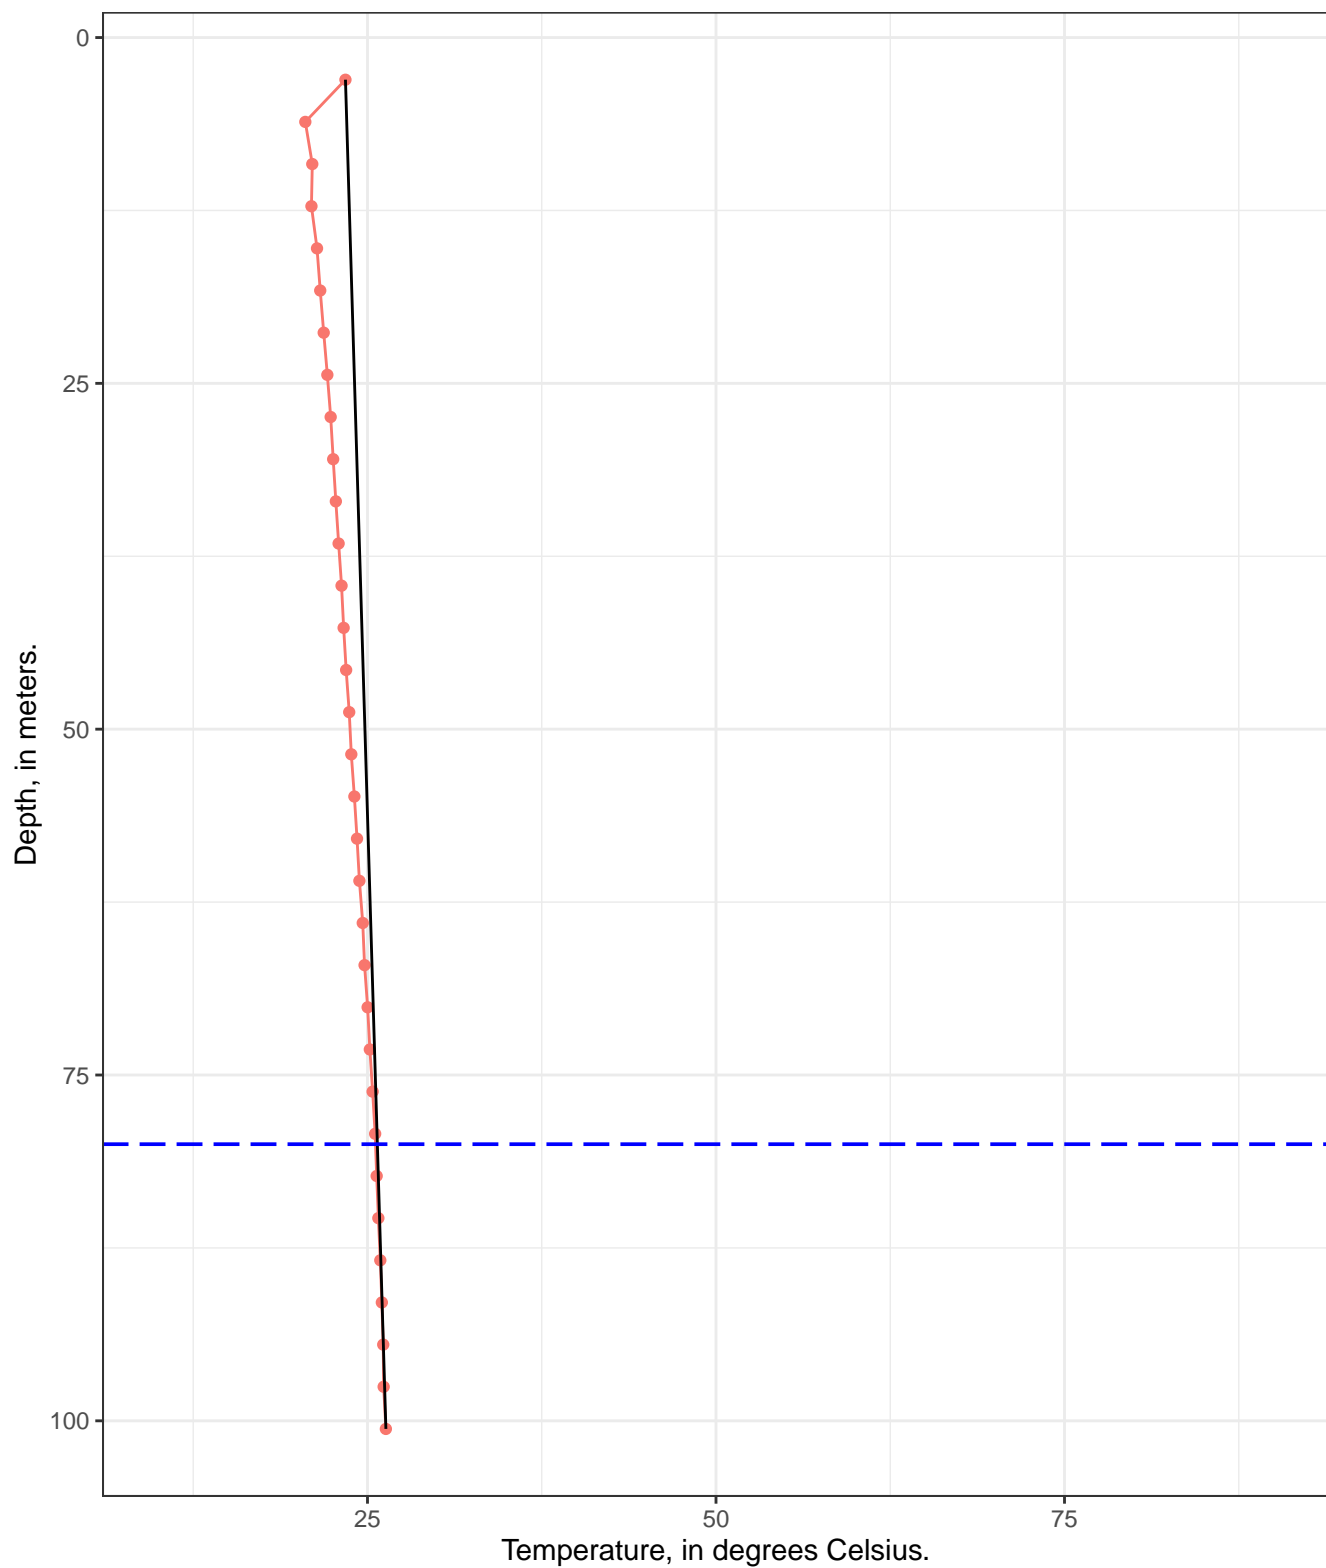

ID: 127 [H-22-76-44\_KILBOURNE\_HOLE]

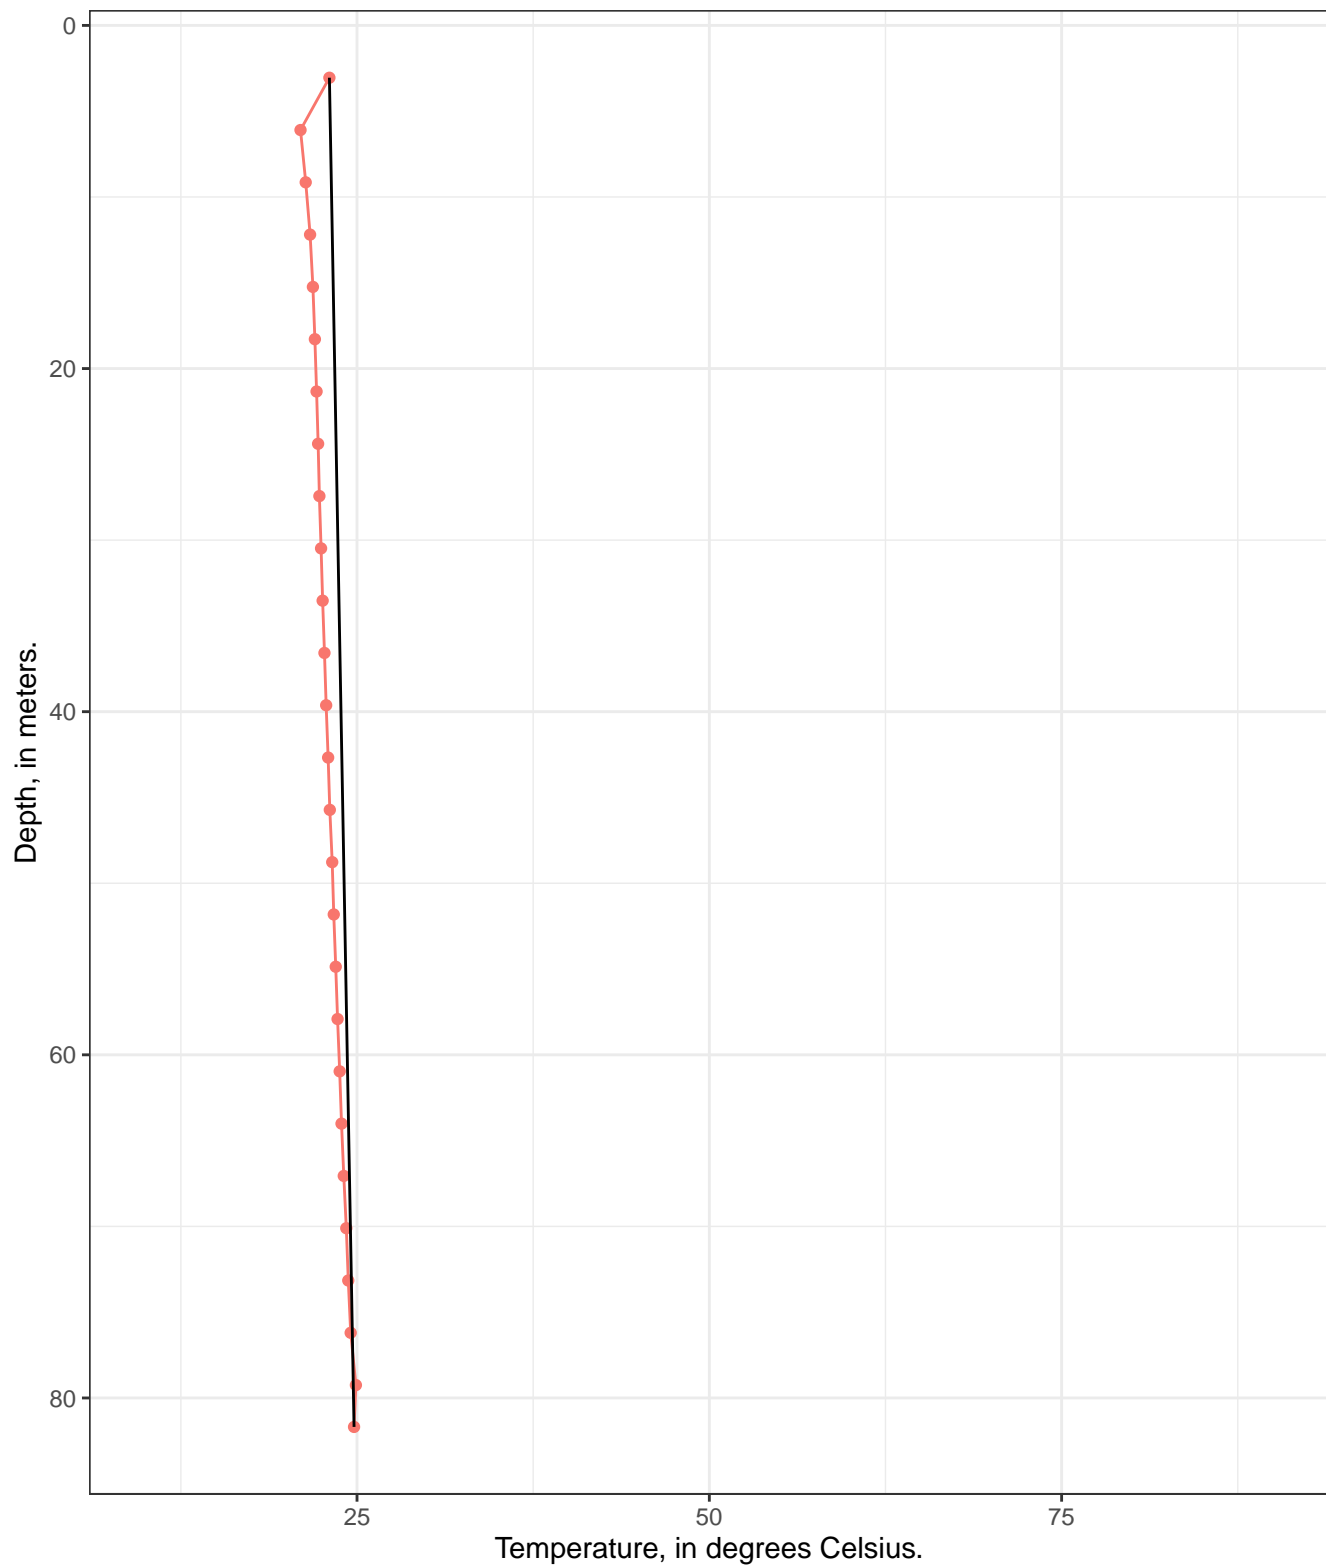

Measurement date 1977-09-14



ID: 128 [H-22-76-47\_KILBOURNE\_HOLE]

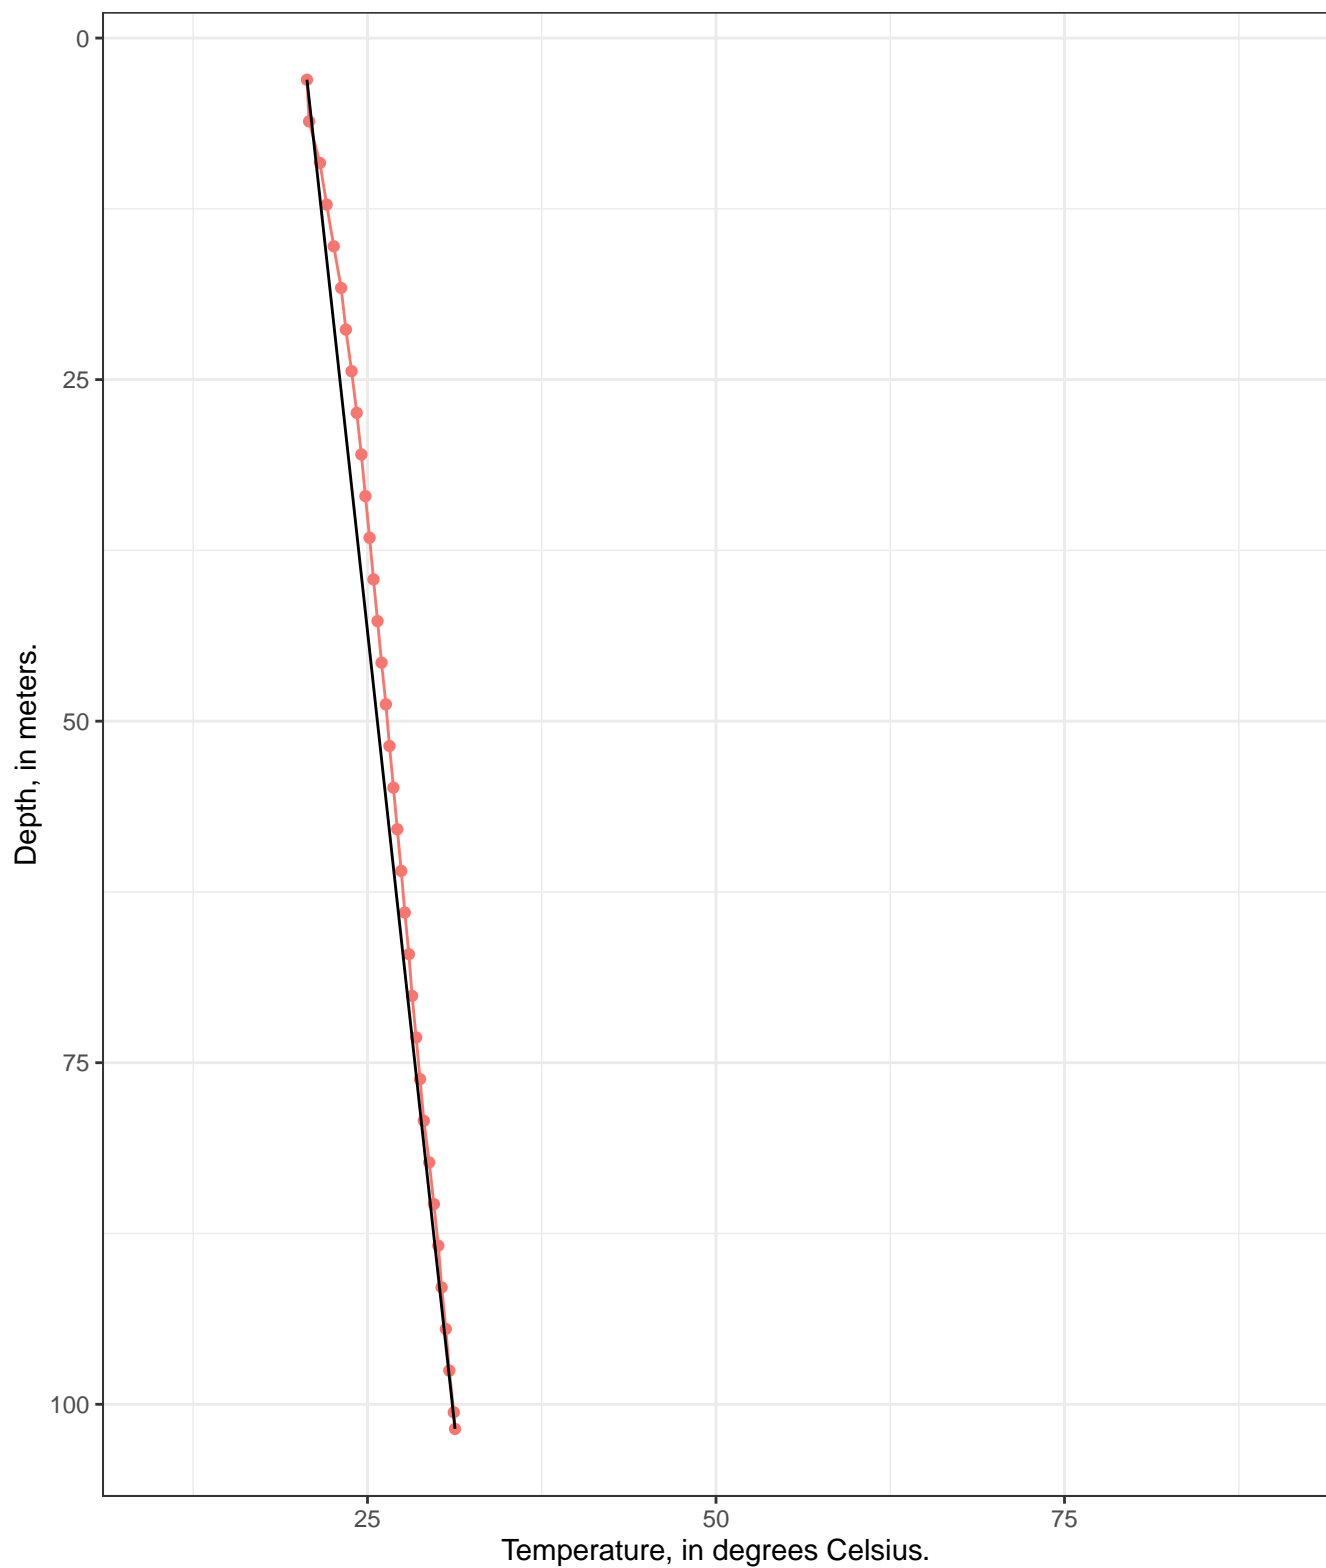

Measurement date 1977-06-25

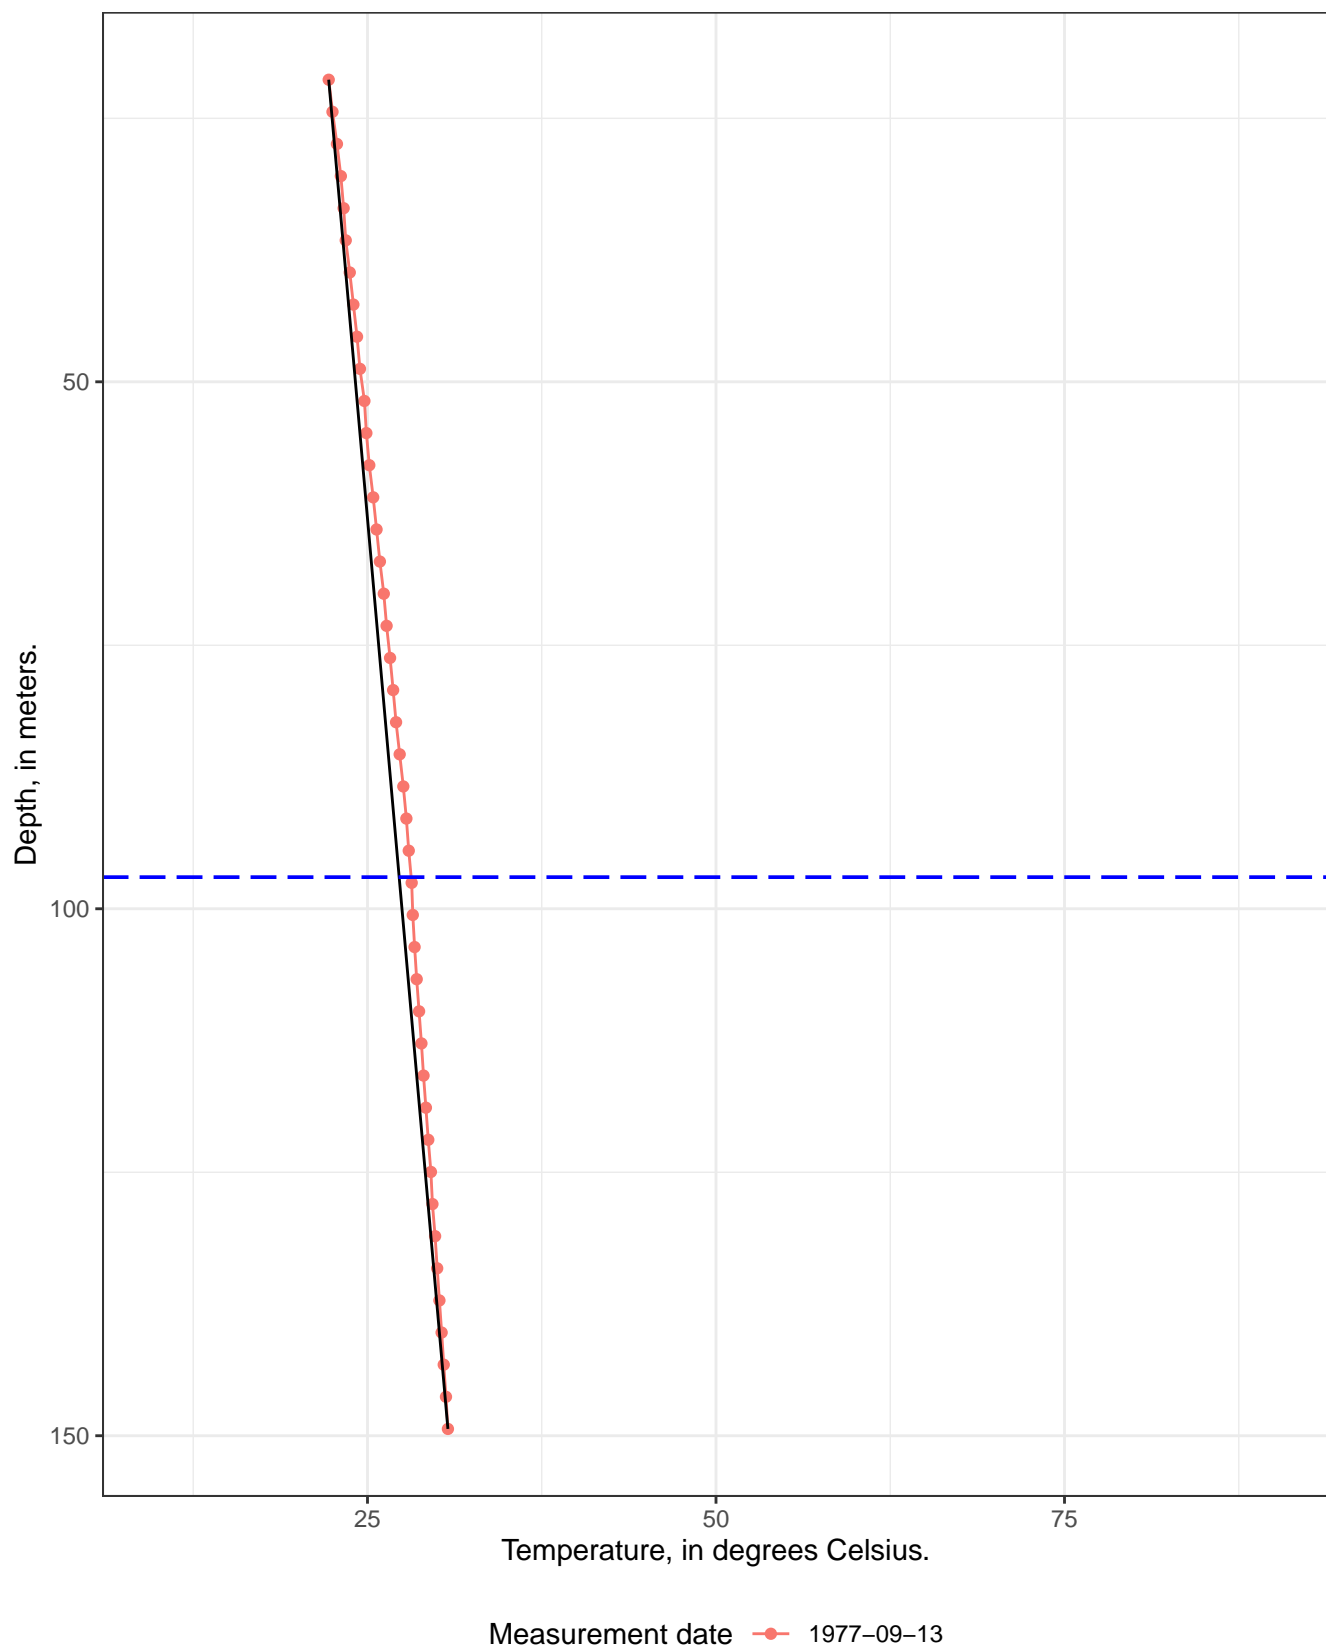

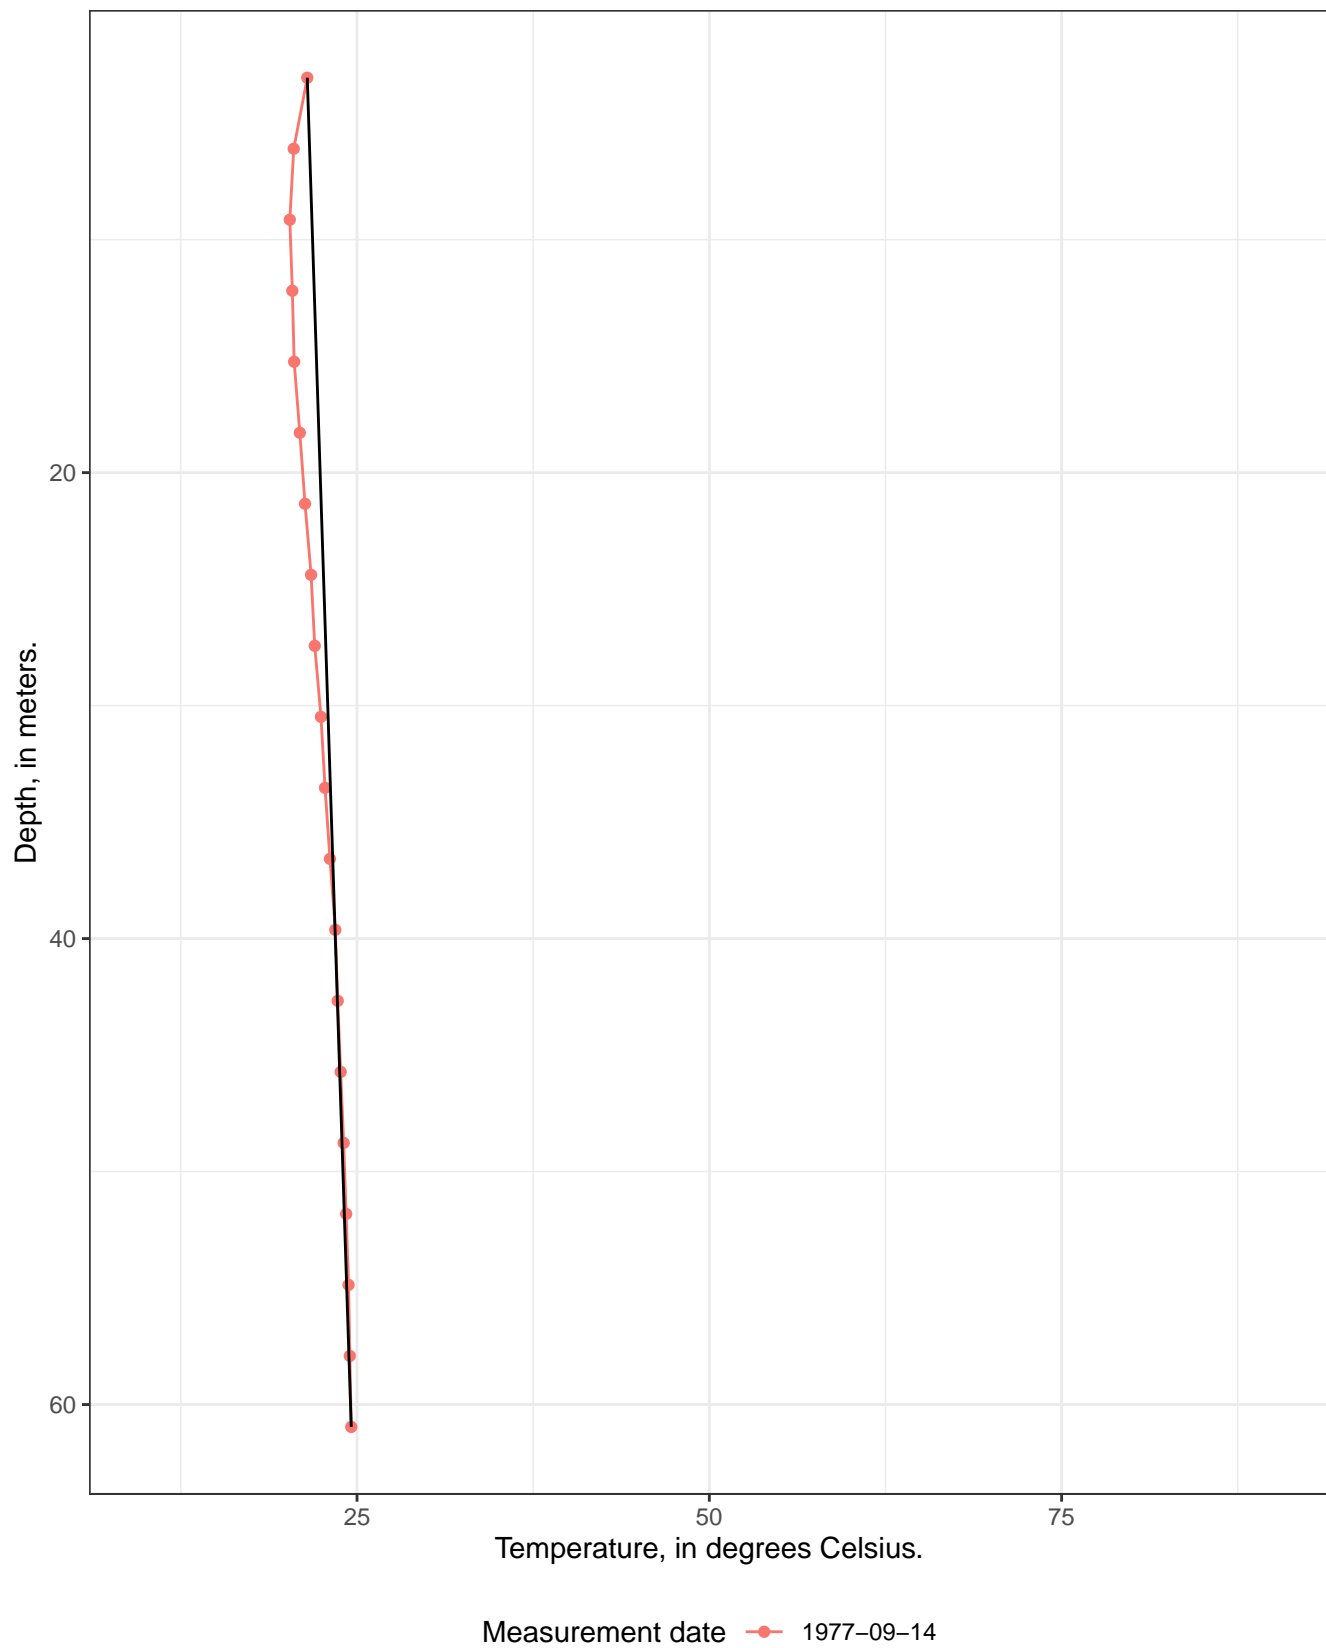

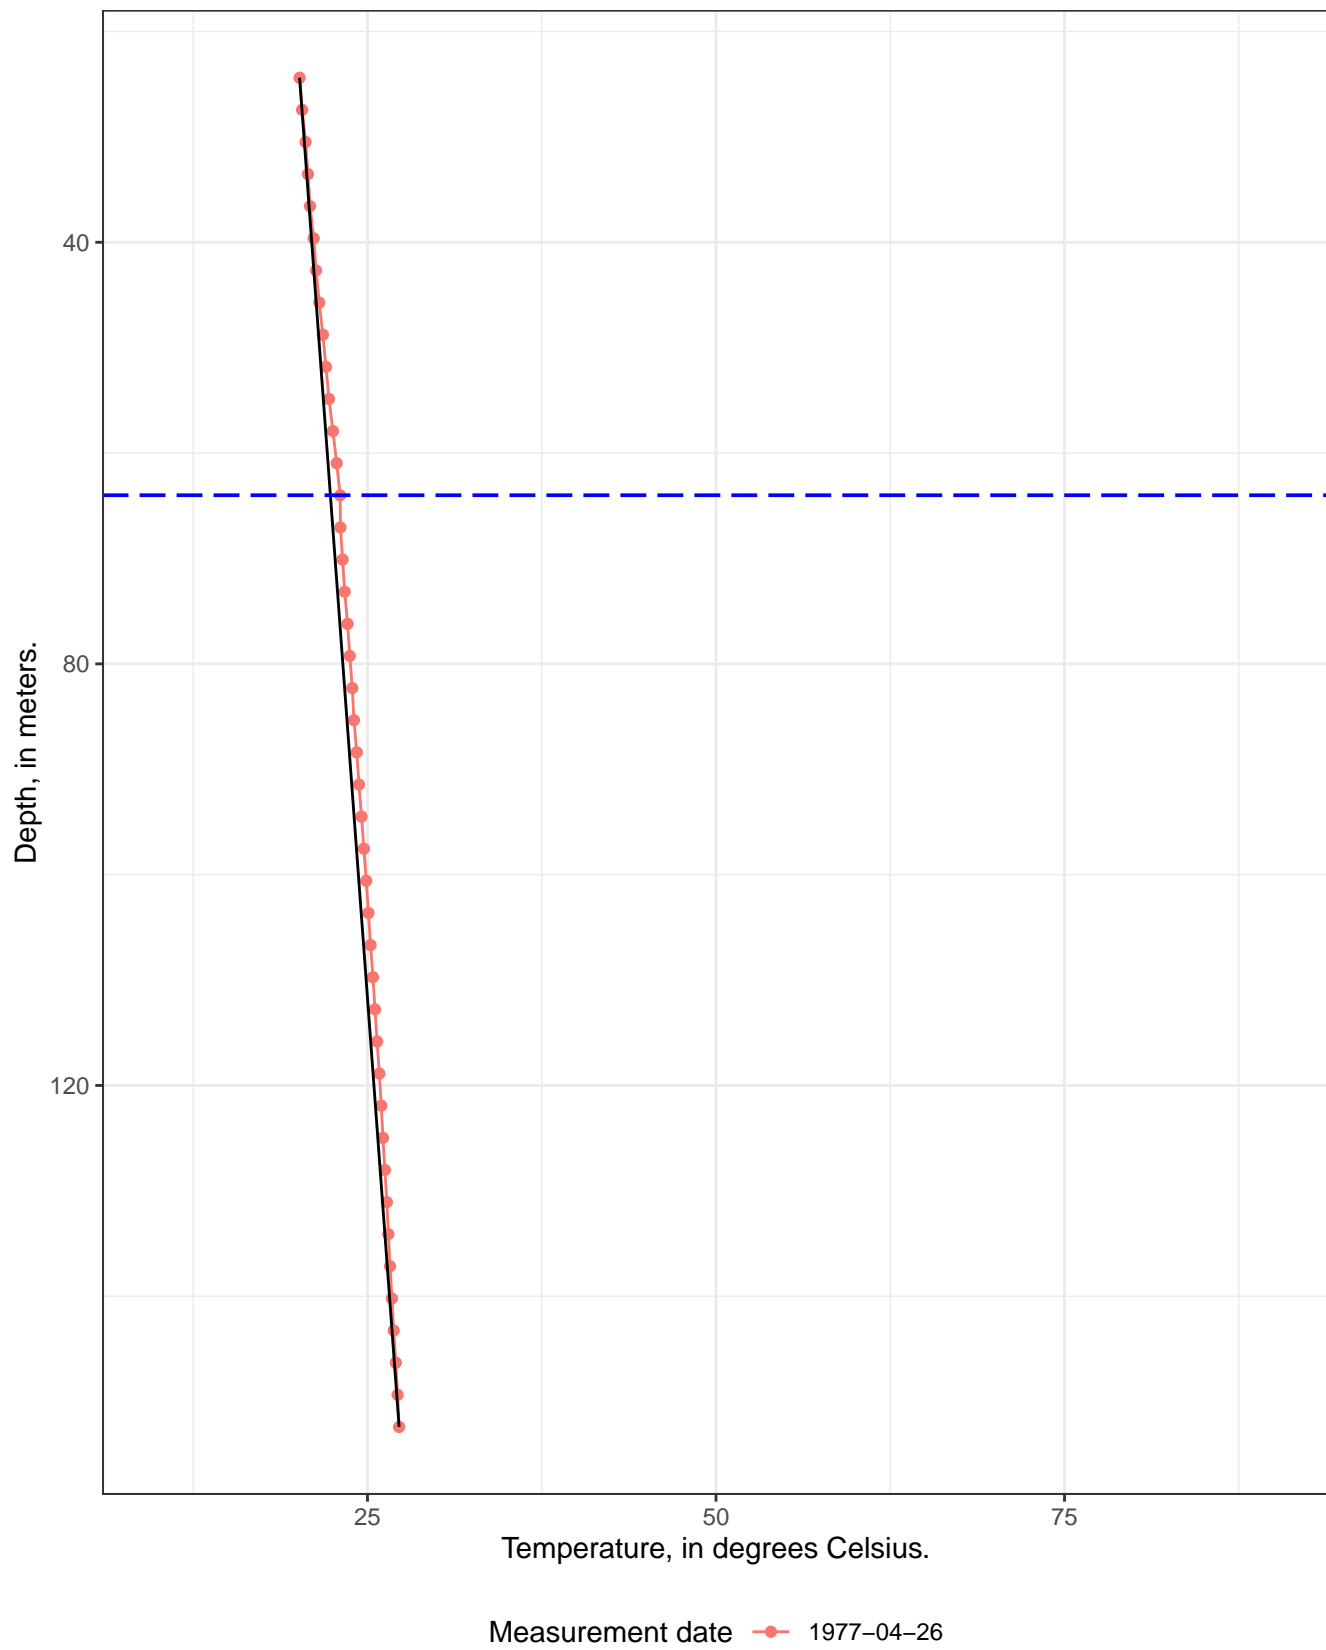

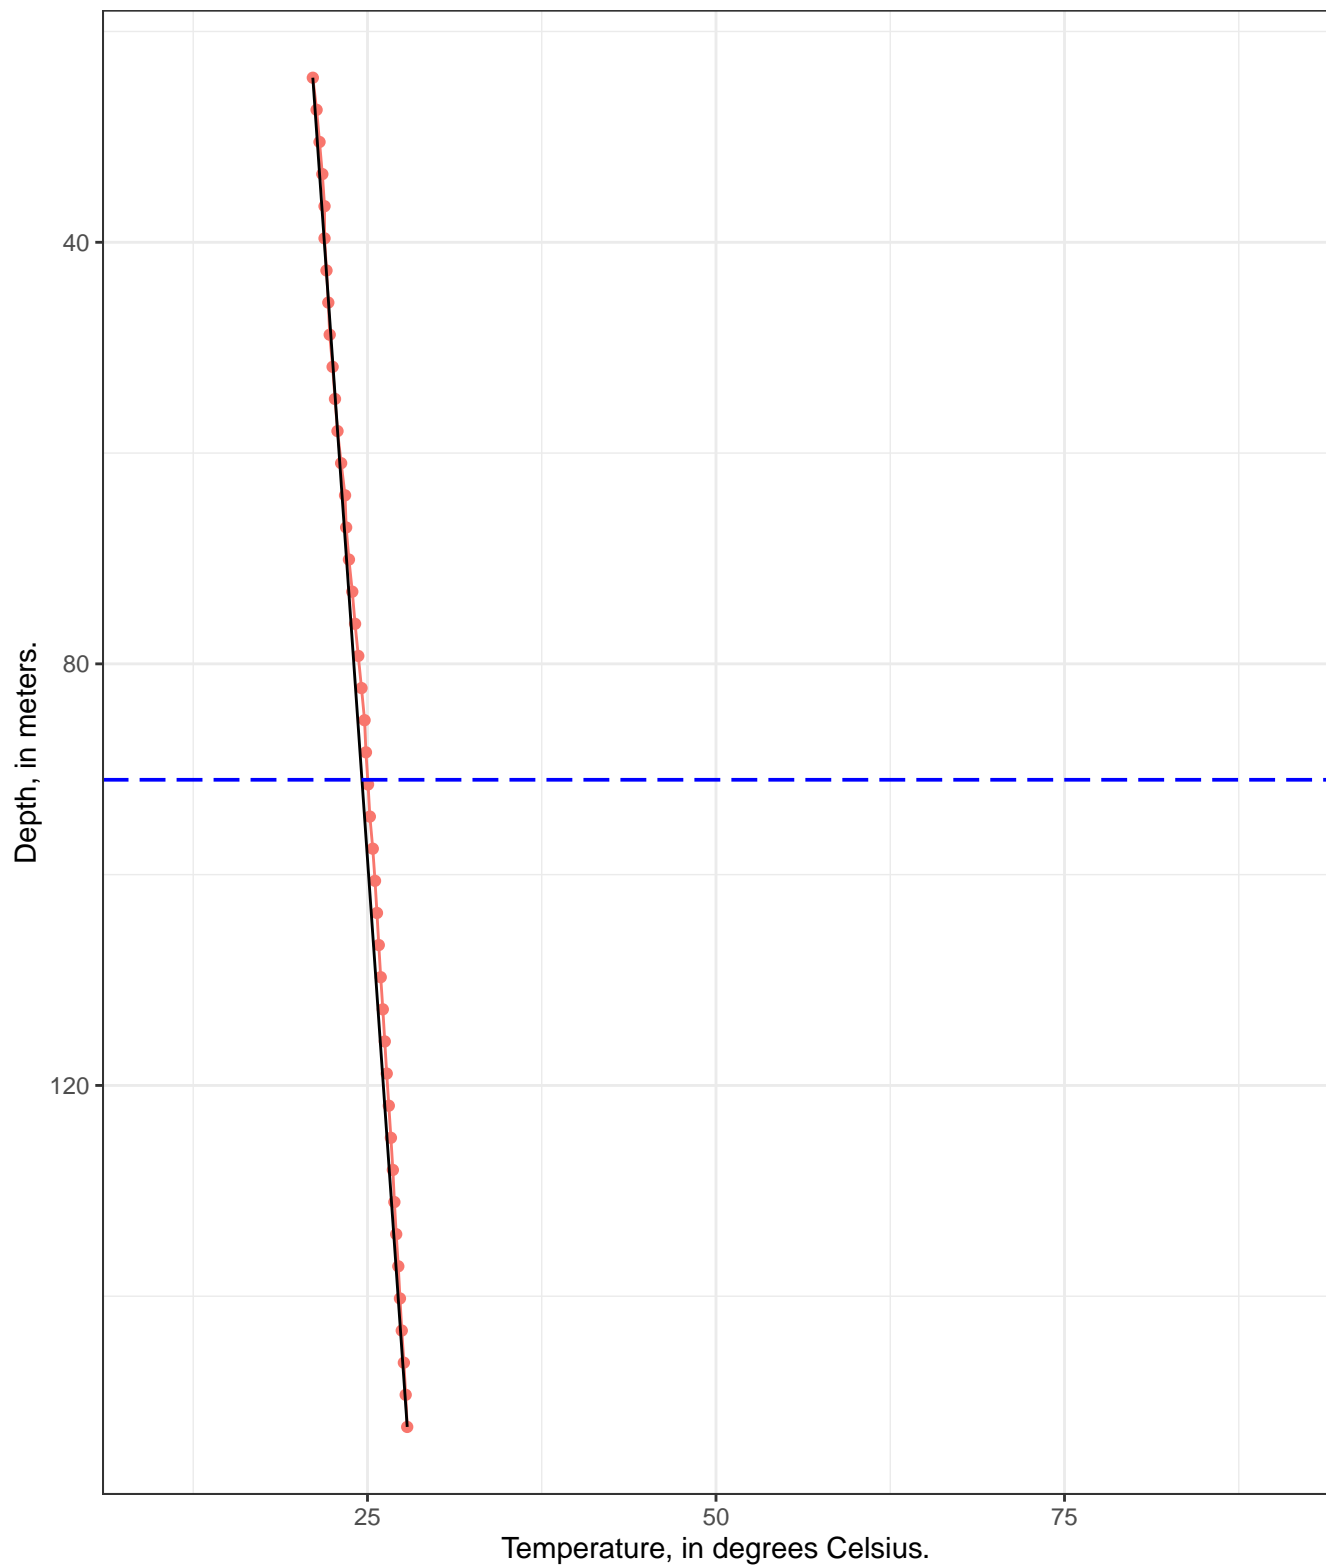

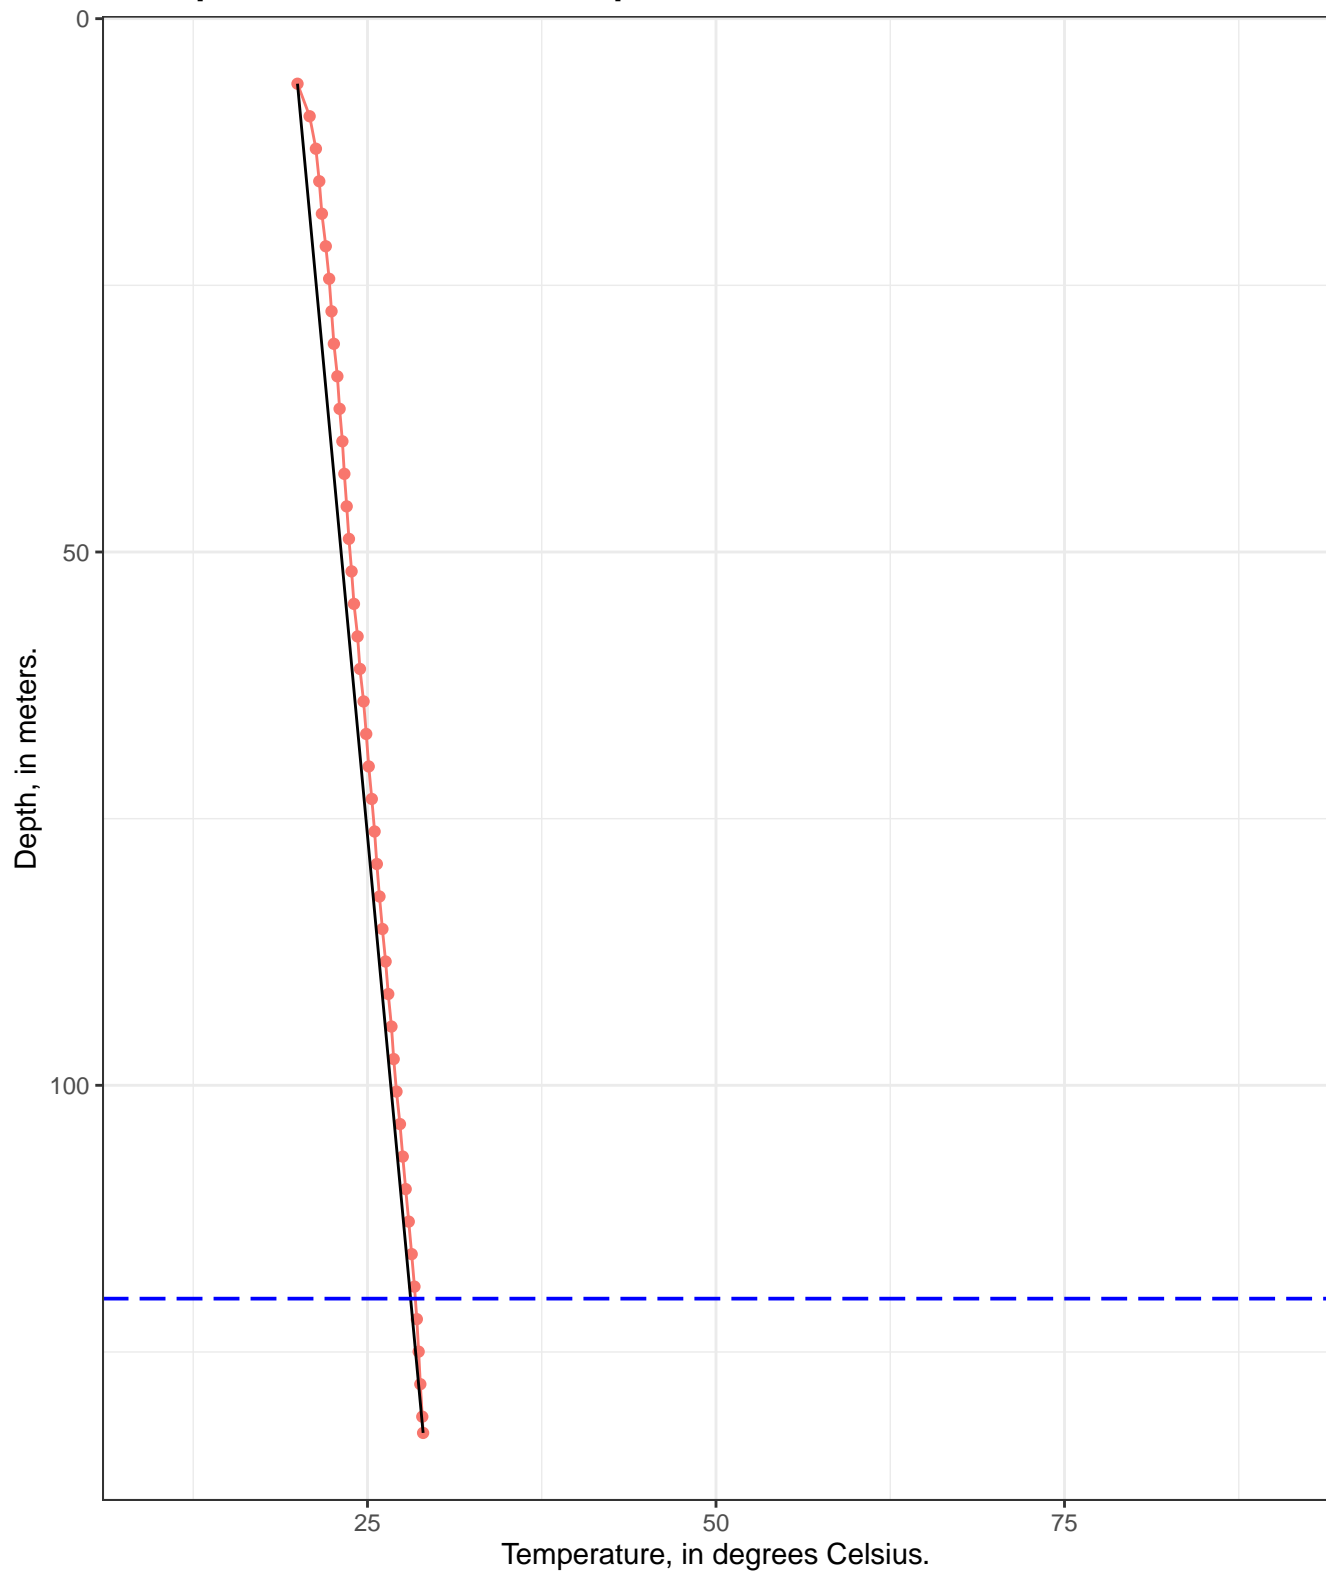

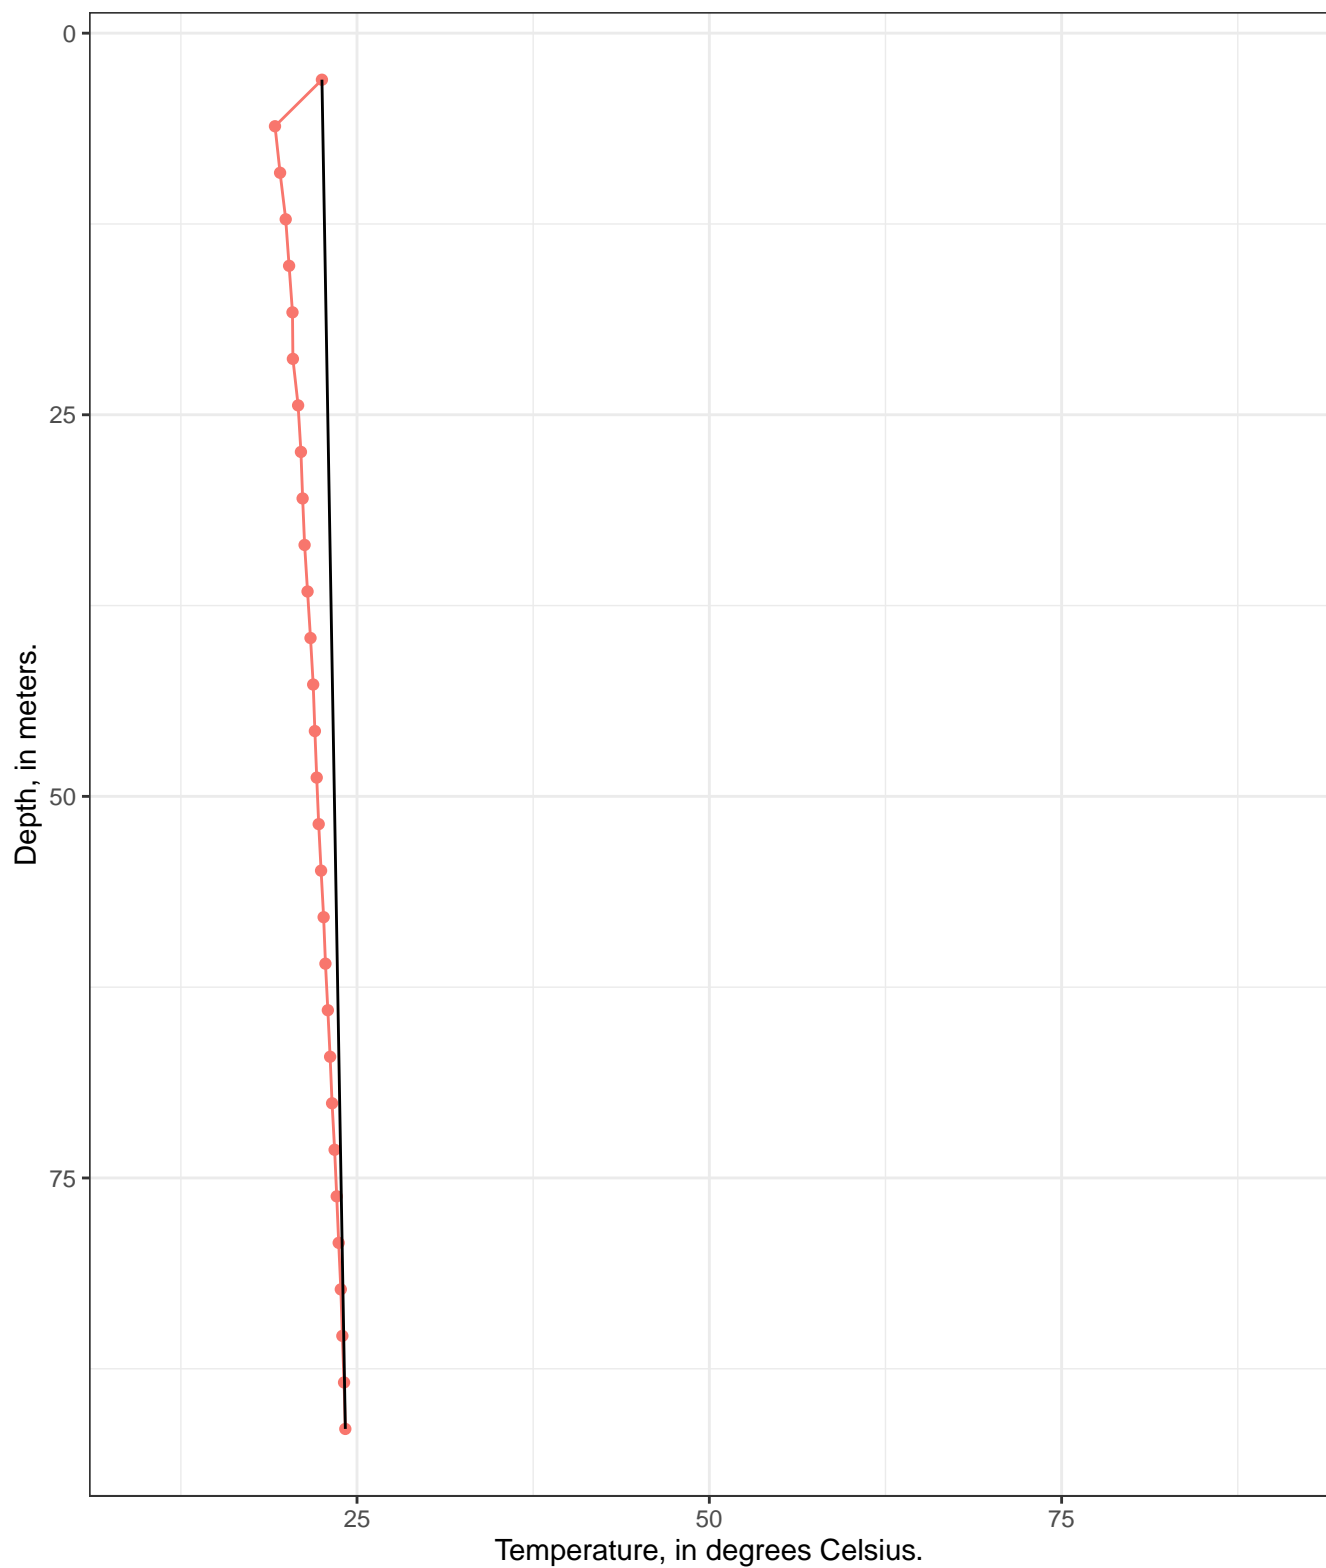

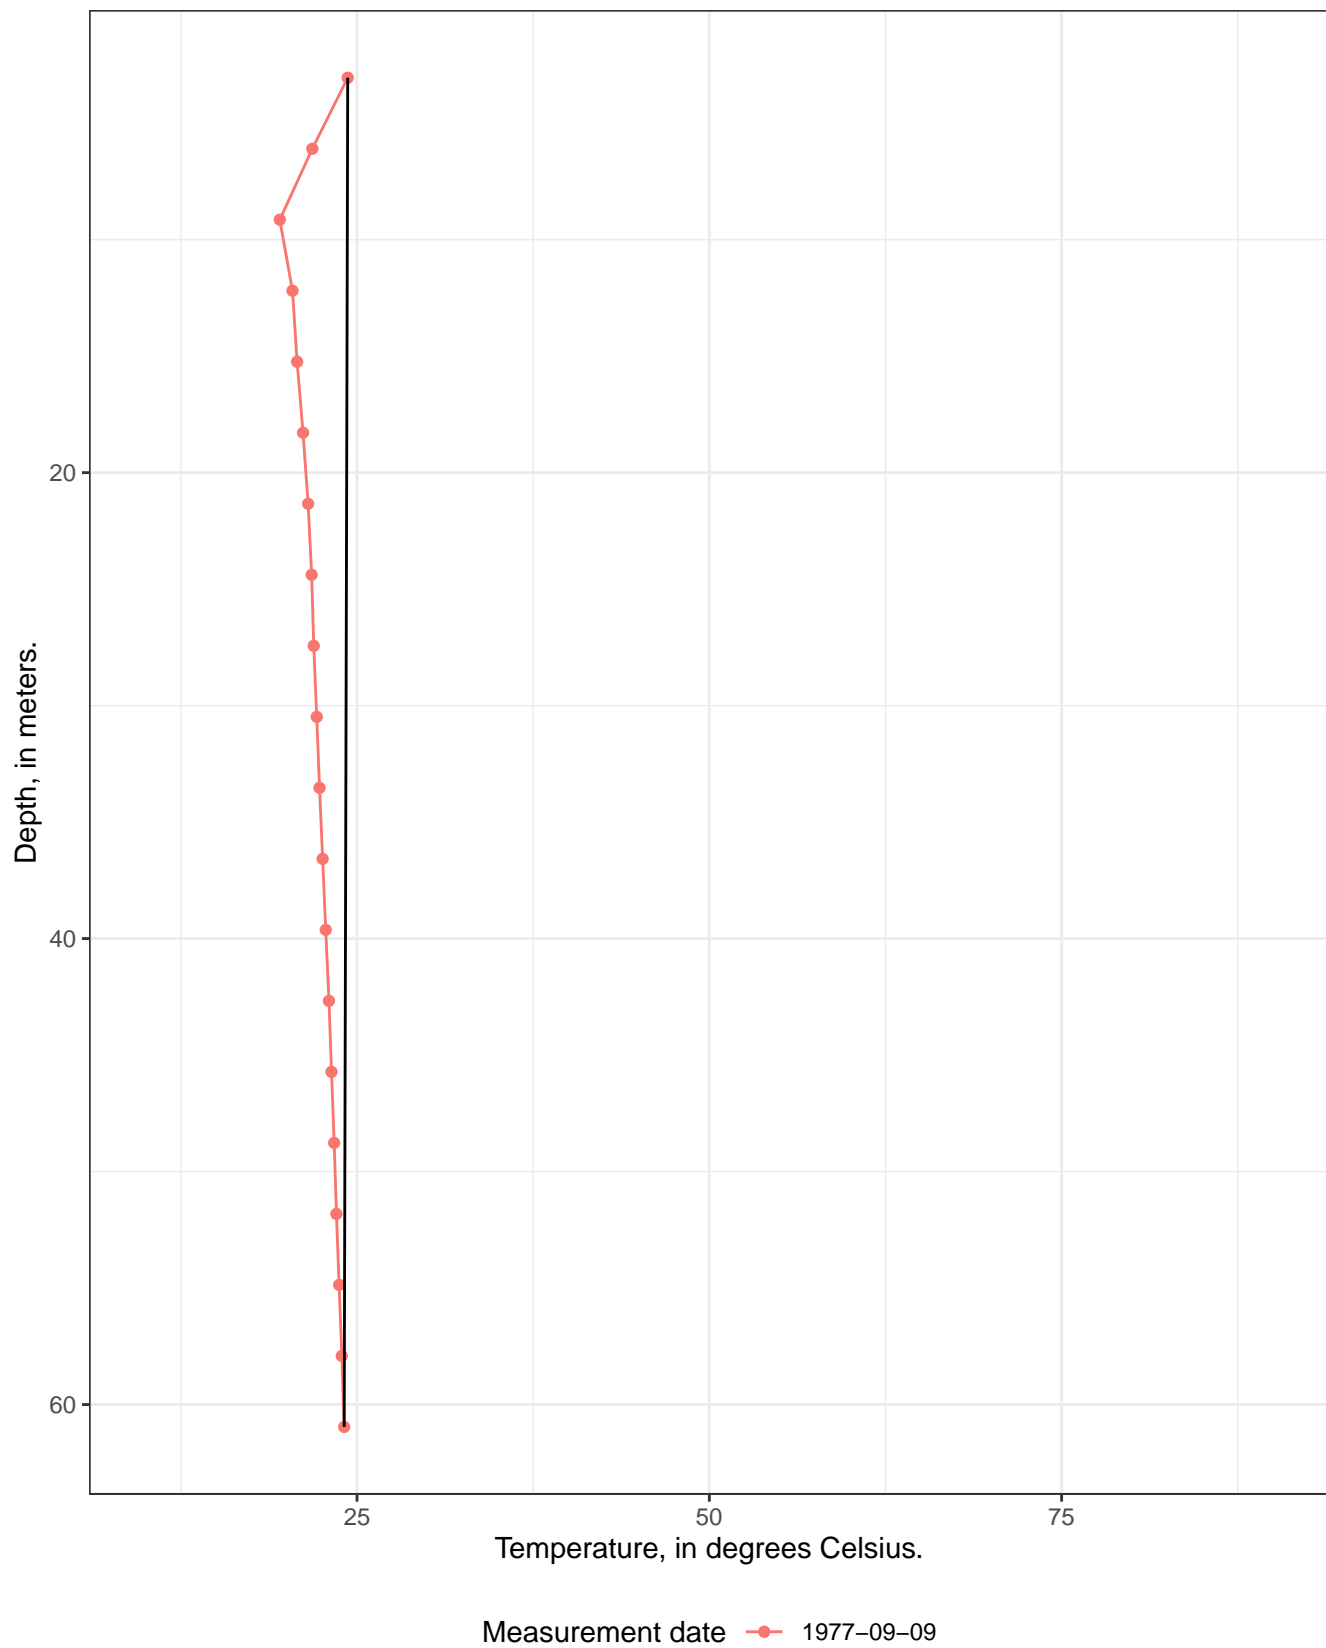



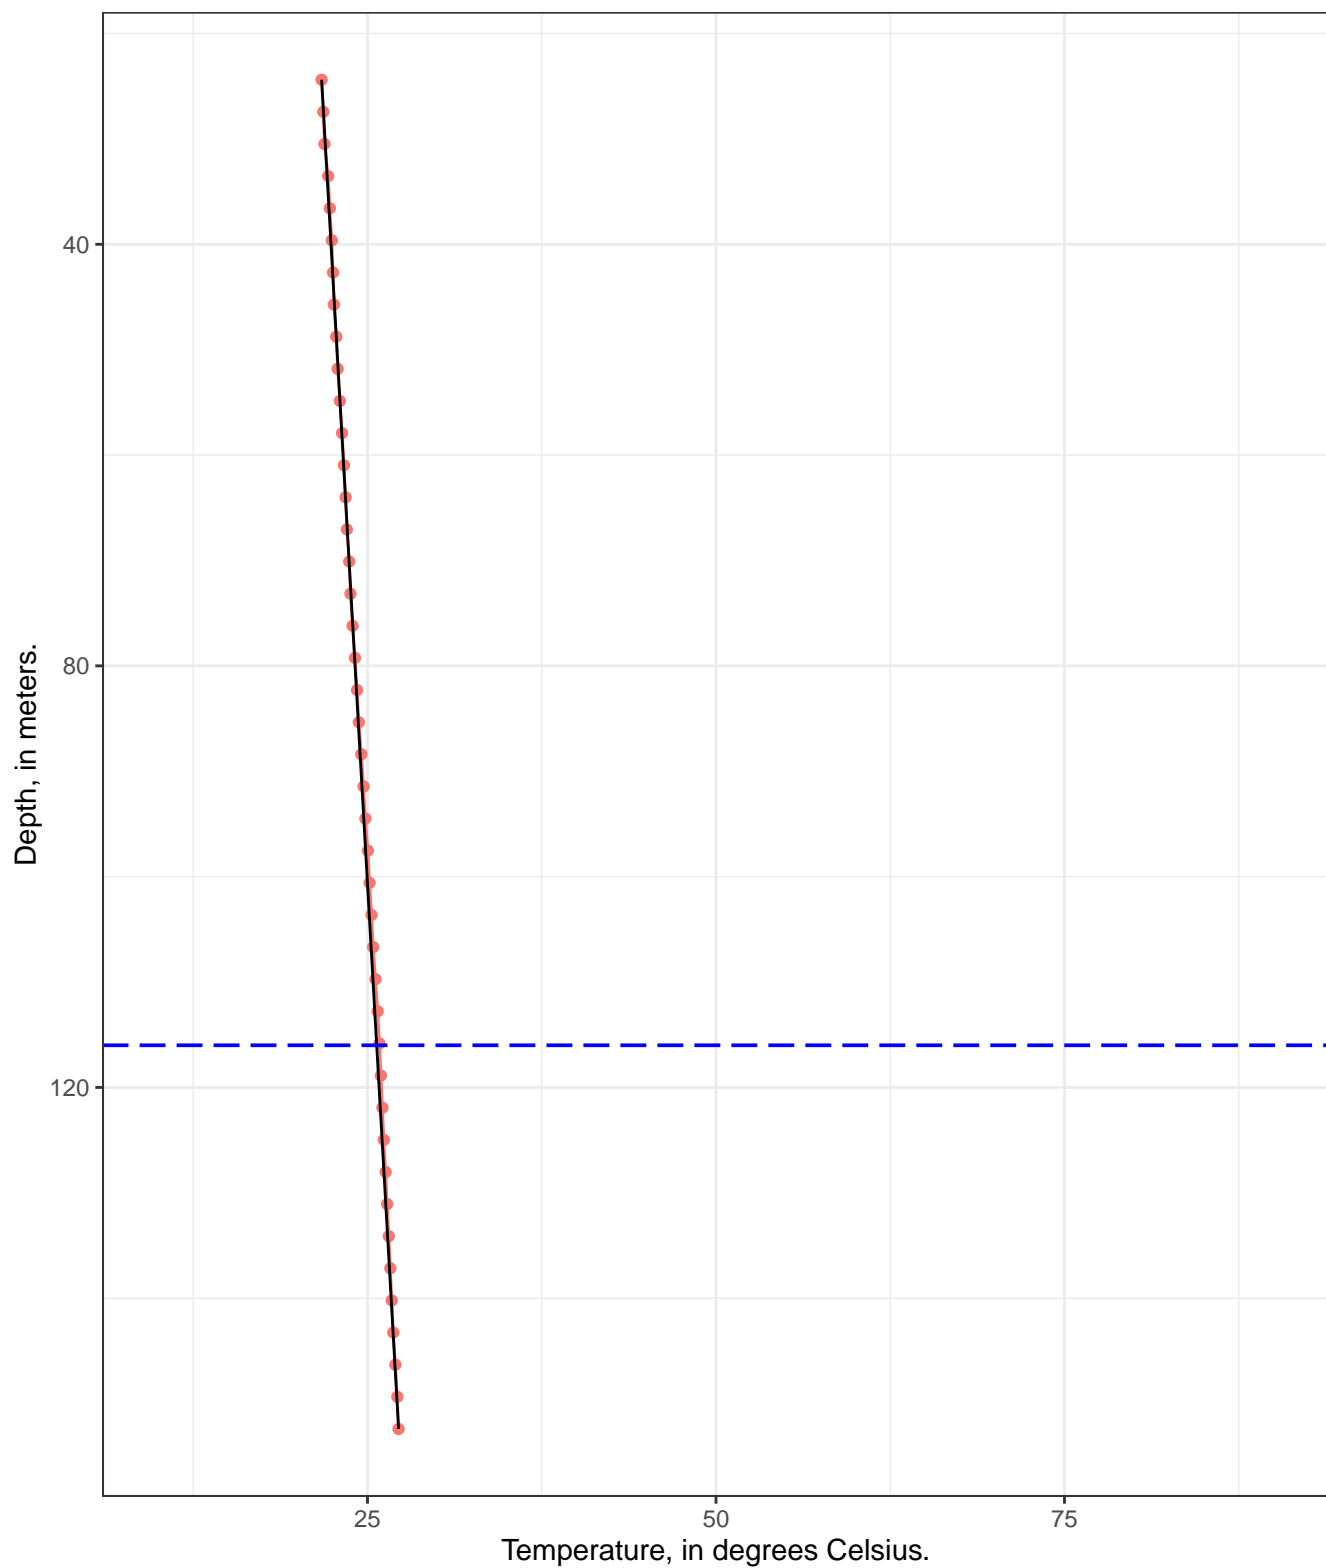

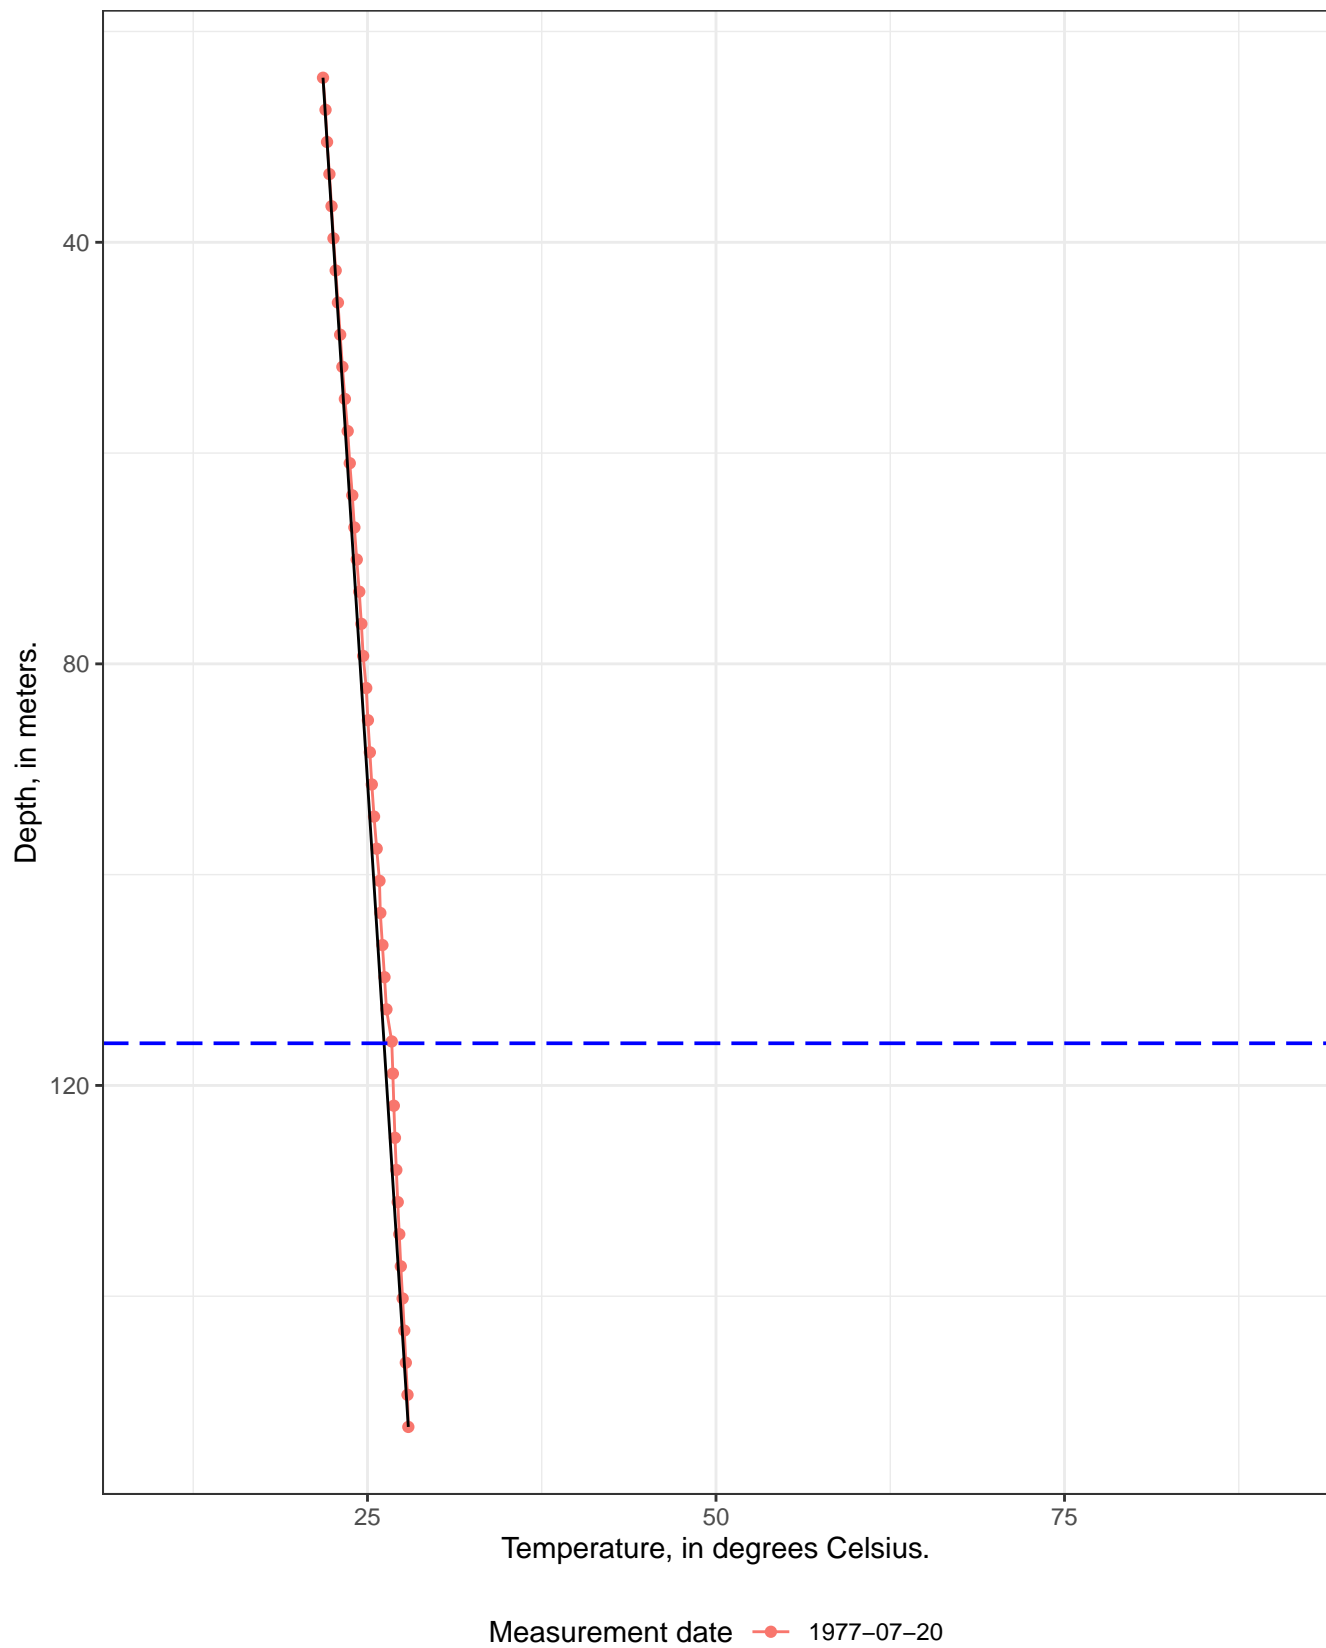

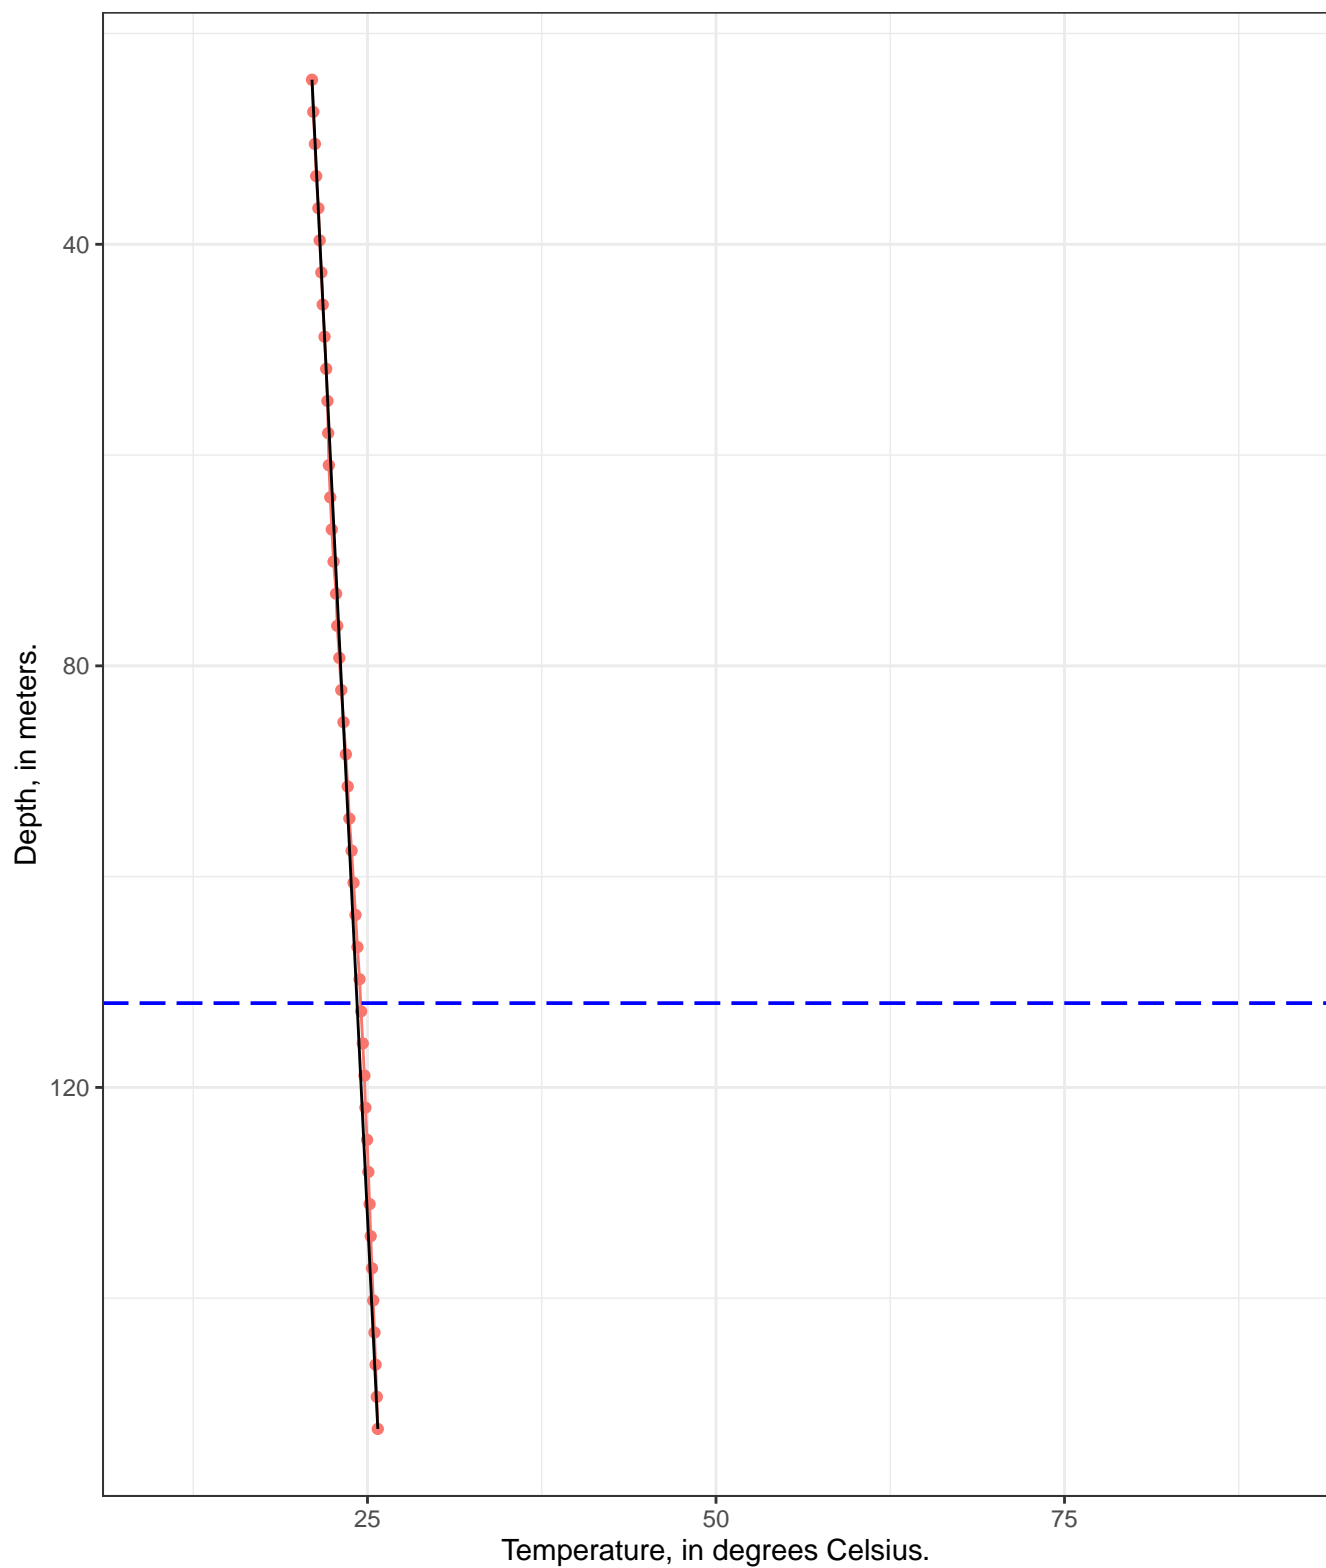

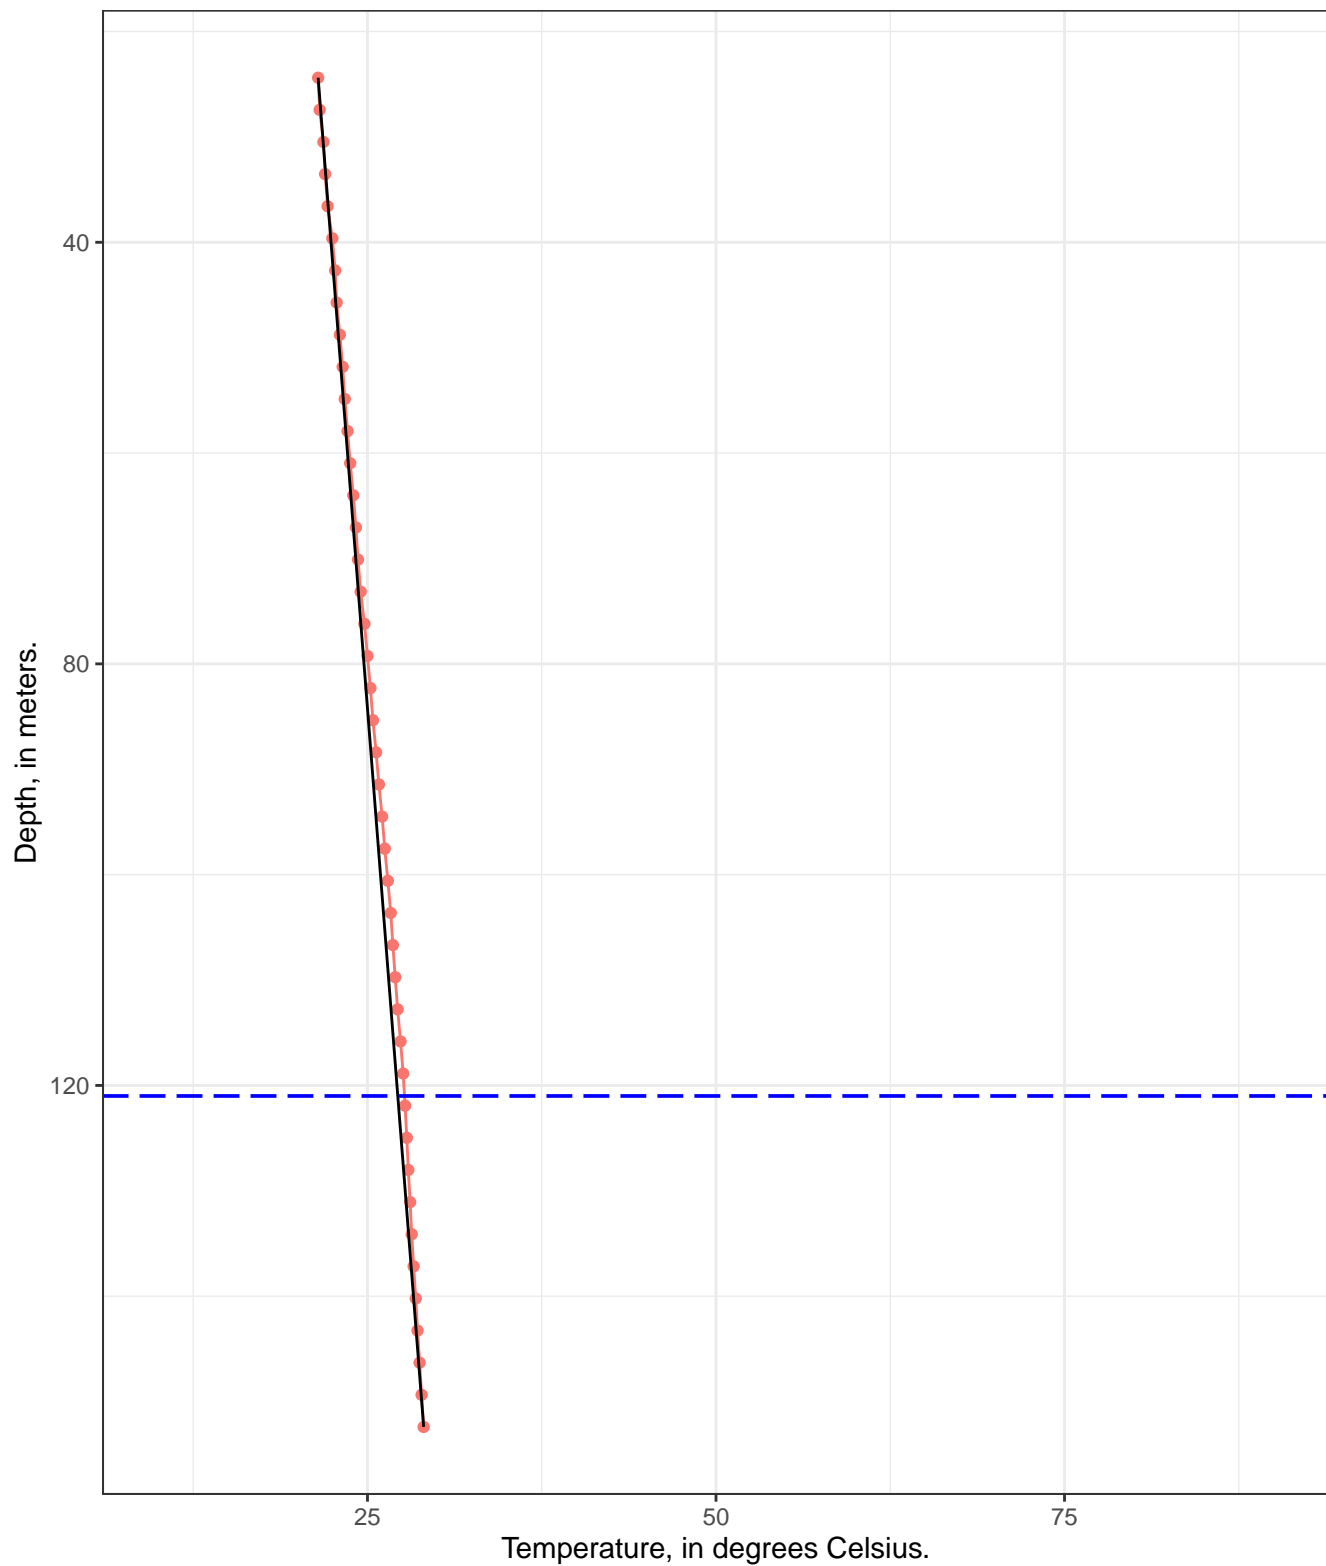

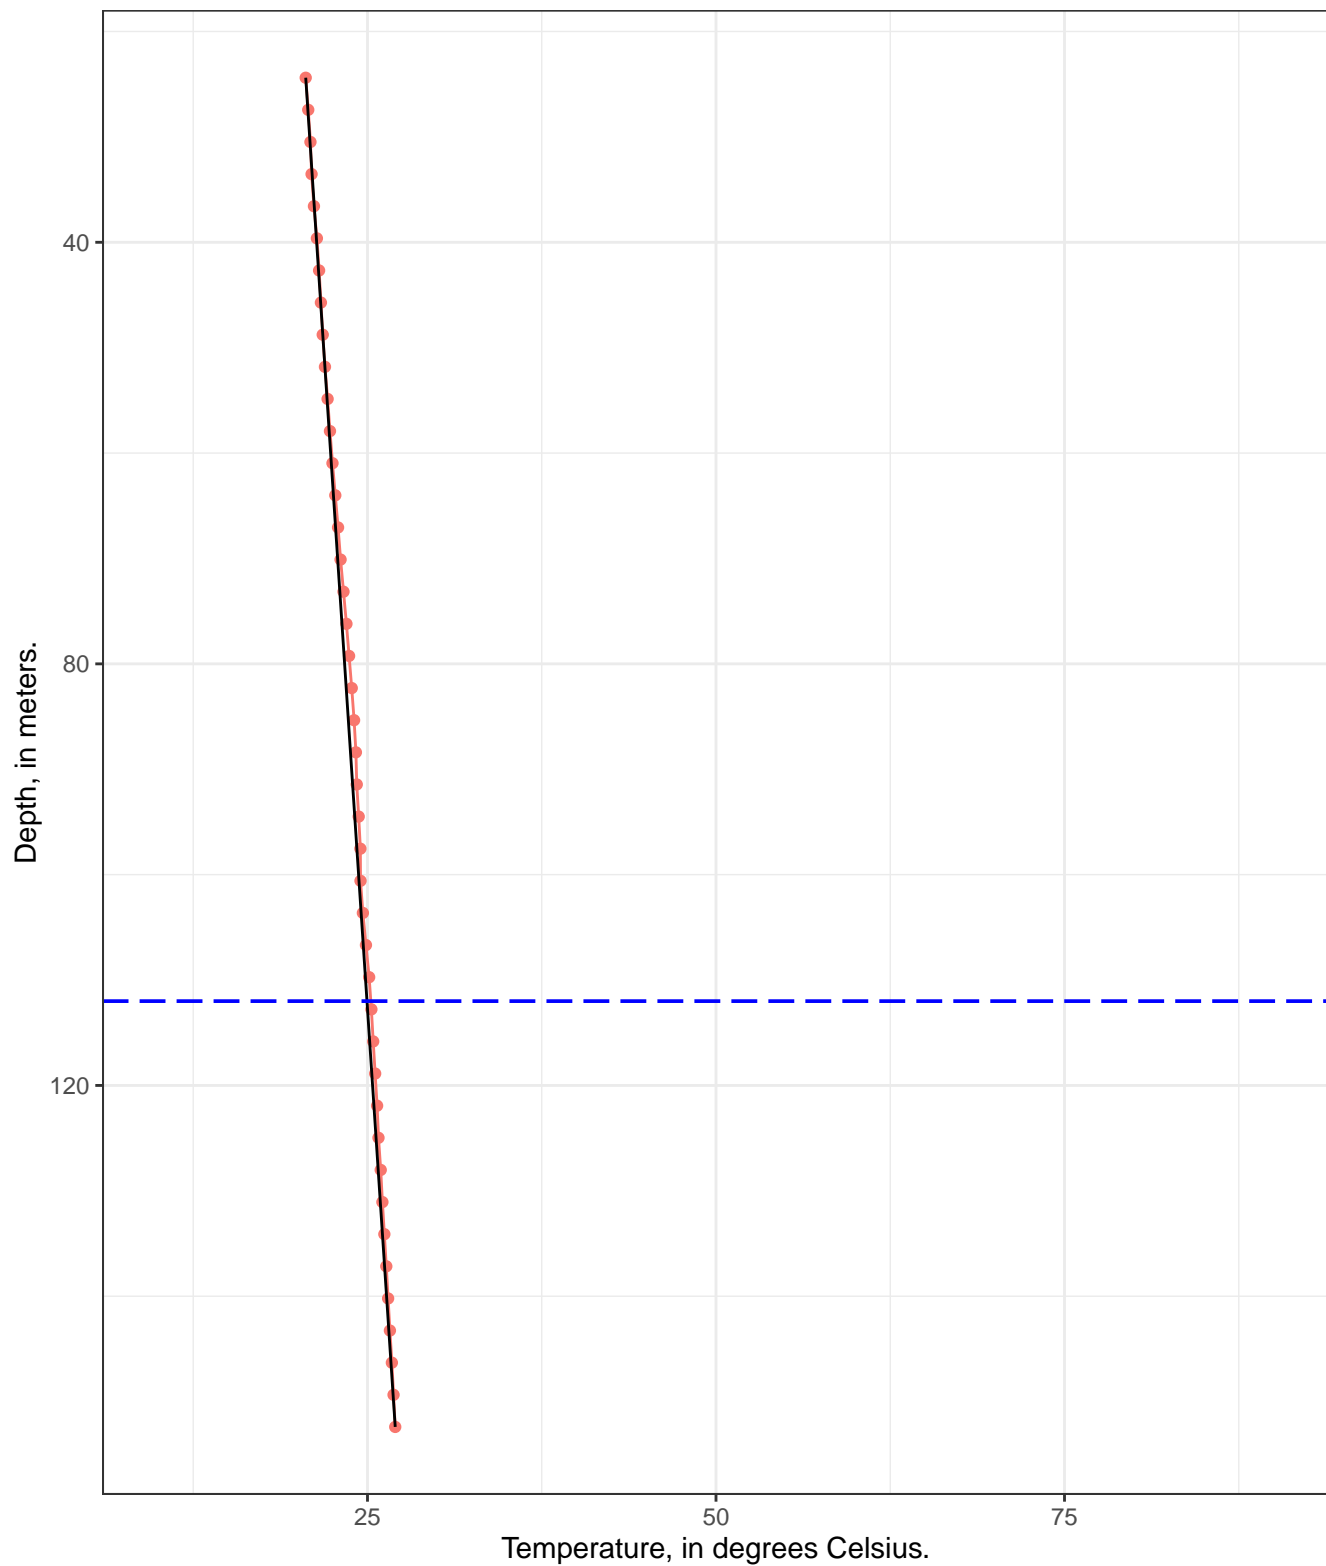

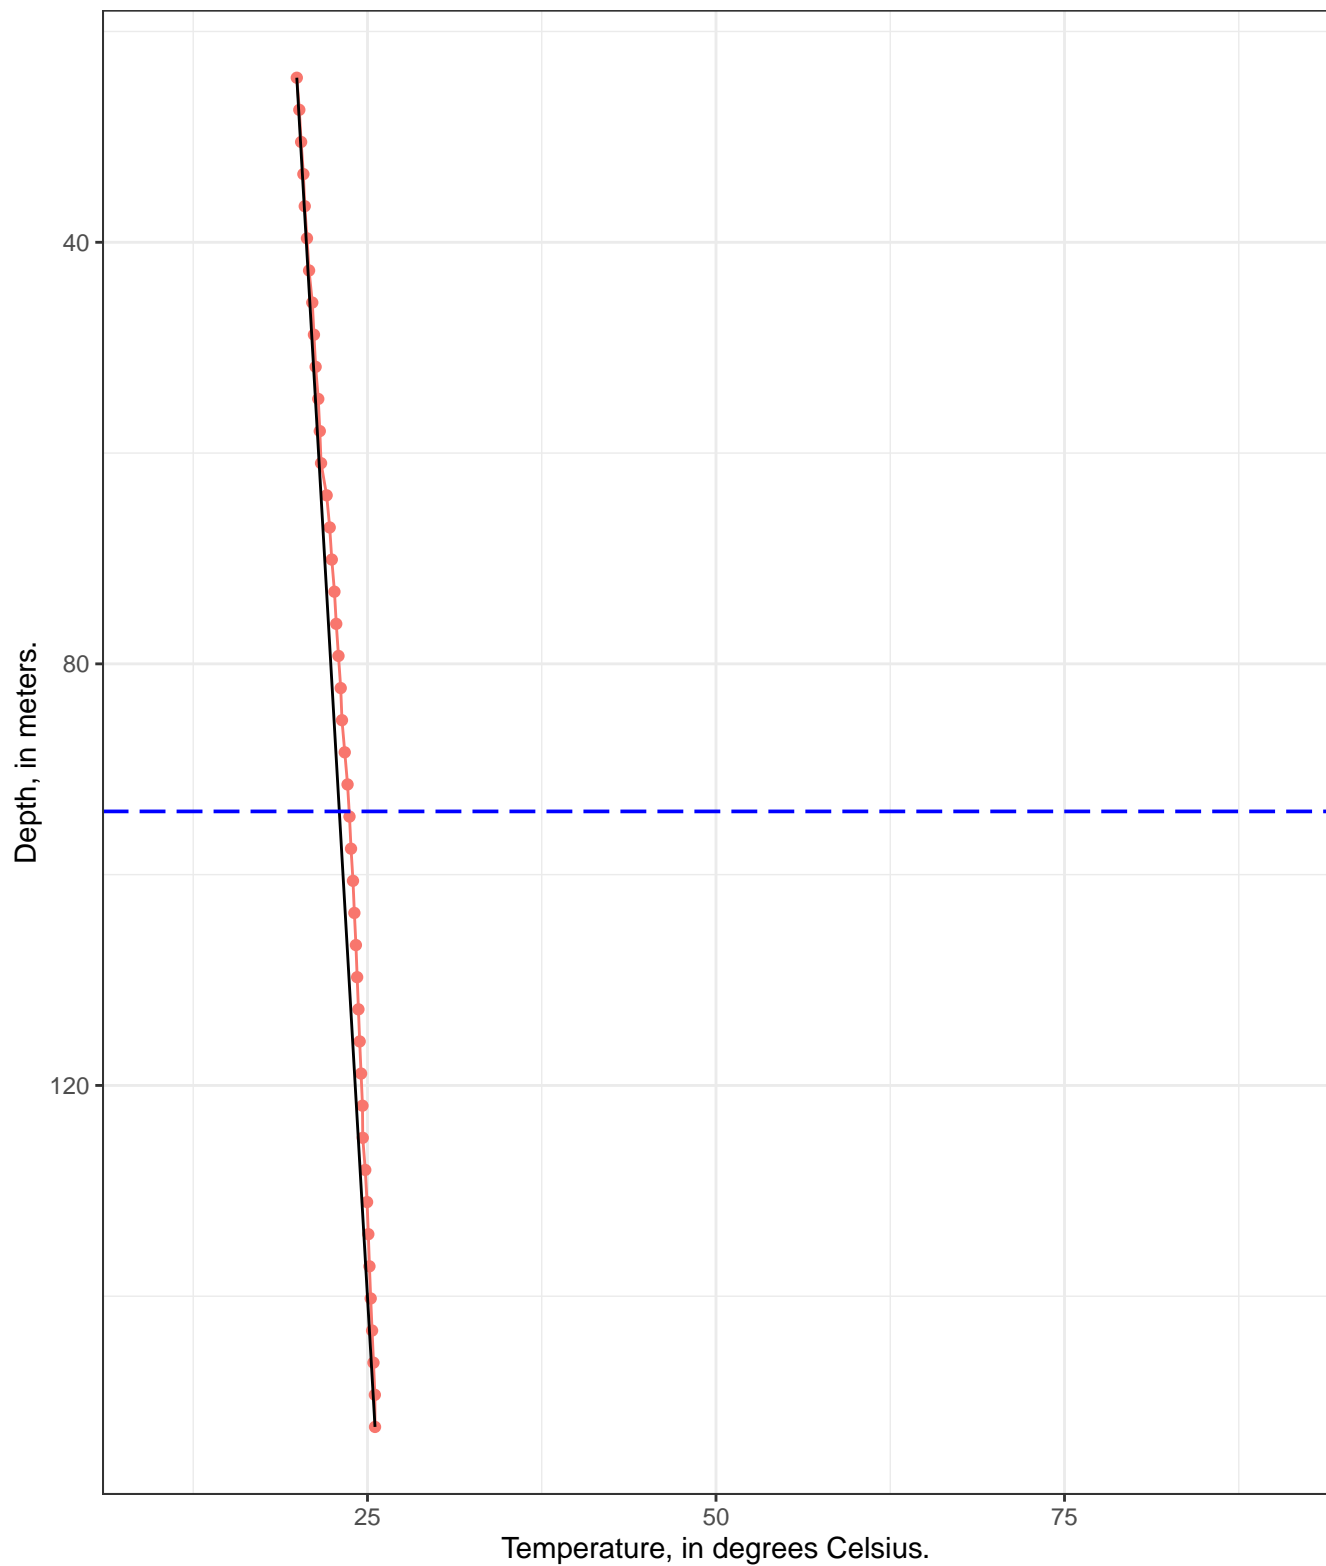

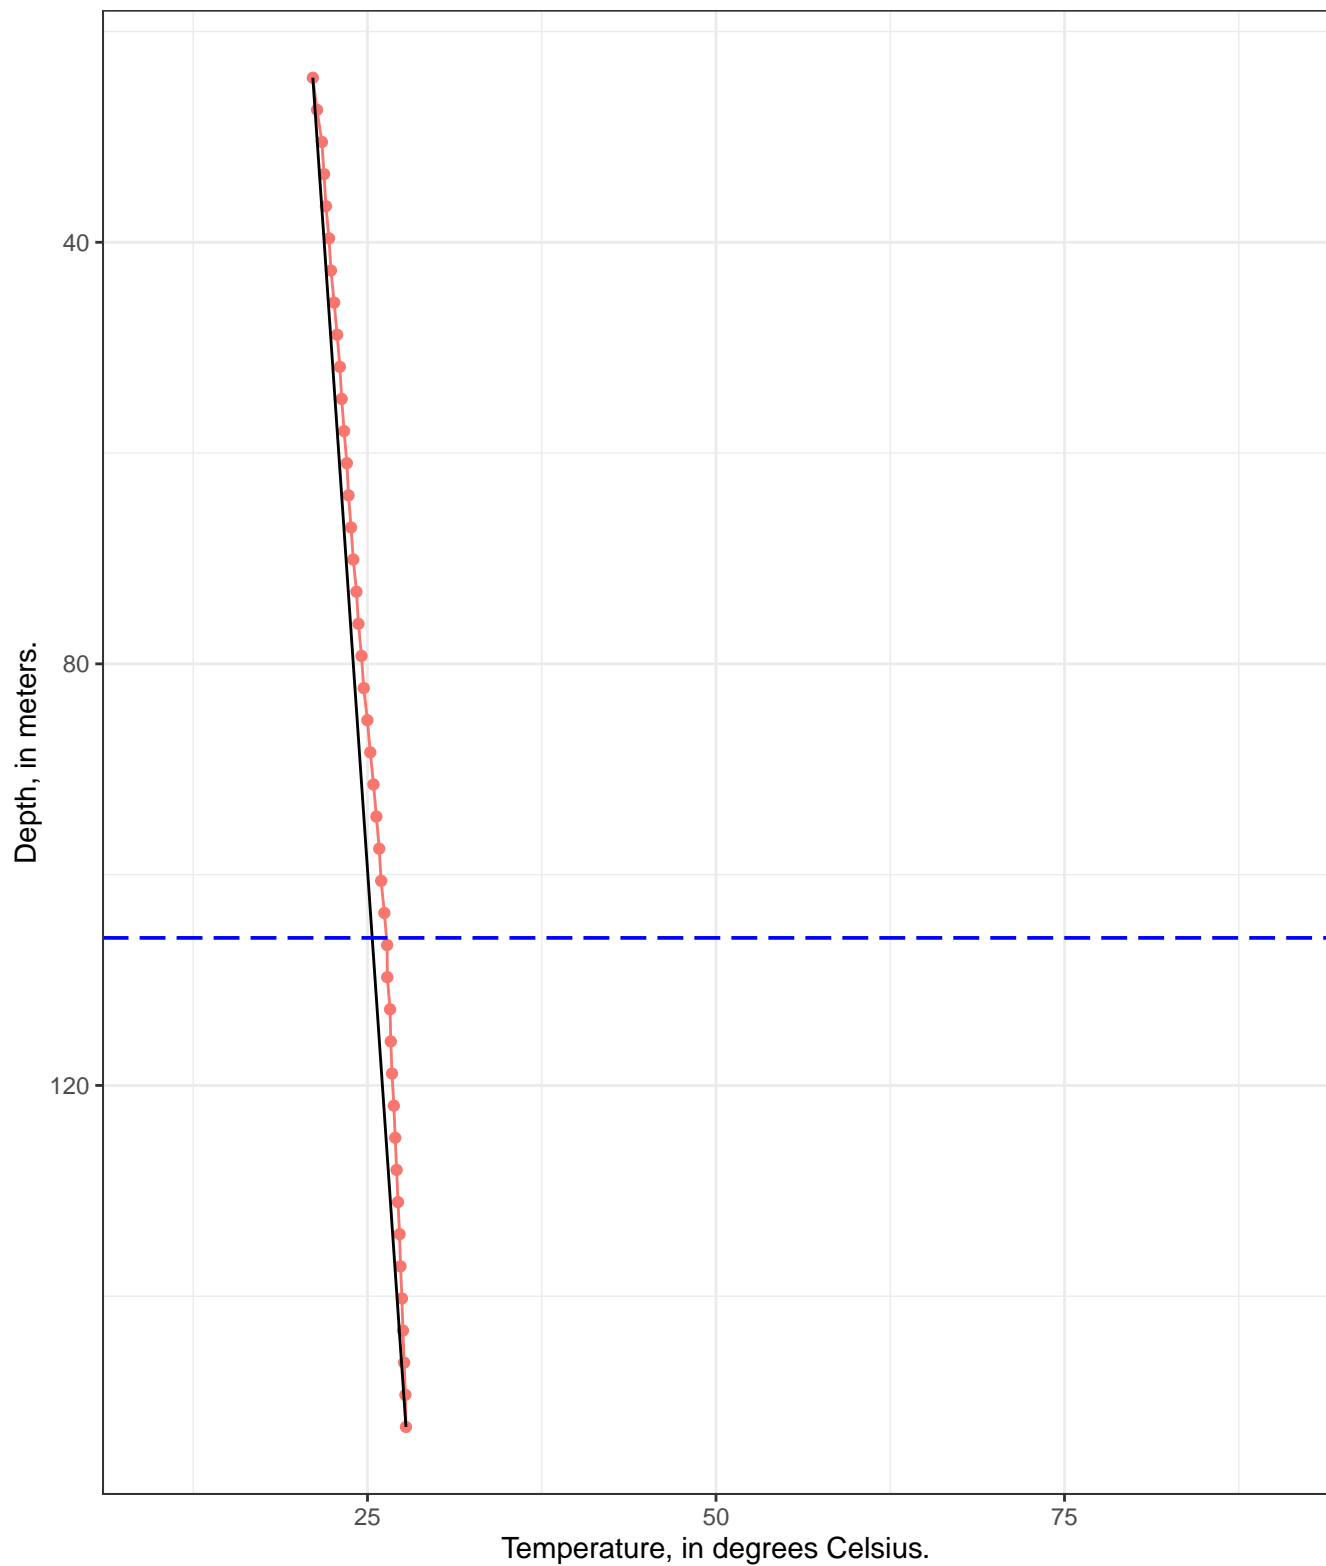

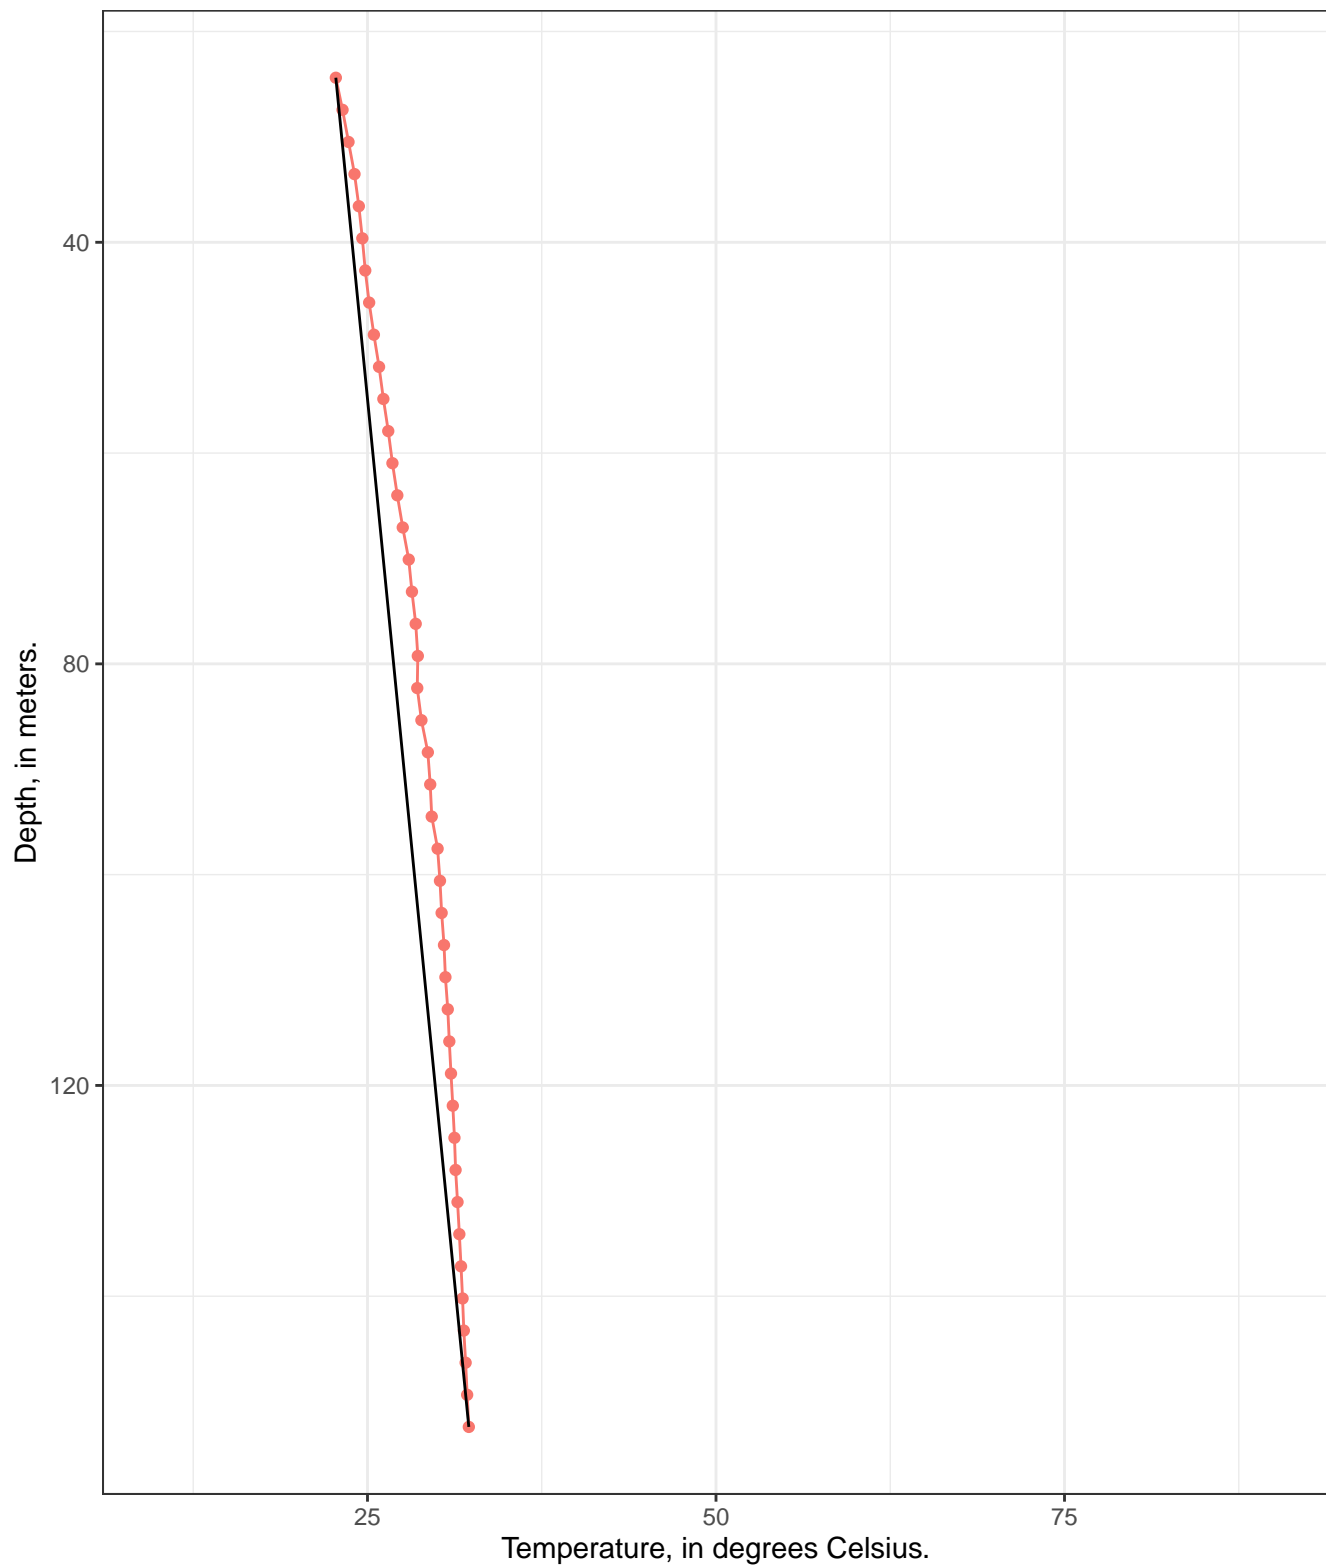

Measurement date —●— 1980-05-05



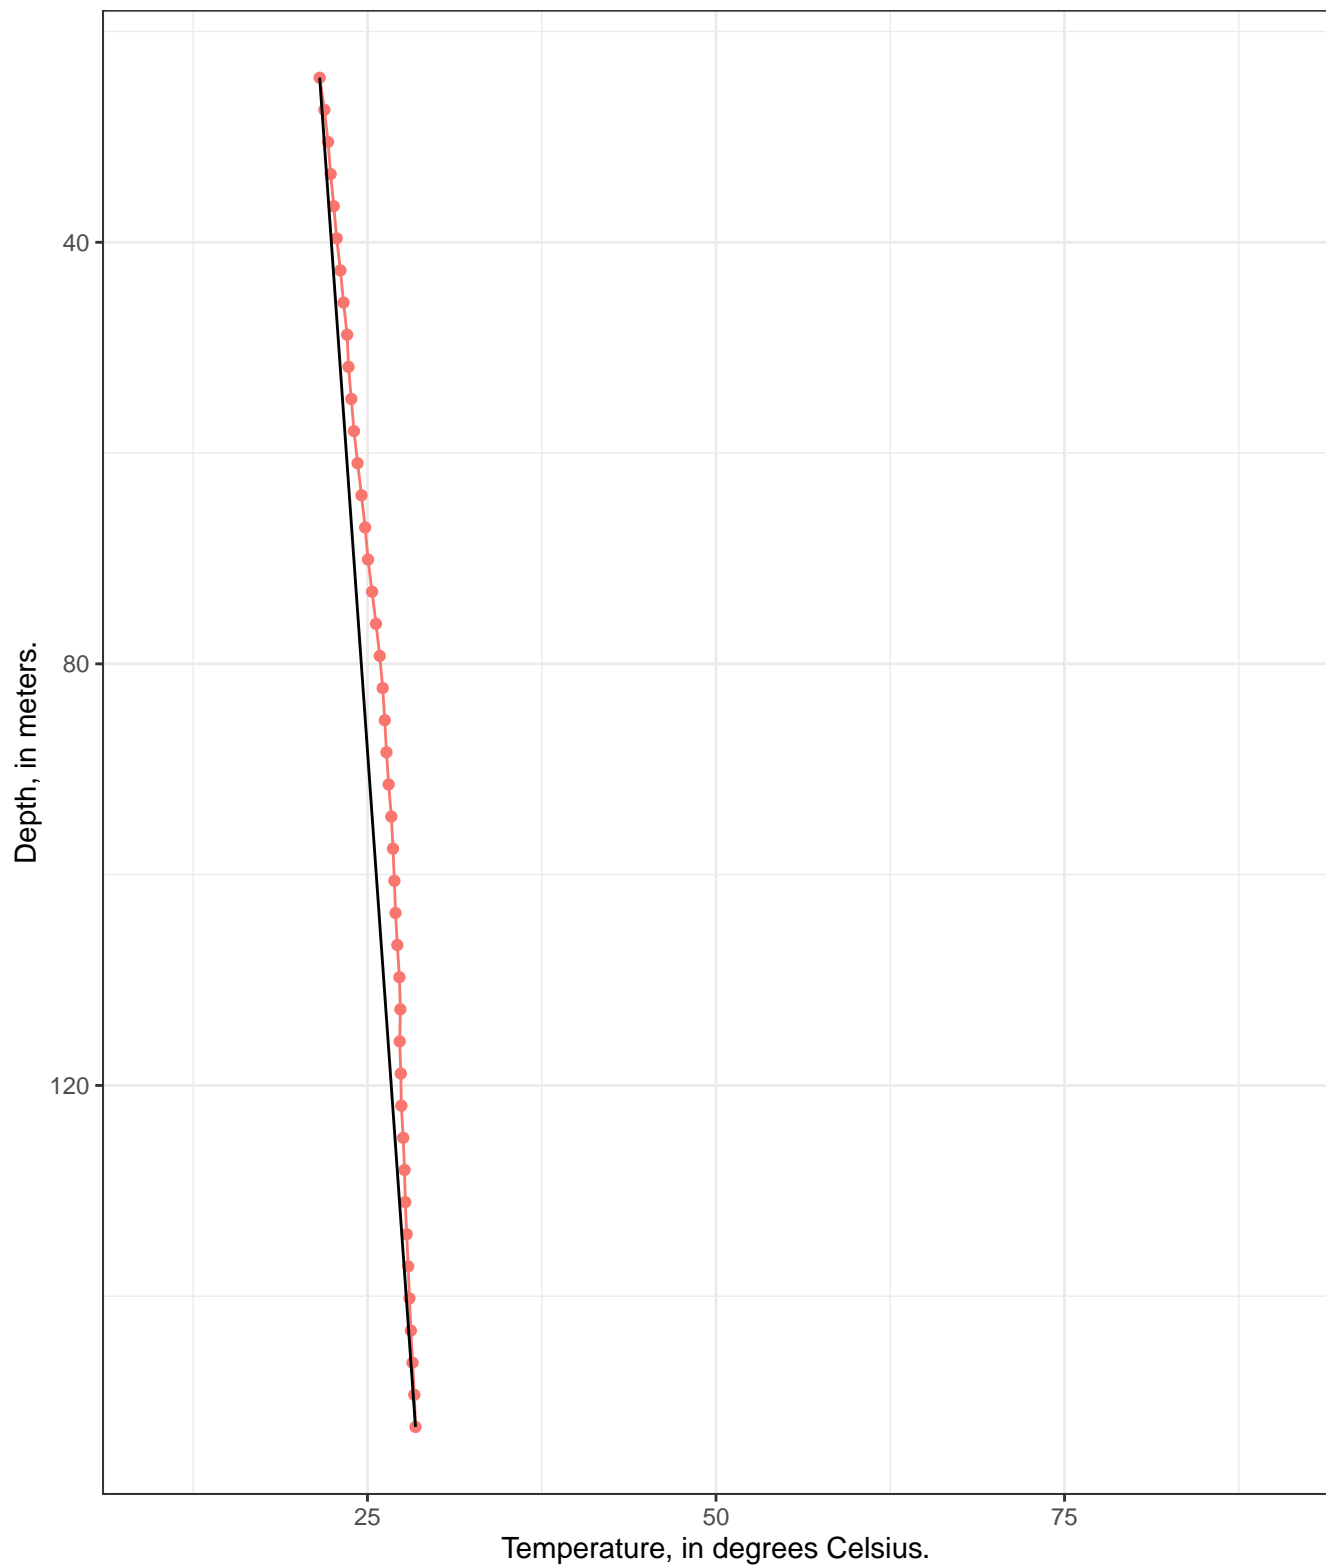

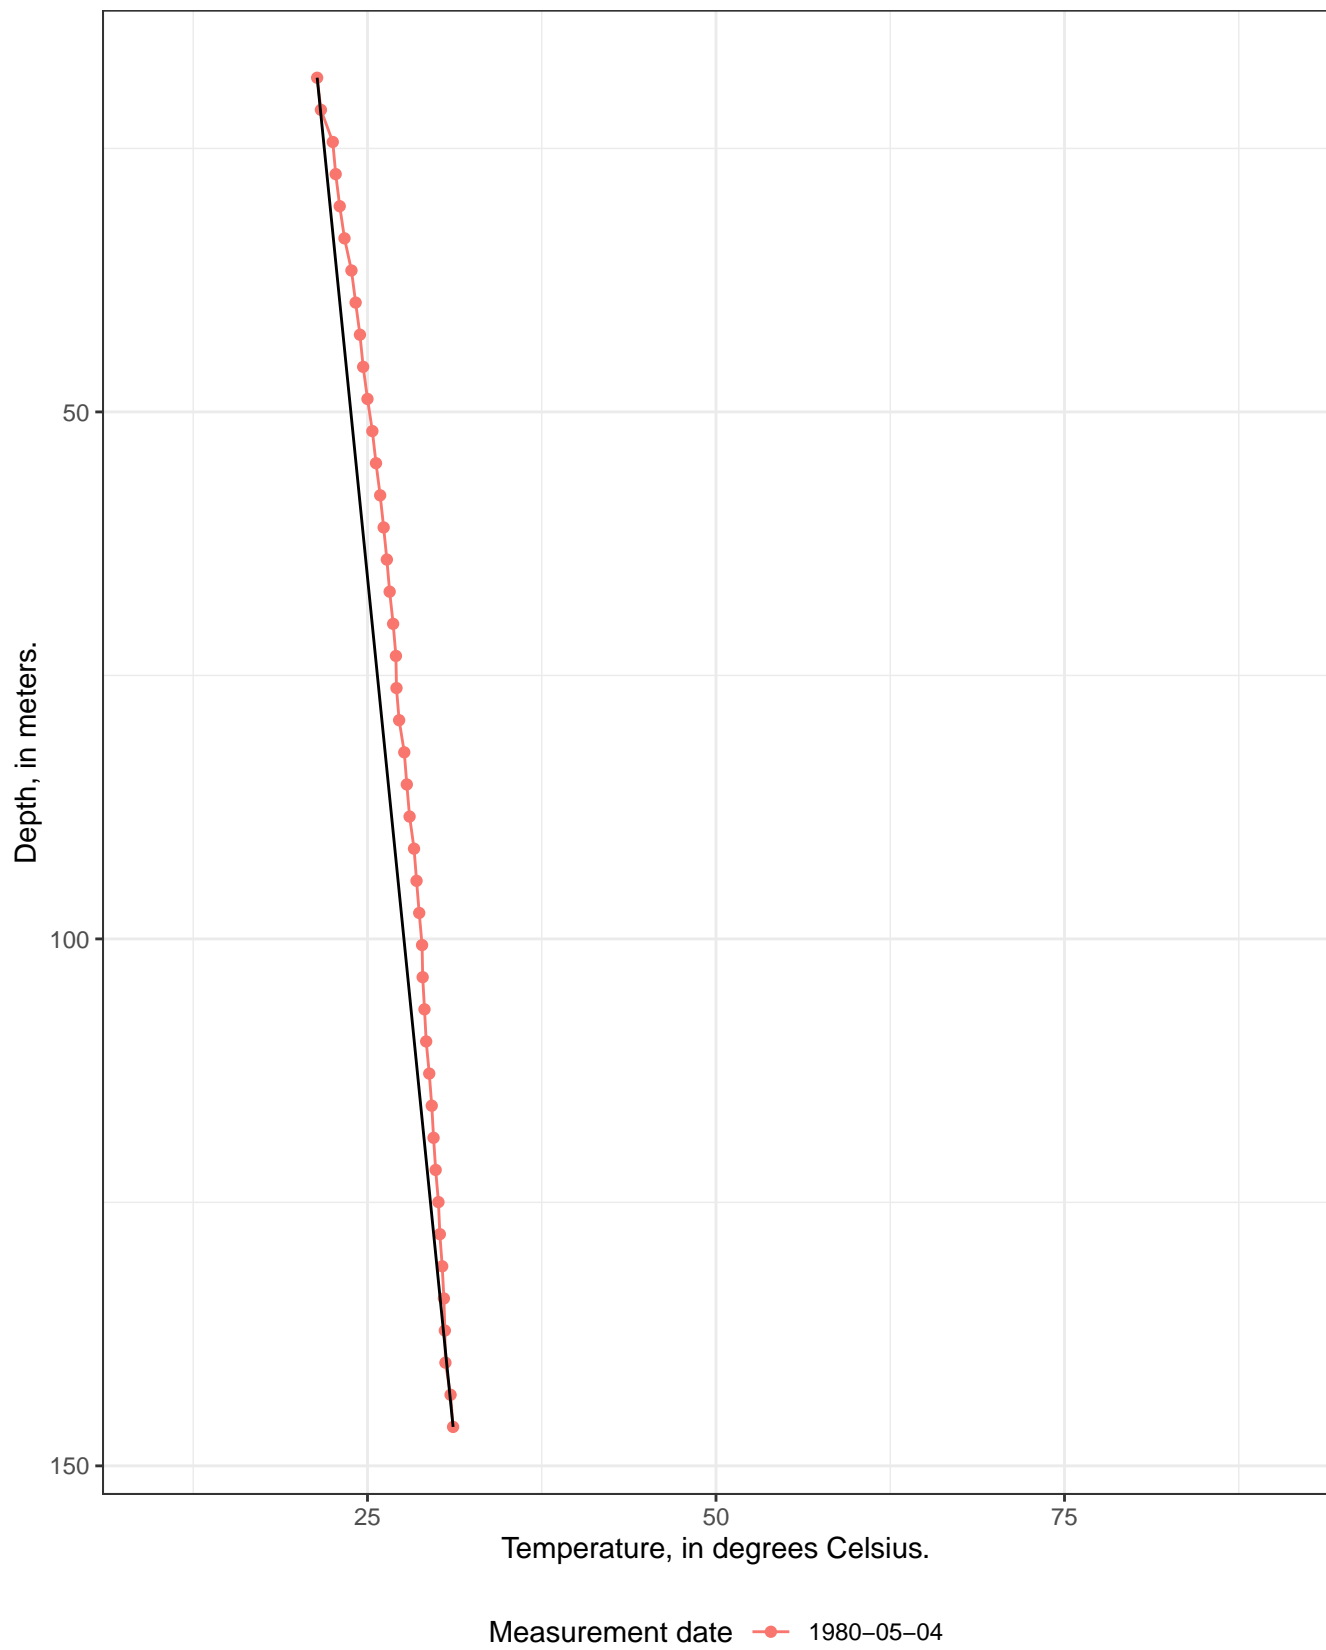

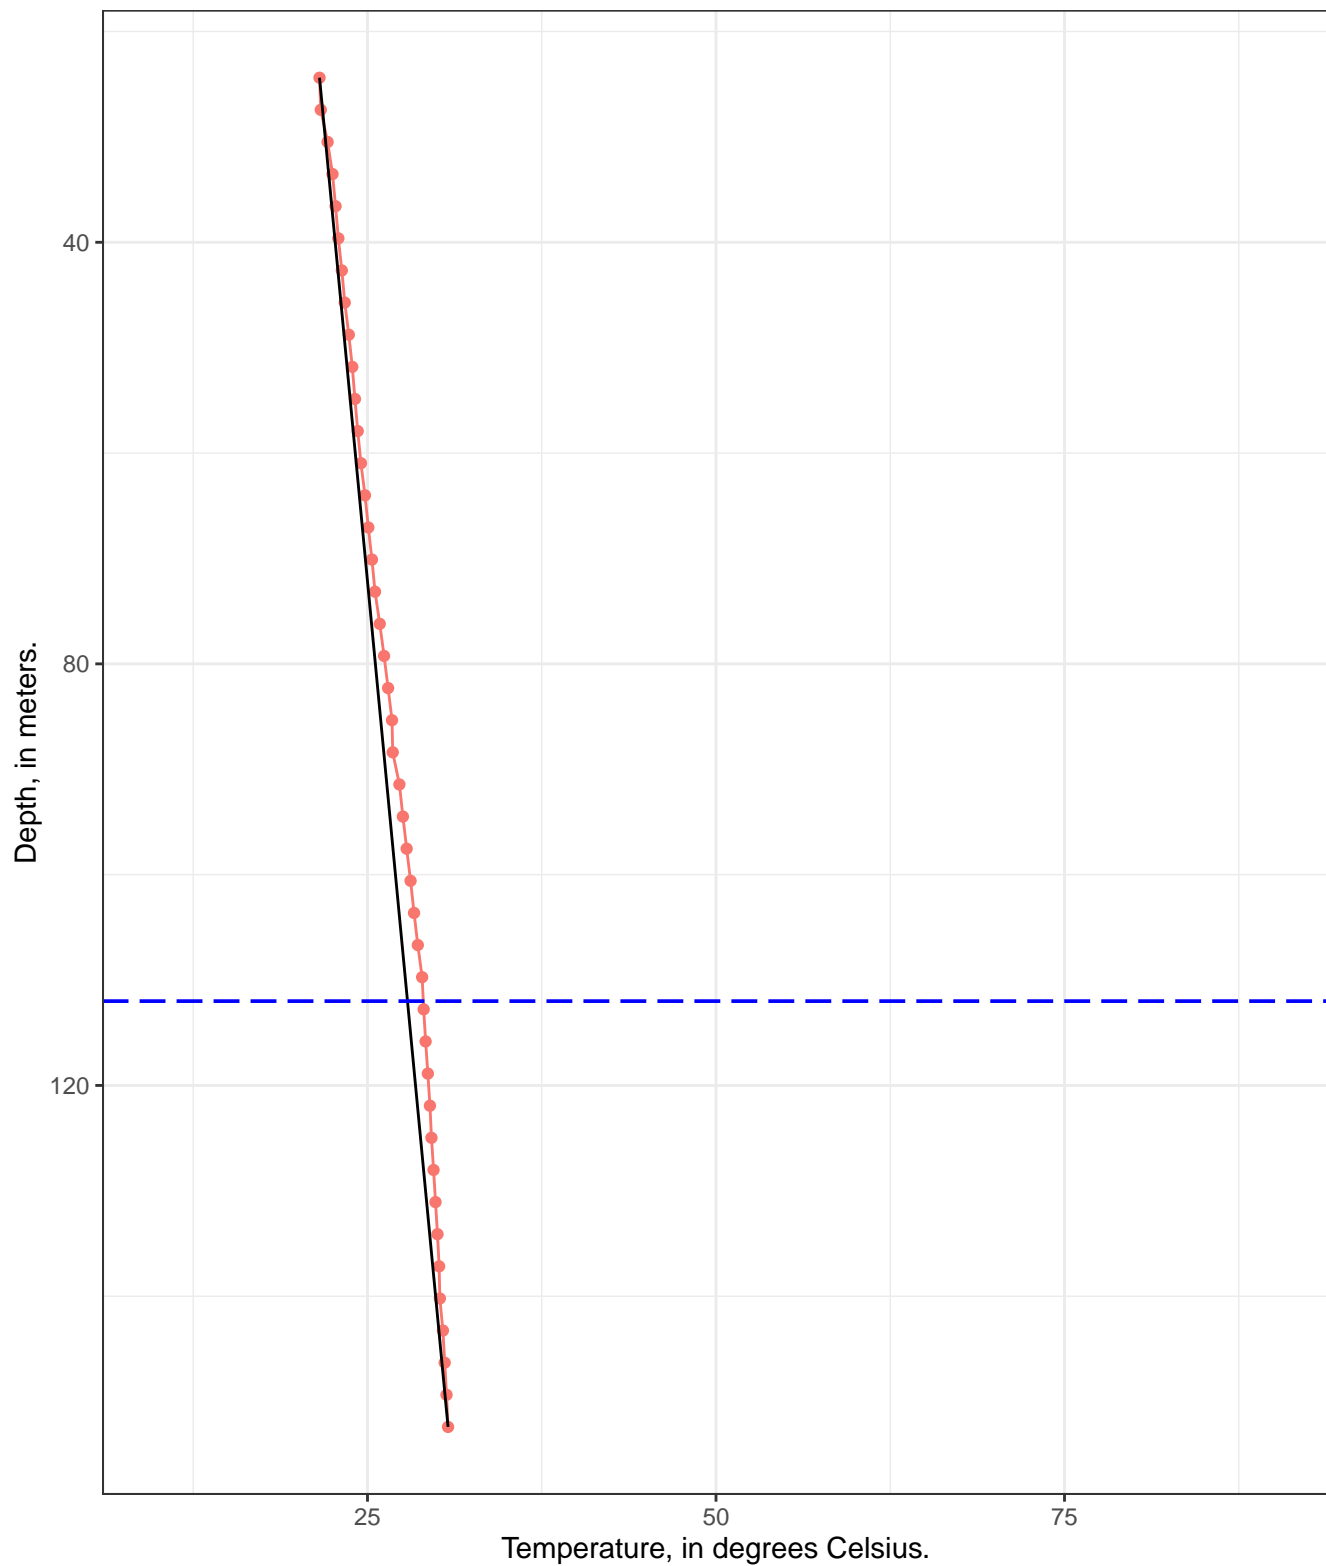

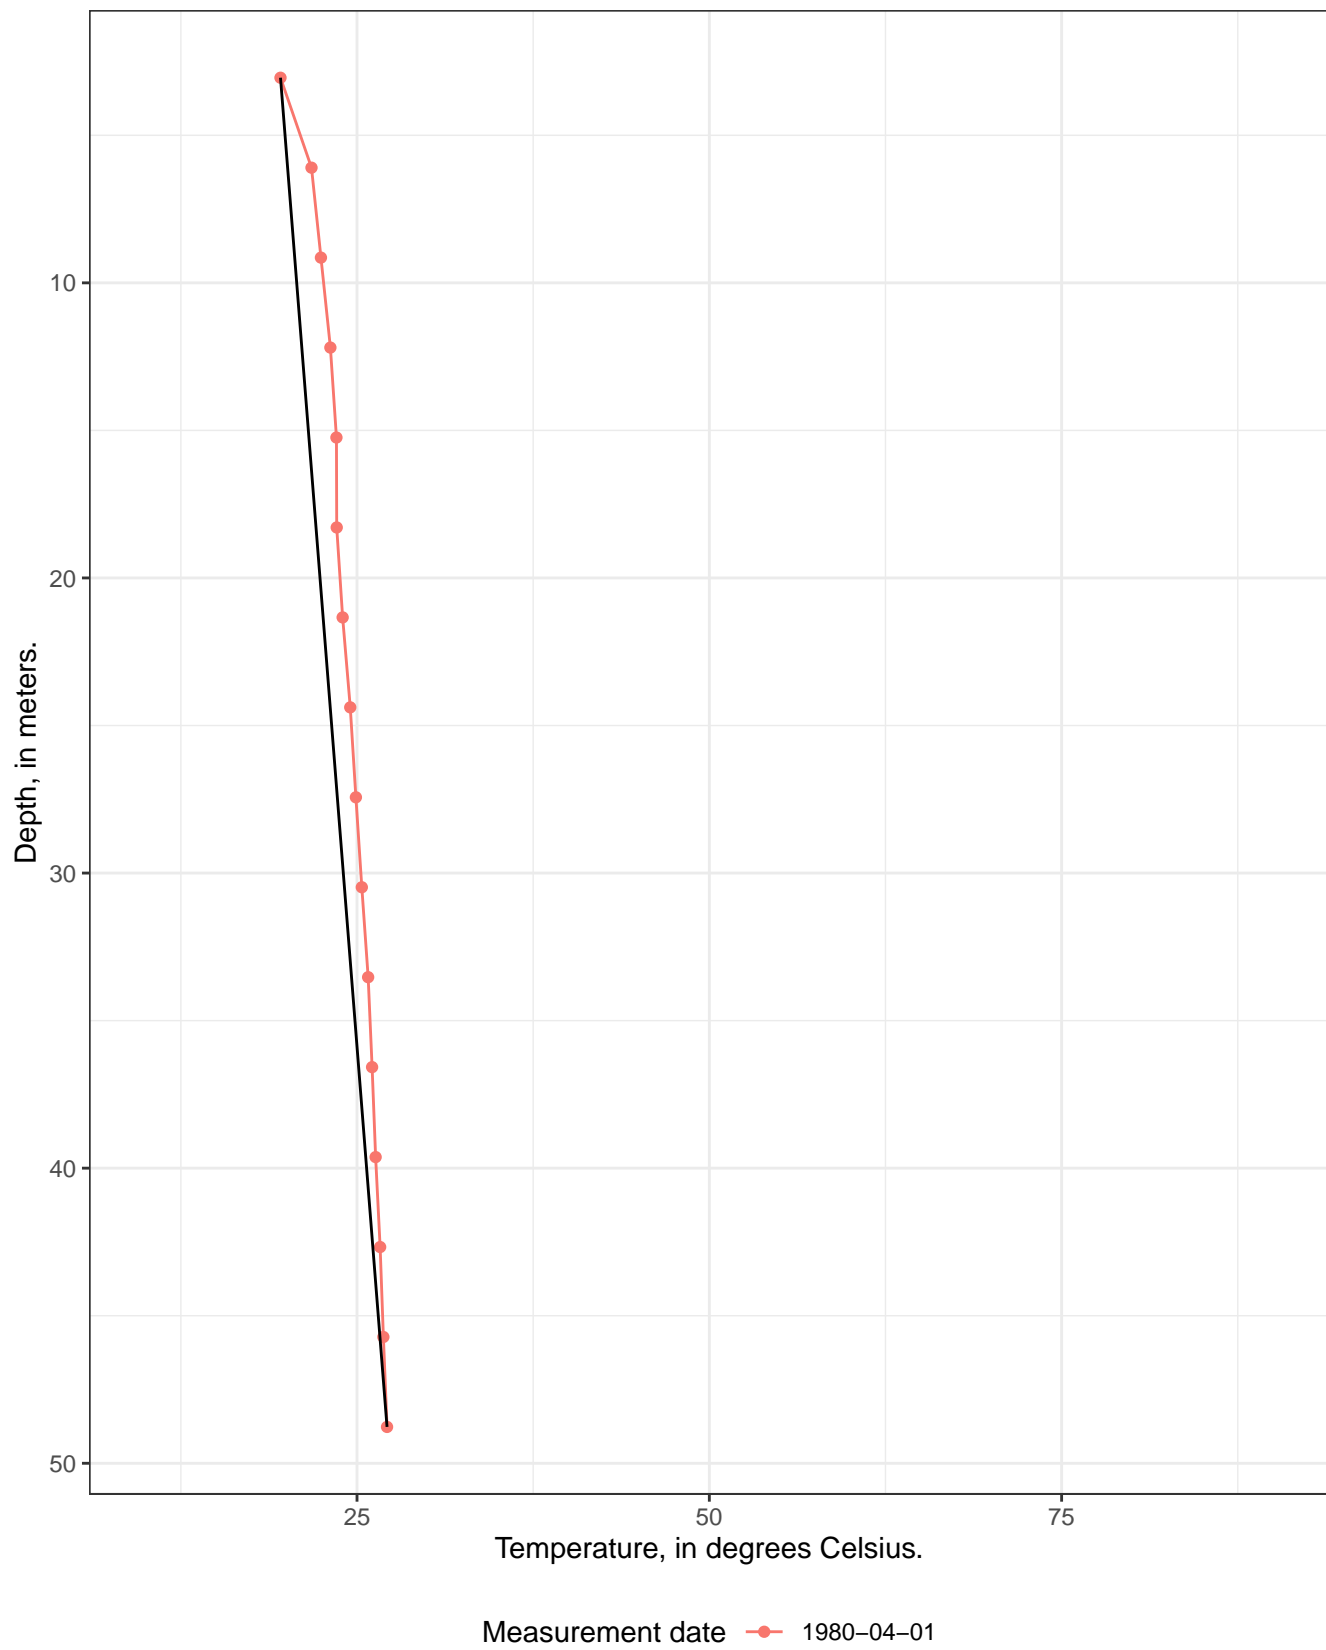

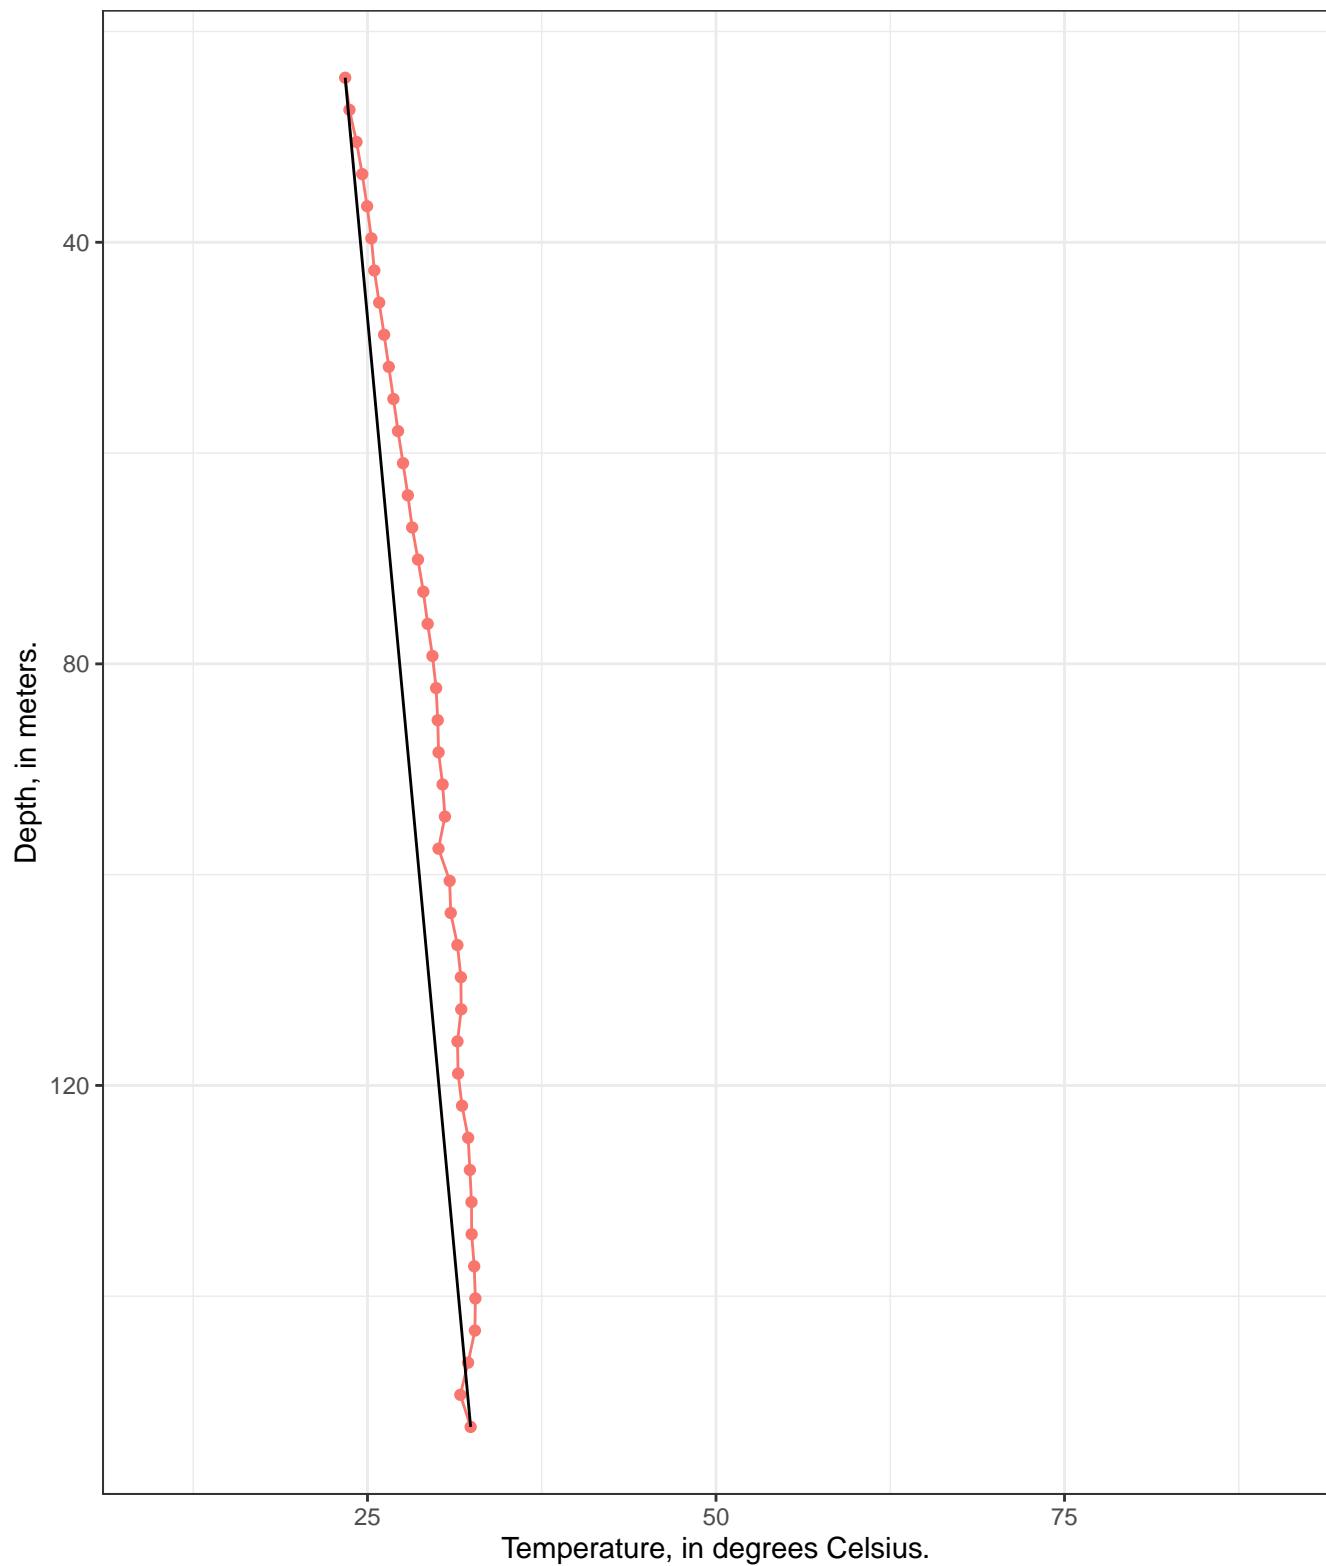

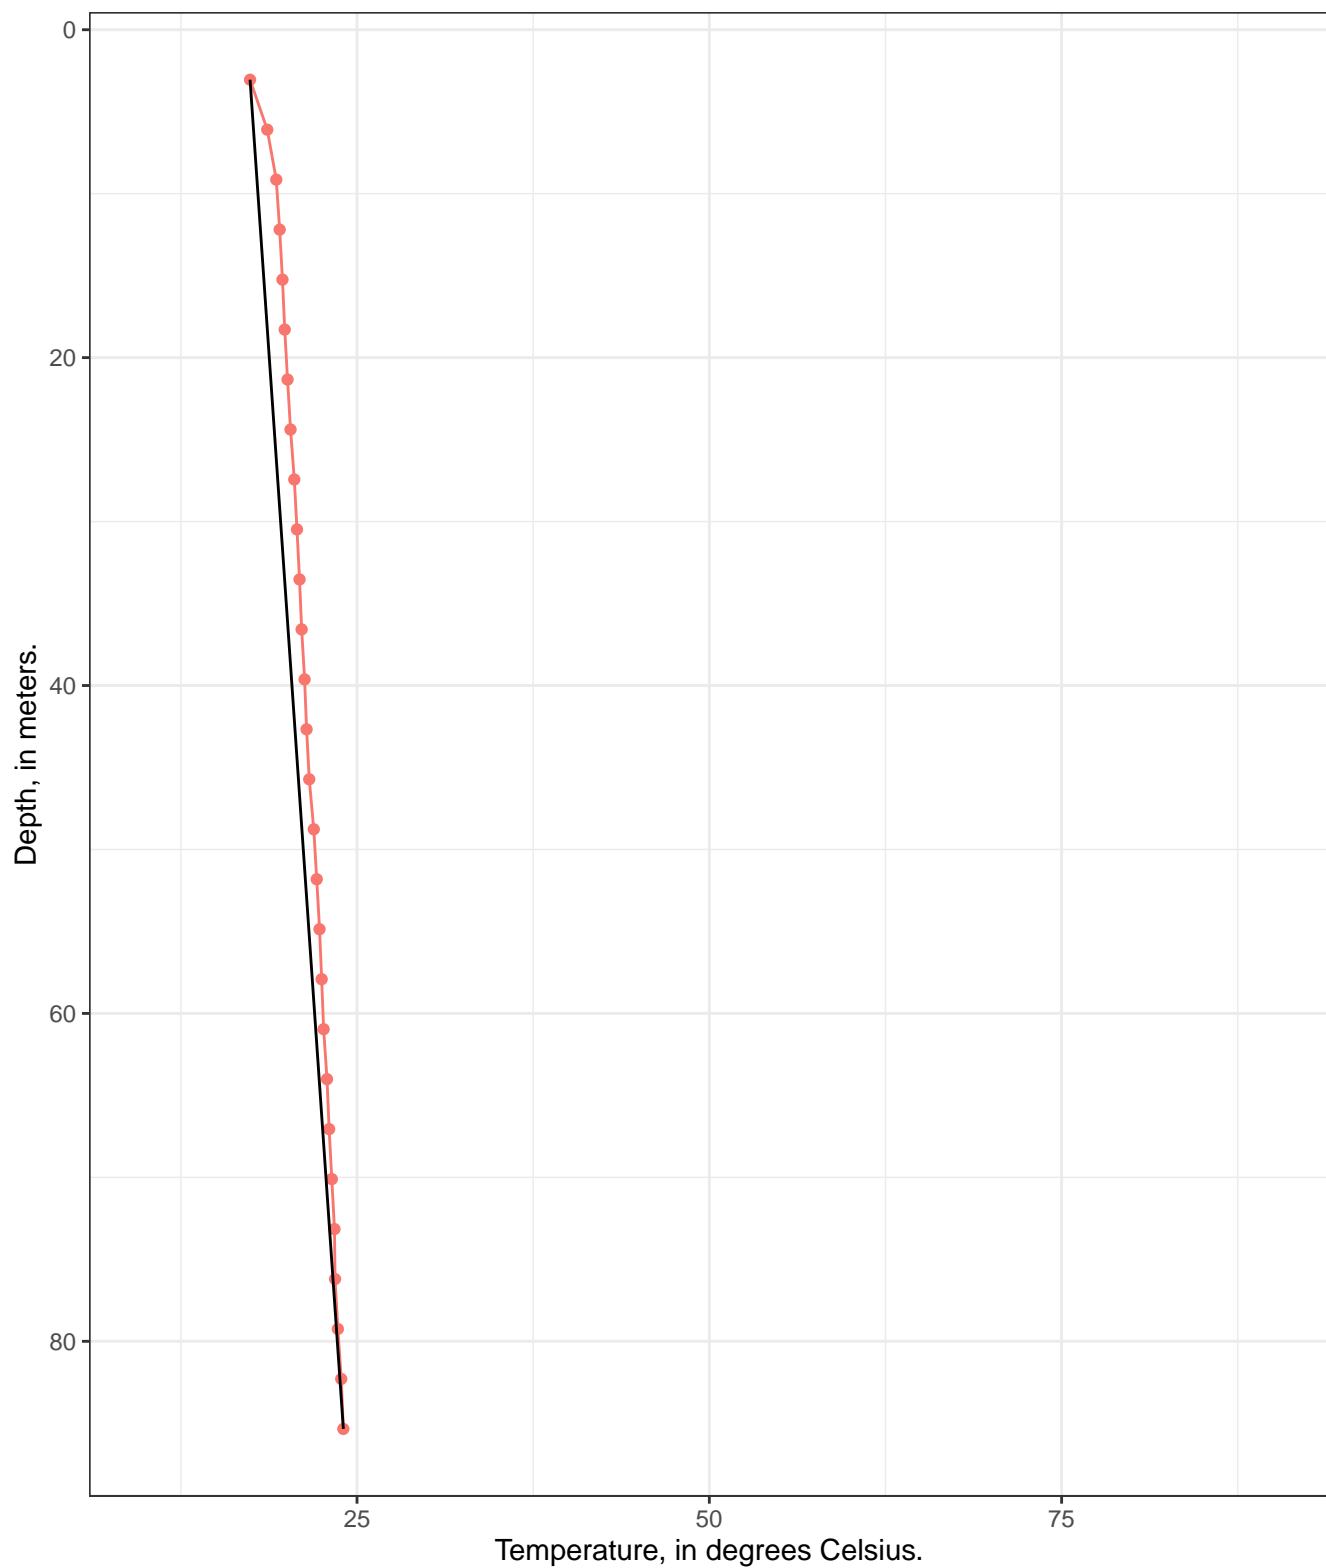

Measurement date 1980-05-05

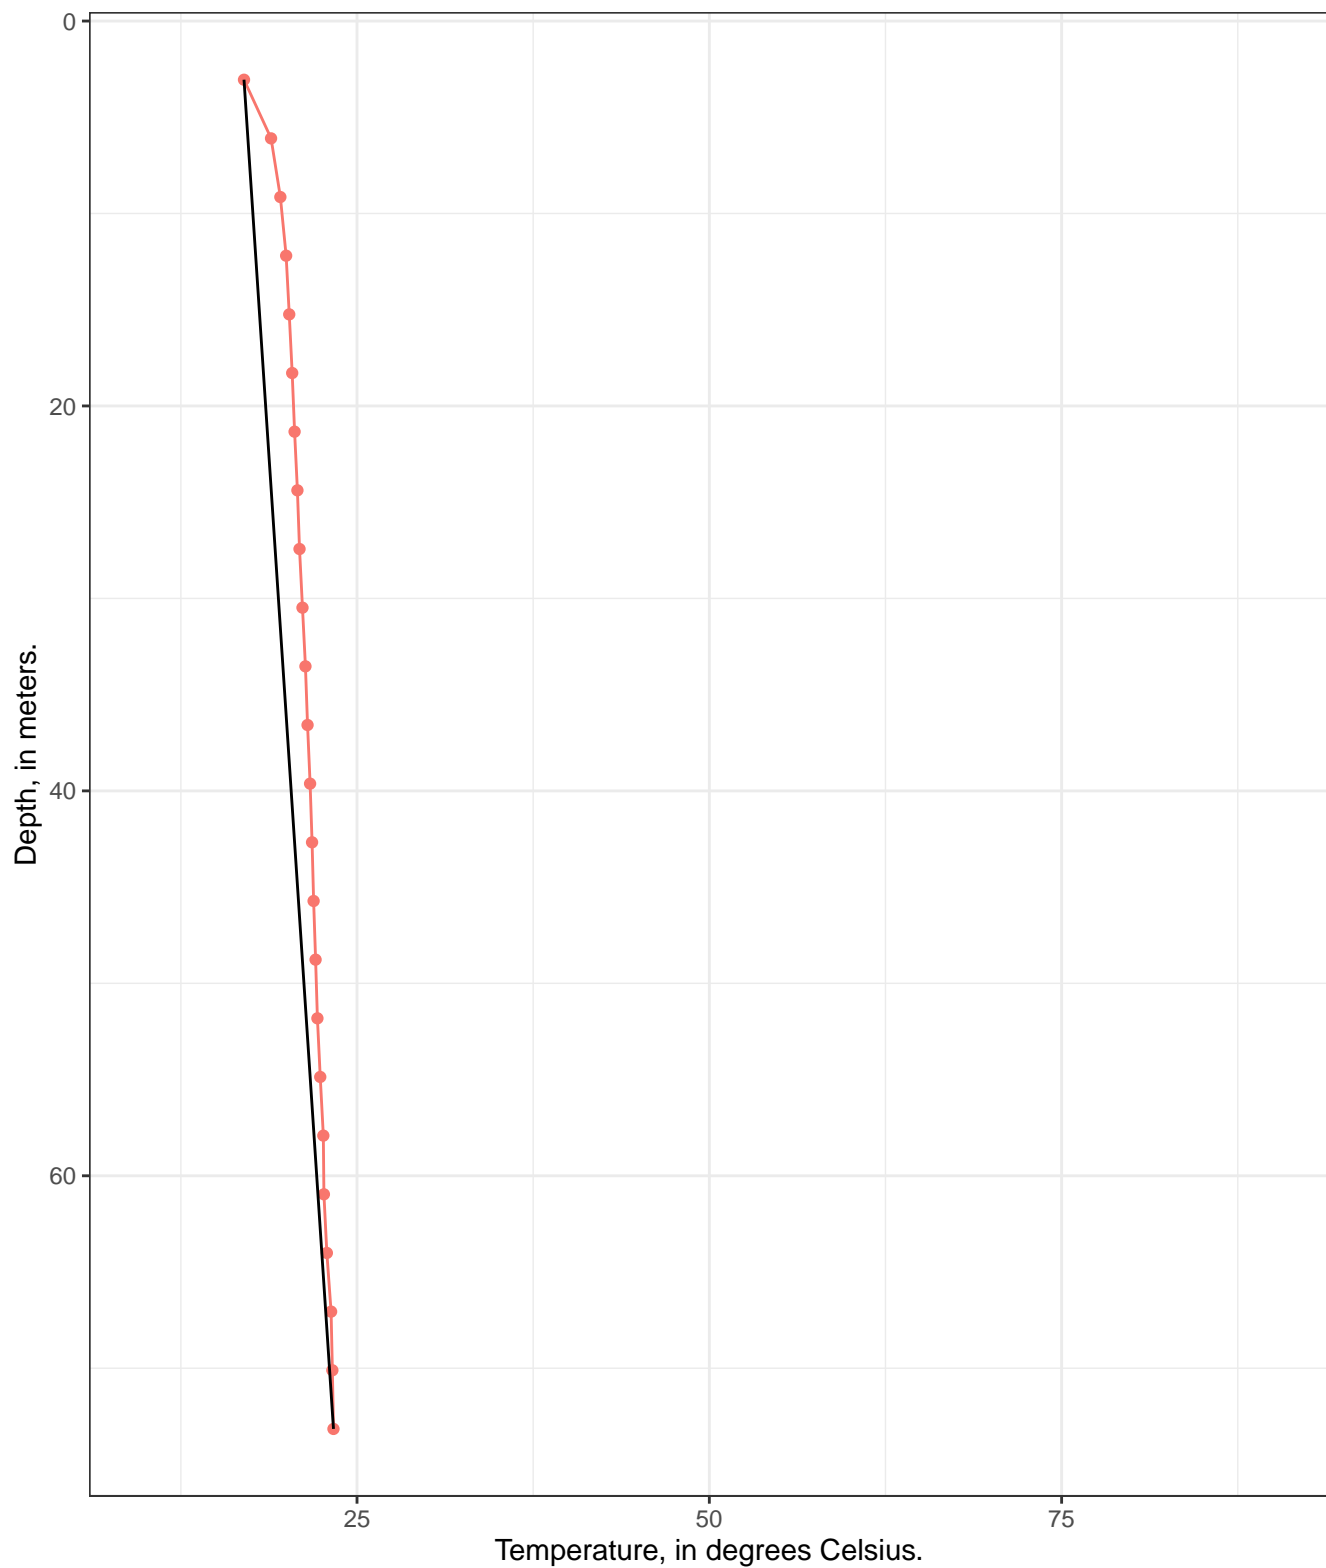

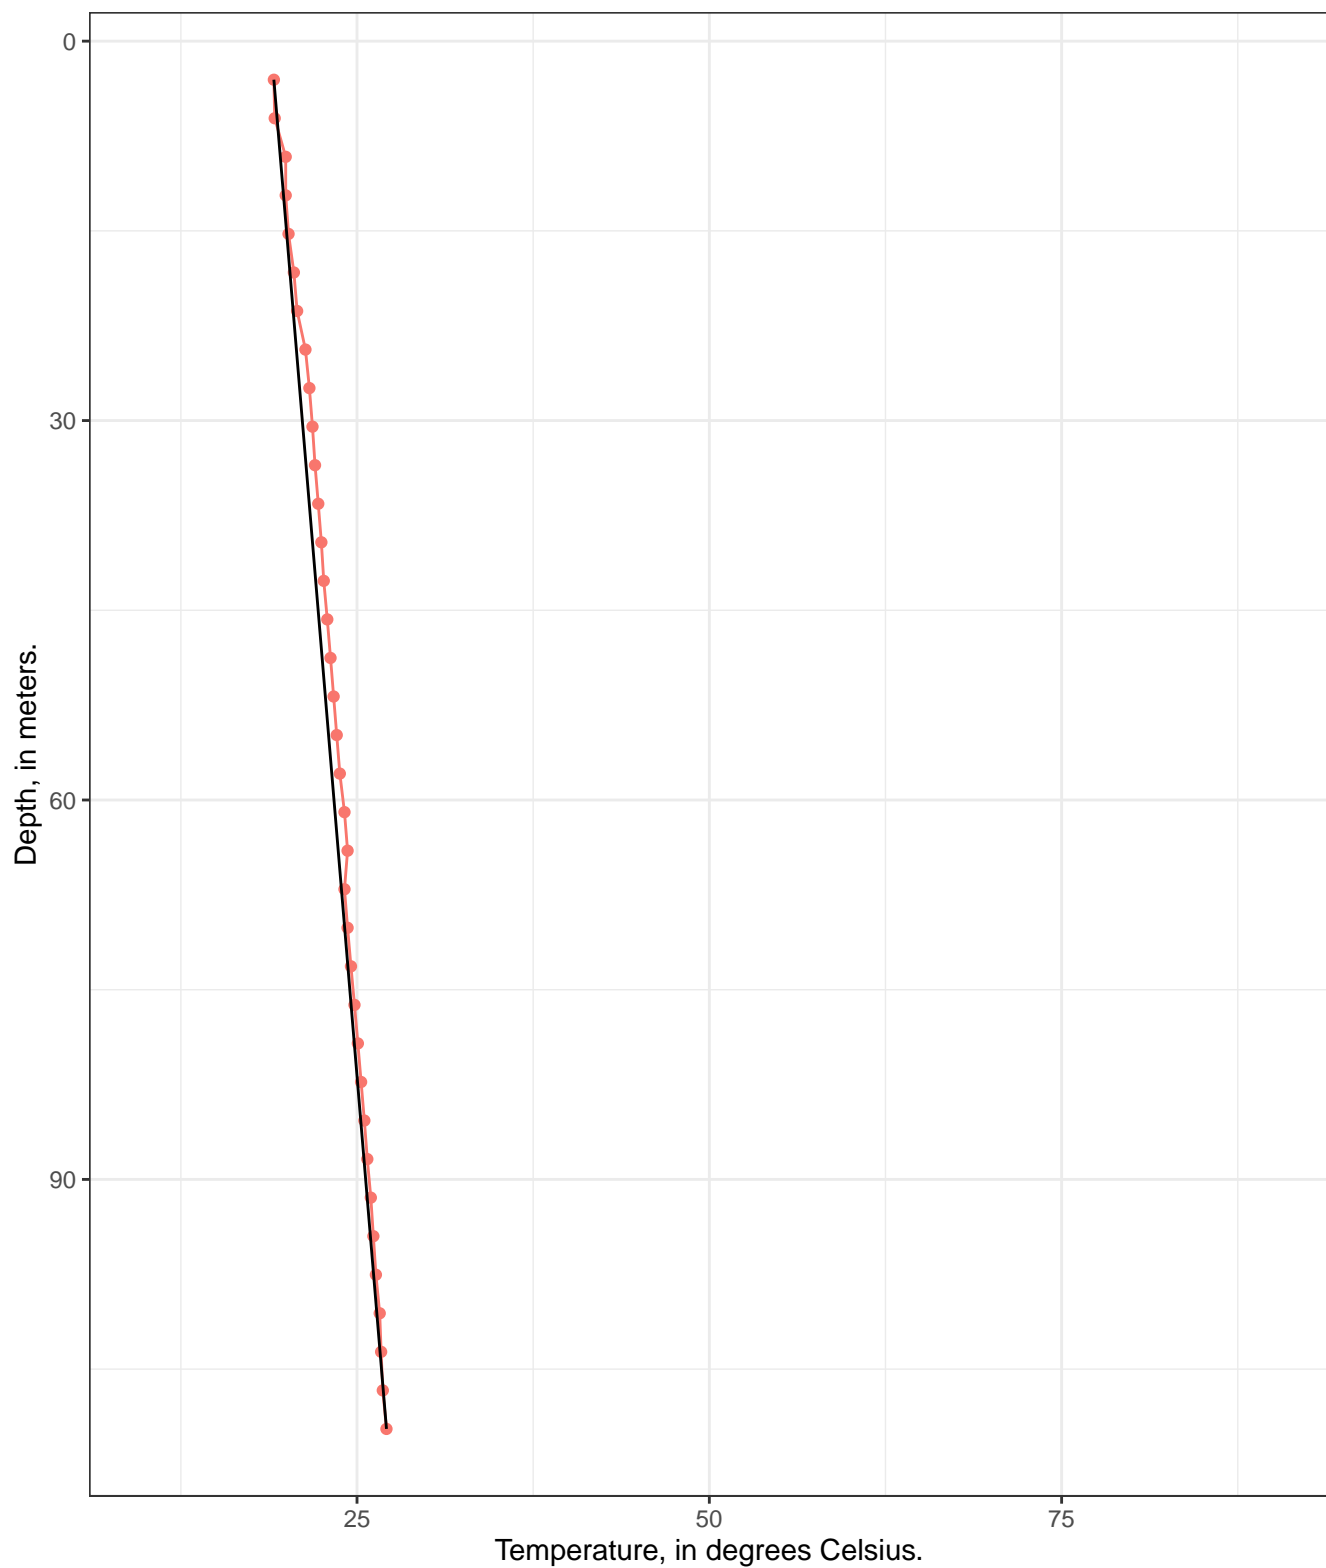



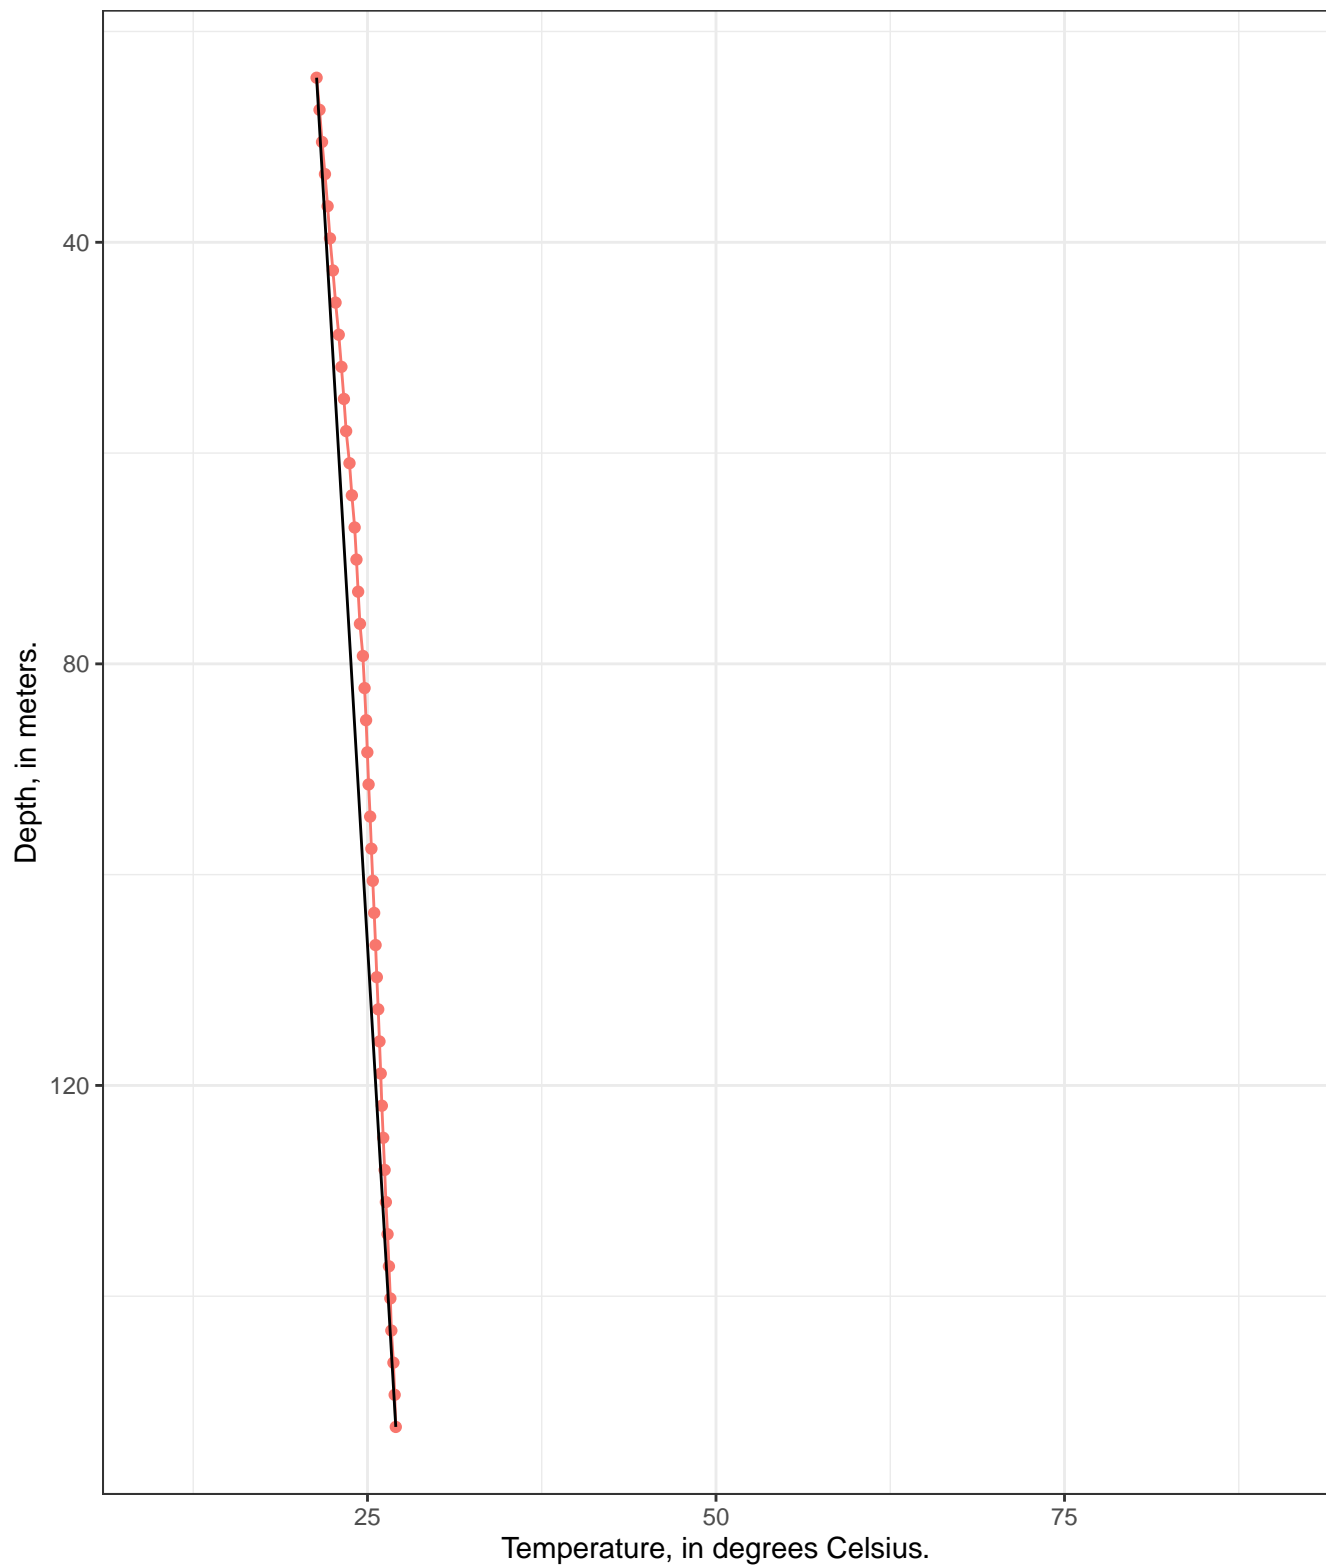

ID: 153 [H-4-80-1222\_KILBOURNE\_HOLE]

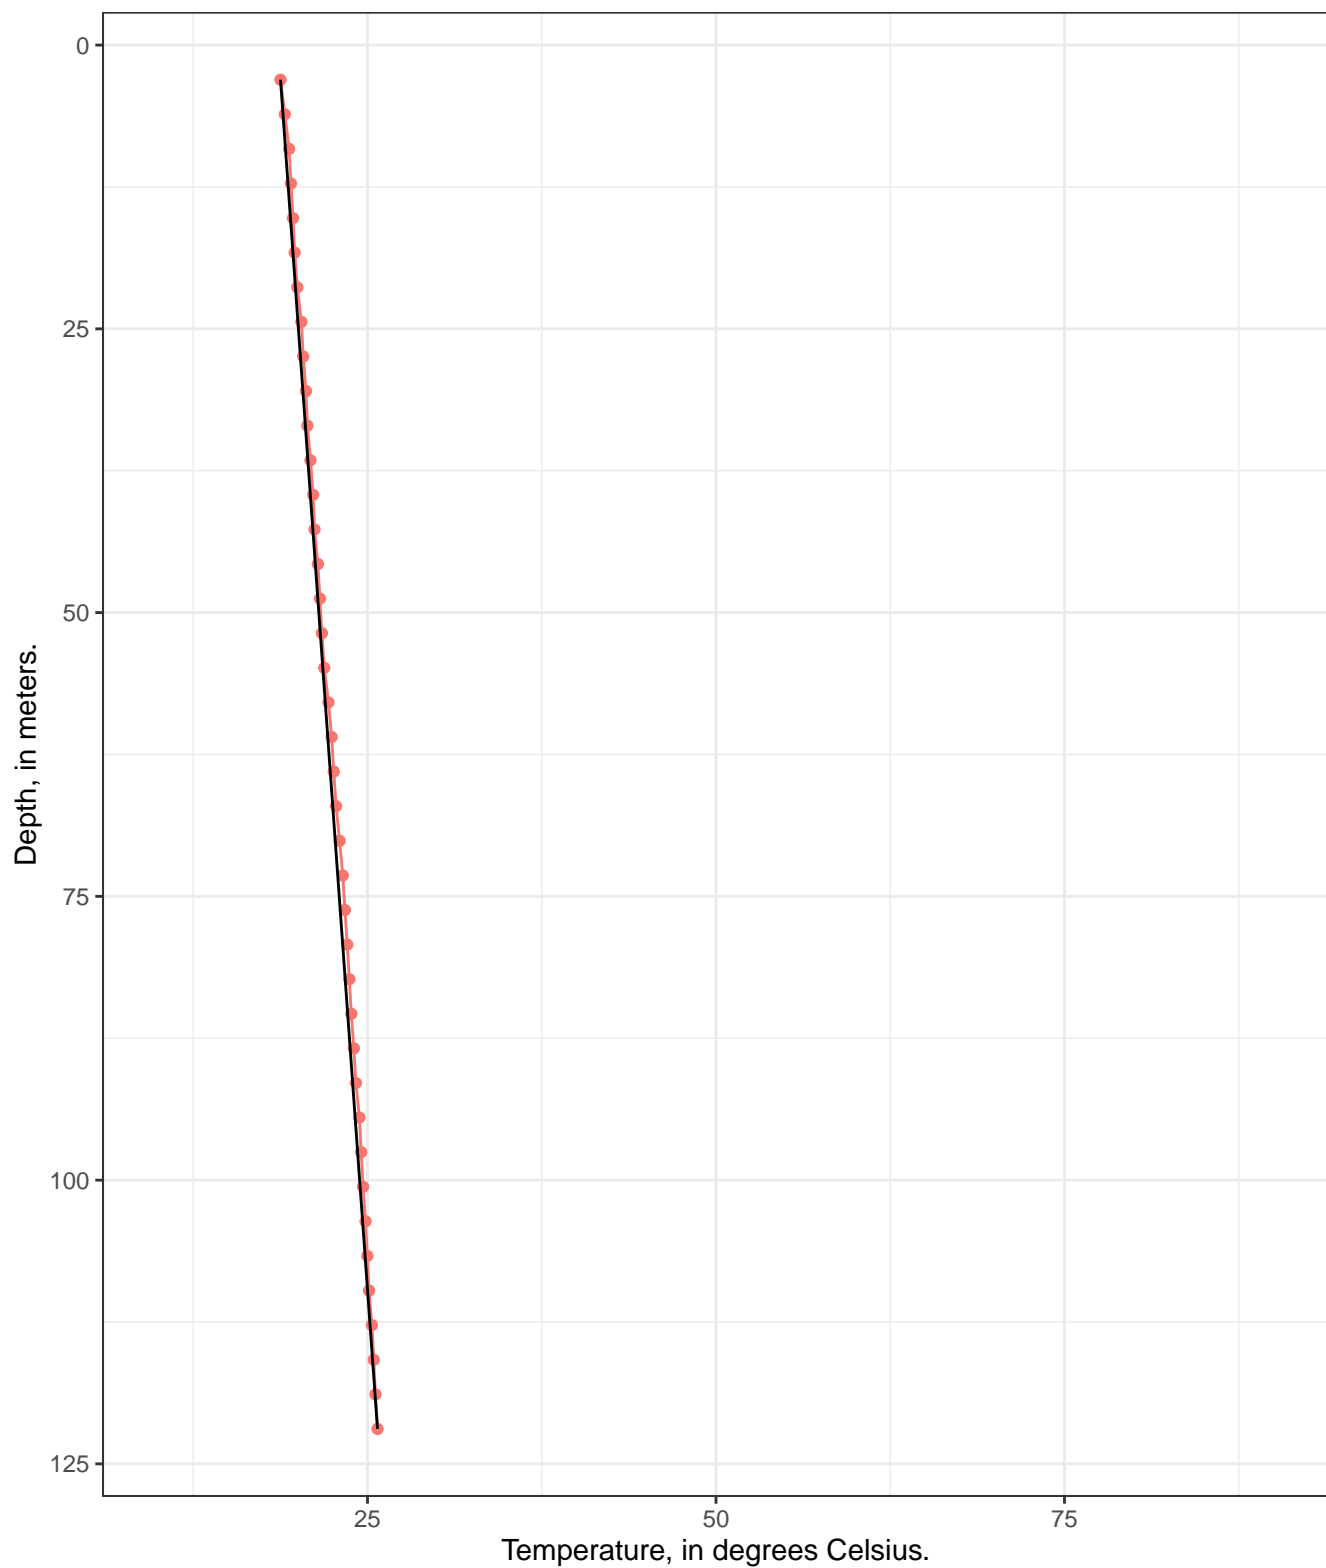

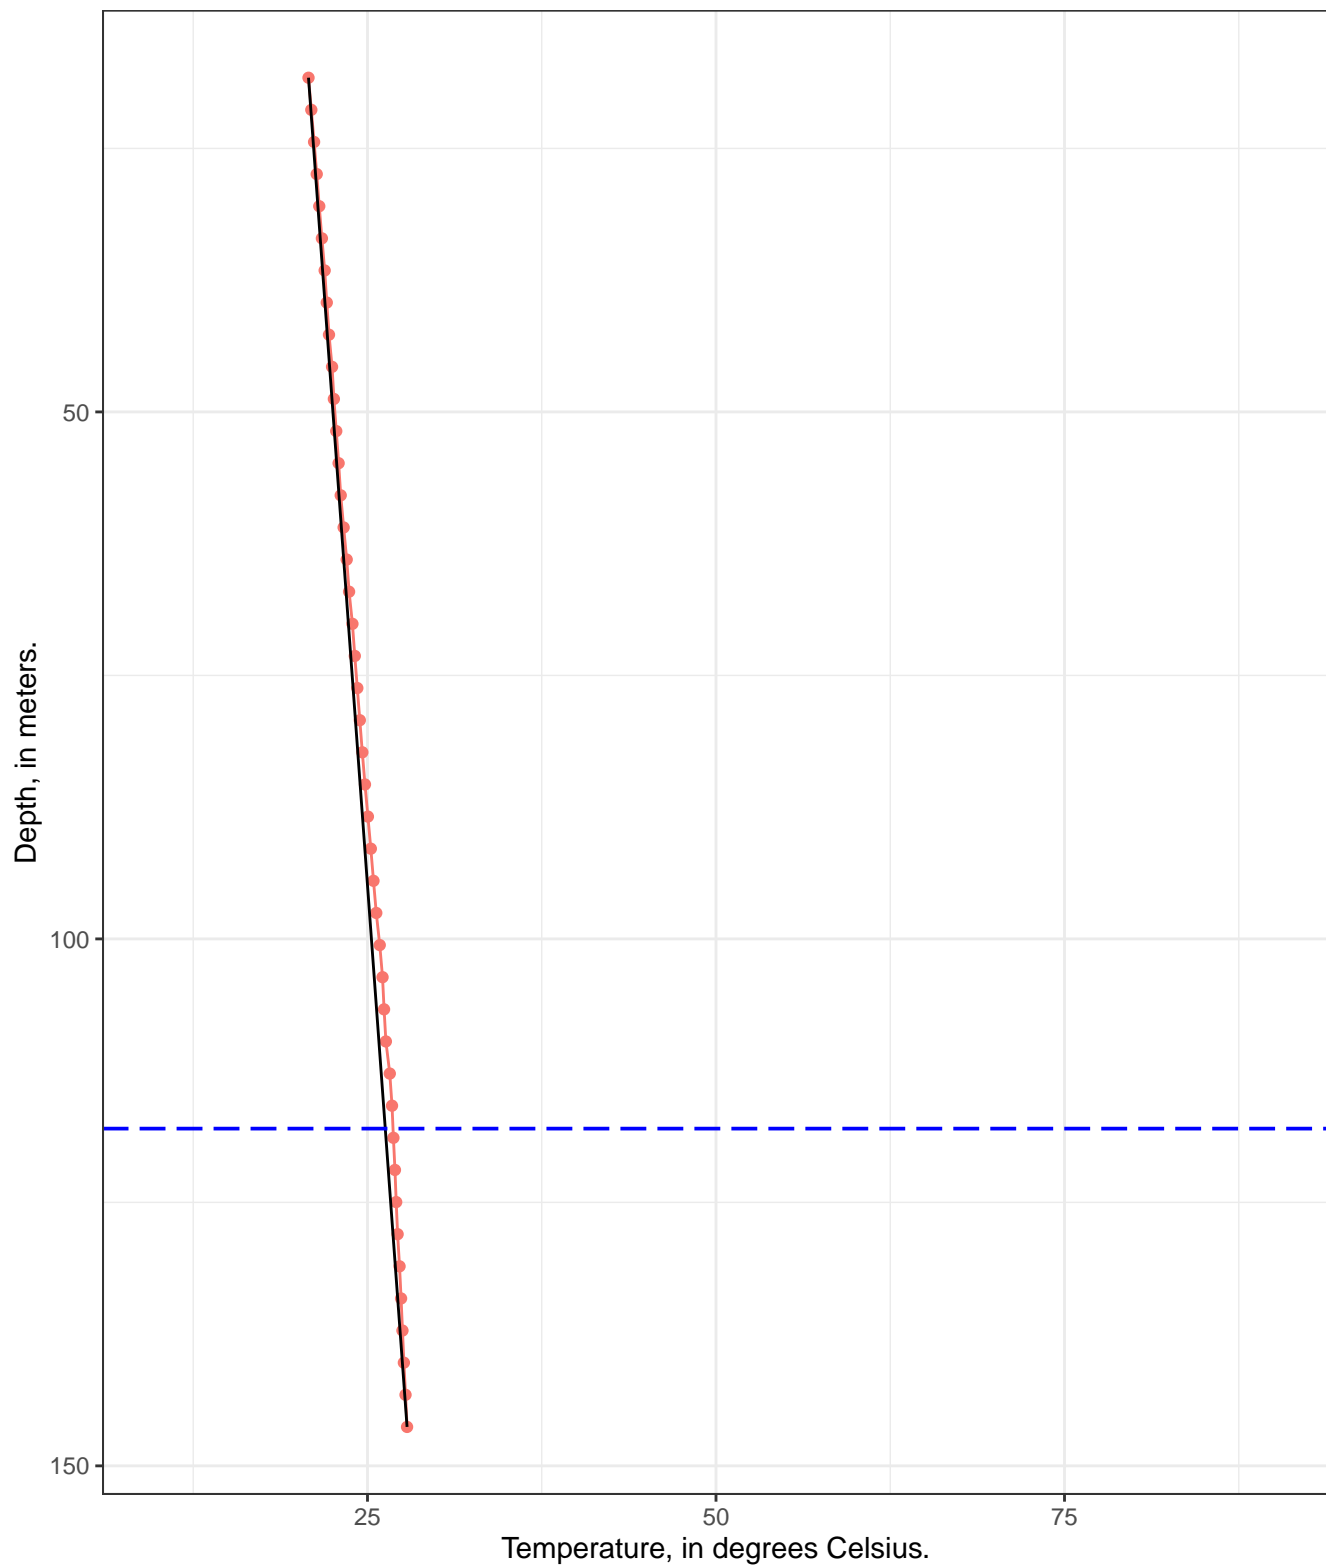

ID: 155 [H-4-80-1225\_KILBOURNE\_HOLE]

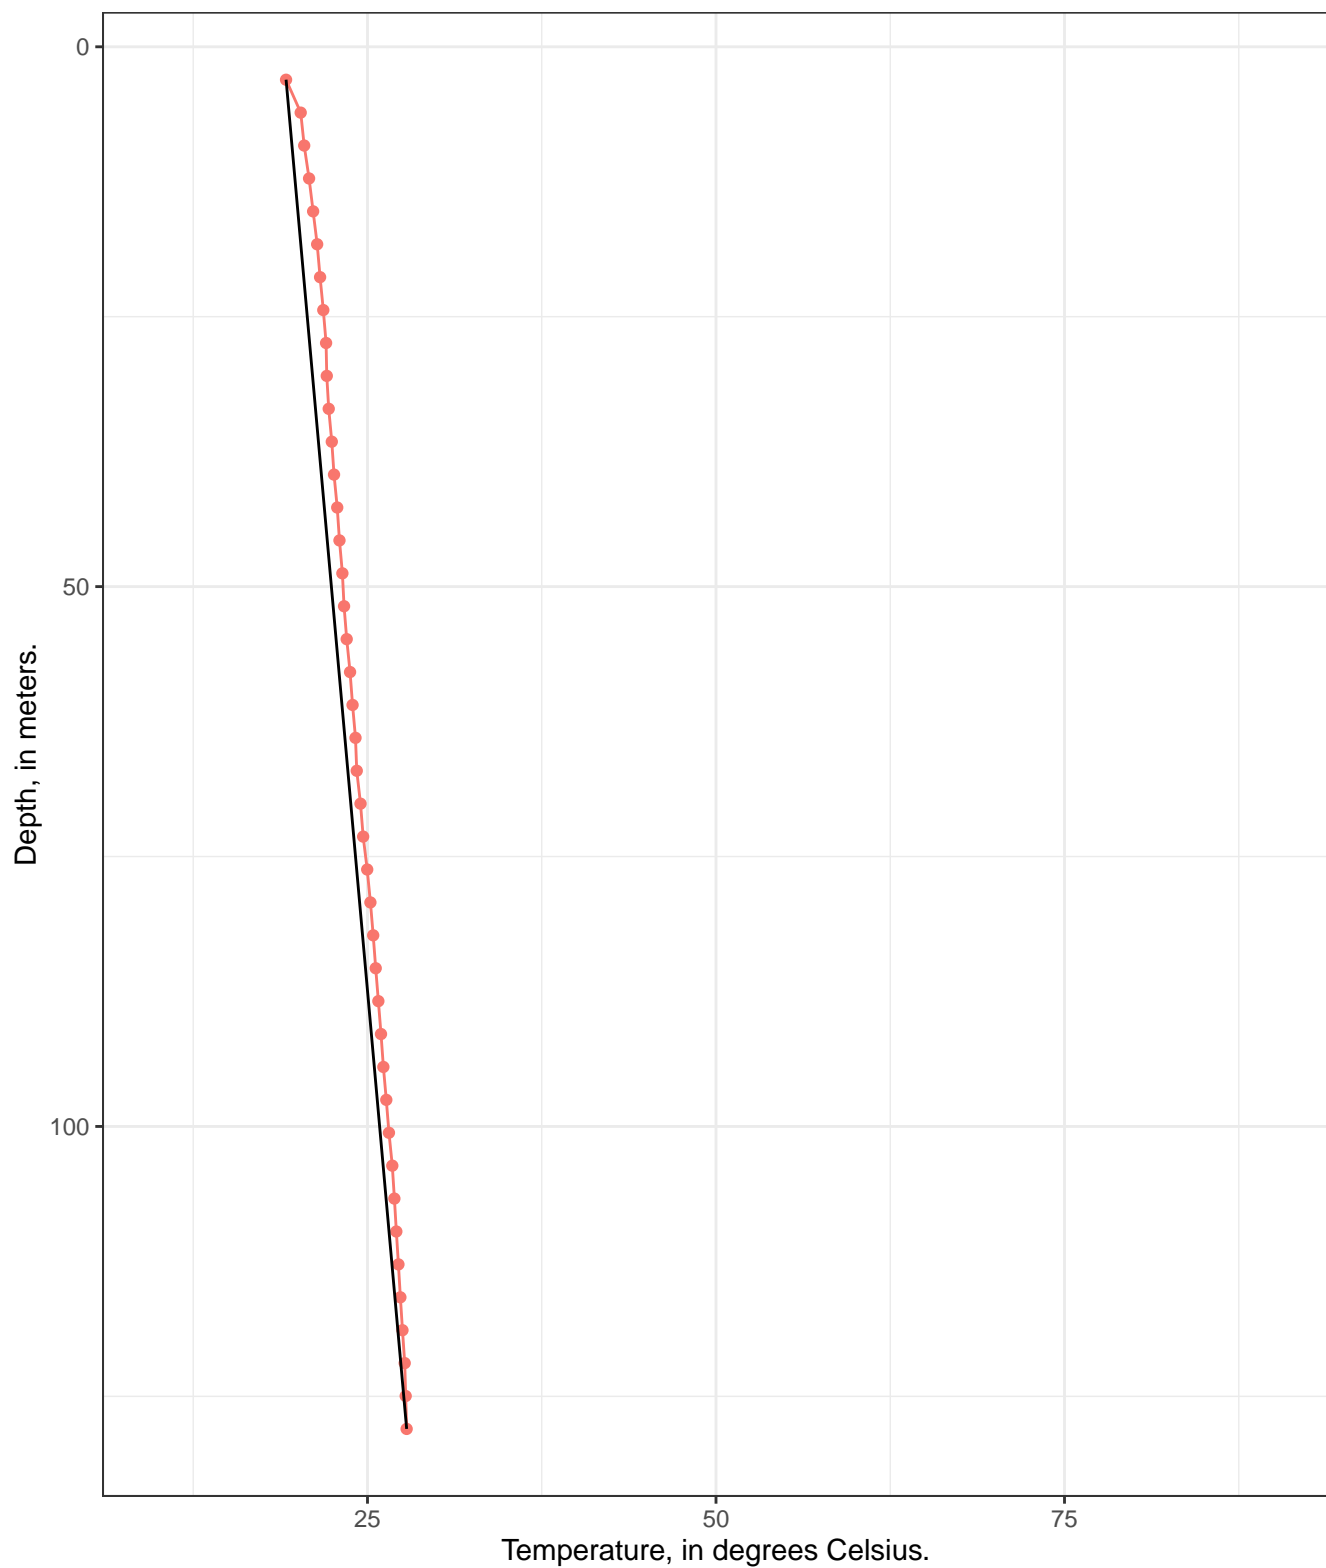

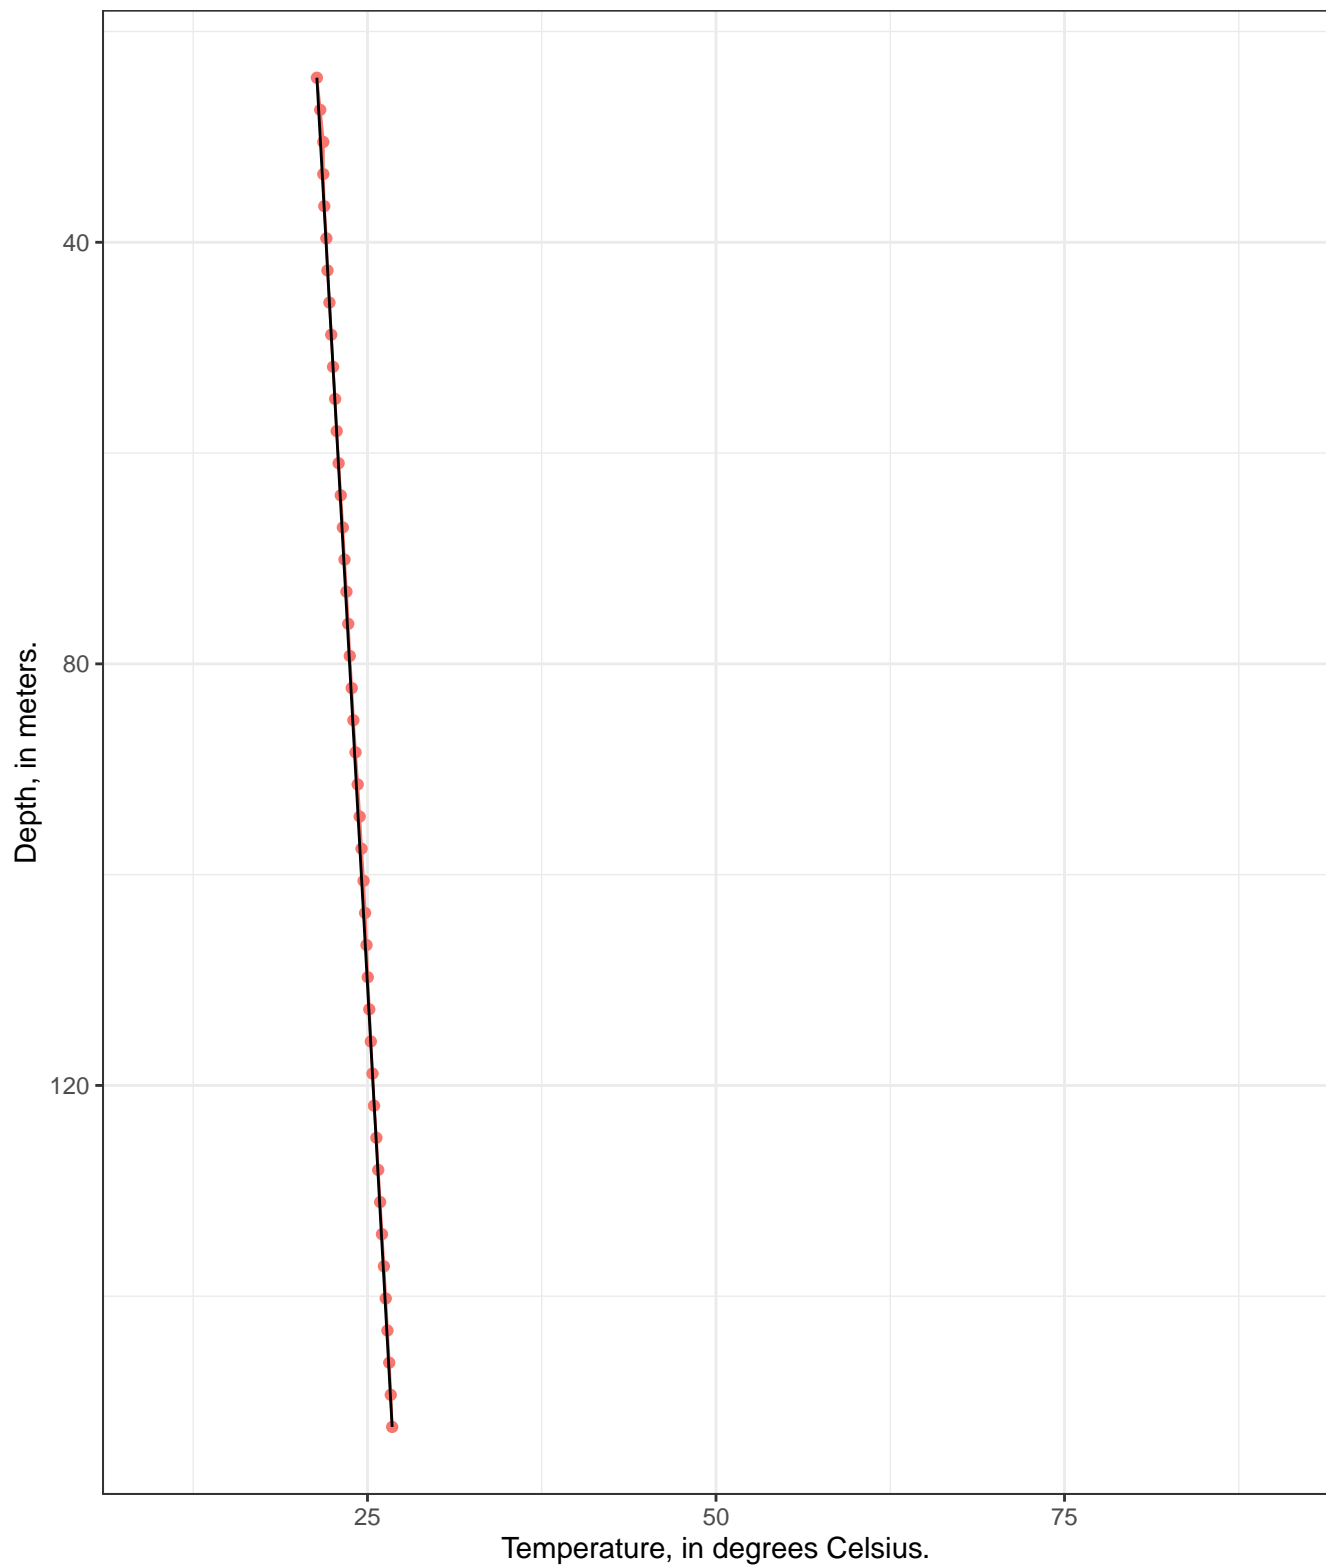

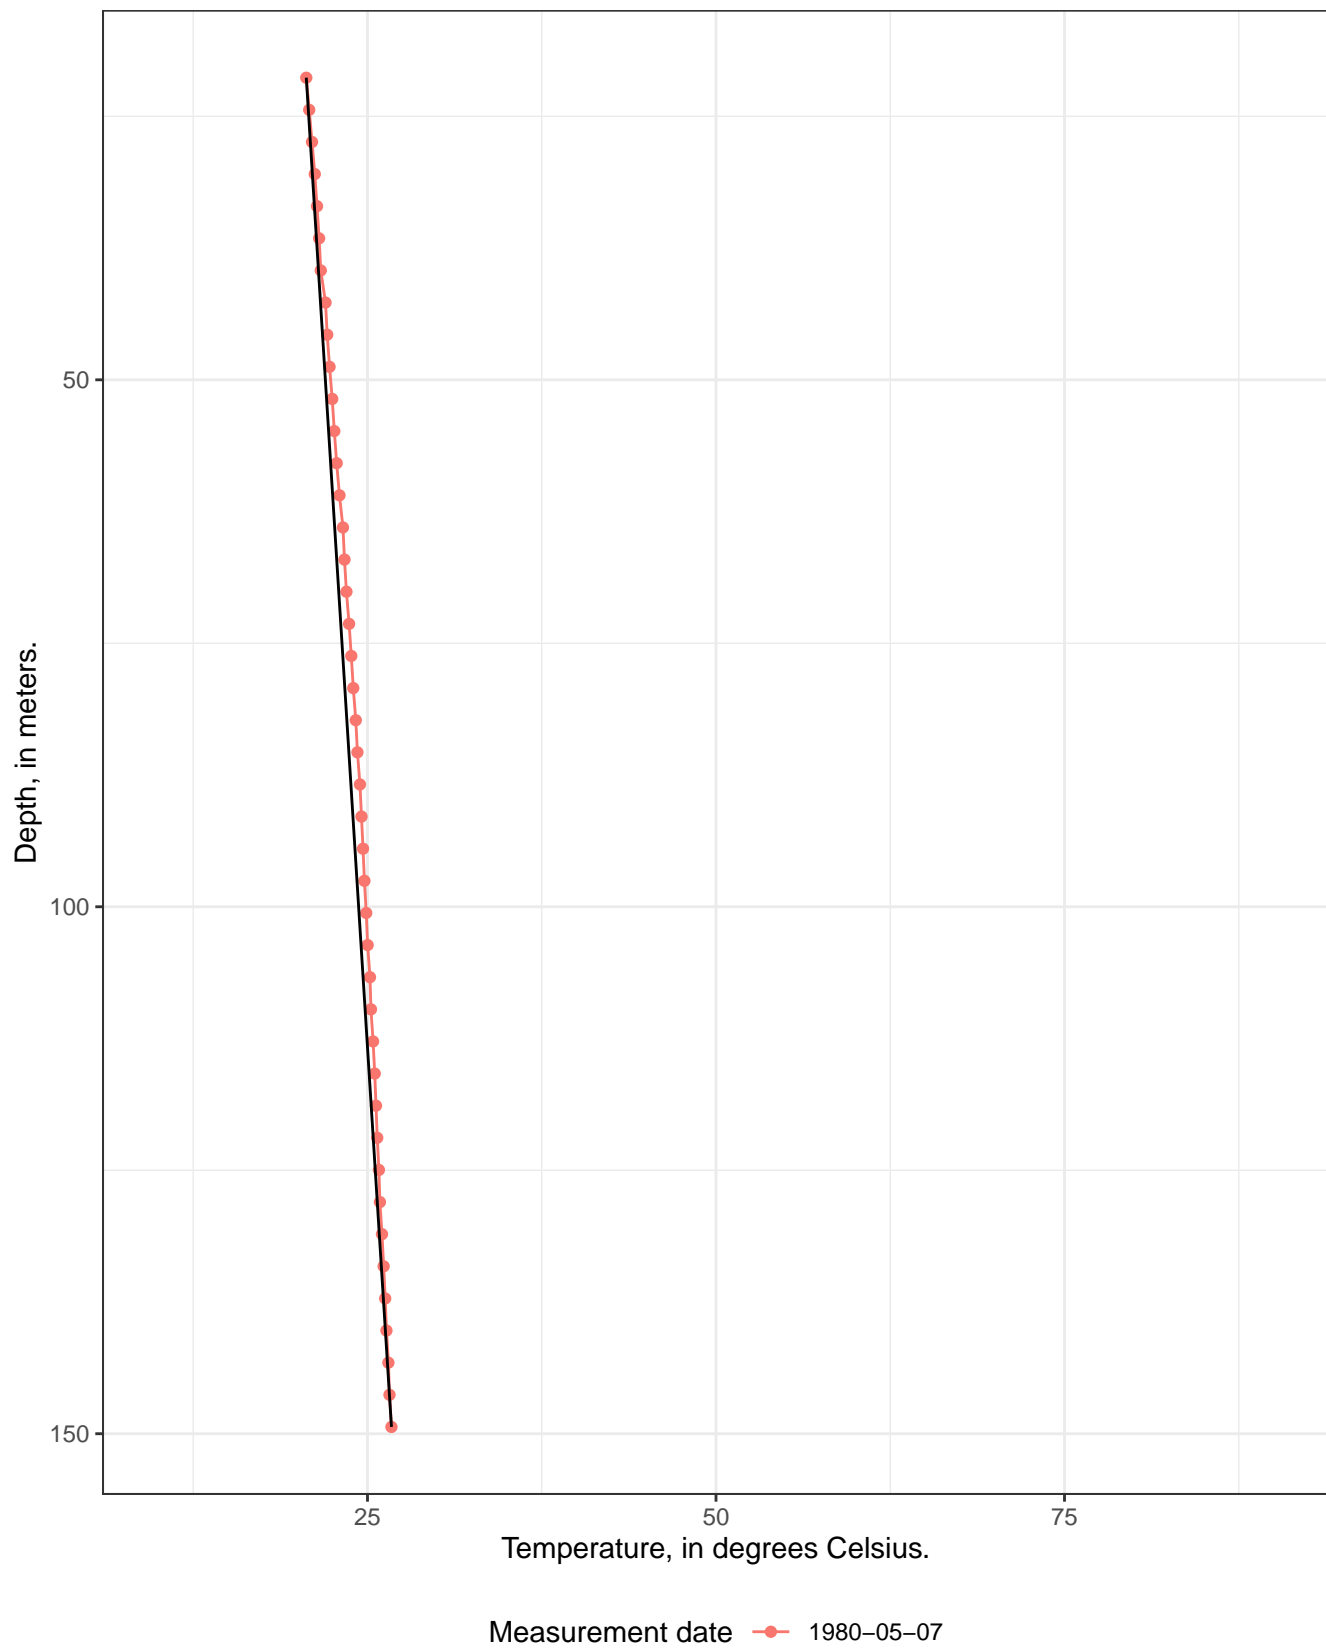

ID: 158 [H-4-80-1229\_KILBOURNE\_HOLE]

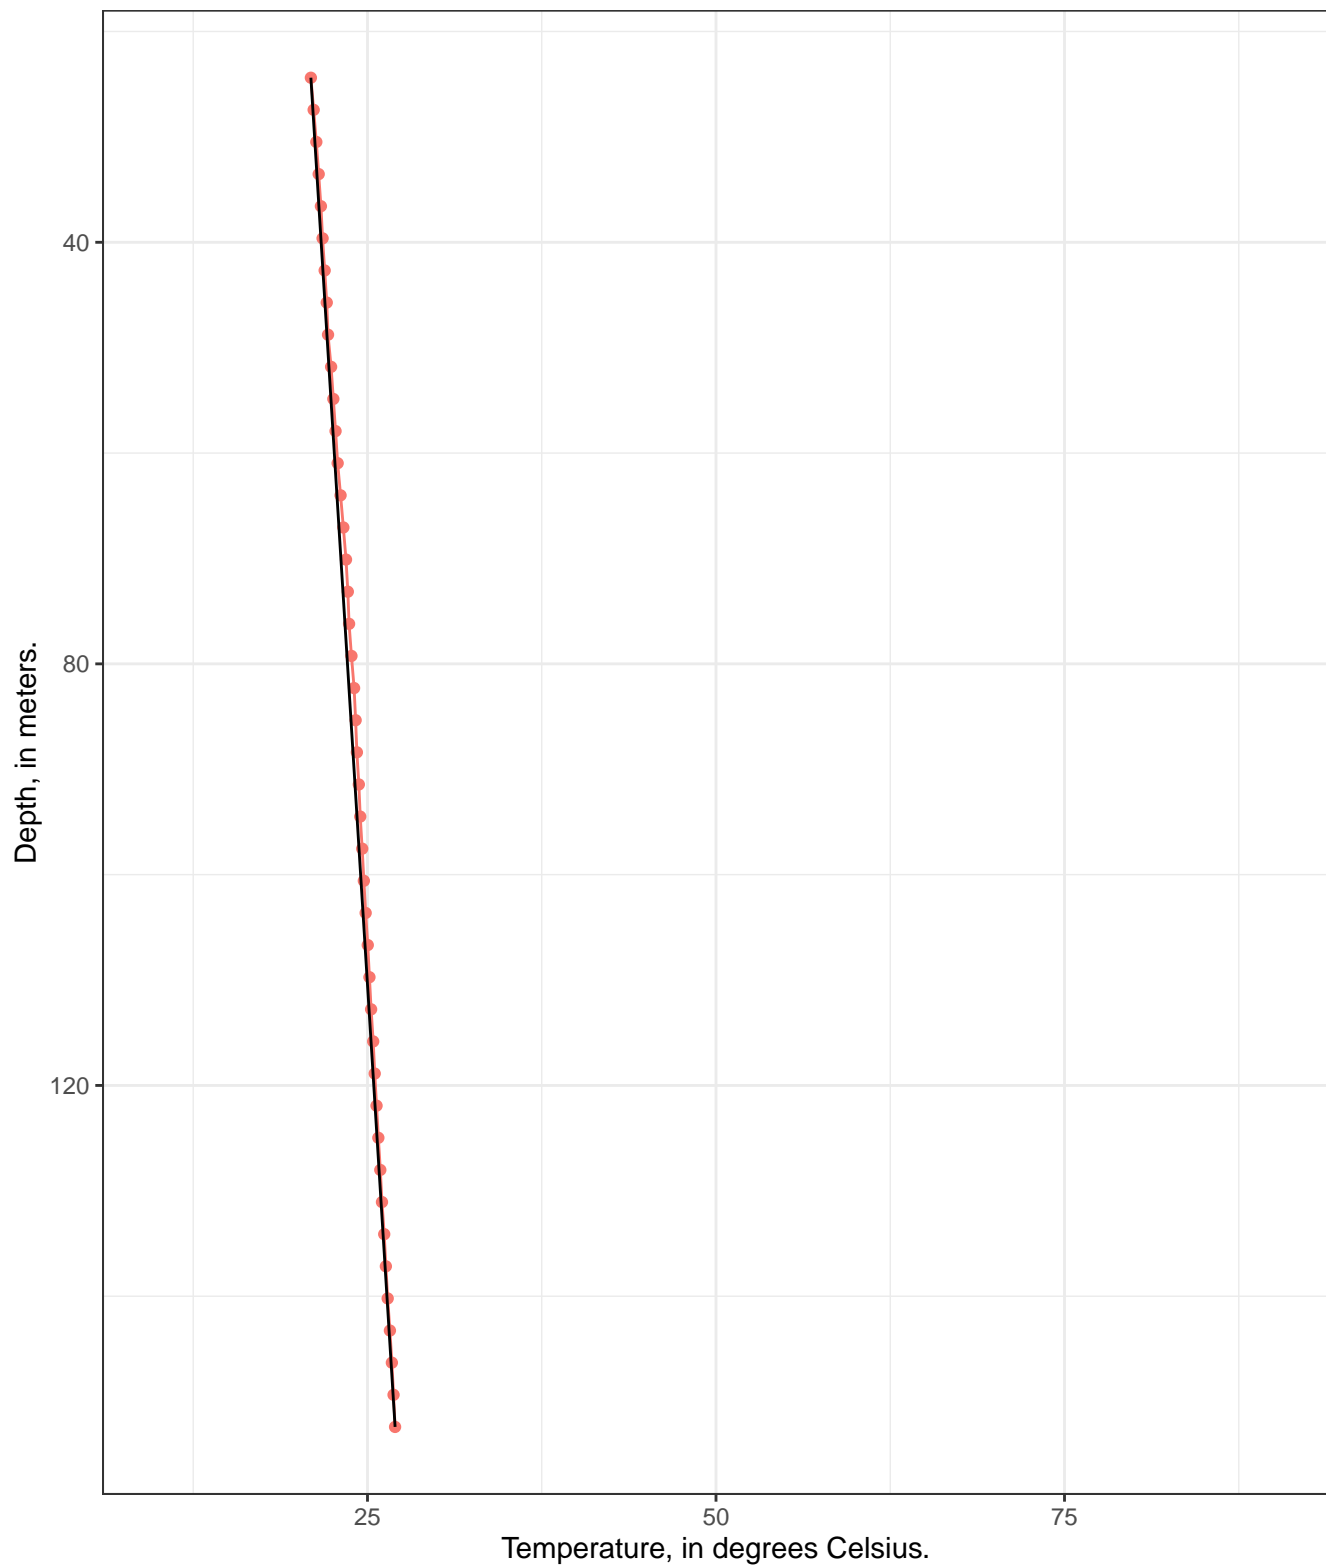

ID: 159 [H-4-80-1236\_KILBOURNE\_HOLE]

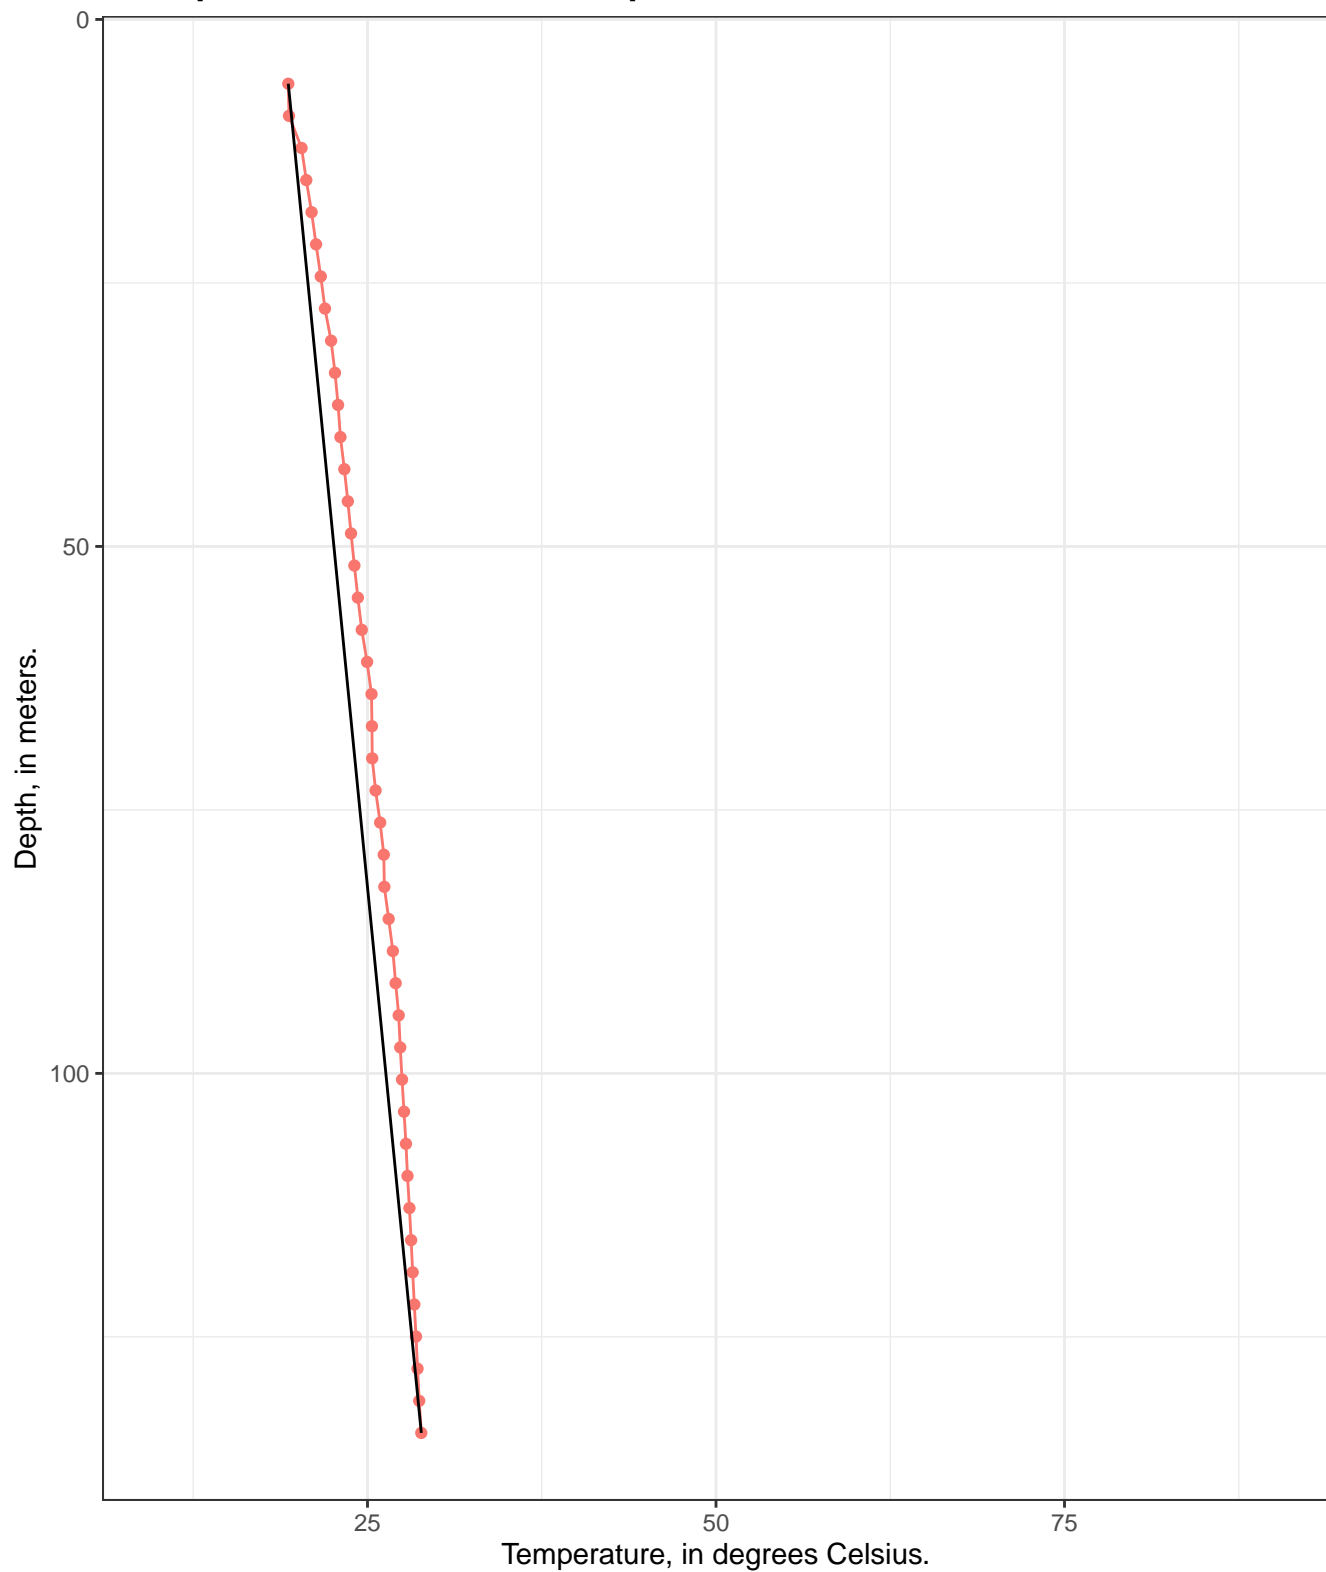



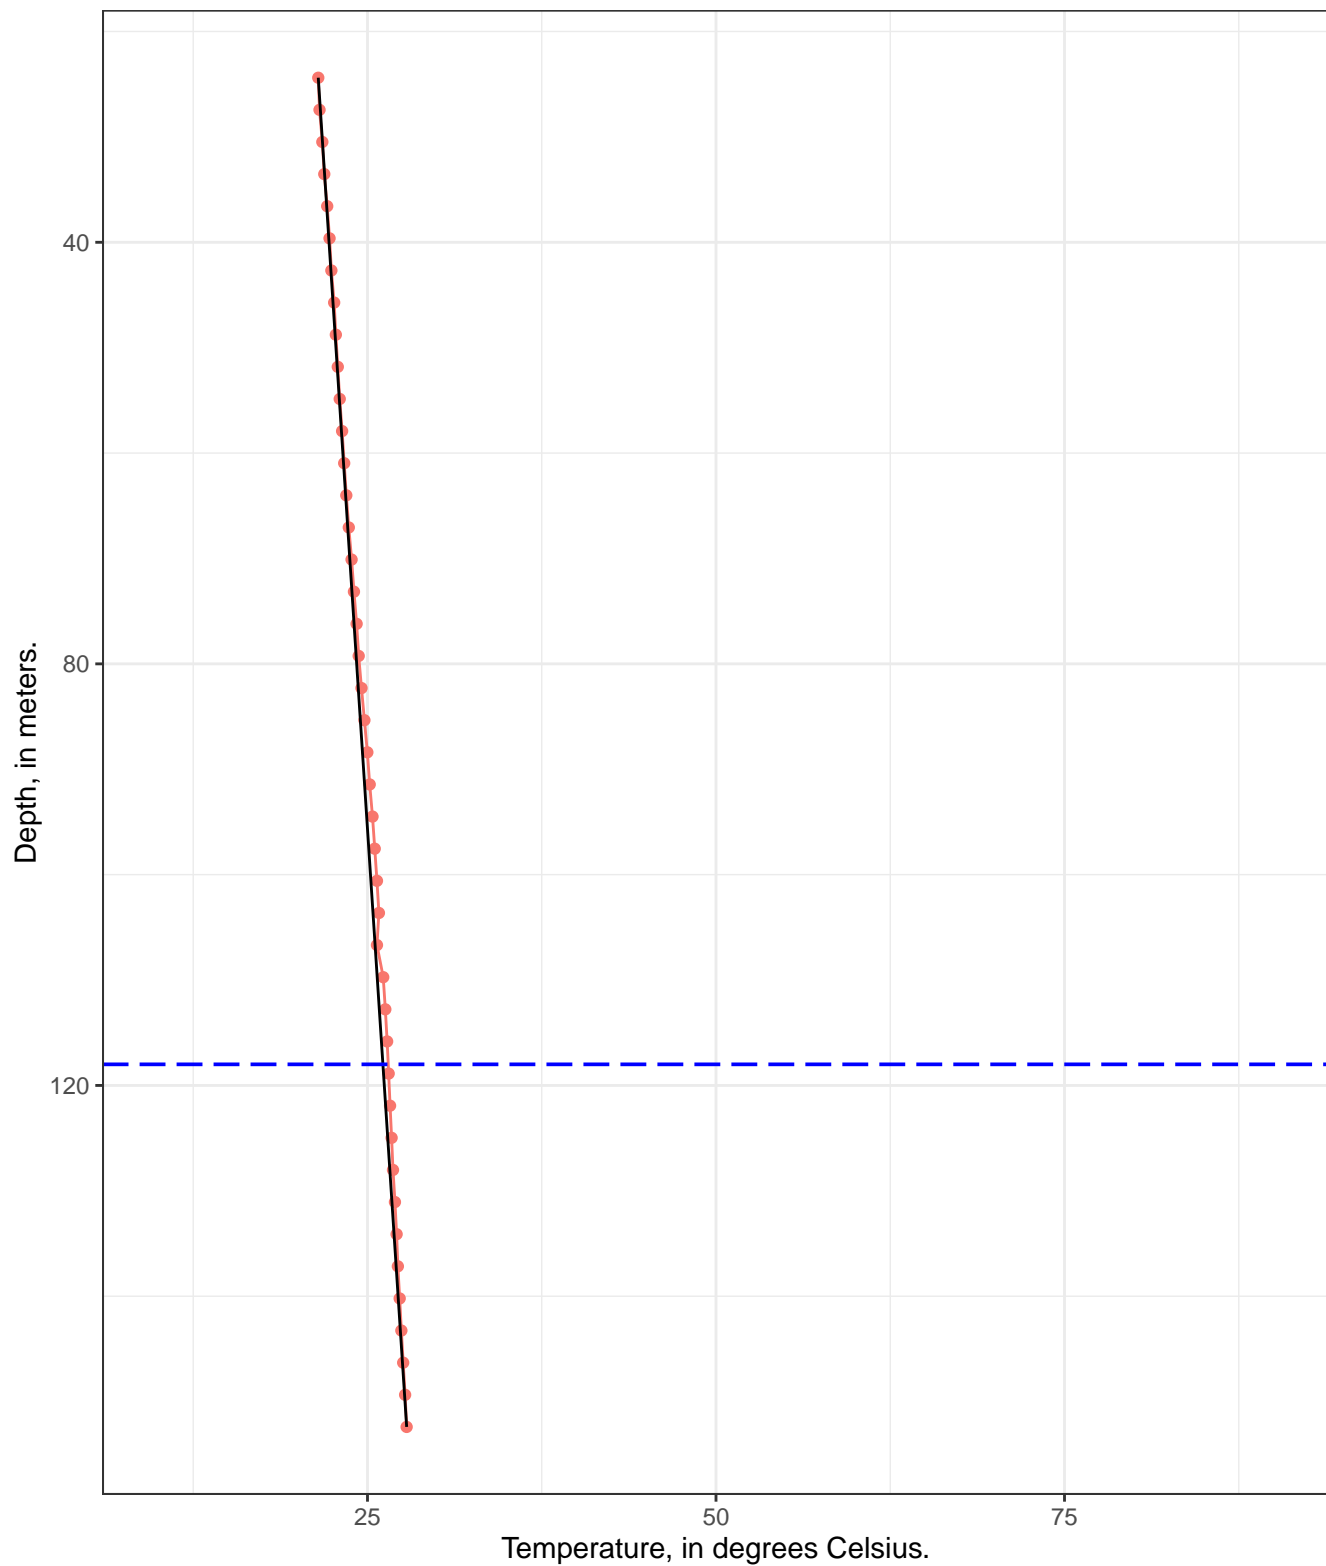

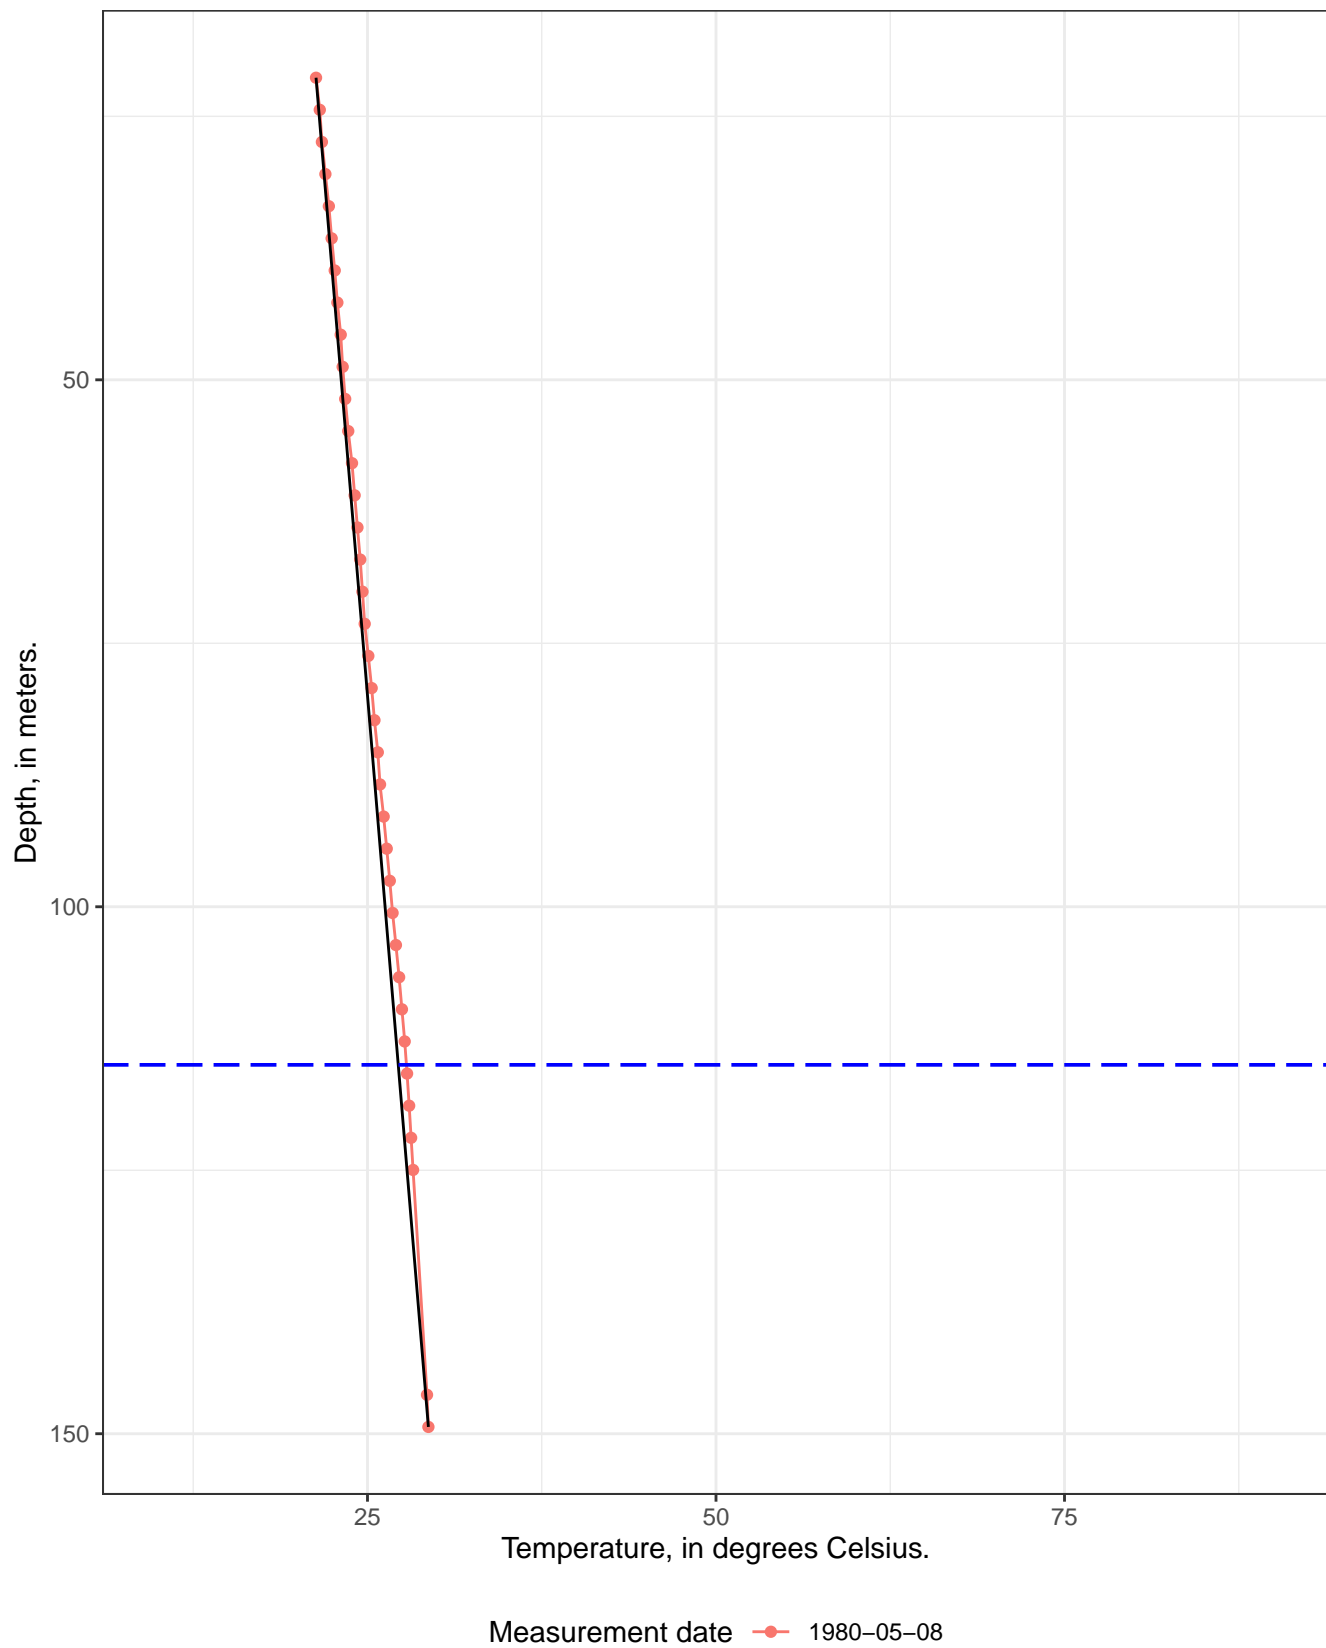

ID: 162 [H-6-78-1000\_KILBOURNE\_HOLE]

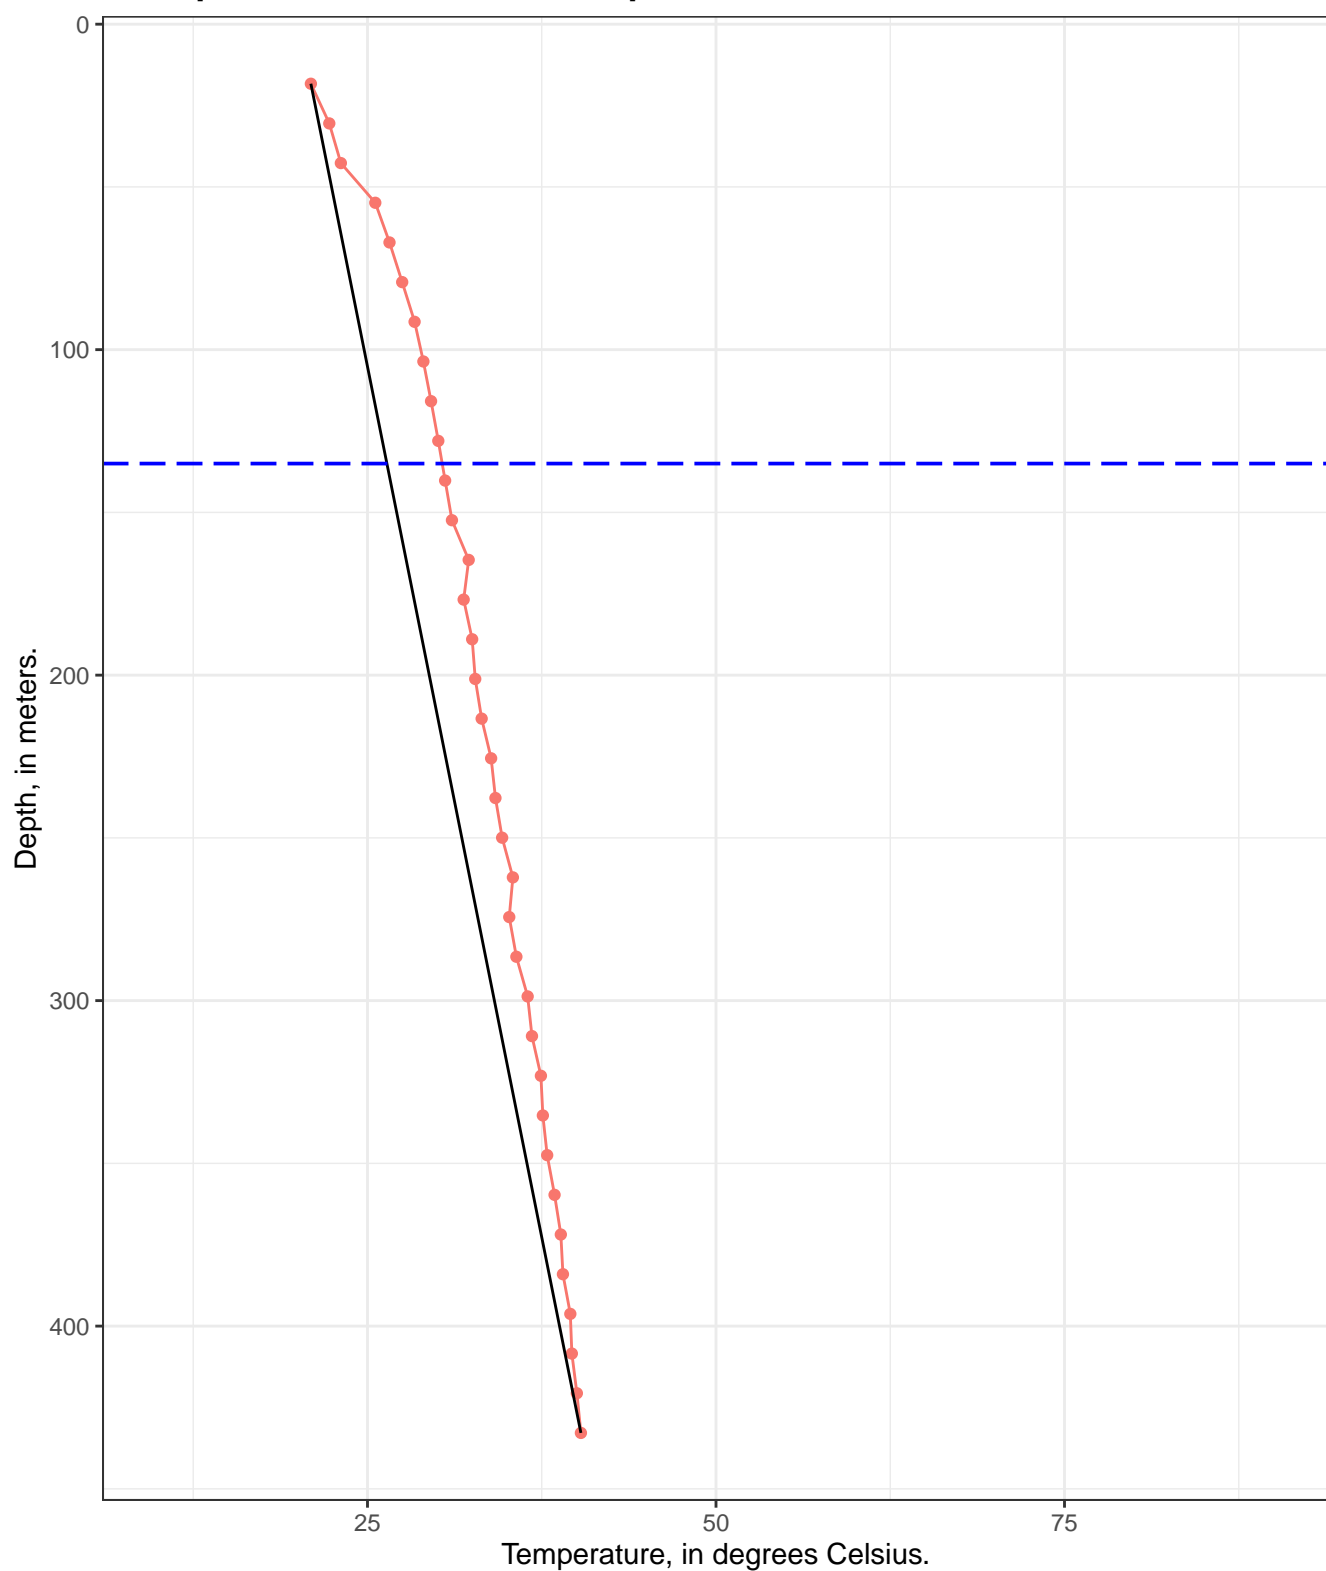

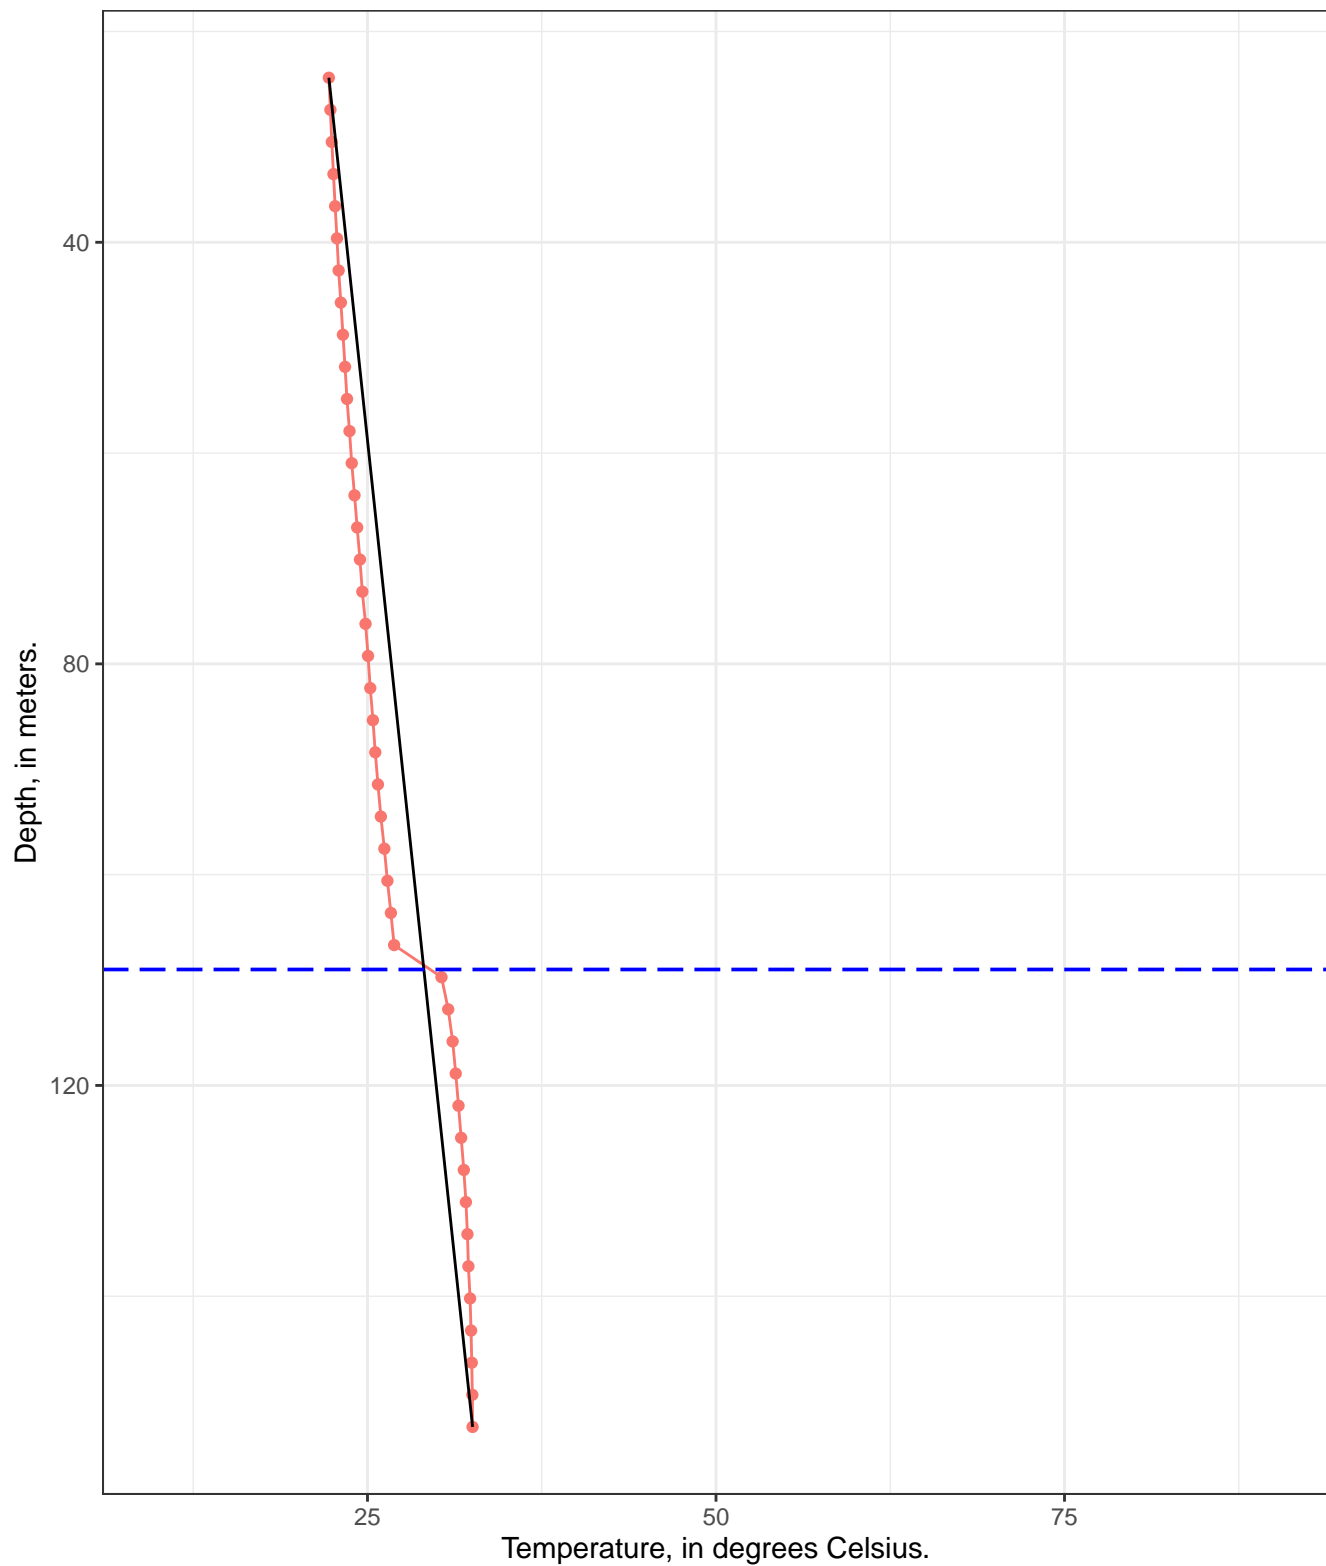

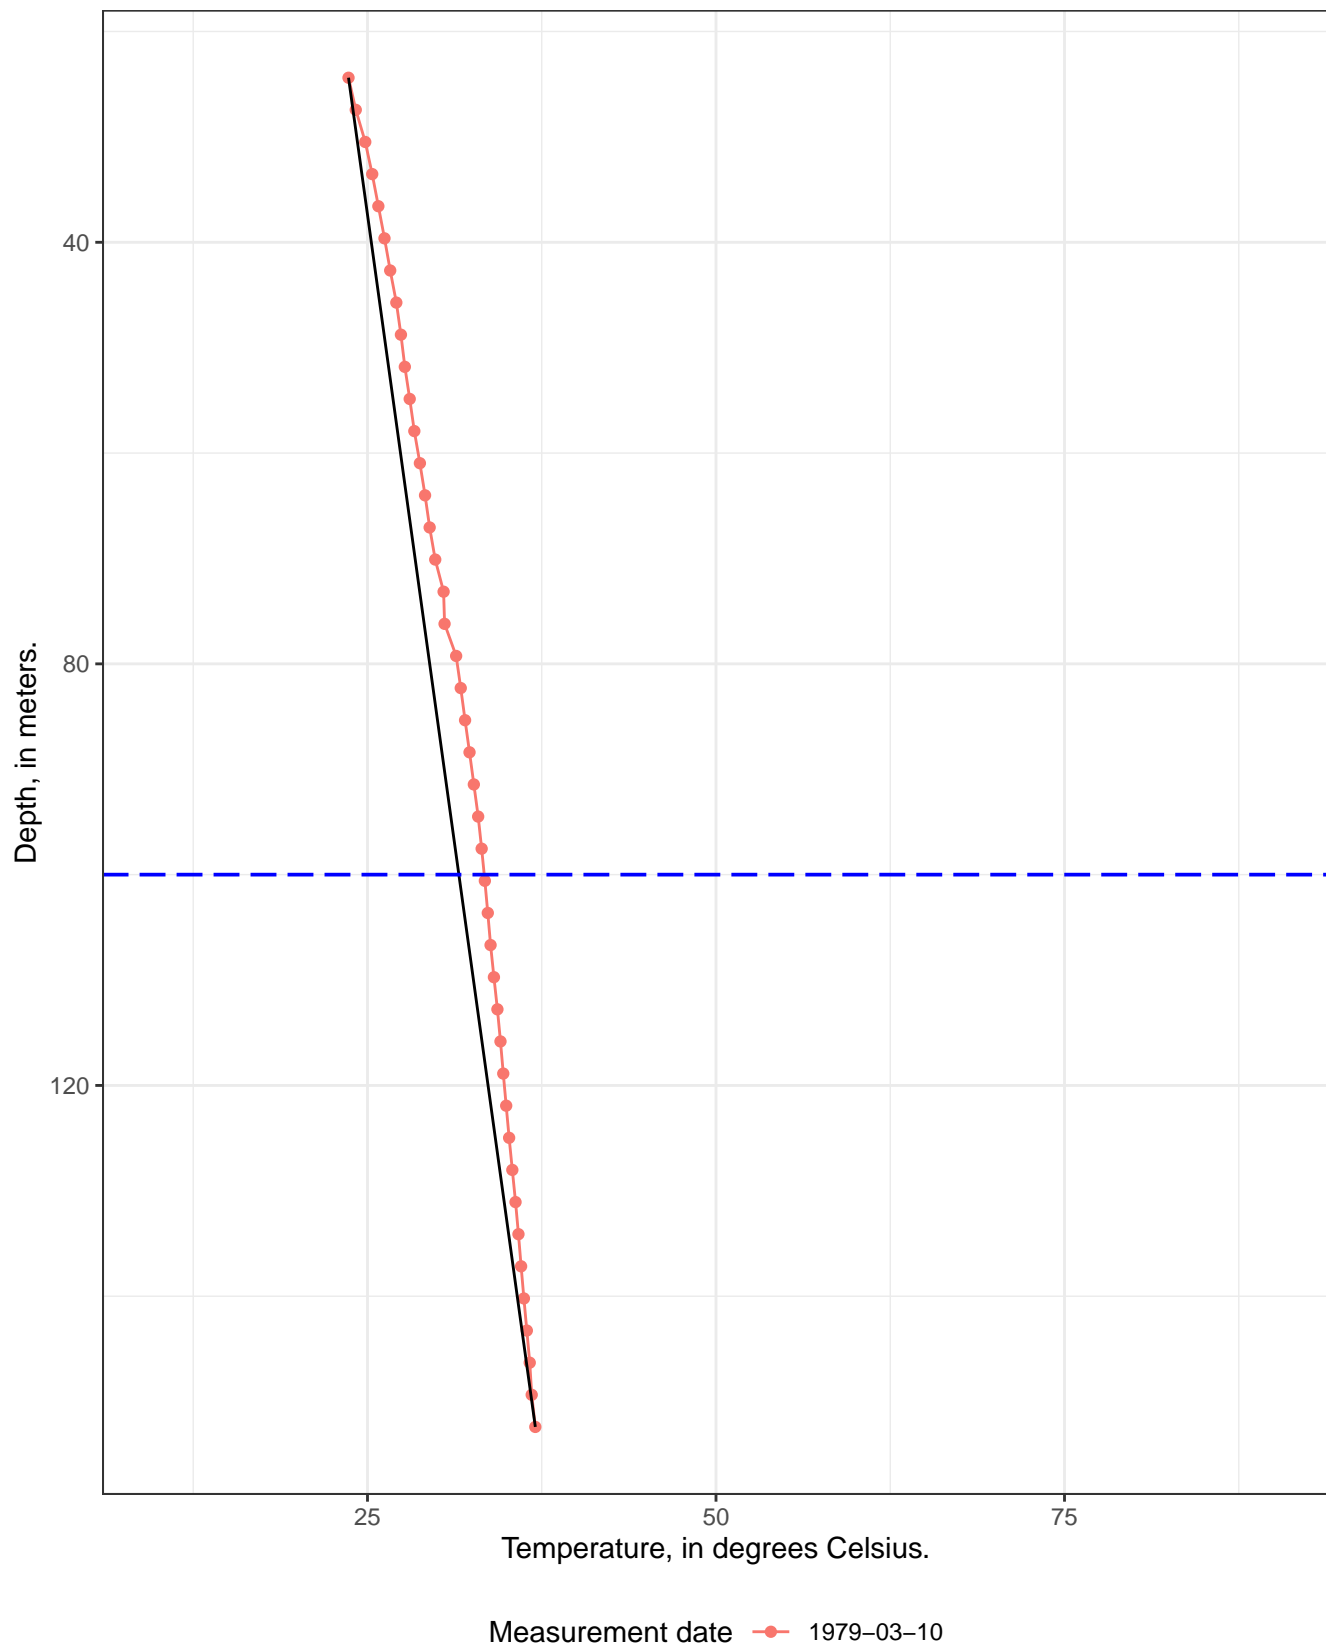

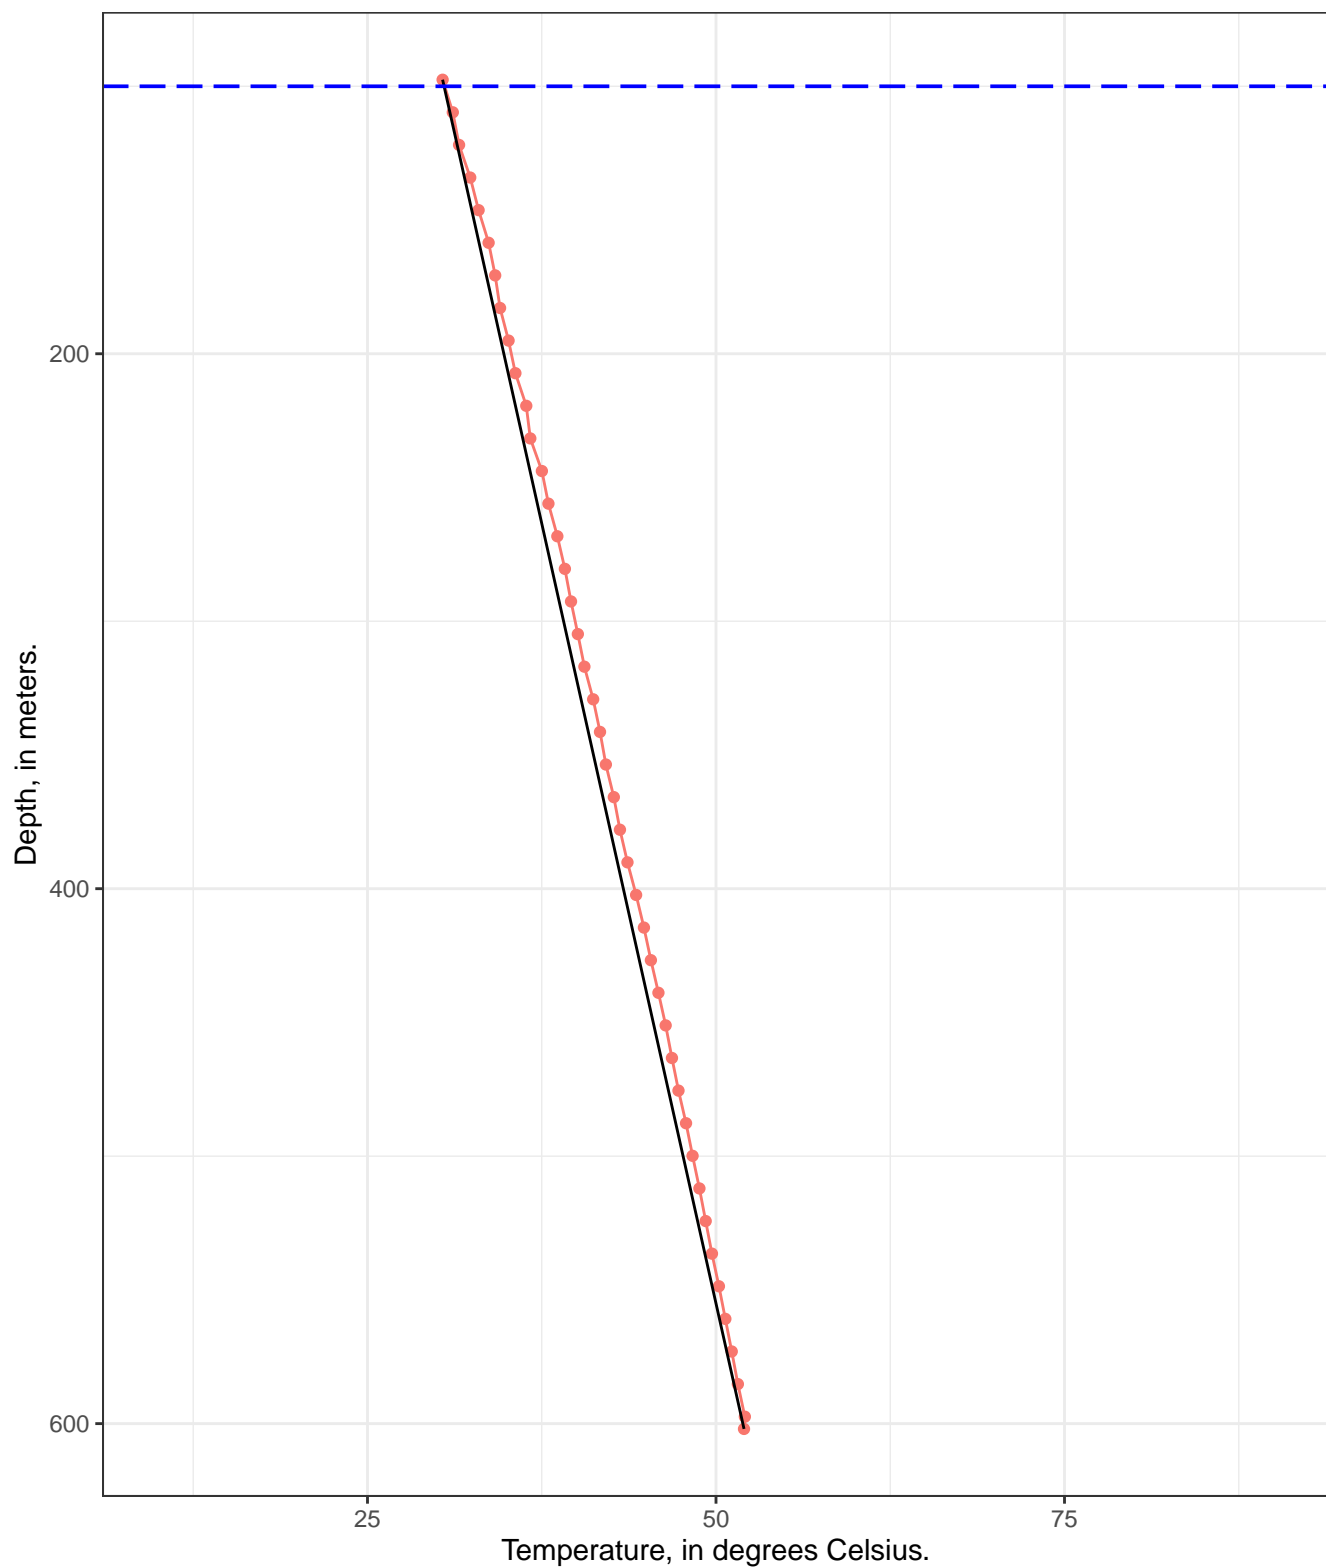

Measurement date 1979-03-26

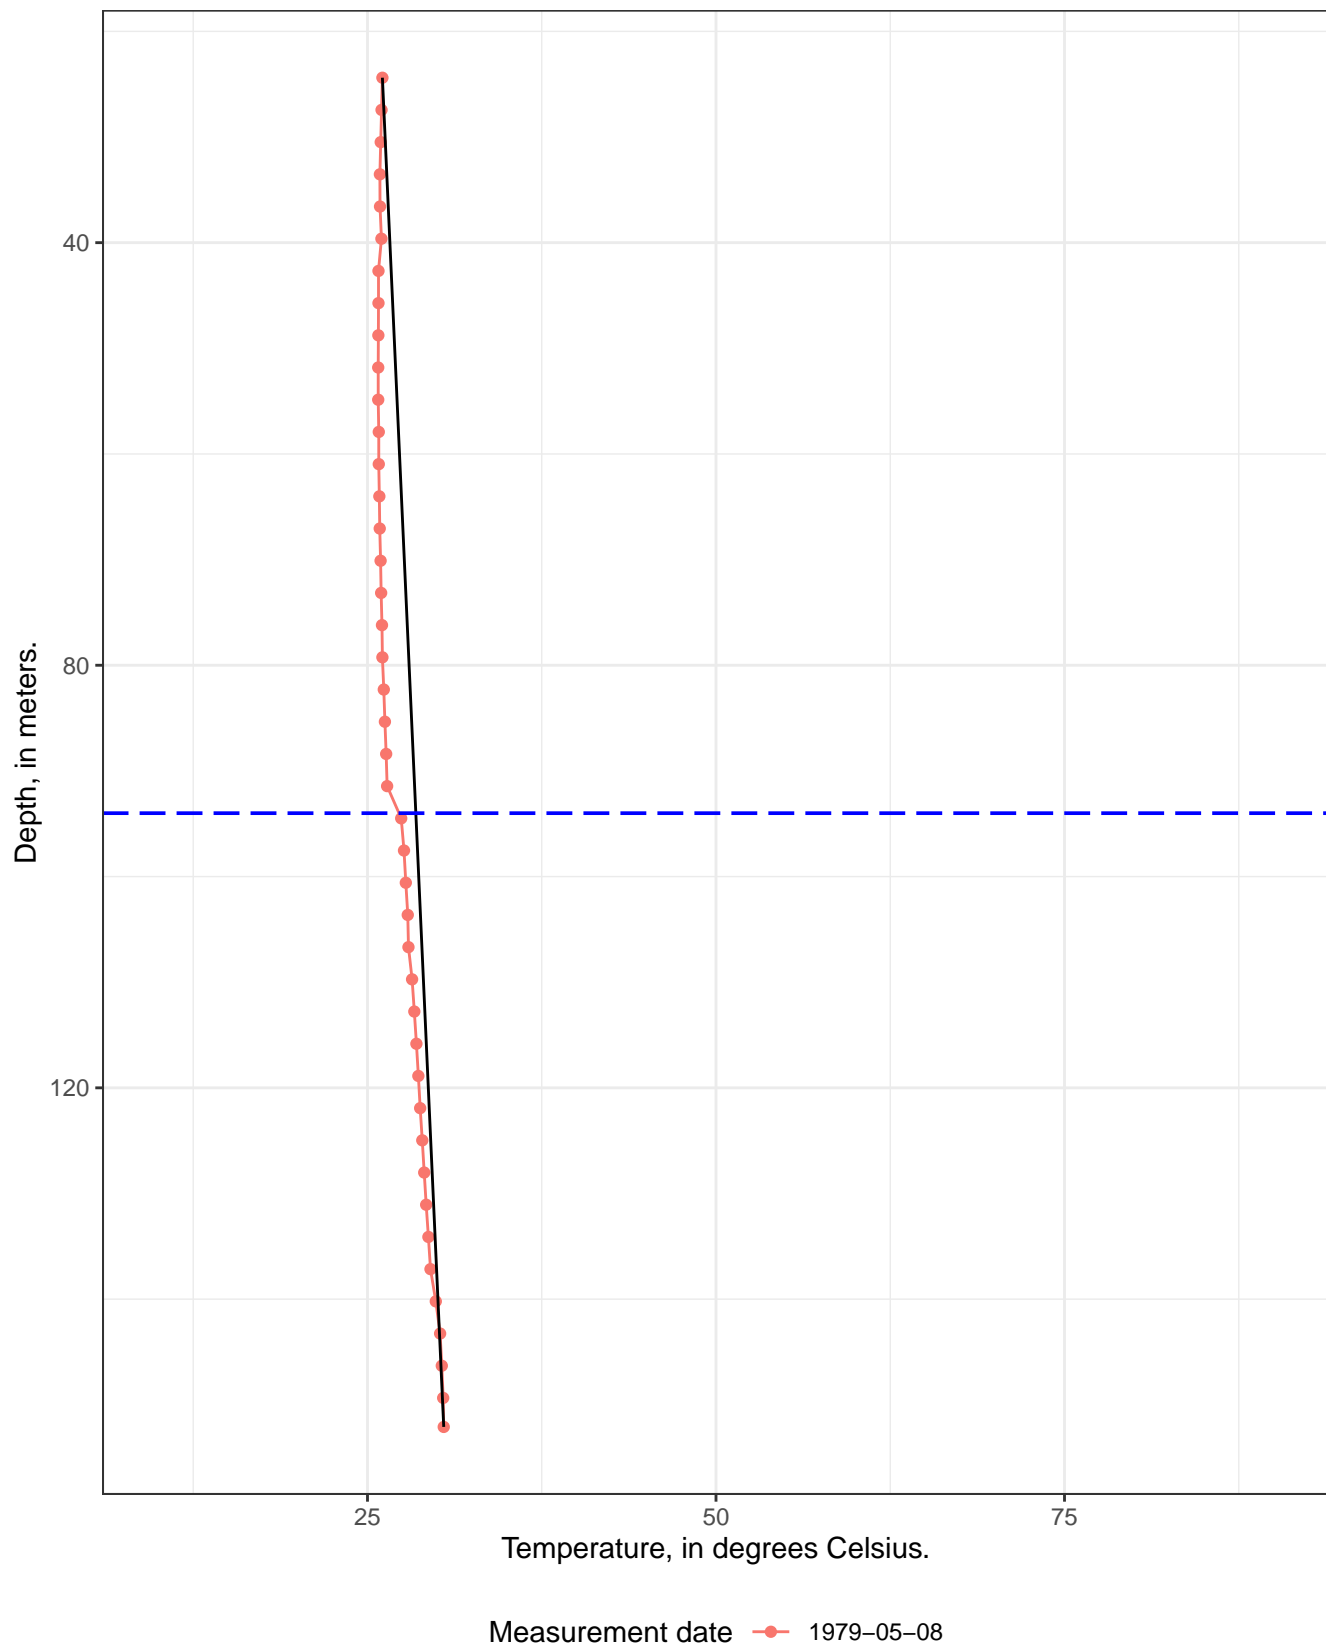

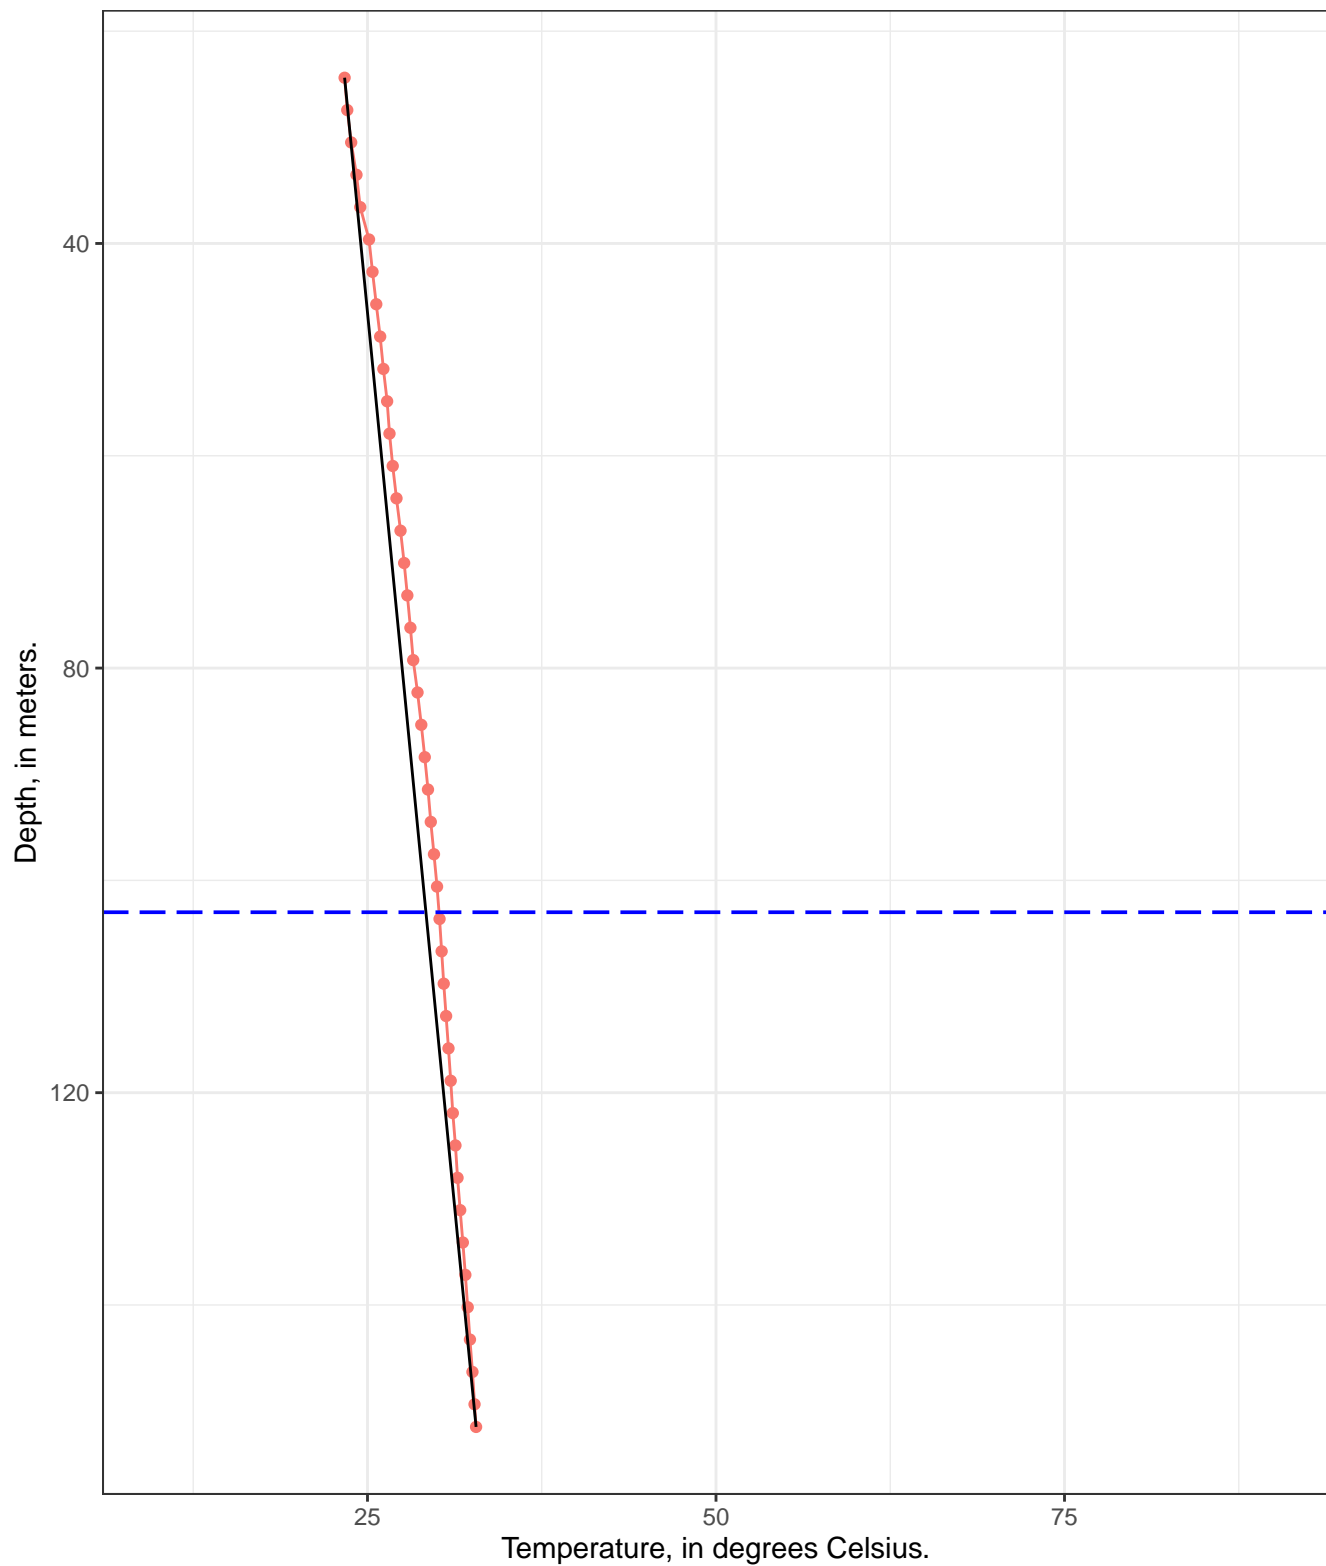



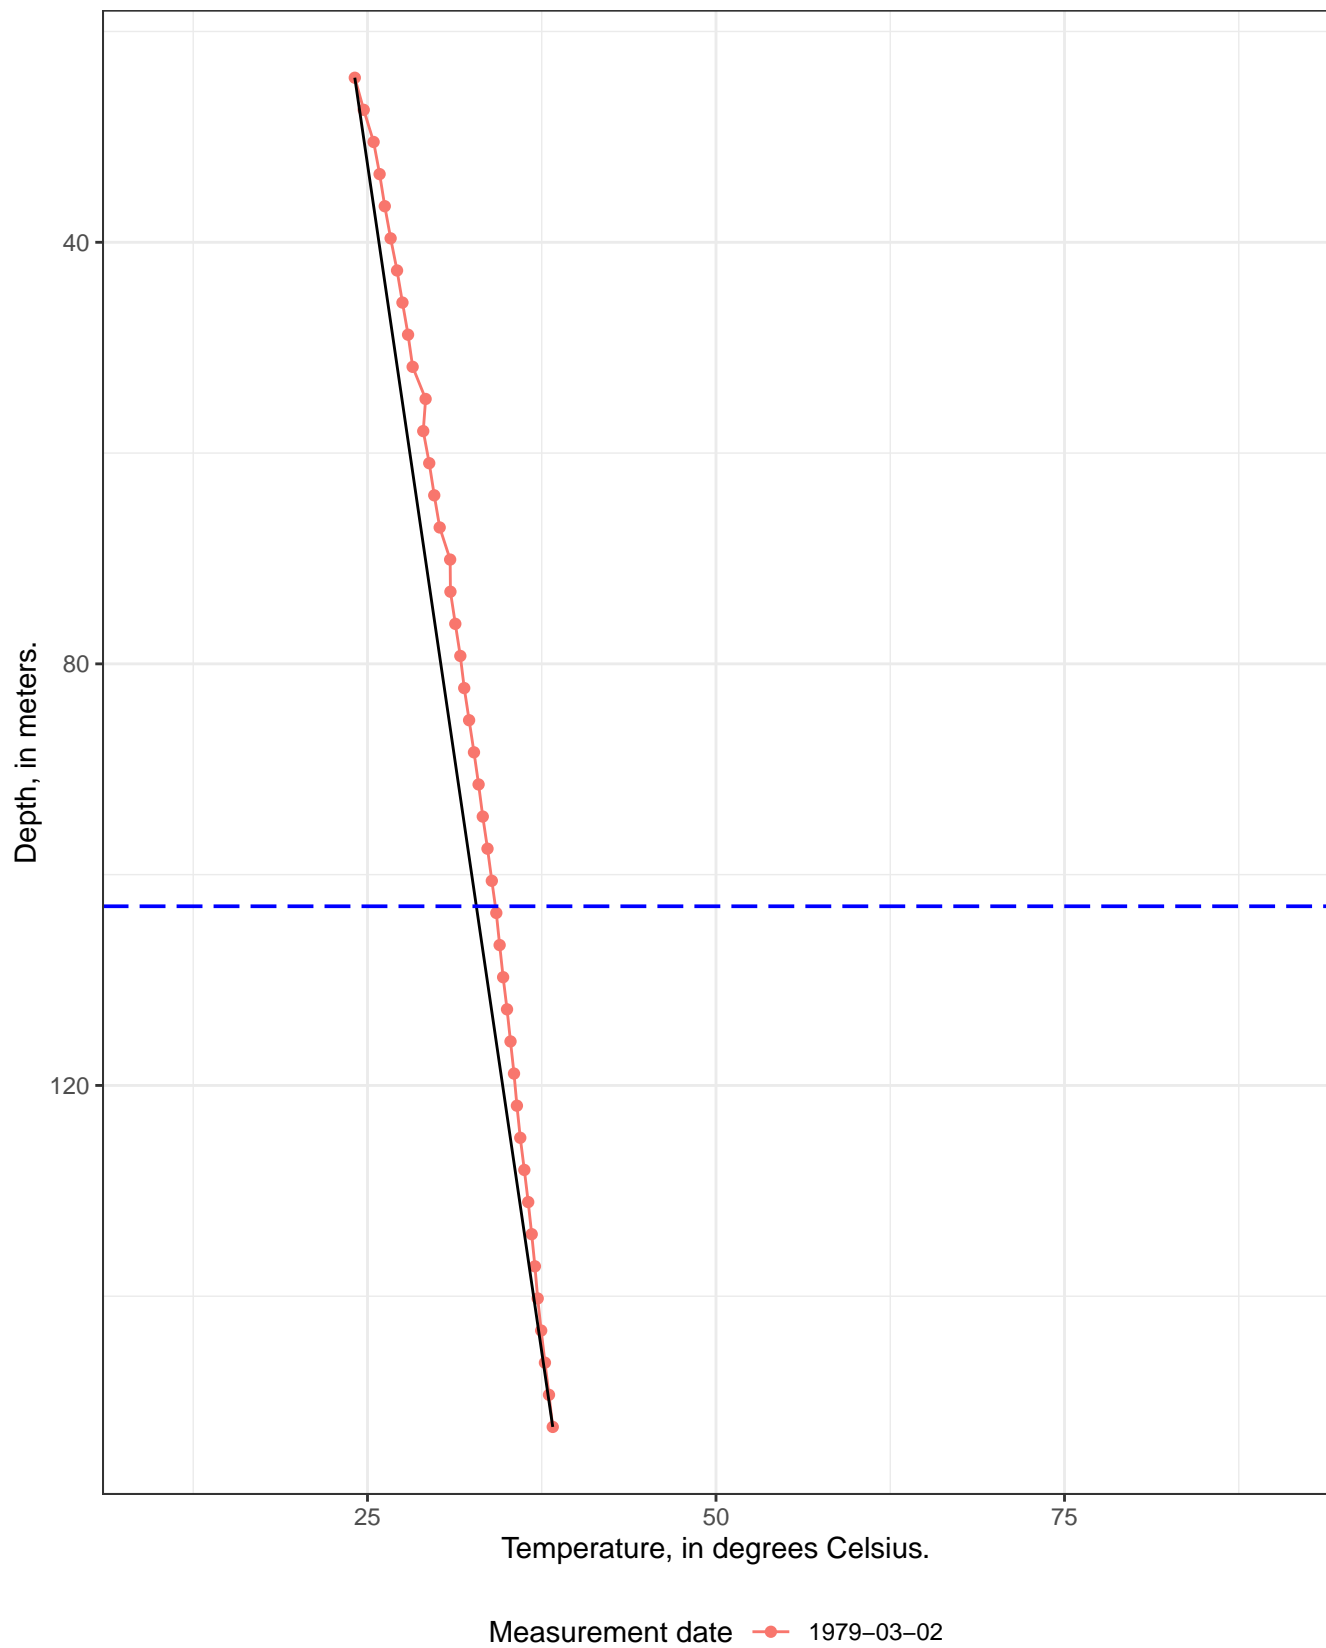

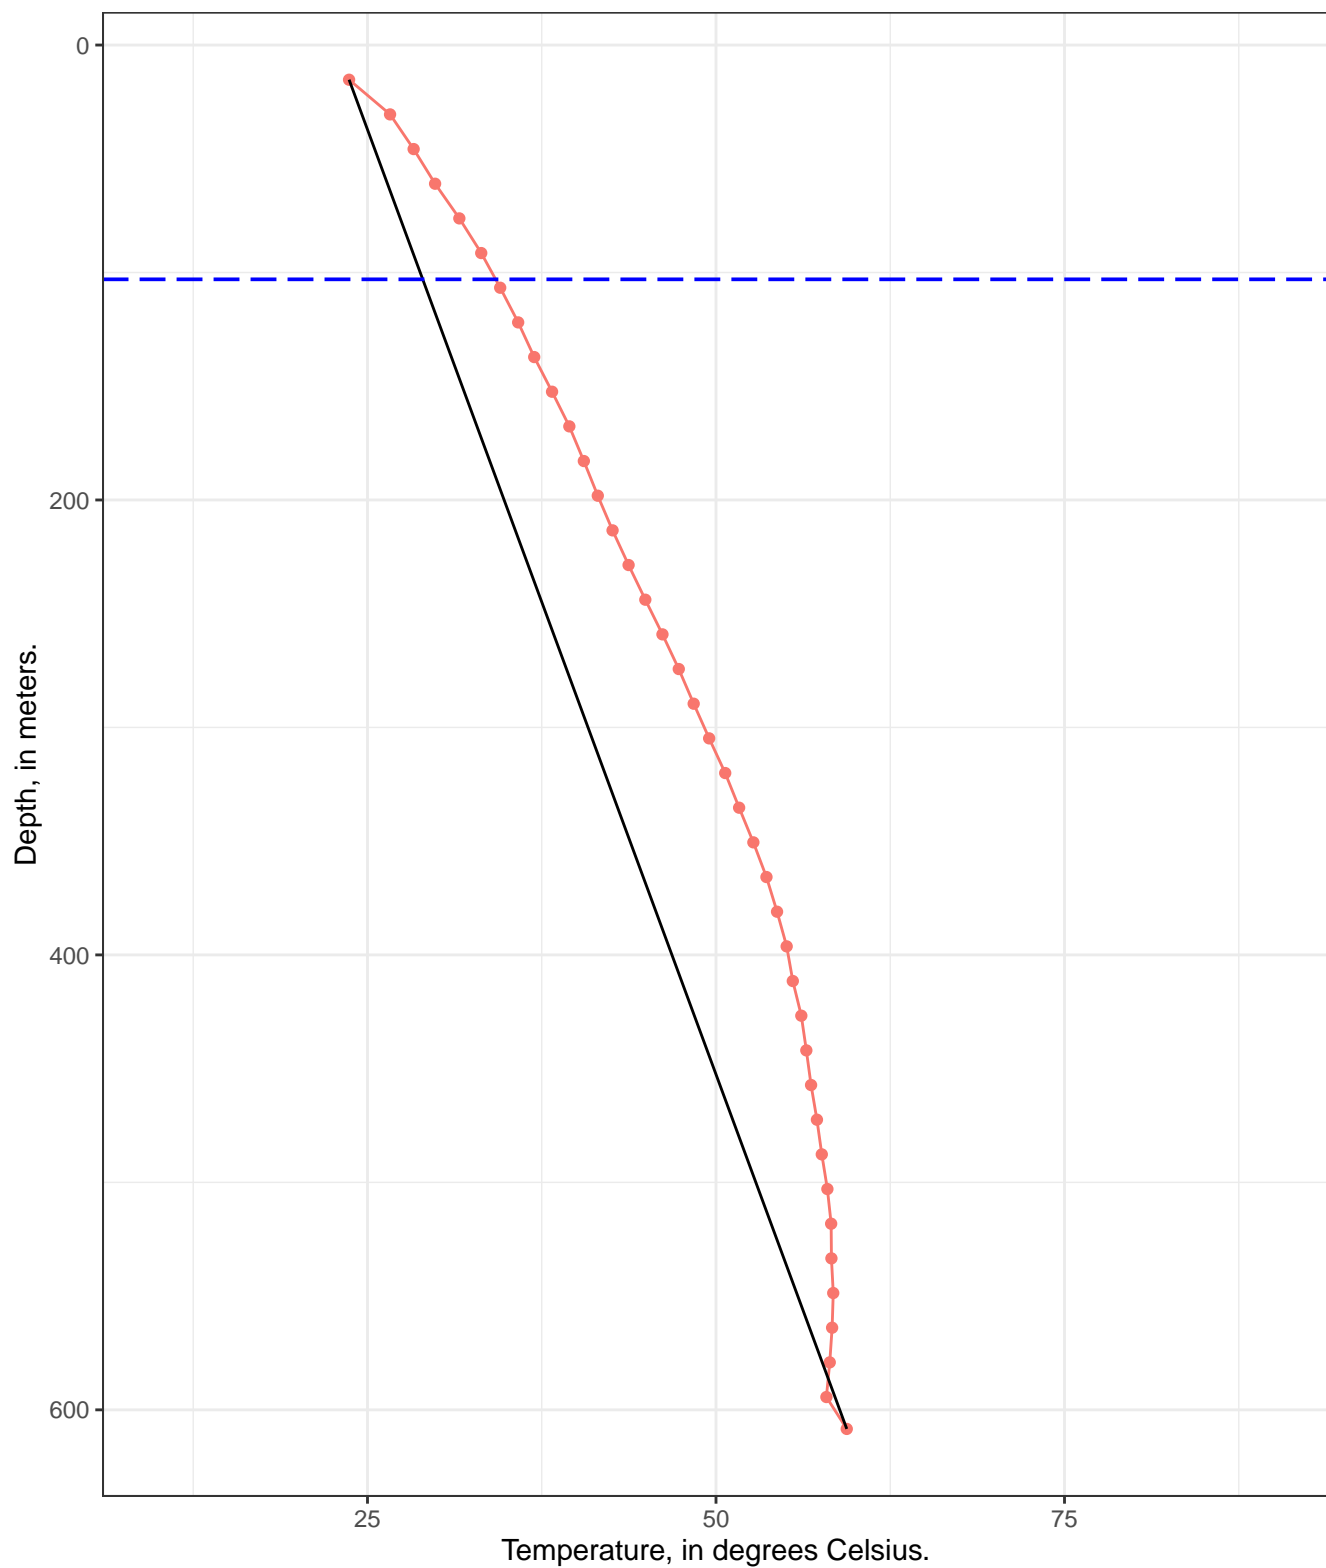

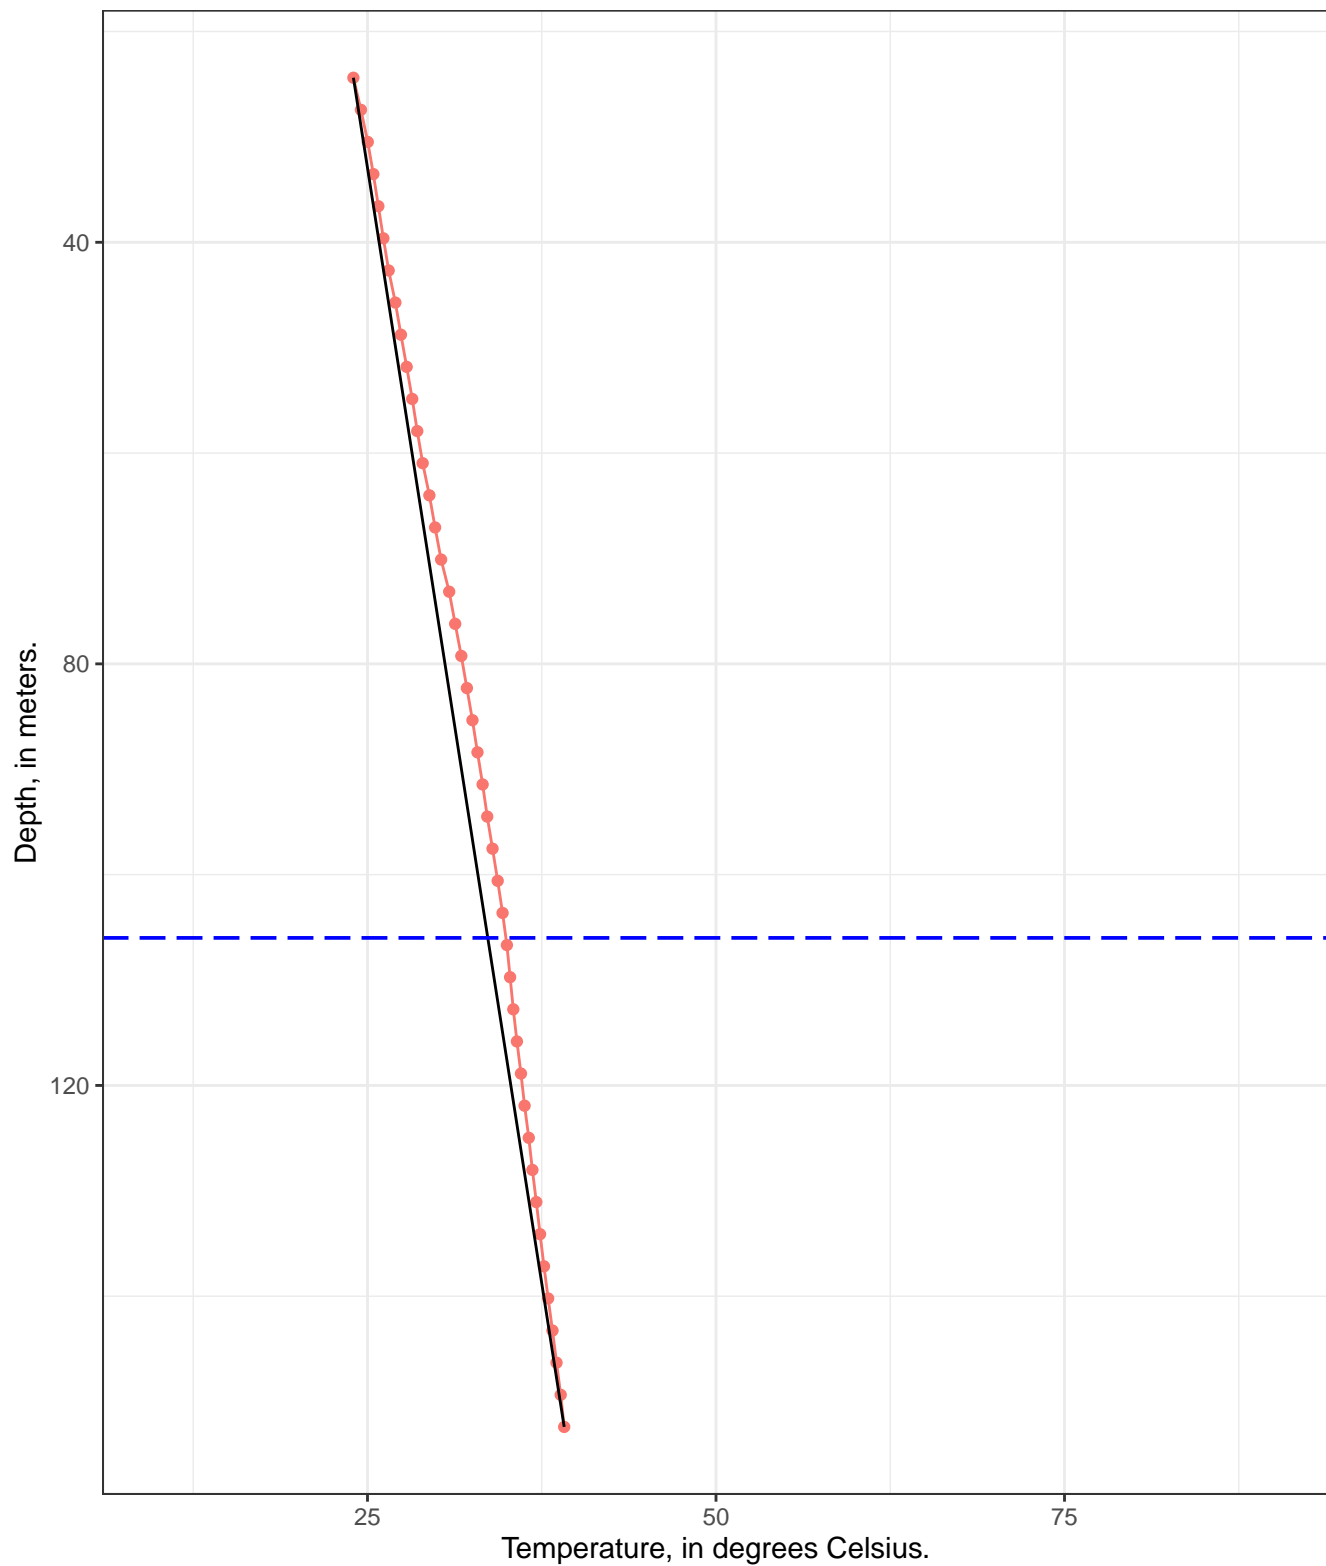

ID: 171 [H-6-78-1019\_KILBOURNE\_HOLE]

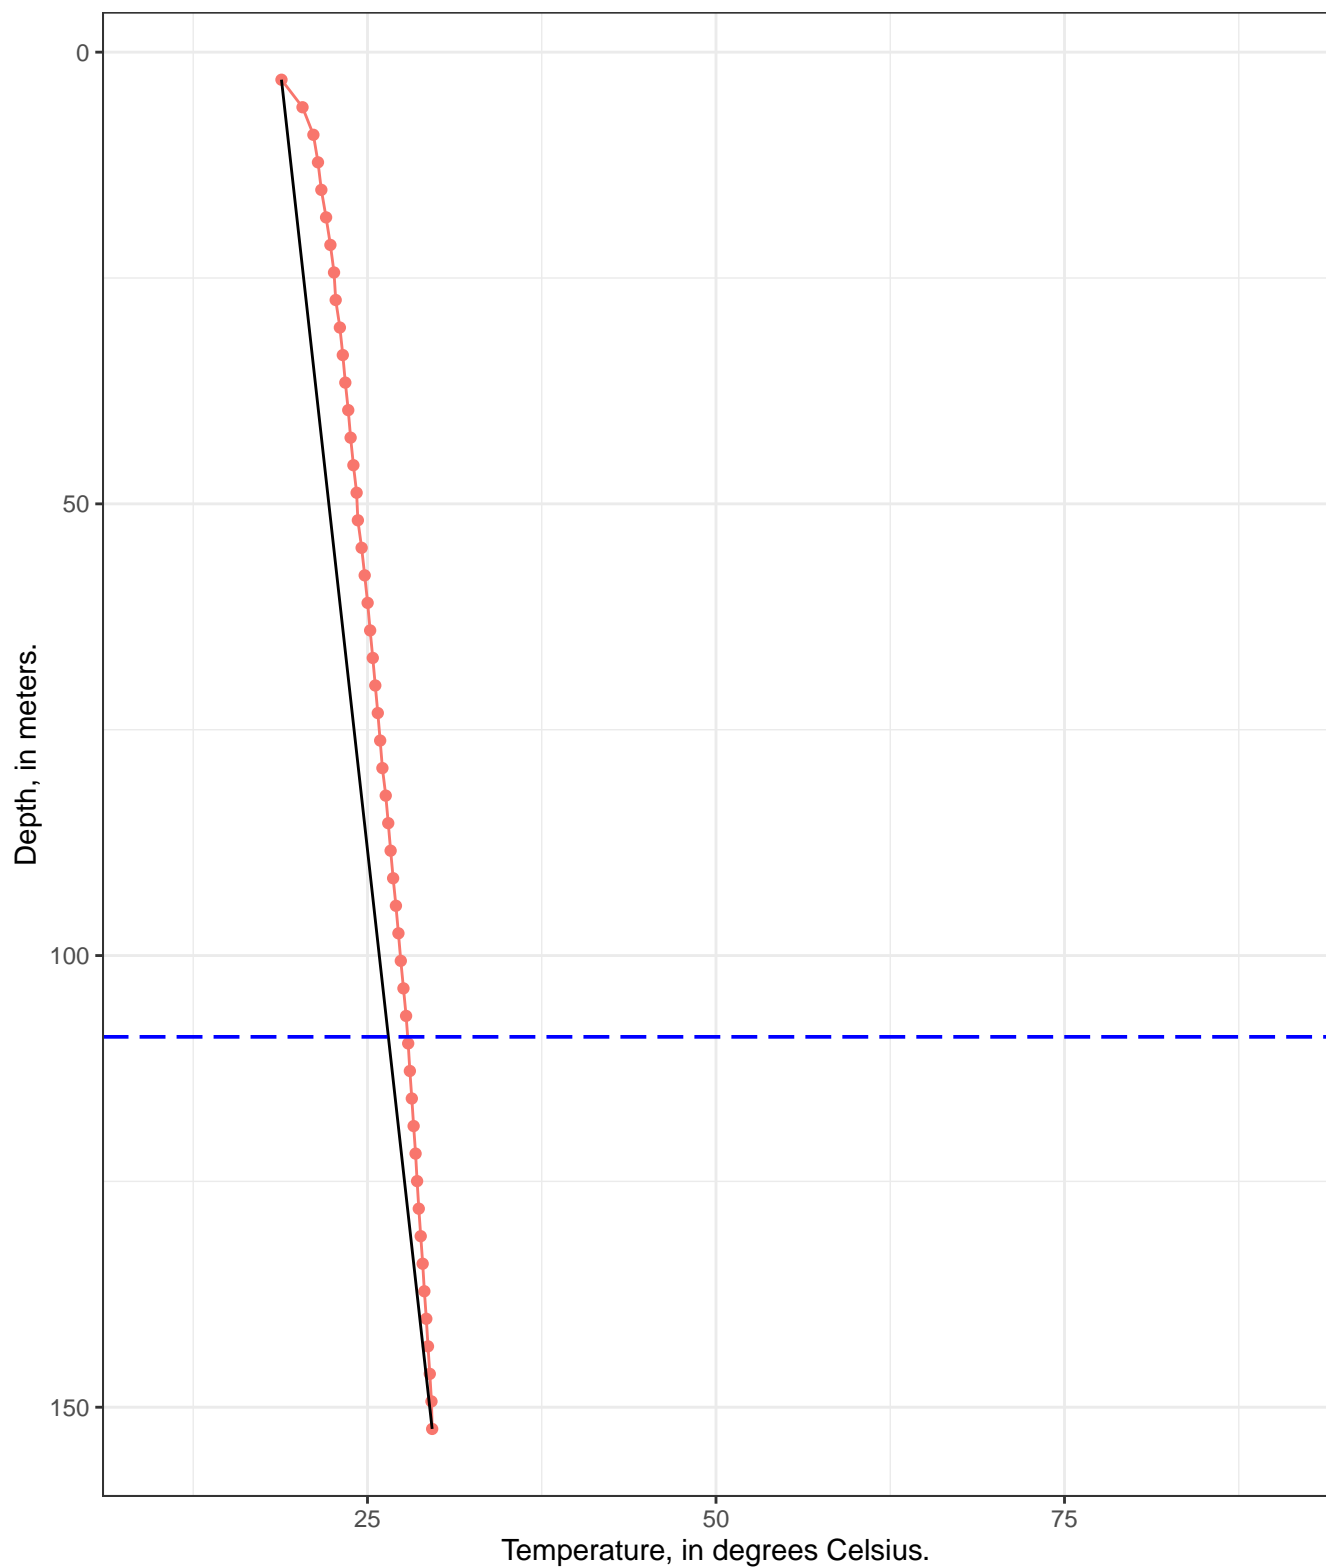

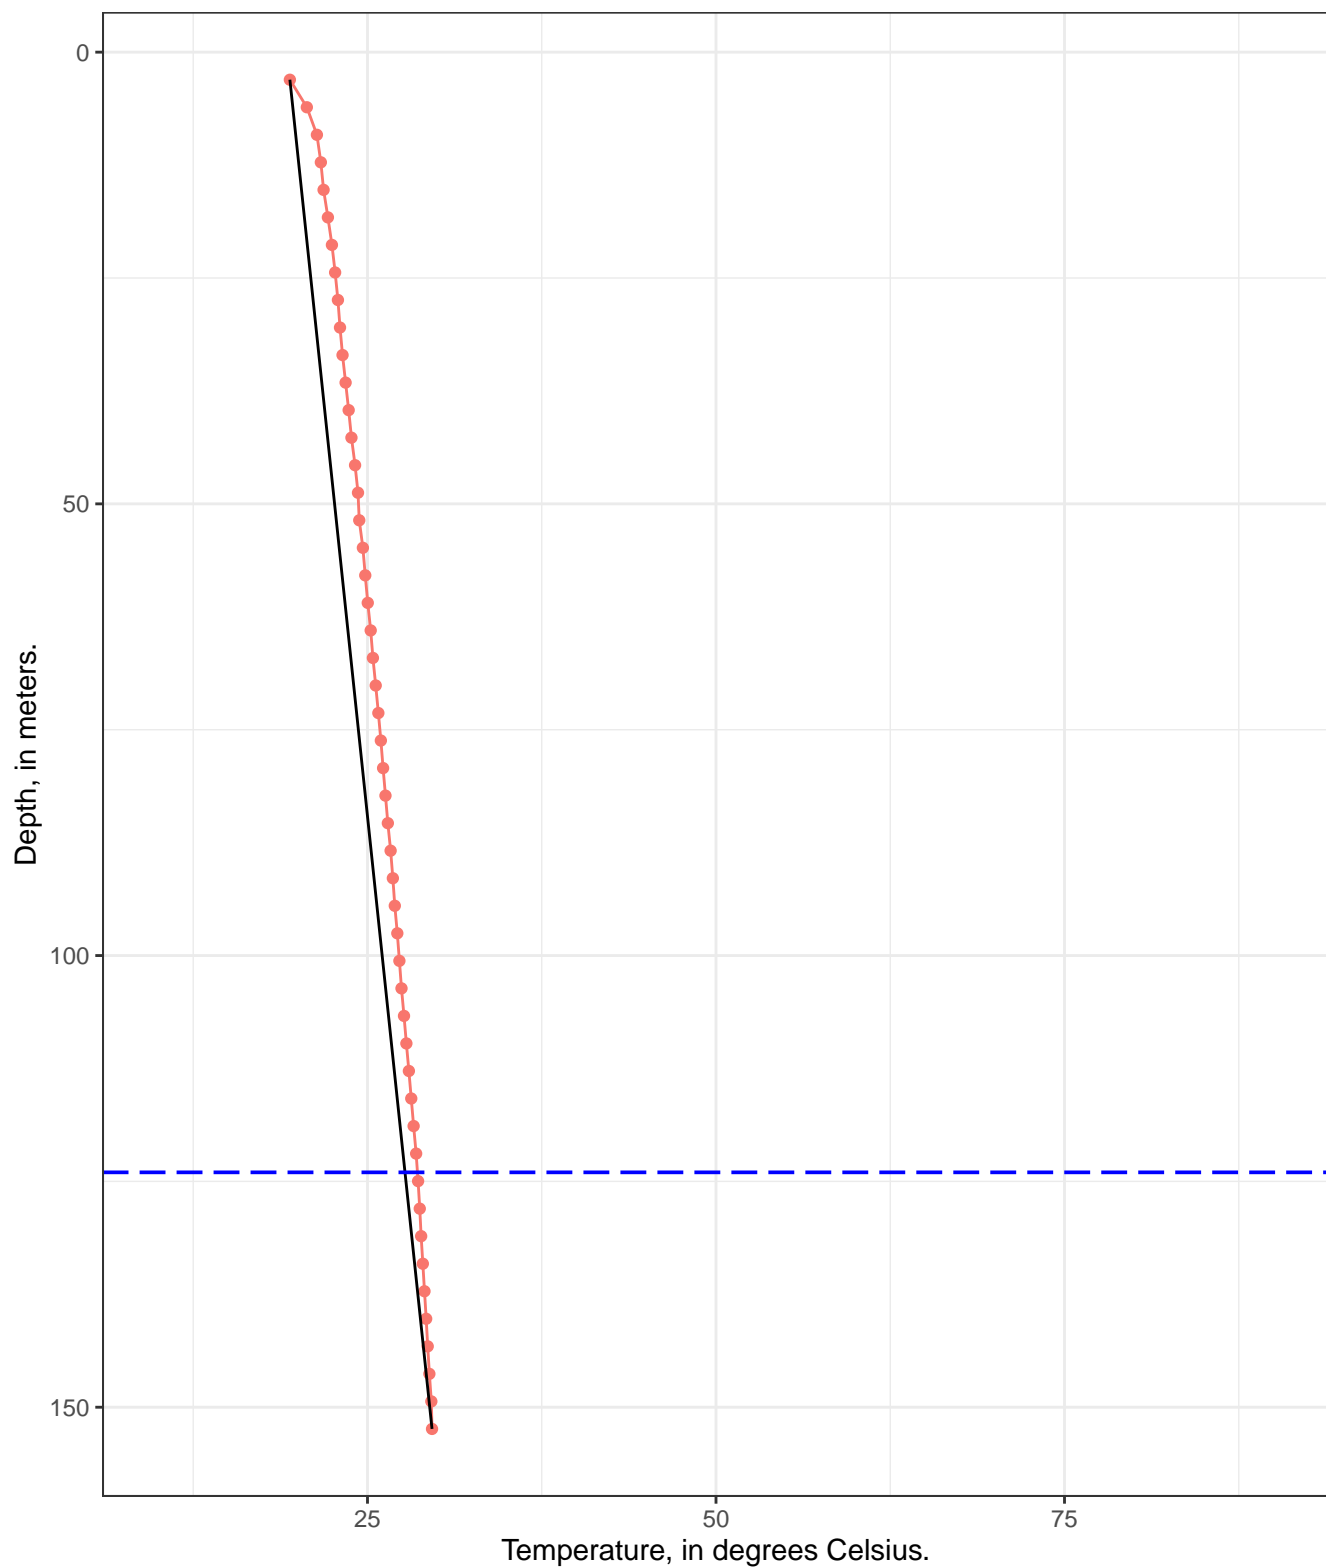

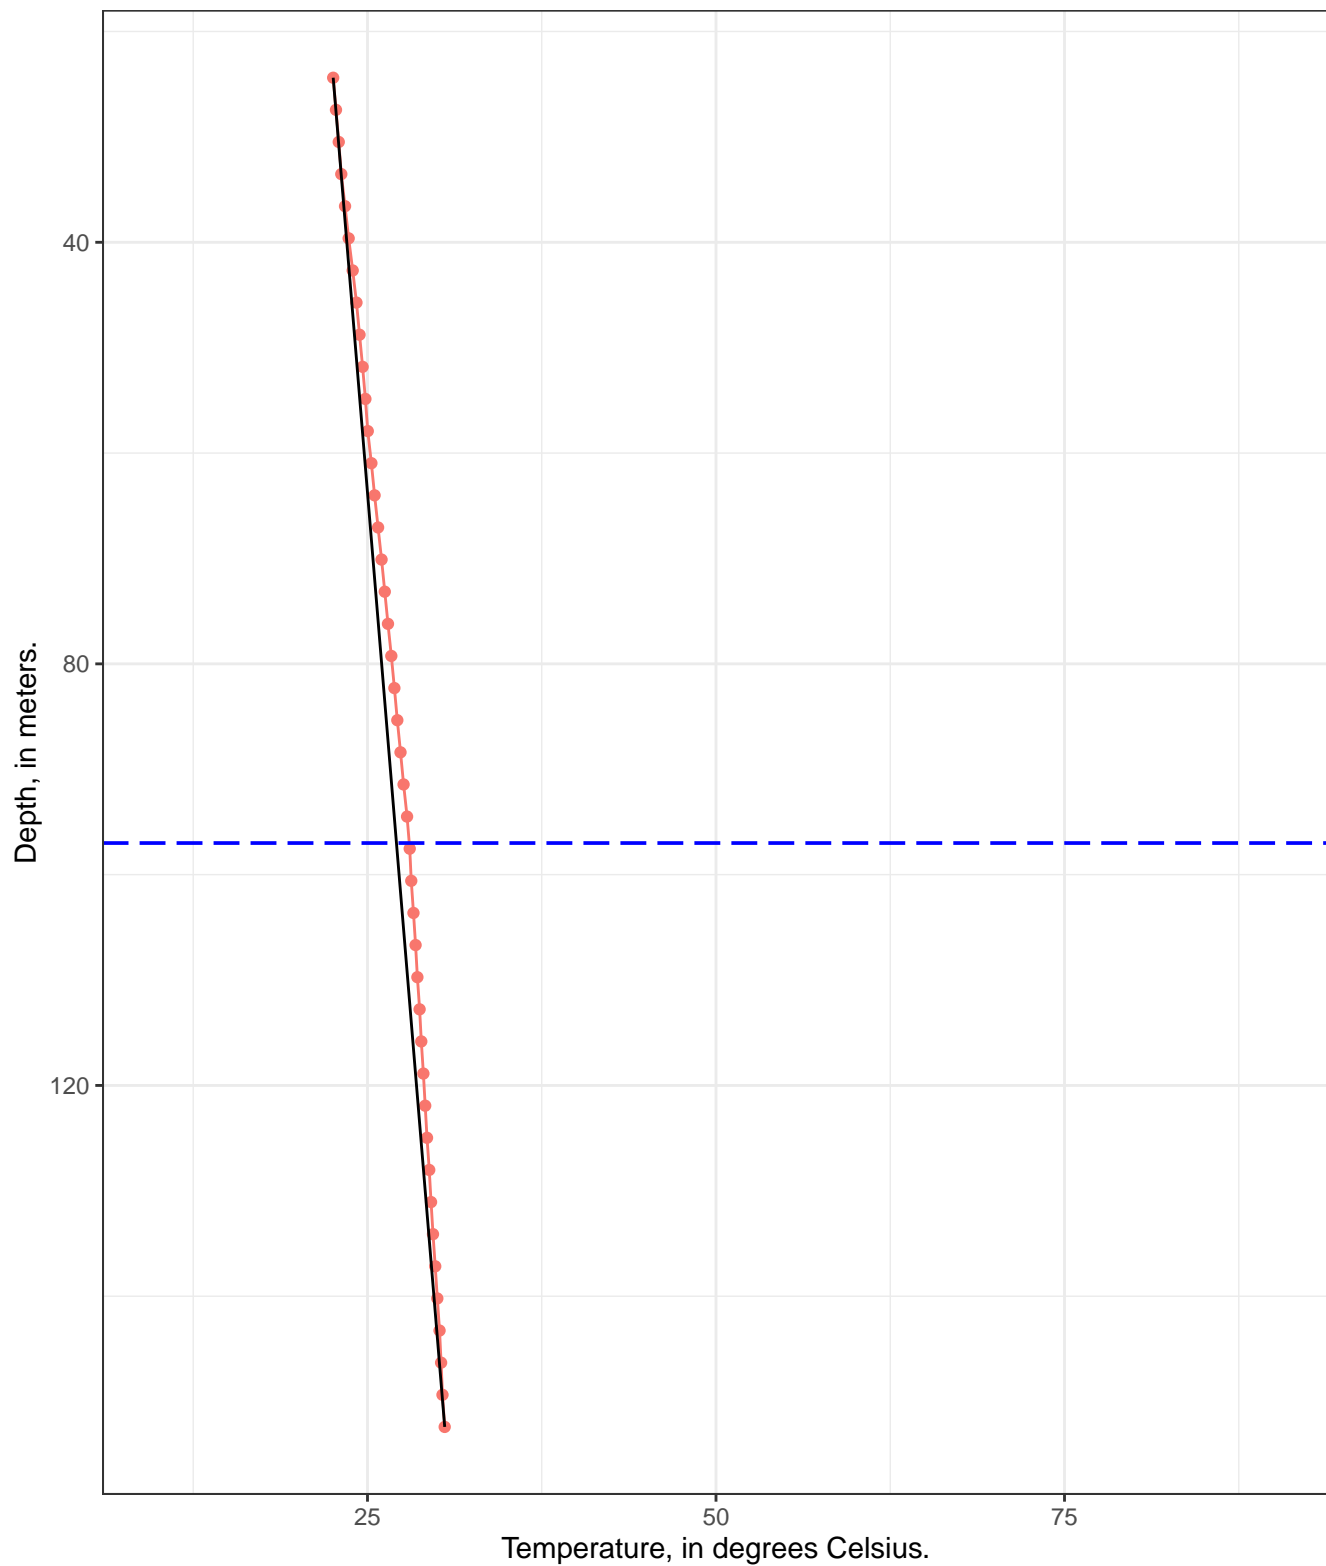

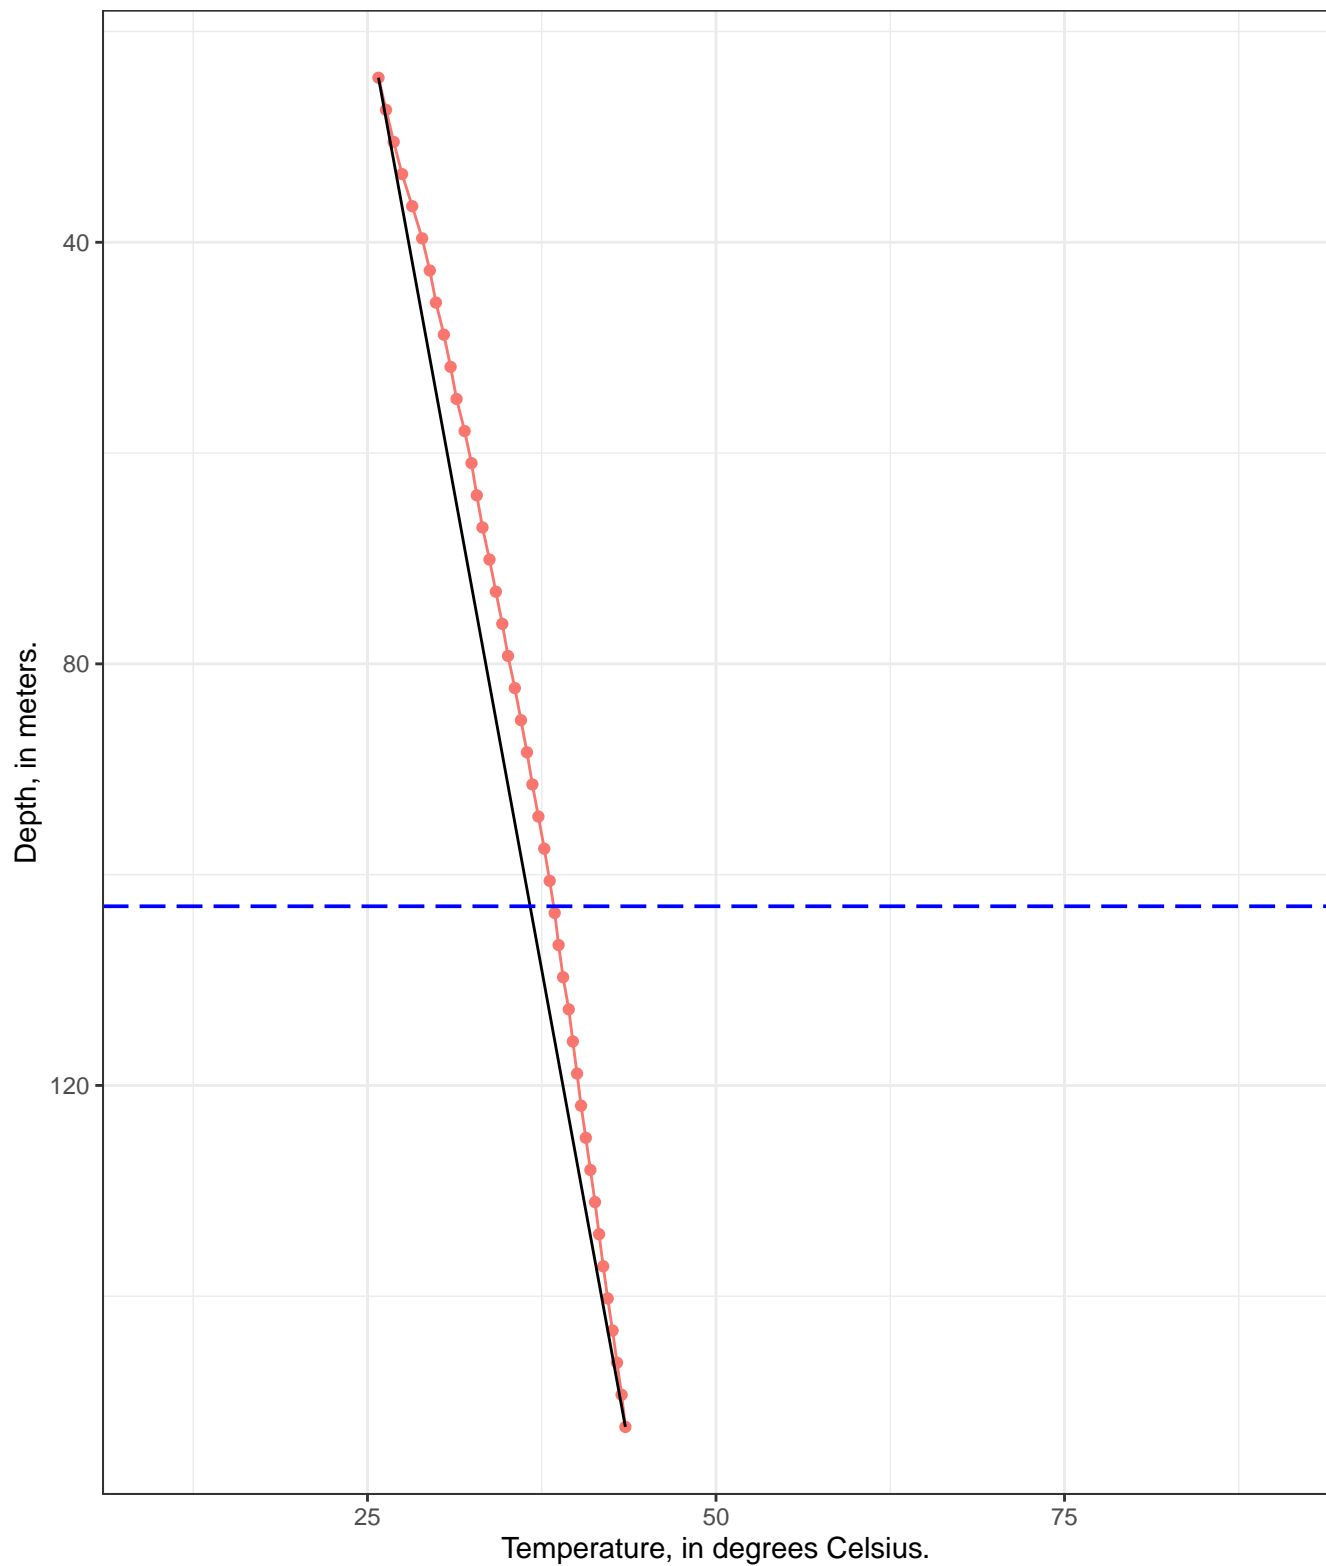

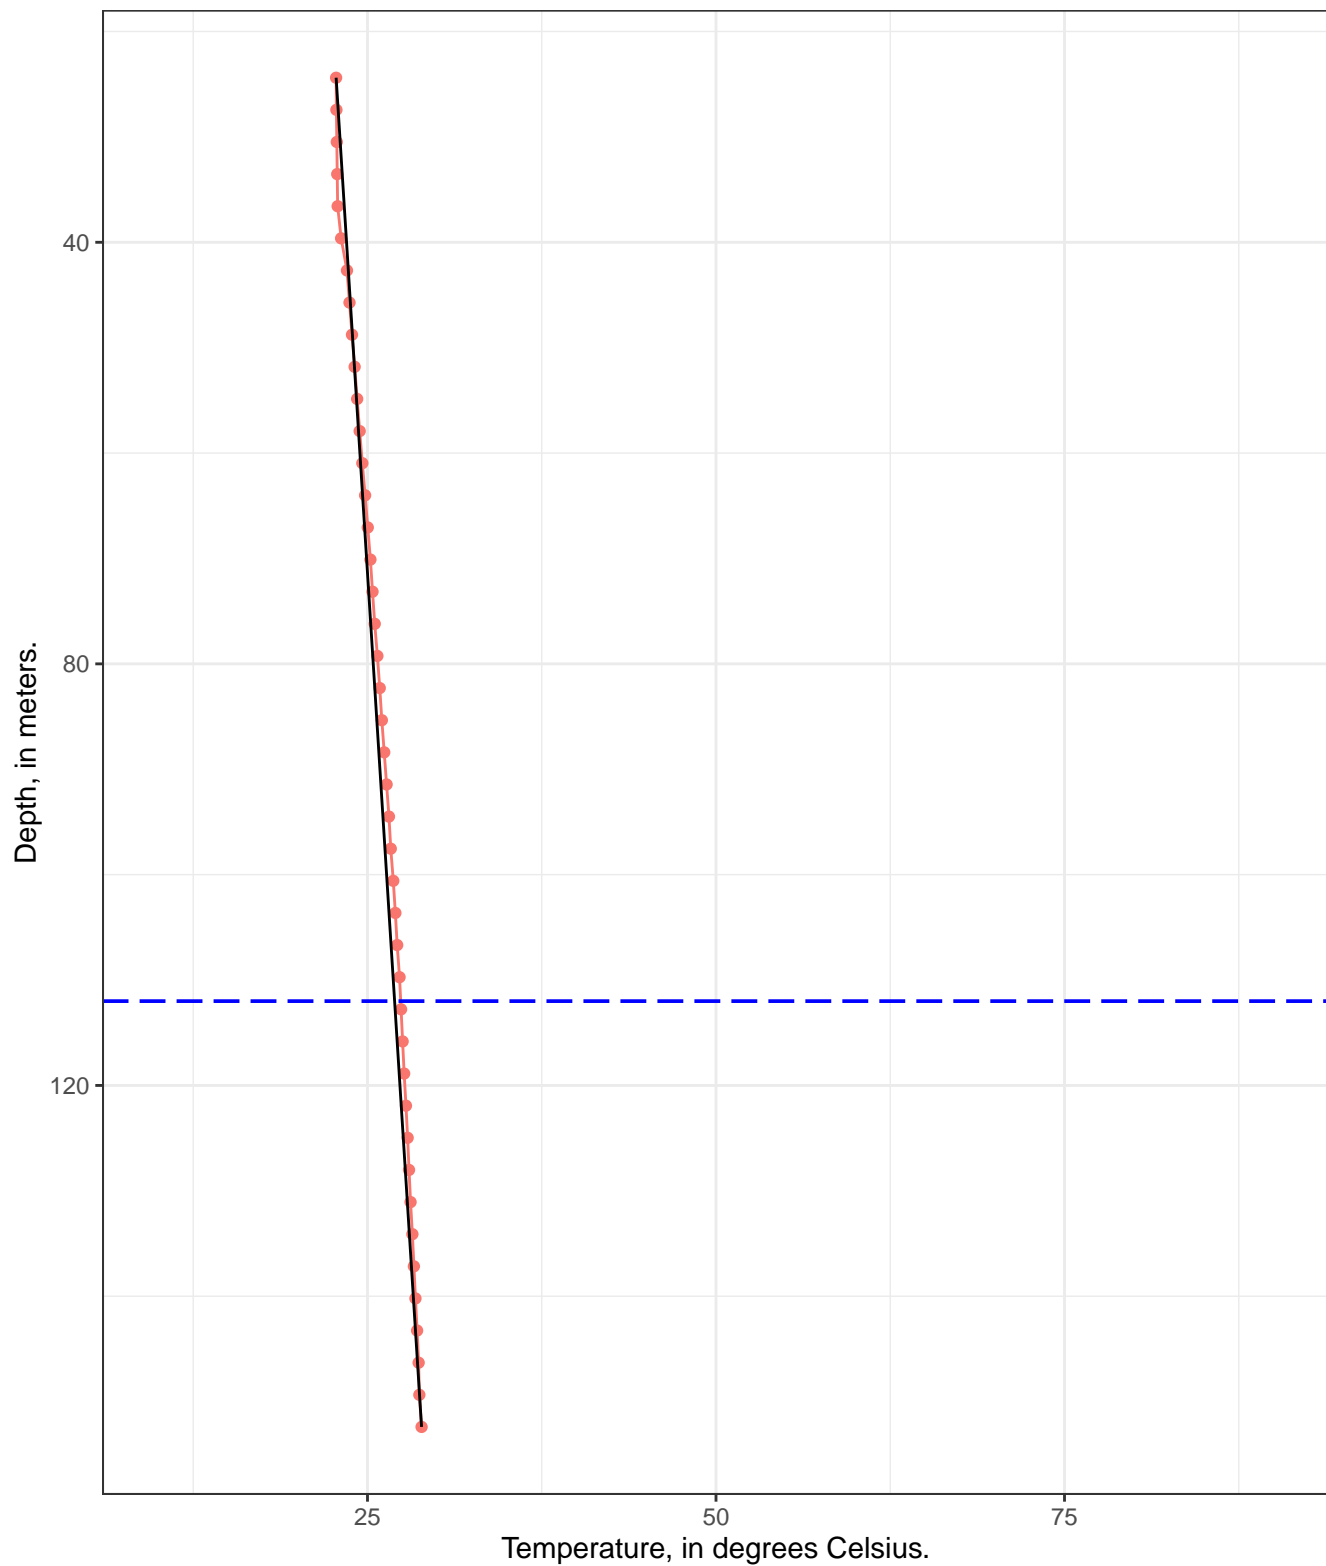



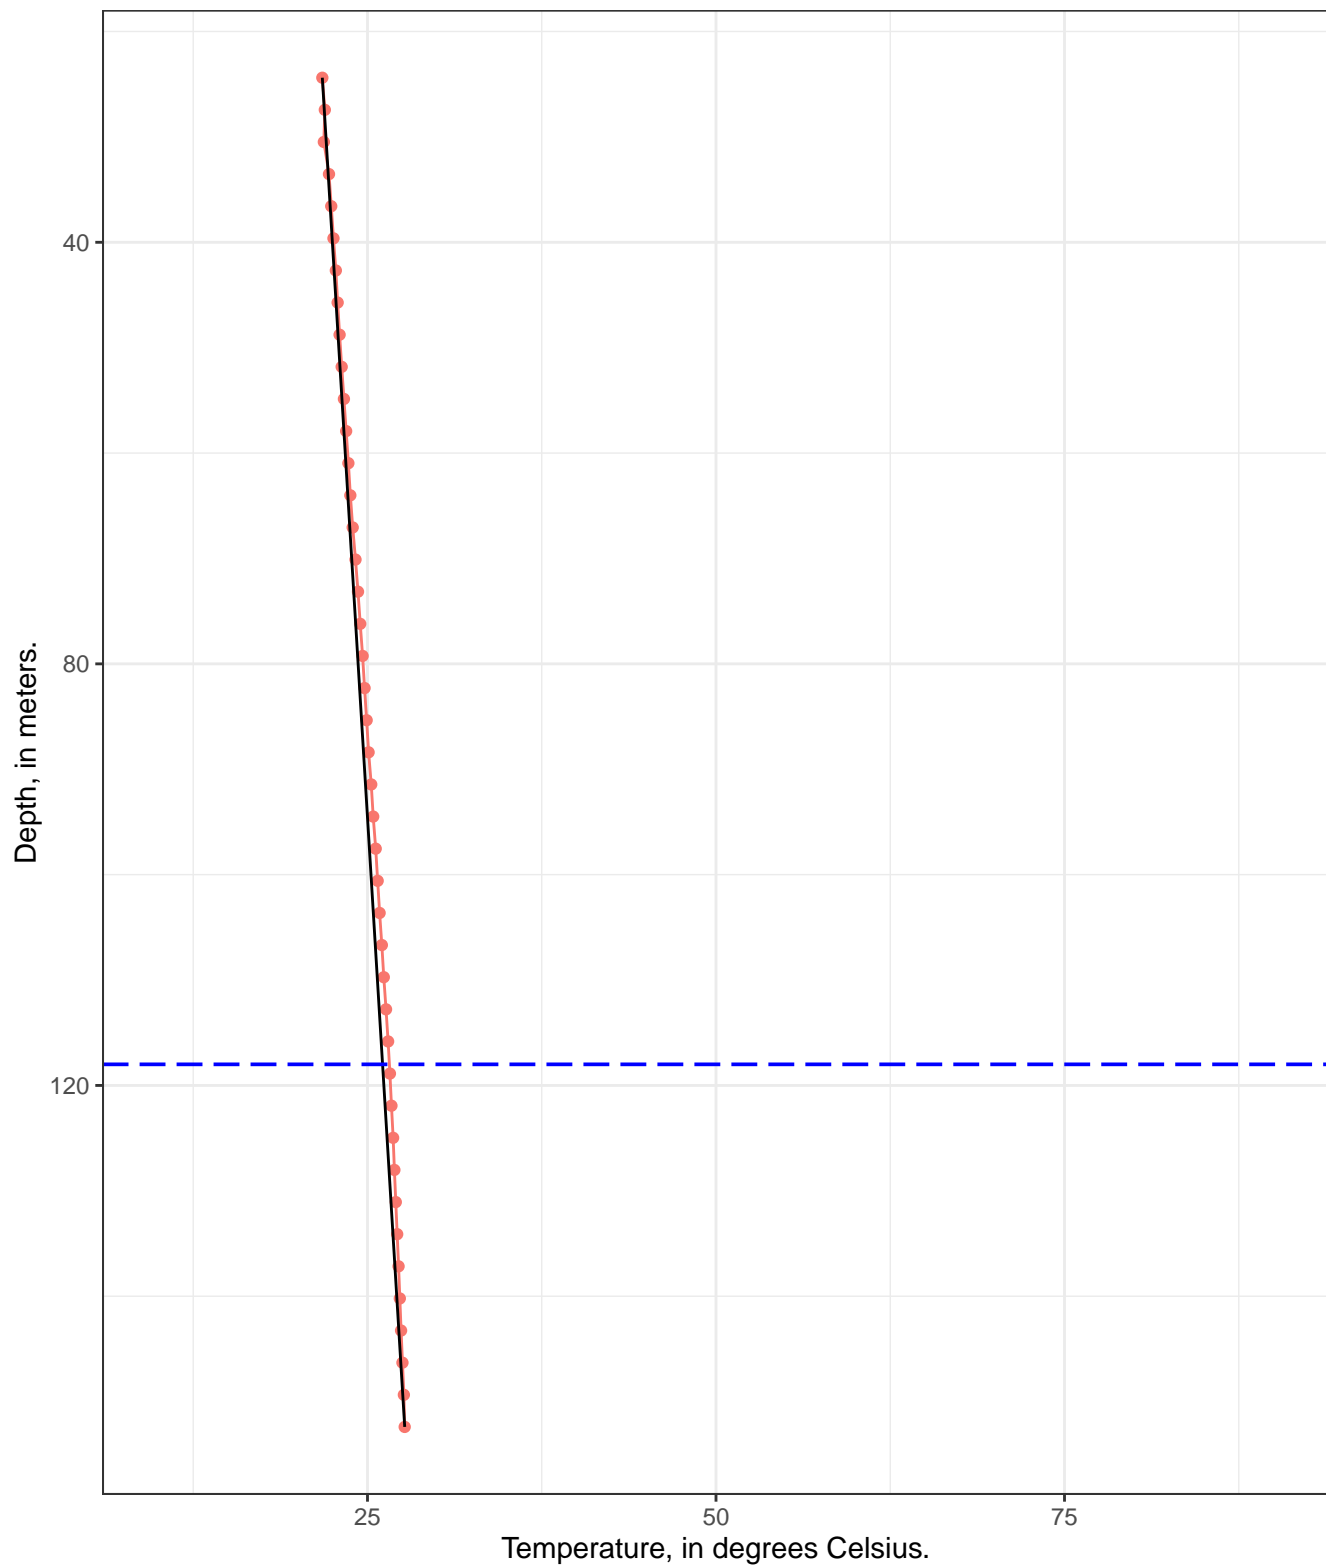

ID: 177 [H-6-78-1033\_KILBOURNE\_HOLE]

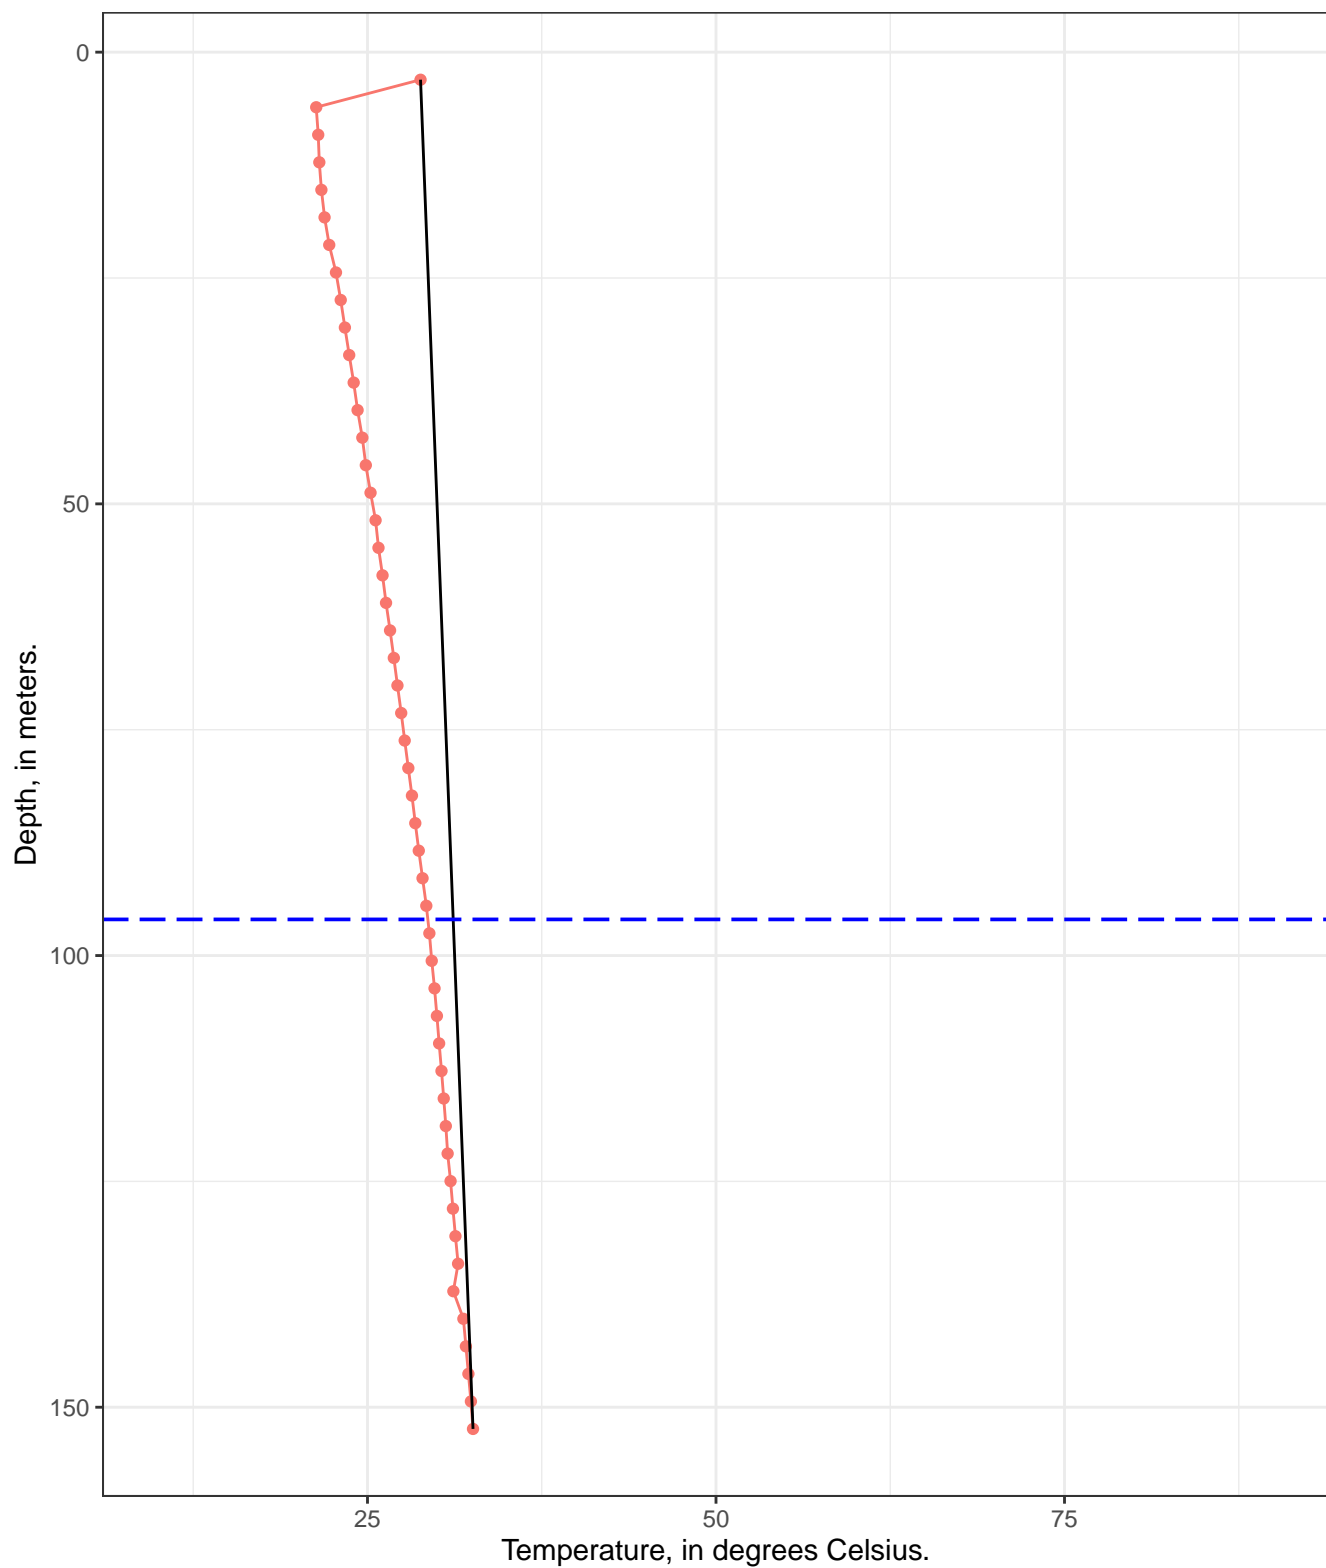

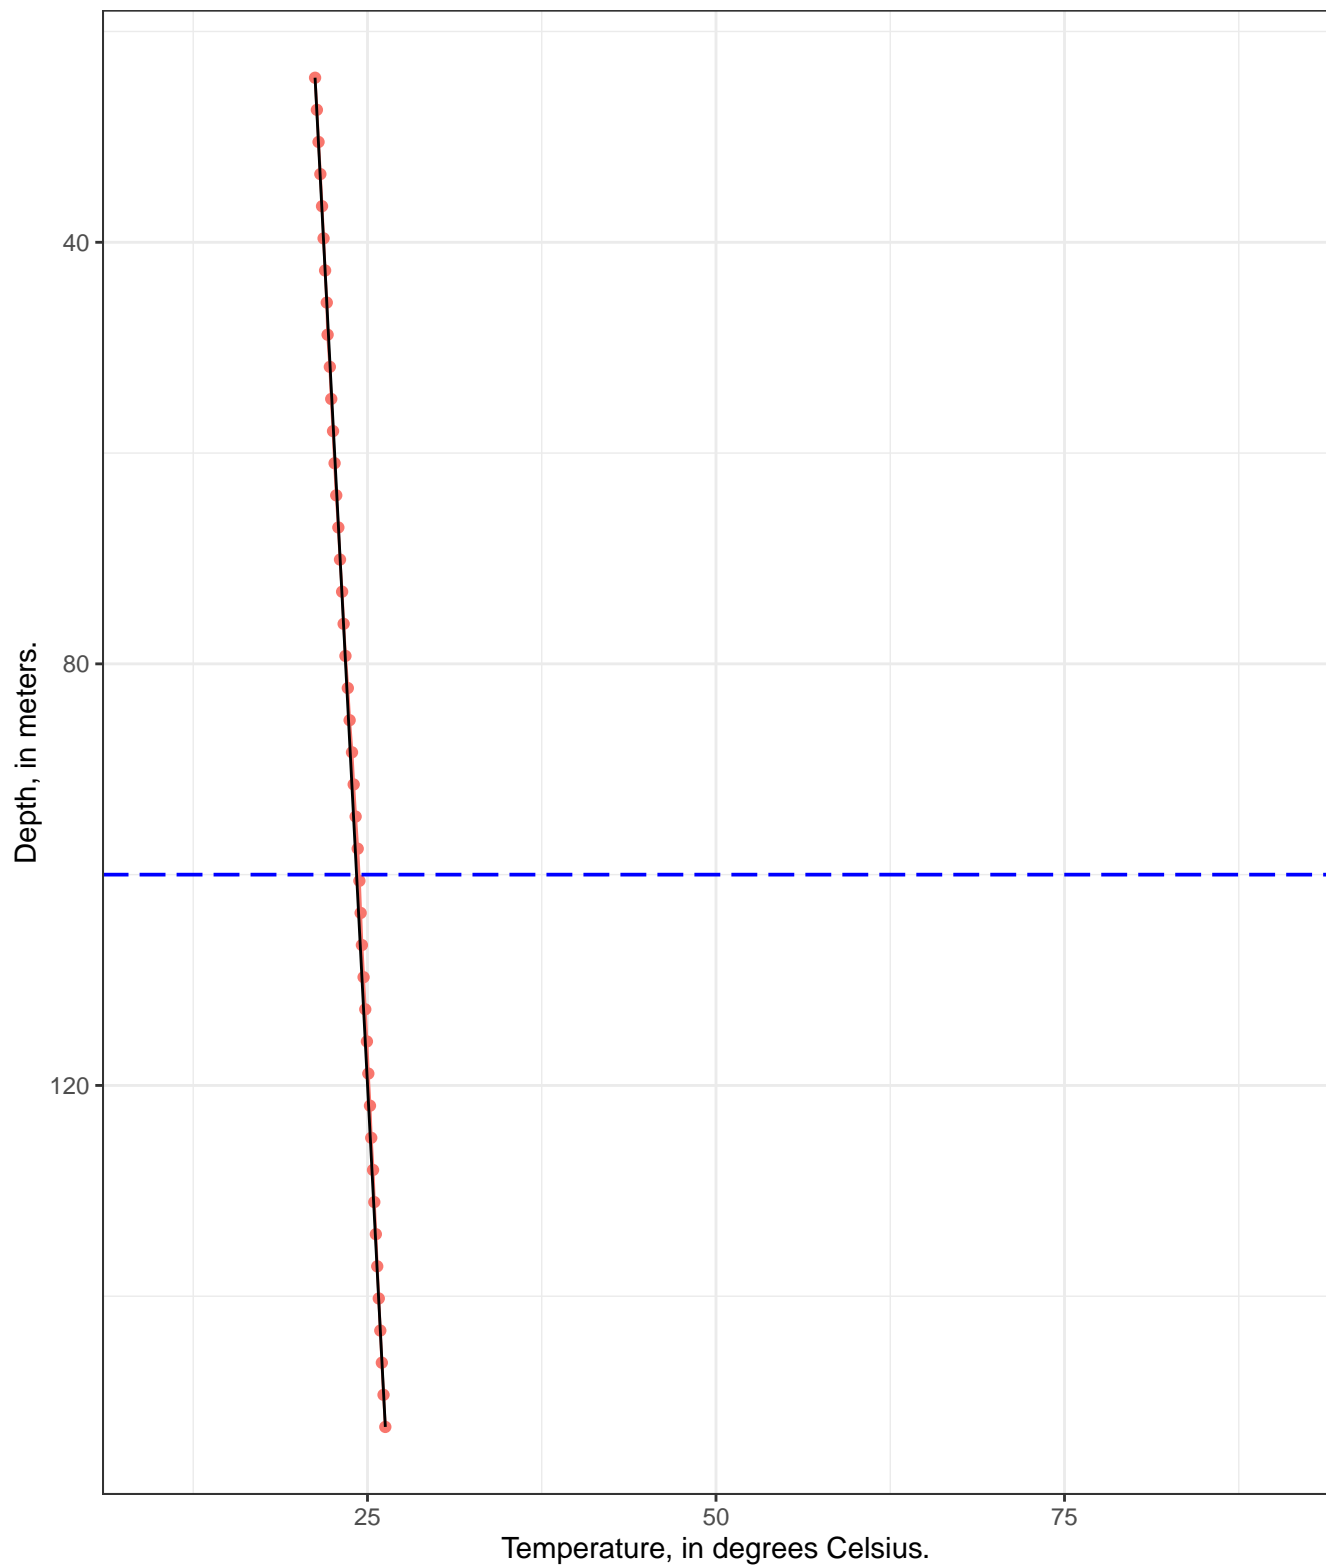

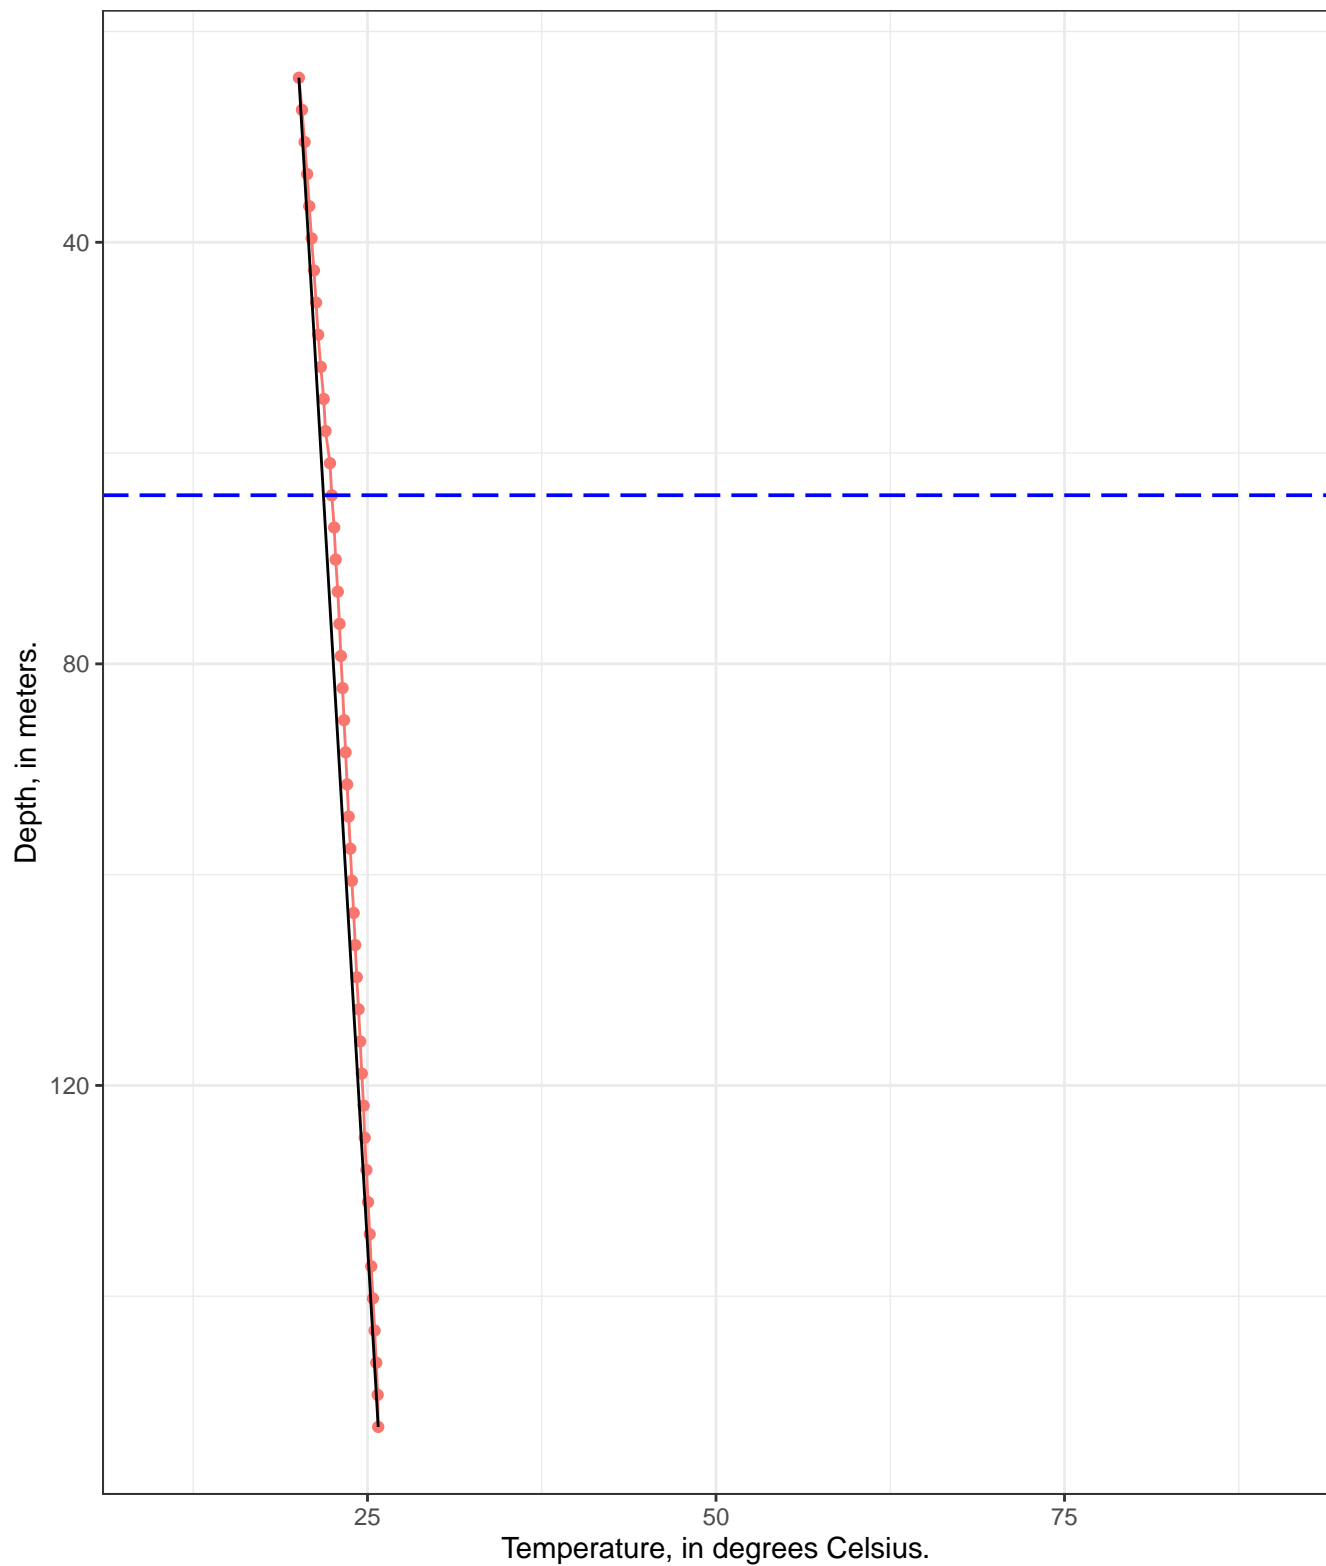

ID: 180 [HA\_Well]

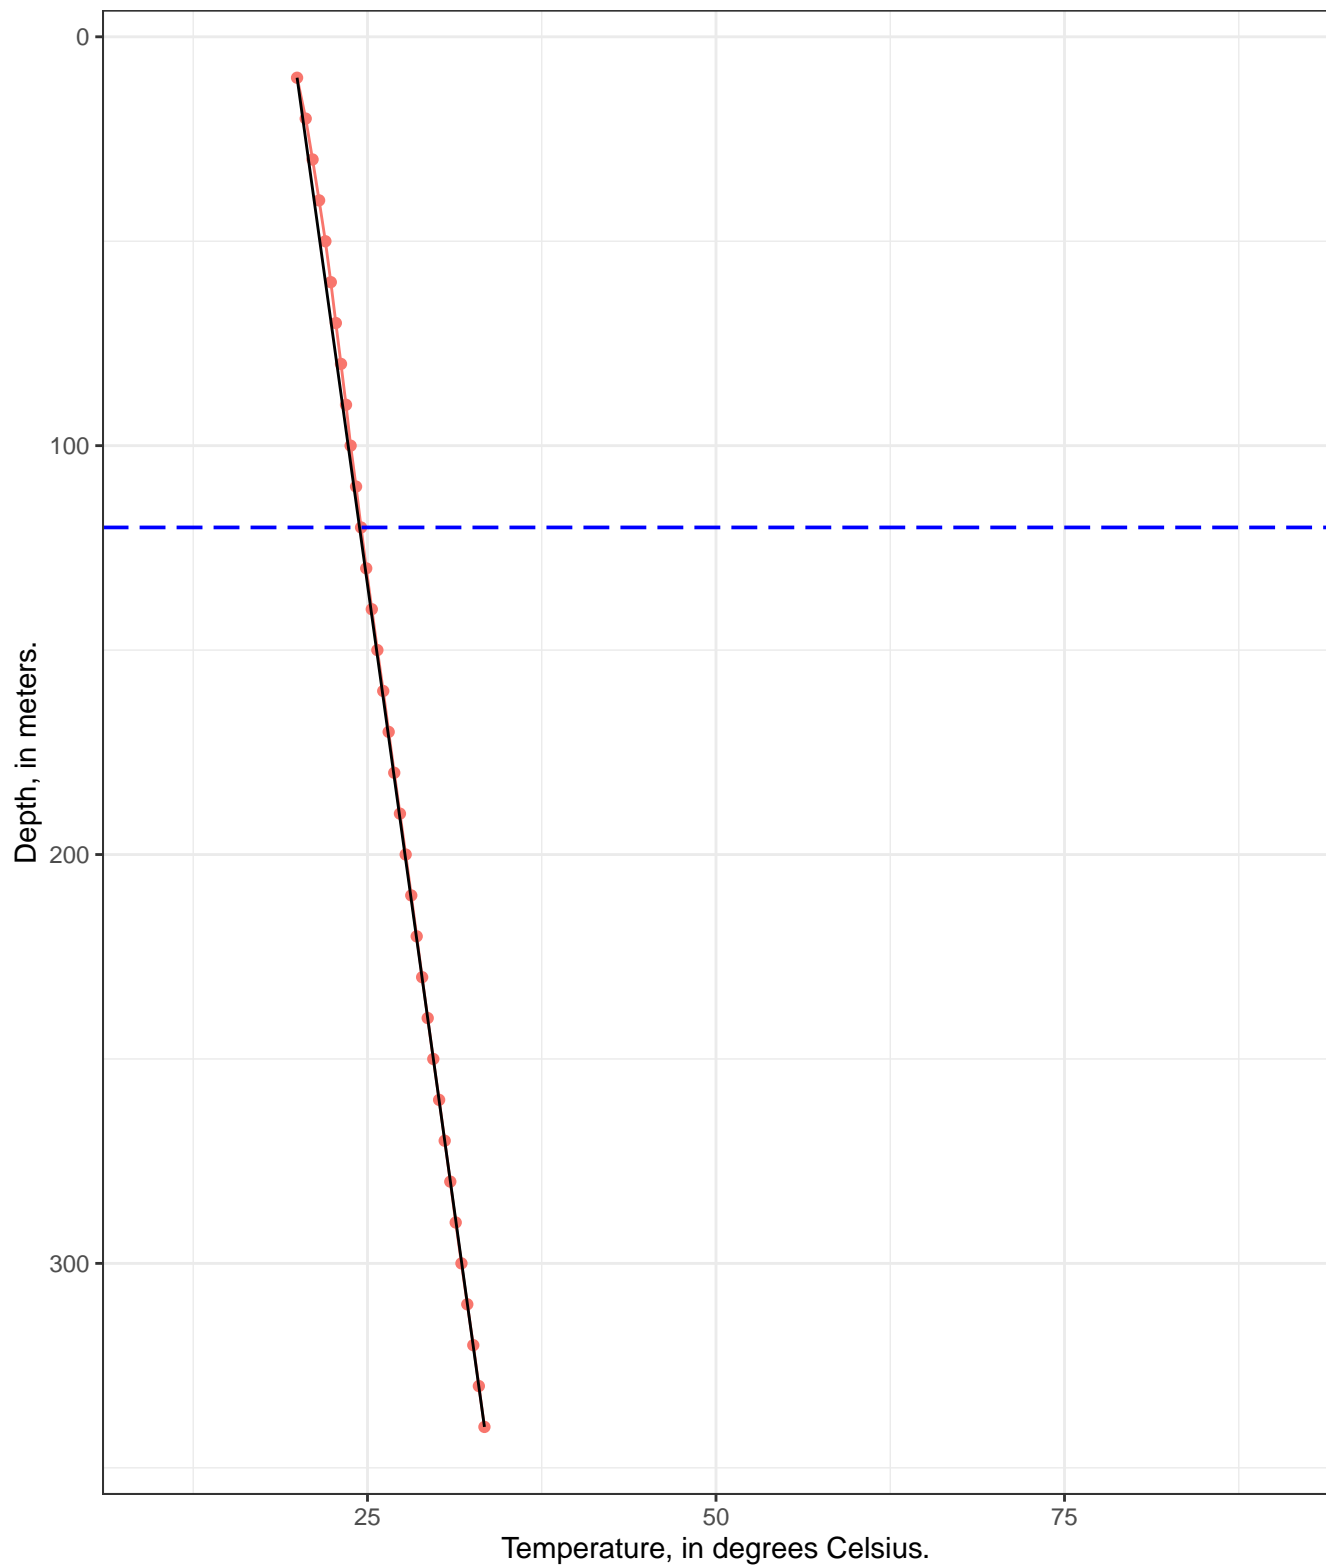

ID: 181 [Hole\_1]

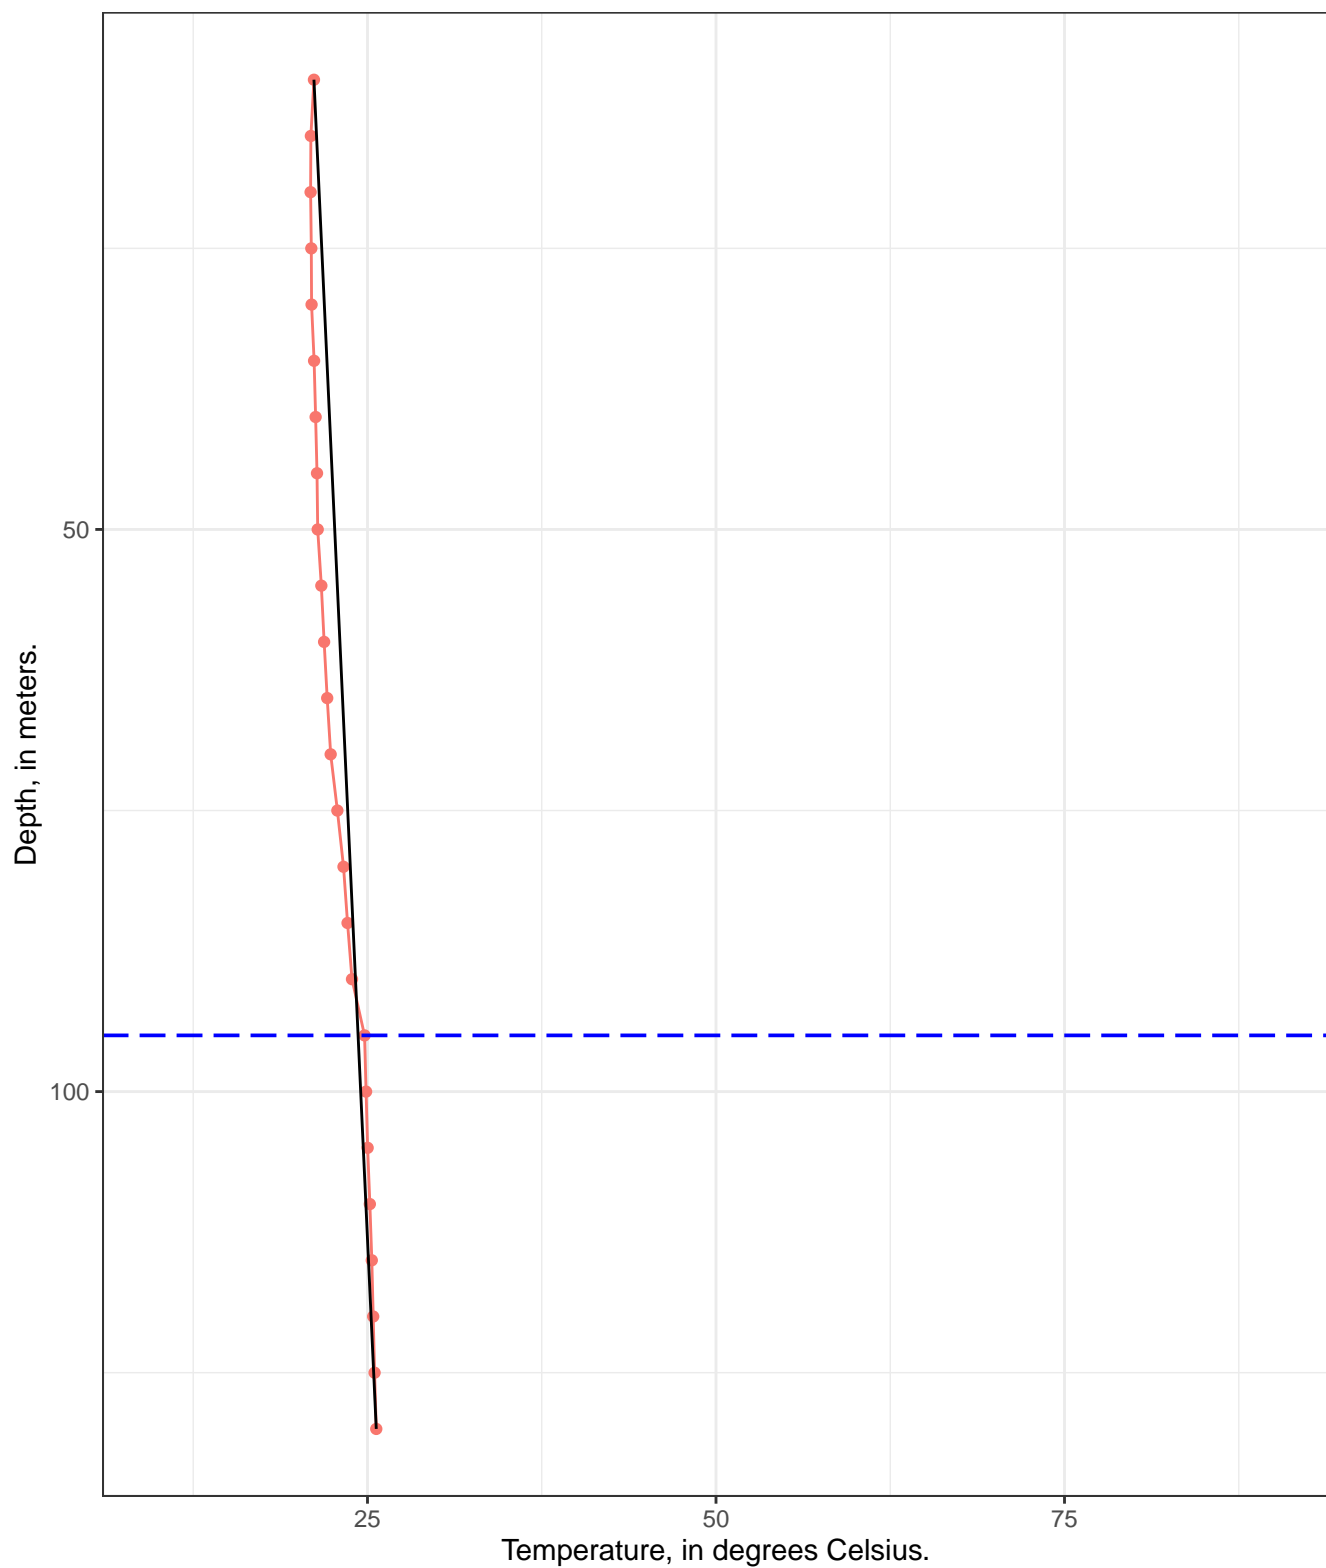

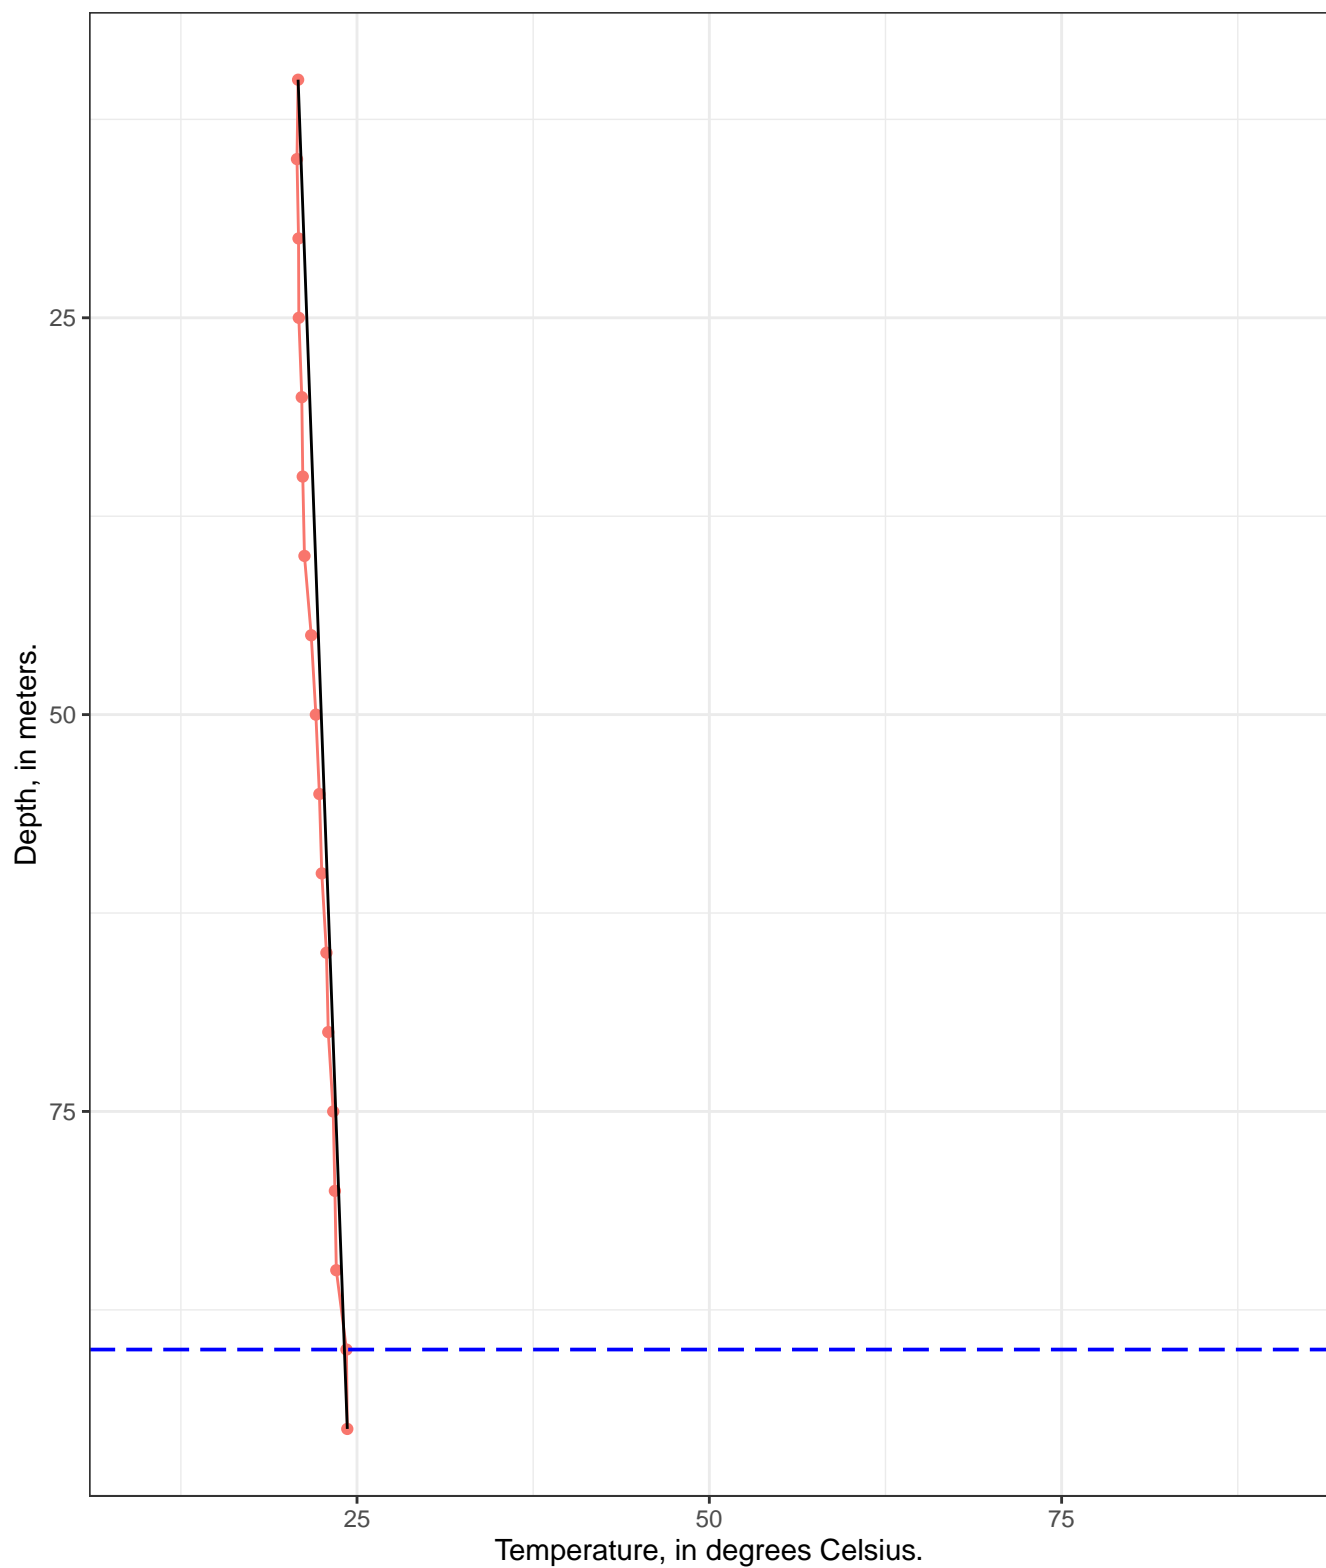

ID: 183 [Hole\_3]

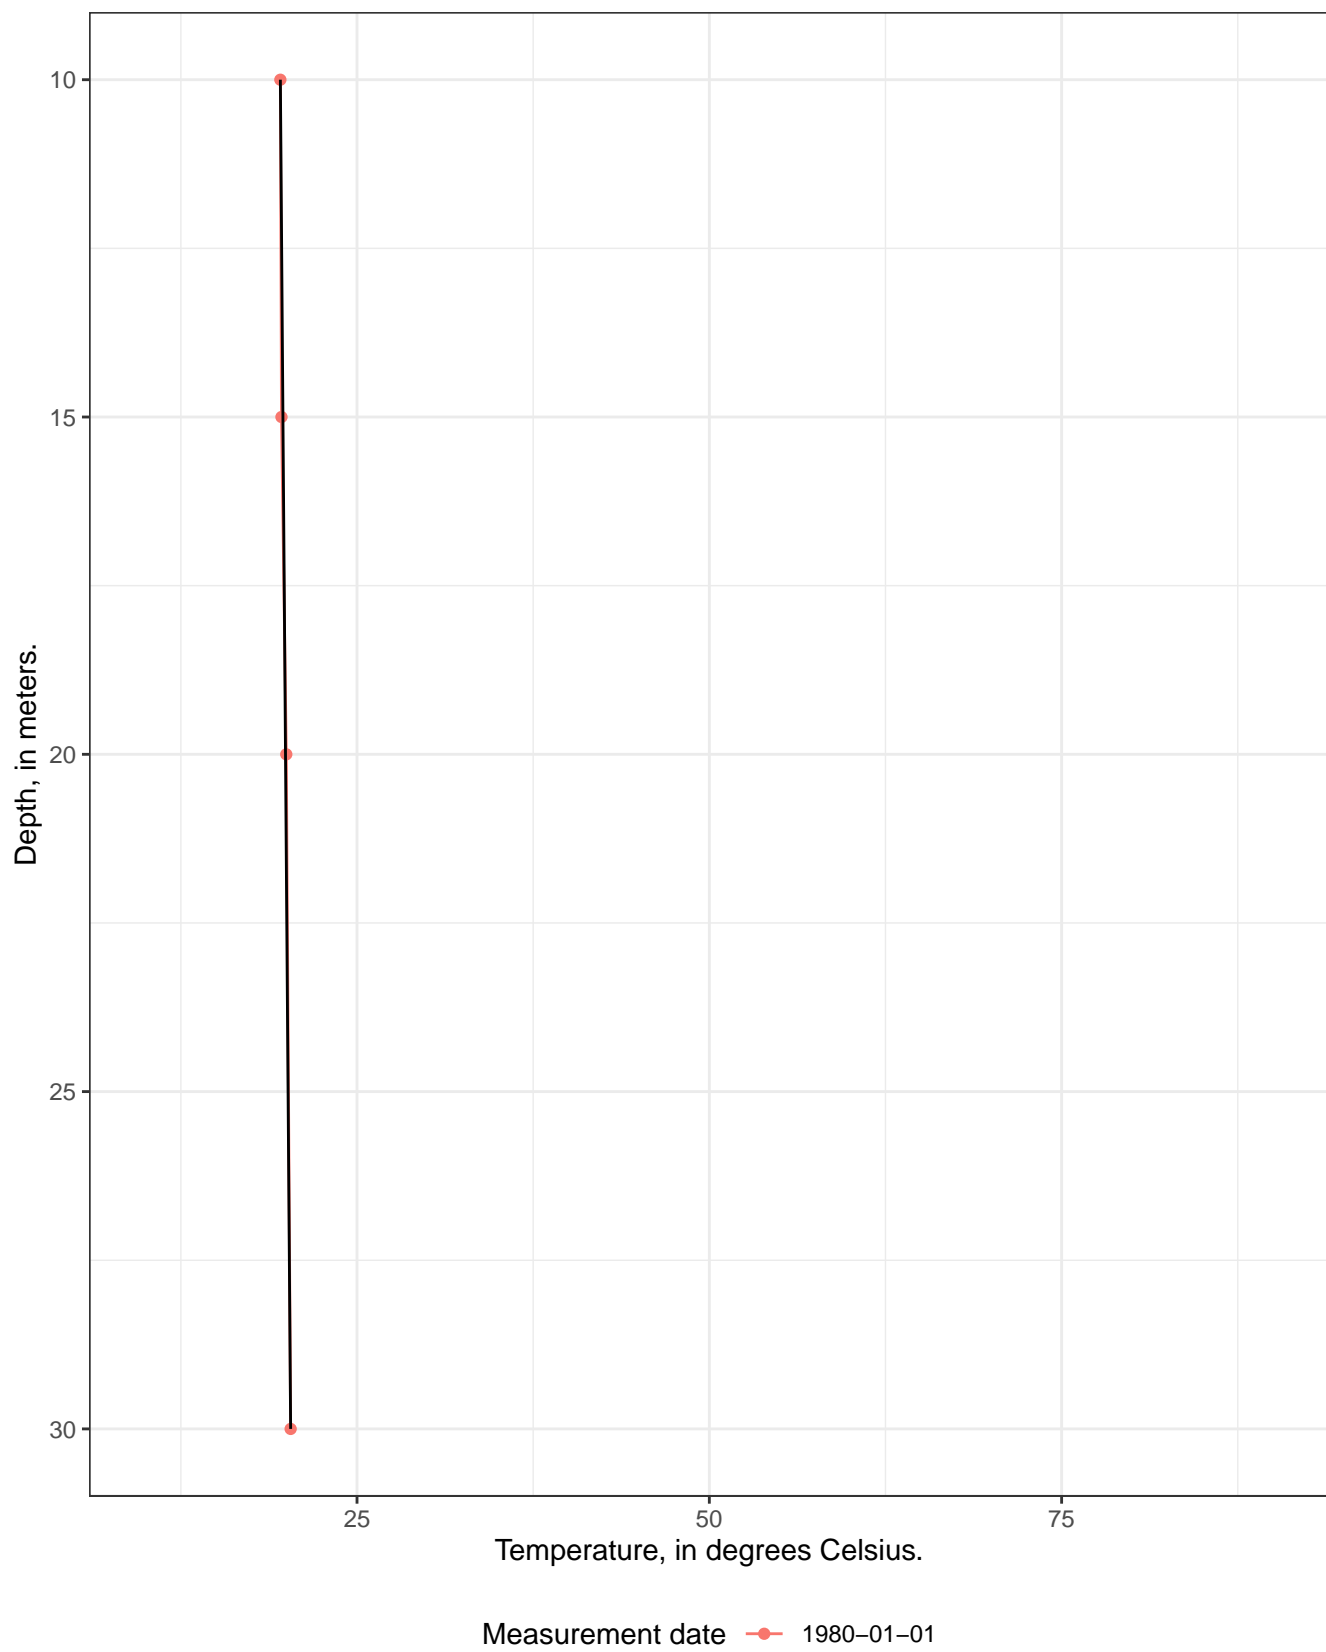



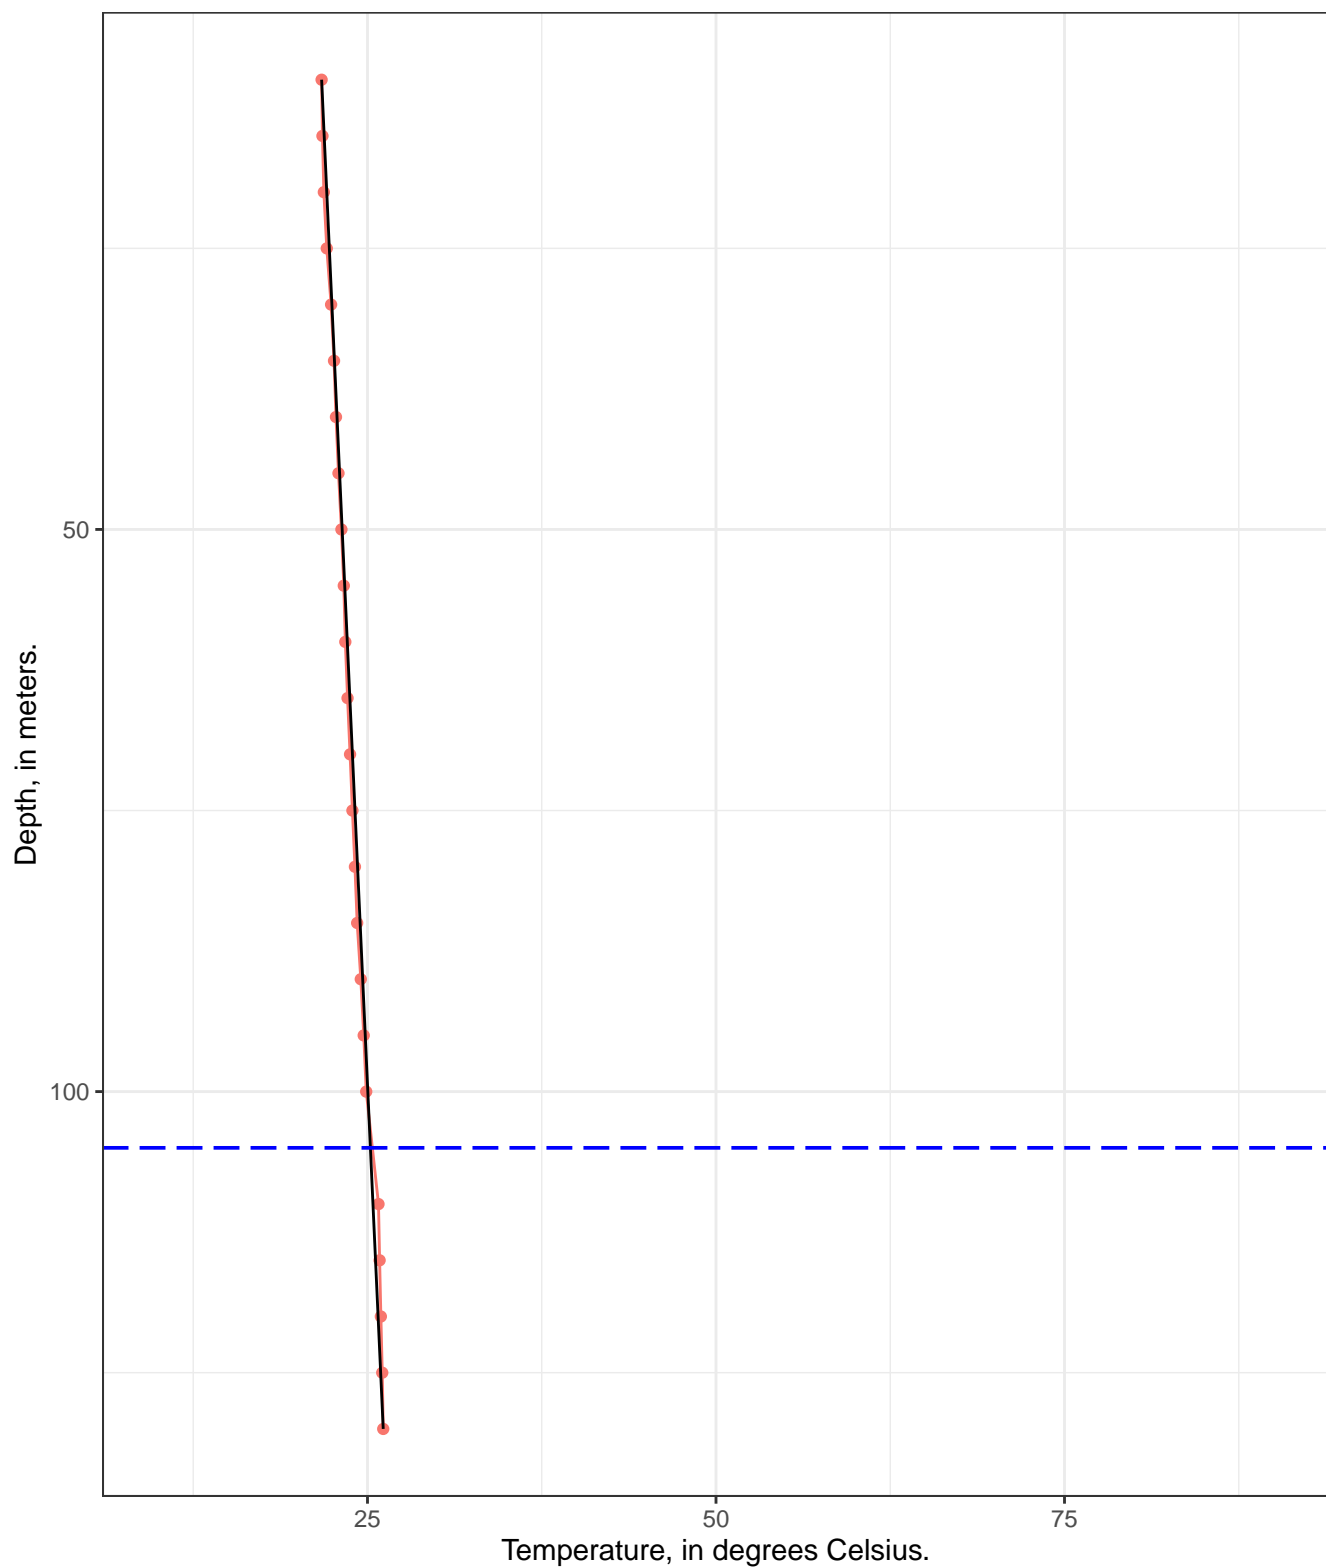

ID: 185 [Hole\_5]

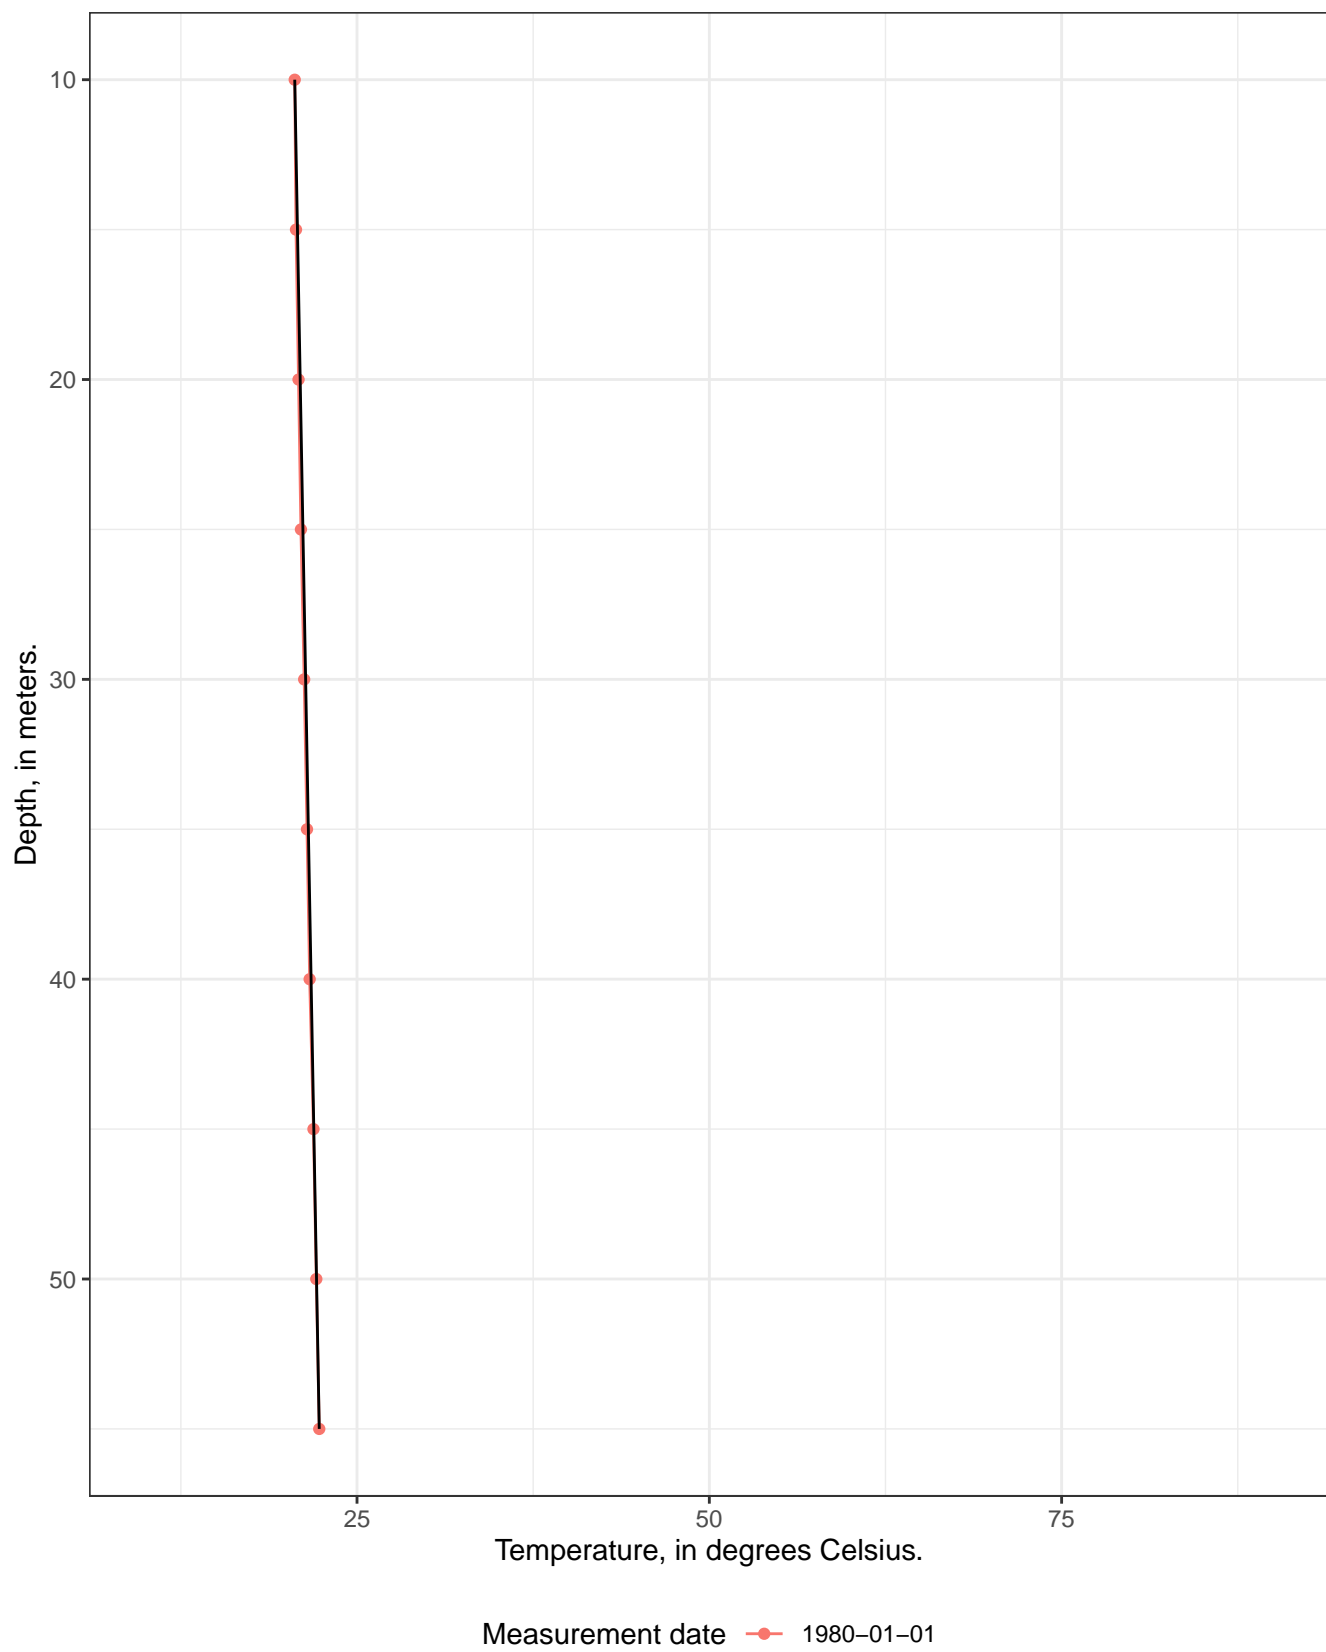

ID: 186 [ISC-1D]

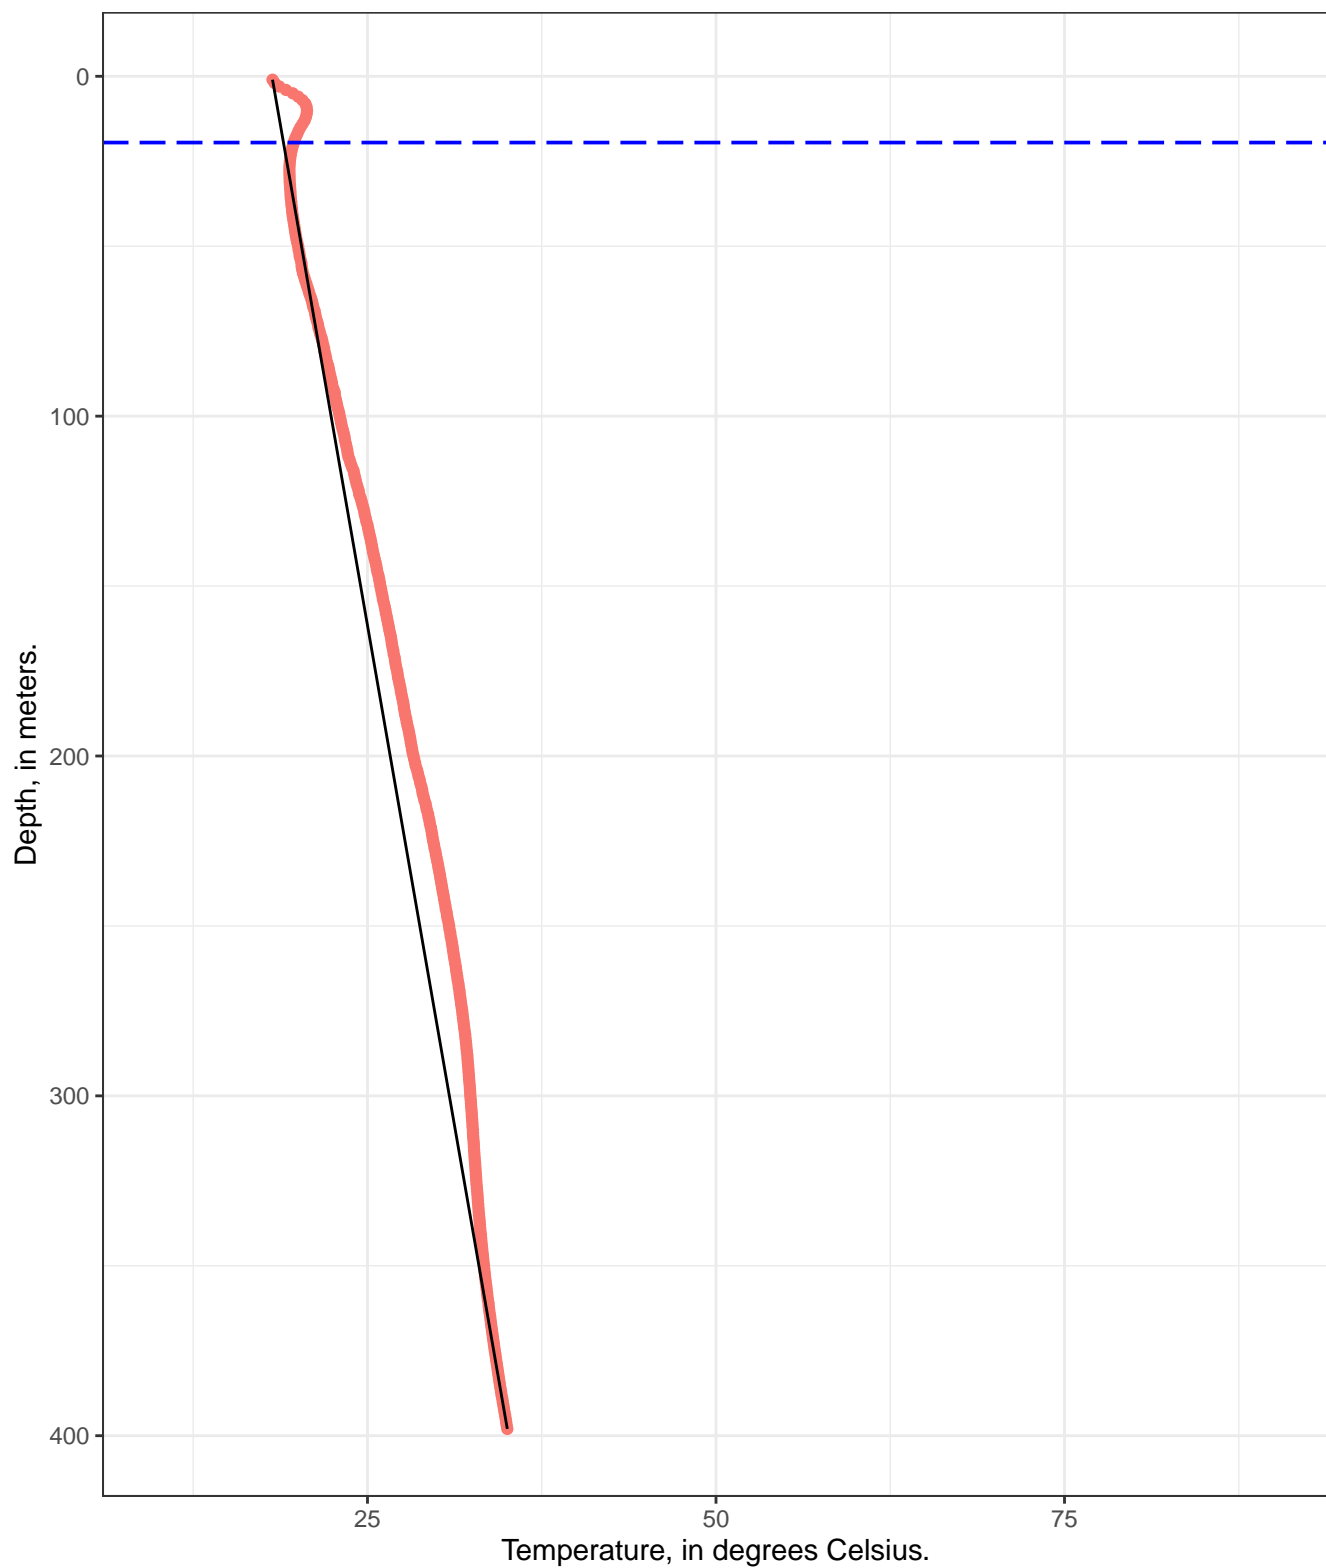

Measurement date 2018-02-23

ID: 187 [ISC-2\_160]

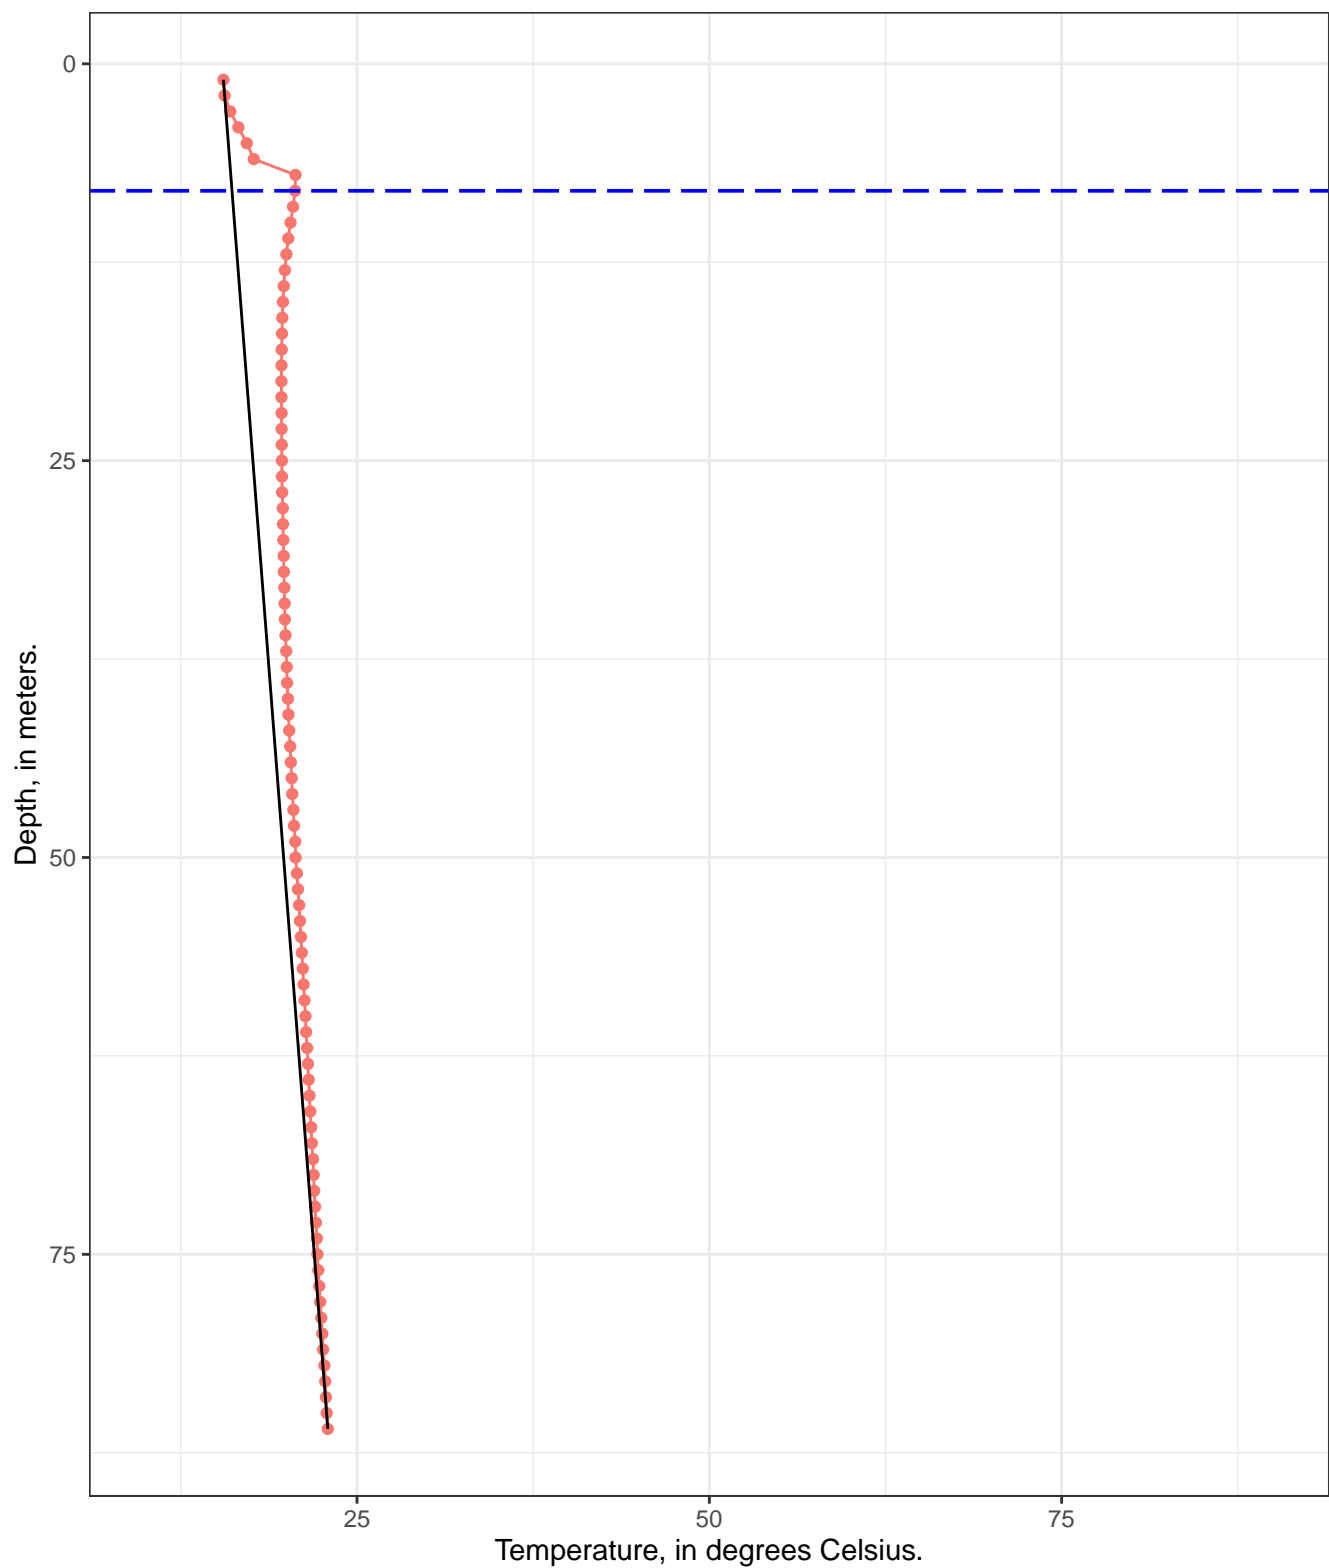

Measurement date 2018-02-23

ID: 188 [ISC-4A]

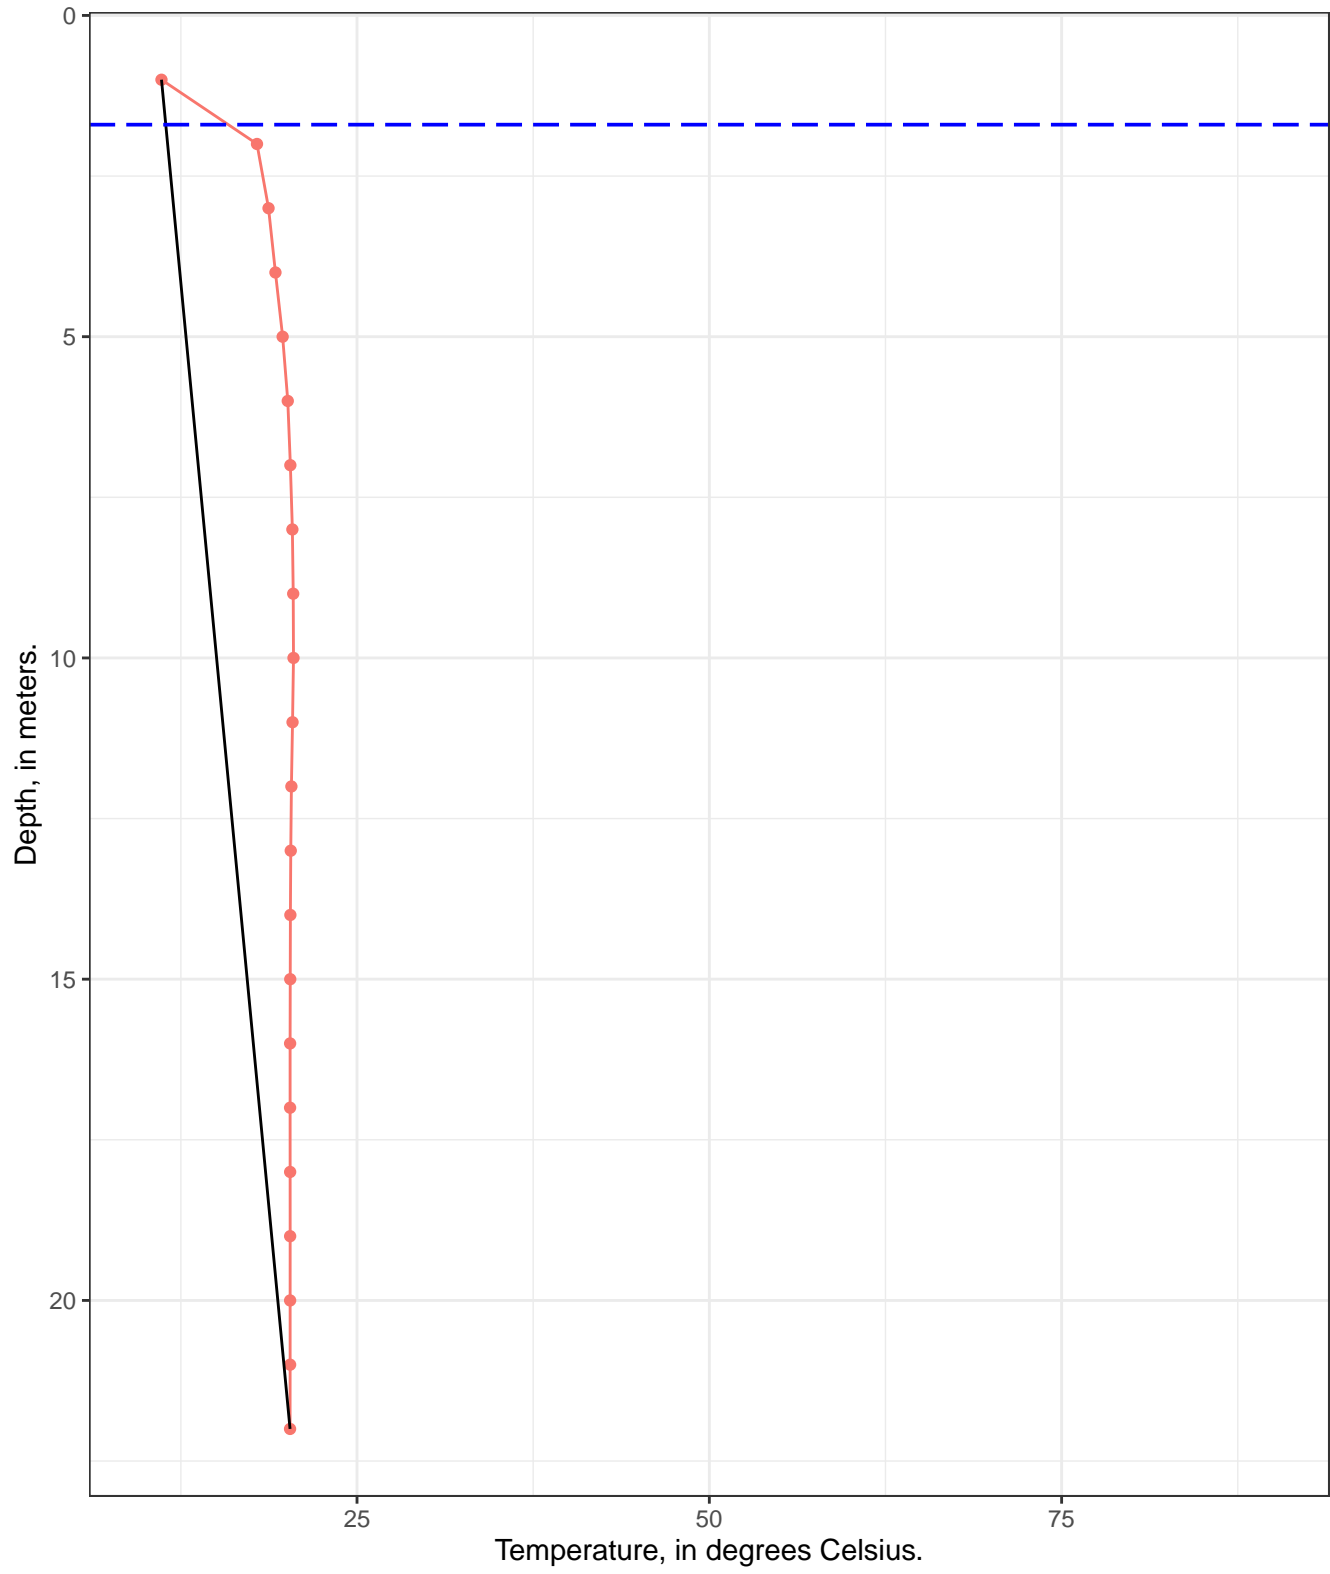

Measurement date 2018-02-23

ID: 189 [ISC-4B]

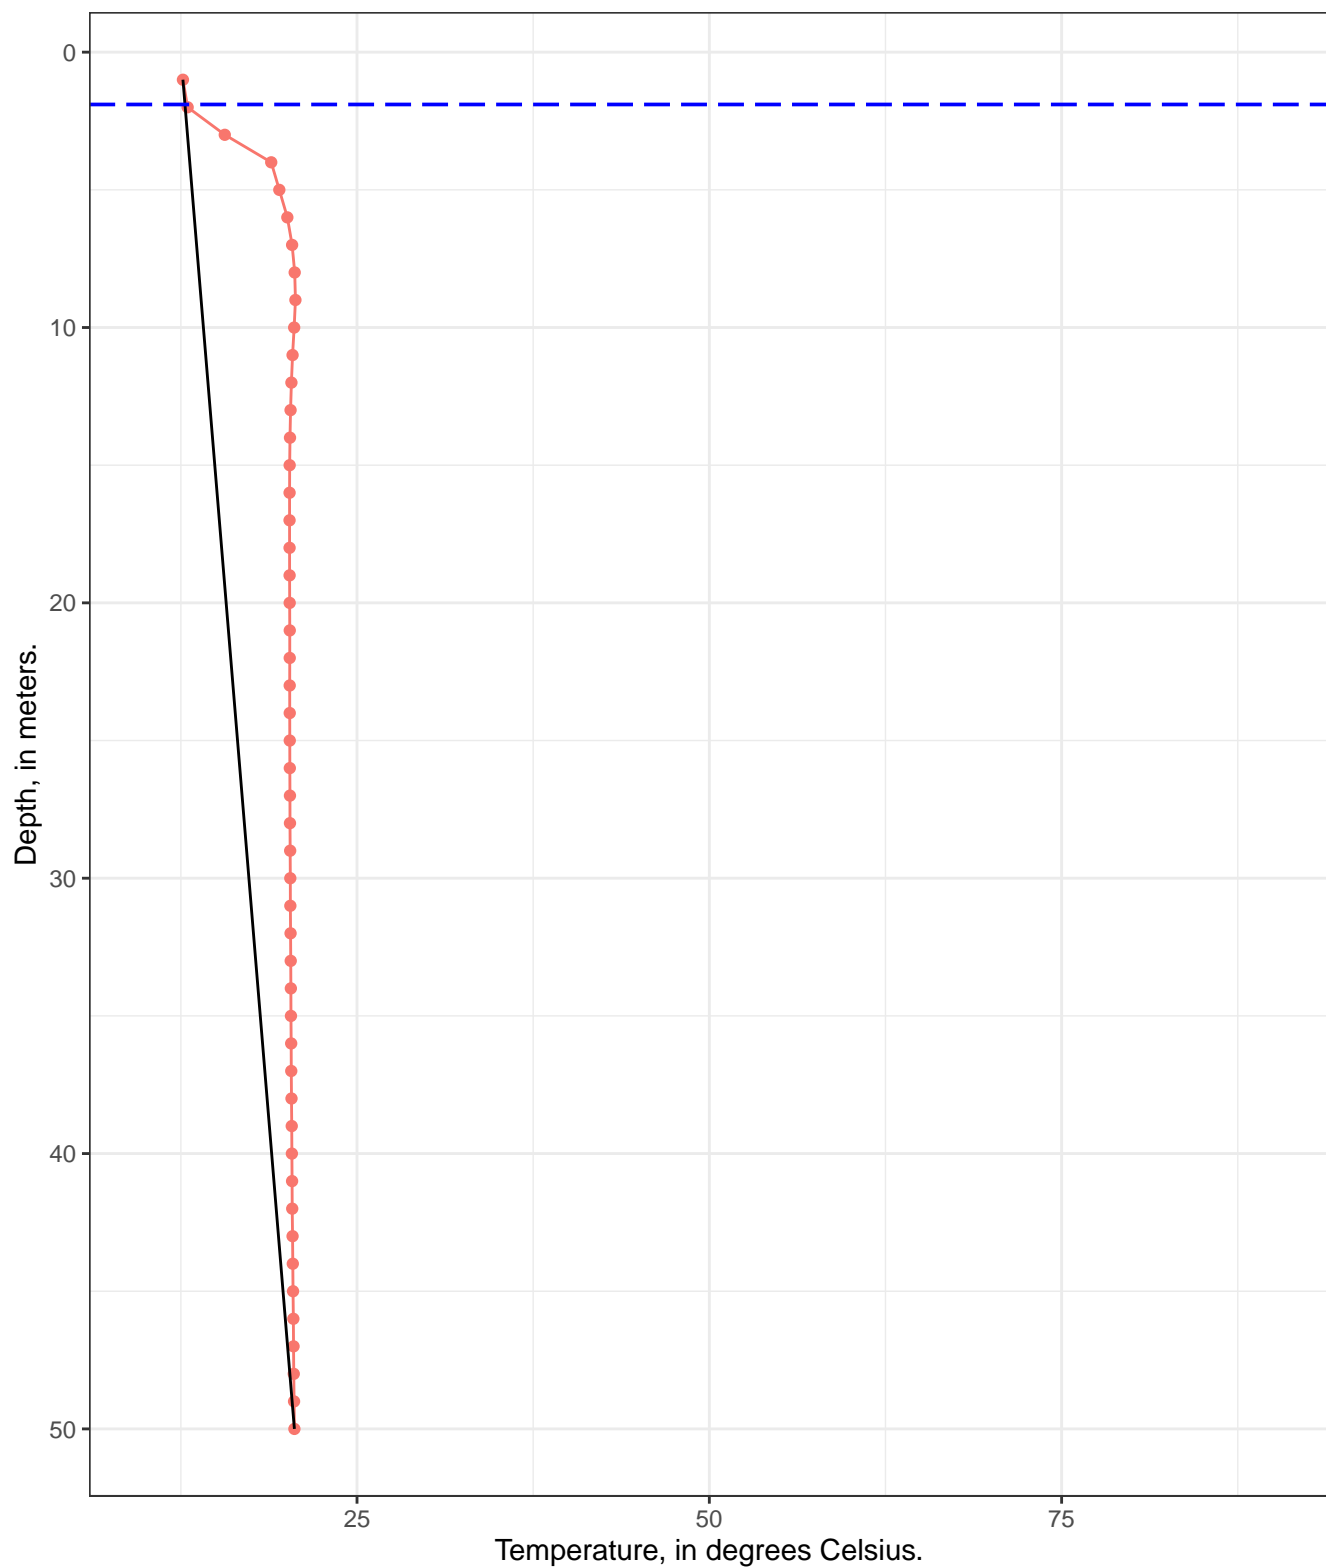

ID: 190 [ISC-7B]

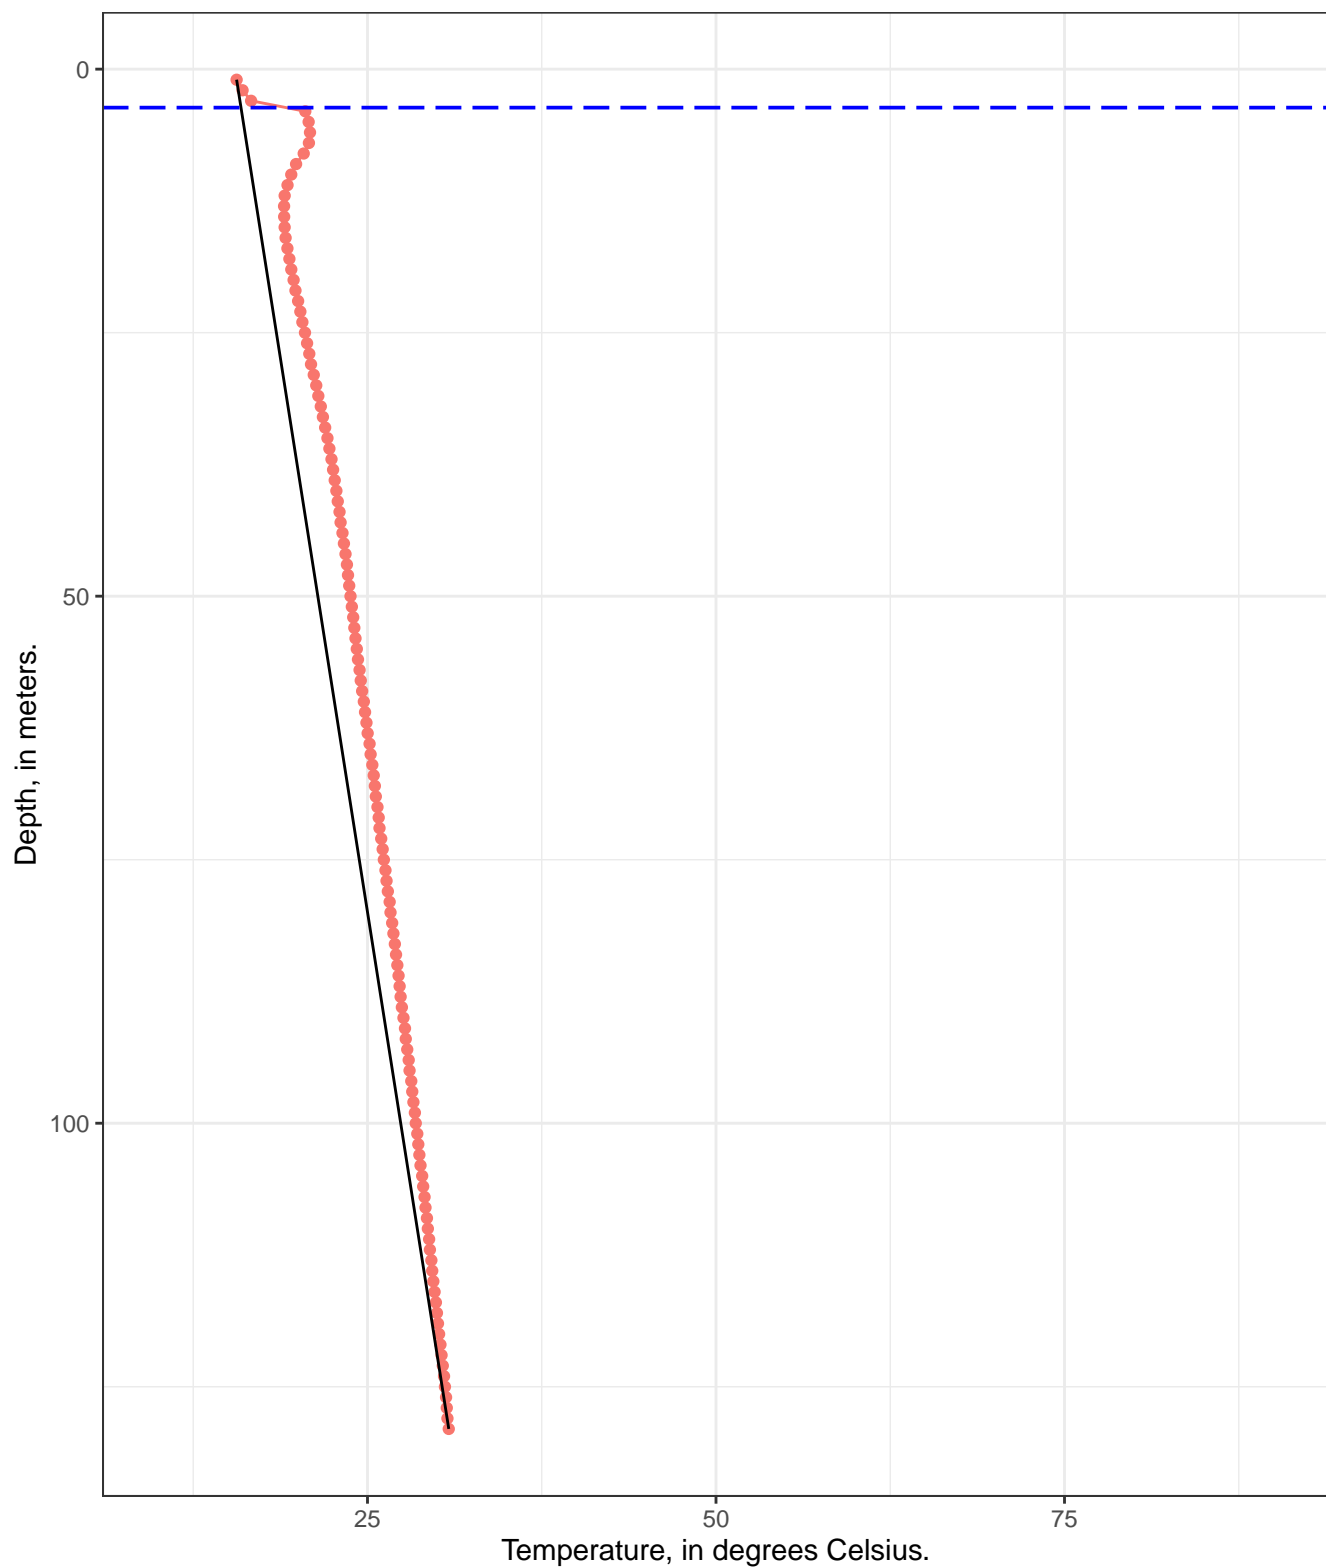

Measurement date 2018-02-23

ID: 191 [LEP\_Well]

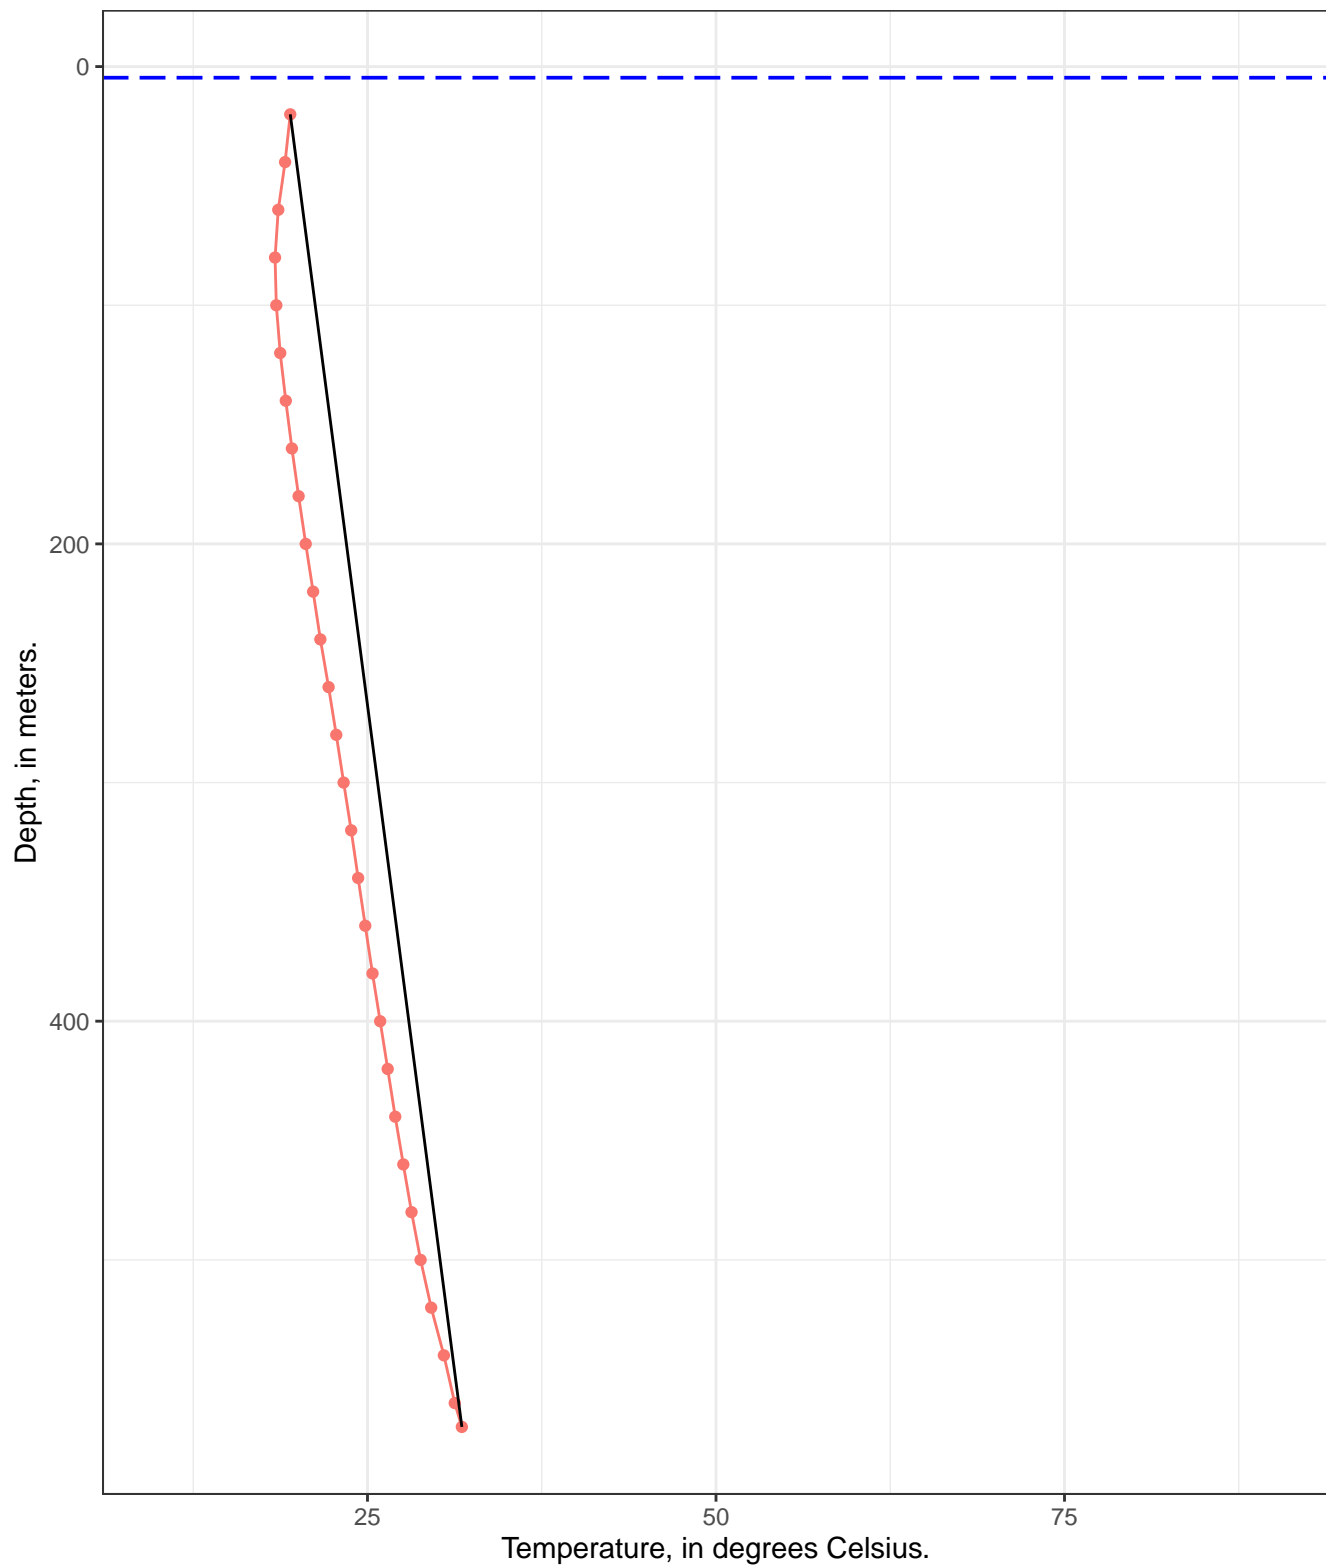

Measurement date 1980-01-01



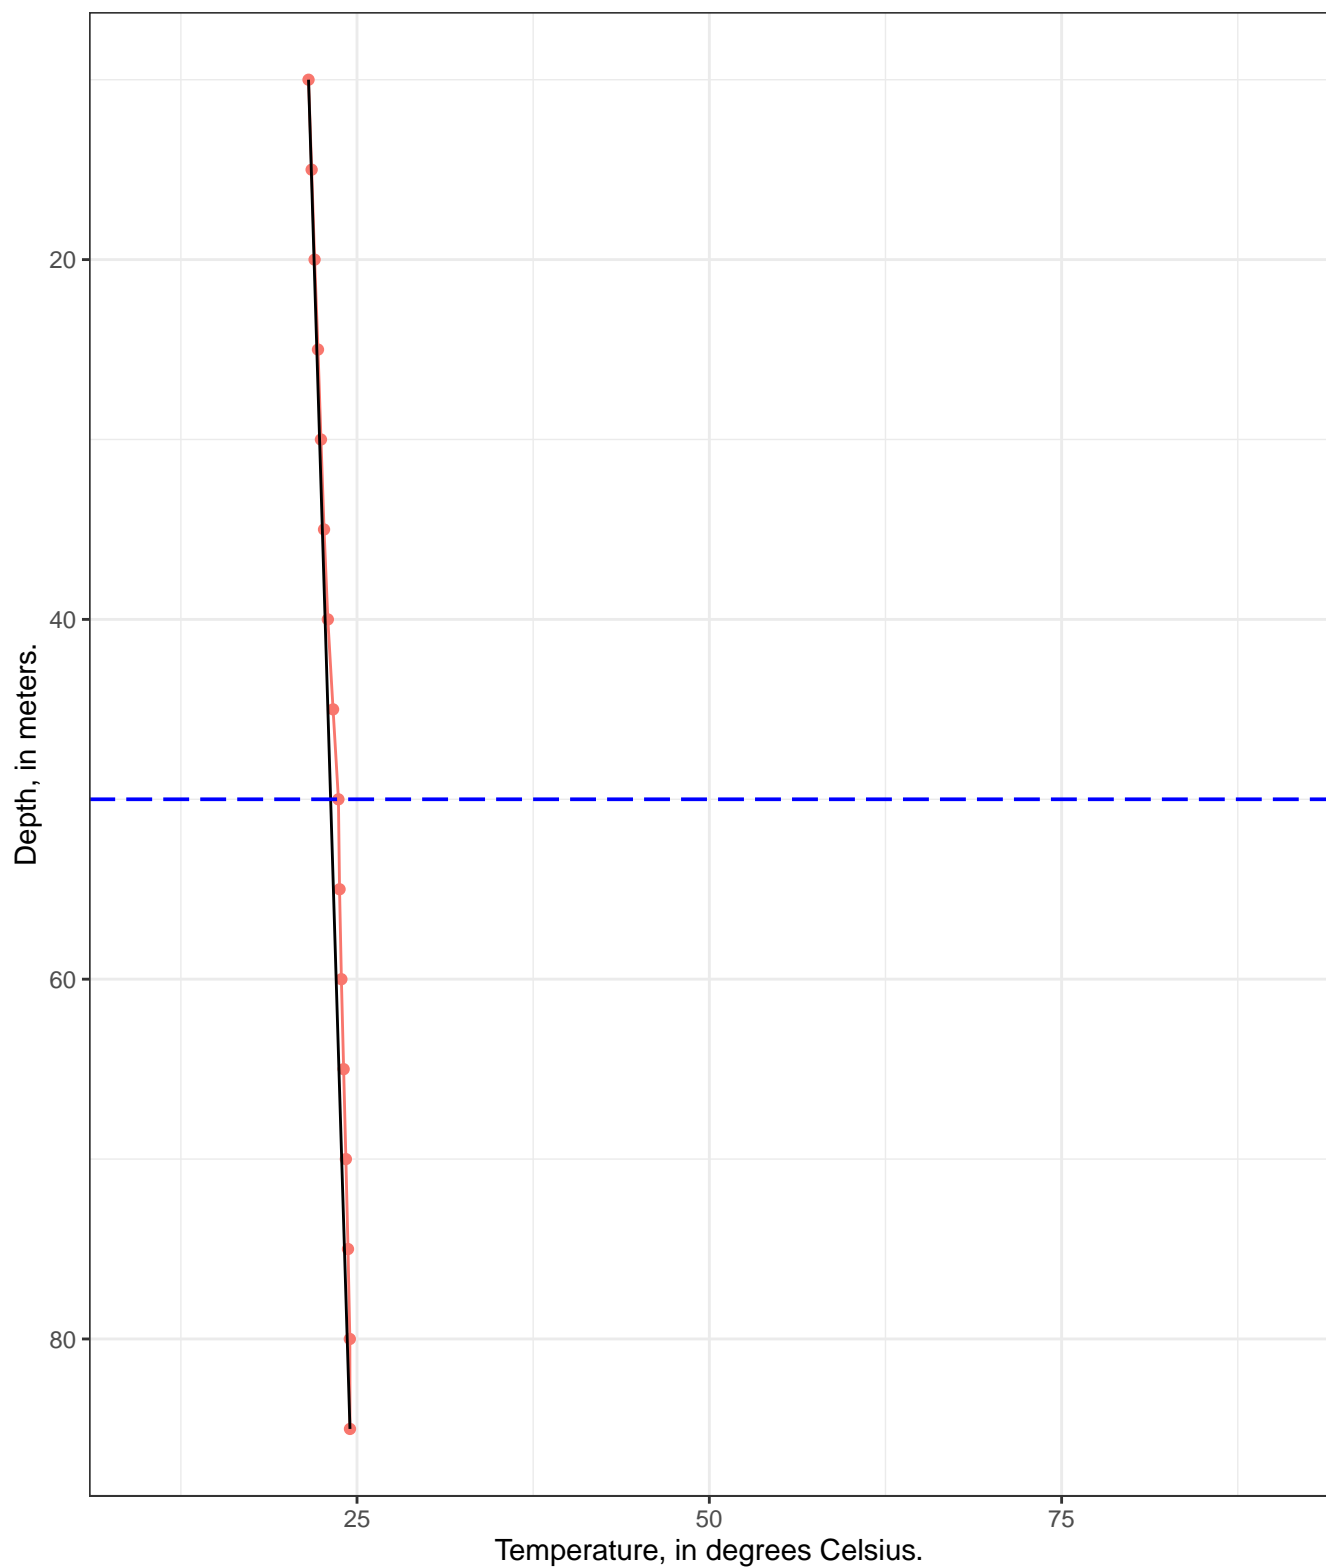

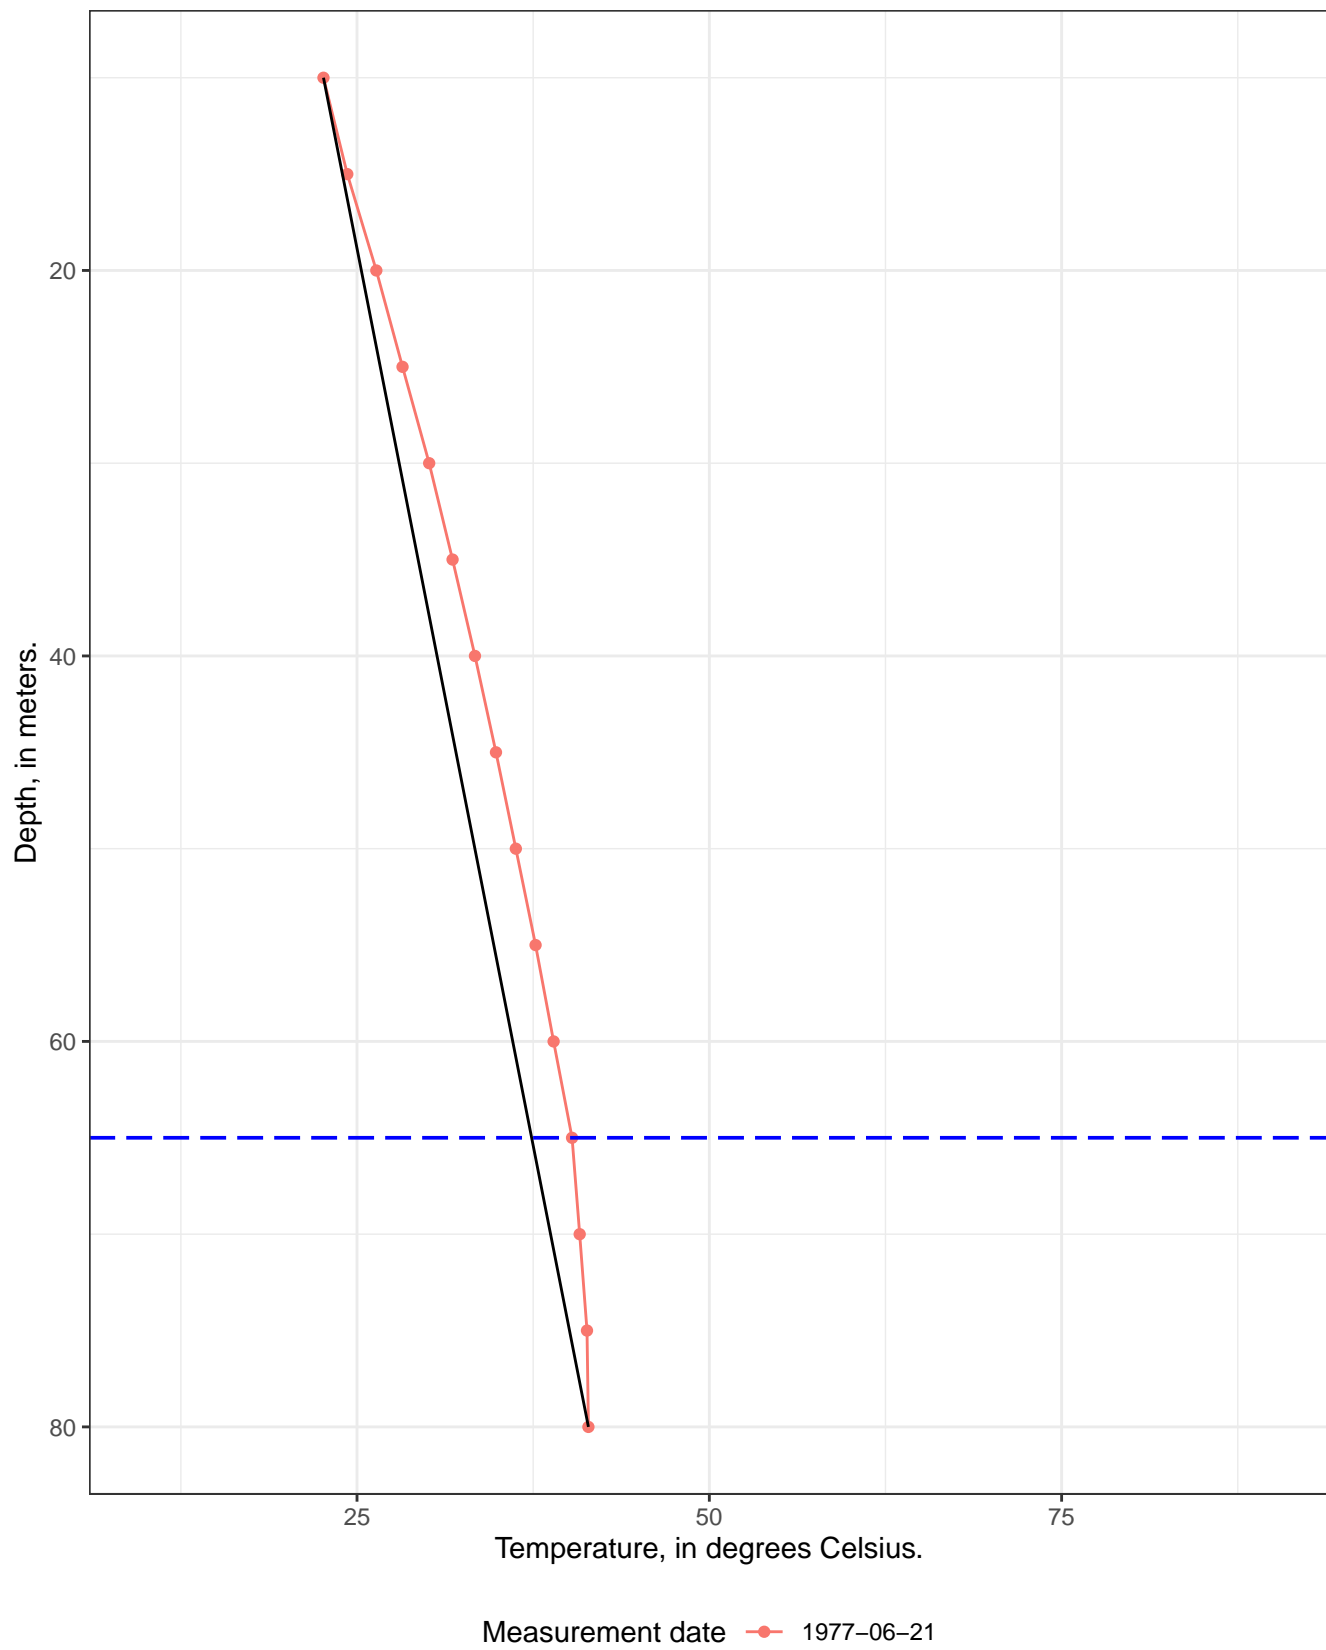

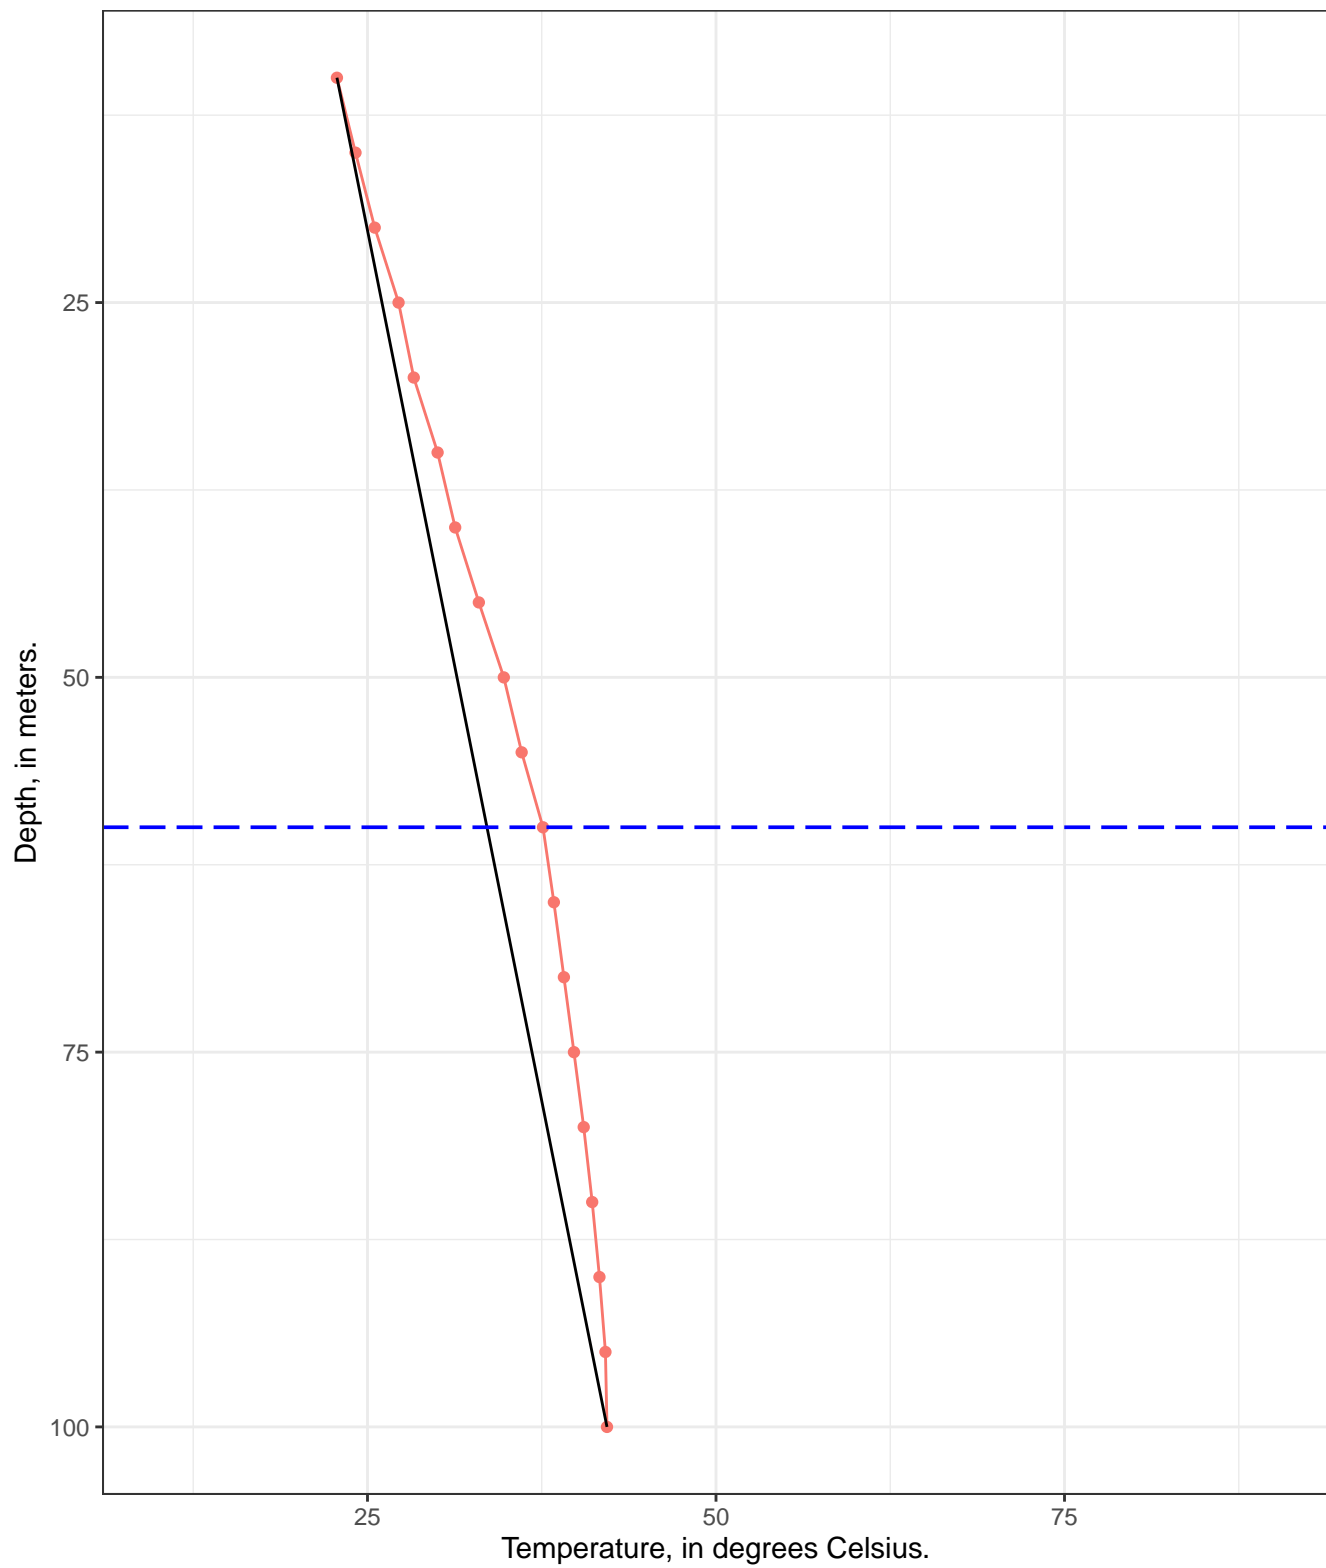

ID: 195 [Las\_Cruces\_N\_E]

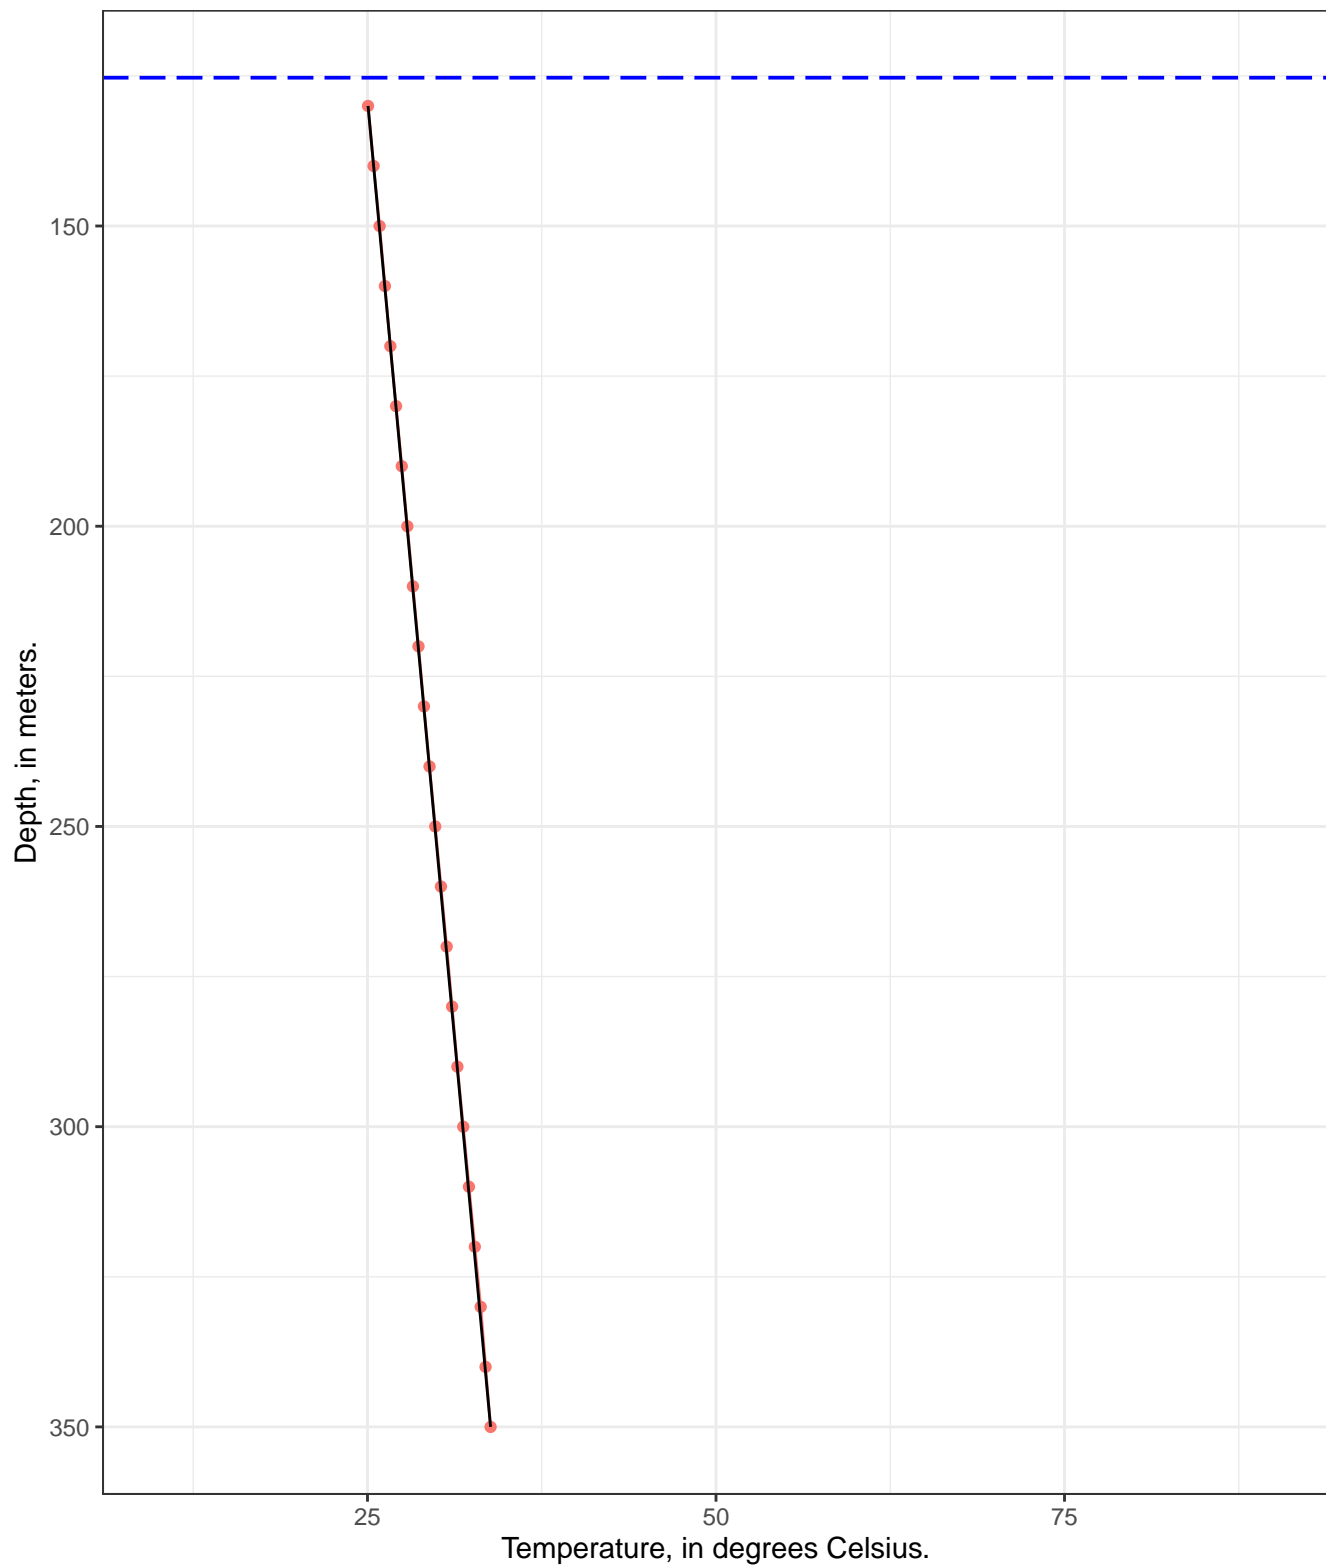

Measurement date 1975-01-23

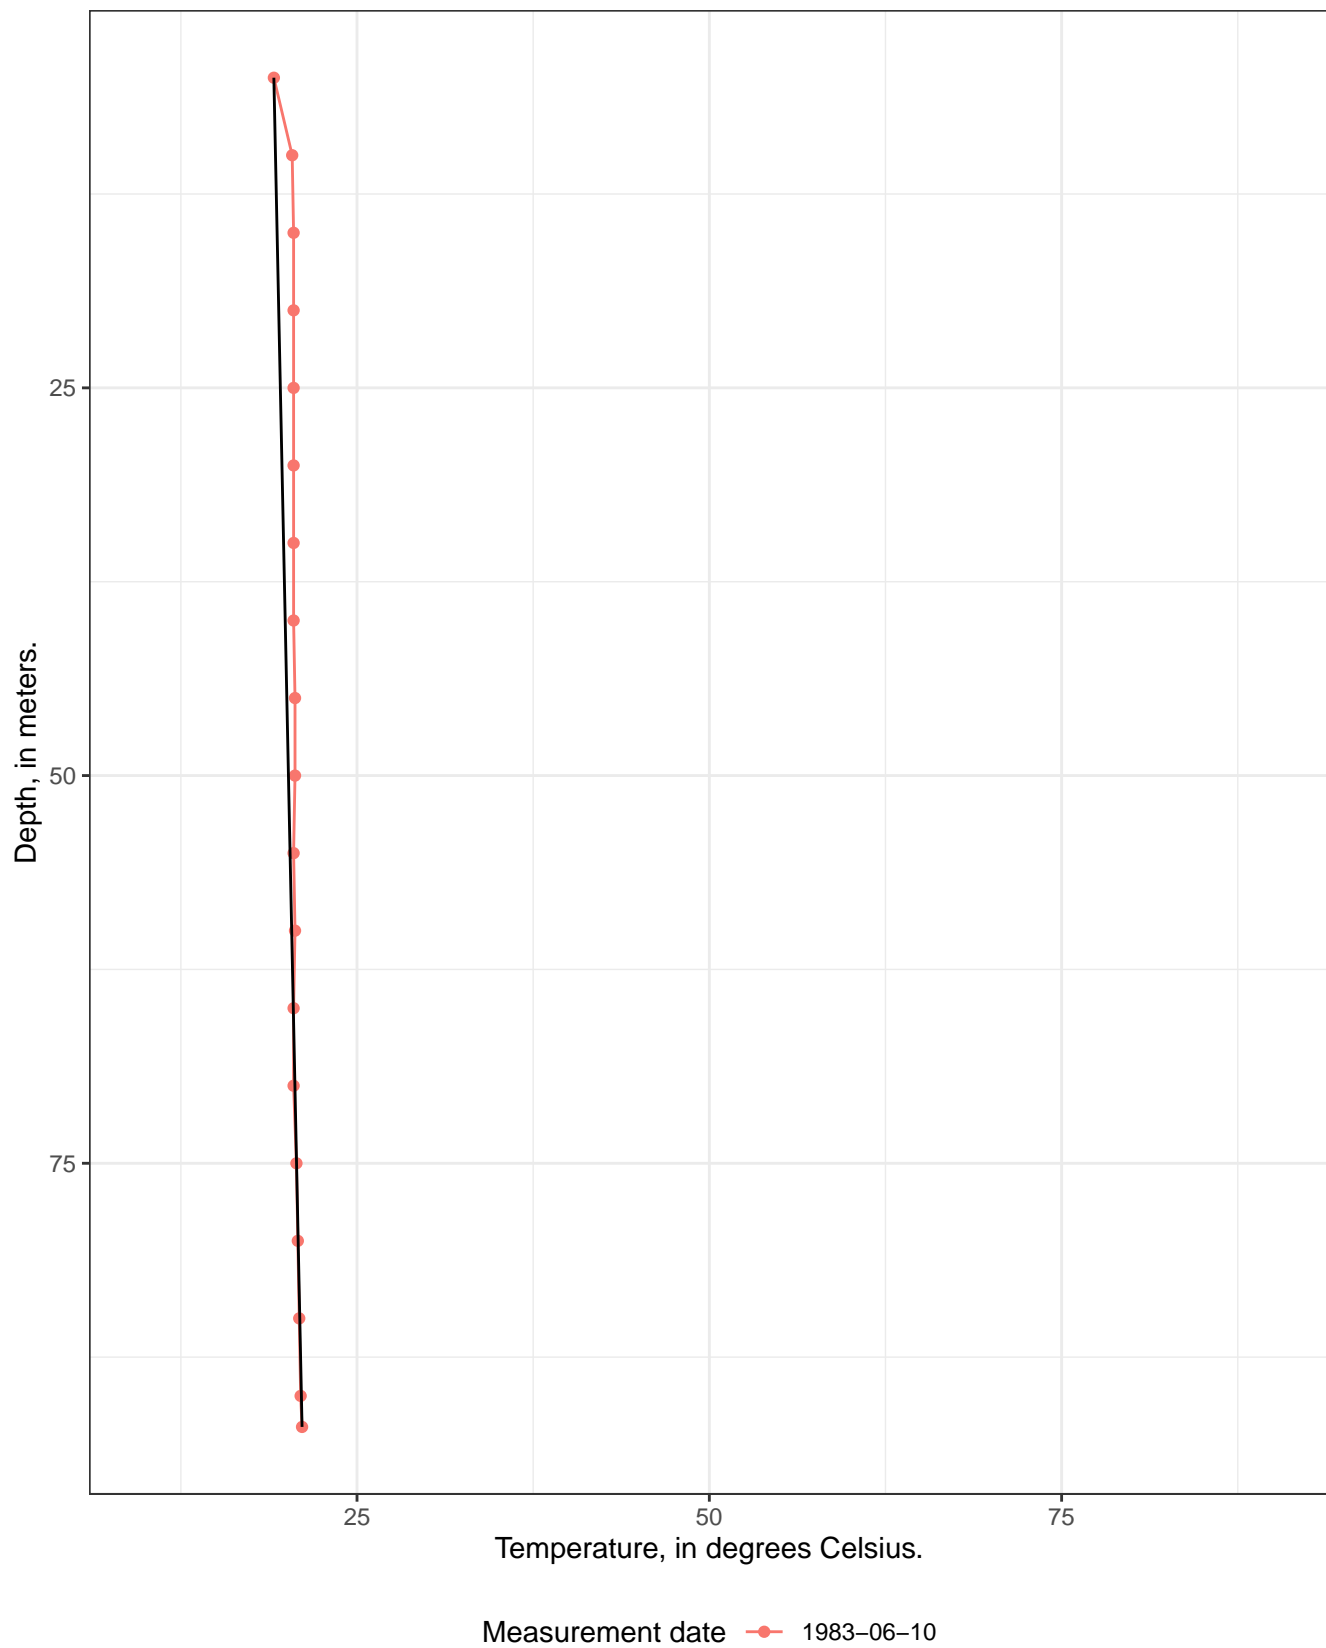

ID: 197 [Las\_Cruces\_S\_W]

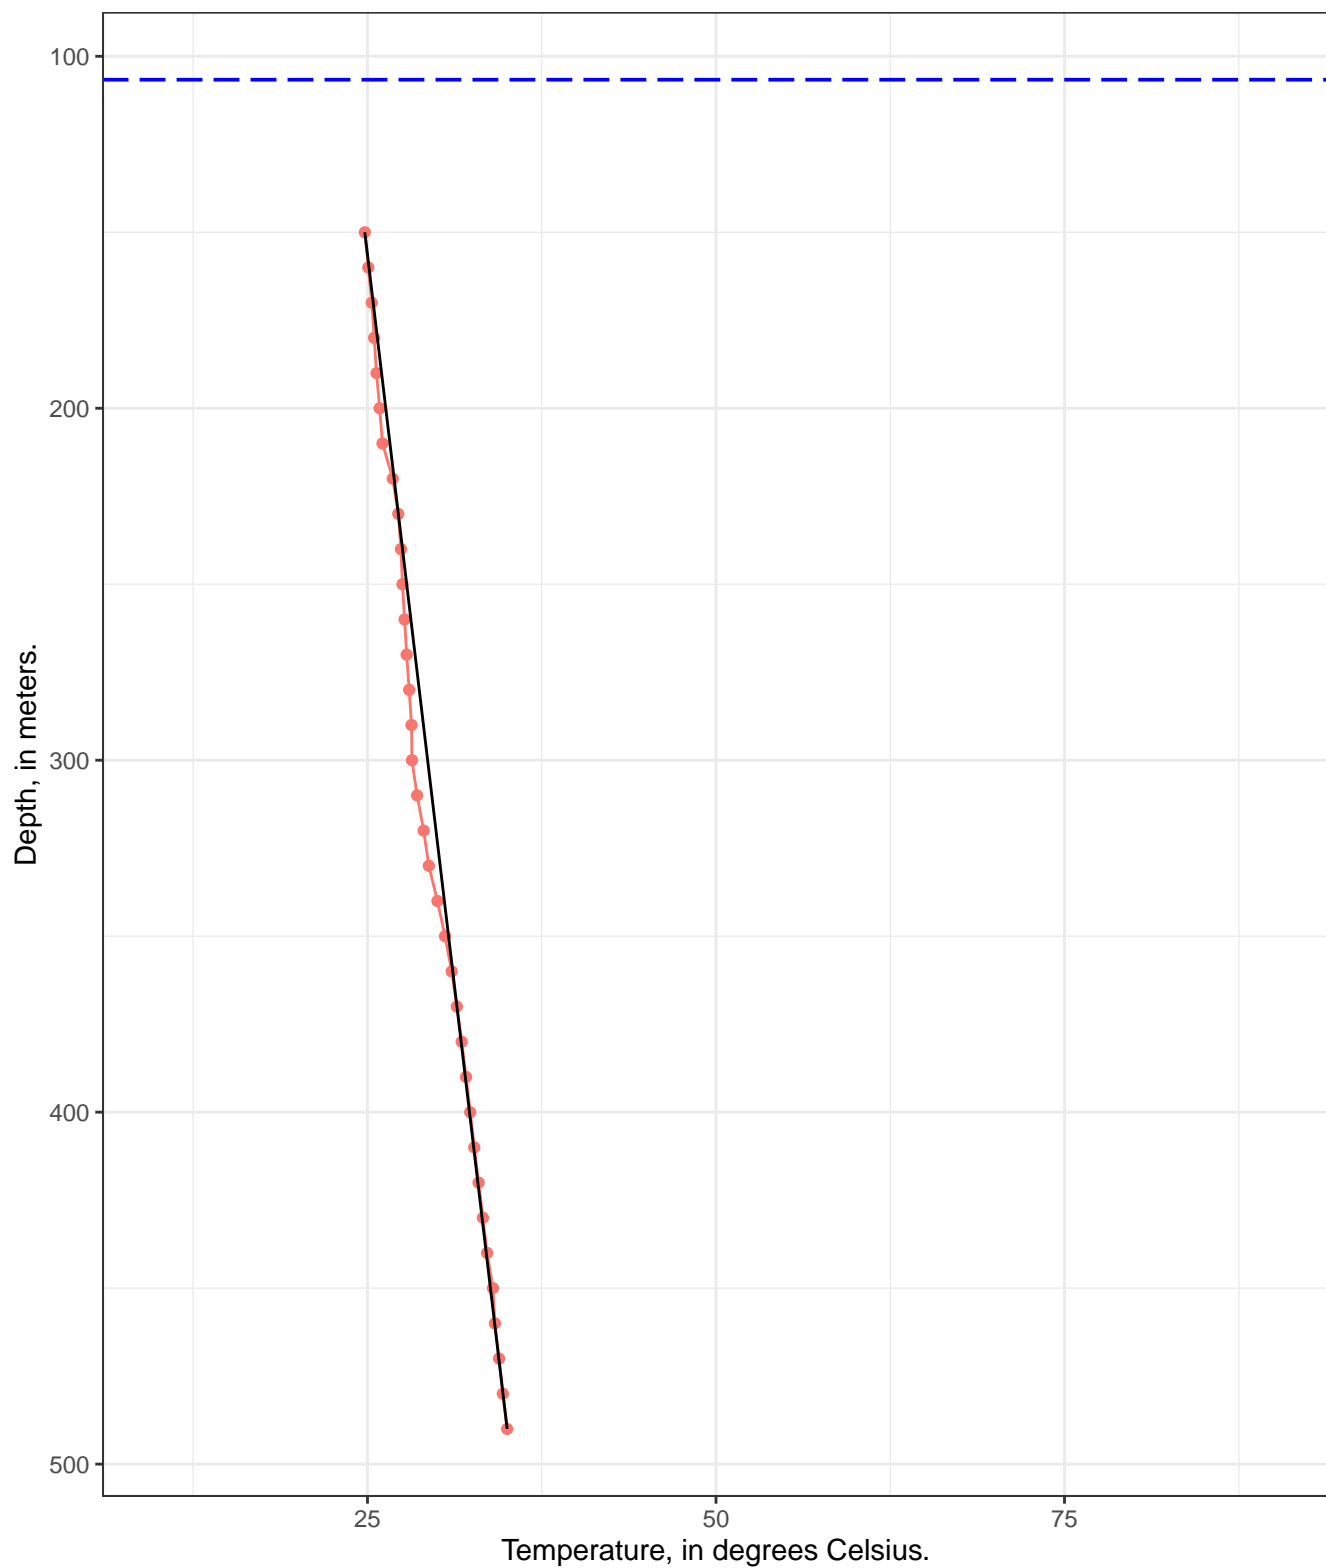

ID: 198 [LC-1]

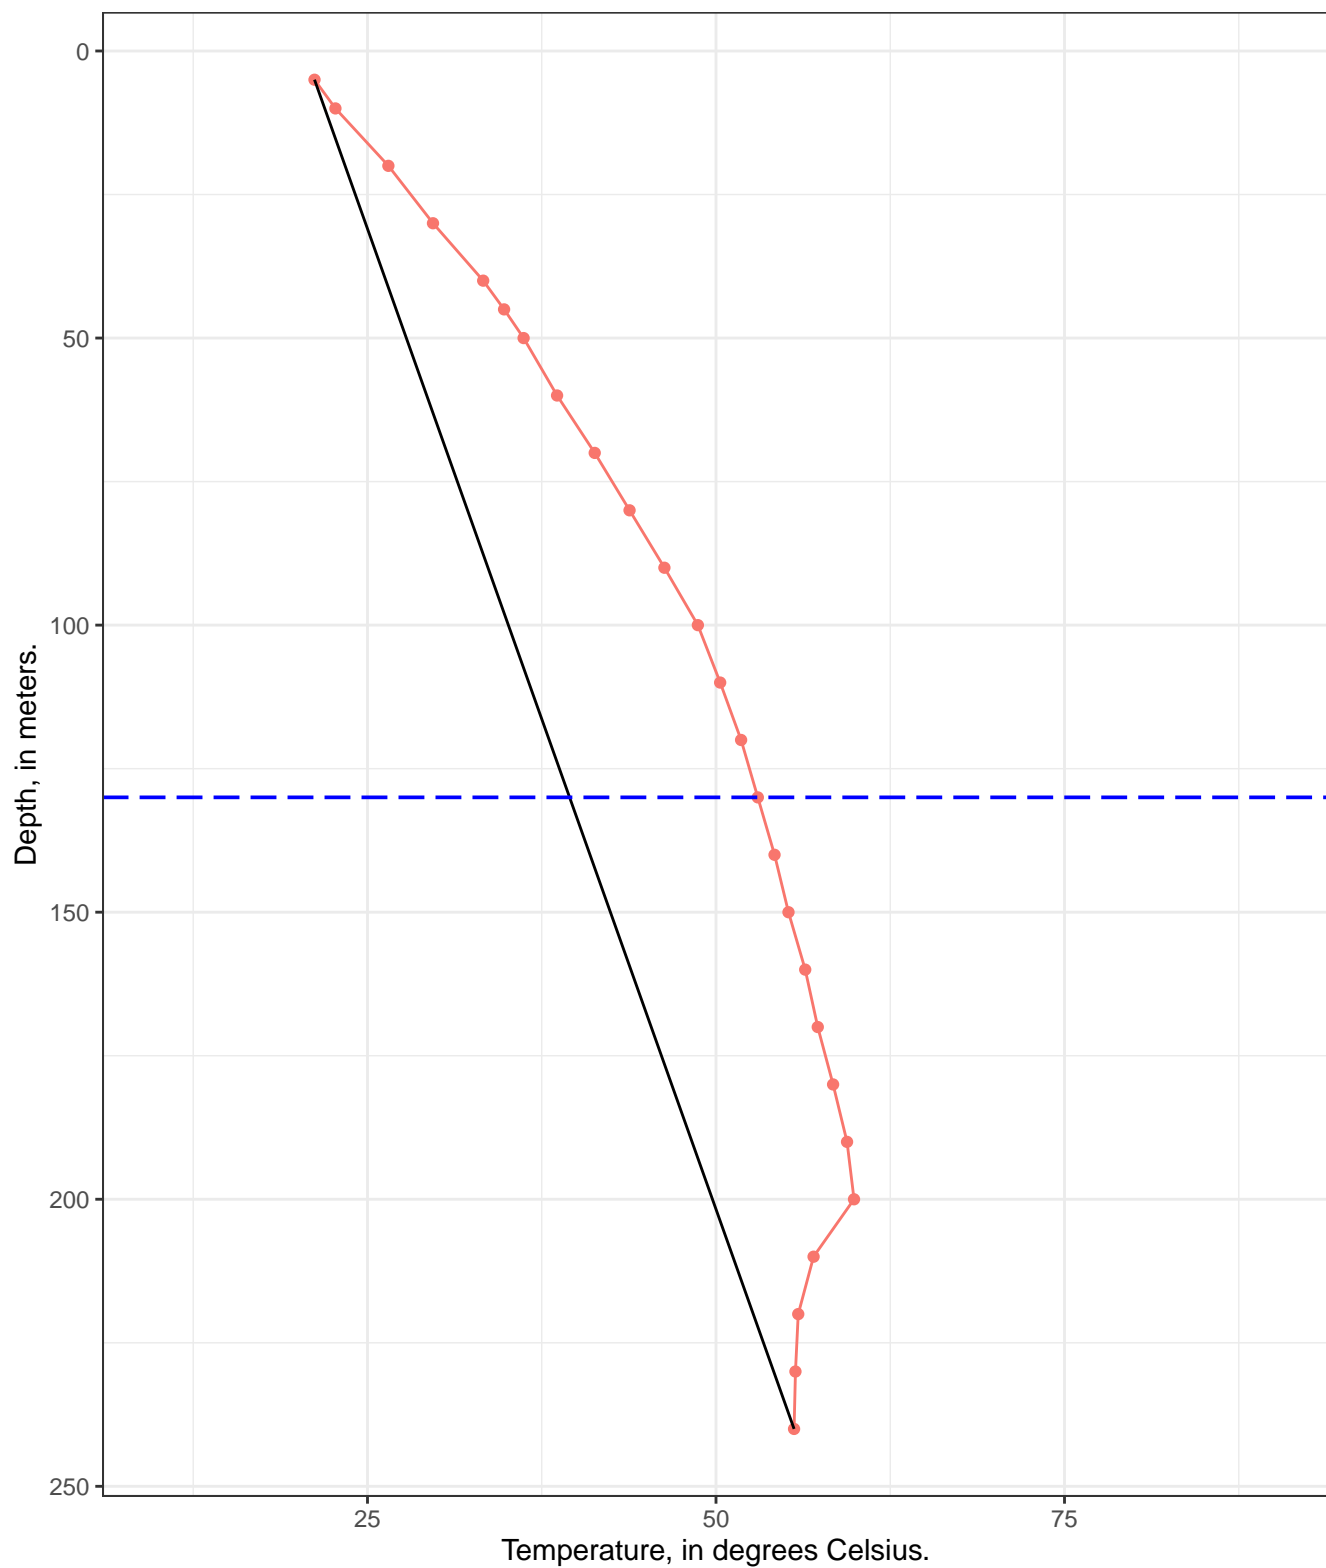

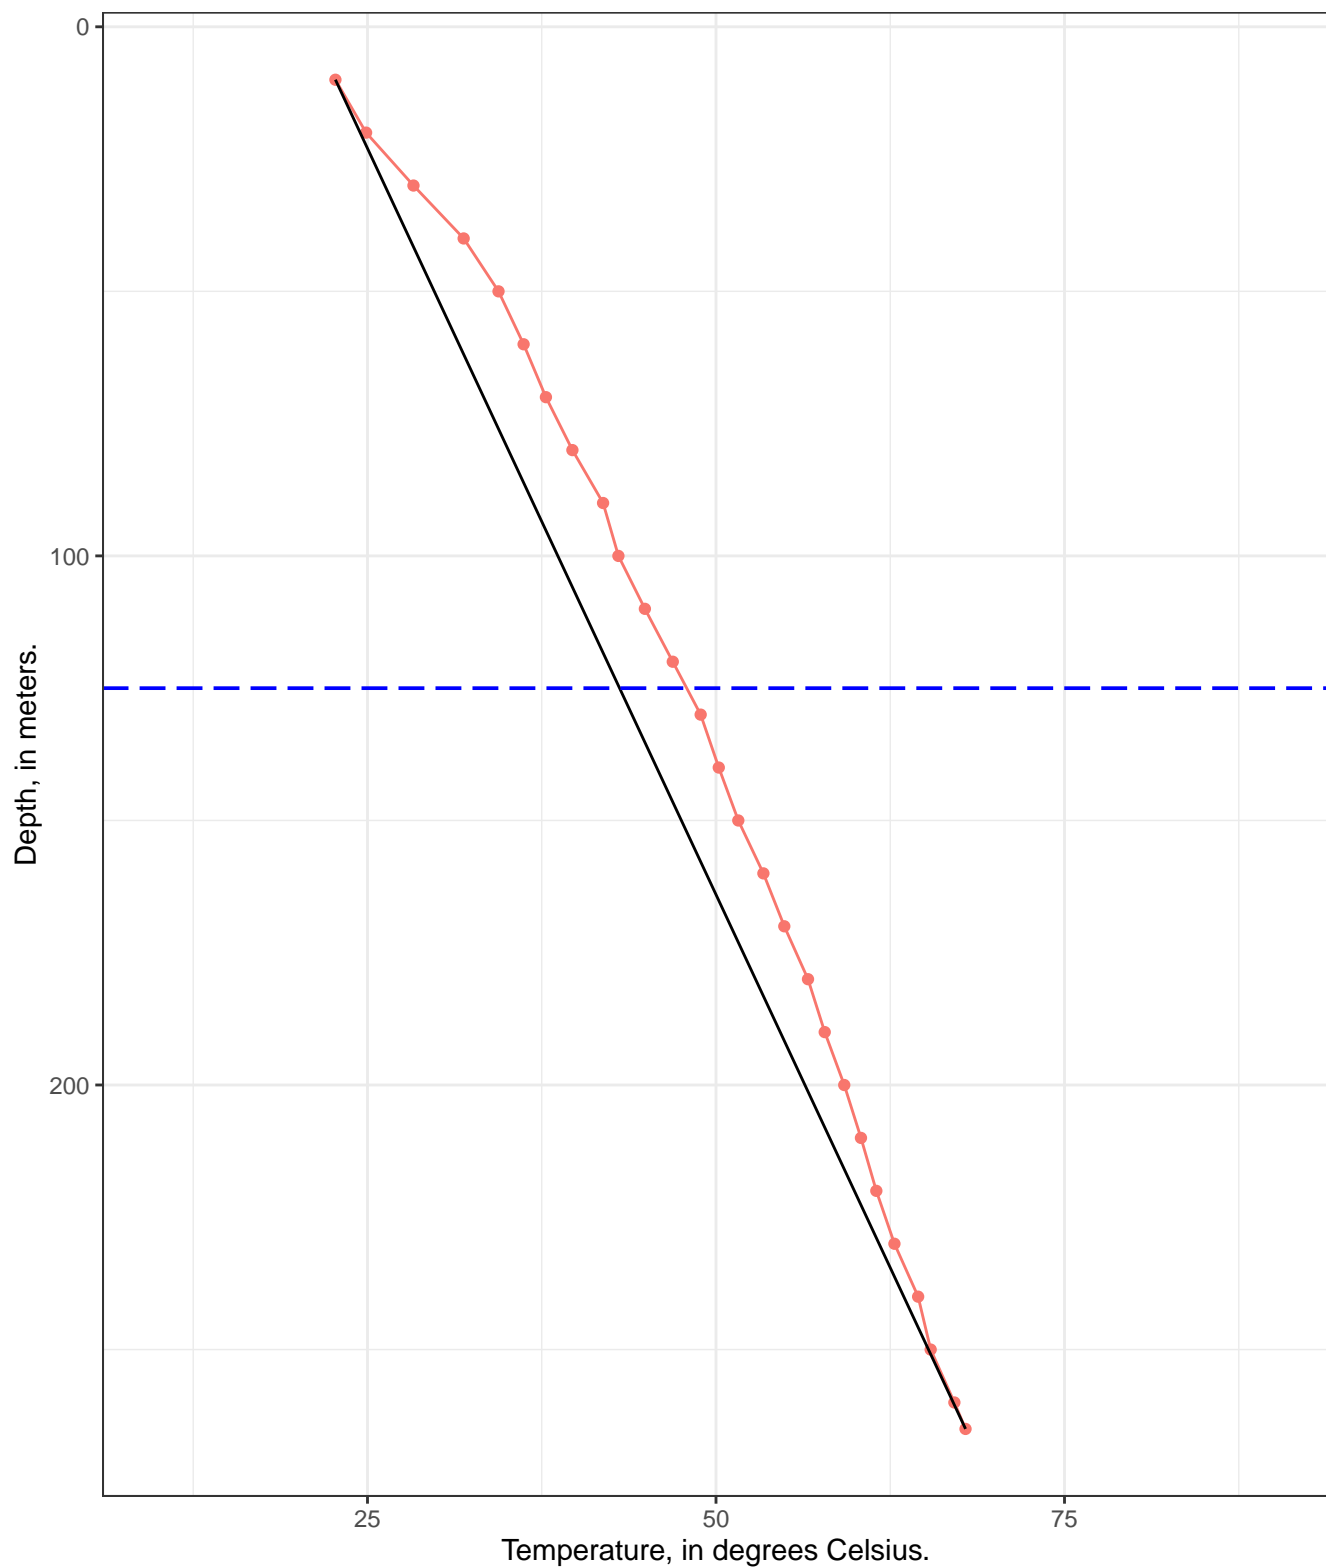

Measurement date —●— 1980-01-01



ID: 200 [LC-2F]

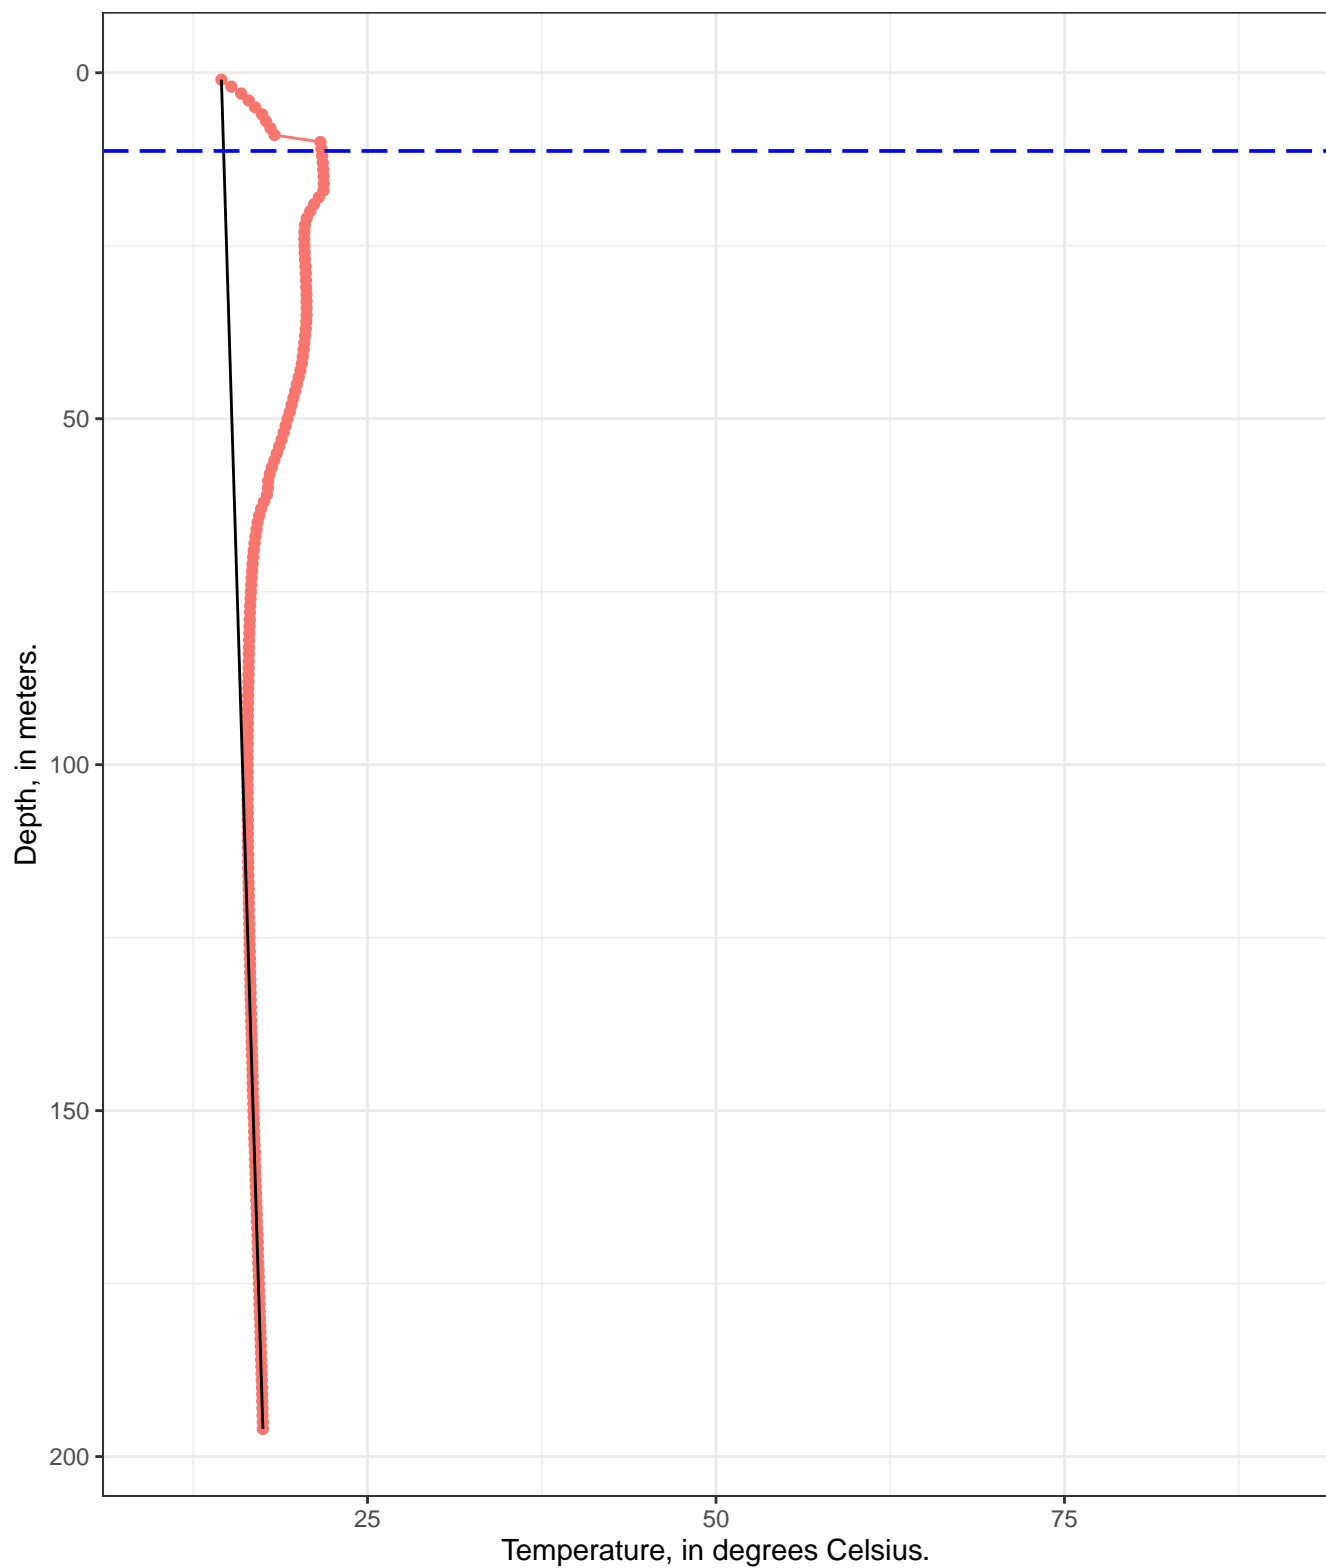

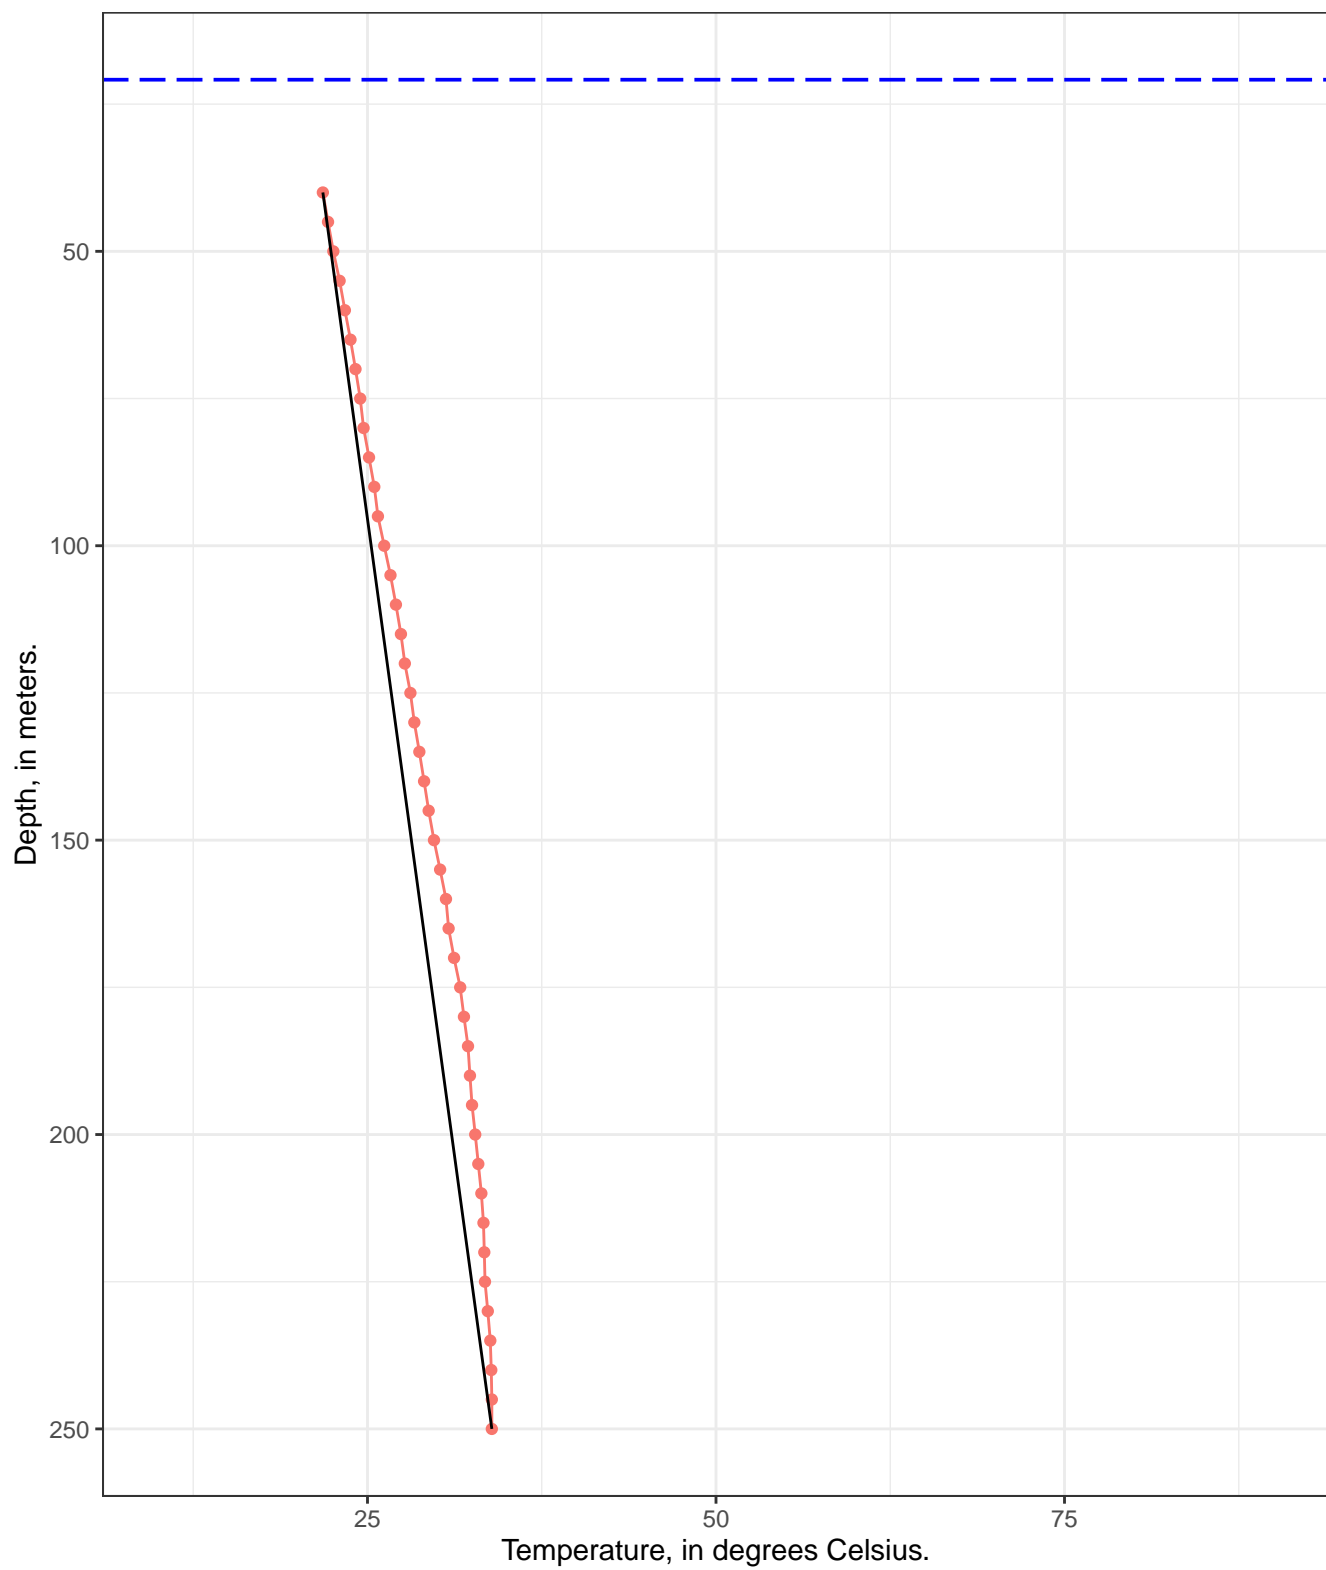

Measurement date —●— 1987-12-04

ID: 202 [LMV-2B]

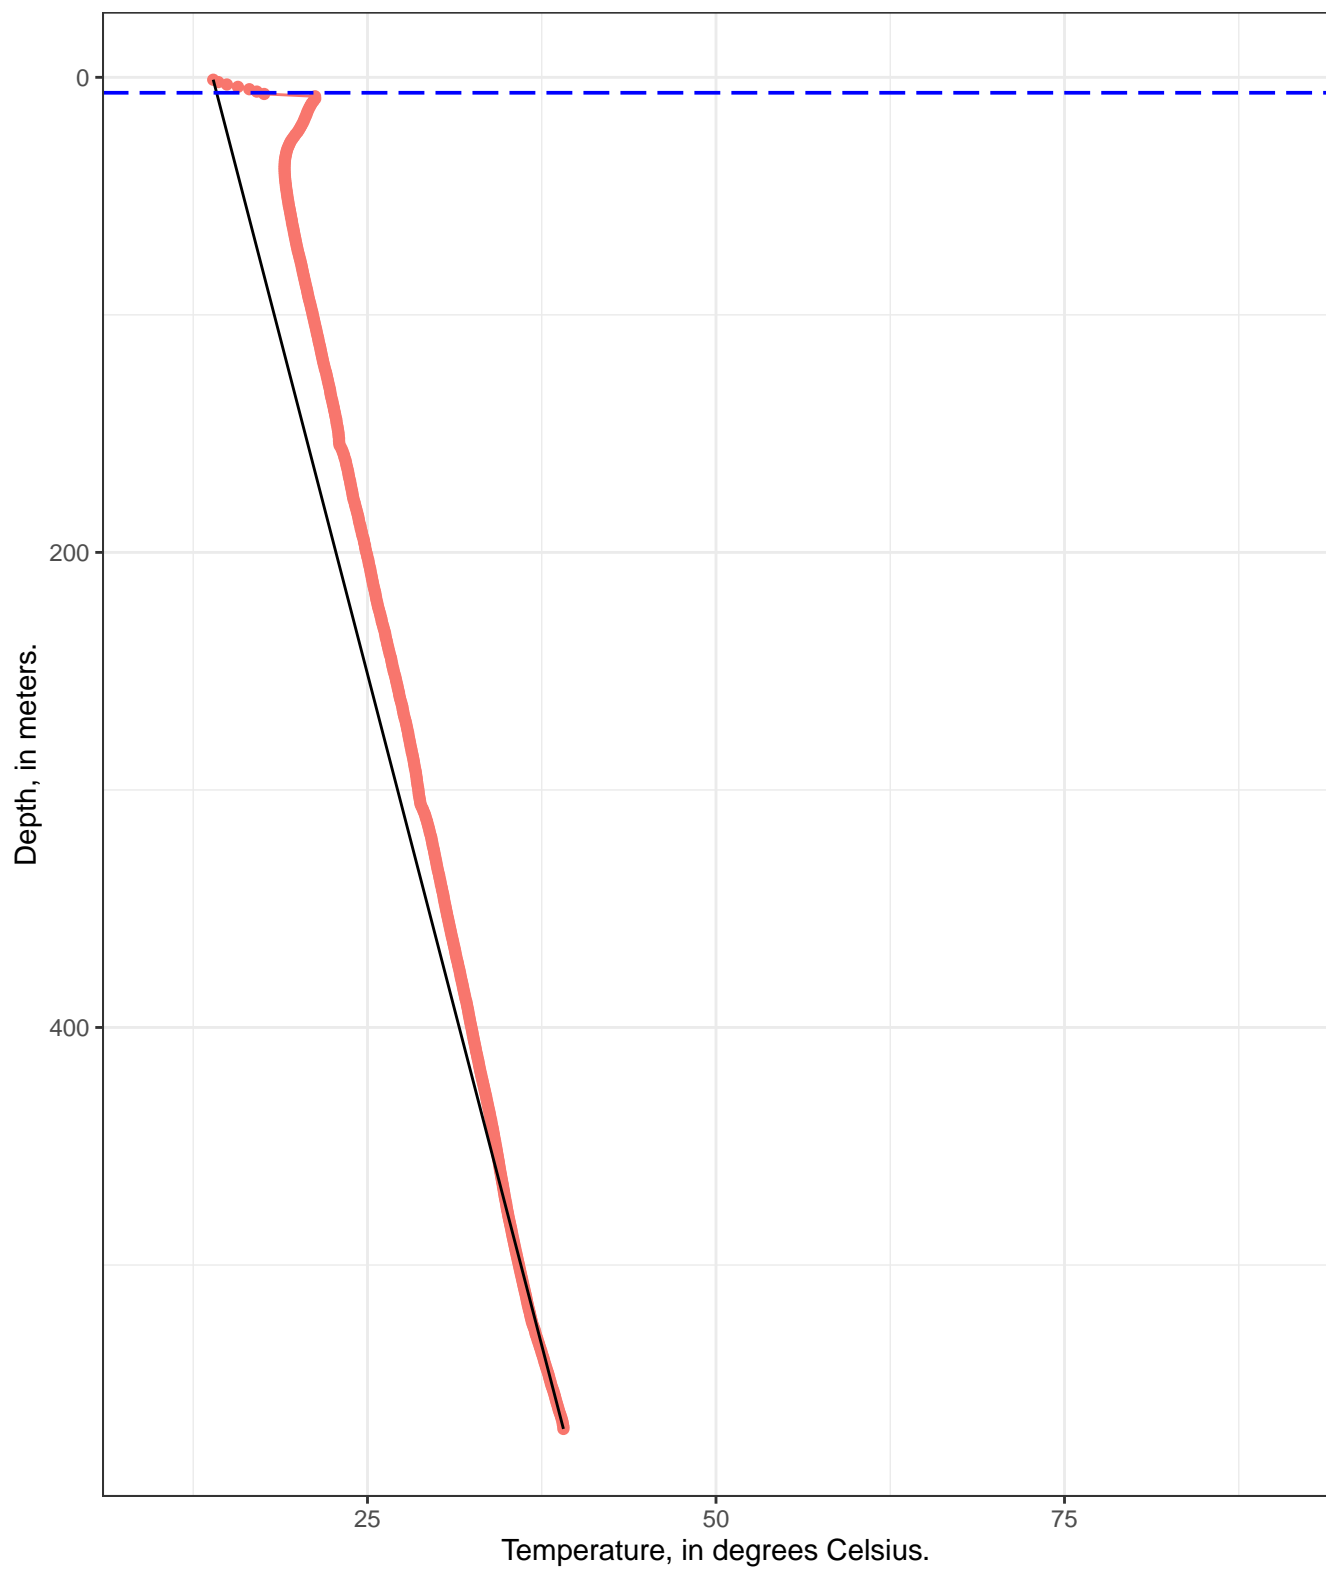

ID: 203 [M-2A]

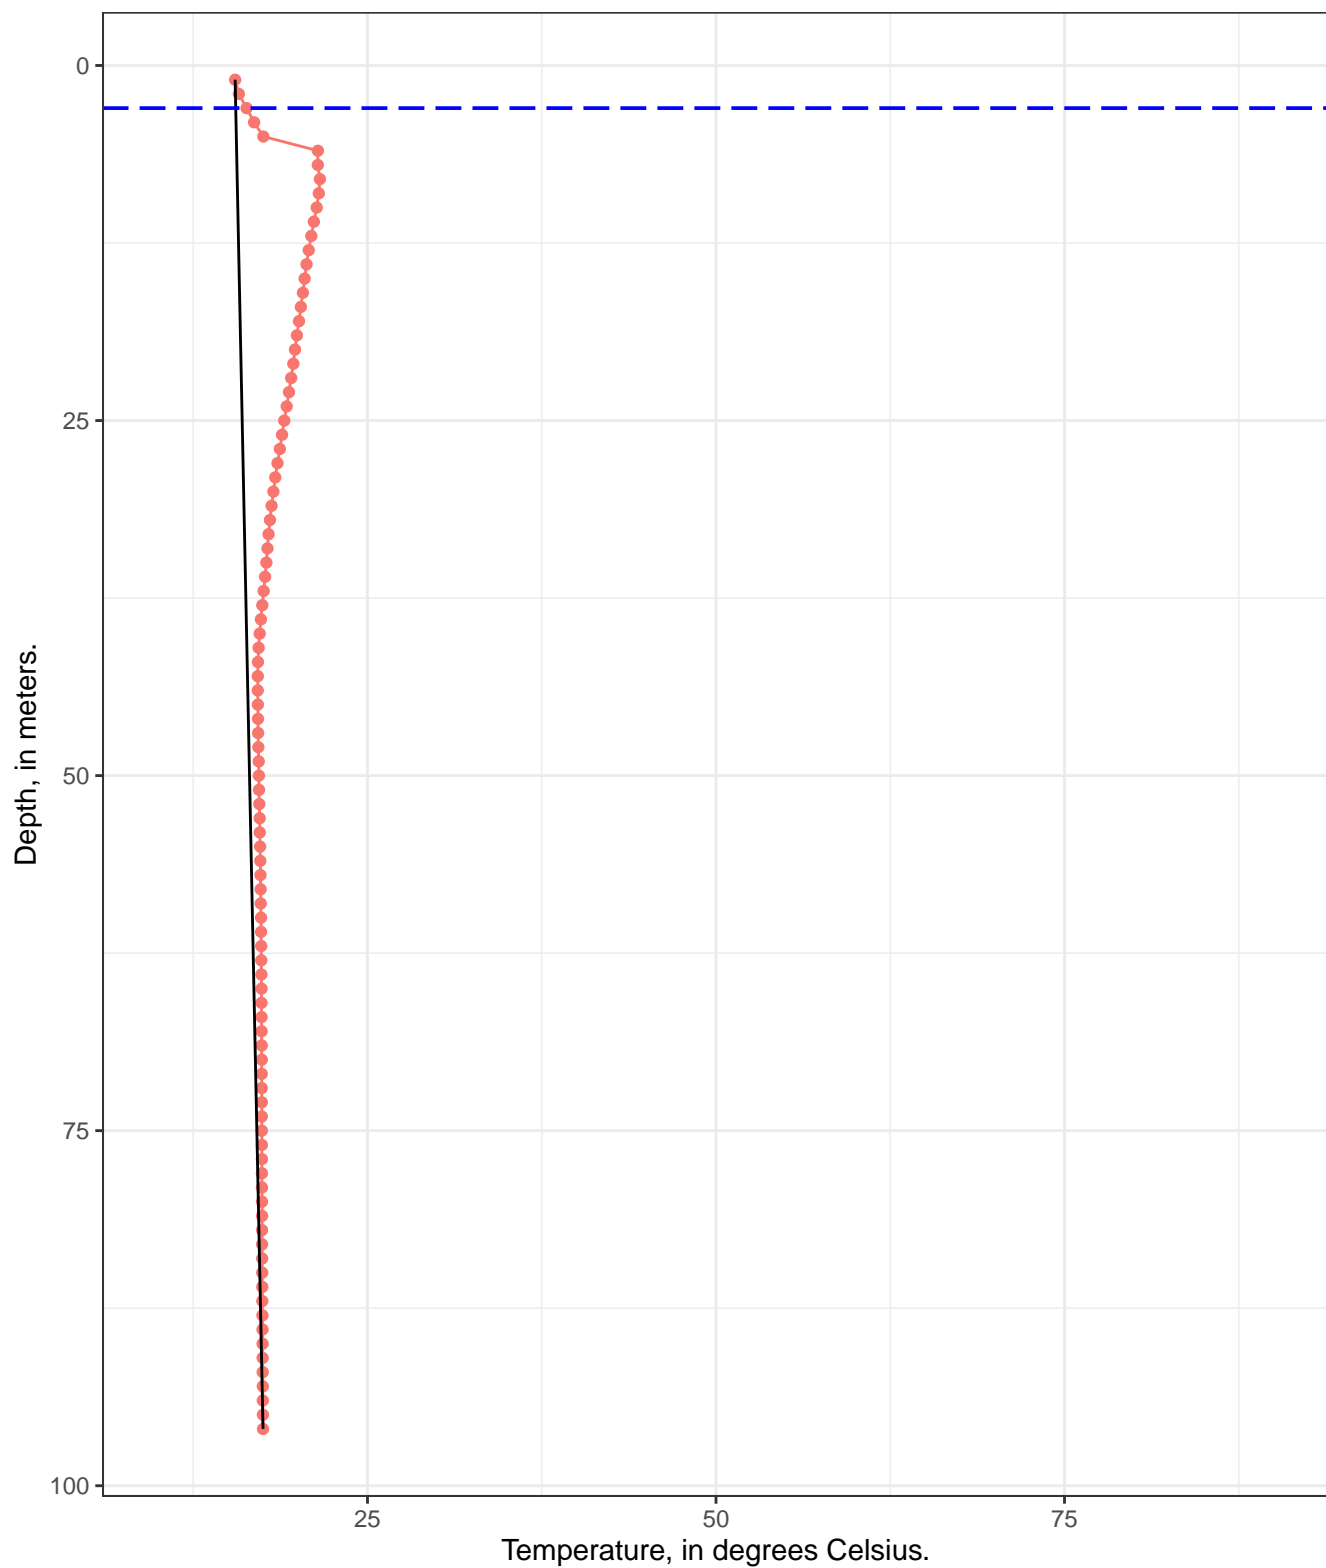

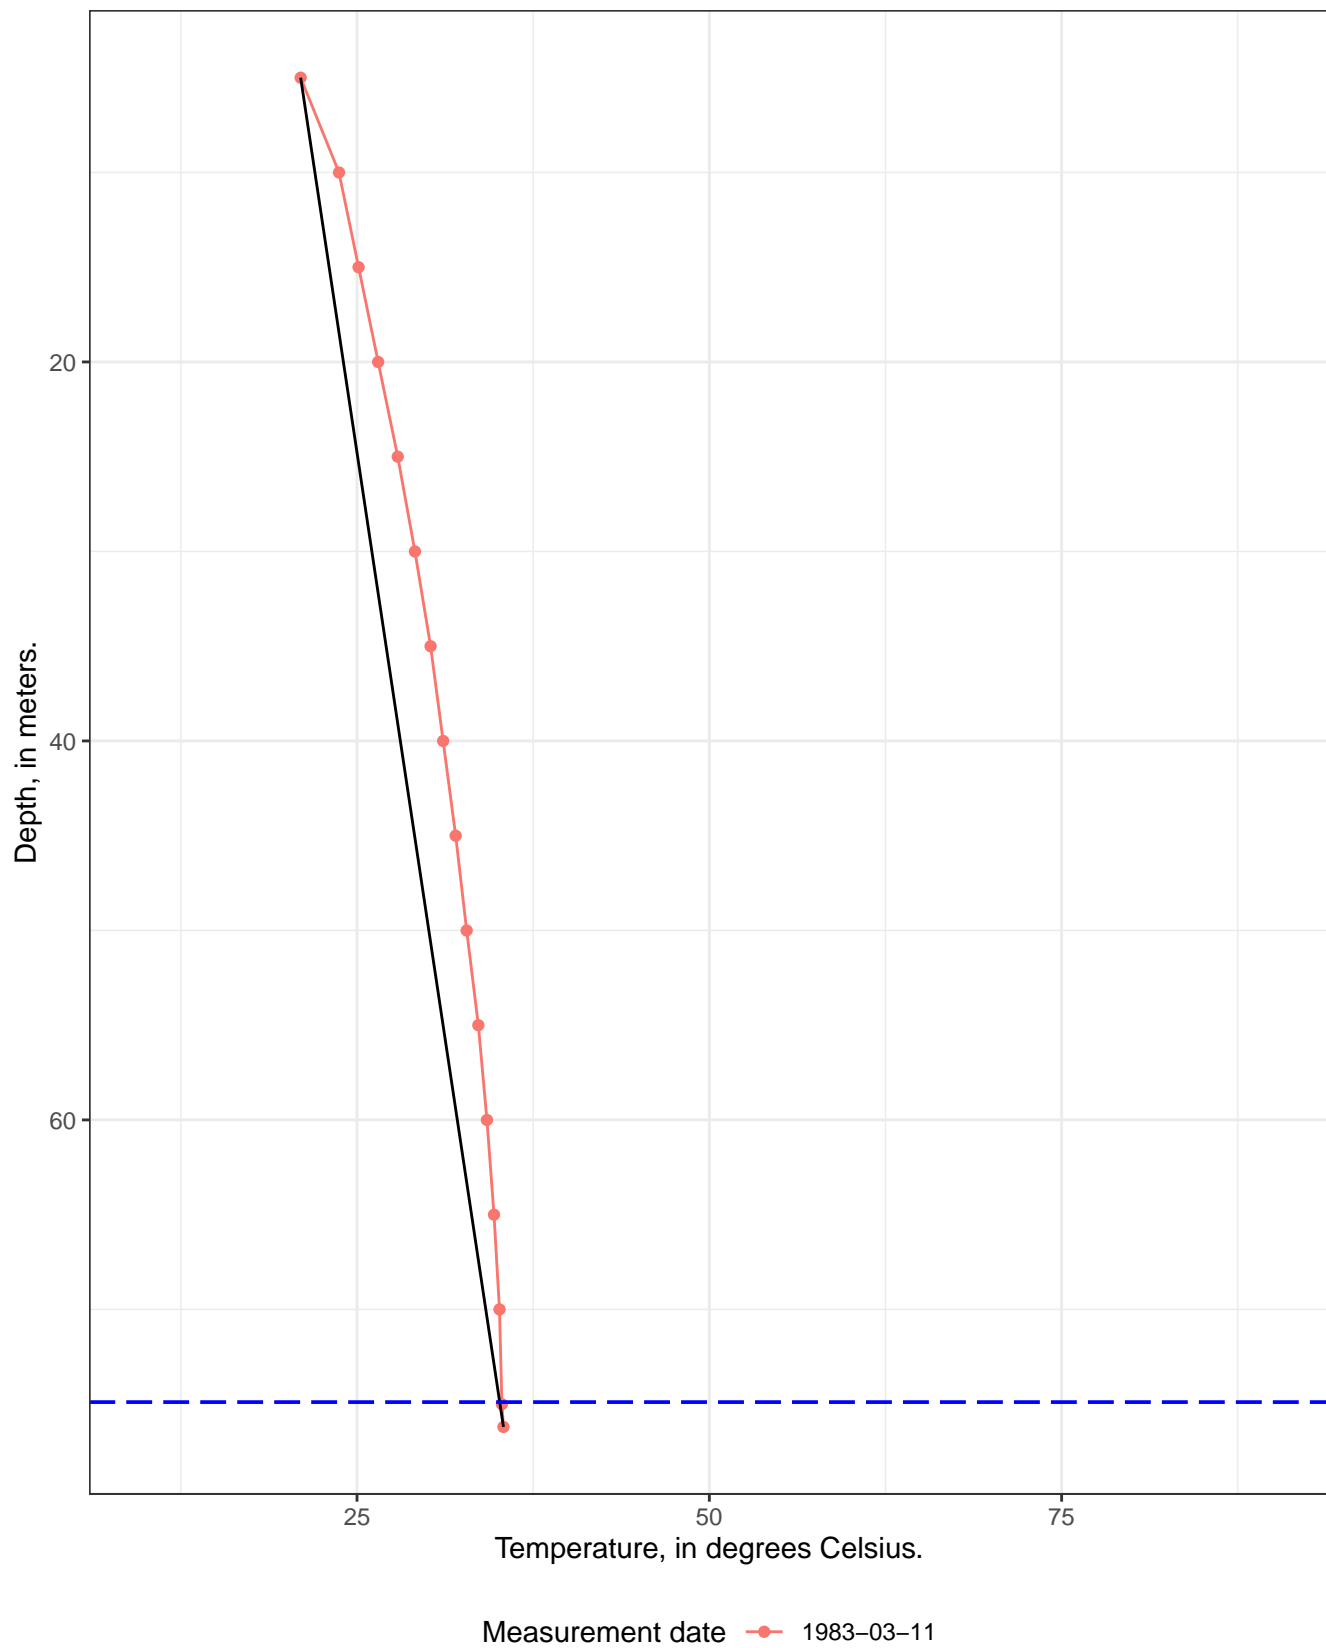

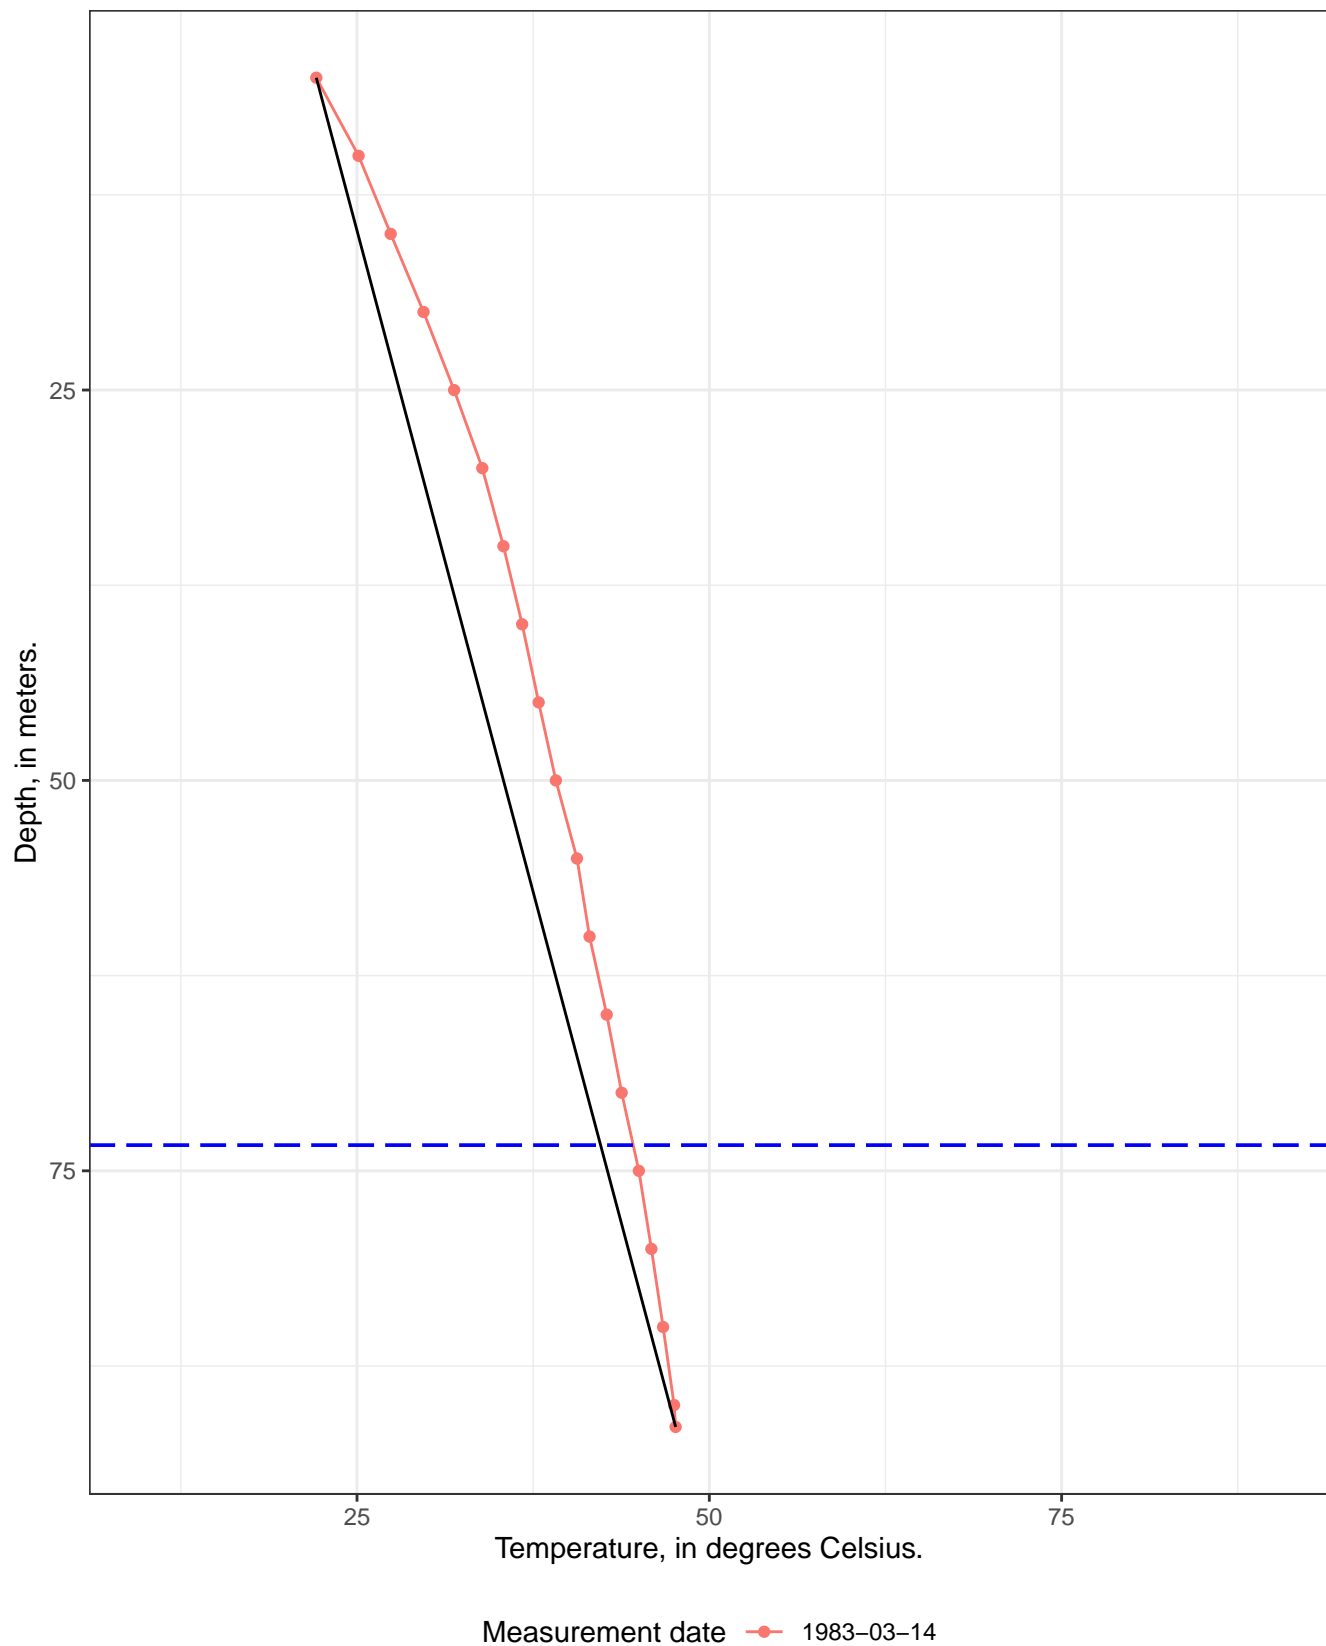

ID: 206 [NASA-WSTF\_BLM-2-630]

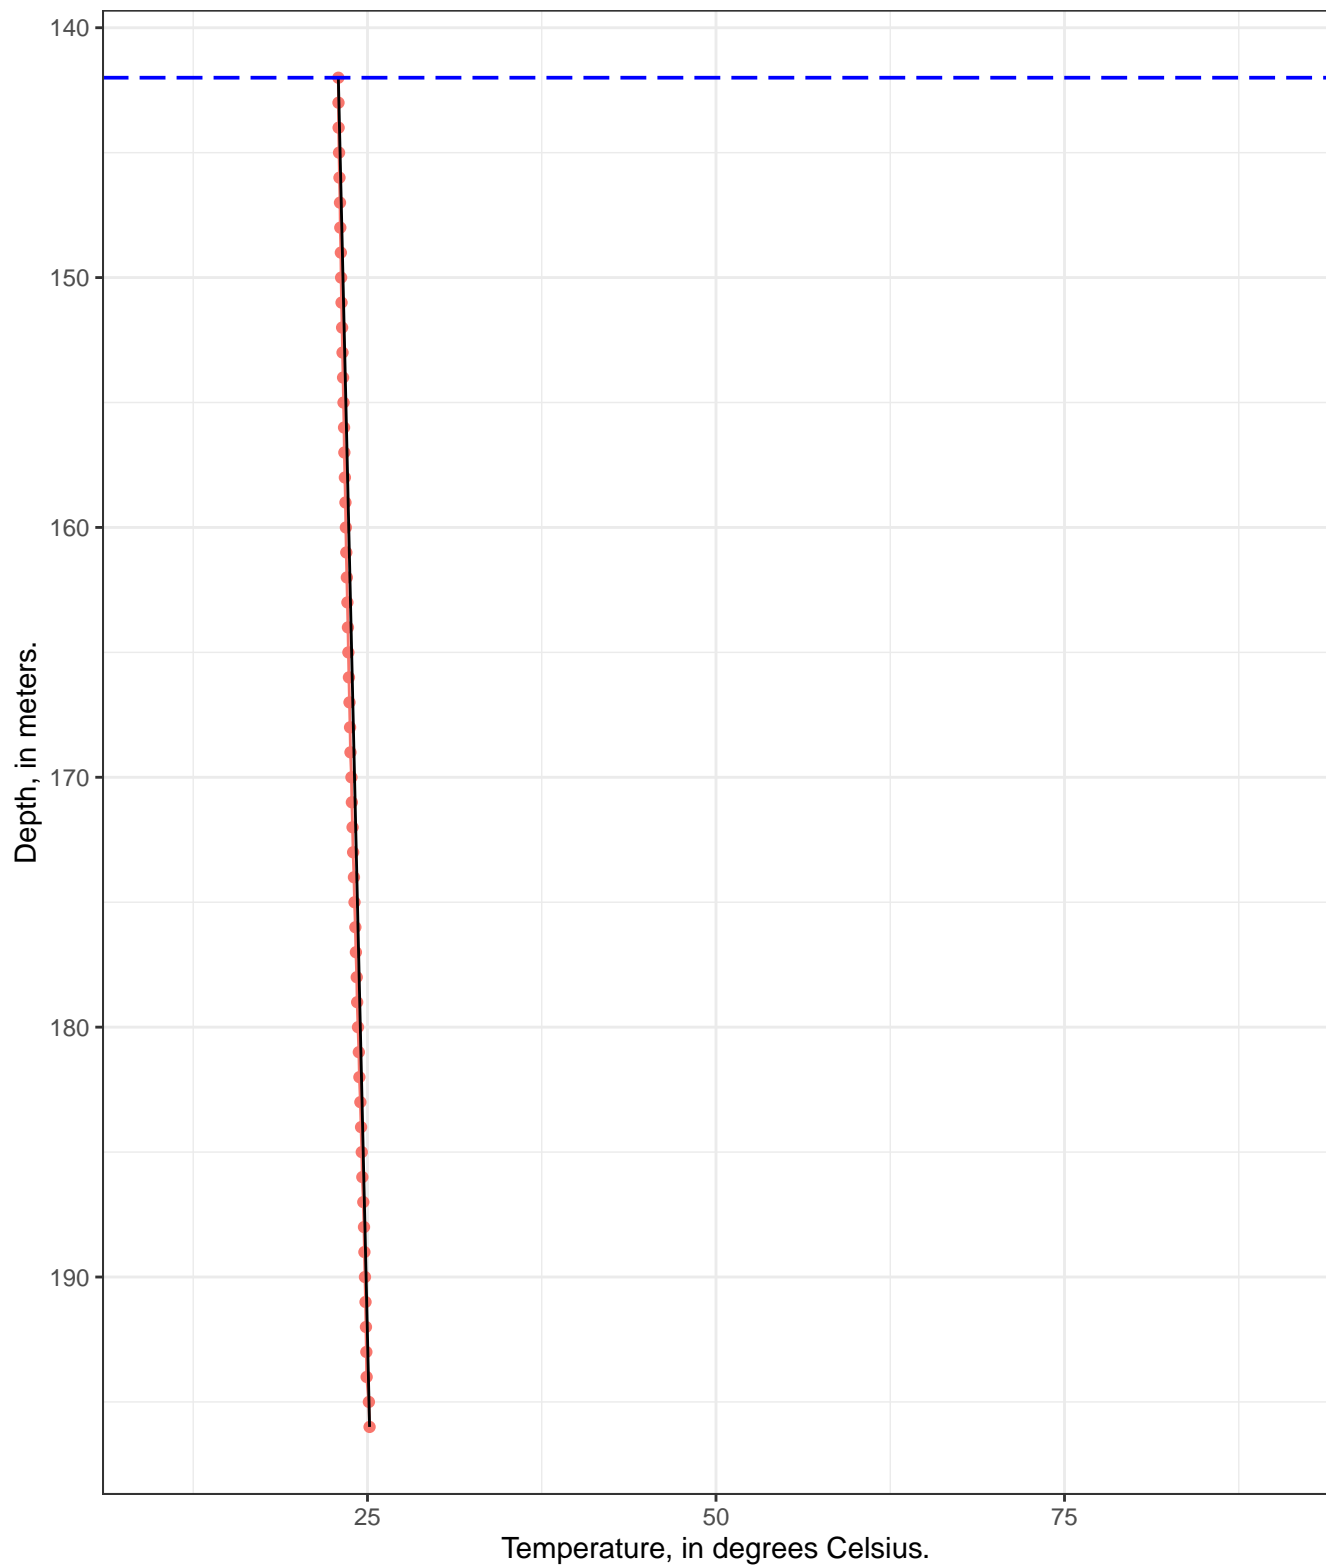

Measurement date 1989-04-13

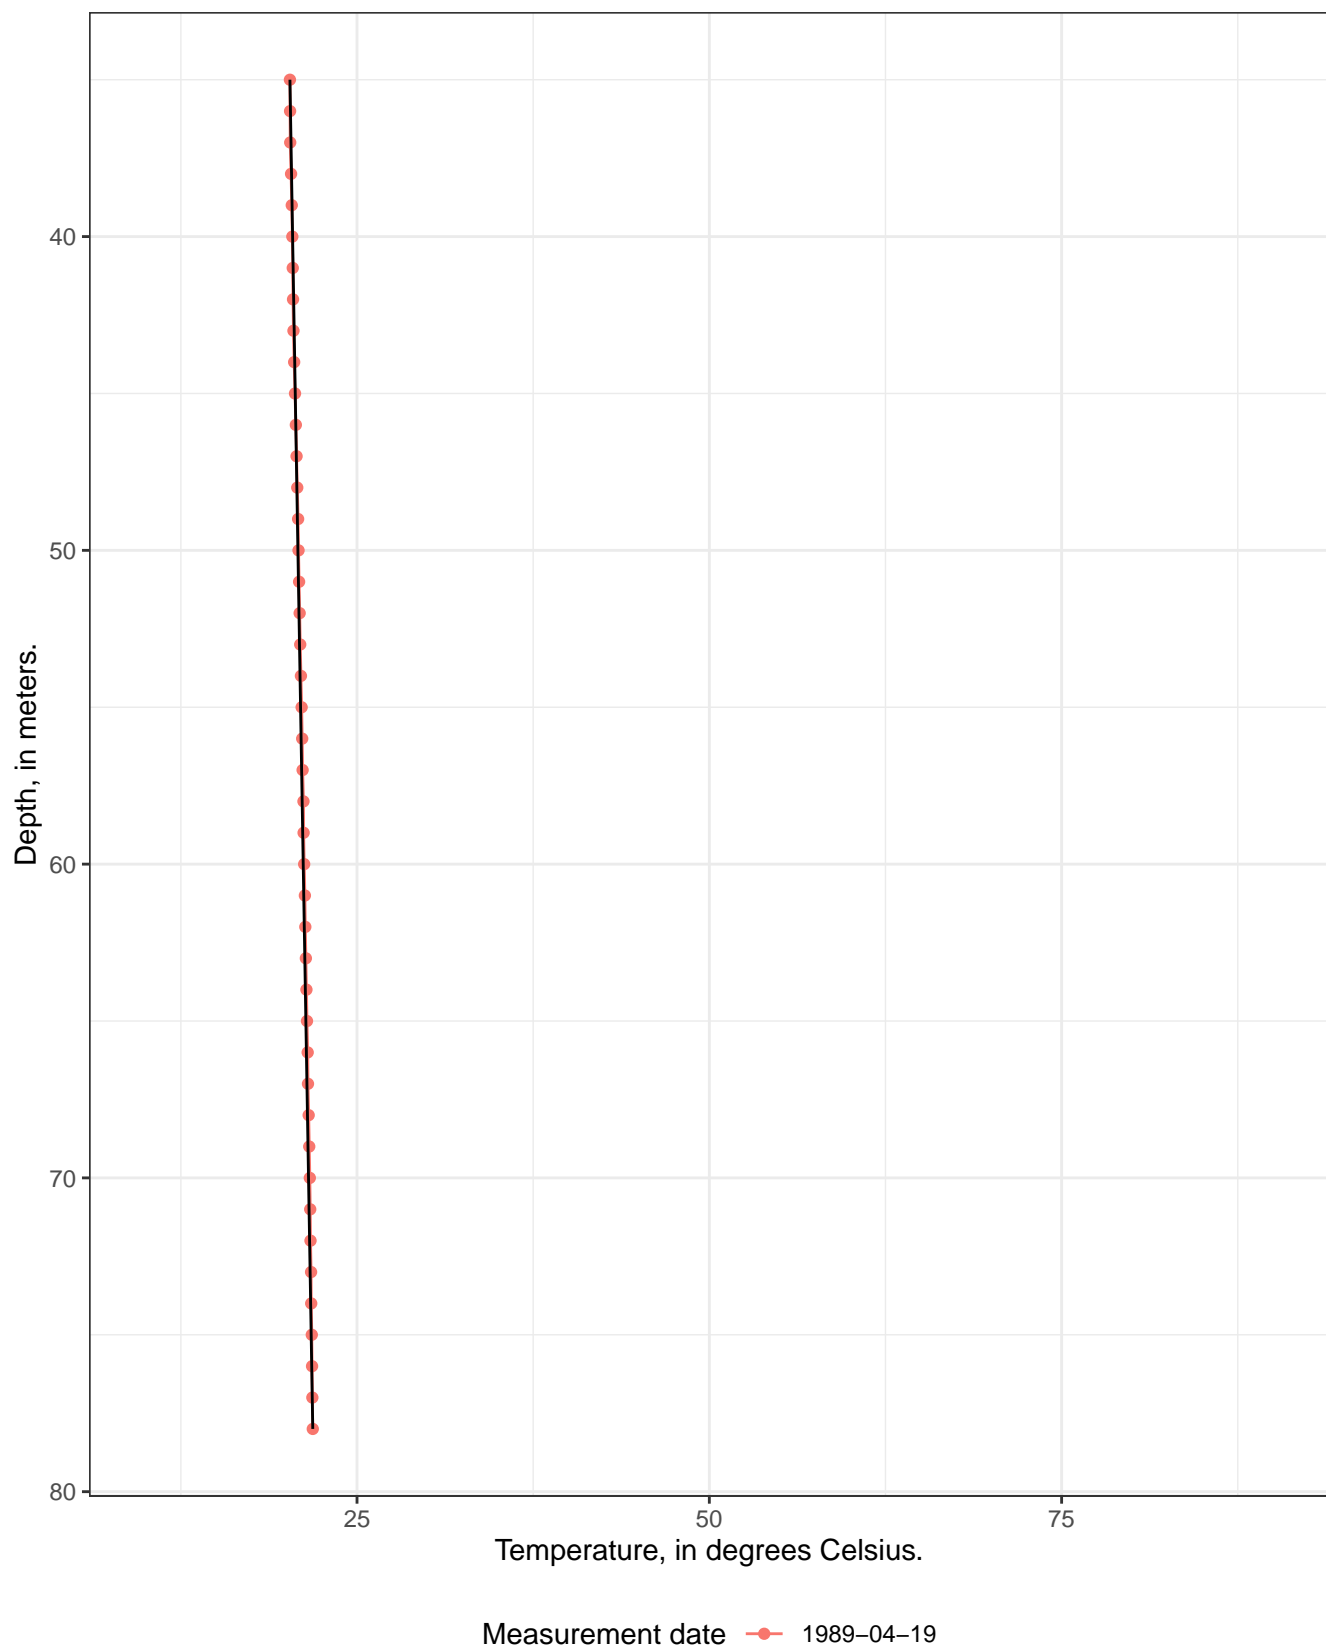



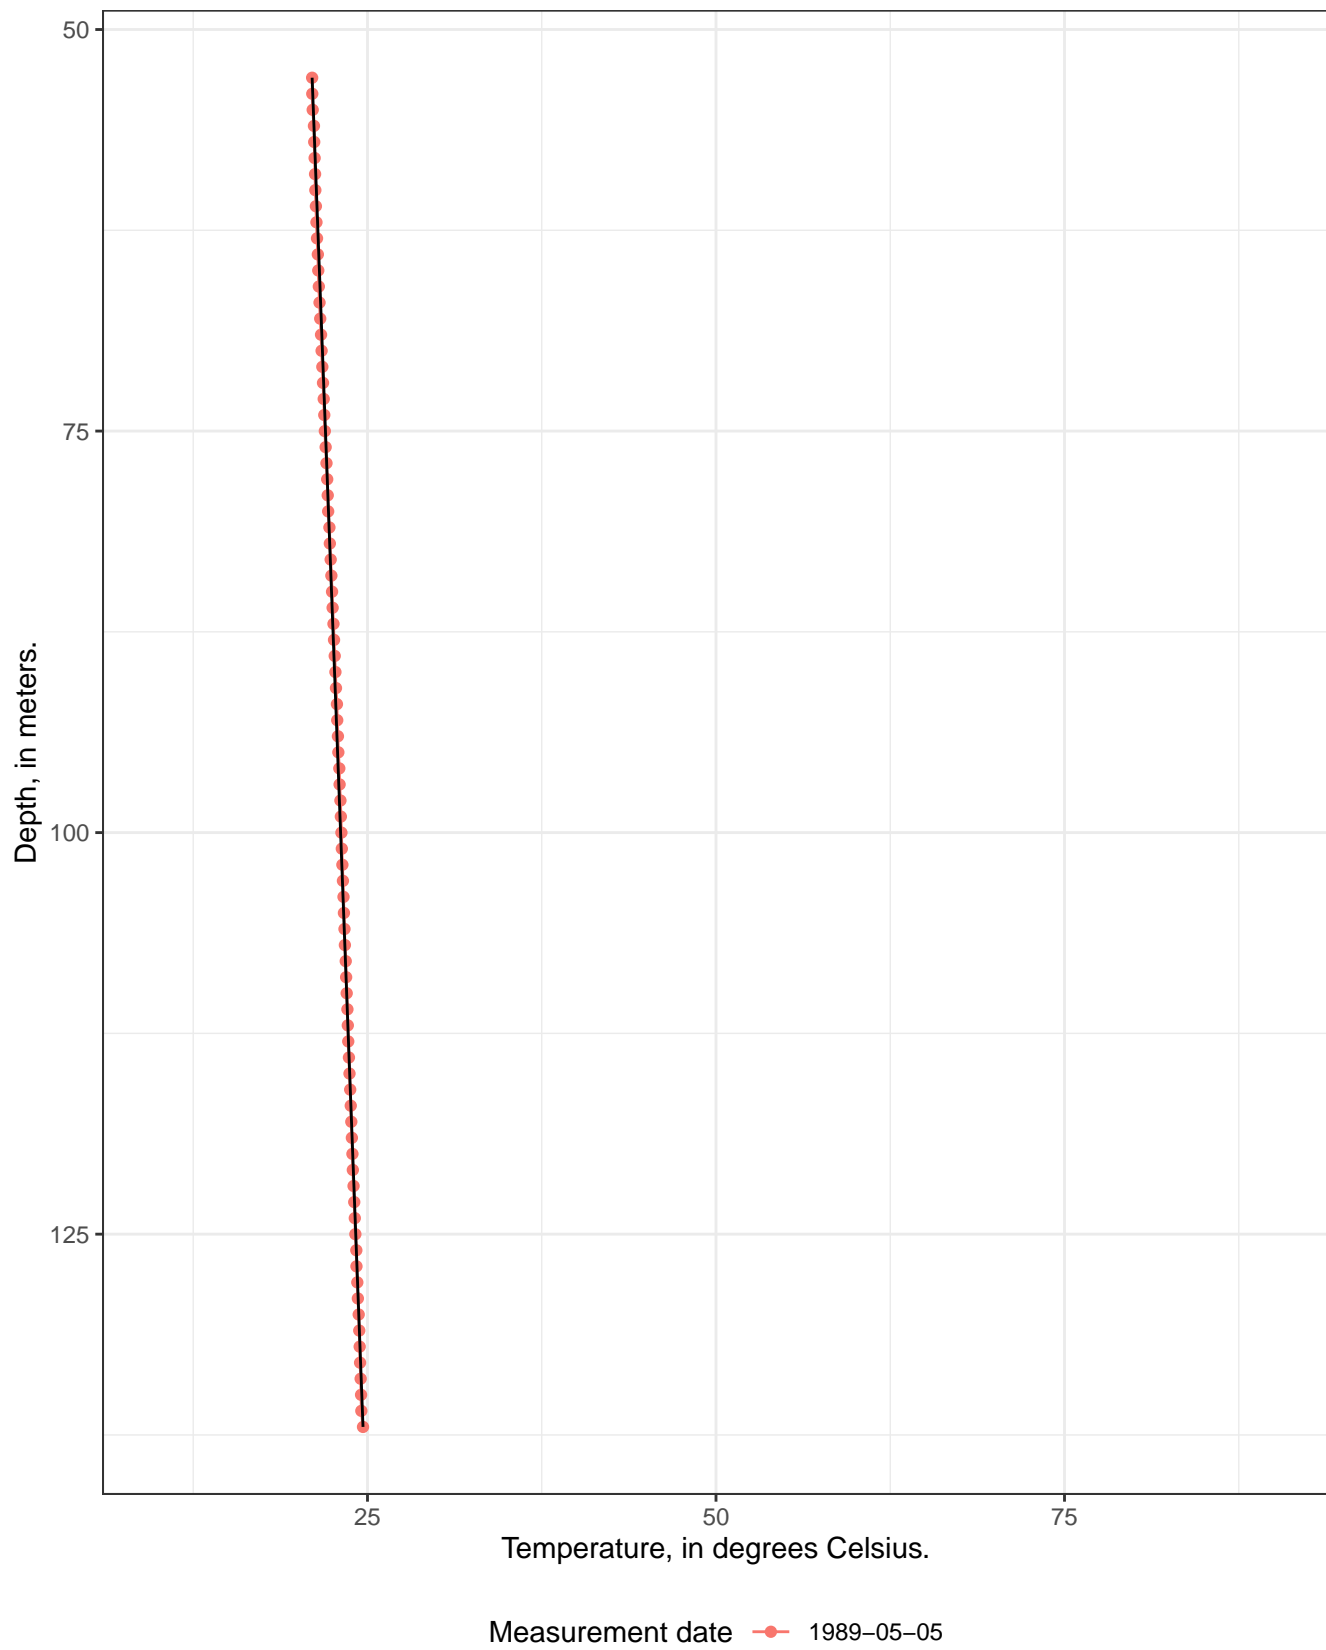

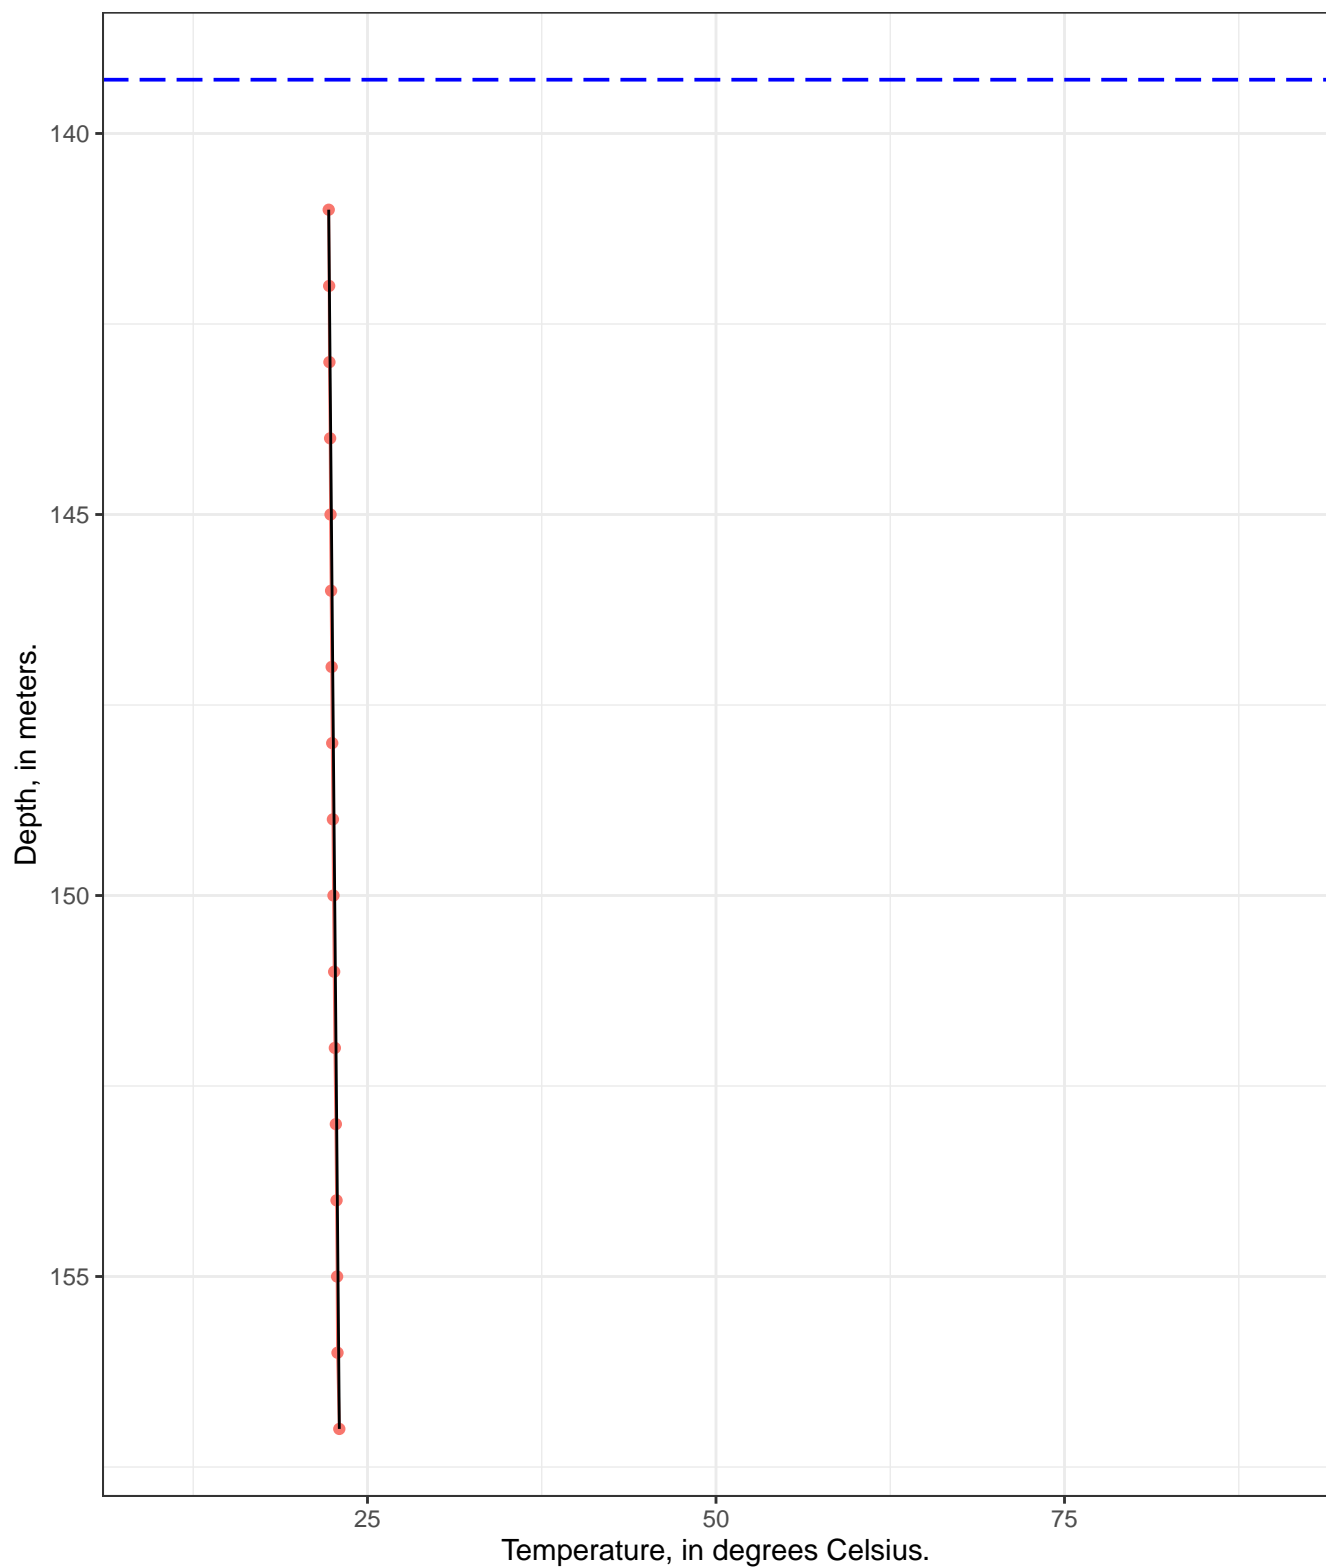

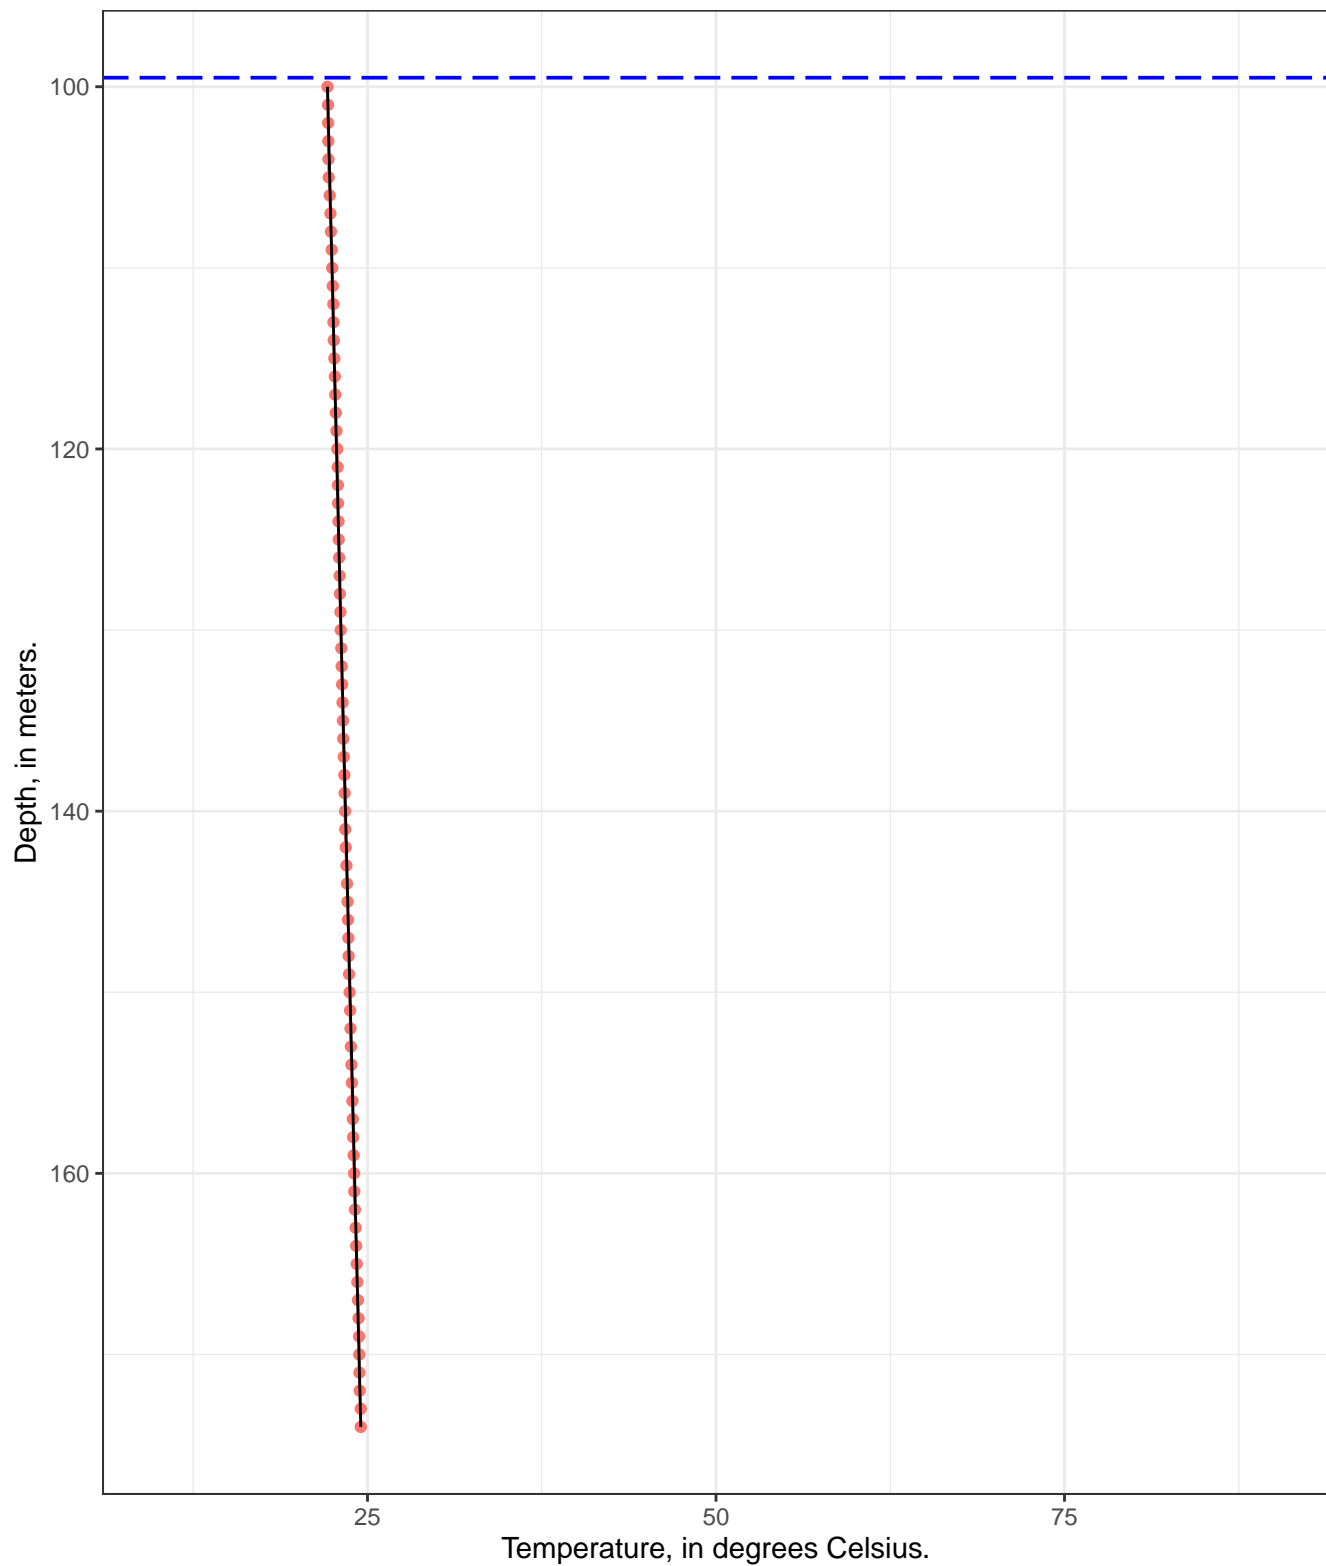

Measurement date —●— 1989-04-28

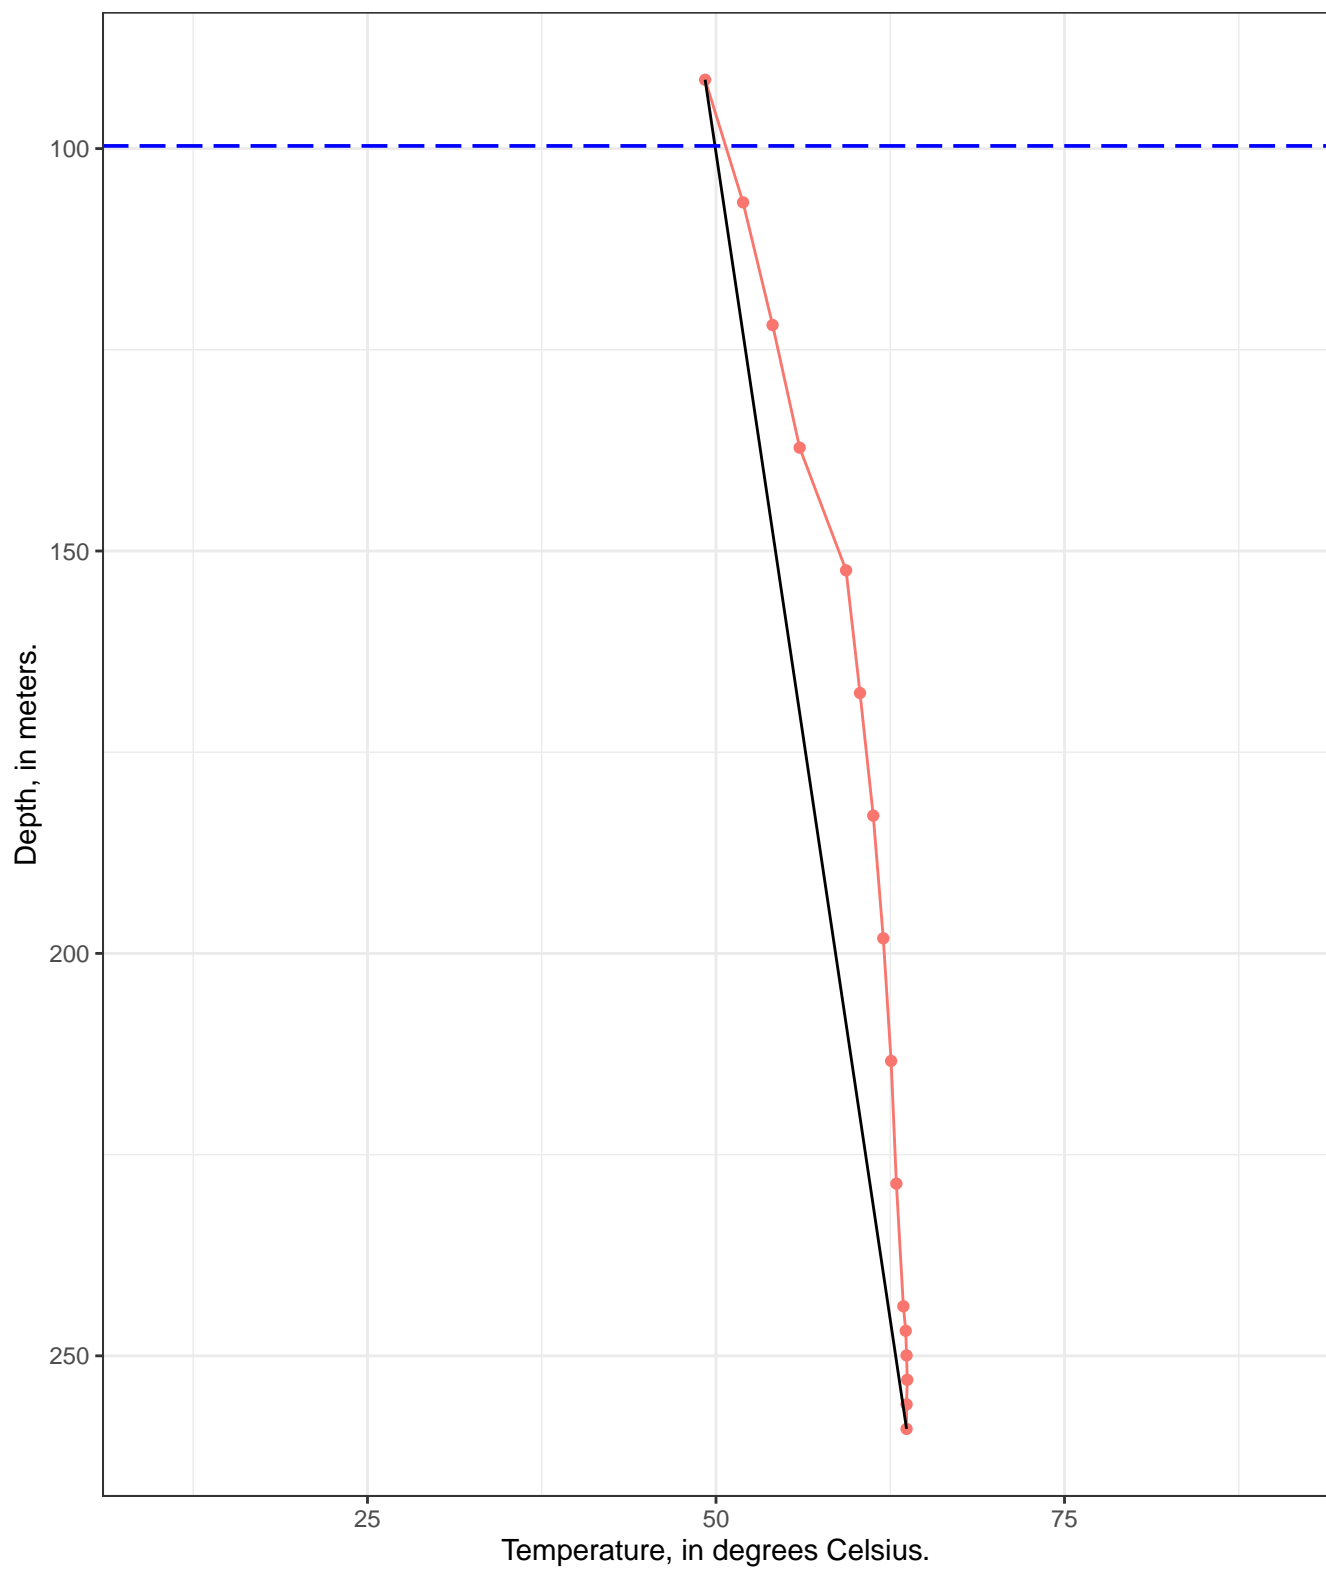

Measurement date 1980-01-01

ID: 212 [Organ]

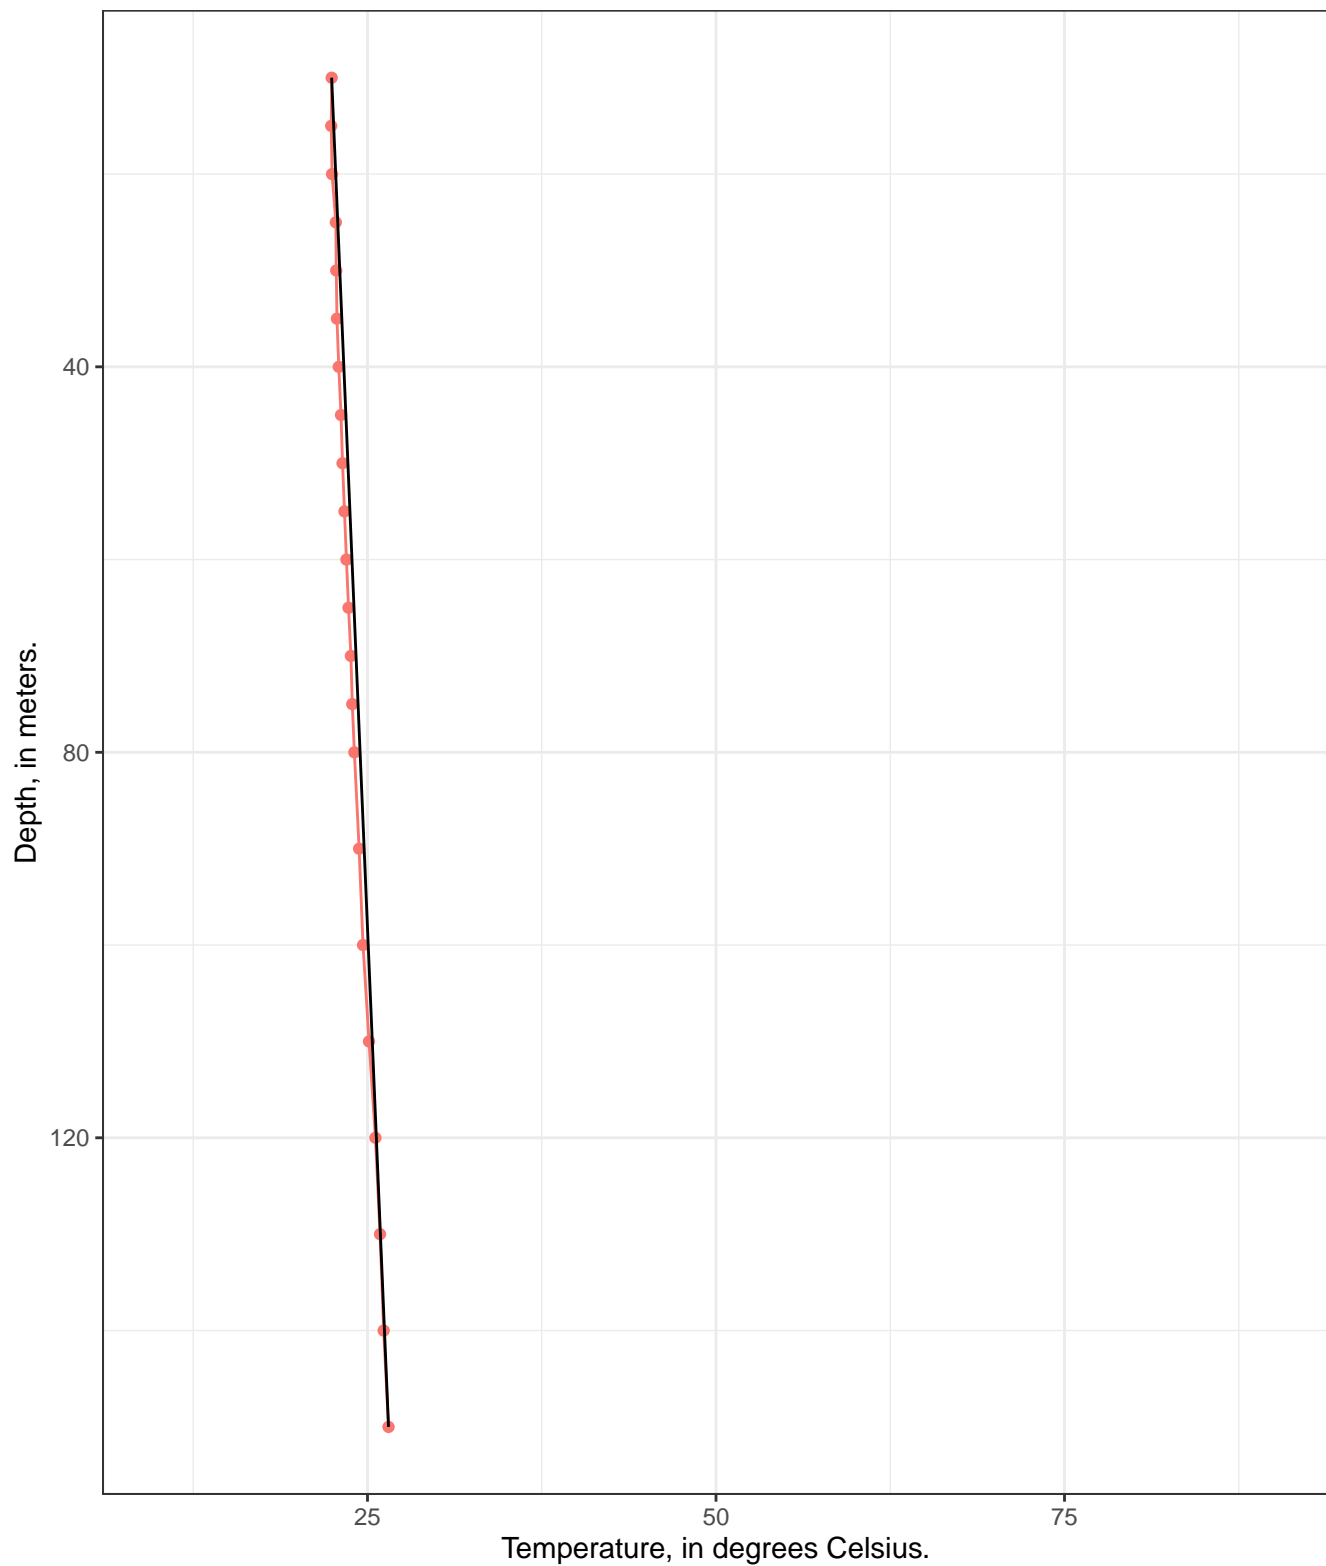

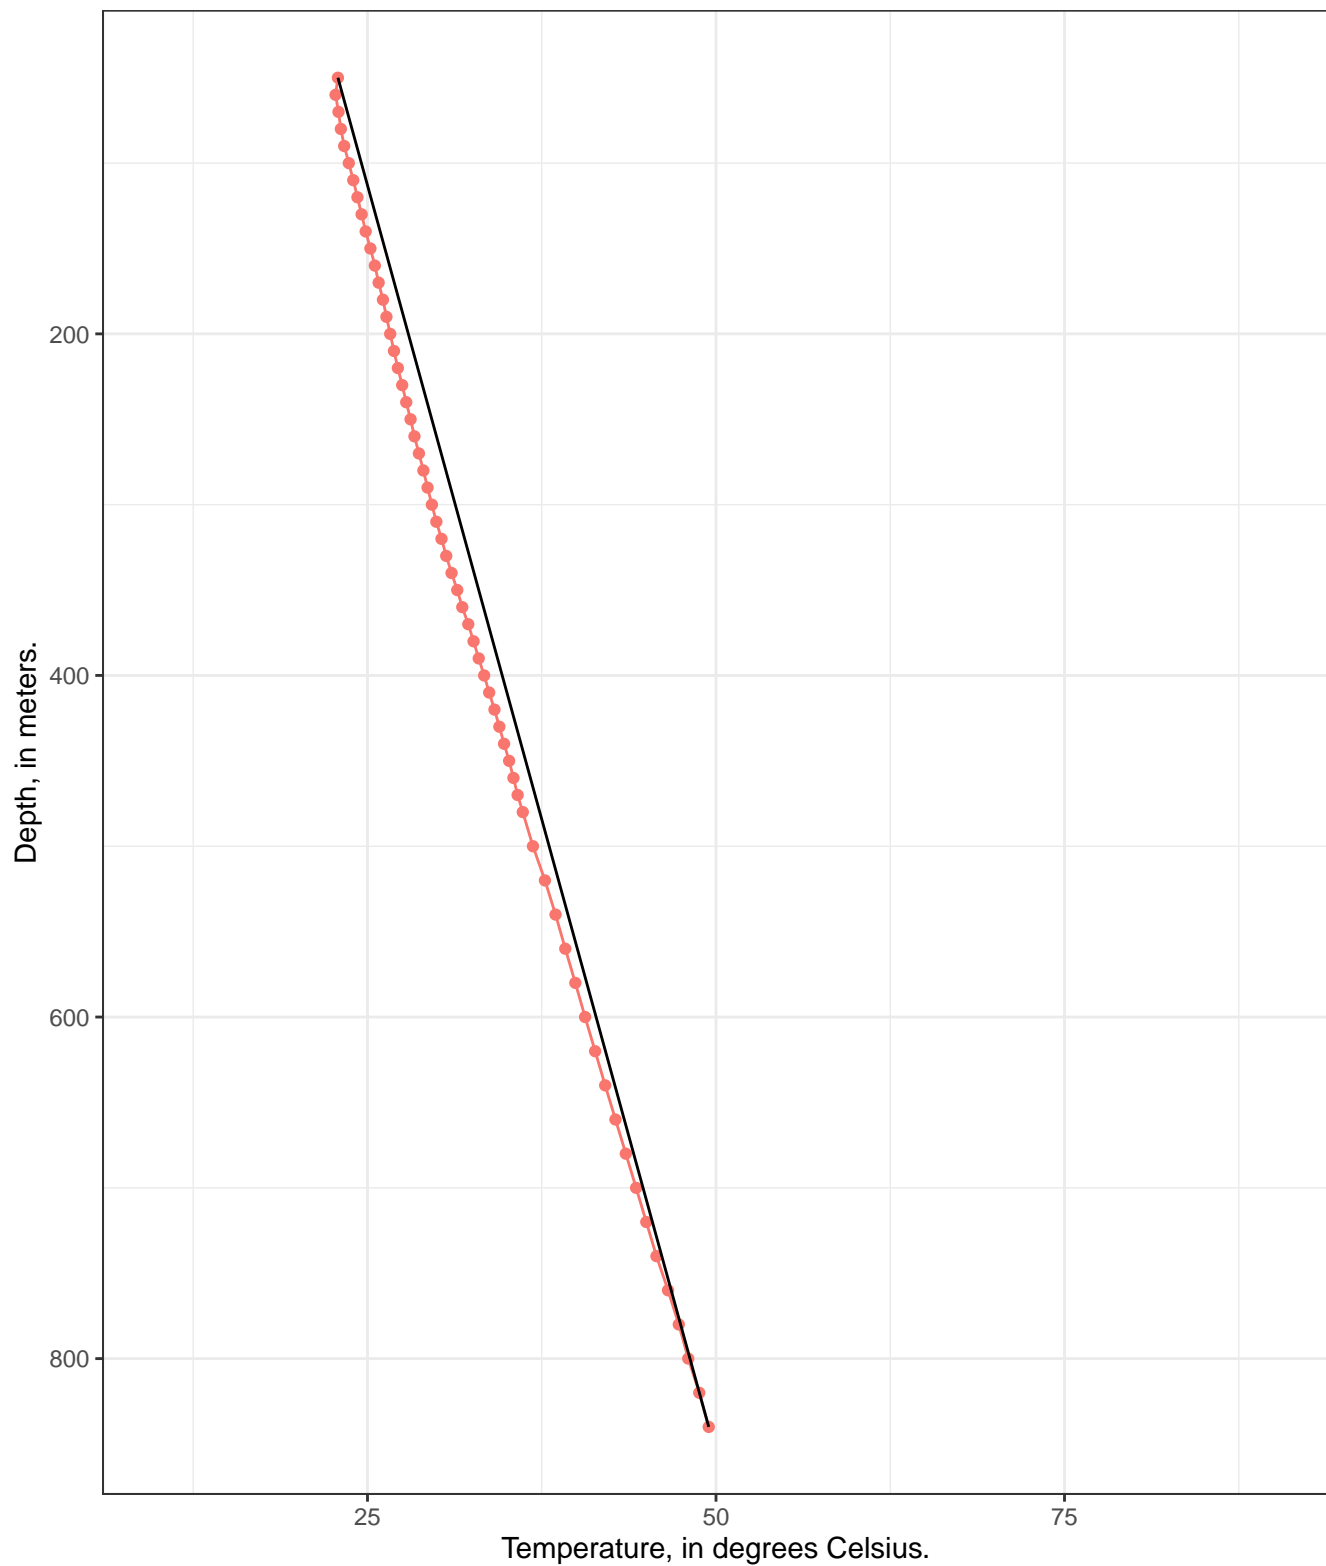

Measurement date —●— 1974-06-24

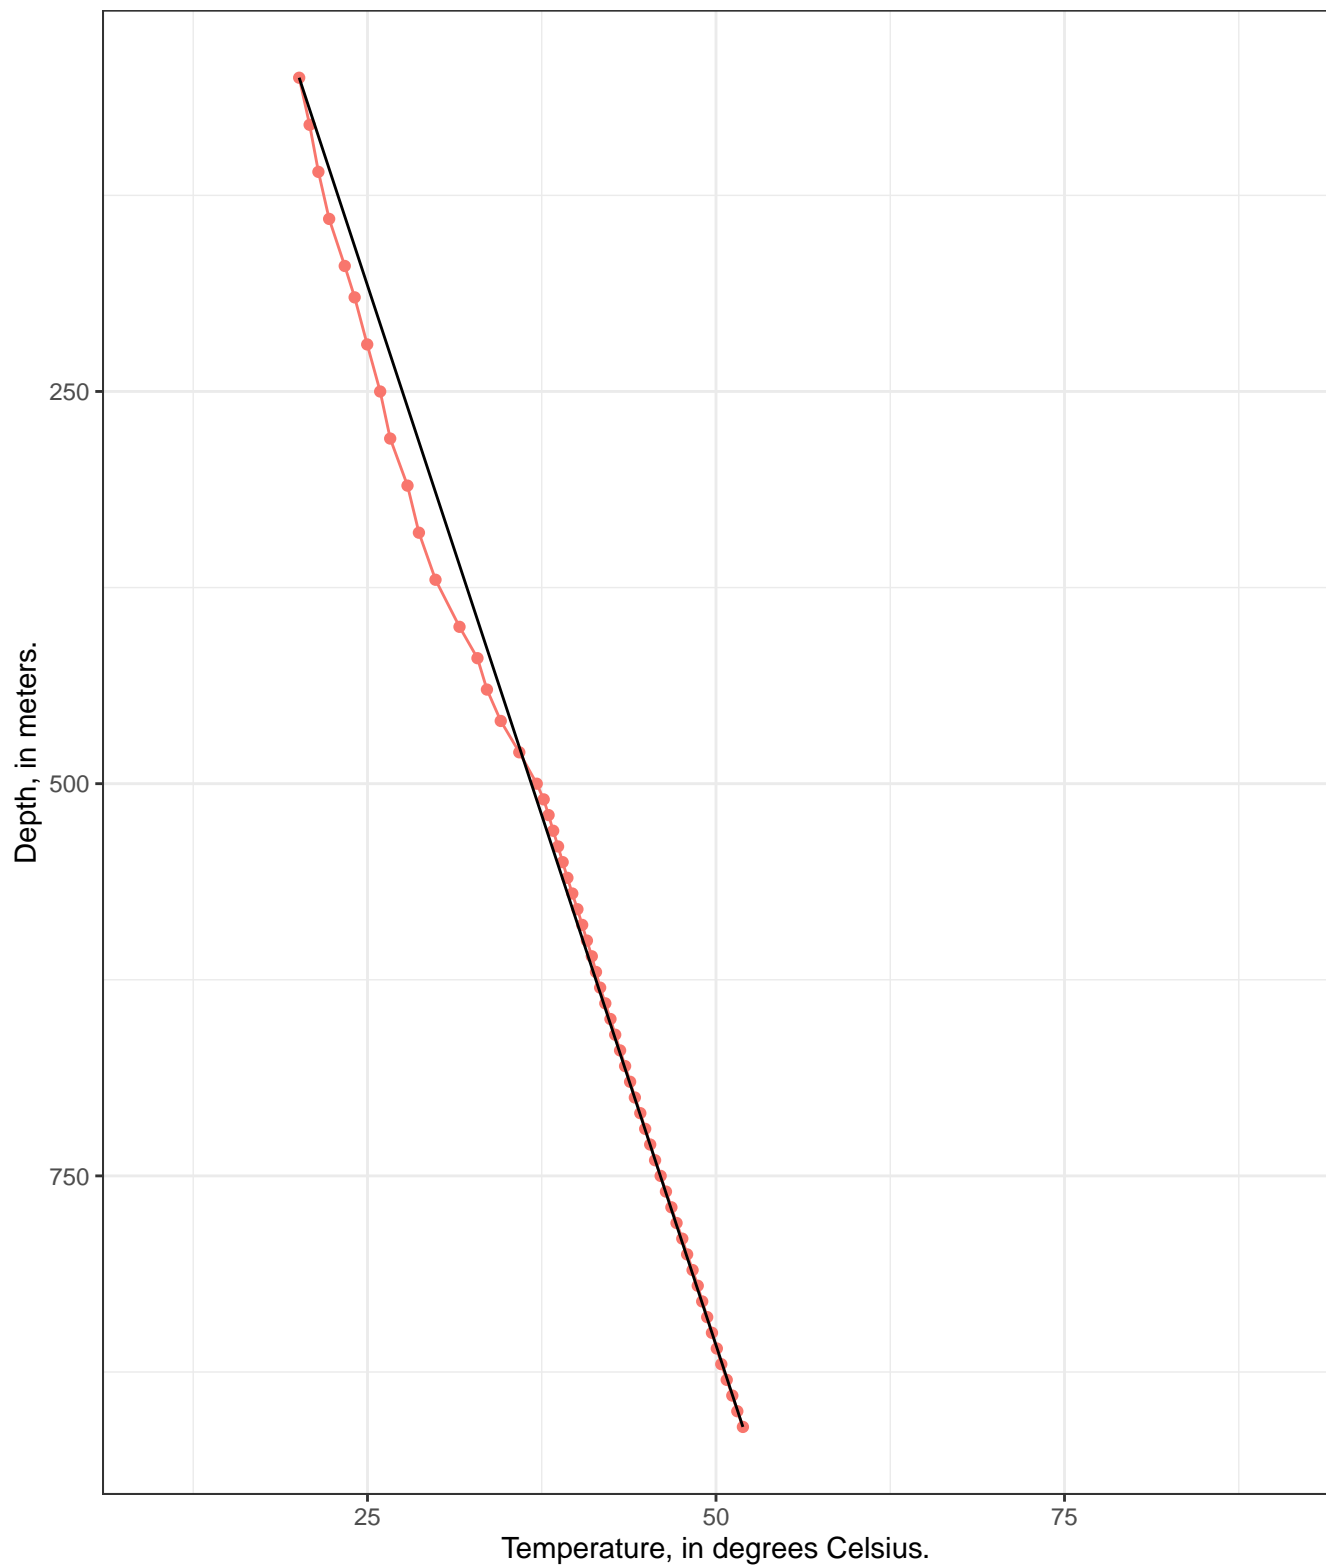

Measurement date 1975-02-18

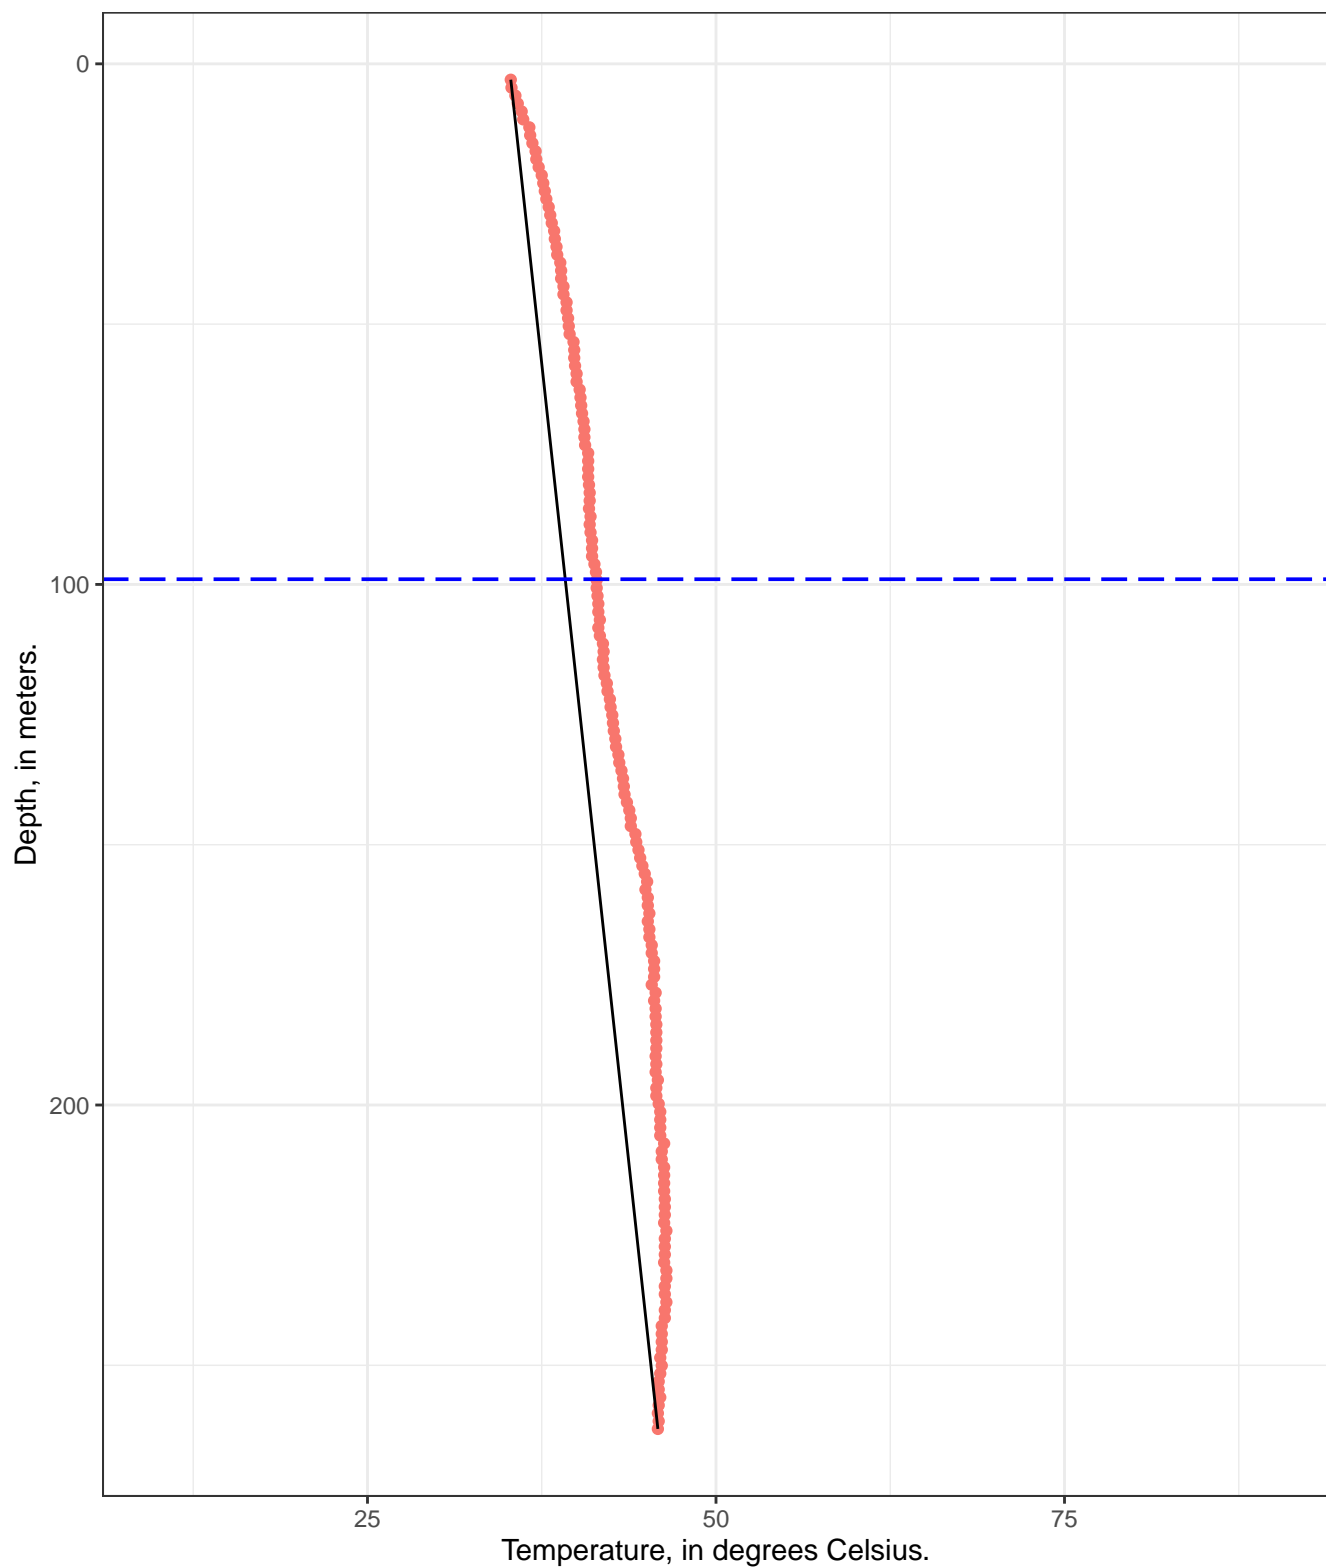

Measurement date 1979-10-17



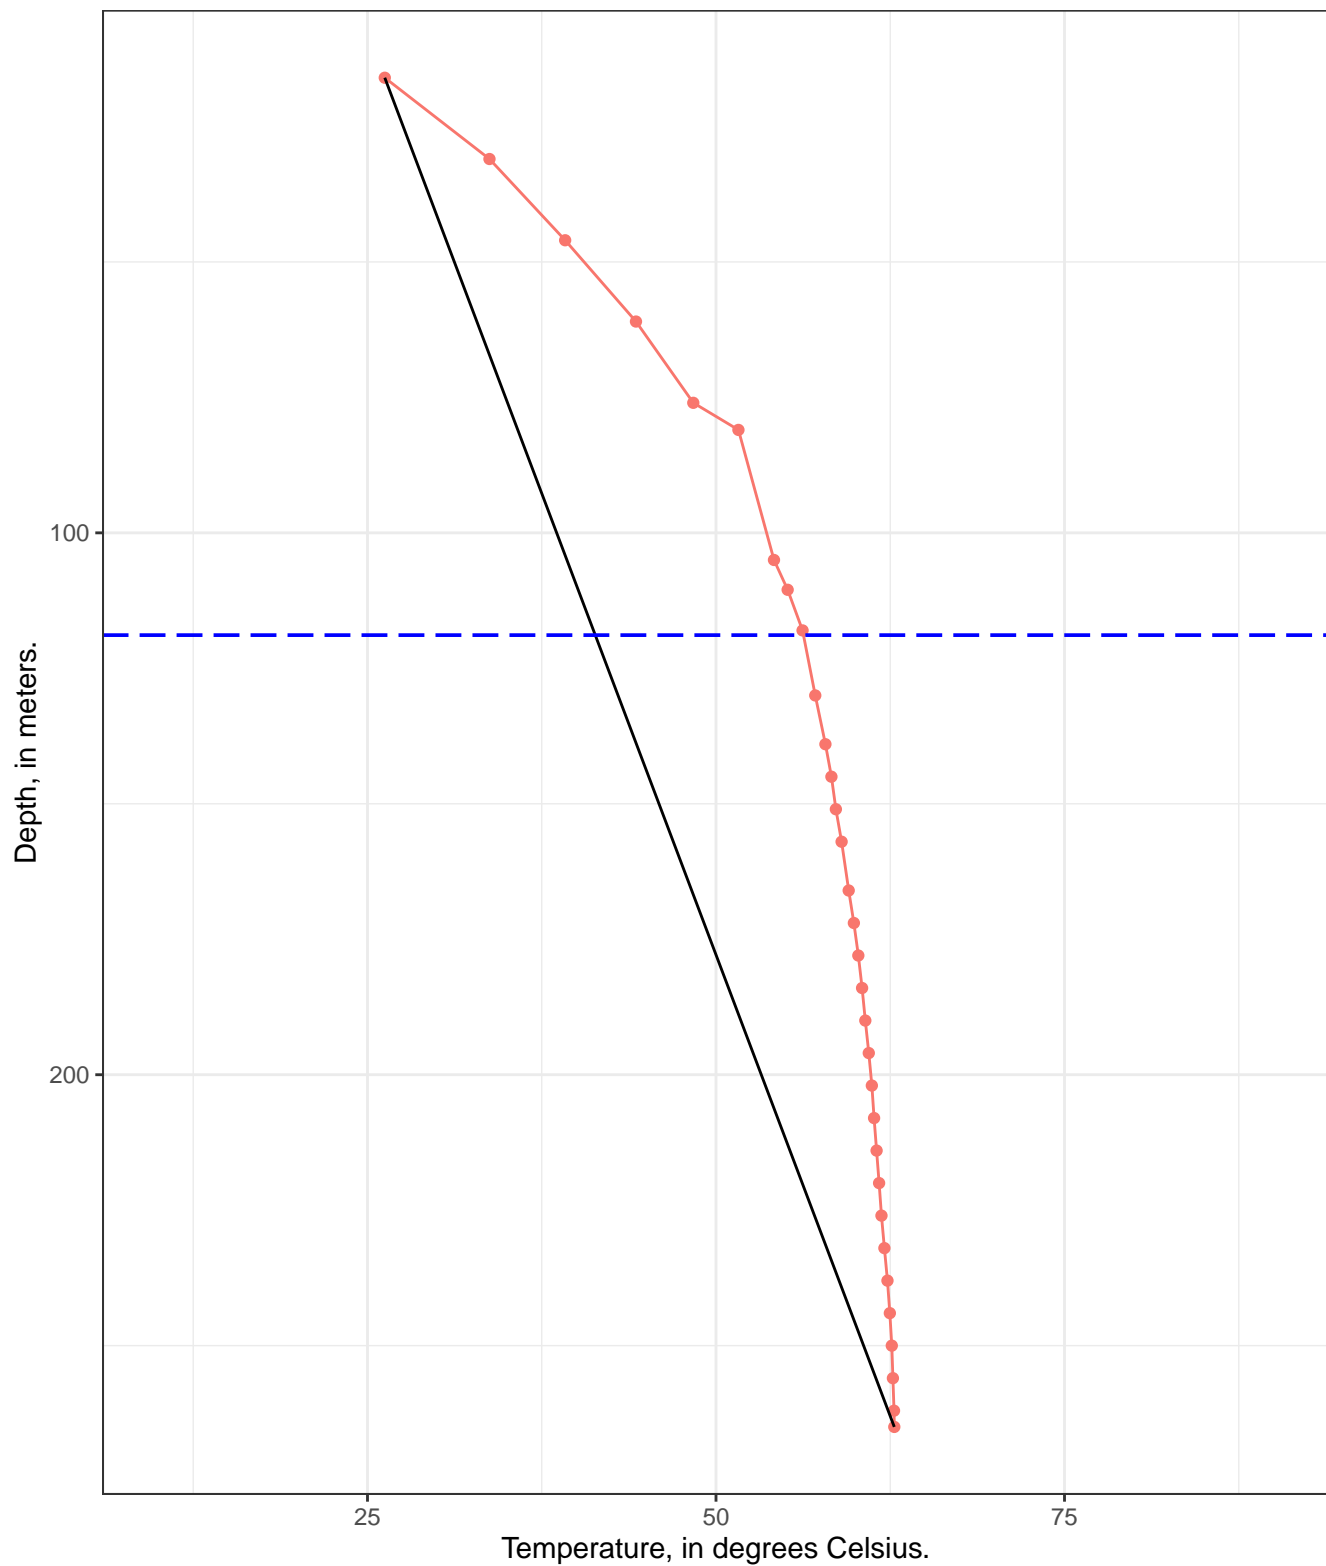

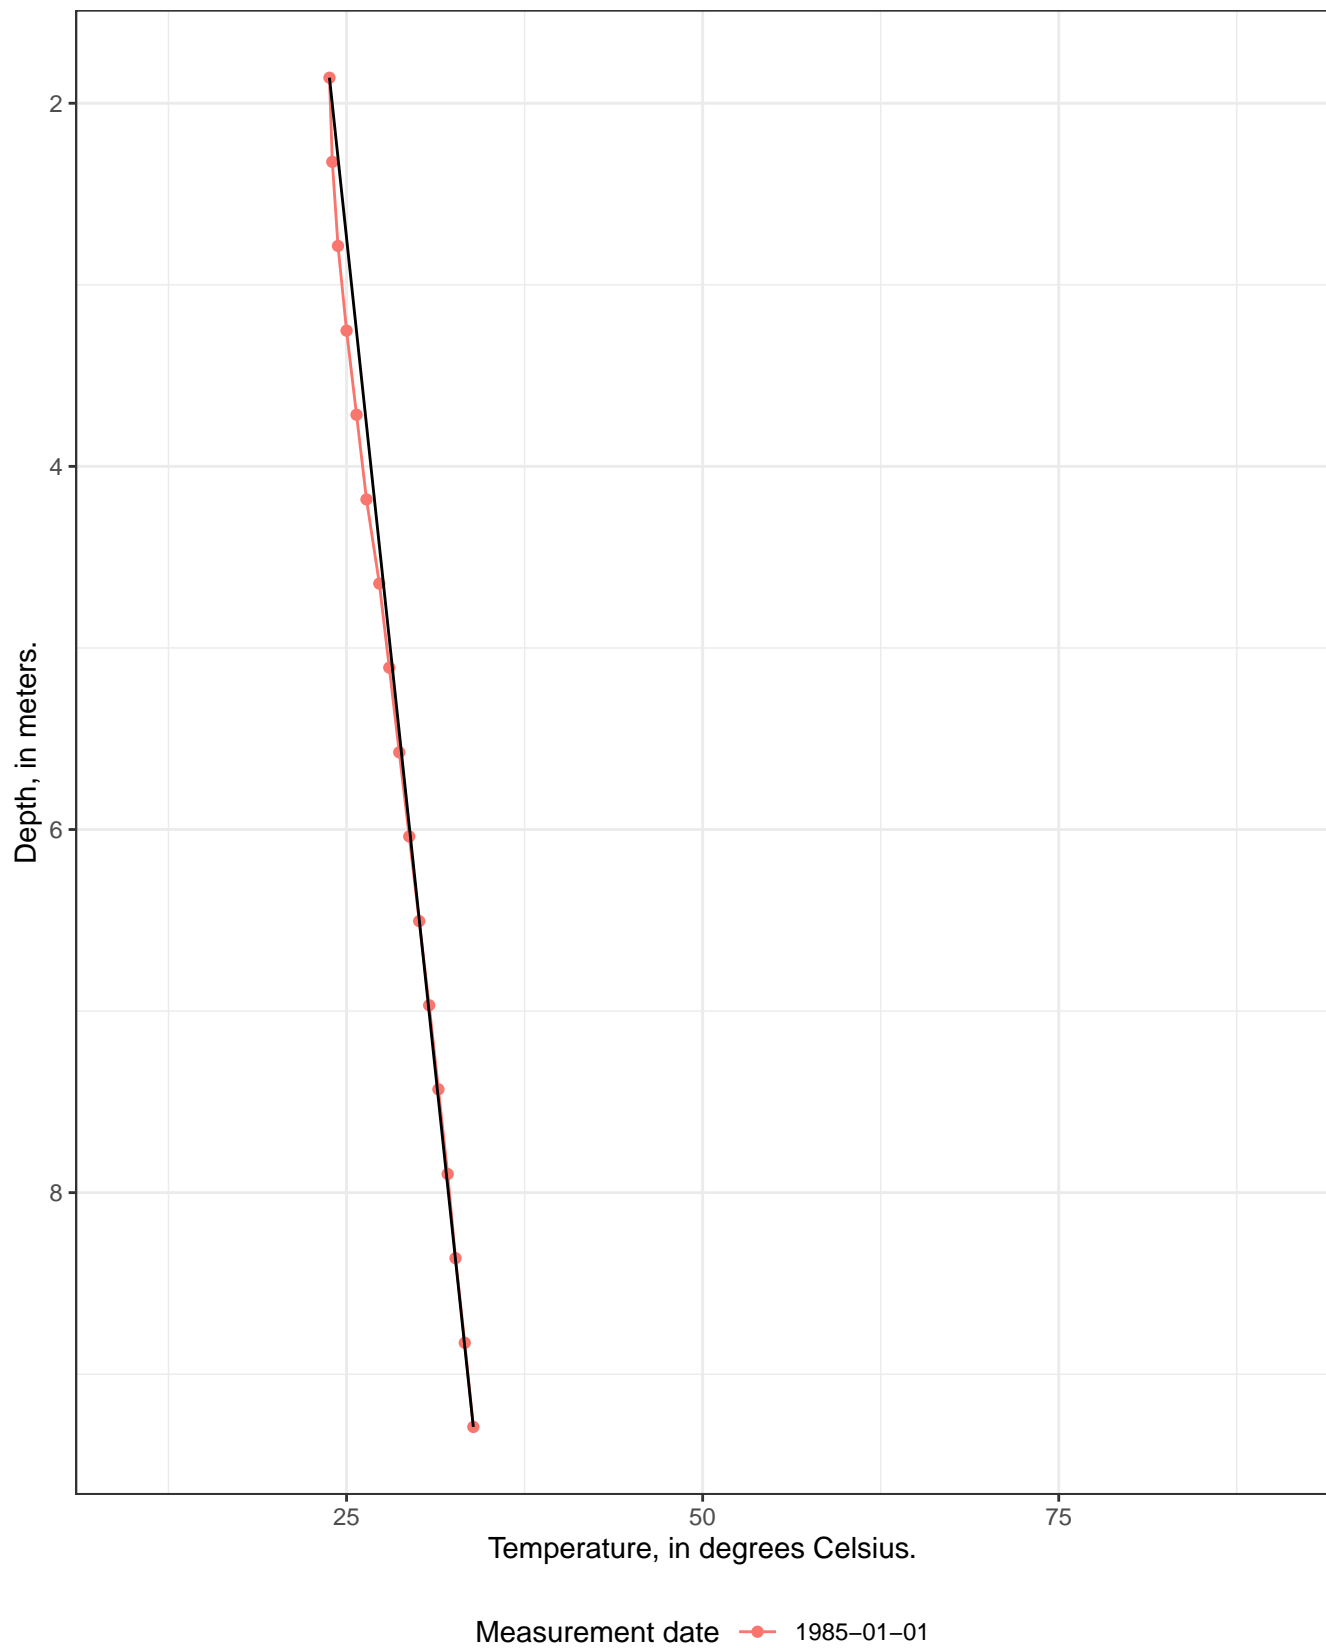

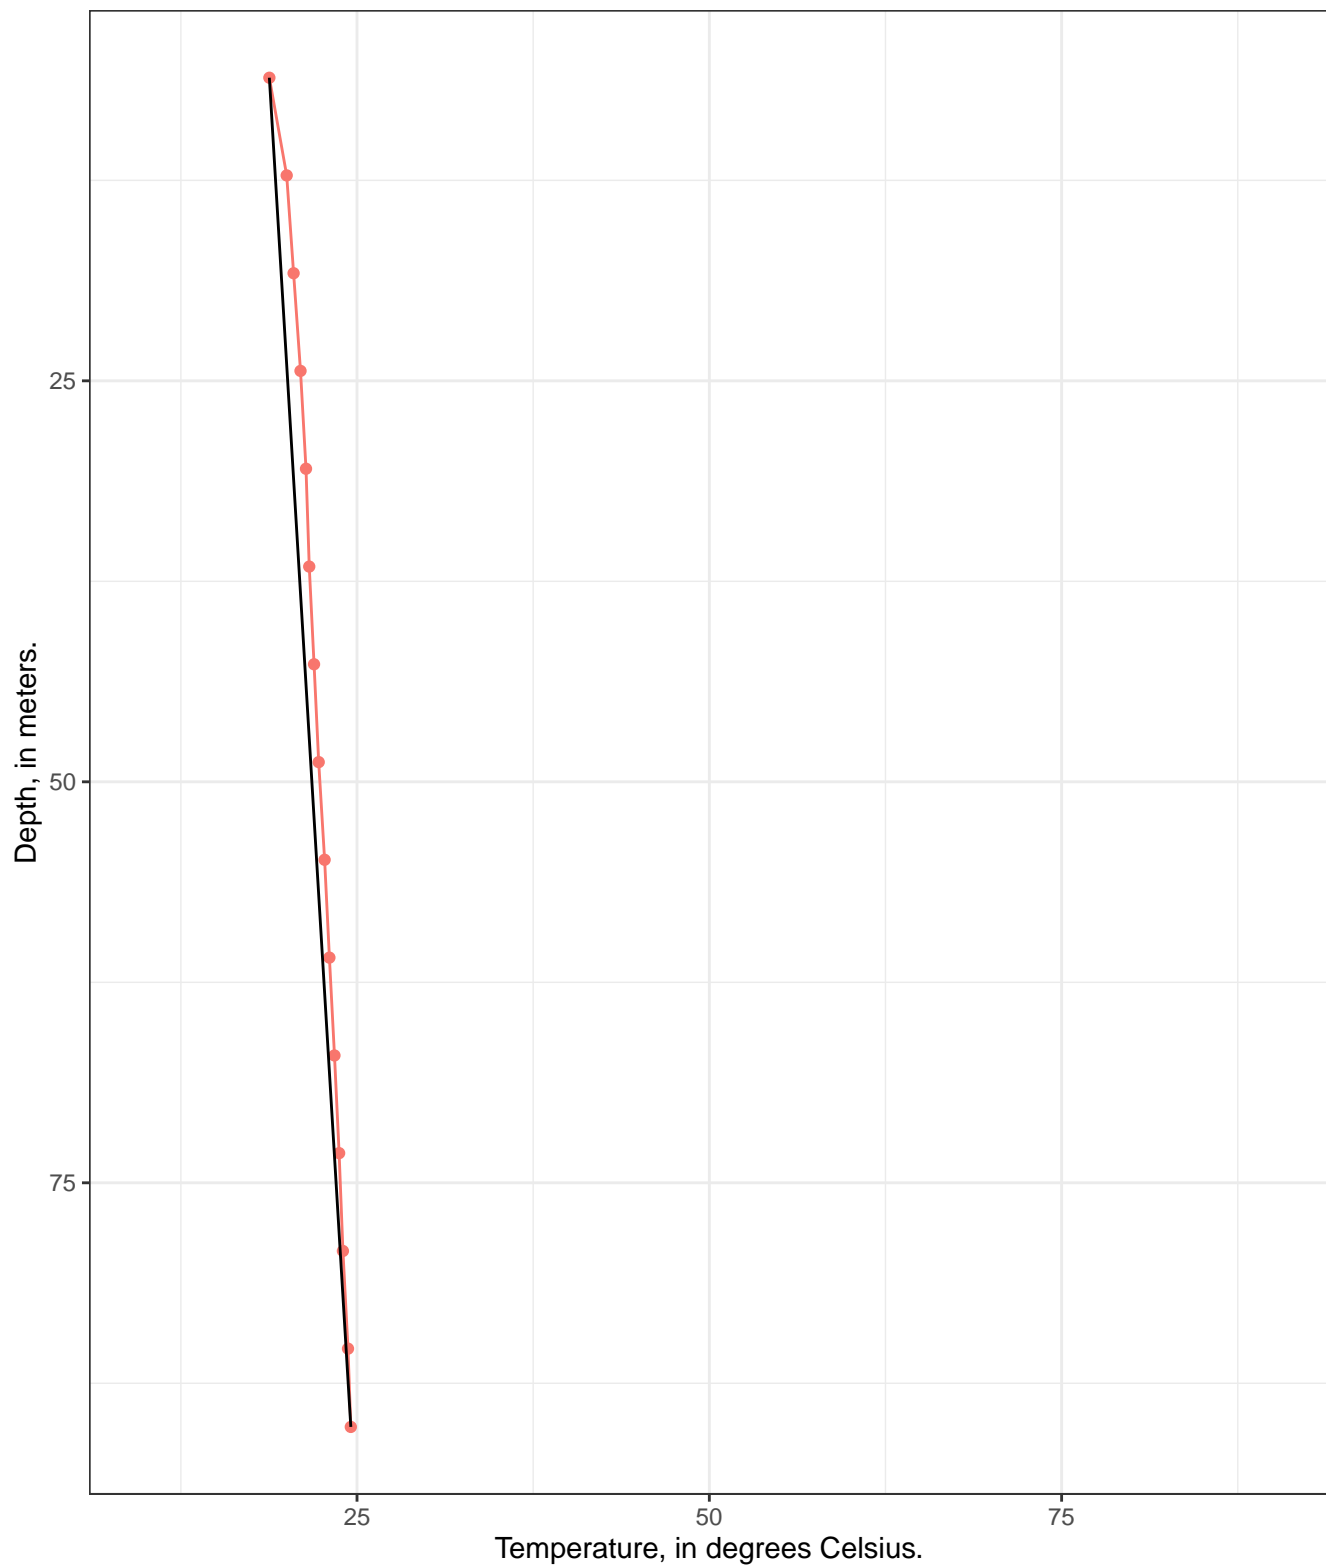

ID: 219 [Phillips\_KH-2]

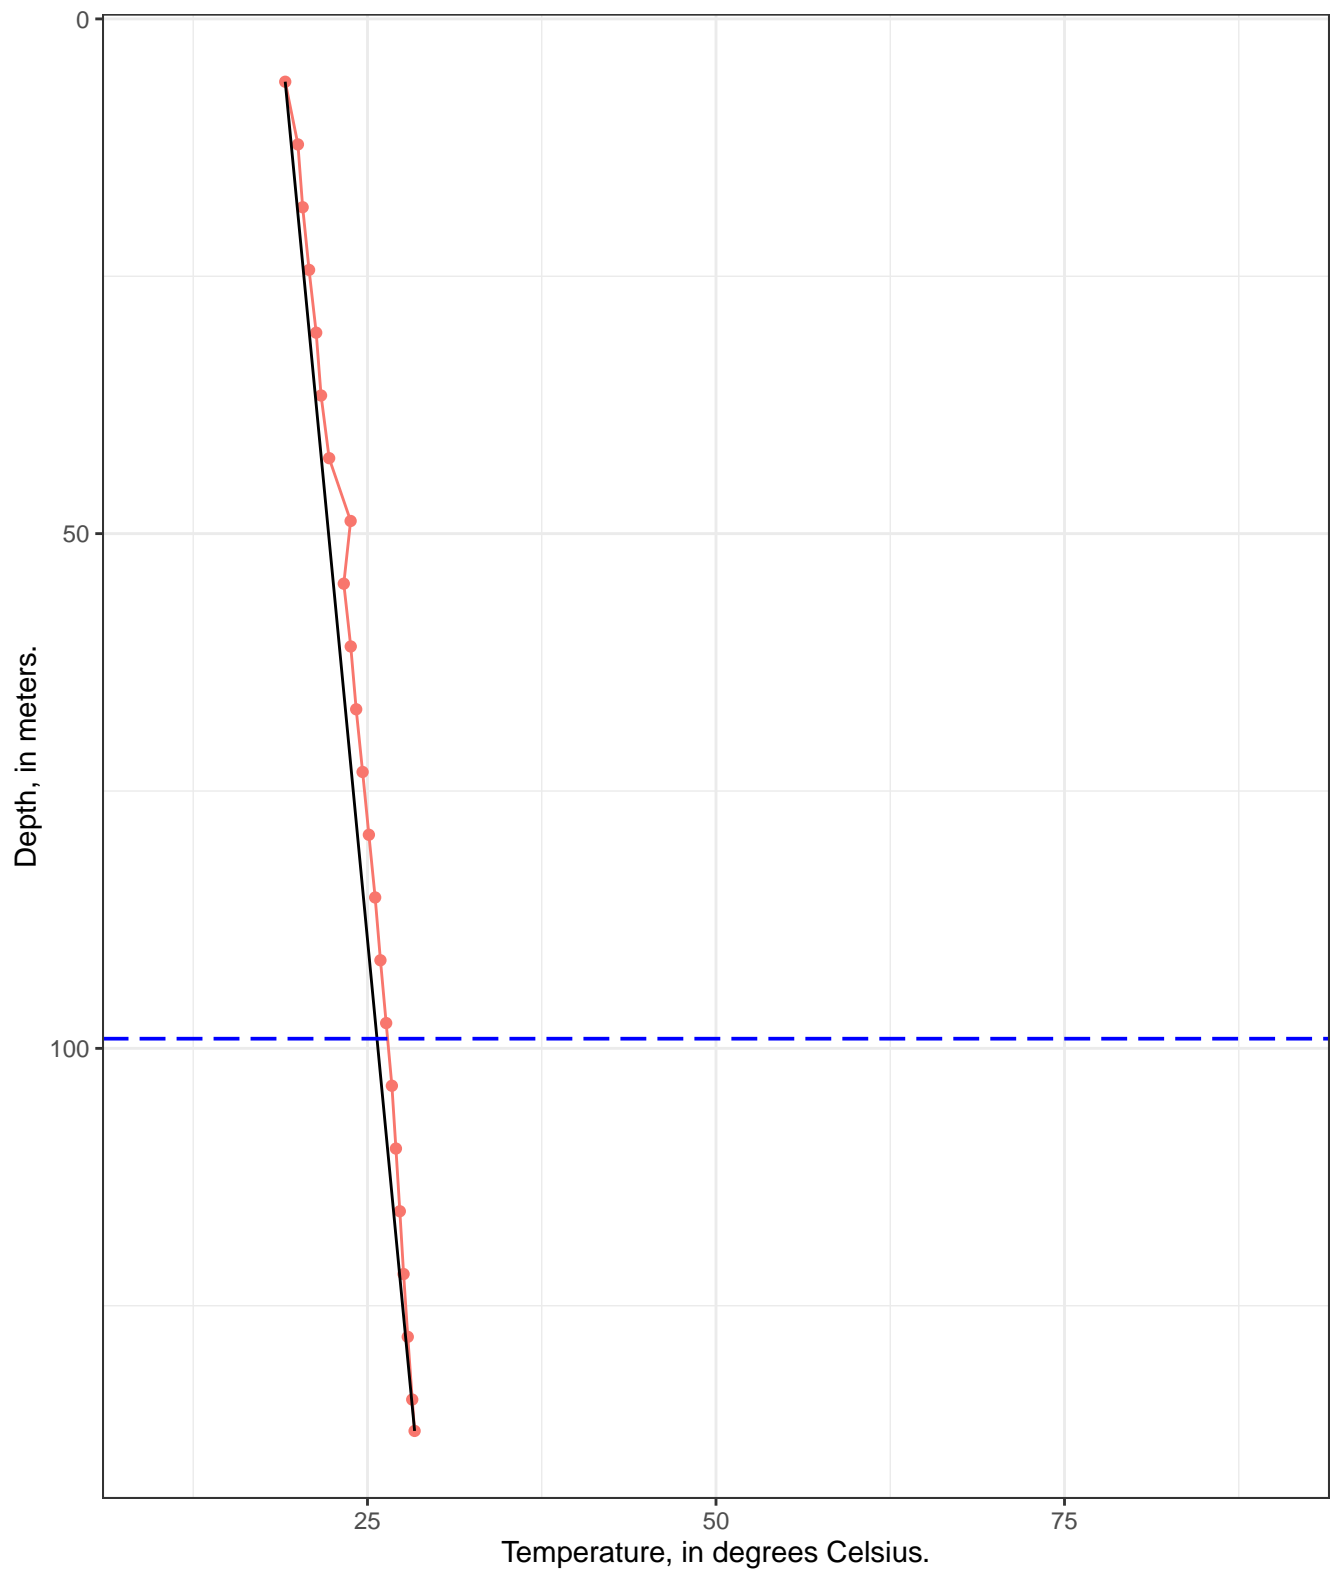

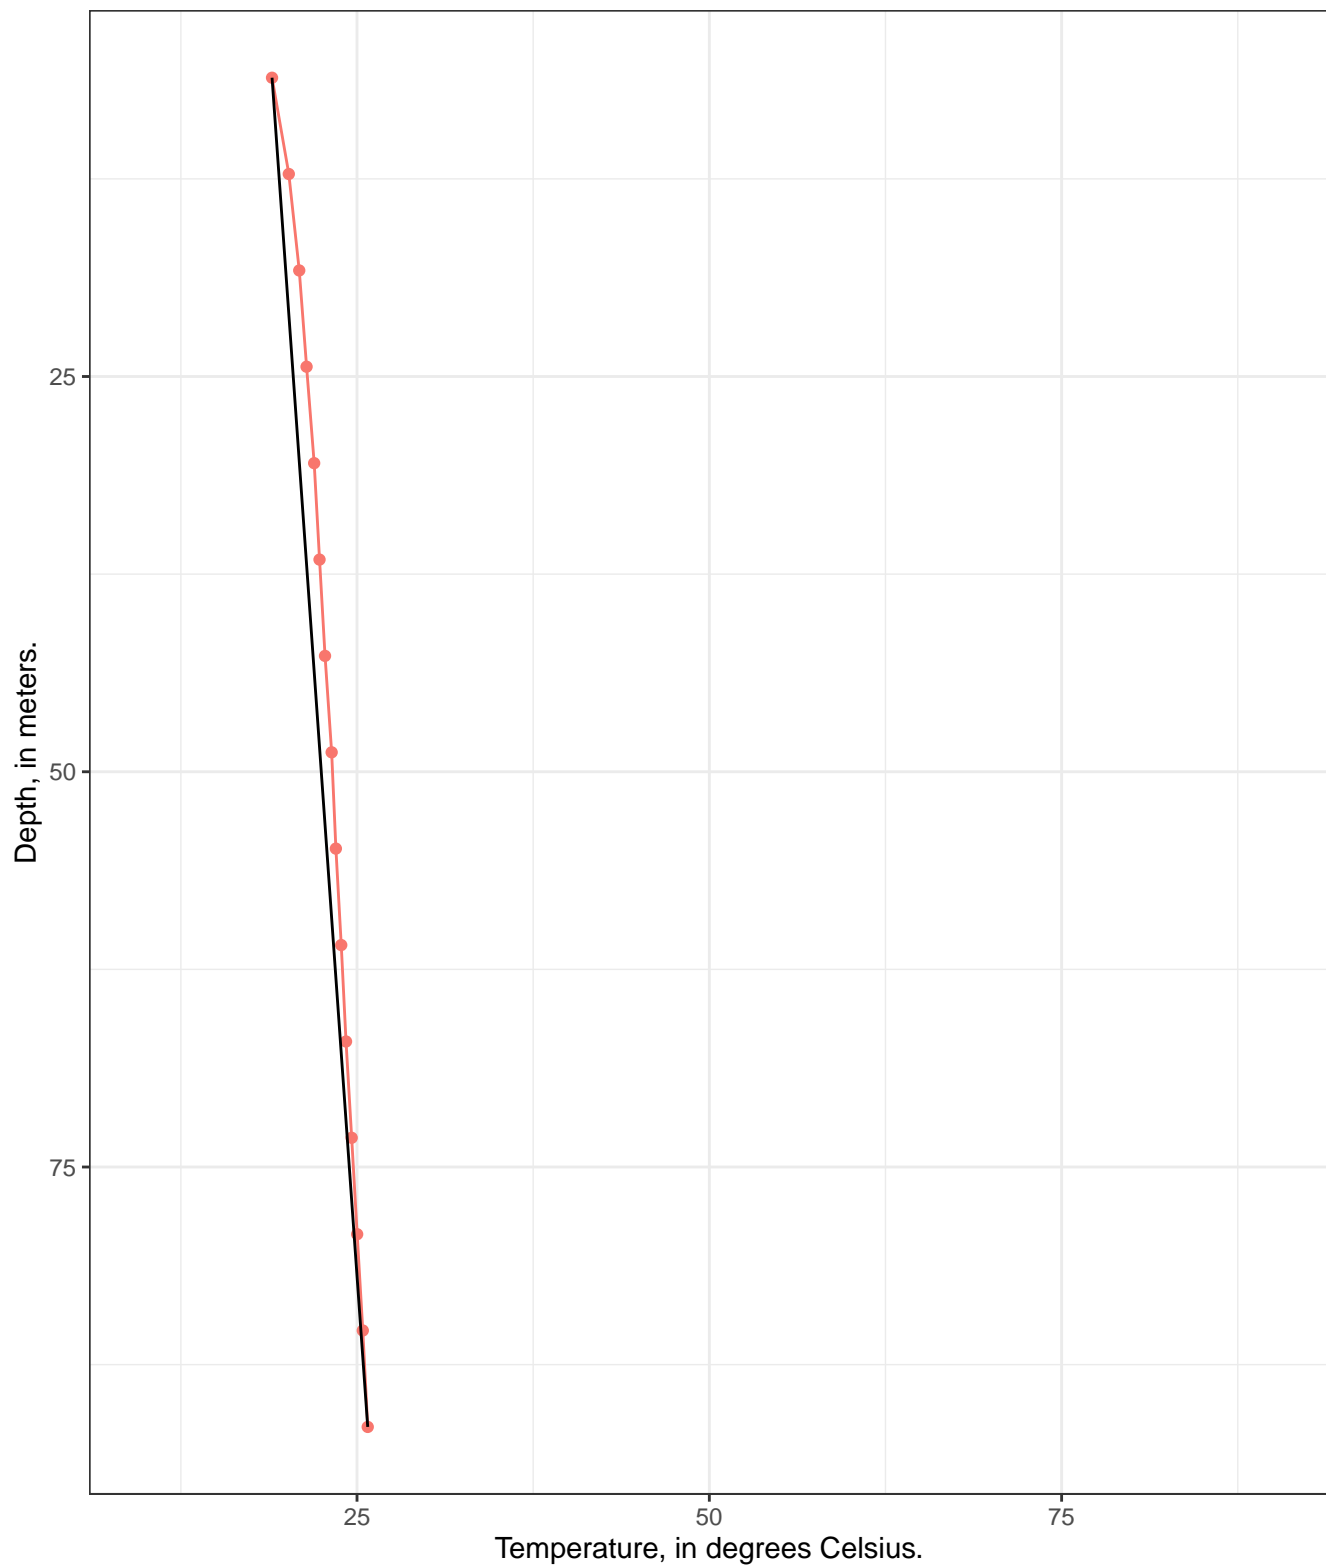

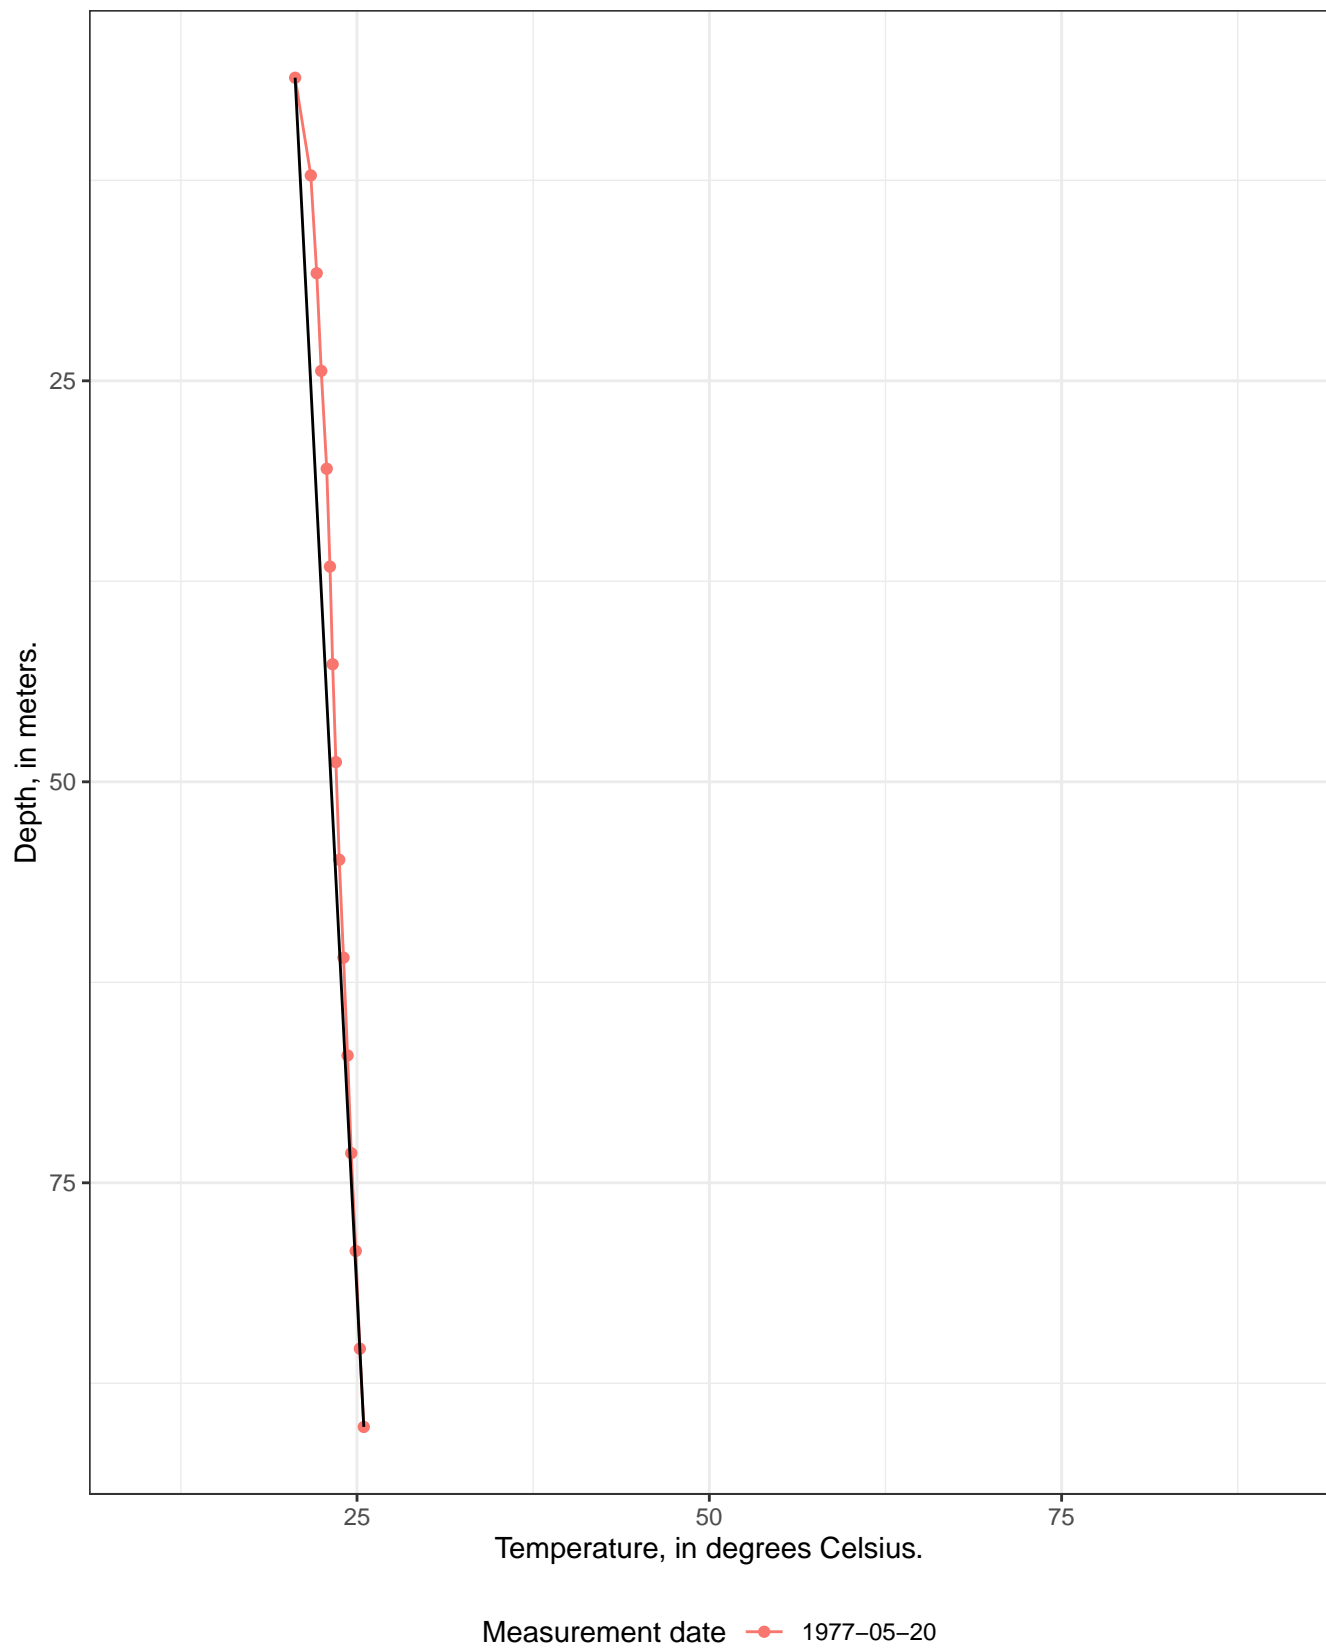

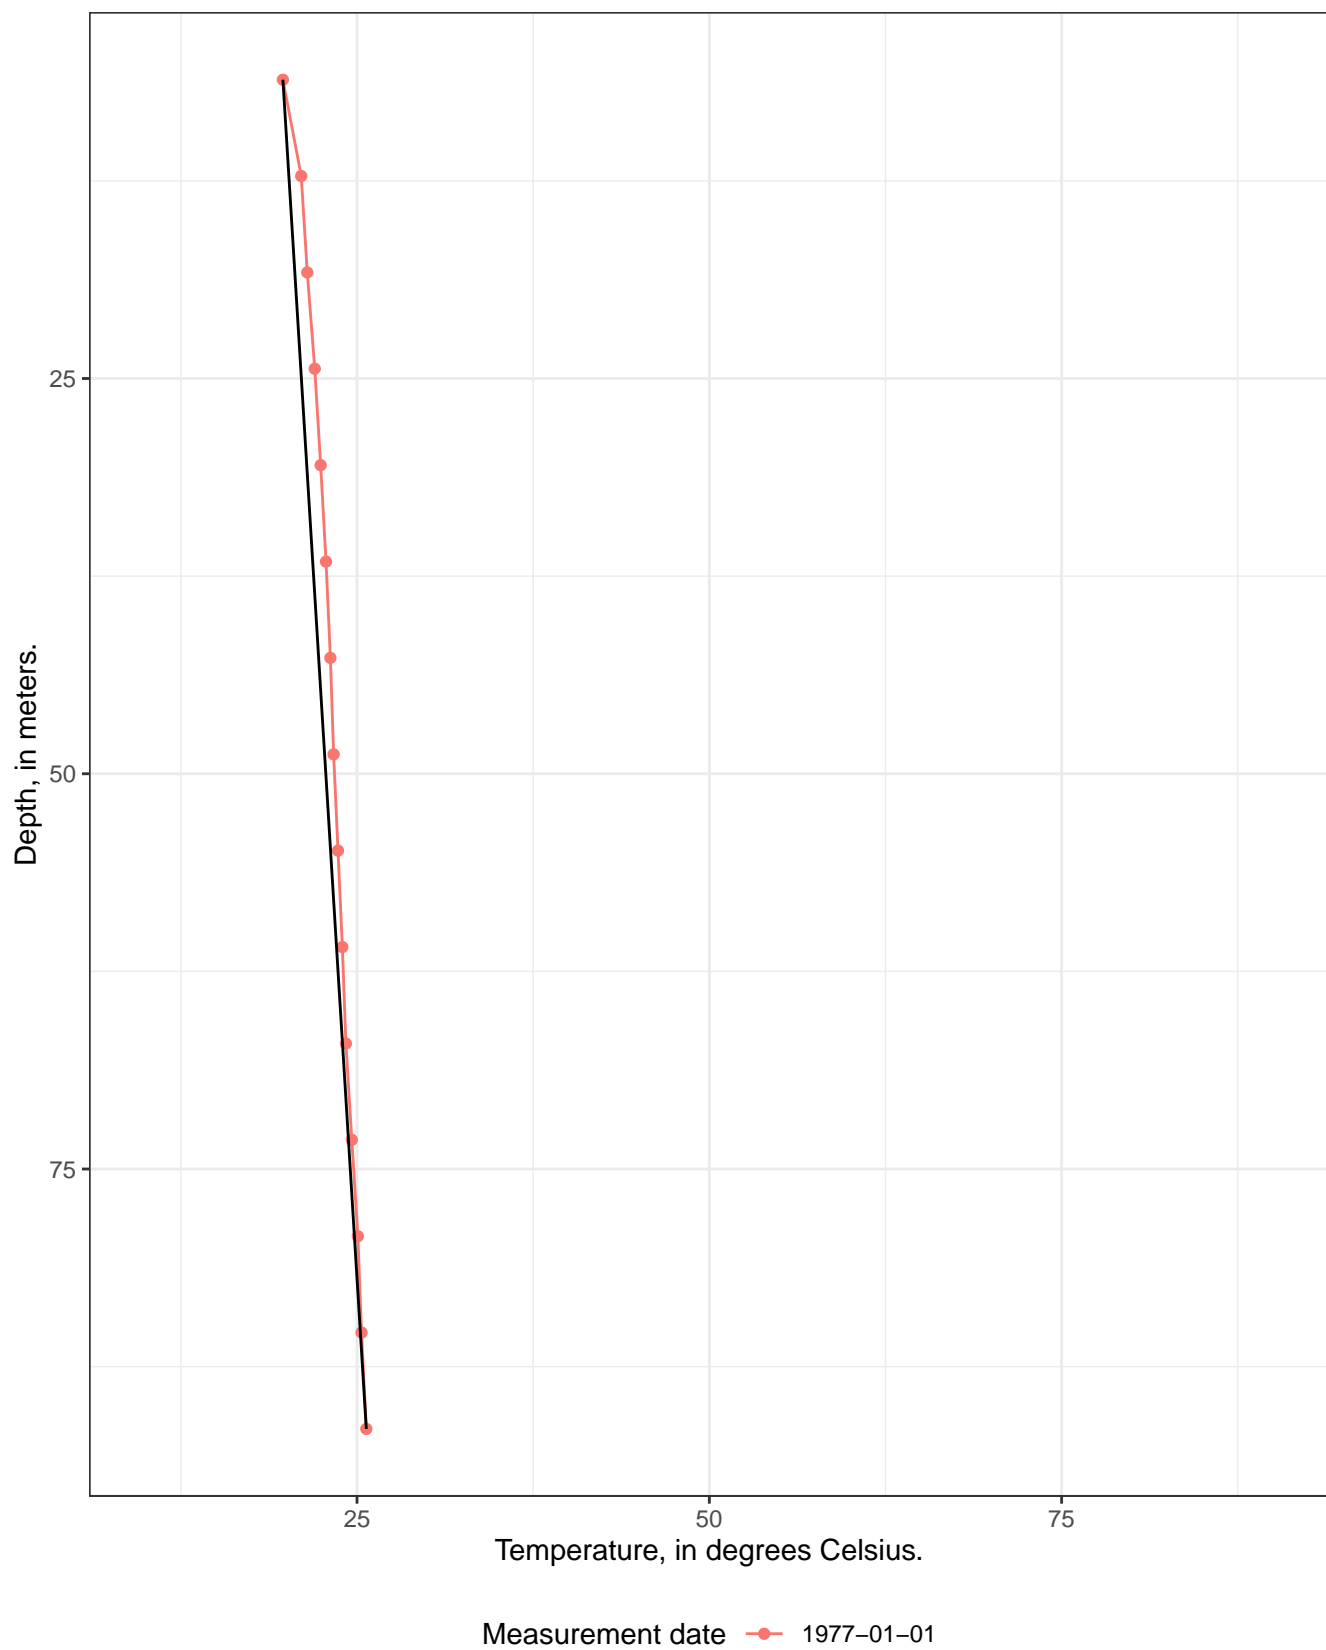

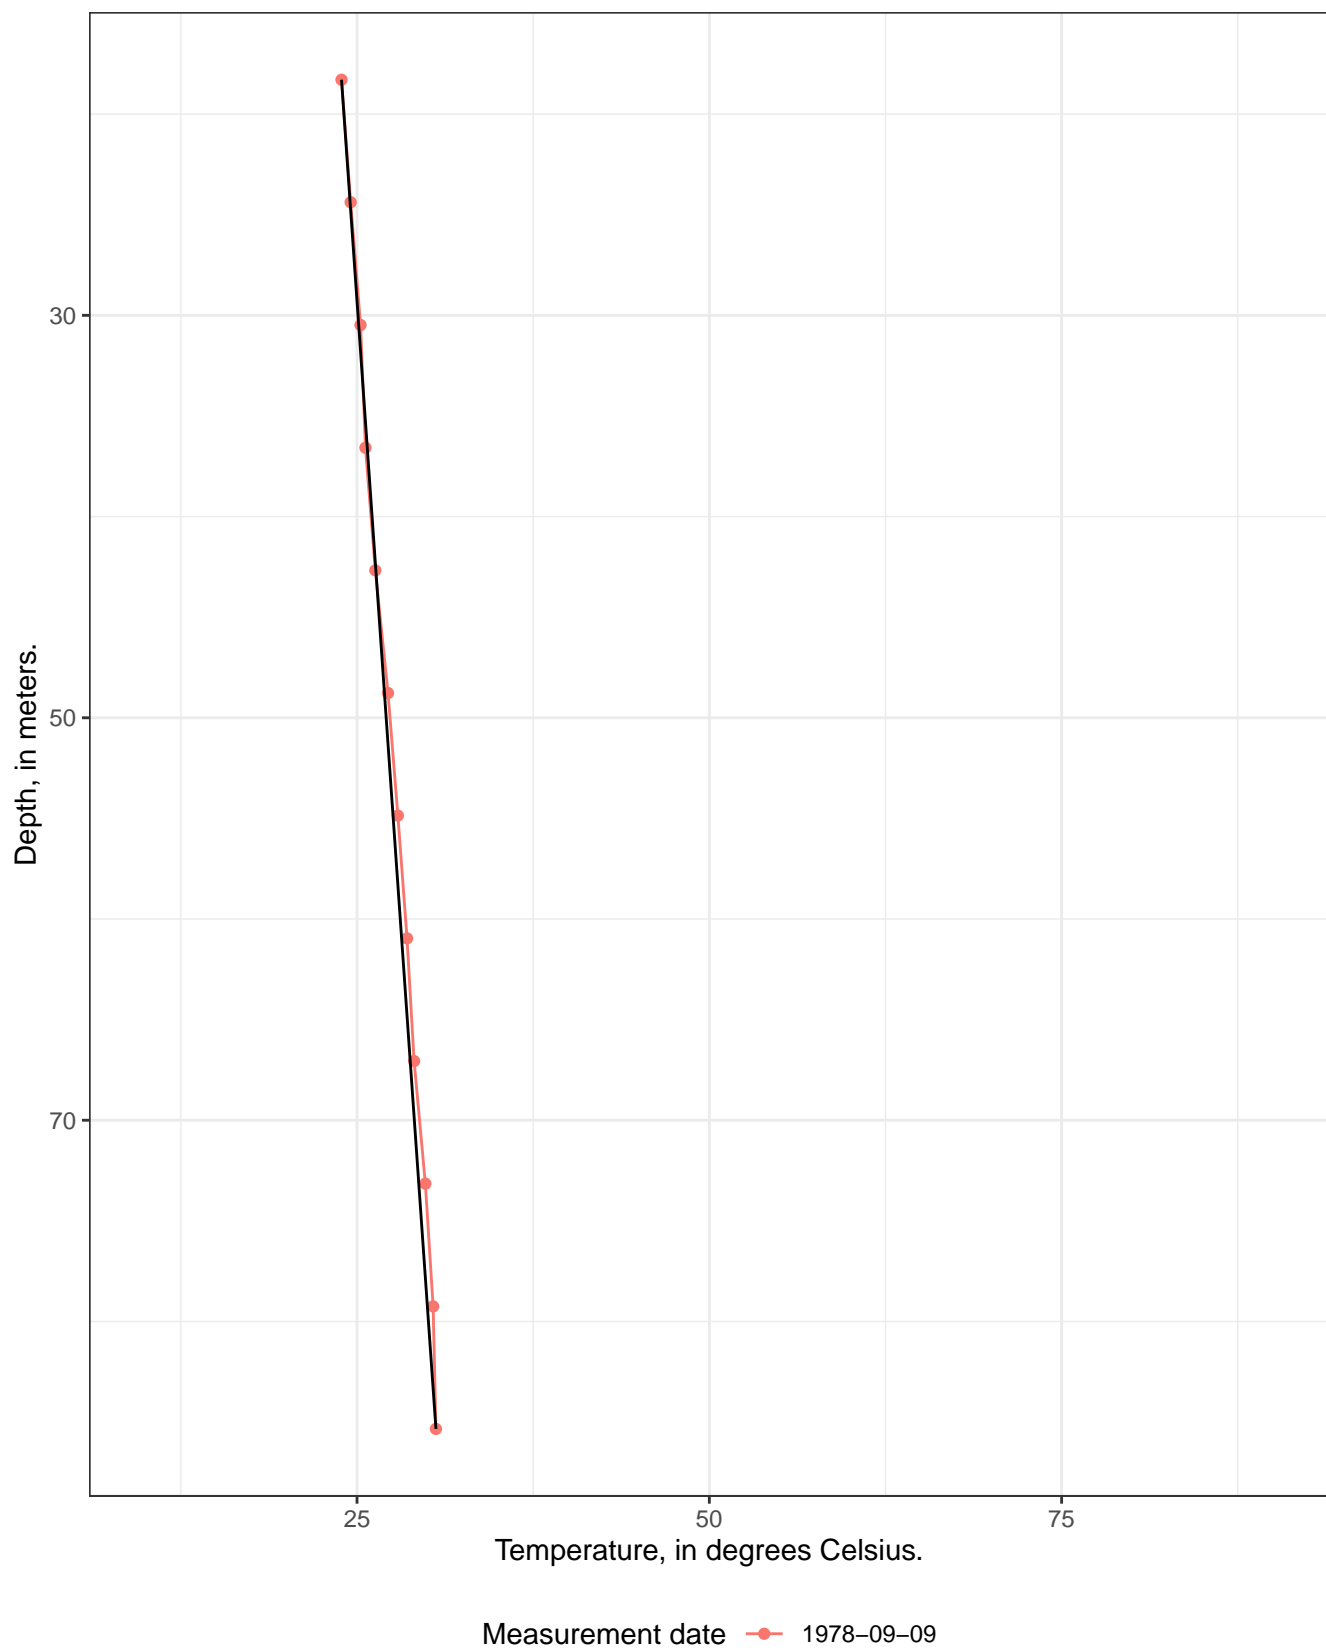



ID: 224 [Phillips\_RS-11]

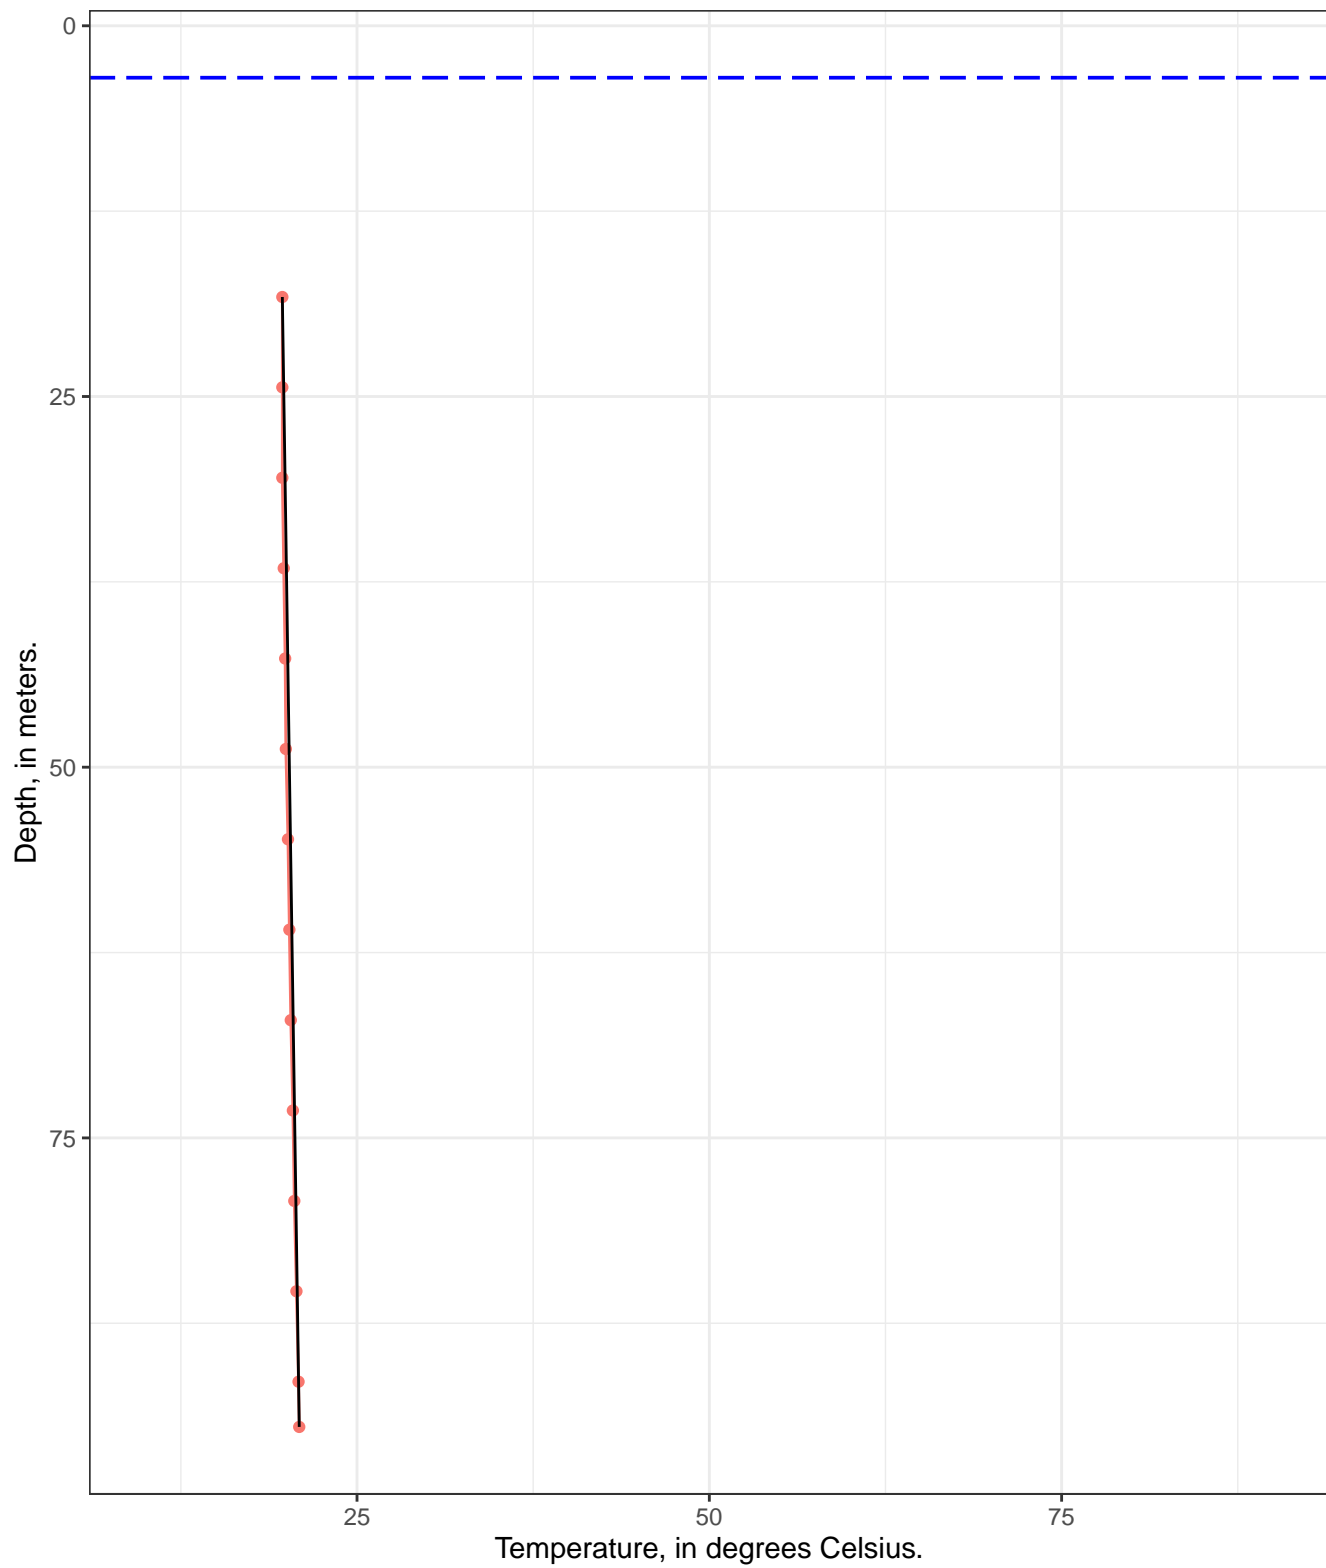

Measurement date 1978-09-07

ID: 225 [Phillips\_RS-12]

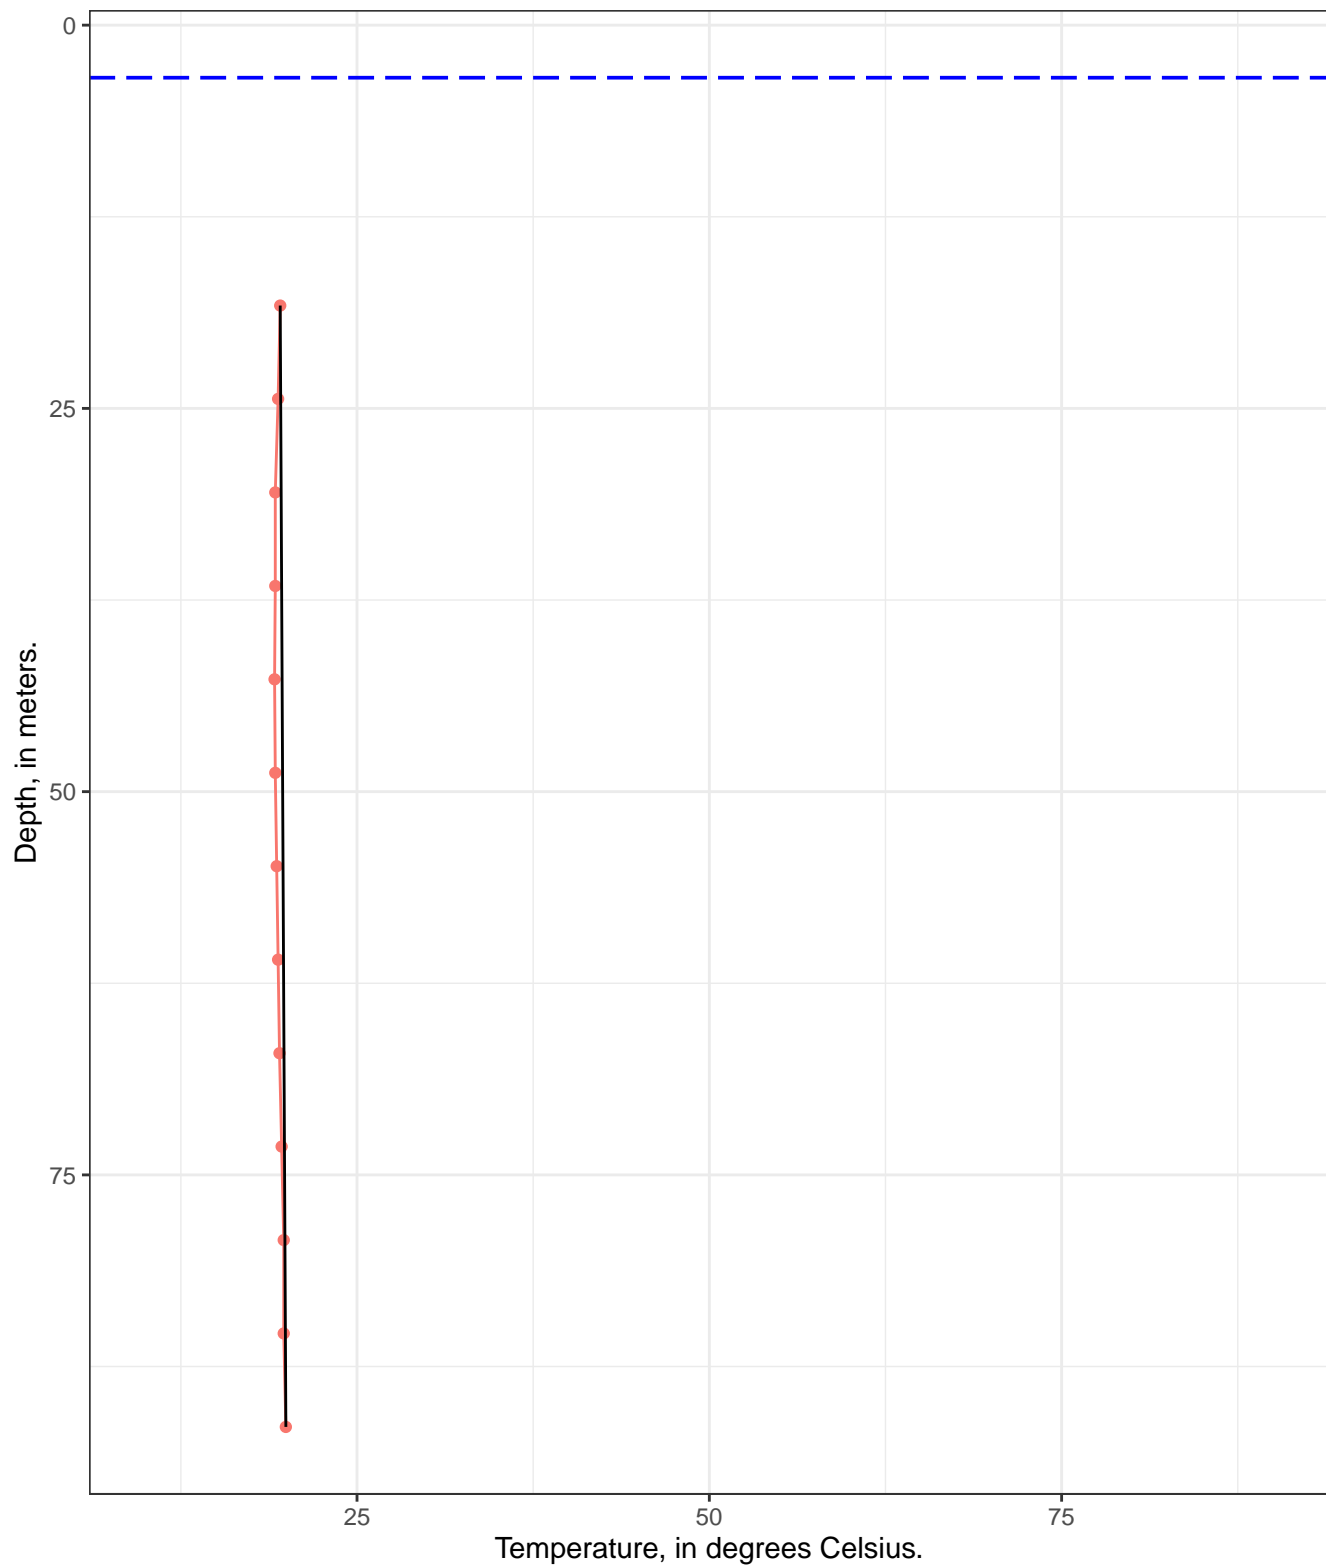

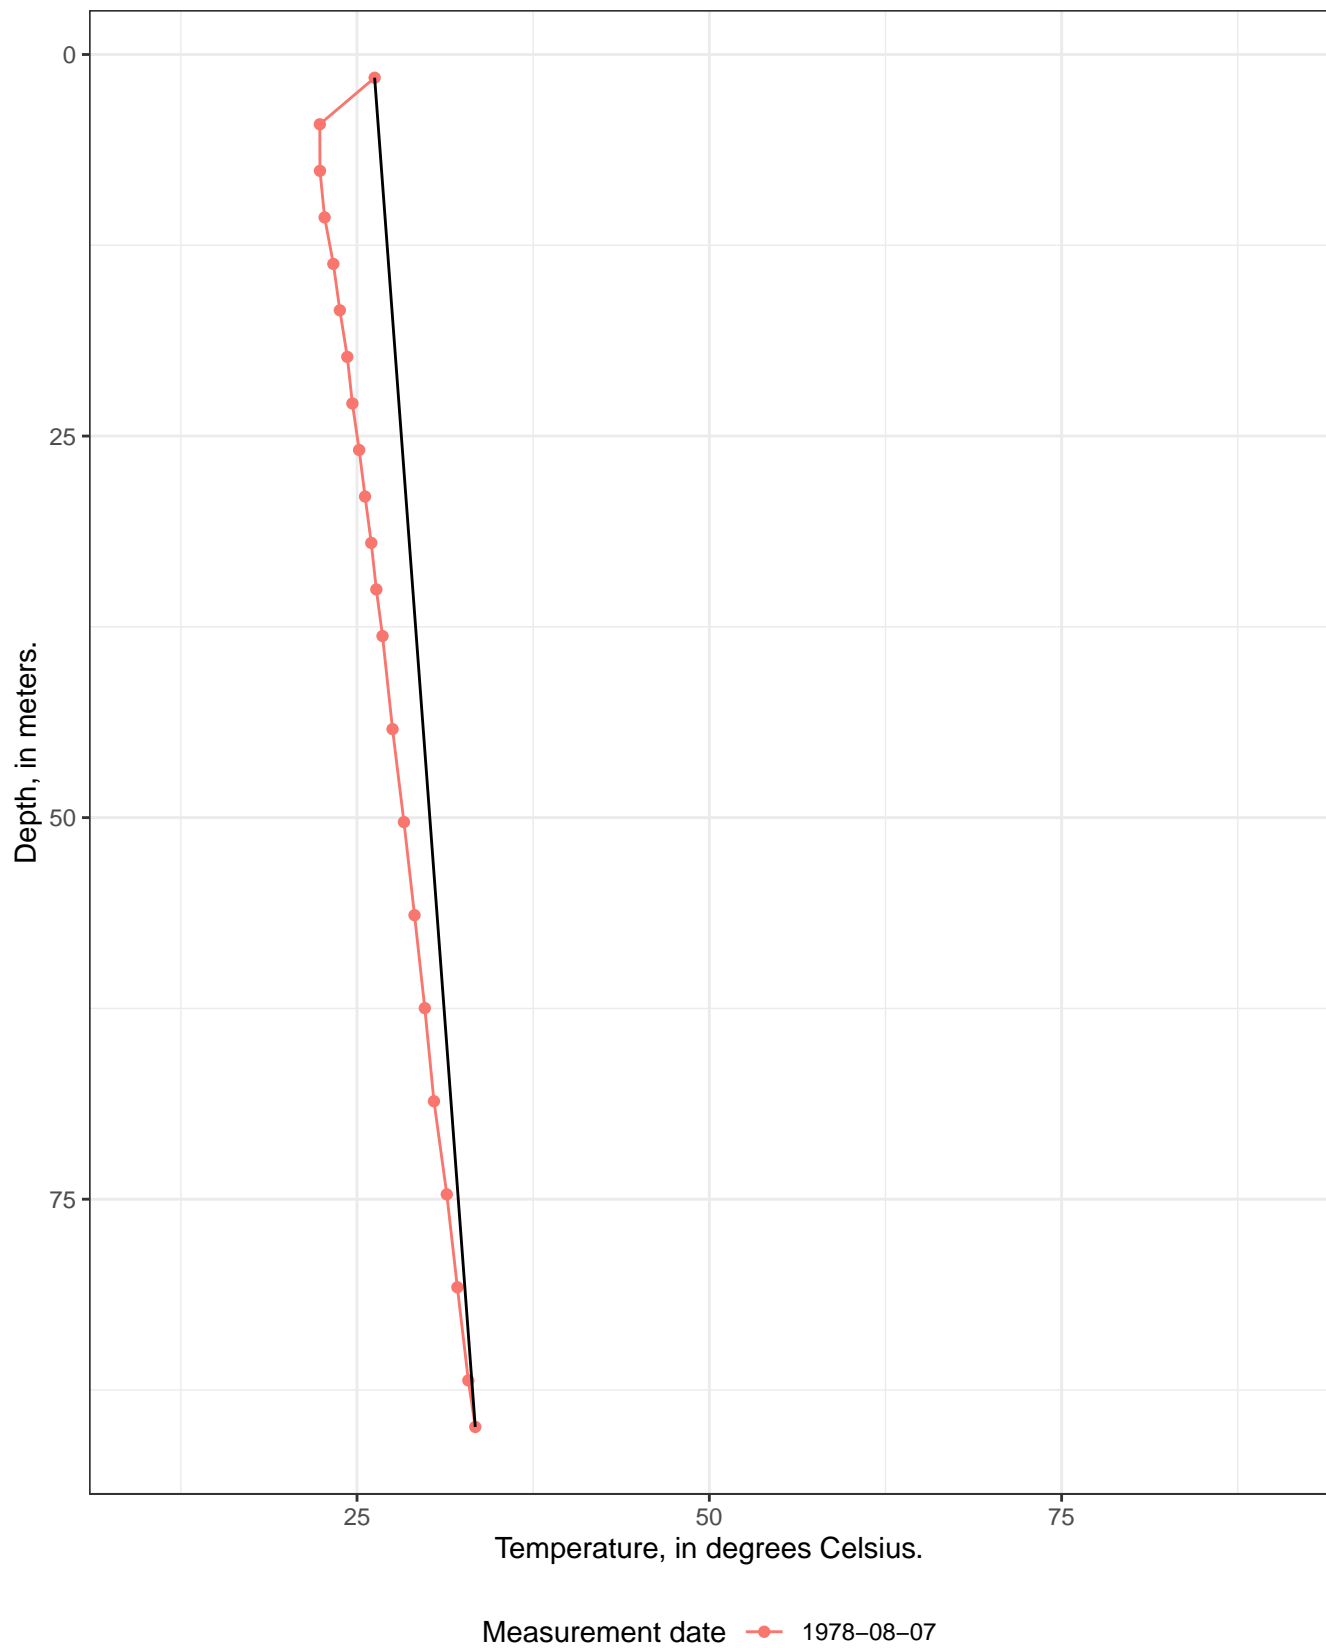

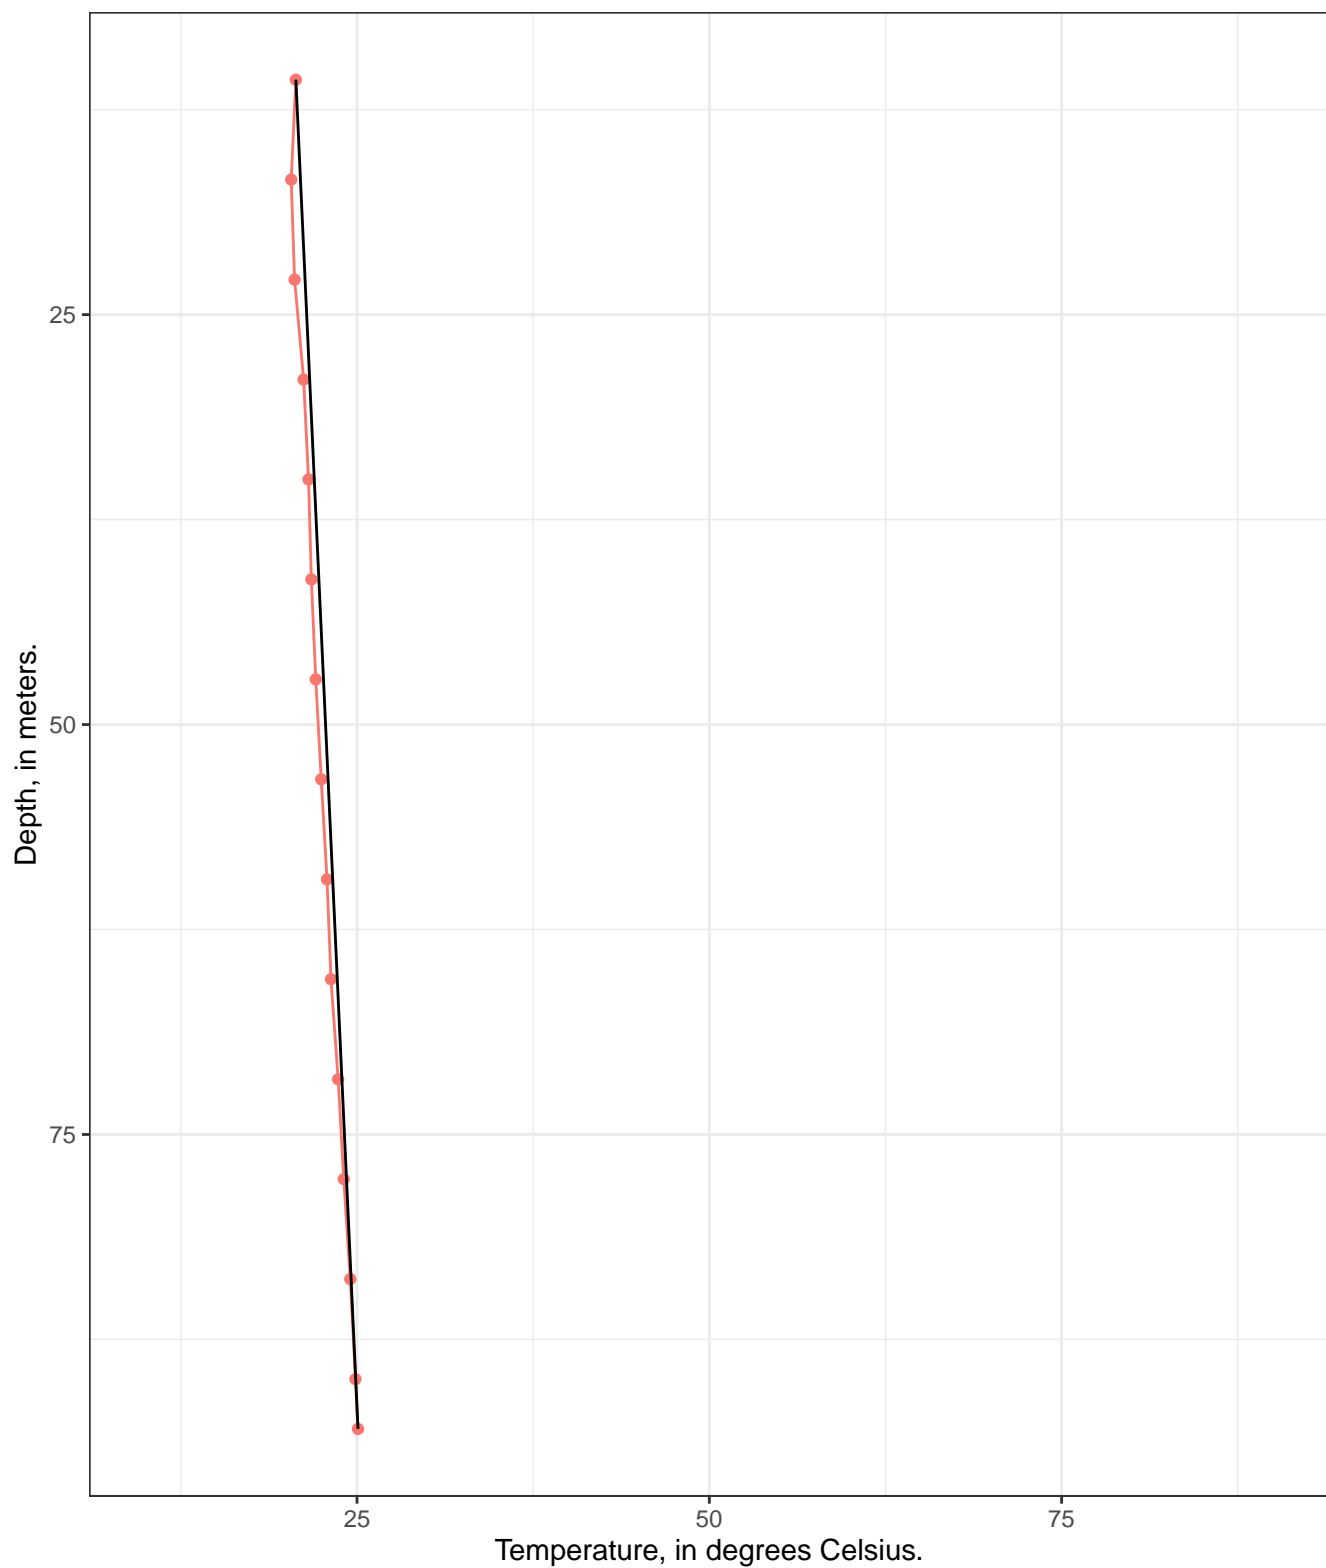

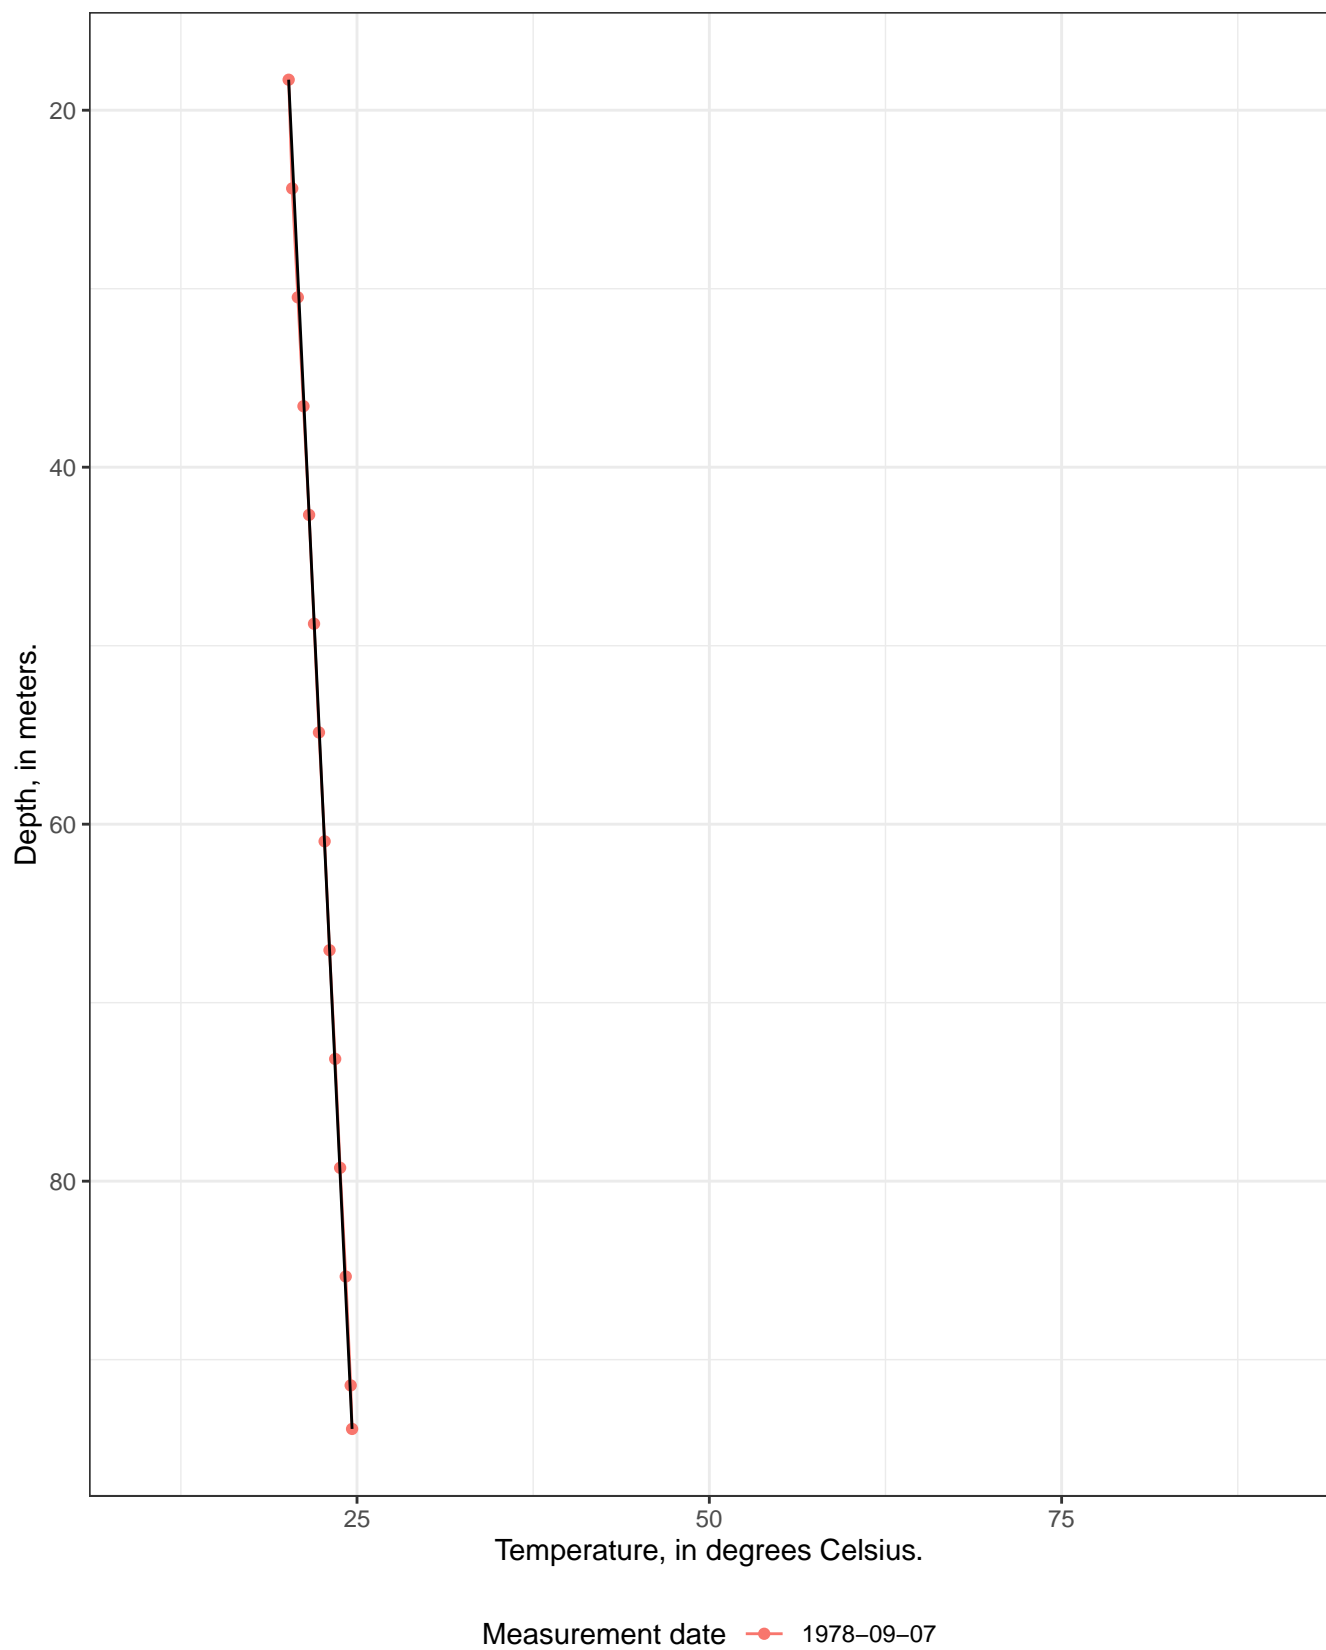

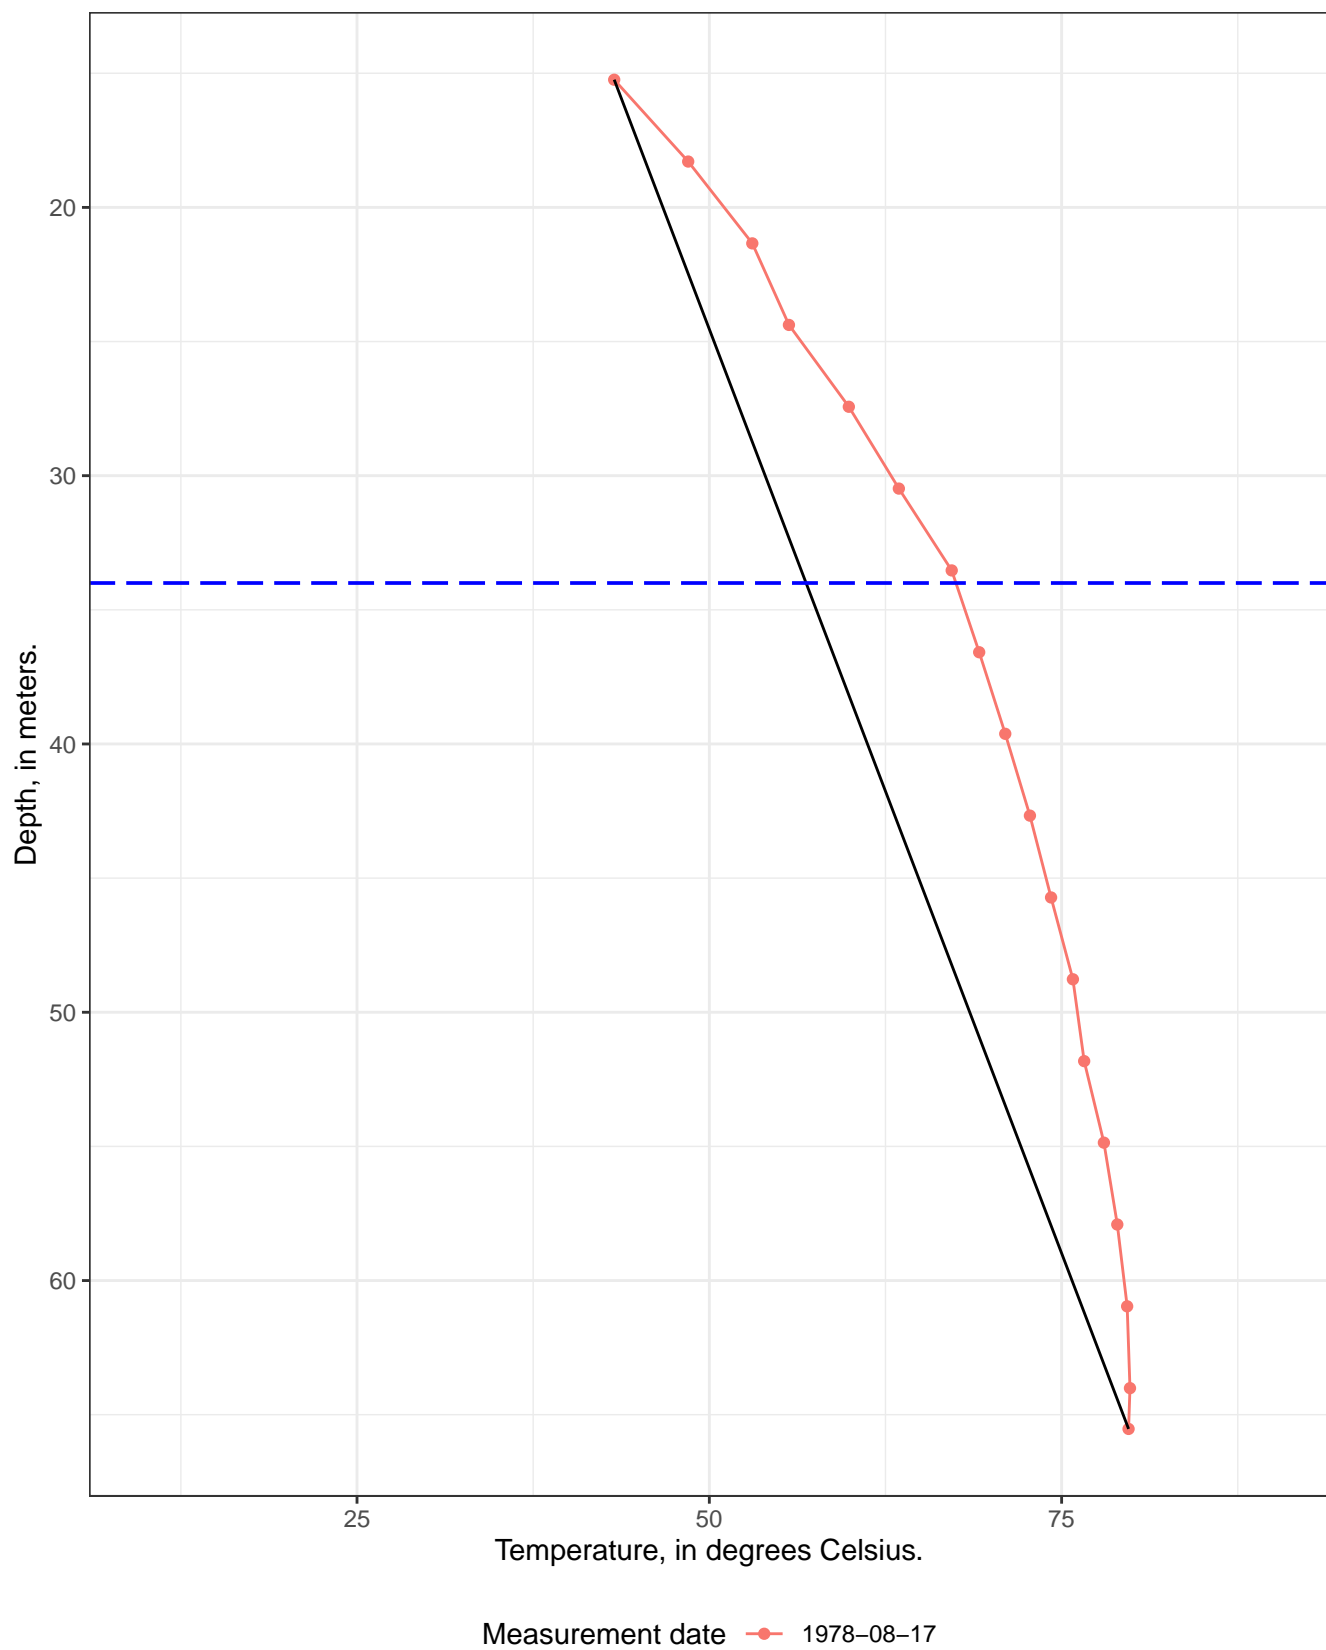

ID: 230 [Phillips\_T-1]

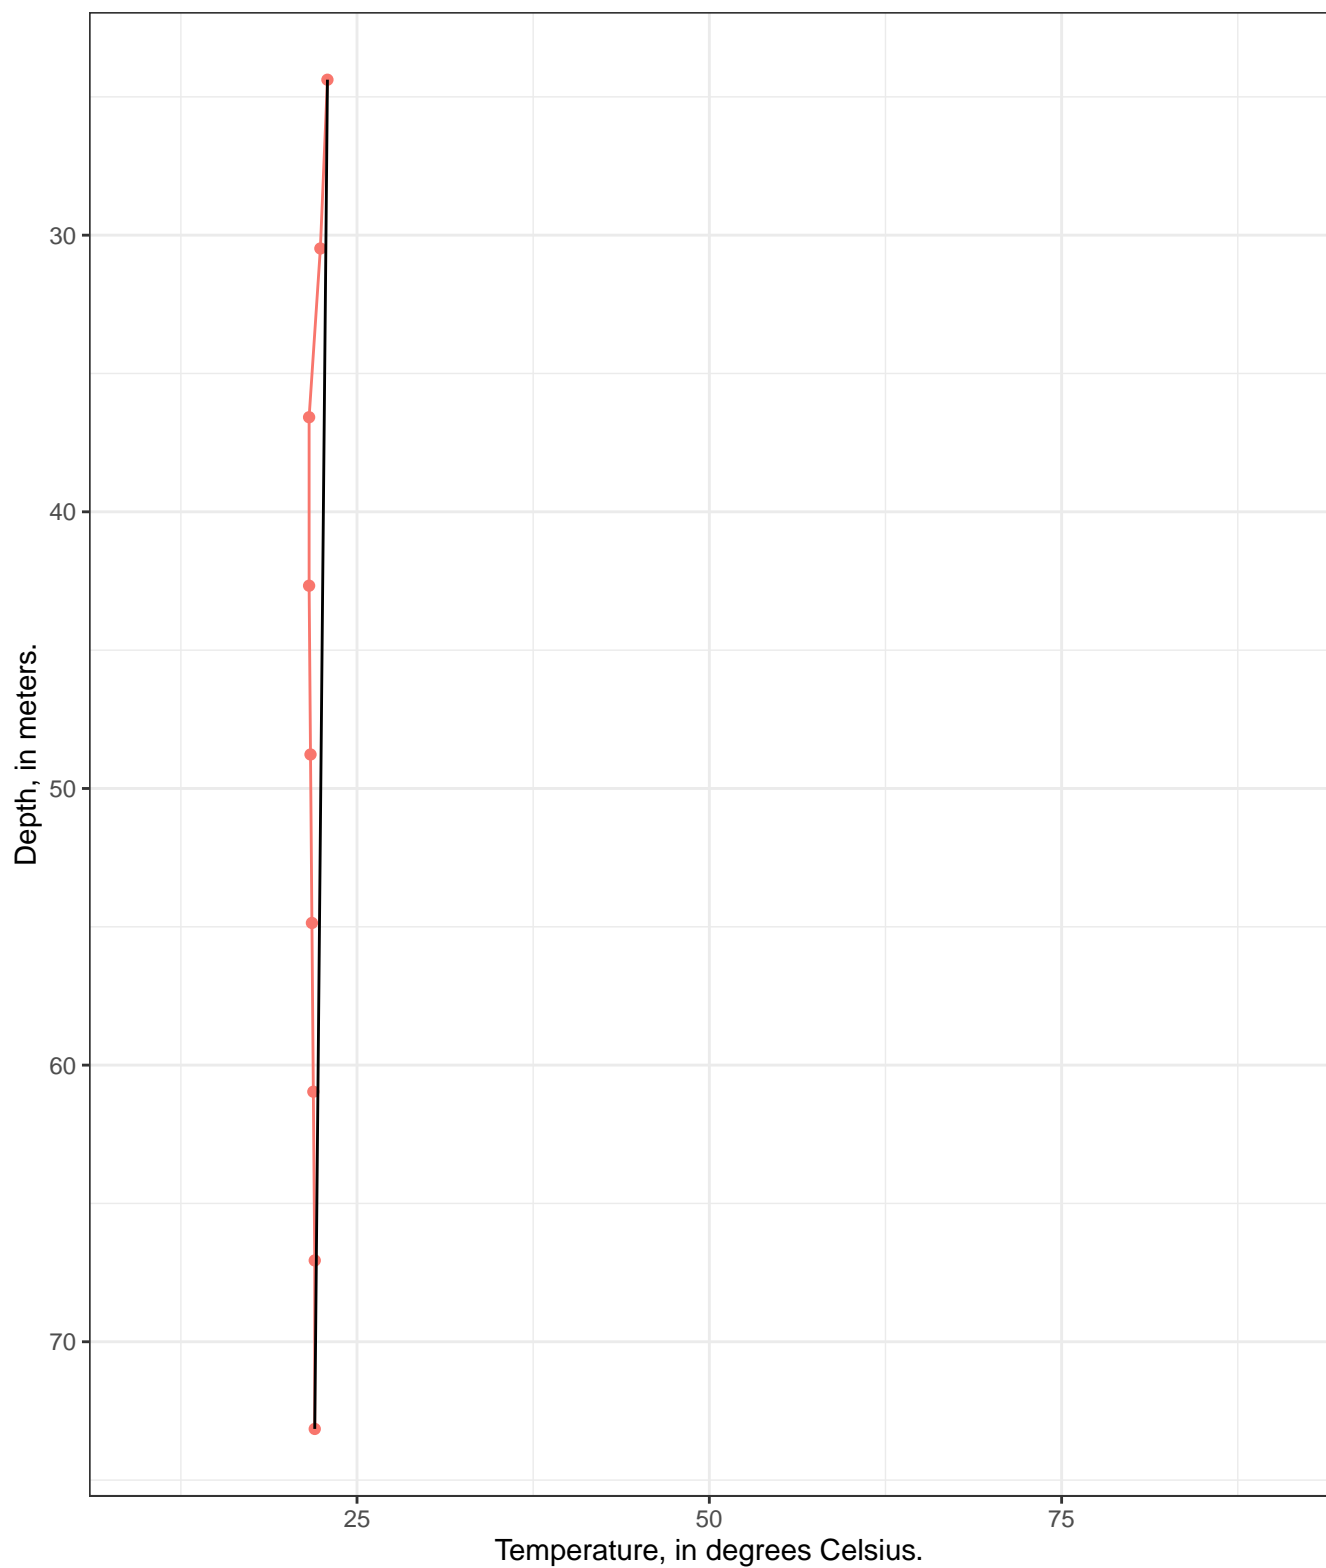

Measurement date 1980-01-06

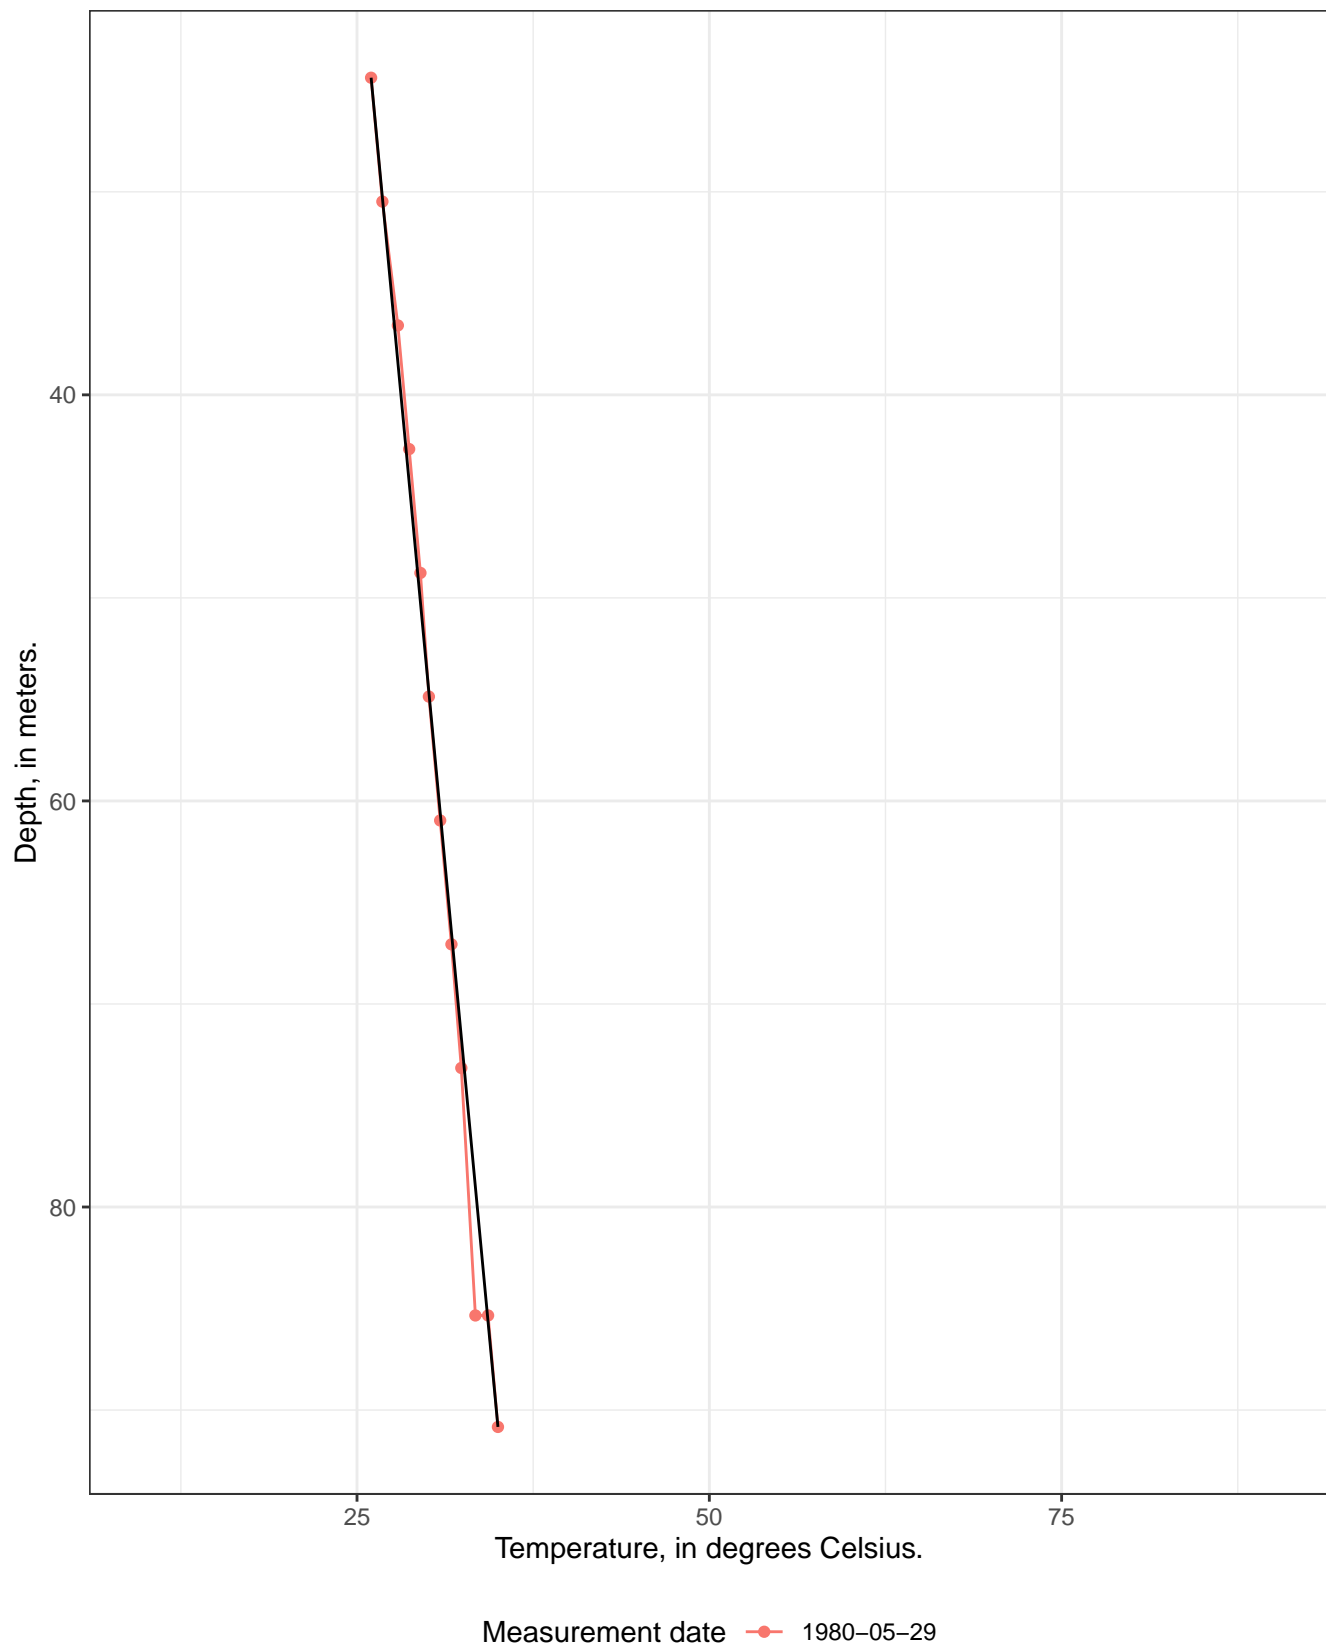



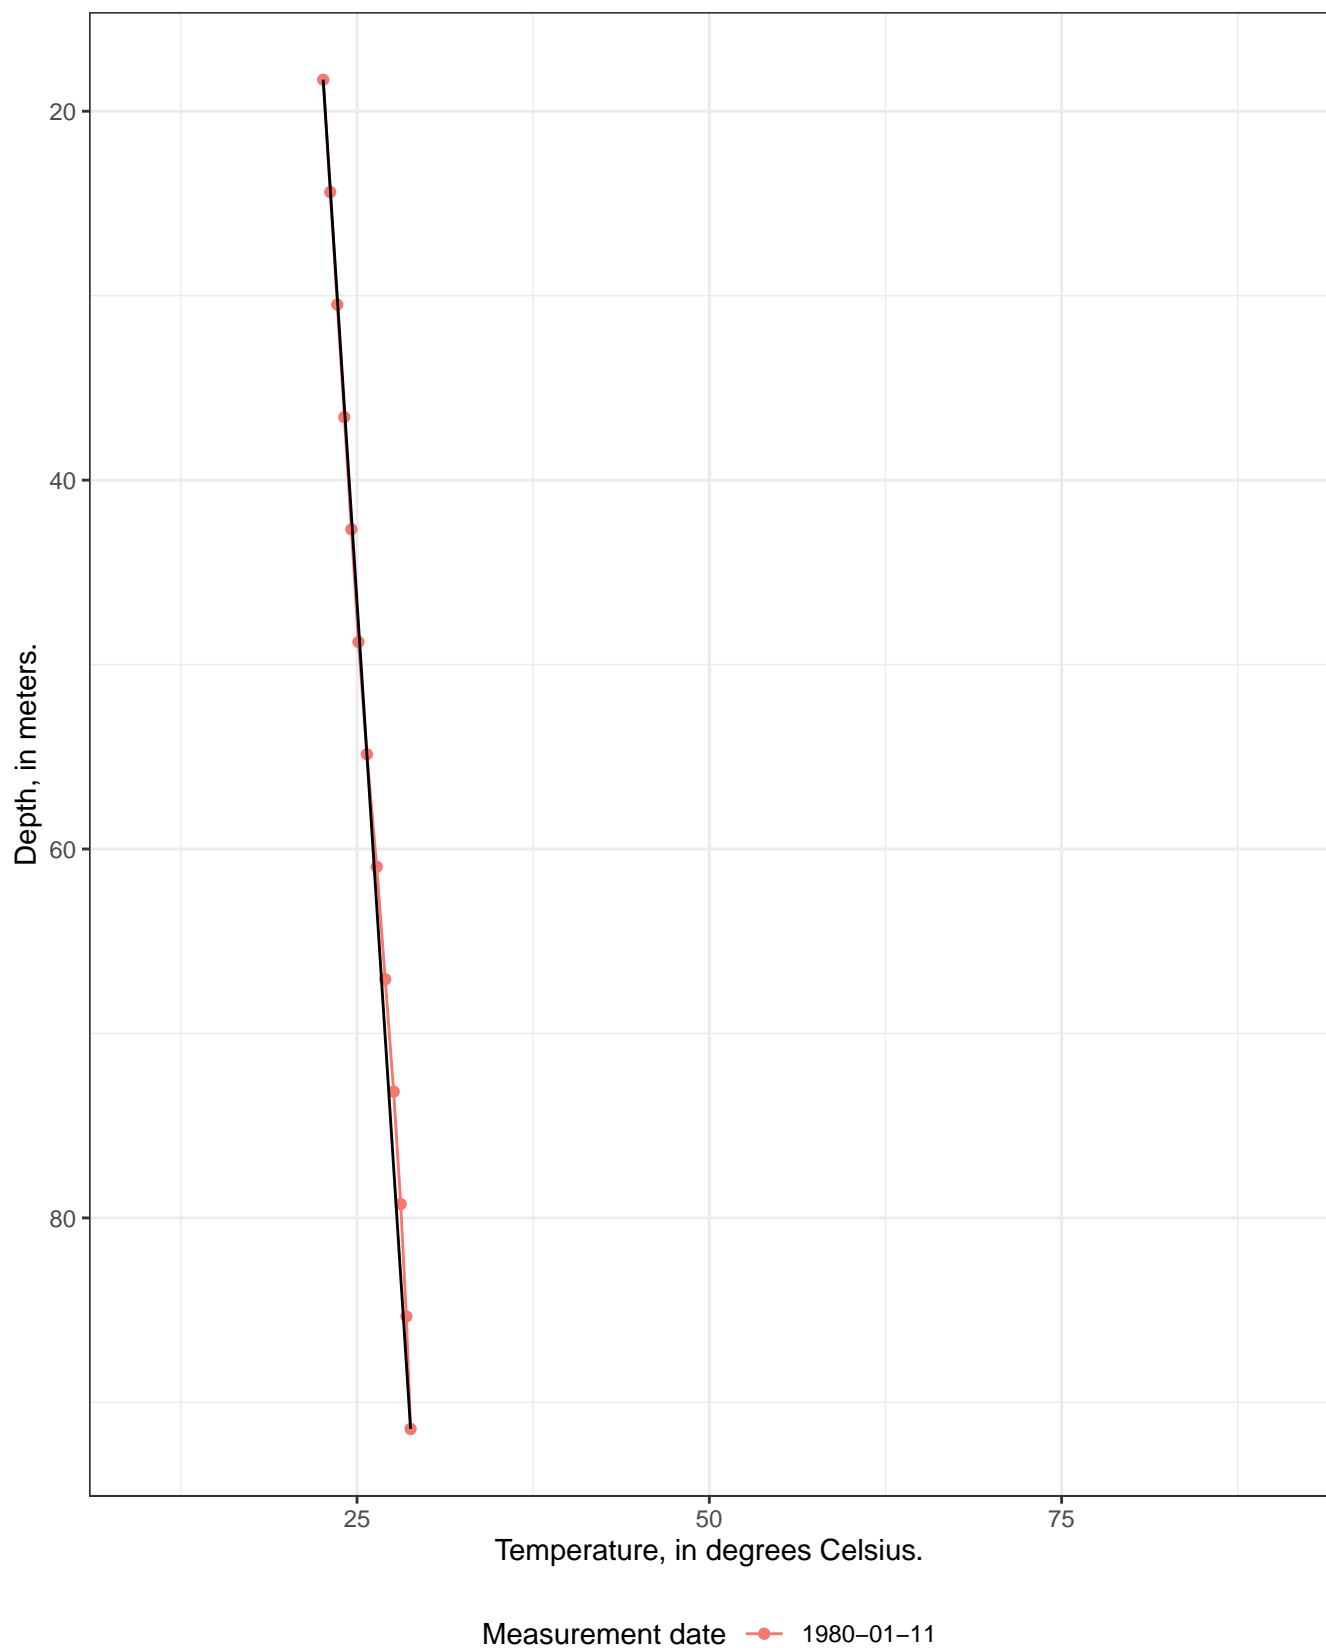

ID: 233 [Phillips\_T-12]

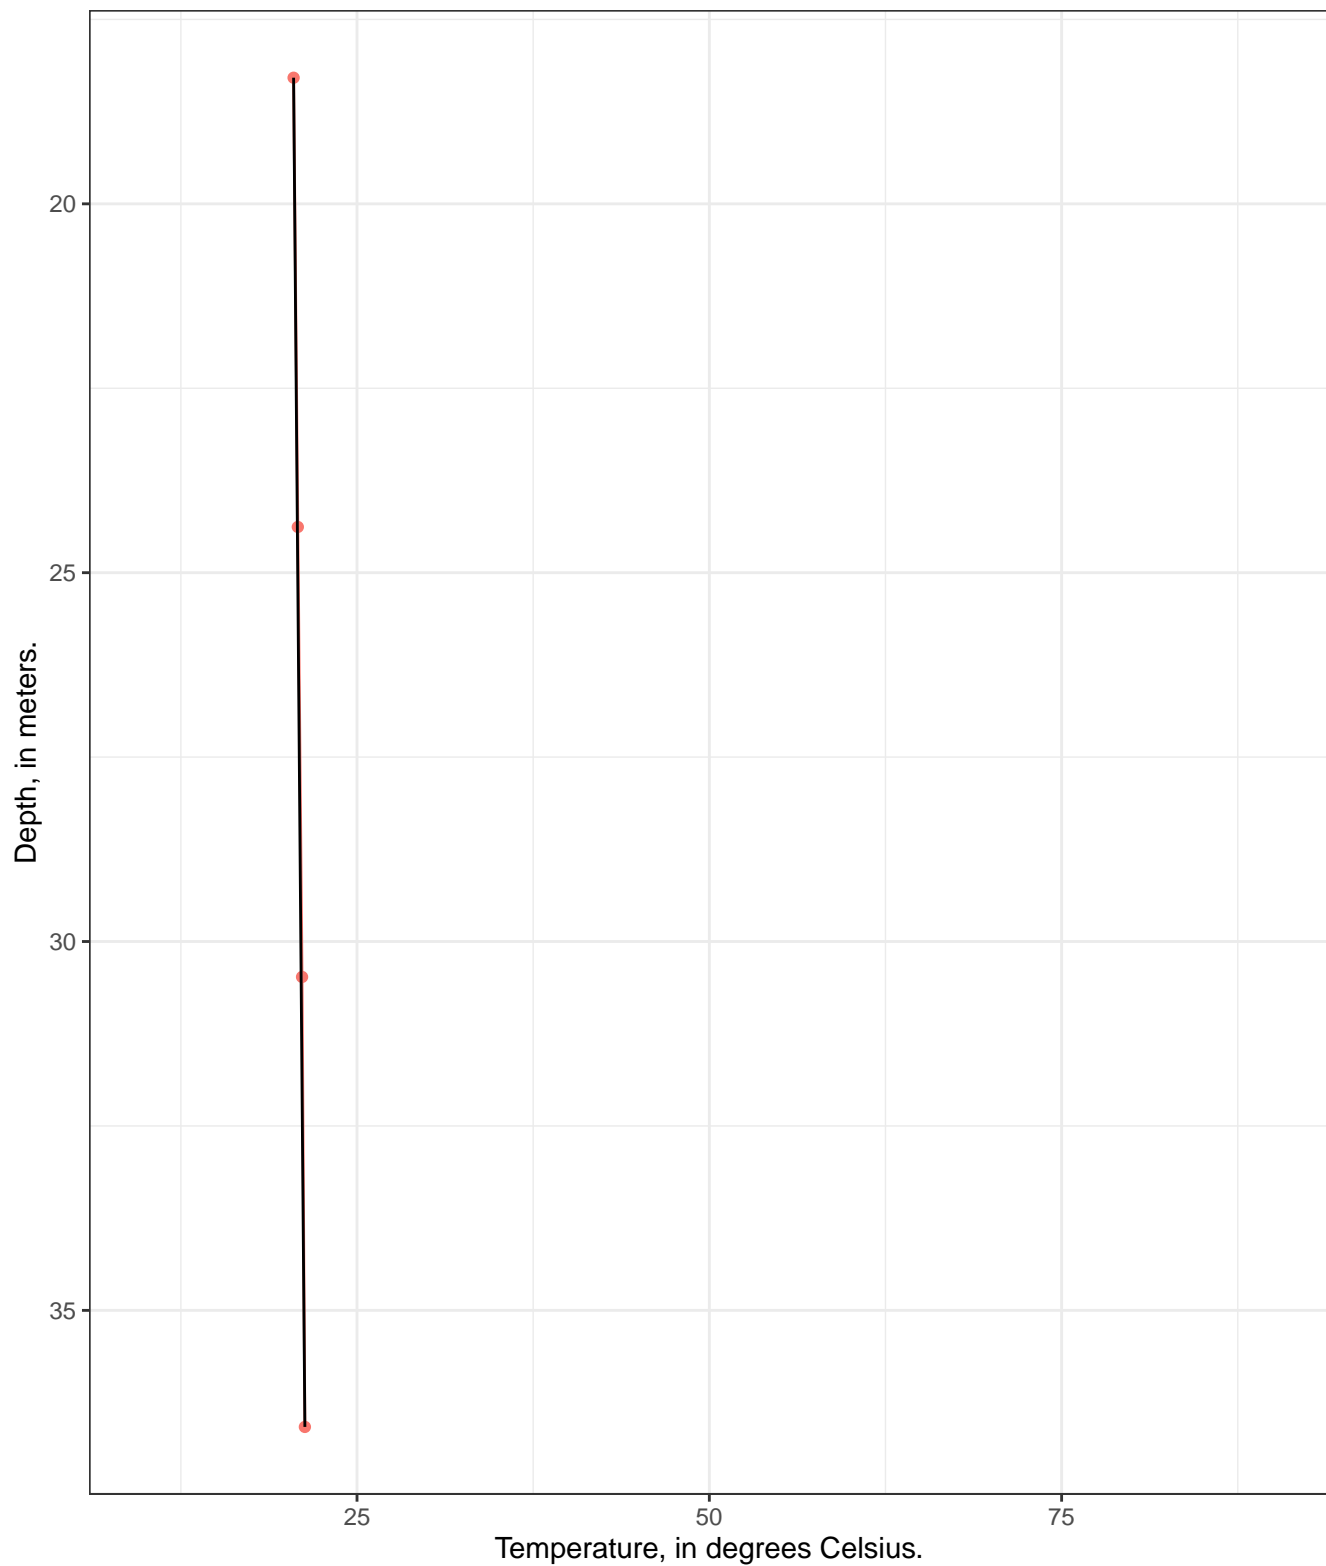

Measurement date 1980-01-11

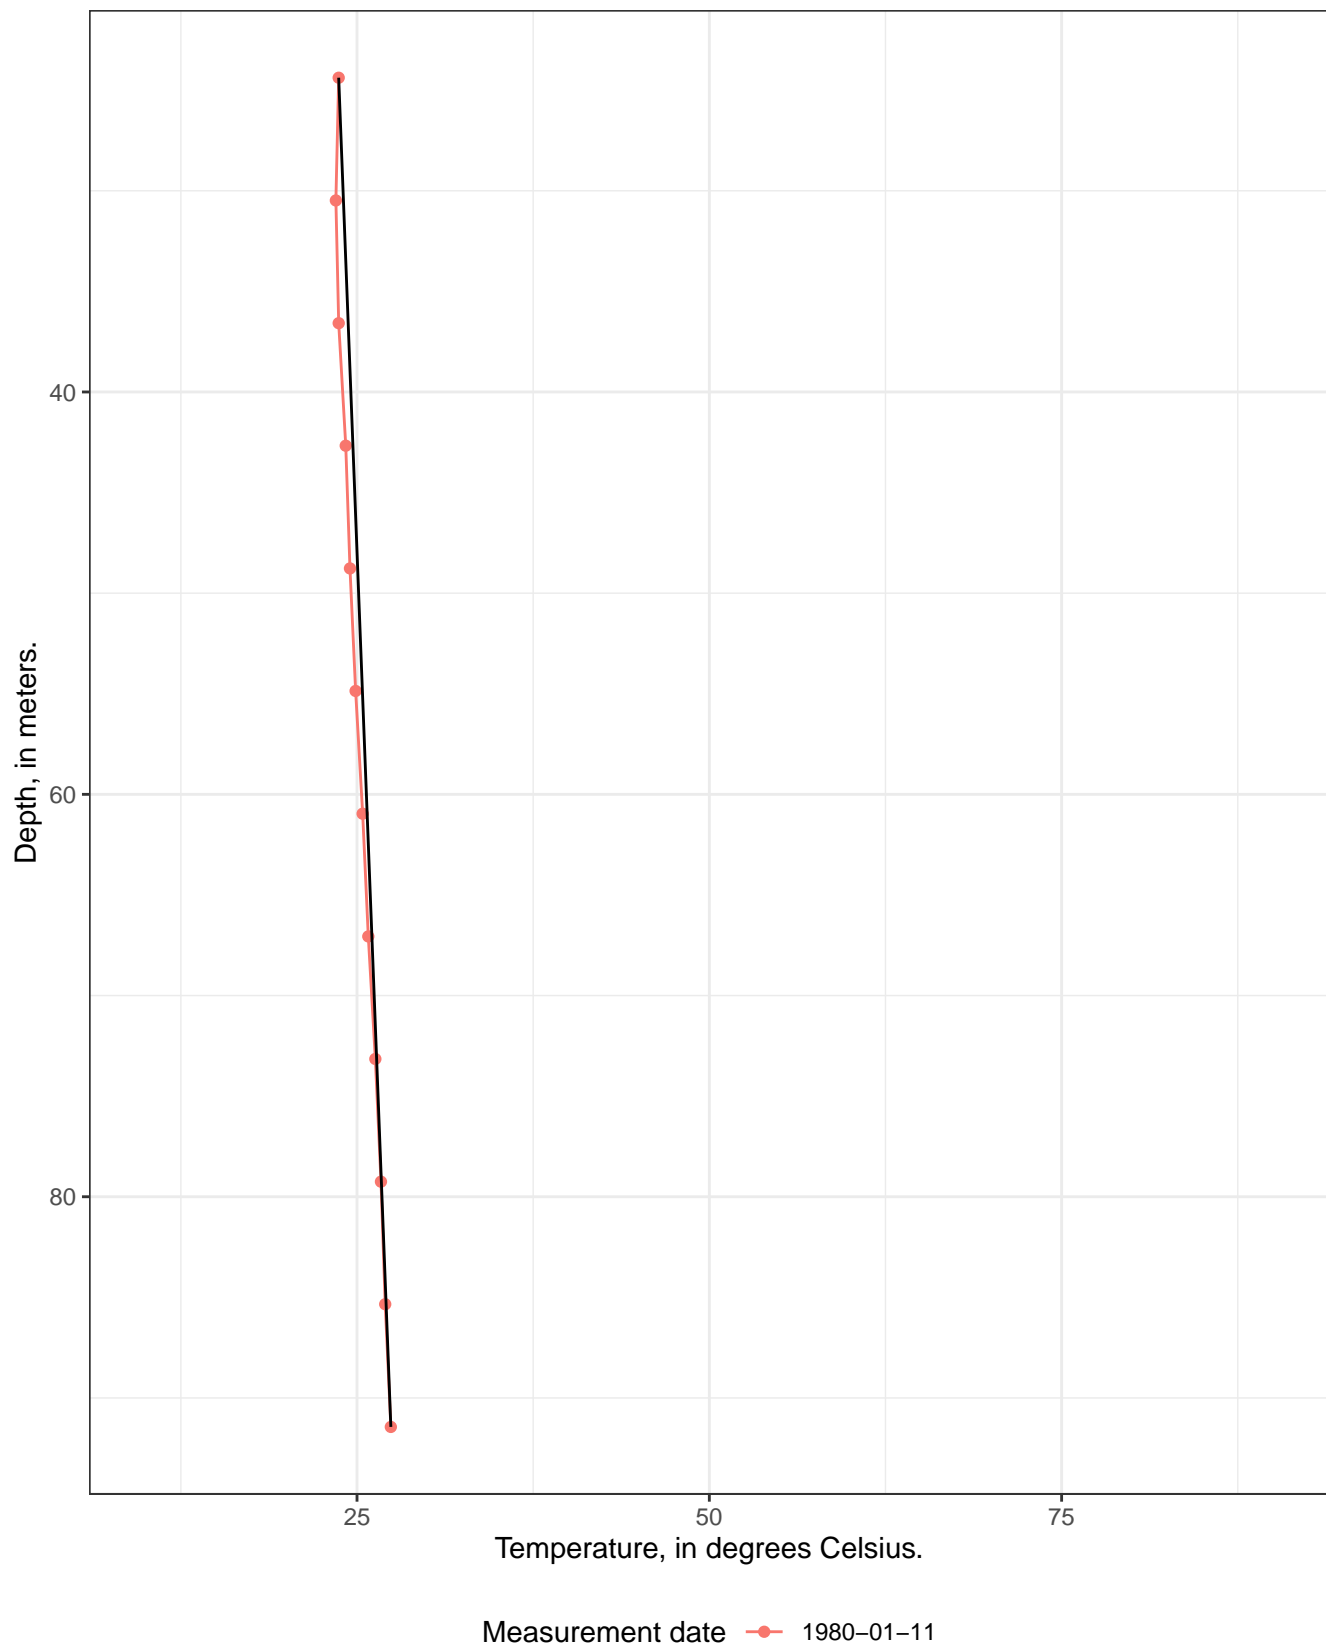

ID: 235 [Phillips\_T-2]

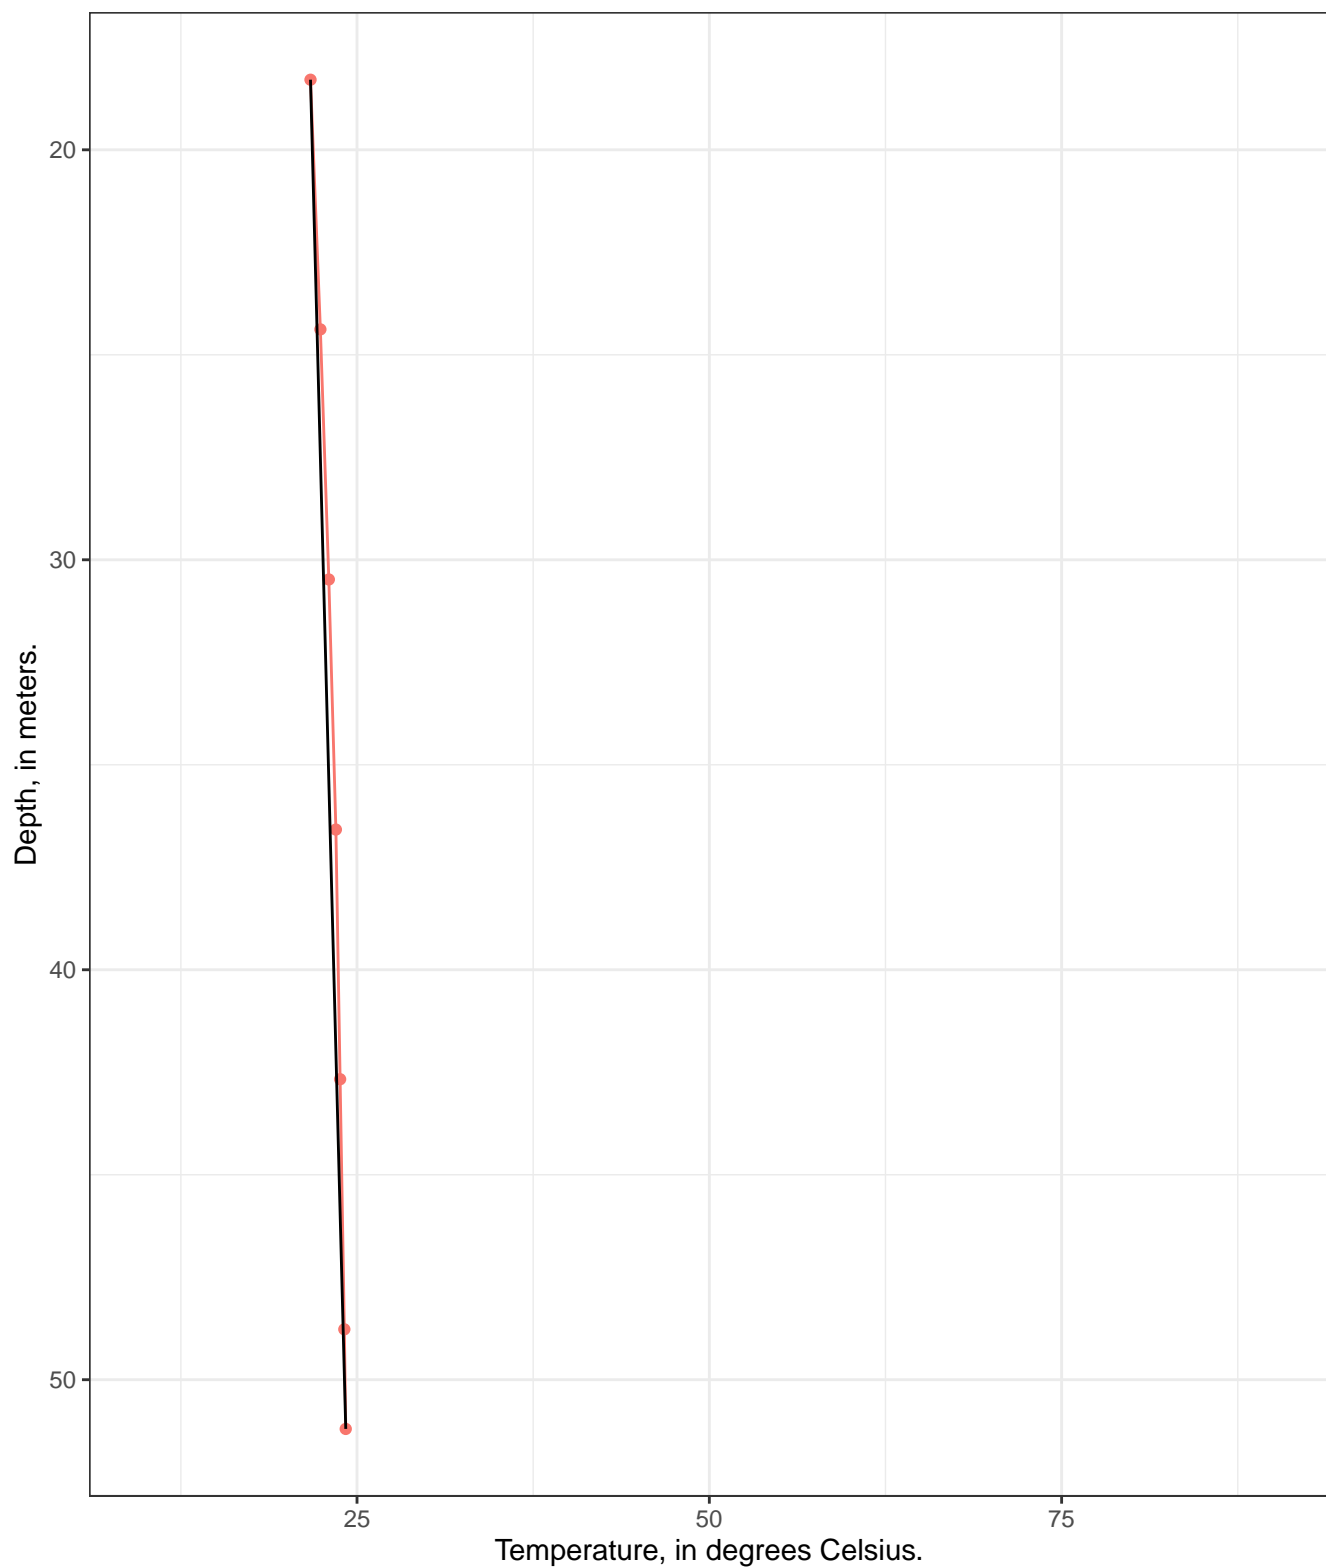

Measurement date 1980-01-06

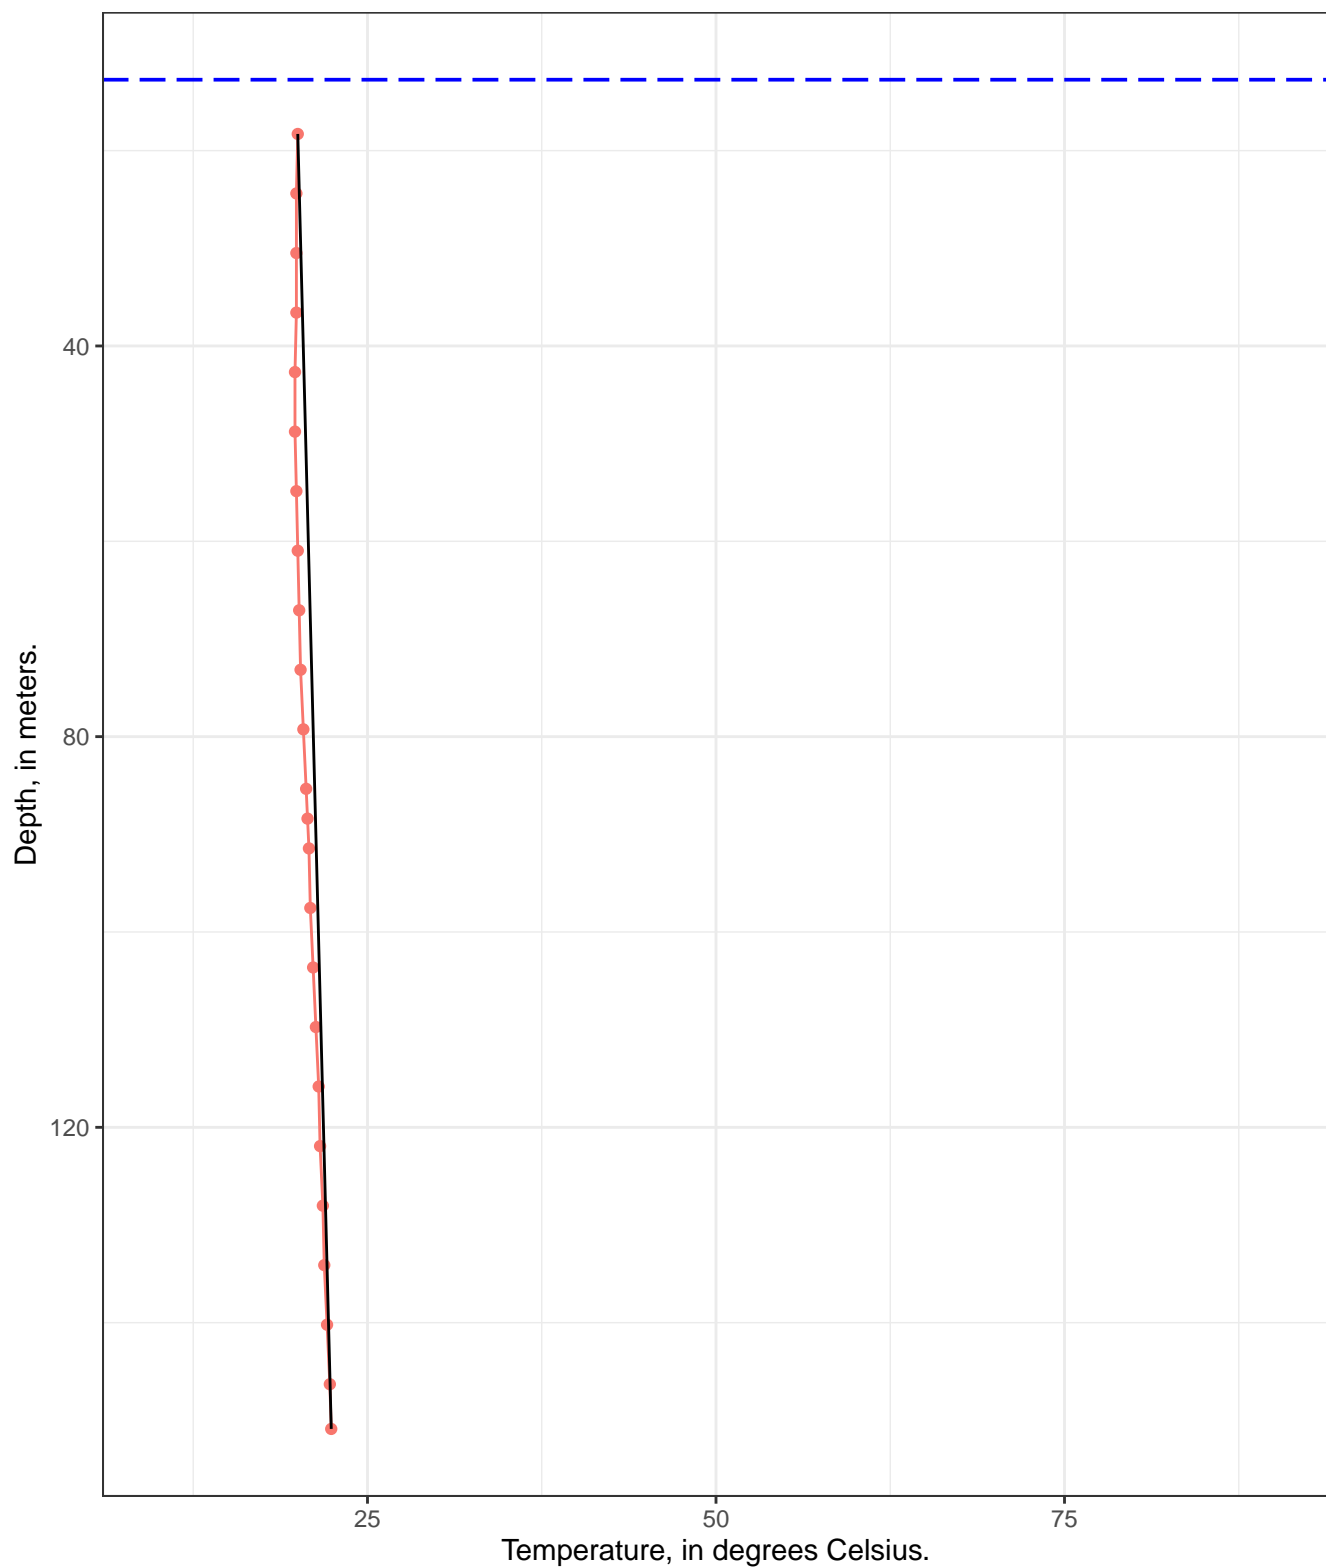

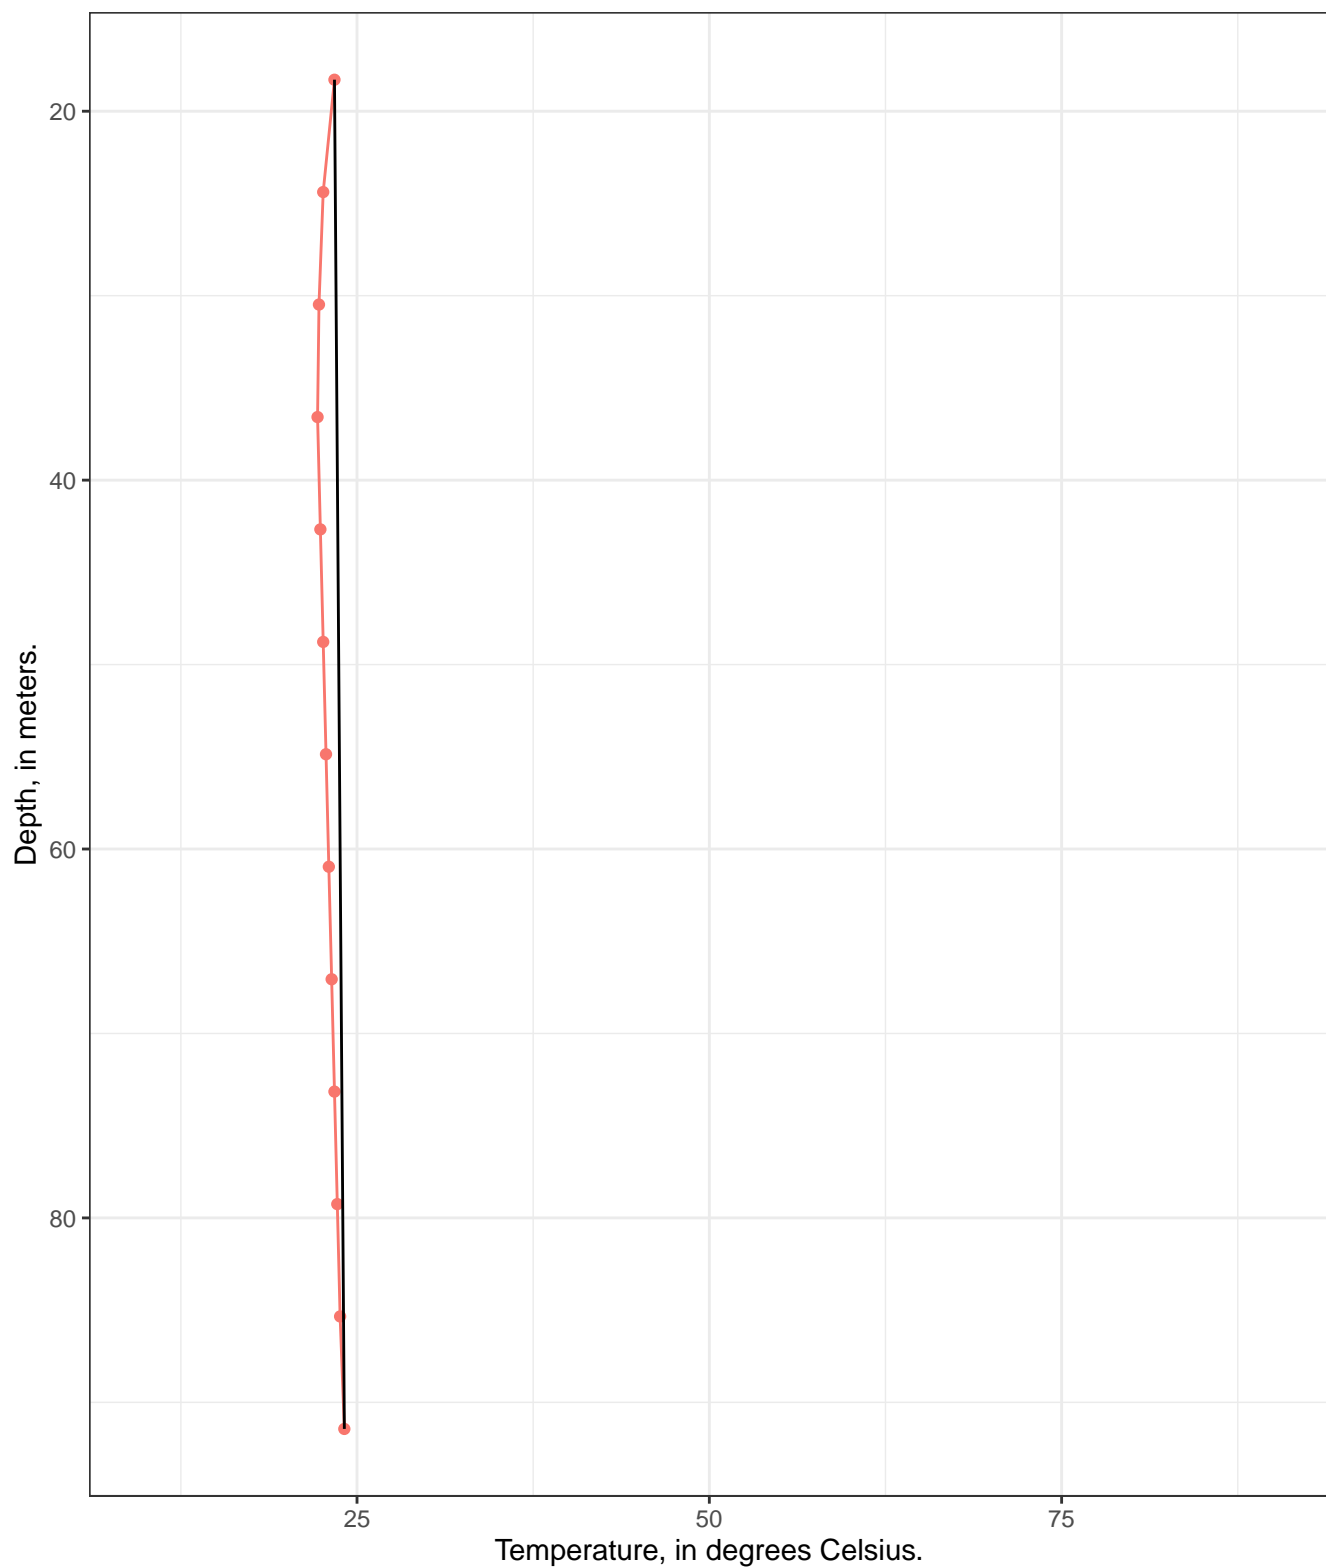

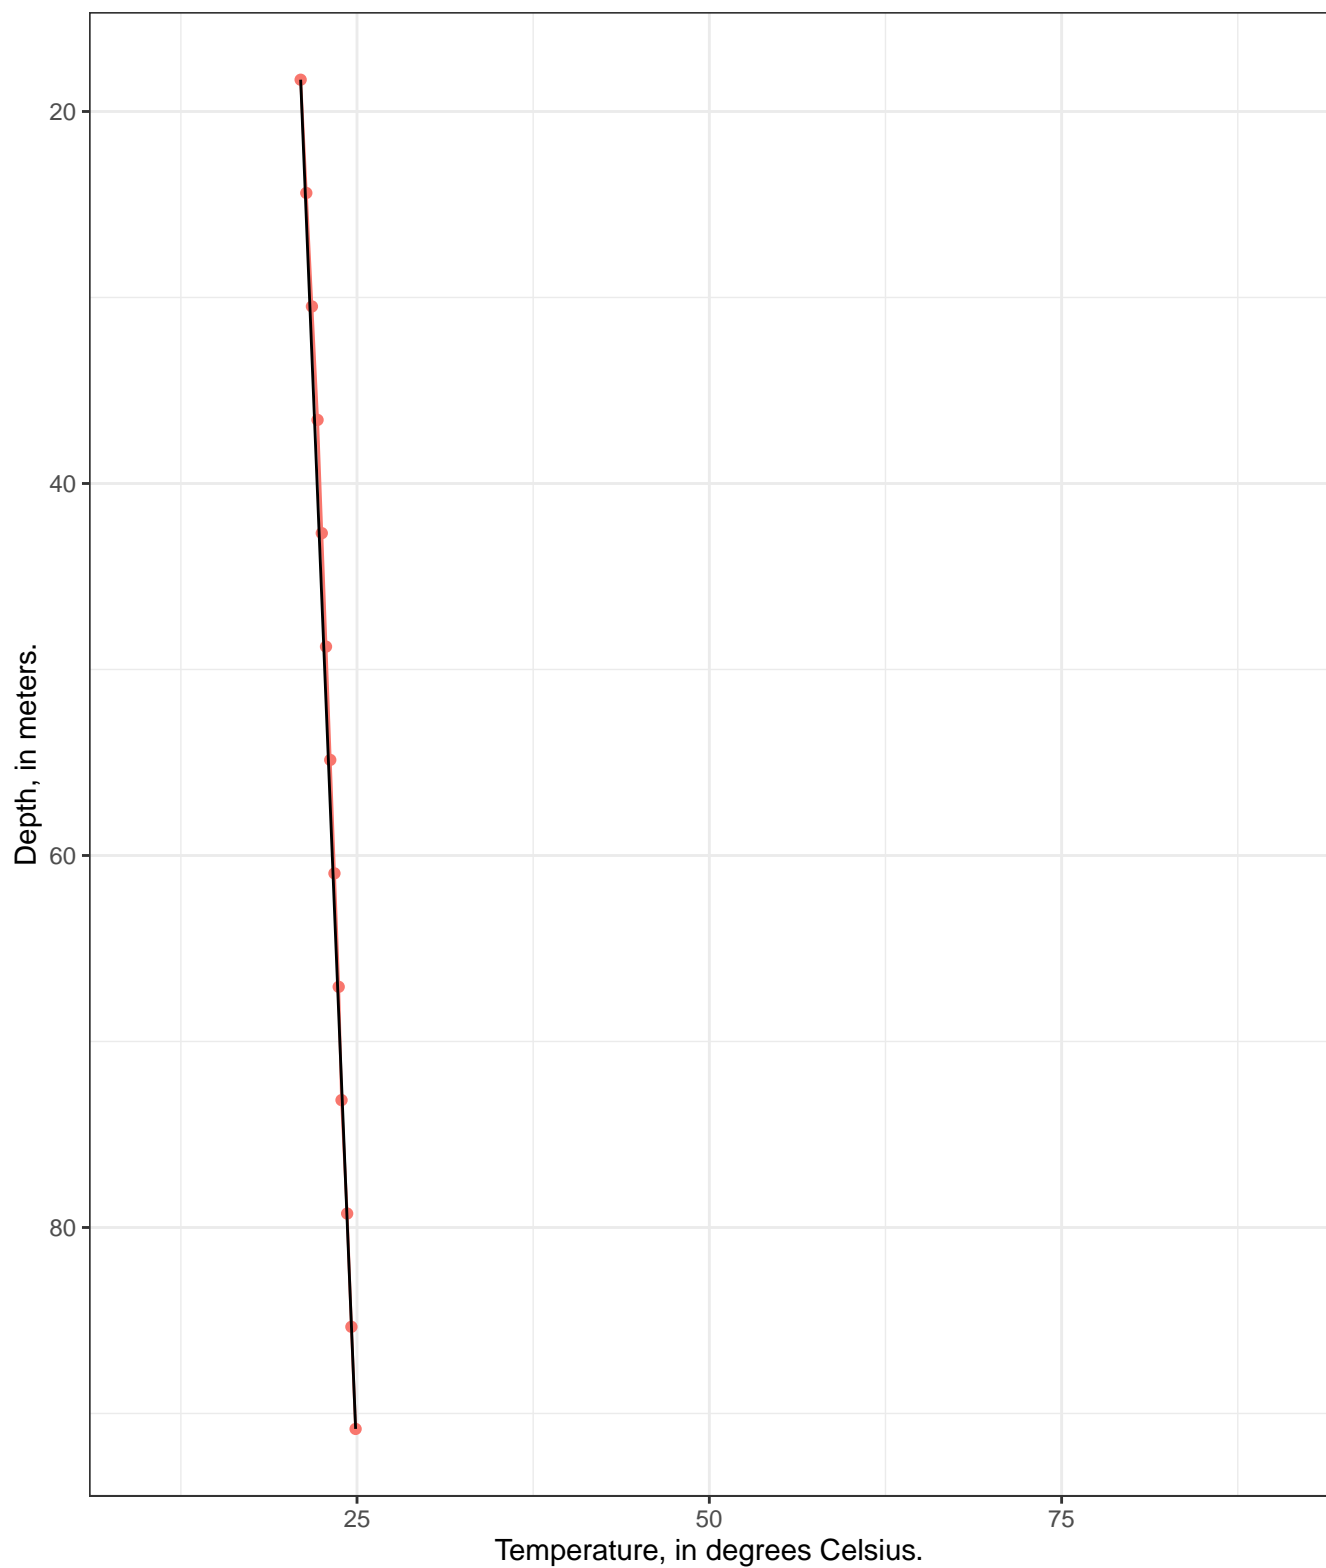

ID: 239 [Phillips\_T-7]

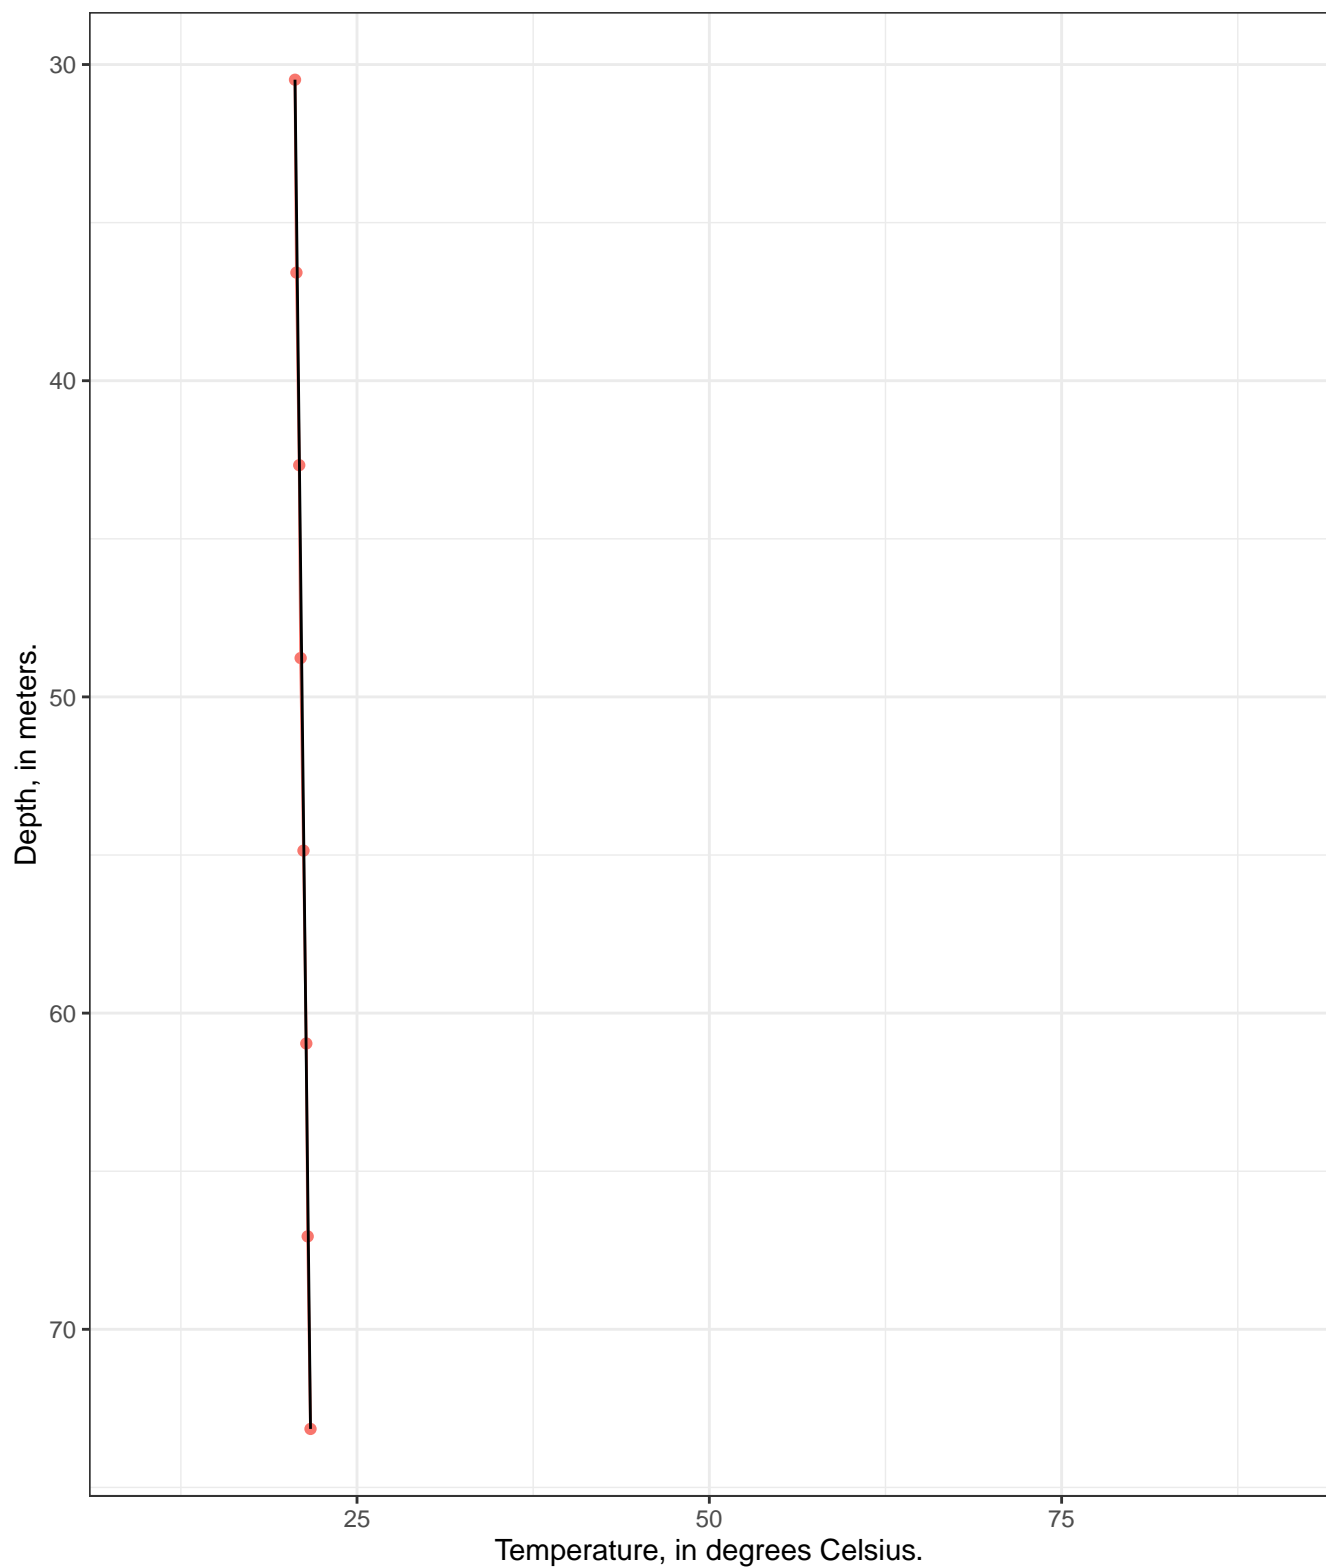

Measurement date 1980-01-11



ID: 240 [Phillips\_T-8]

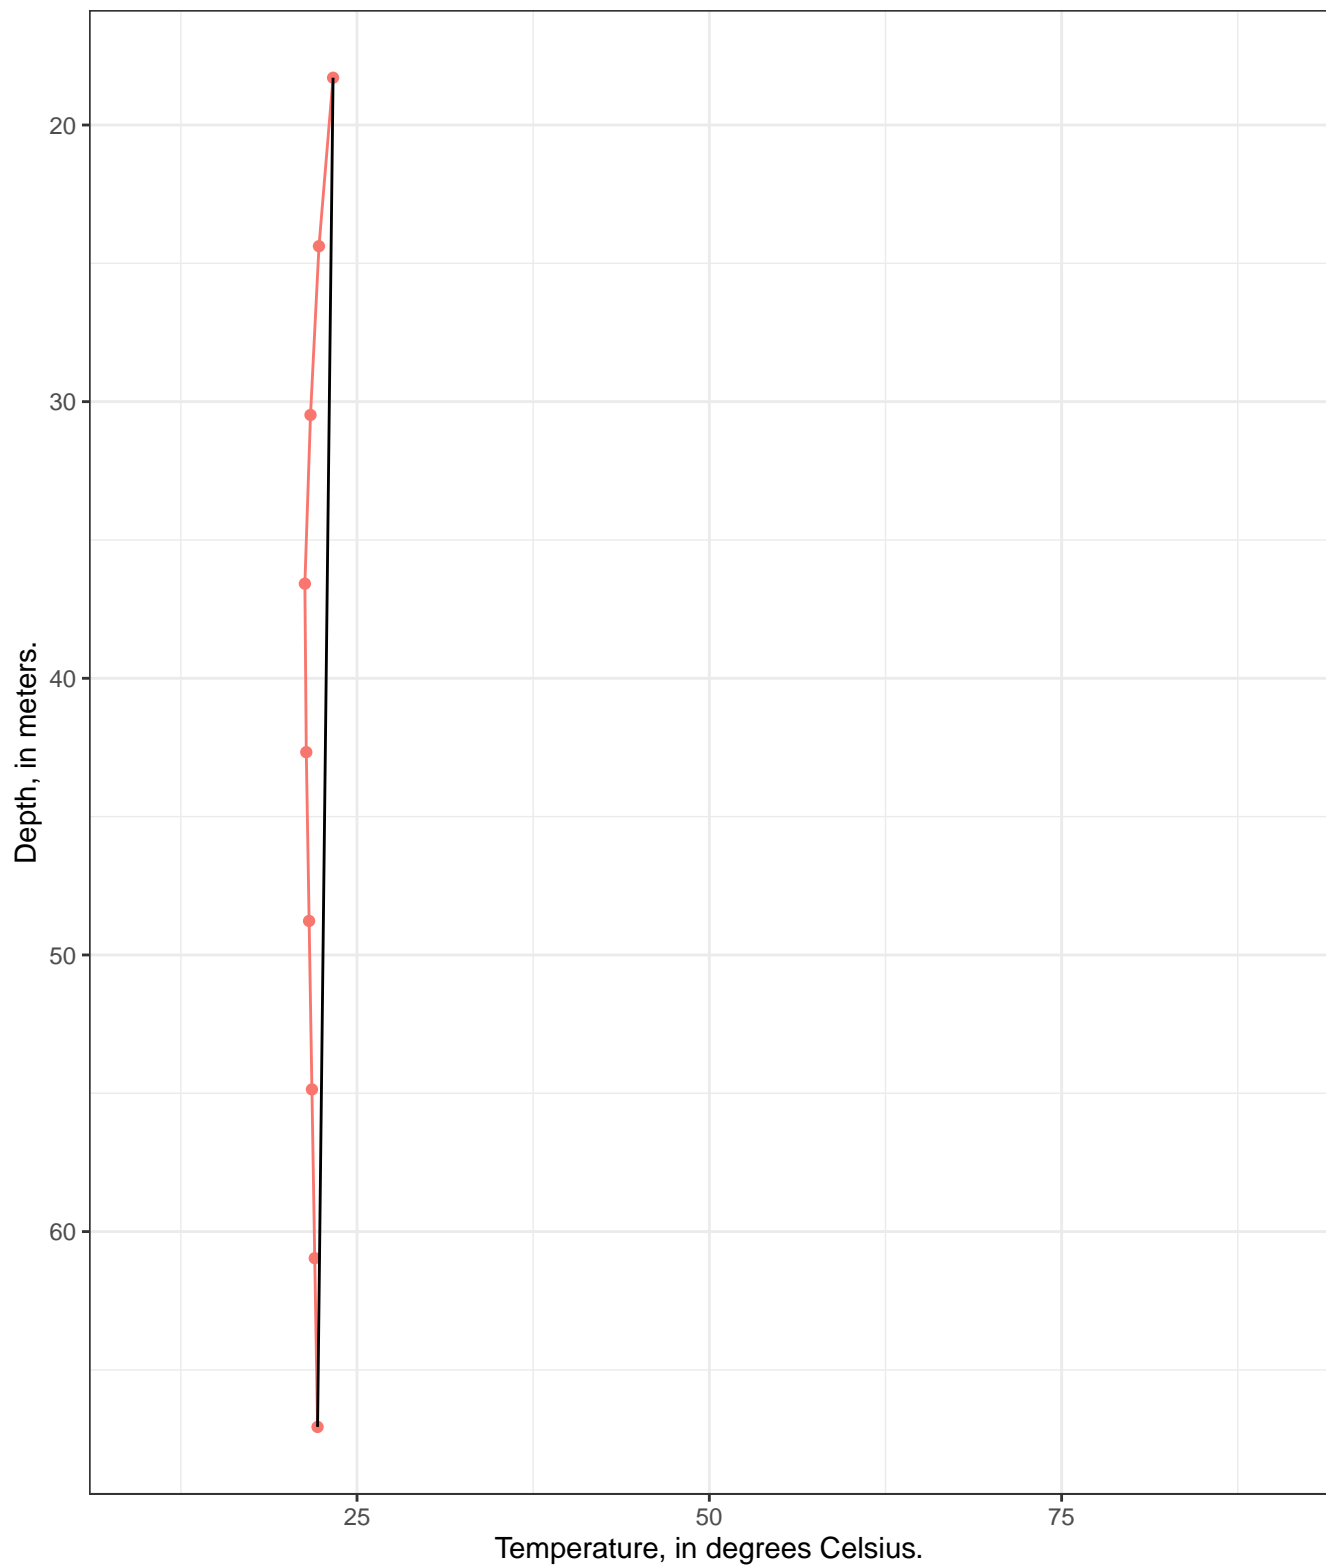

Measurement date 1980-01-08

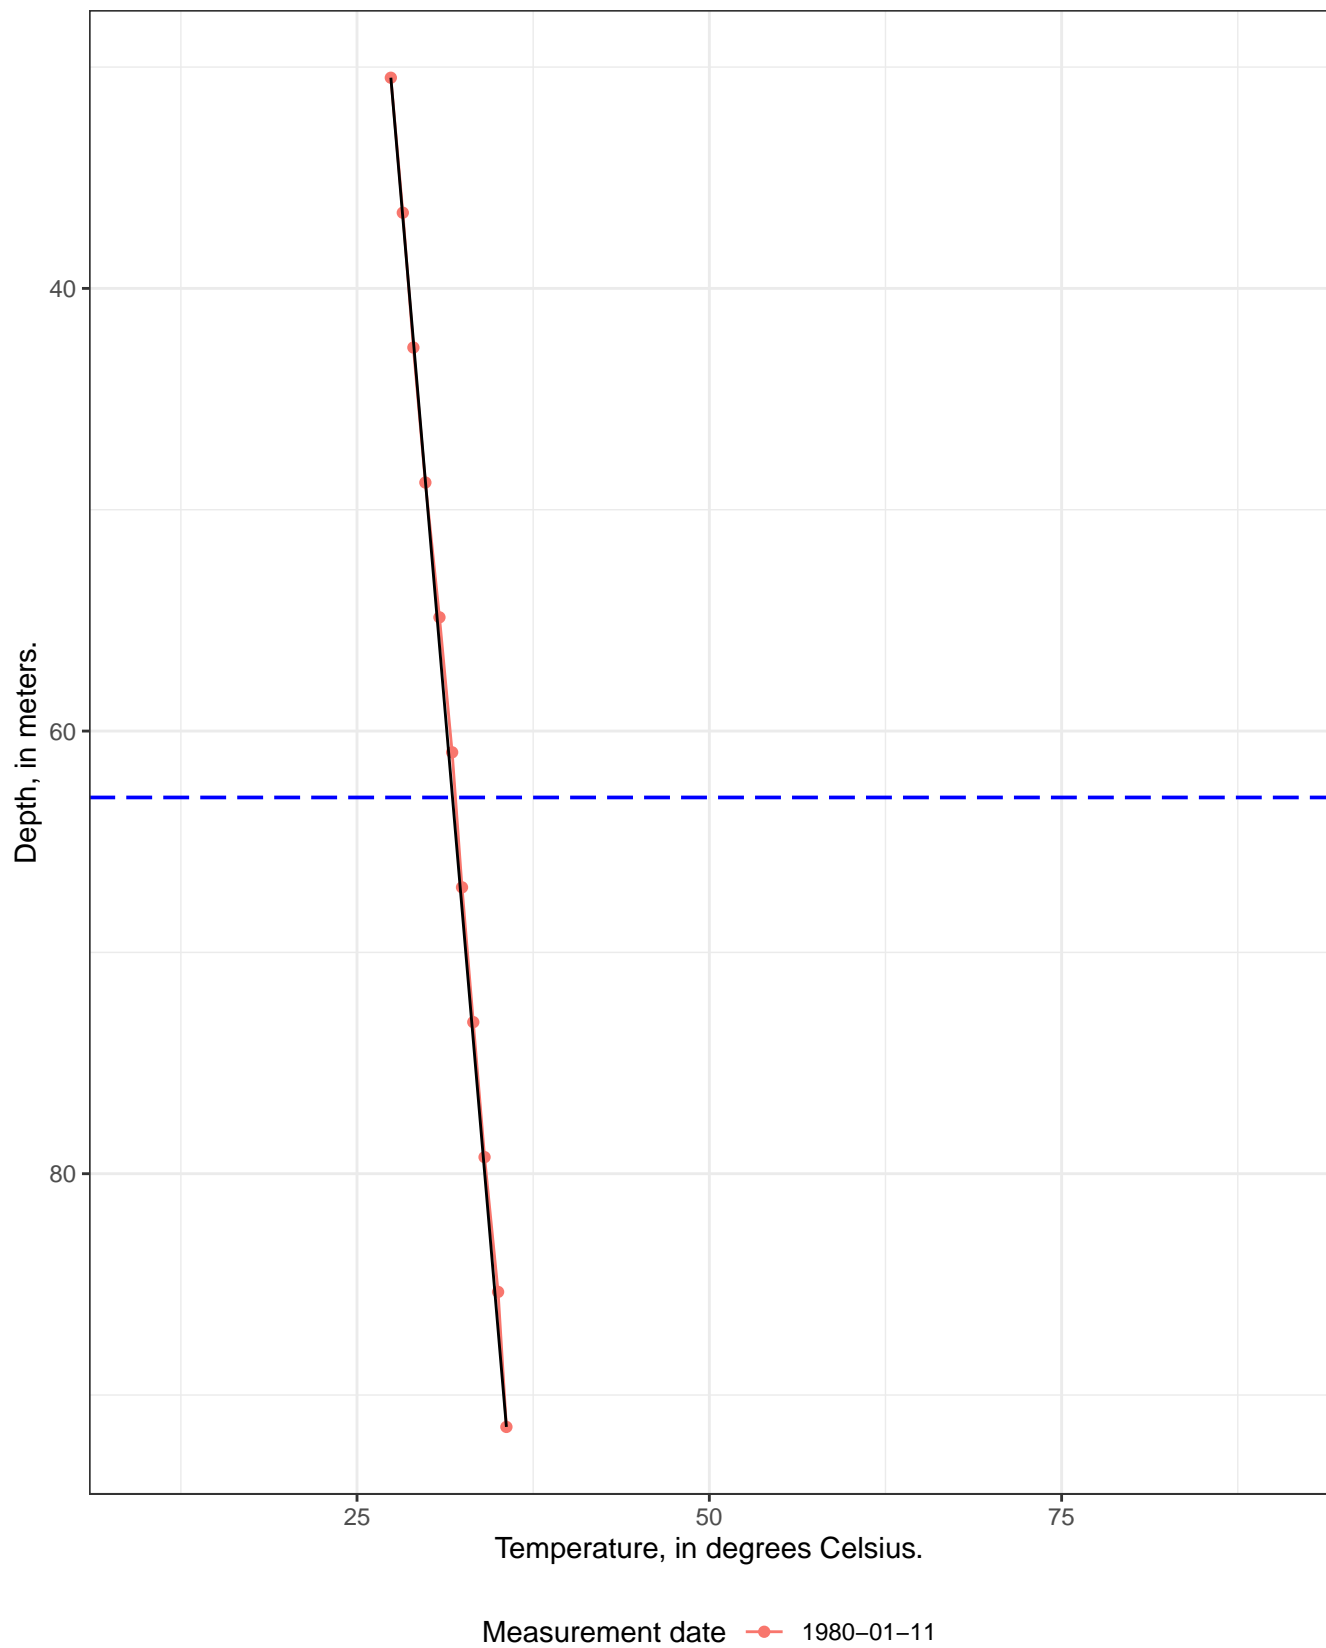

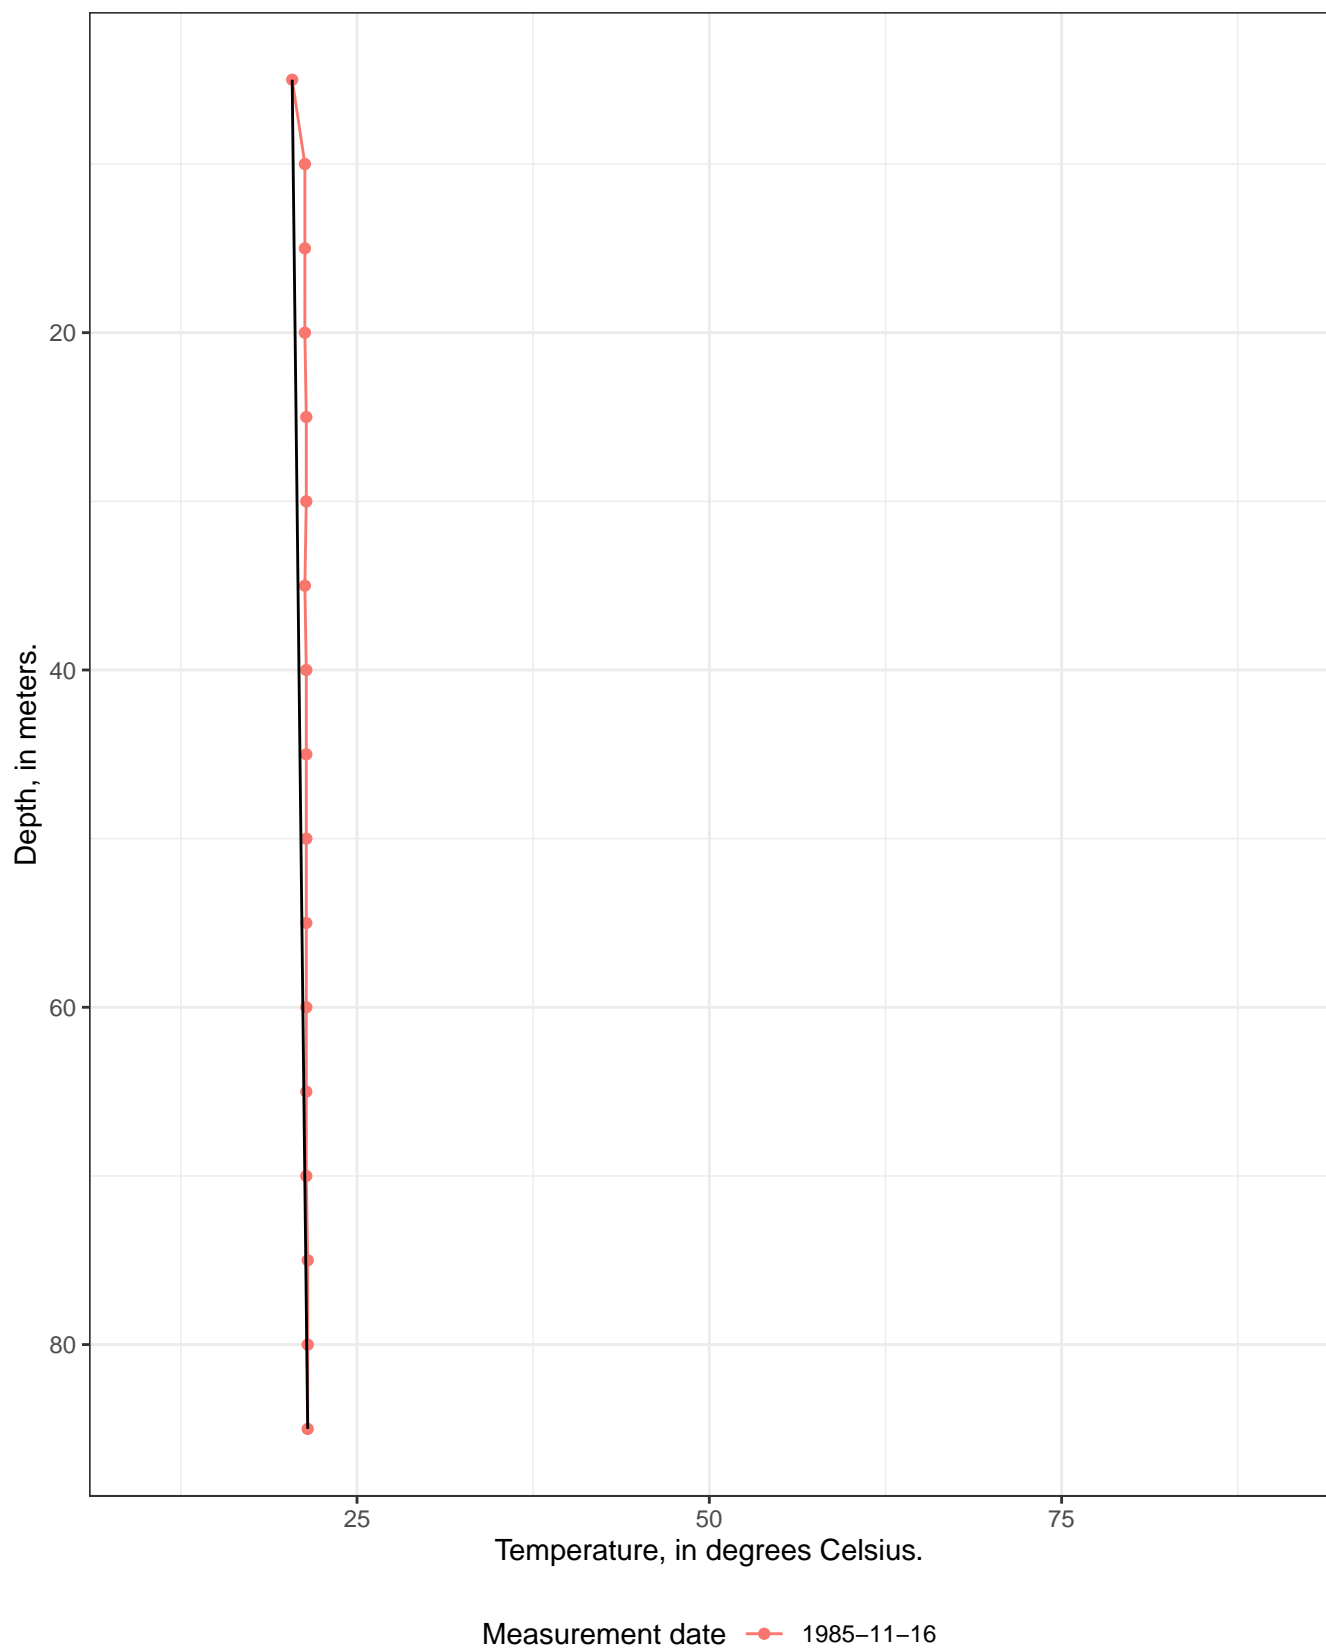

ID: 243 [ST-10]

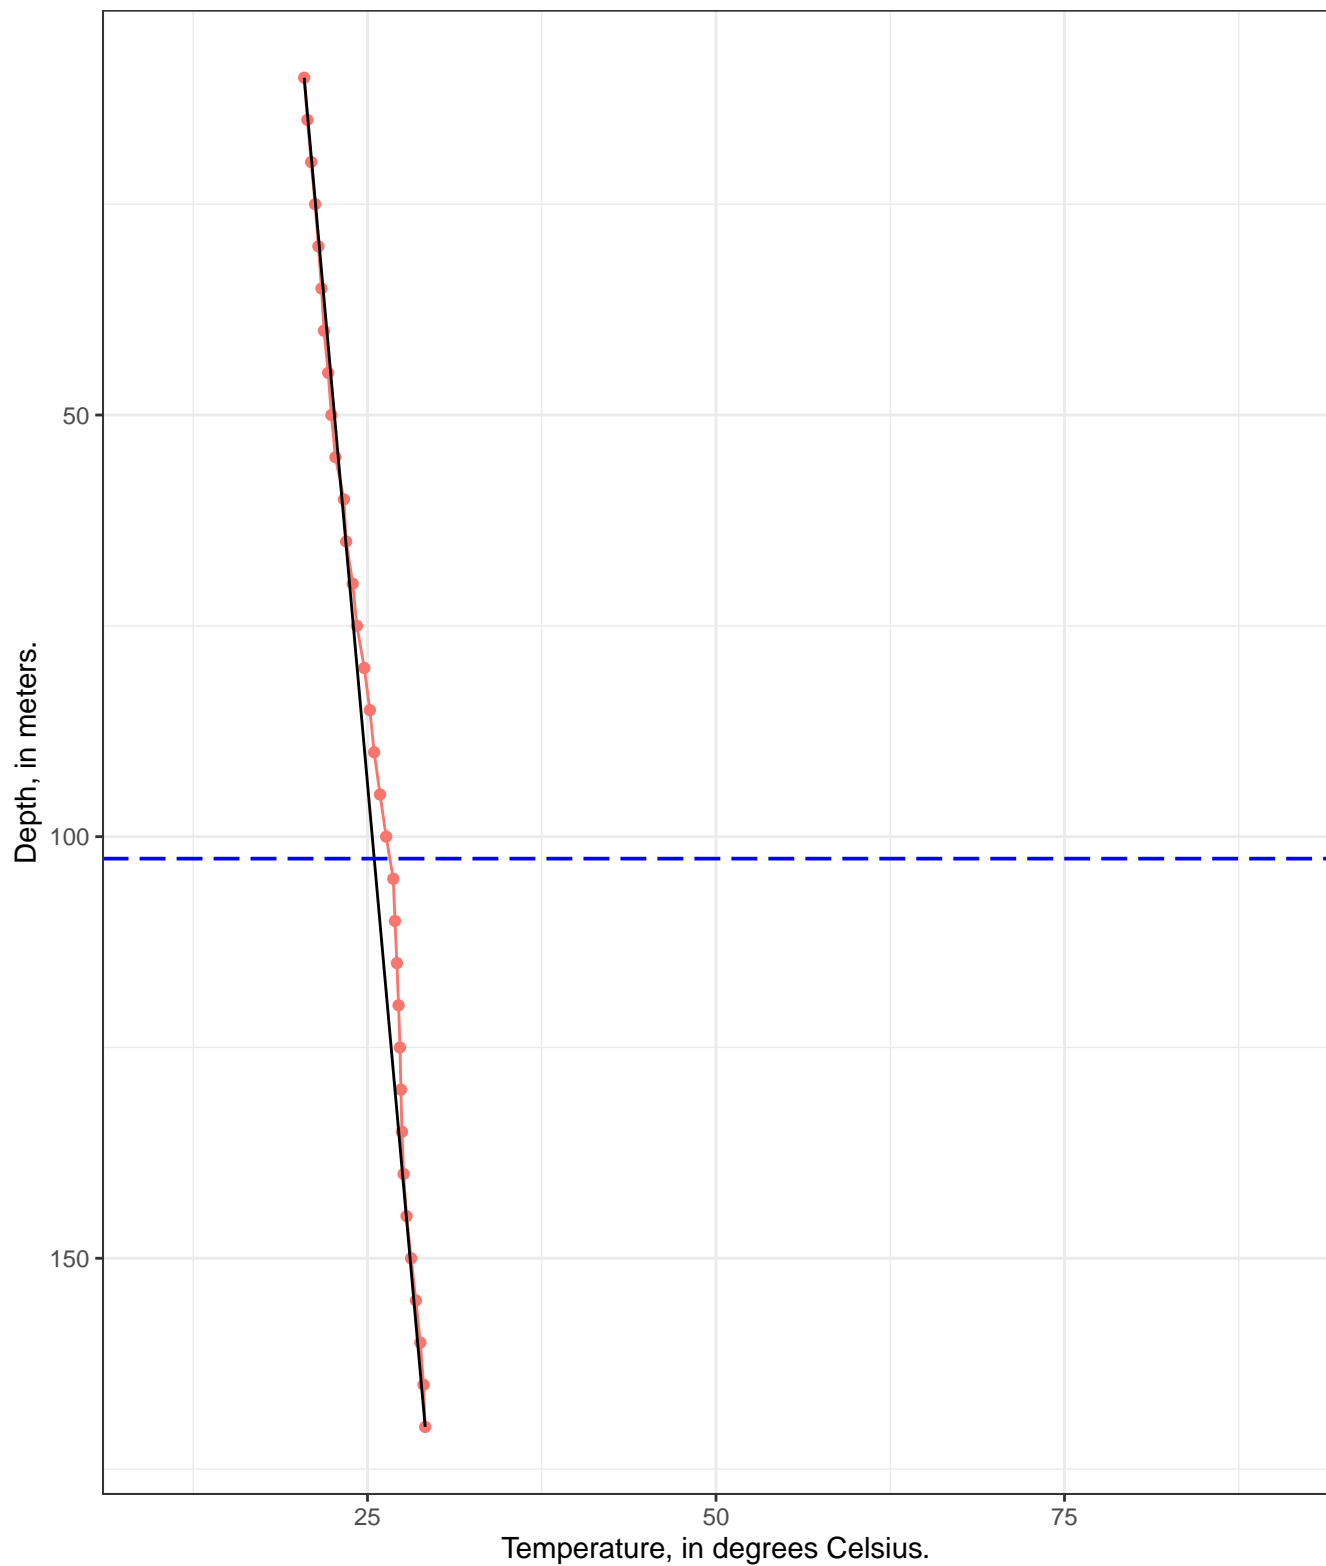

ID: 244 [ST-12]

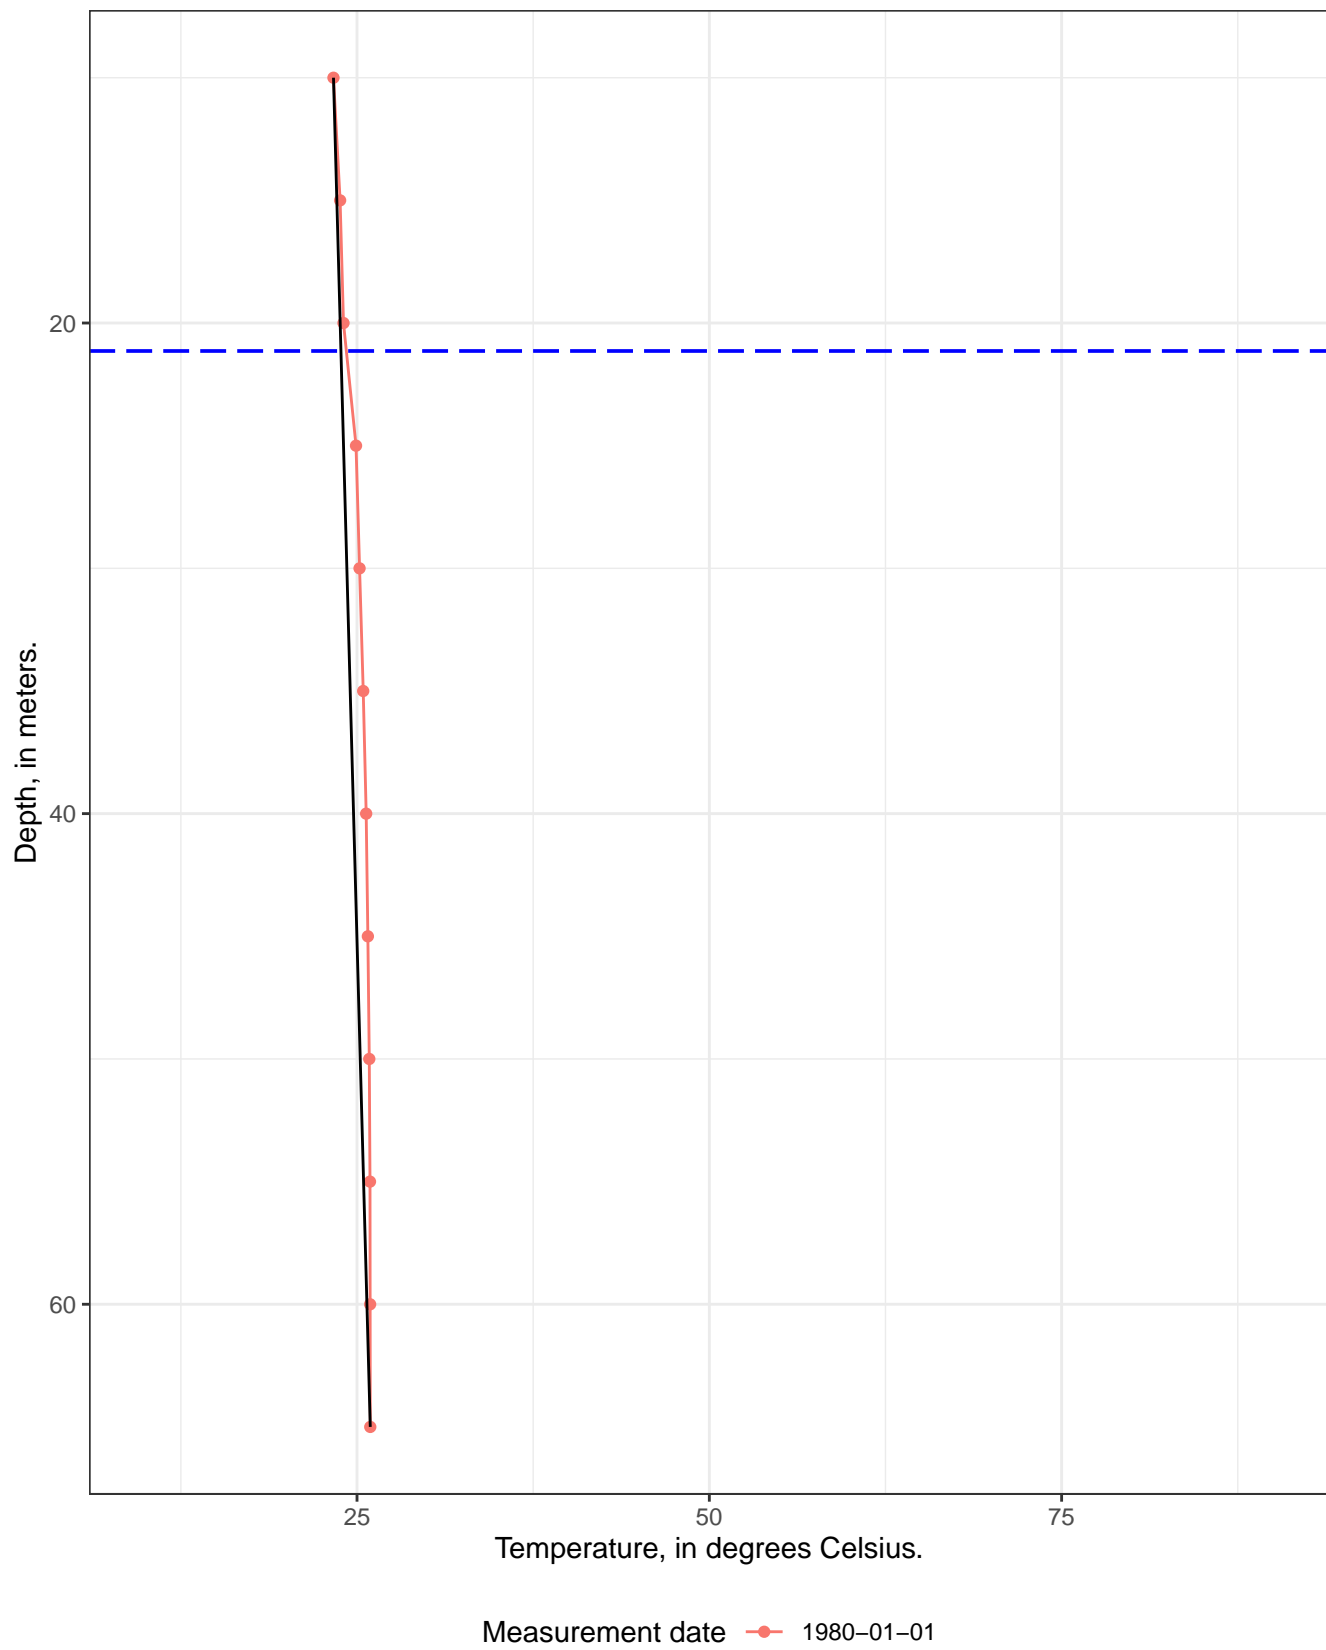

ID: 245 [ST-14]

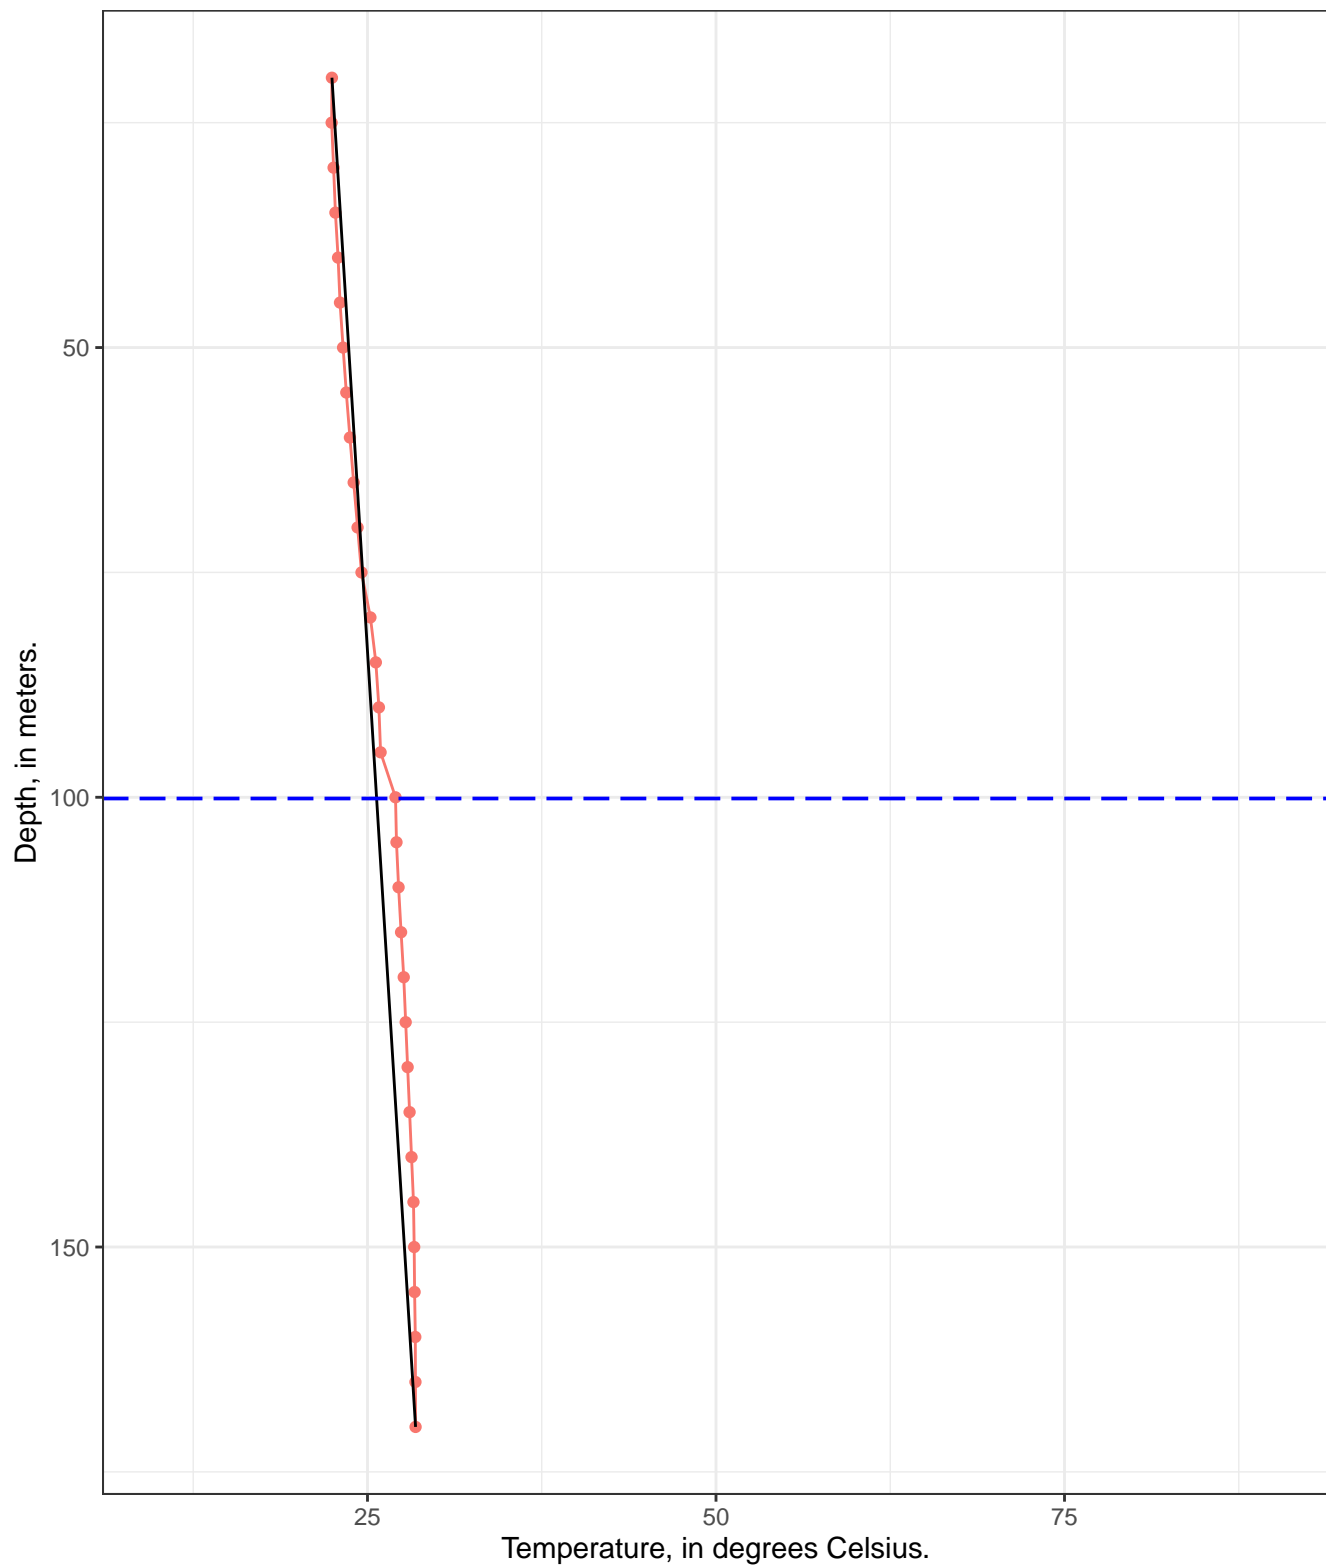

ID: 246 [ST-15]

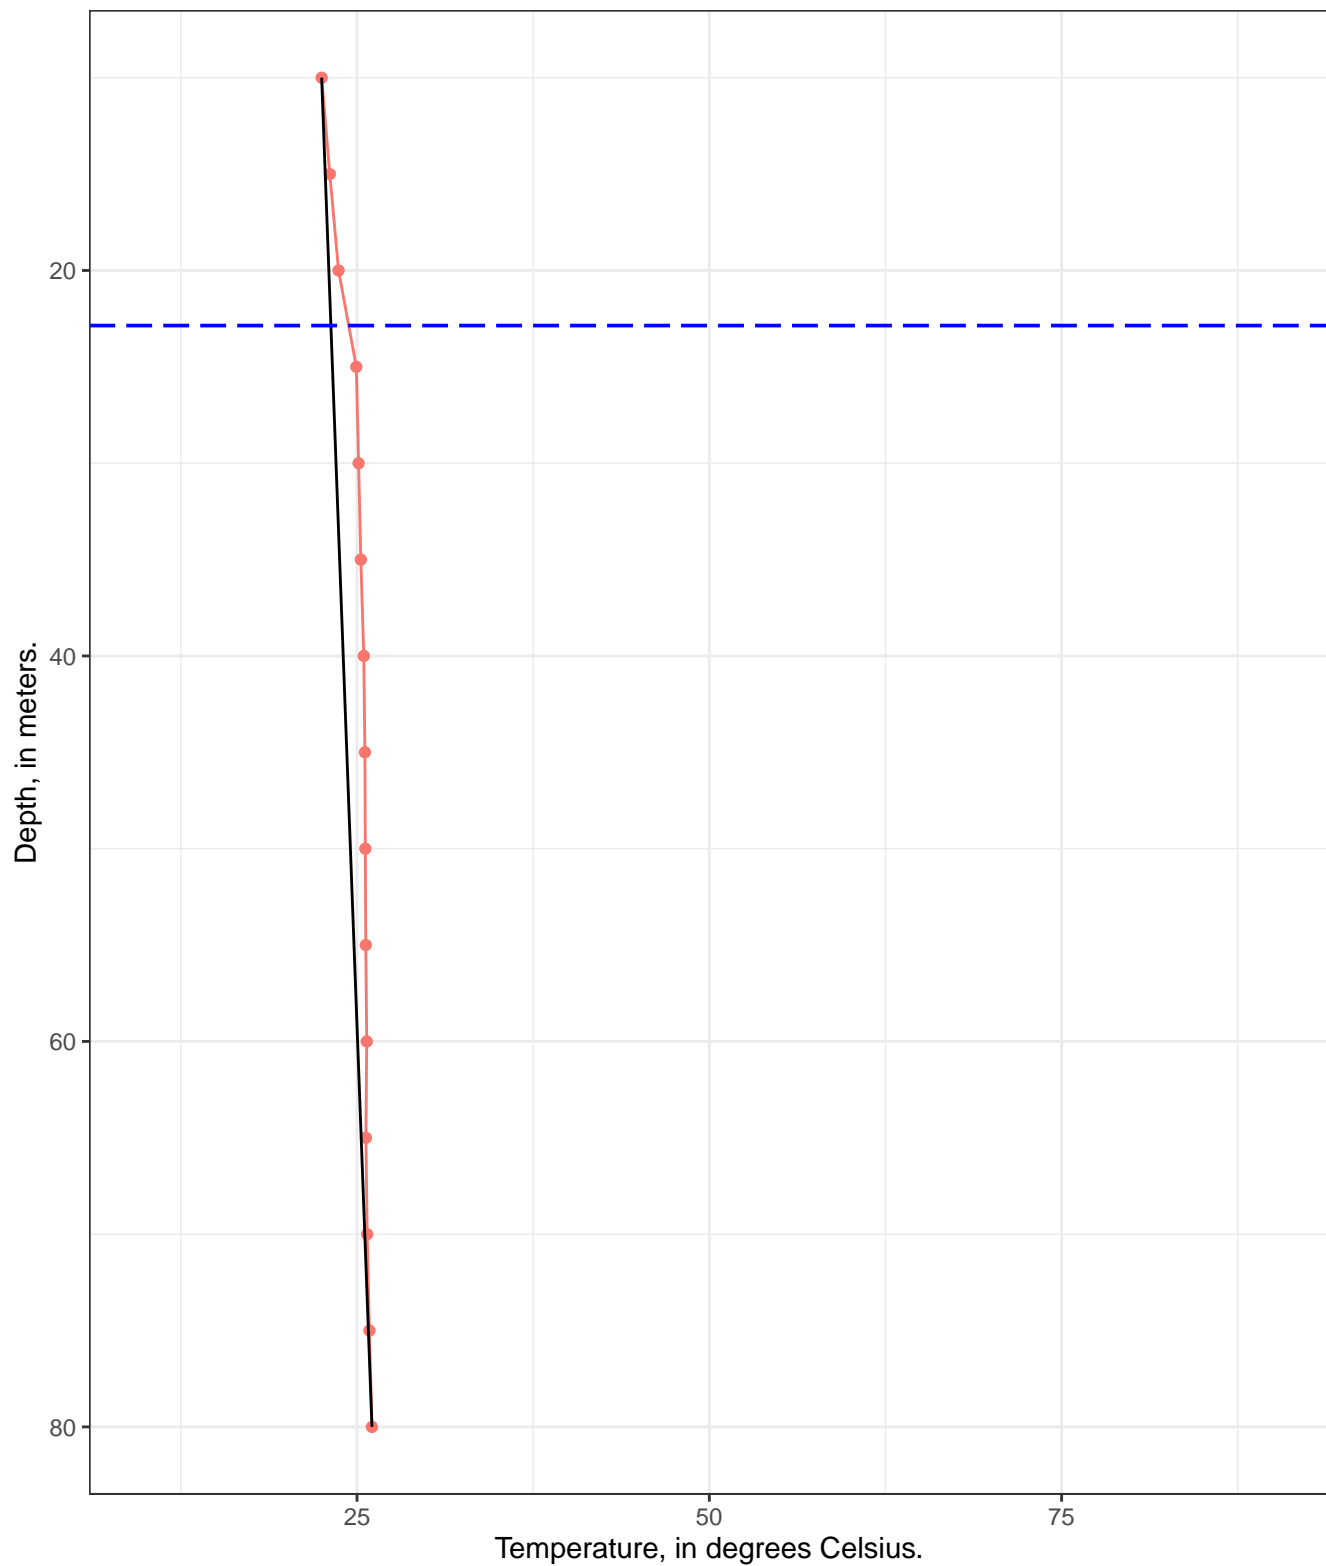

ID: 247 [ST-21]

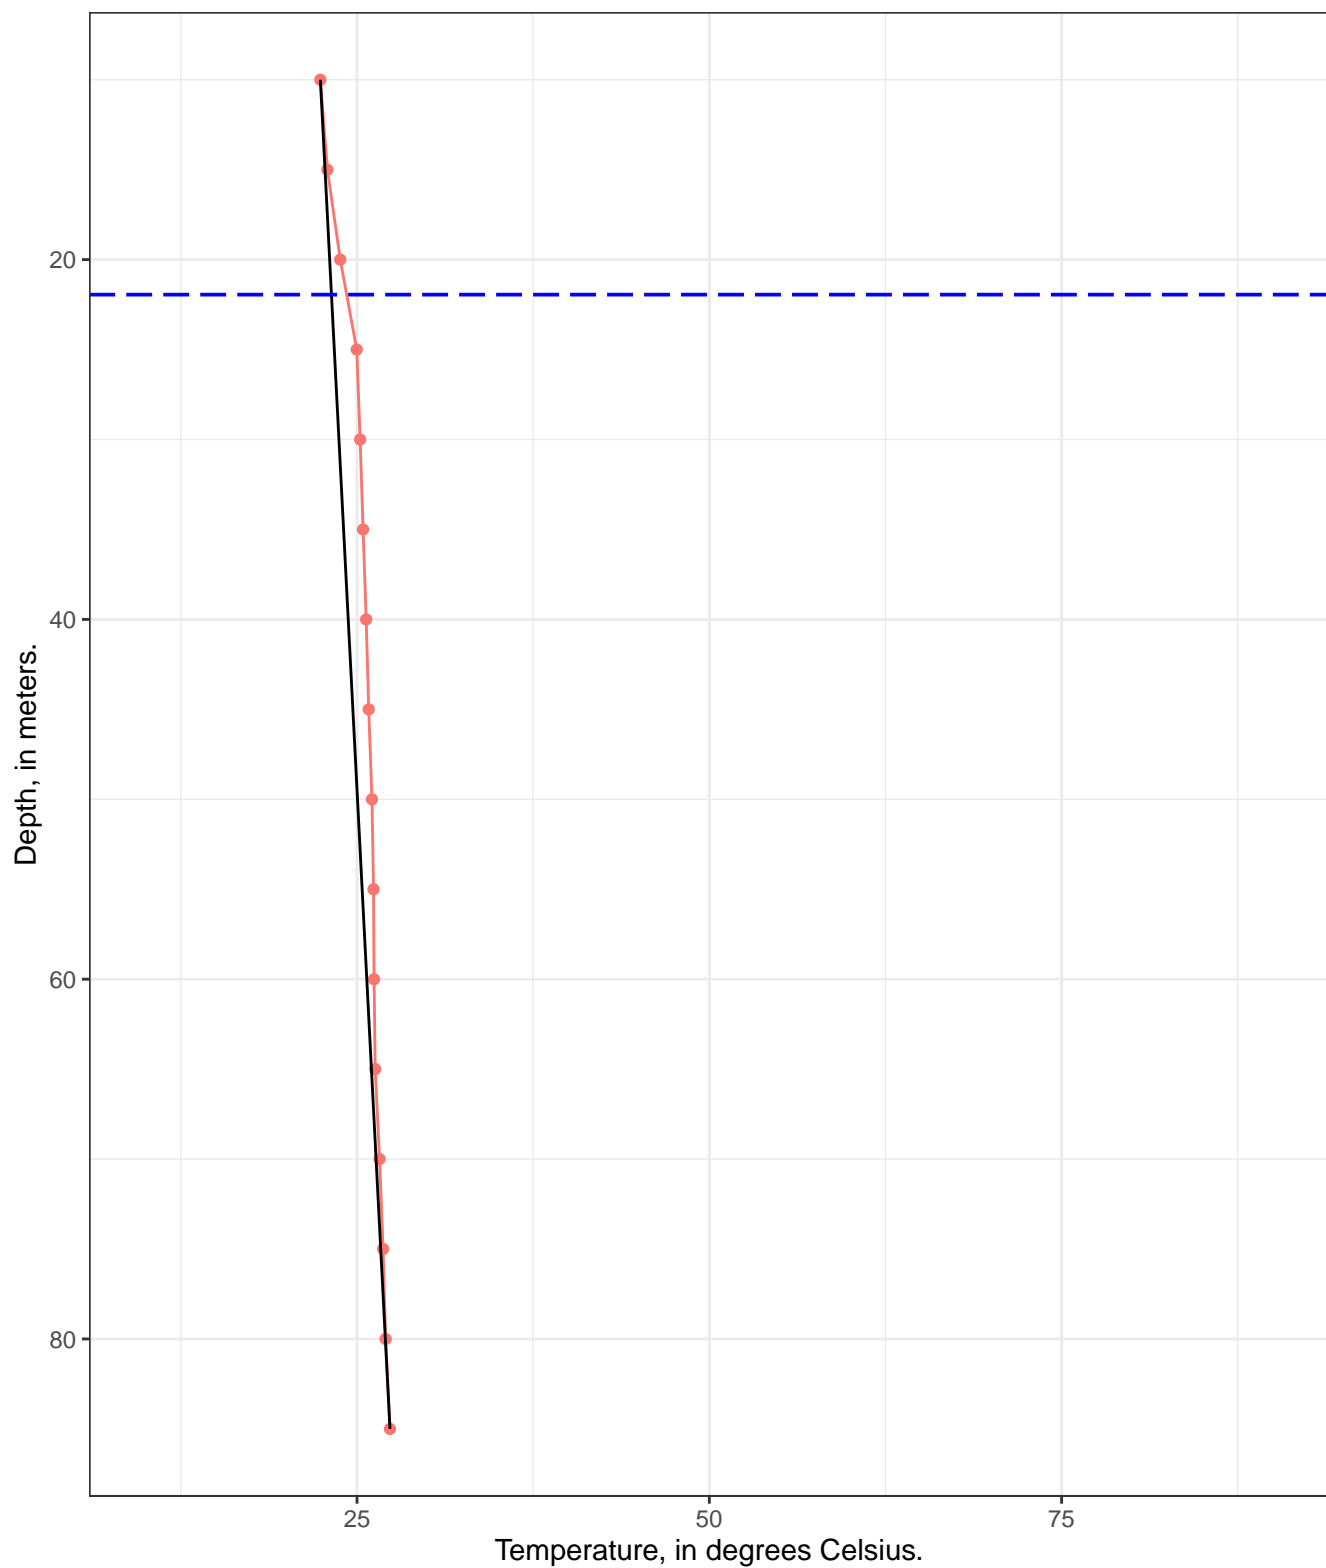



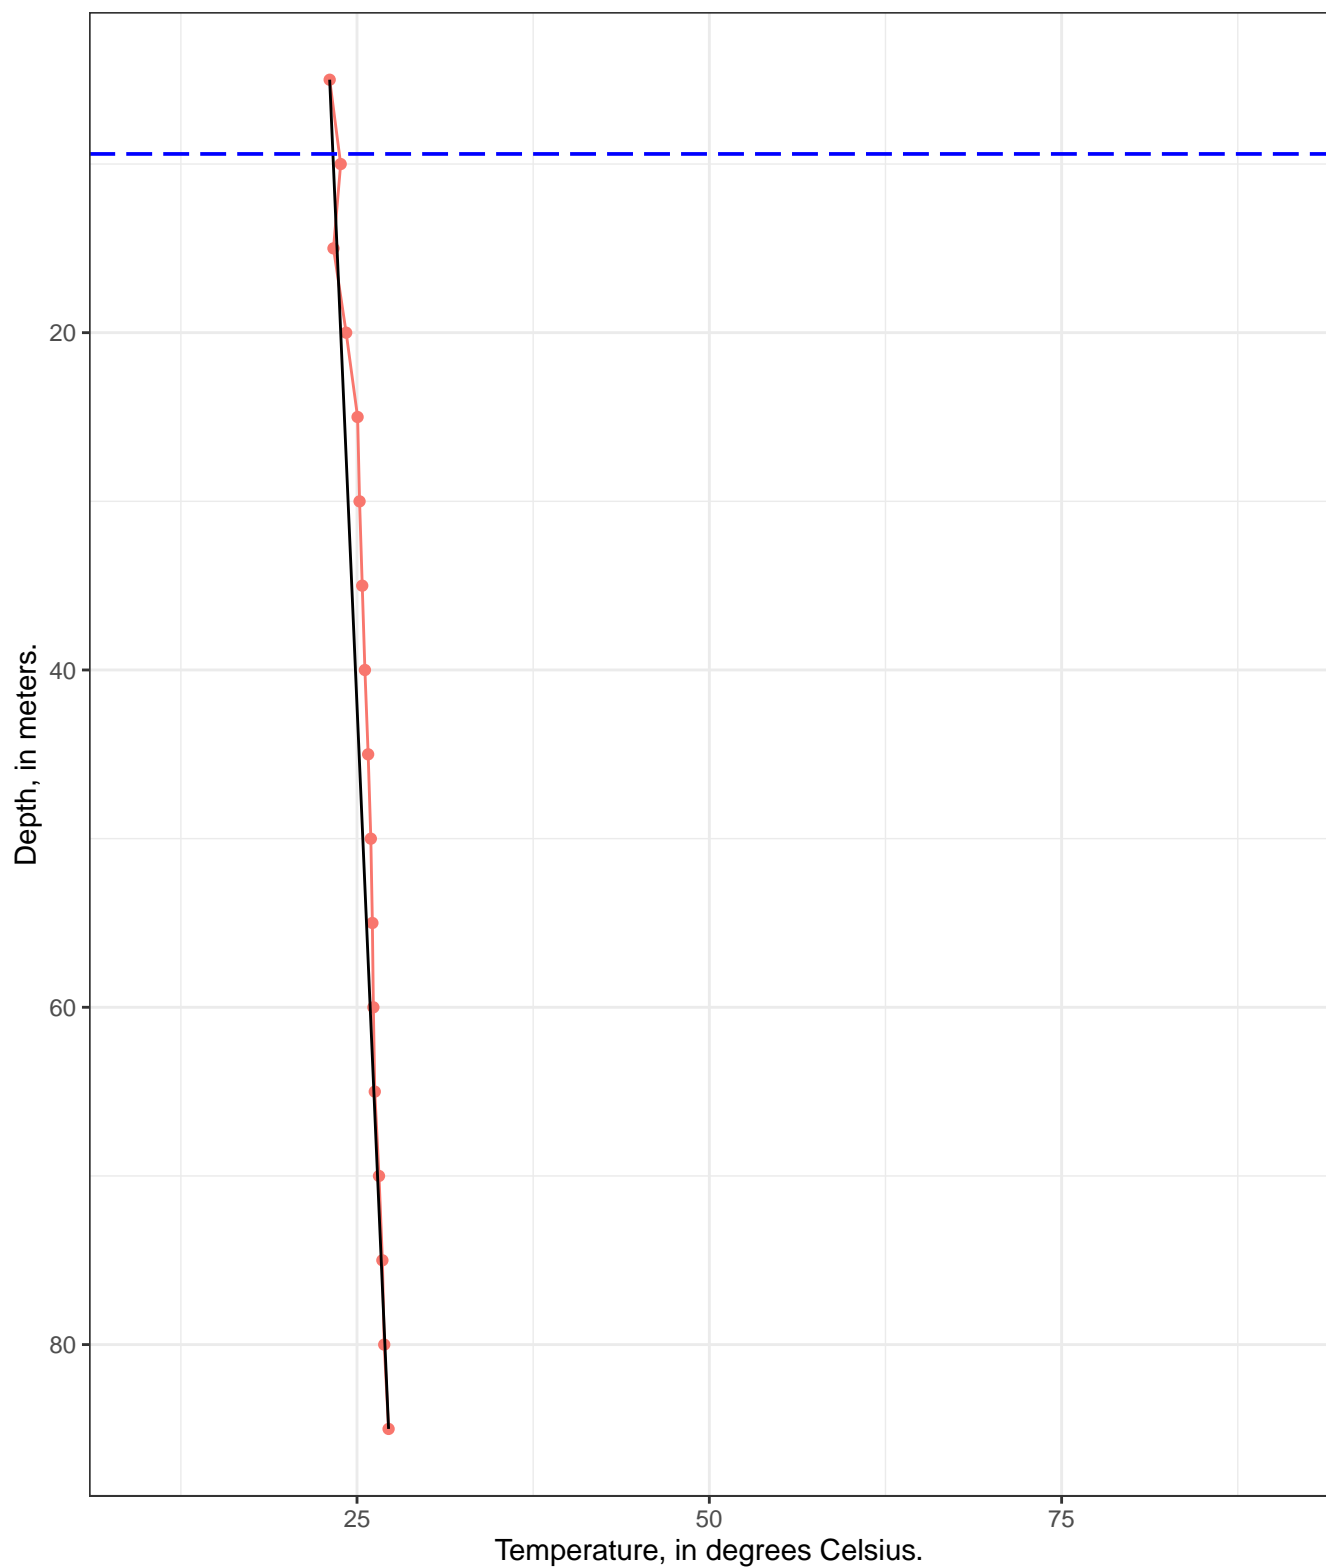

ID: 249 [ST-25]

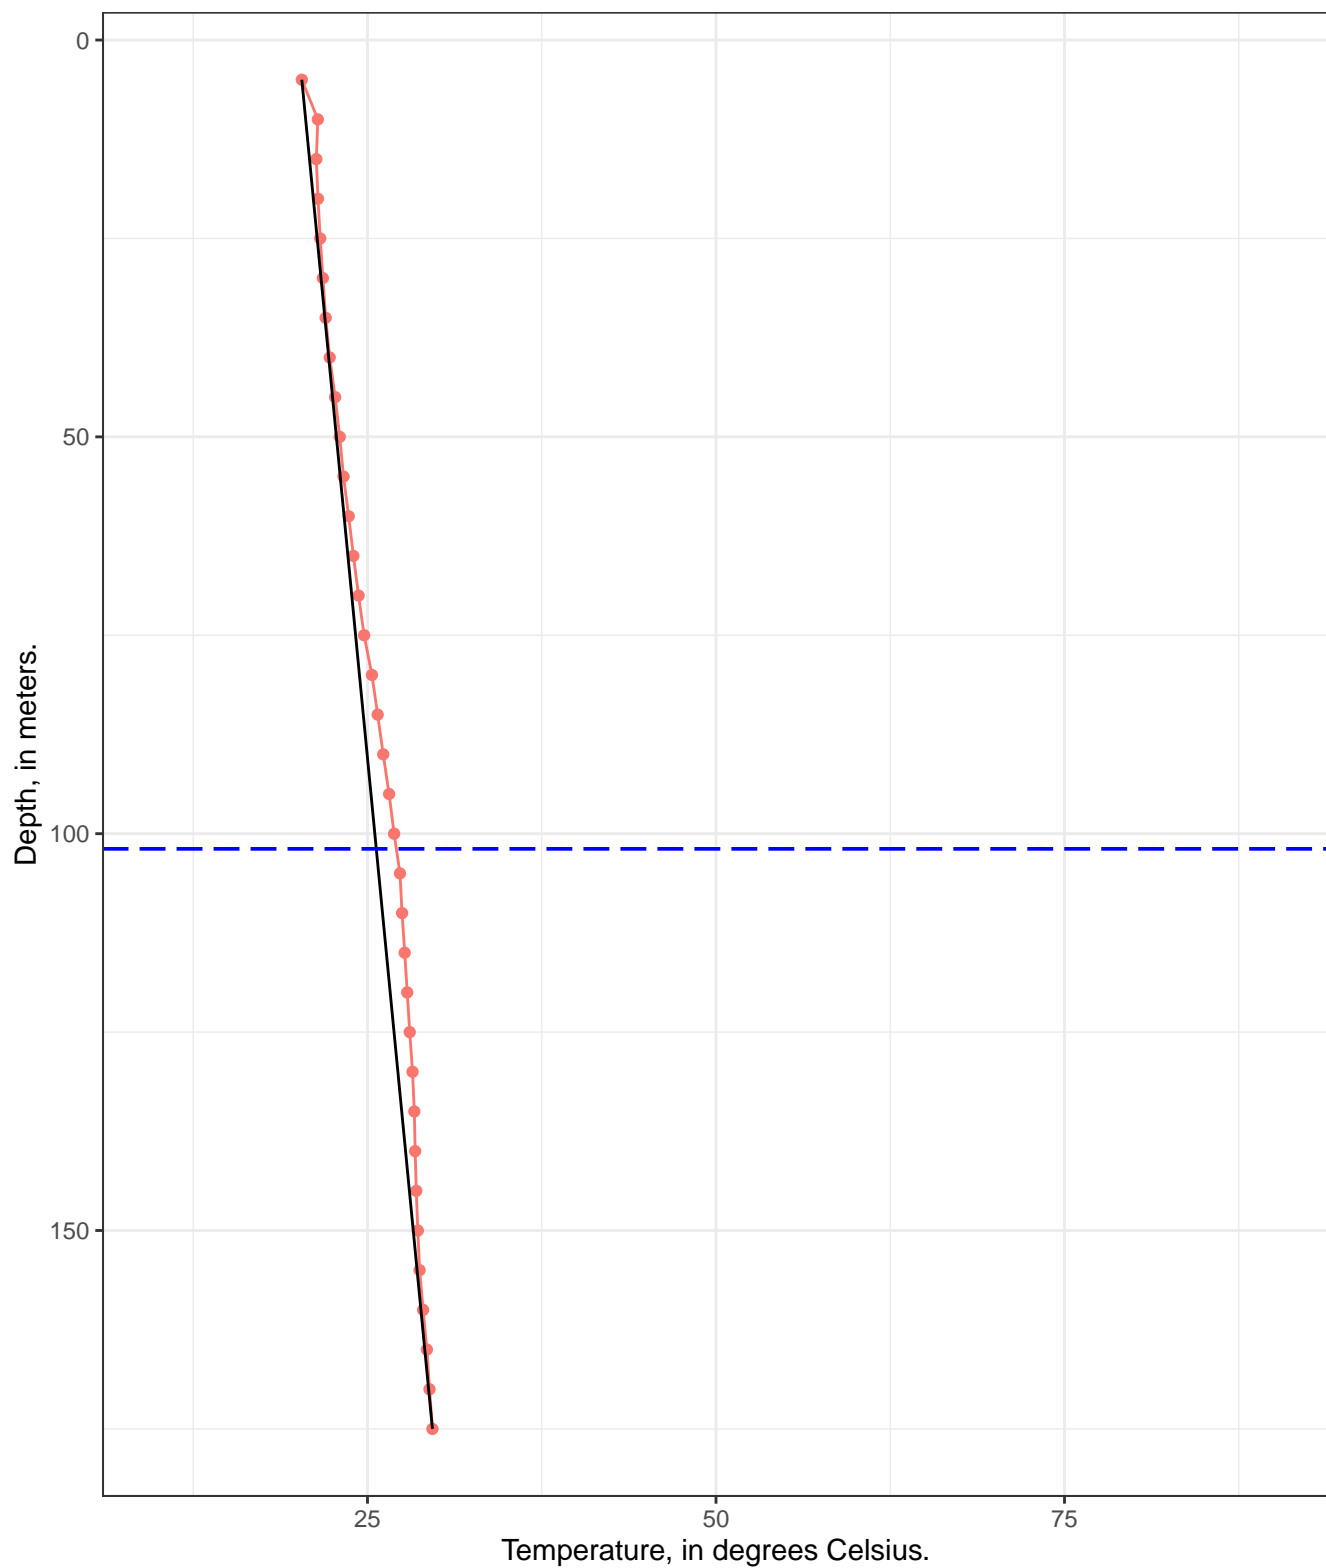

ID: 250 [ST-26]

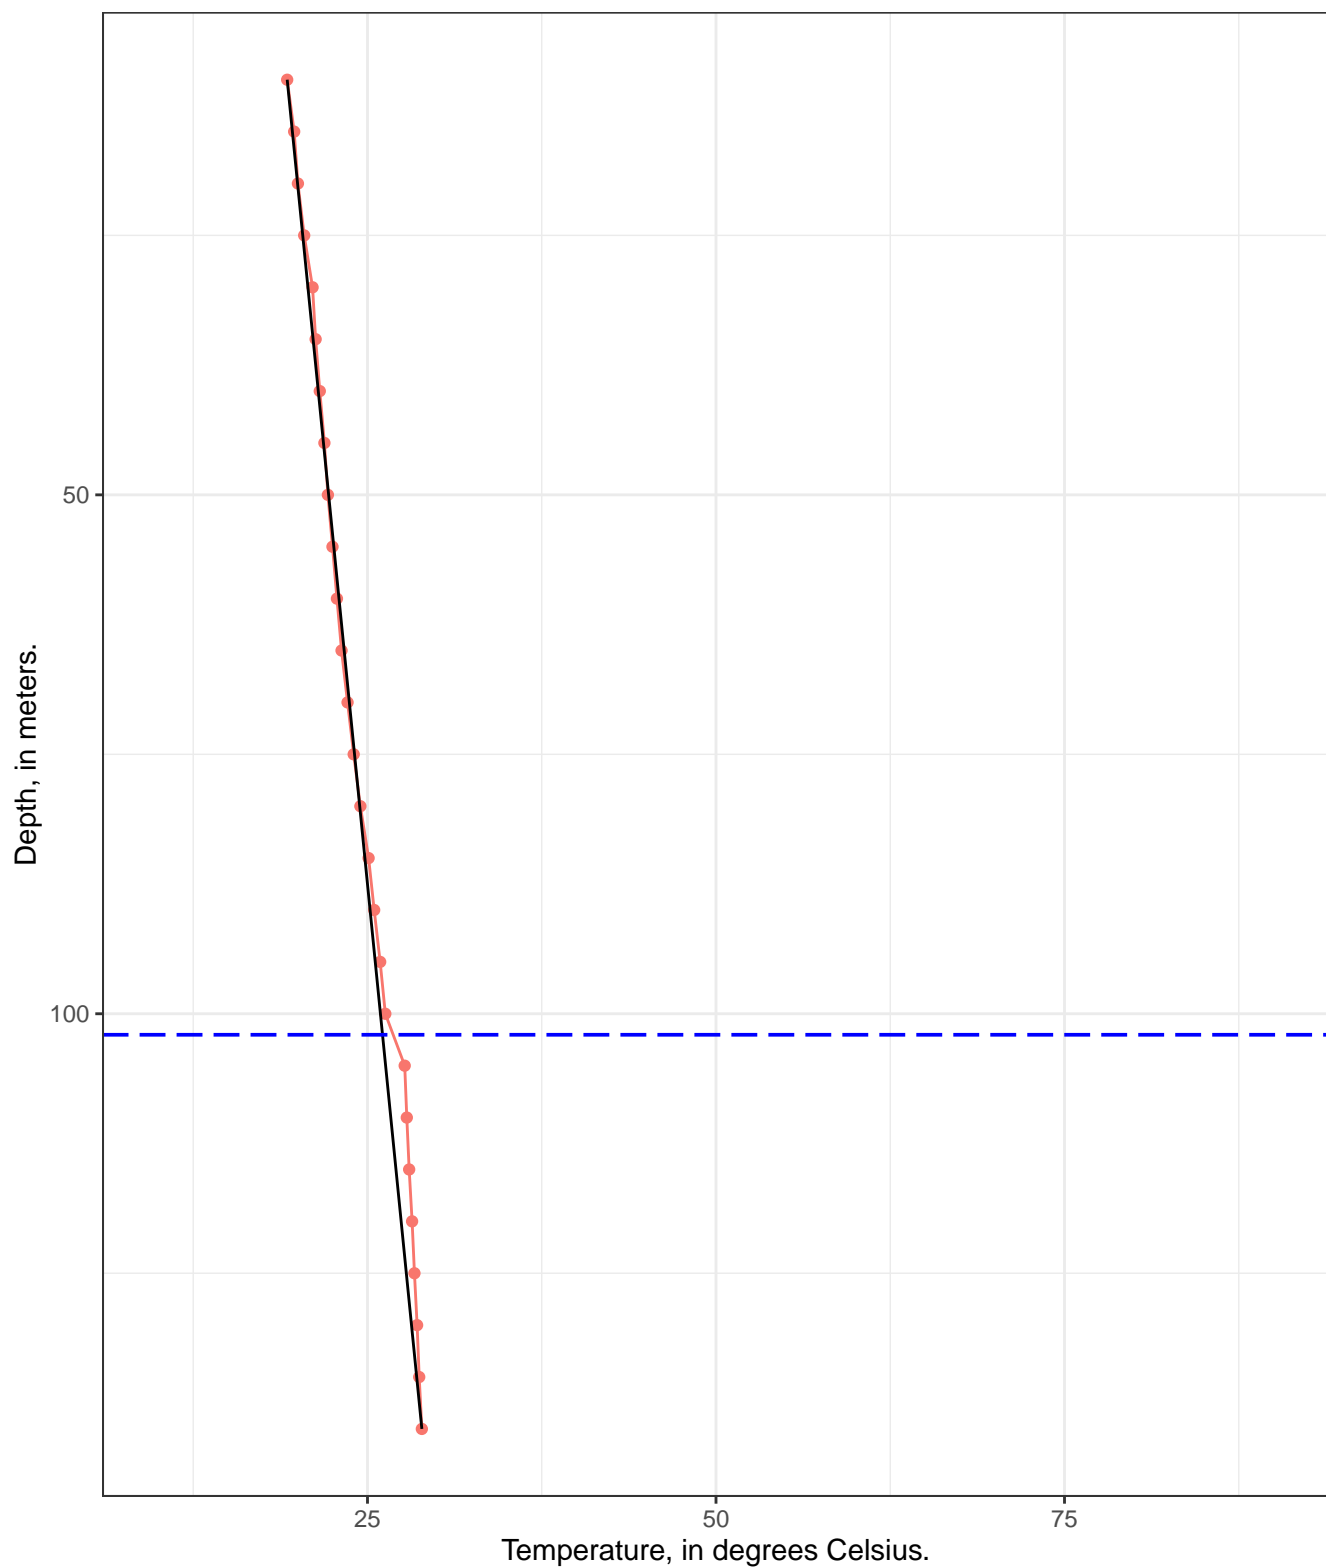

Measurement date 1980-01-01

ID: 251 [ST-27]

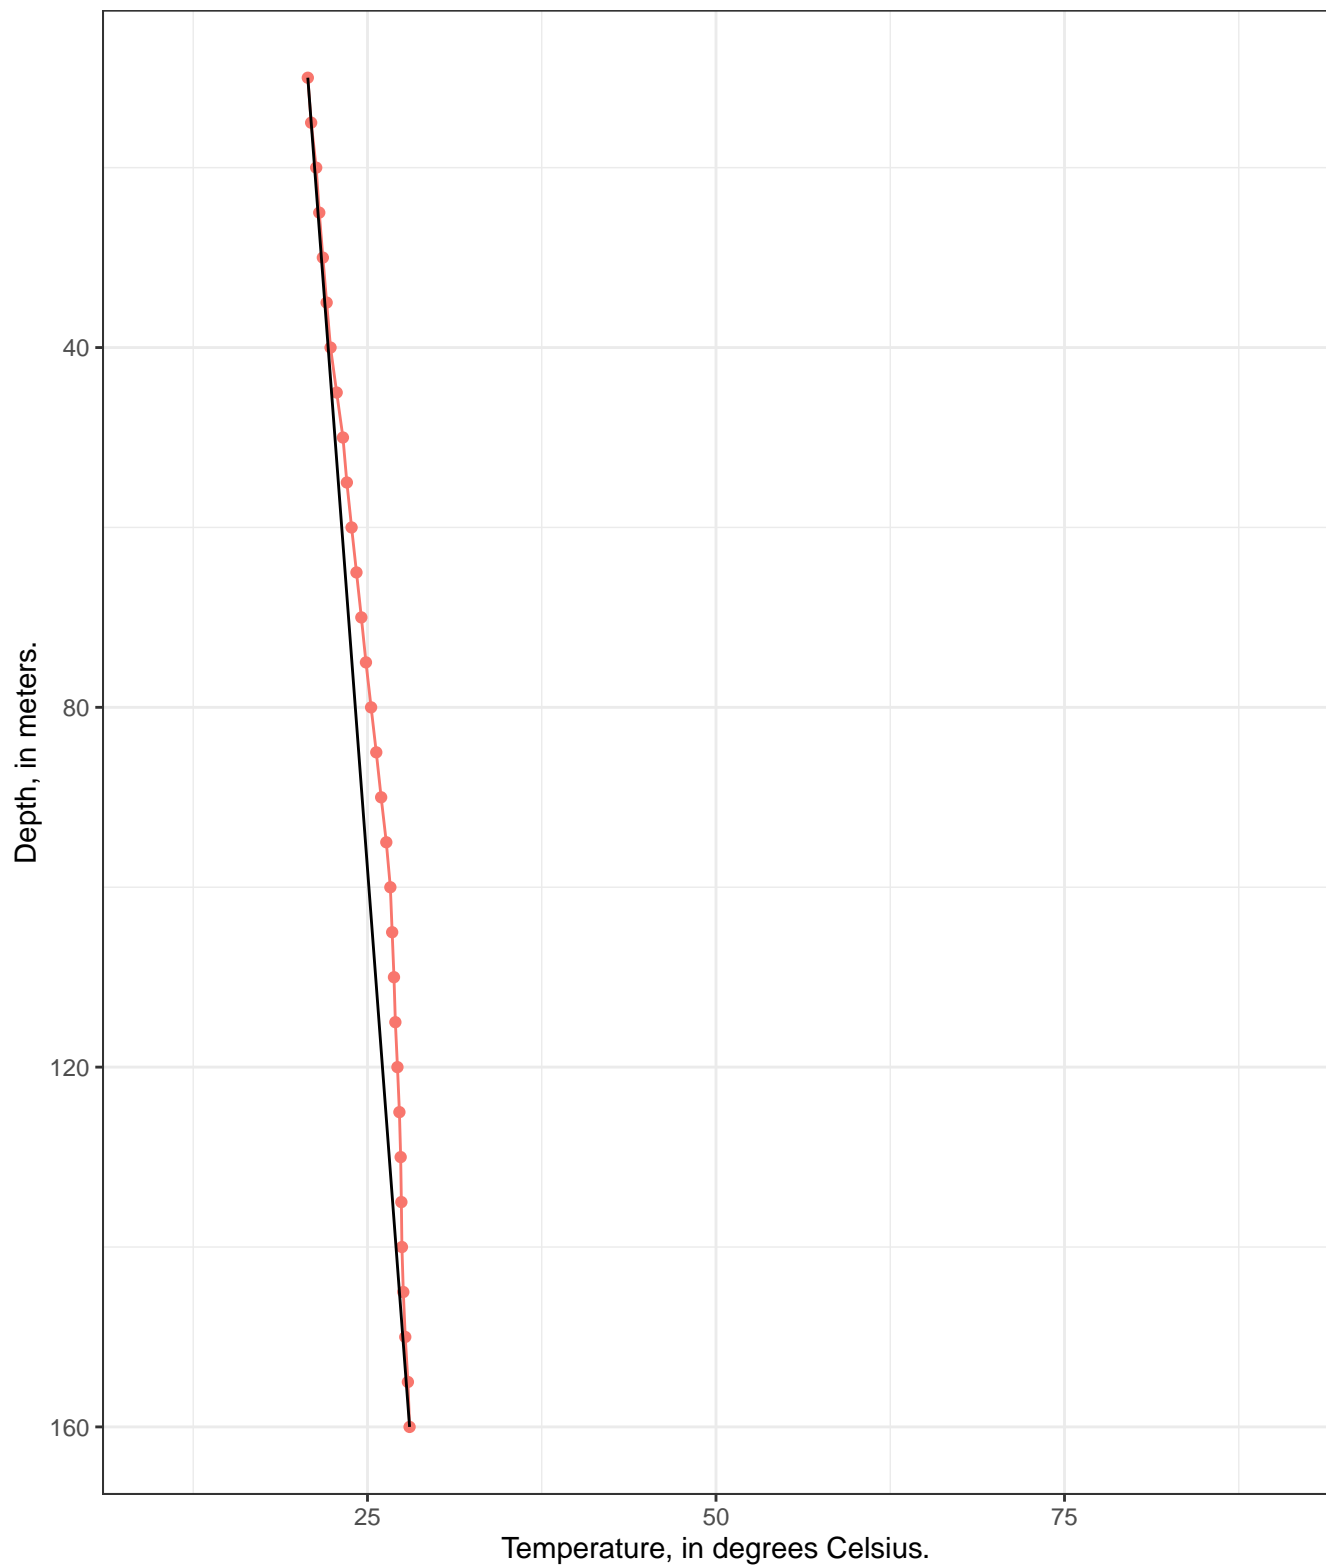

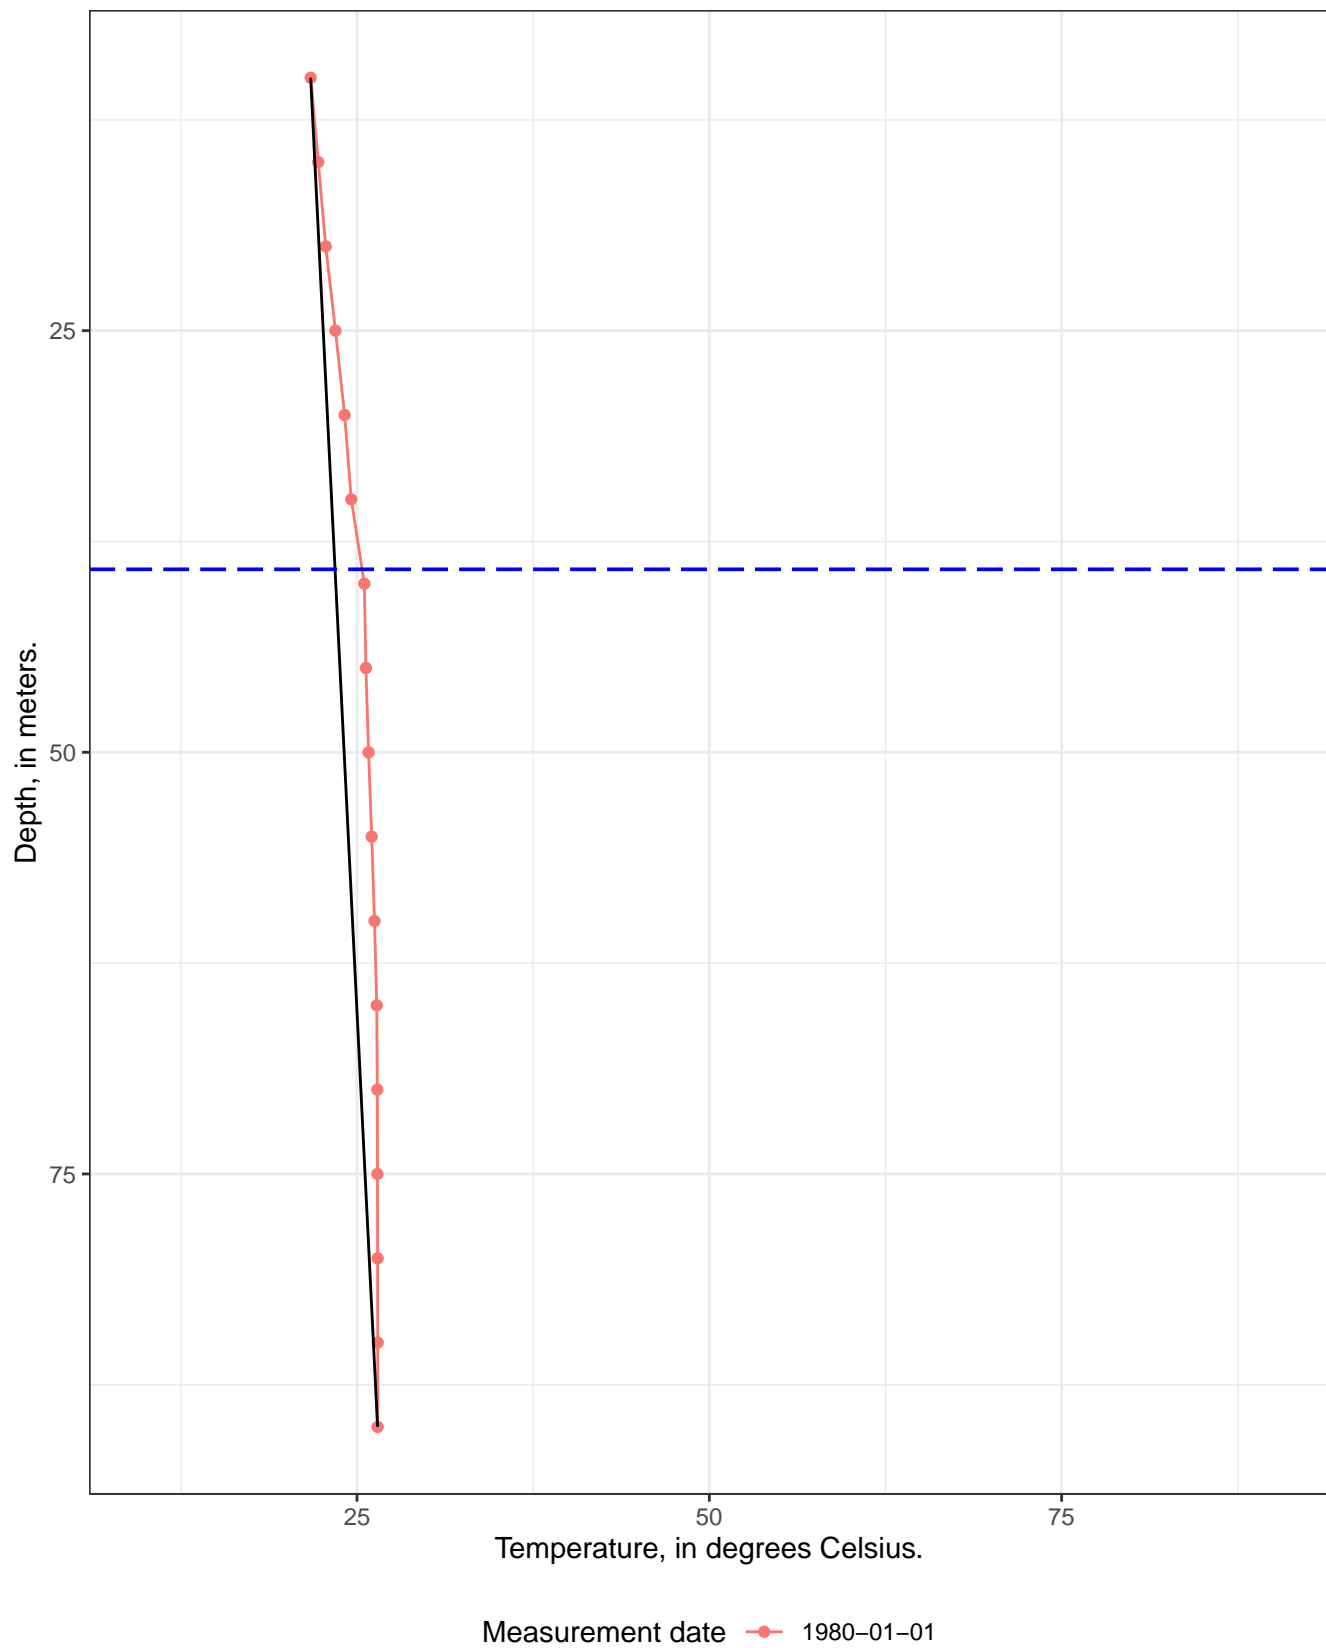

ID: 253 [ST-29]

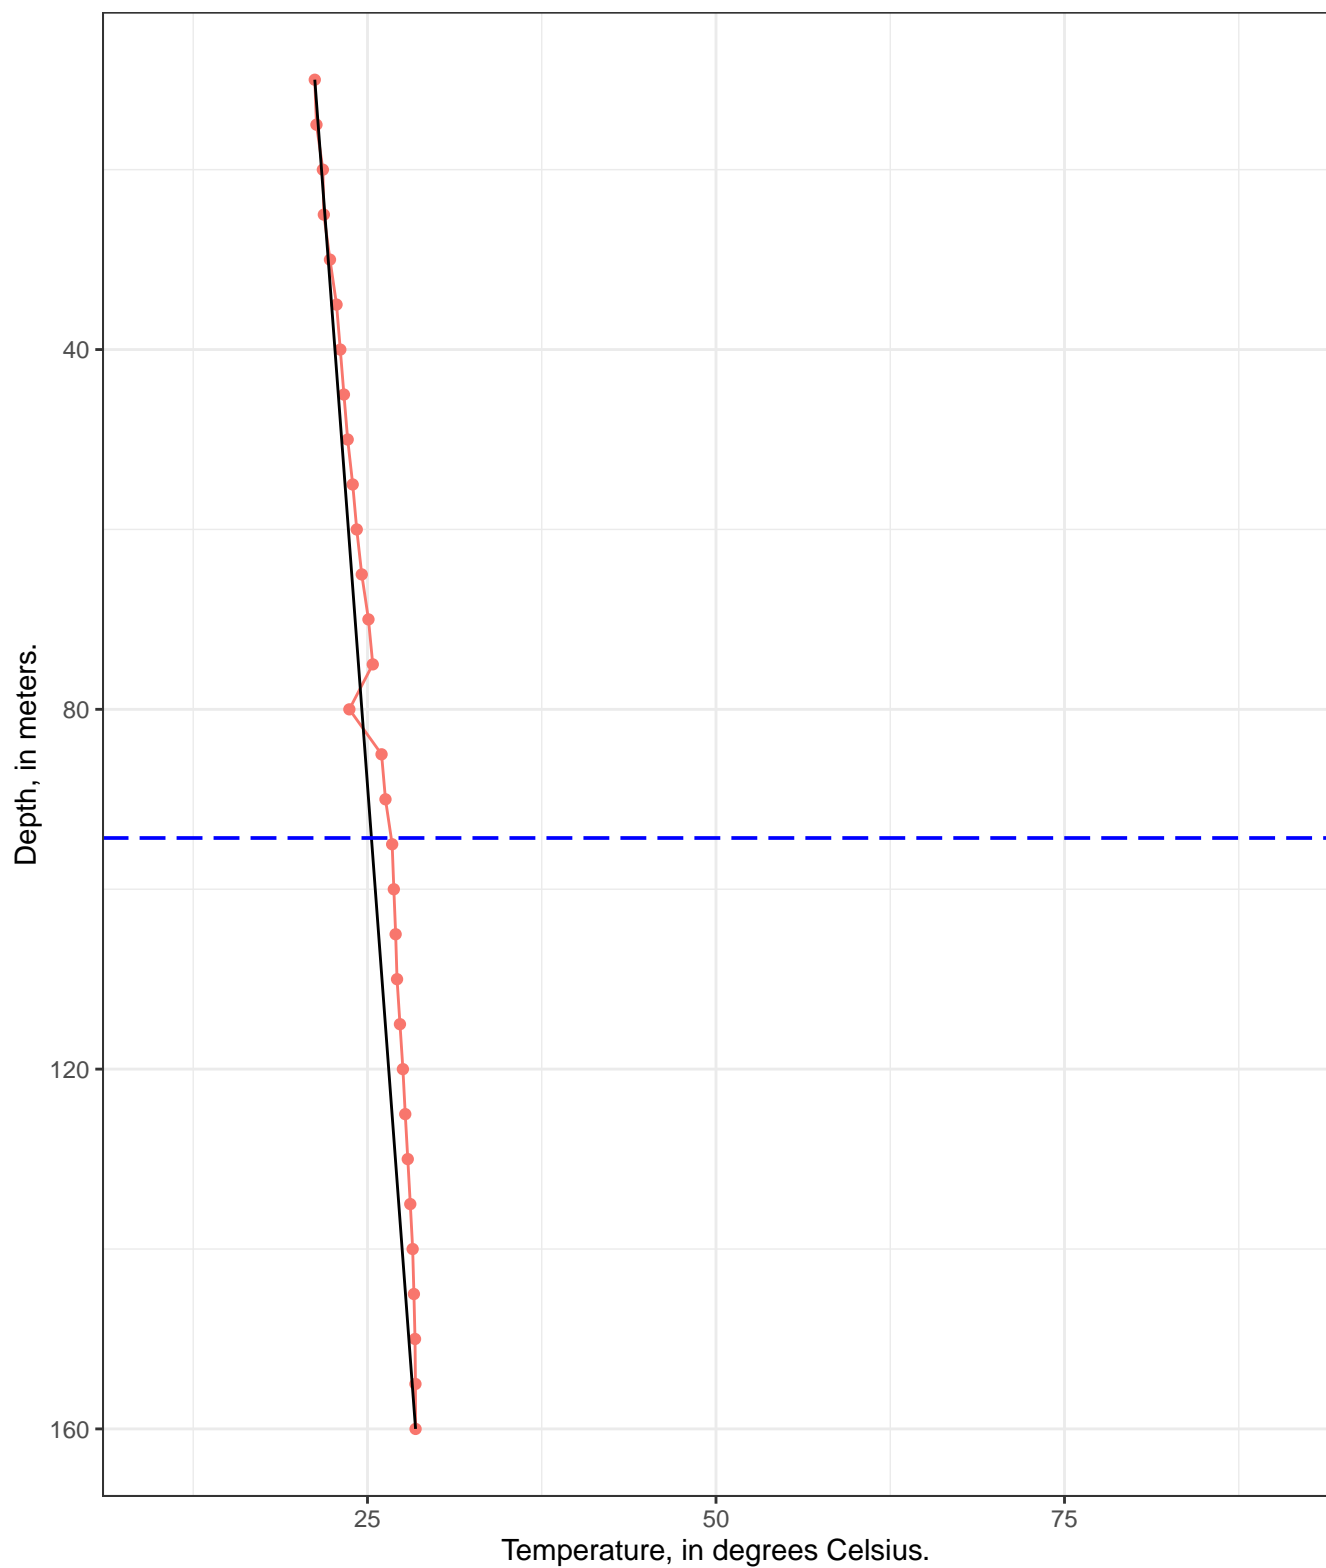

ID: 254 [ST-3]

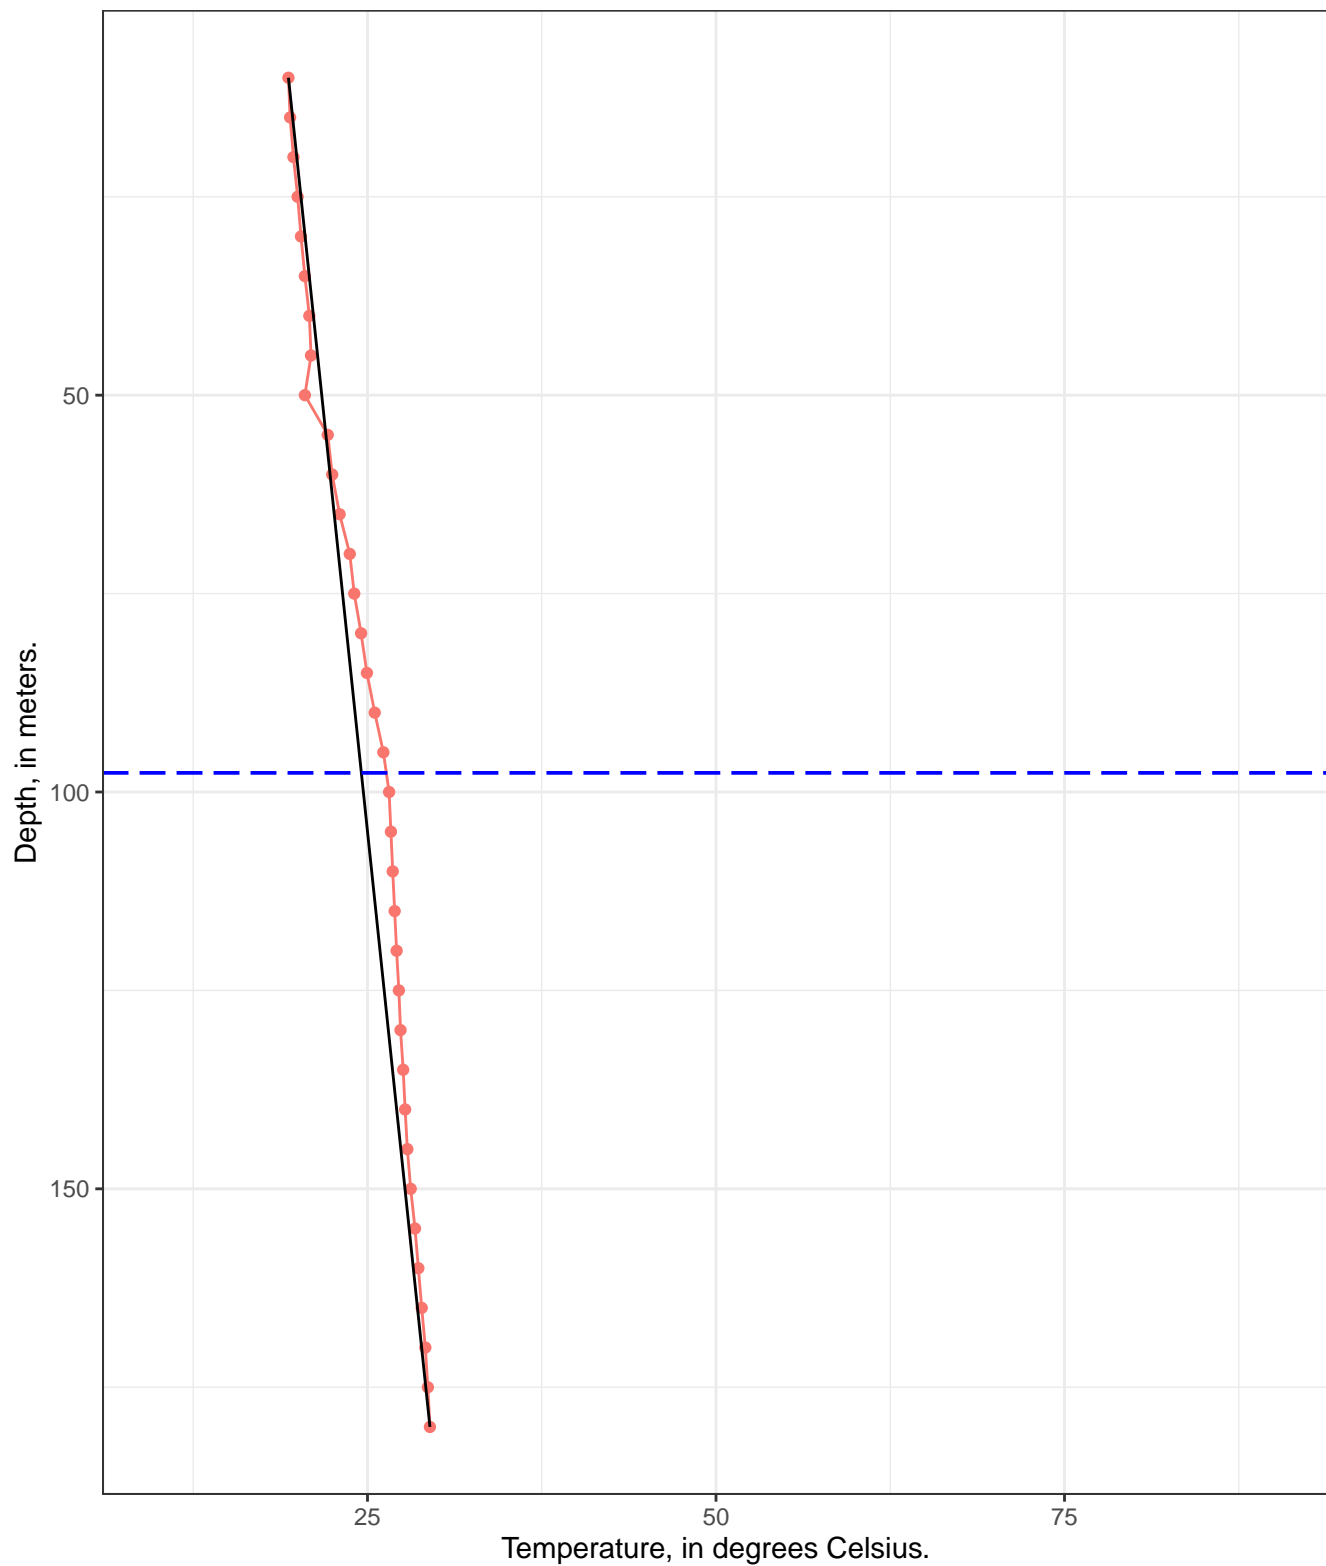

ID: 255 [ST-30]

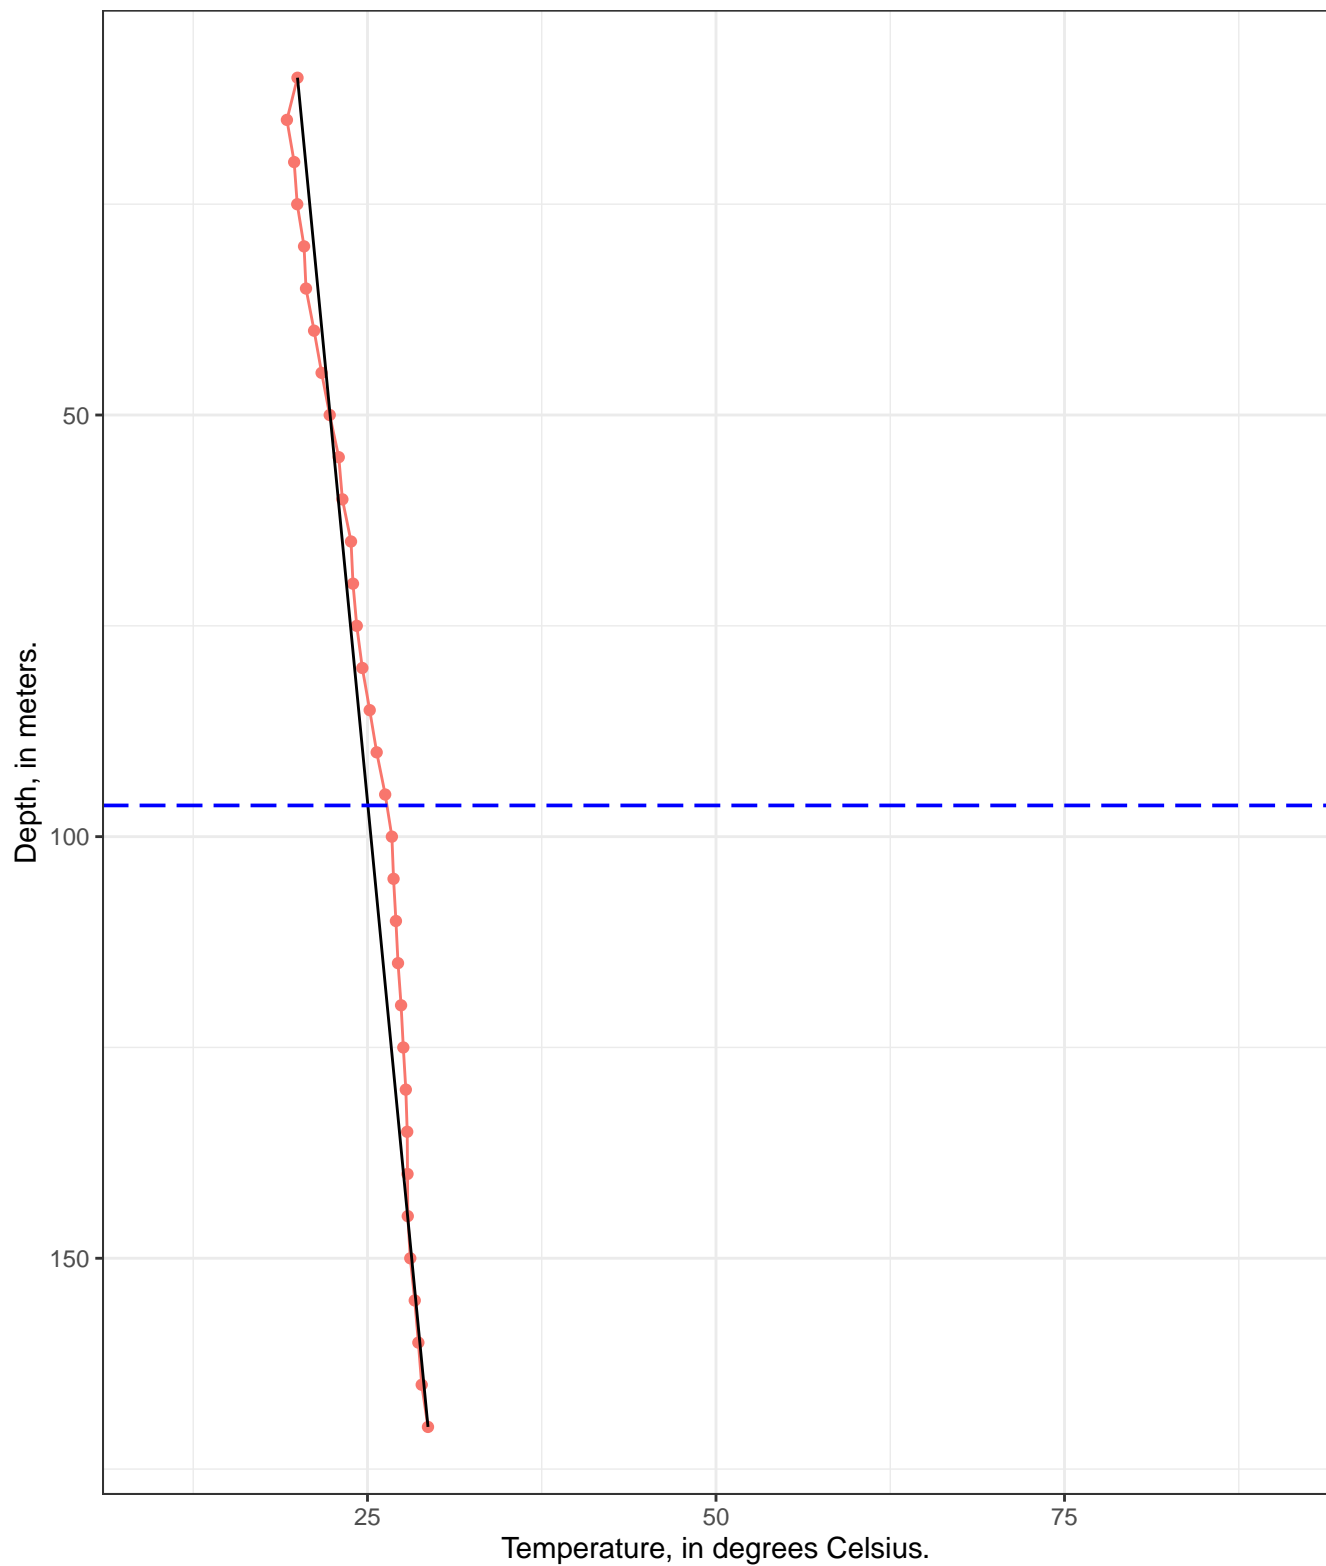



ID: 256 [ST-31]

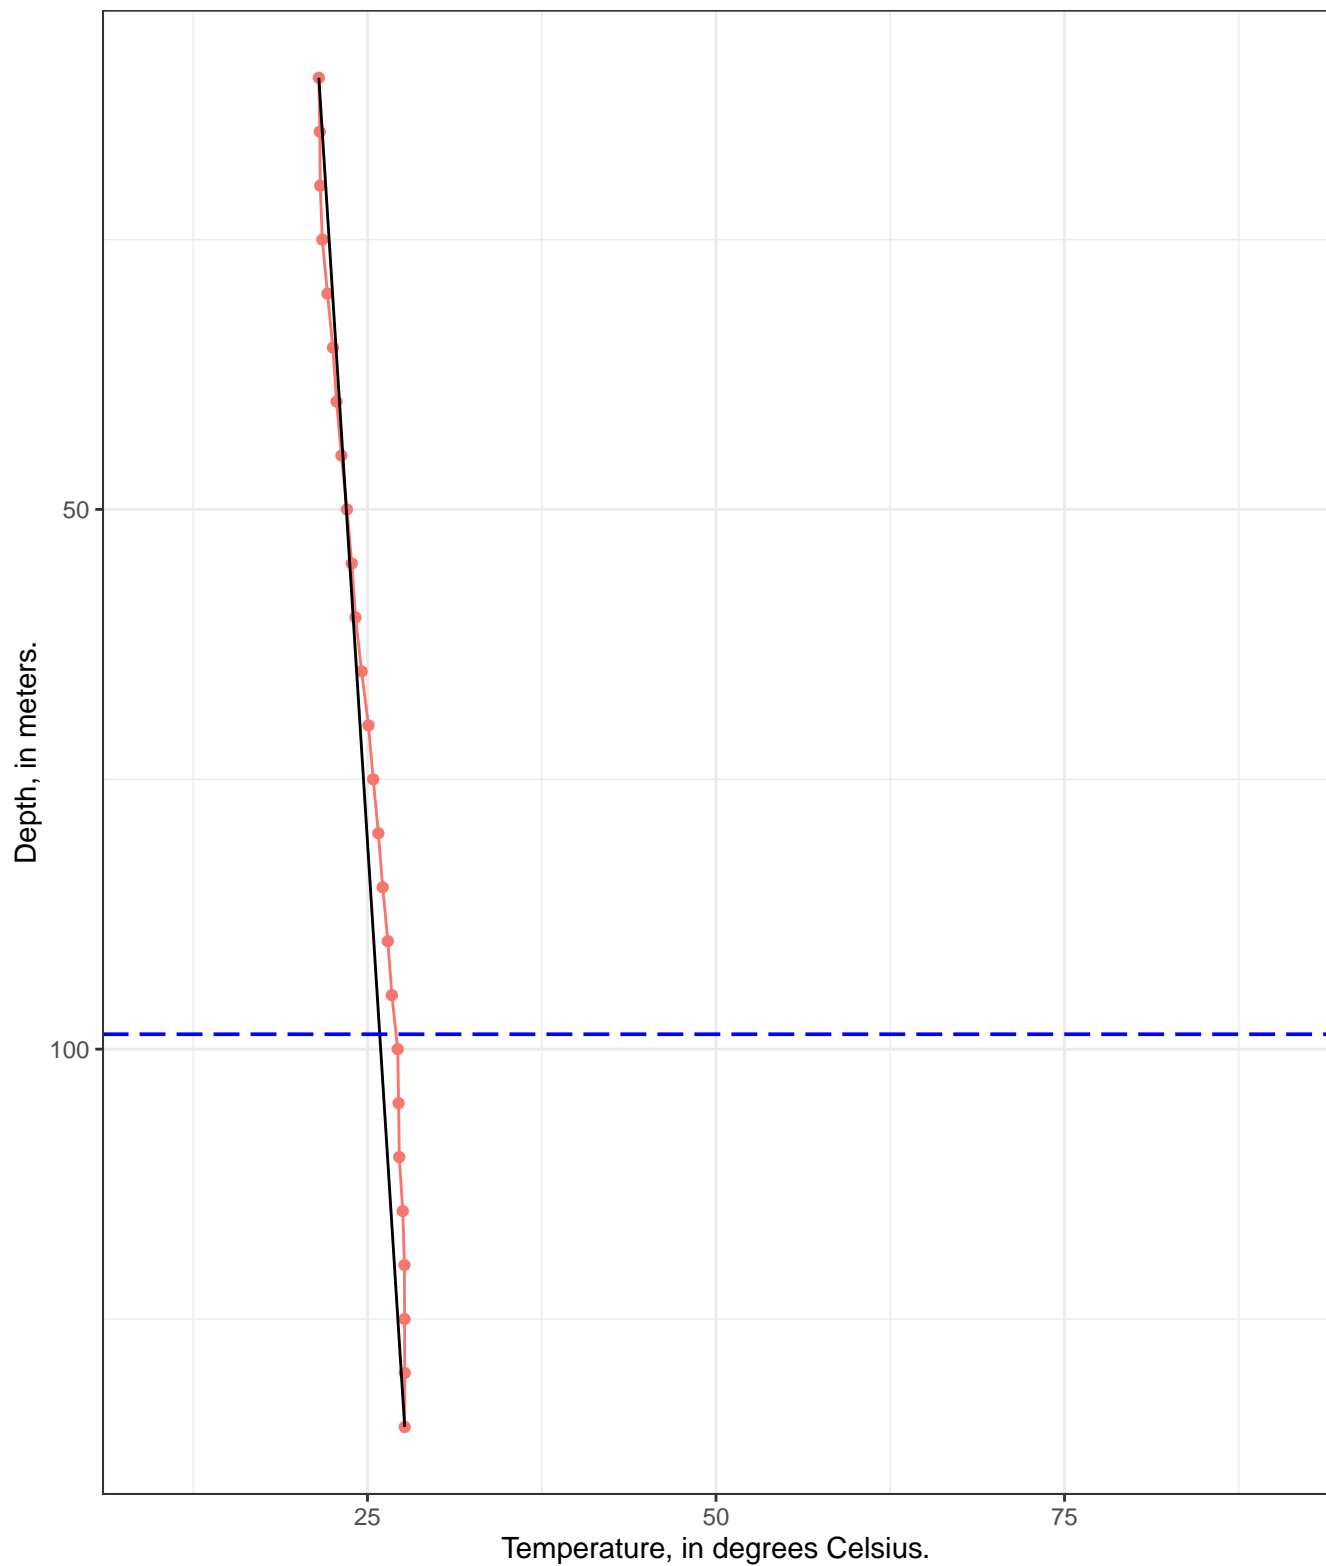

ID: 257 [ST-5]

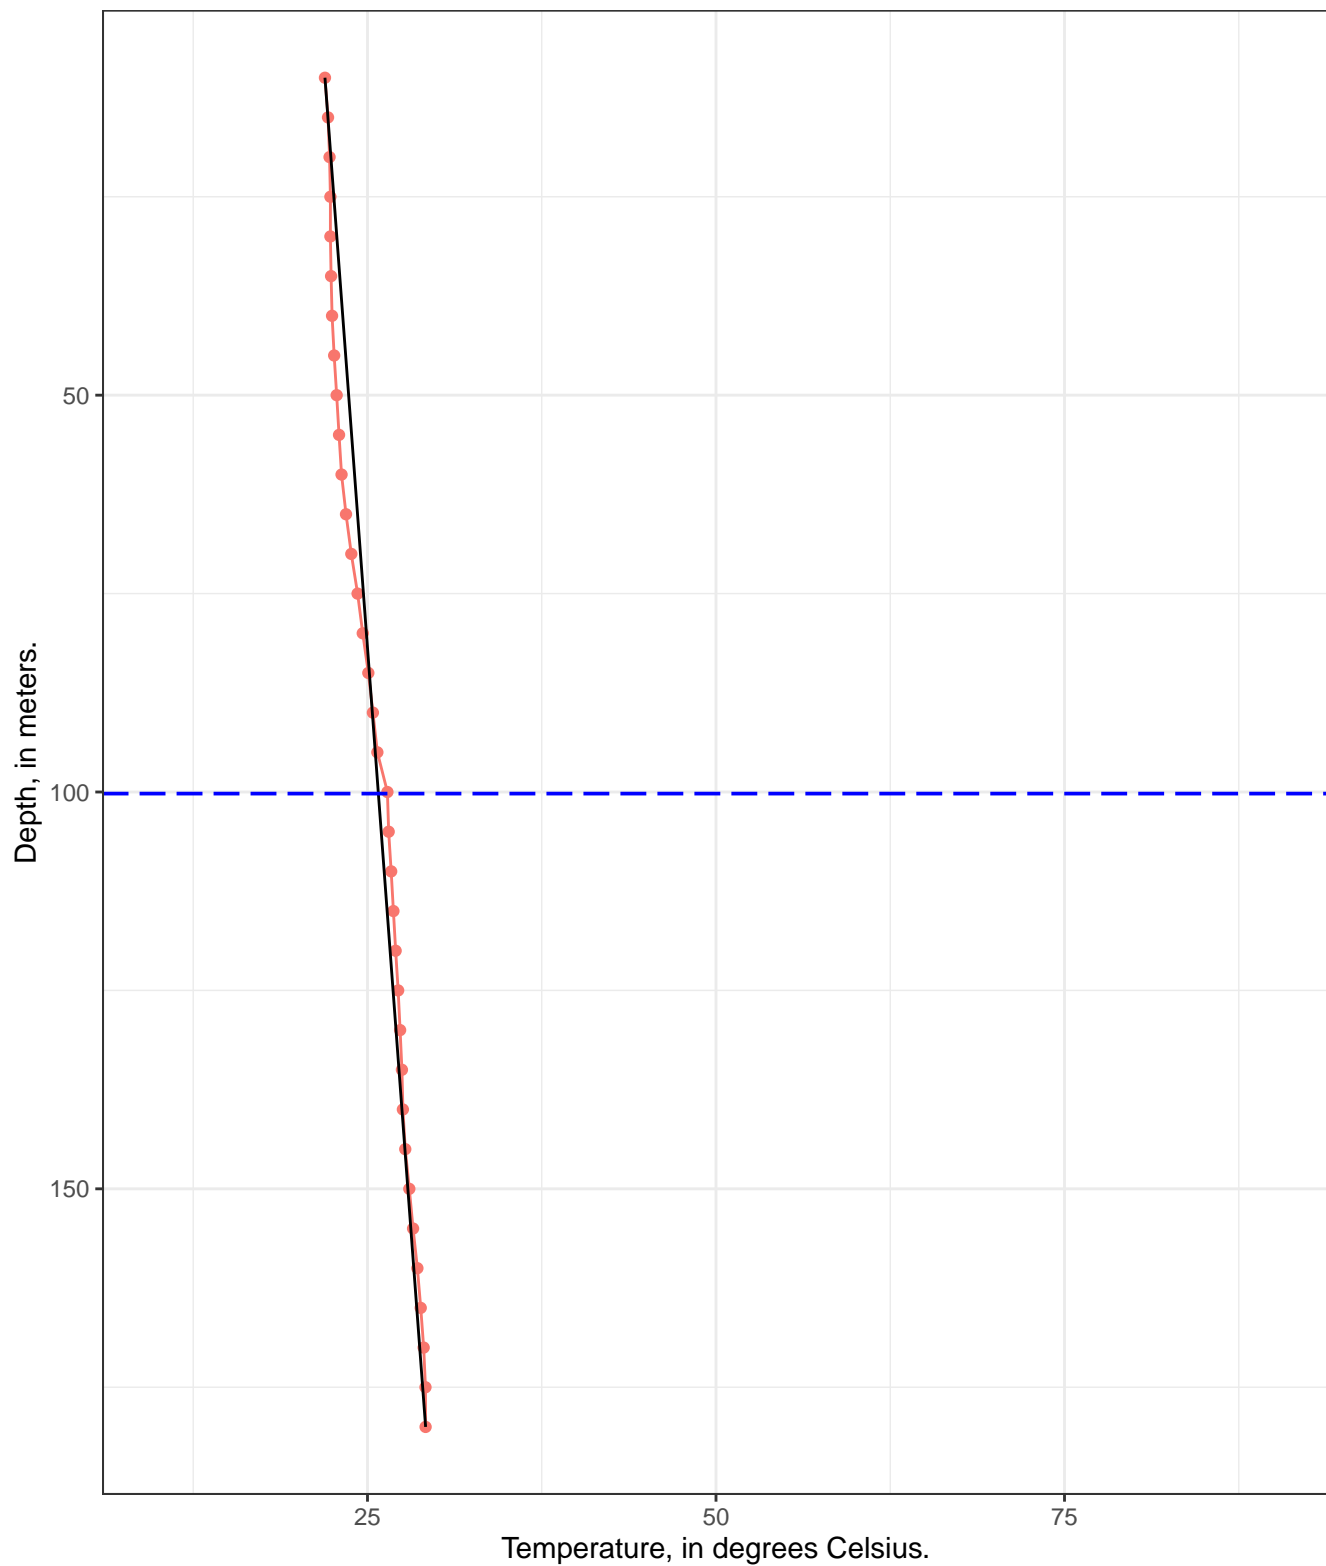

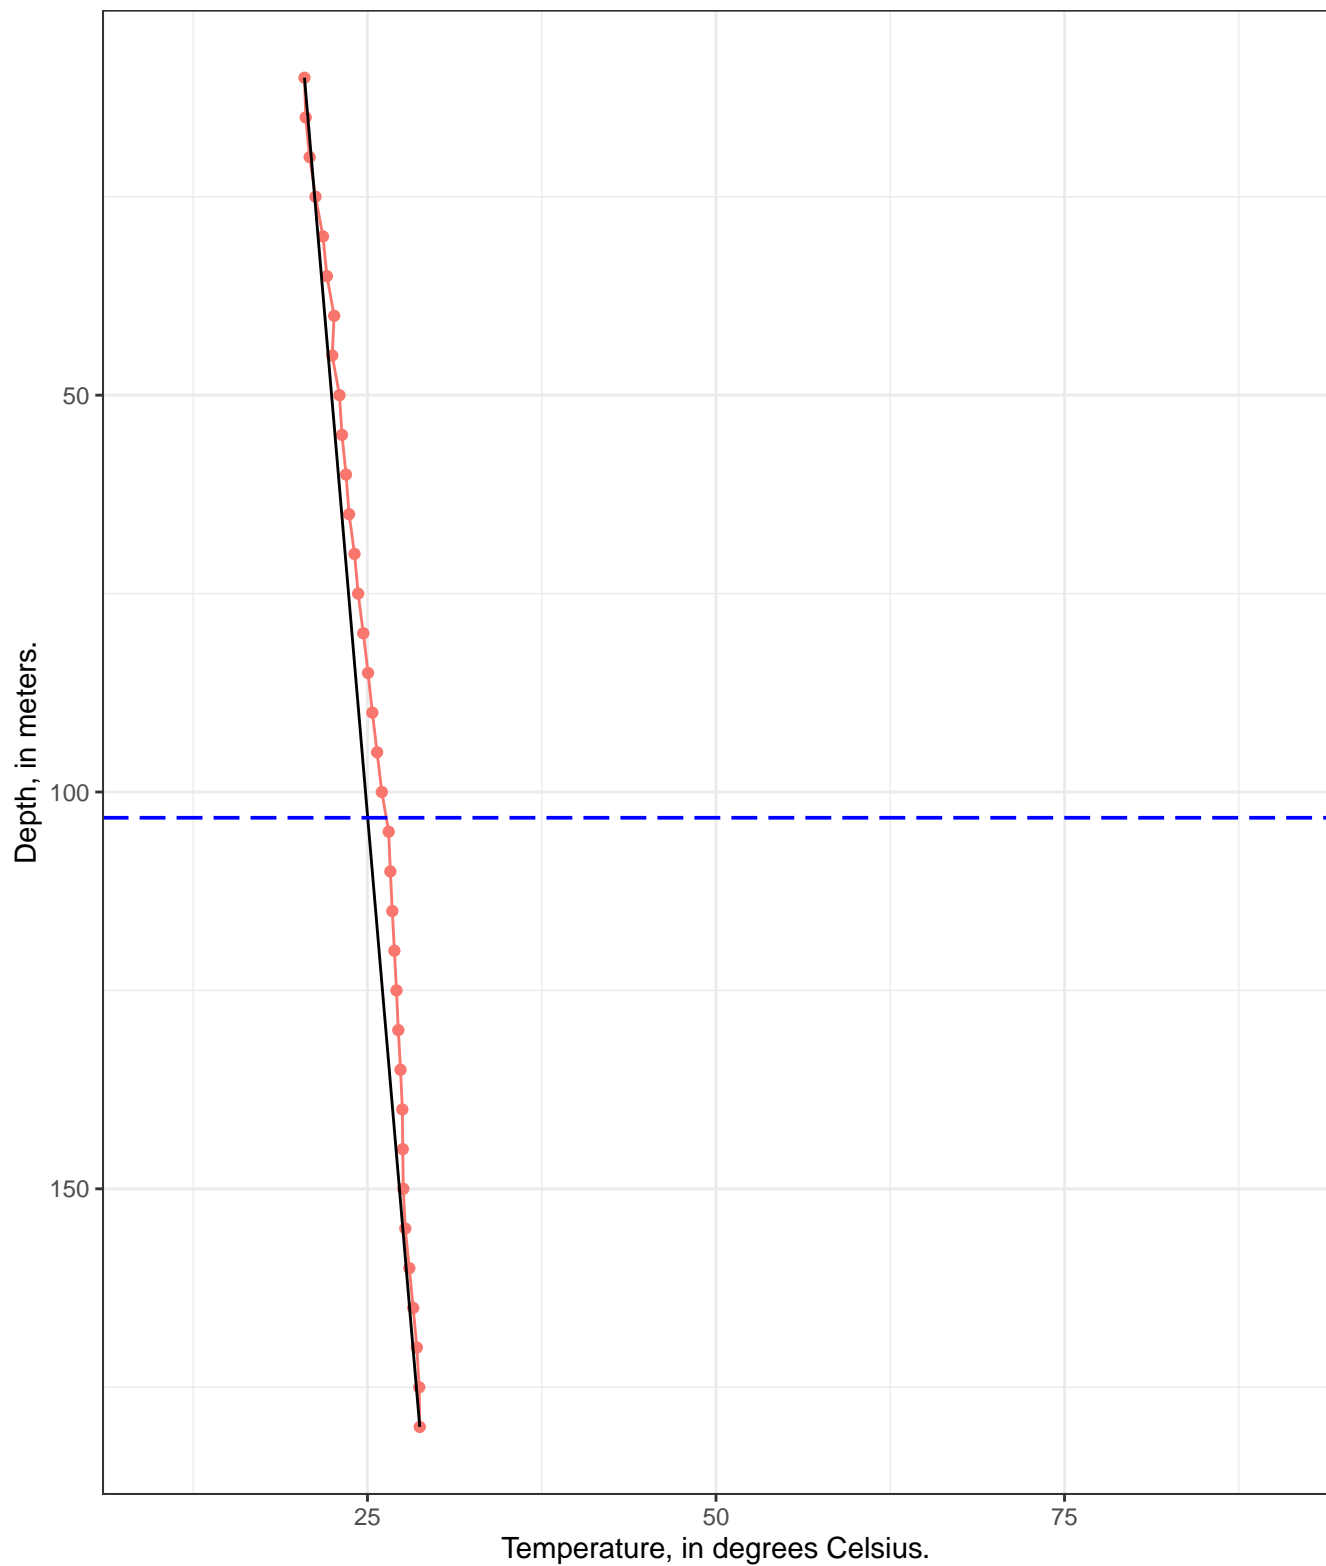

ID: 259 [ST-7]

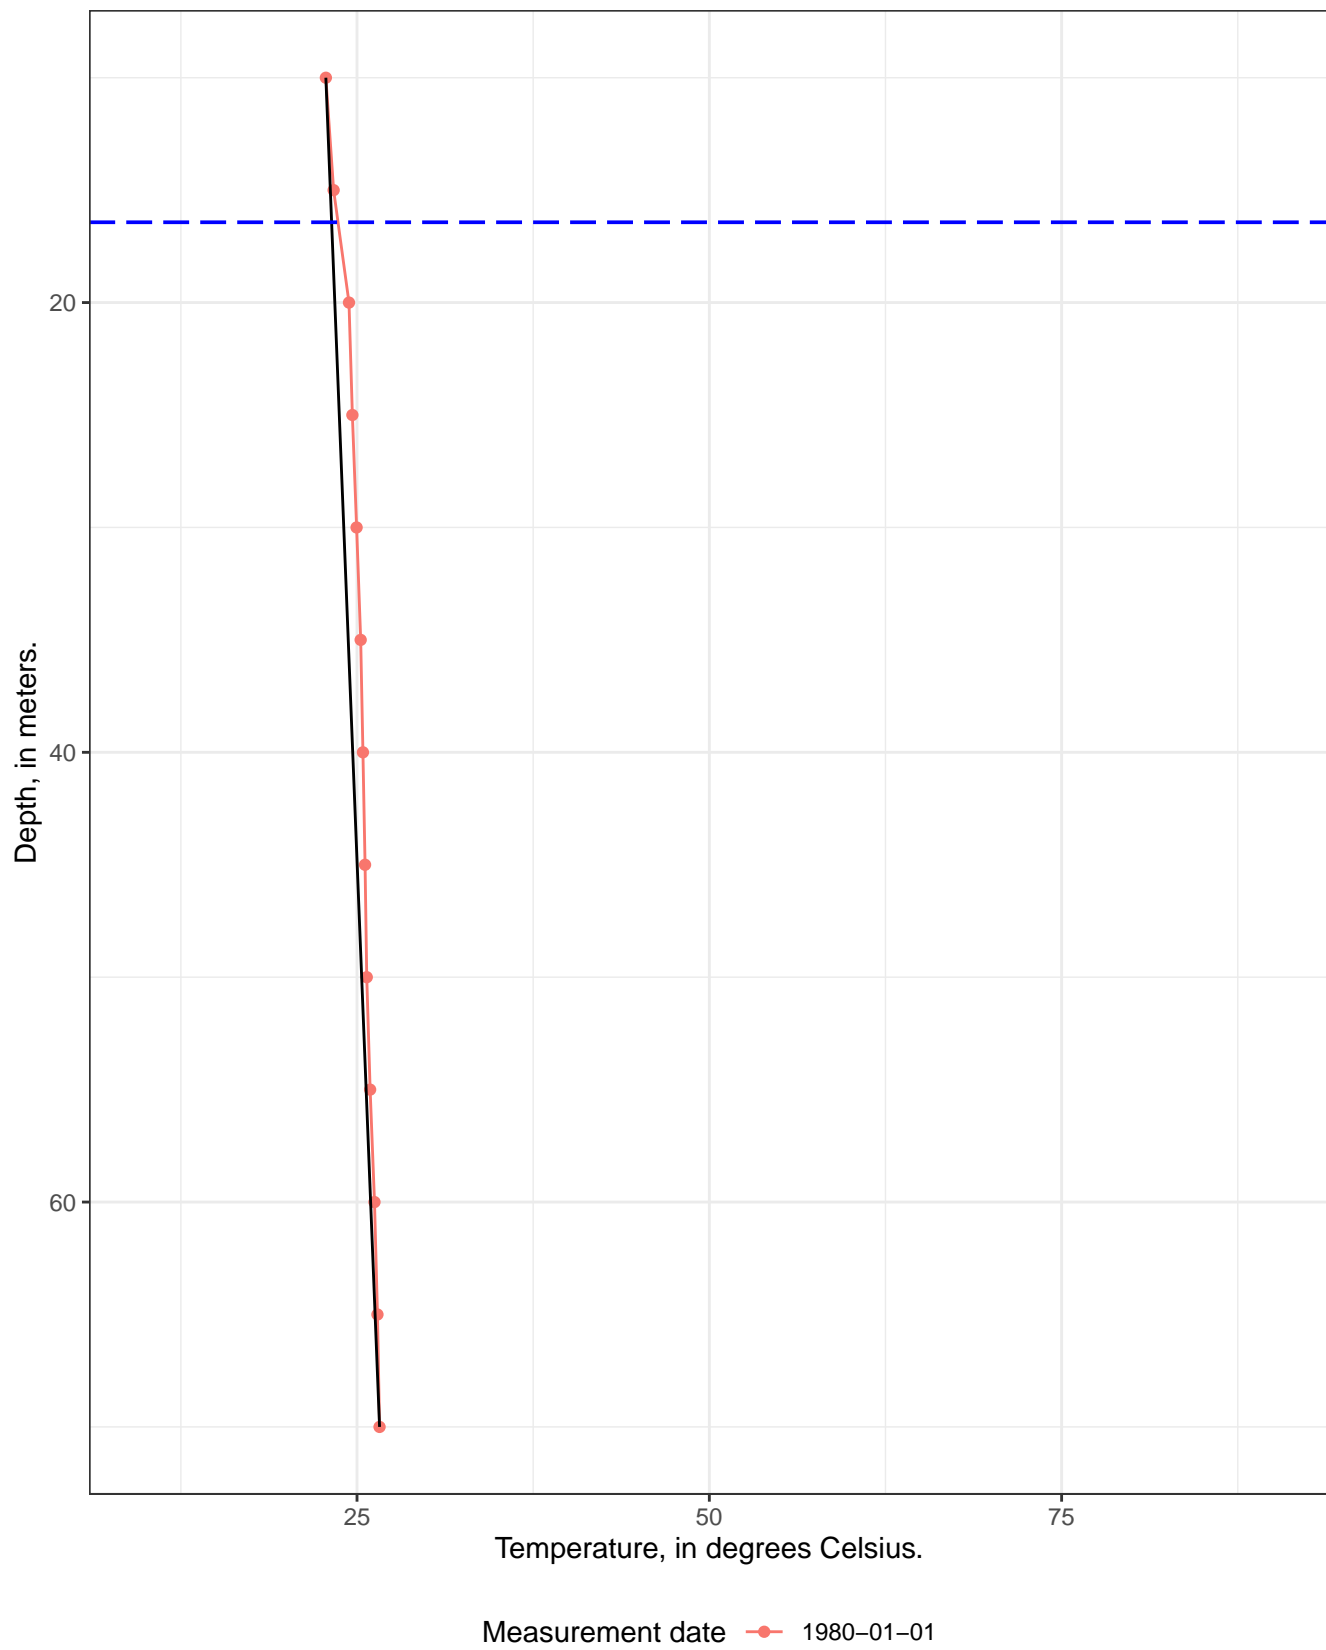

ID: 260 [ST-9]

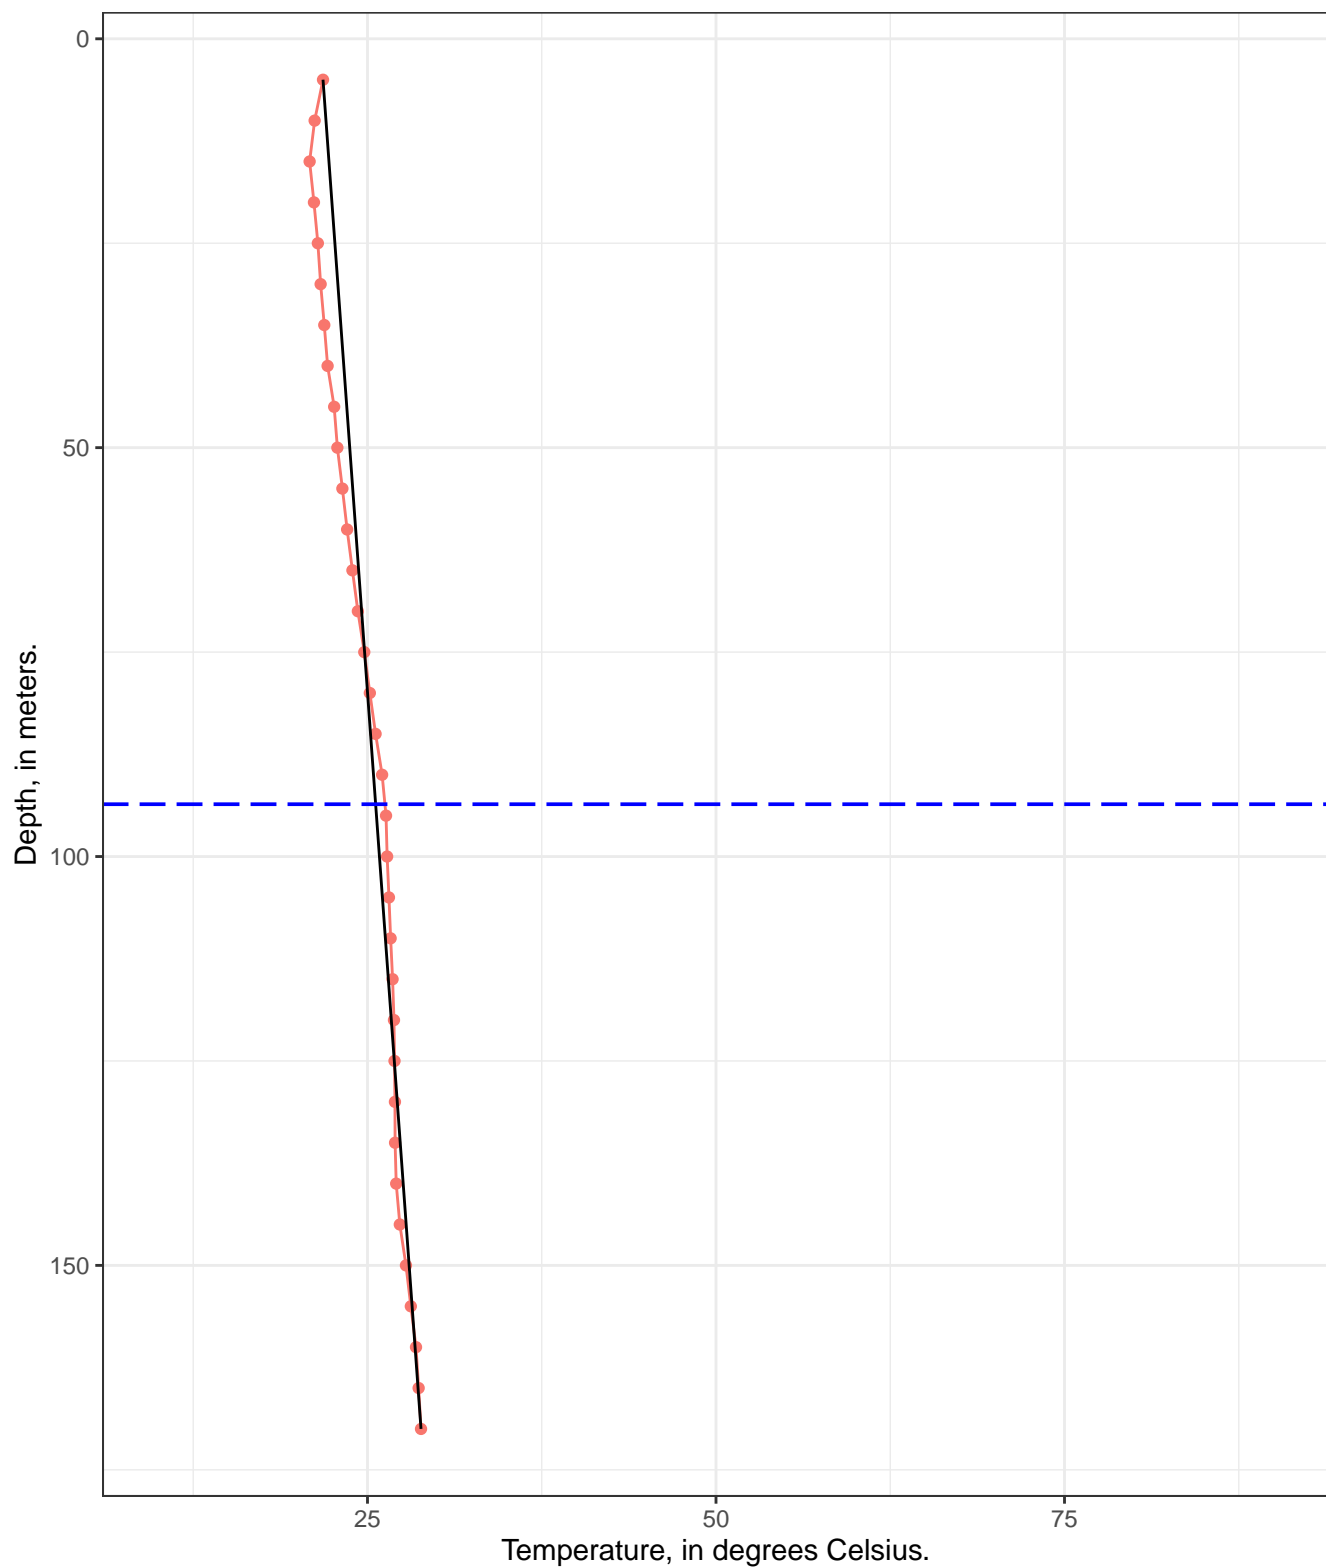

ID: 261 [TG-117\_NMSUEI]

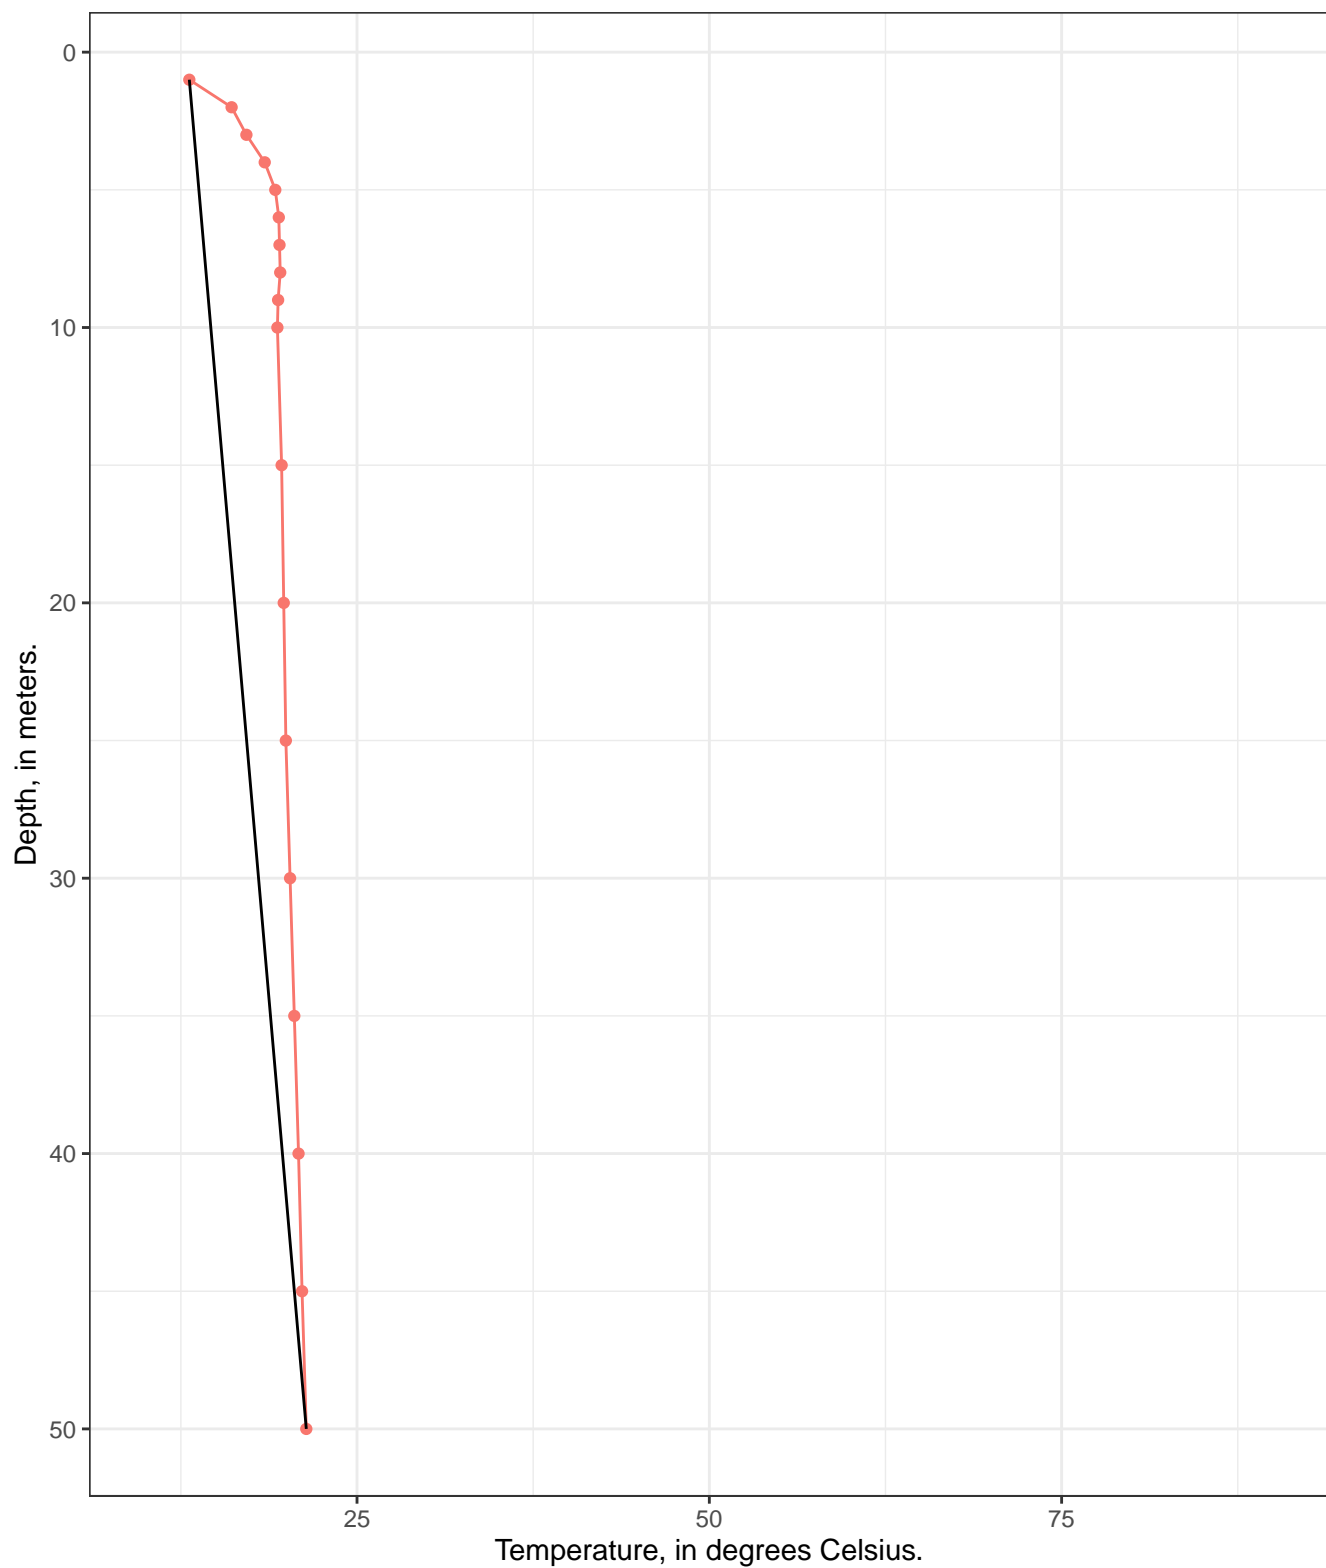

Measurement date 1984-01-10

ID: 262 [TG-118\_NMSUEI]

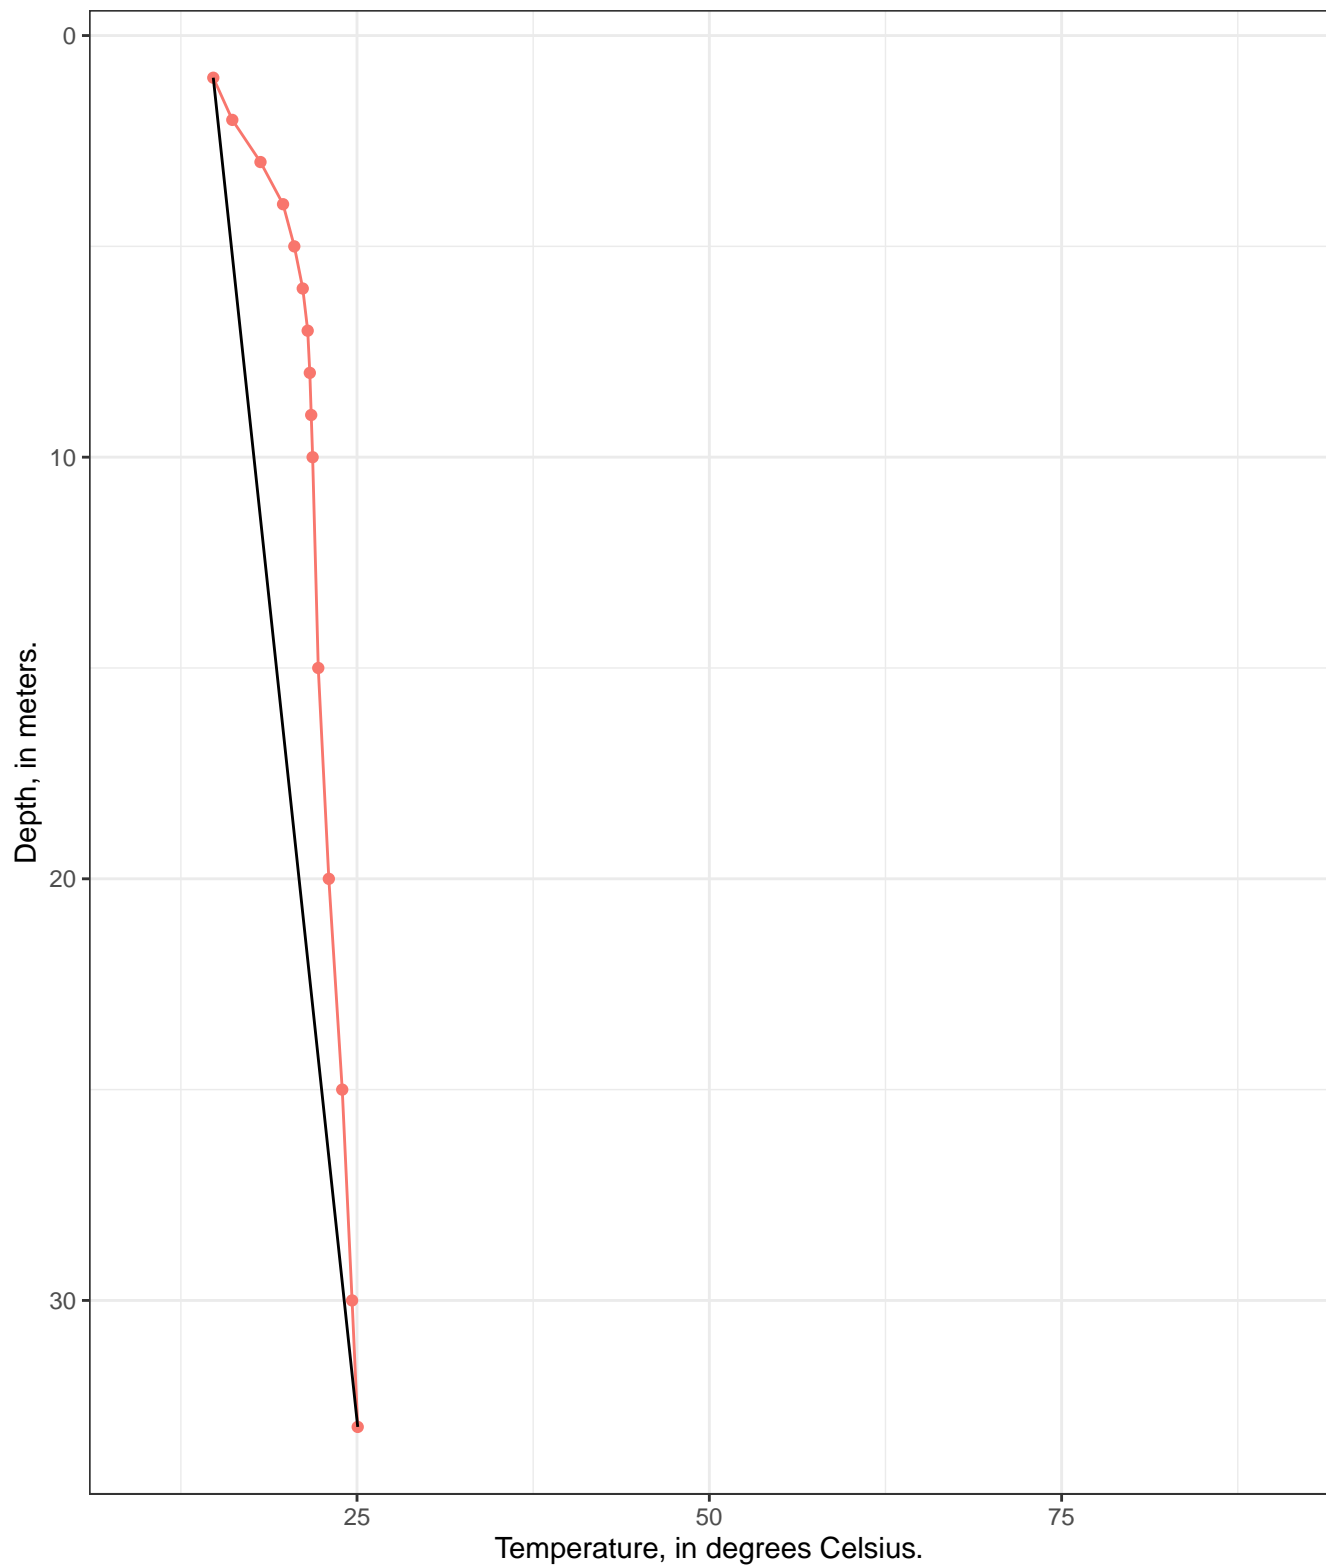

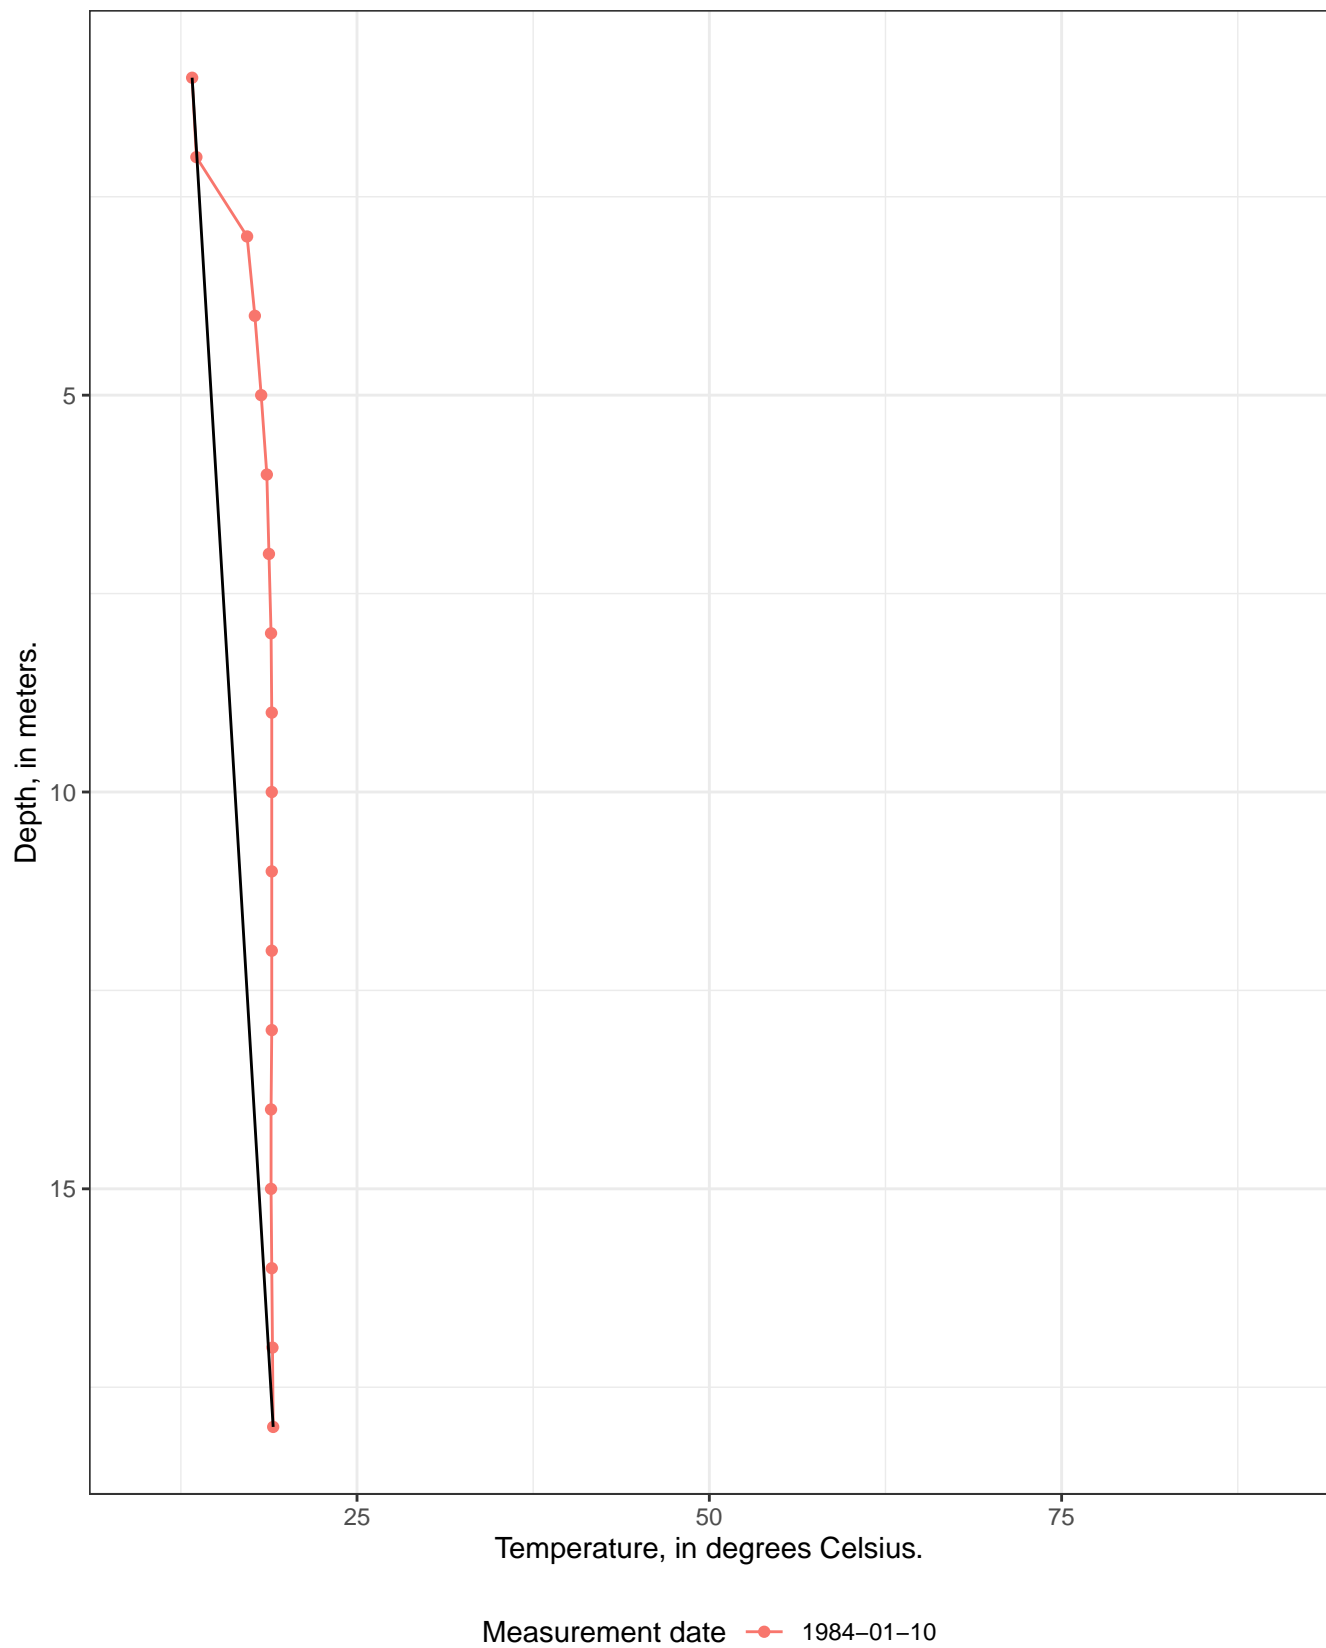



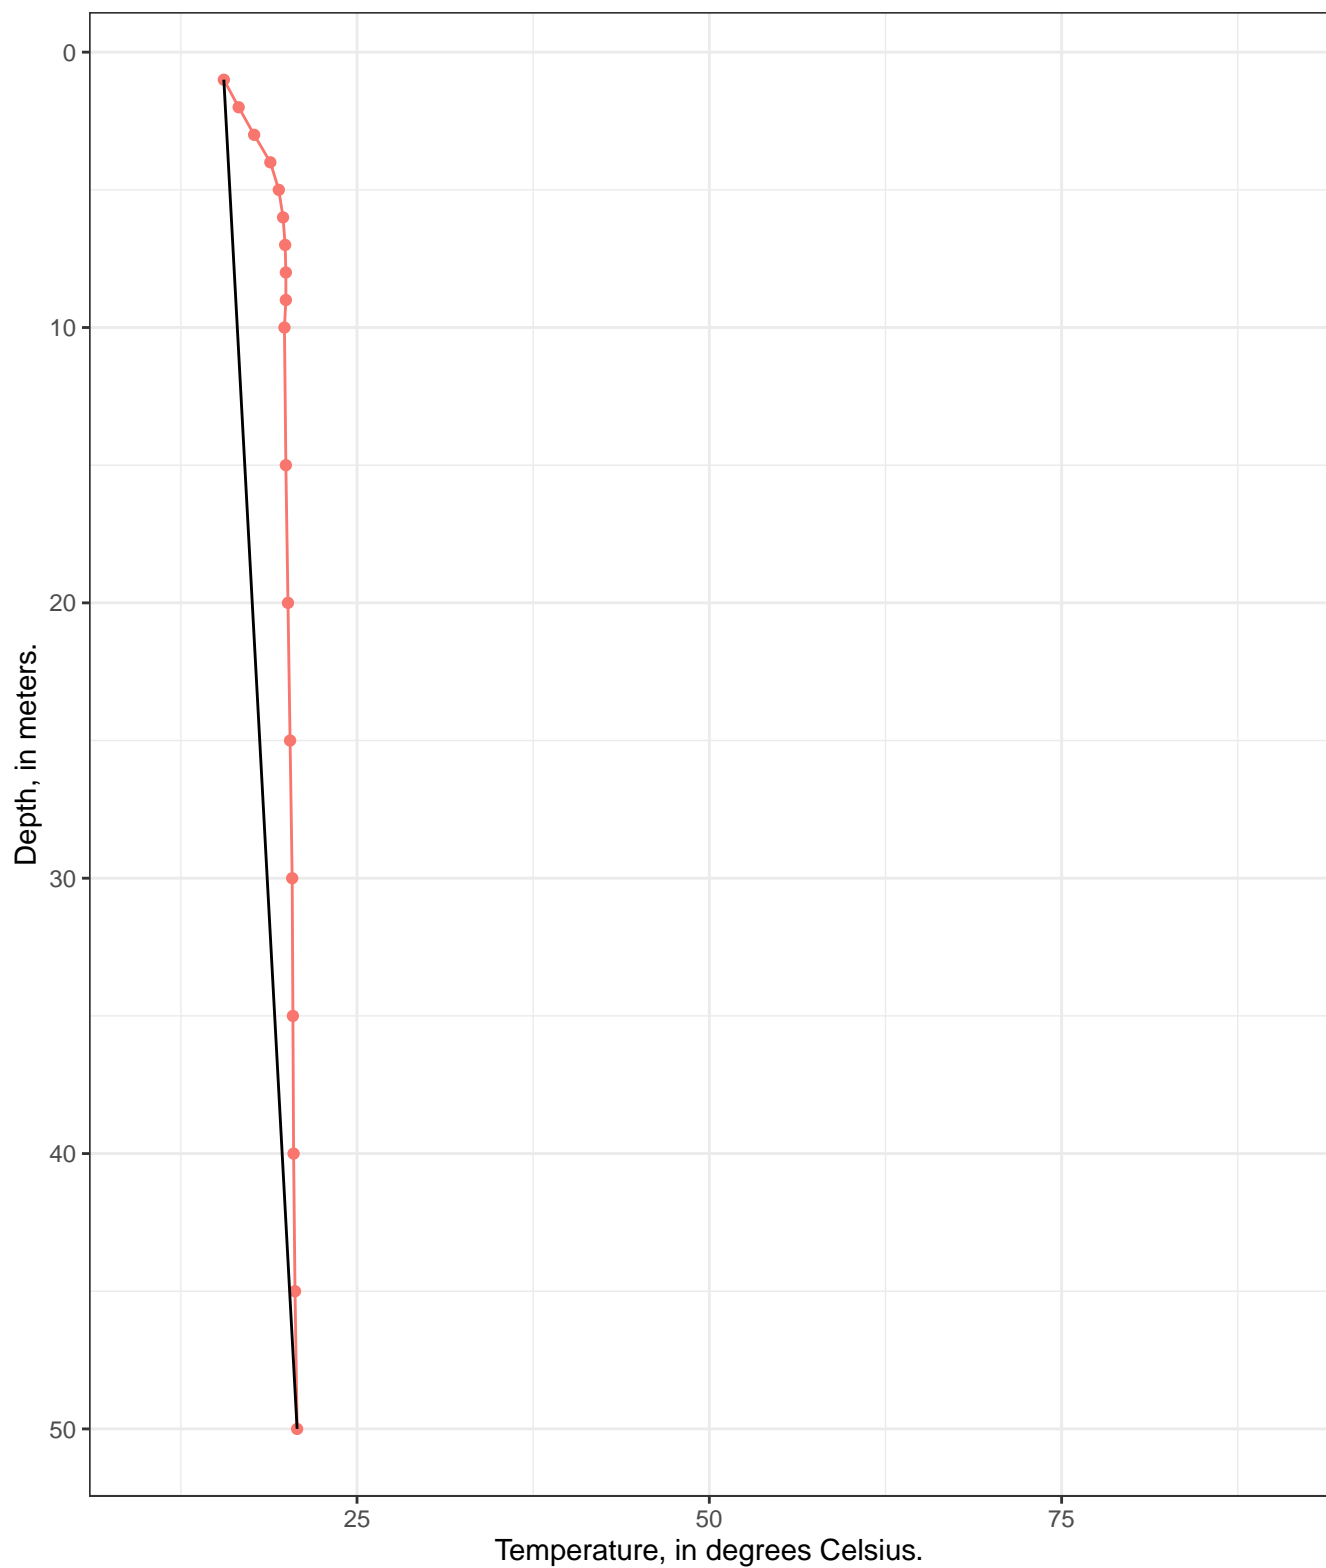

ID: 265 [TG-123\_NMSUEI]

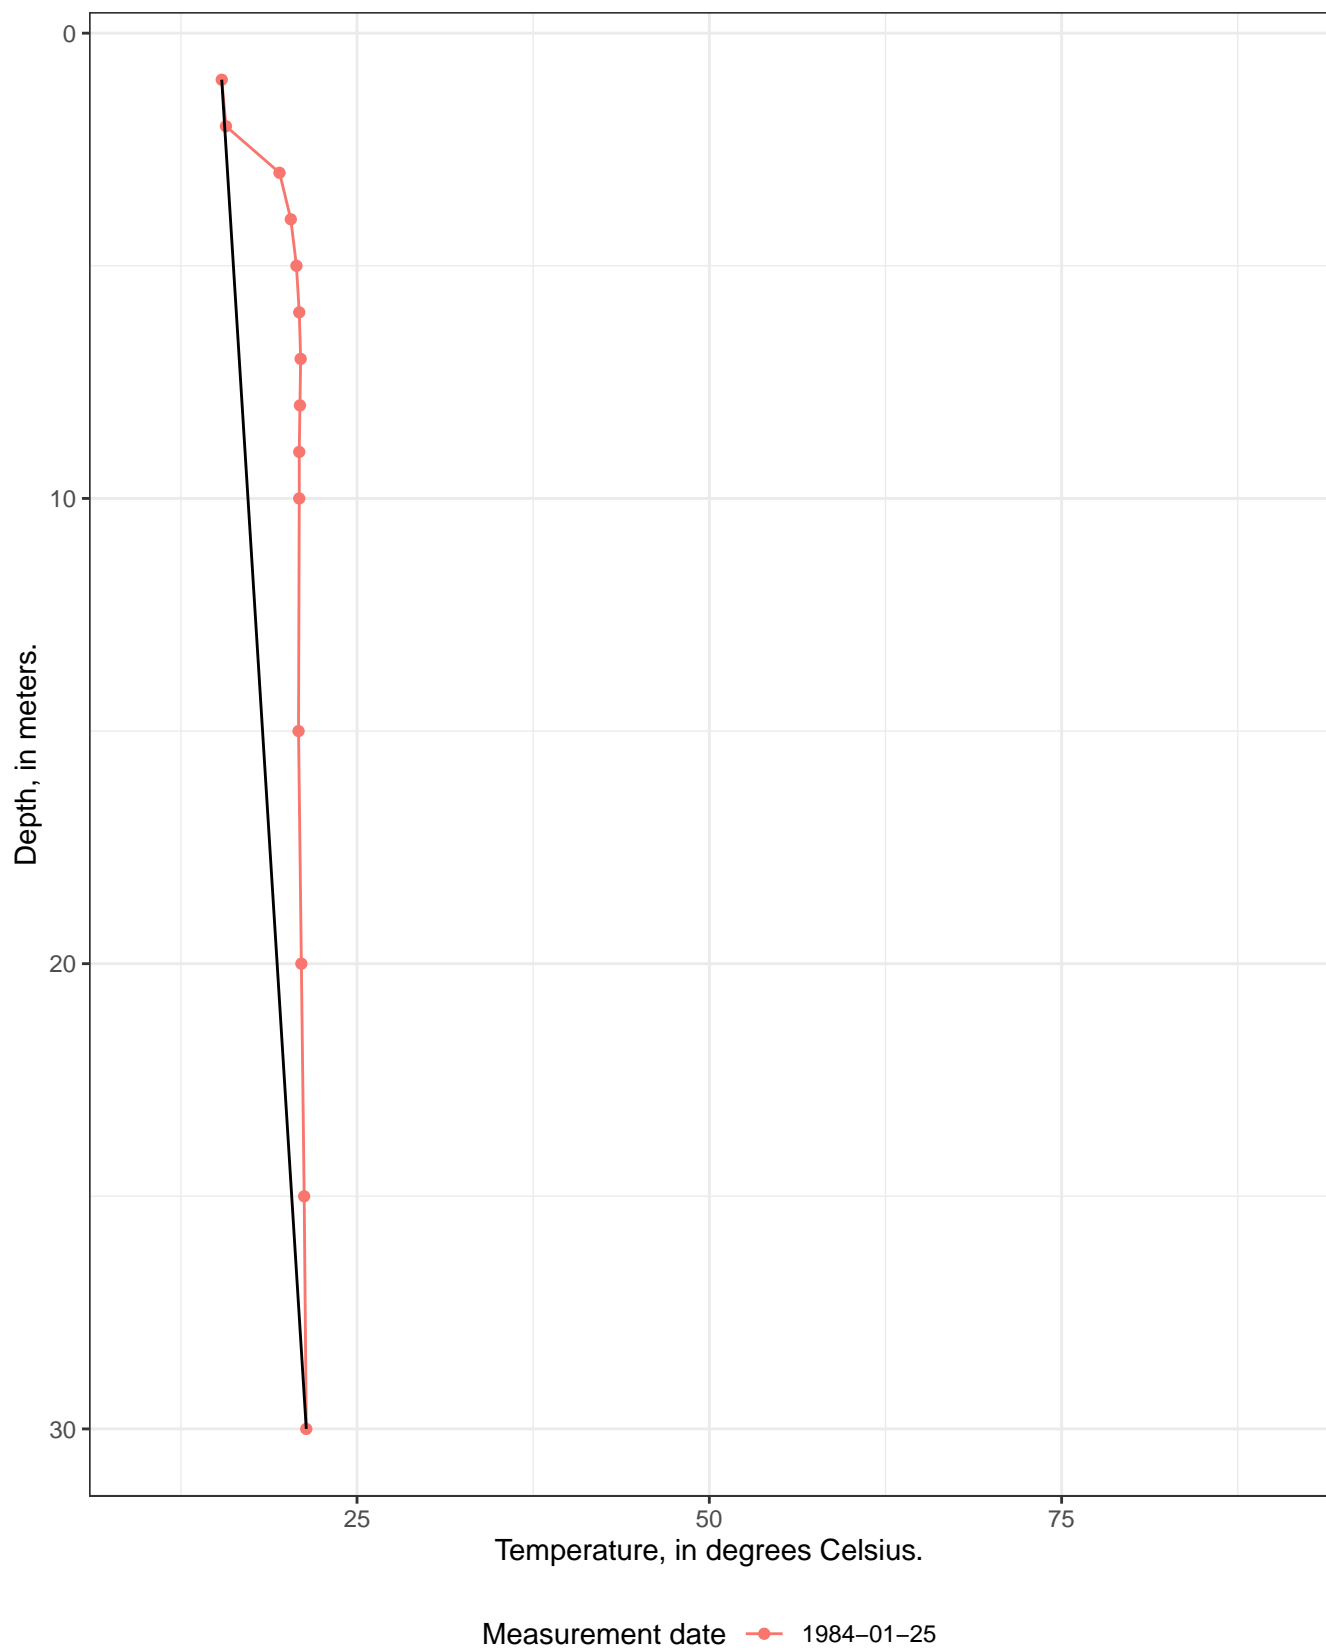

ID: 266 [TG-124\_NMSUEI]

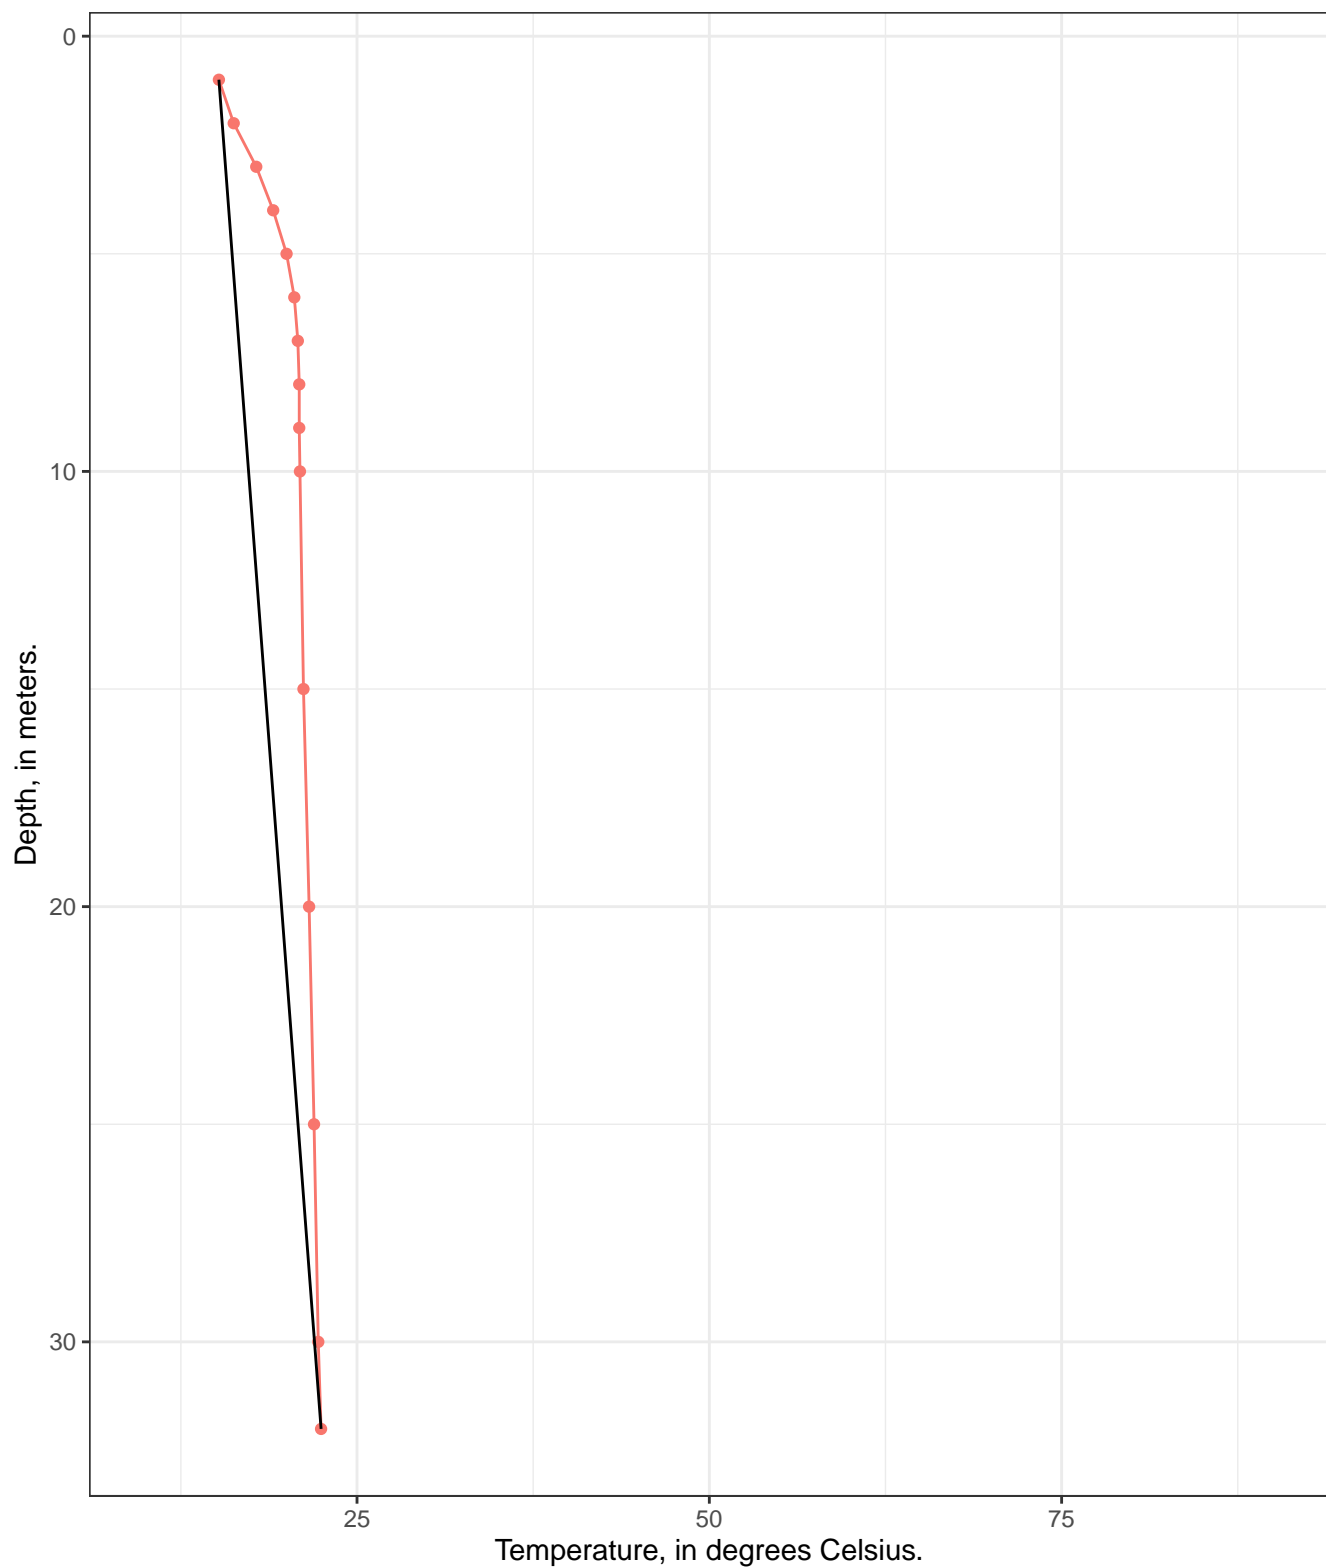

Measurement date 1984-01-26

ID: 267 [TG-125\_NMSUEI]

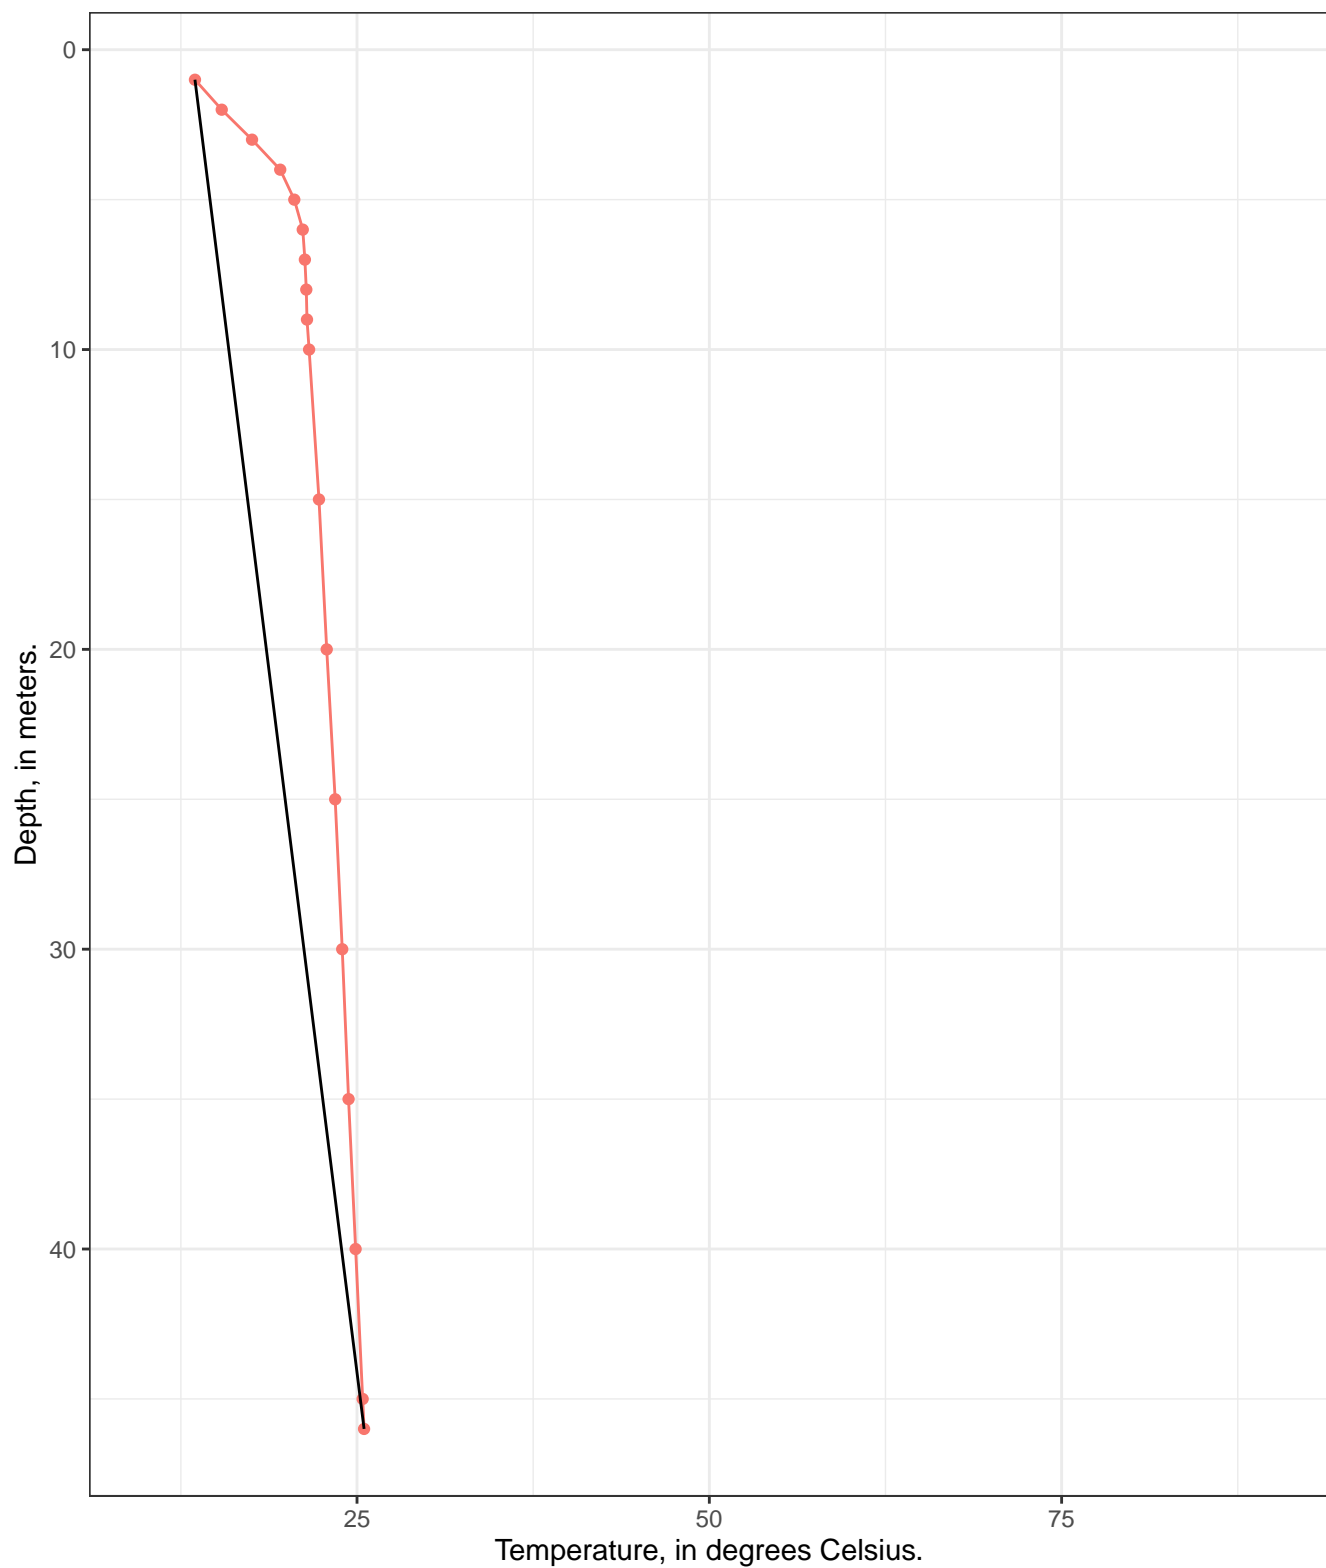

Measurement date 1984-01-25

ID: 268 [TG-126\_NMSUEI]

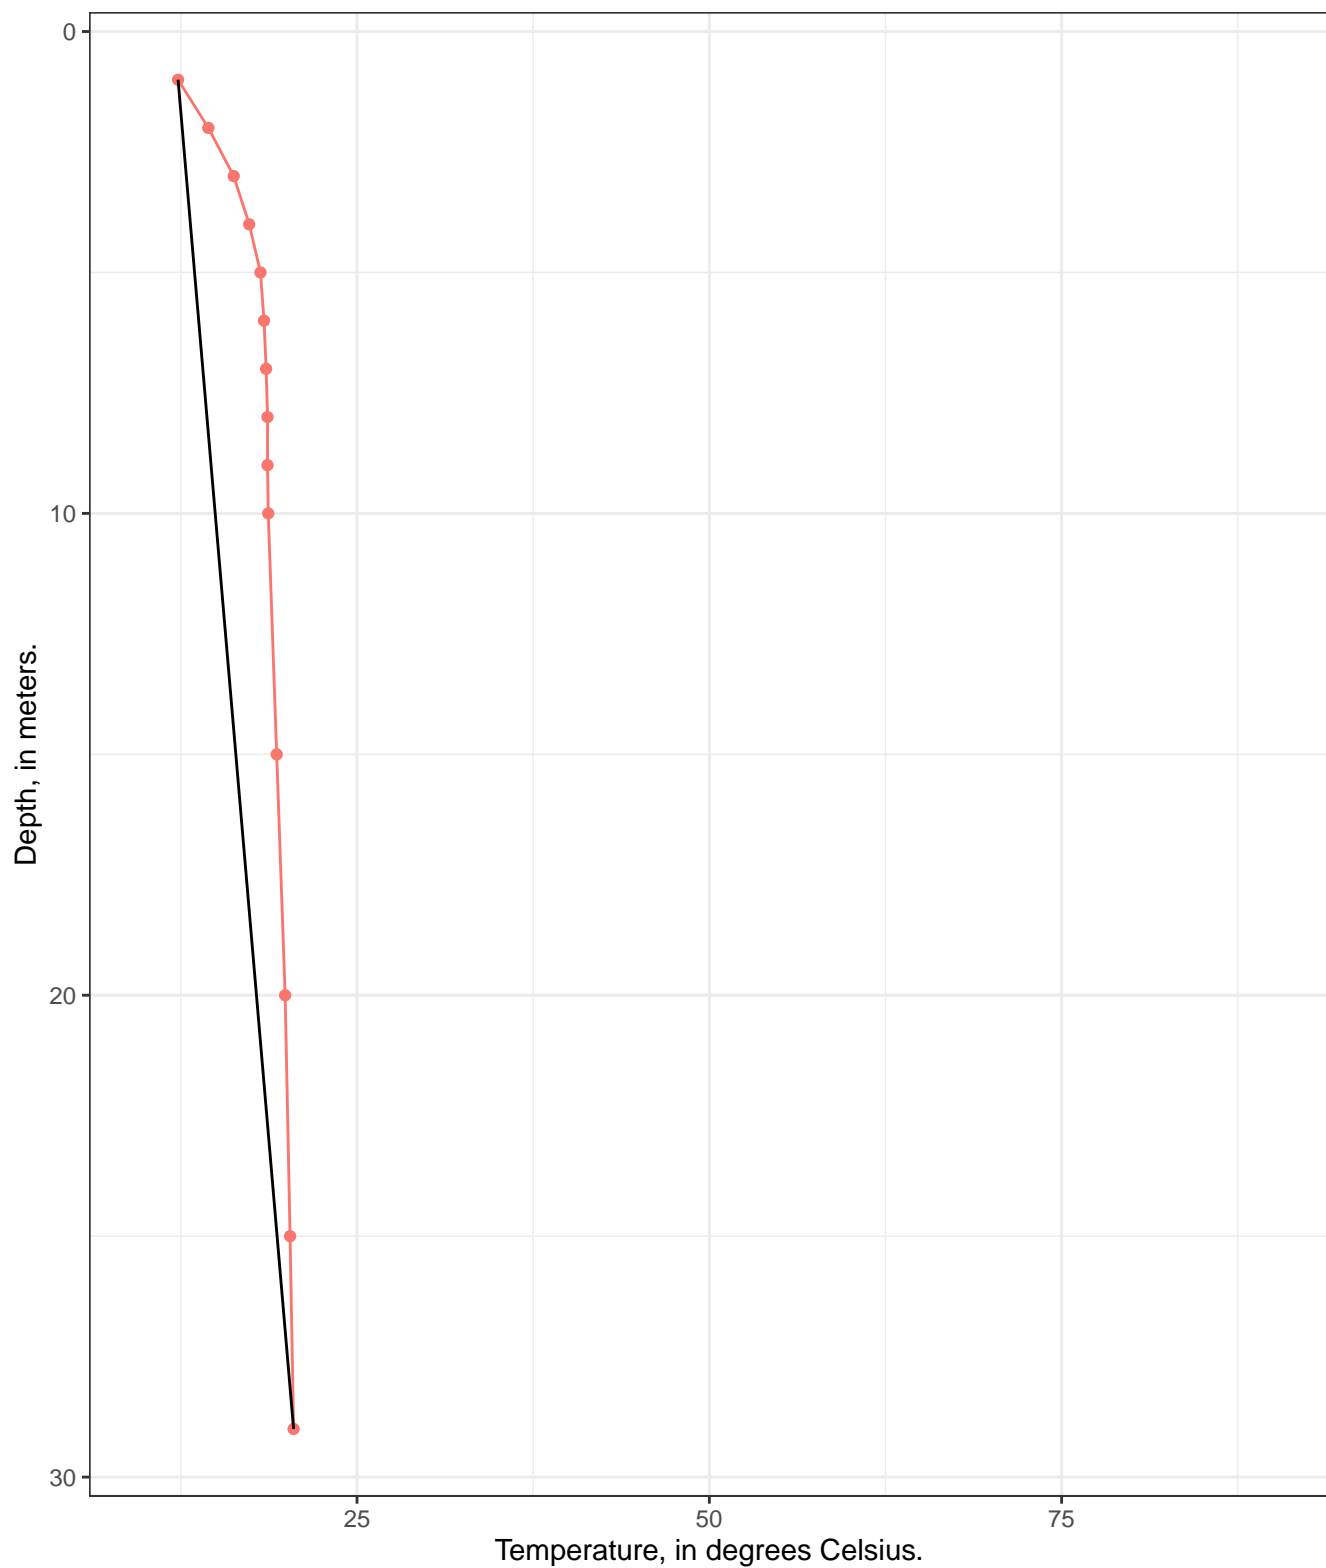

ID: 269 [TG-127\_NMSUEI]

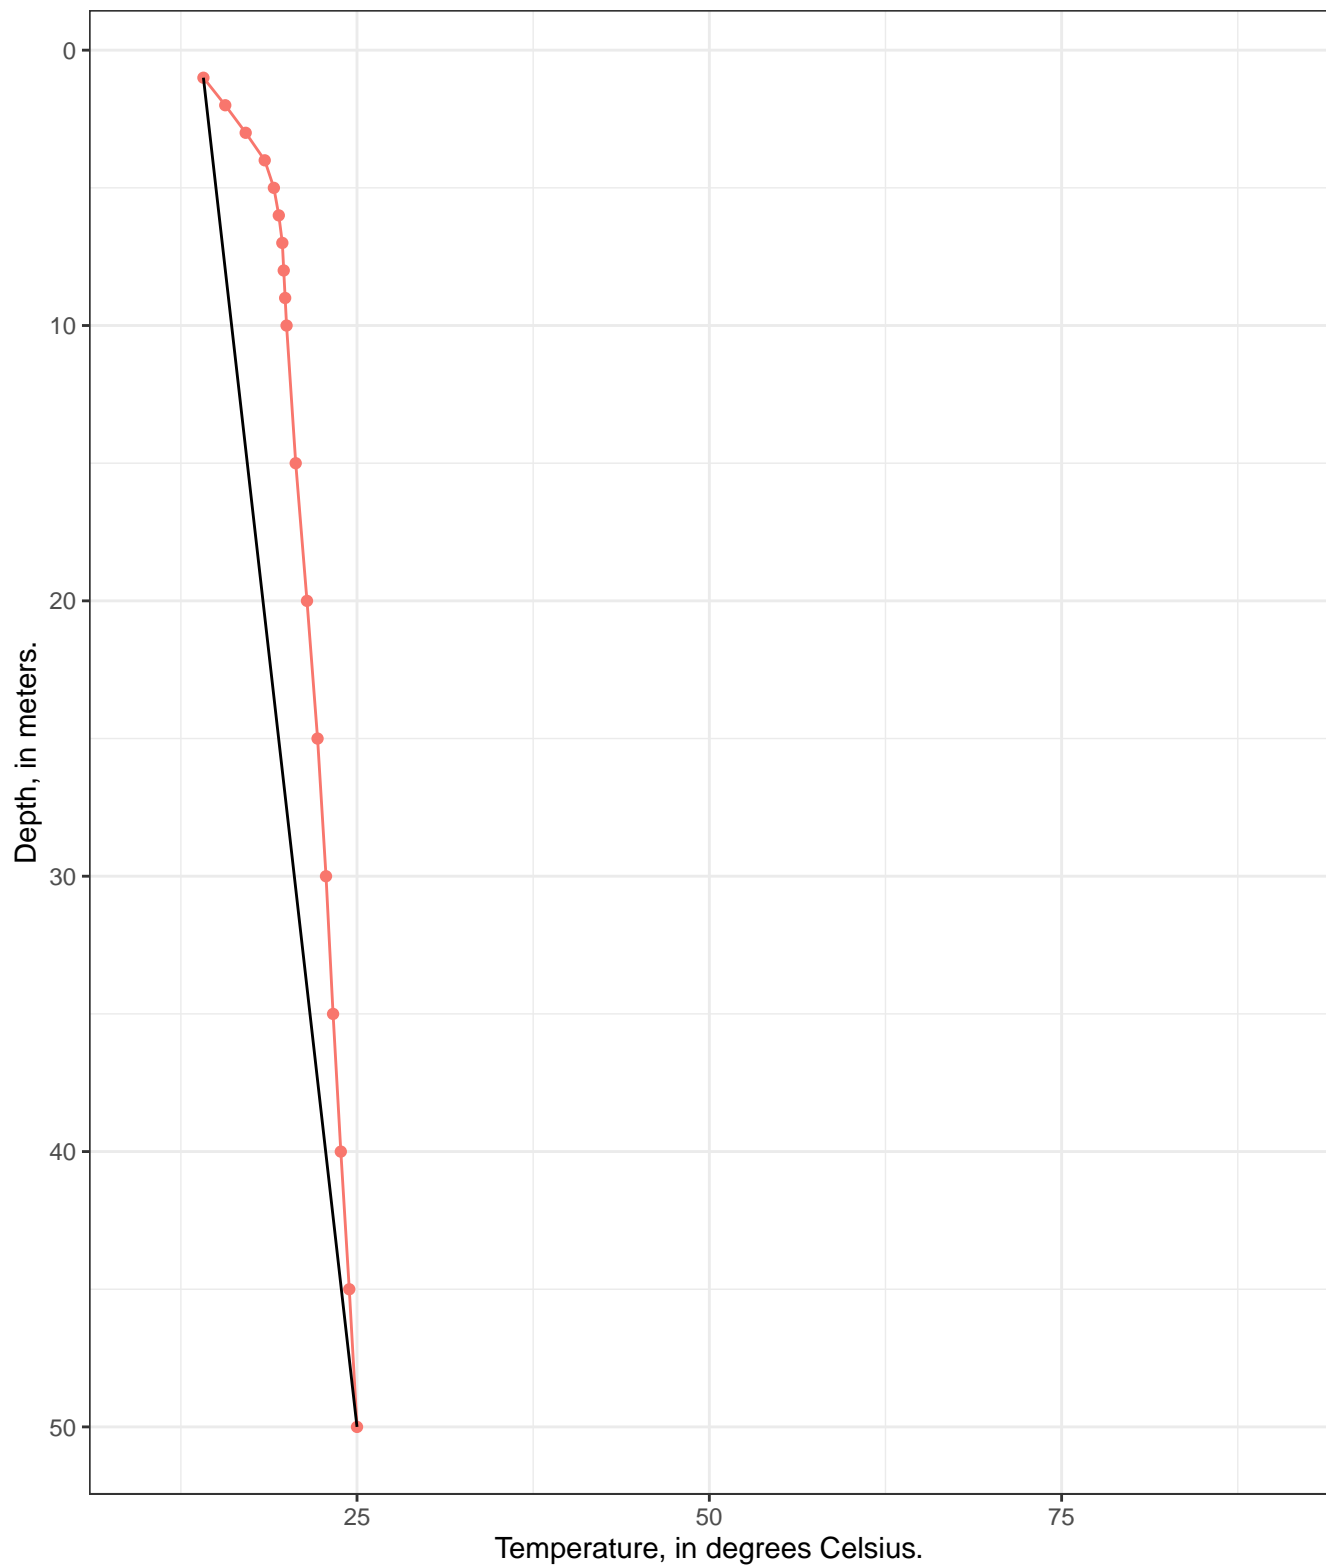

Measurement date 1984-01-26

ID: 270 [TG-128\_NMSUEI]

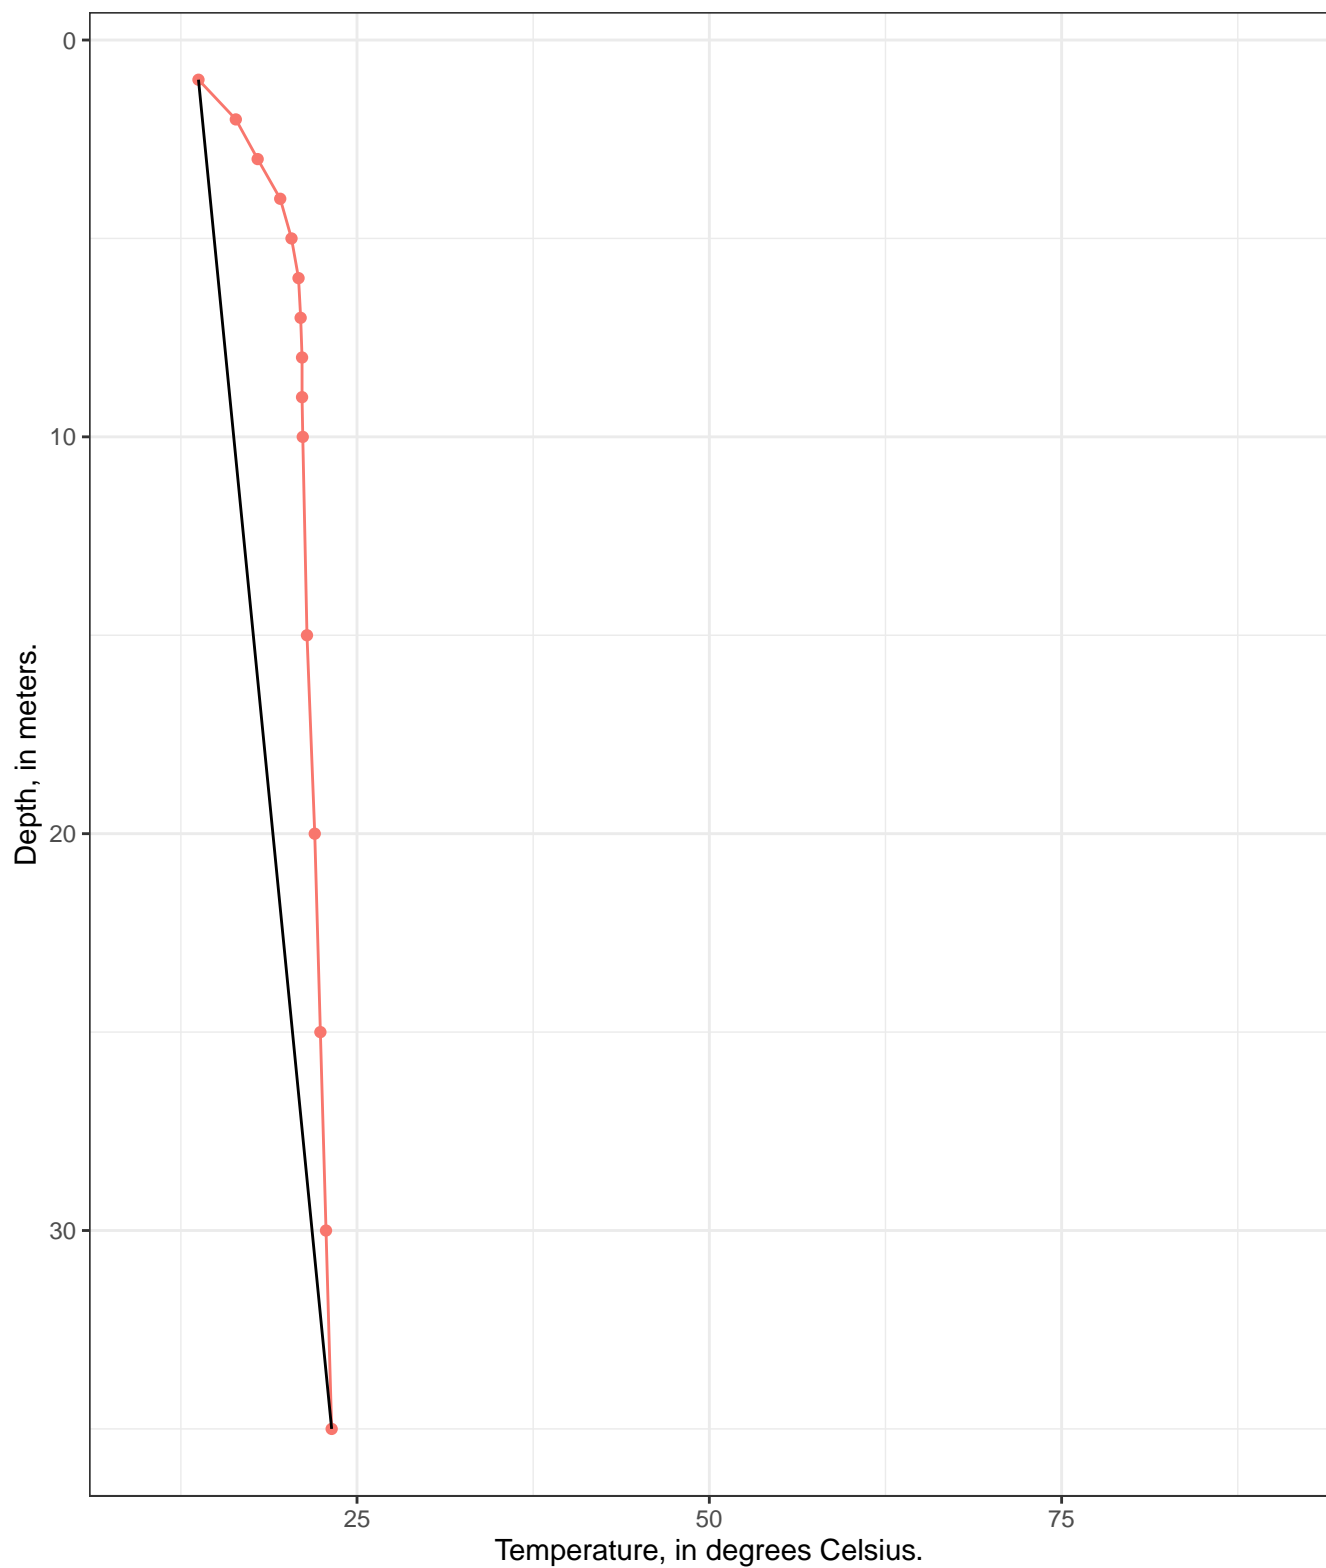

Measurement date 1984-01-23

ID: 271 [TG-129\_NMSUEI]

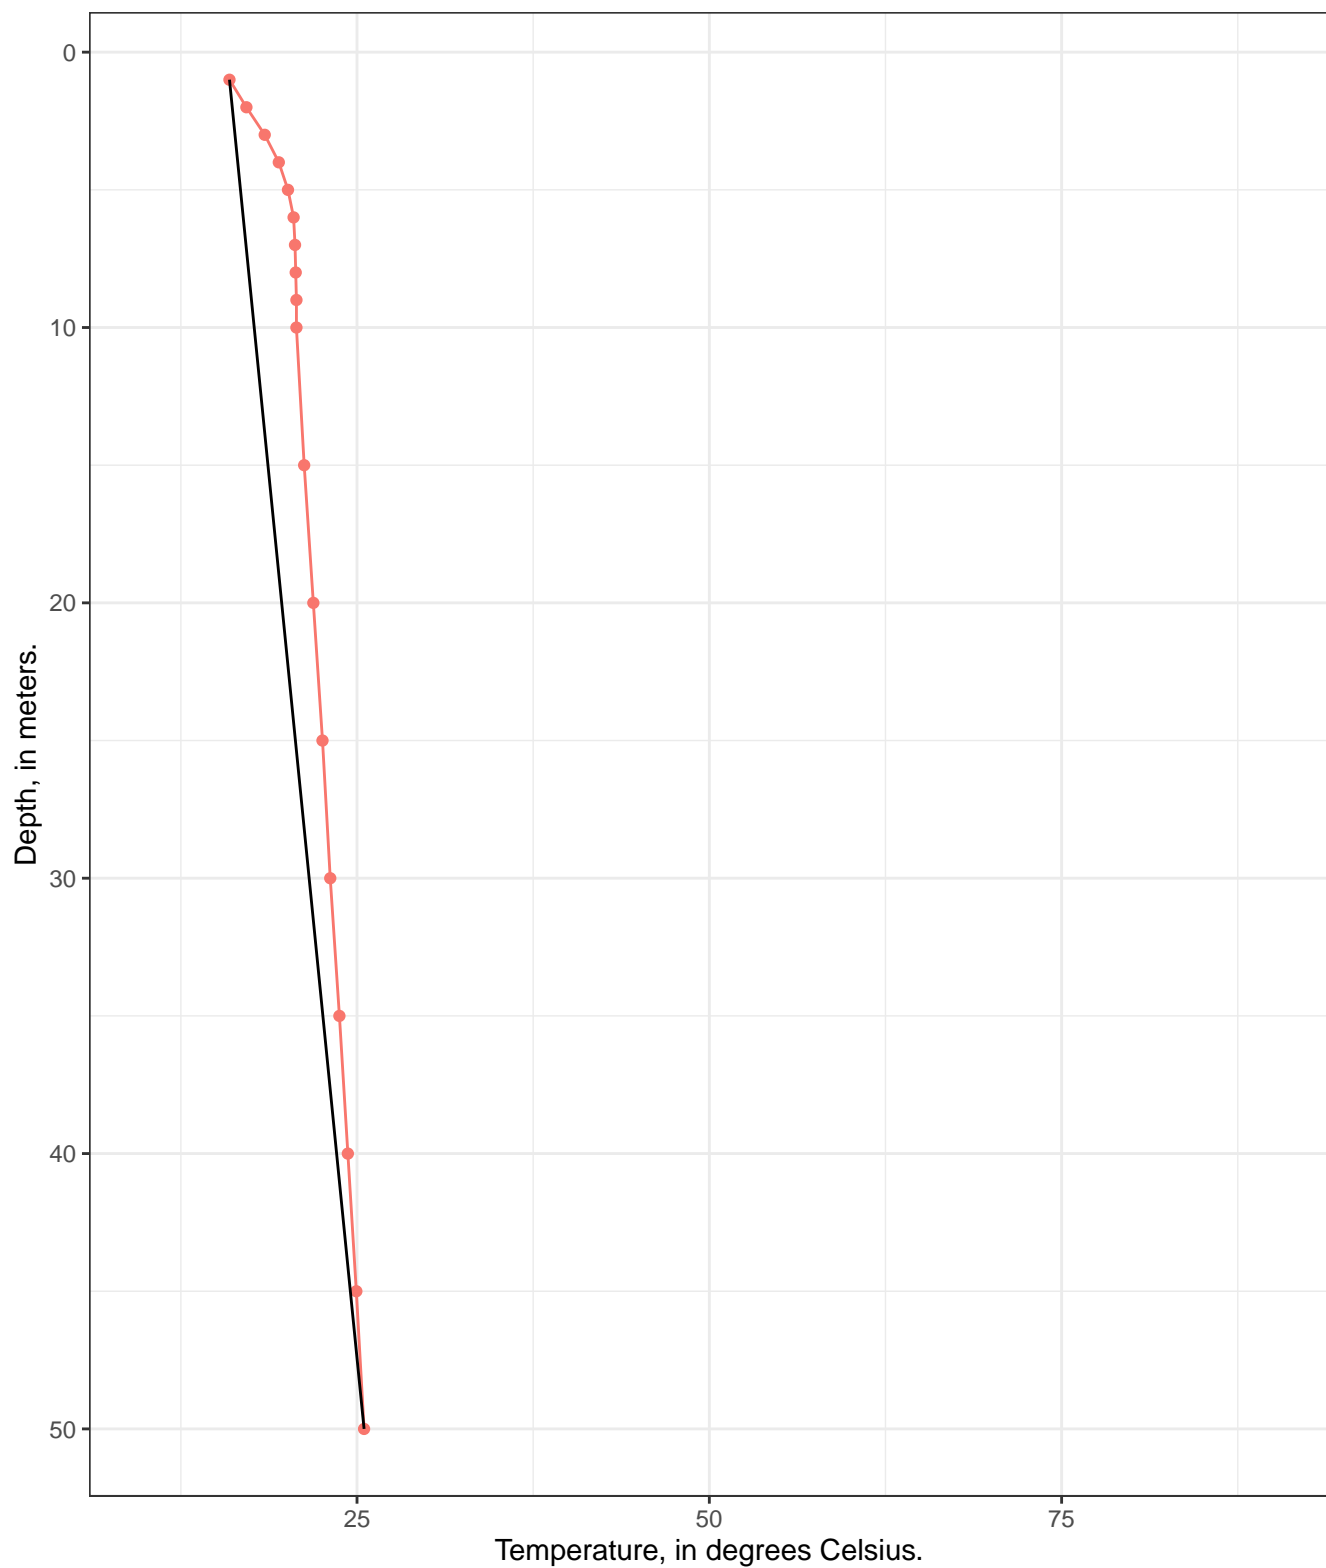

Measurement date 1984-01-16



ID: 272 [TG-130\_NMSUEI]

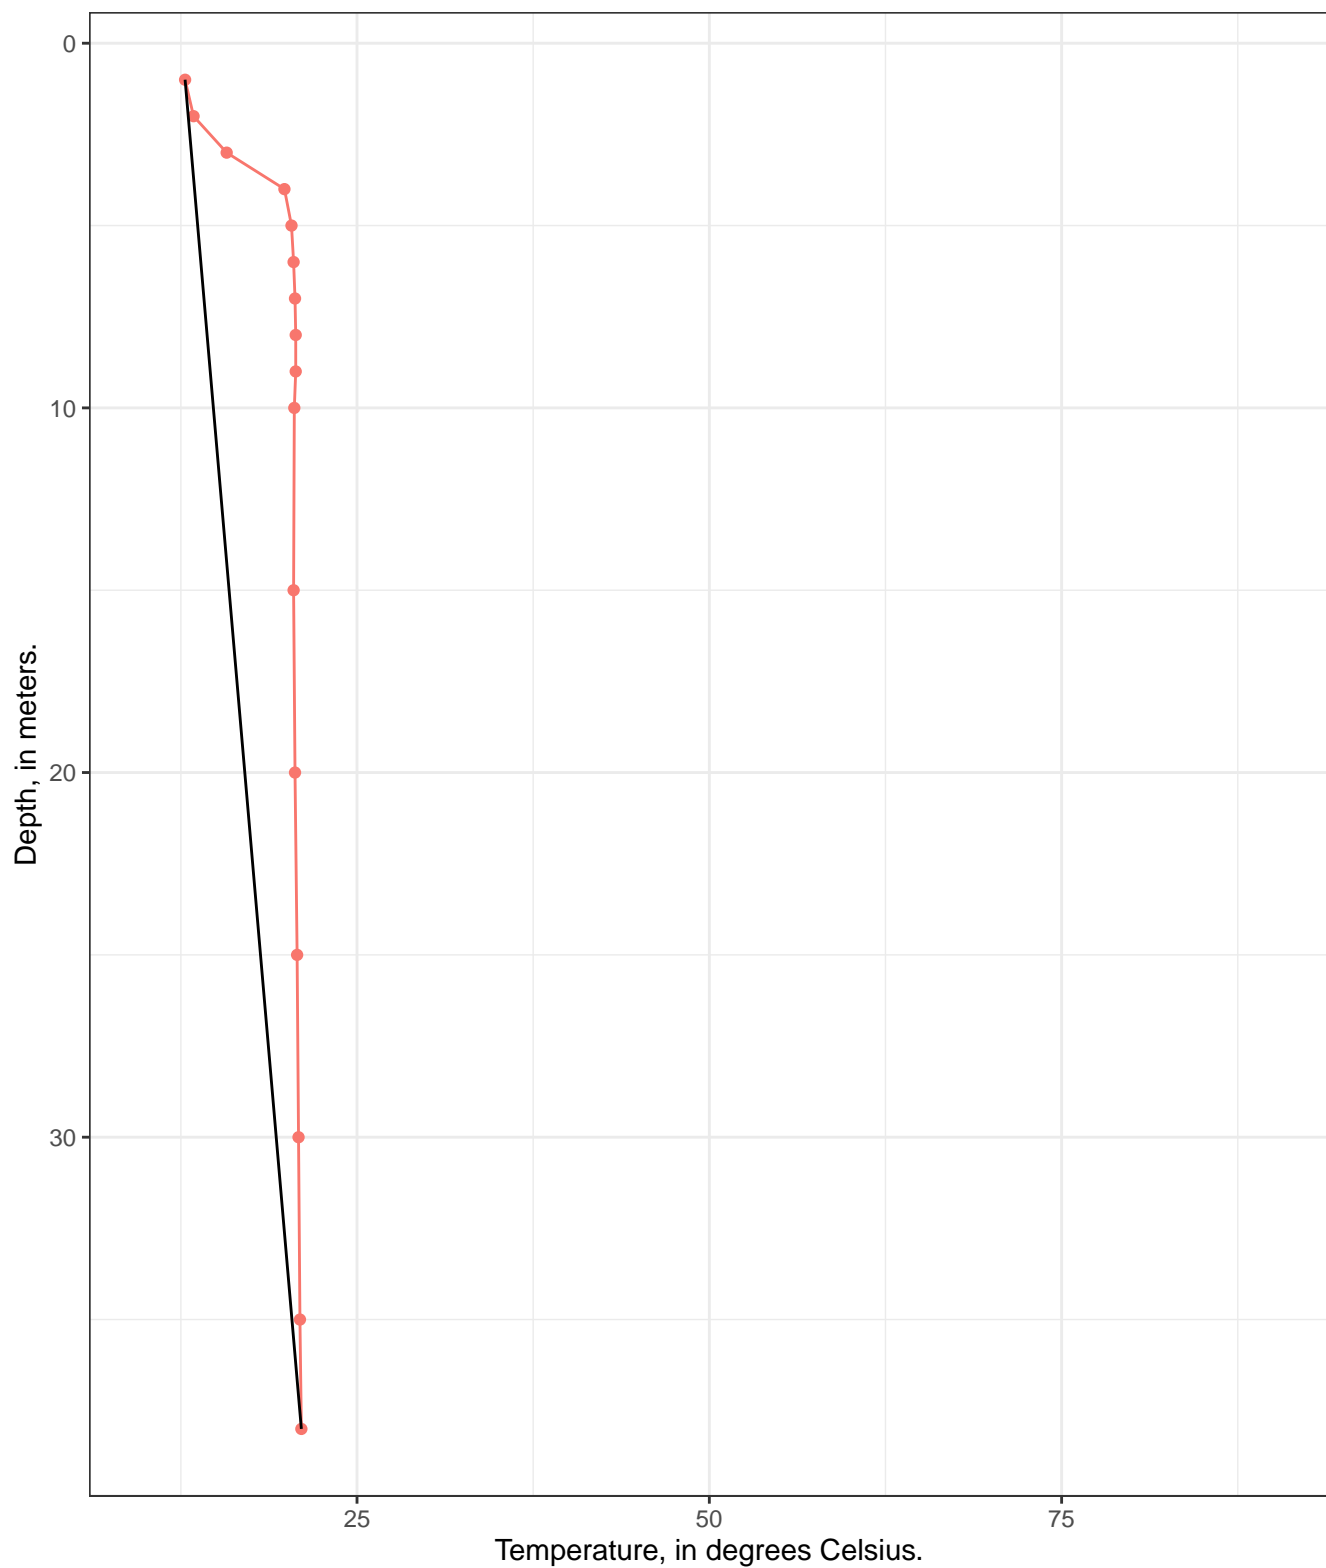

ID: 273 [TG-132\_NMSUEI]

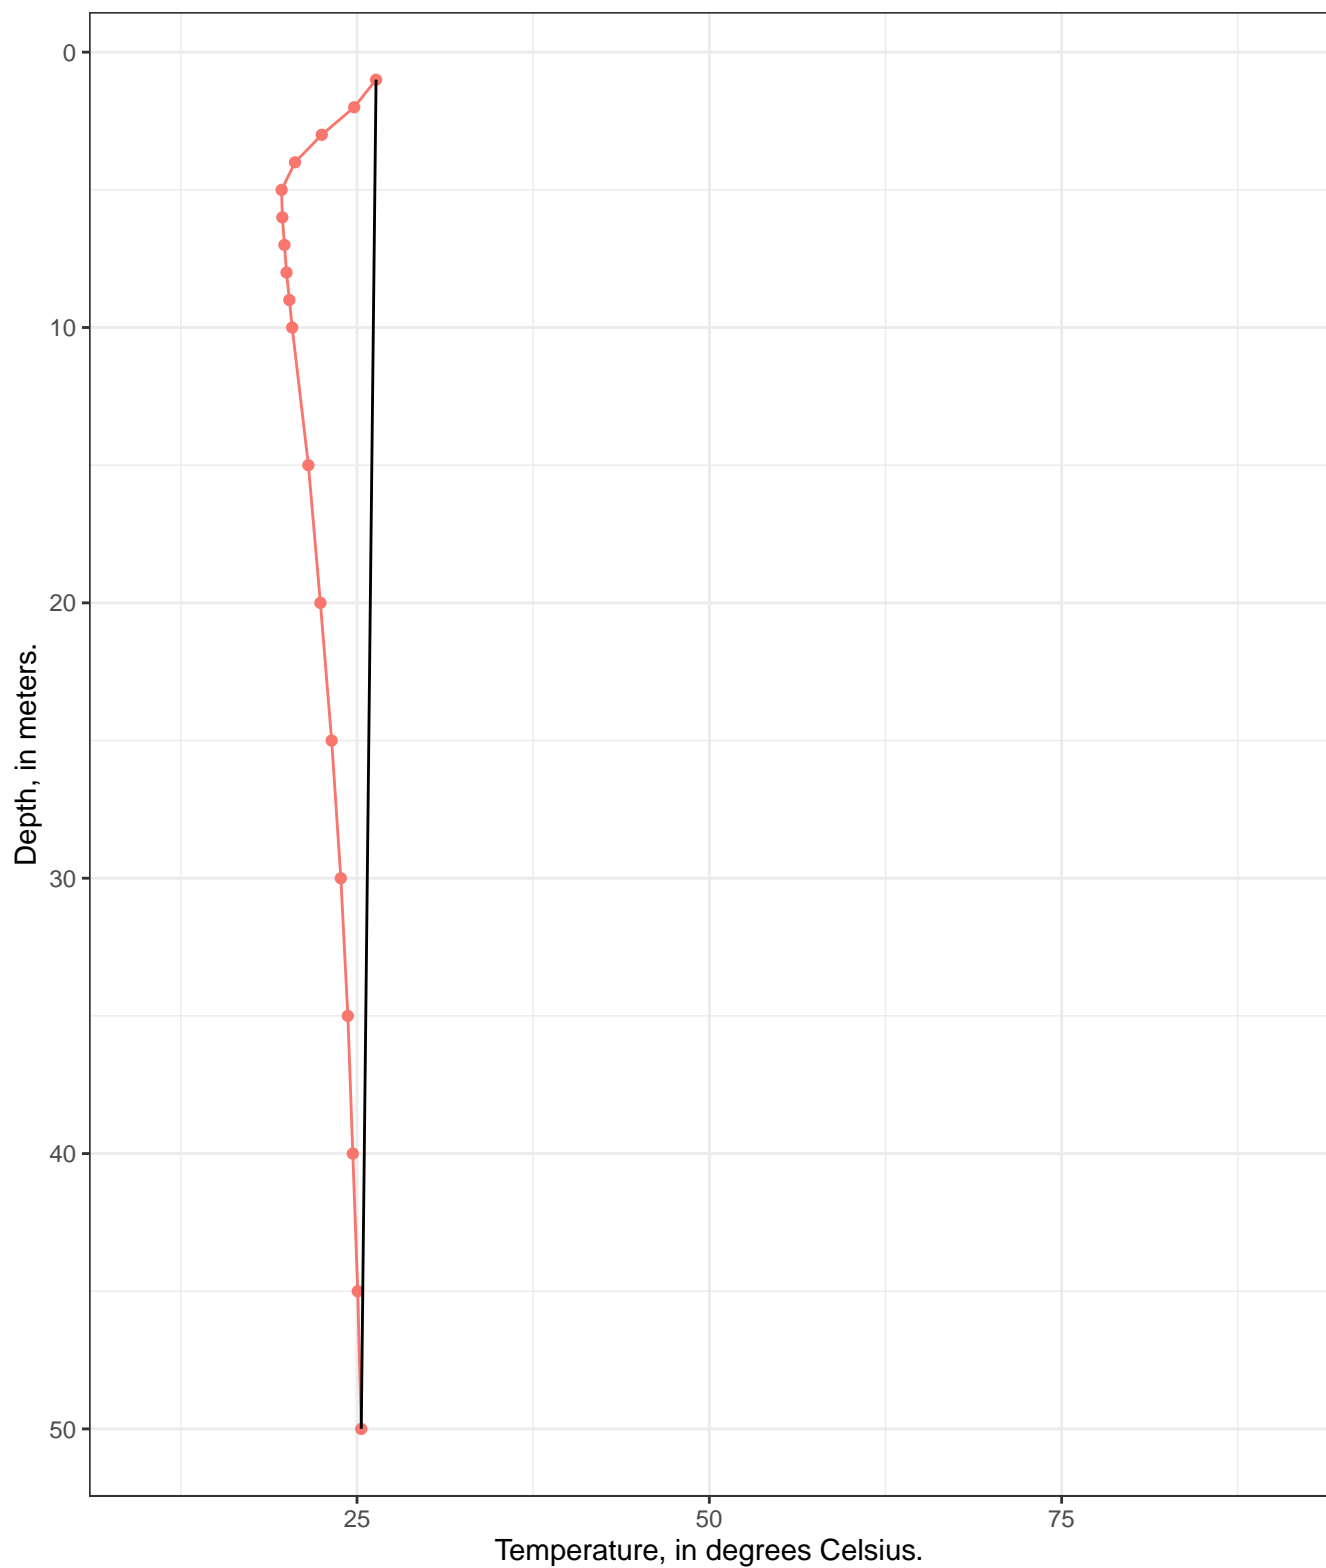

Measurement date 1984-08-19

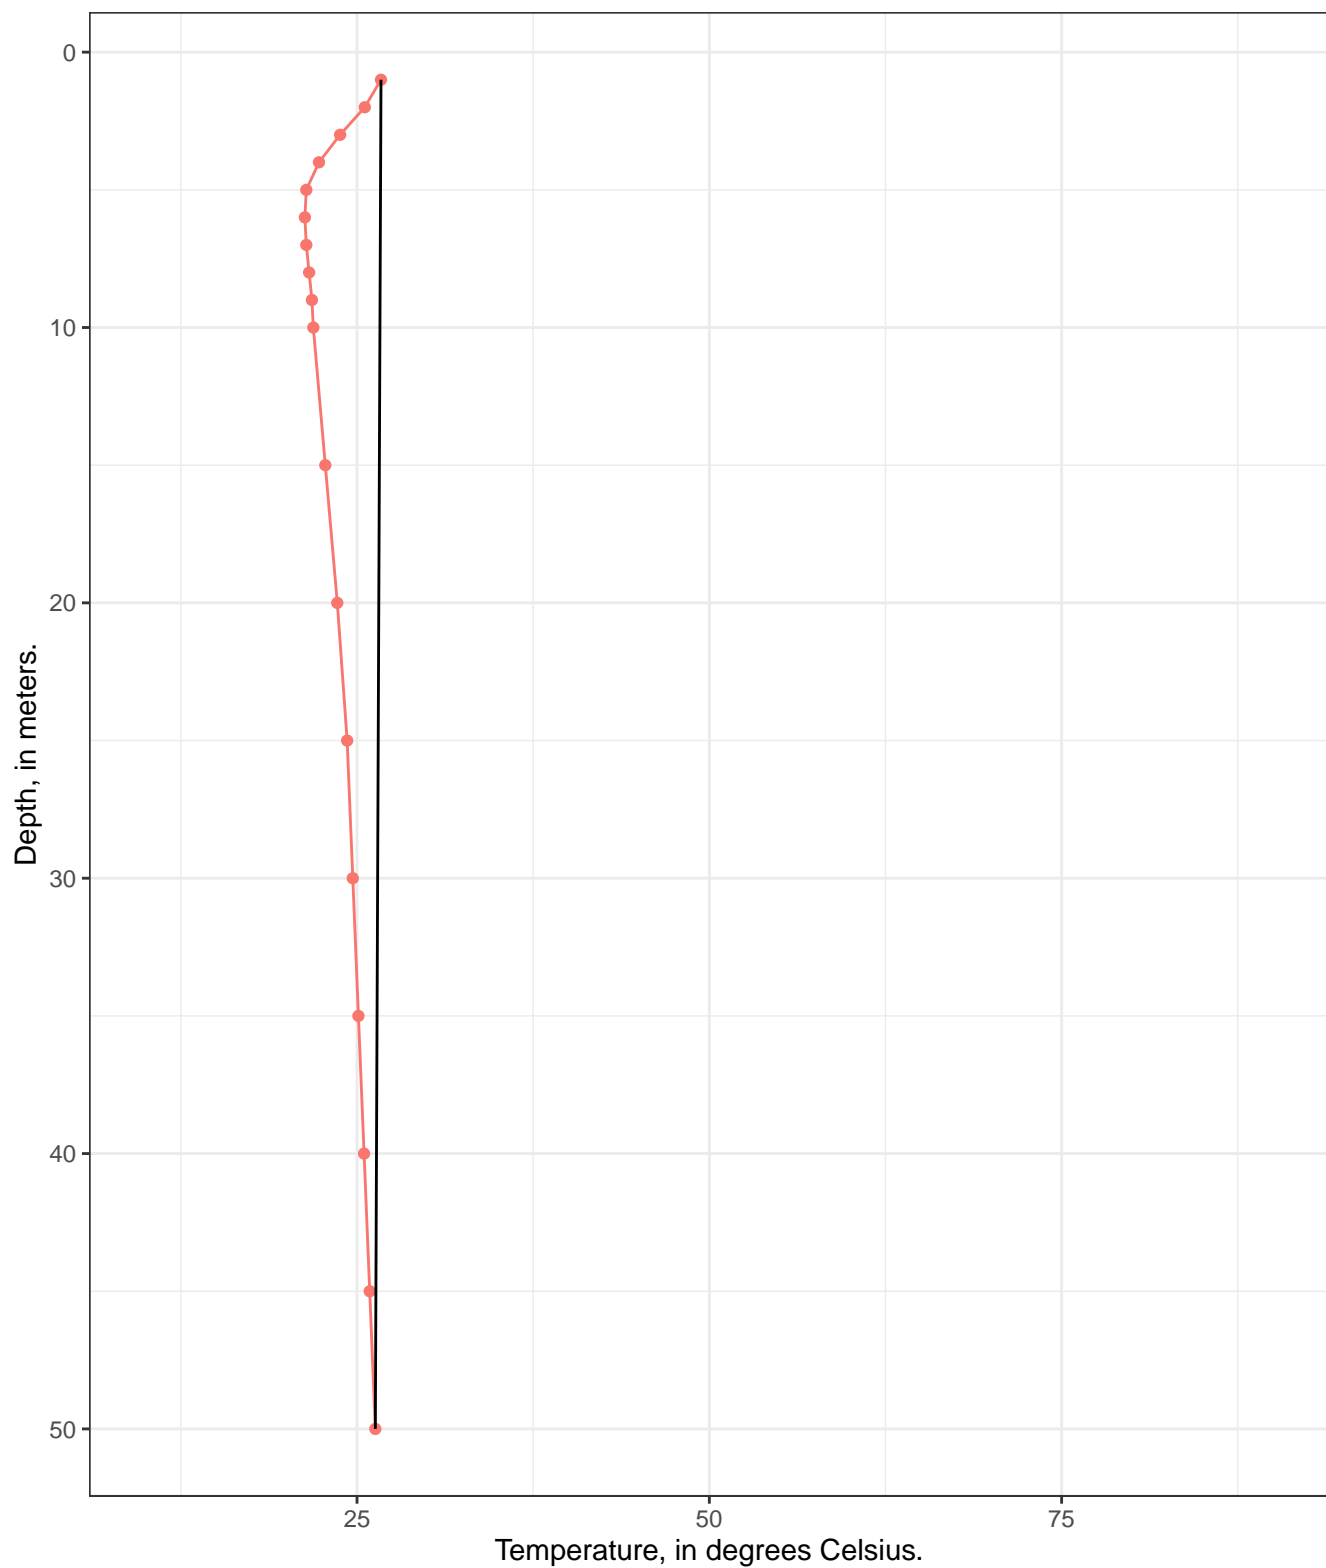

ID: 275 [TG-143\_NMSUEI]

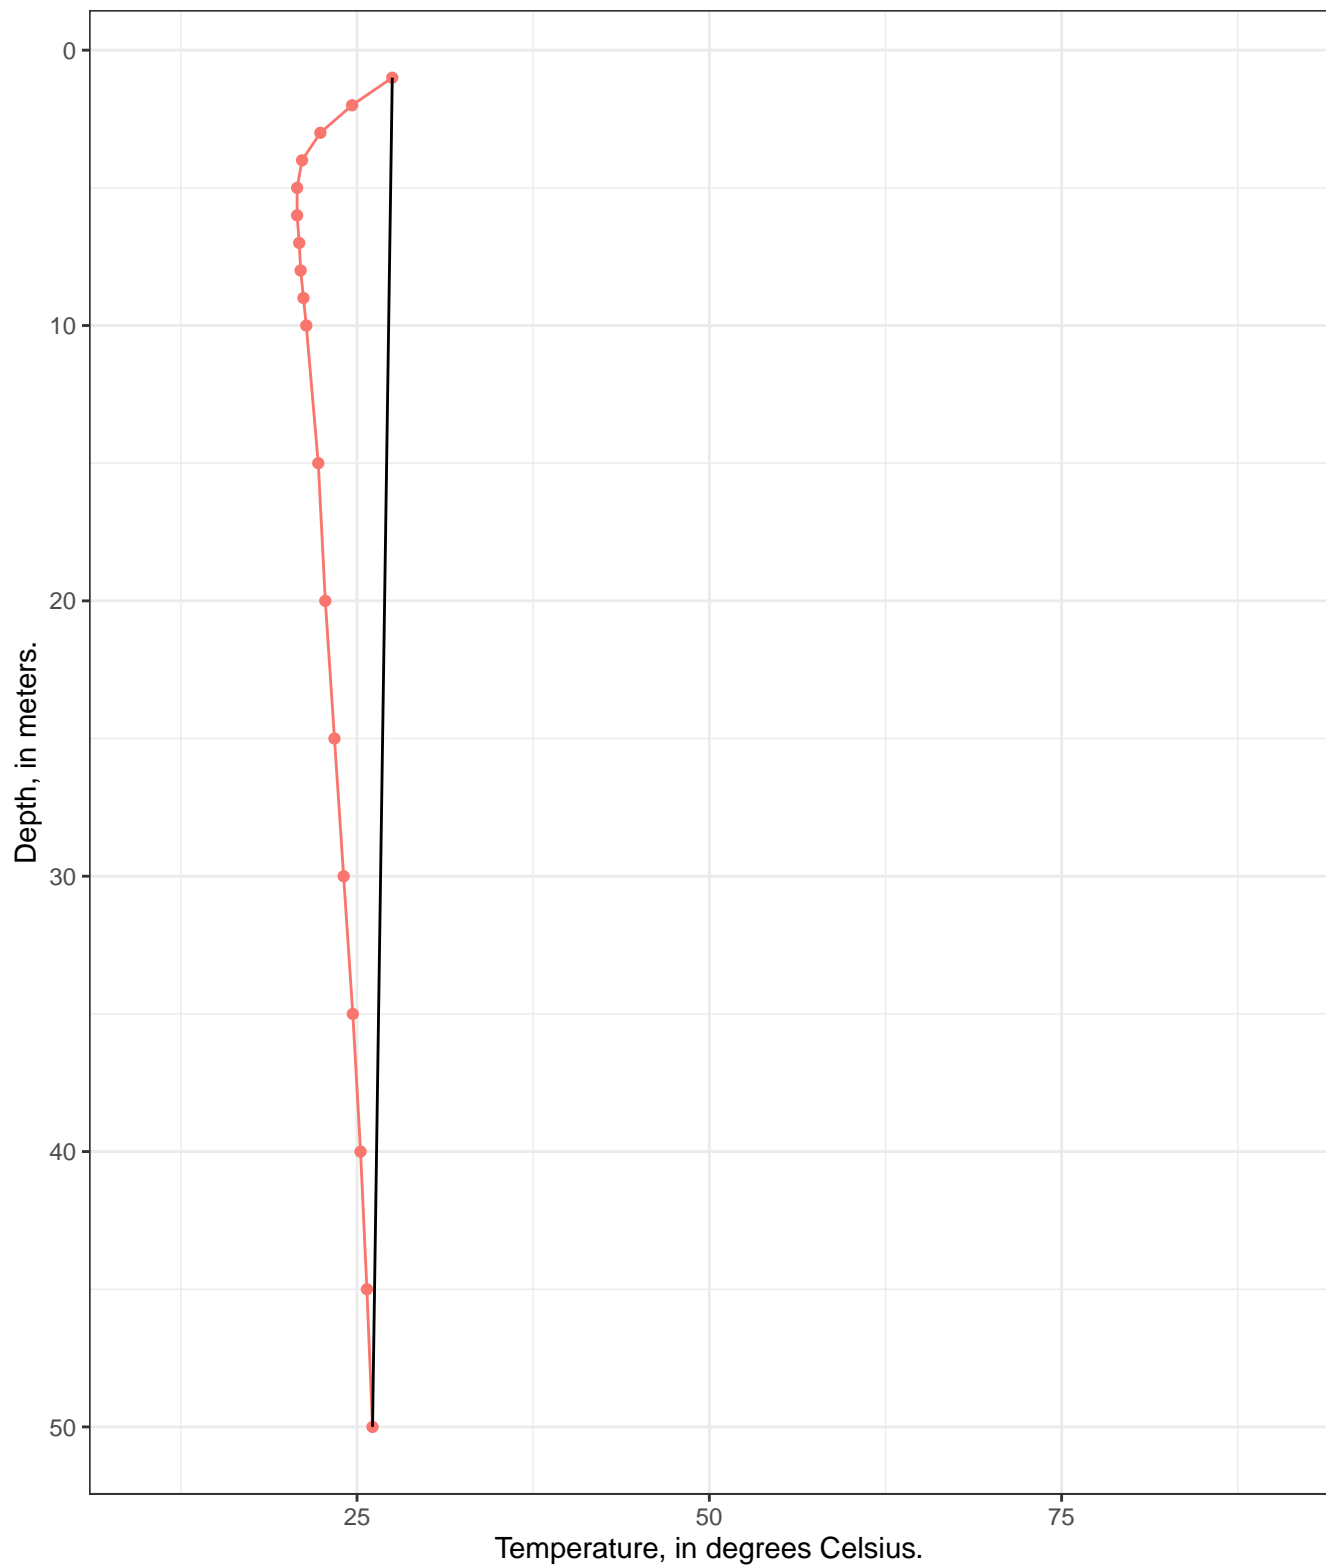

Measurement date 1984-08-08

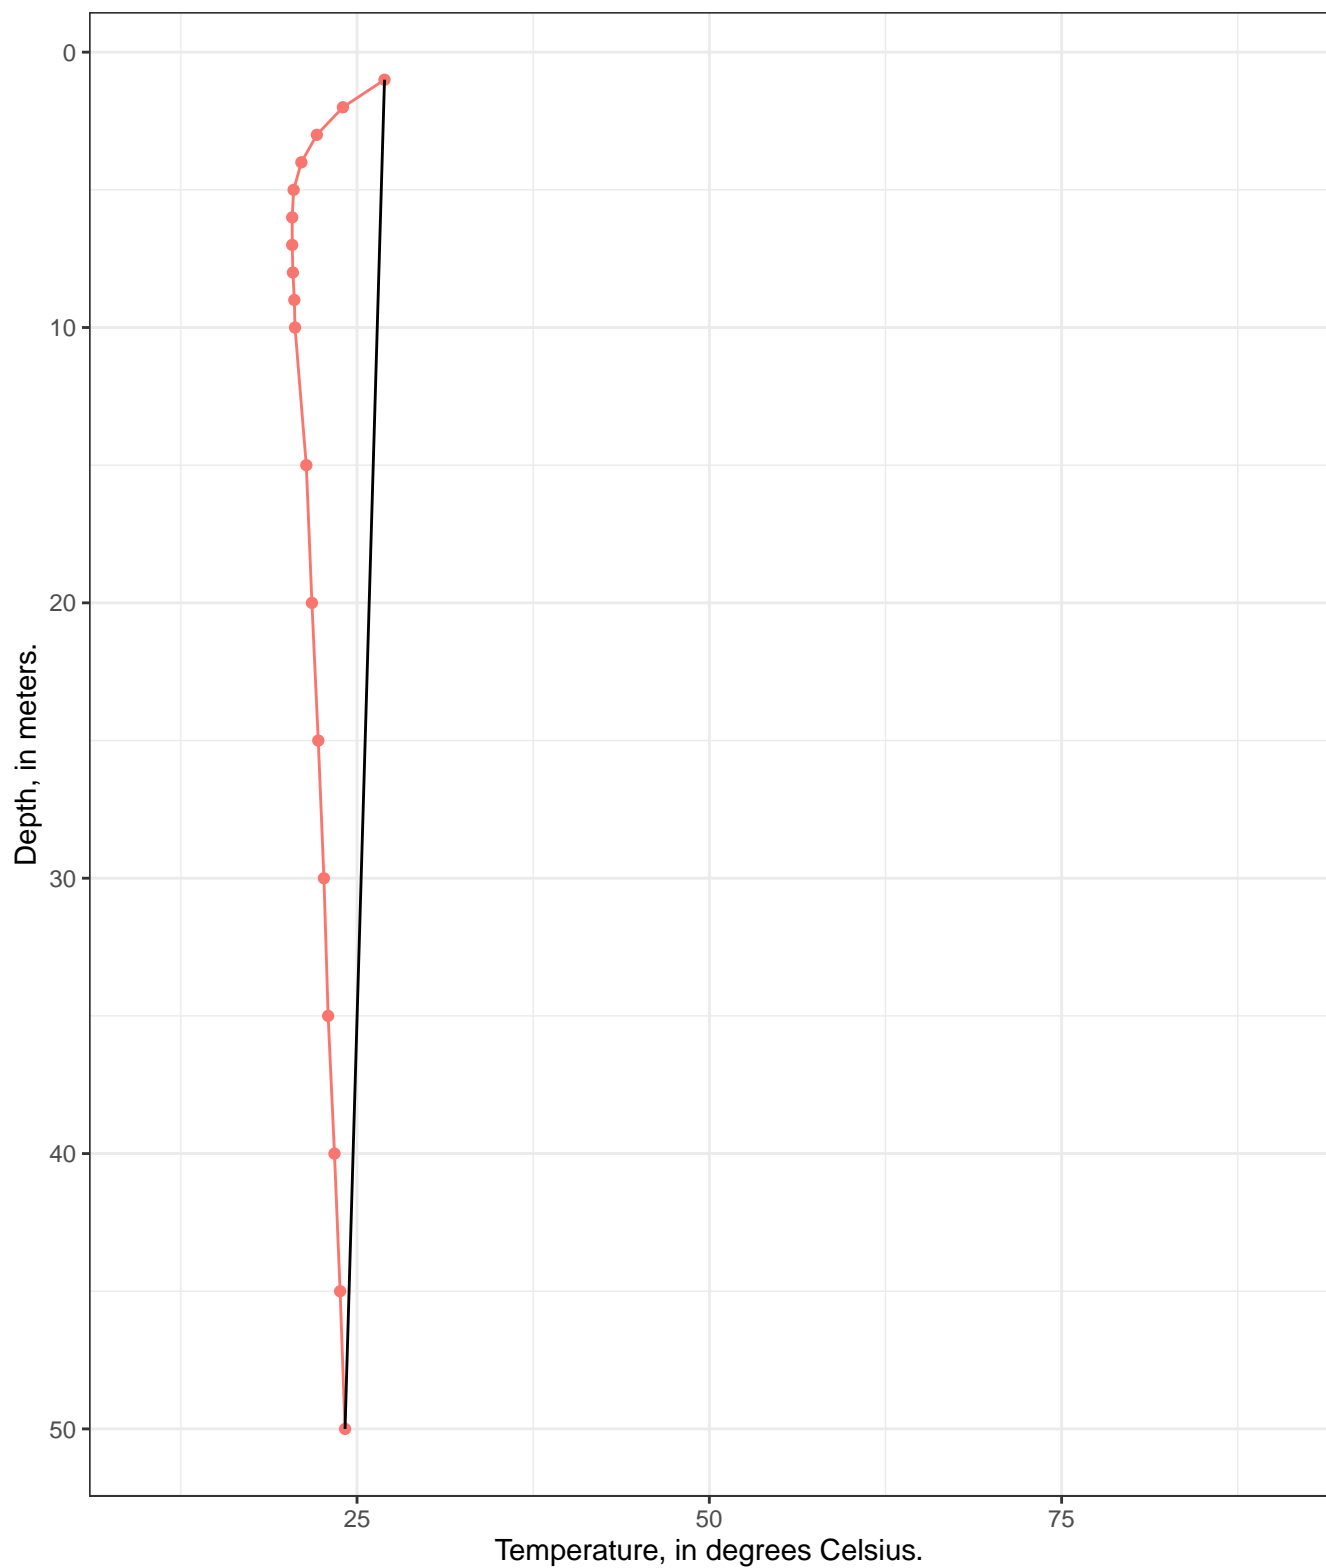

ID: 277 [TG-145\_NMSUEI]

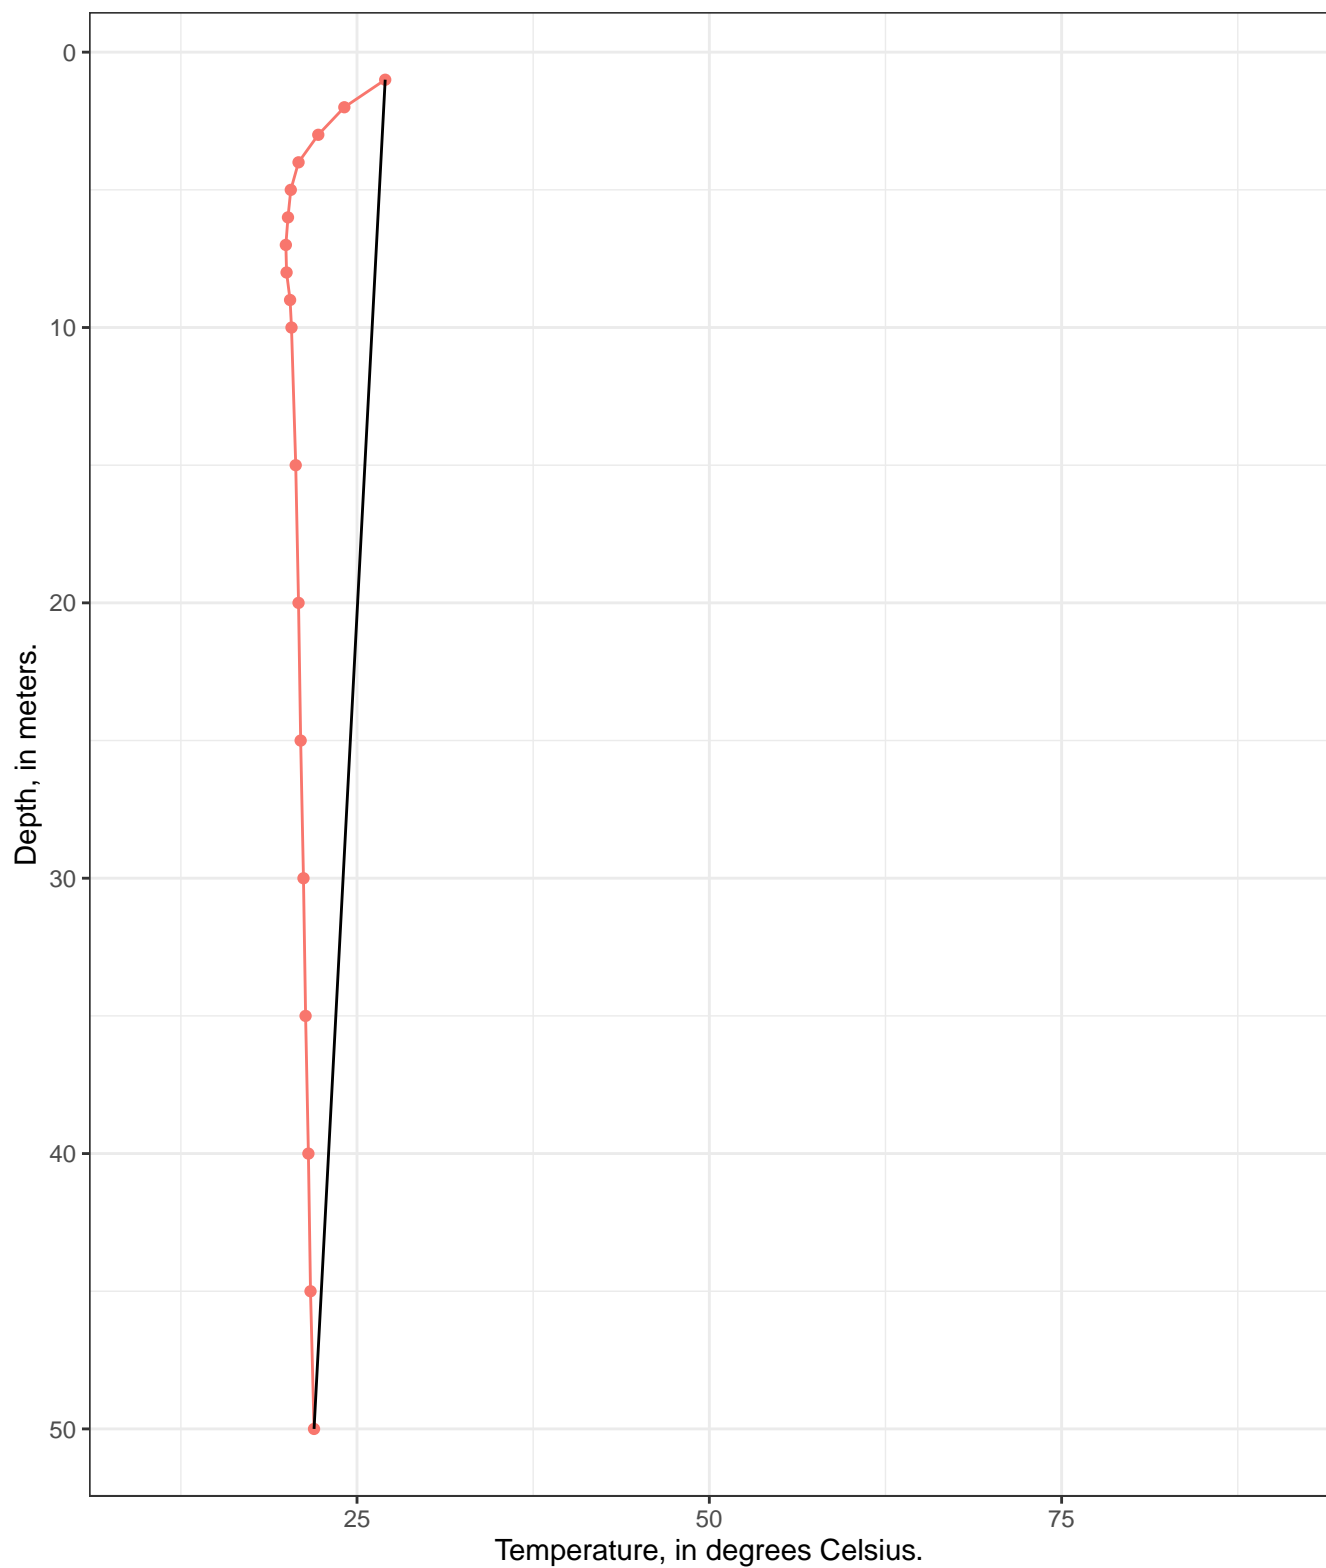

Measurement date 1984-07-31

ID: 278 [TG-146\_NMSUEI]

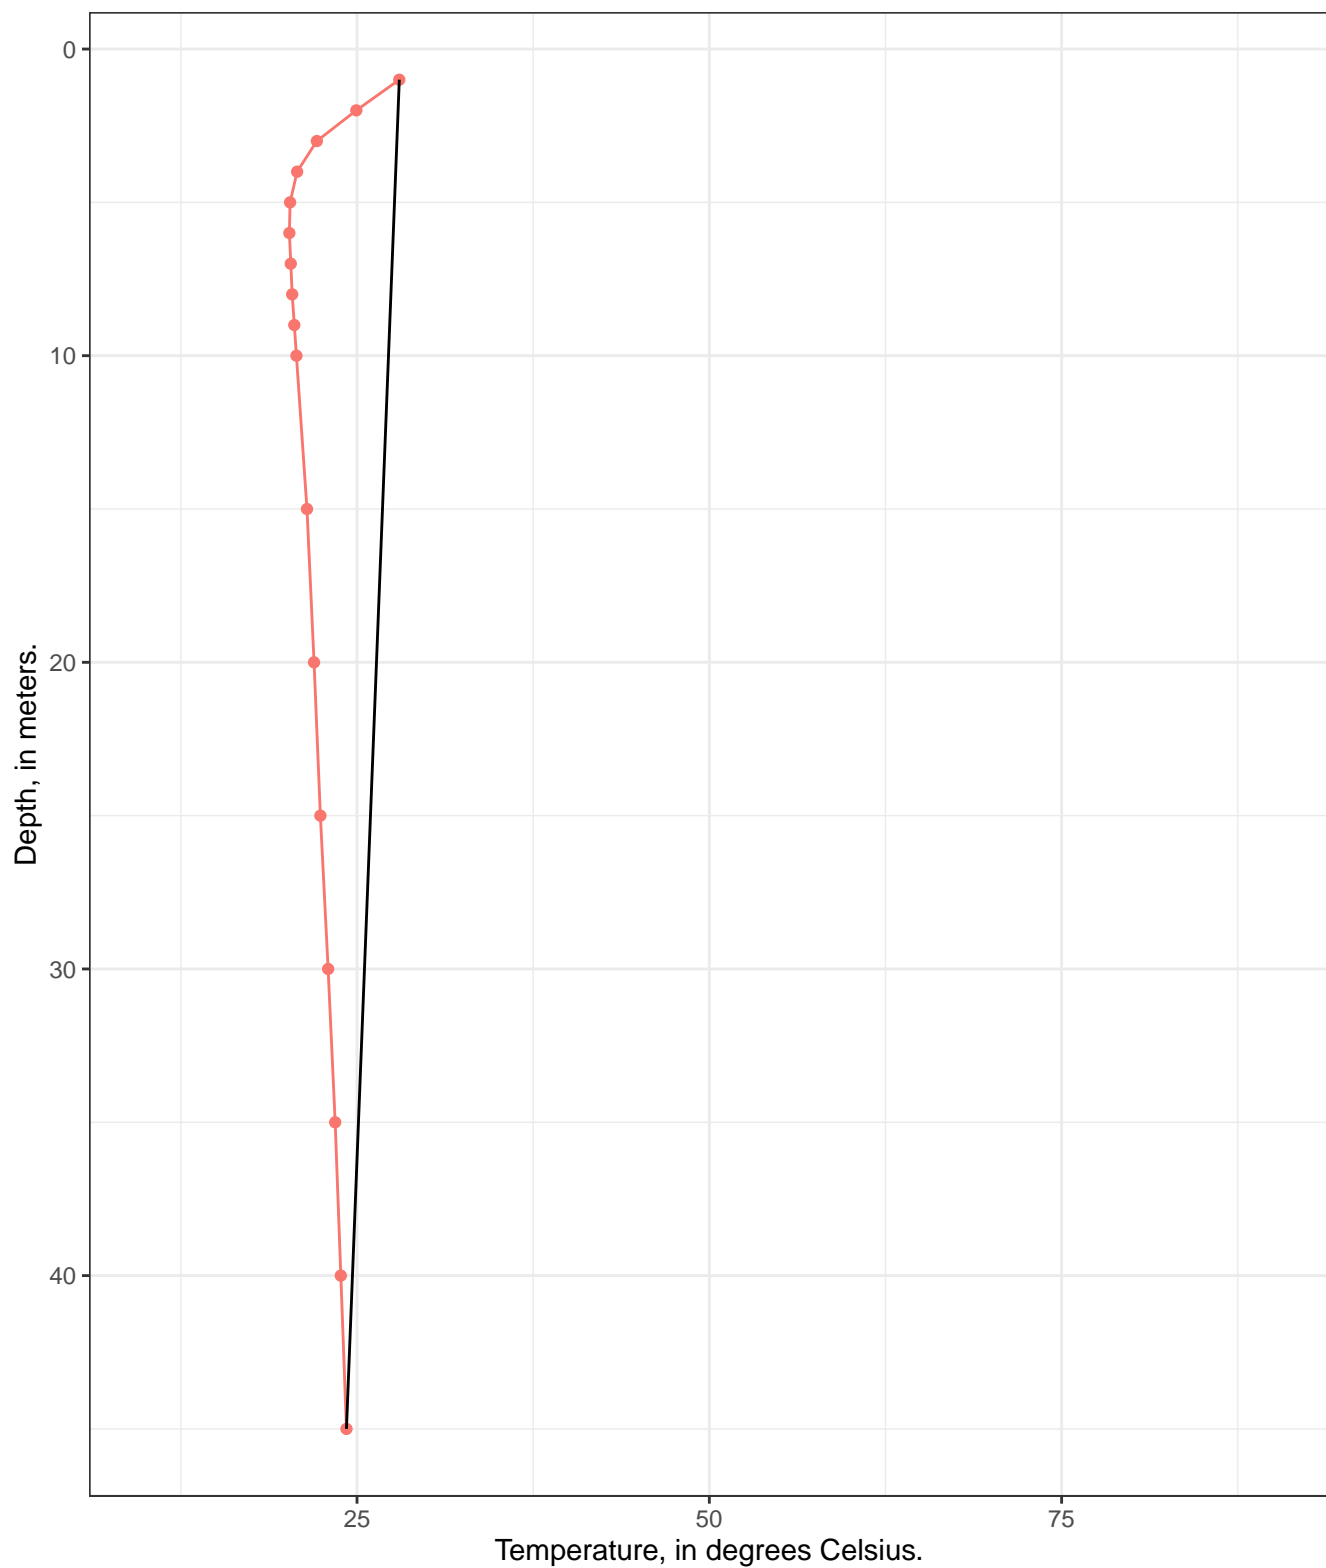

Measurement date 1984-08-01

ID: 279 [TG-147\_NMSUEI]

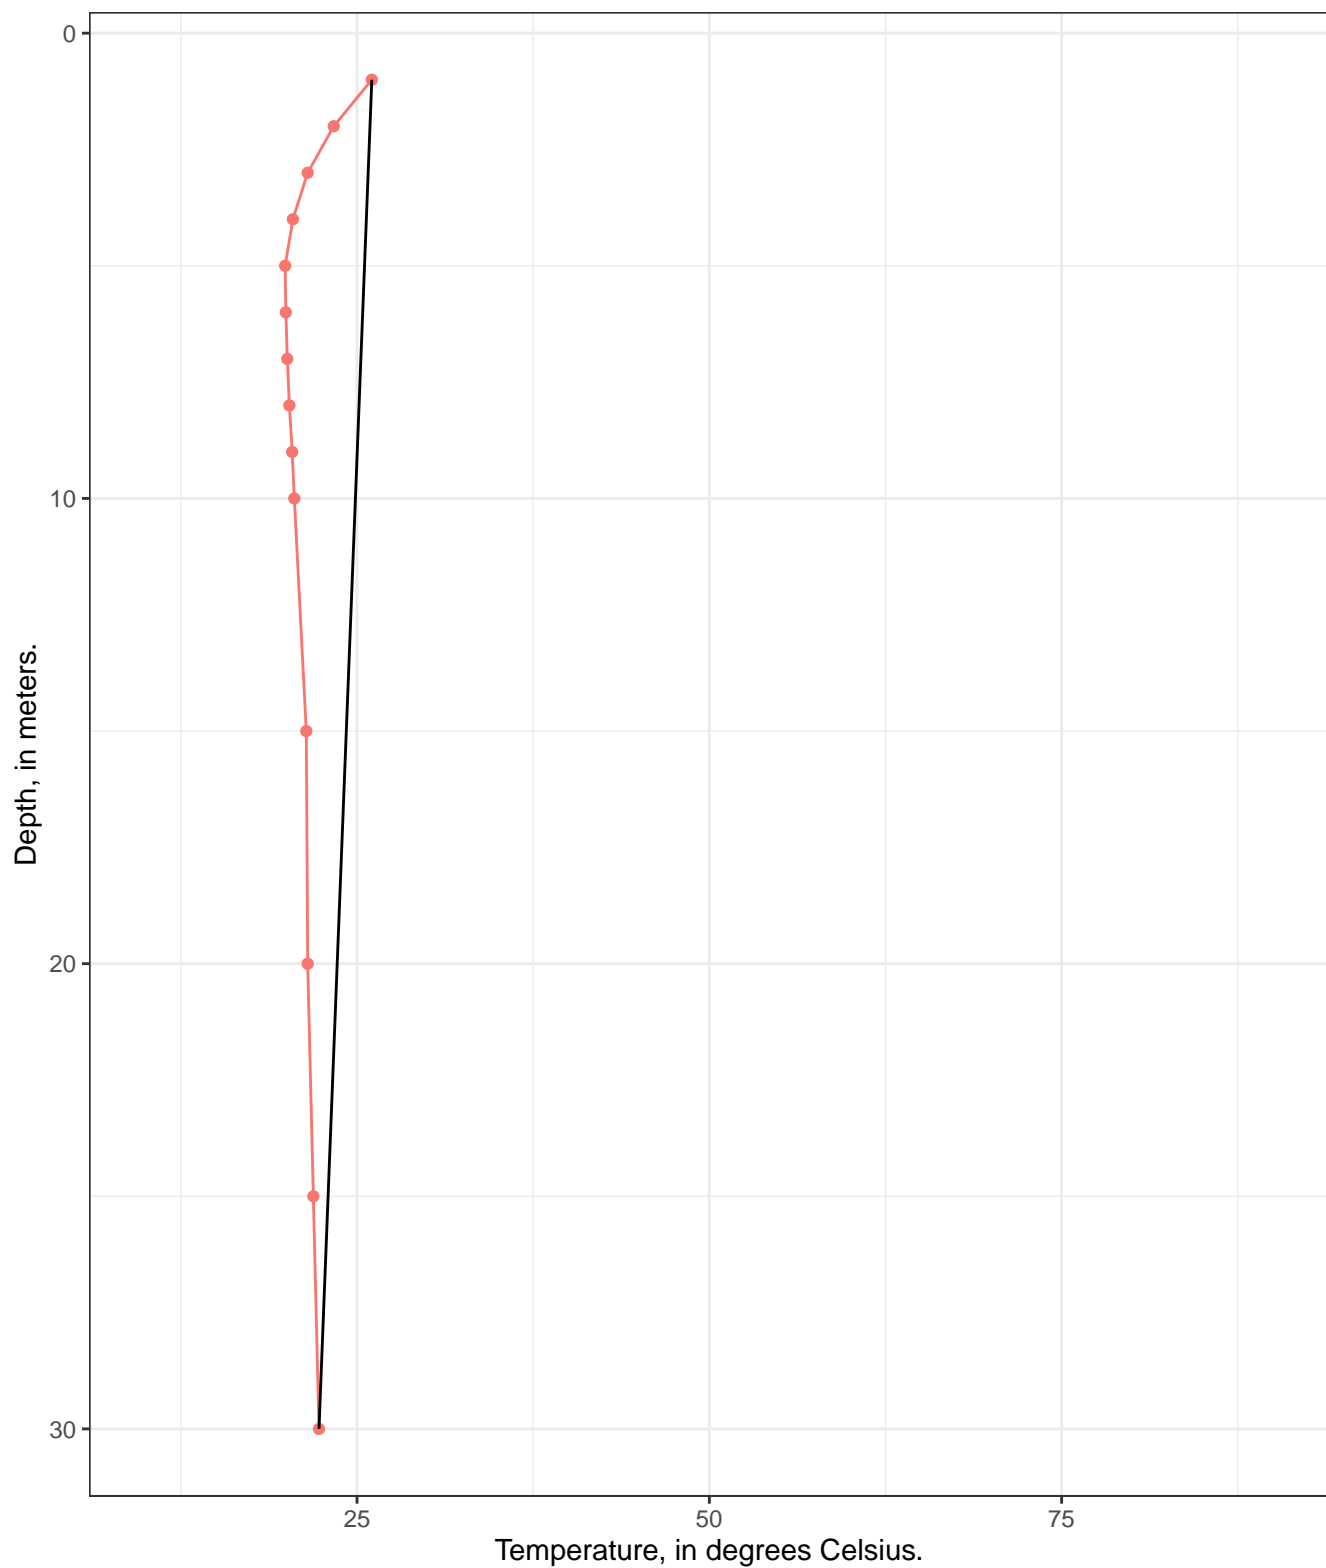

Measurement date 1984-08-01



ID: 280 [TG-148\_NMSUEI]

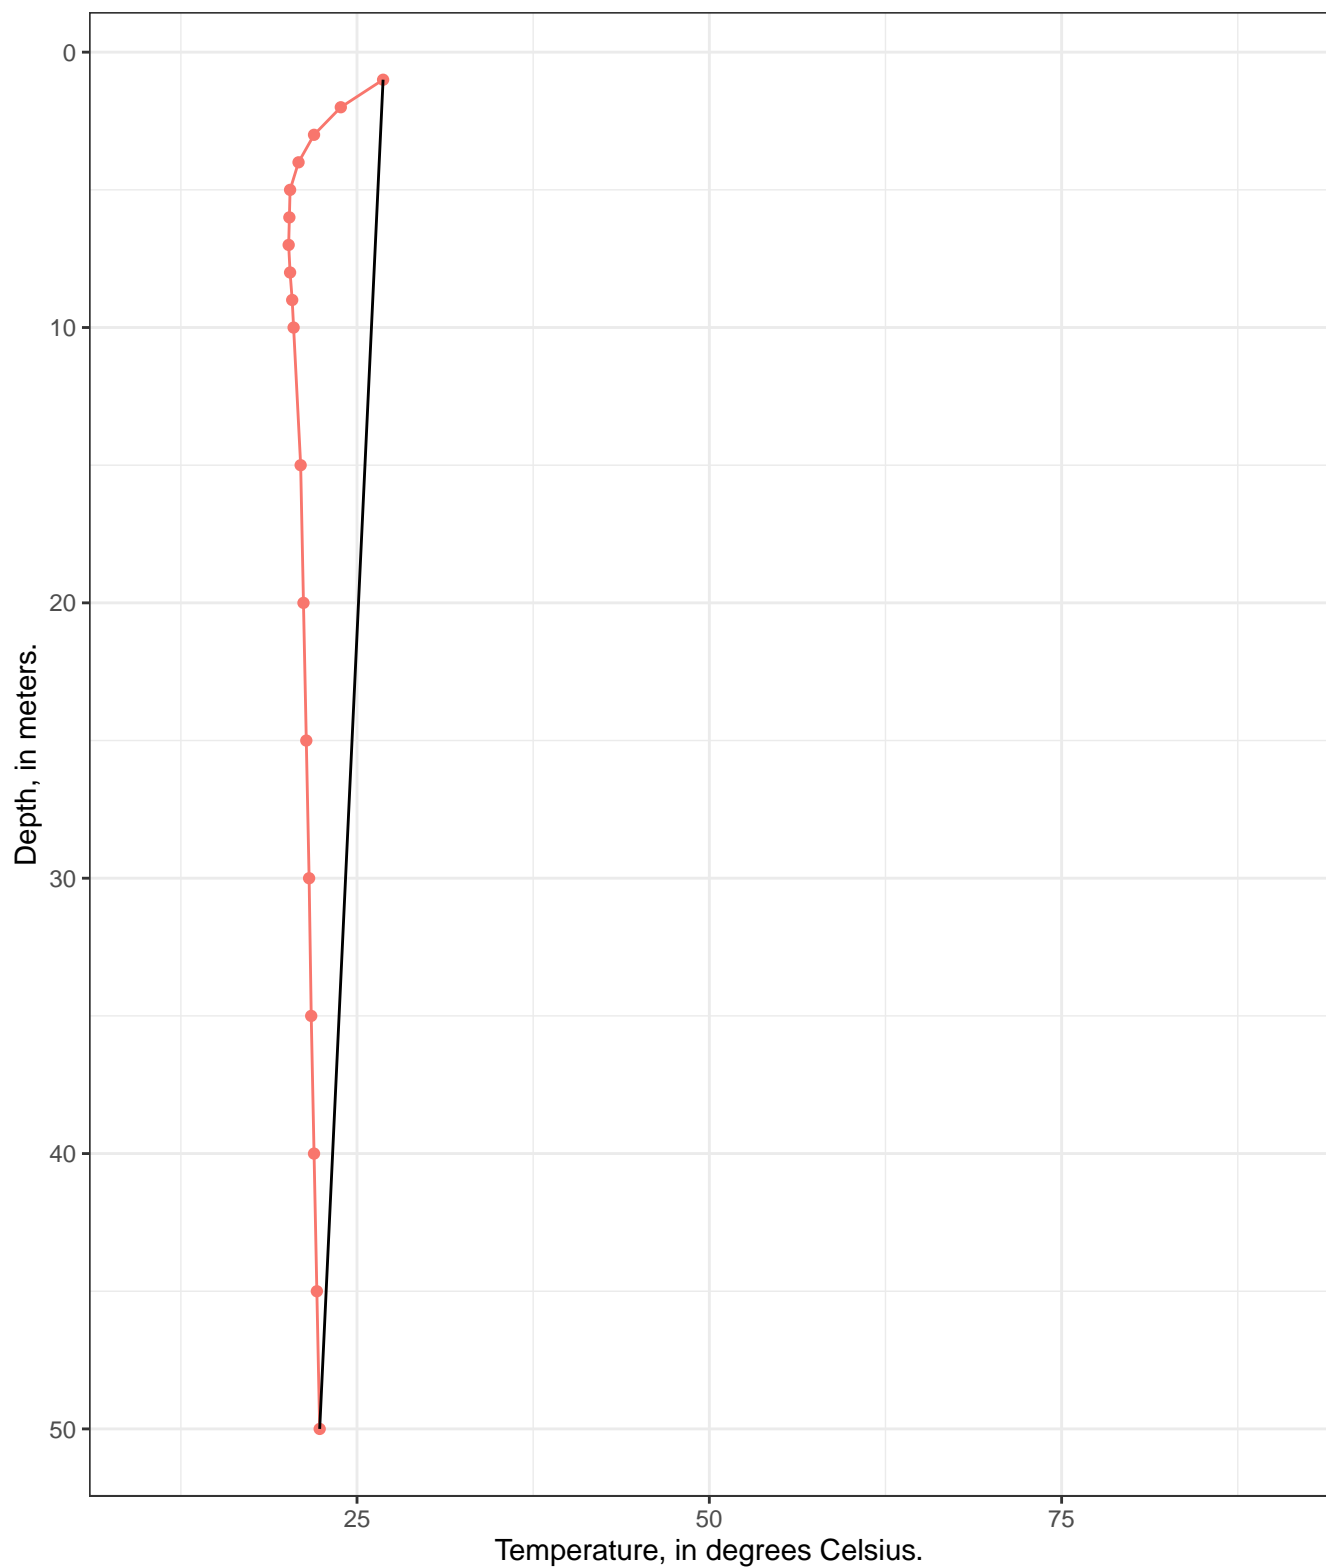

Measurement date 1984-08-03

ID: 281 [TG-149\_NMSUEI]

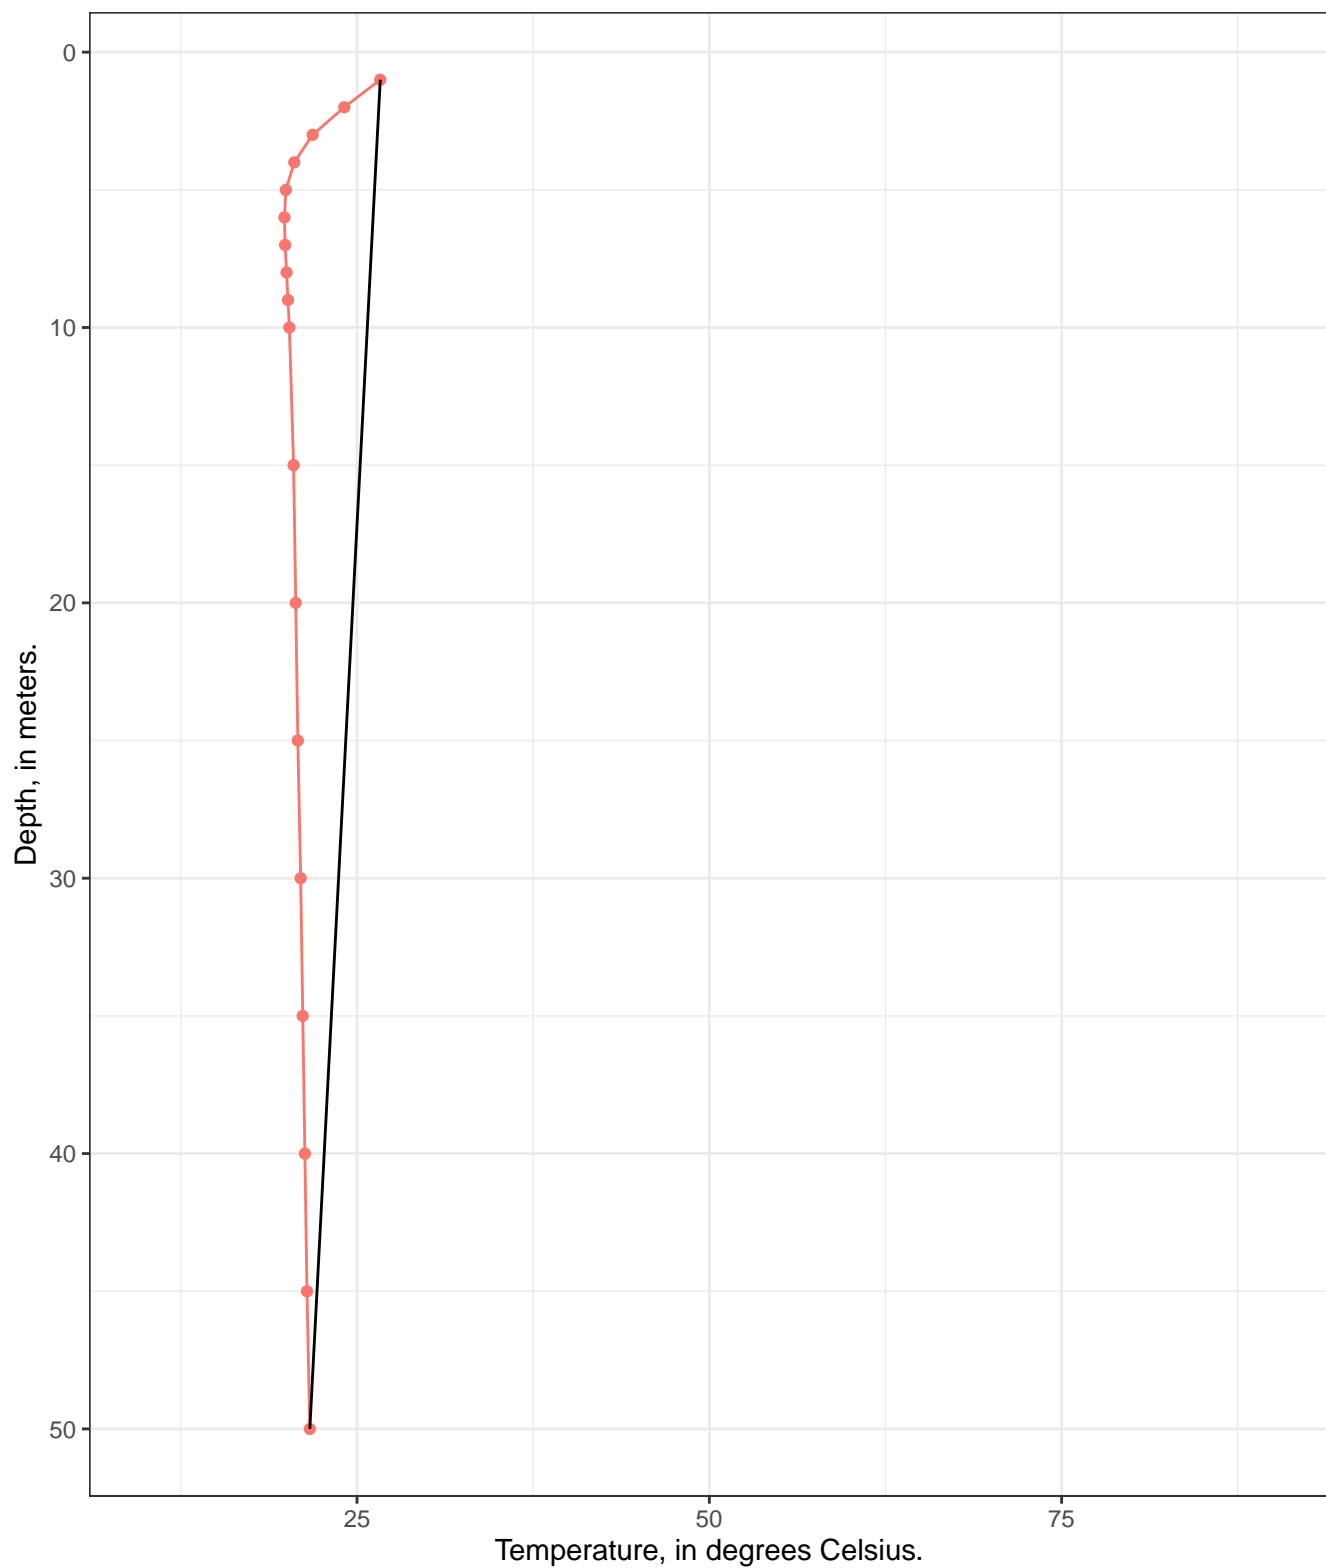

Measurement date 1984-08-03

ID: 282 [TG-150\_NMSUEI]

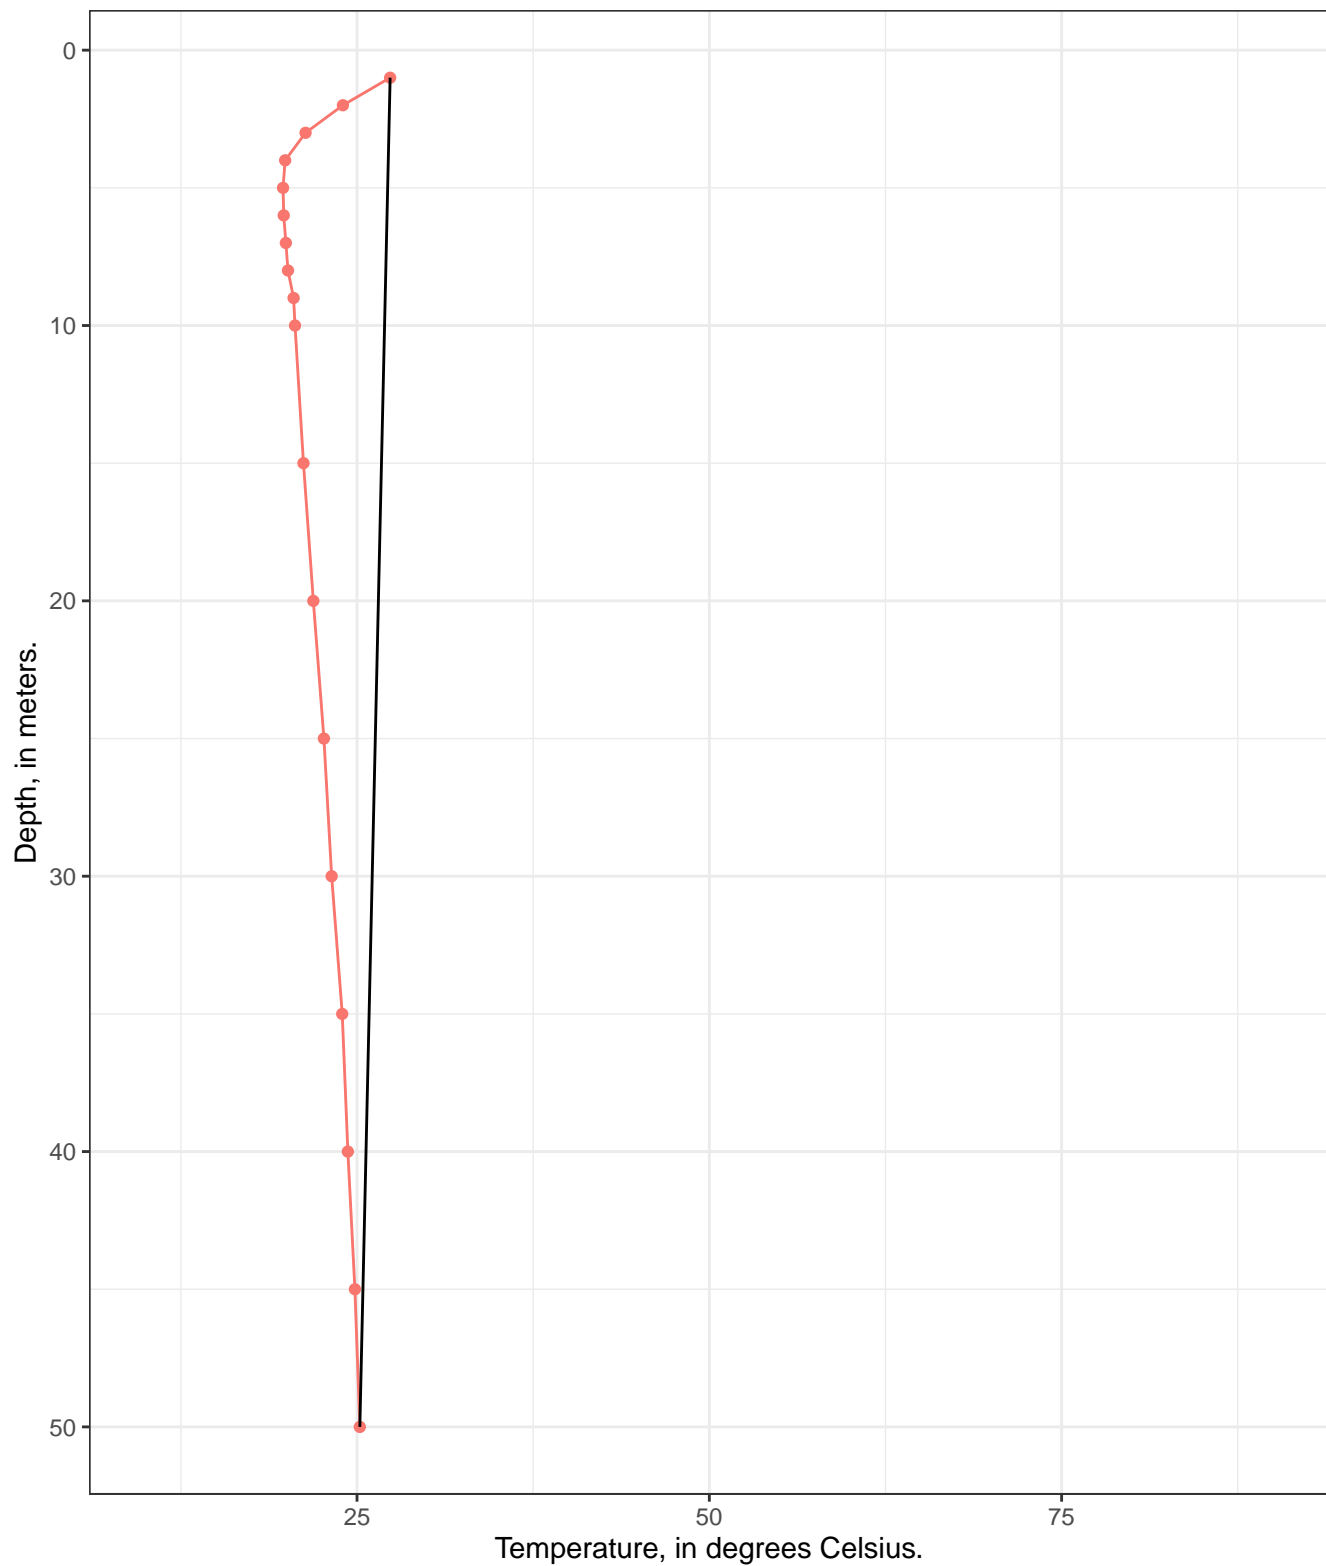

Measurement date 1984-08-08

ID: 283 [TG-151\_NMSUEI]

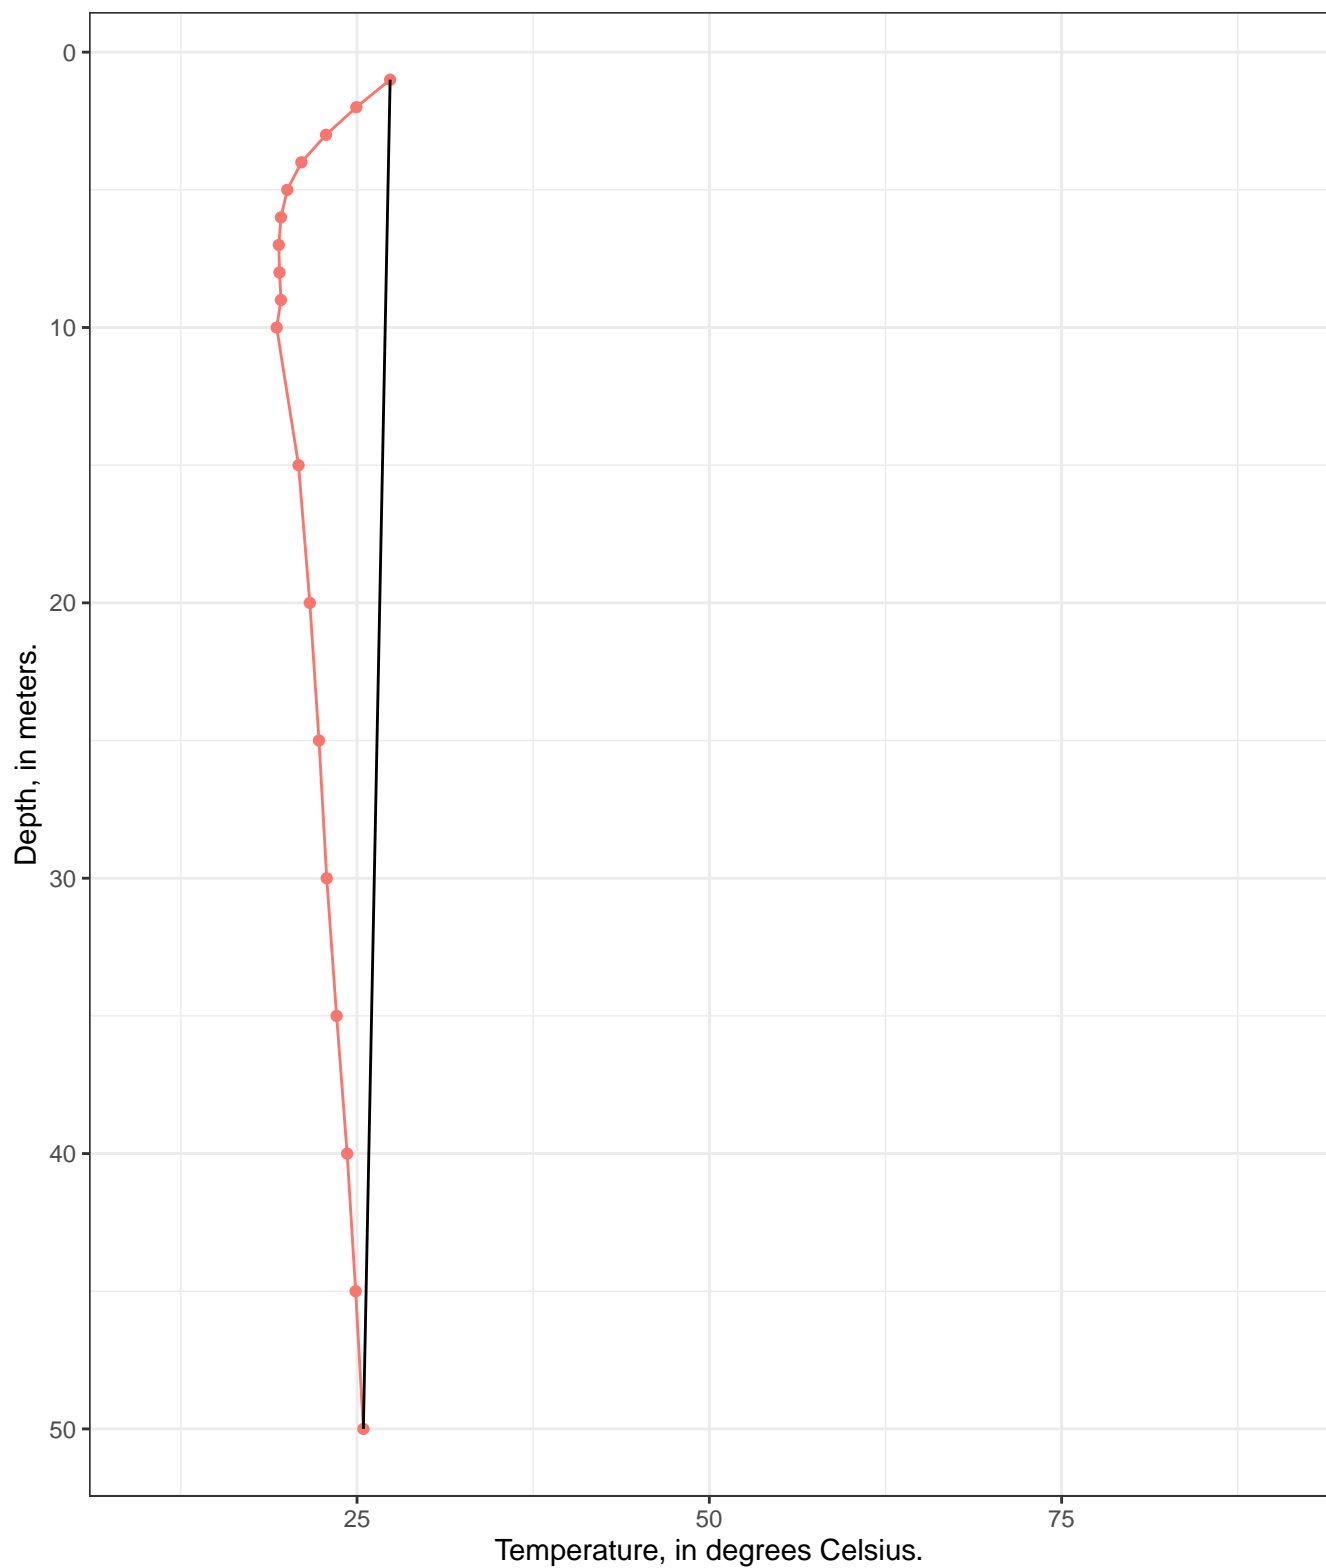

Measurement date 1984-08-01

ID: 284 [TG-153\_NMSUEI]

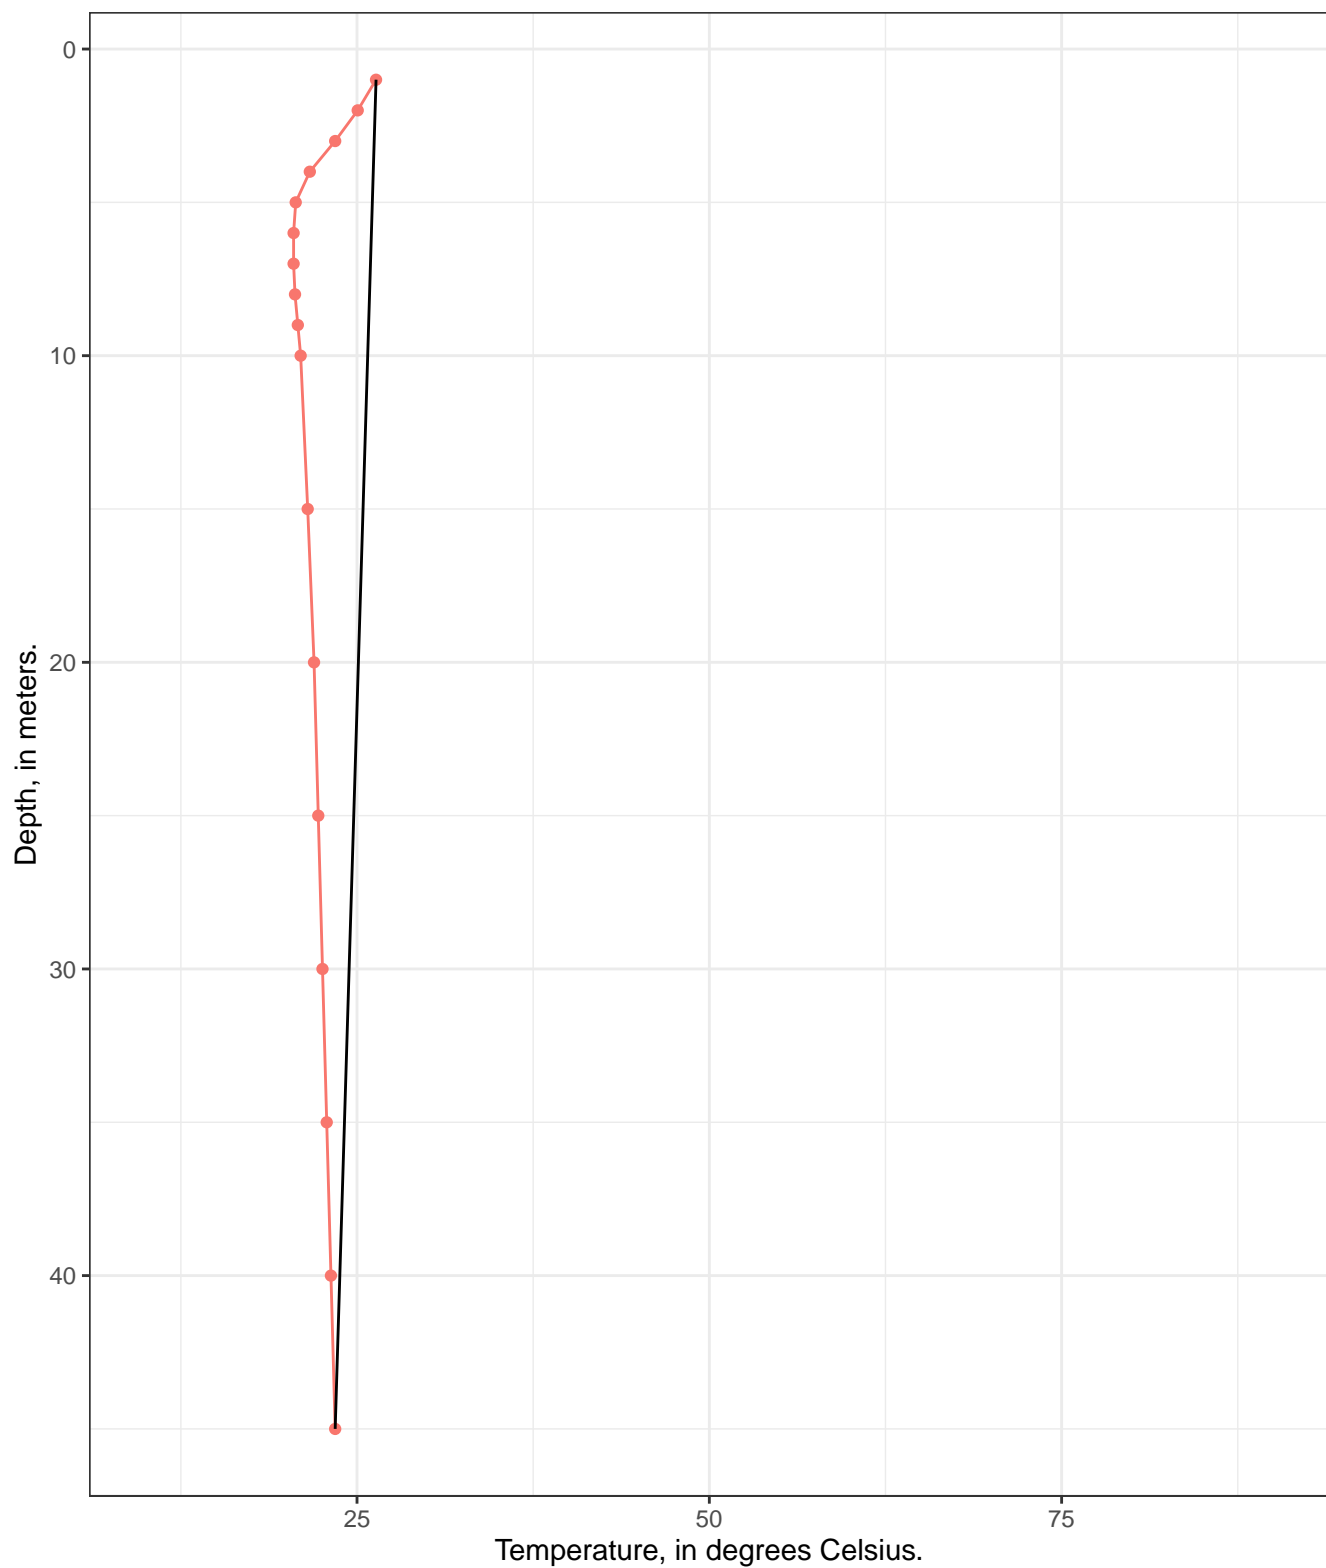

Measurement date 1984-08-19

ID: 285 [TG-154\_NMSUEI]

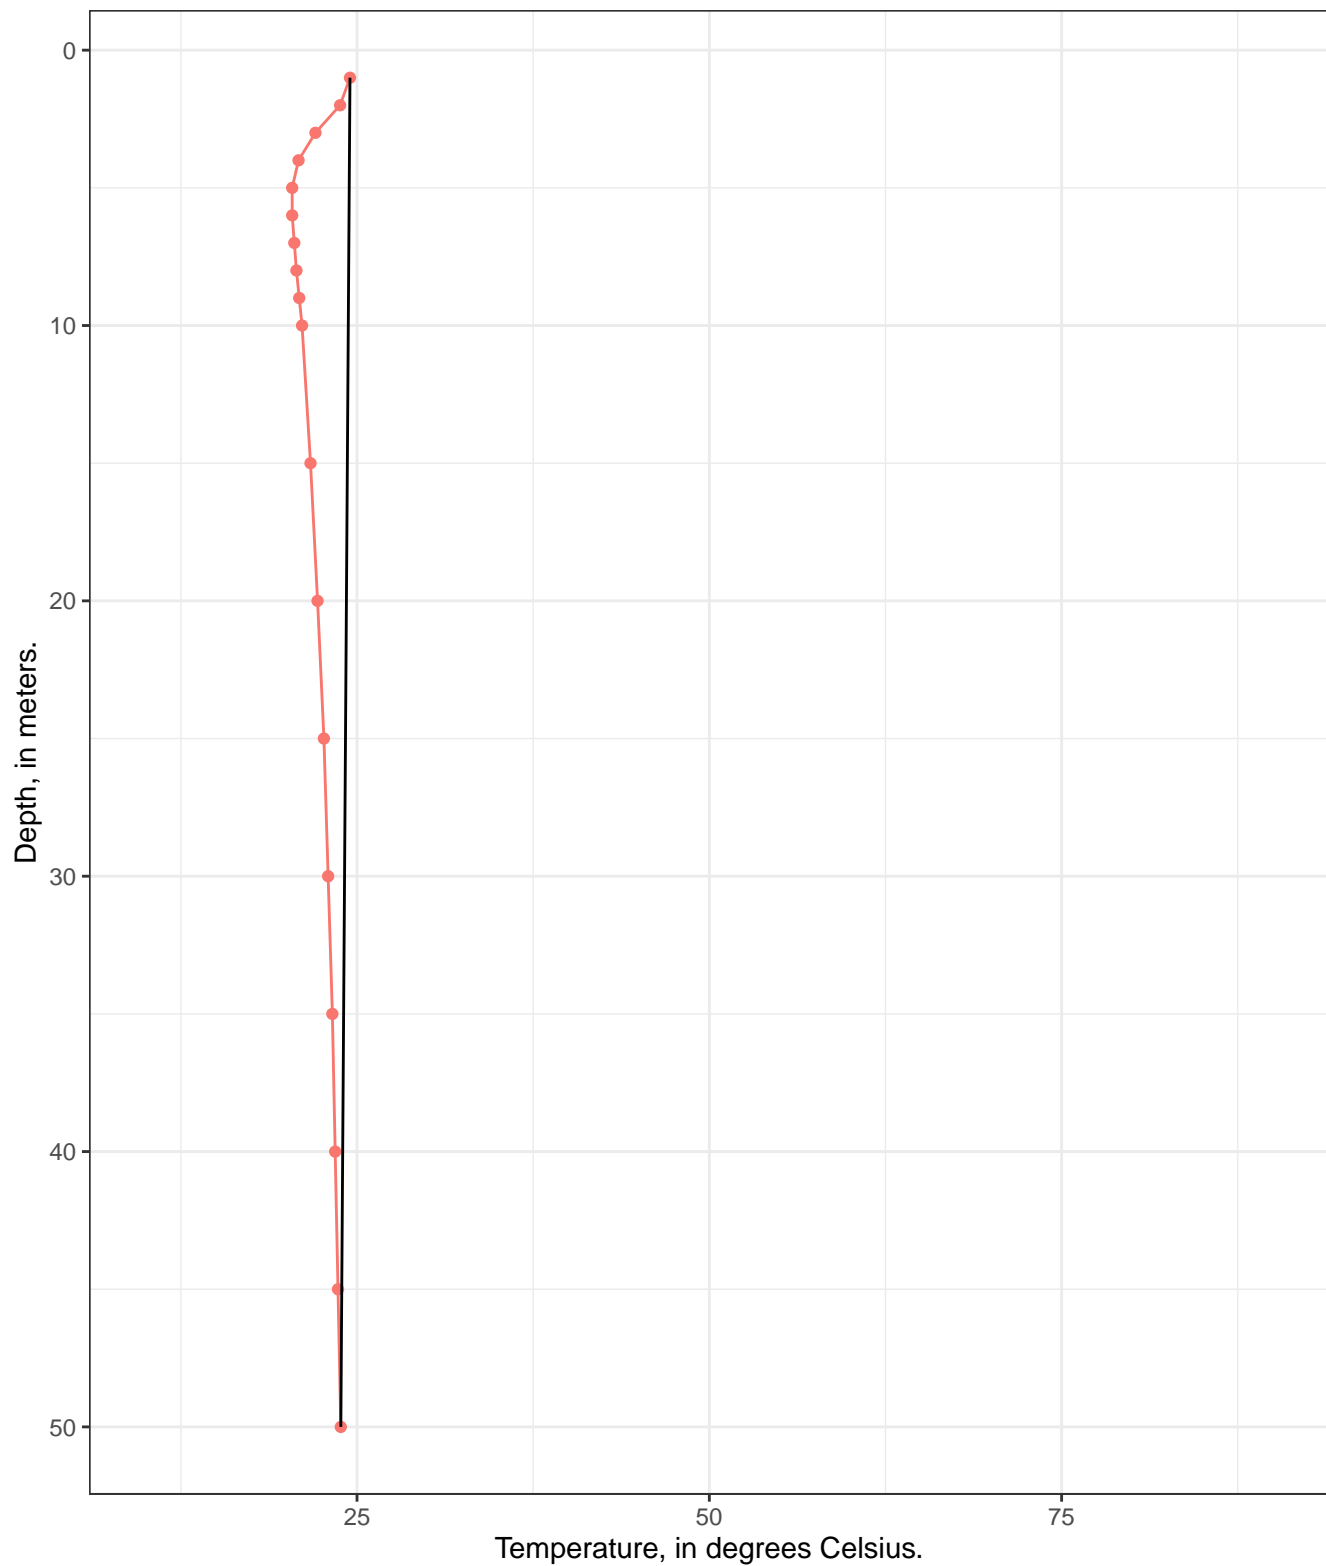

Measurement date 1984-08-18

ID: 286 [TG-155\_NMSUEI]

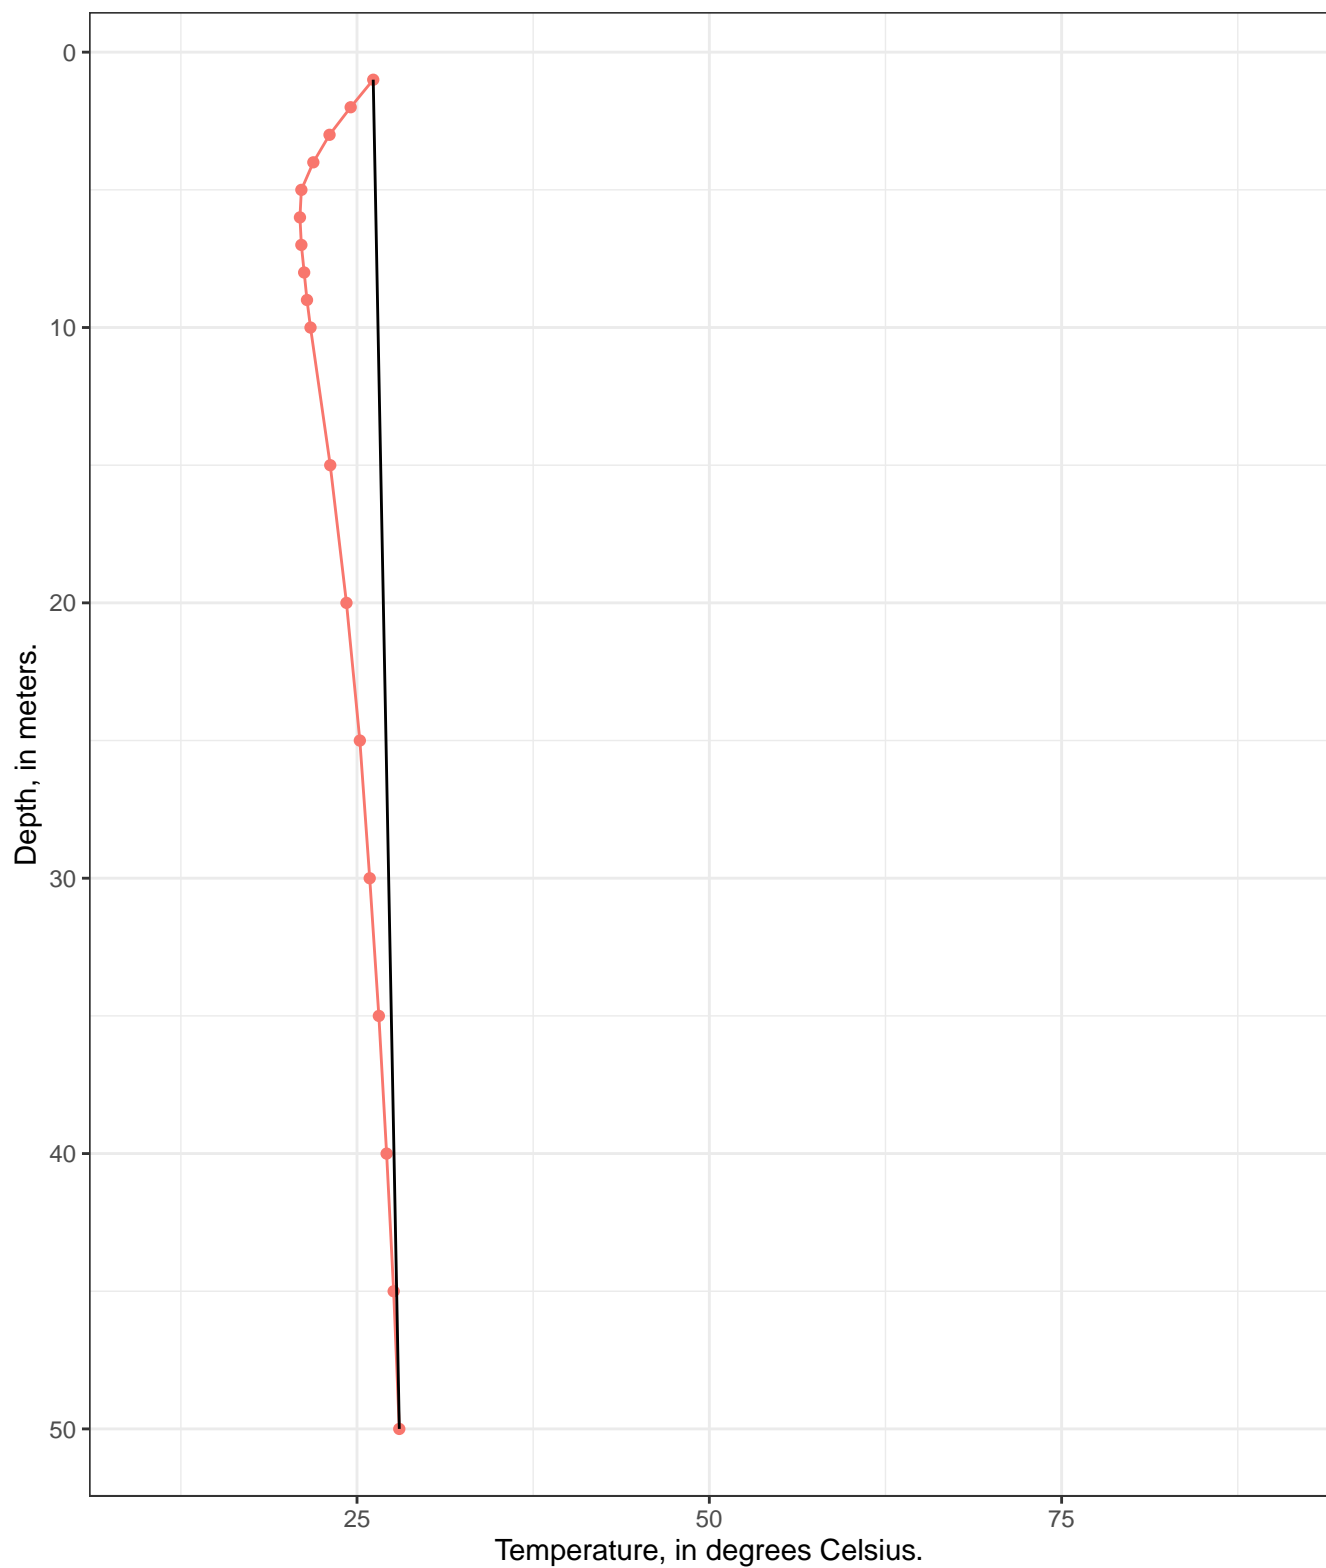

Measurement date 1984-08-14

ID: 287 [TG-156\_NMSUEI]

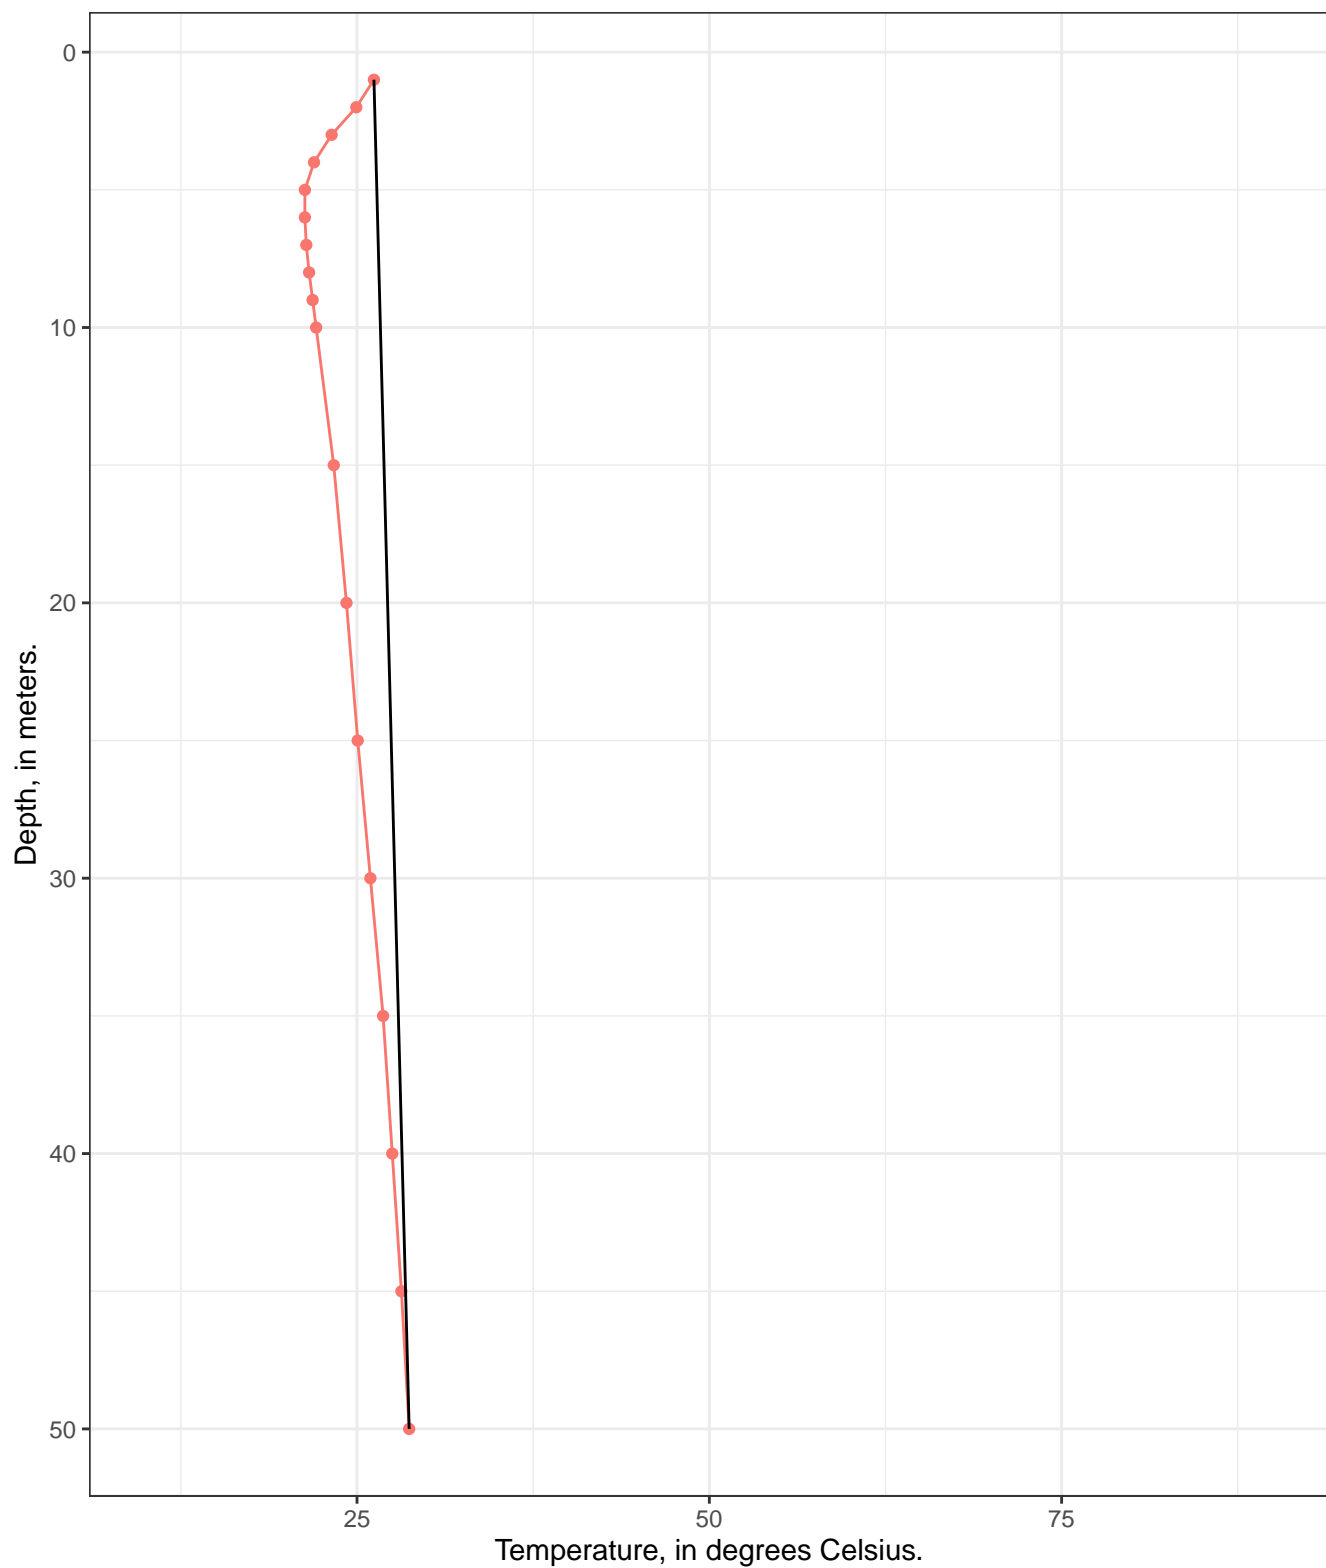

Measurement date 1984-08-14



ID: 288 [TG-157\_NMSUEI]

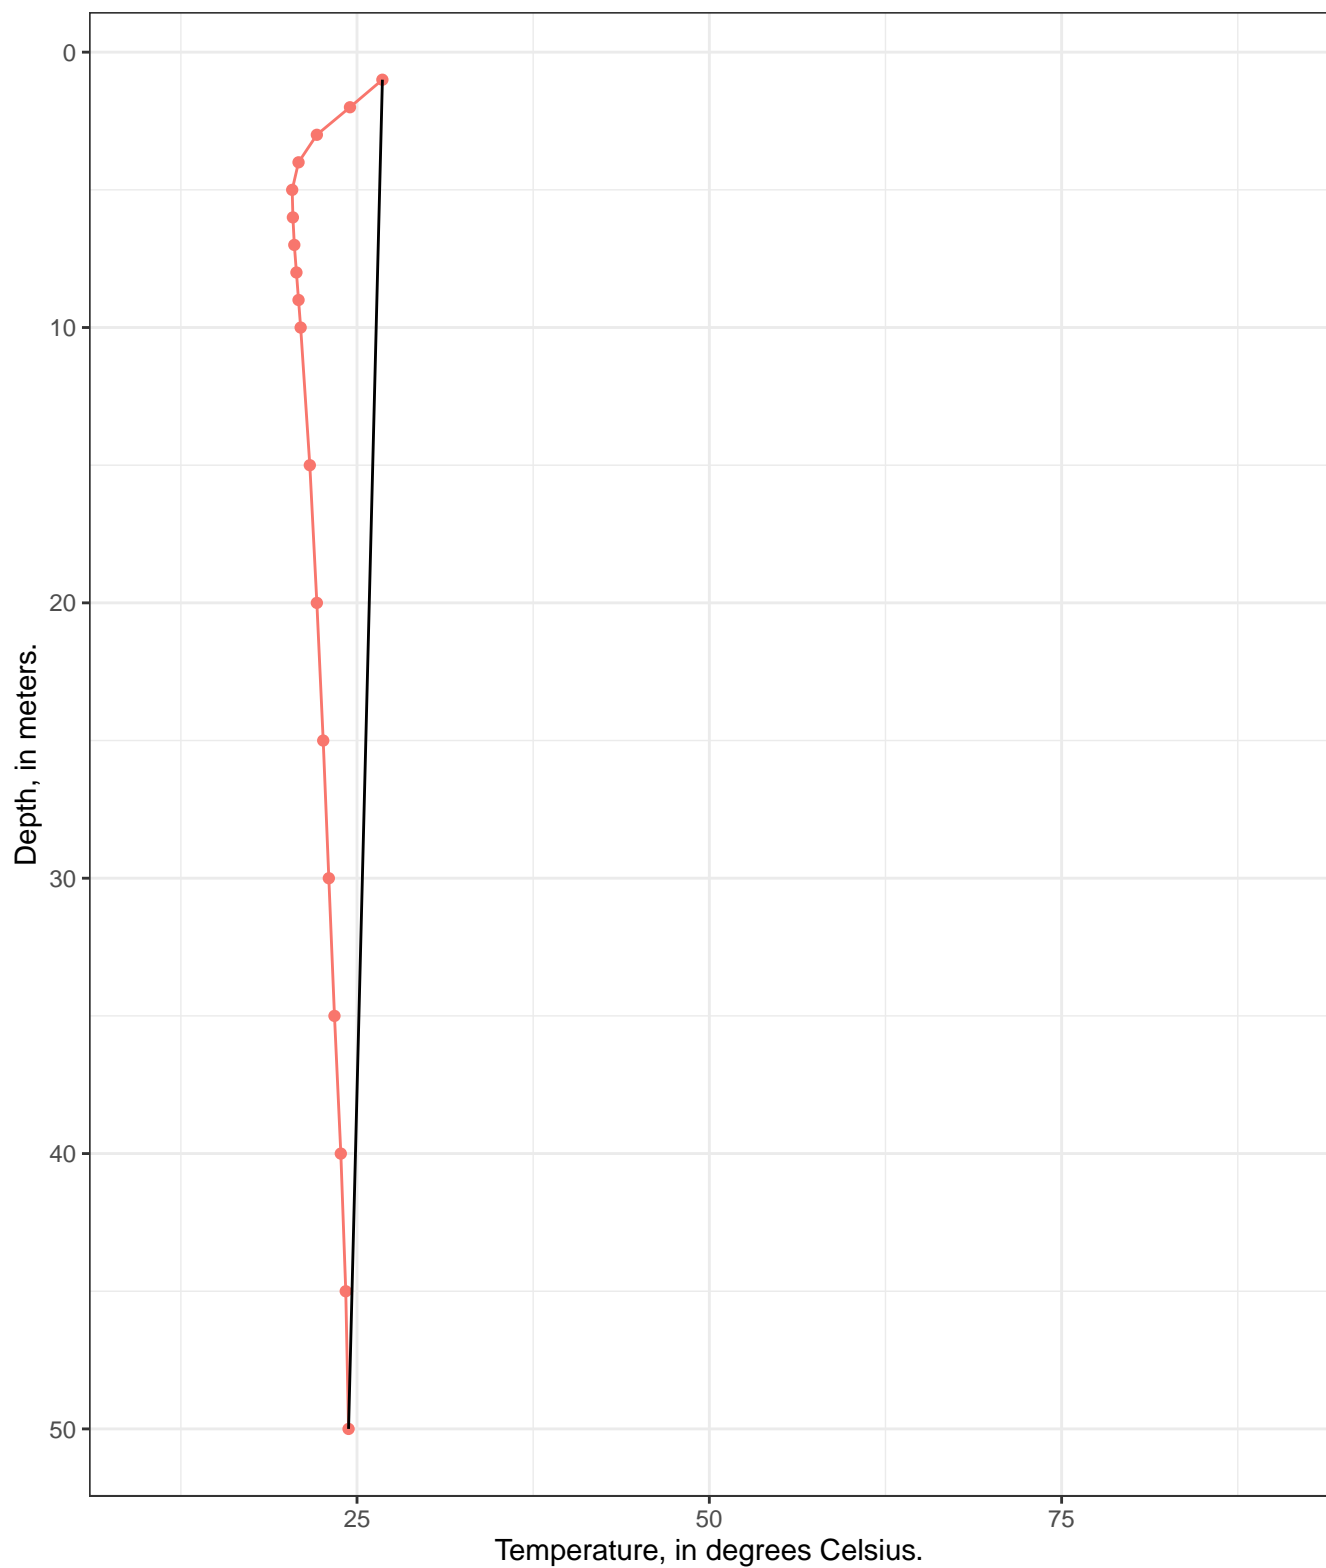

Measurement date 1984-08-12

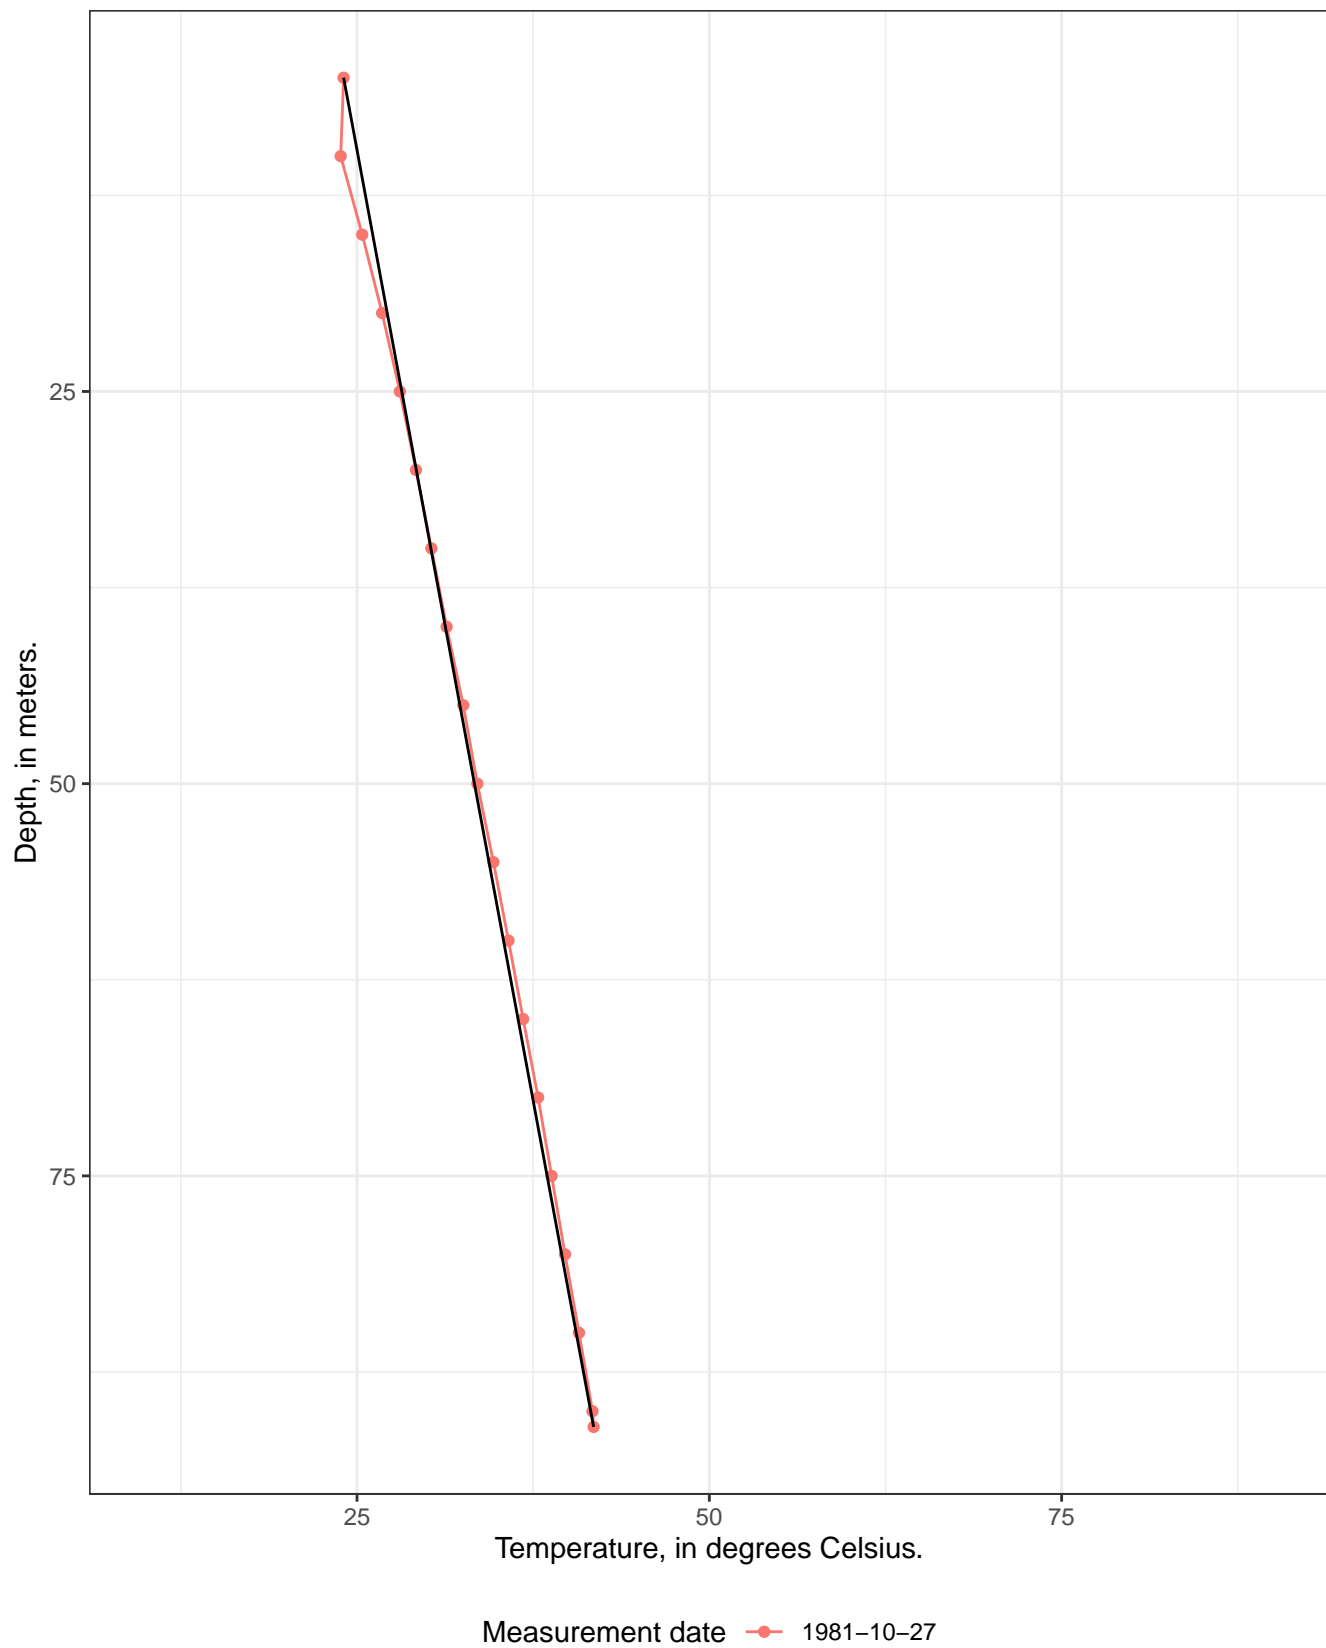

ID: 290 [TG-26\_NMSUEI]

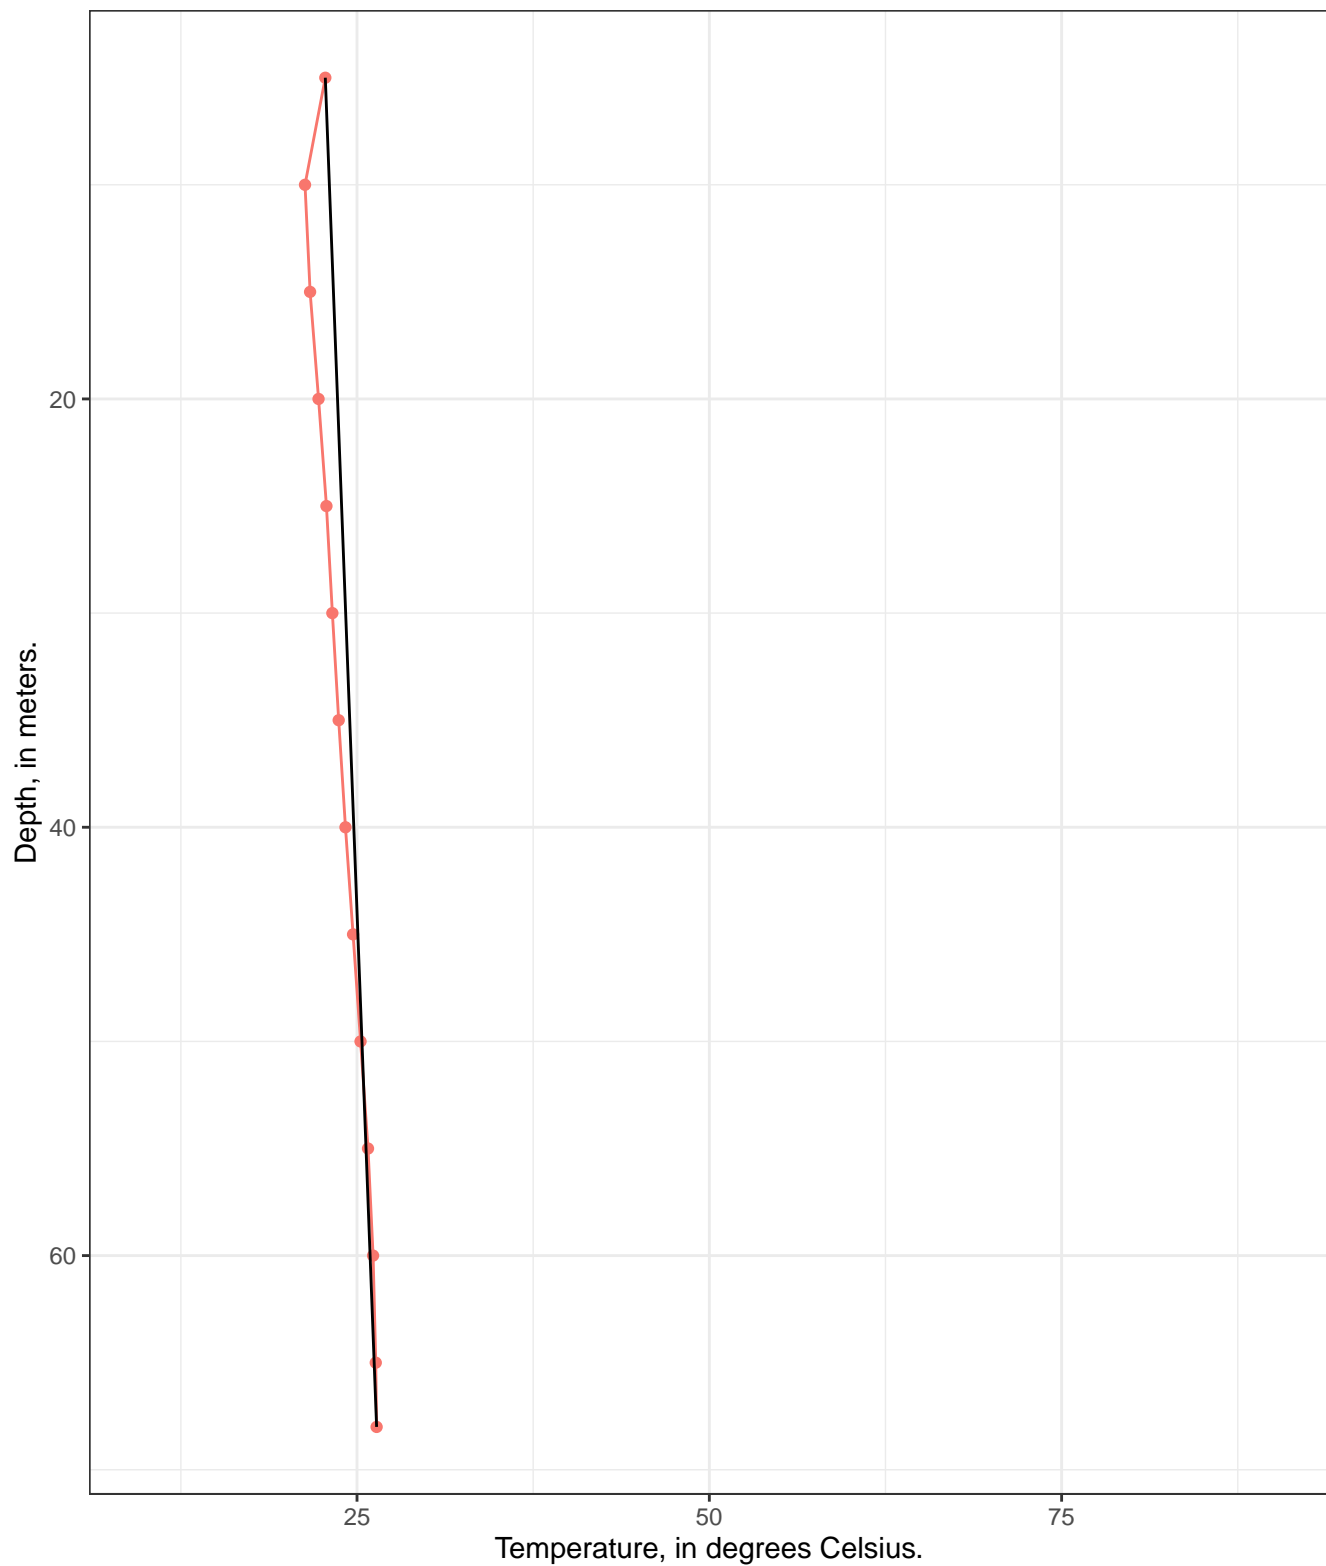

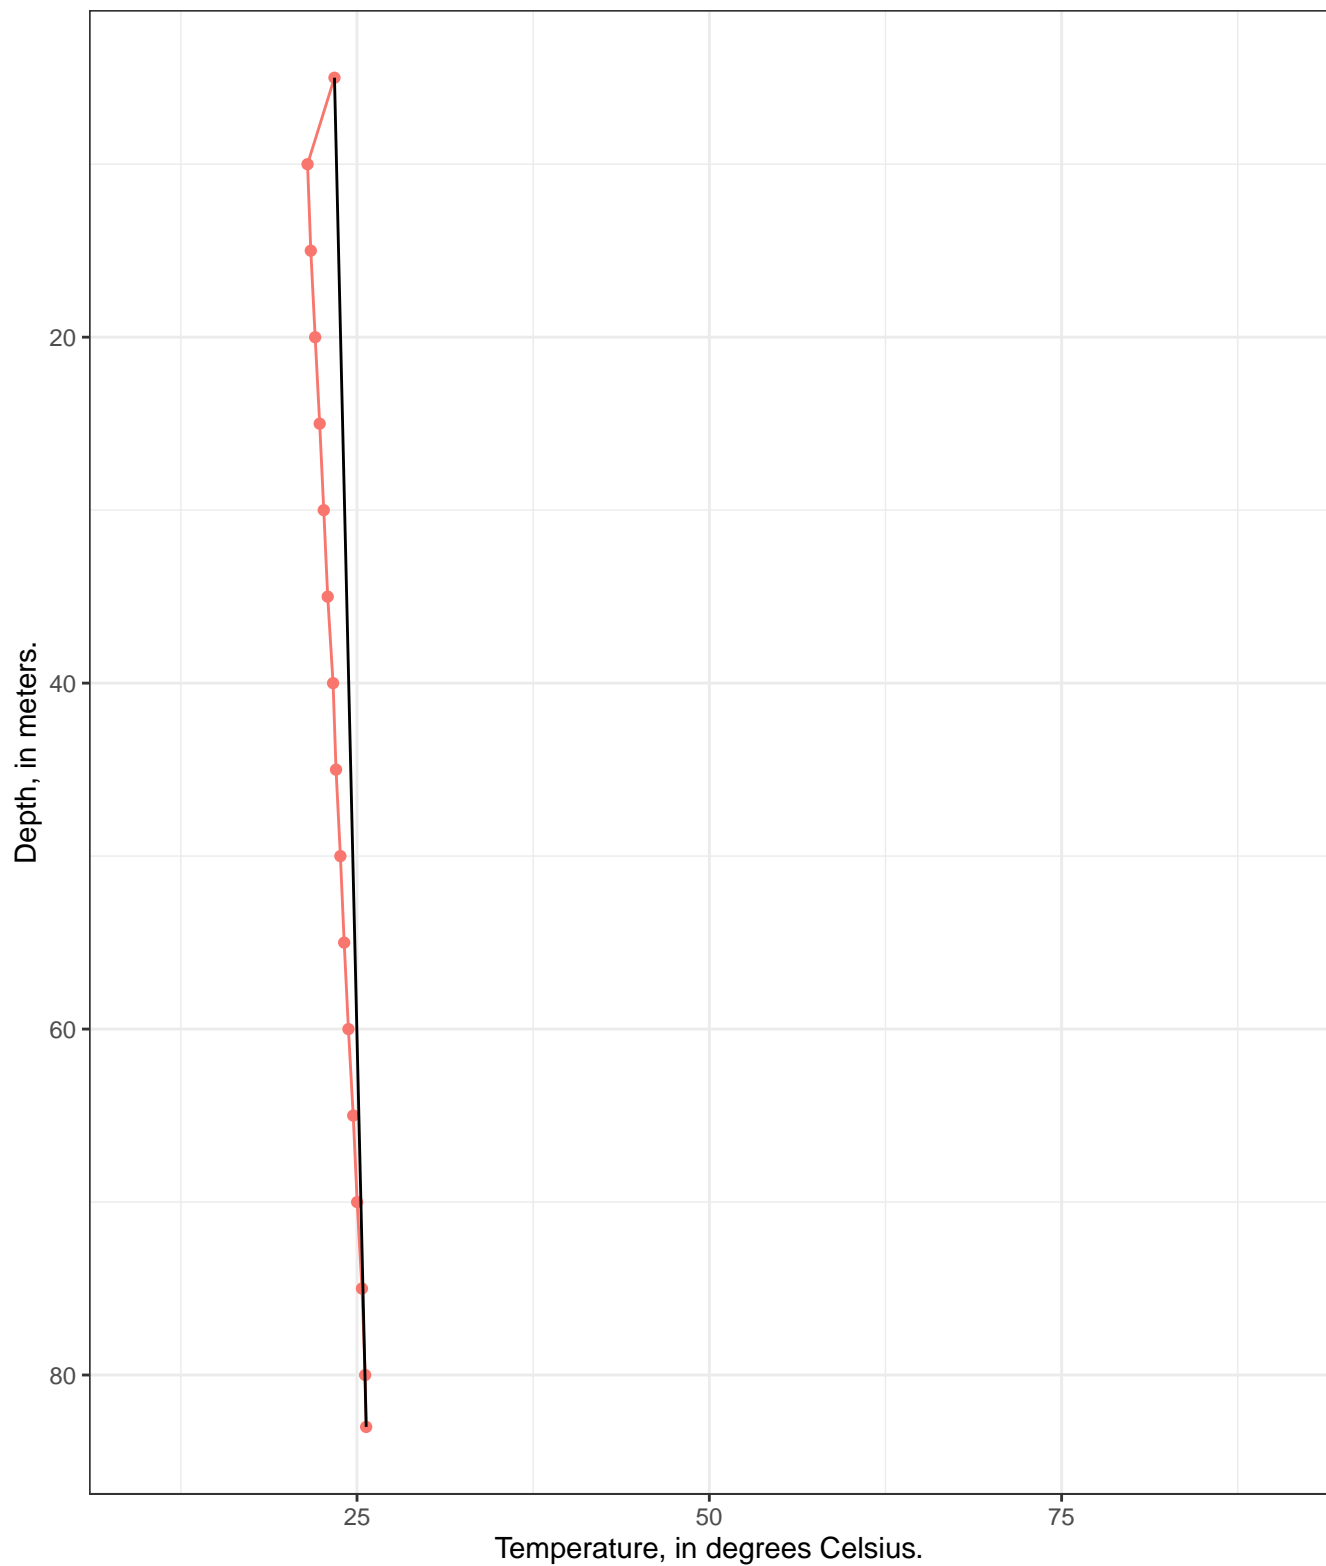

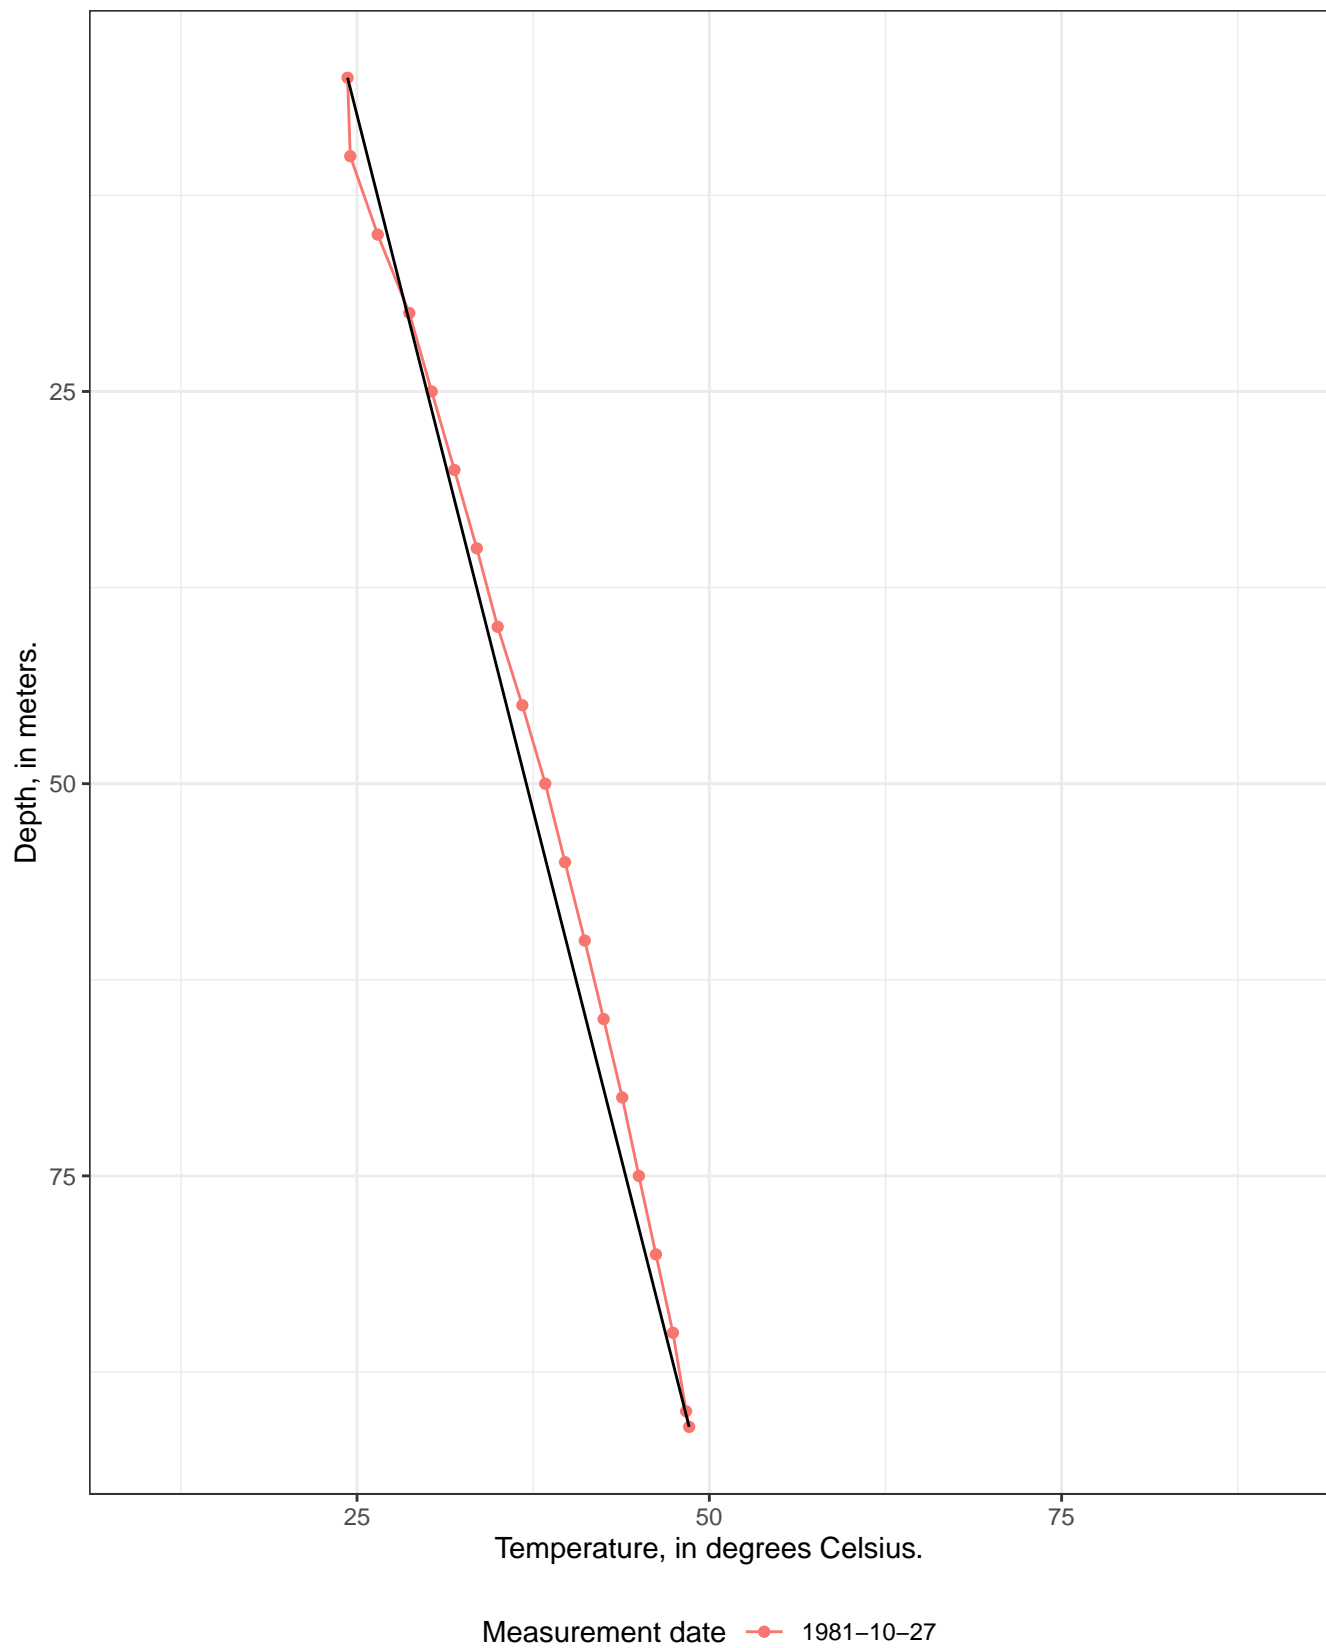

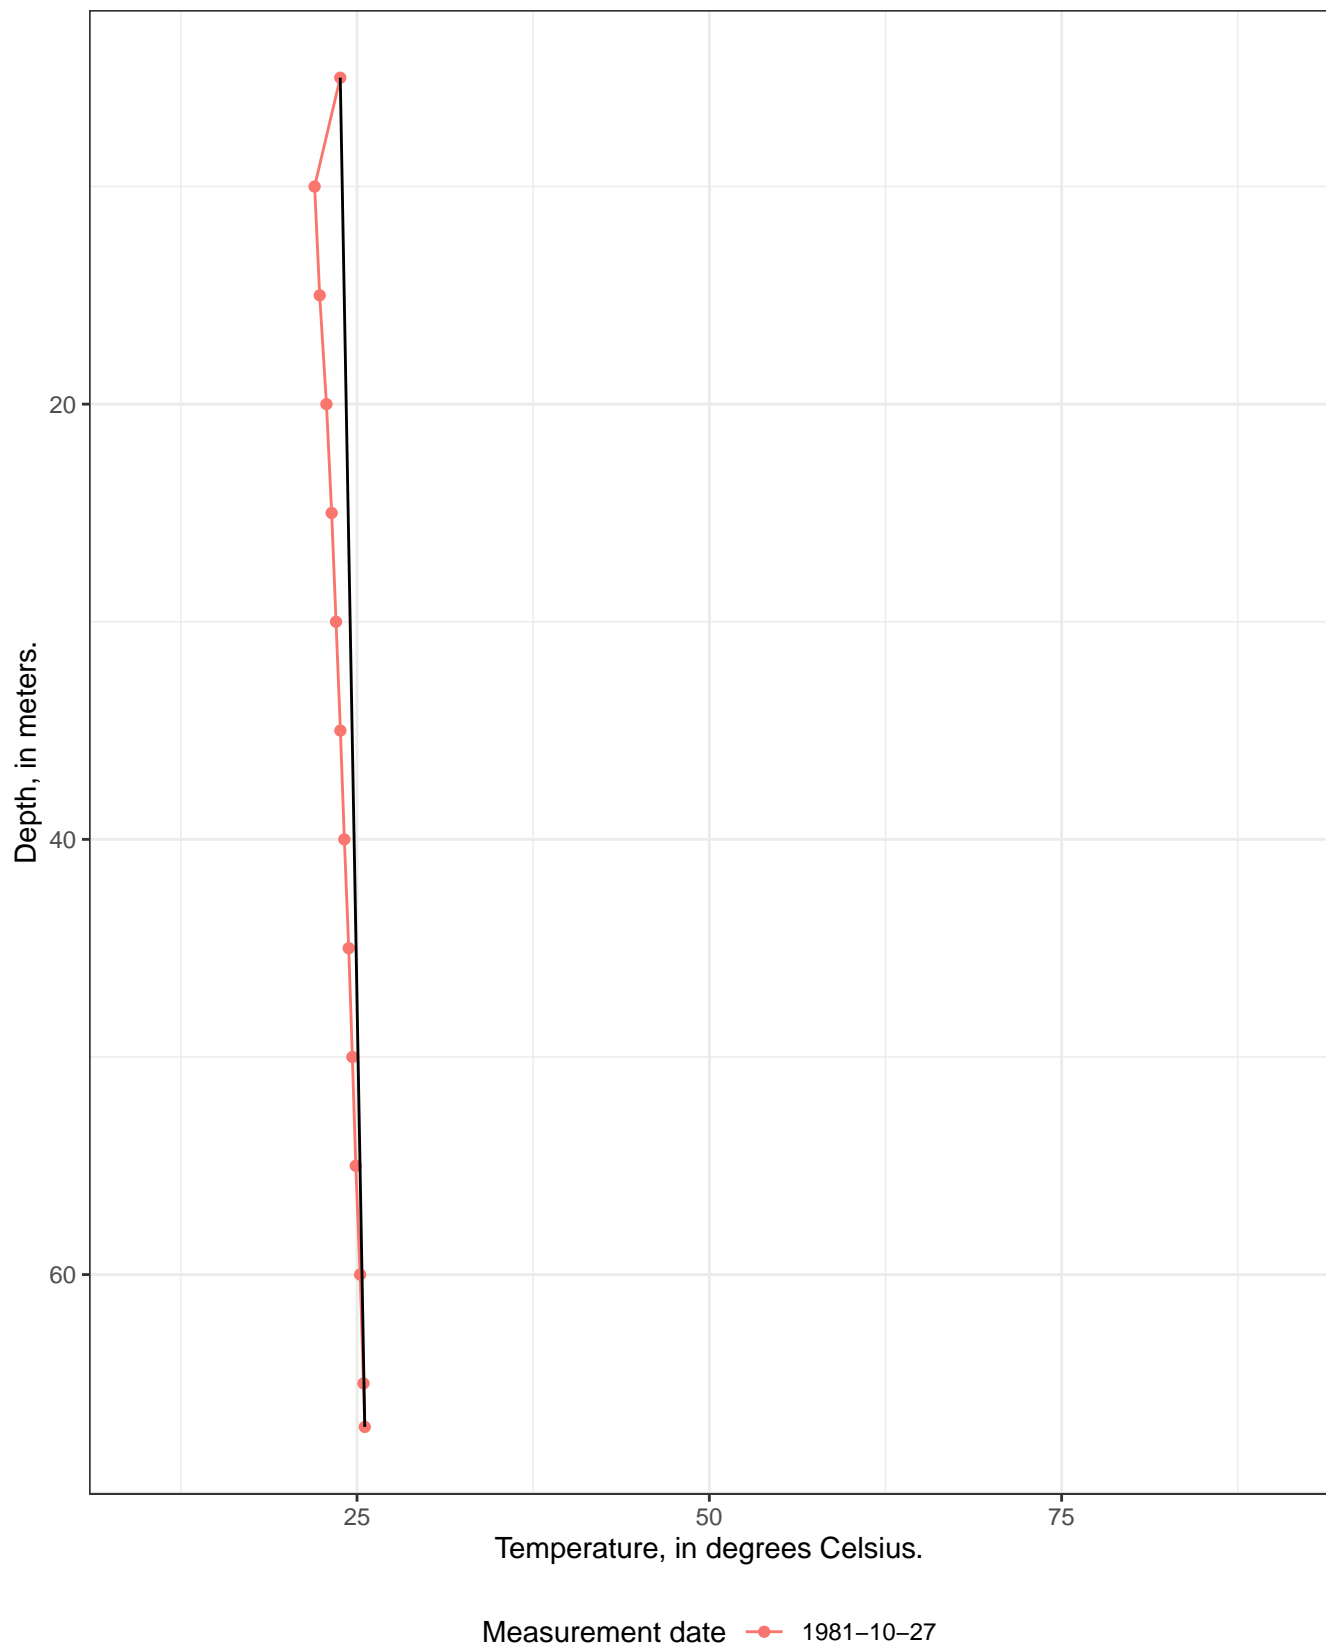

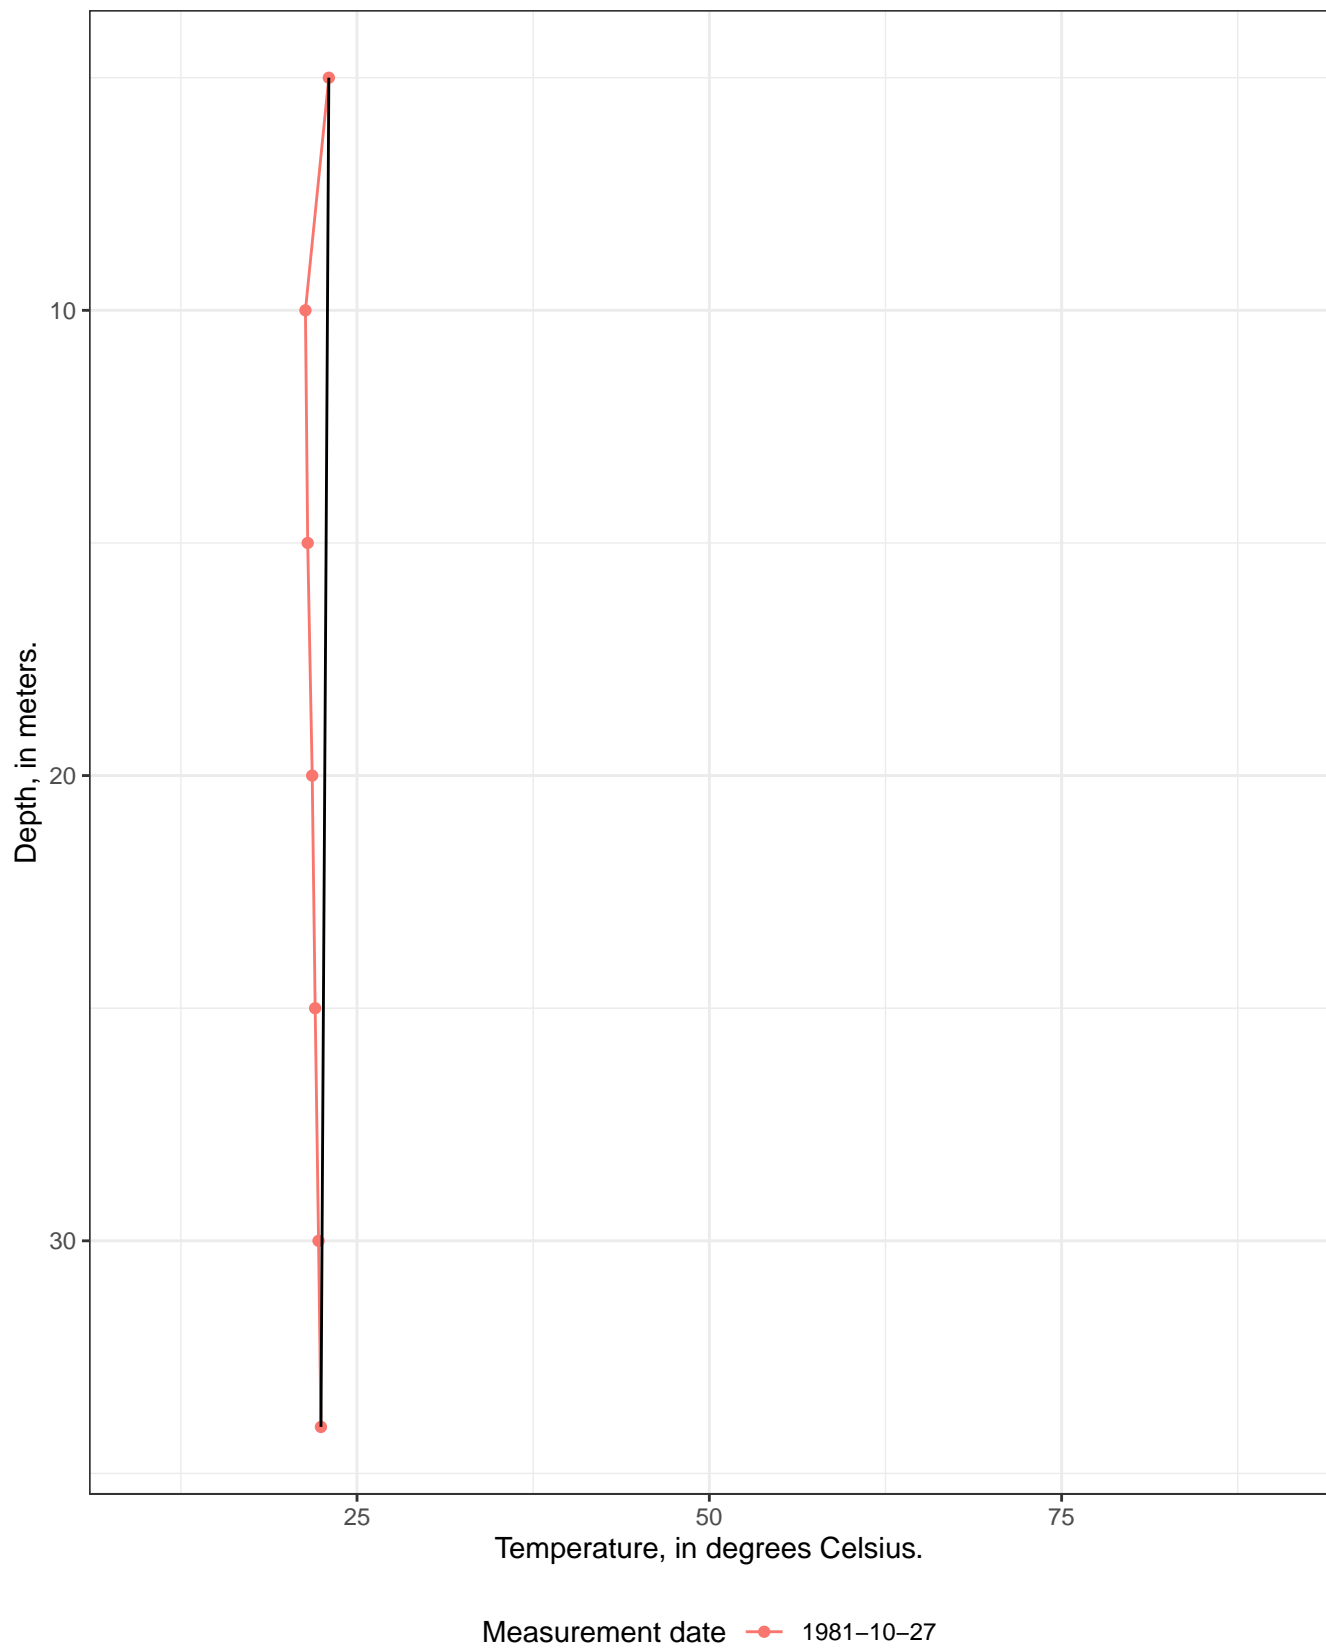

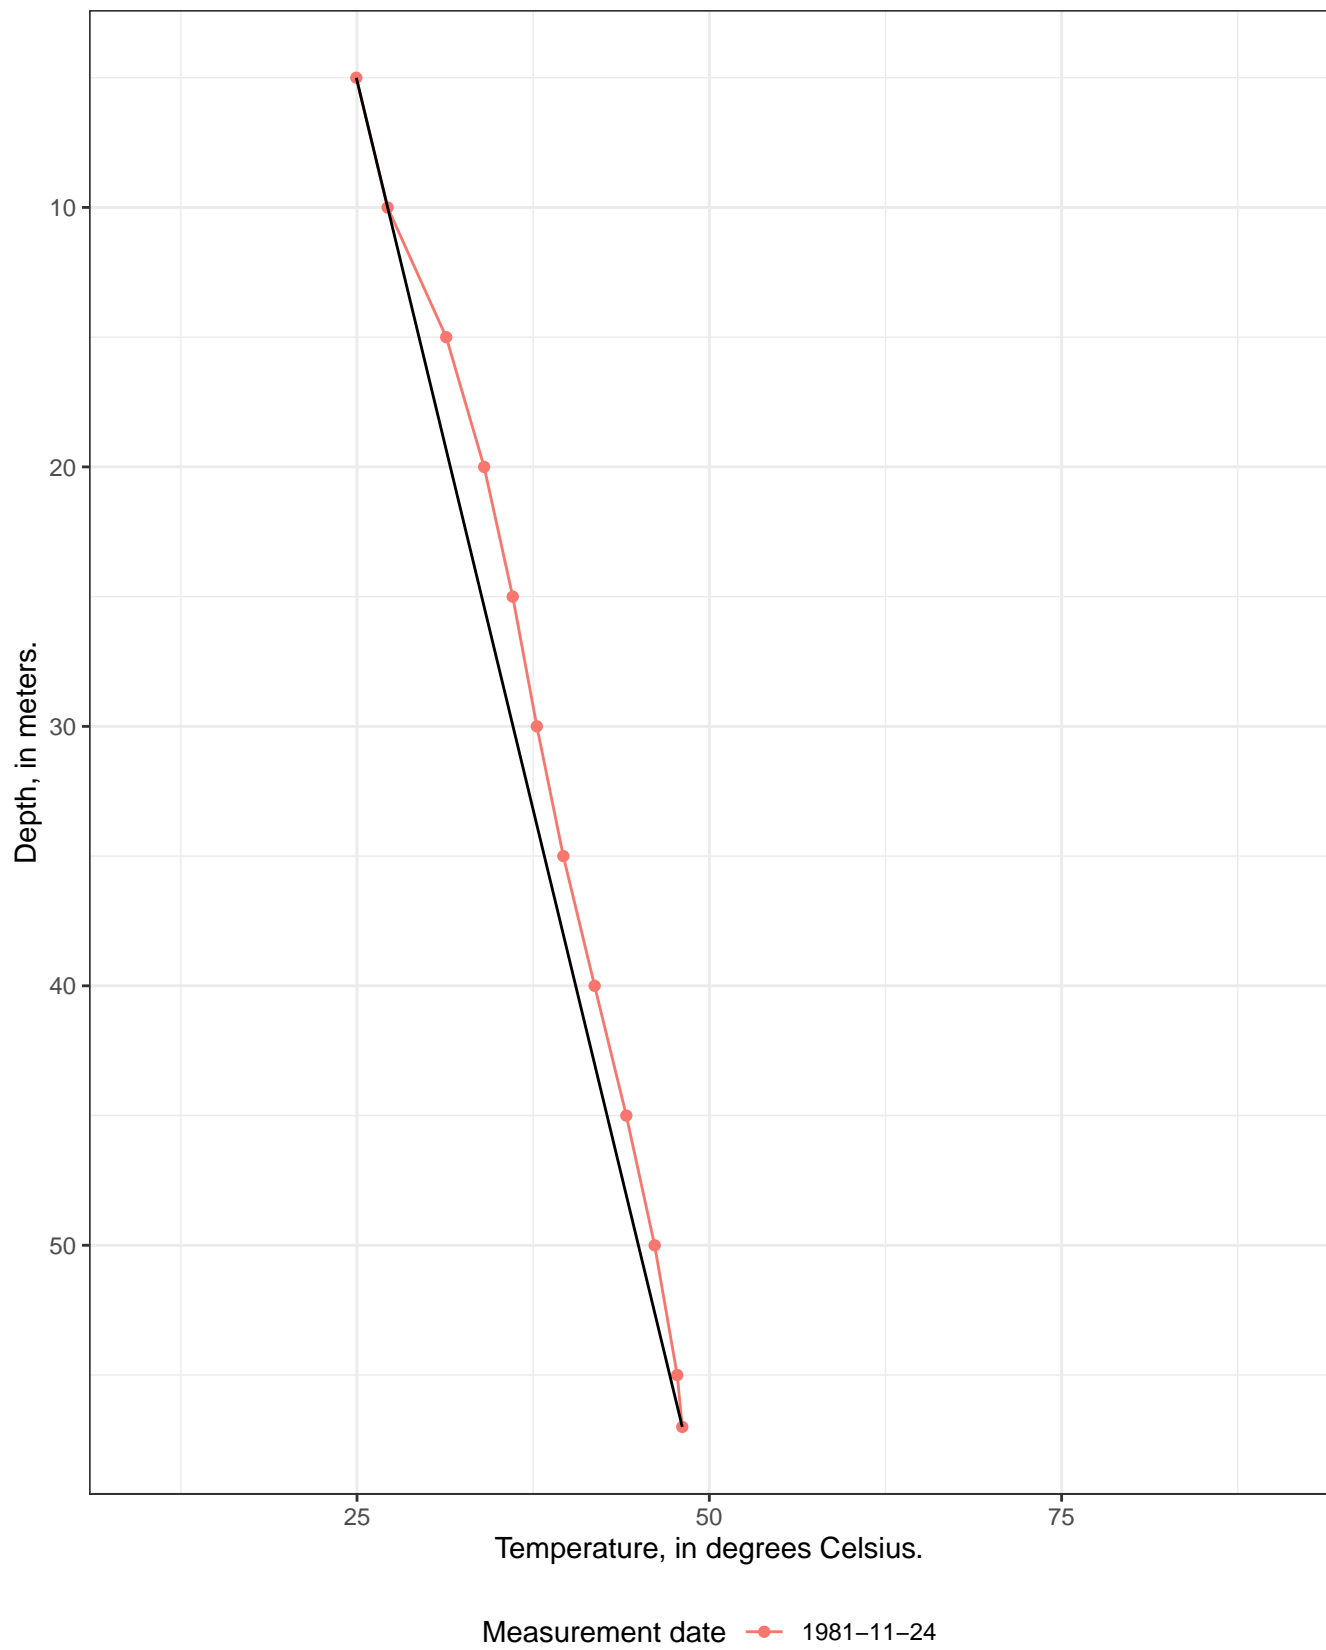



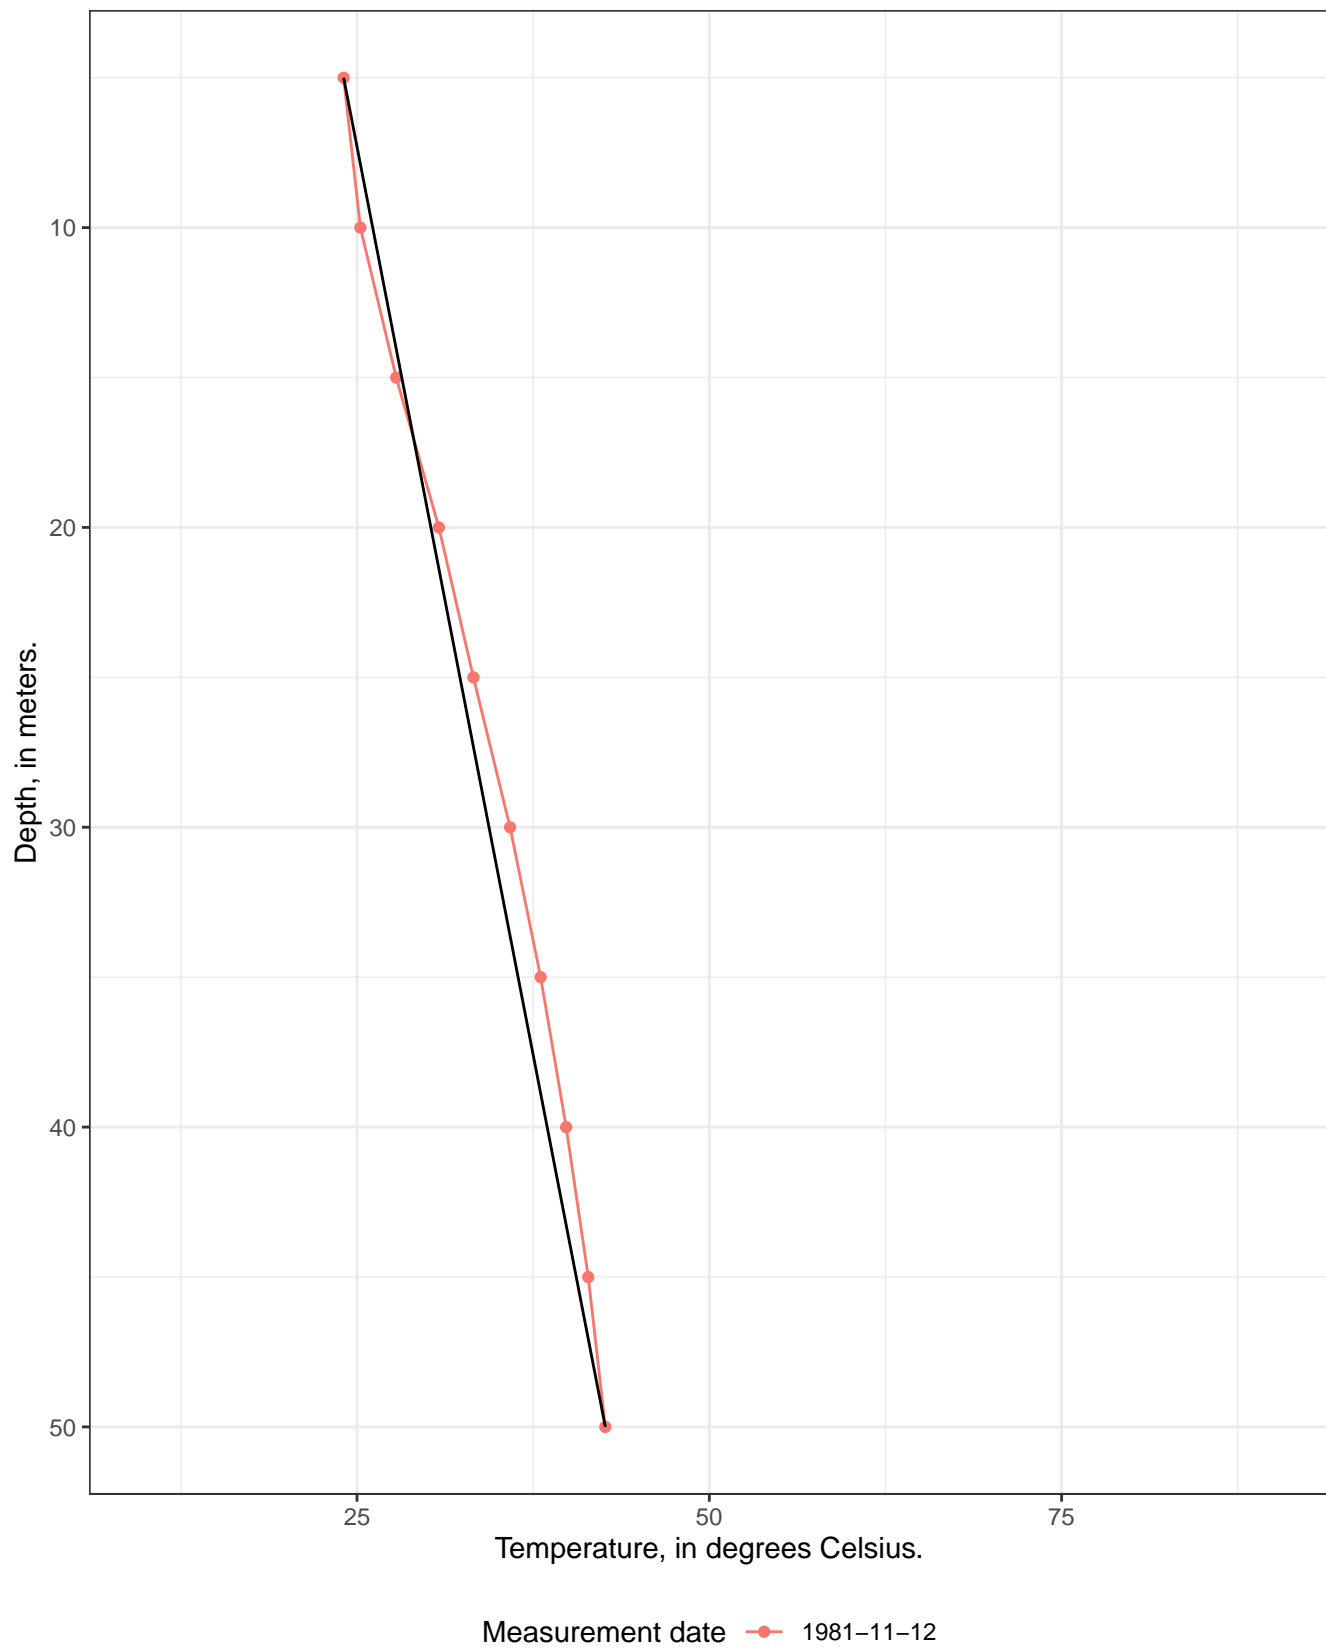

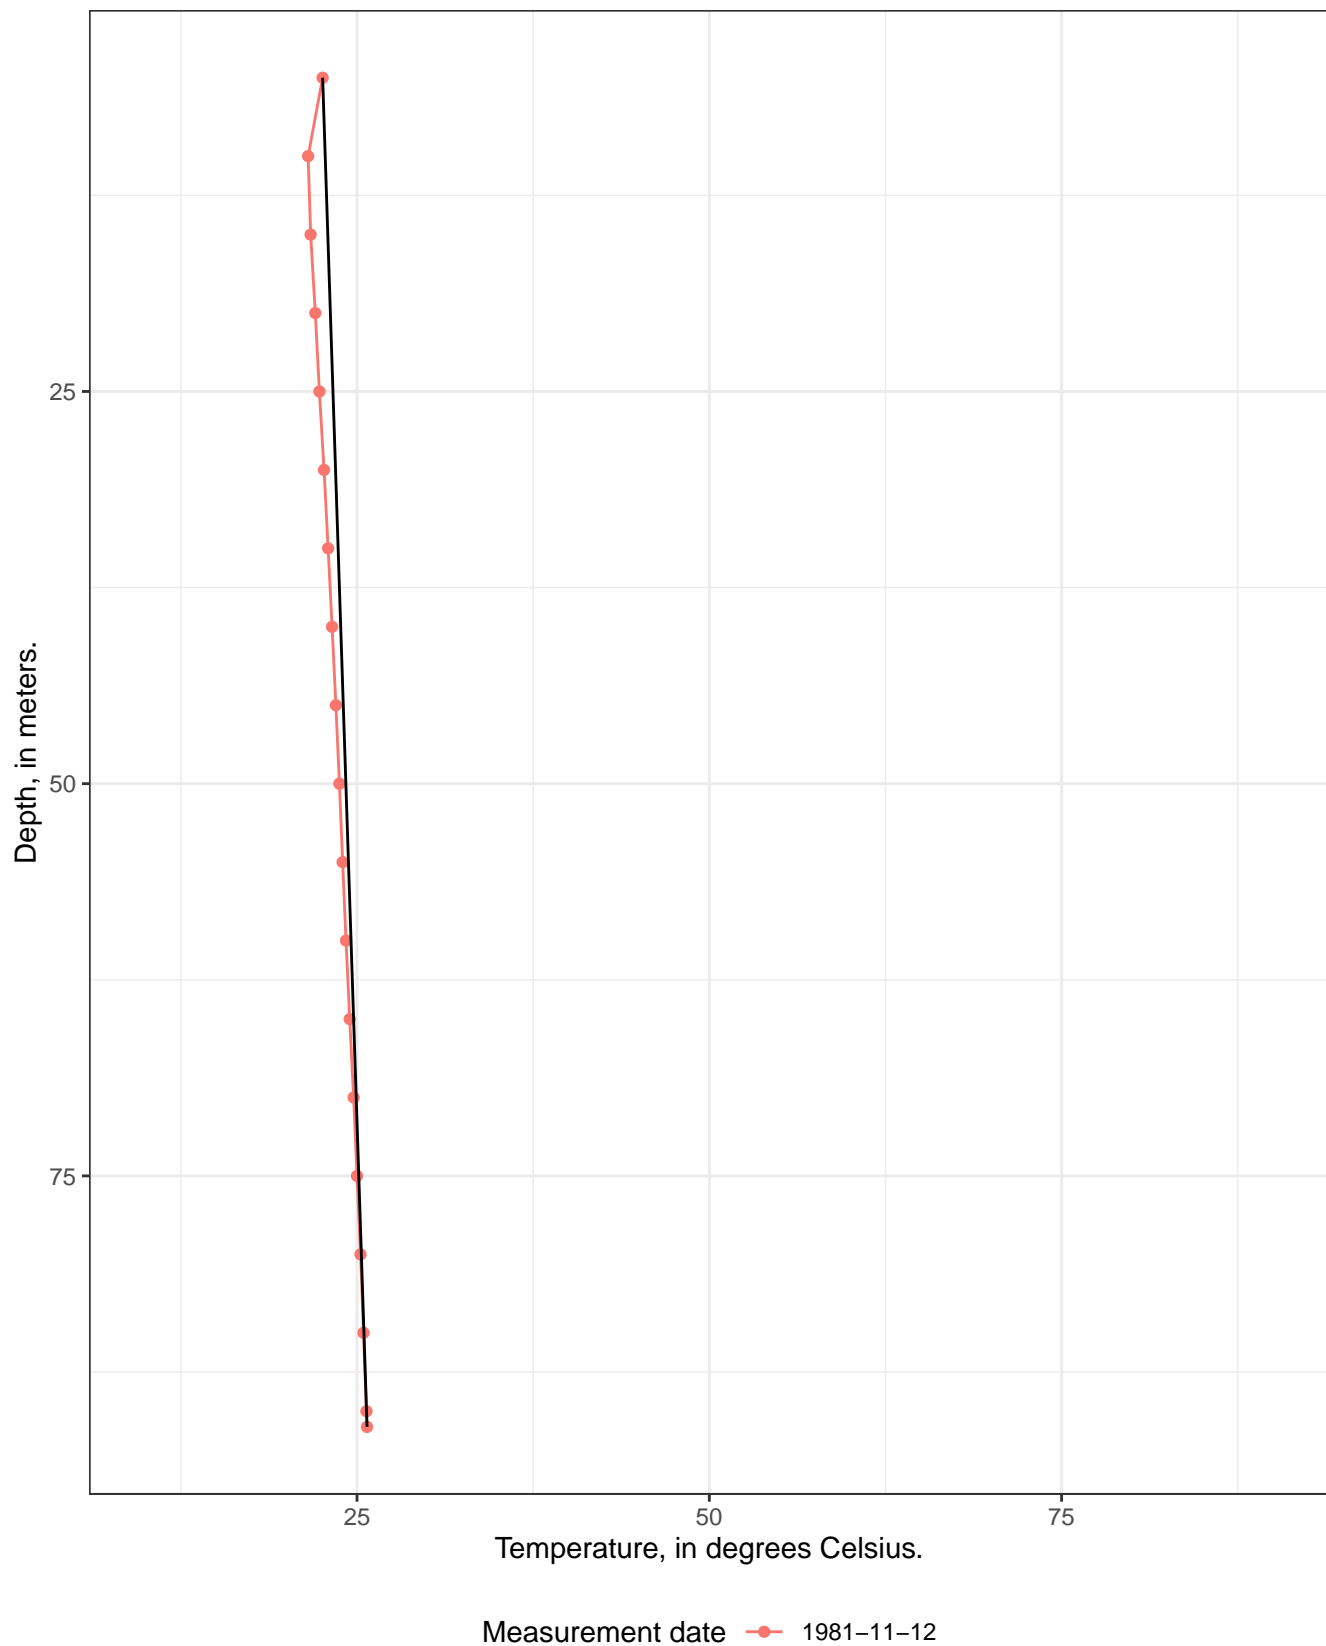

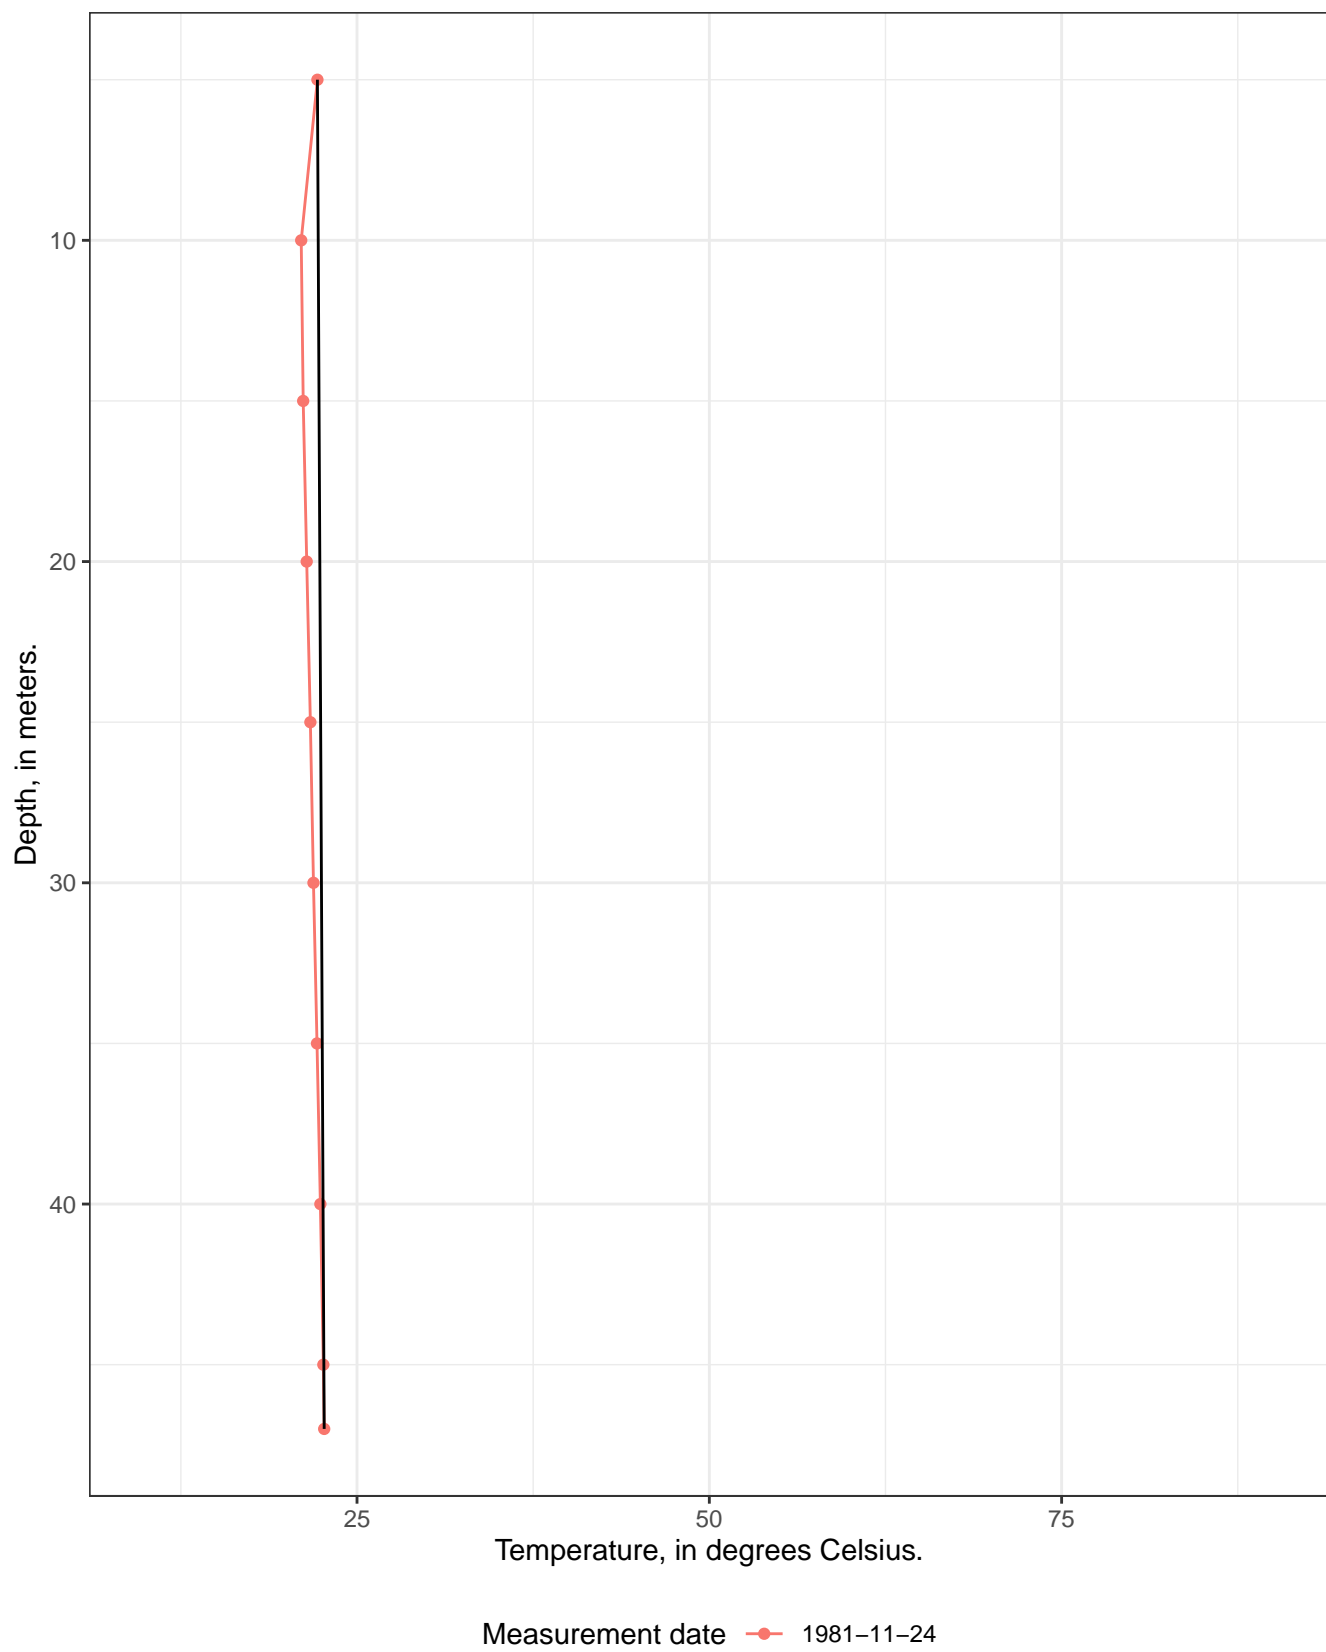

ID: 299 [TG-36\_NMSUEI]

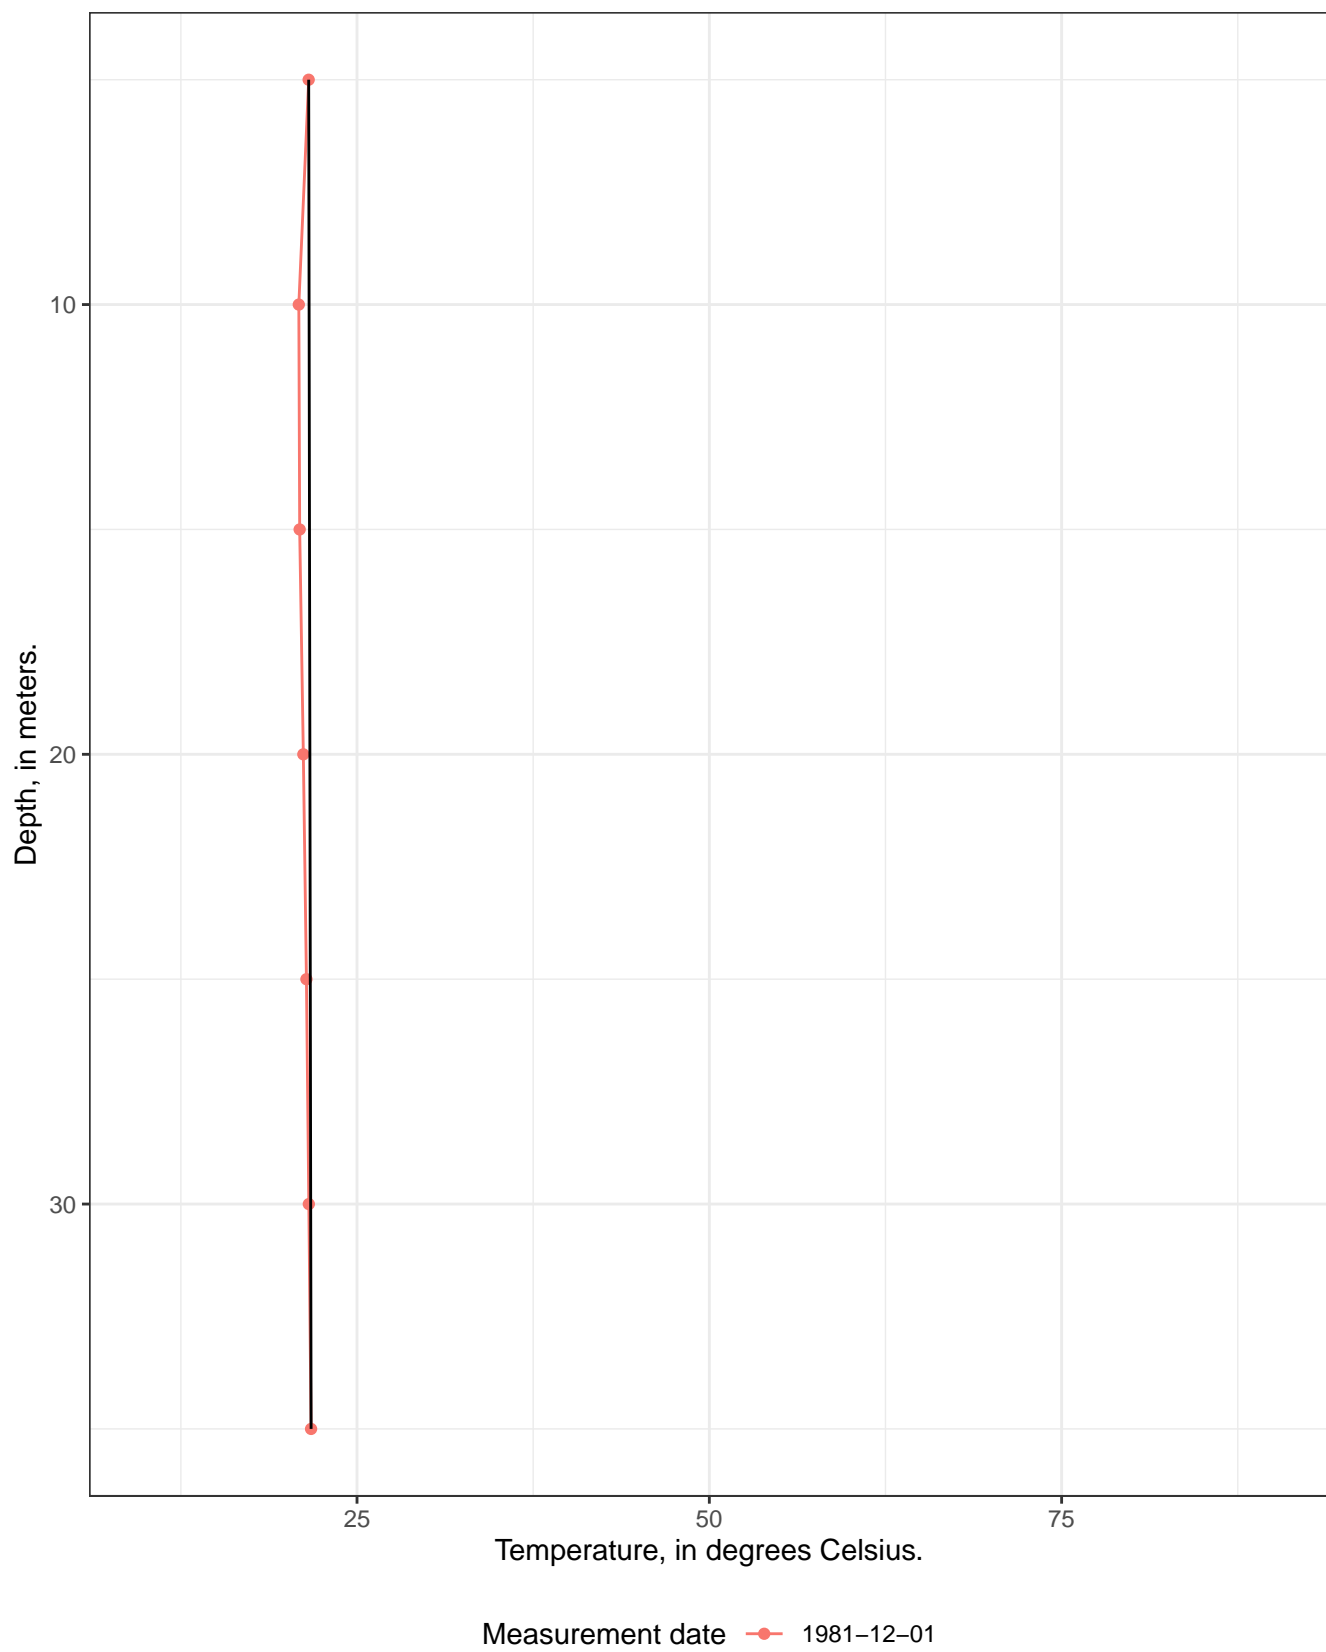

ID: 300 [TG-38\_NMSUEI]

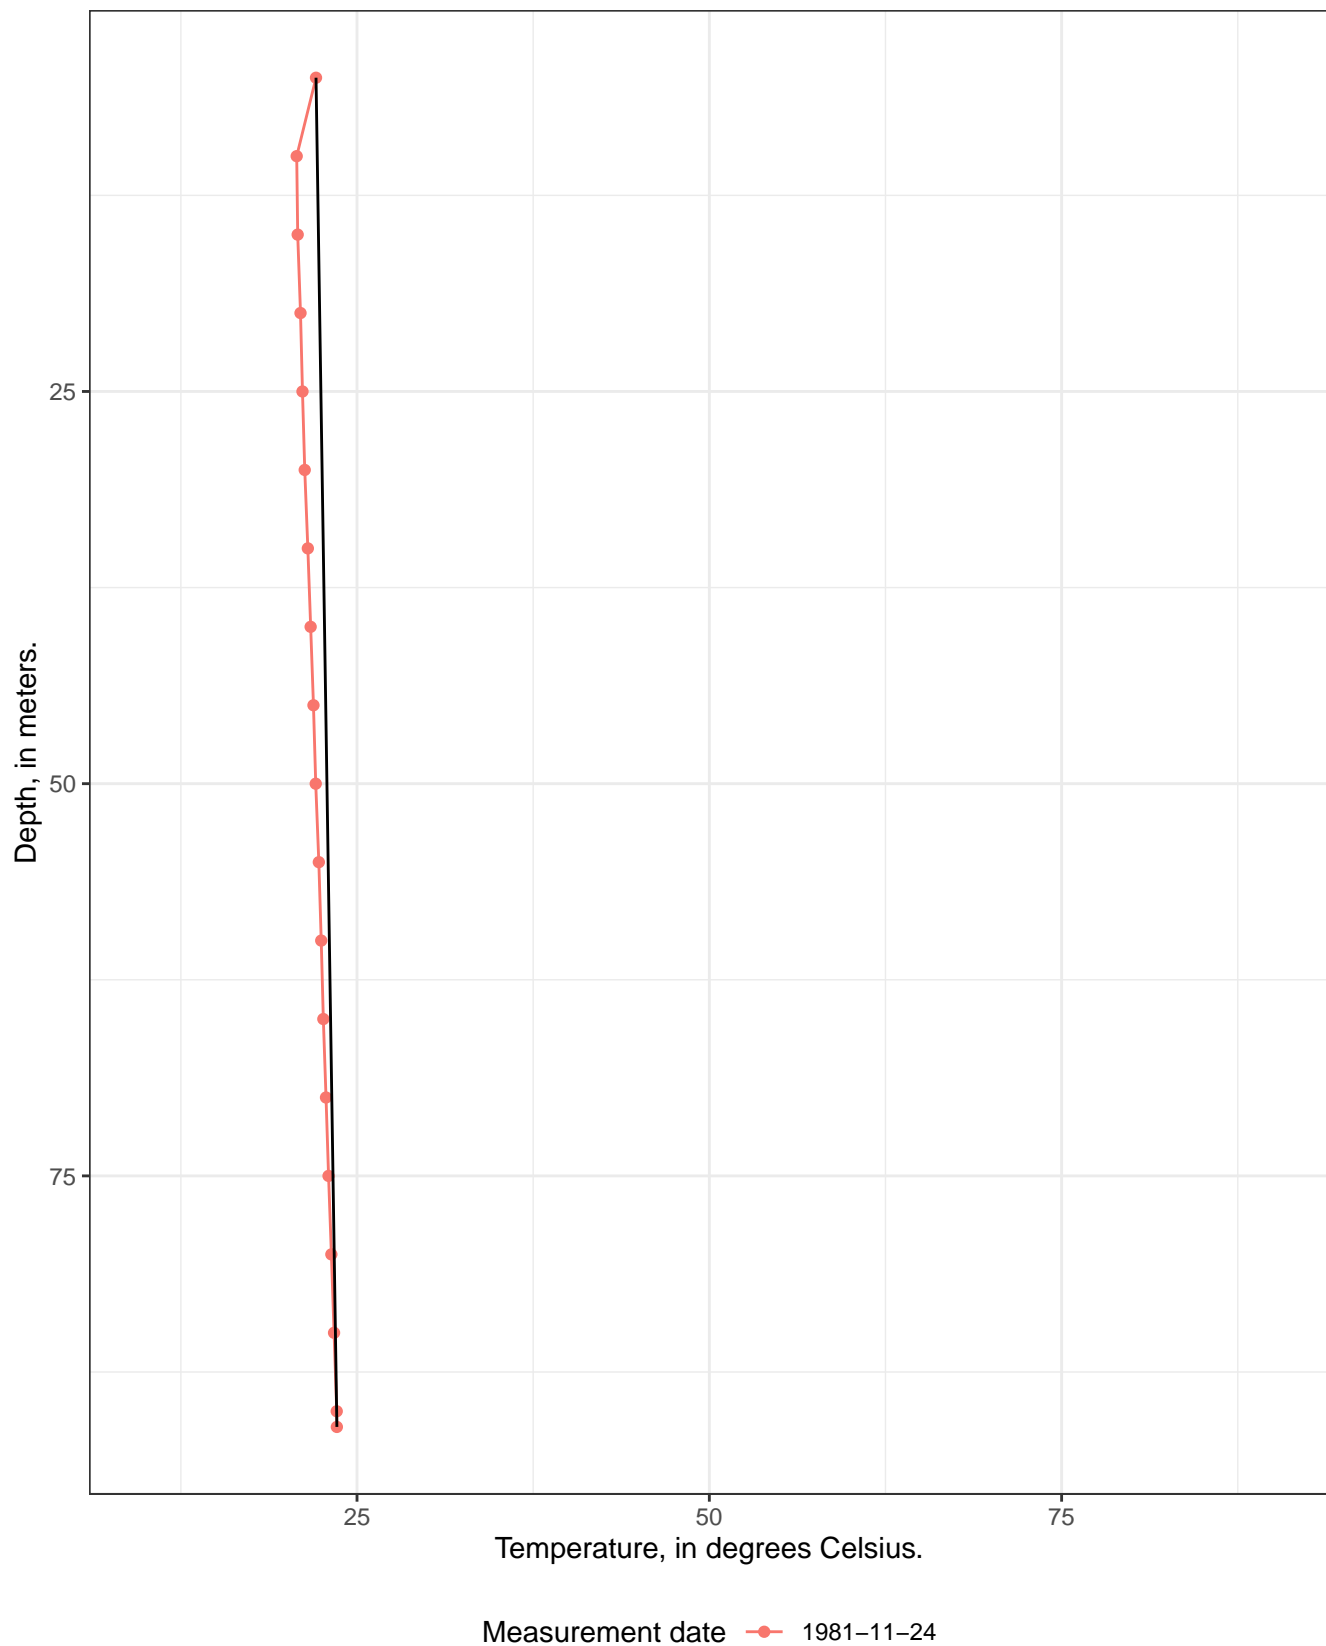

ID: 301 [TG-40\_NMSUEI]

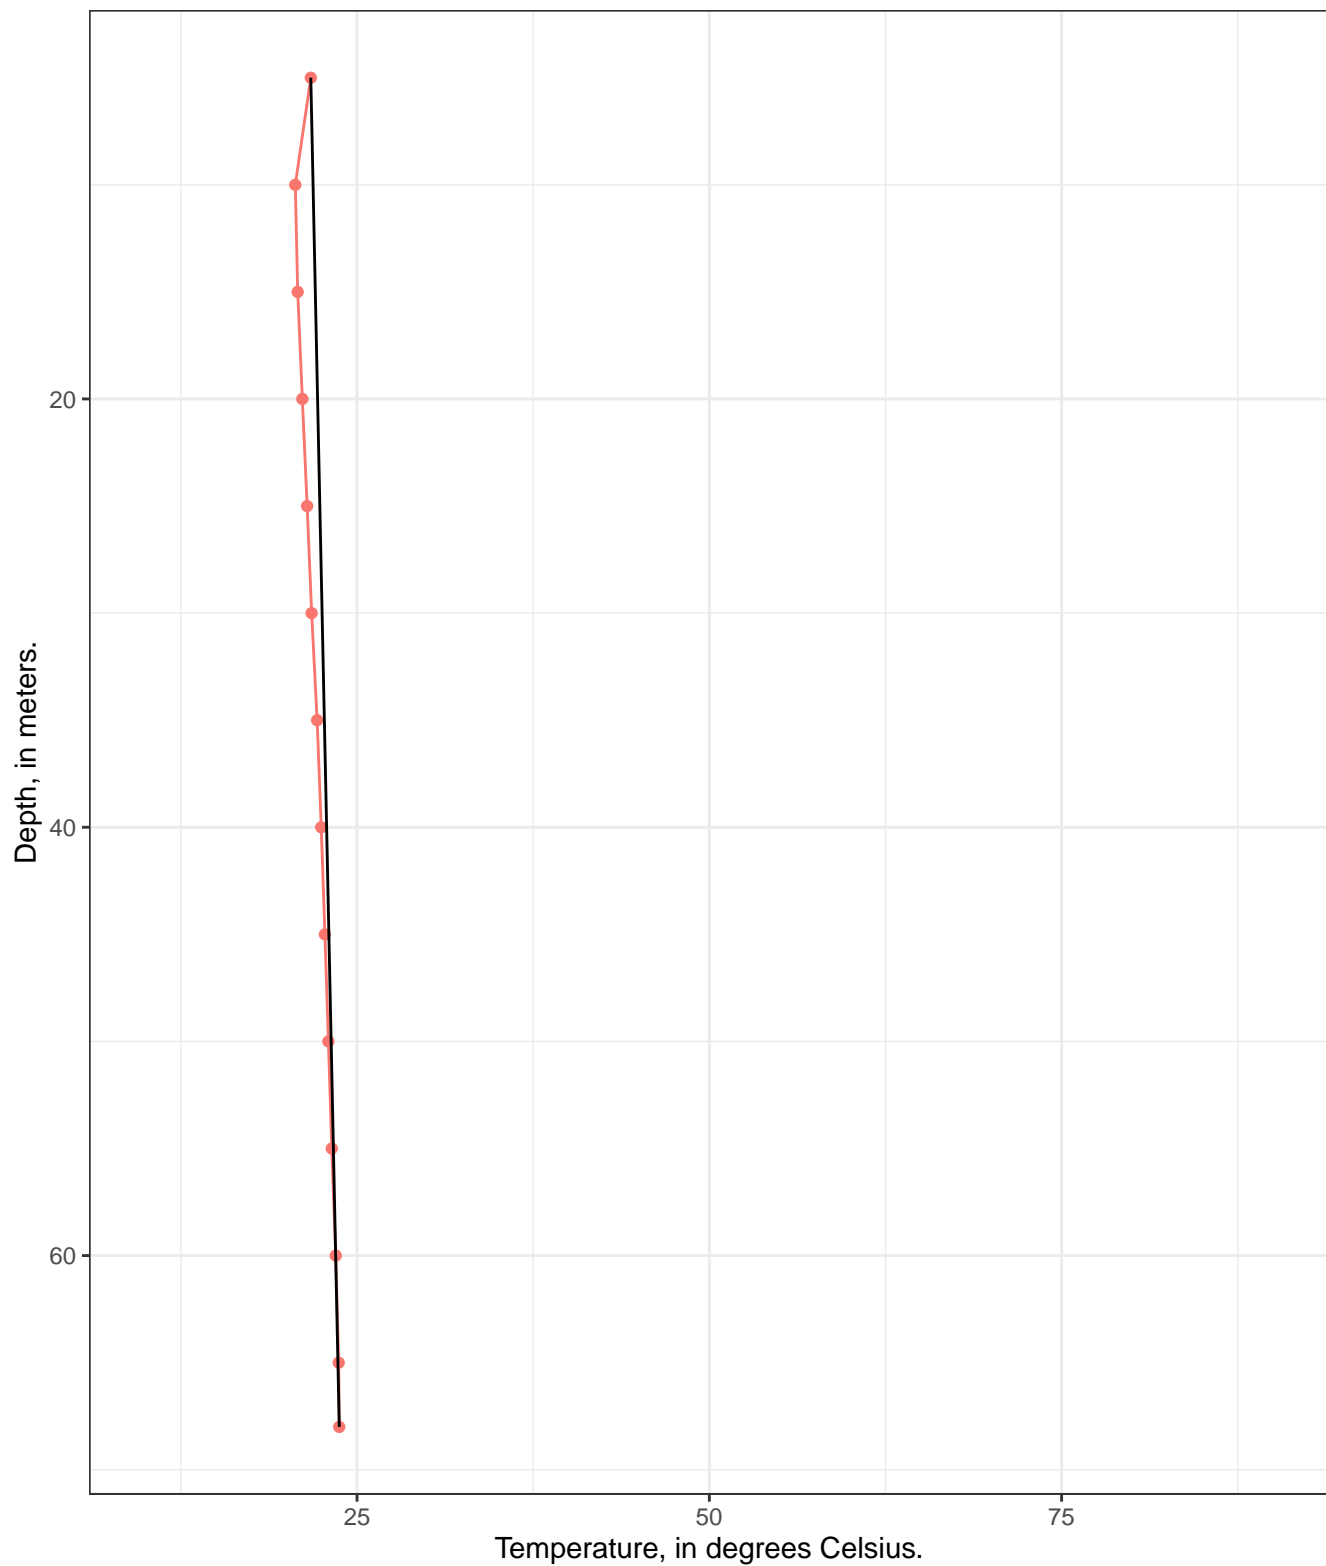

Measurement date 1981-11-24

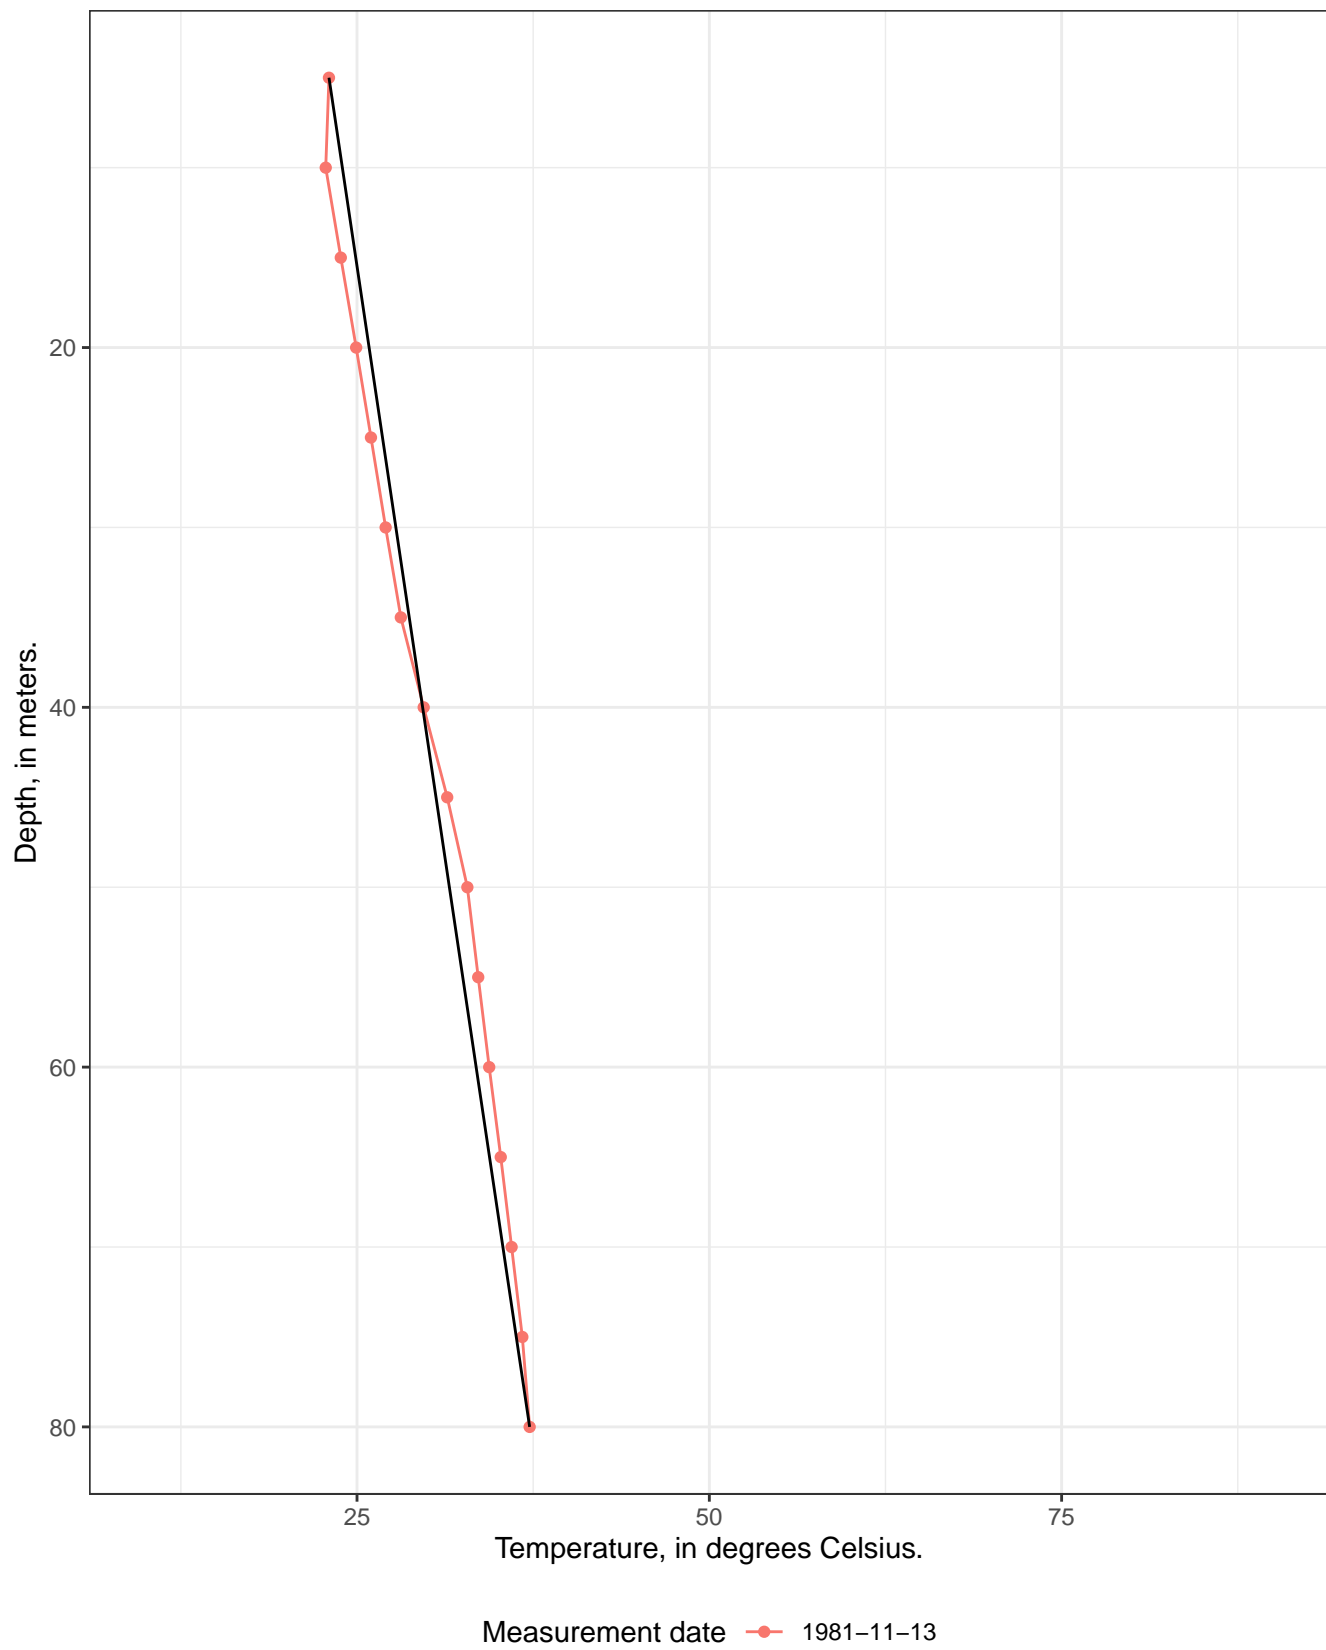

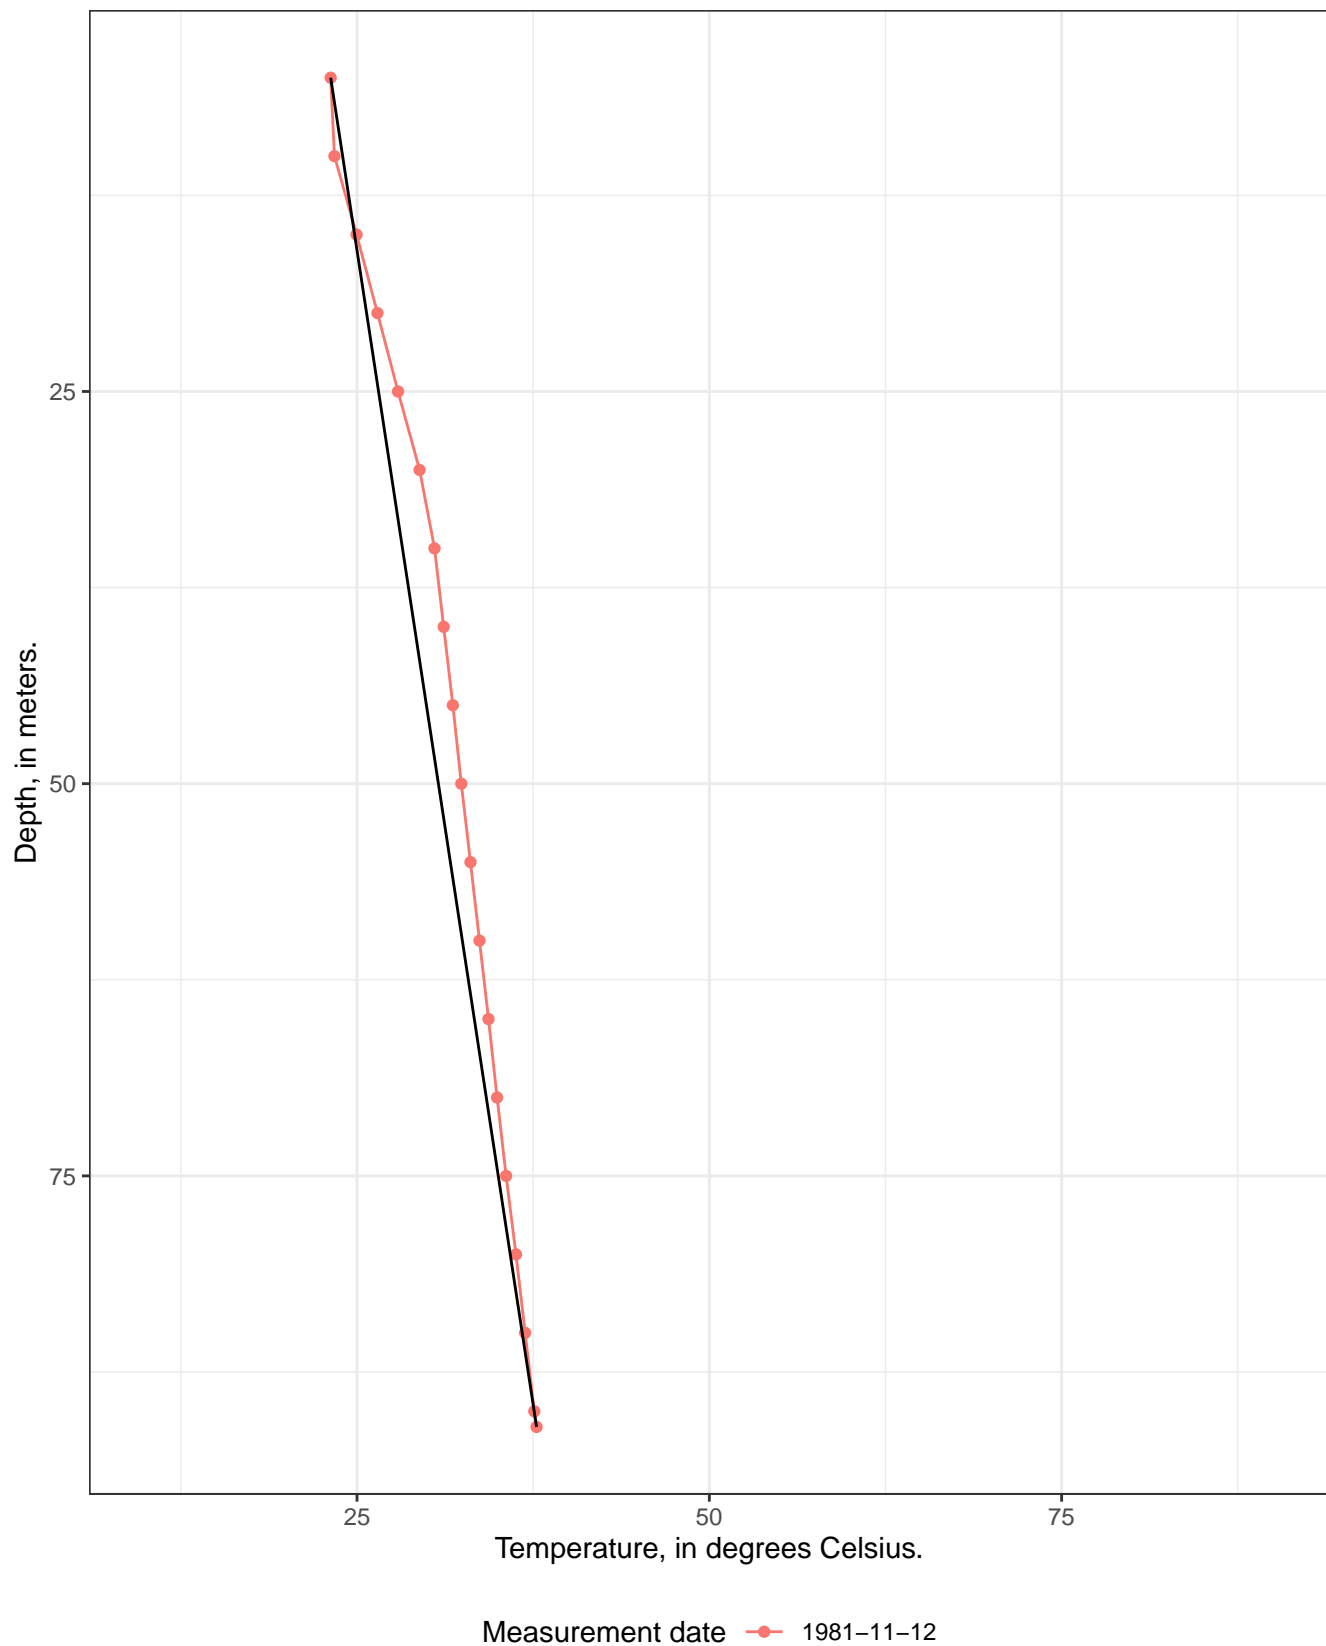



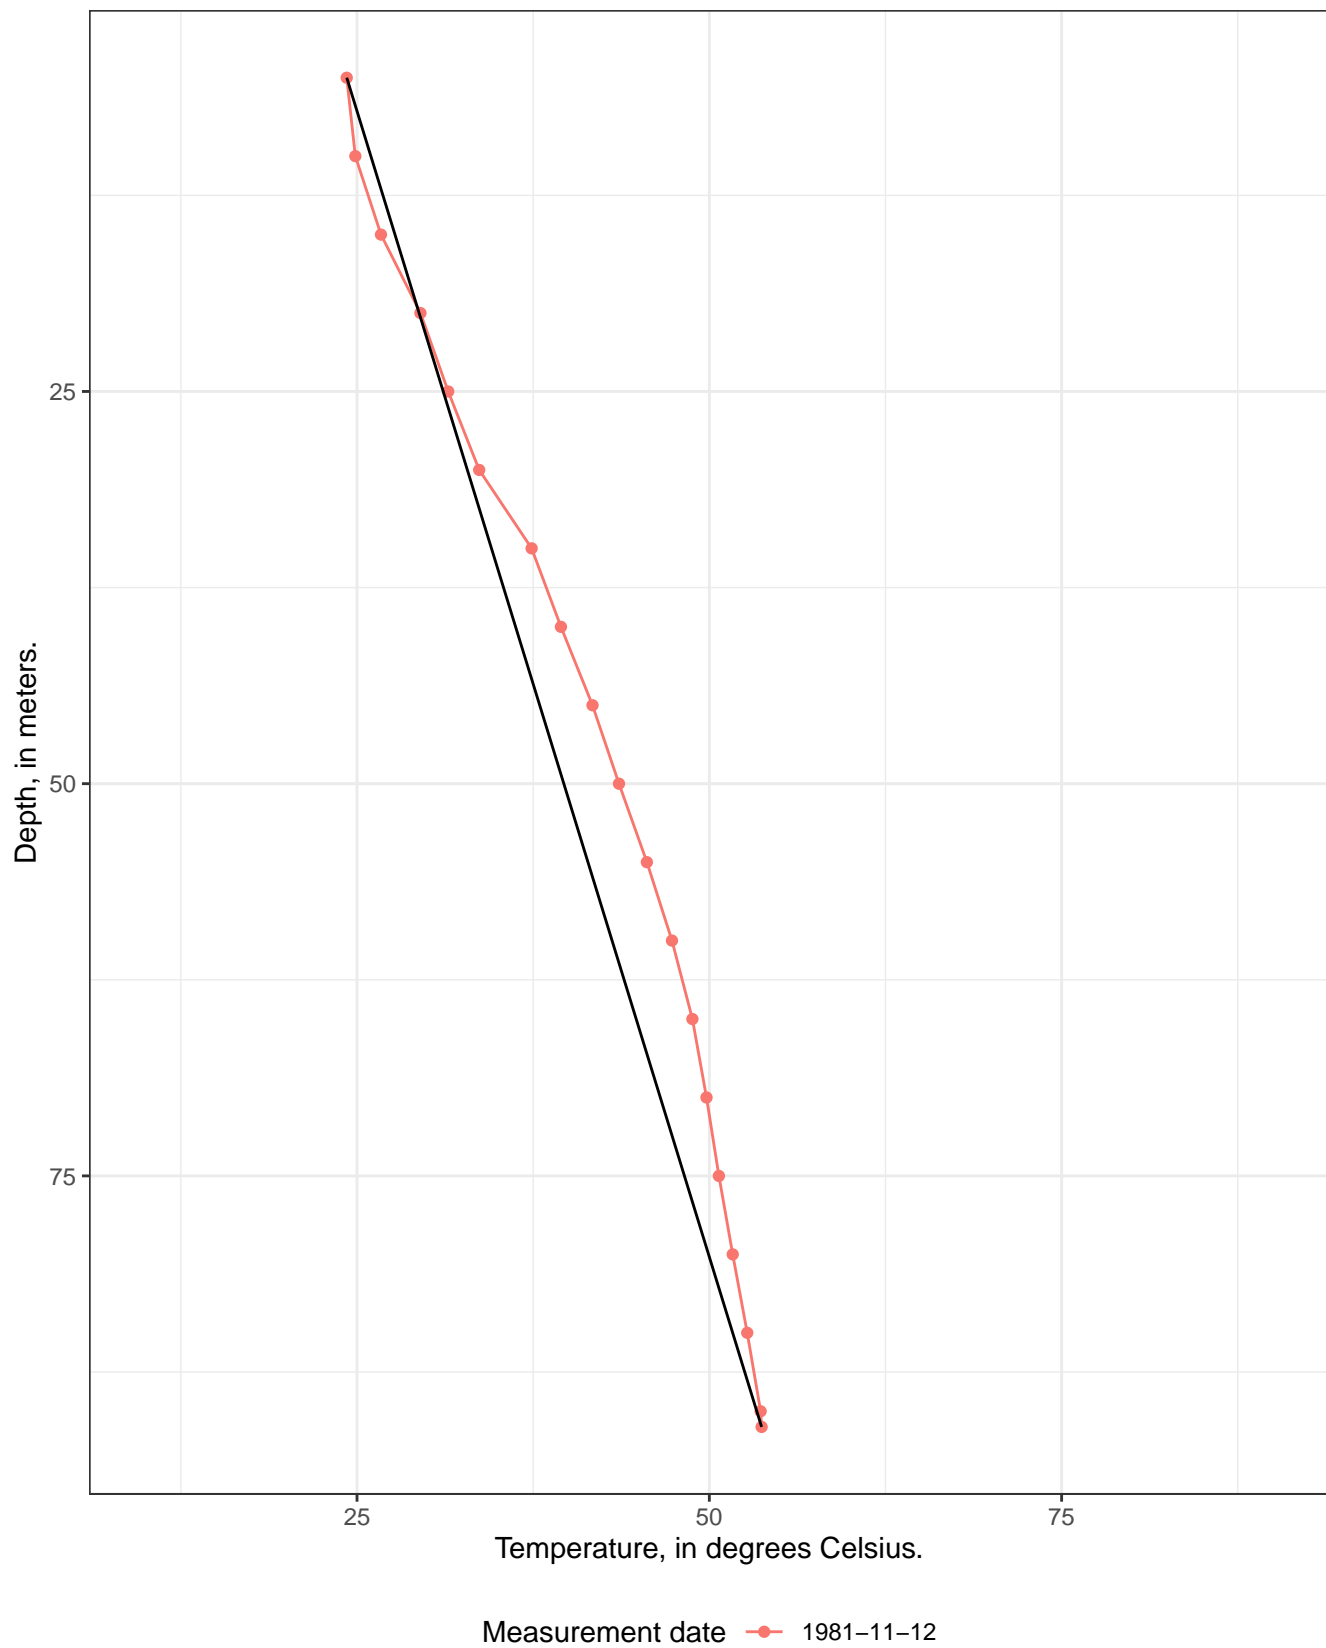

ID: 305 [TG-44\_NMSUEI]

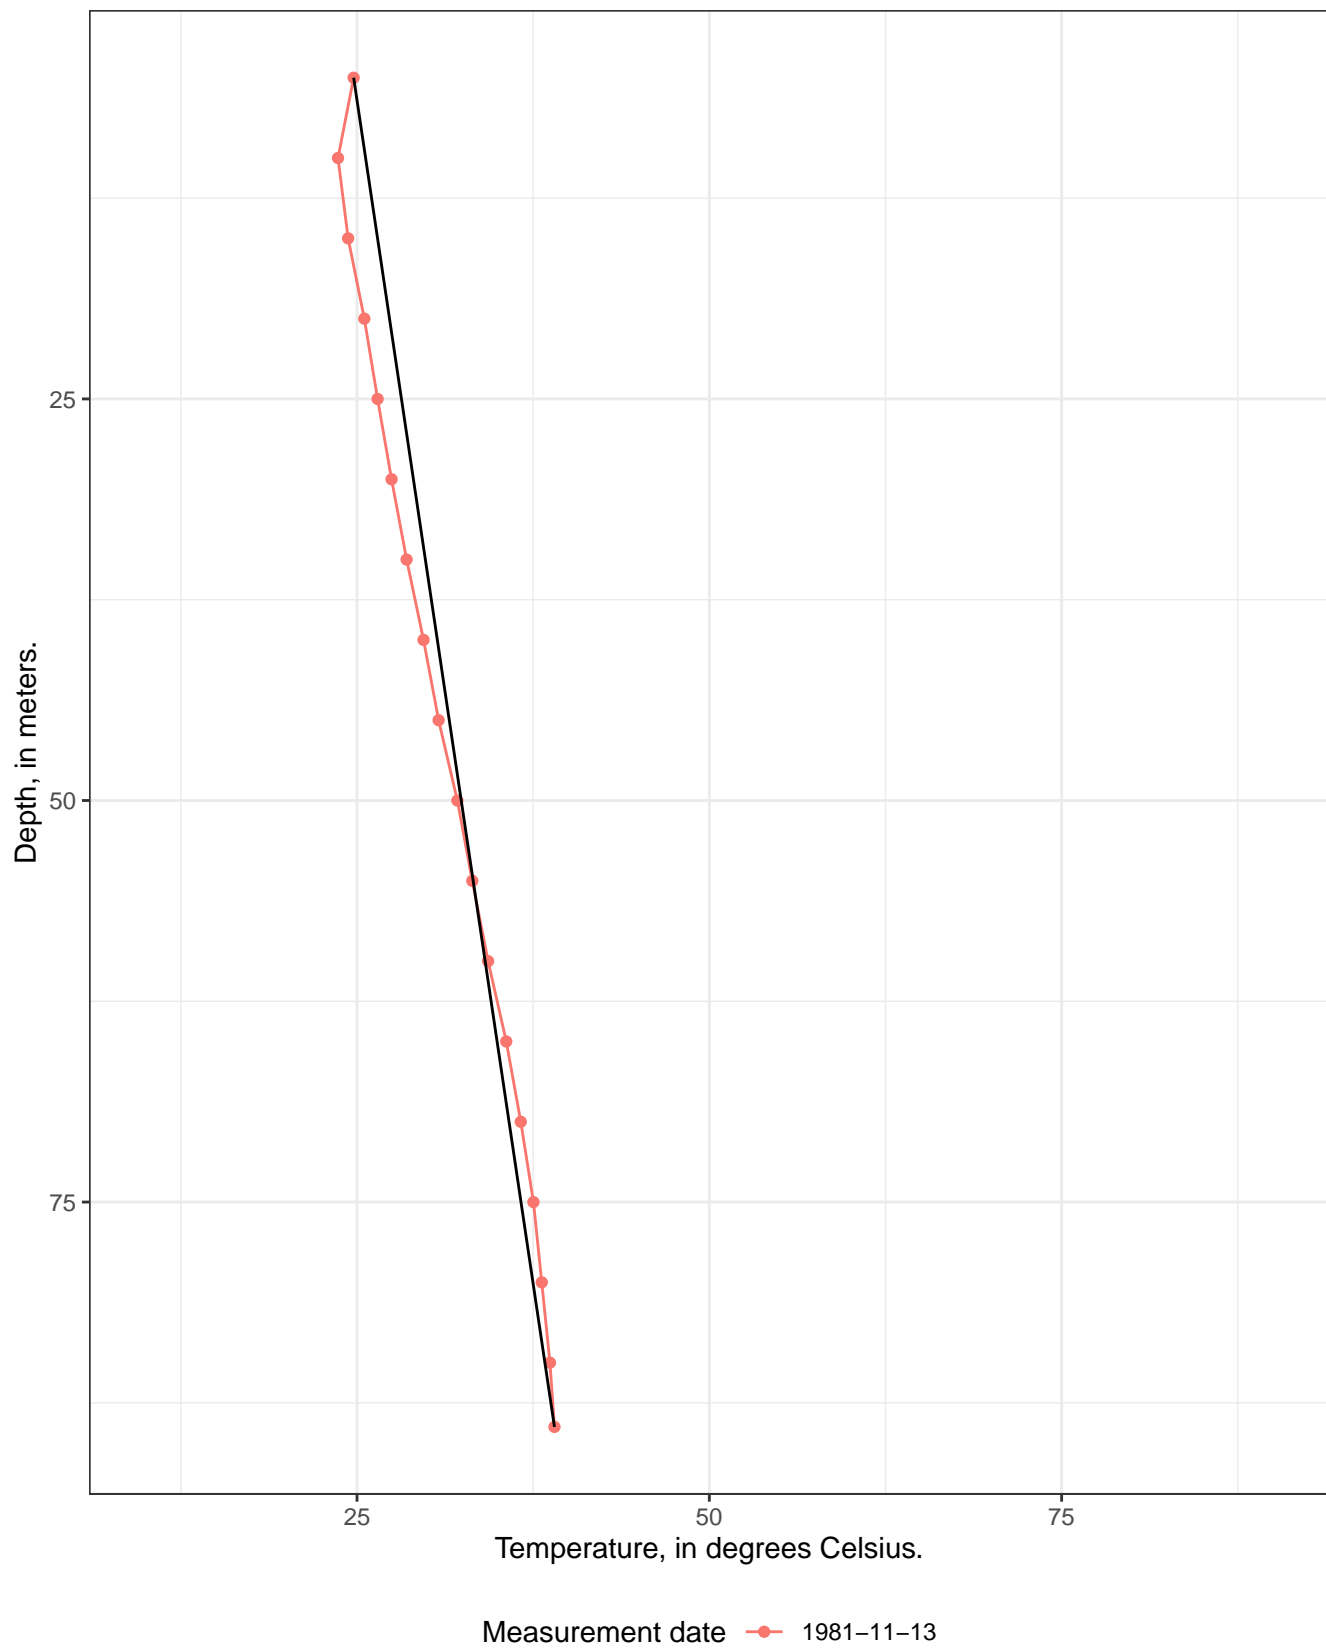

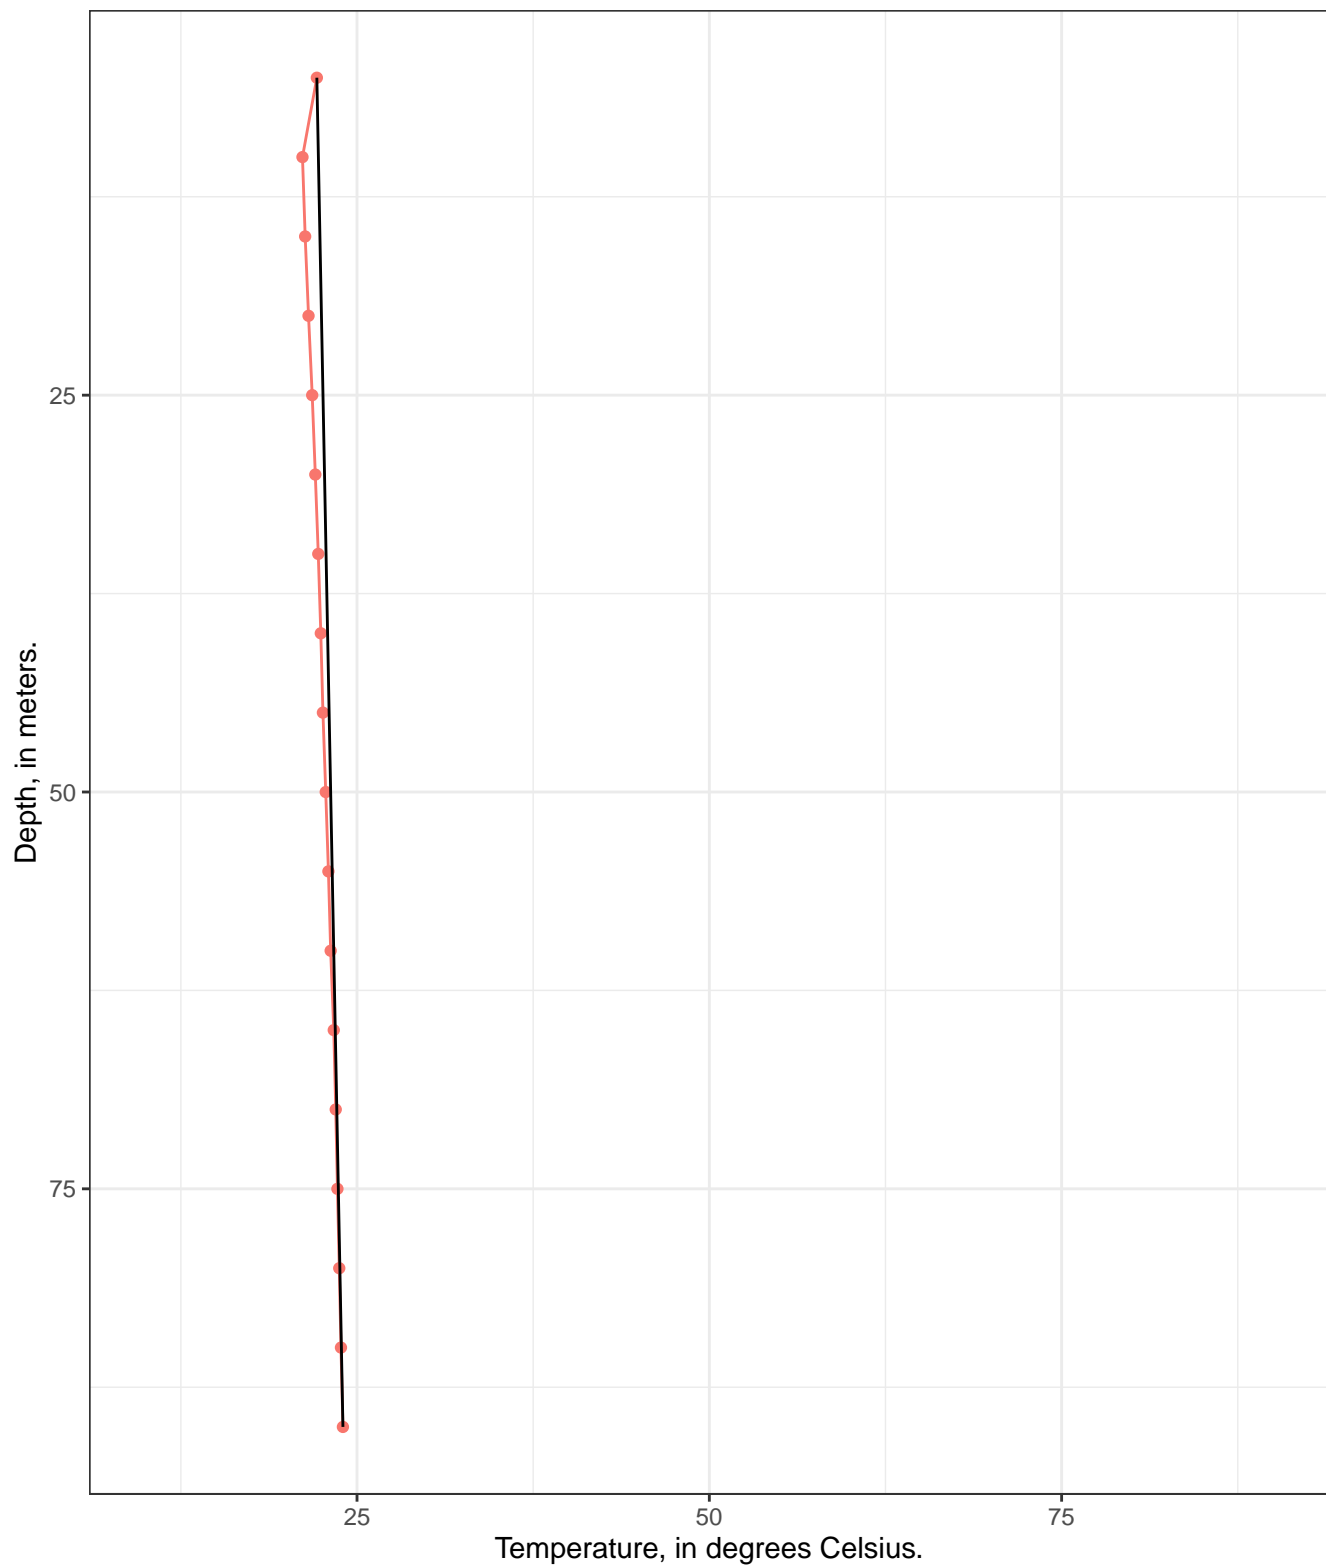

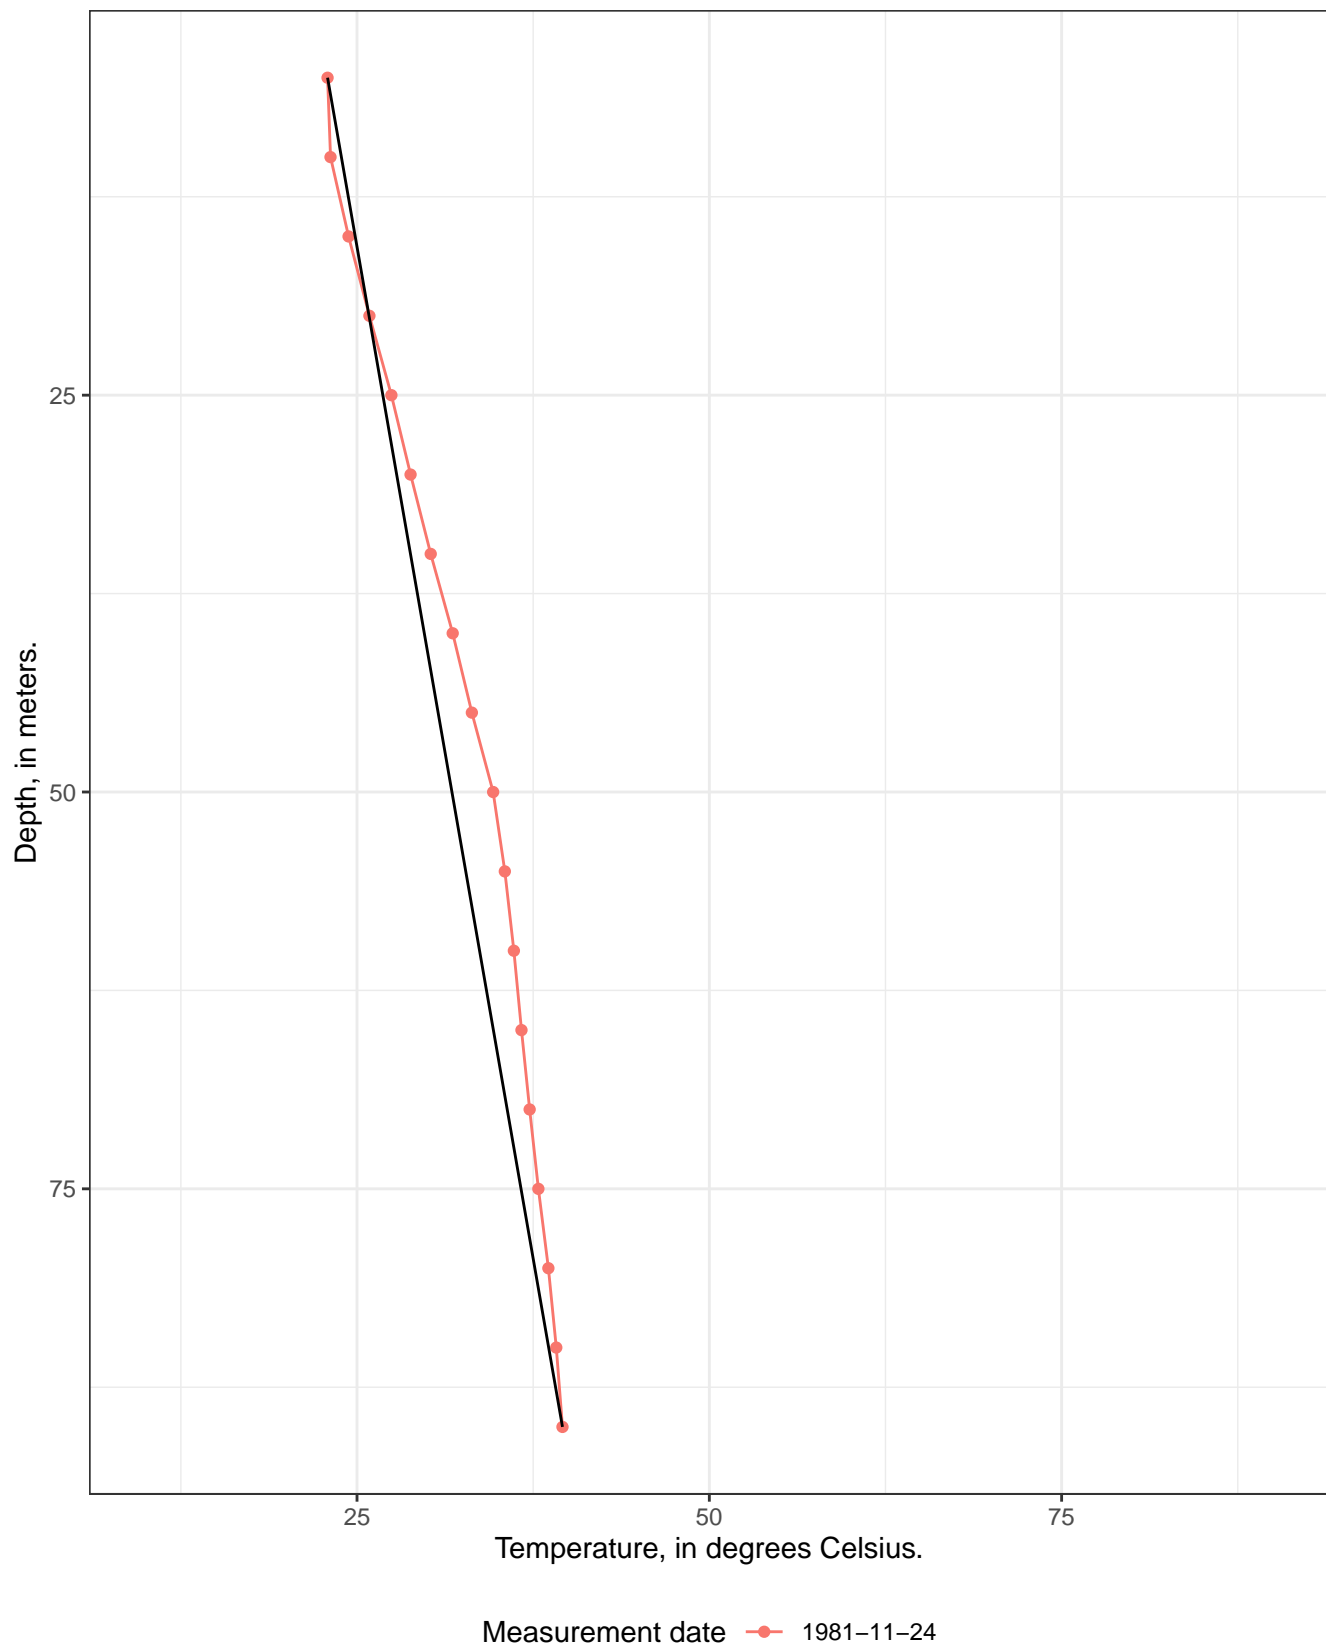

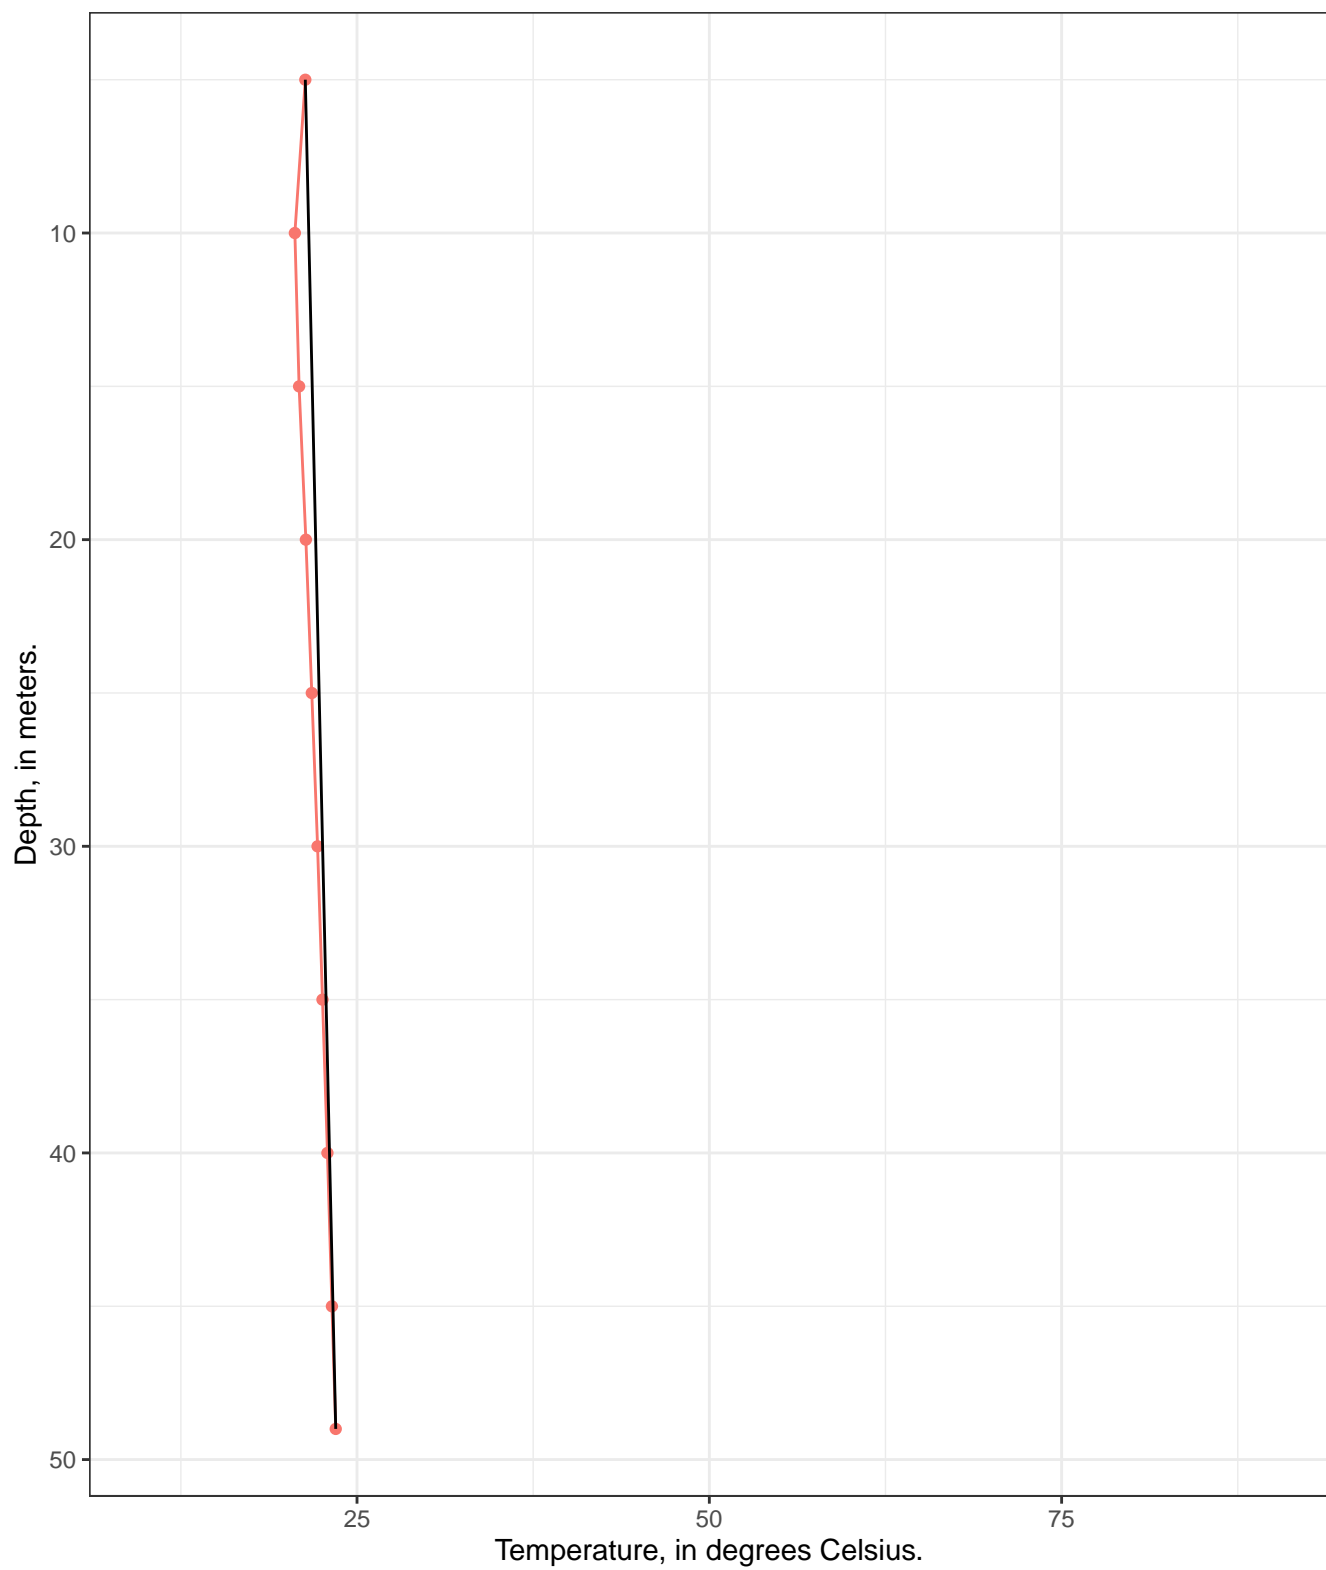

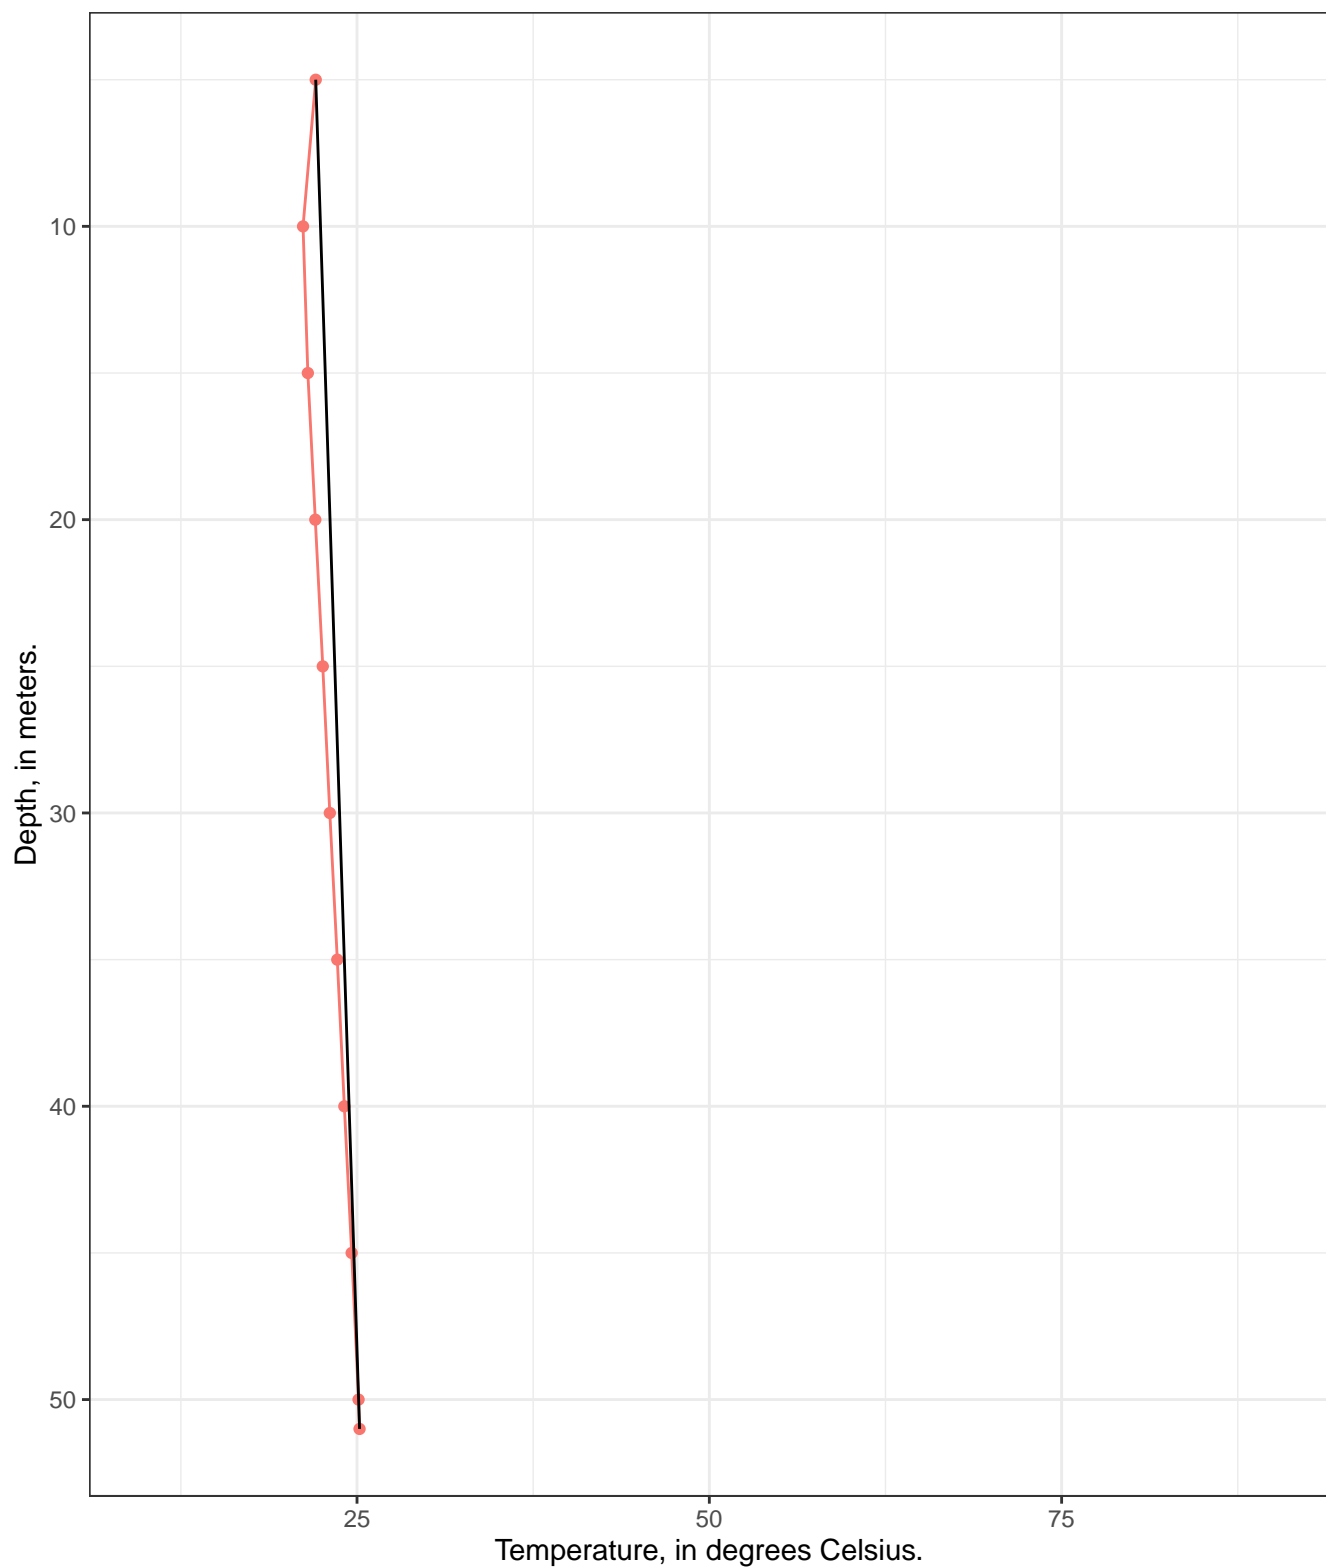

ID: 310 [TG-51\_NMSUEI]

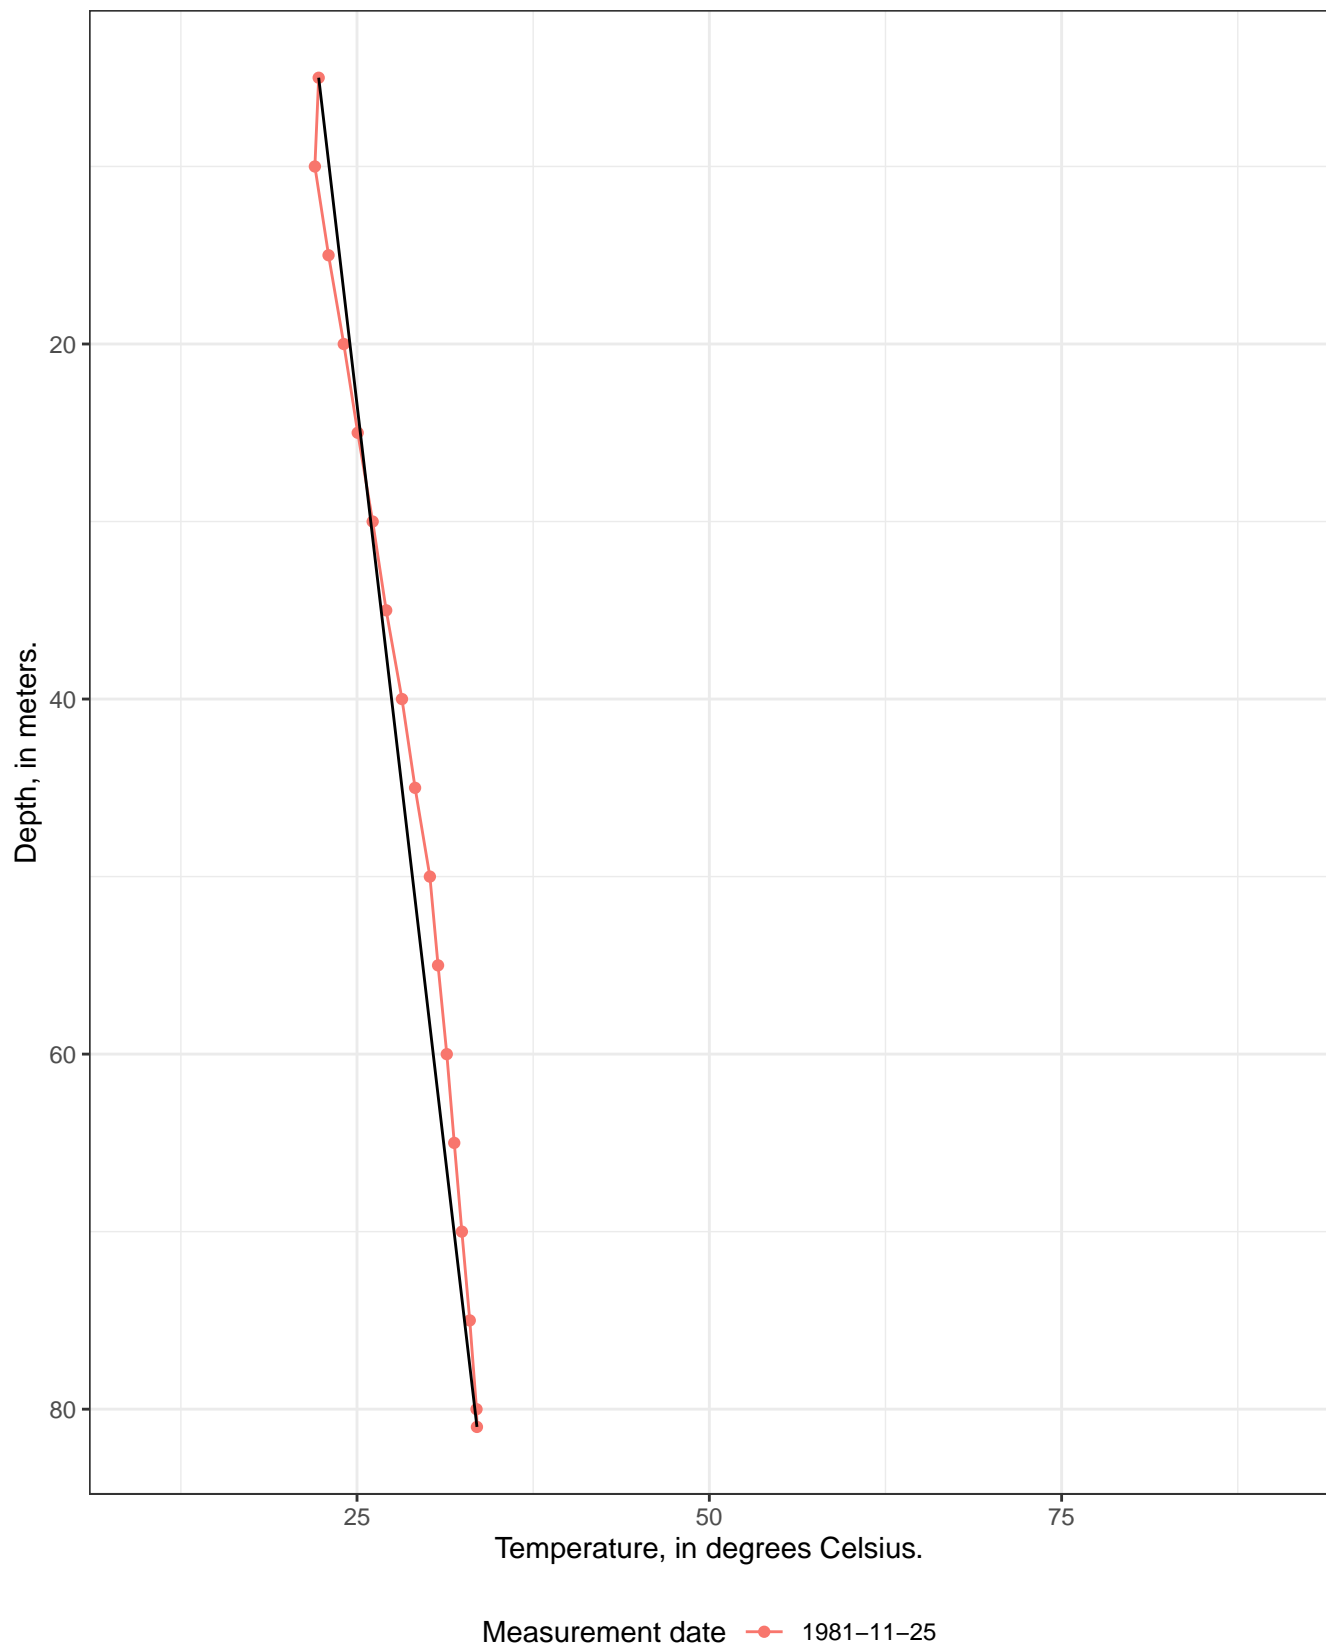

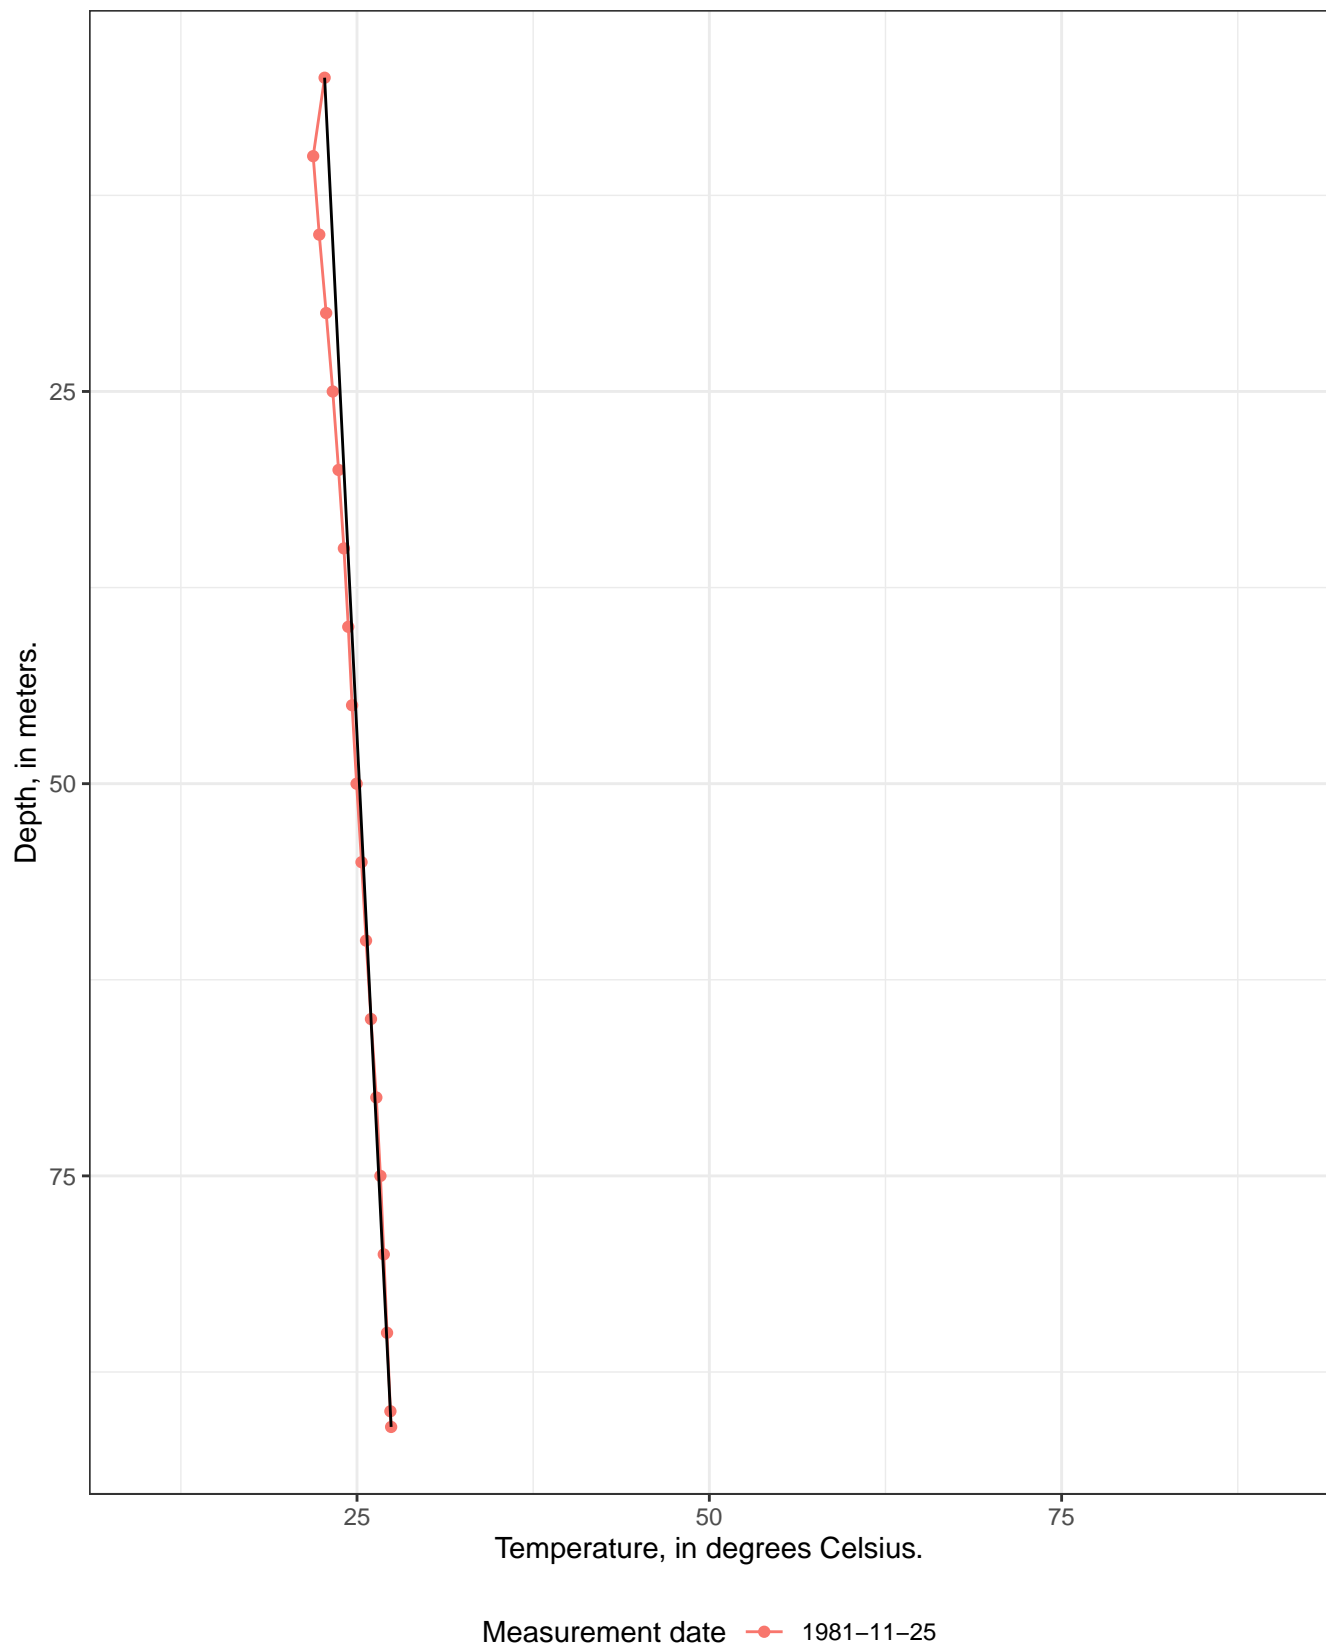



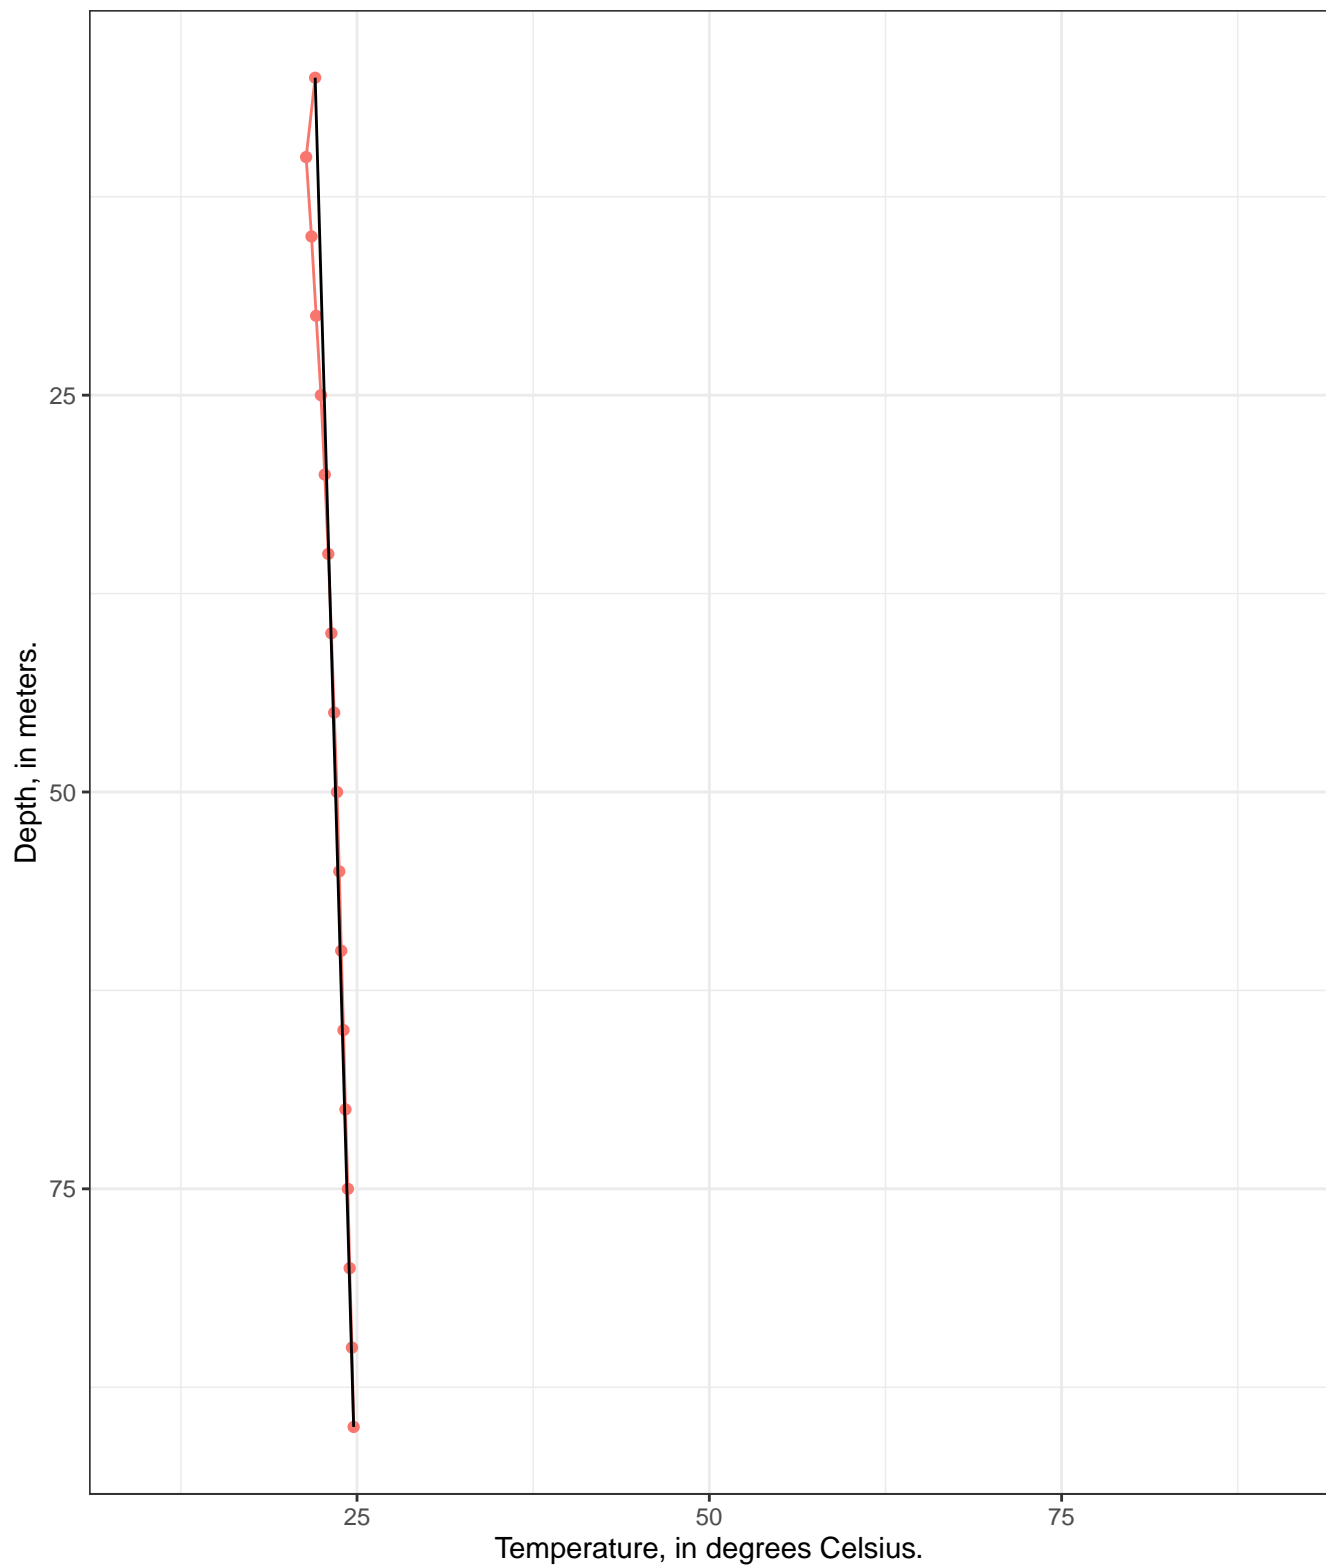

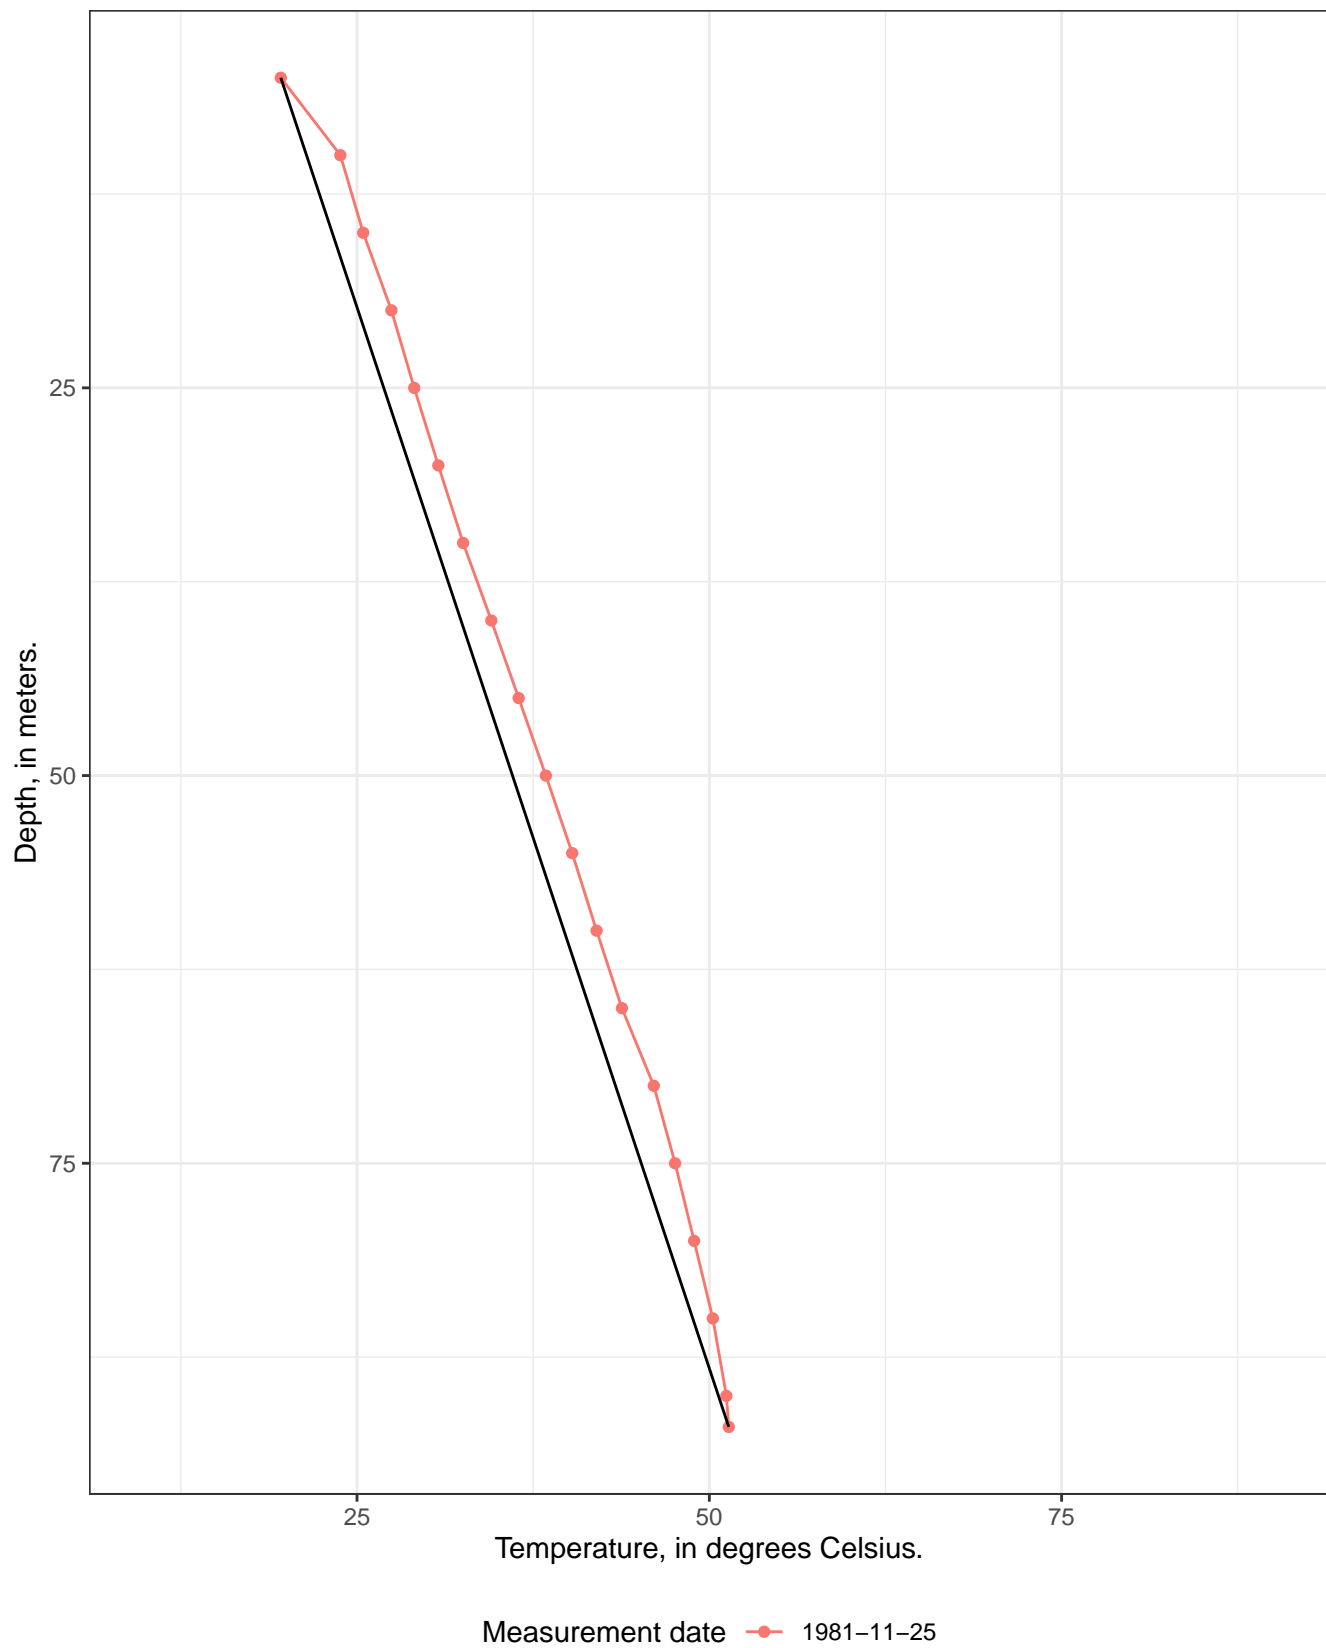

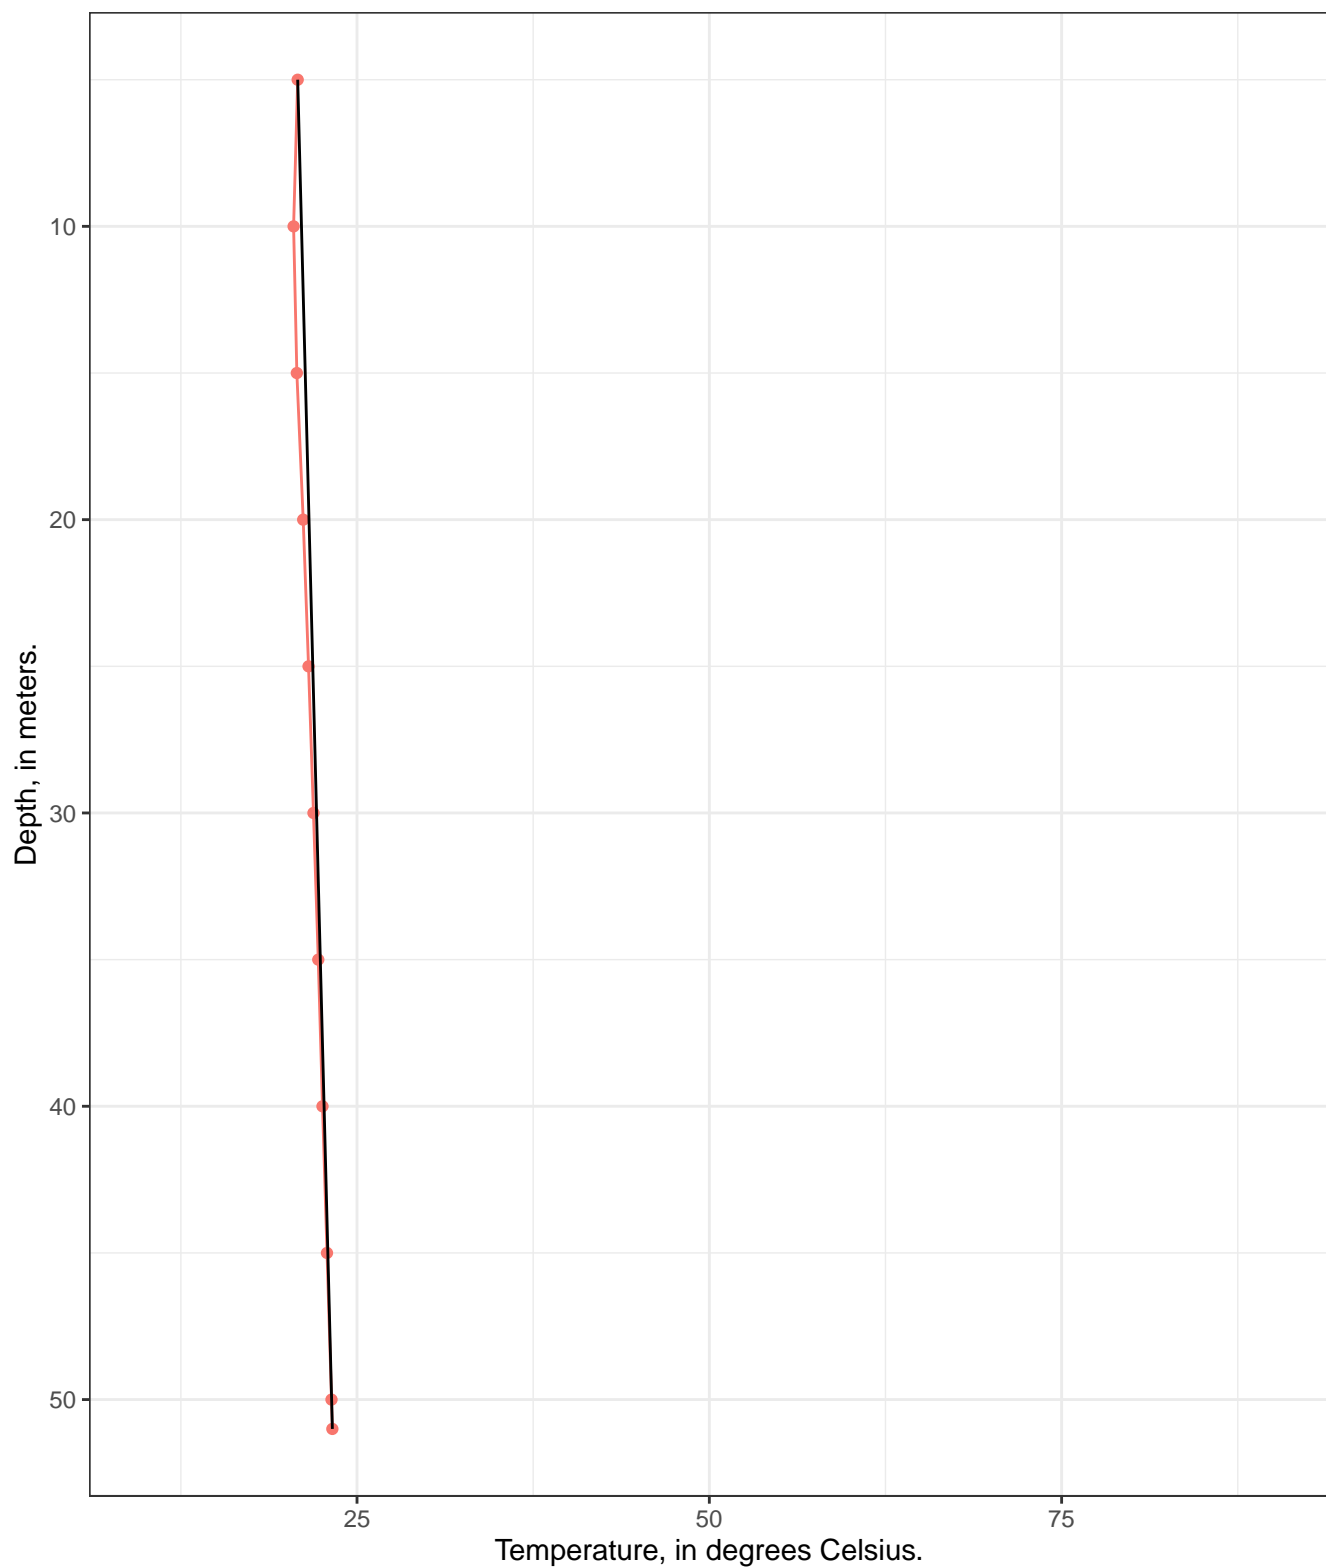

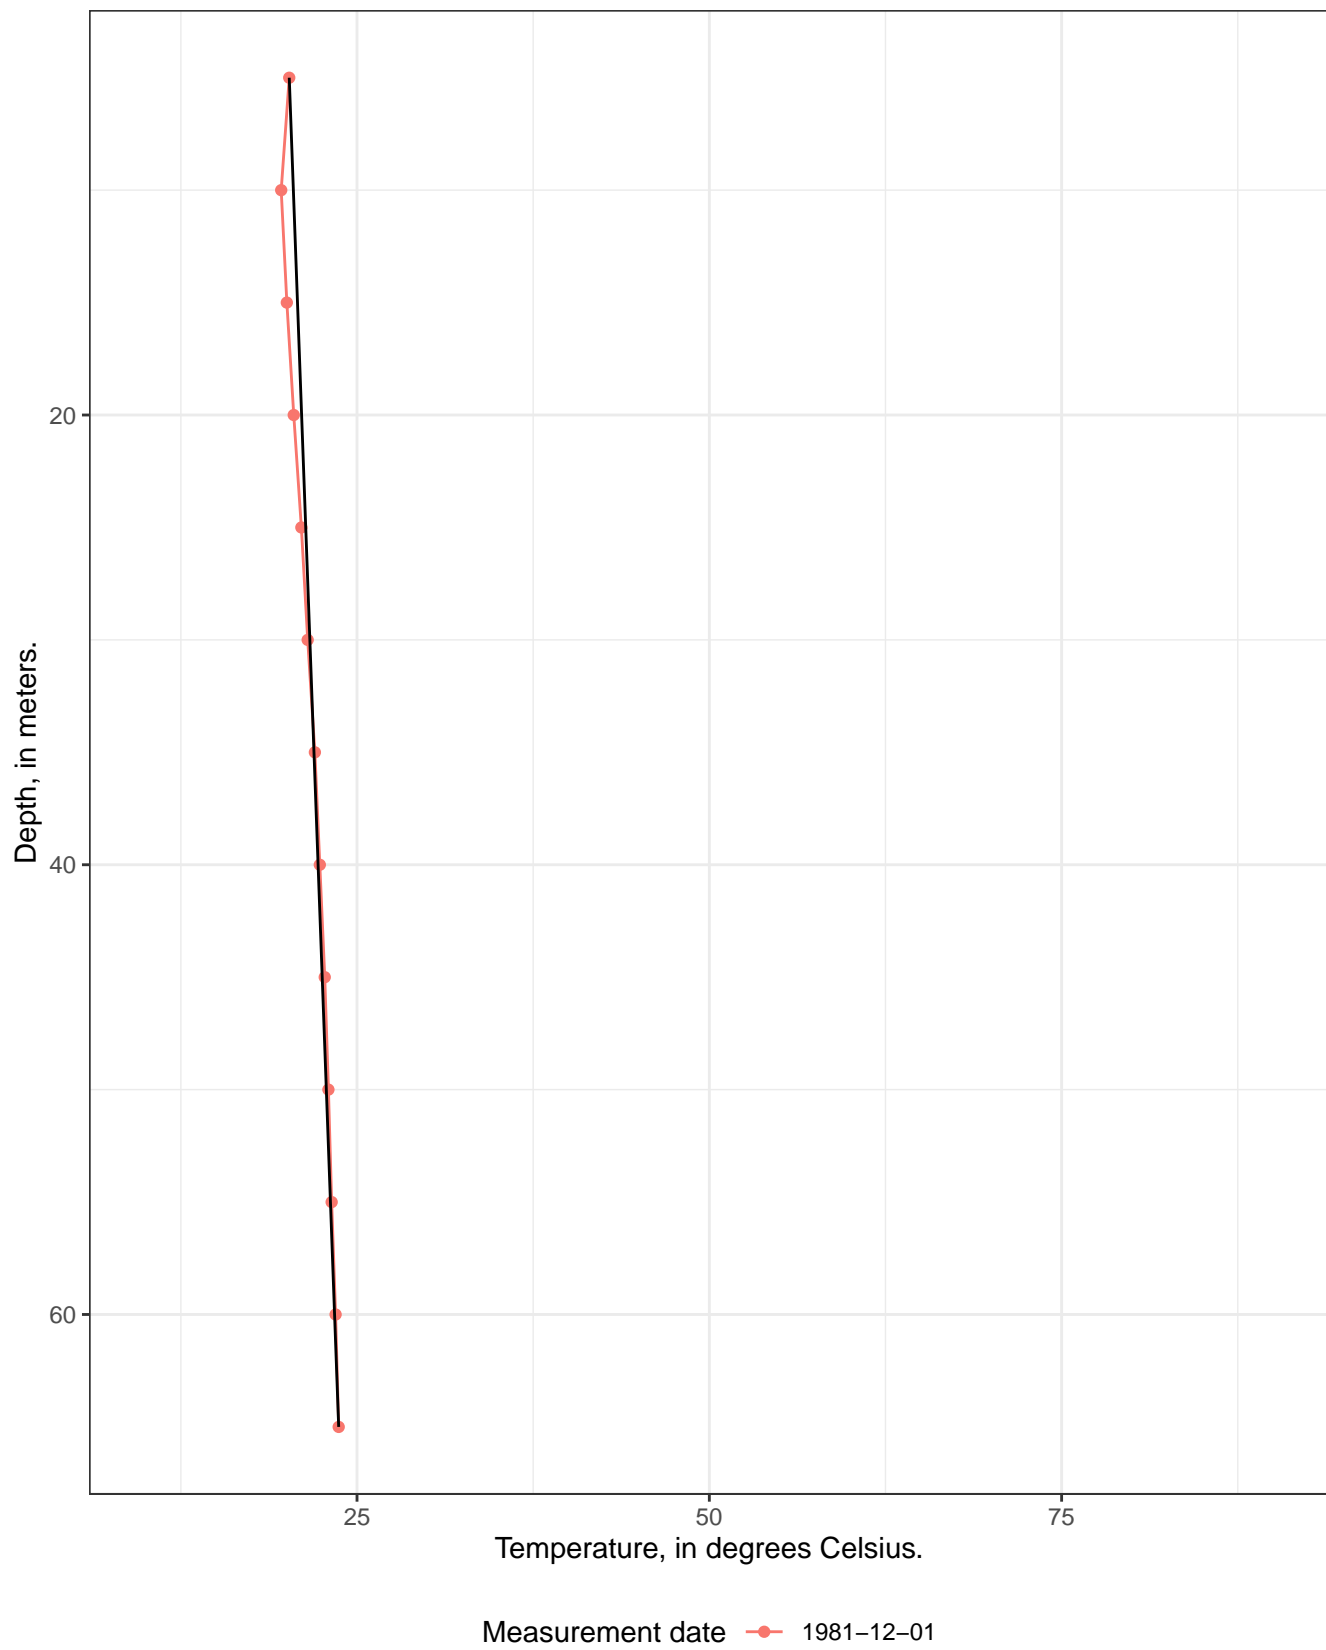

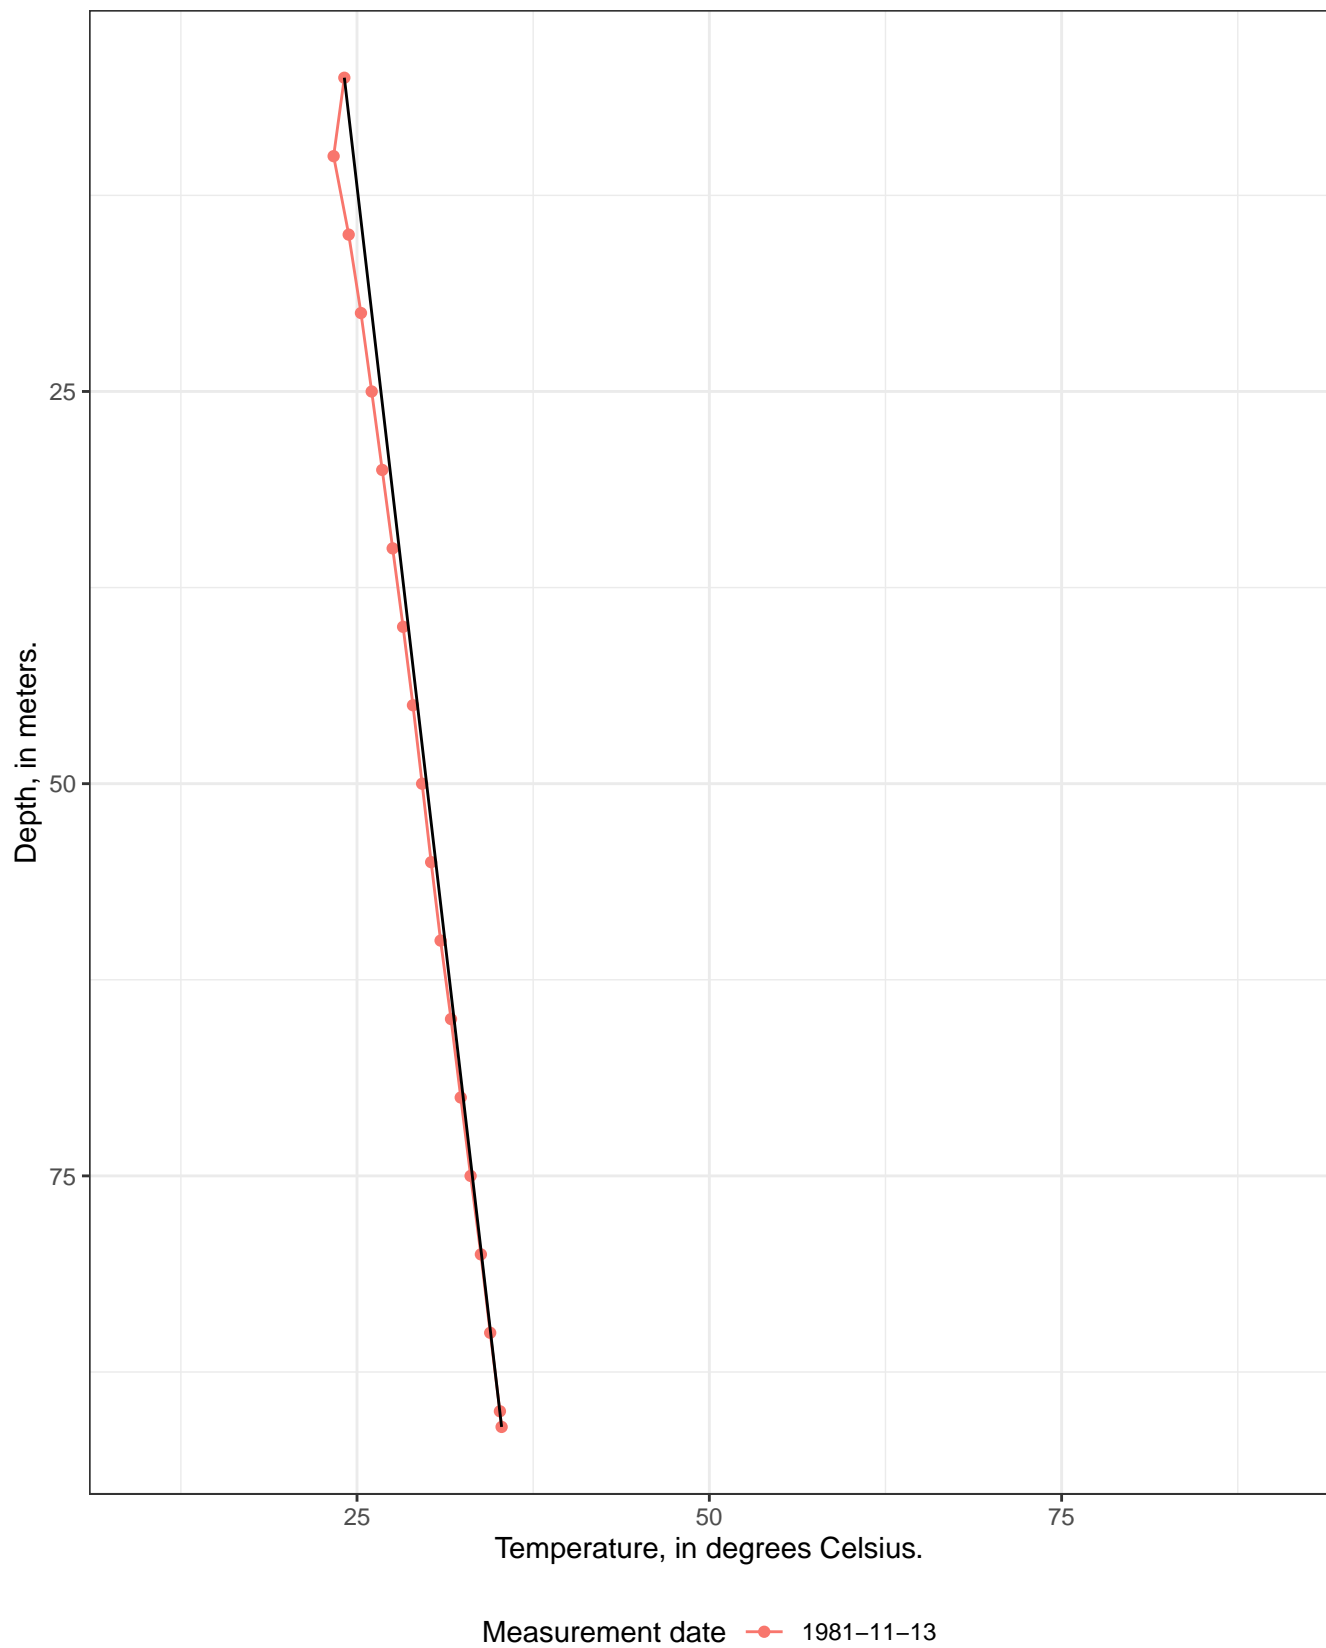

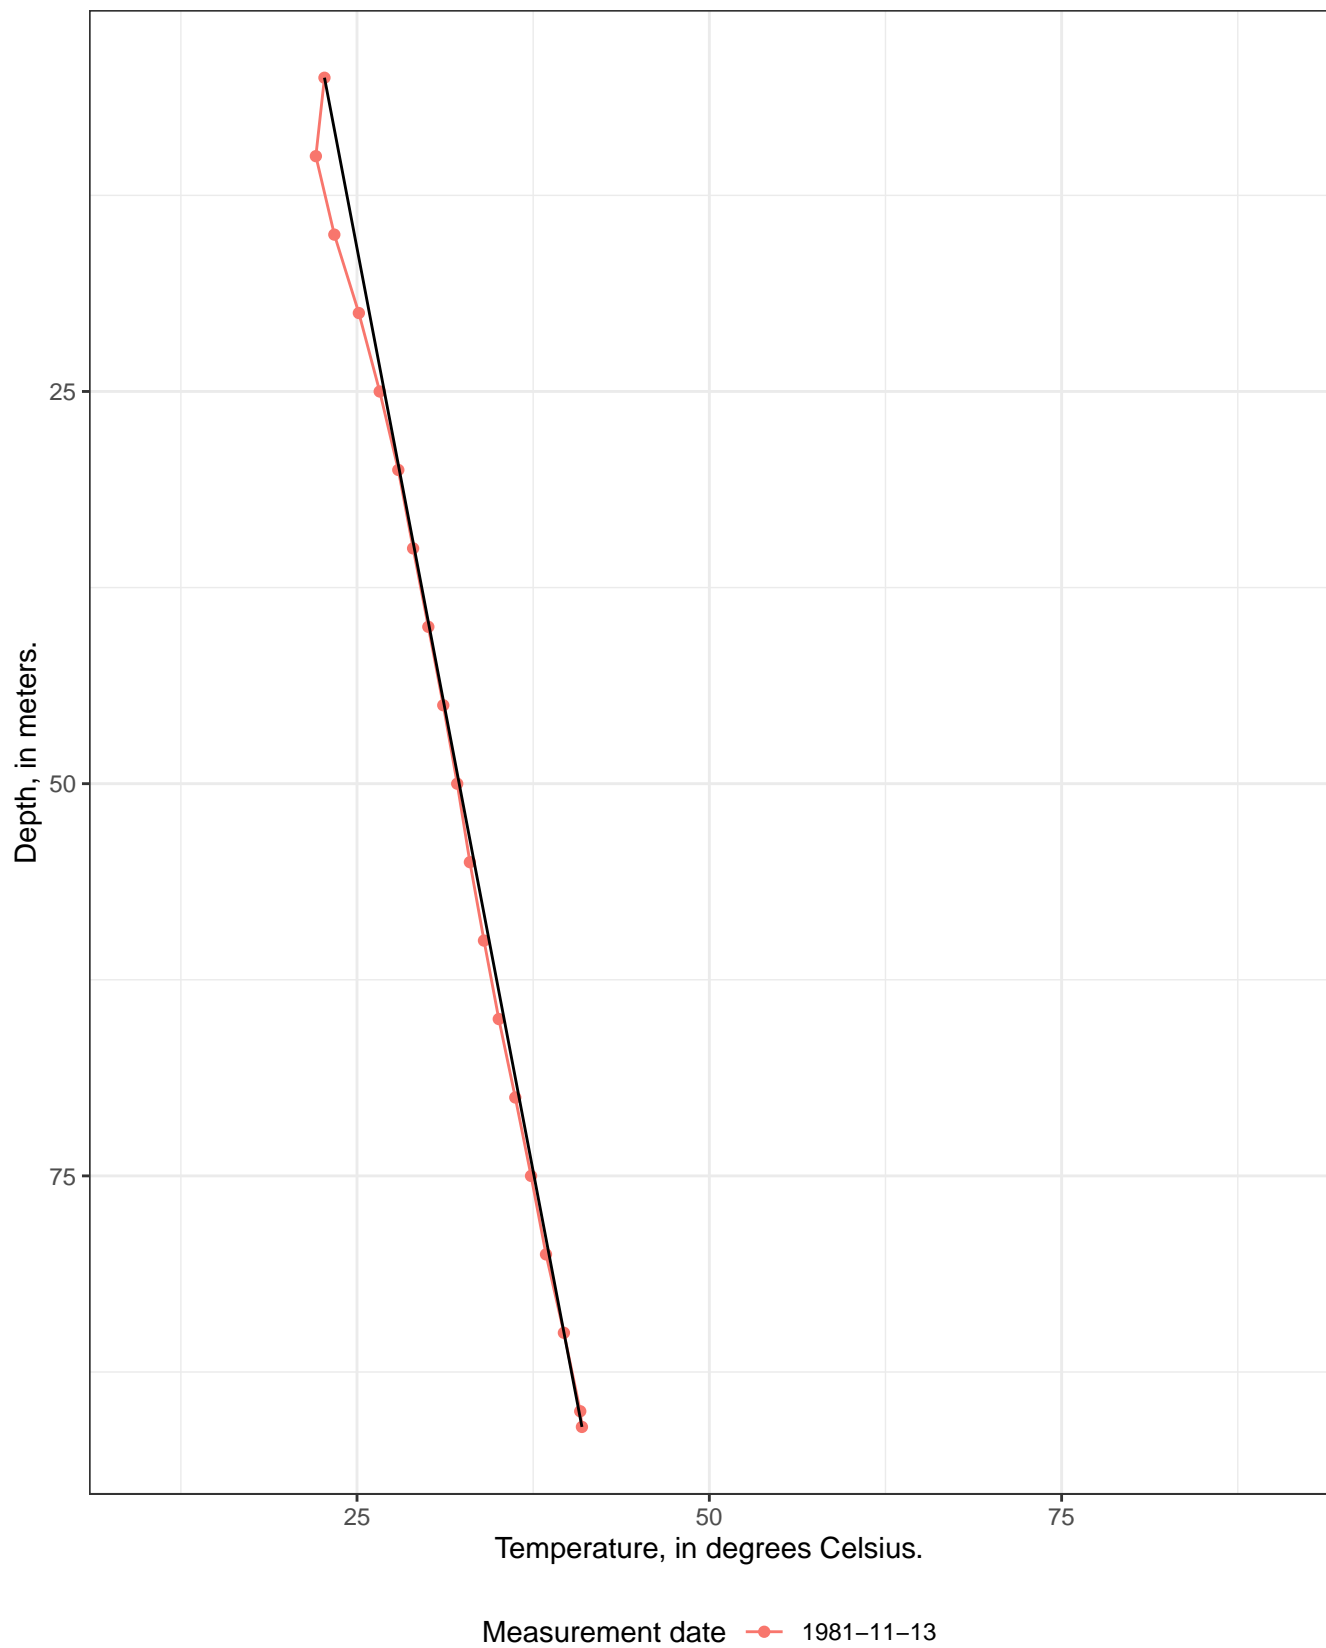

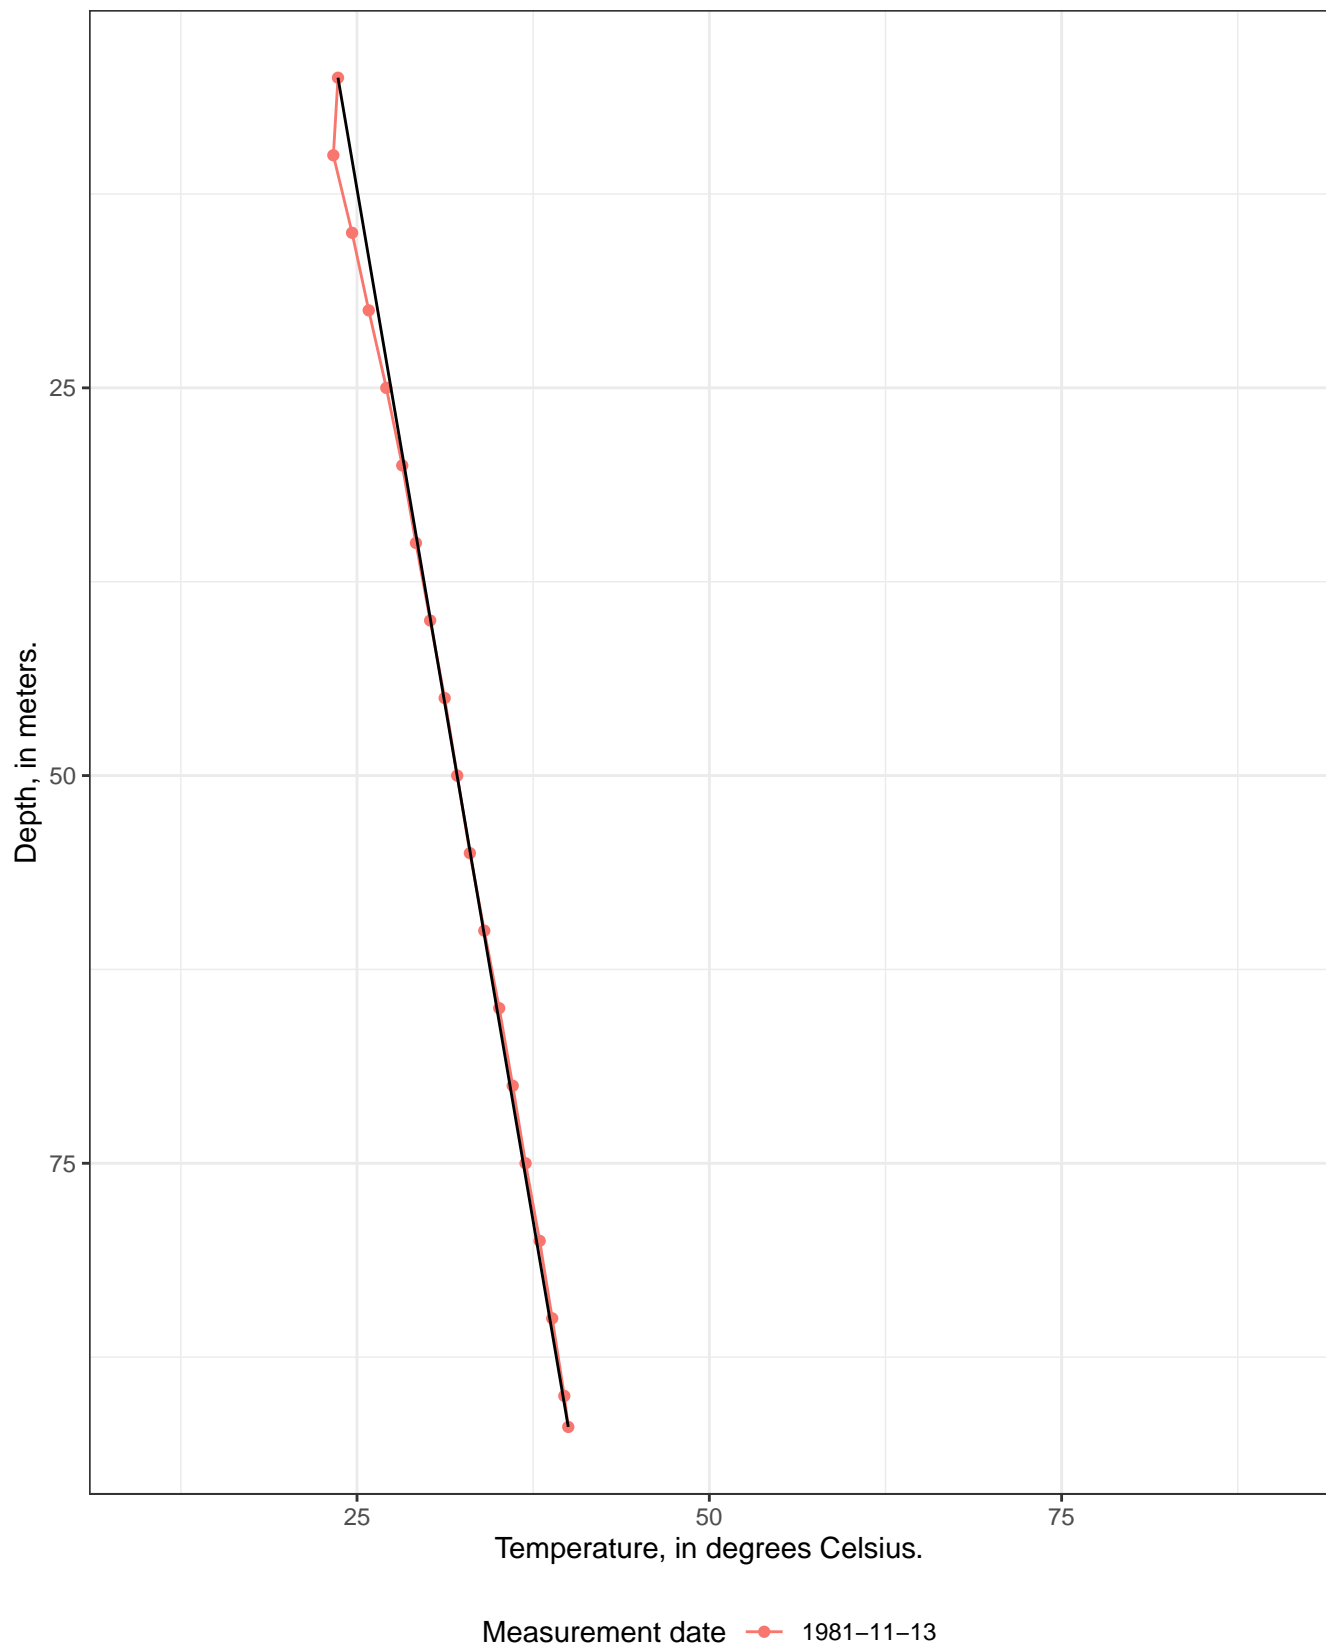

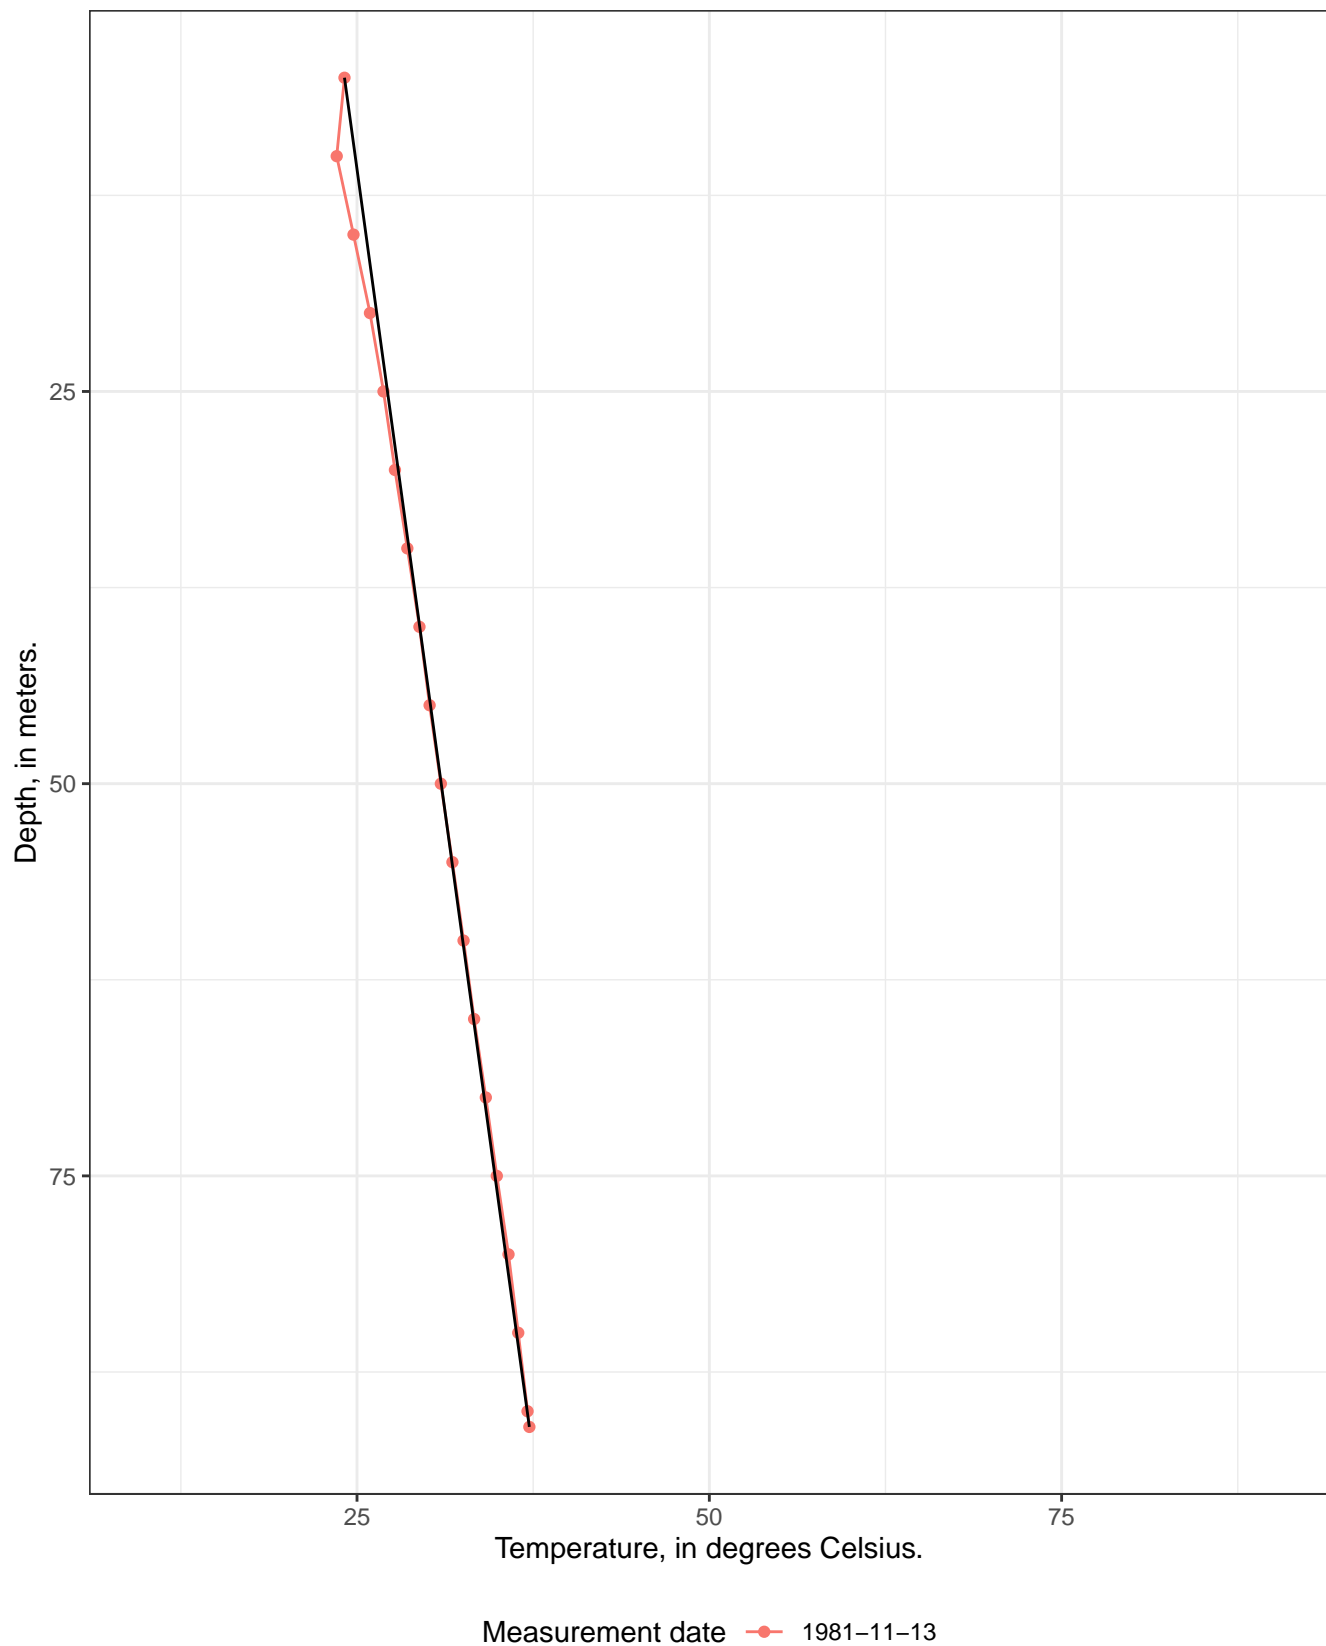



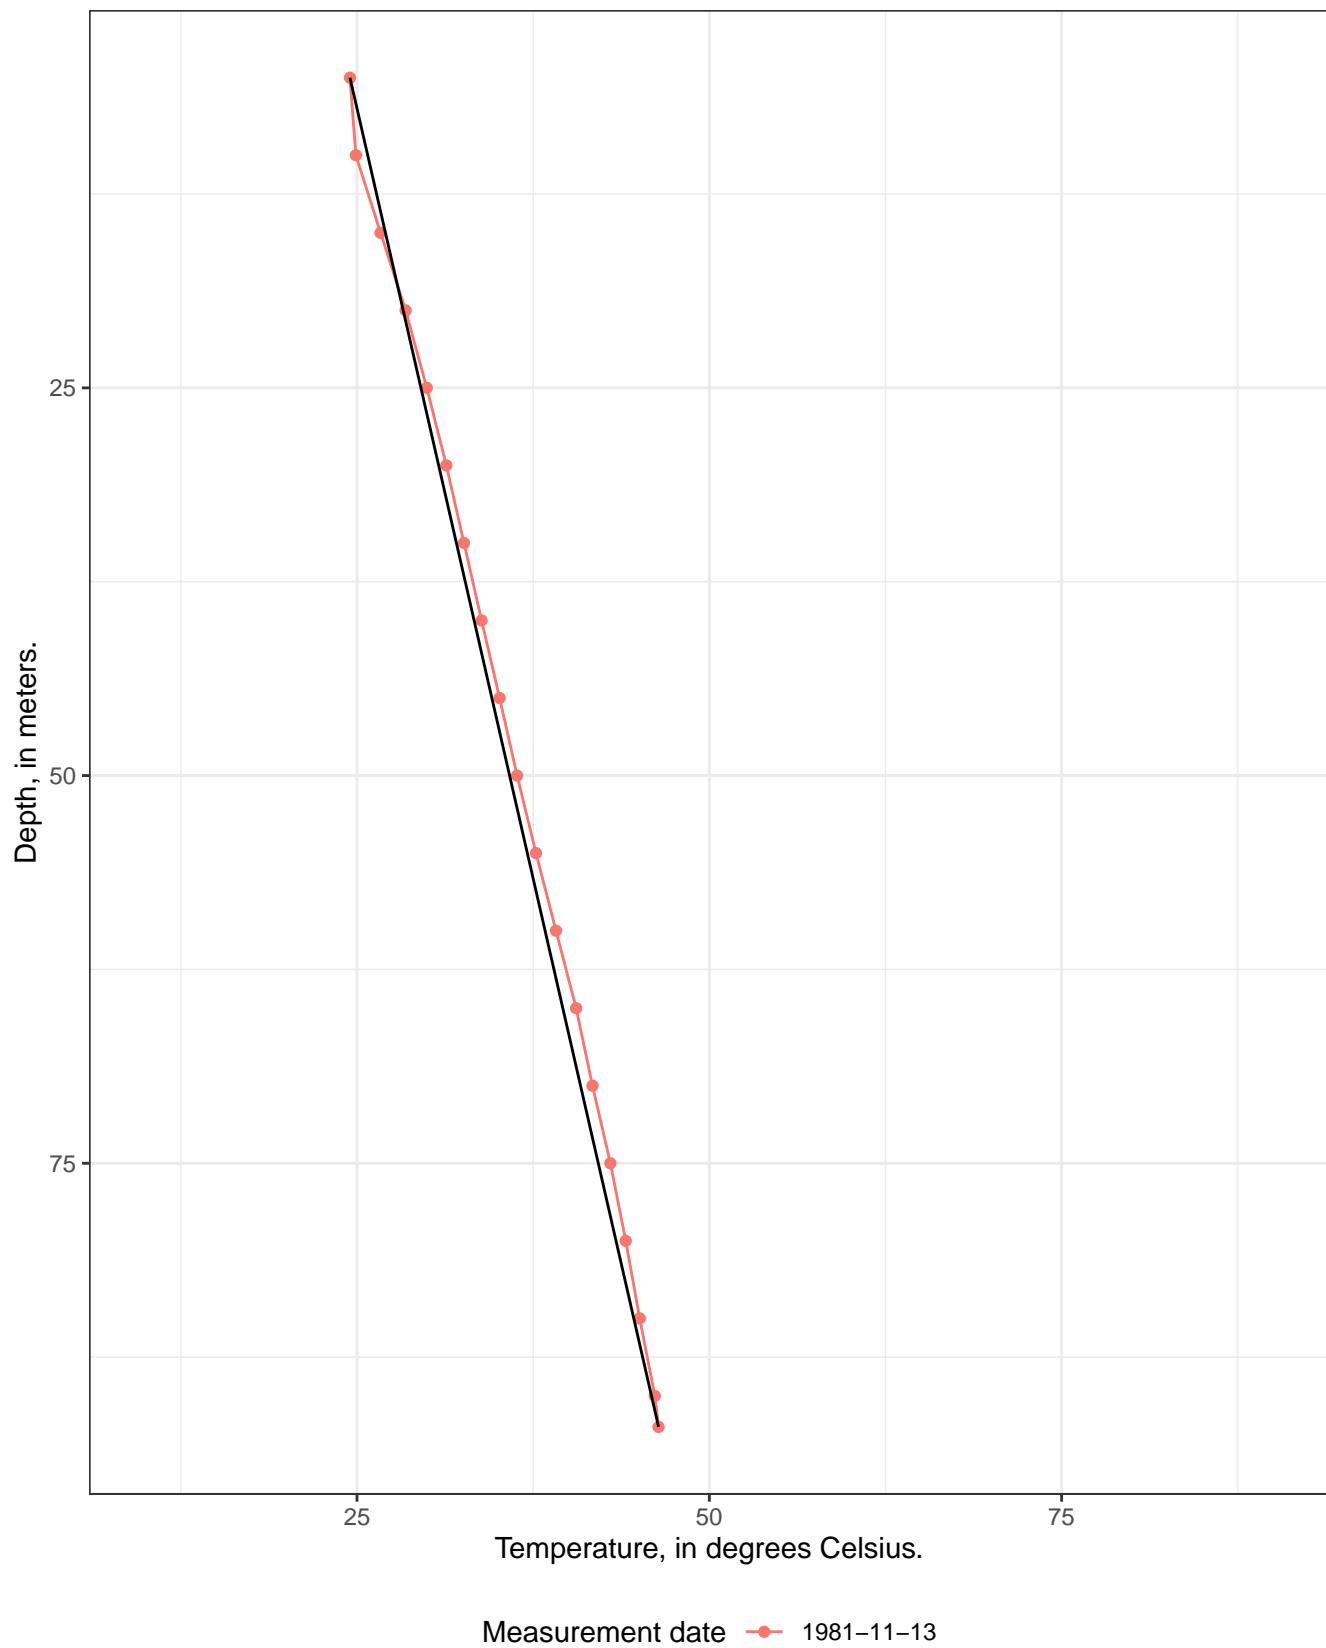

ID: 321 [TG-68\_NMSUEI]

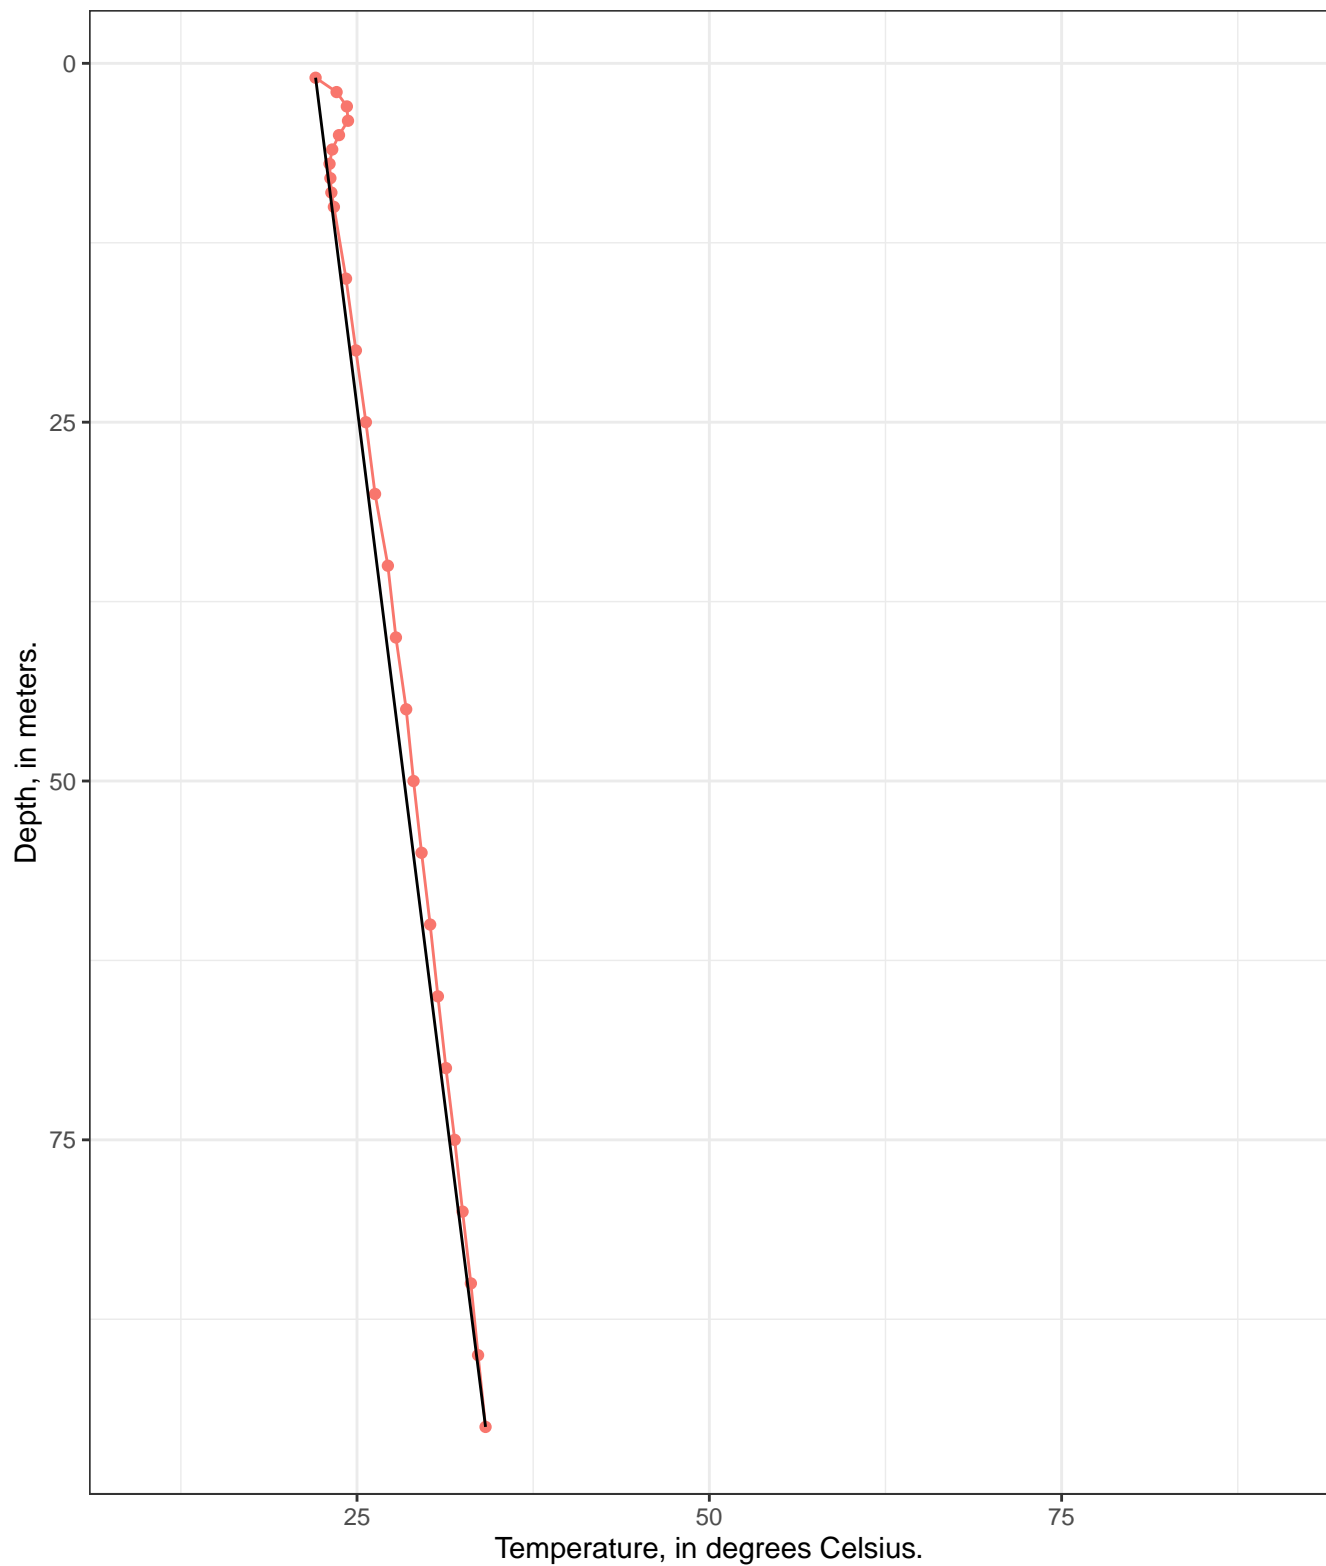

ID: 322 [TG-69\_NMSUEI]

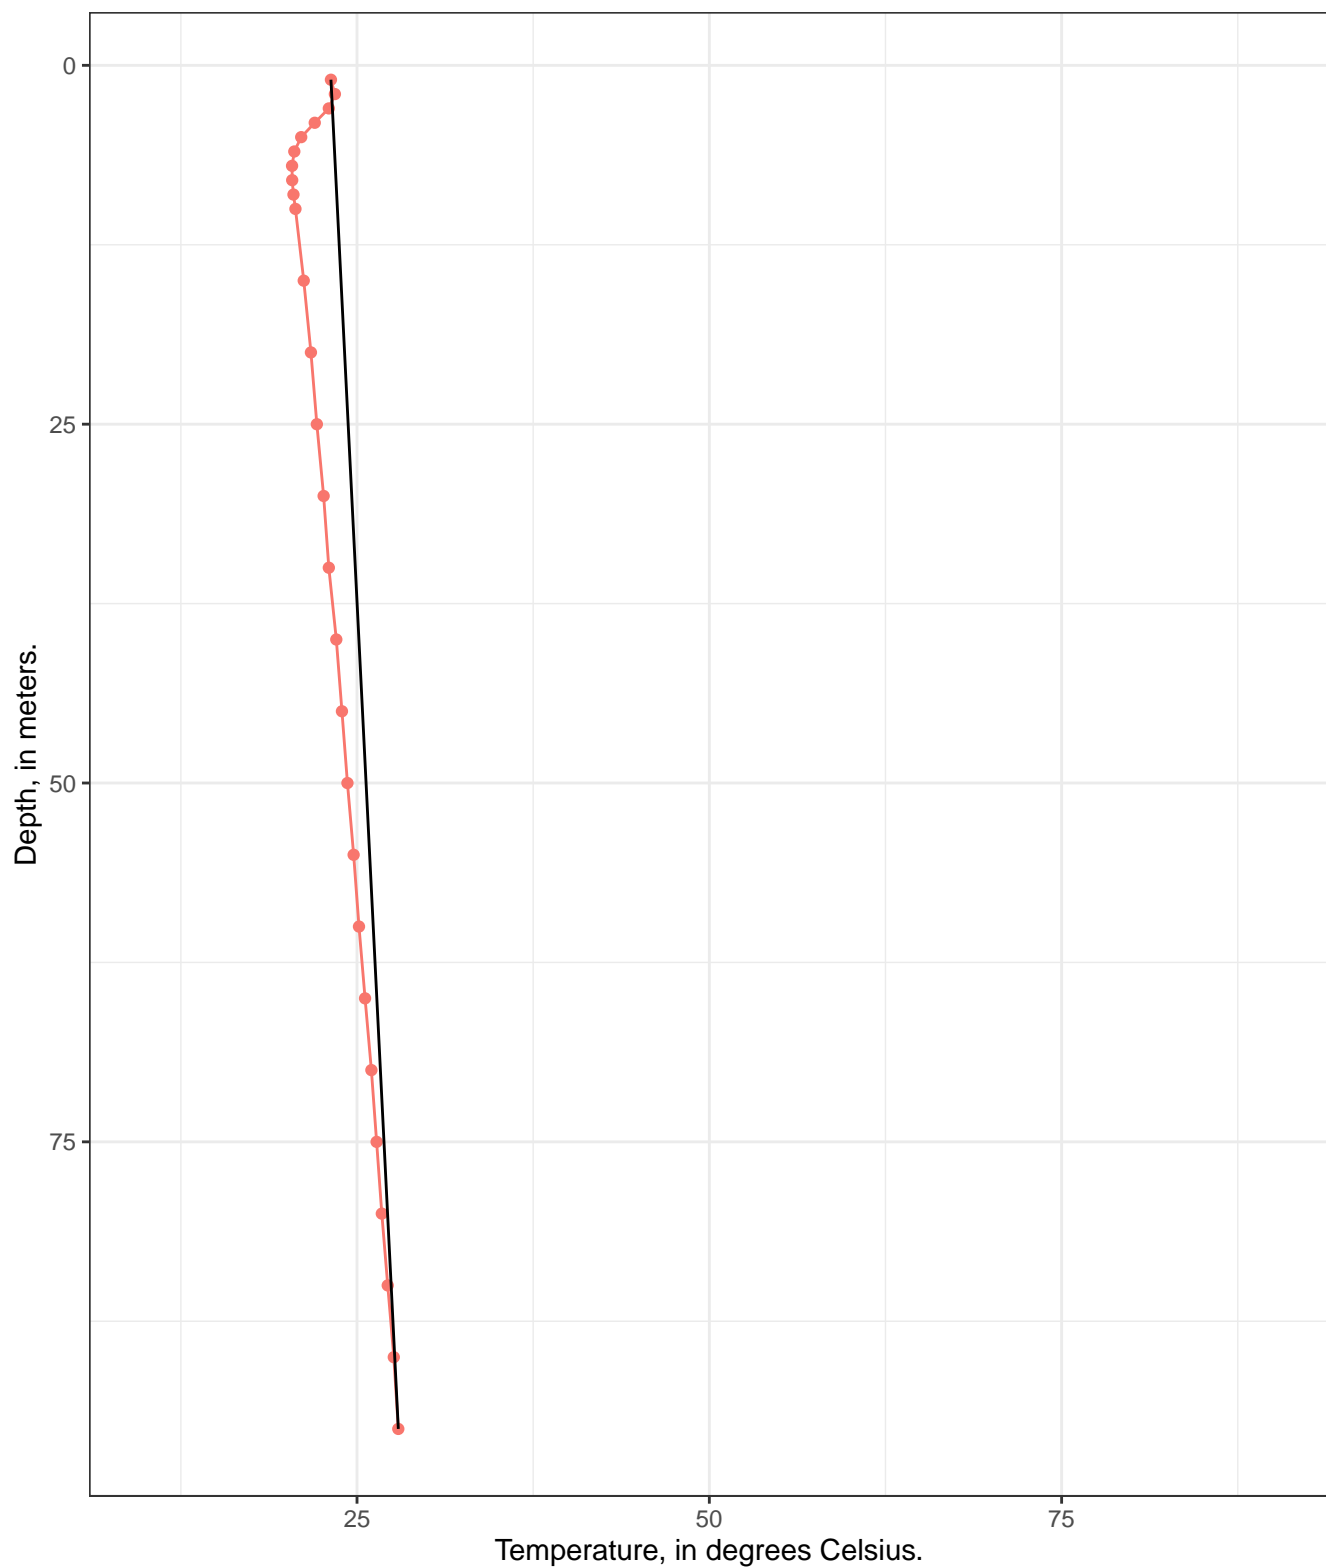

Measurement date 1982-10-05

ID: 323 [TG-70\_NMSUEI]

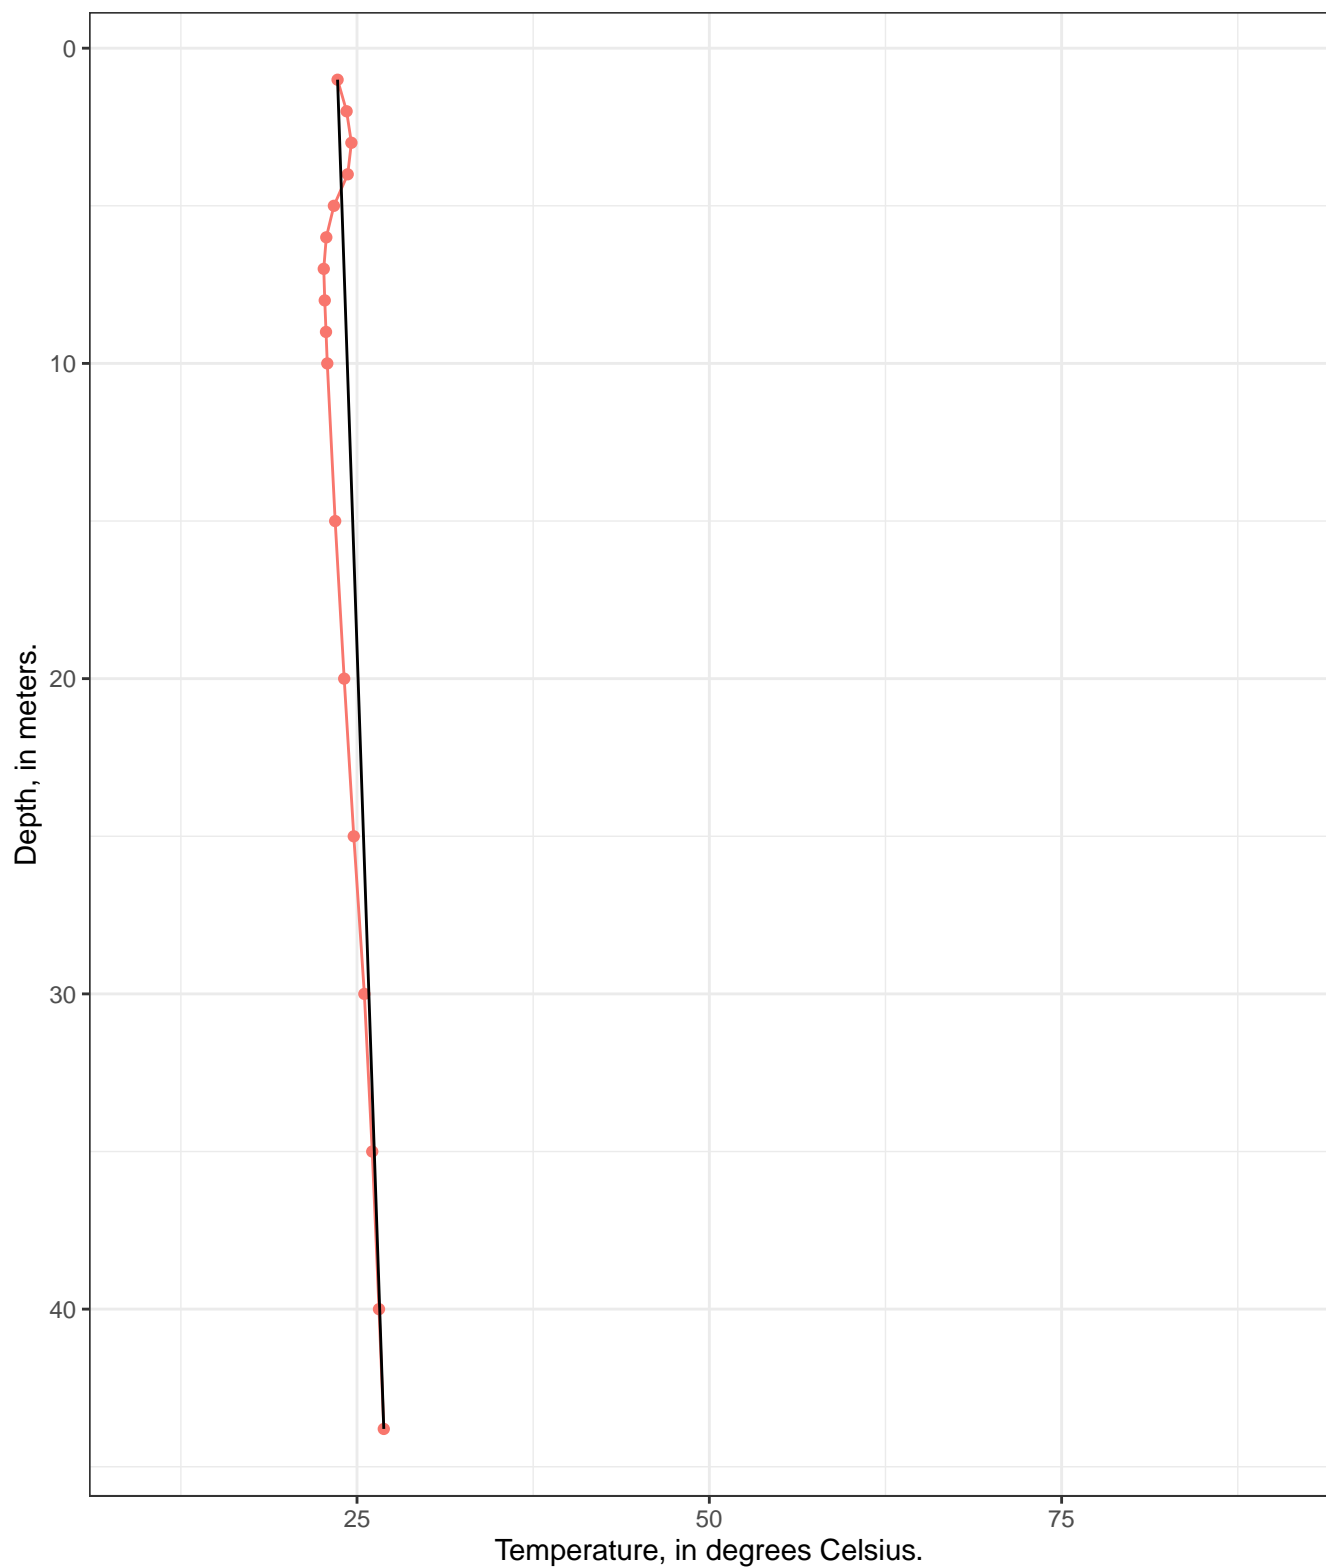

ID: 324 [TG-71\_NMSUEI]

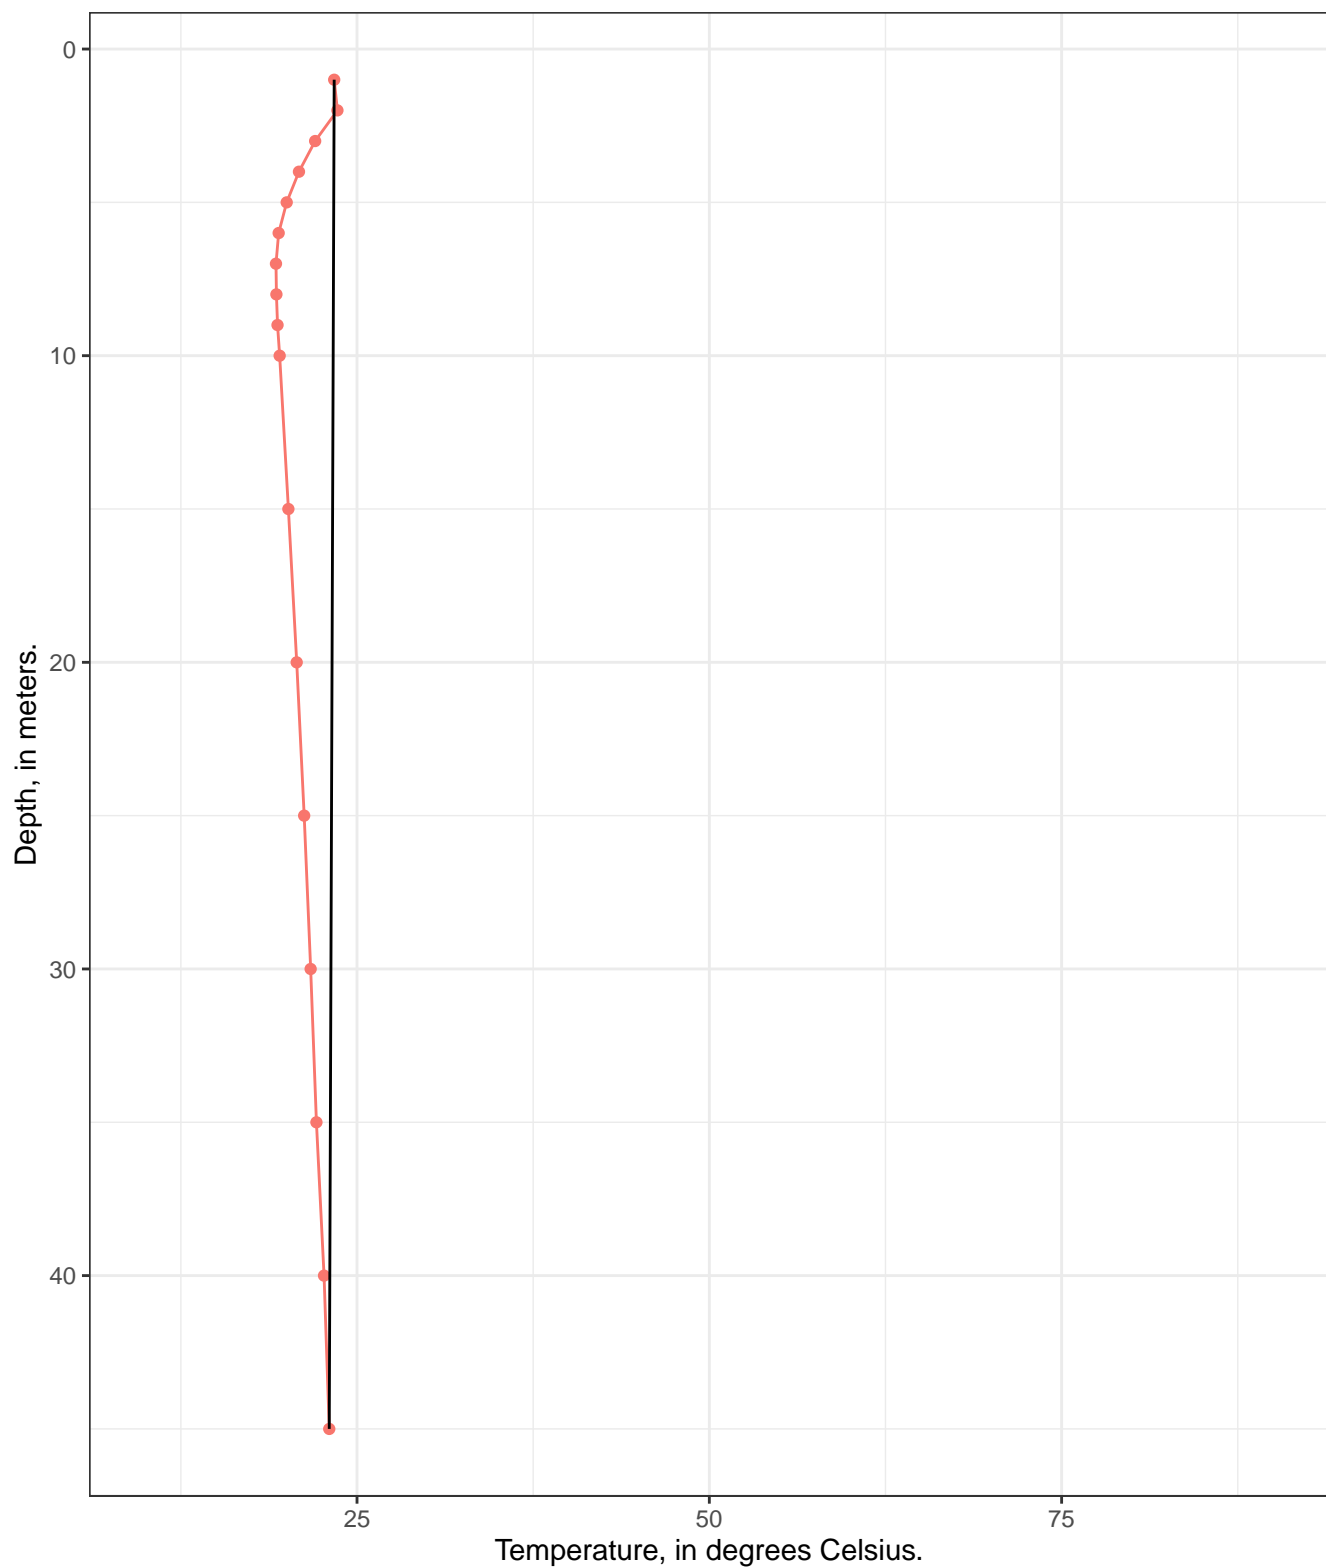

Measurement date 1982-10-05

ID: 325 [TG-72\_NMSUEI]

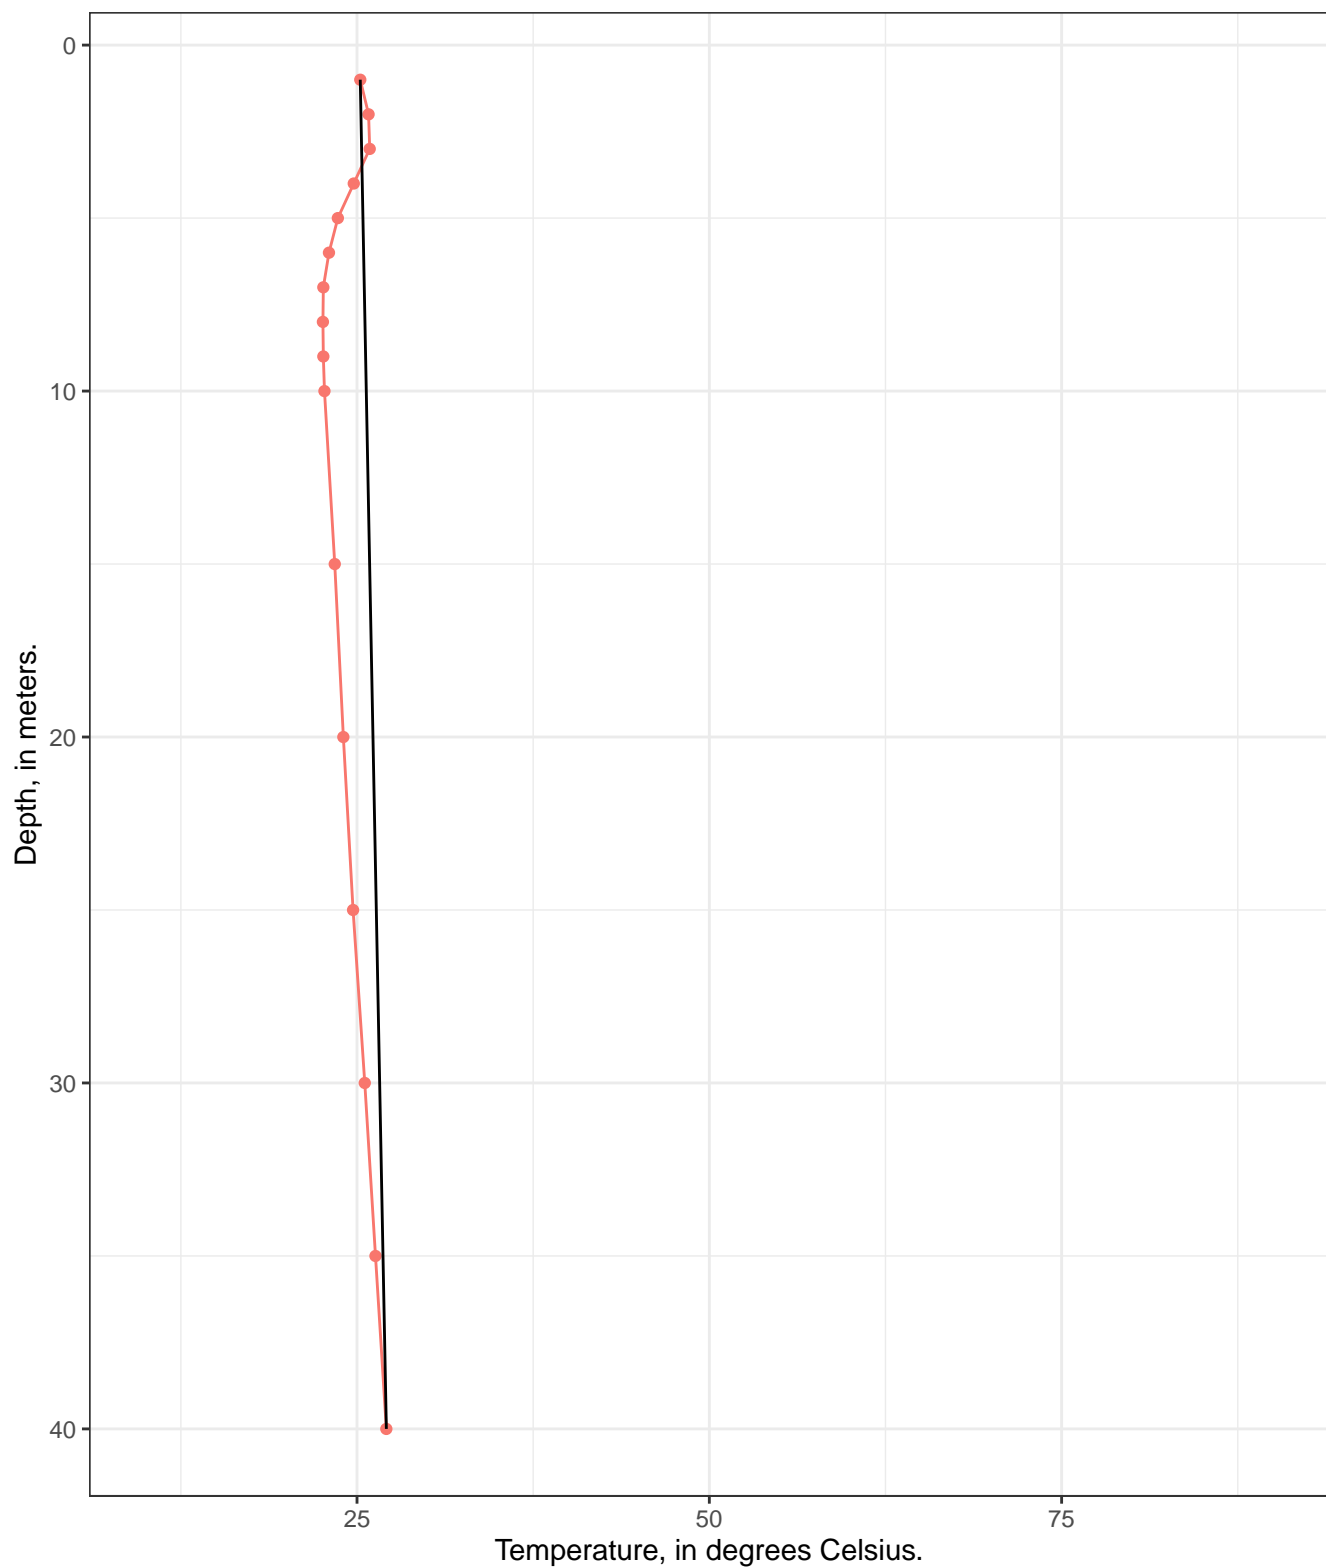

Measurement date 1982-10-05

ID: 326 [TG-73\_NMSUEI]

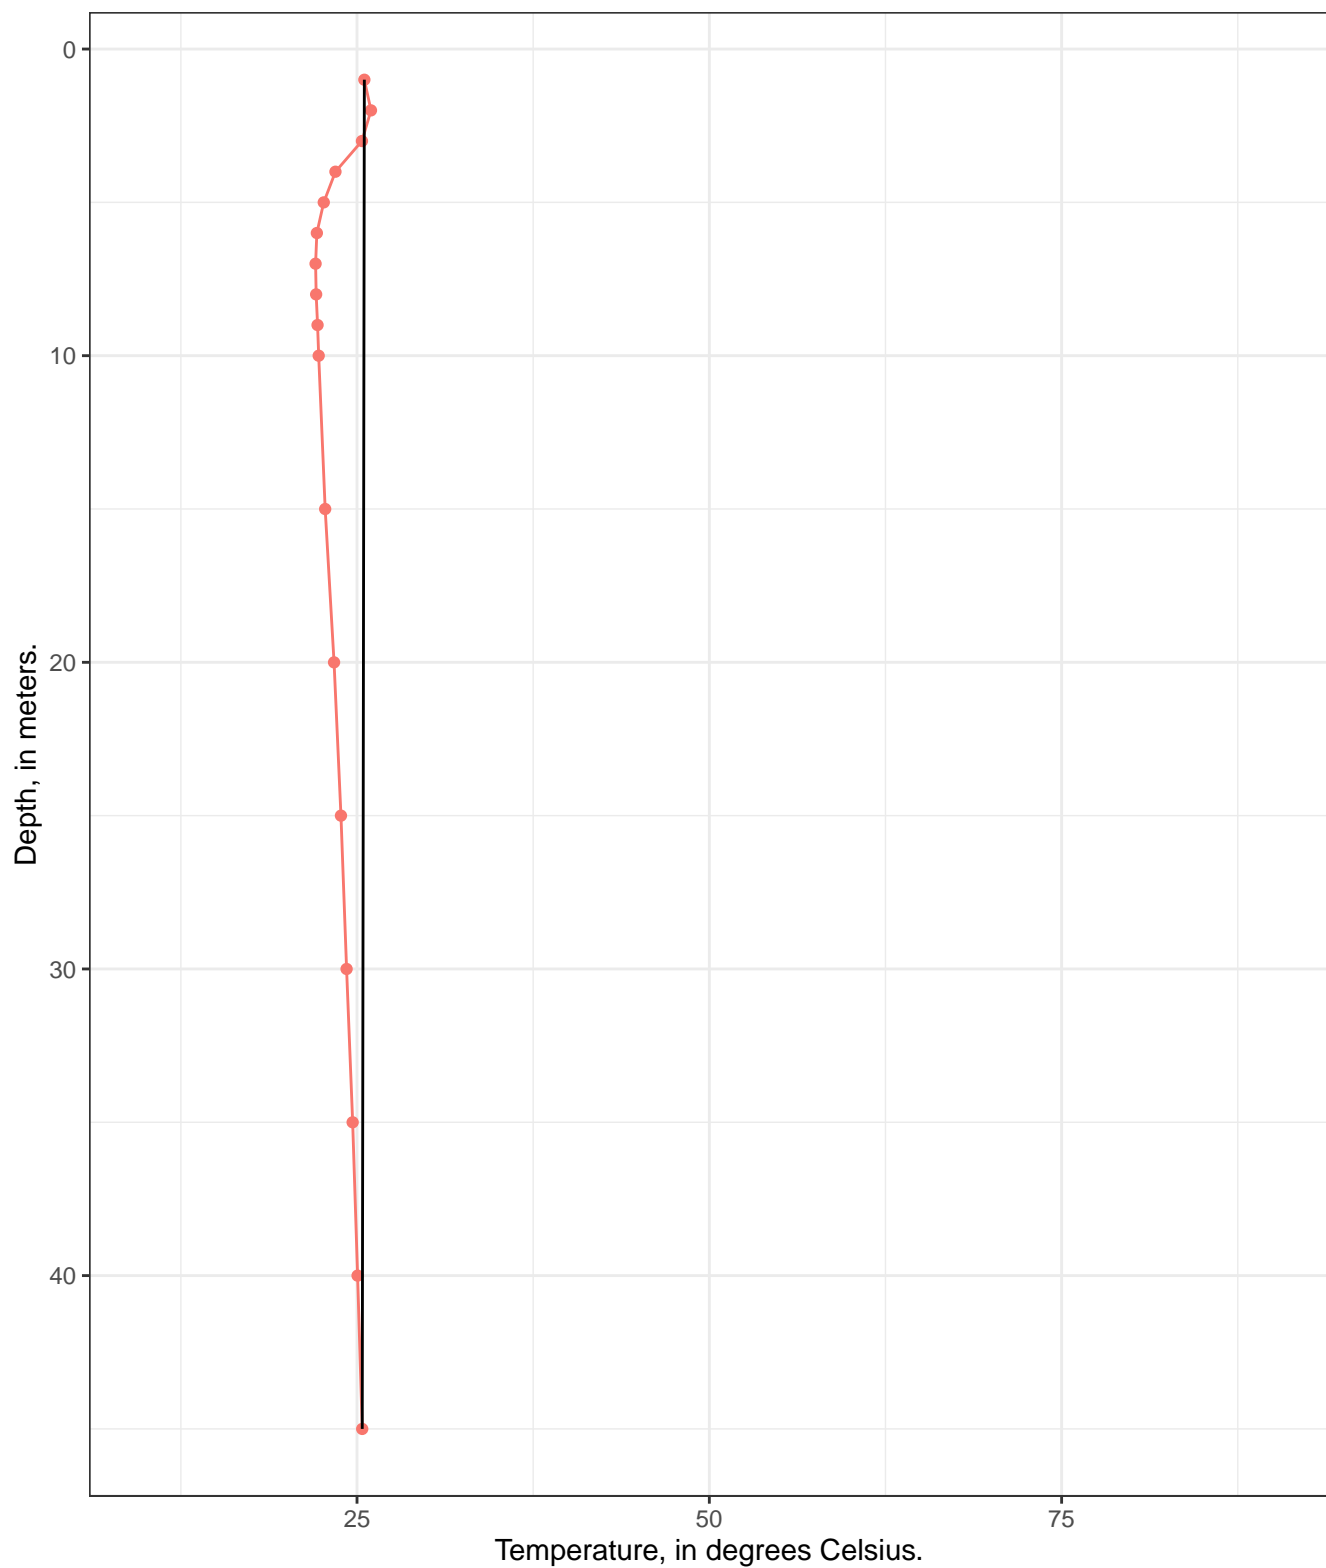

Measurement date 1982-10-04

ID: 327 [TG-74\_NMSUEI]

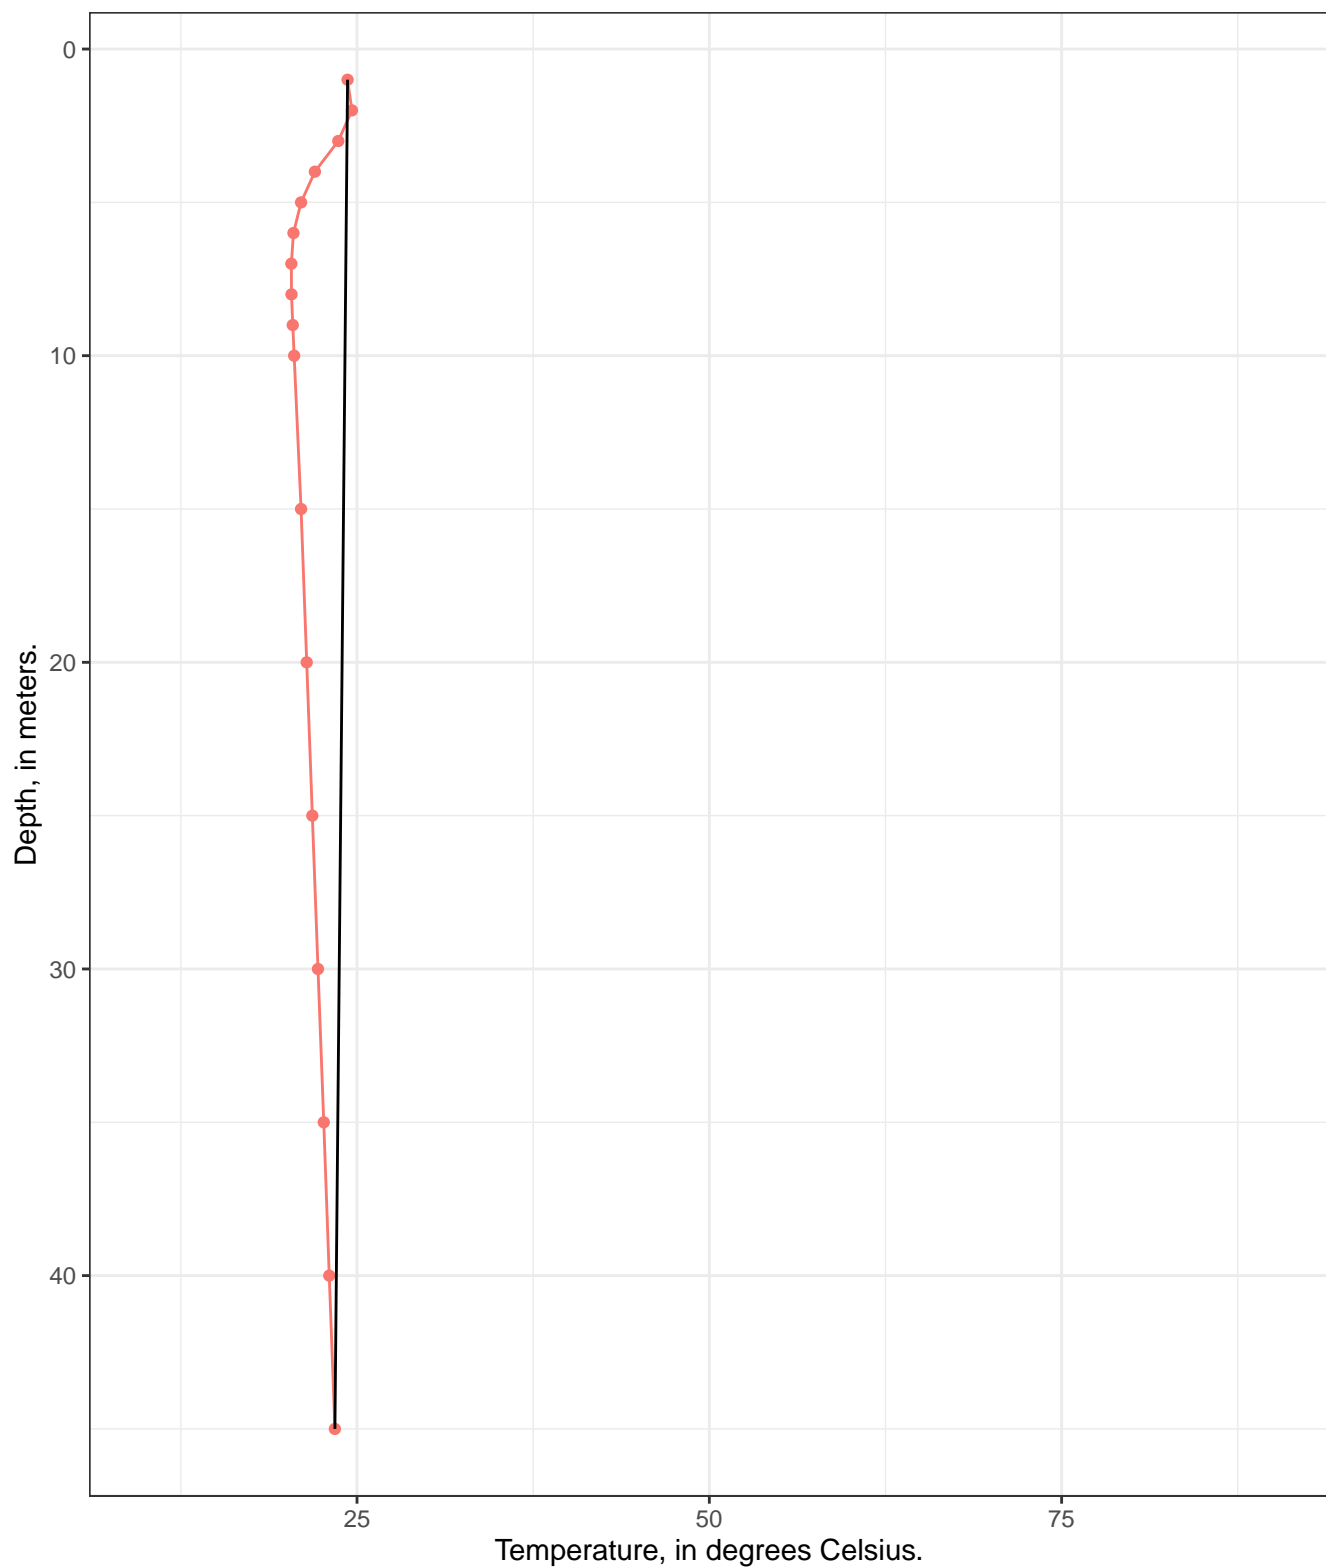

Measurement date 1982-10-04



ID: 328 [TG-76\_NMSUEI]

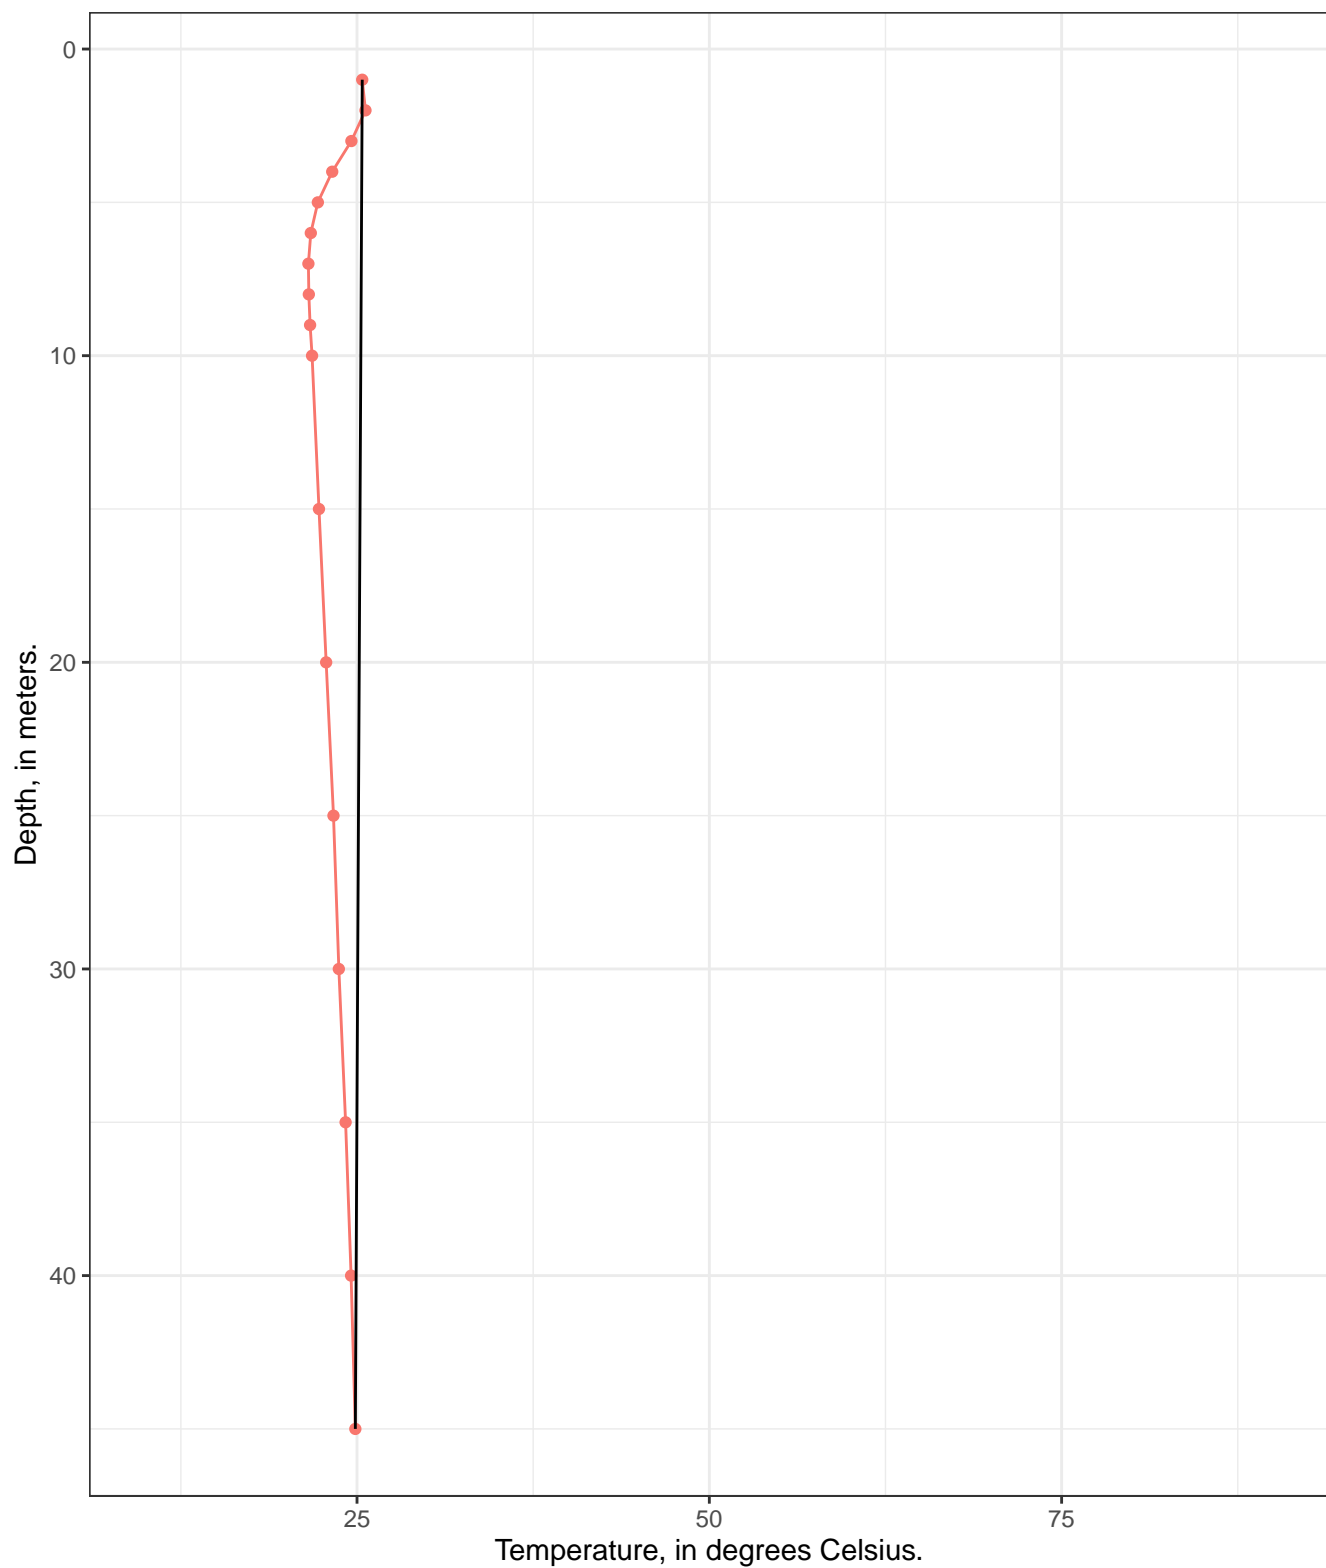

Measurement date 1982-10-05

ID: 329 [TG-77\_NMSUEI]

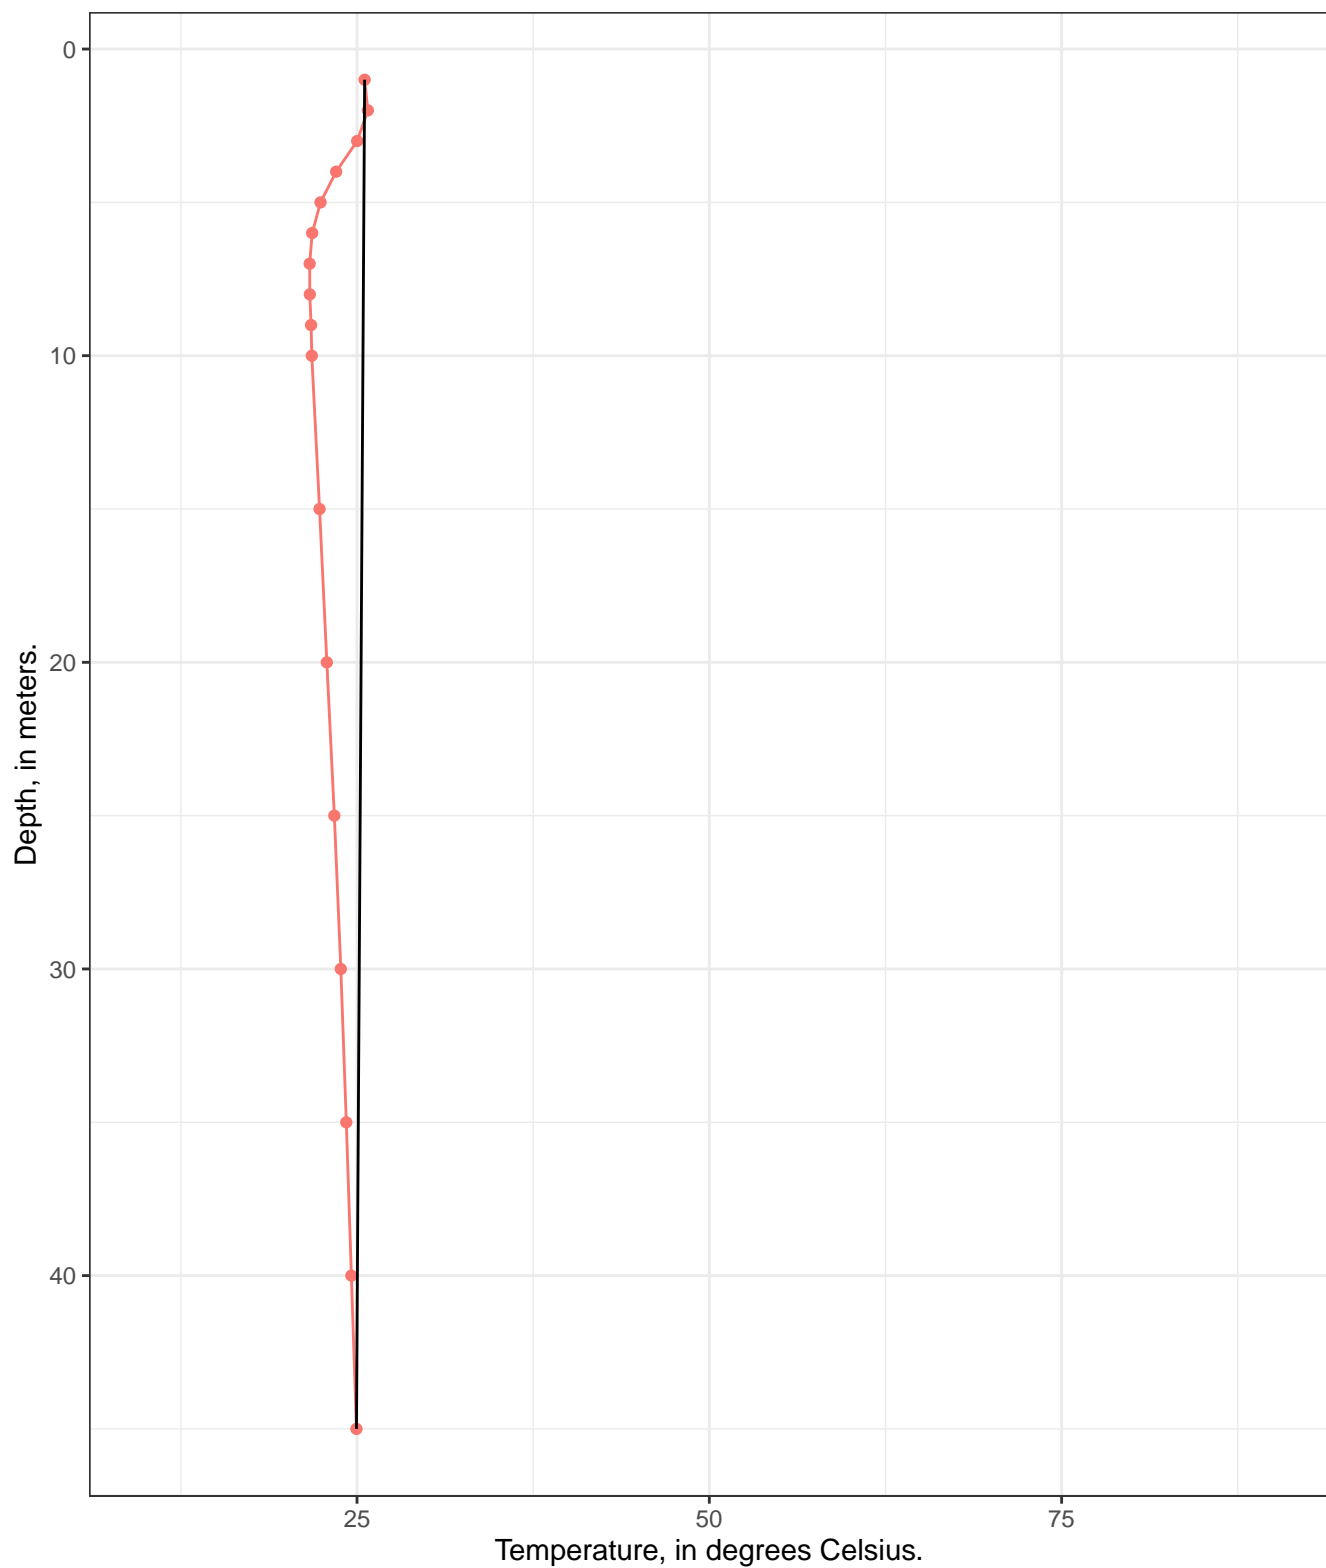

Measurement date 1982-10-05

ID: 330 [TG-79\_NMSUEI]

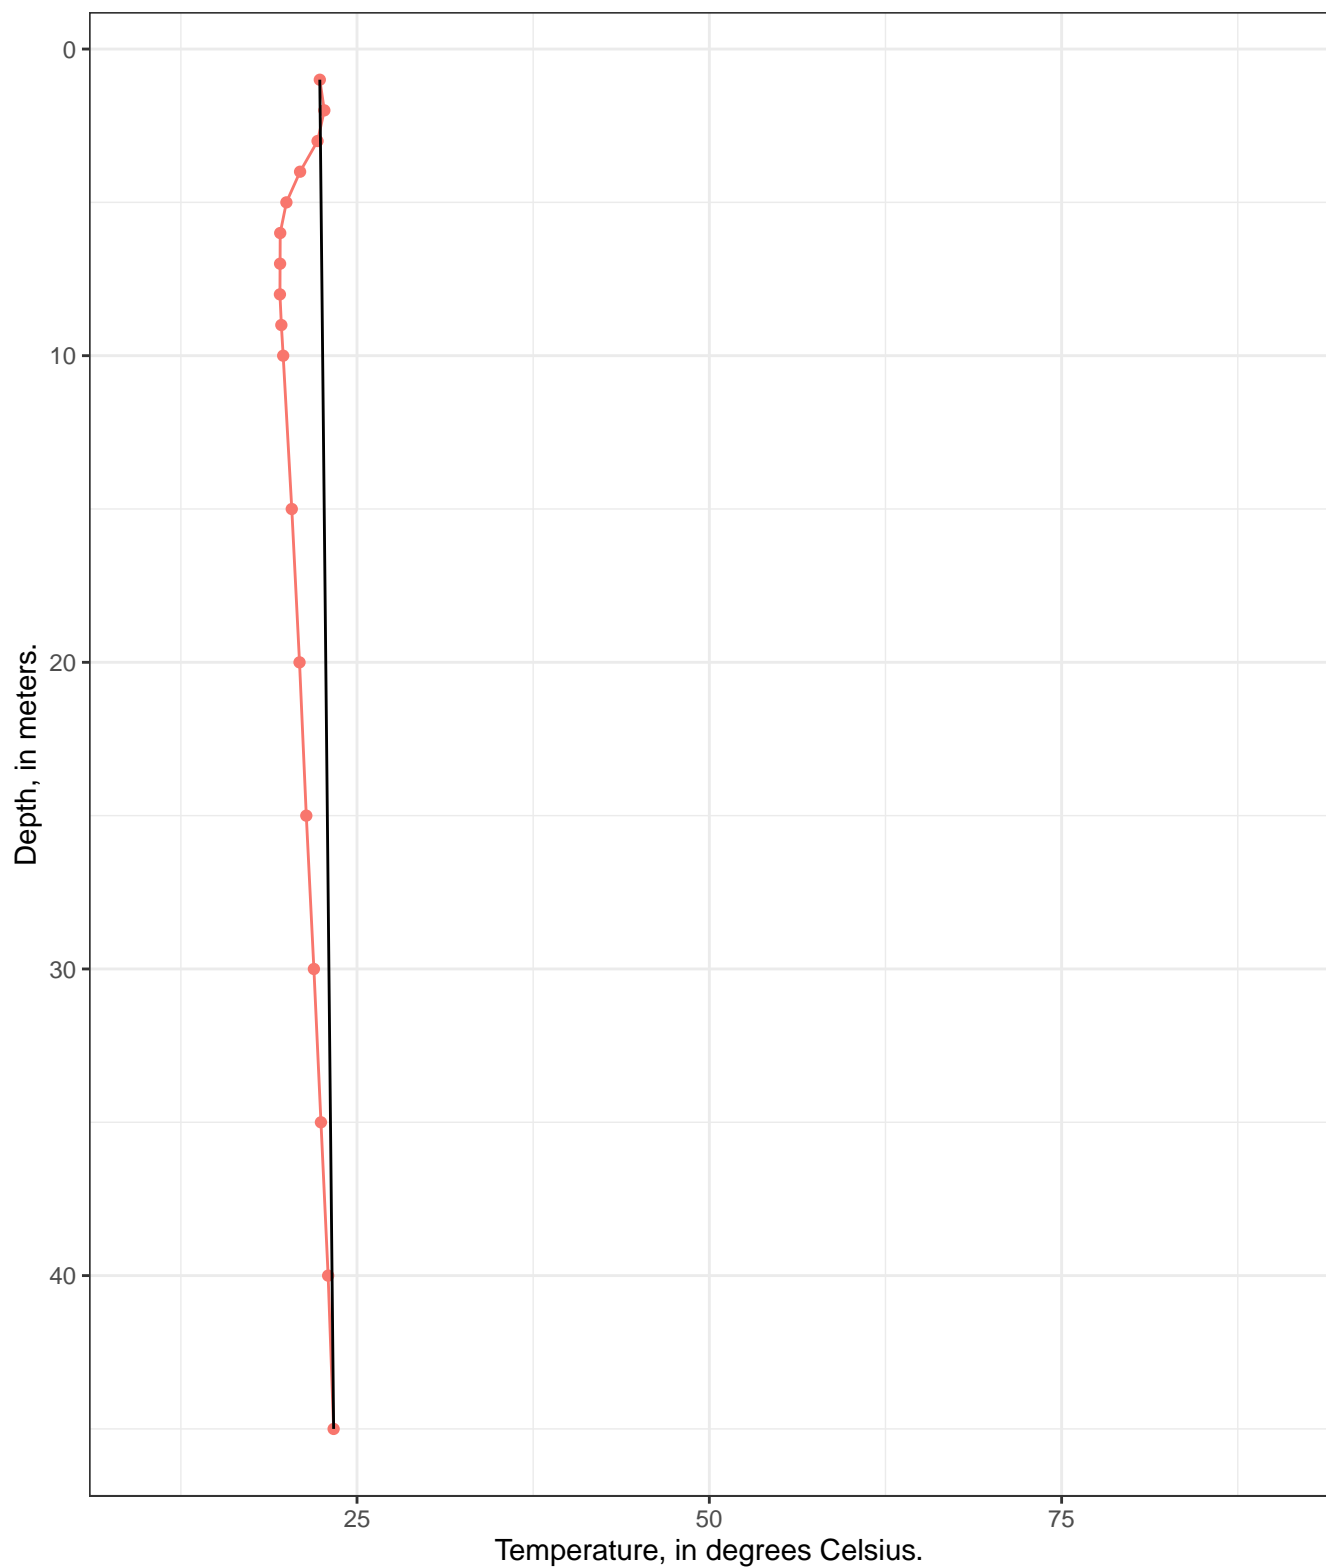

Measurement date 1980-10-05

ID: 331 [TG-80\_NMSUEI]

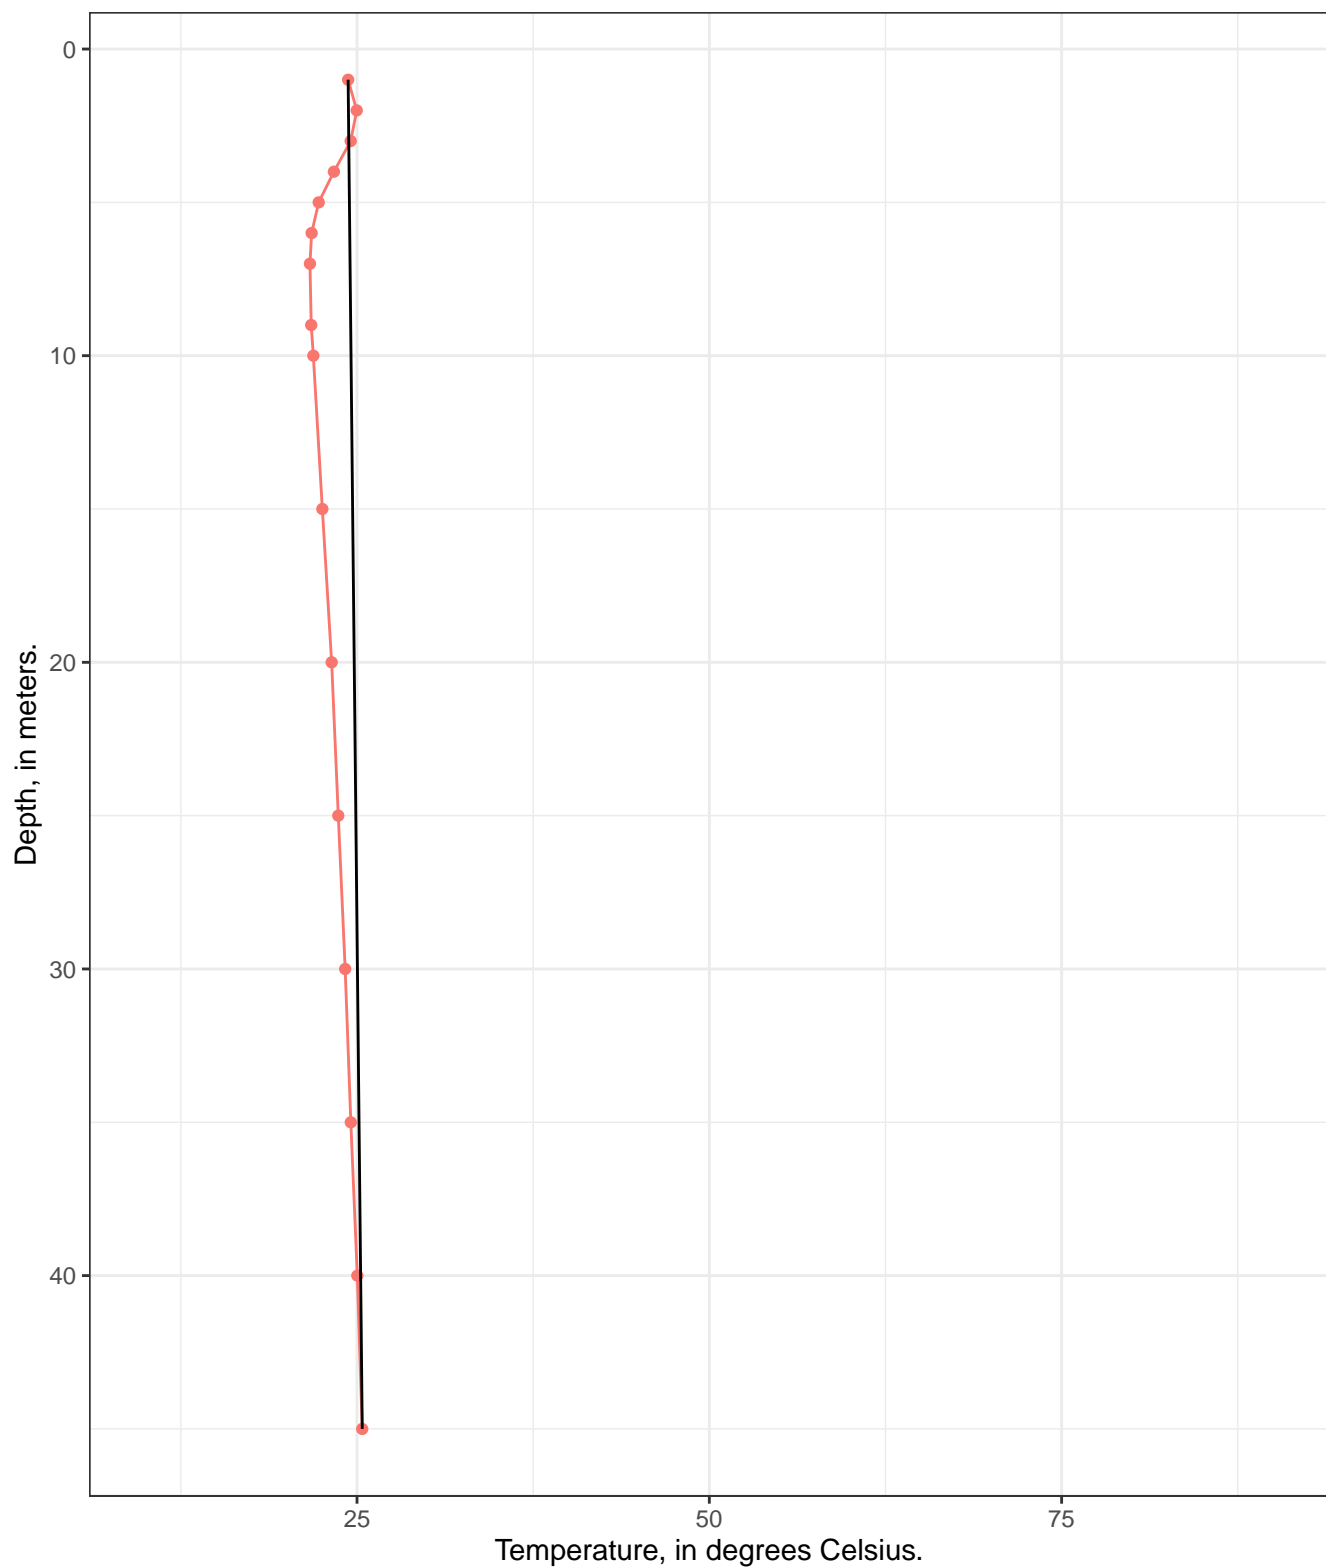

Measurement date 1982-10-06

ID: 332 [TG-81\_NMSUEI]

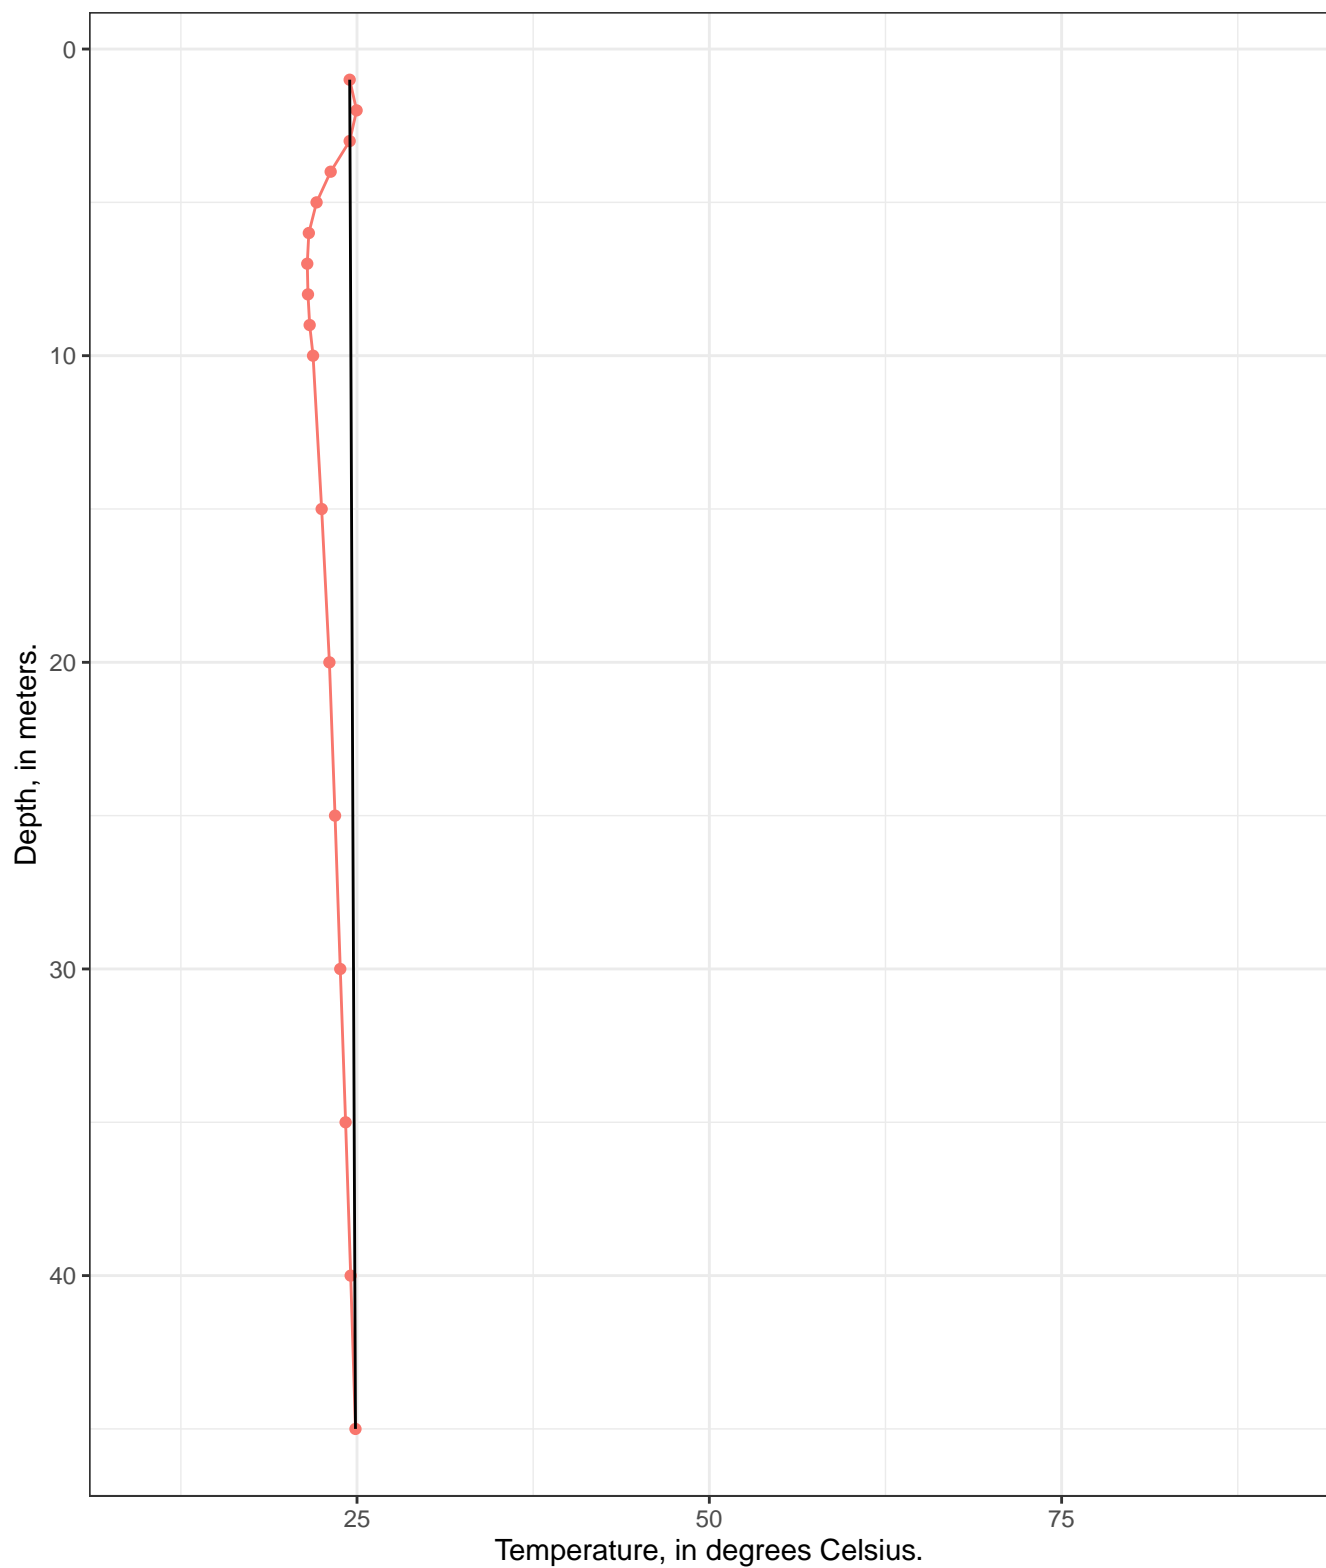

Measurement date 1982-10-06

ID: 333 [TG-82\_NMSUEI]

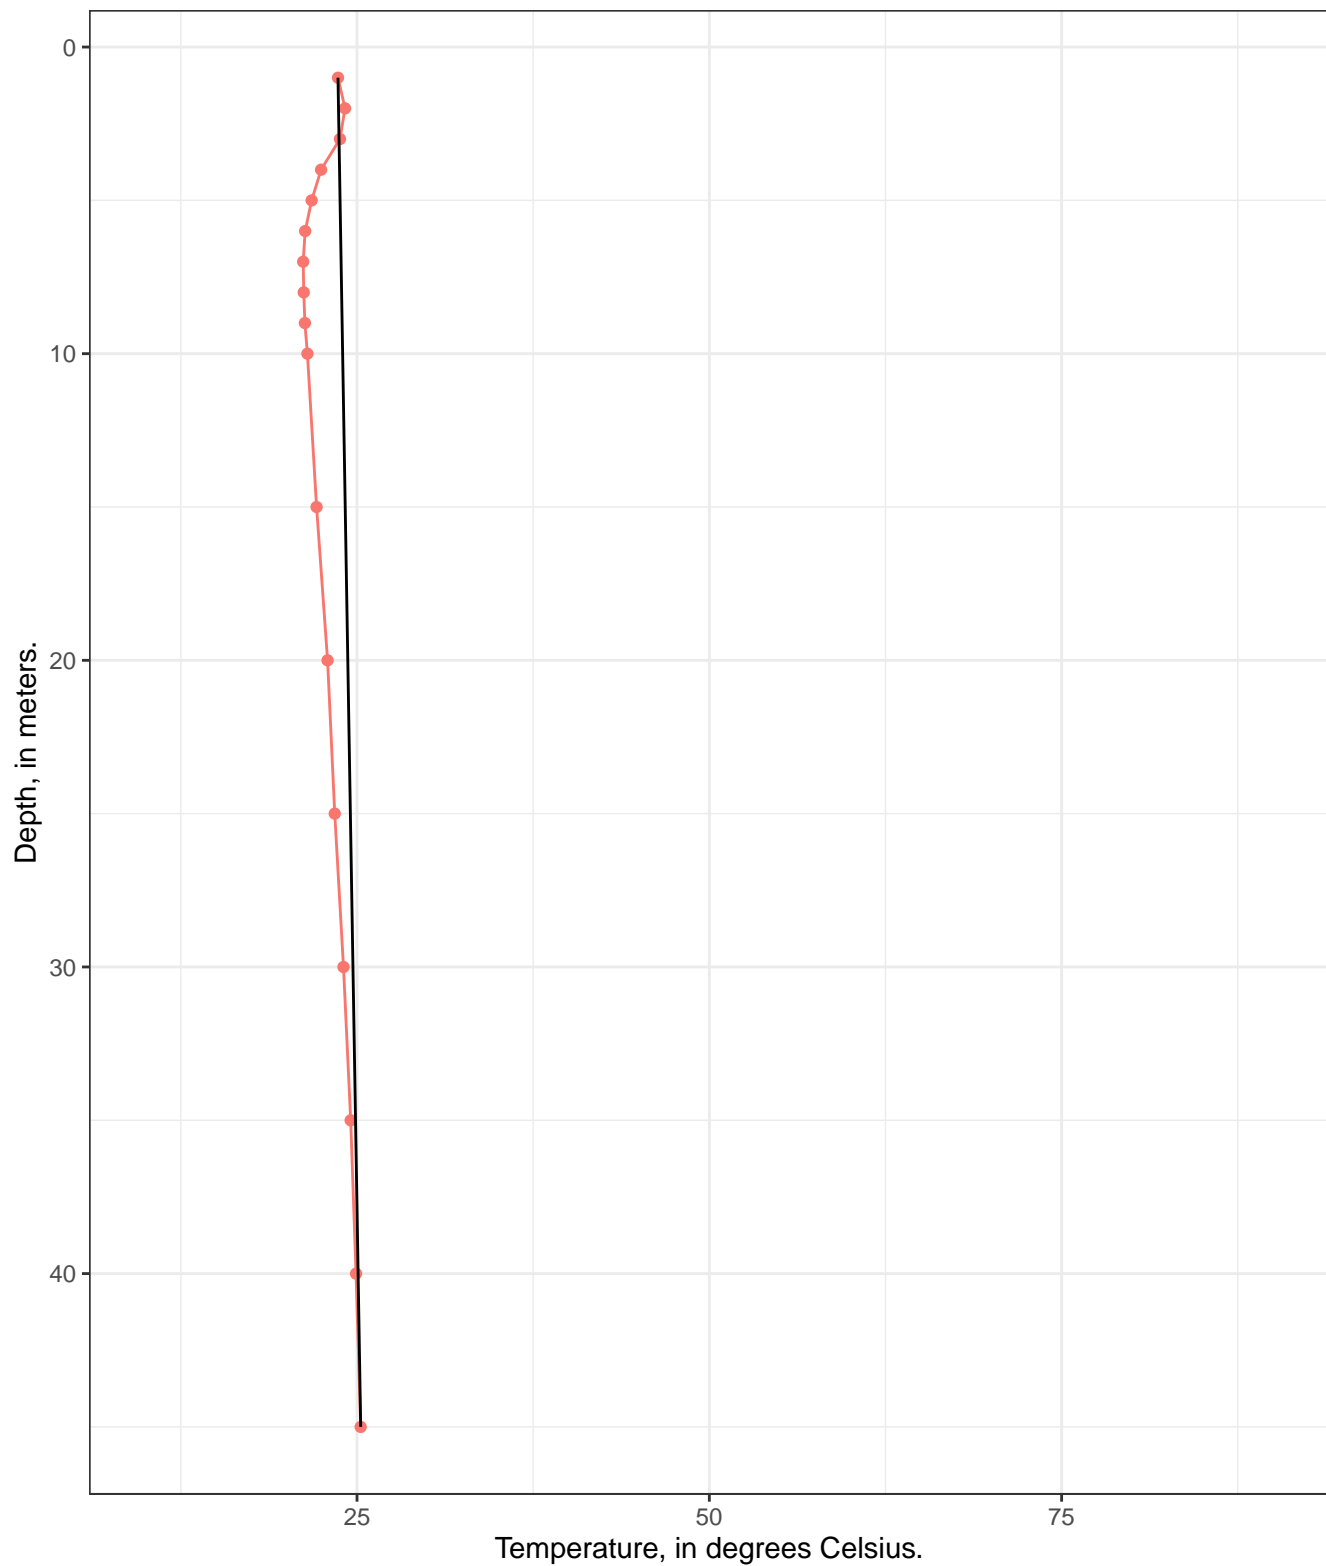

Measurement date 1982-10-06

ID: 334 [TG-83\_NMSUEI]

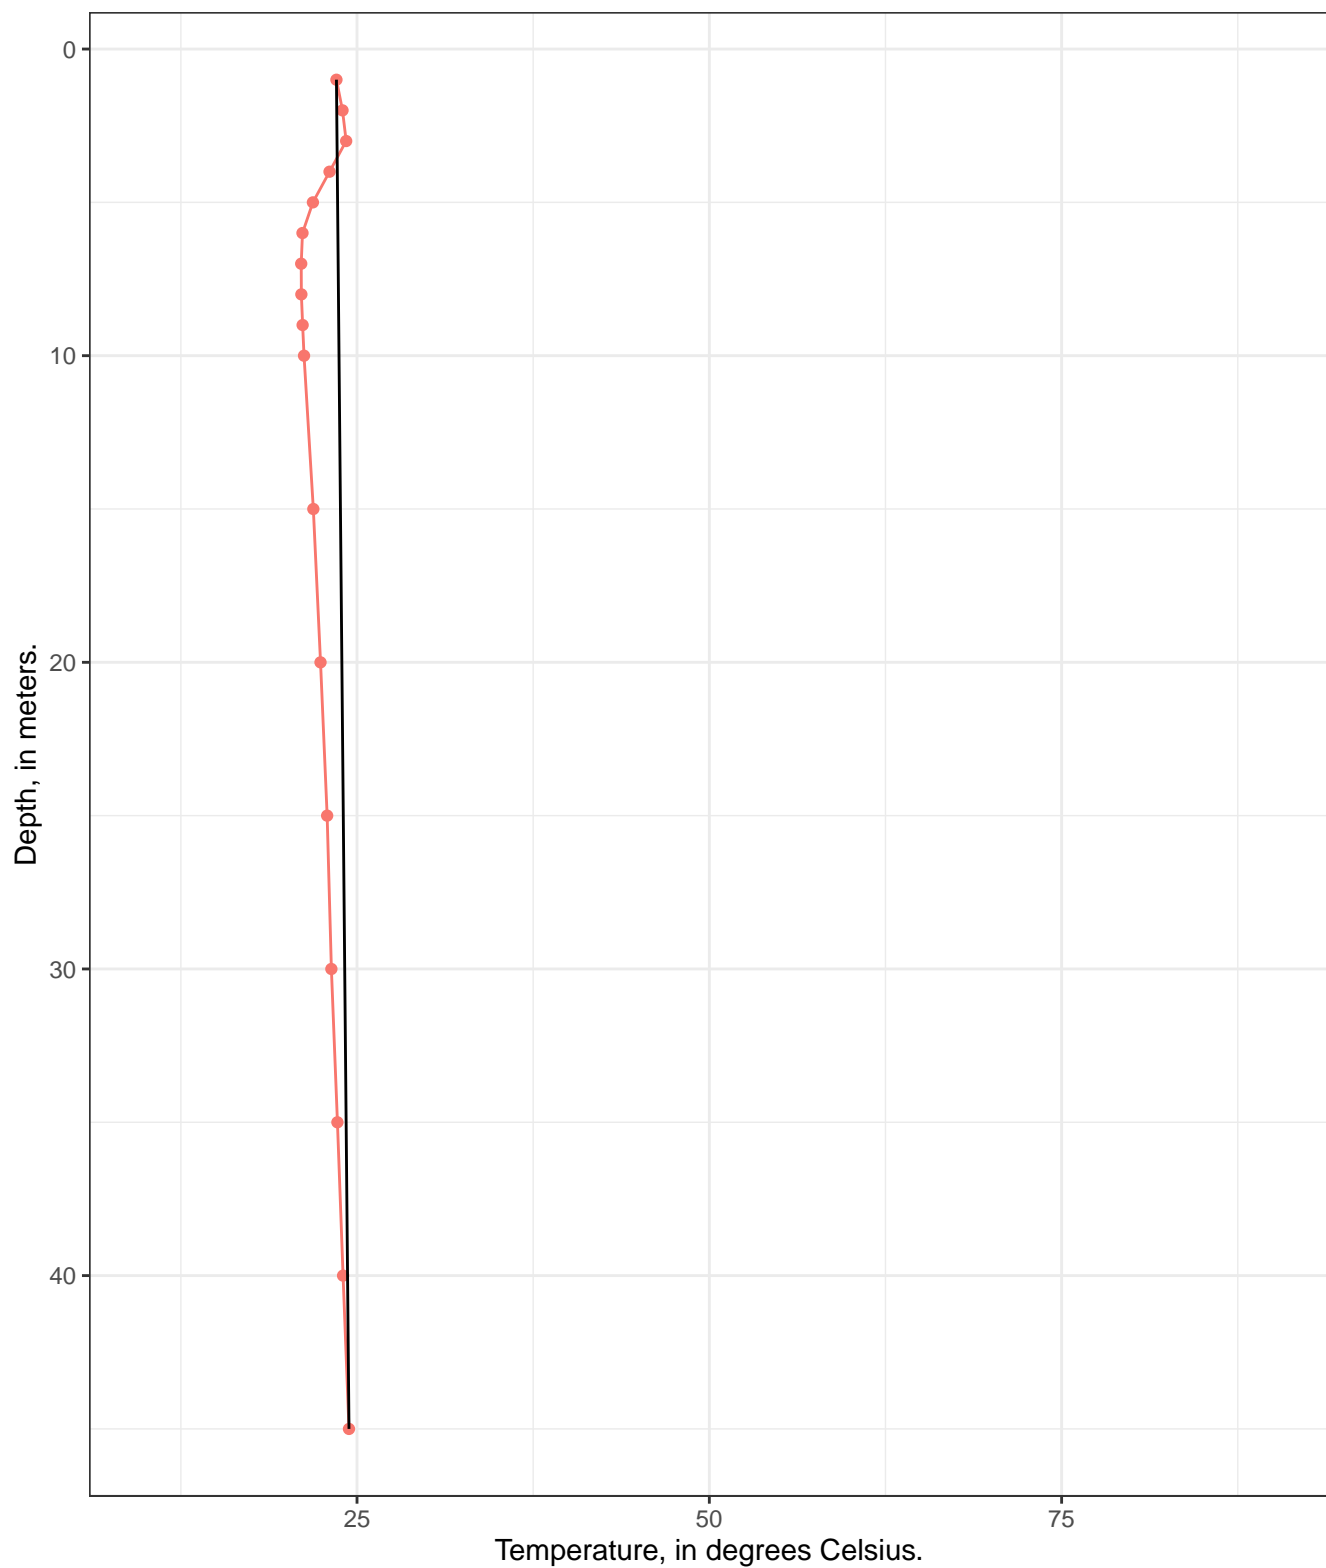

Measurement date 1982-10-06

ID: 335 [TG-84\_NMSUEI]

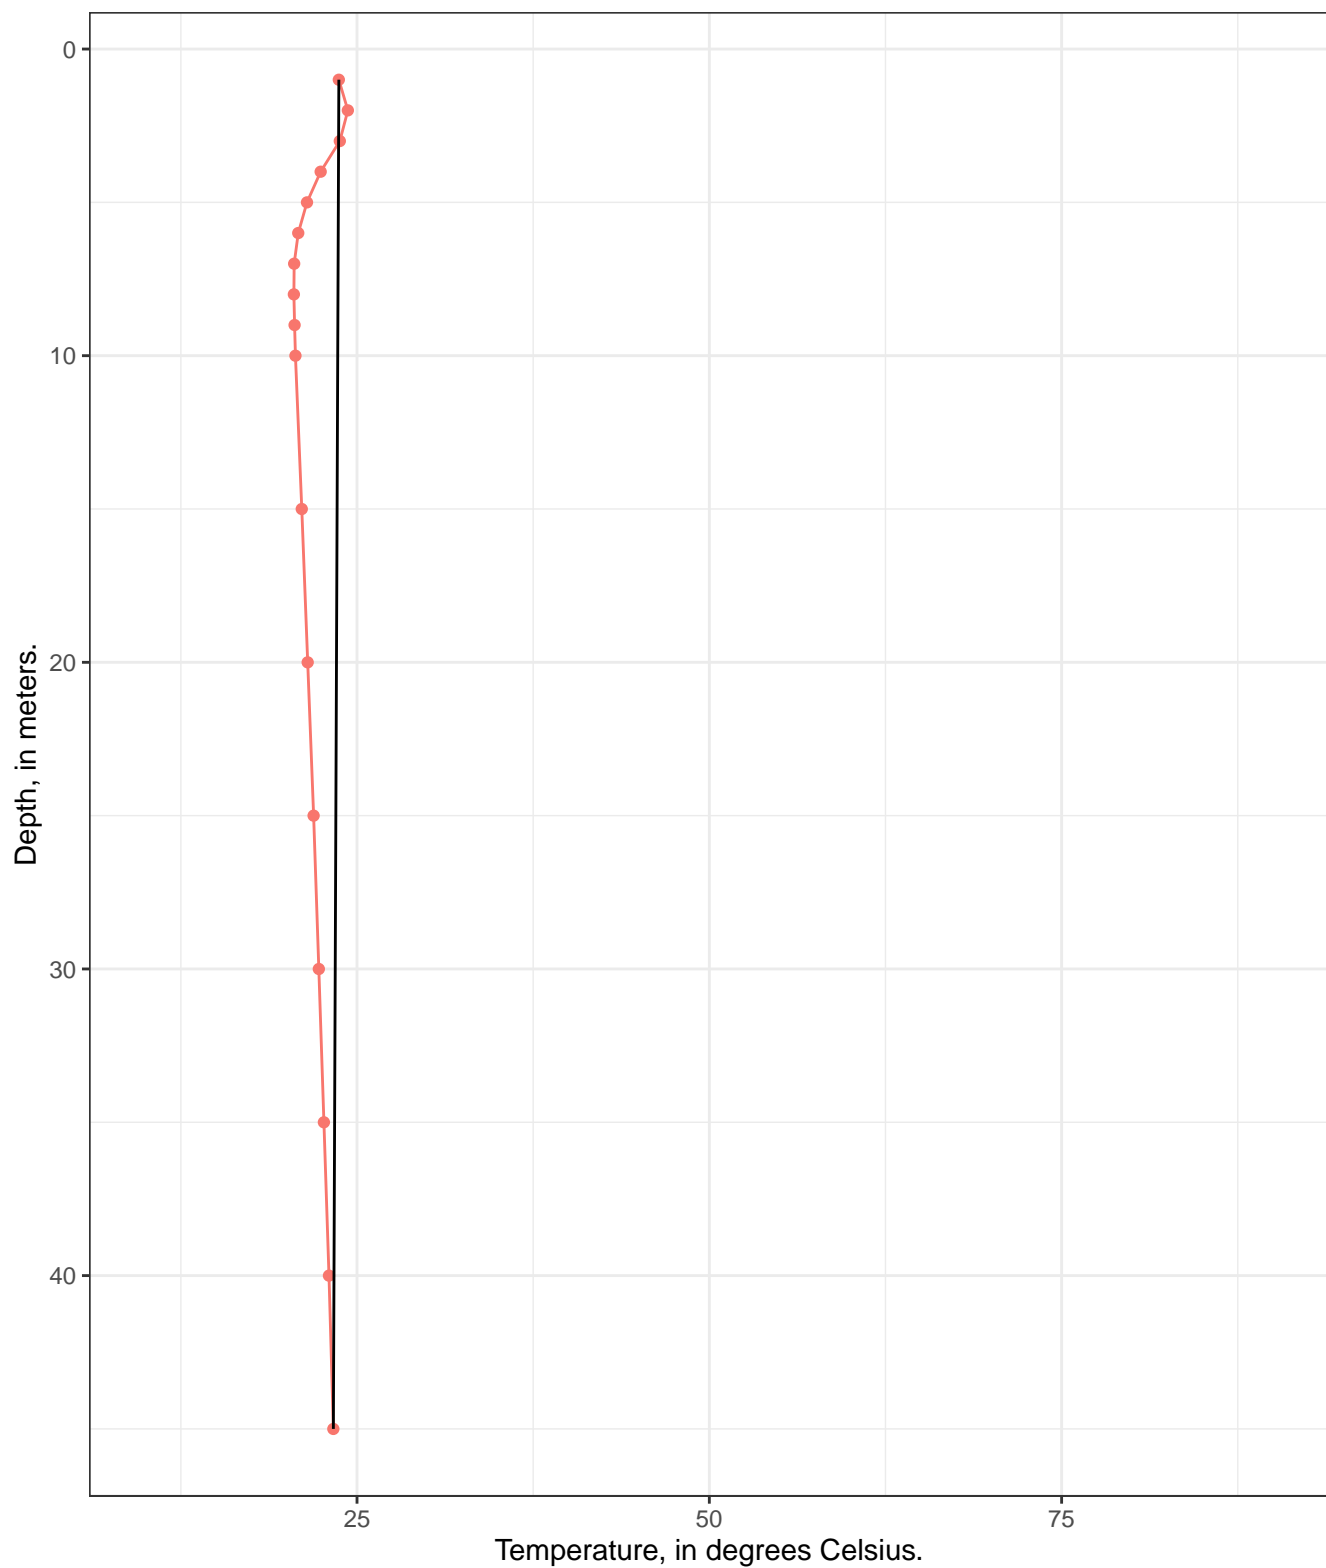

Measurement date 1982-10-06



ID: 336 [TG-85\_NMSUEI]

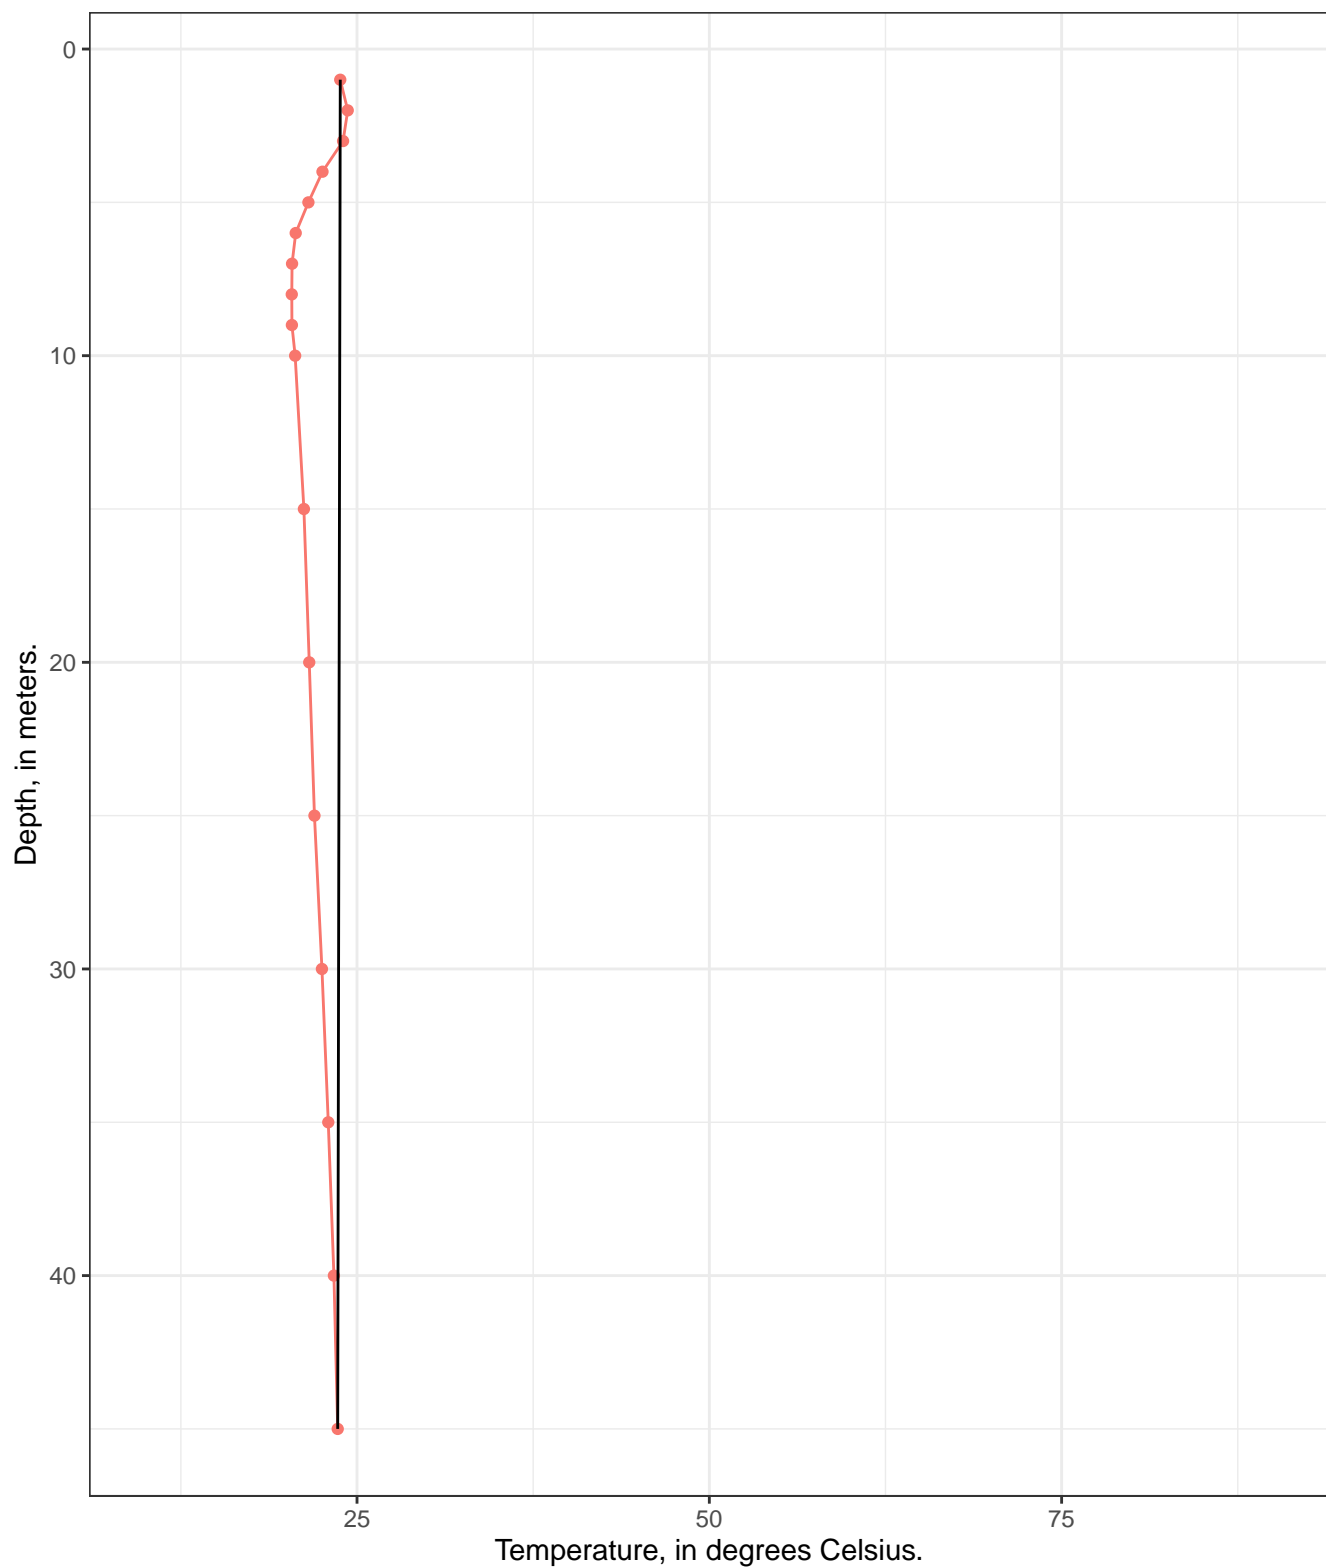

Measurement date 1982-10-06

ID: 337 [TG-86\_NMSUEI]

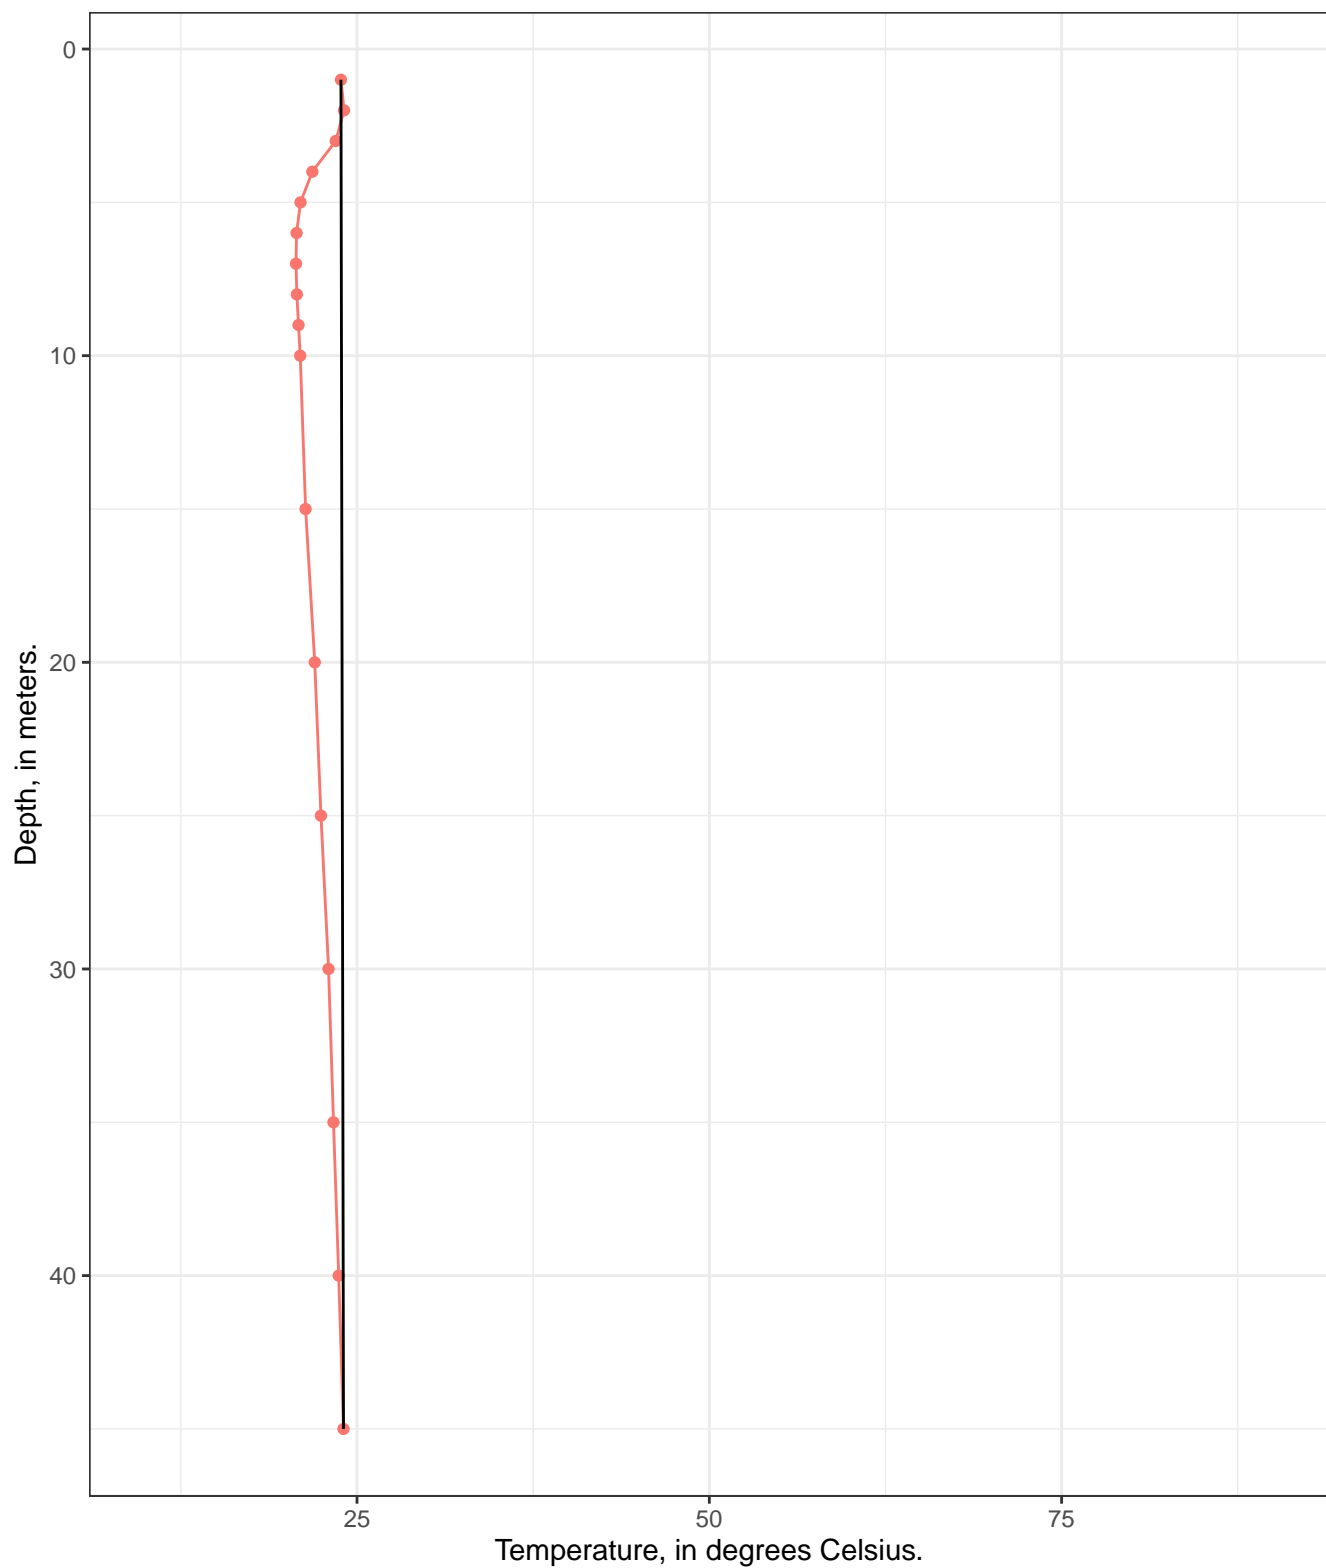

Measurement date 1982-10-07

ID: 338 [TG-87\_NMSUEI]

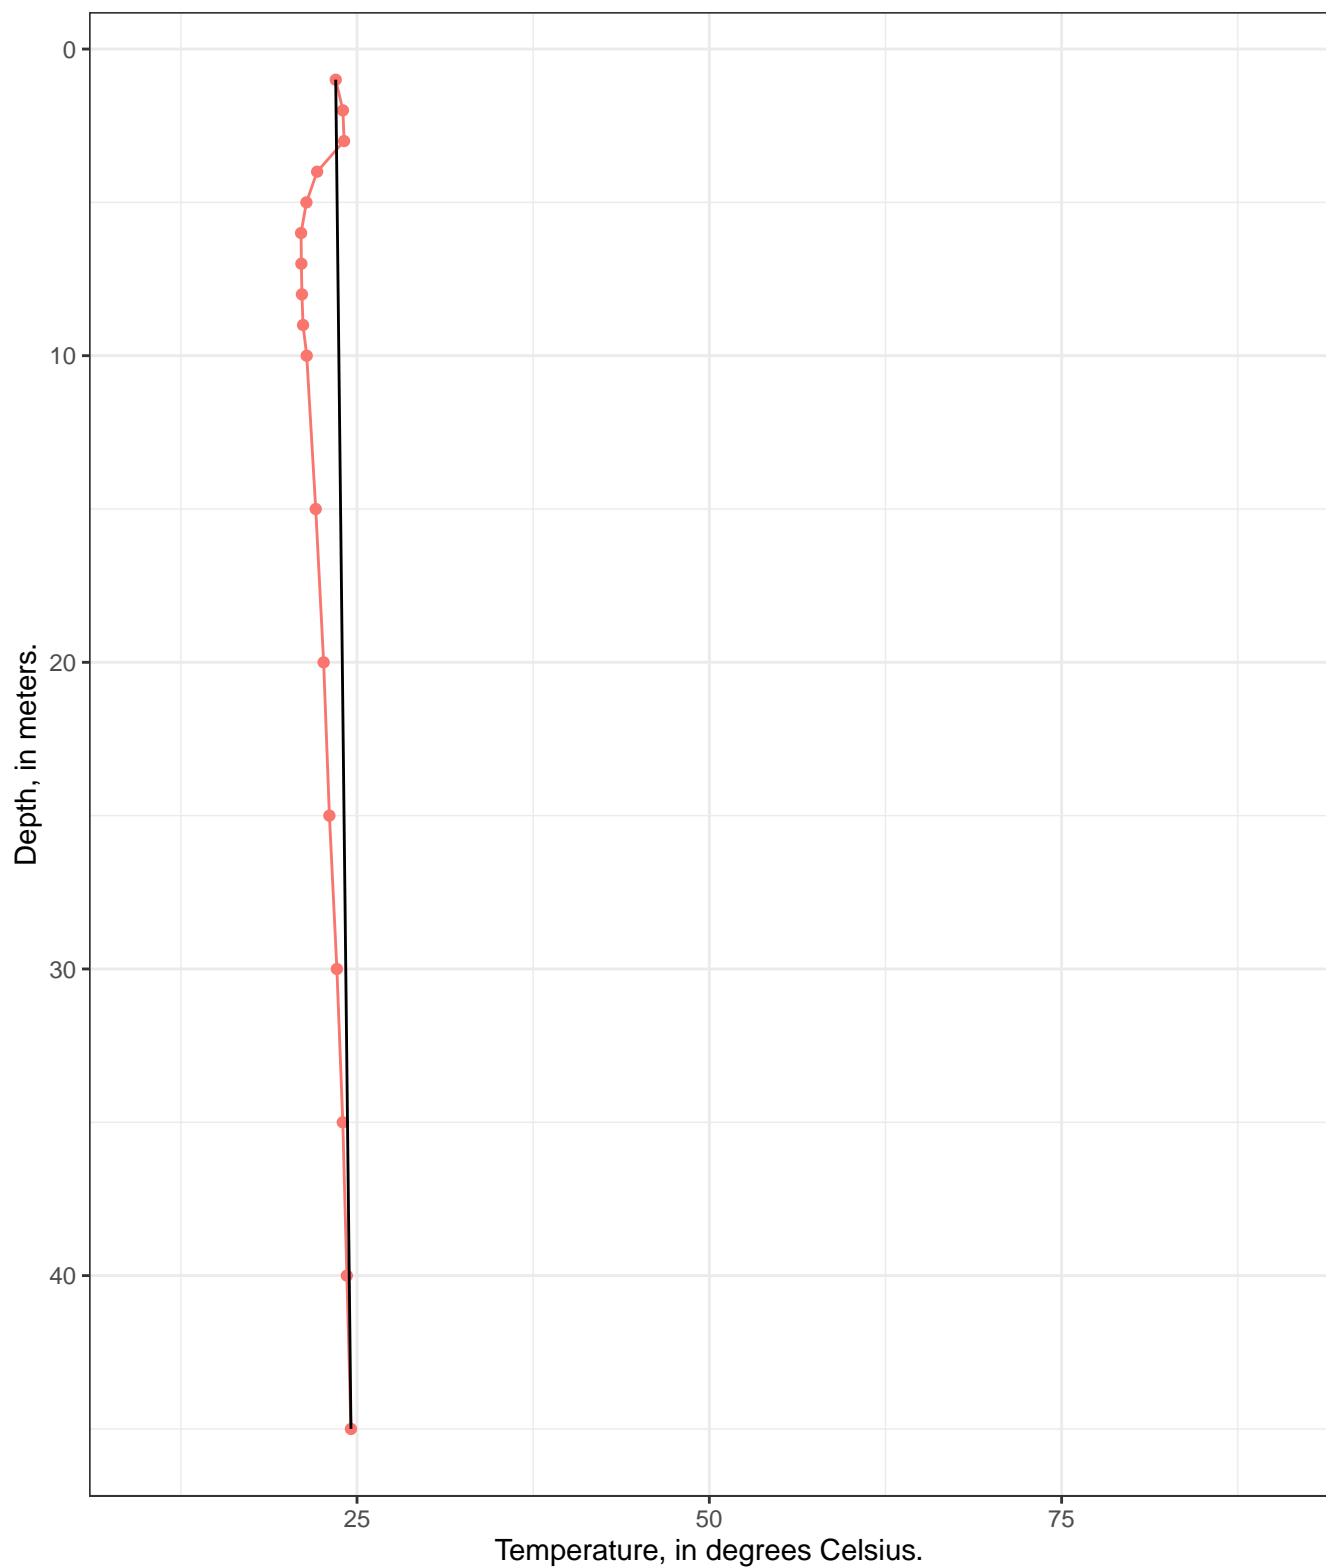

Measurement date 1982-10-07

ID: 339 [TG-88\_NMSUEI]

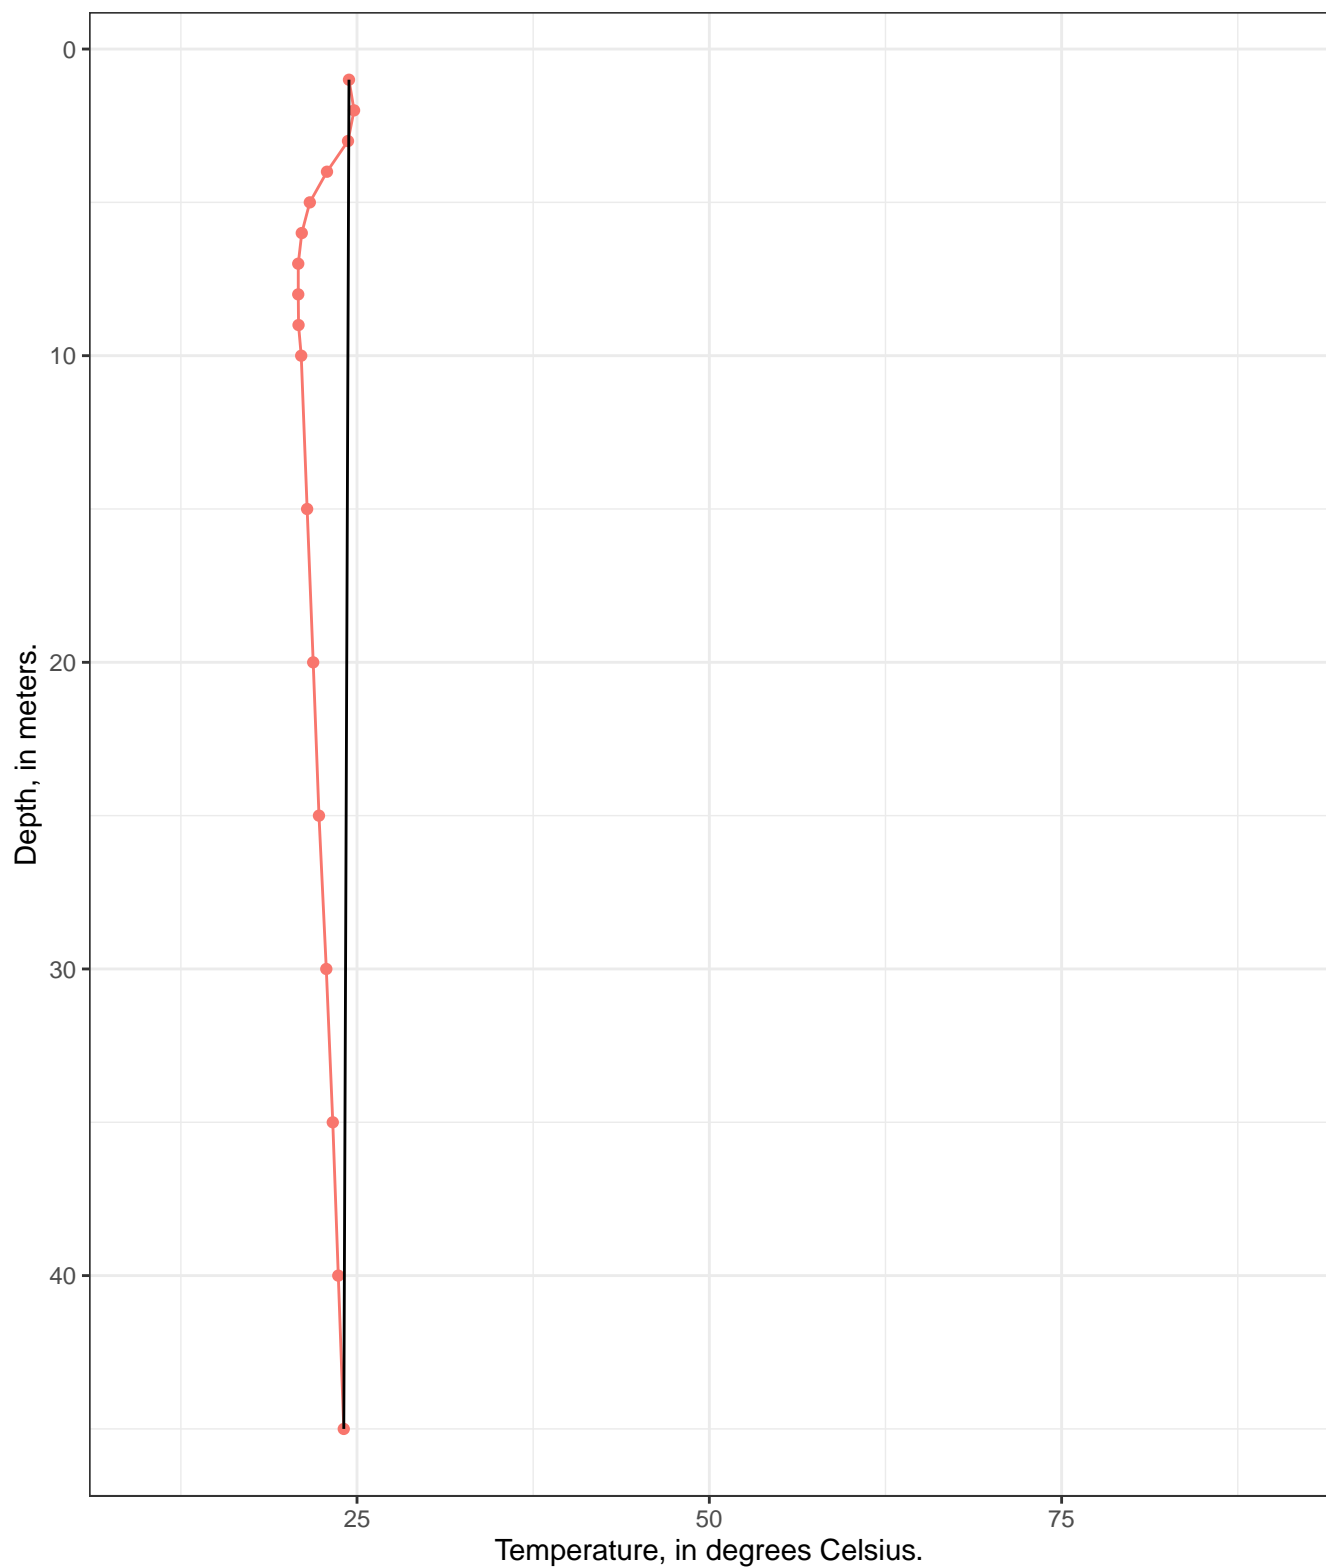

Measurement date 1982-10-07

ID: 340 [TG-89\_NMSUEI]

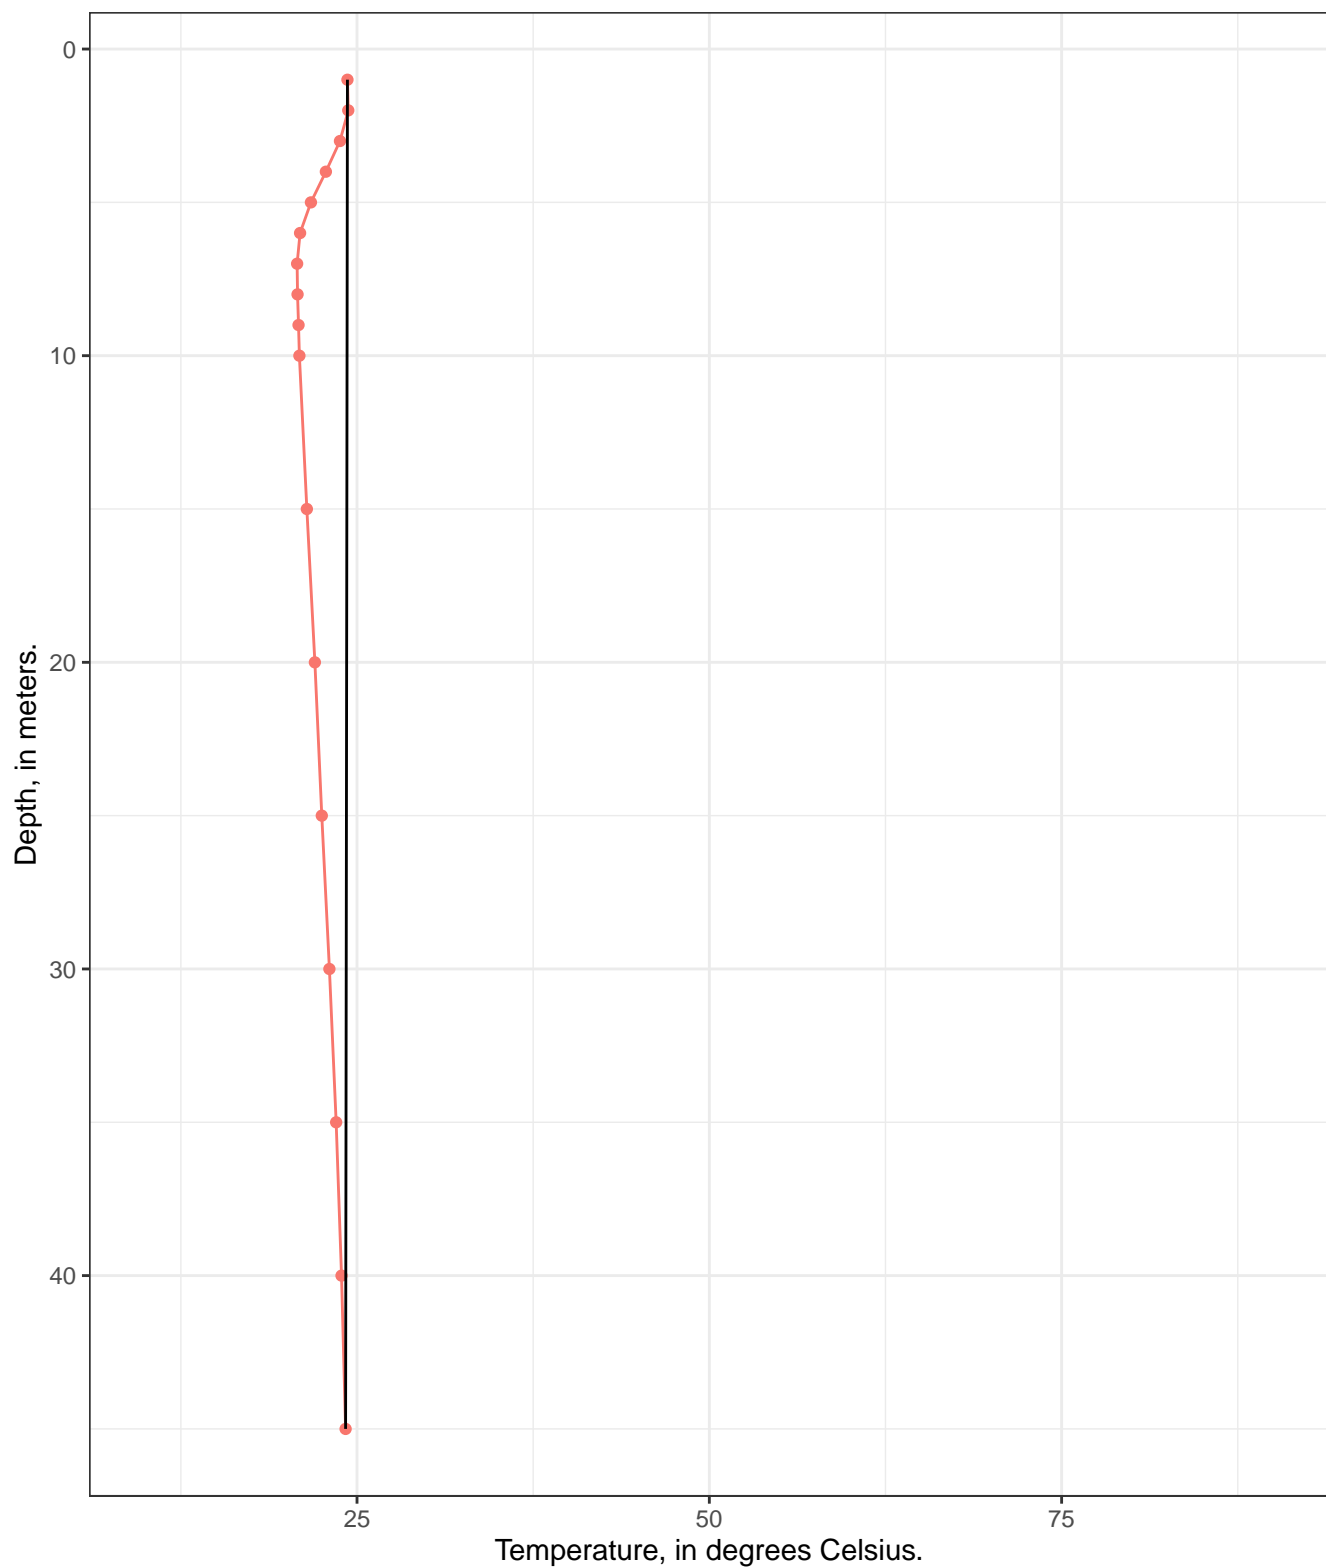

Measurement date 1982-10-07

ID: 341 [TG-90\_NMSUEI]

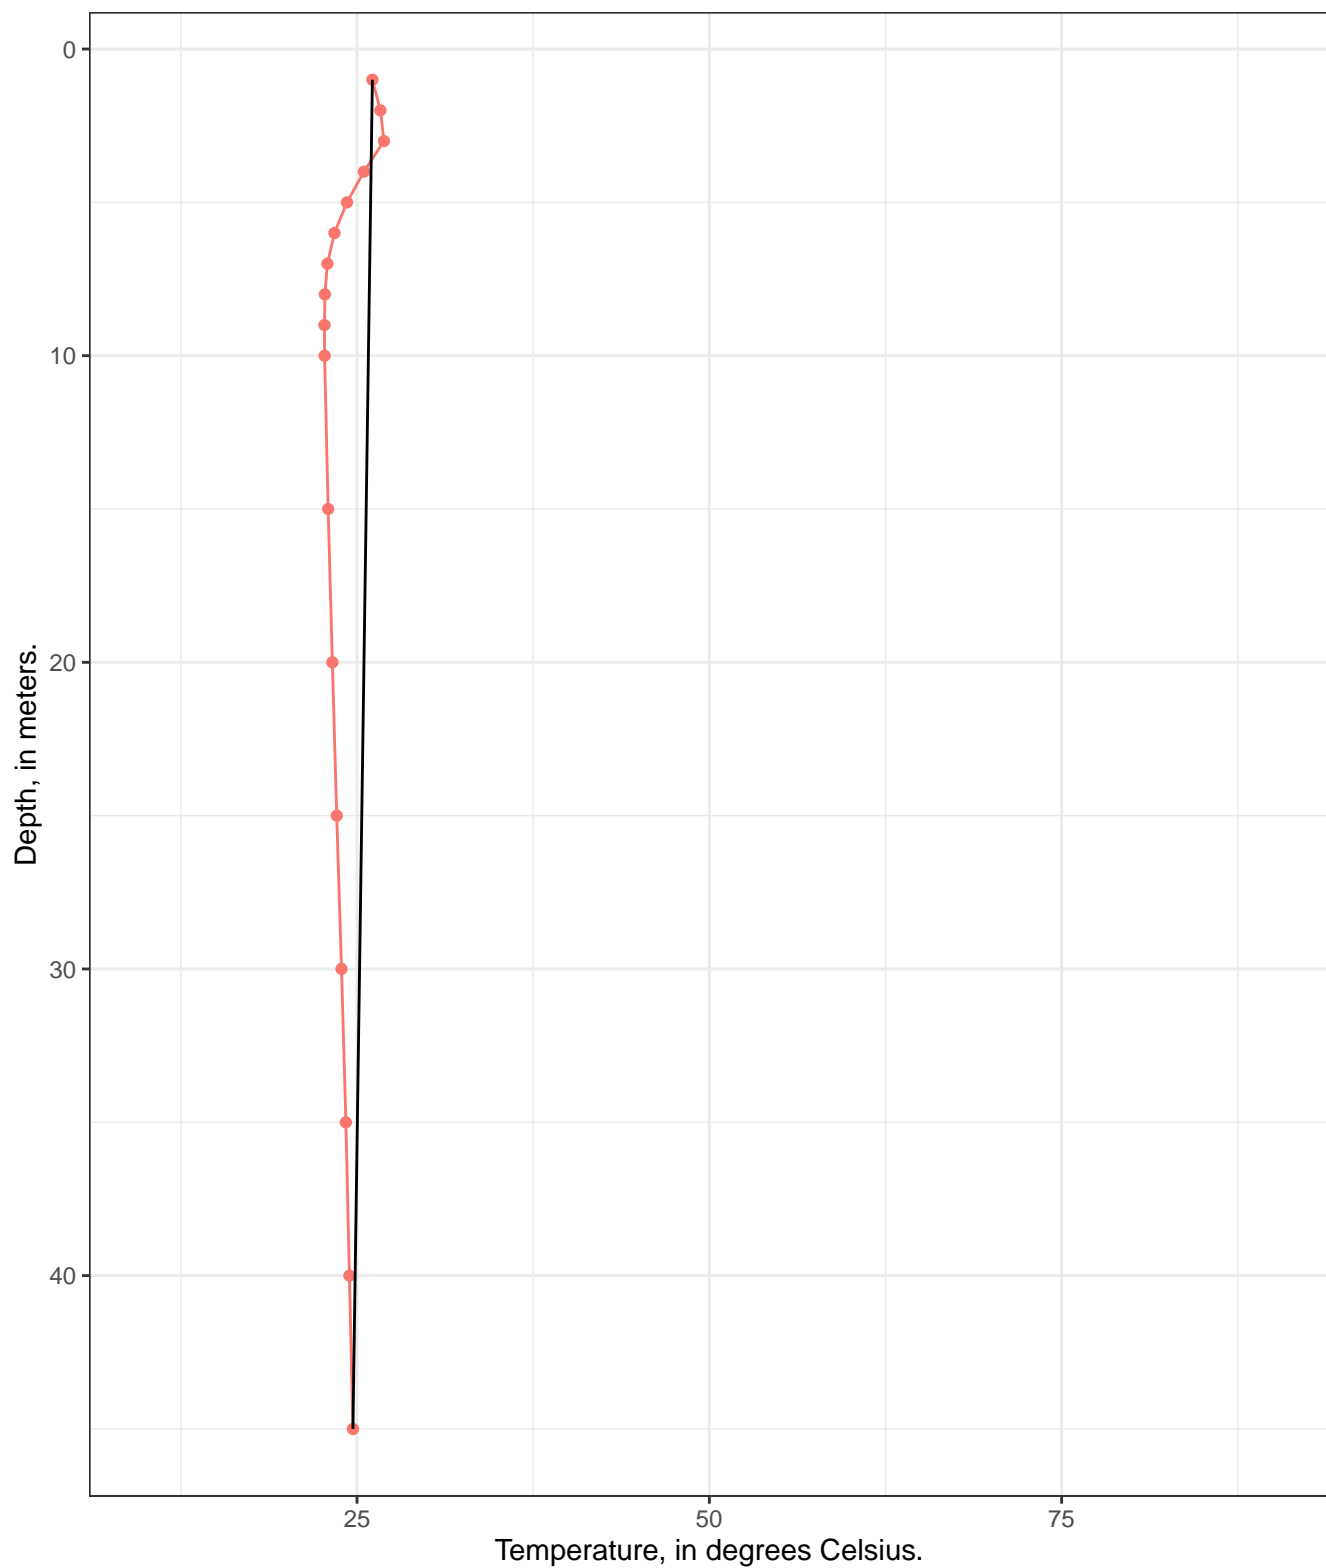

Measurement date 1982-10-07

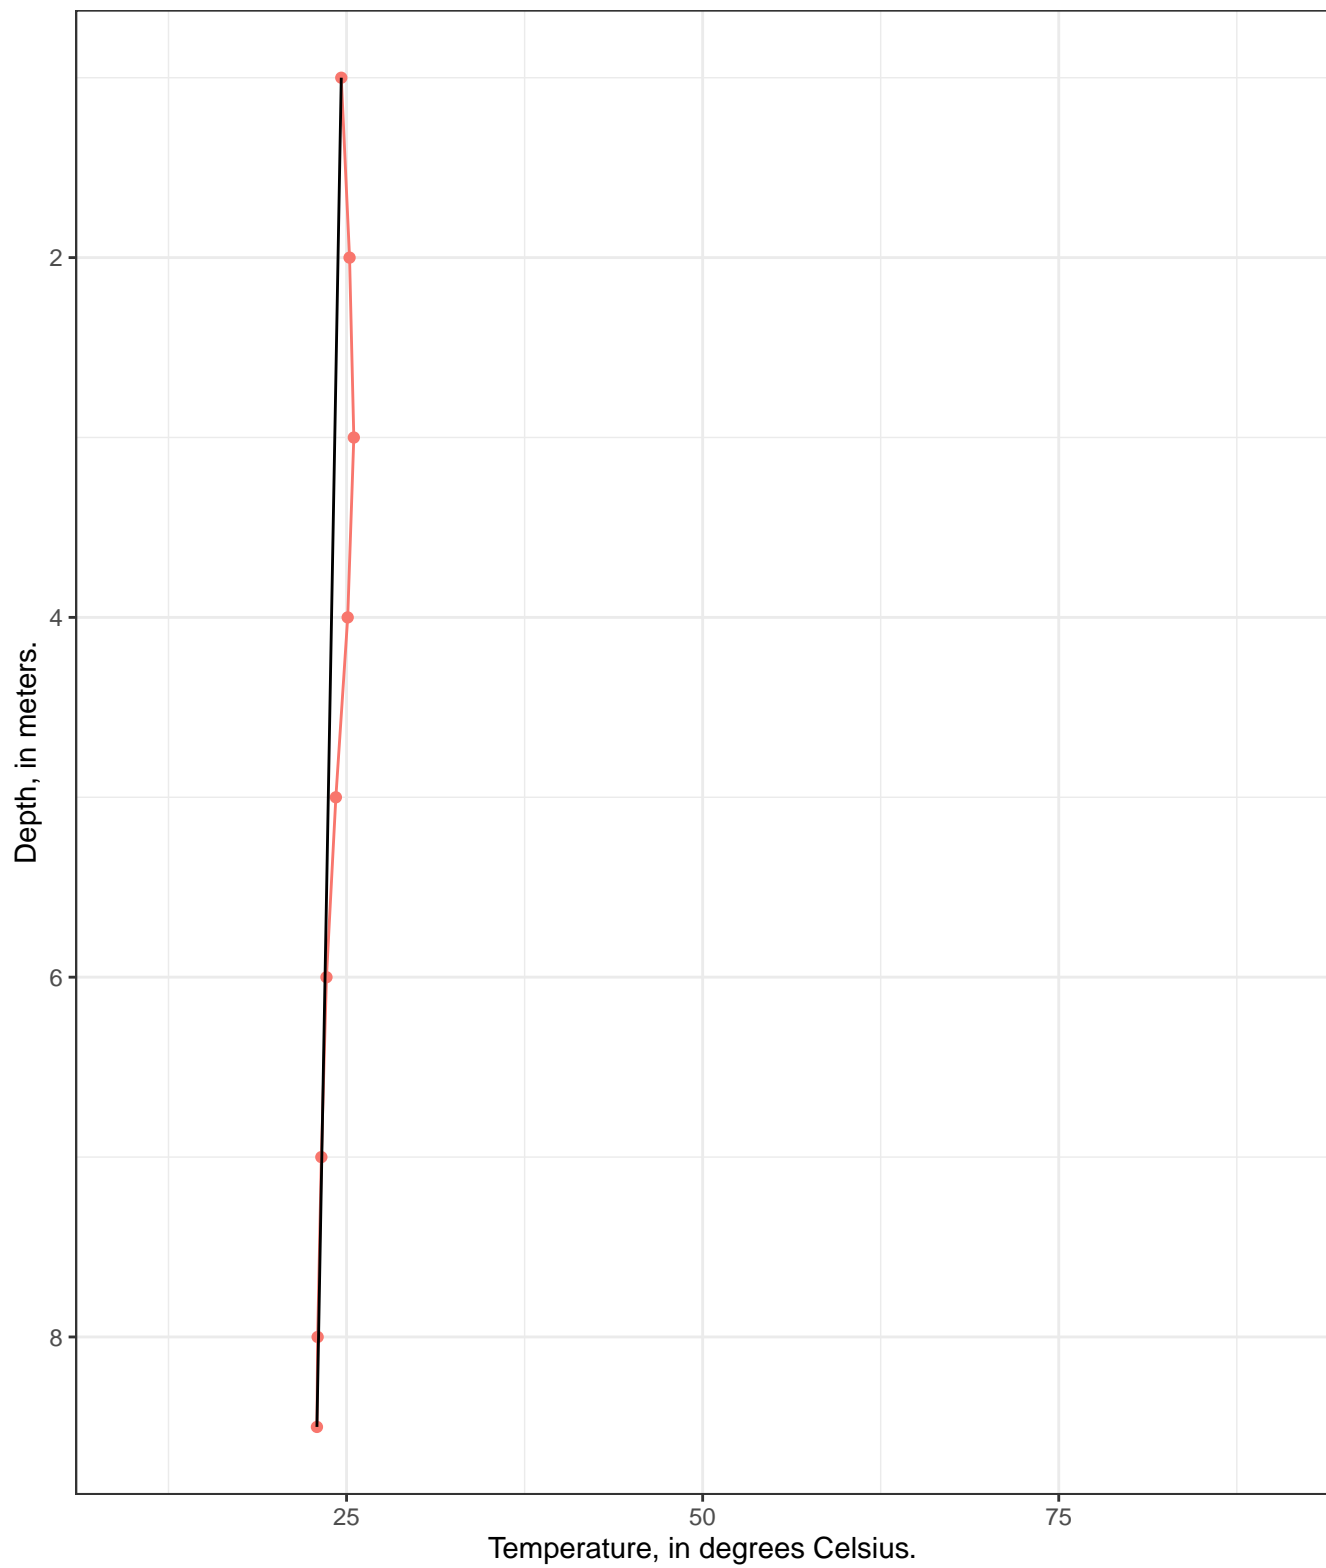

ID: 343 [TG-92\_NMSUEI]

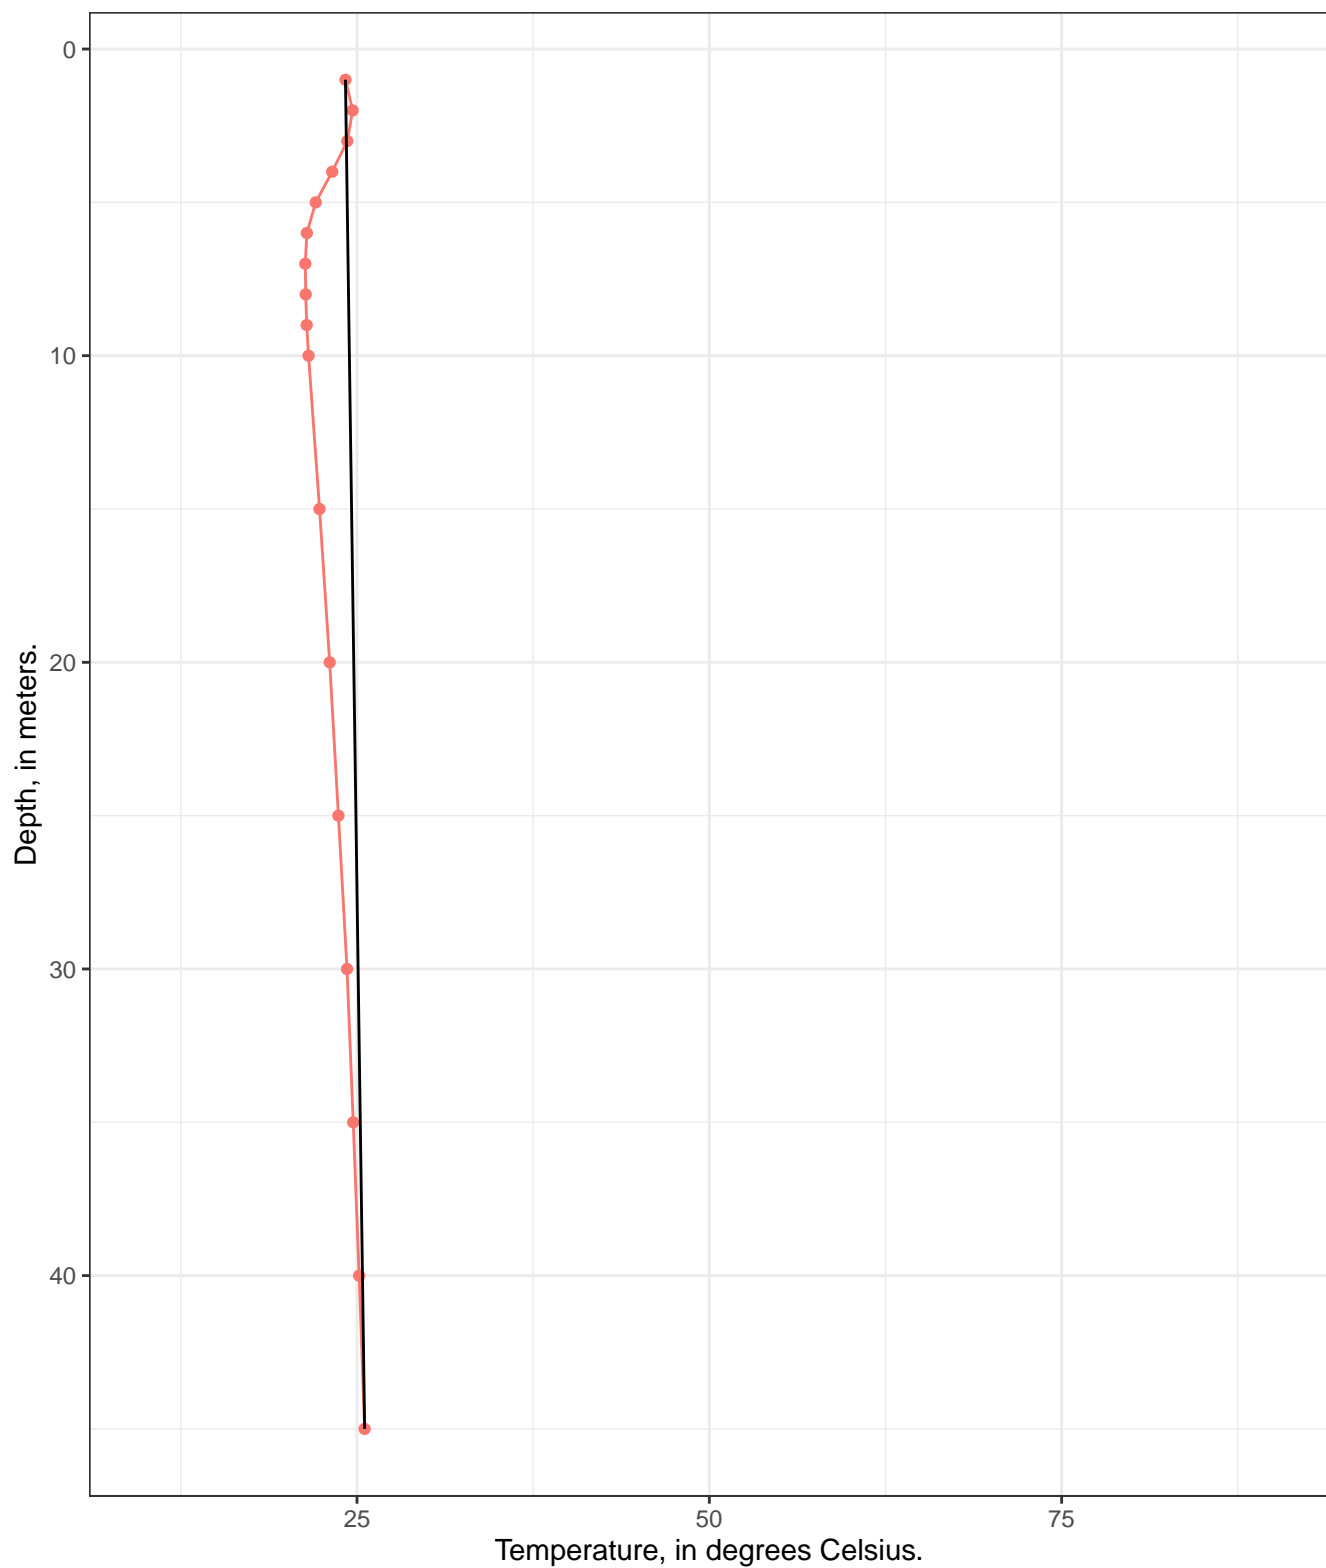



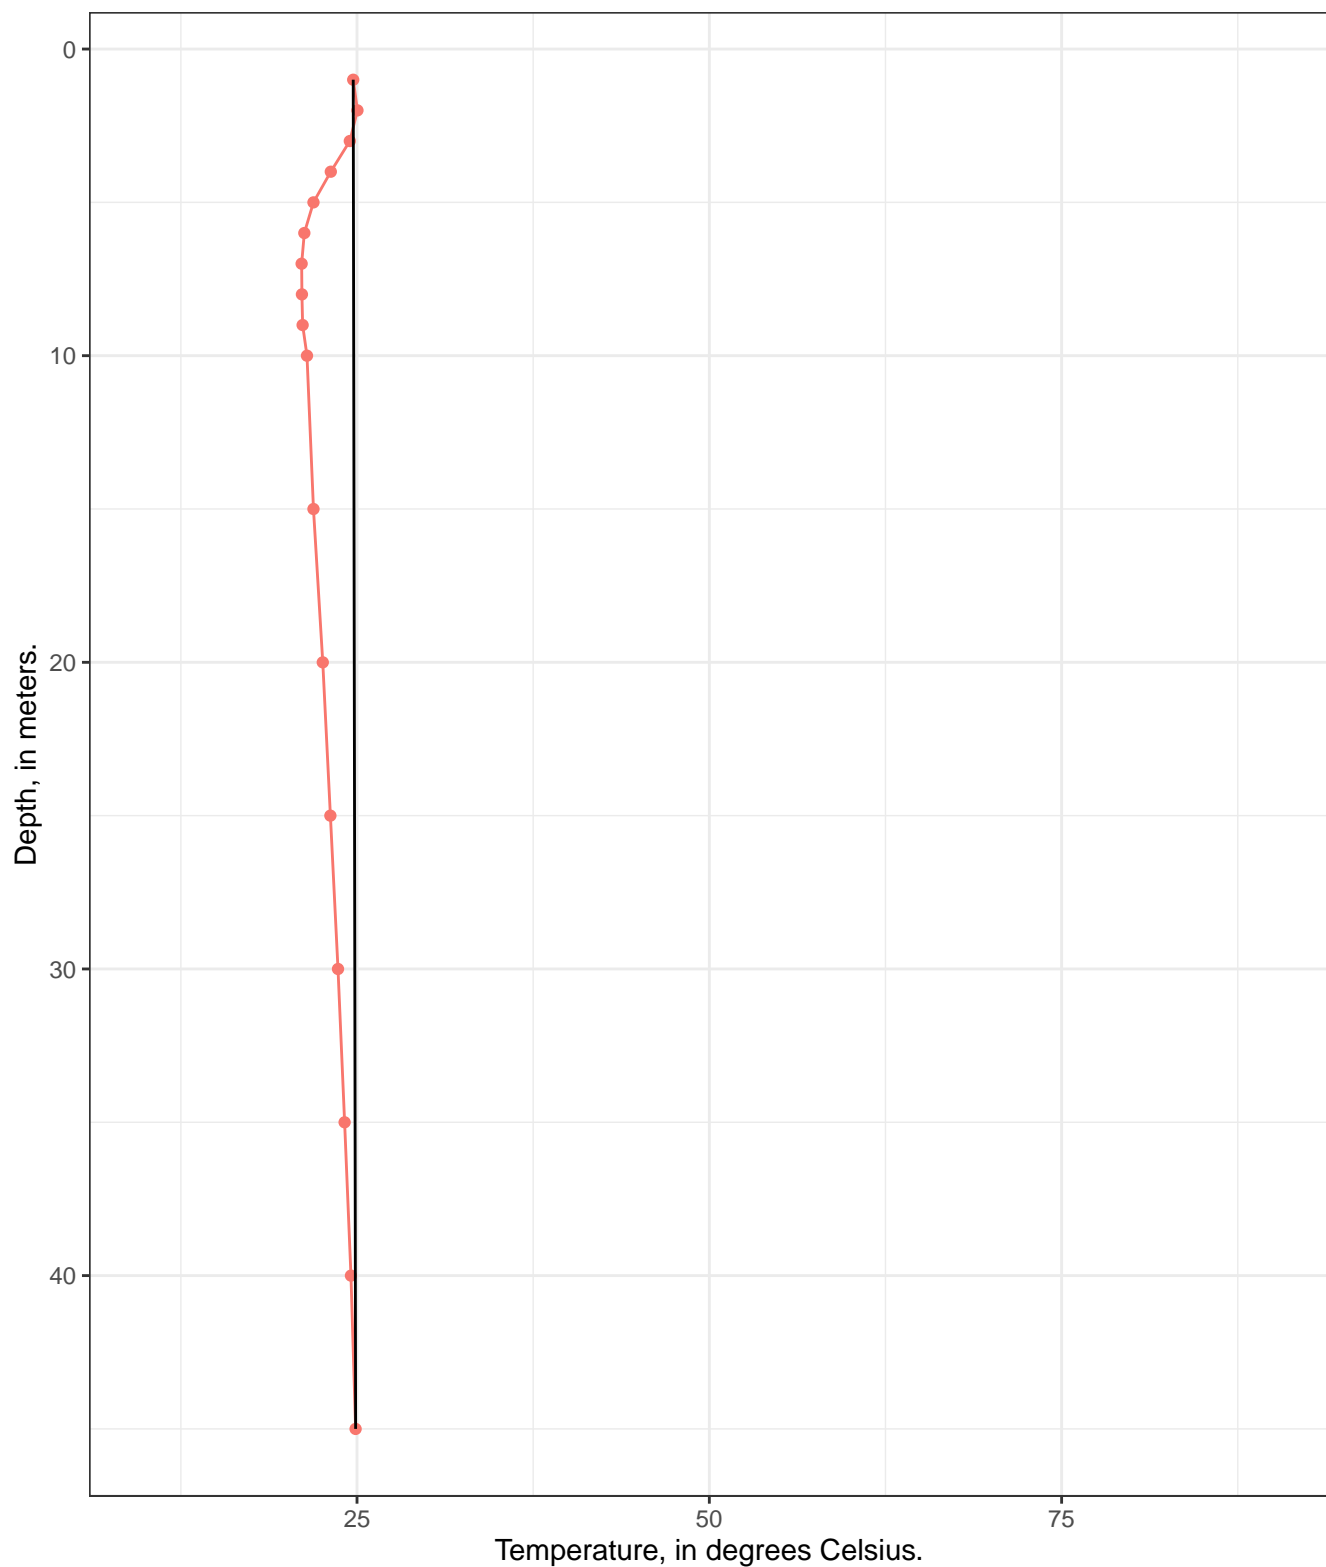

ID: 345 [TG-94\_NMSUEI]

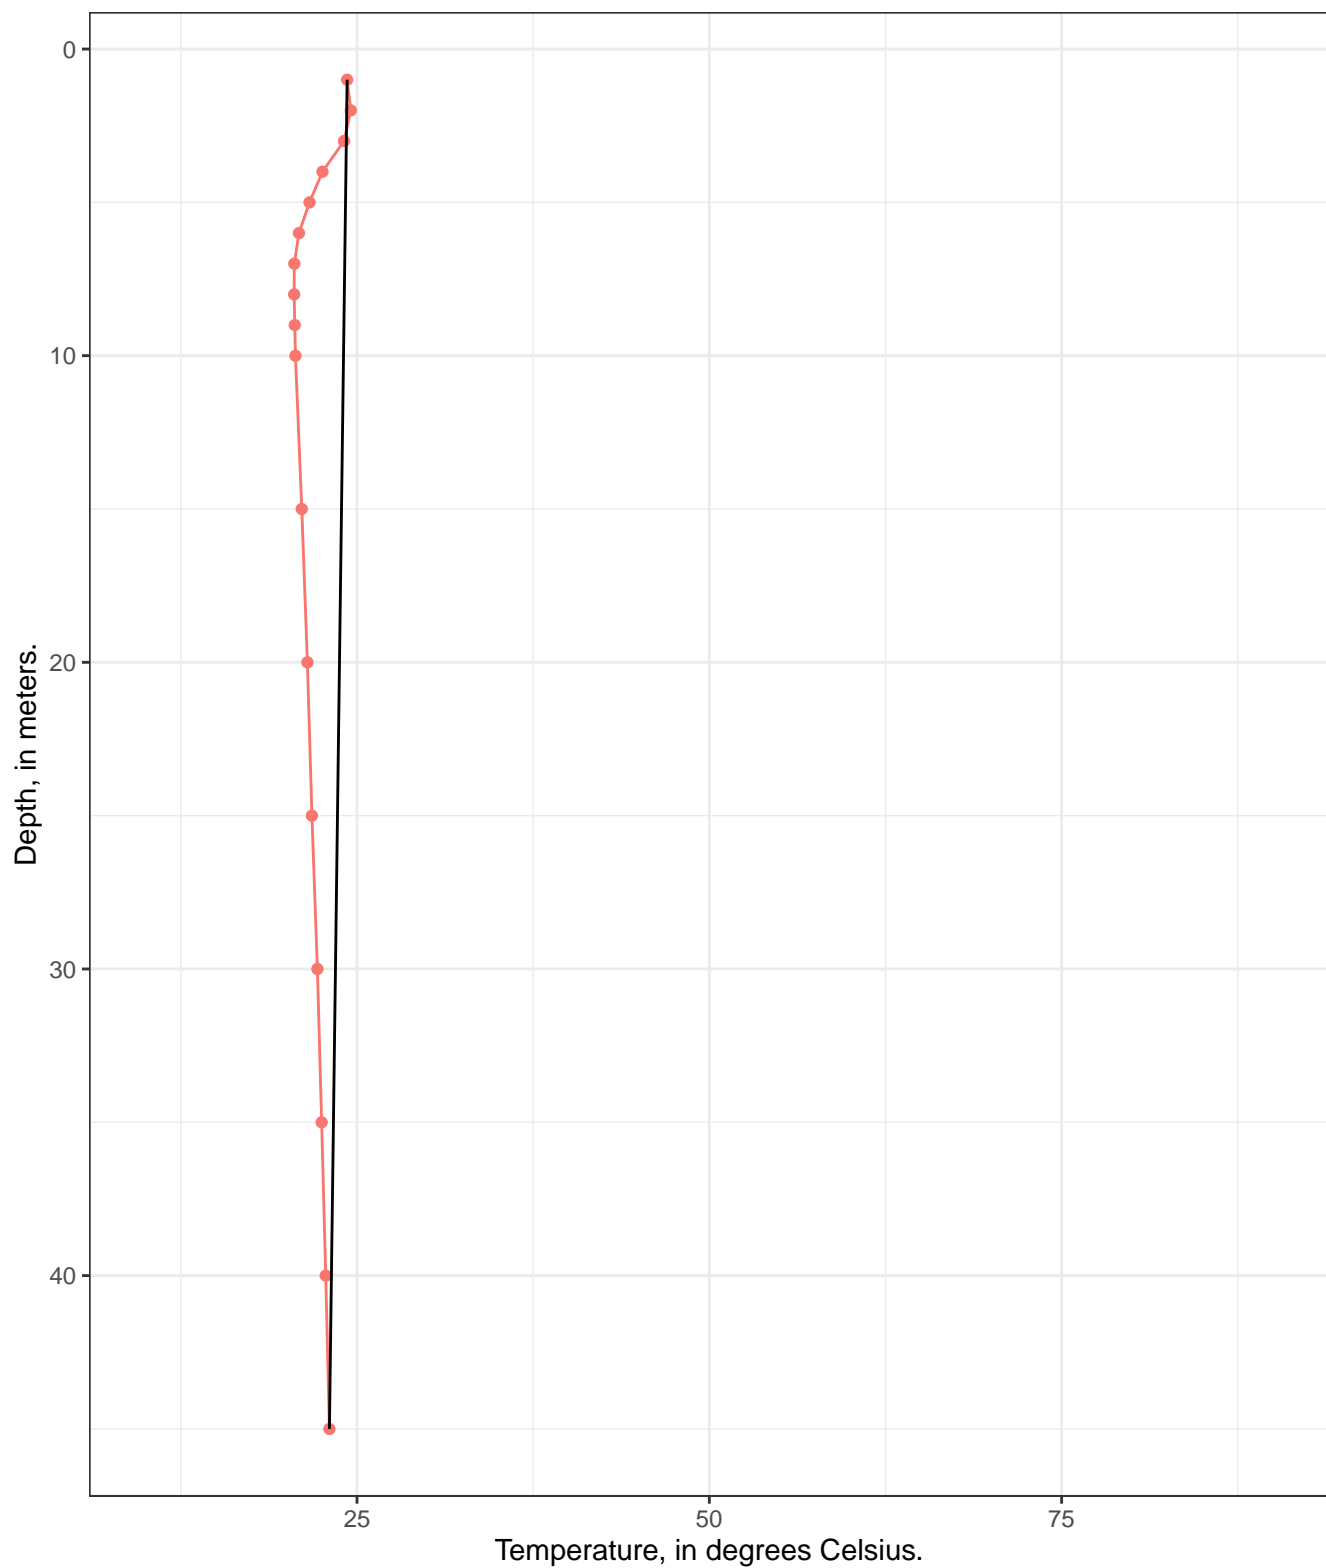

Measurement date 1982-10-07

ID: 346 [TG-95\_NMSUEI]

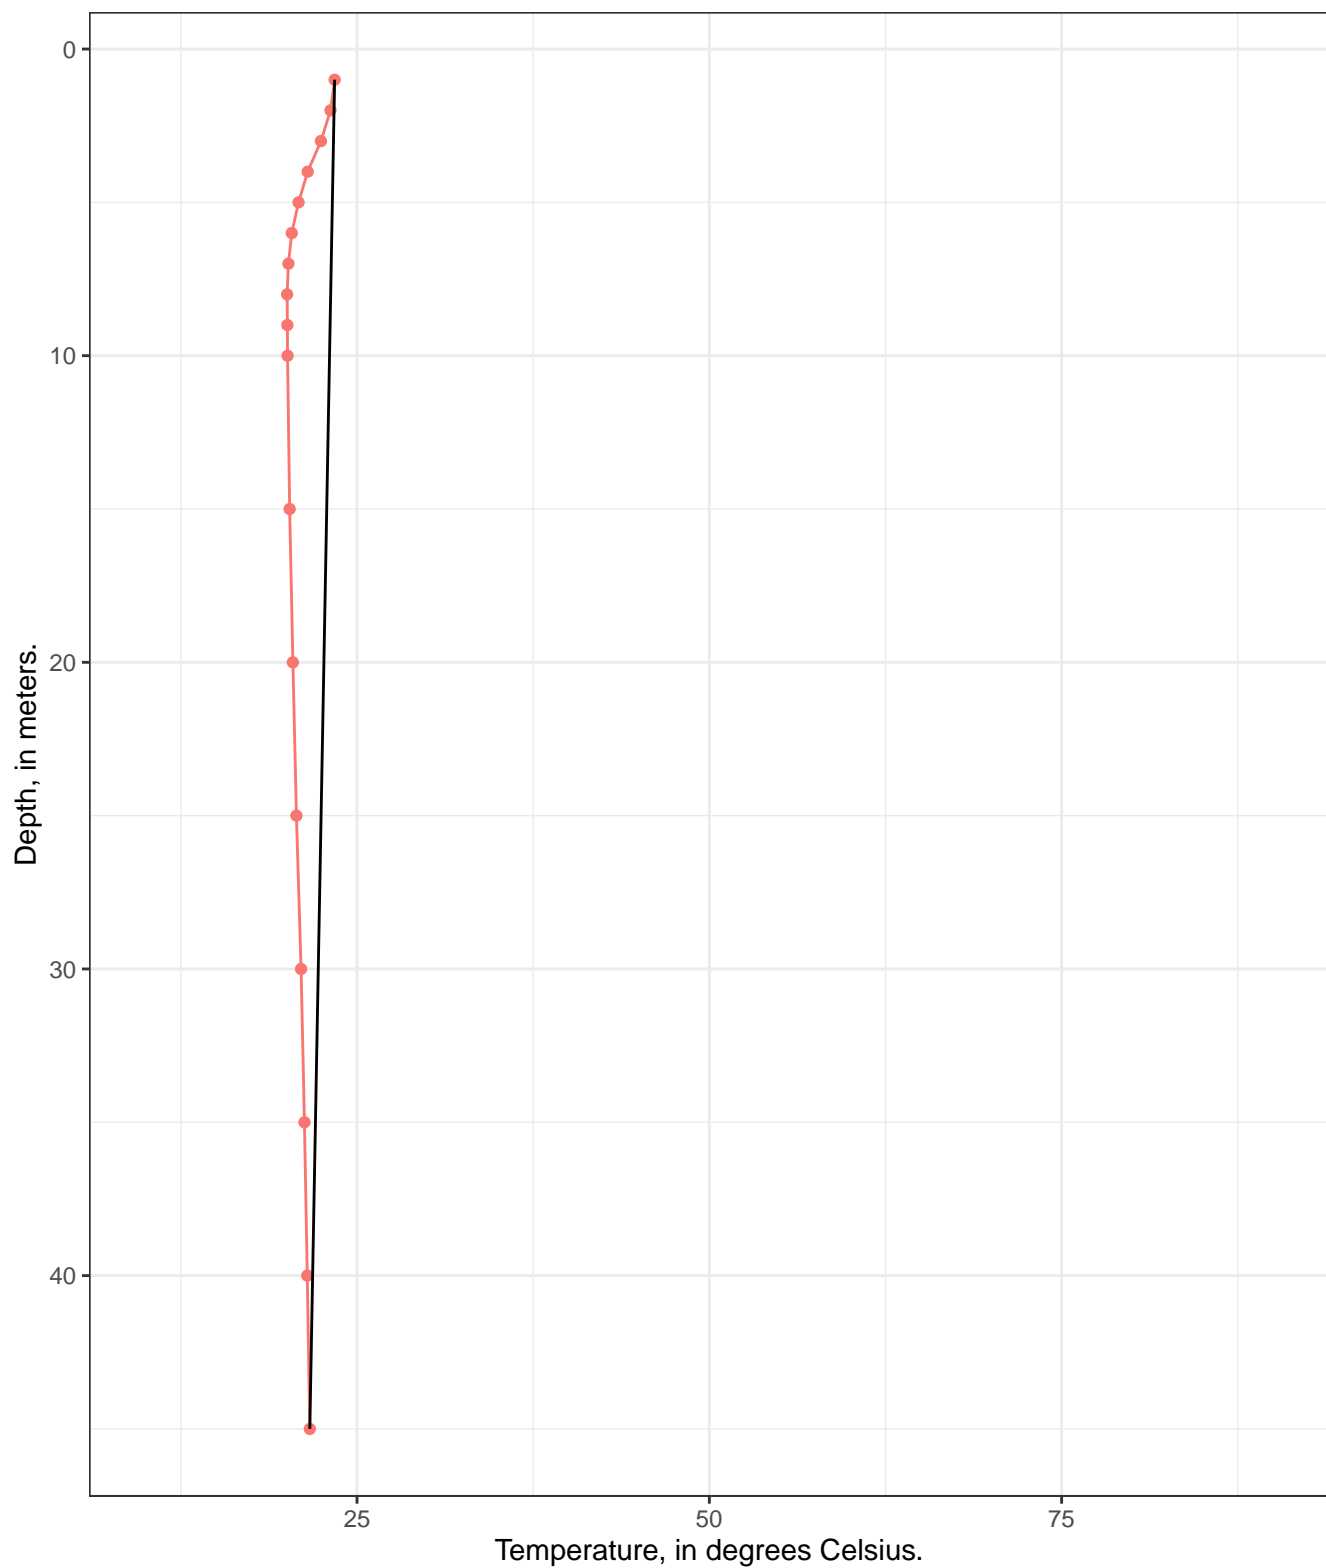

Measurement date 1982-10-07

ID: 347 [TG-96\_NMSUEI]

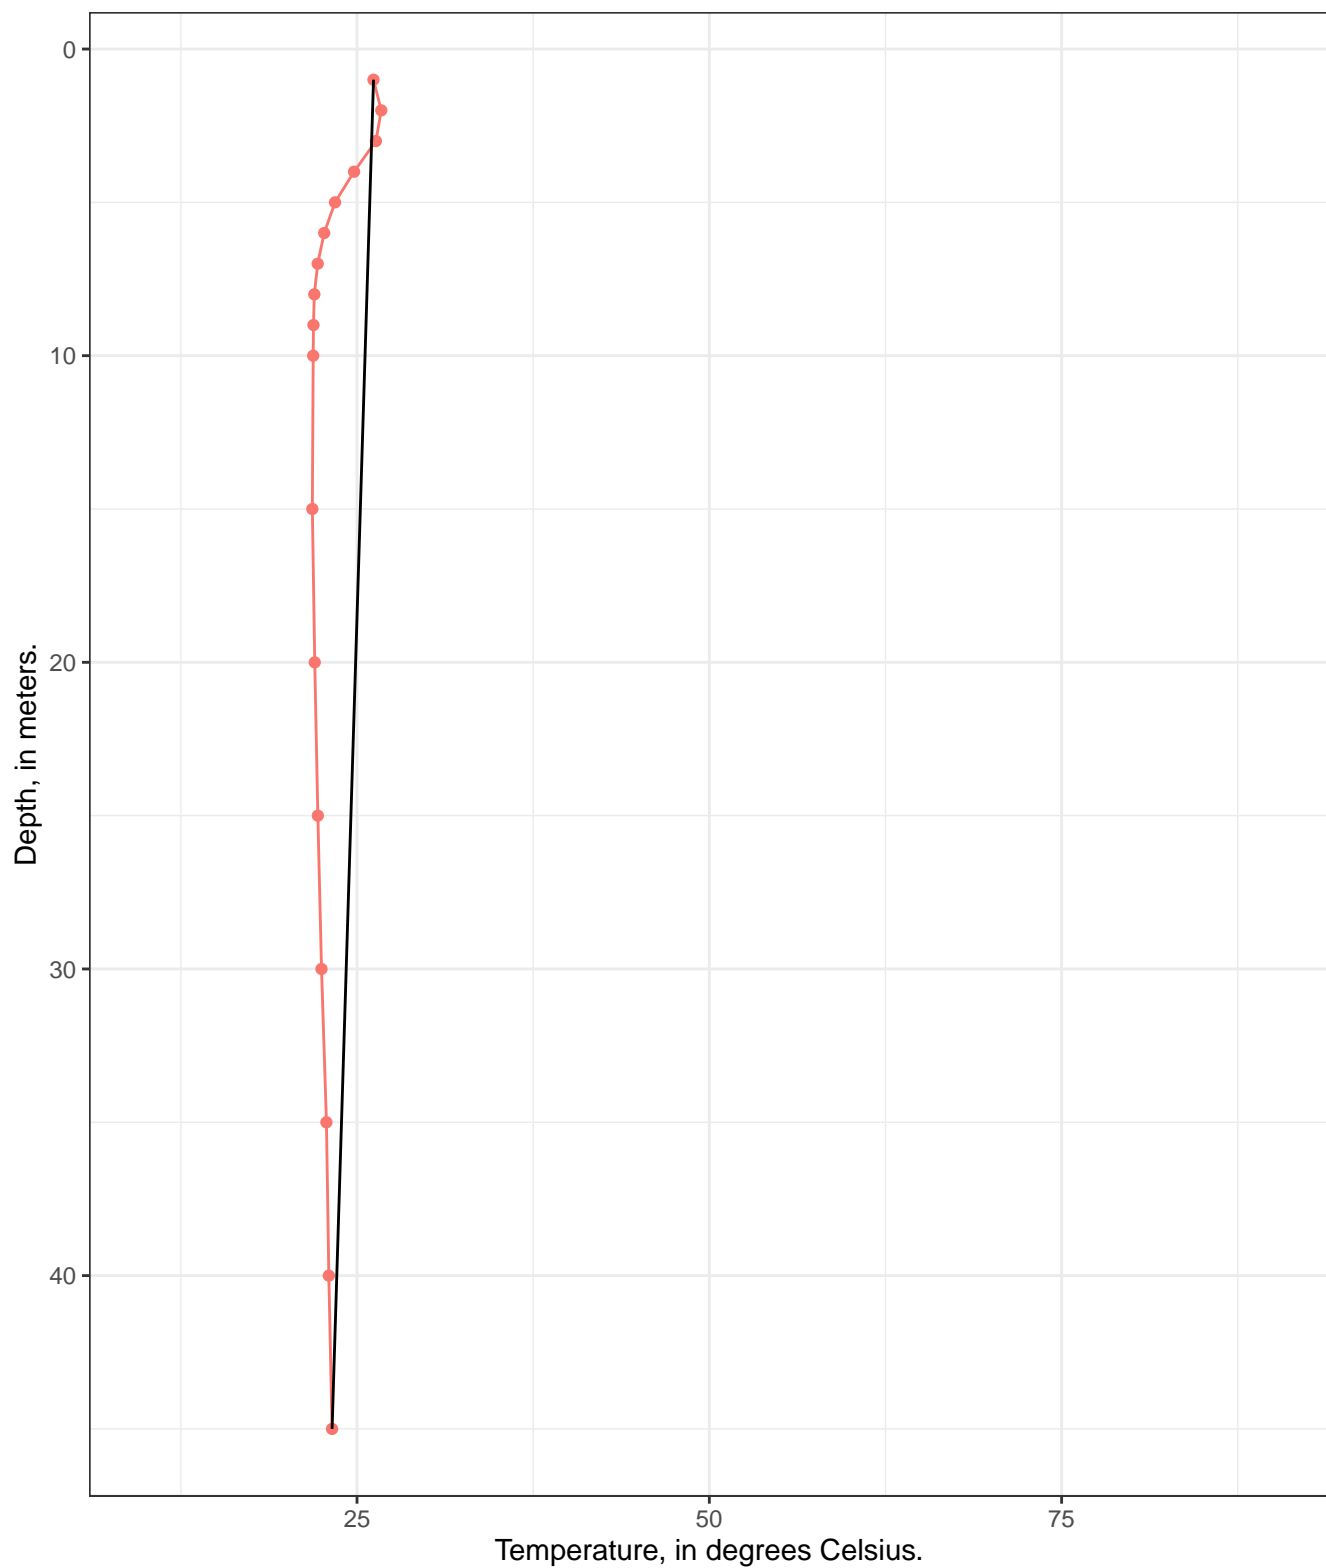

ID: 348 [TG-97\_NMSUEI]

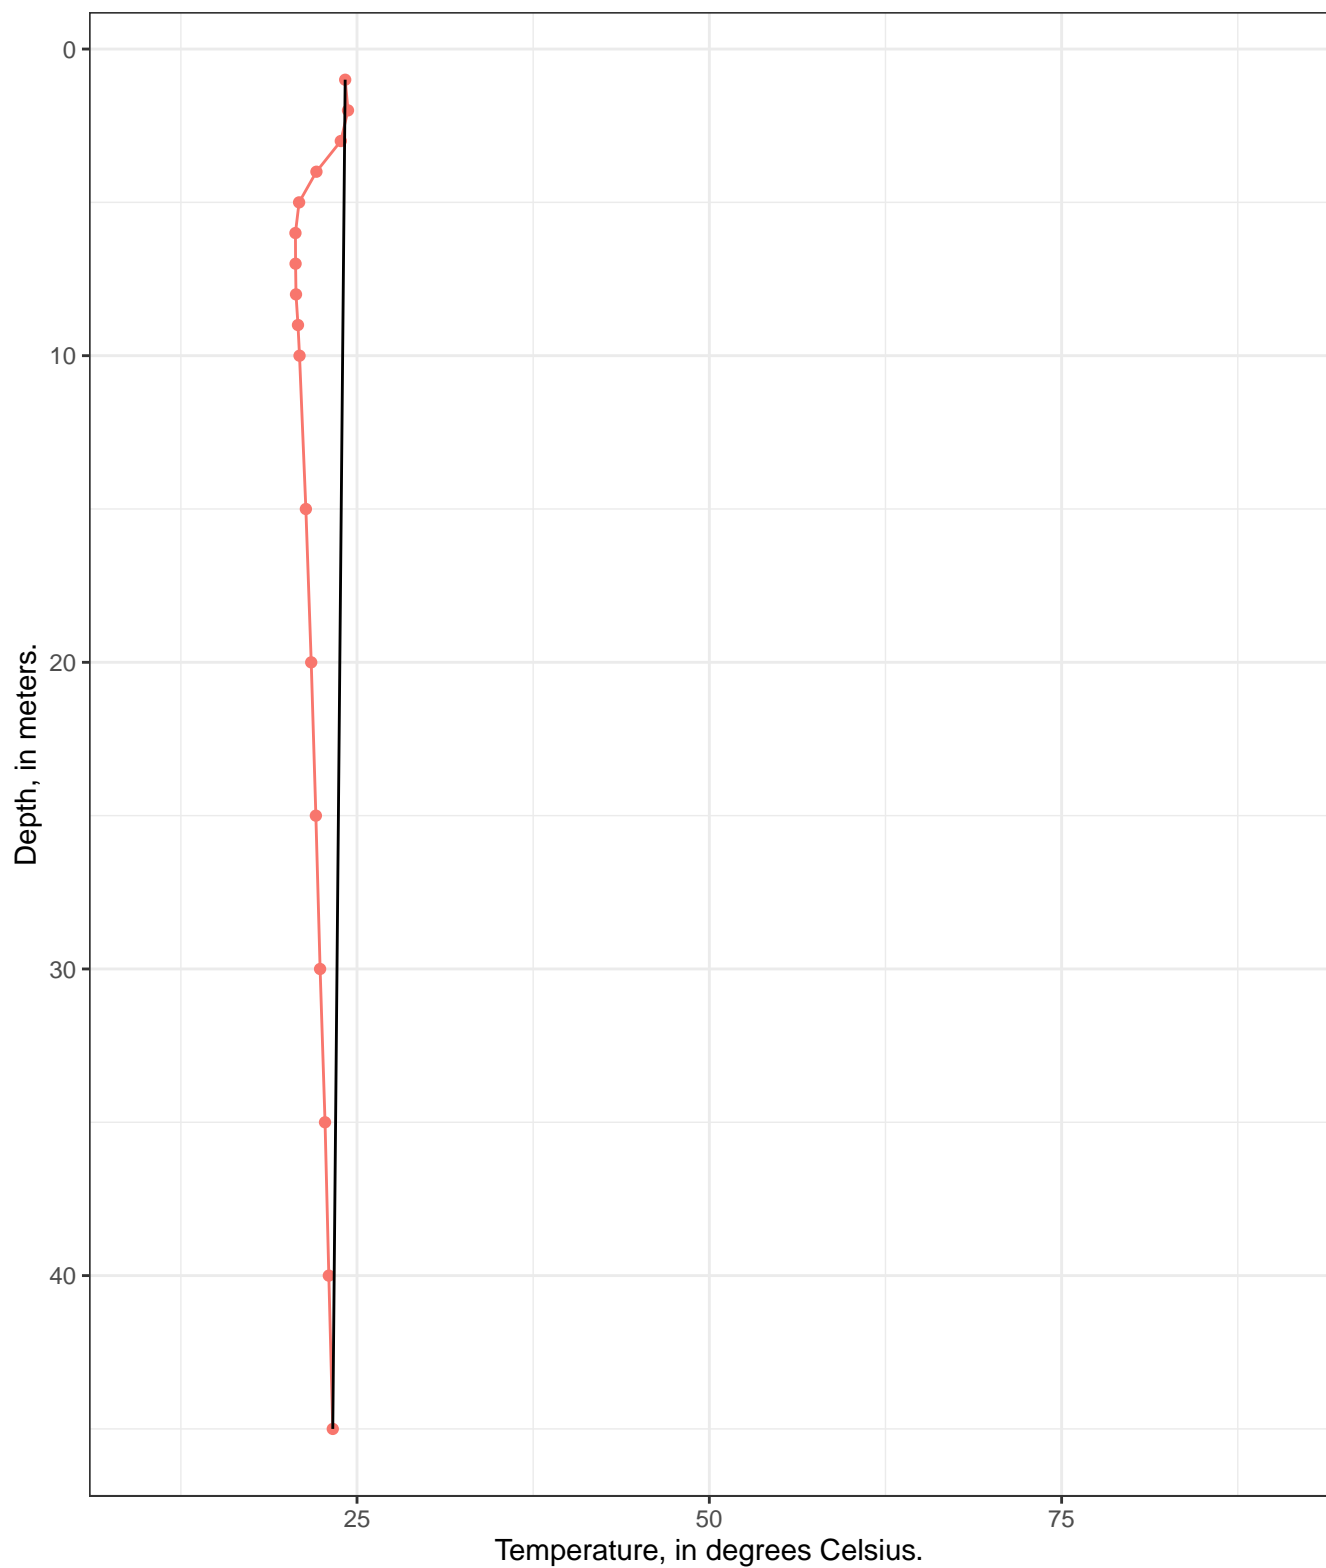

Measurement date 1982-10-07

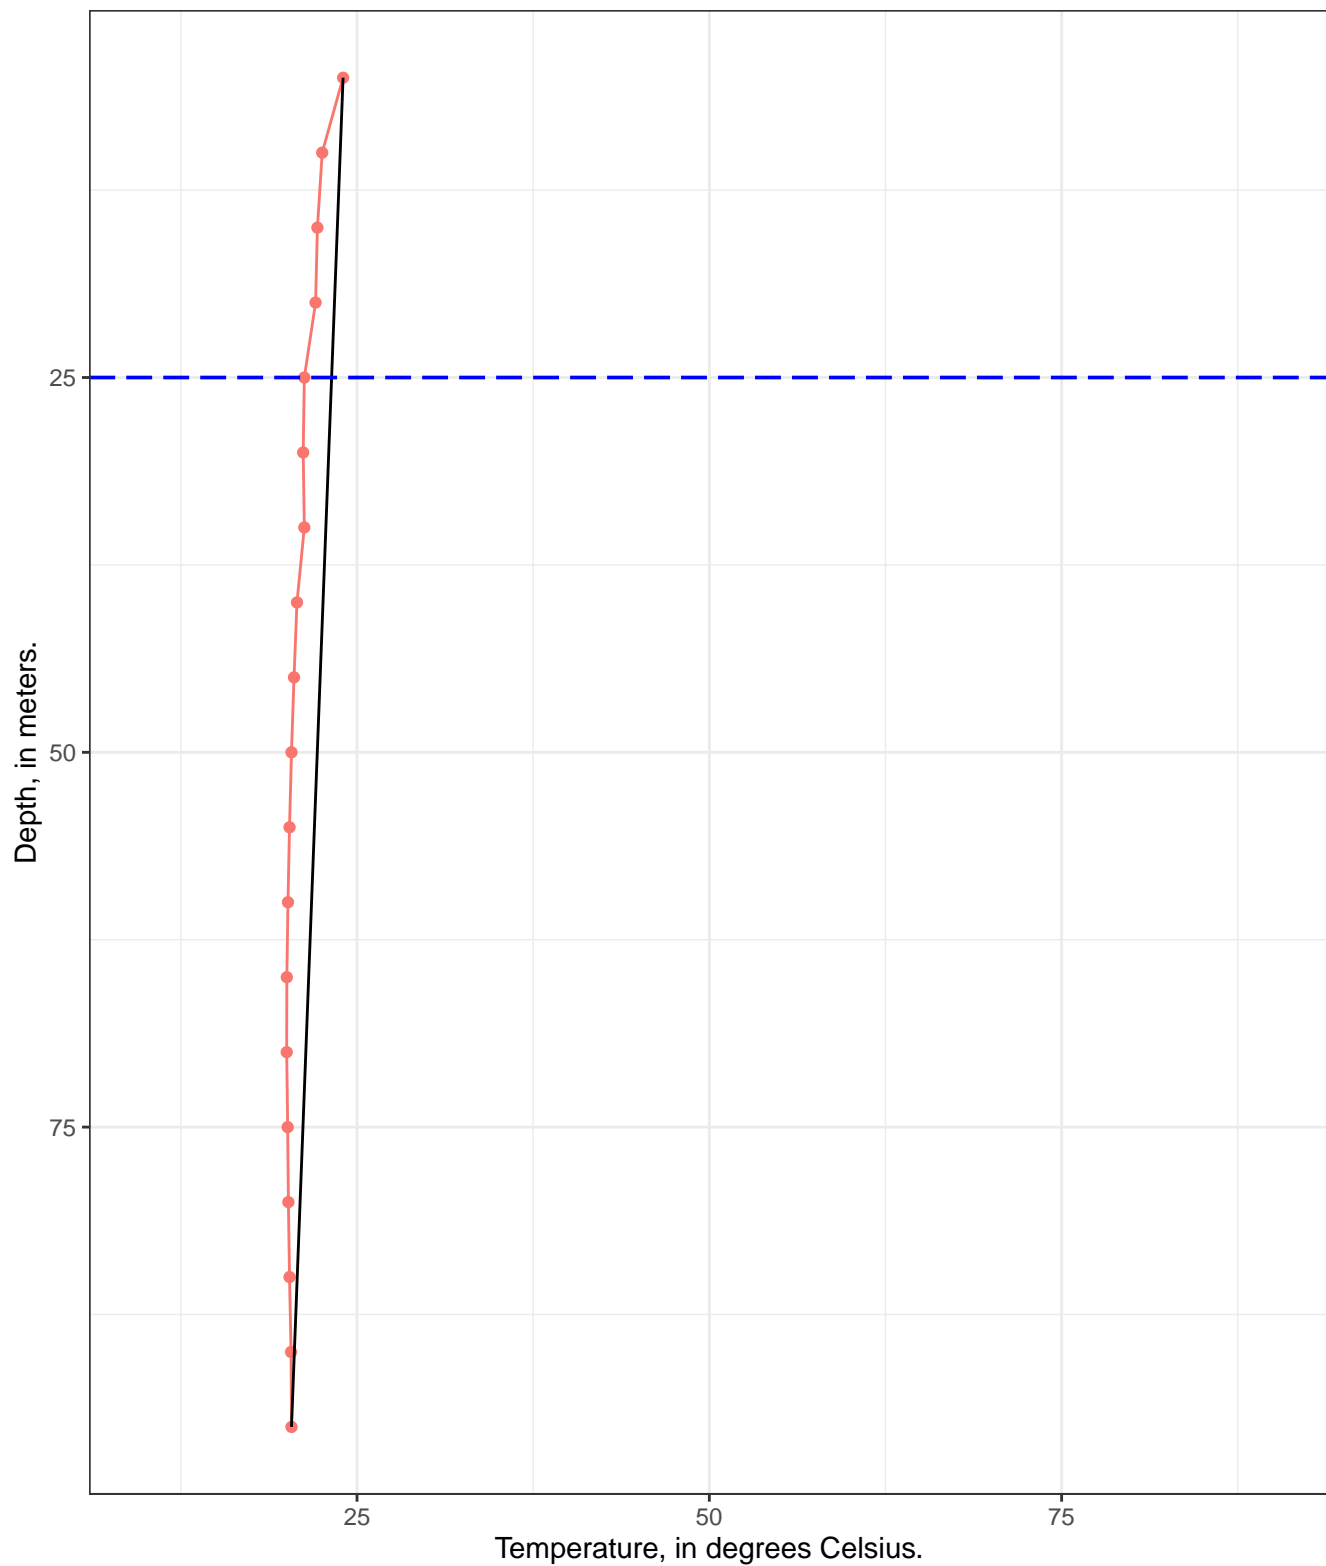

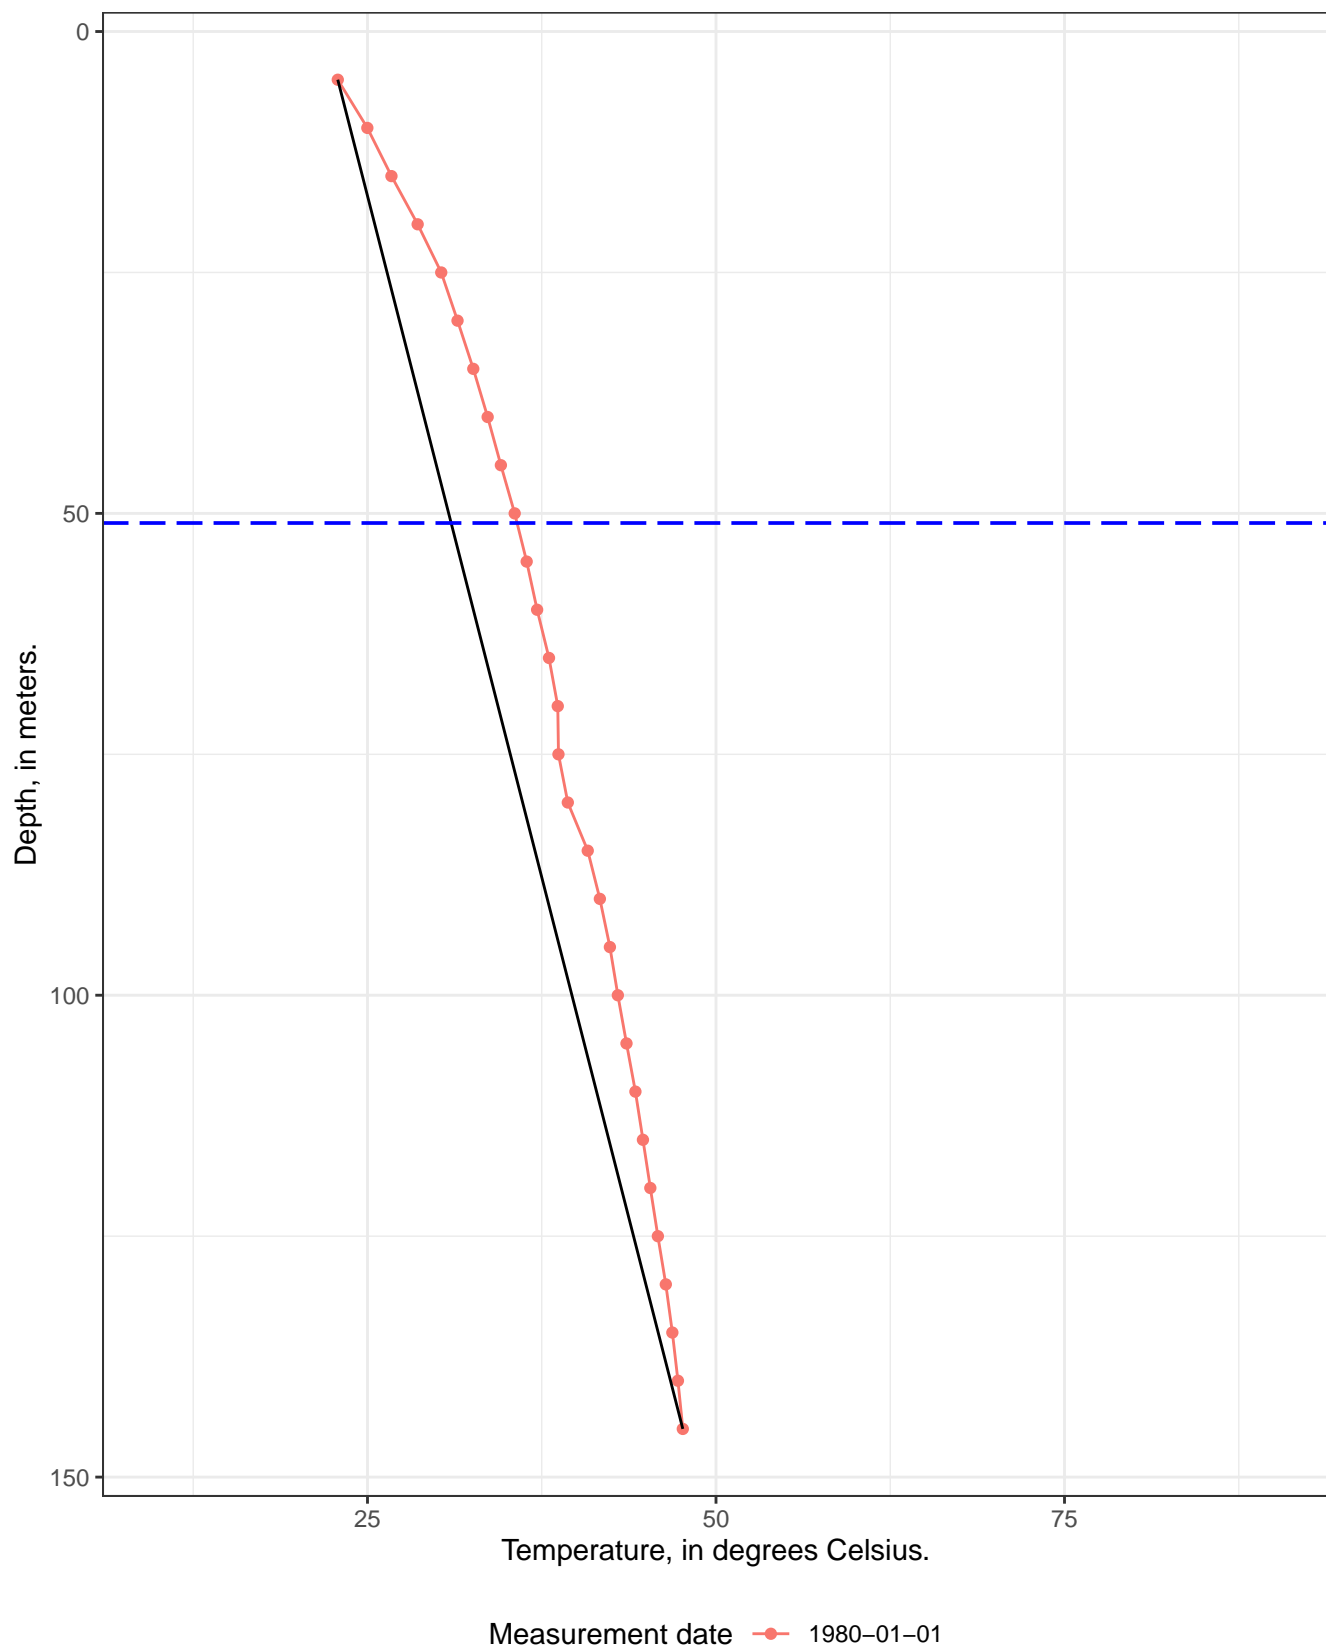

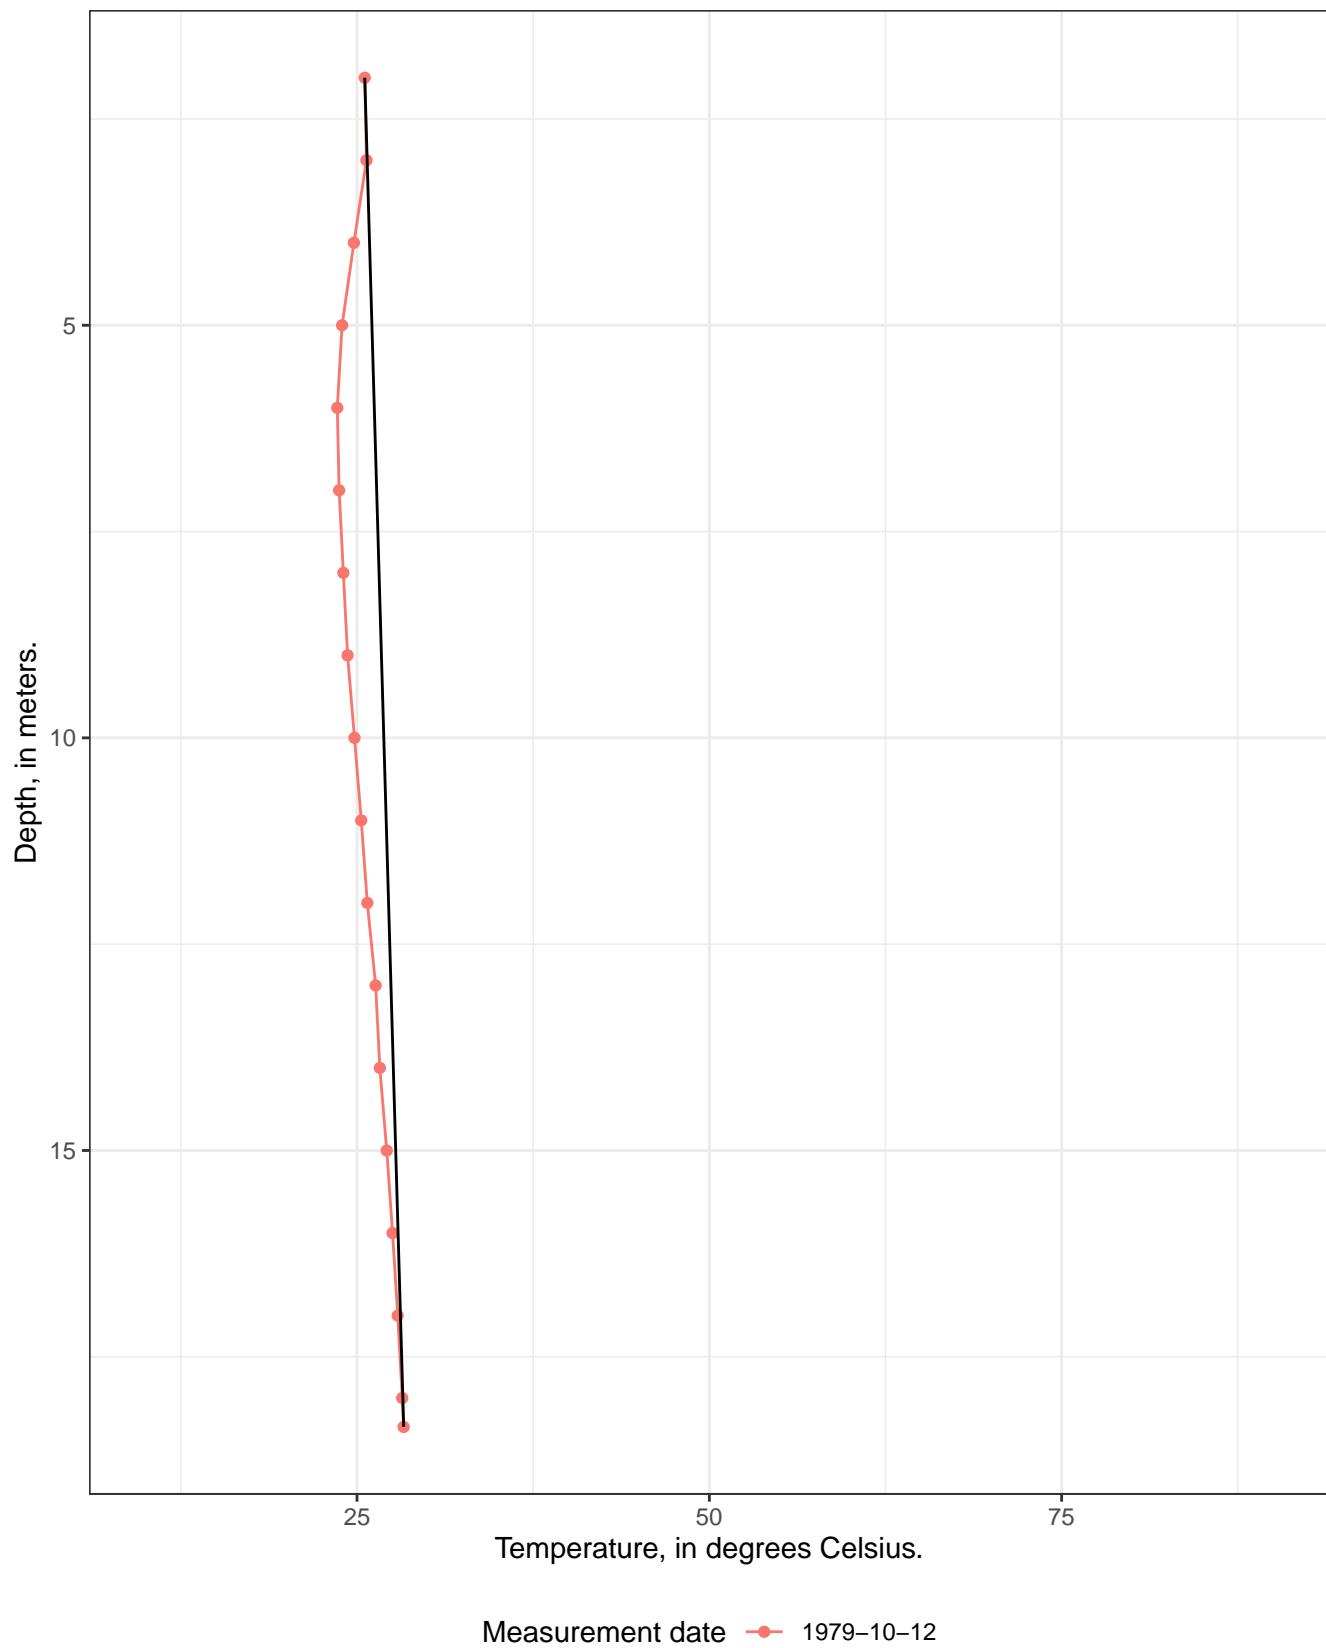



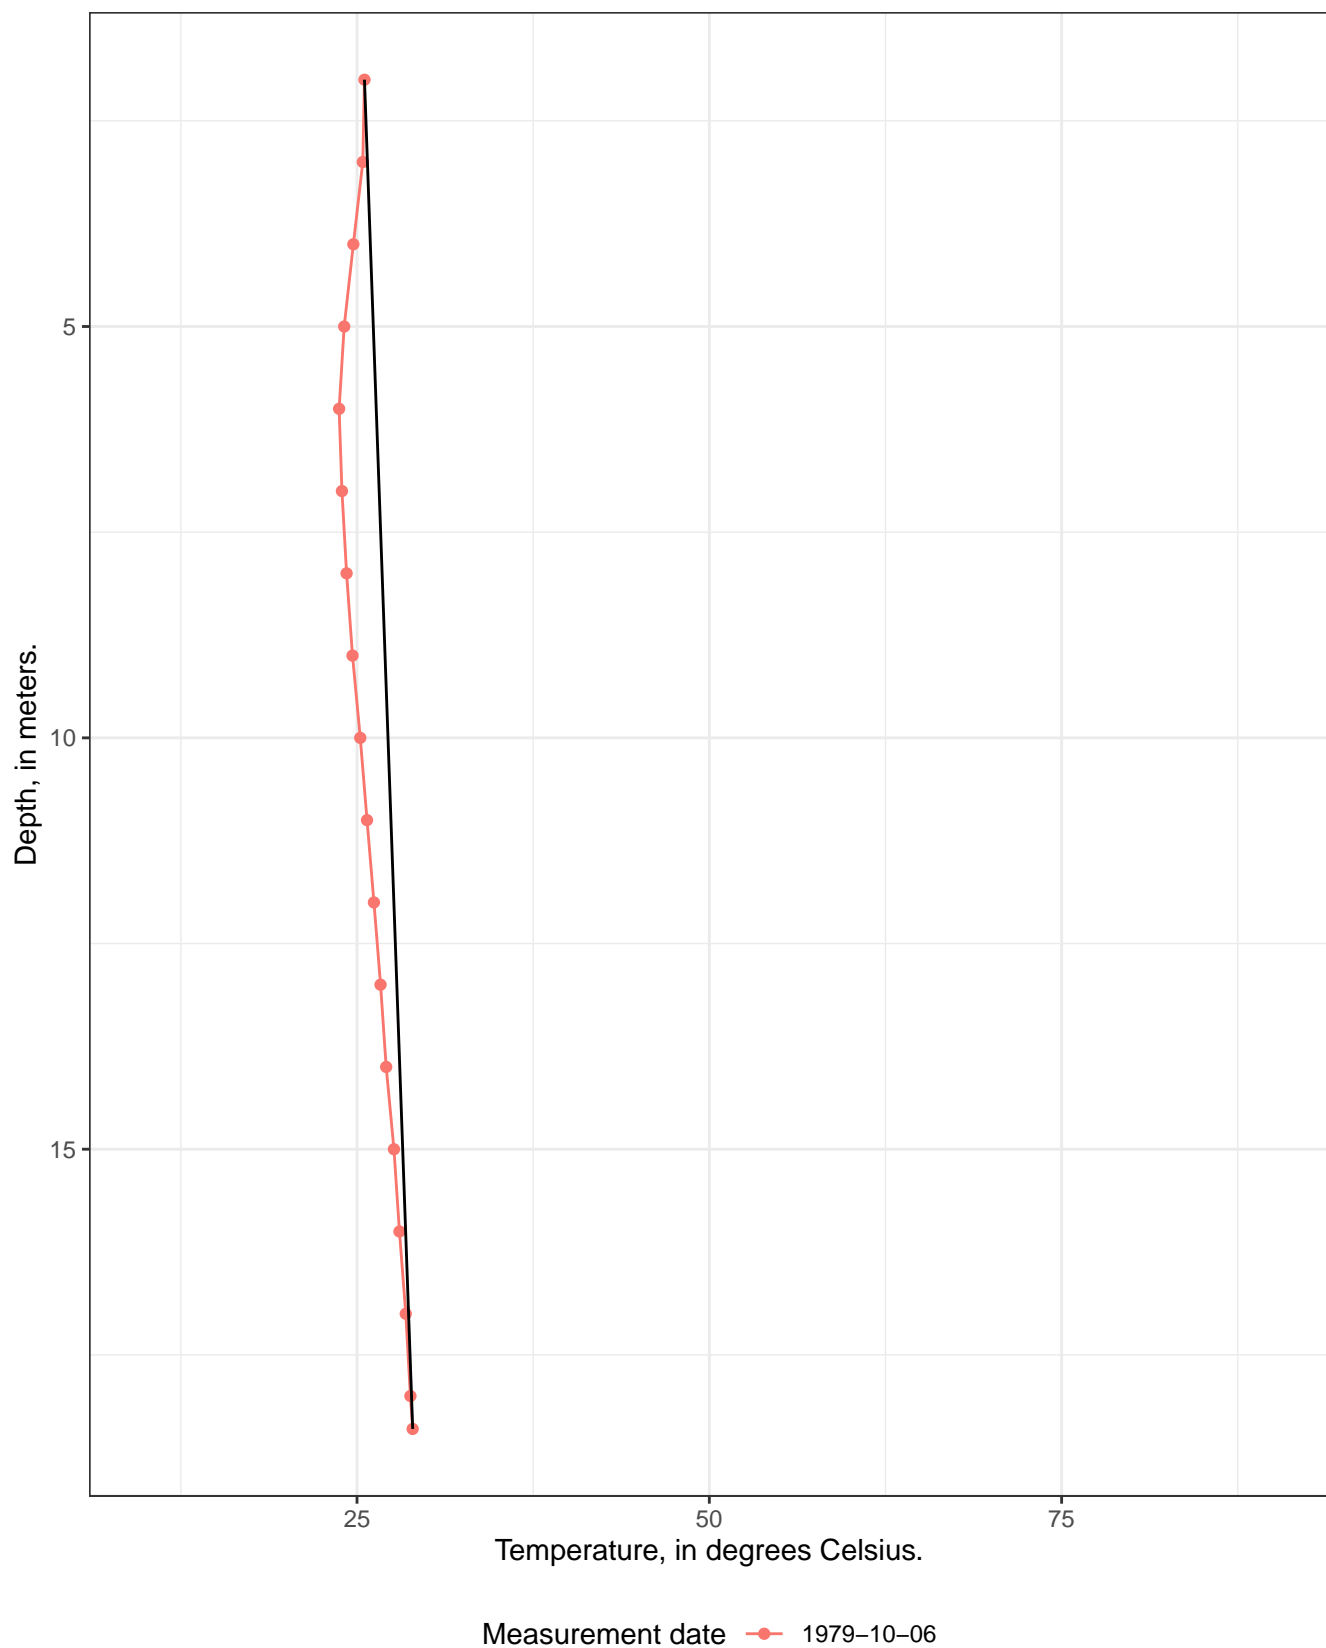

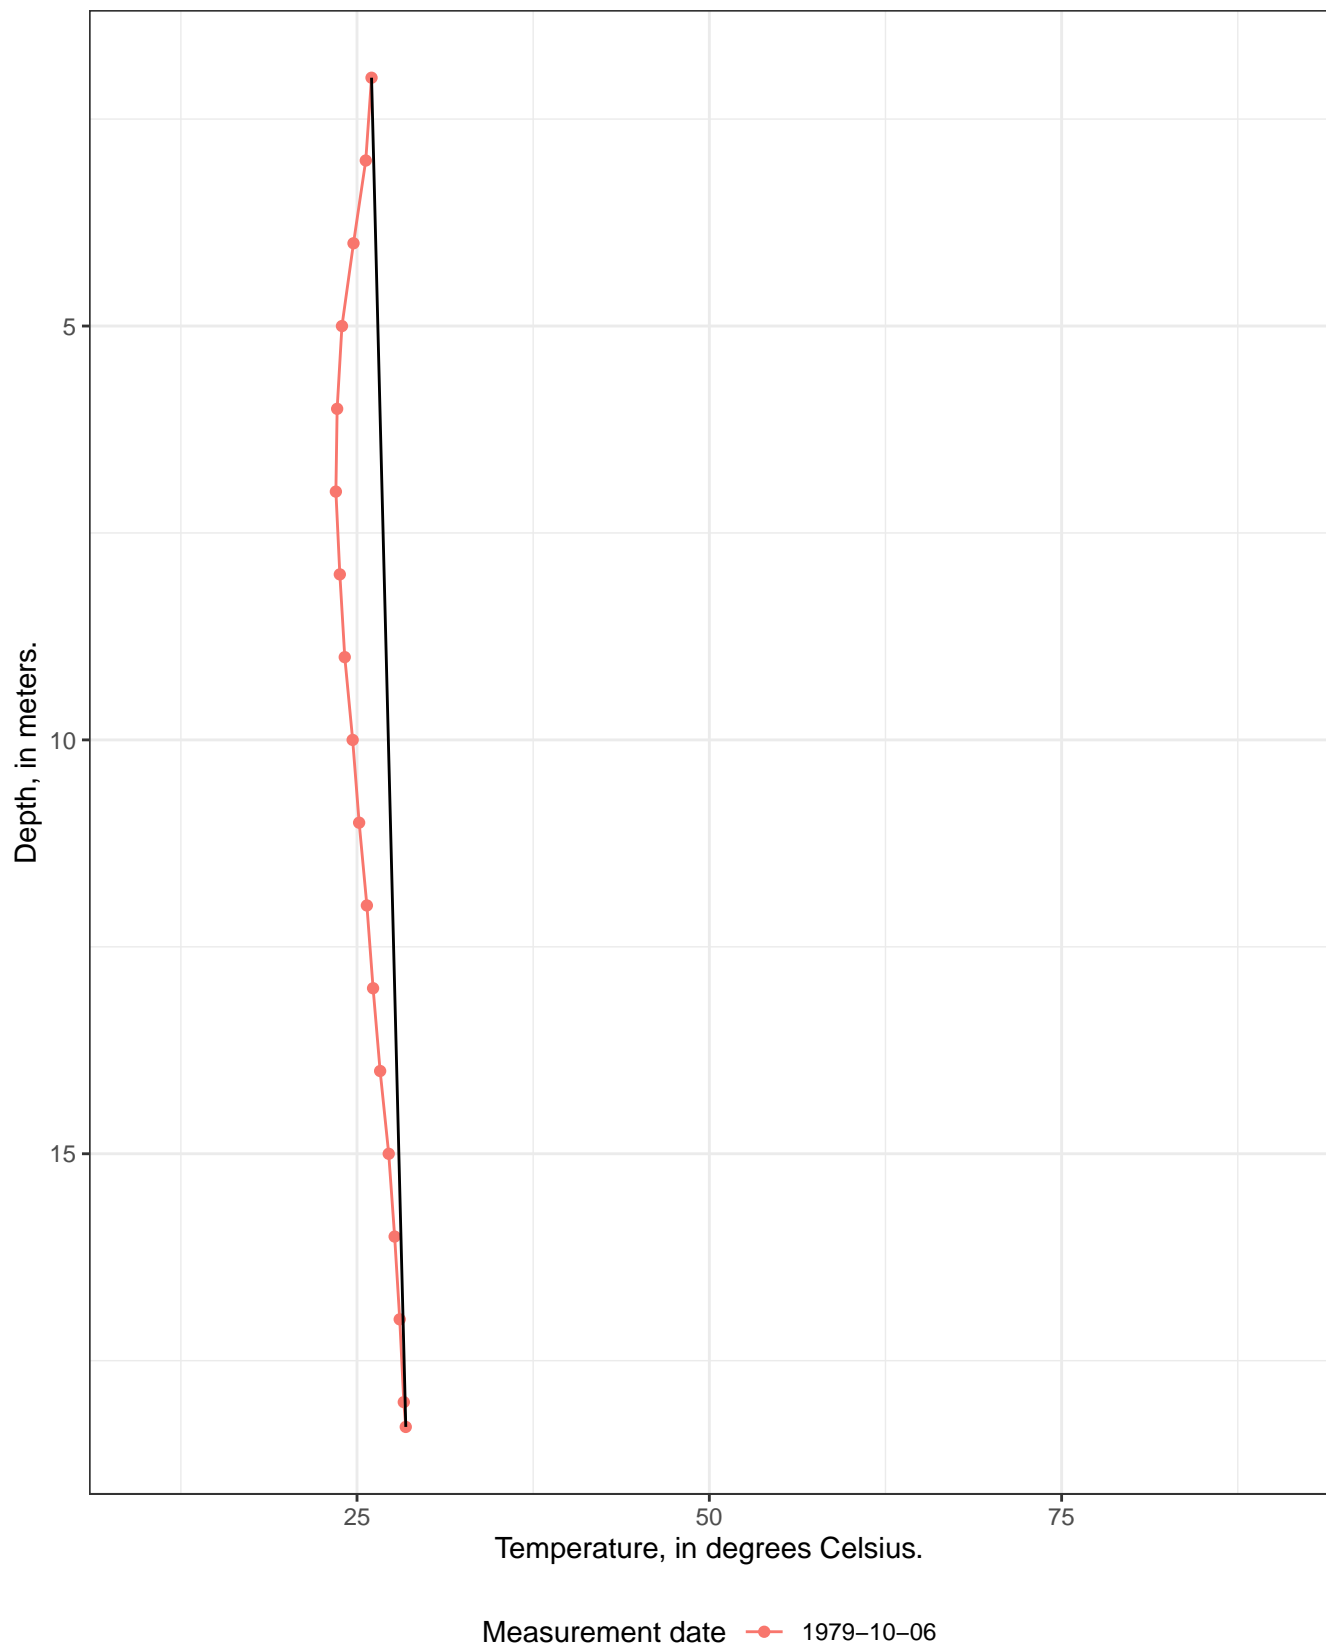

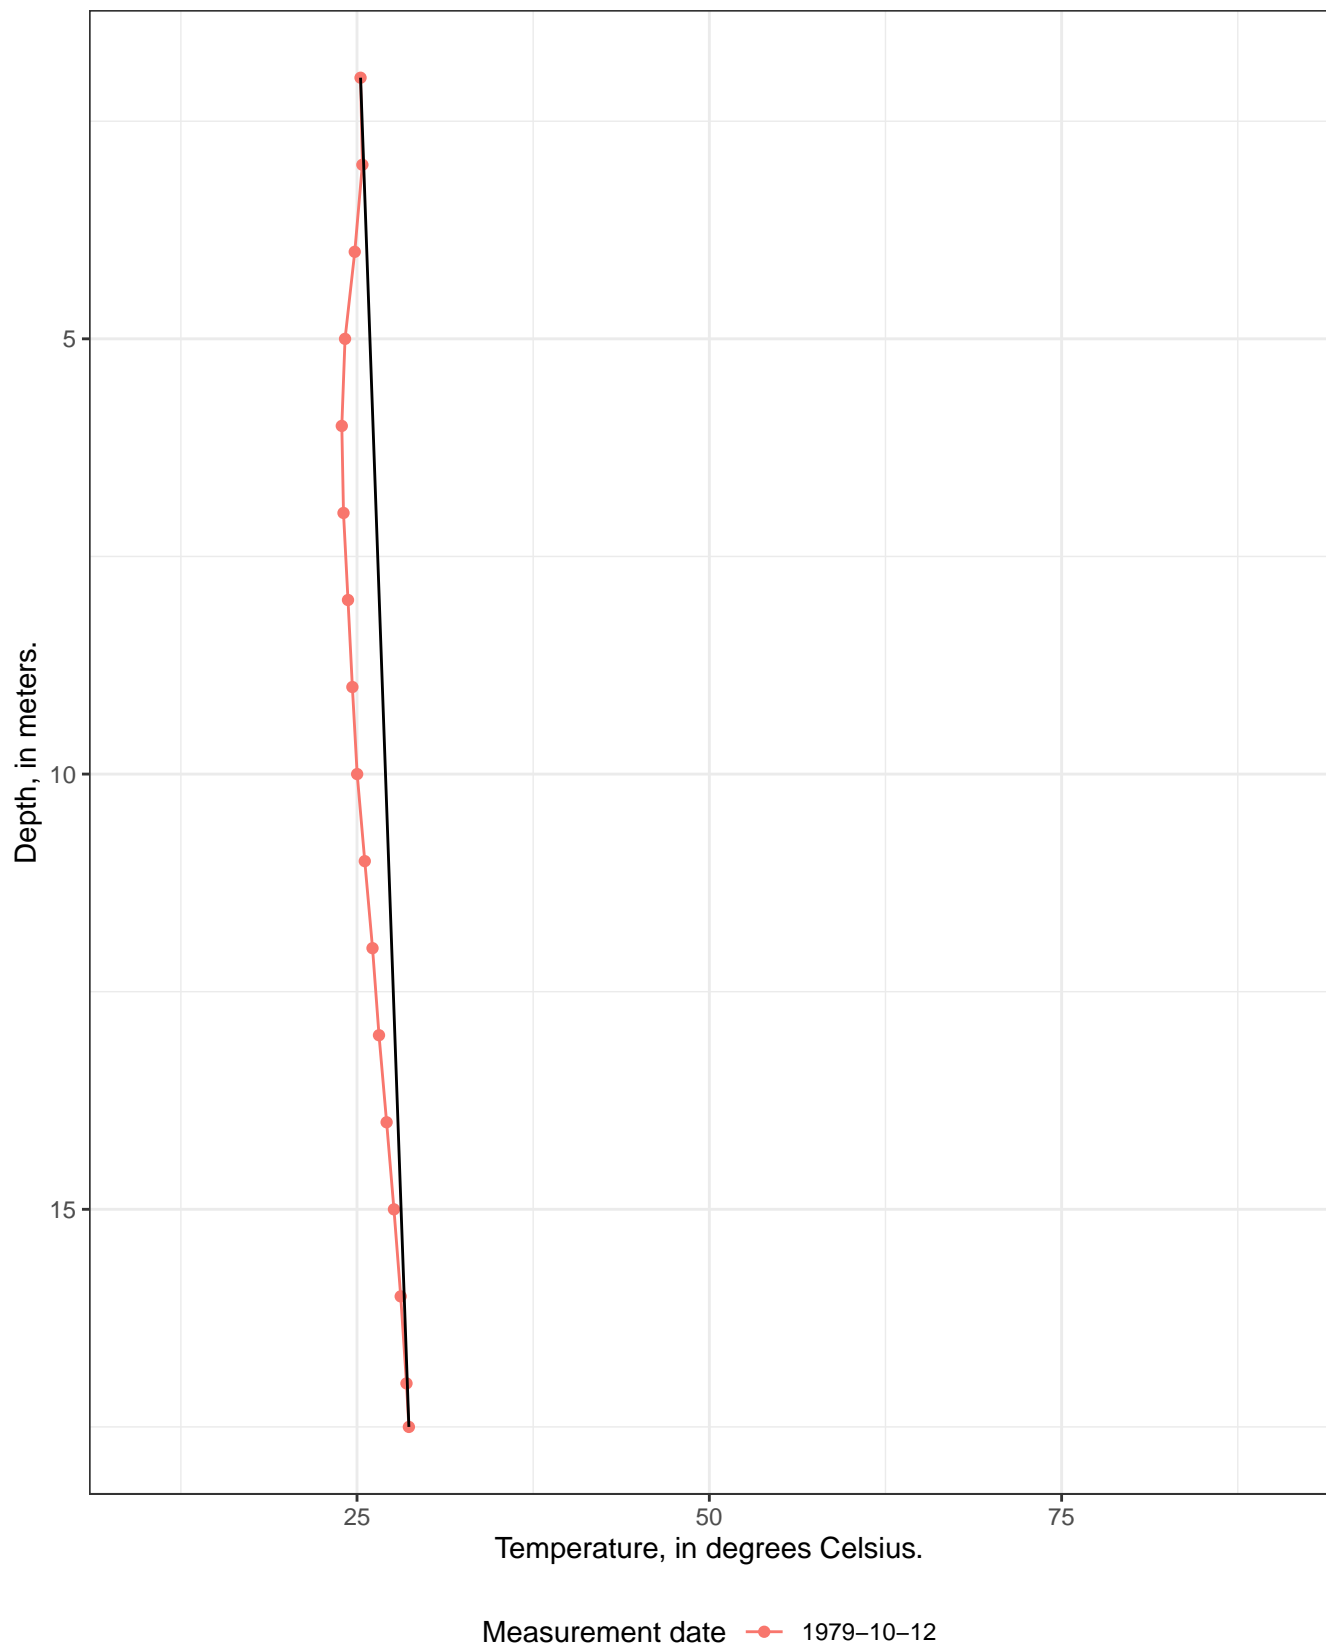

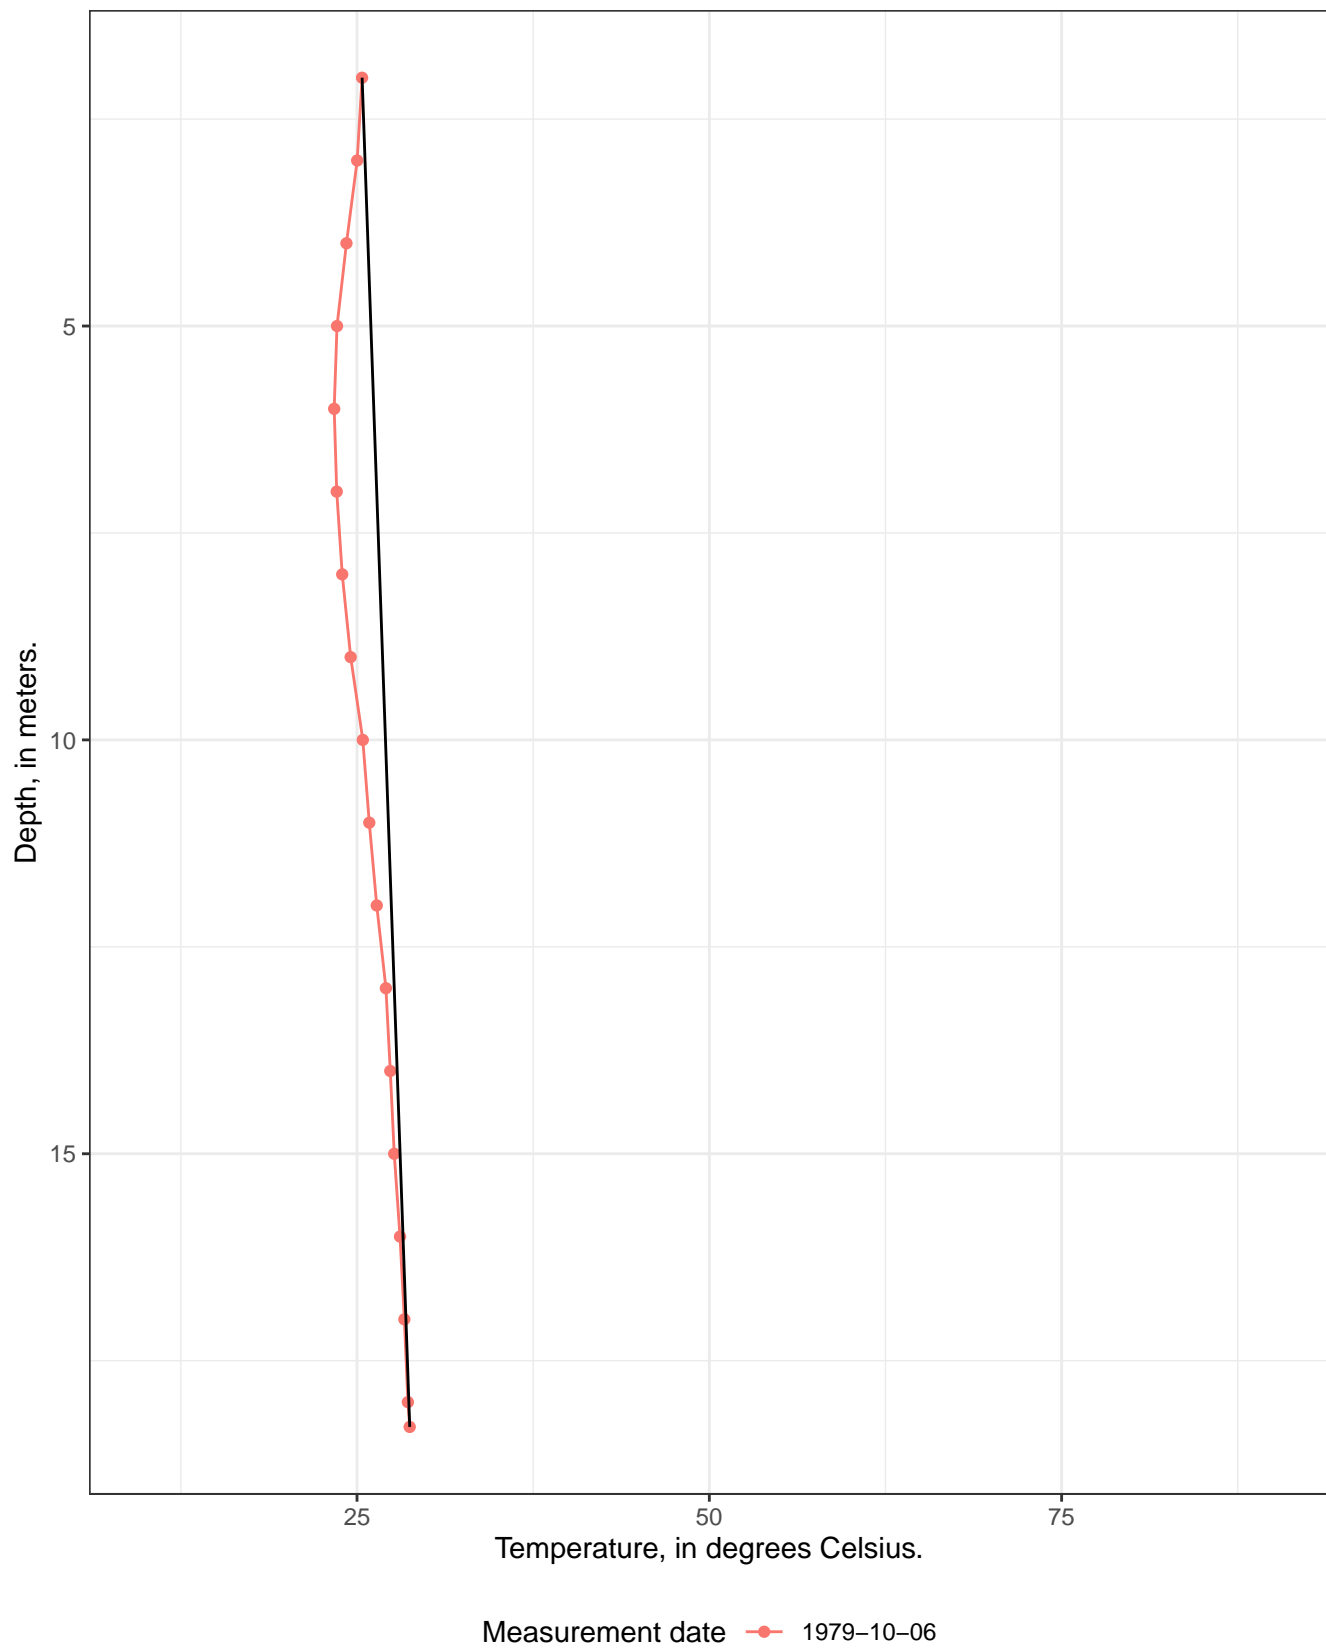

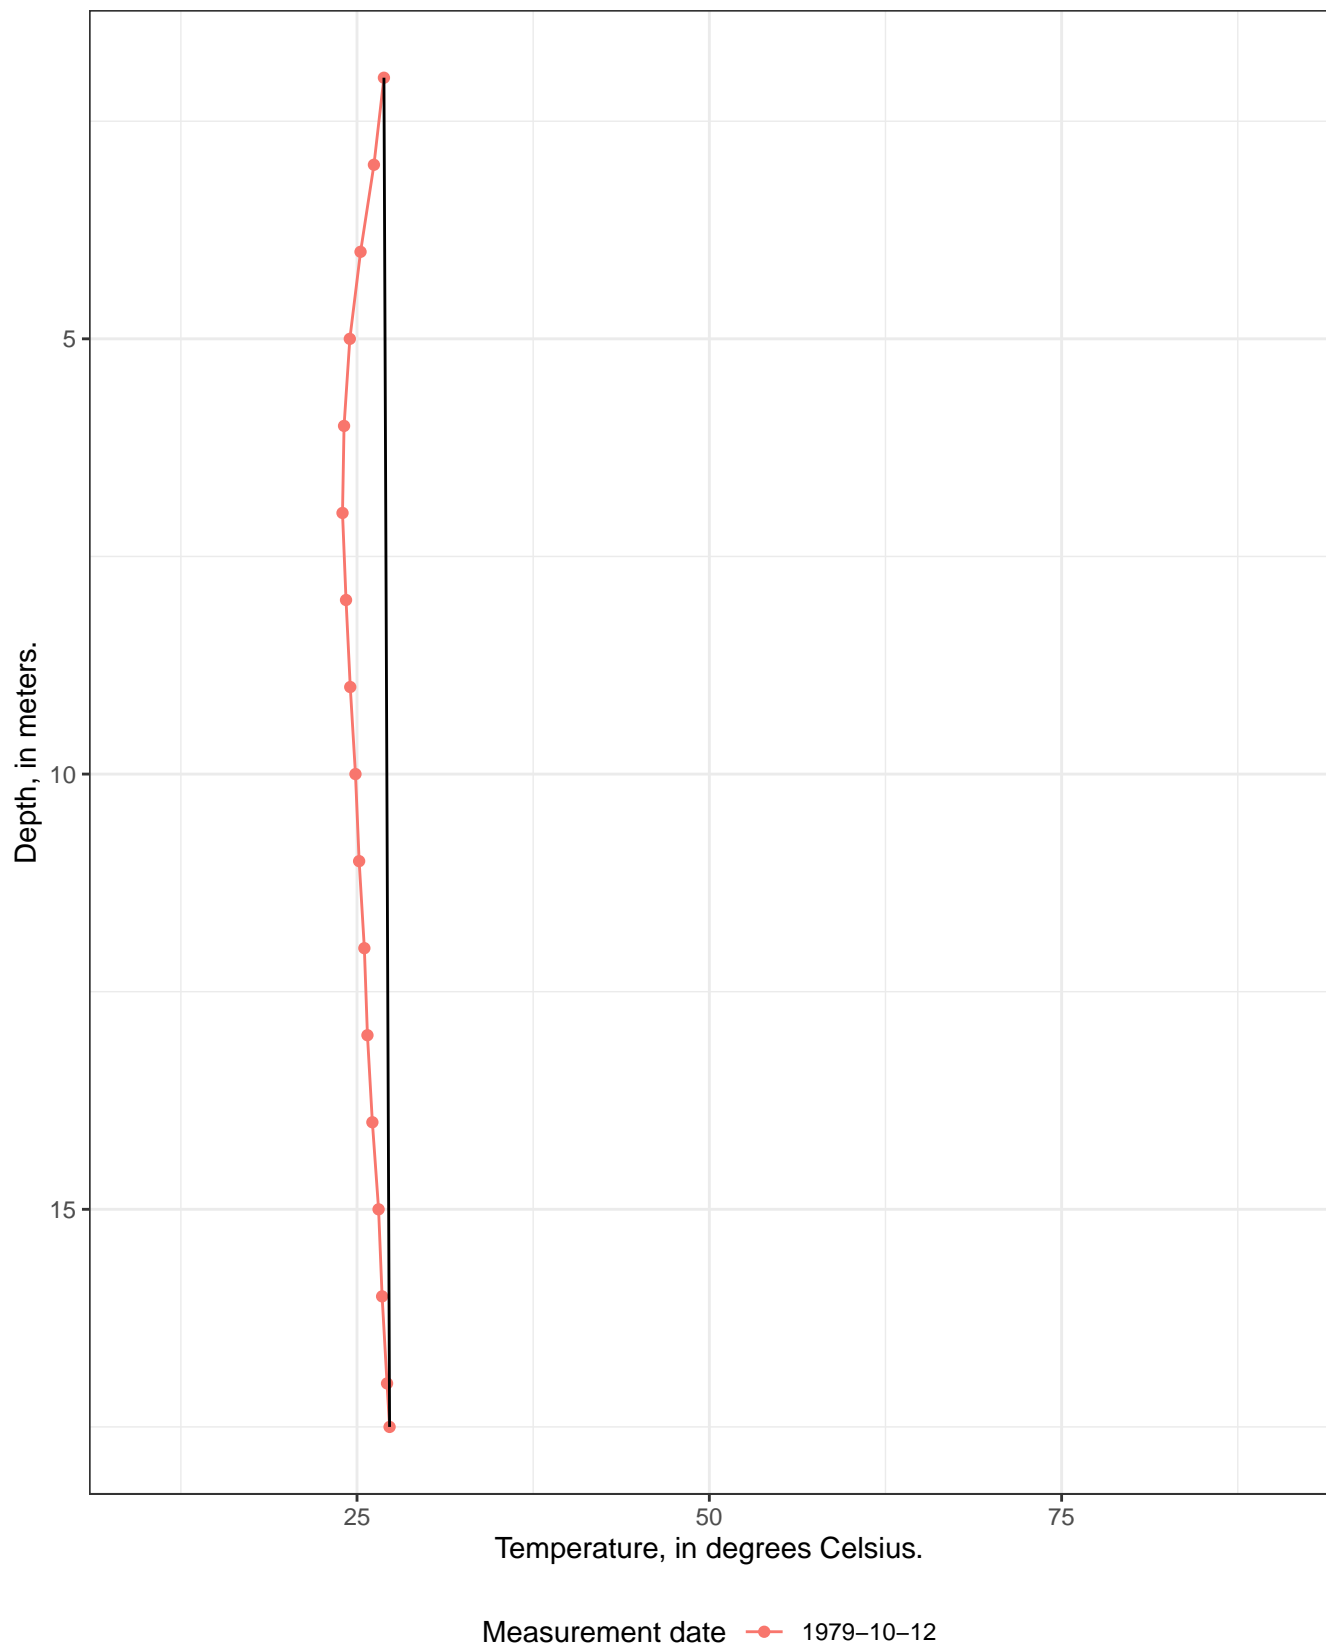

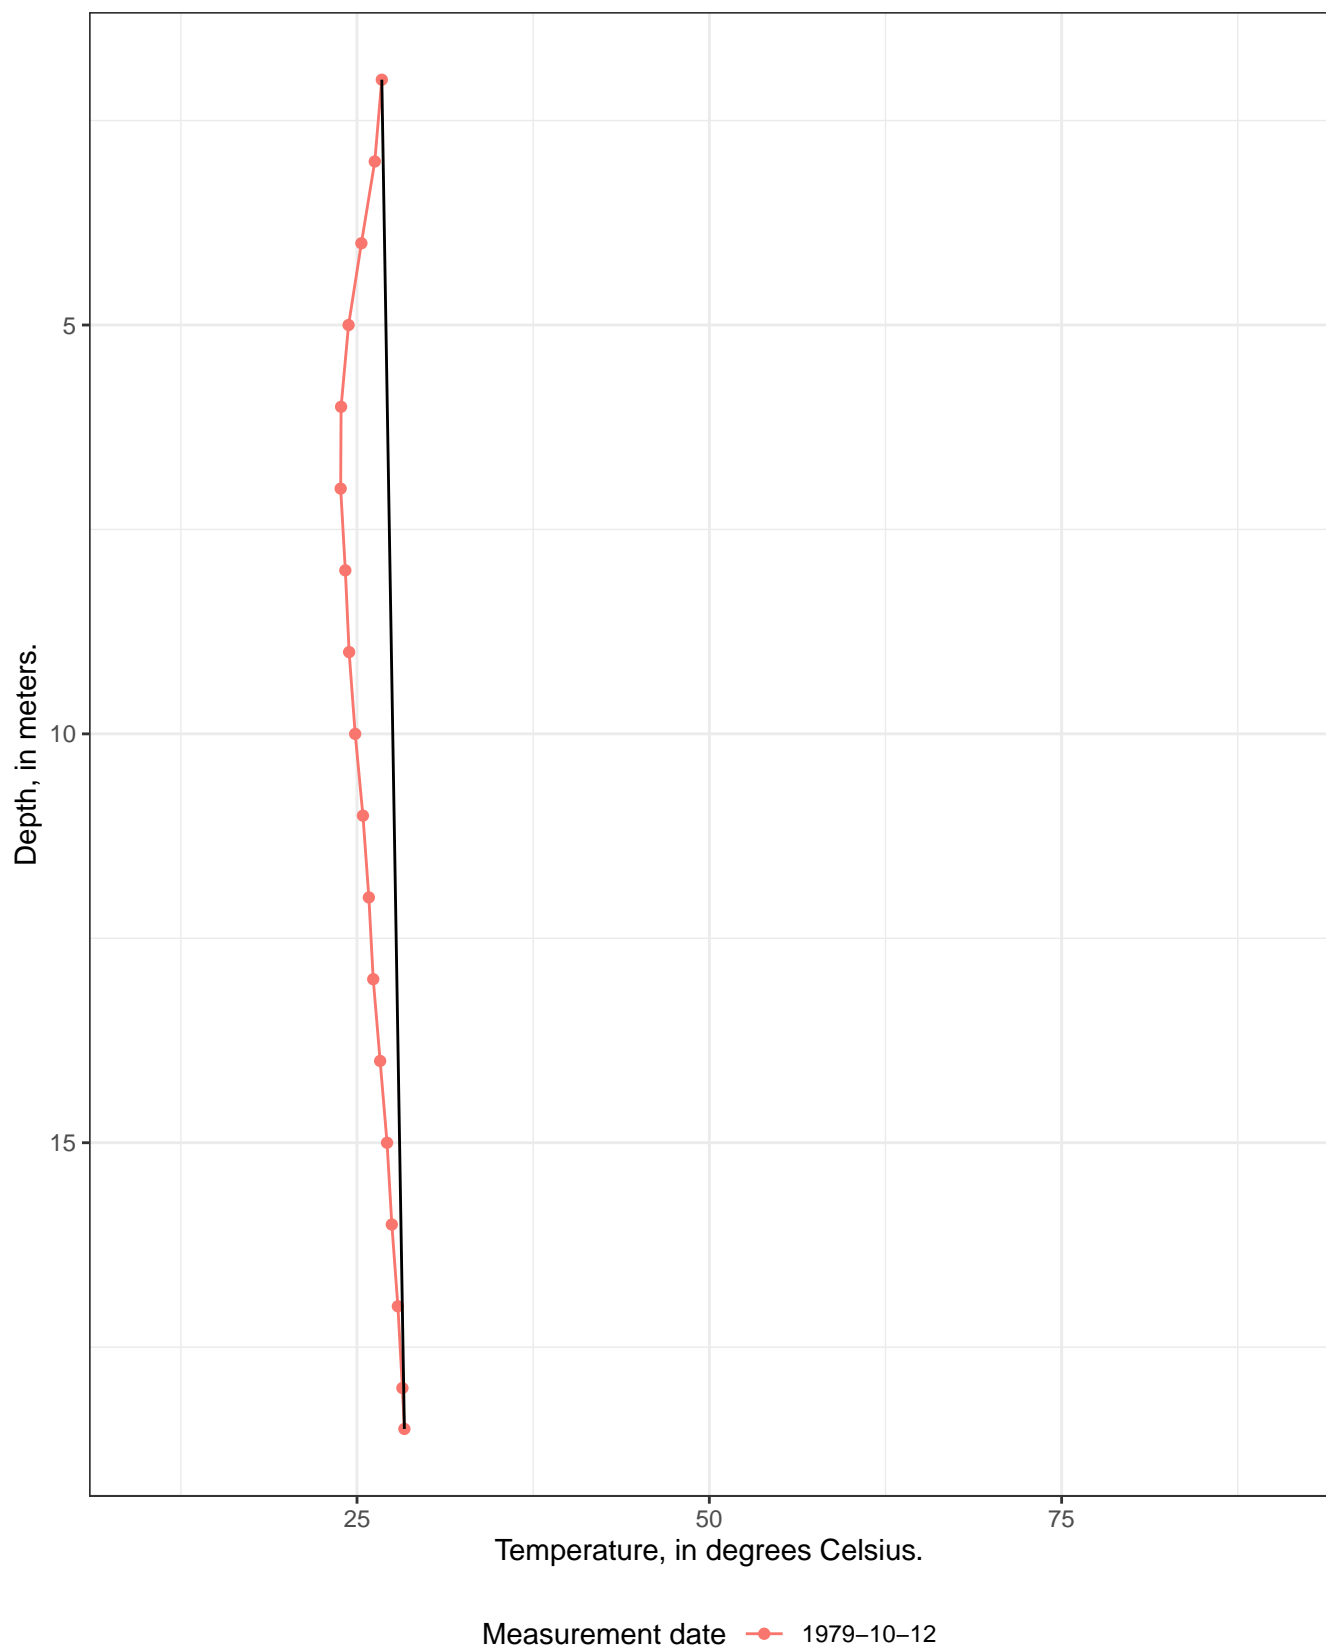

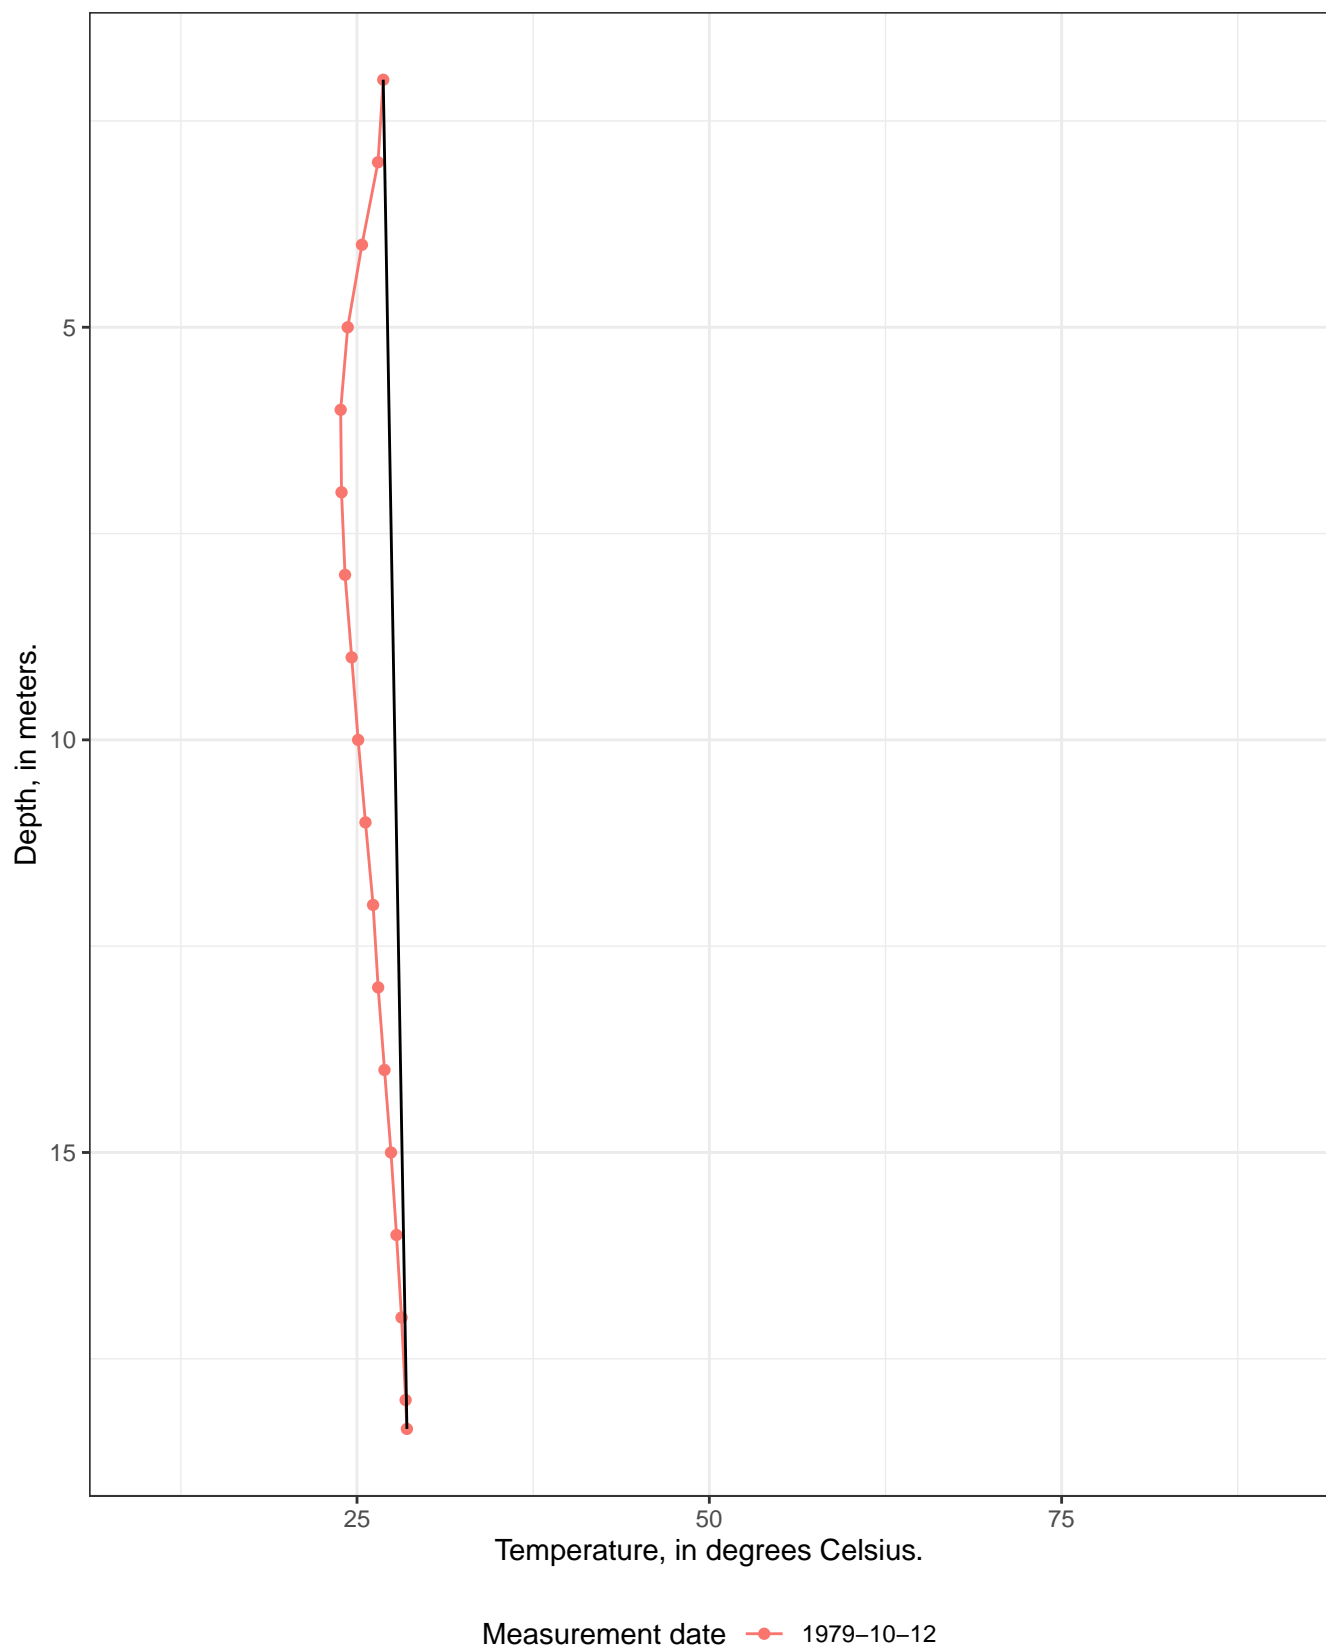

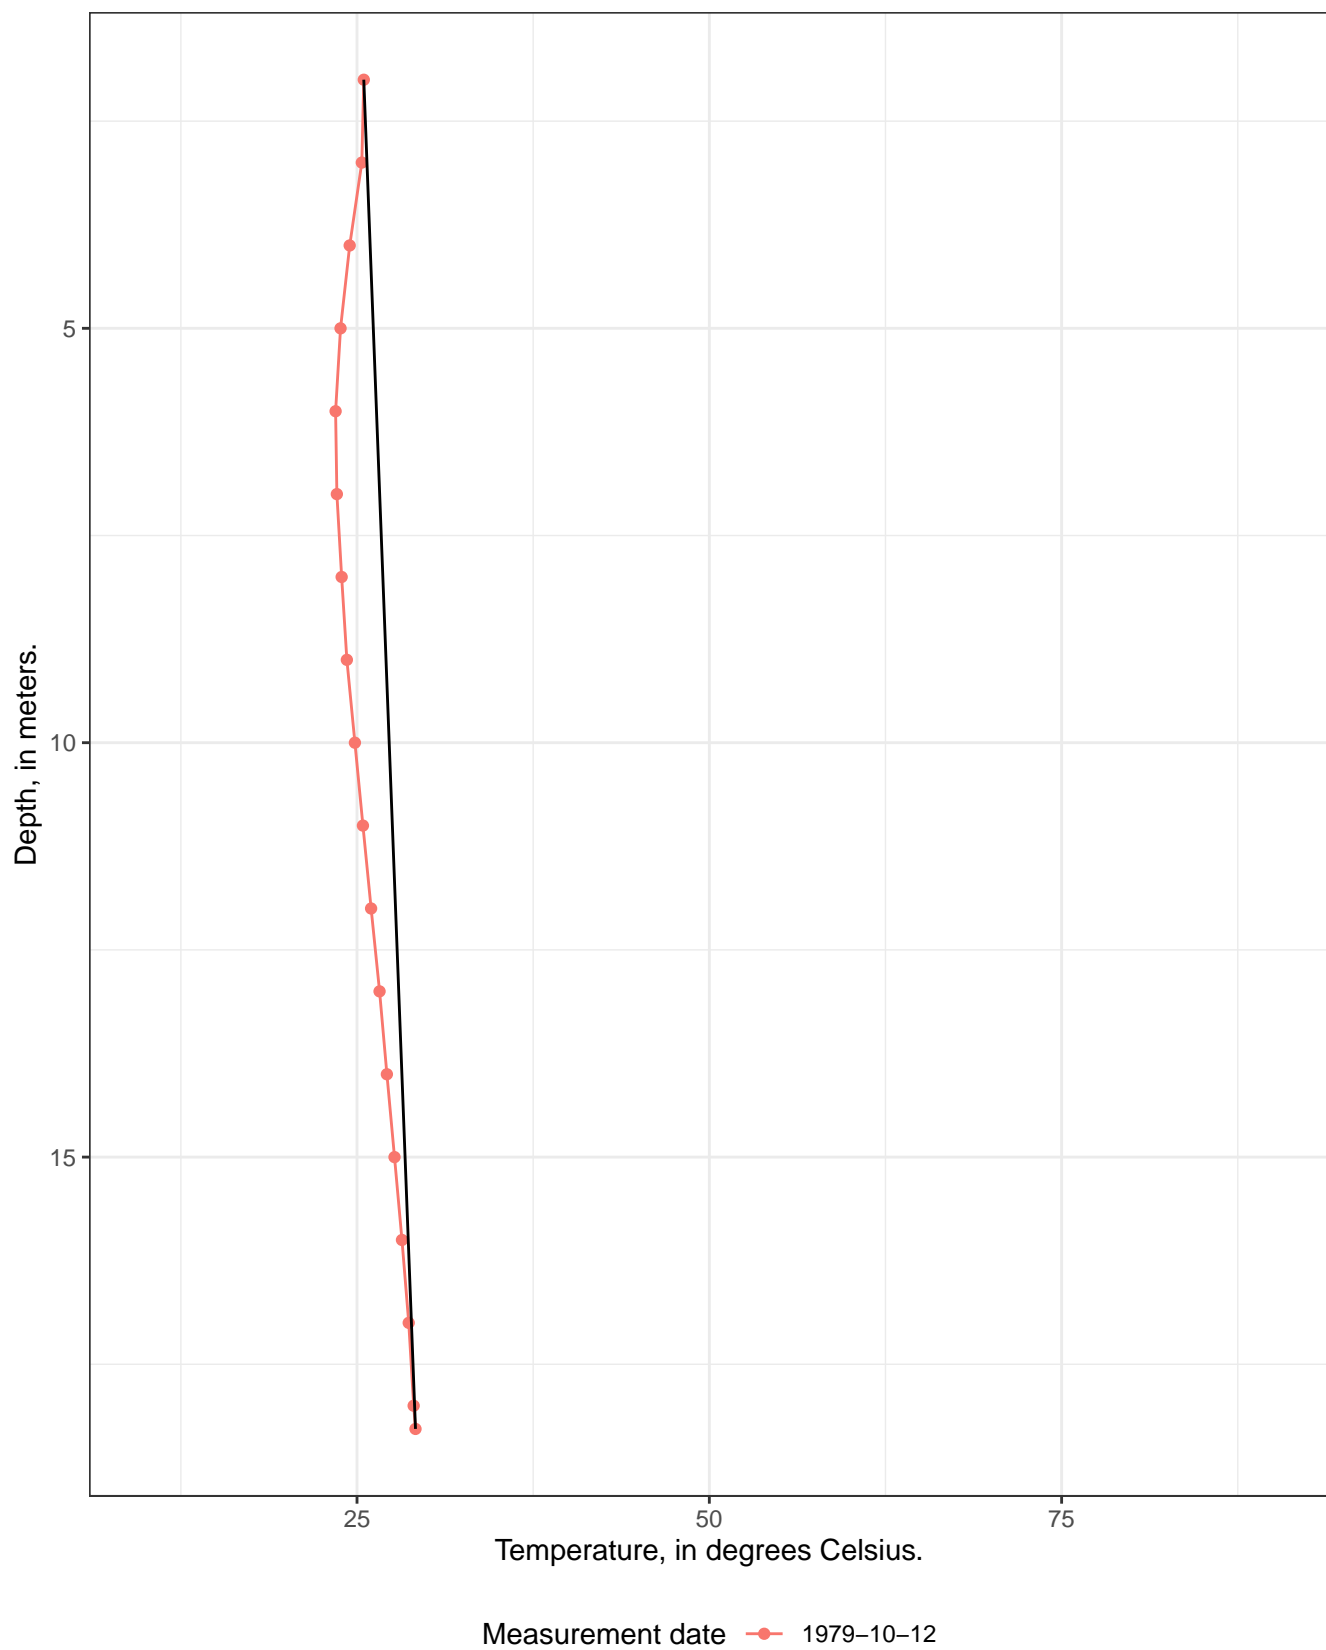



ID: 360 [TG-NMSU-2]

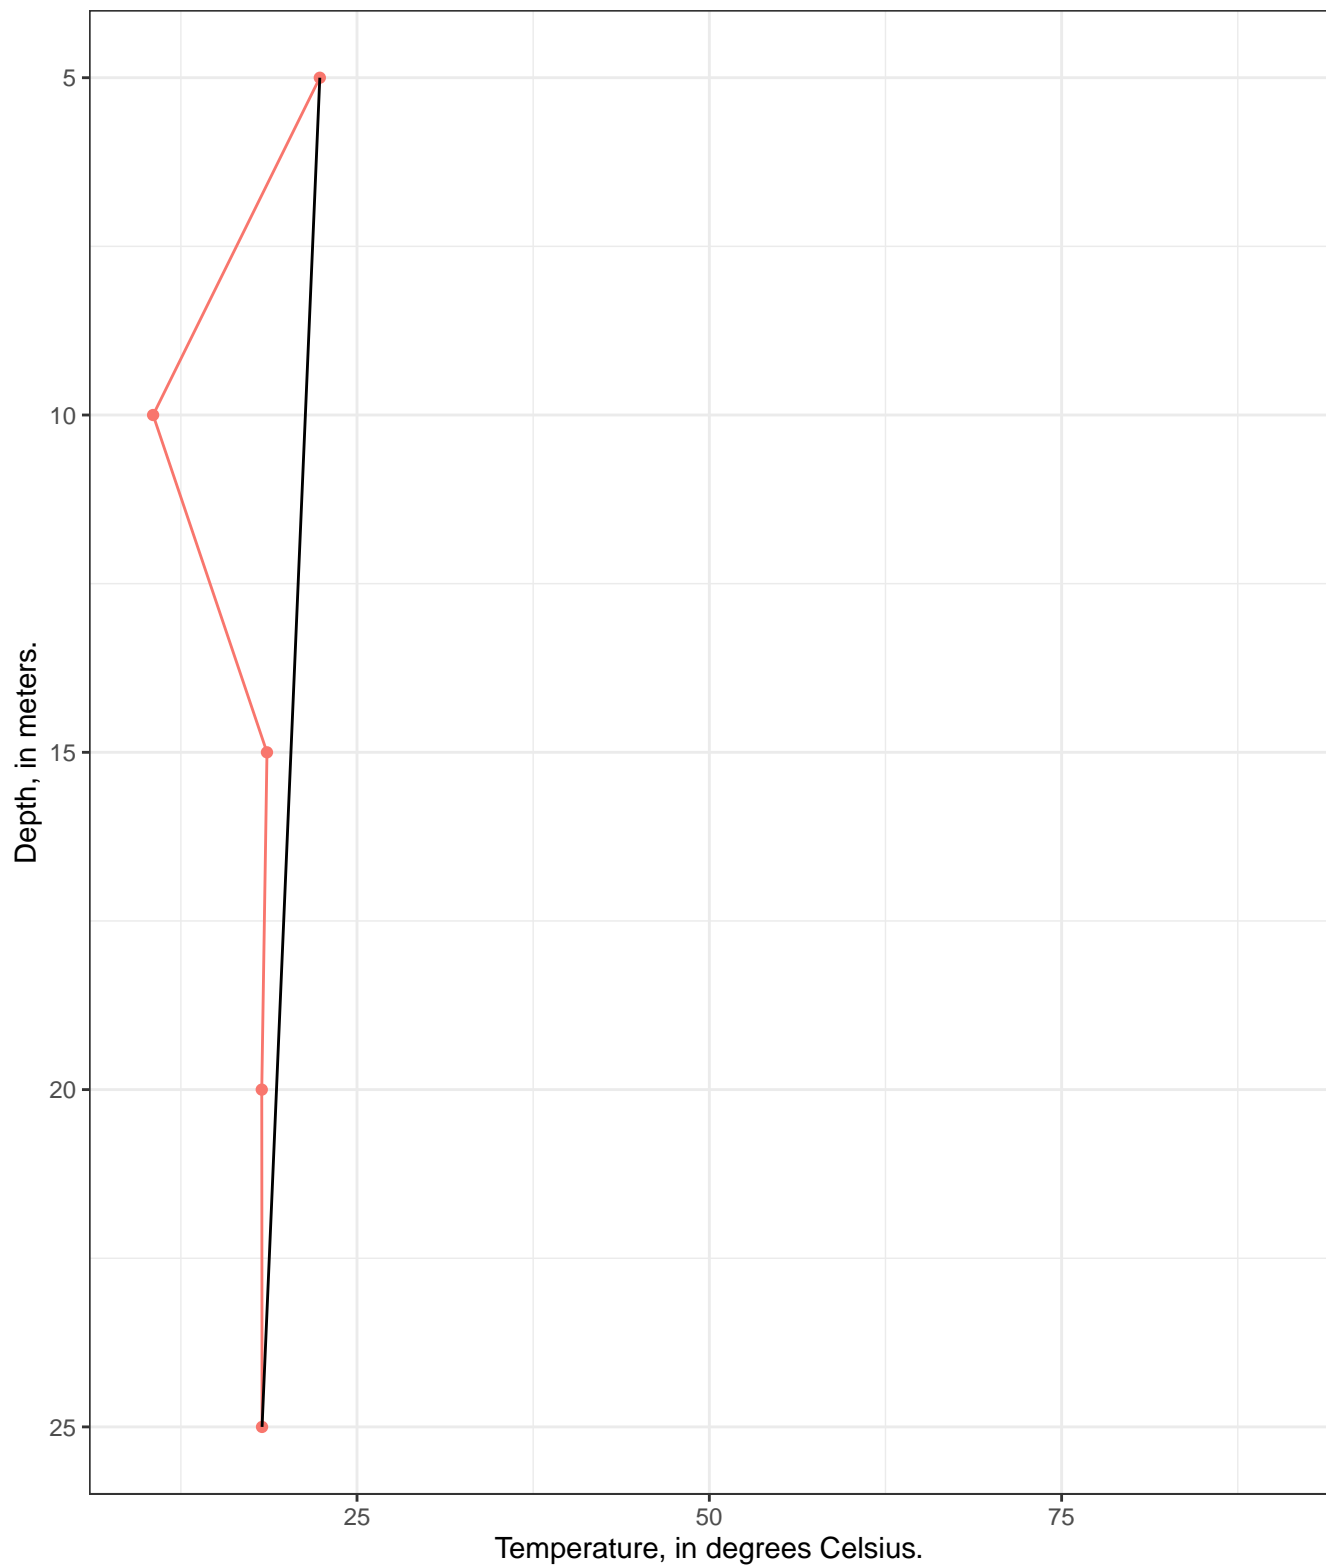

Measurement date 1980-01-01

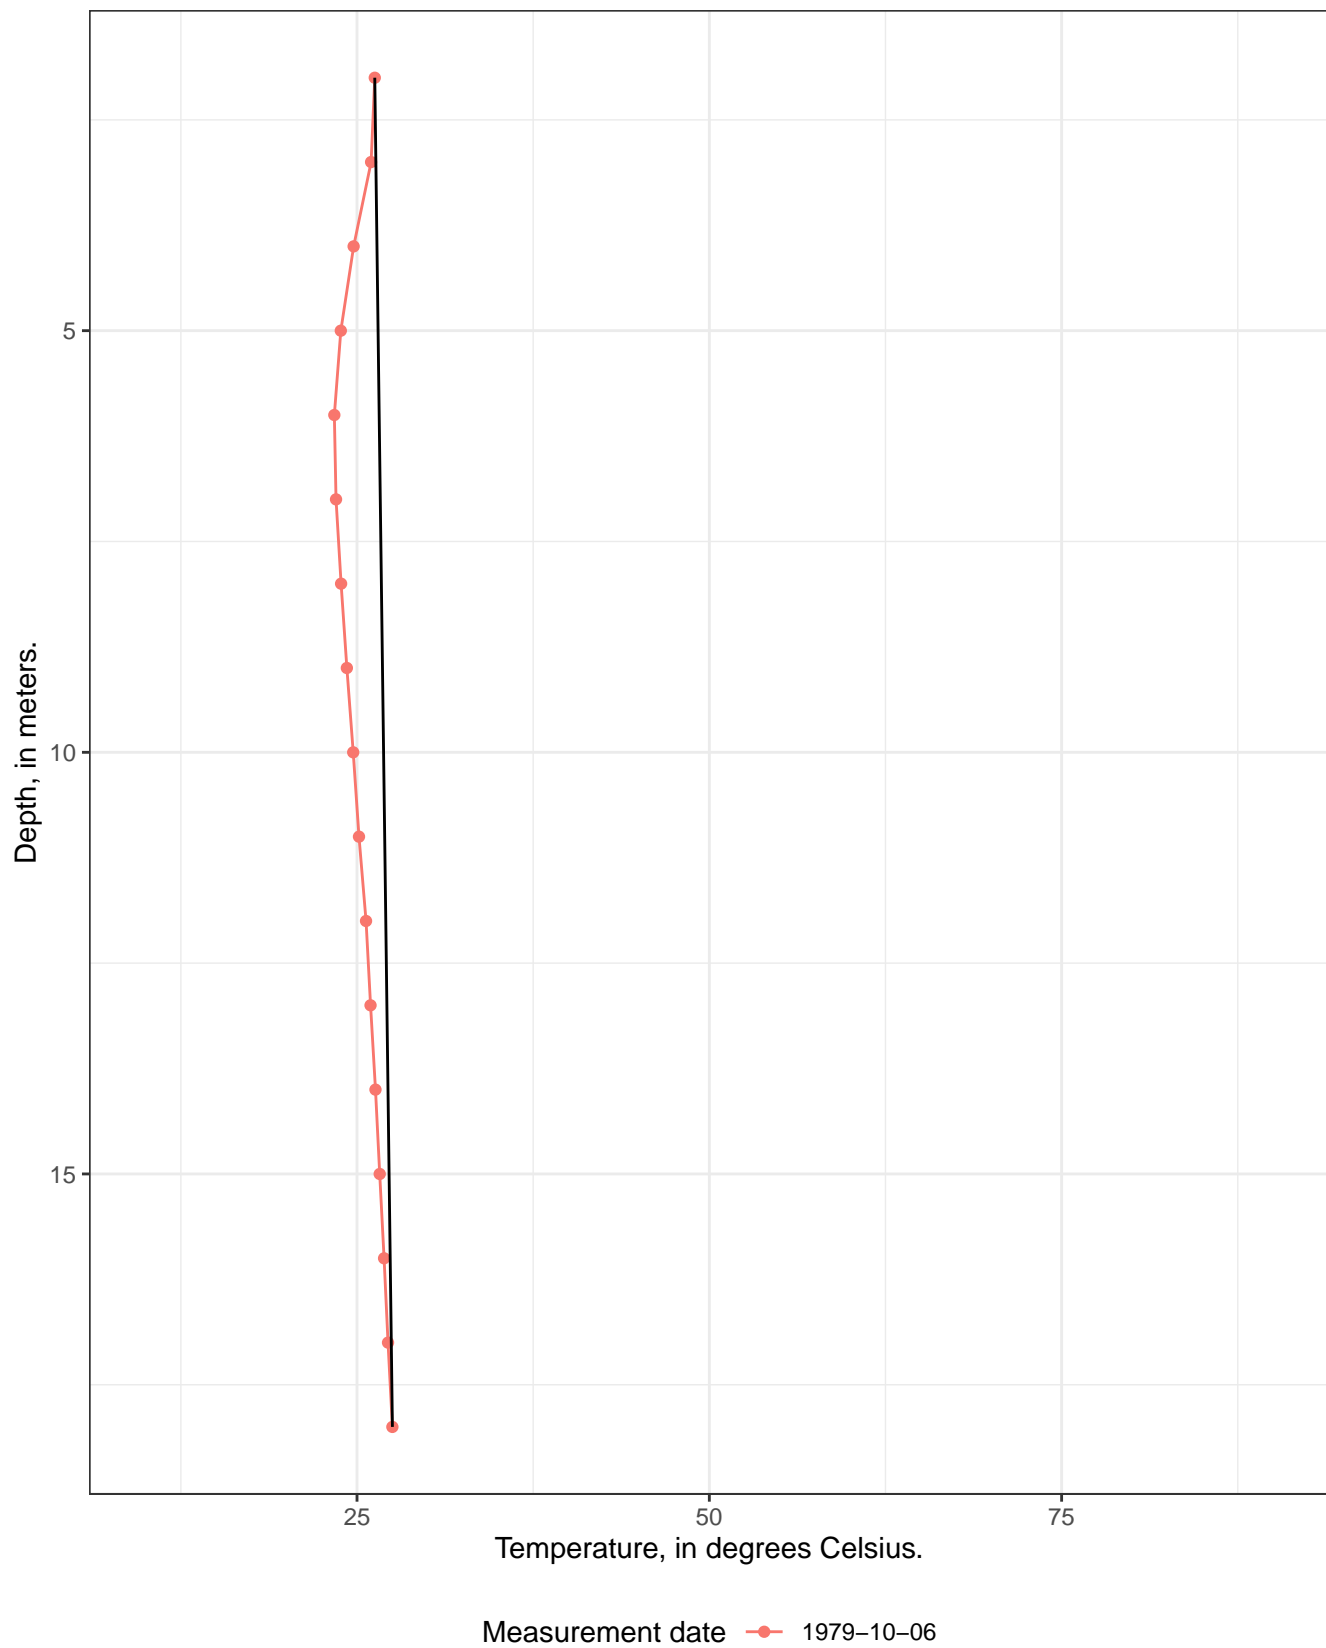

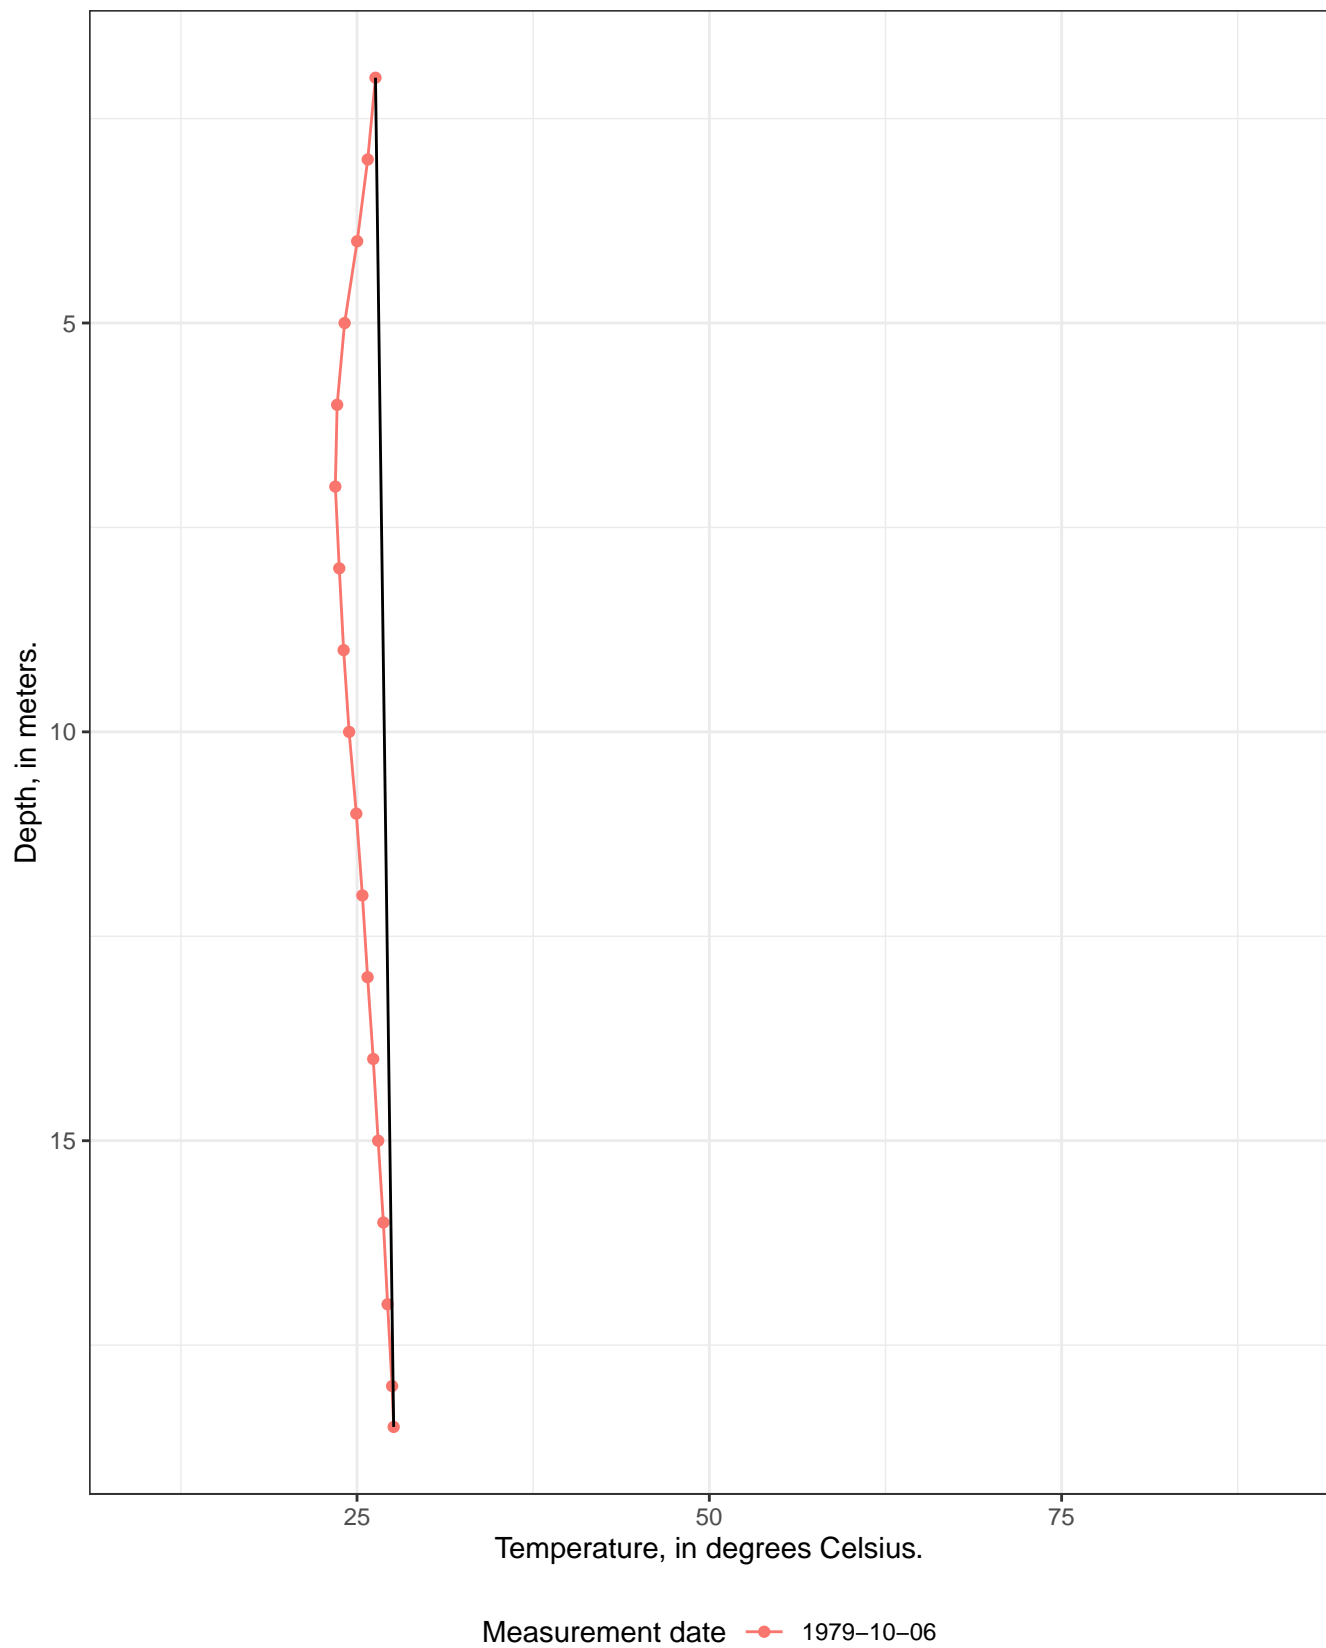

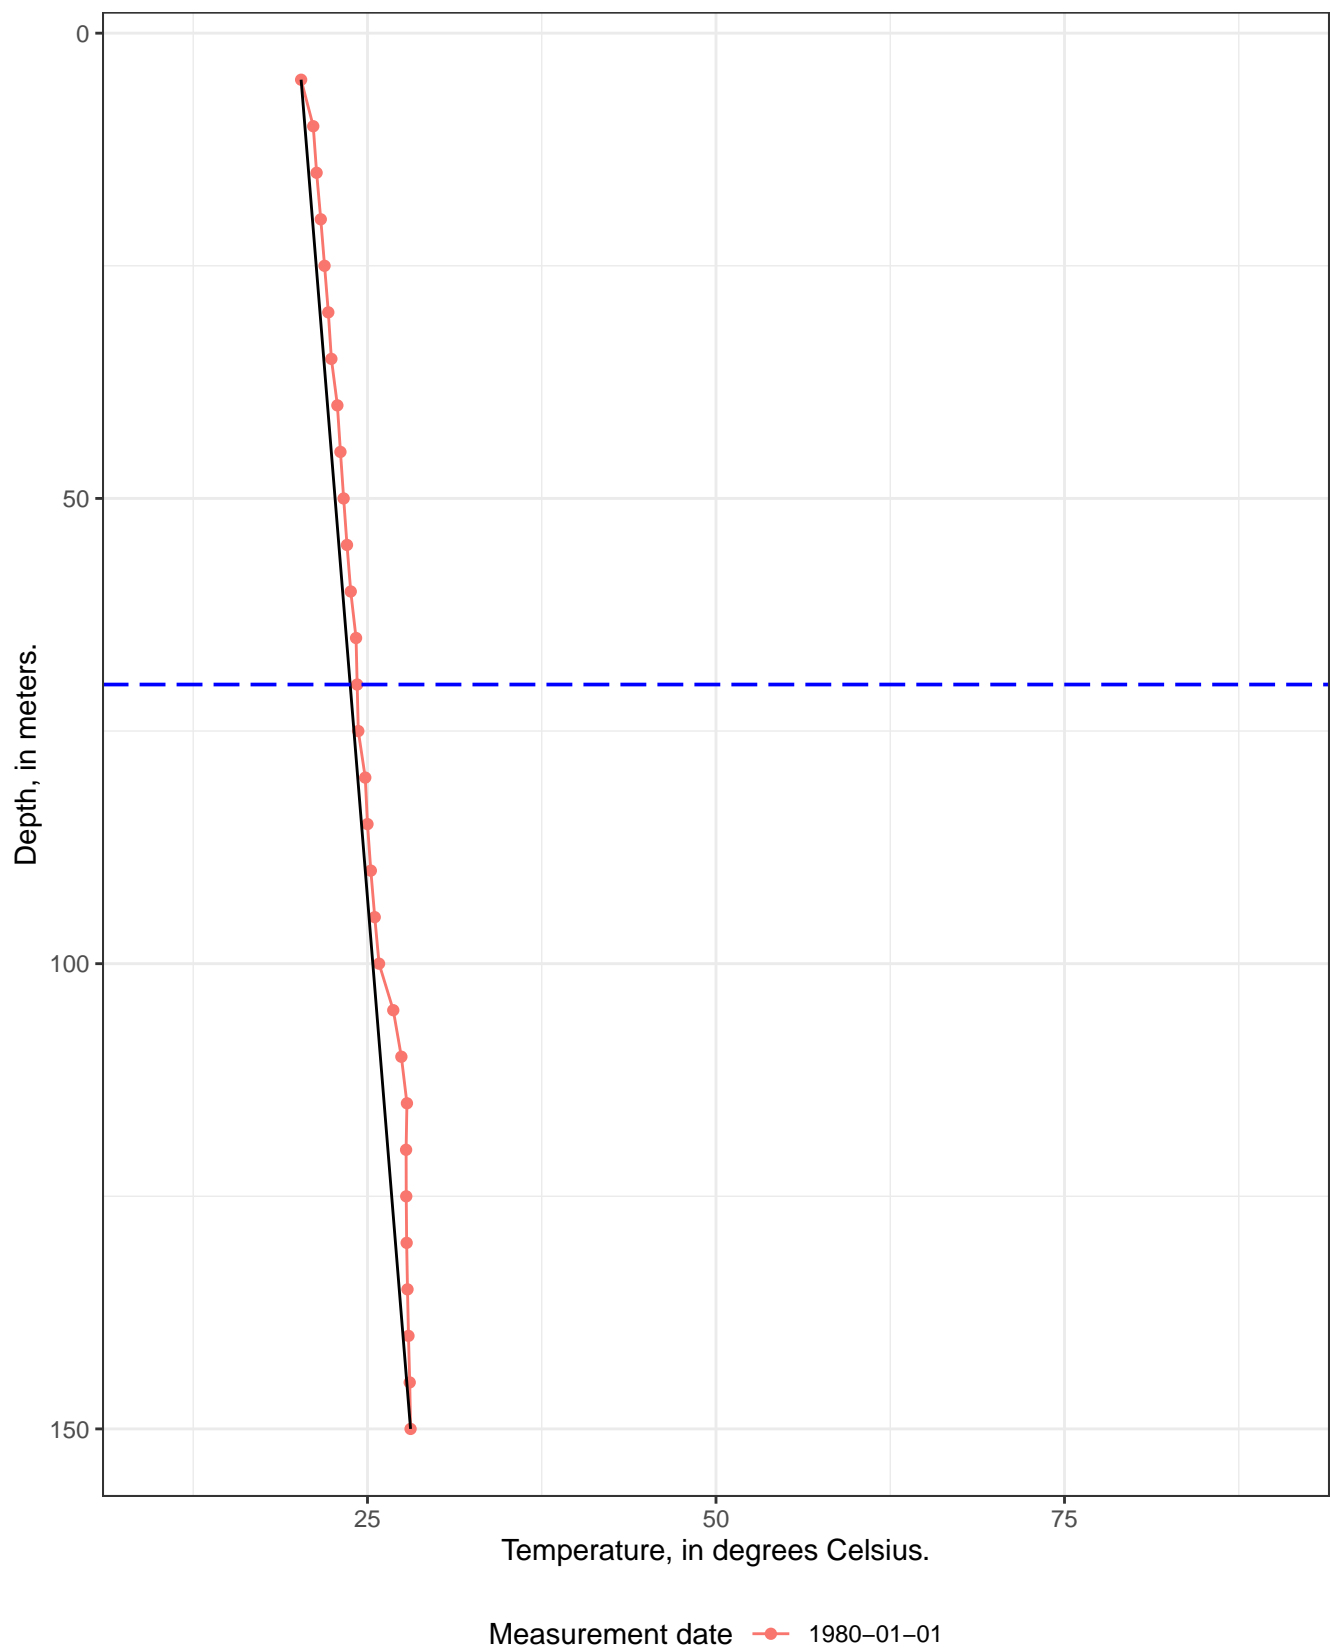

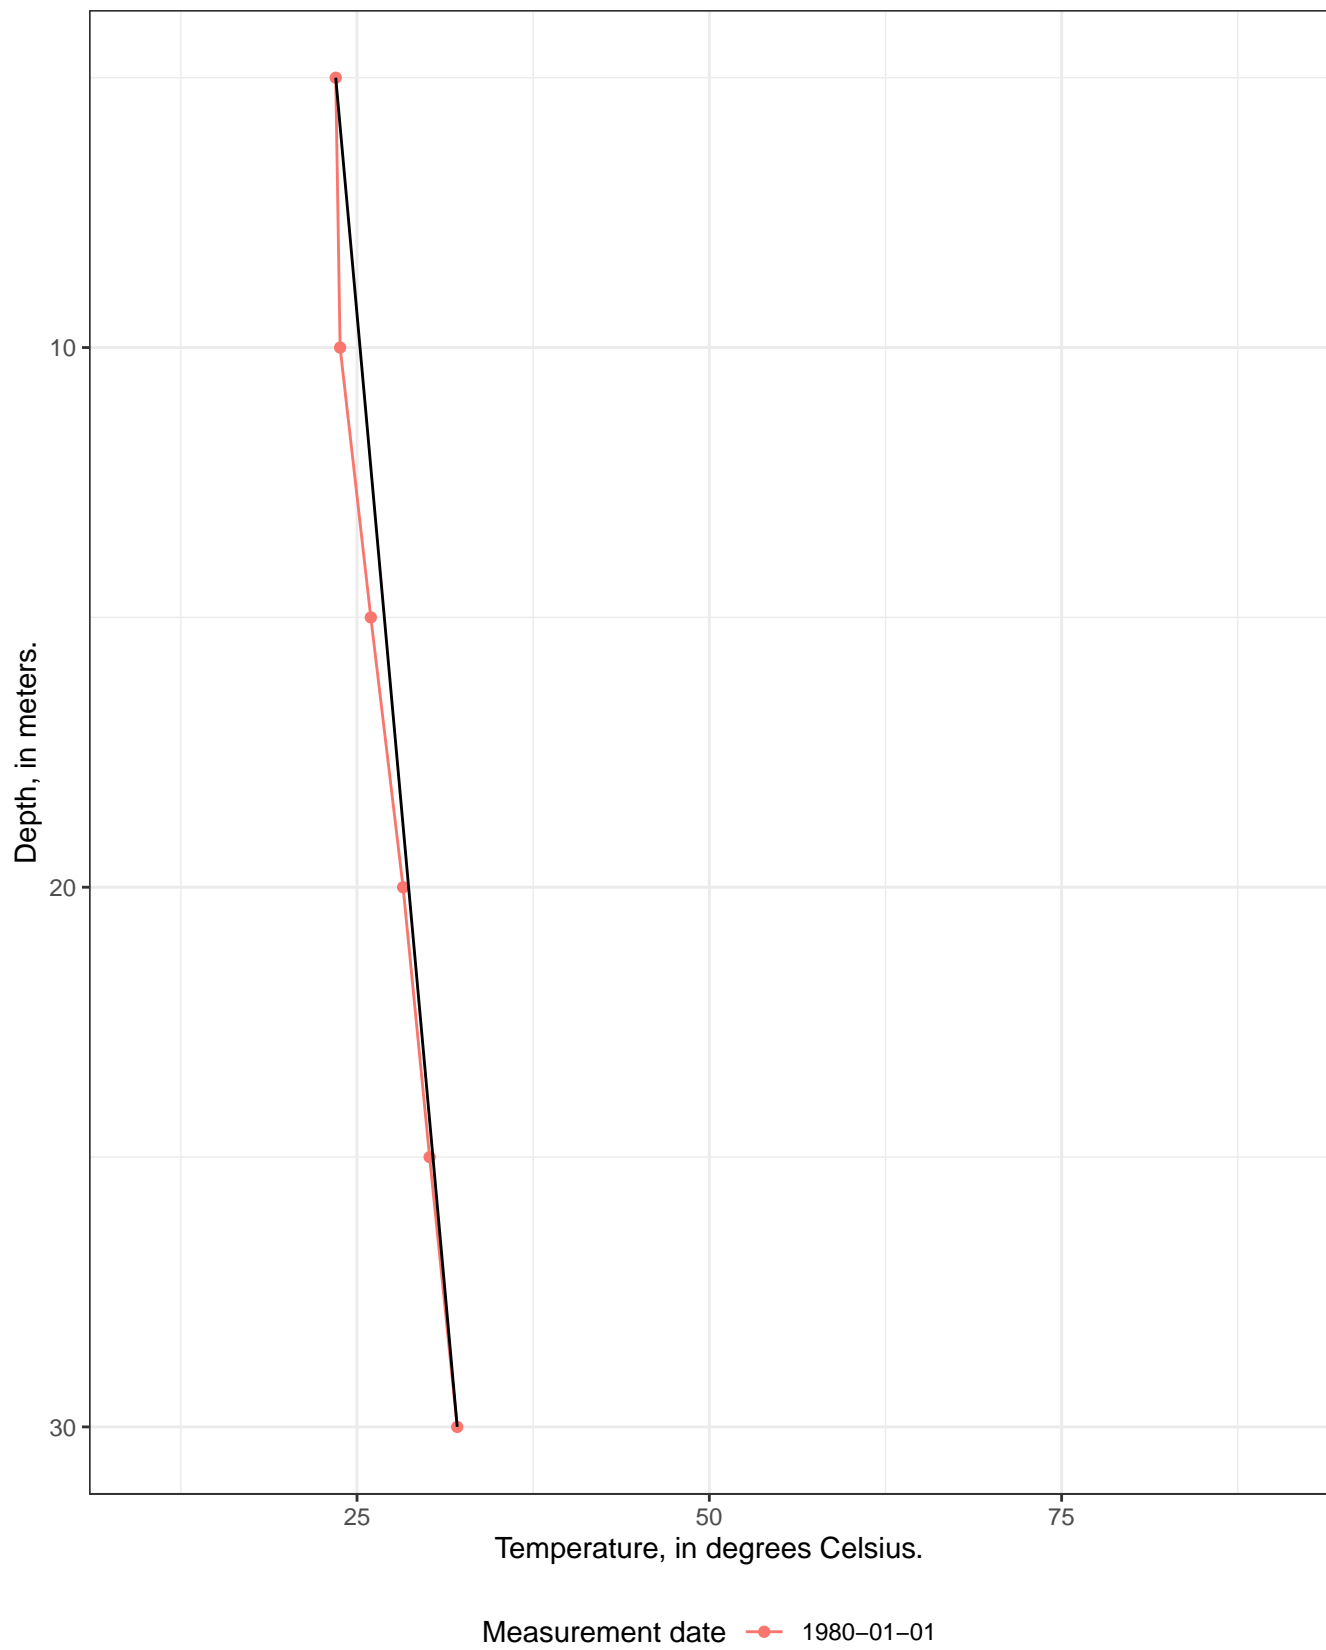

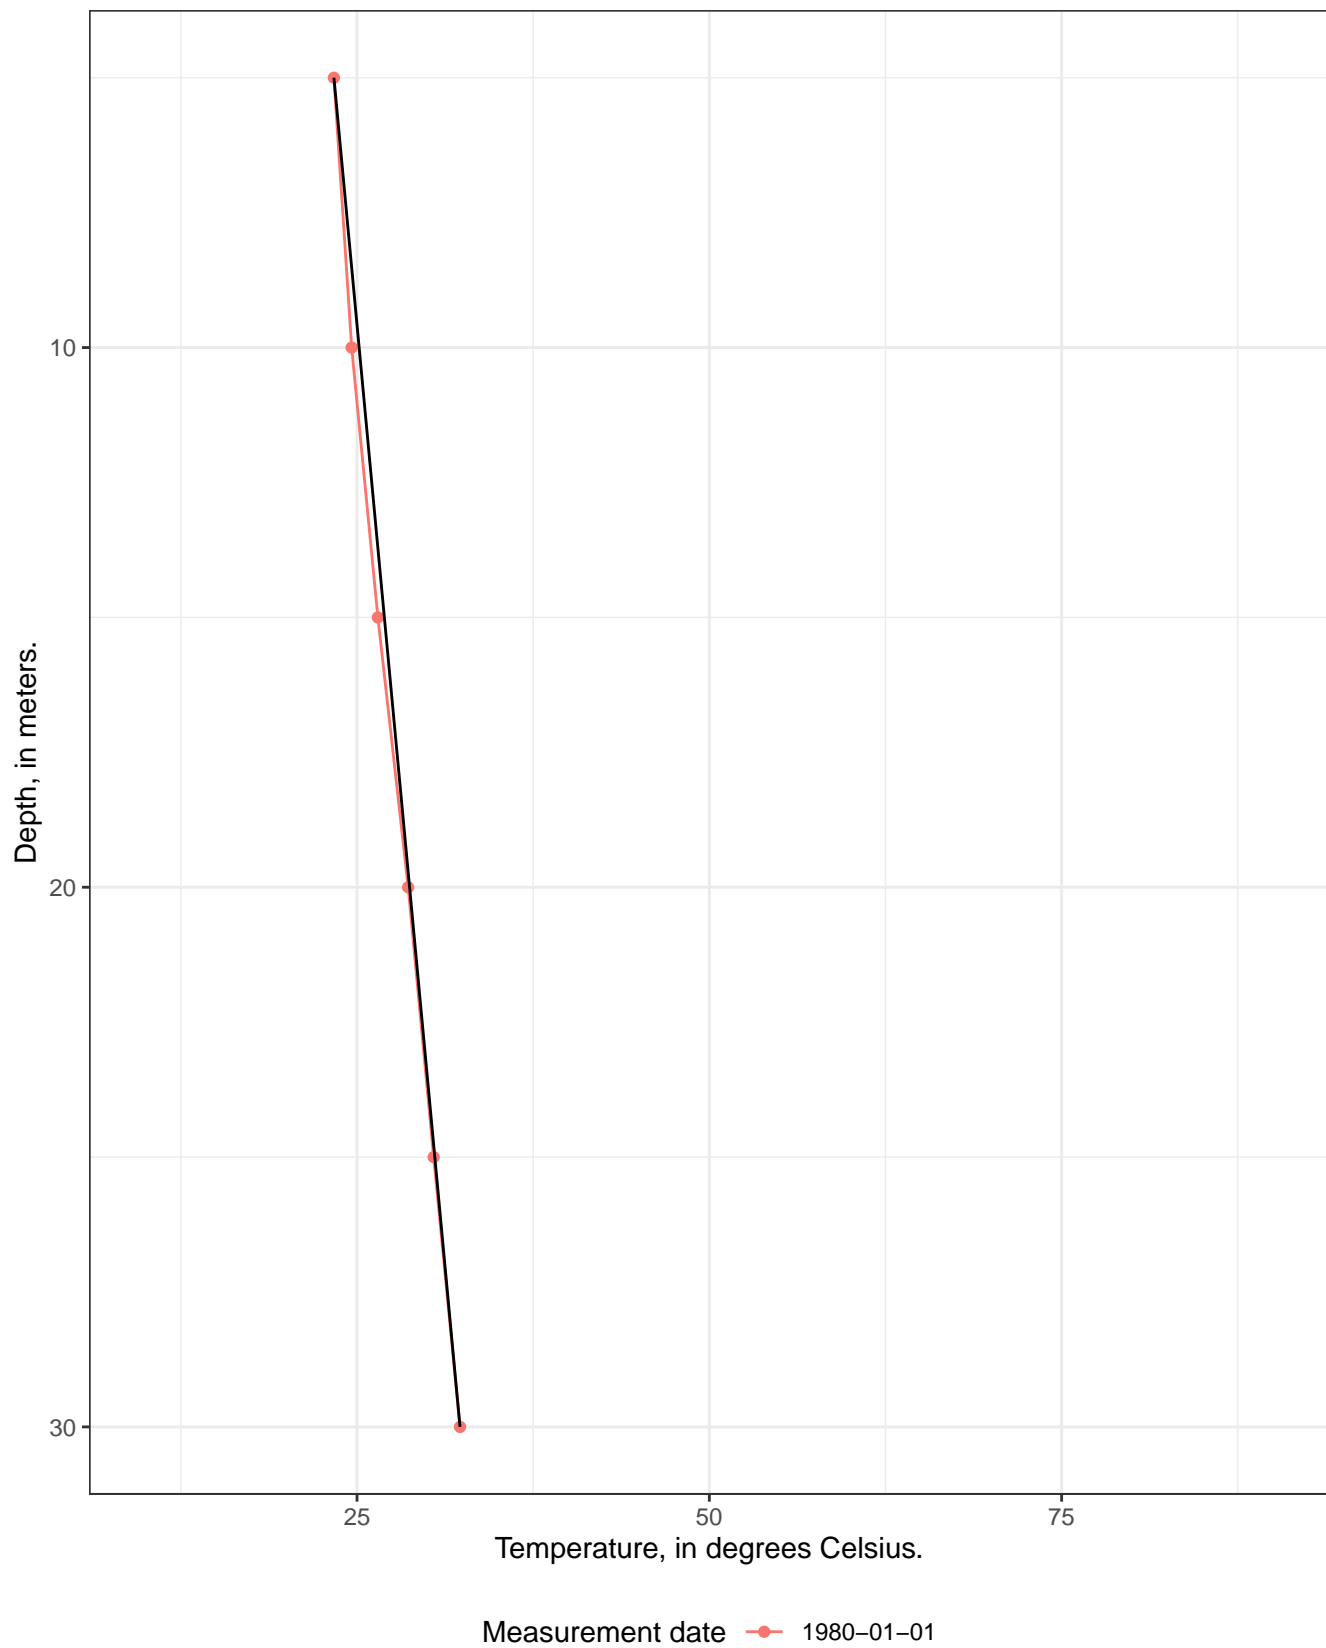

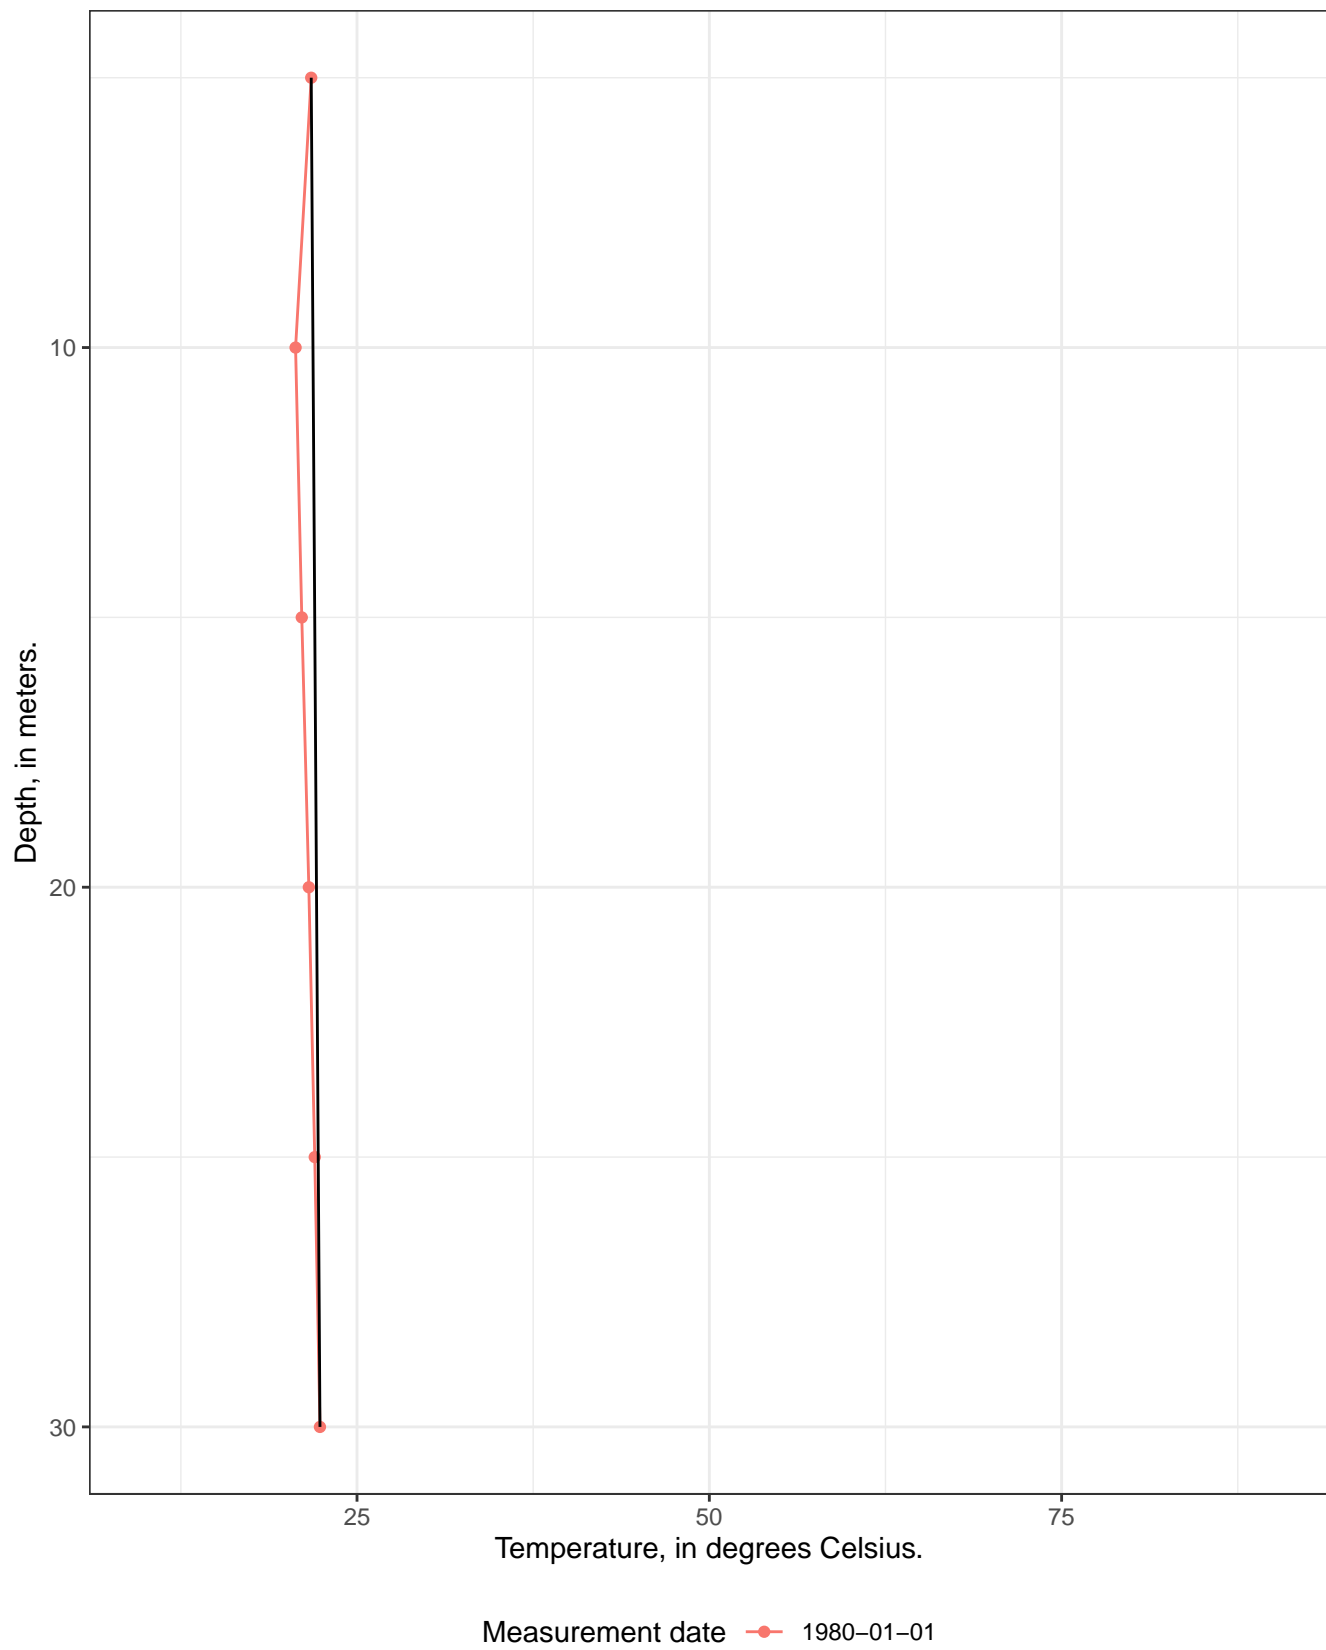

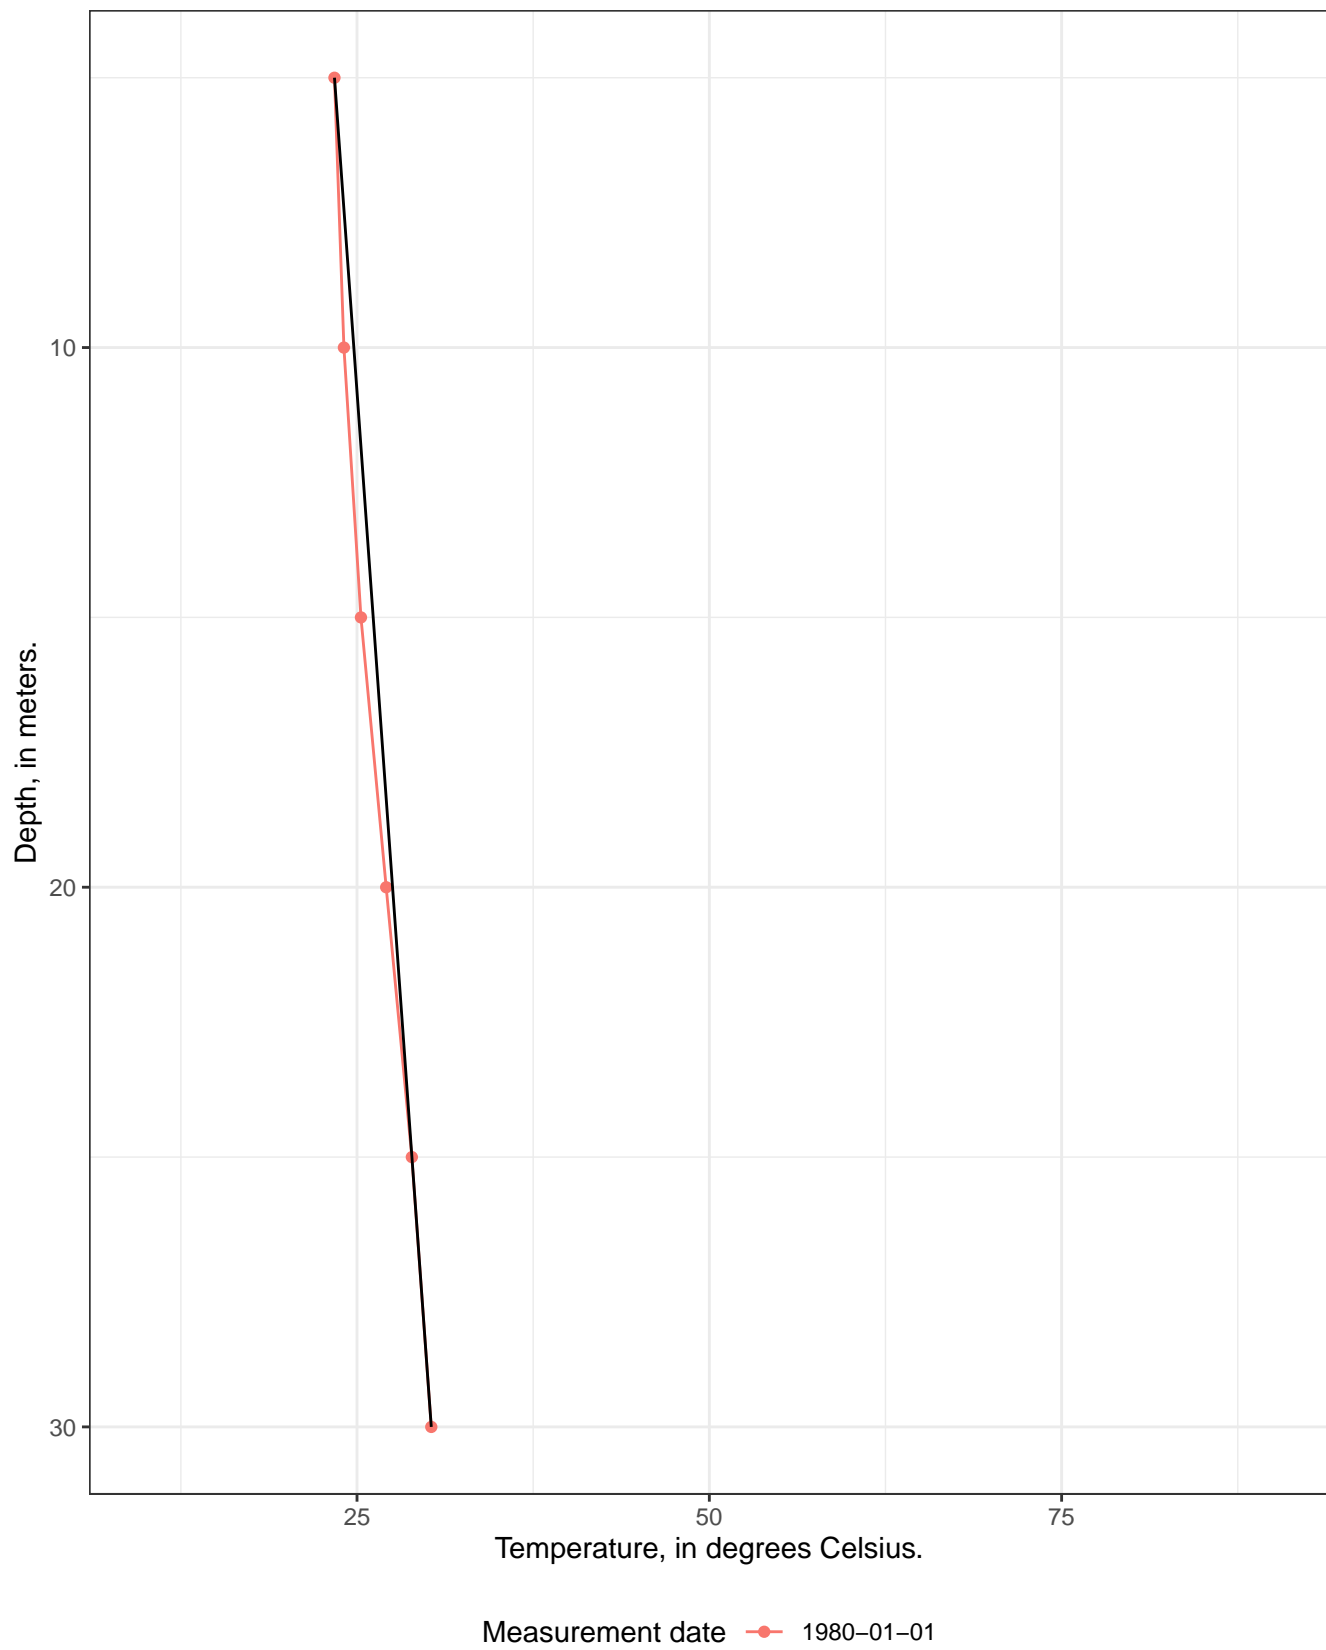



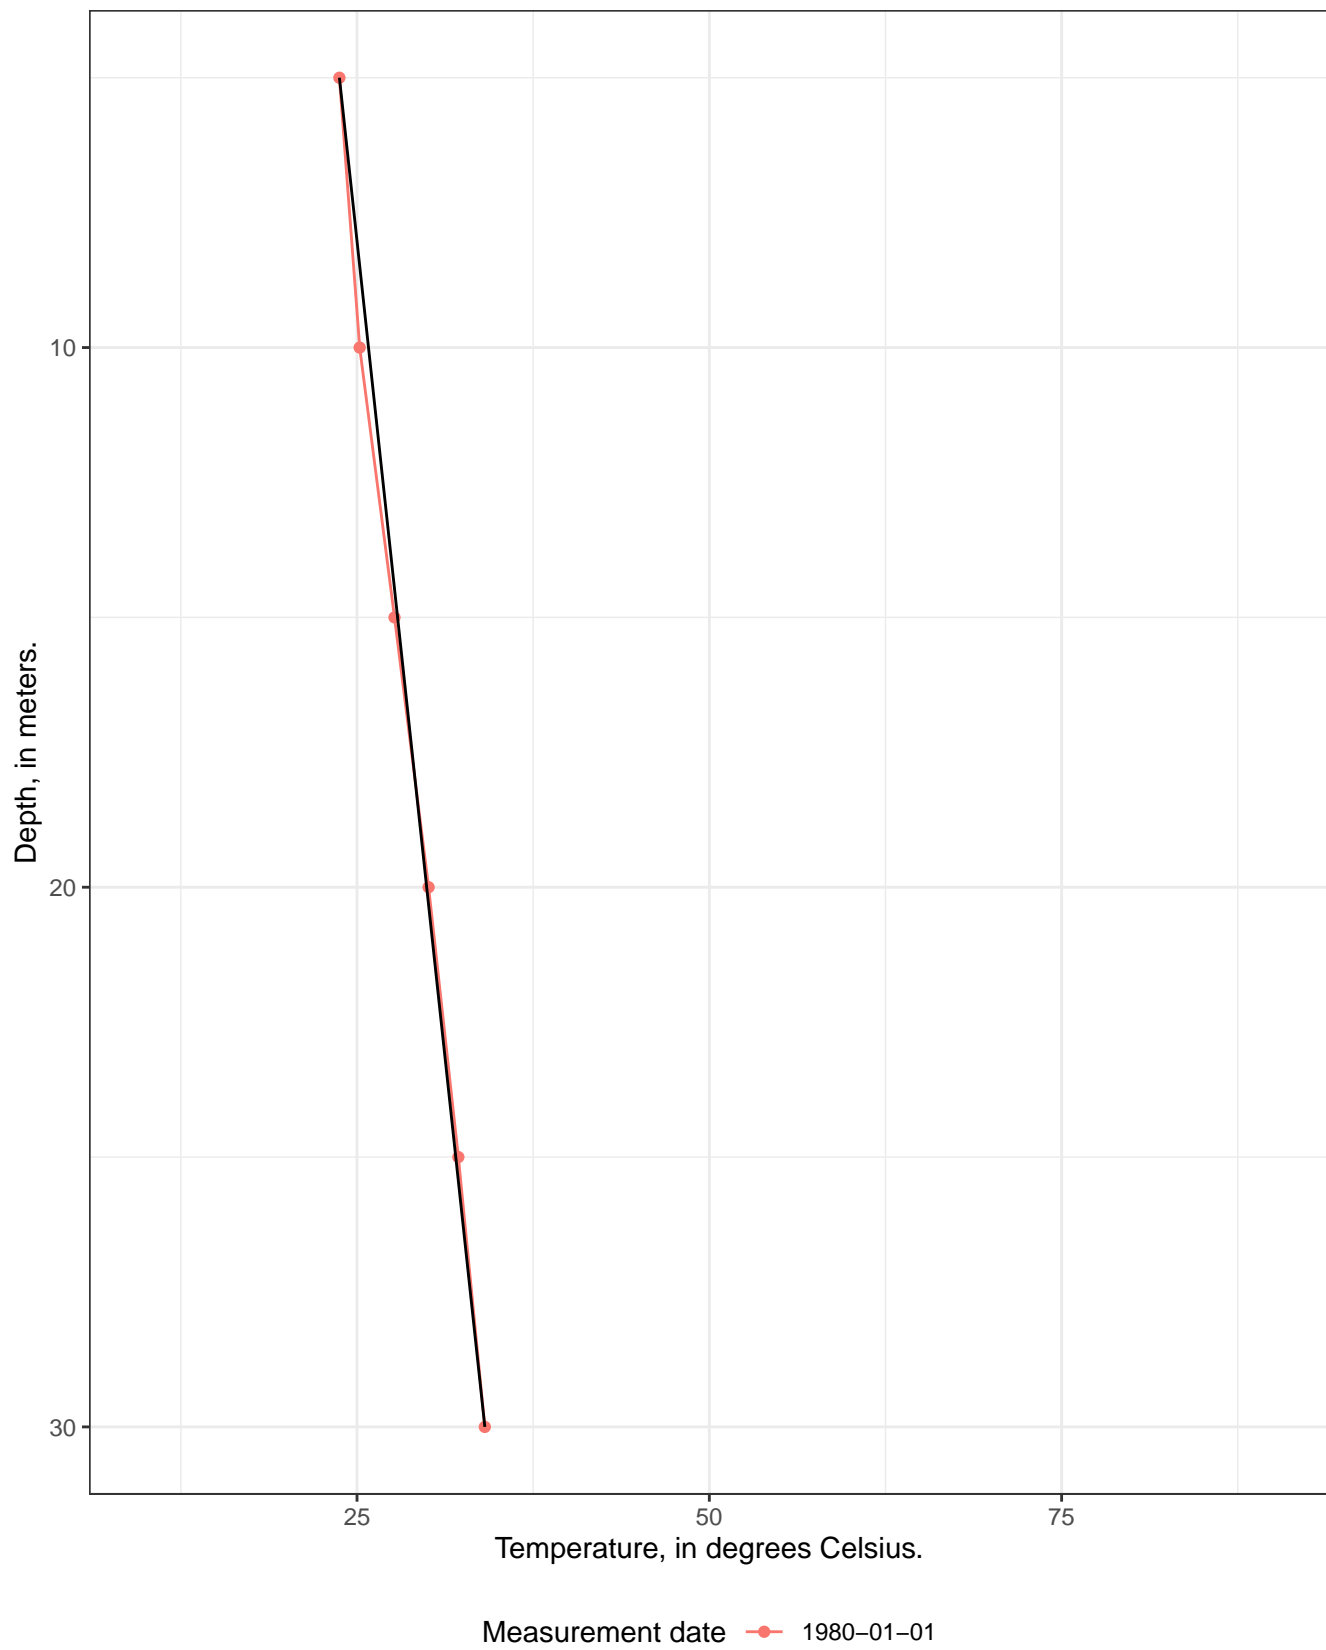

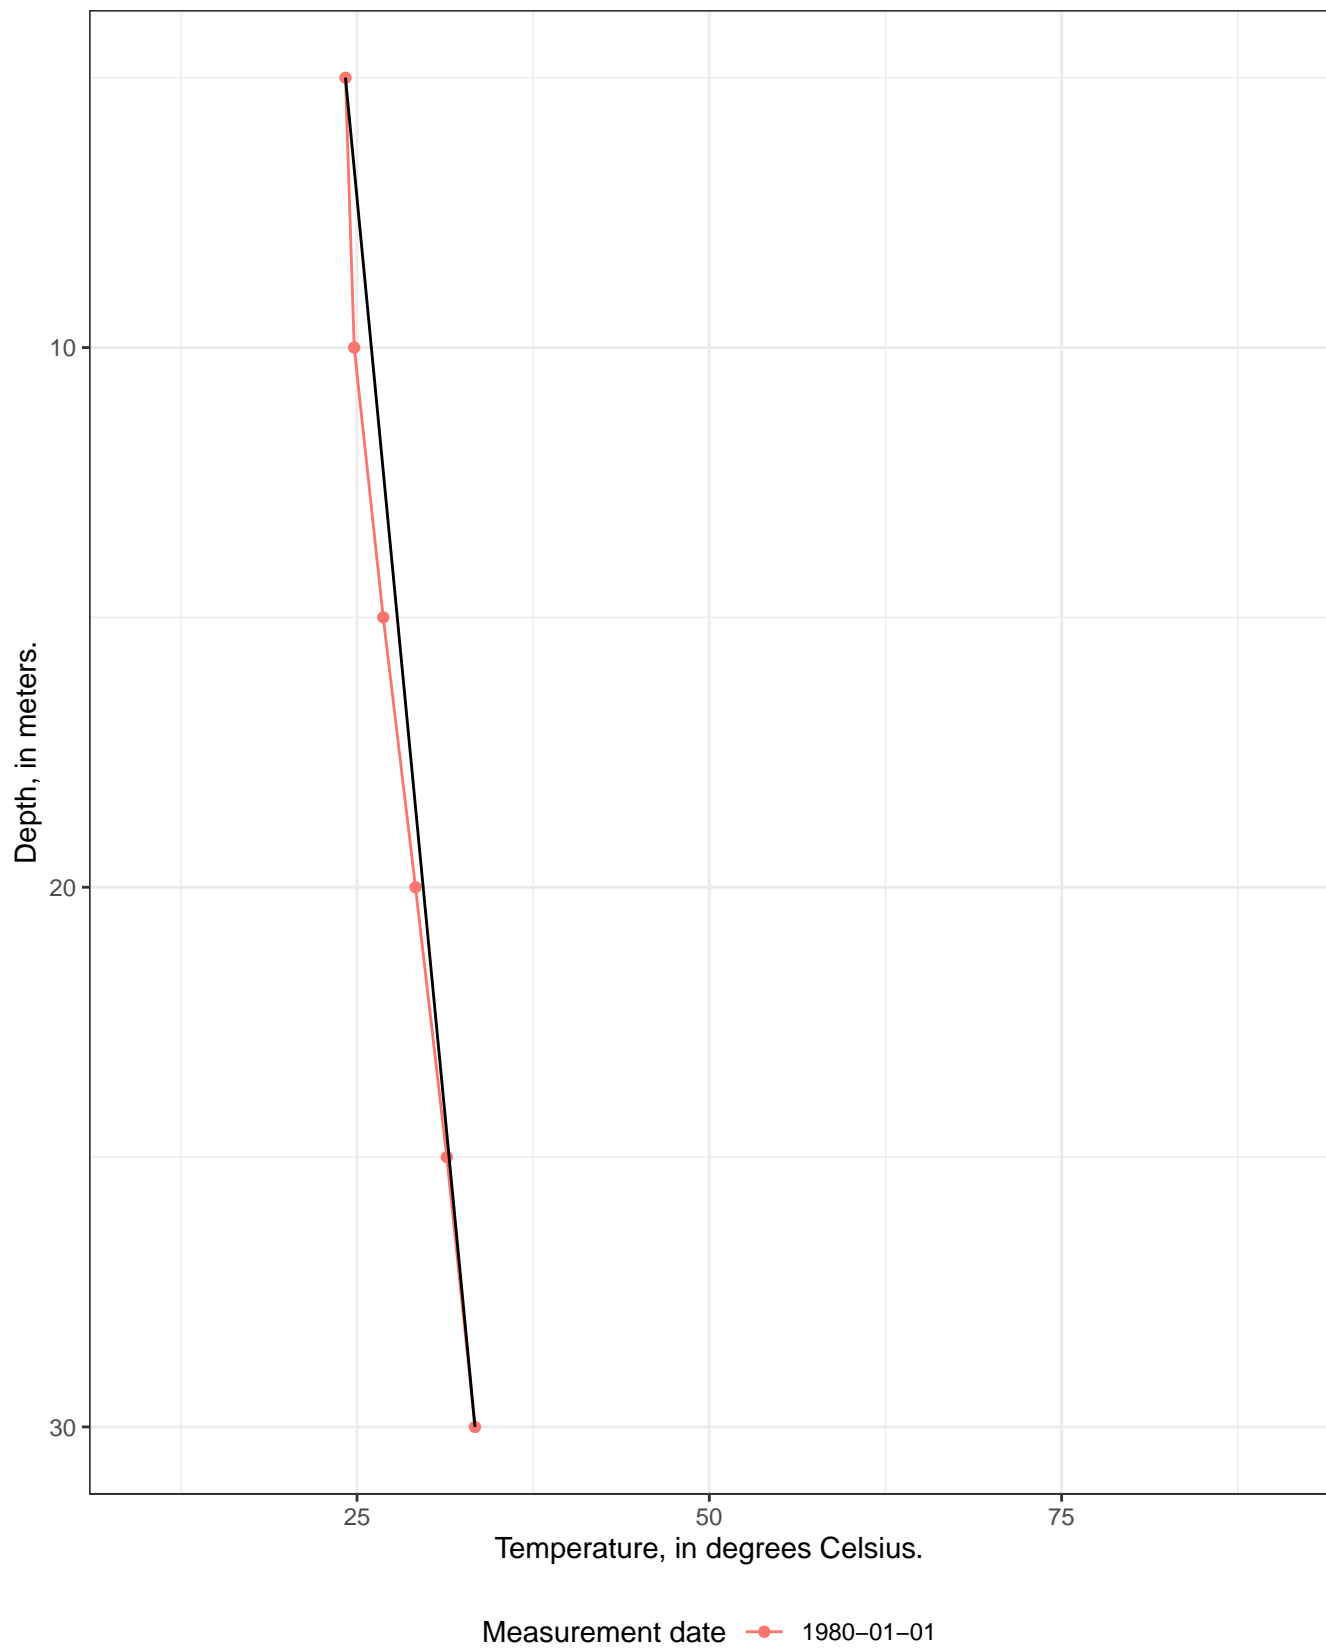

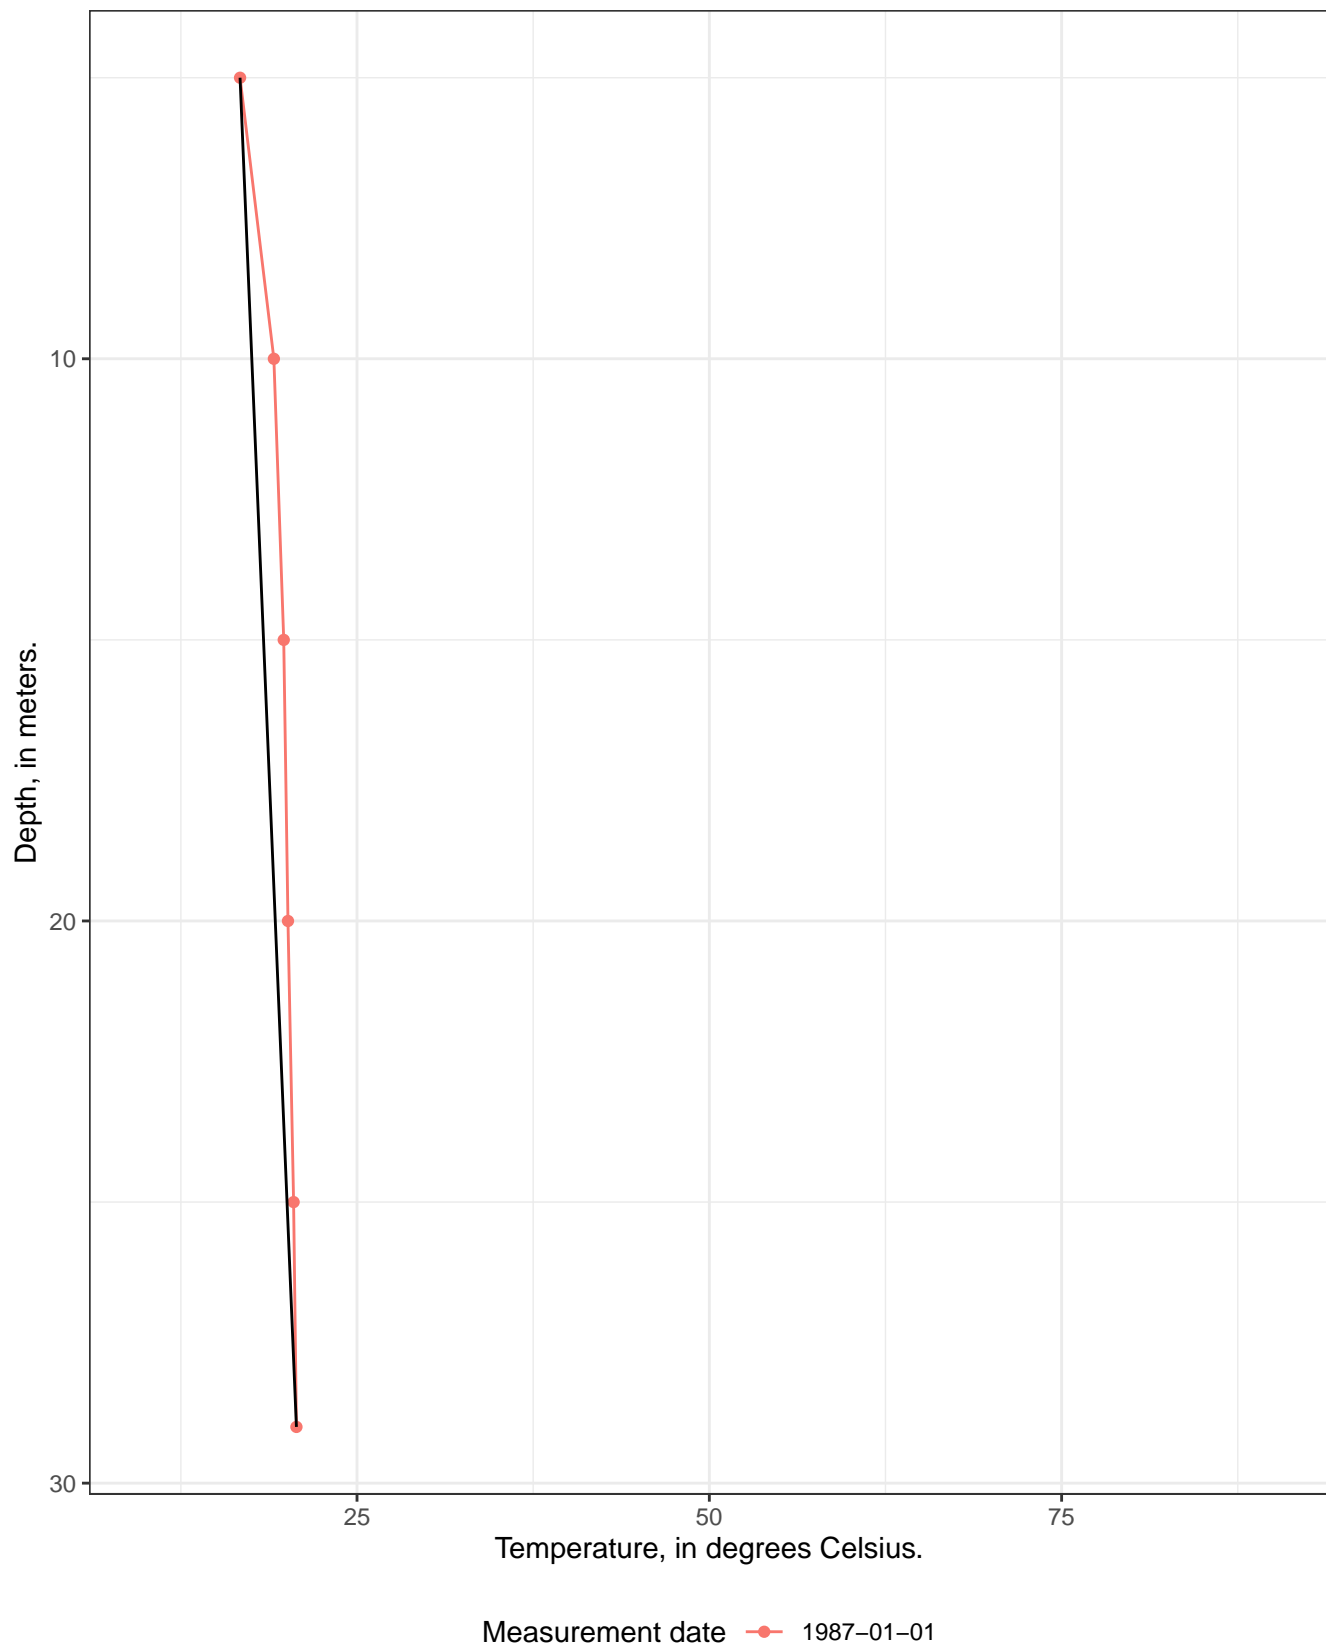

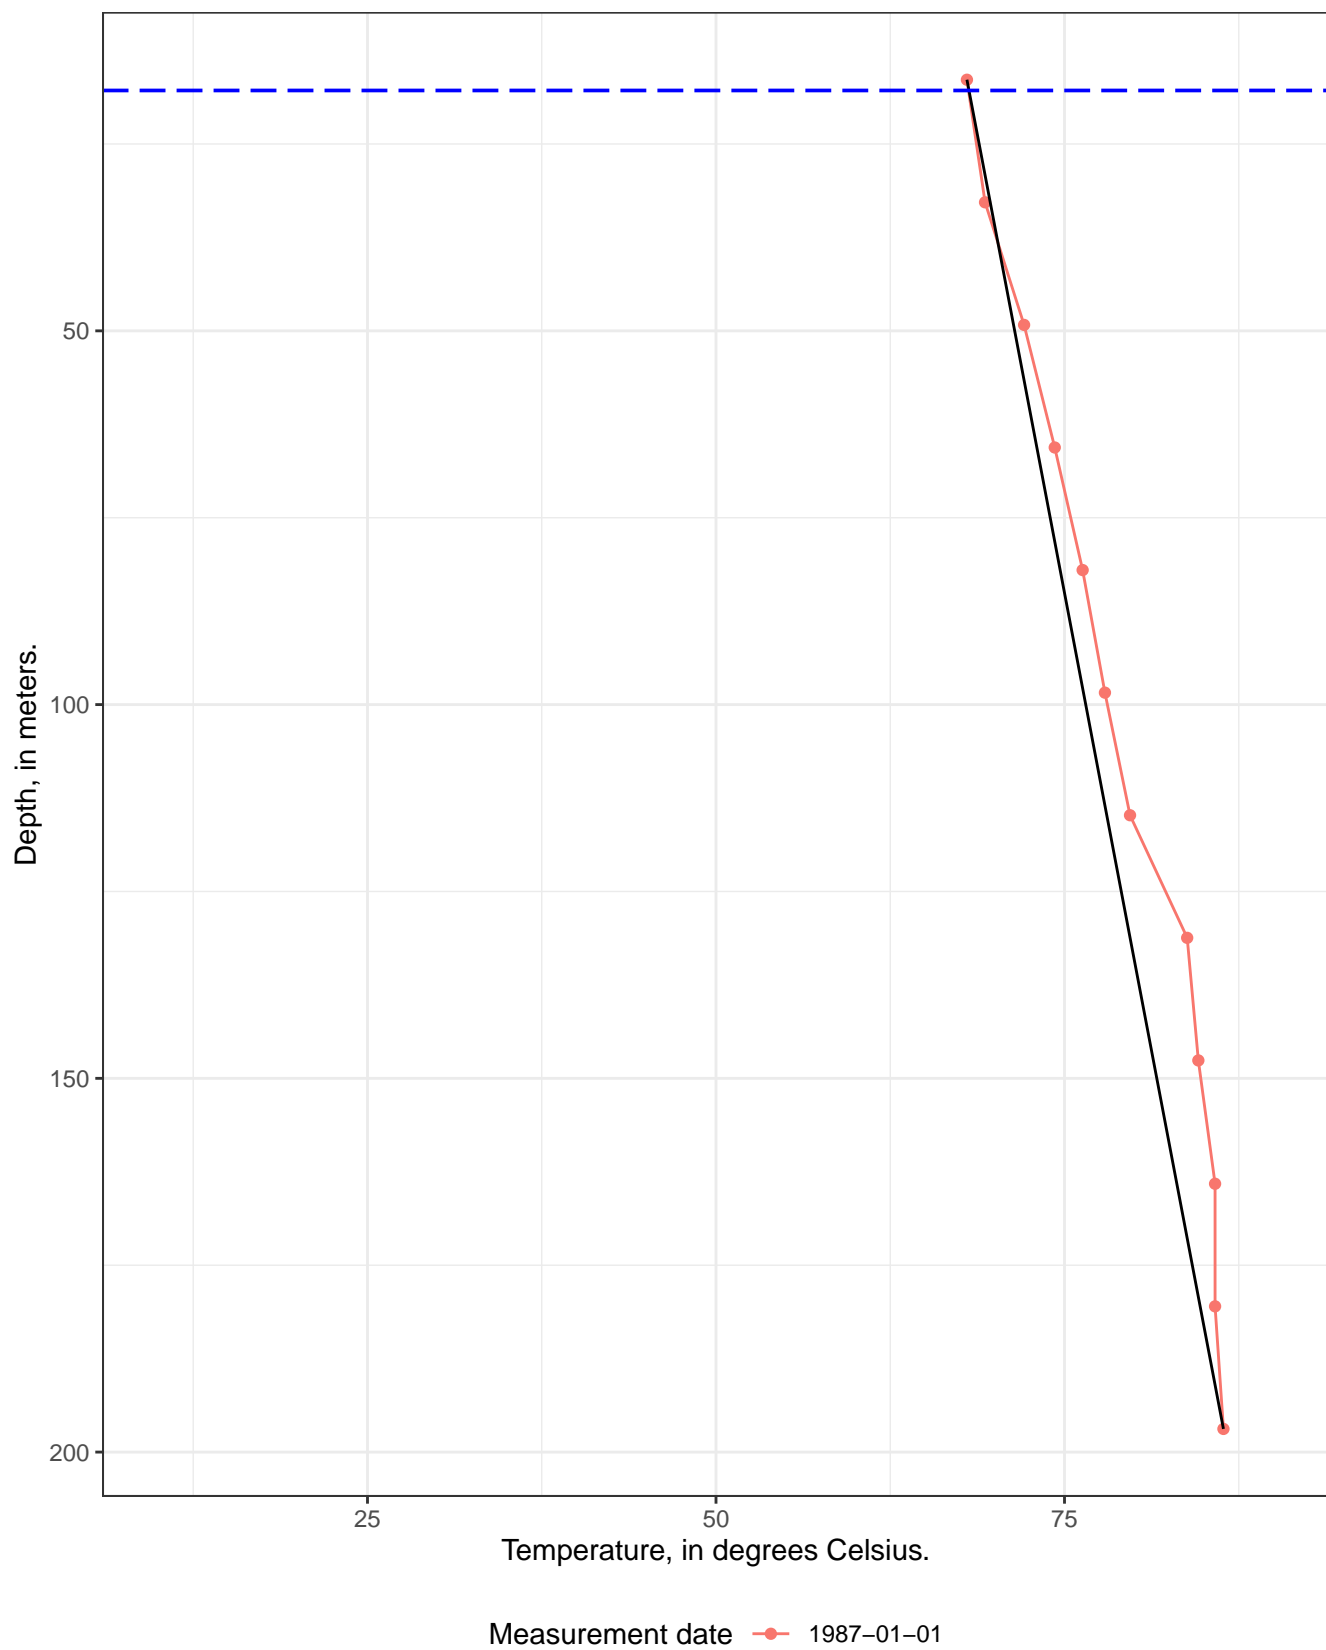

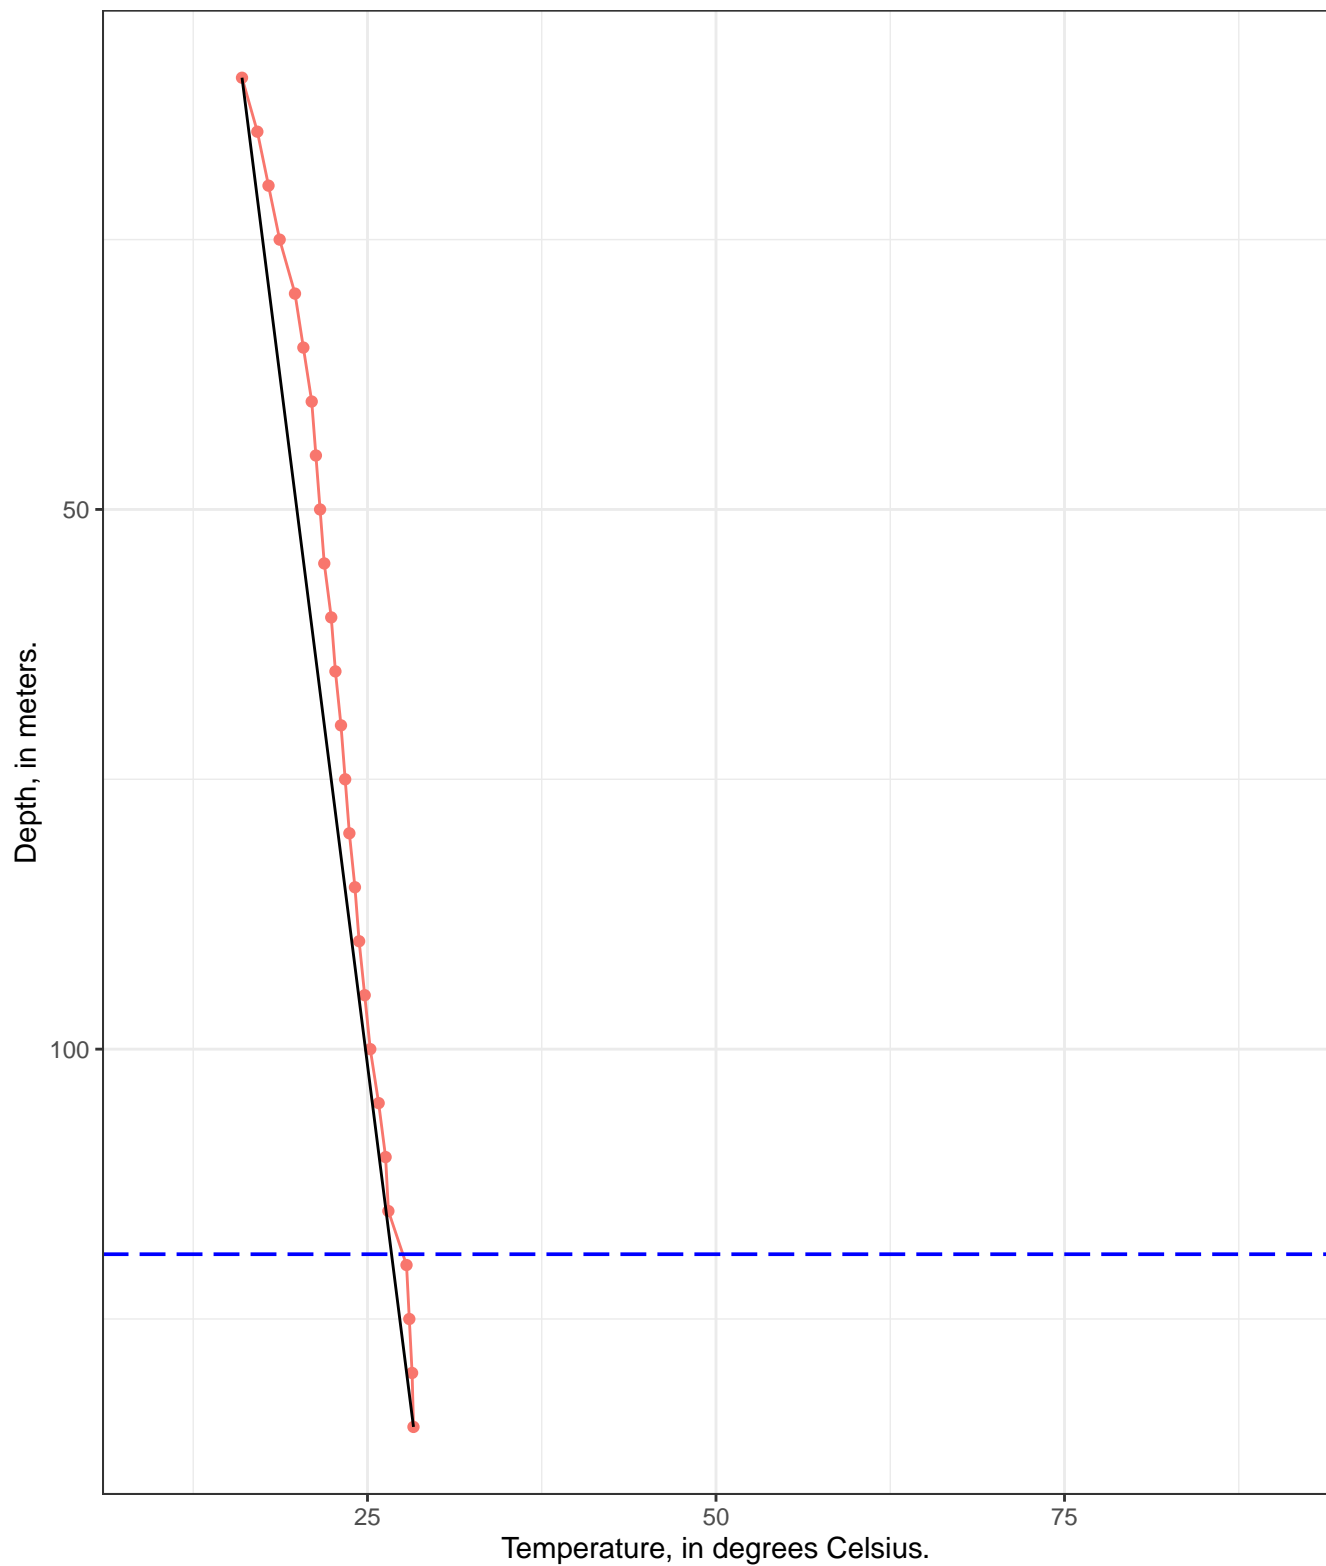

ID: 373 [WSMR-B-21]

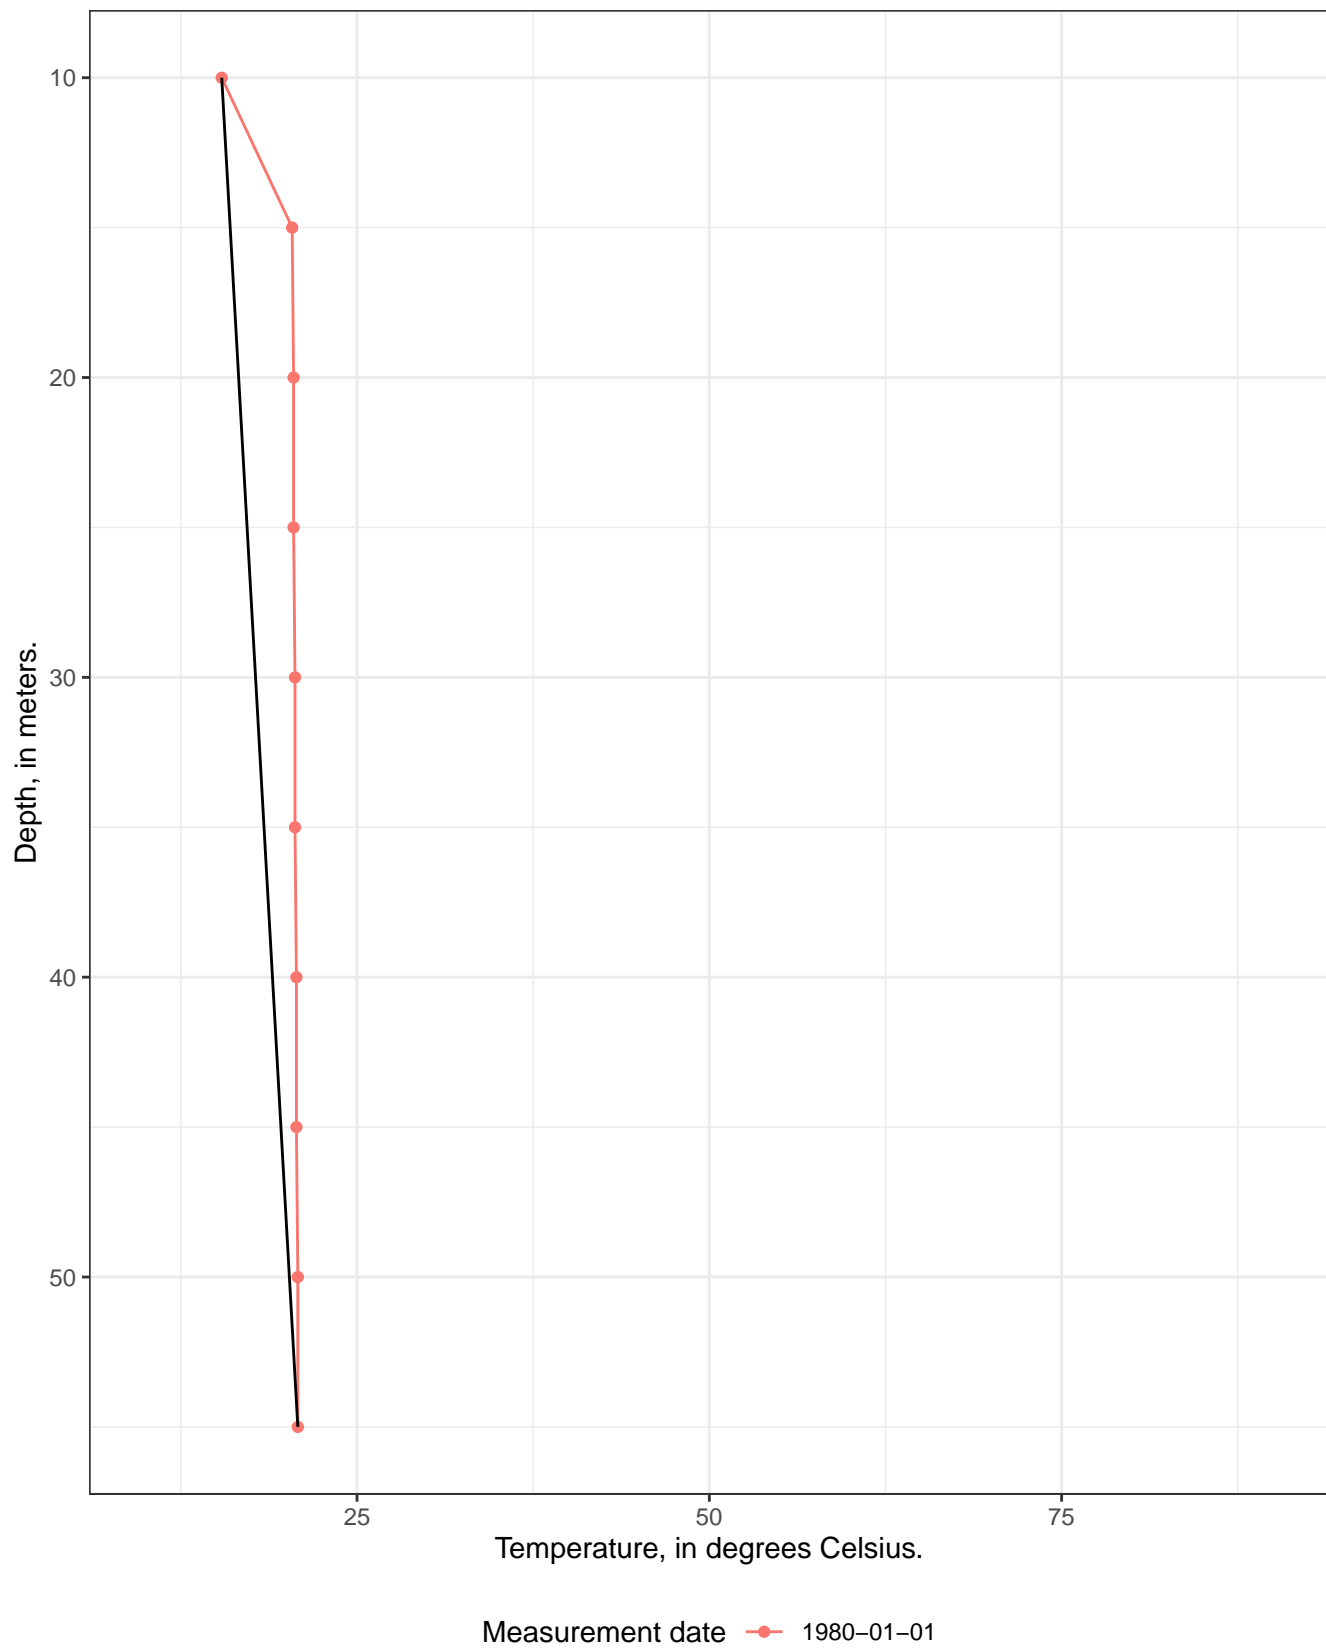

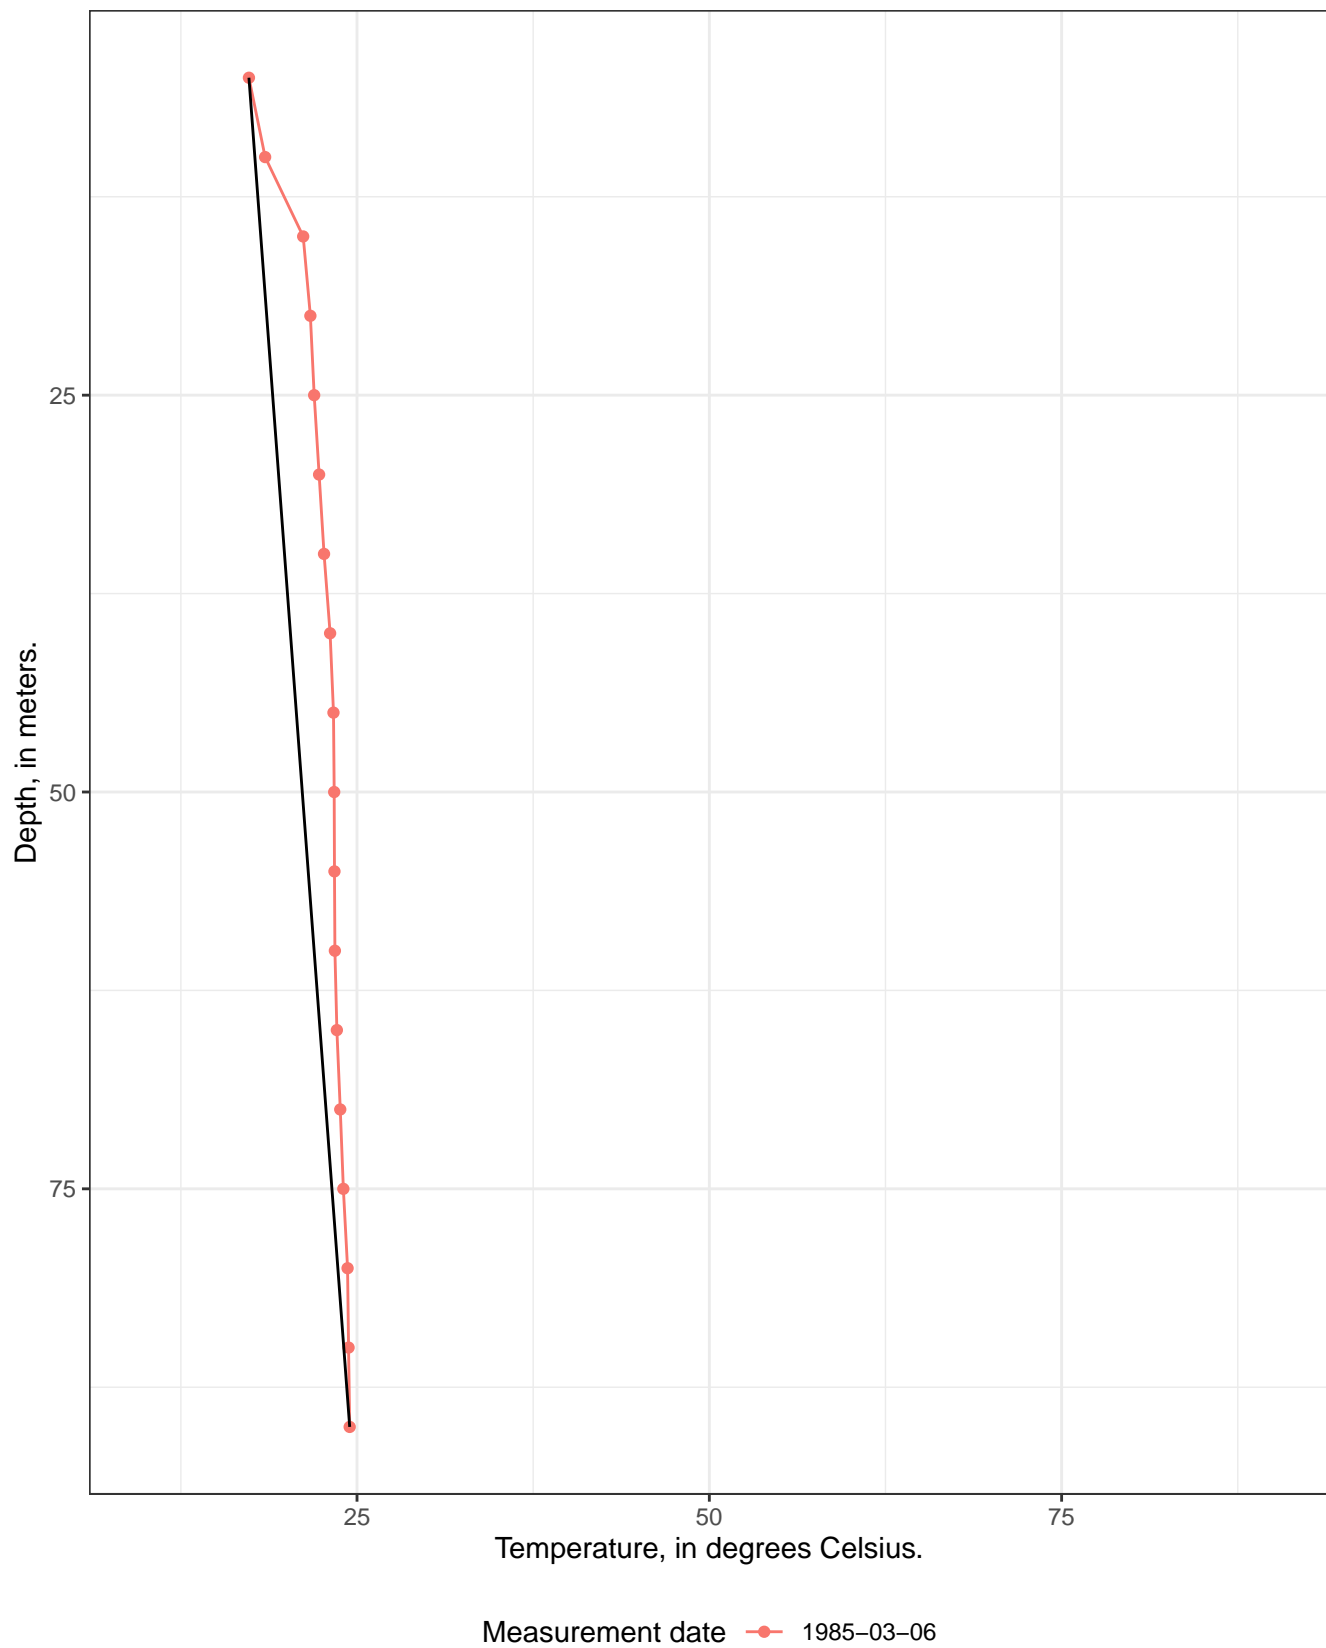

ID: 375 [WSMR-HBNM-1]

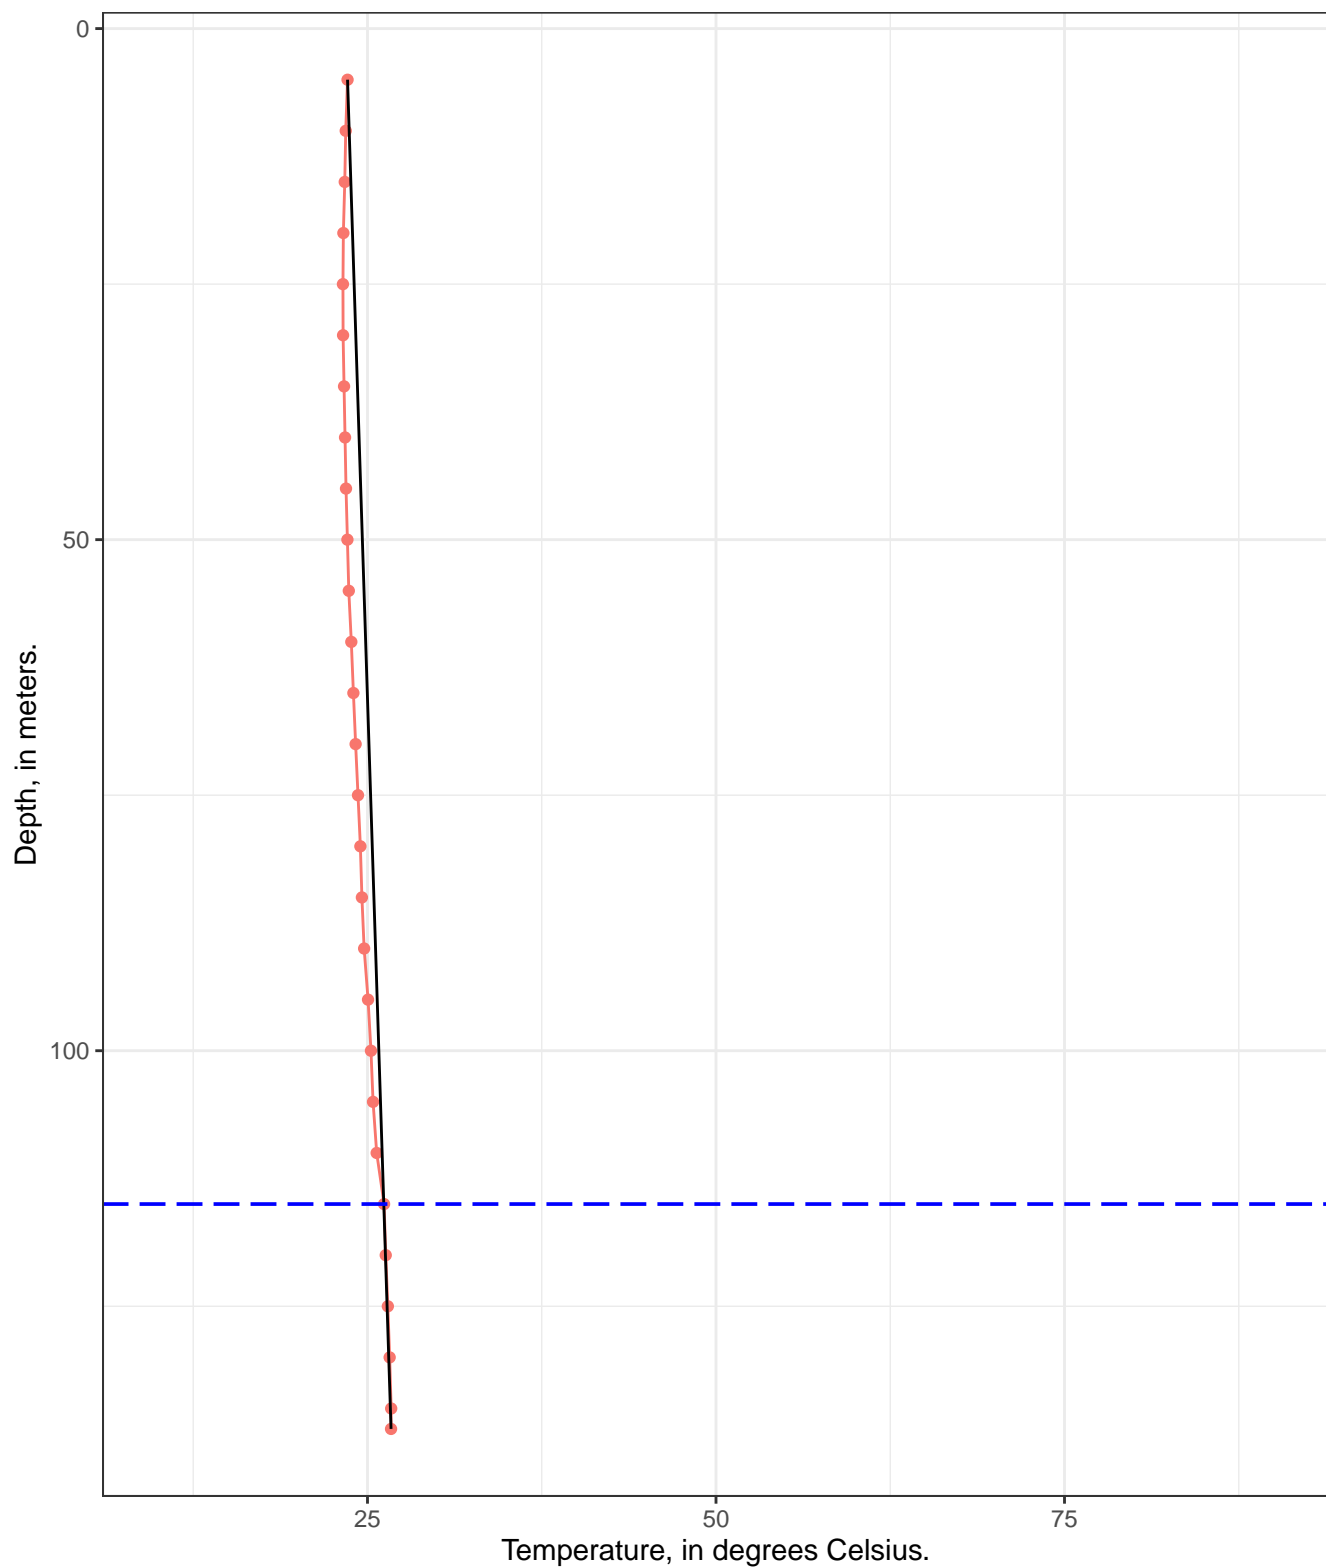



ID: 376 [WSMR-K-14]

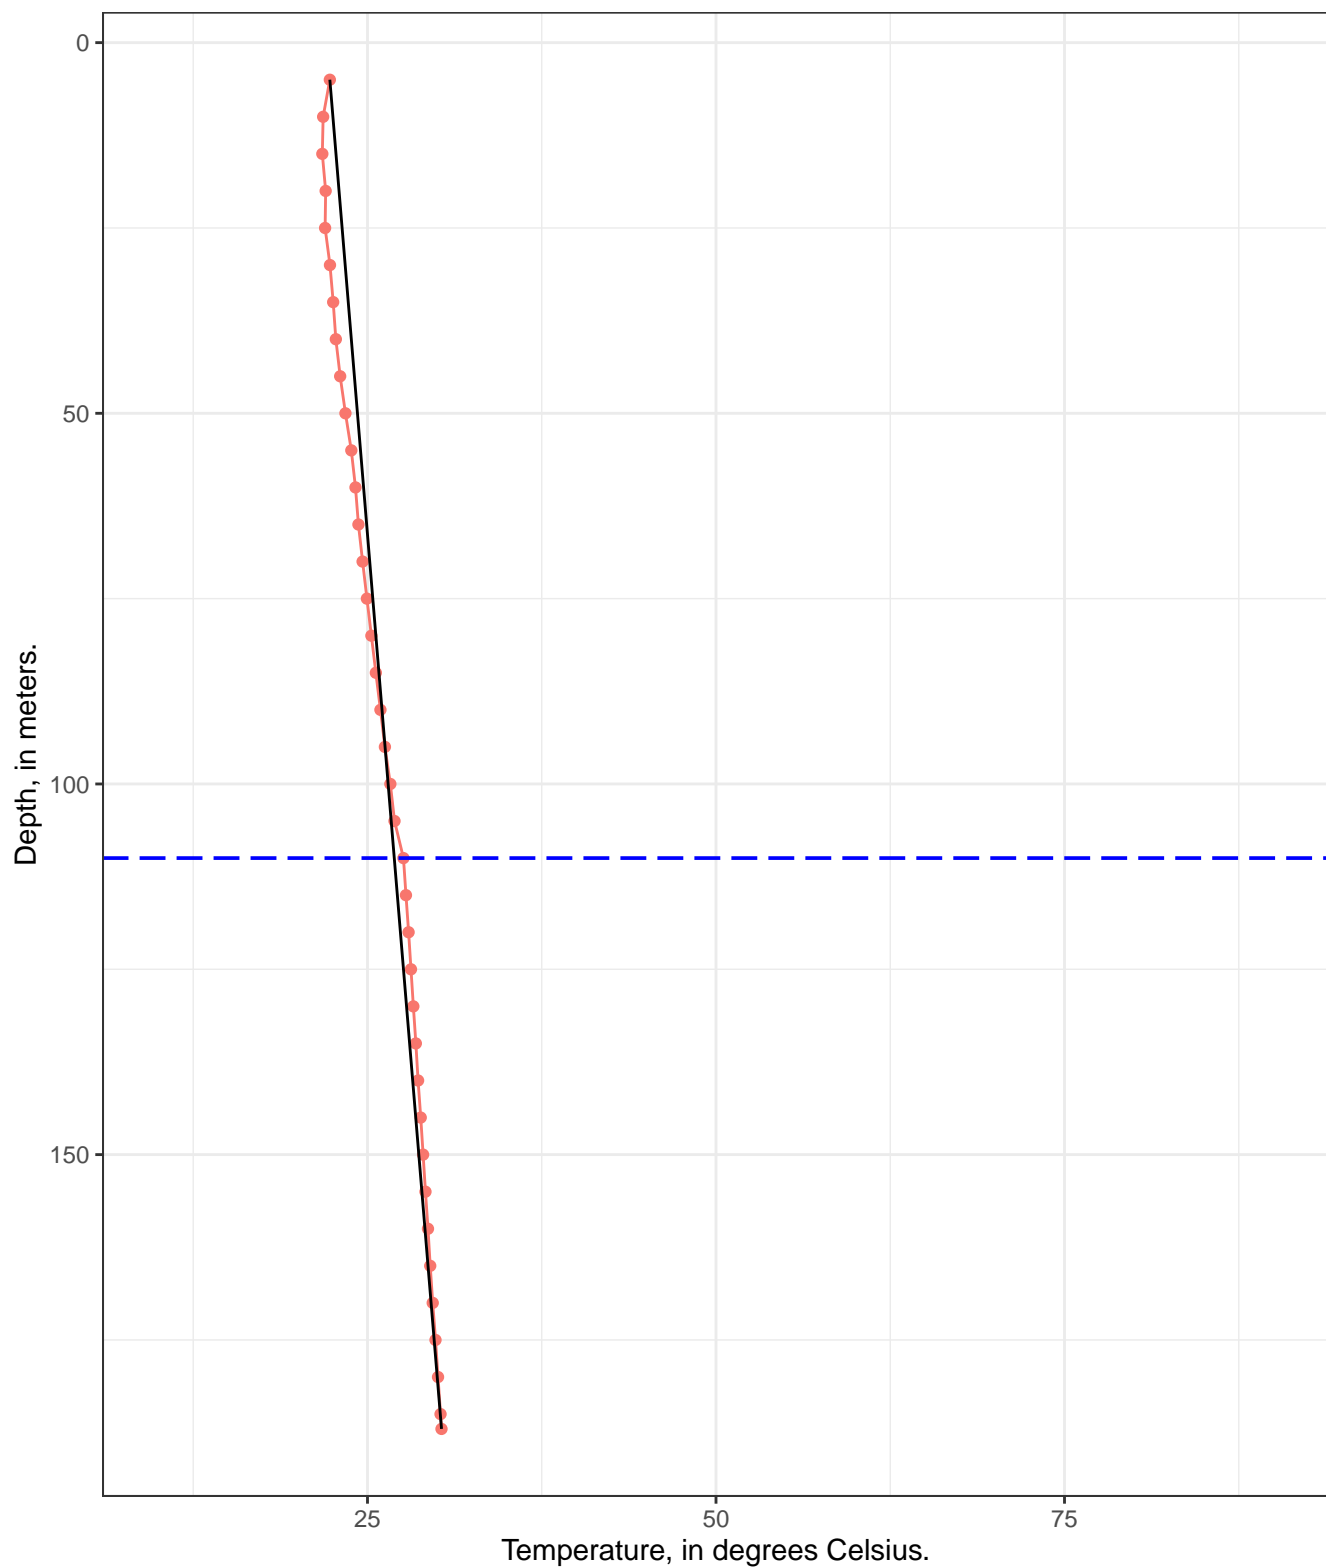

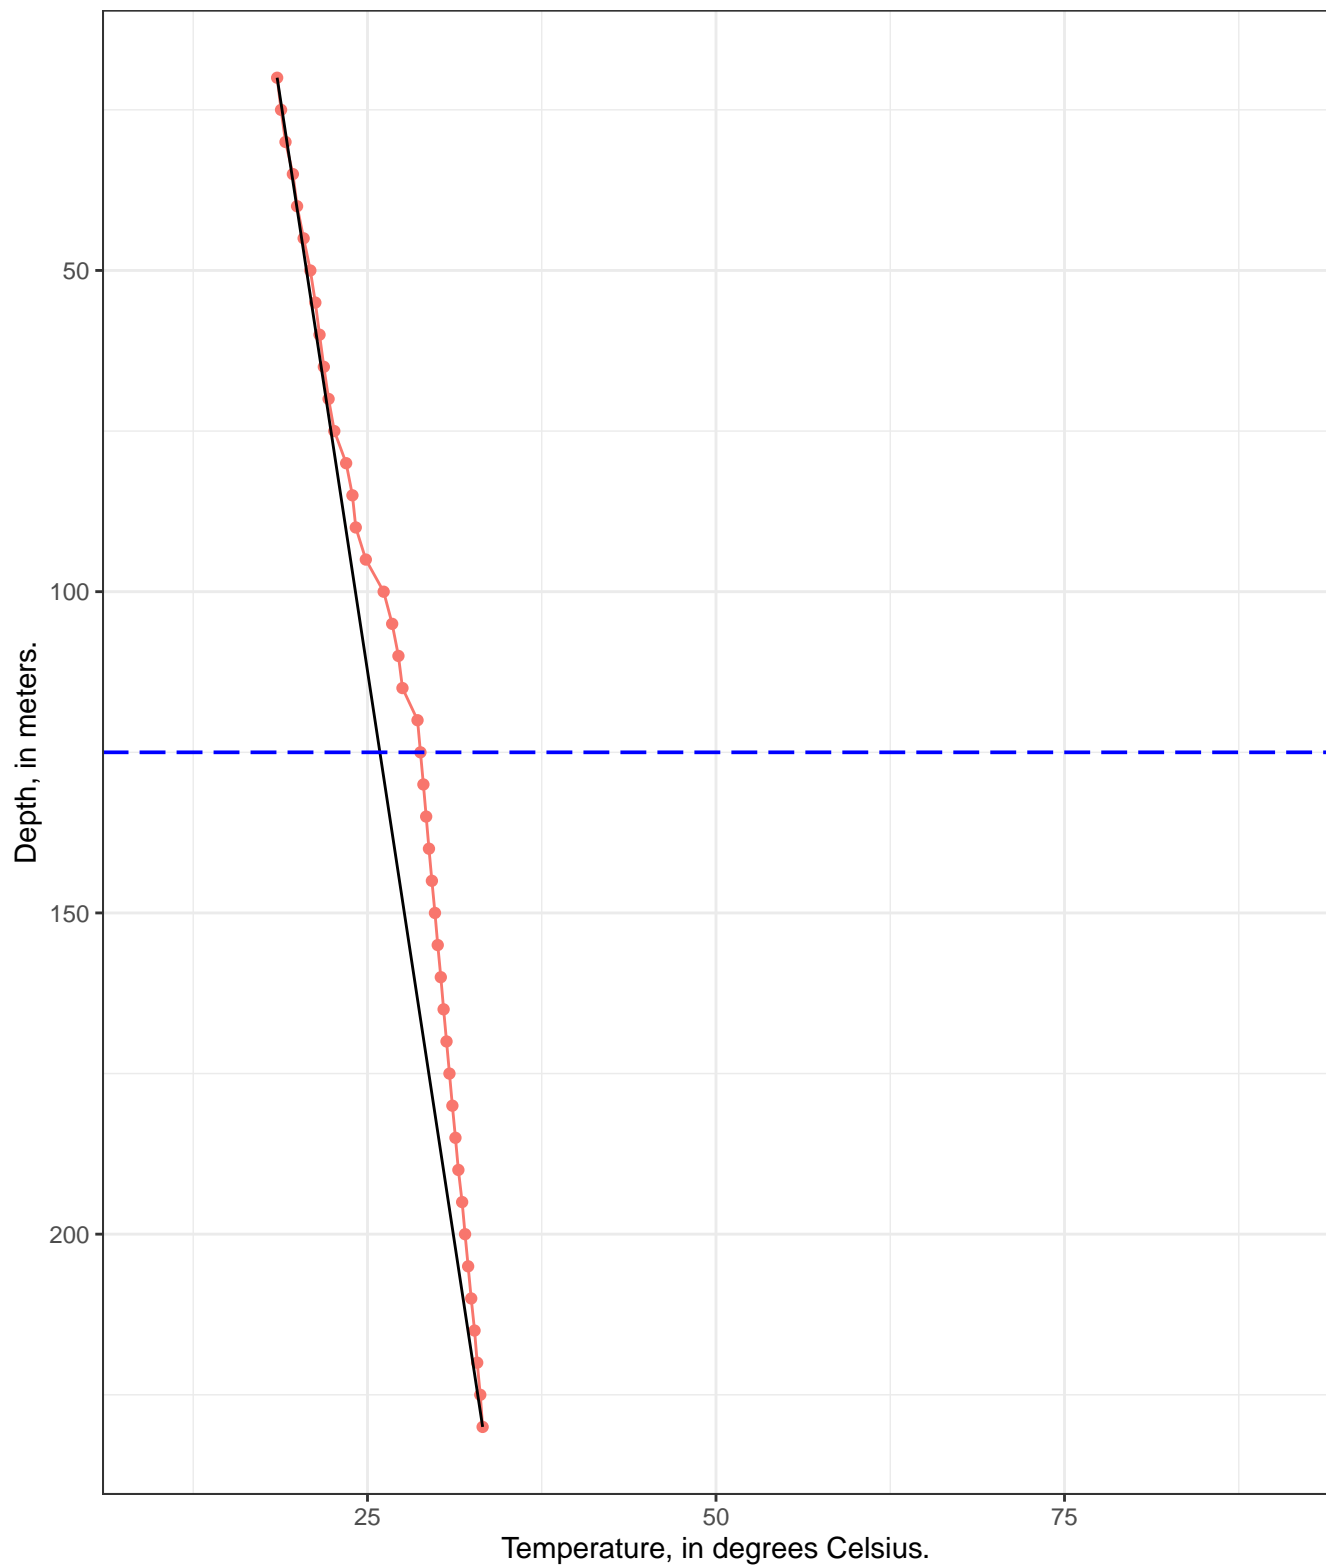

ID: 378 [WSMR-OS-12]

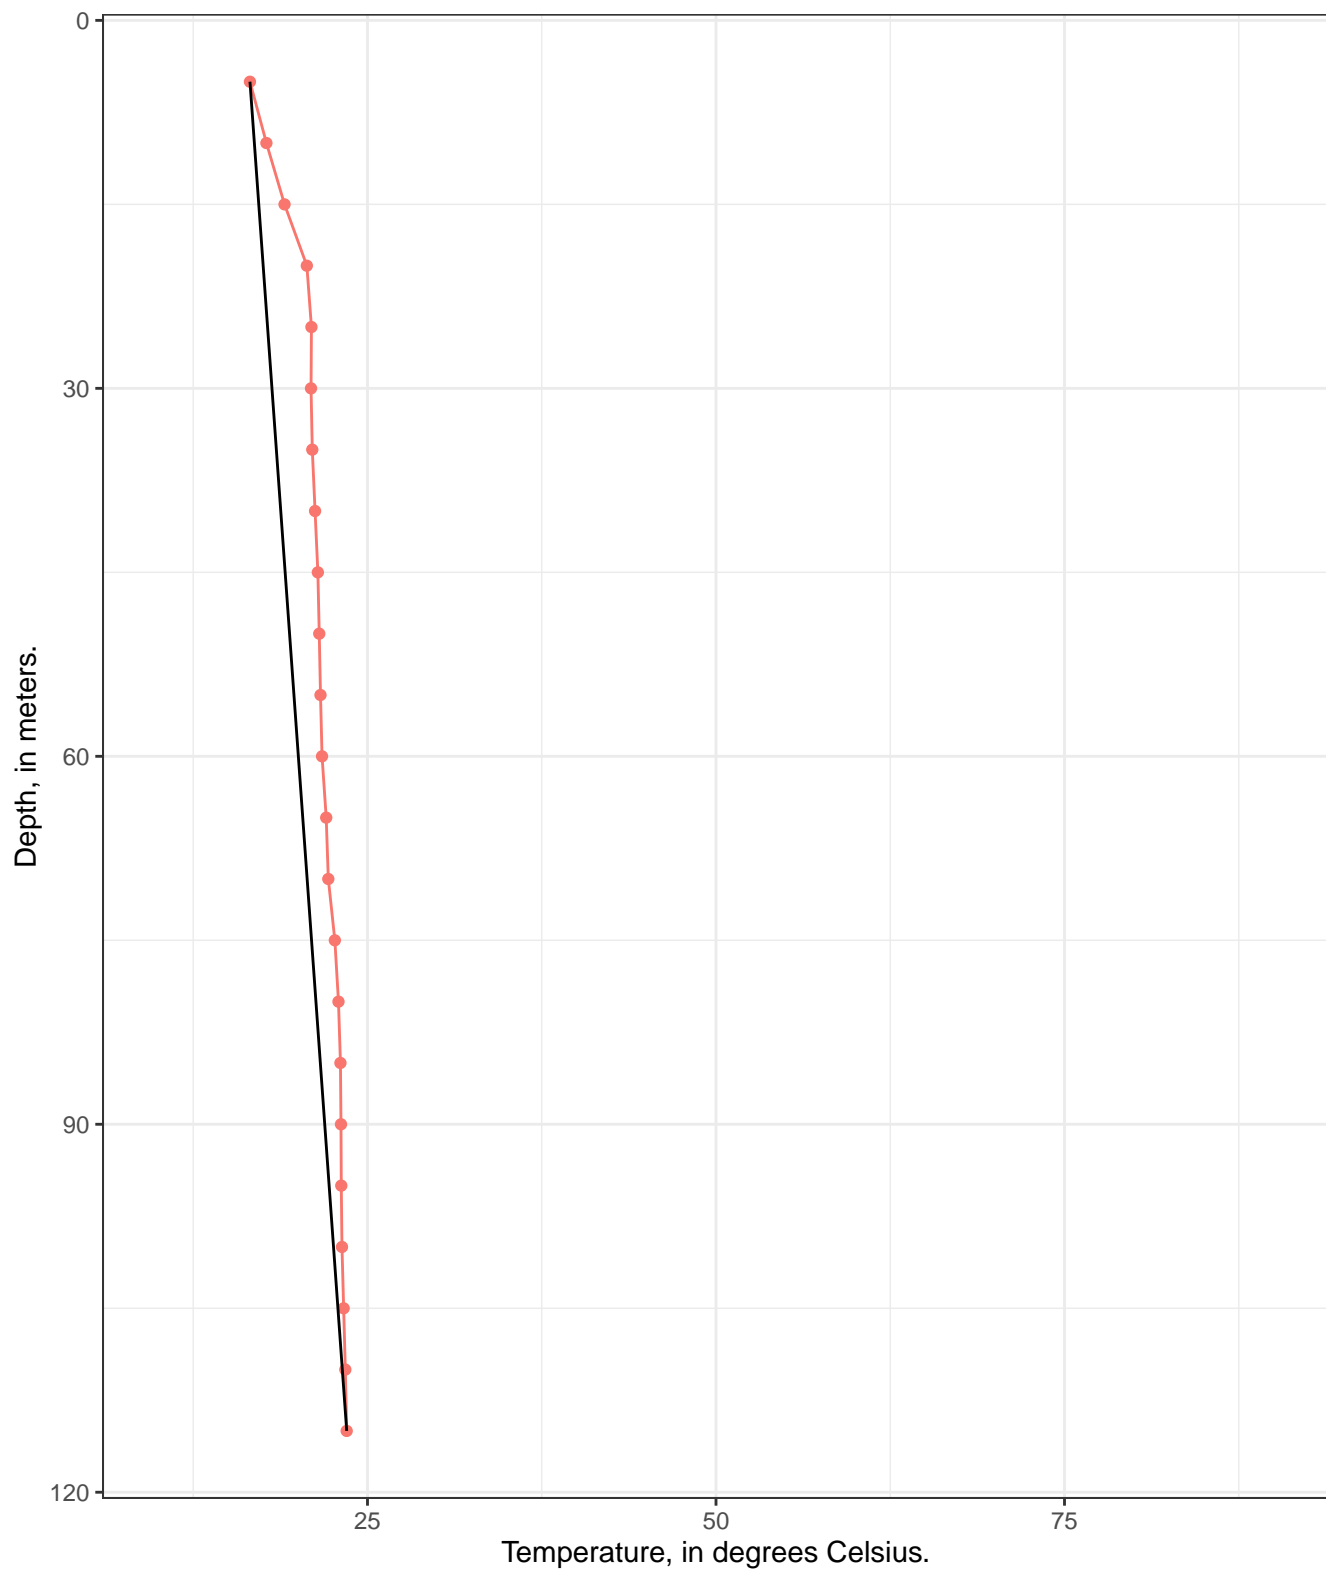

ID: 379 [WSMR-T-6]

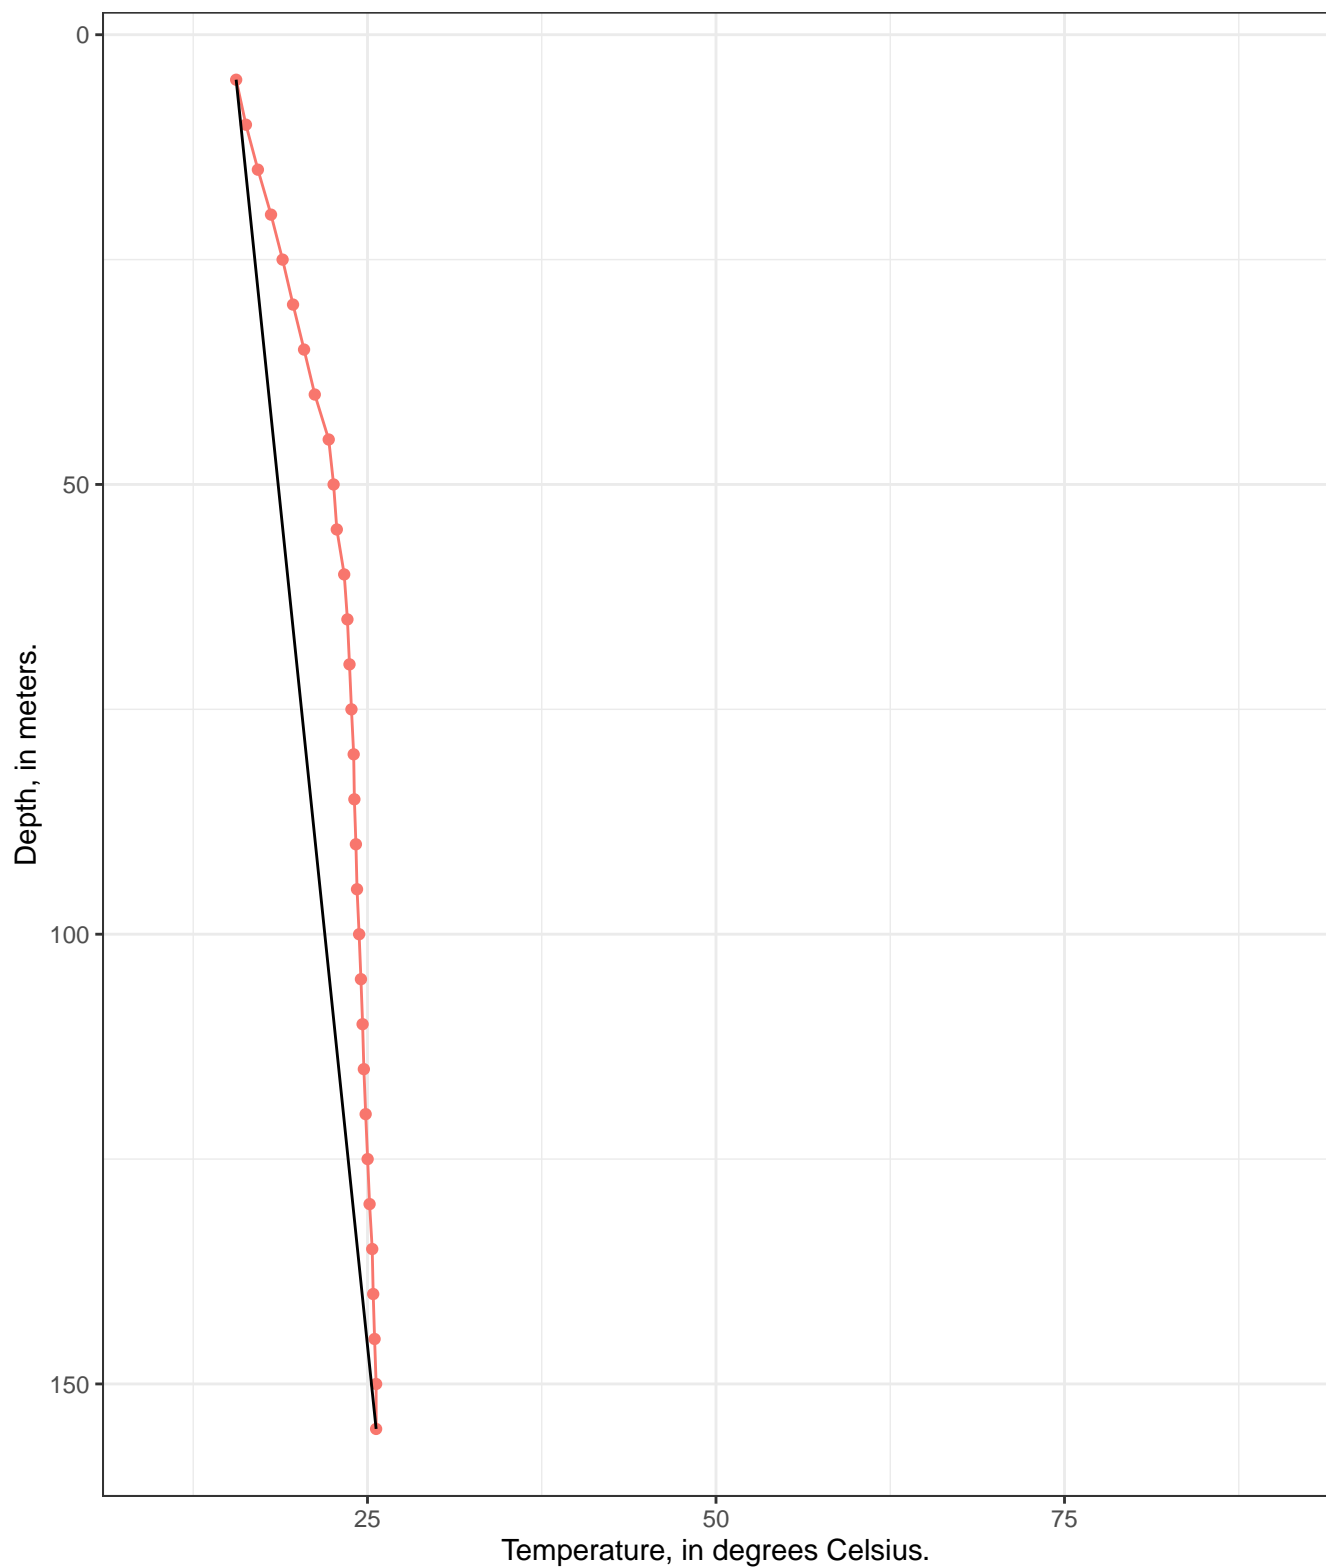

Supplement: s1 [file s1]
