# Supplementary material for: Salinity Contributions from Geothermal Waters to the Rio Grande and Shallow Aquifer System in the Transboundary Mesilla (United States)/Conejos-Médanos (Mexico) Basin
Source: MDPI journal article supplement (doi:10.3390/w14010033), 2021-12-23
Supplement: s1 [file s1]

Figure S2. Plots of smoothed profiles and derivatives for measurements made below estimated water-table elevations.

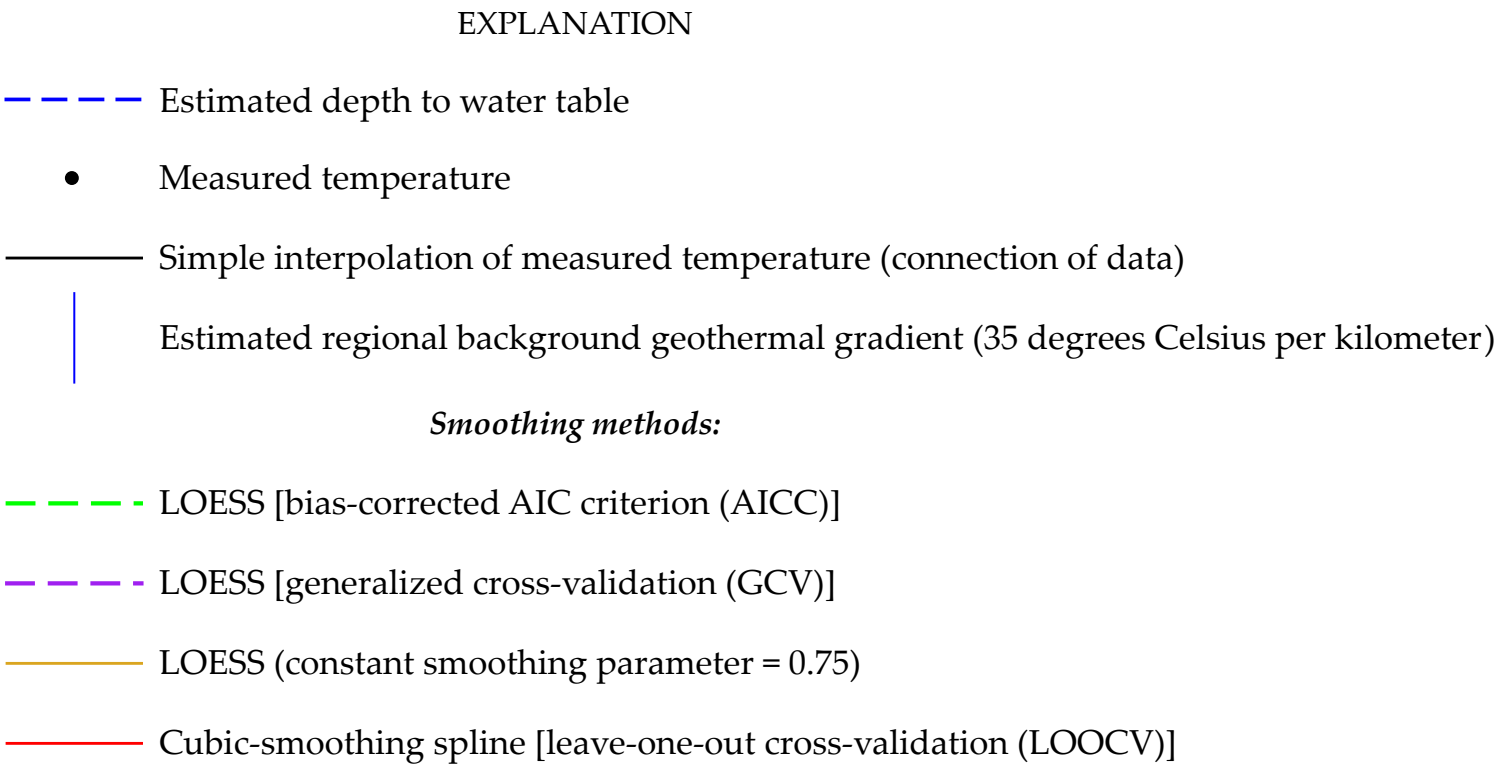

Citations for smoothing methods provided in main text. LOESS in this case stands for 2<sup>nd</sup>-degree local regression.

ID: 2 [Aden\_Hills] Smoothed Profile

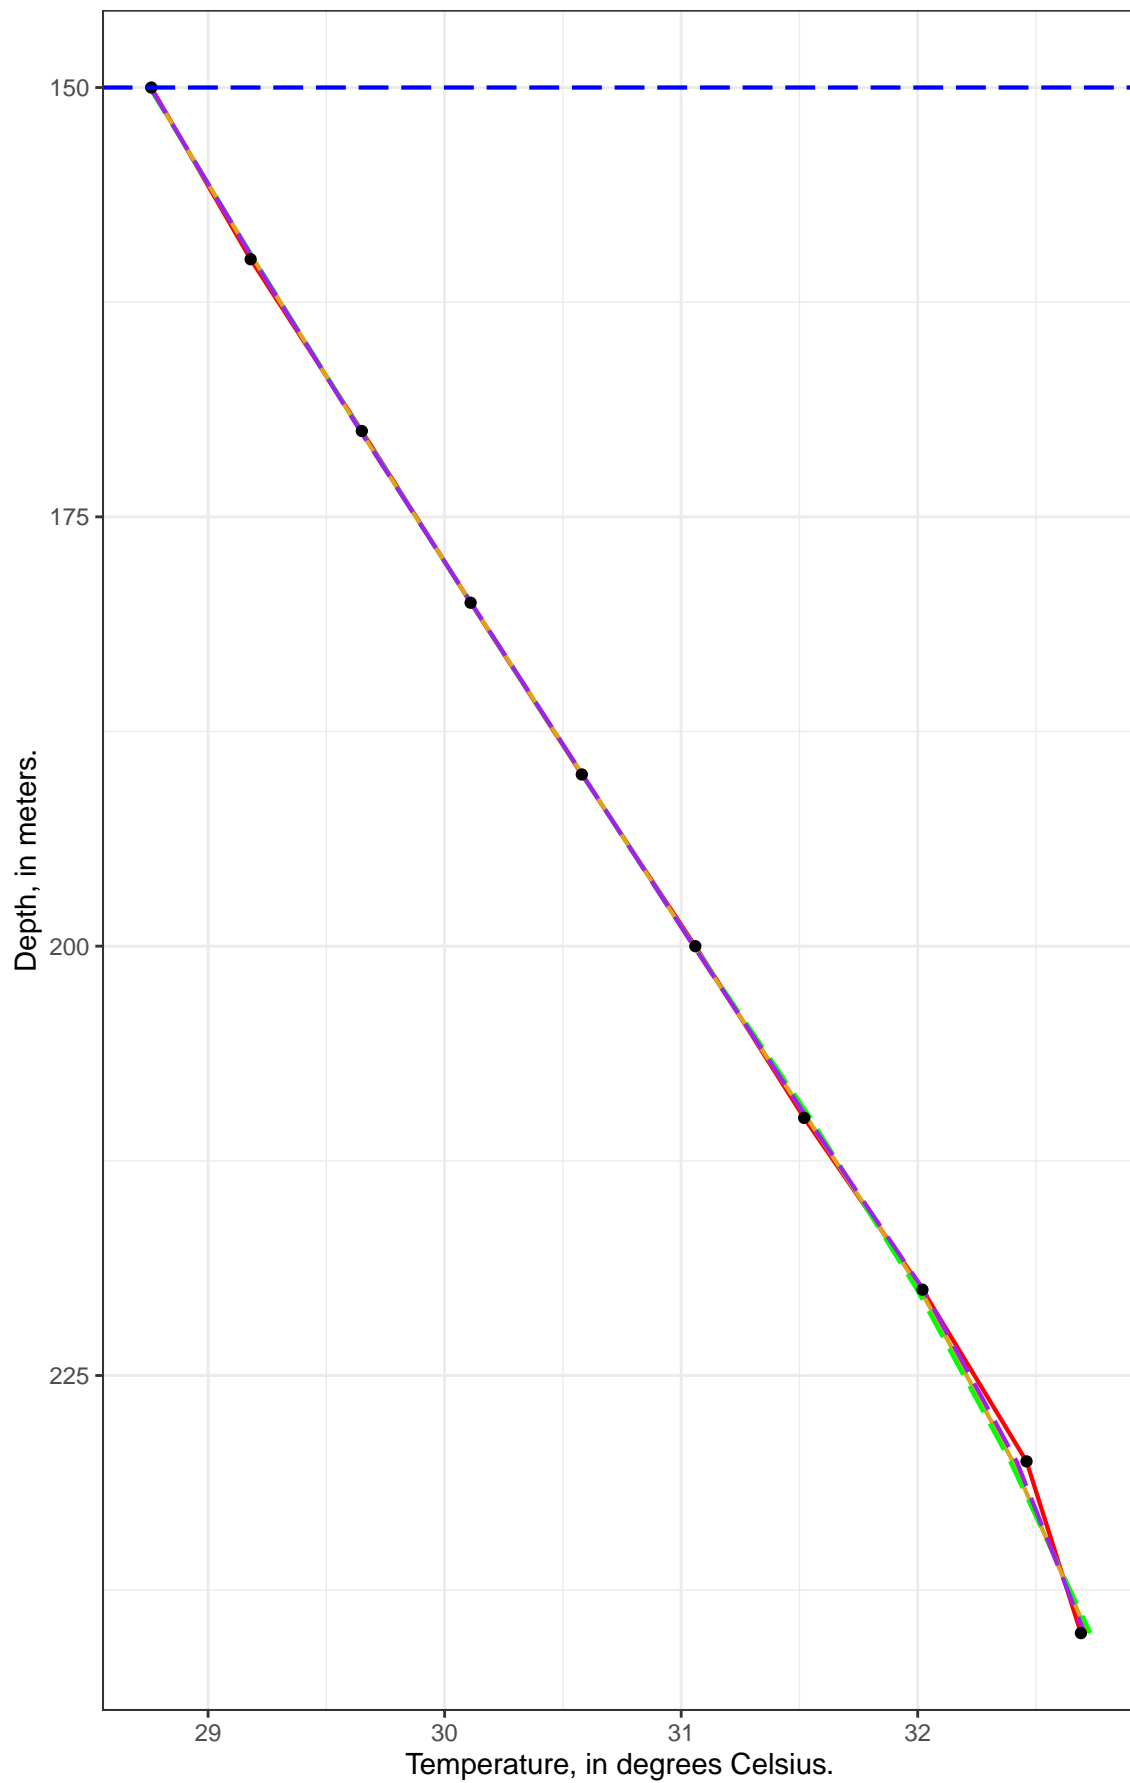

ID: 2 [Aden\_Hills] First Derivative

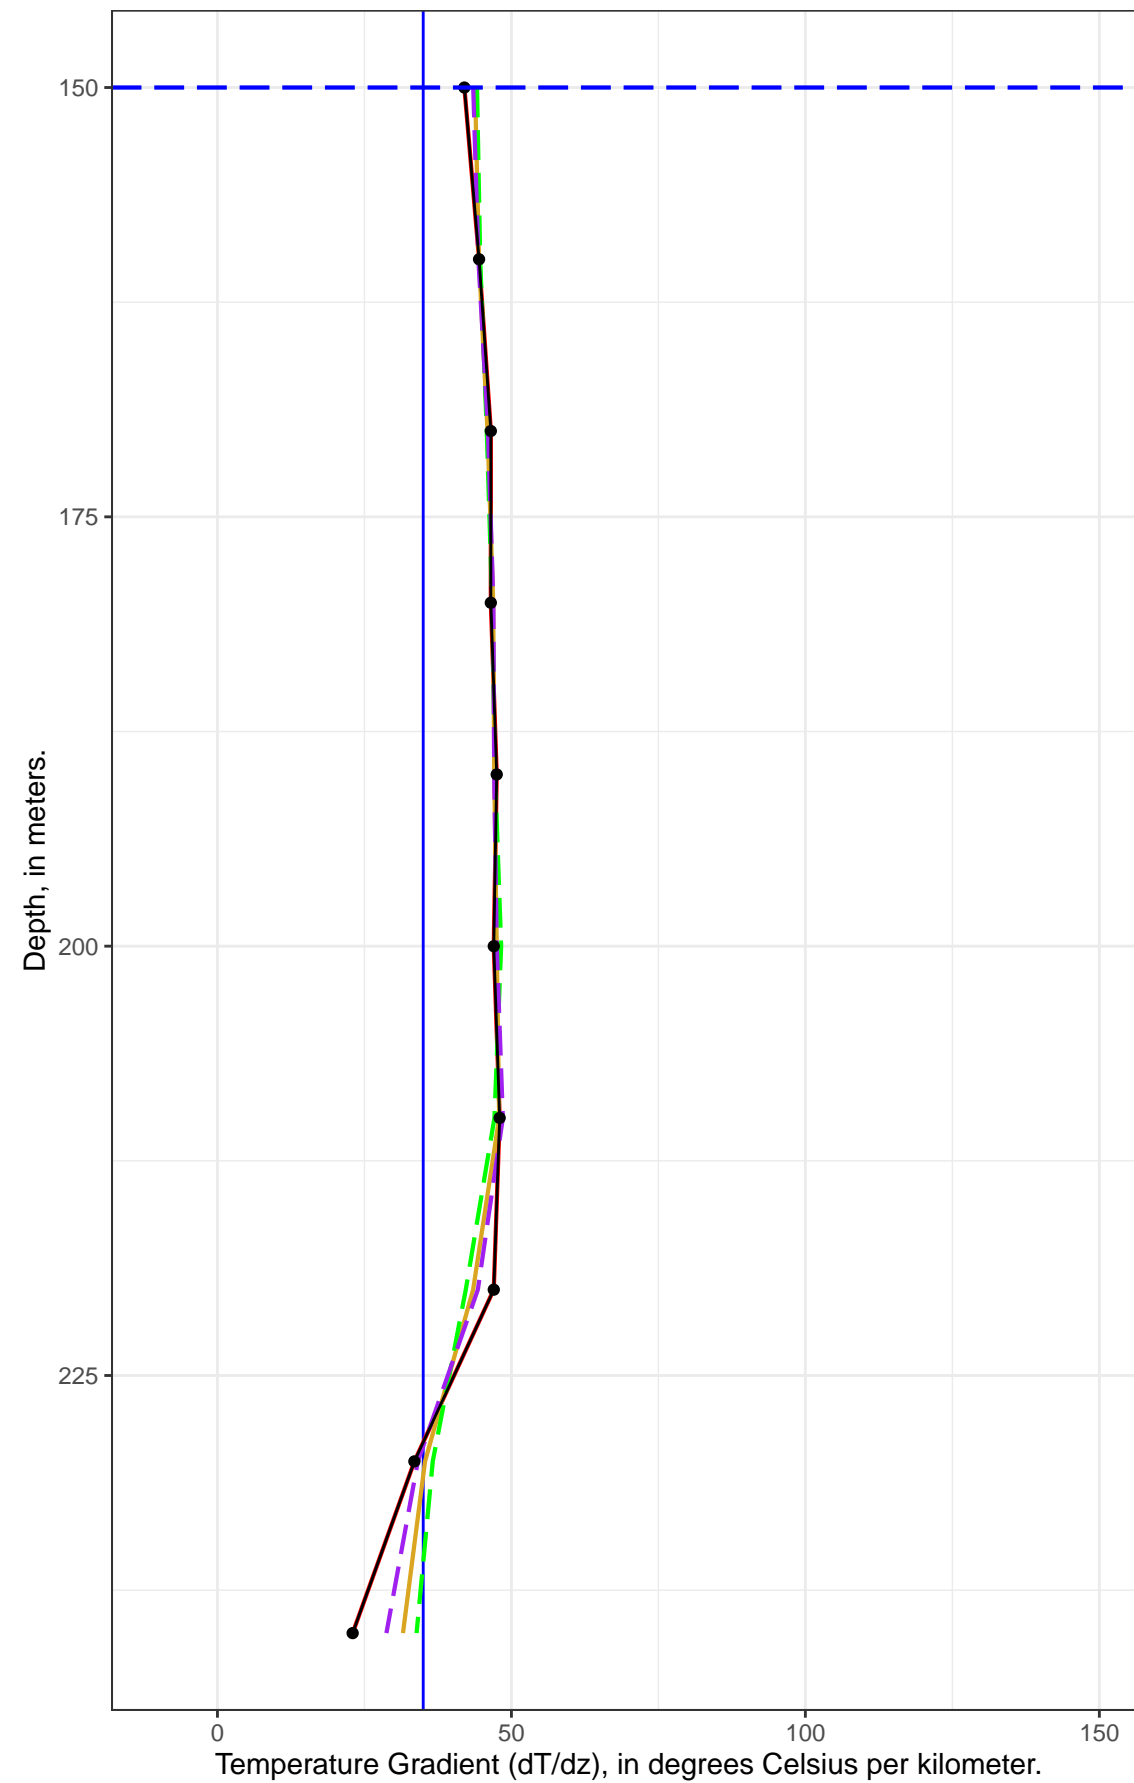

ID: 2 [Aden\_Hills] Second Derivative

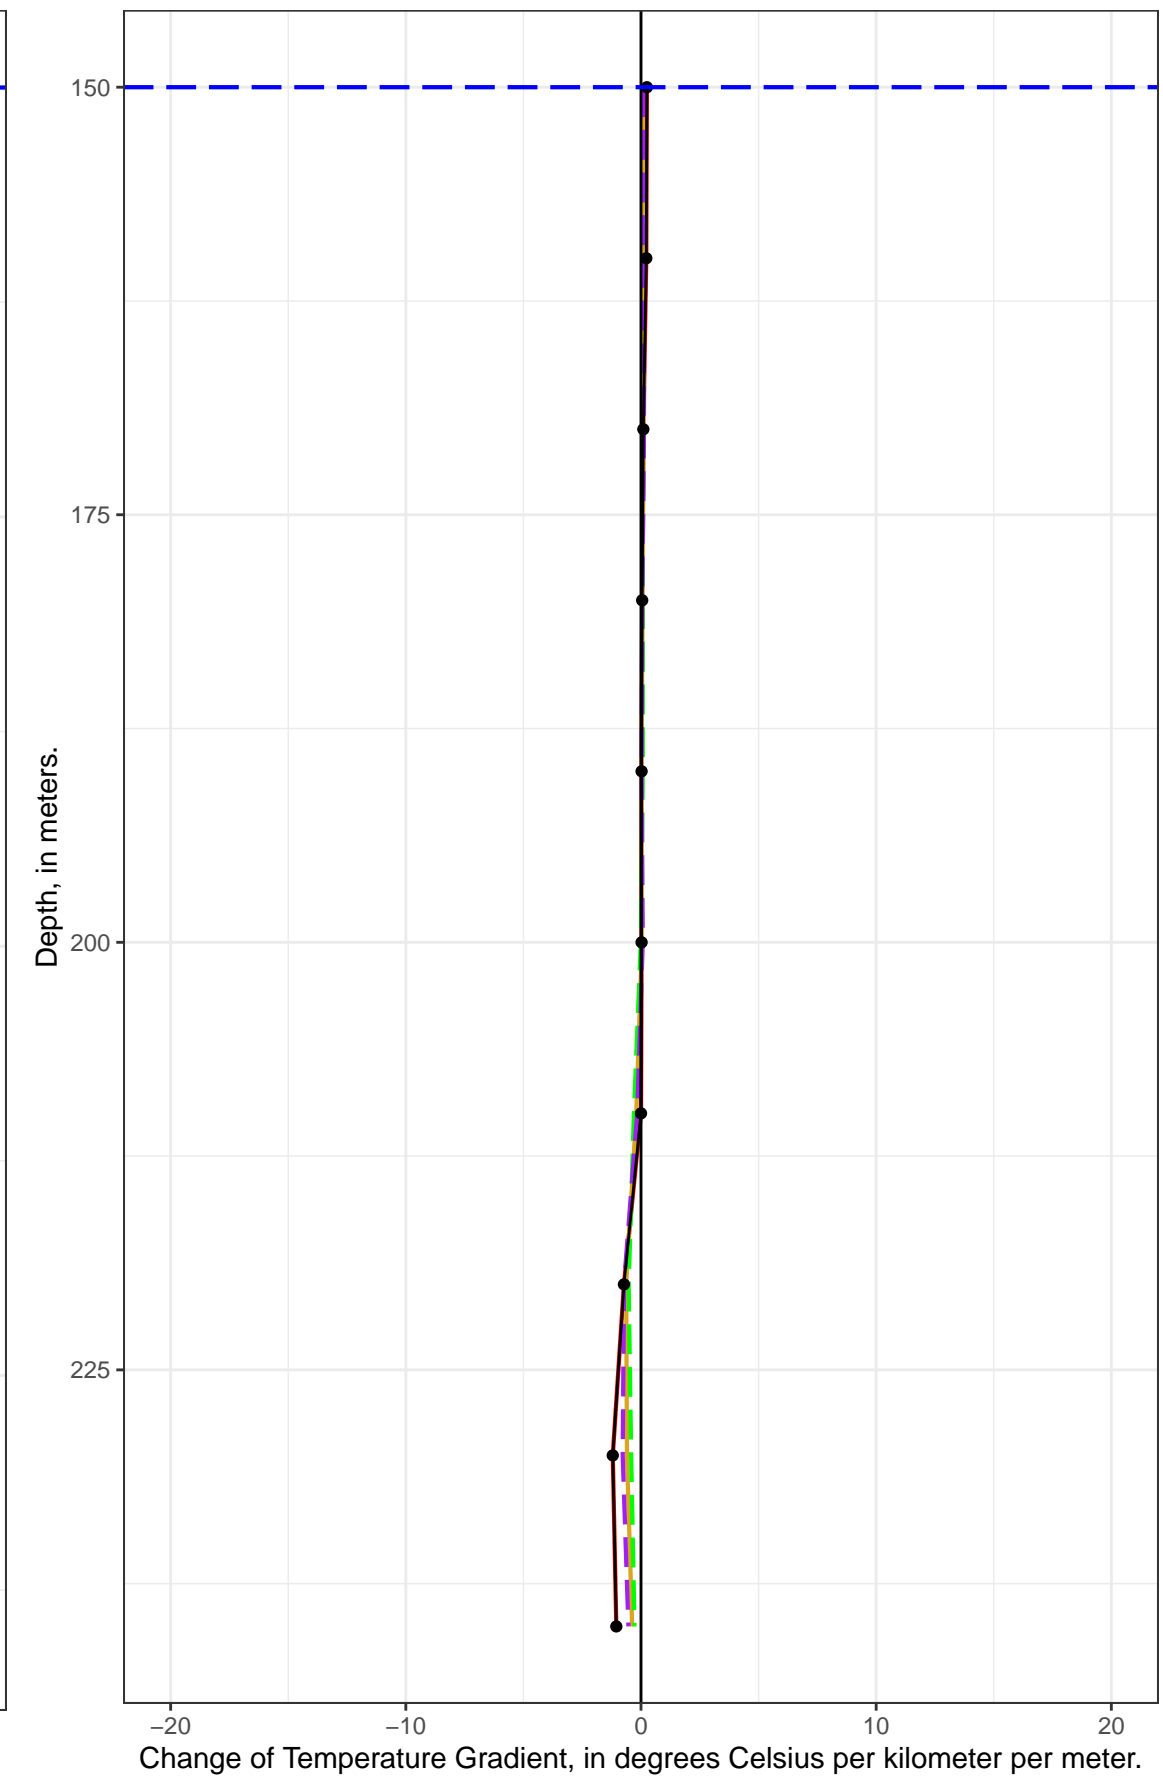

• Data • LOESS (AICC) • LOESS (constant) • LOESS (GCV) • Spline

• Data • LOESS (AICC) • LOESS (constant) • LOESS (GCV) • Spline

• Data • LOESS (AICC) • LOESS (constant) • LOESS (GCV) • Spline

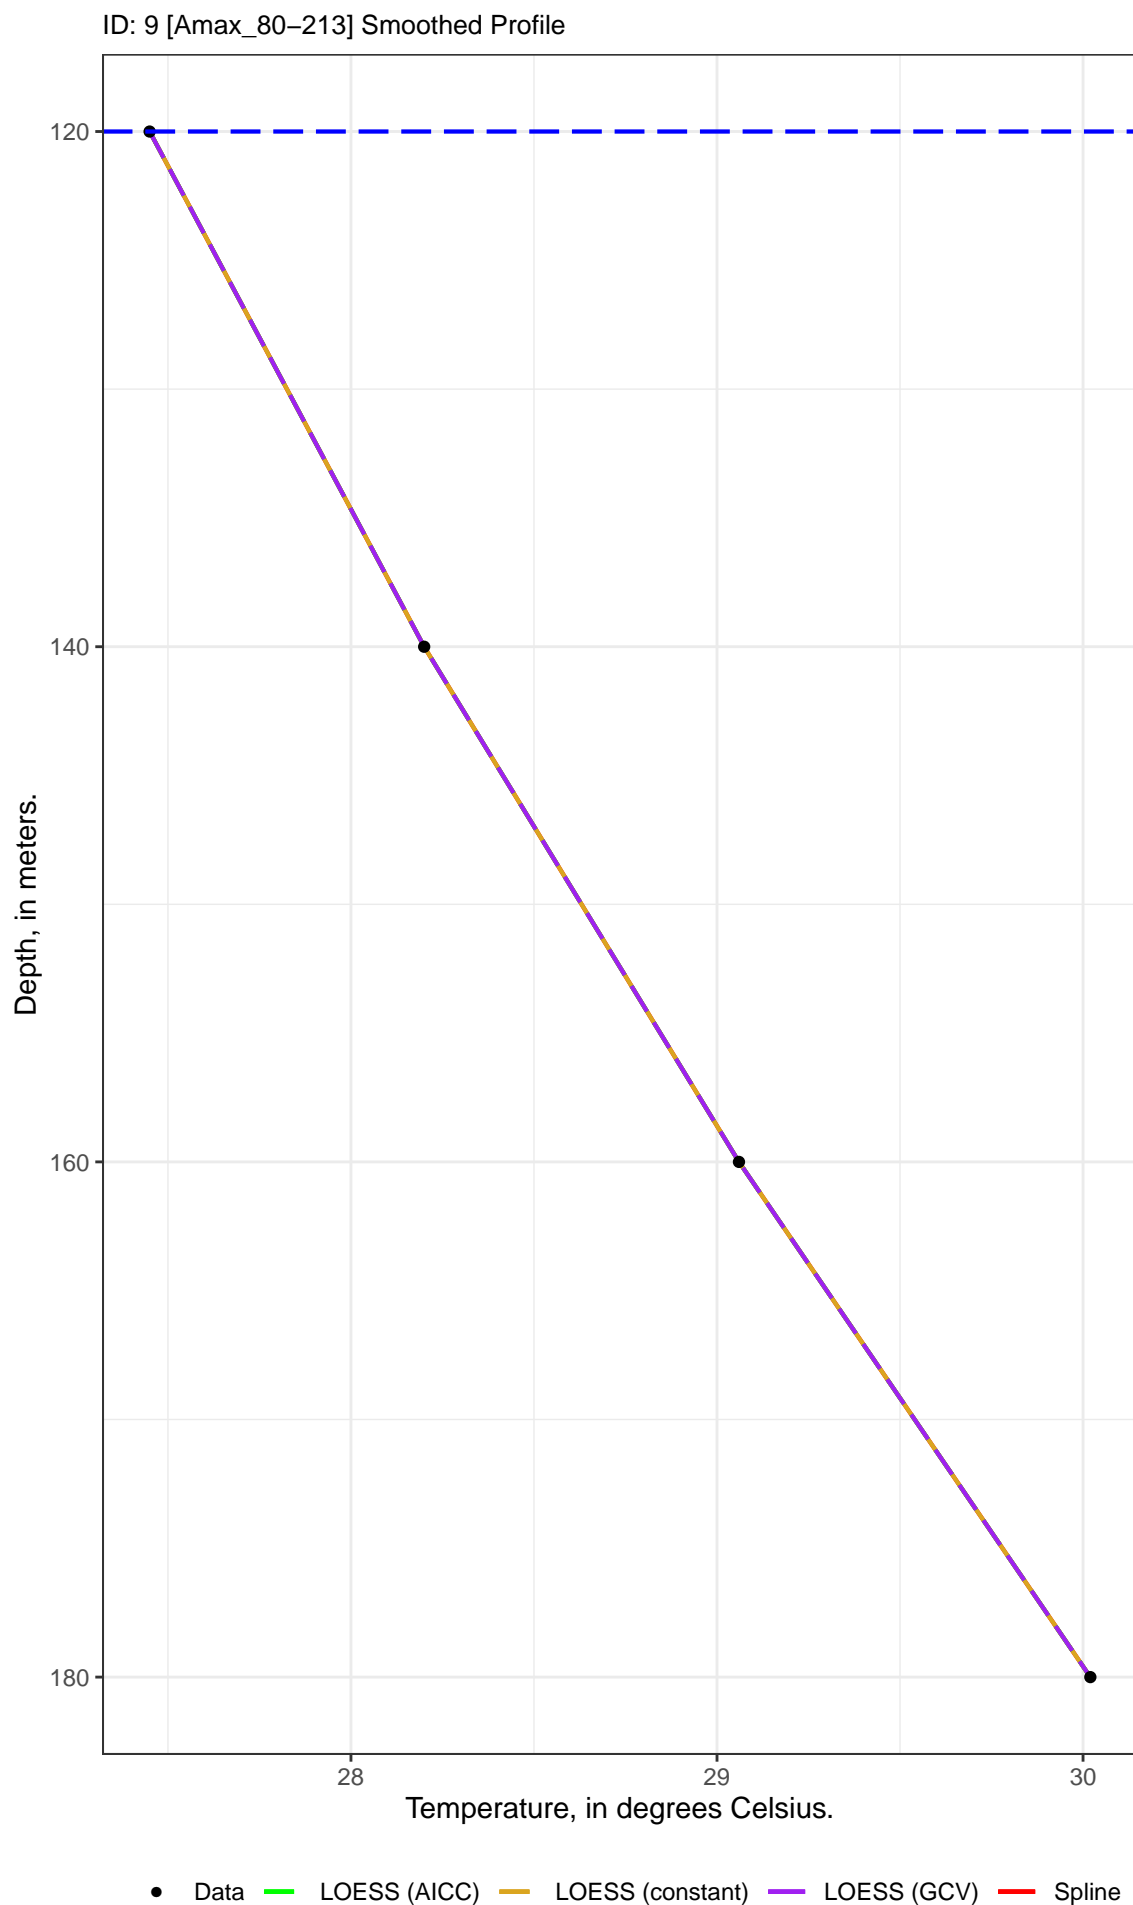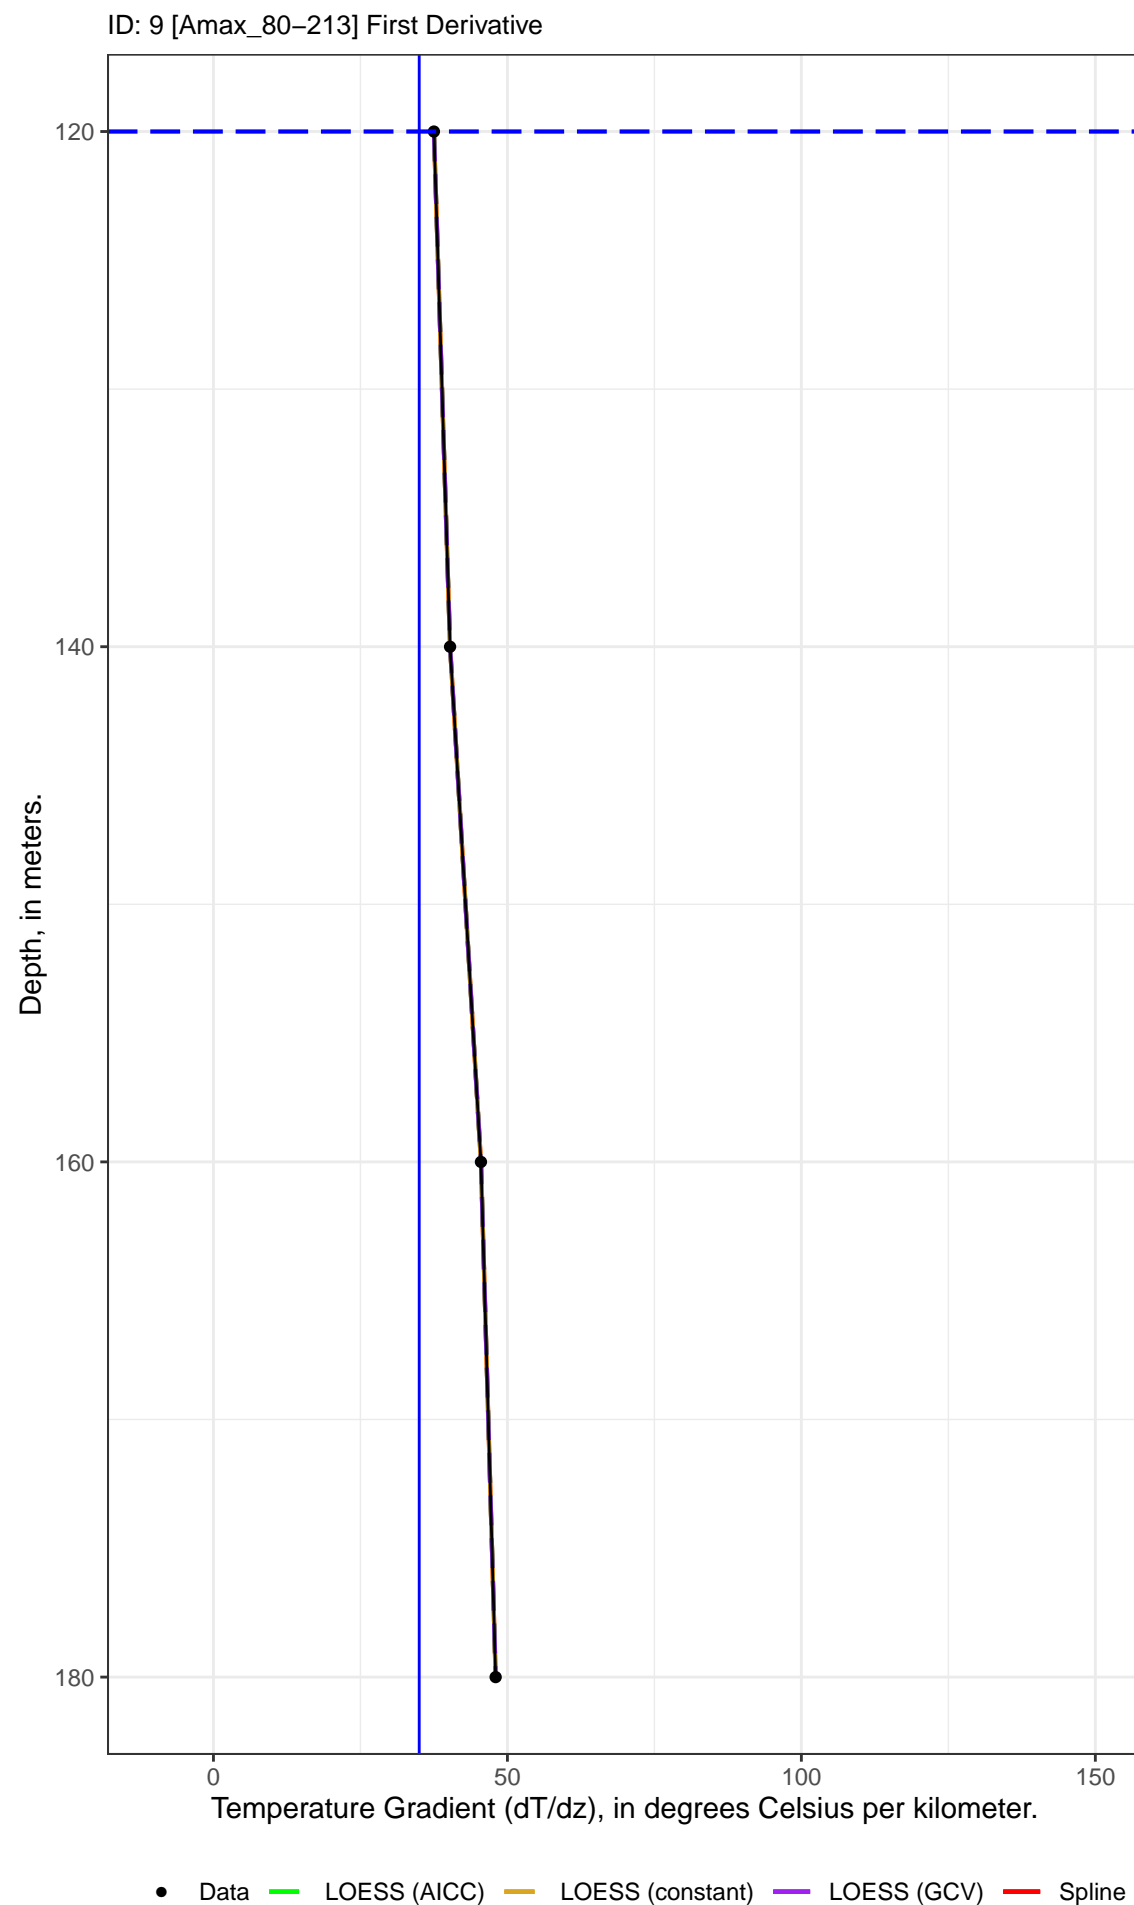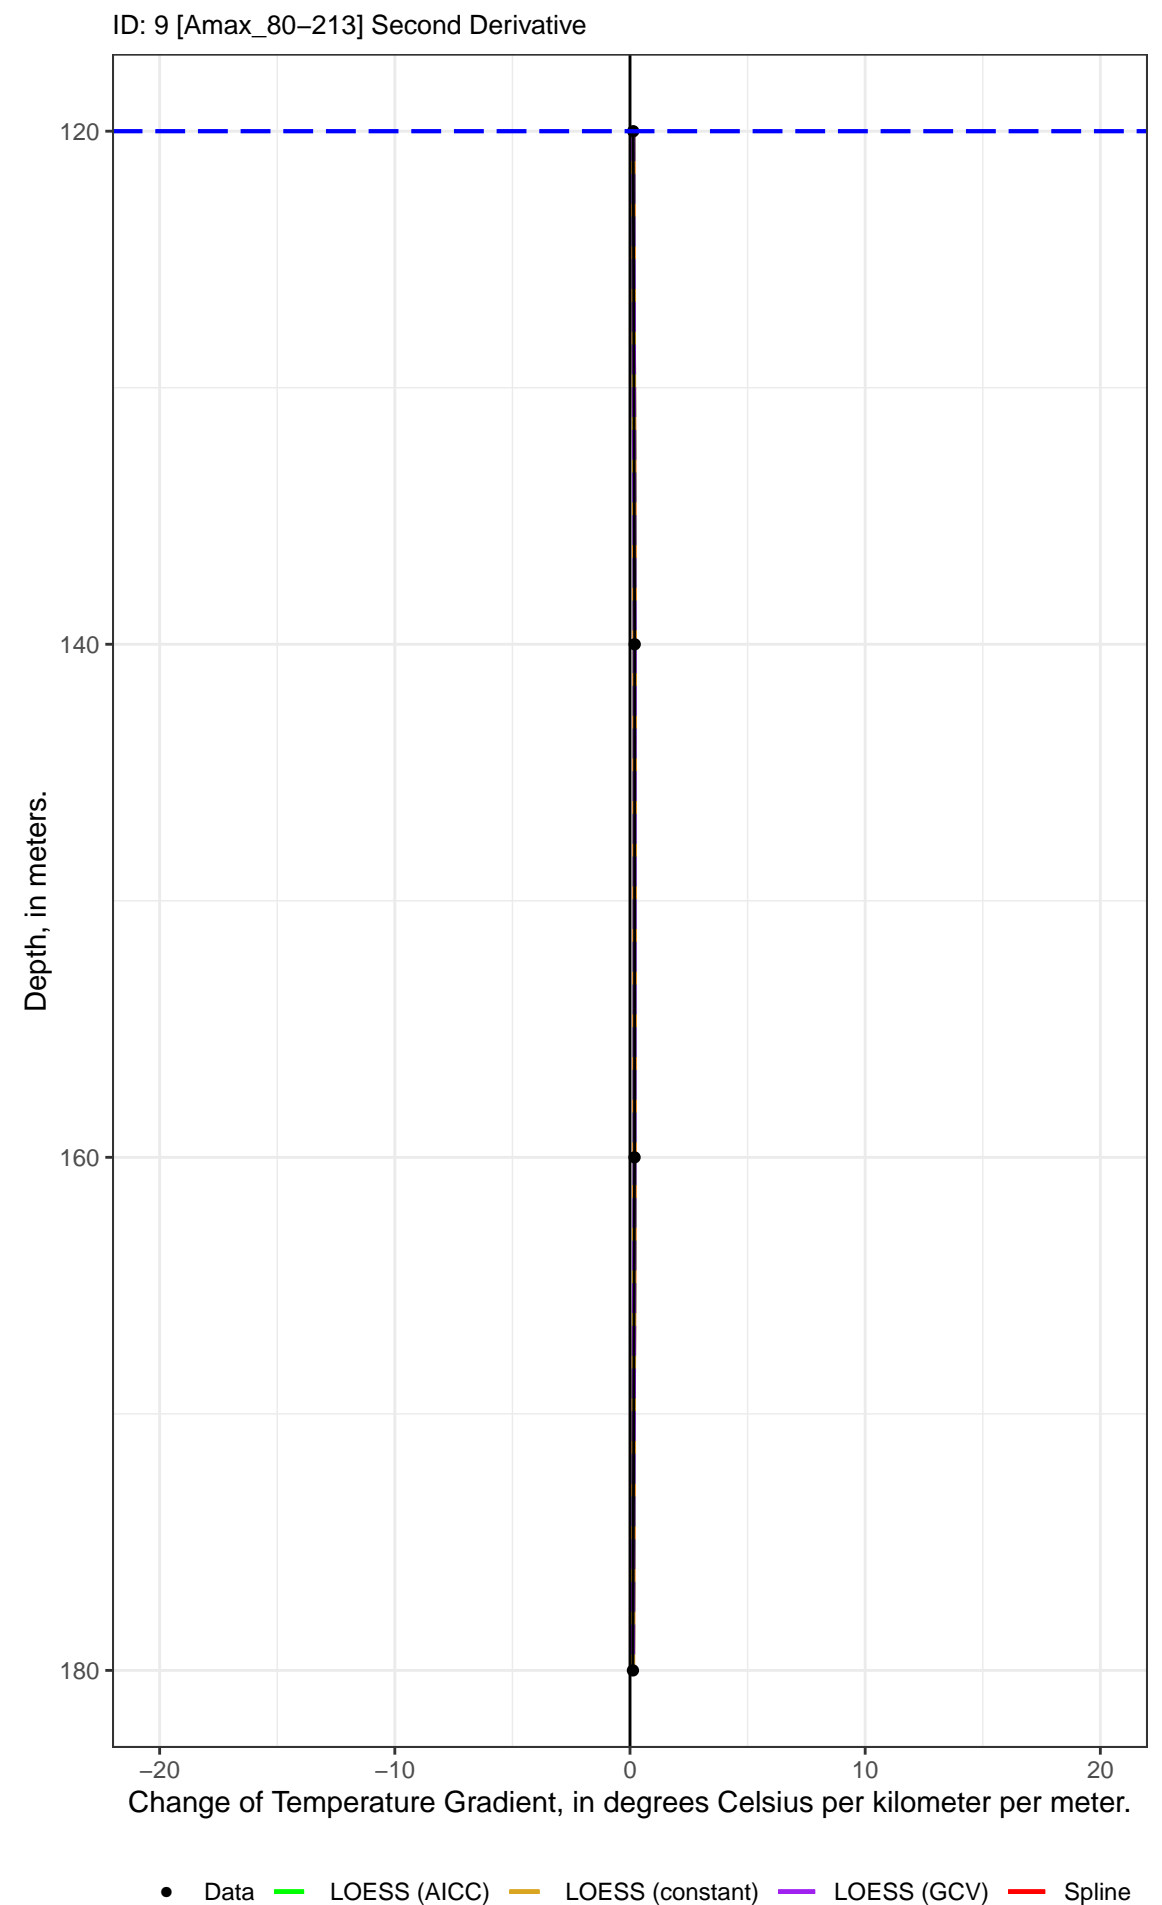

ID: 48 [ANKB-34\_KILBOURNE\_HOLE] Smoothed Profile

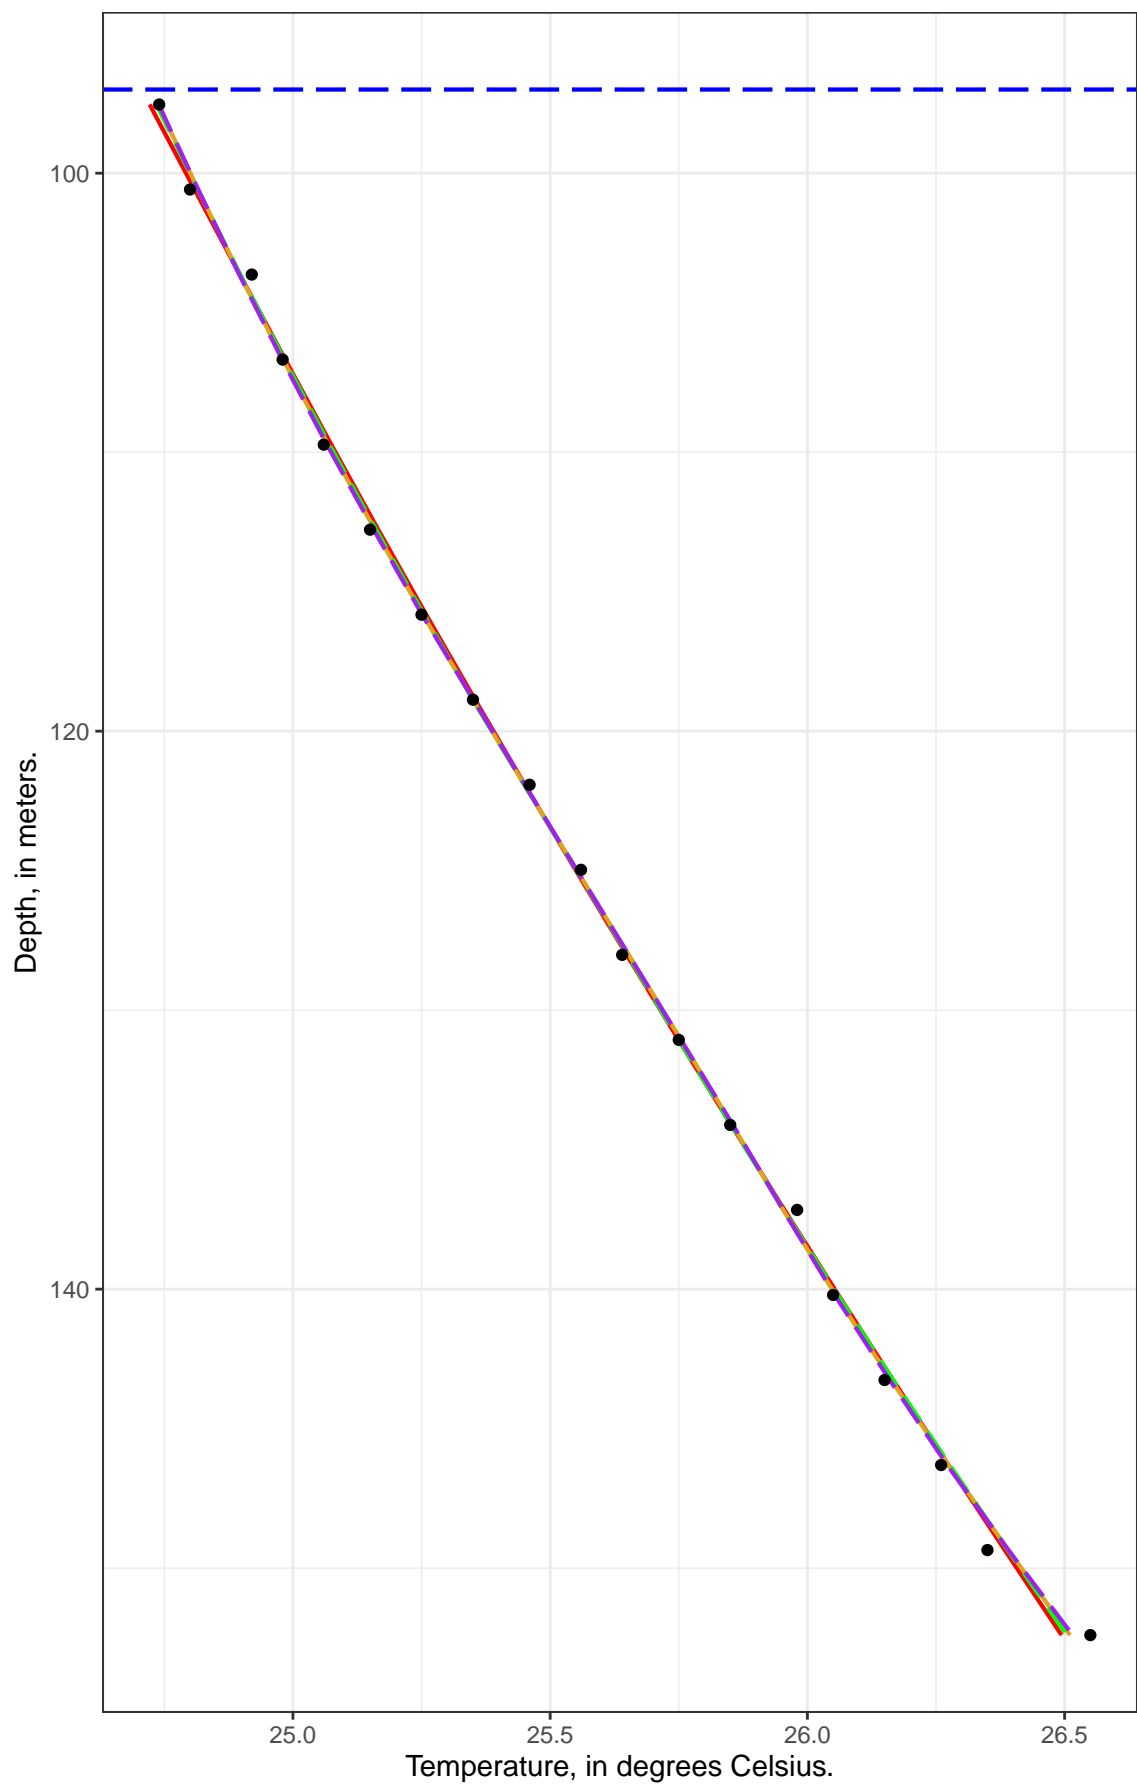

• Data — LOESS (AICC) — LOESS (constant) — LOESS (GCV) — Spline

ID: 48 [ANKB-34\_KILBOURNE\_HOLE] First Derivative

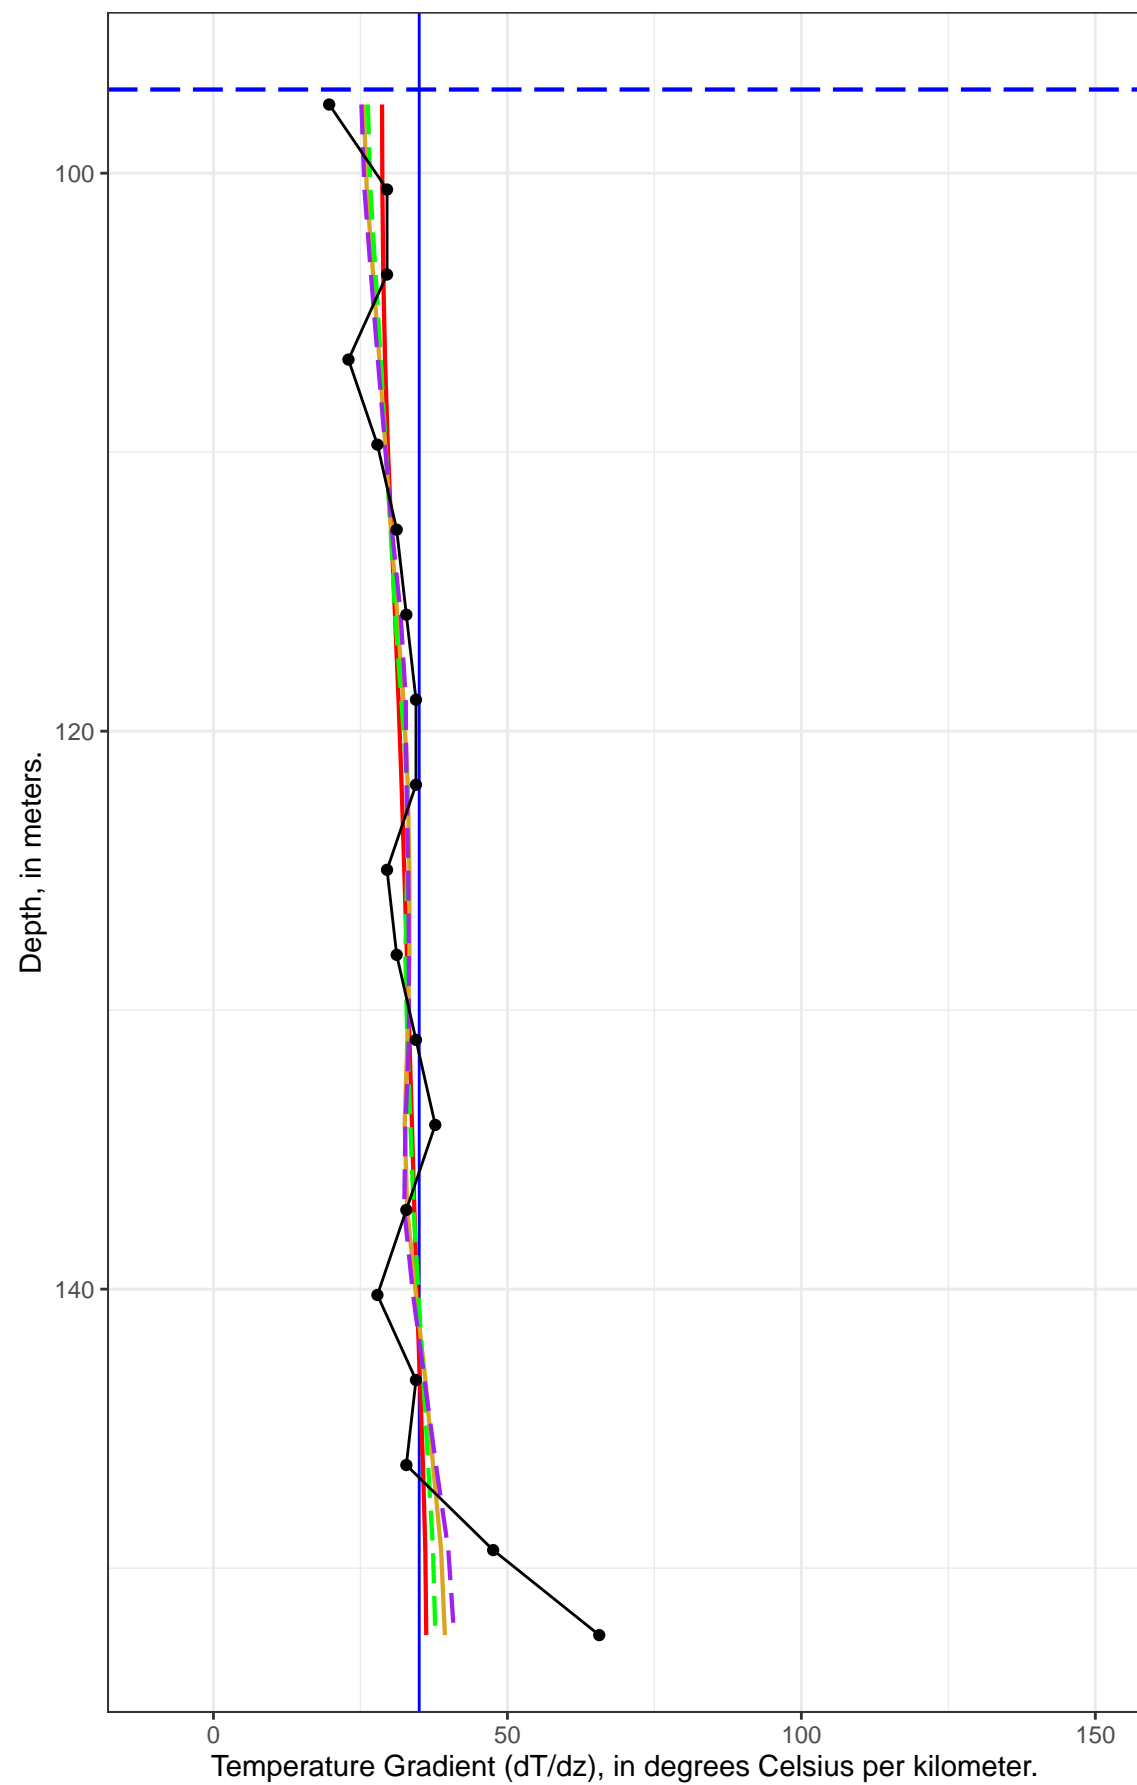

• Data — LOESS (AICC) — LOESS (constant) — LOESS (GCV) — Spline

ID: 48 [ANKB-34\_KILBOURNE\_HOLE] Second Derivative

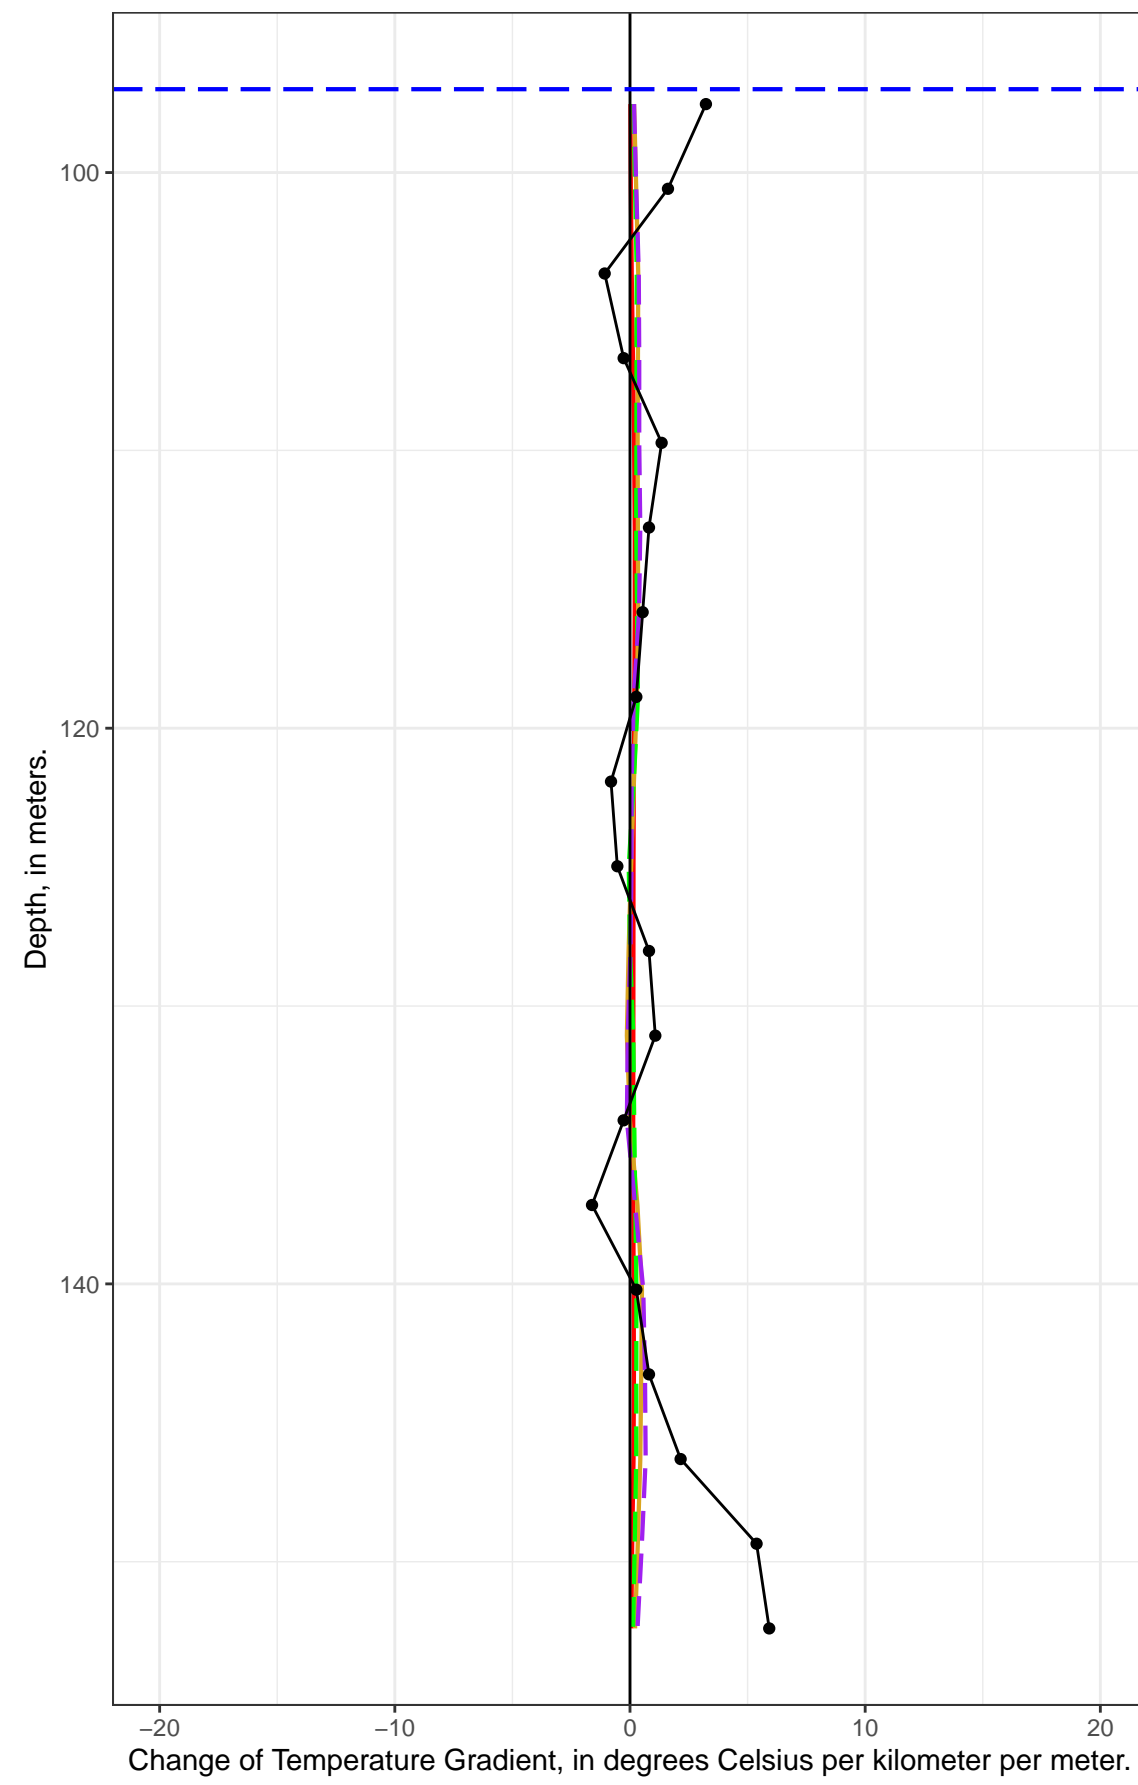

• Data — LOESS (AICC) — LOESS (constant) — LOESS (GCV) — Spline

ID: 49 [ANKB-35\_KILBOURNE\_HOLE] Smoothed Profile

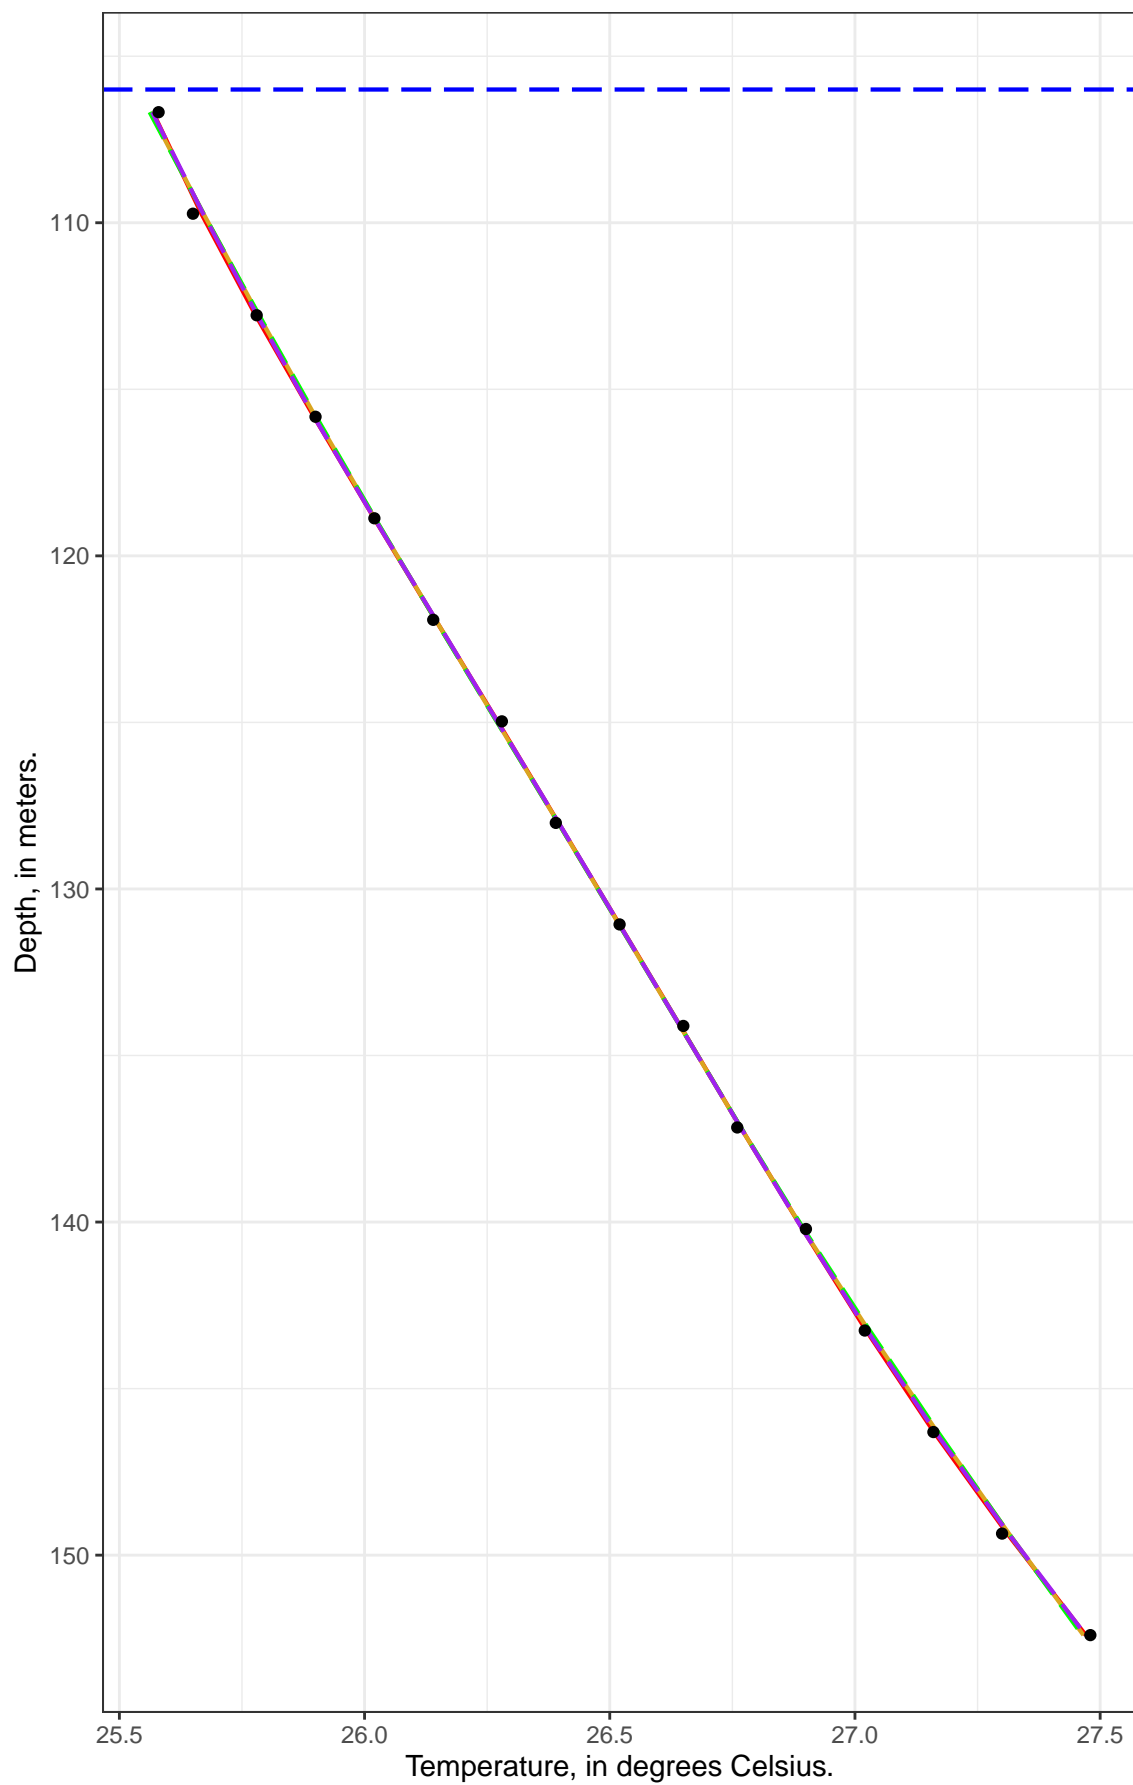

ID: 49 [ANKB-35\_KILBOURNE\_HOLE] First Derivative

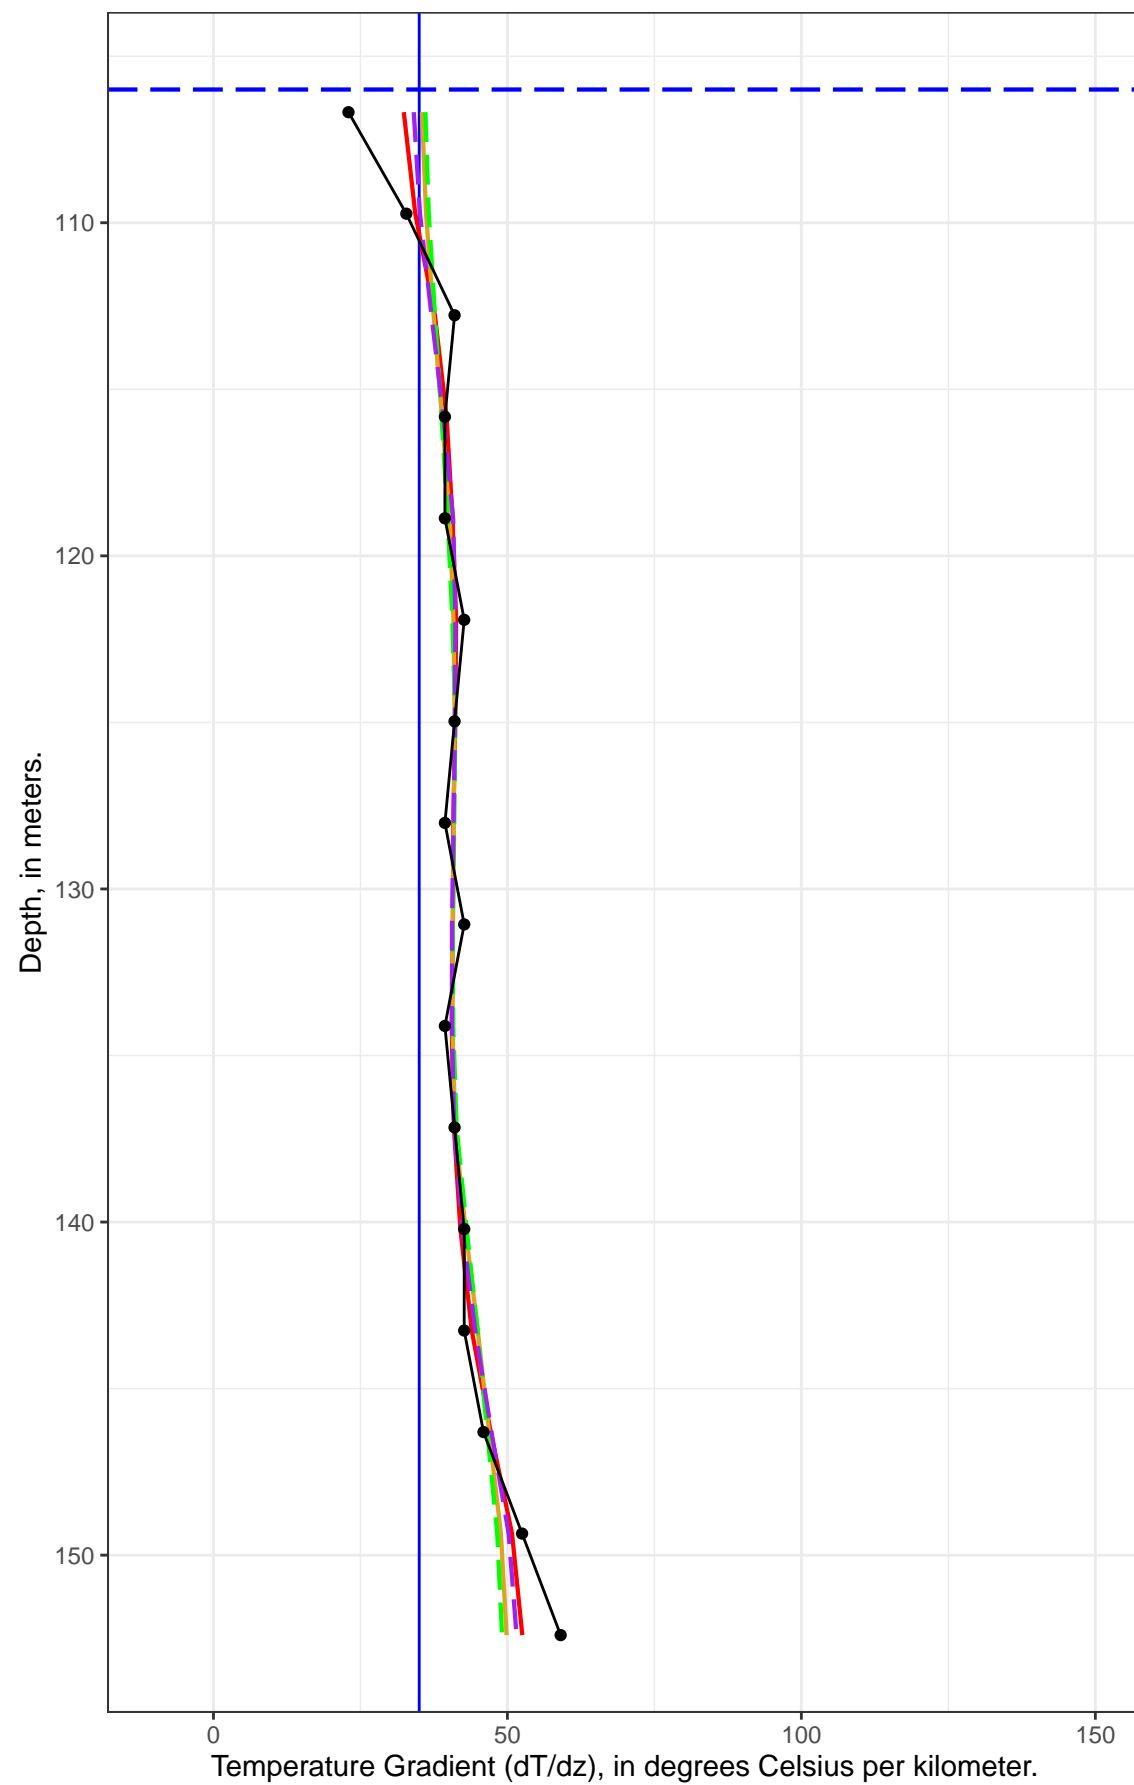

ID: 49 [ANKB-35\_KILBOURNE\_HOLE] Second Derivative

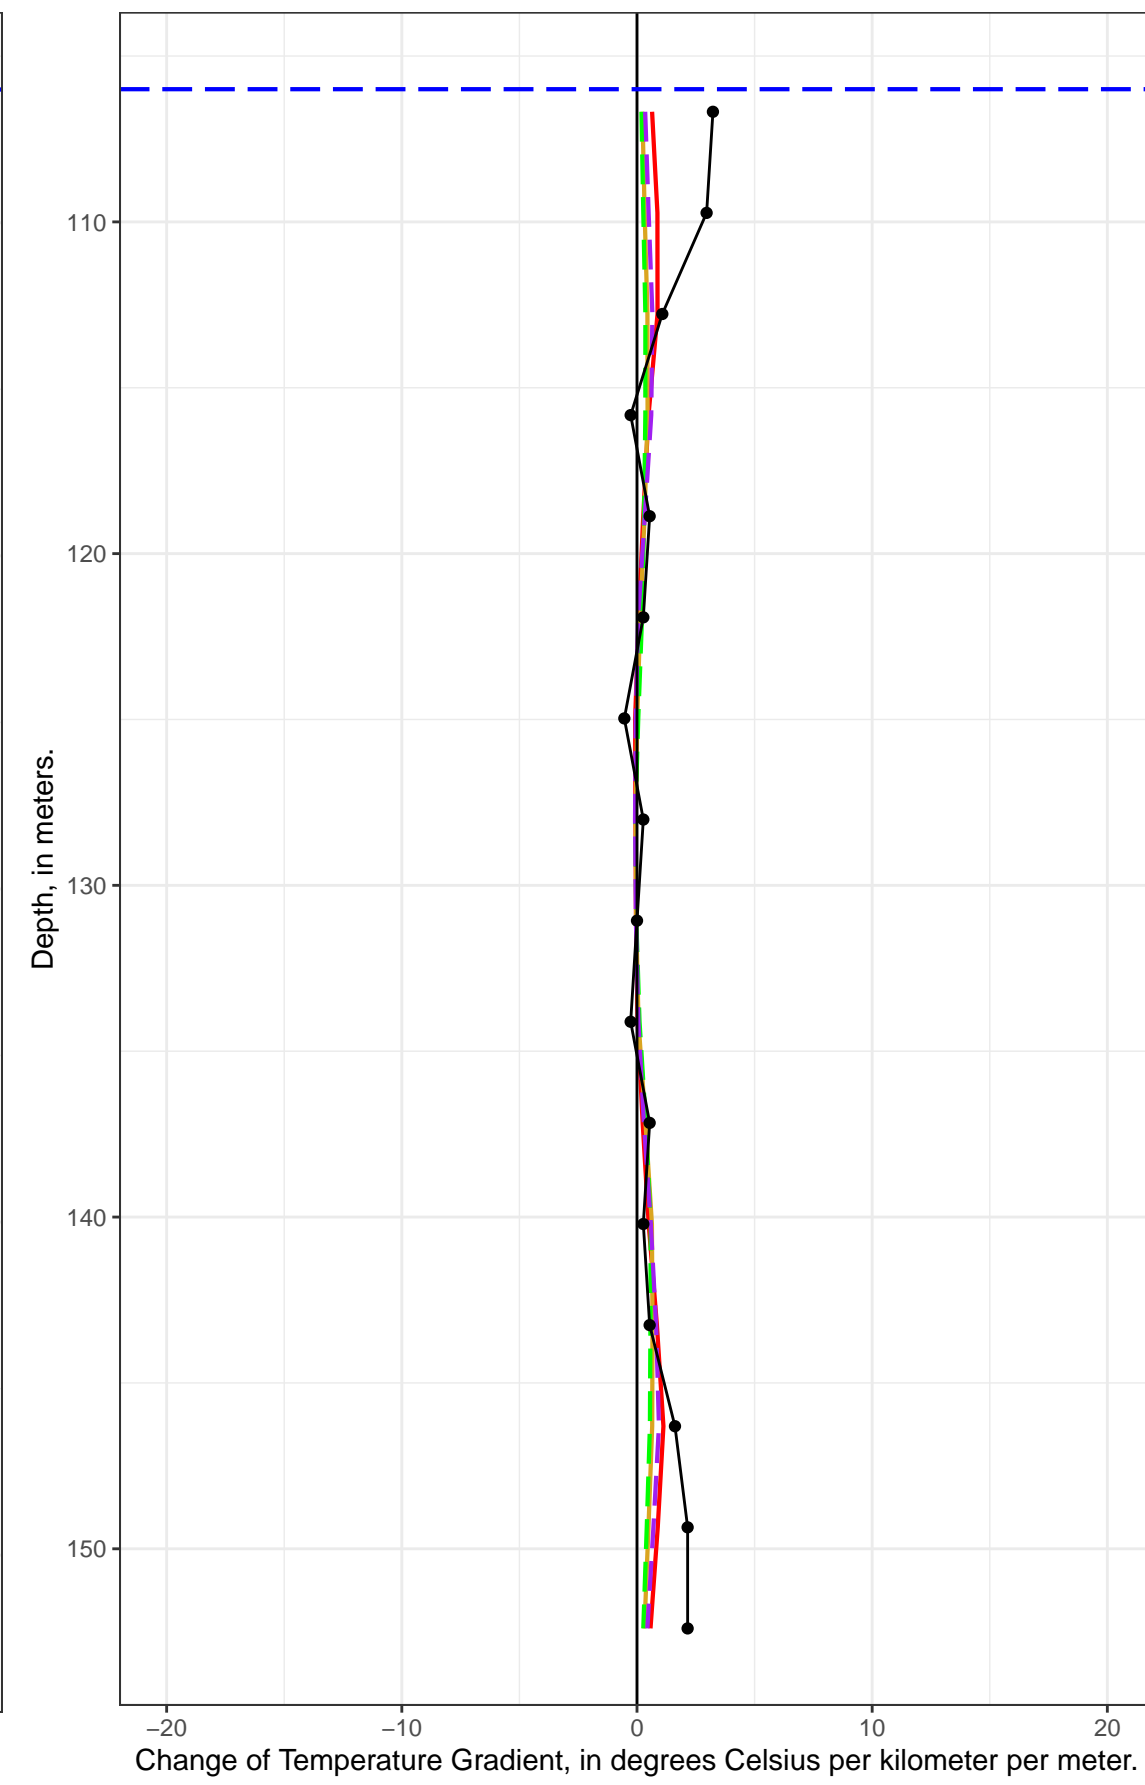

• Data • LOESS (AICC) • LOESS (constant) • LOESS (GCV) • Spline

• Data • LOESS (AICC) • LOESS (constant) • LOESS (GCV) • Spline

• Data • LOESS (AICC) • LOESS (constant) • LOESS (GCV) • Spline

ID: 50 [ANKB-36\_KILBOURNE\_HOLE] Smoothed Profile

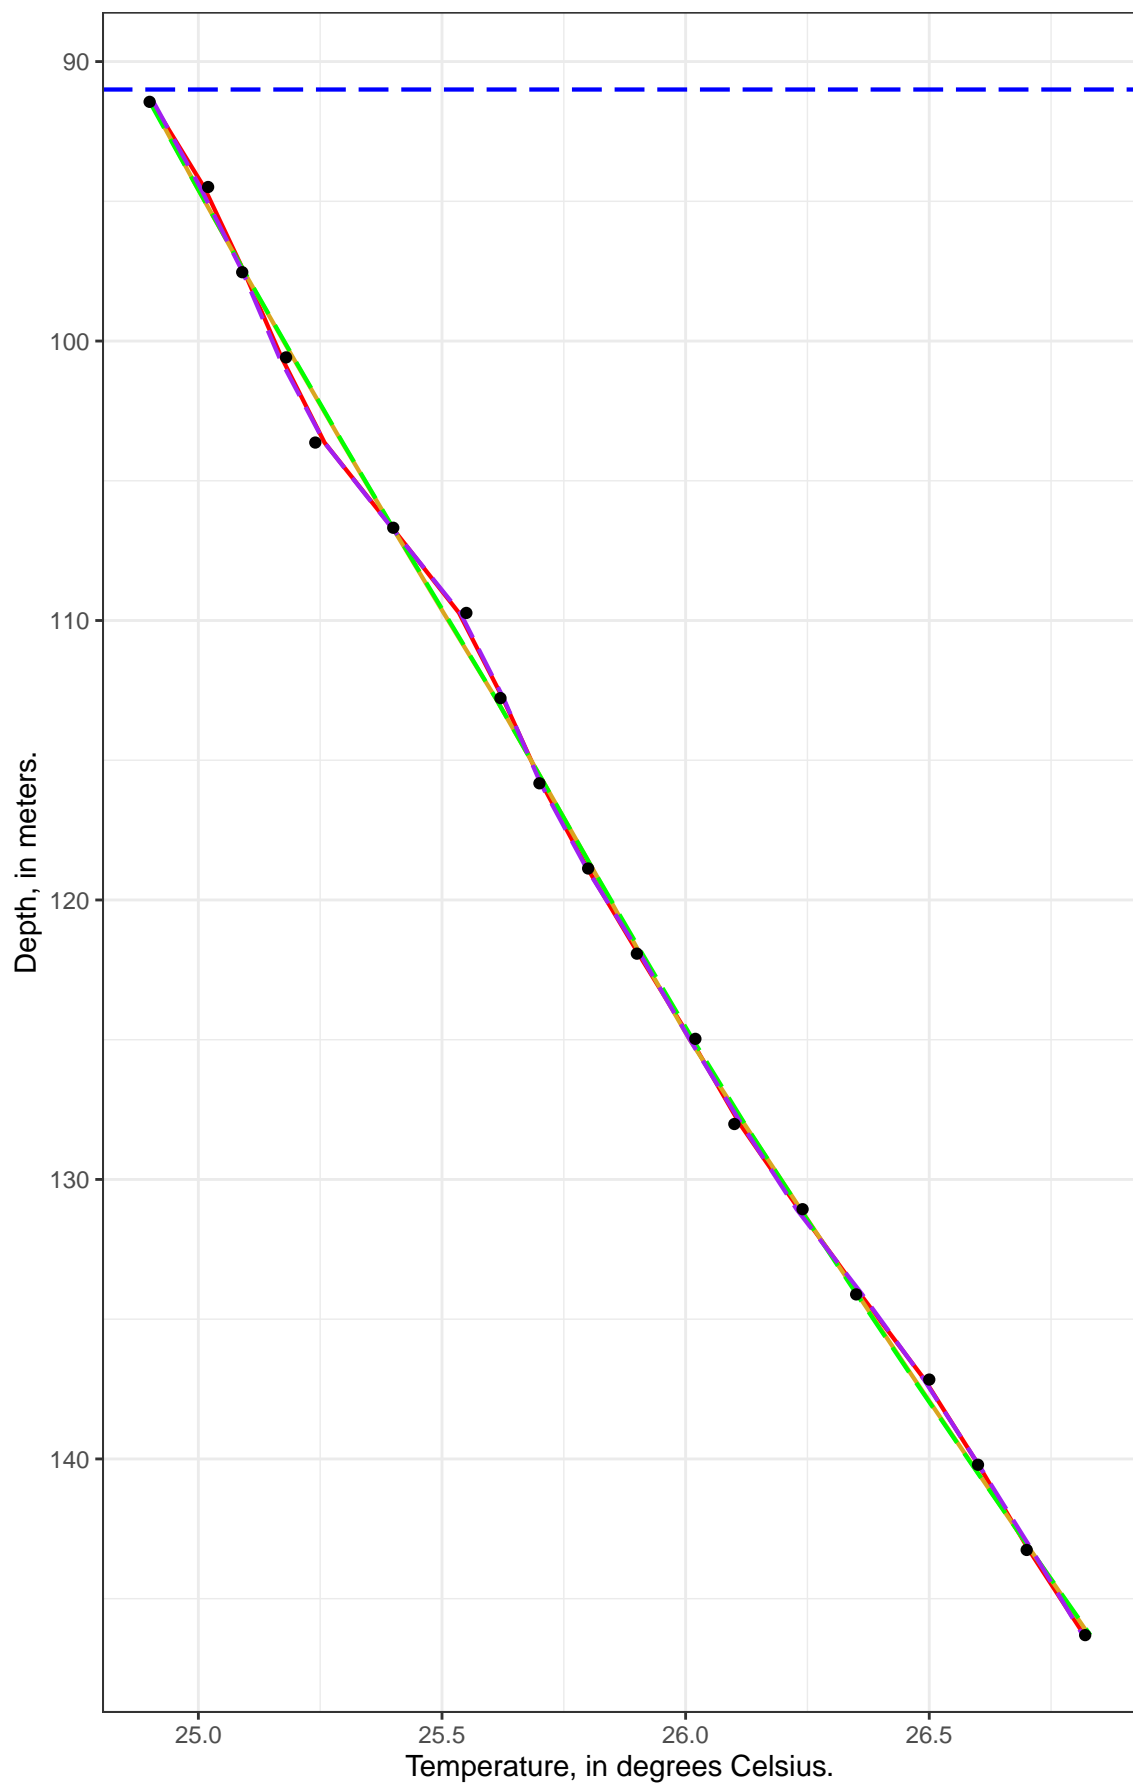

ID: 50 [ANKB-36\_KILBOURNE\_HOLE] First Derivative

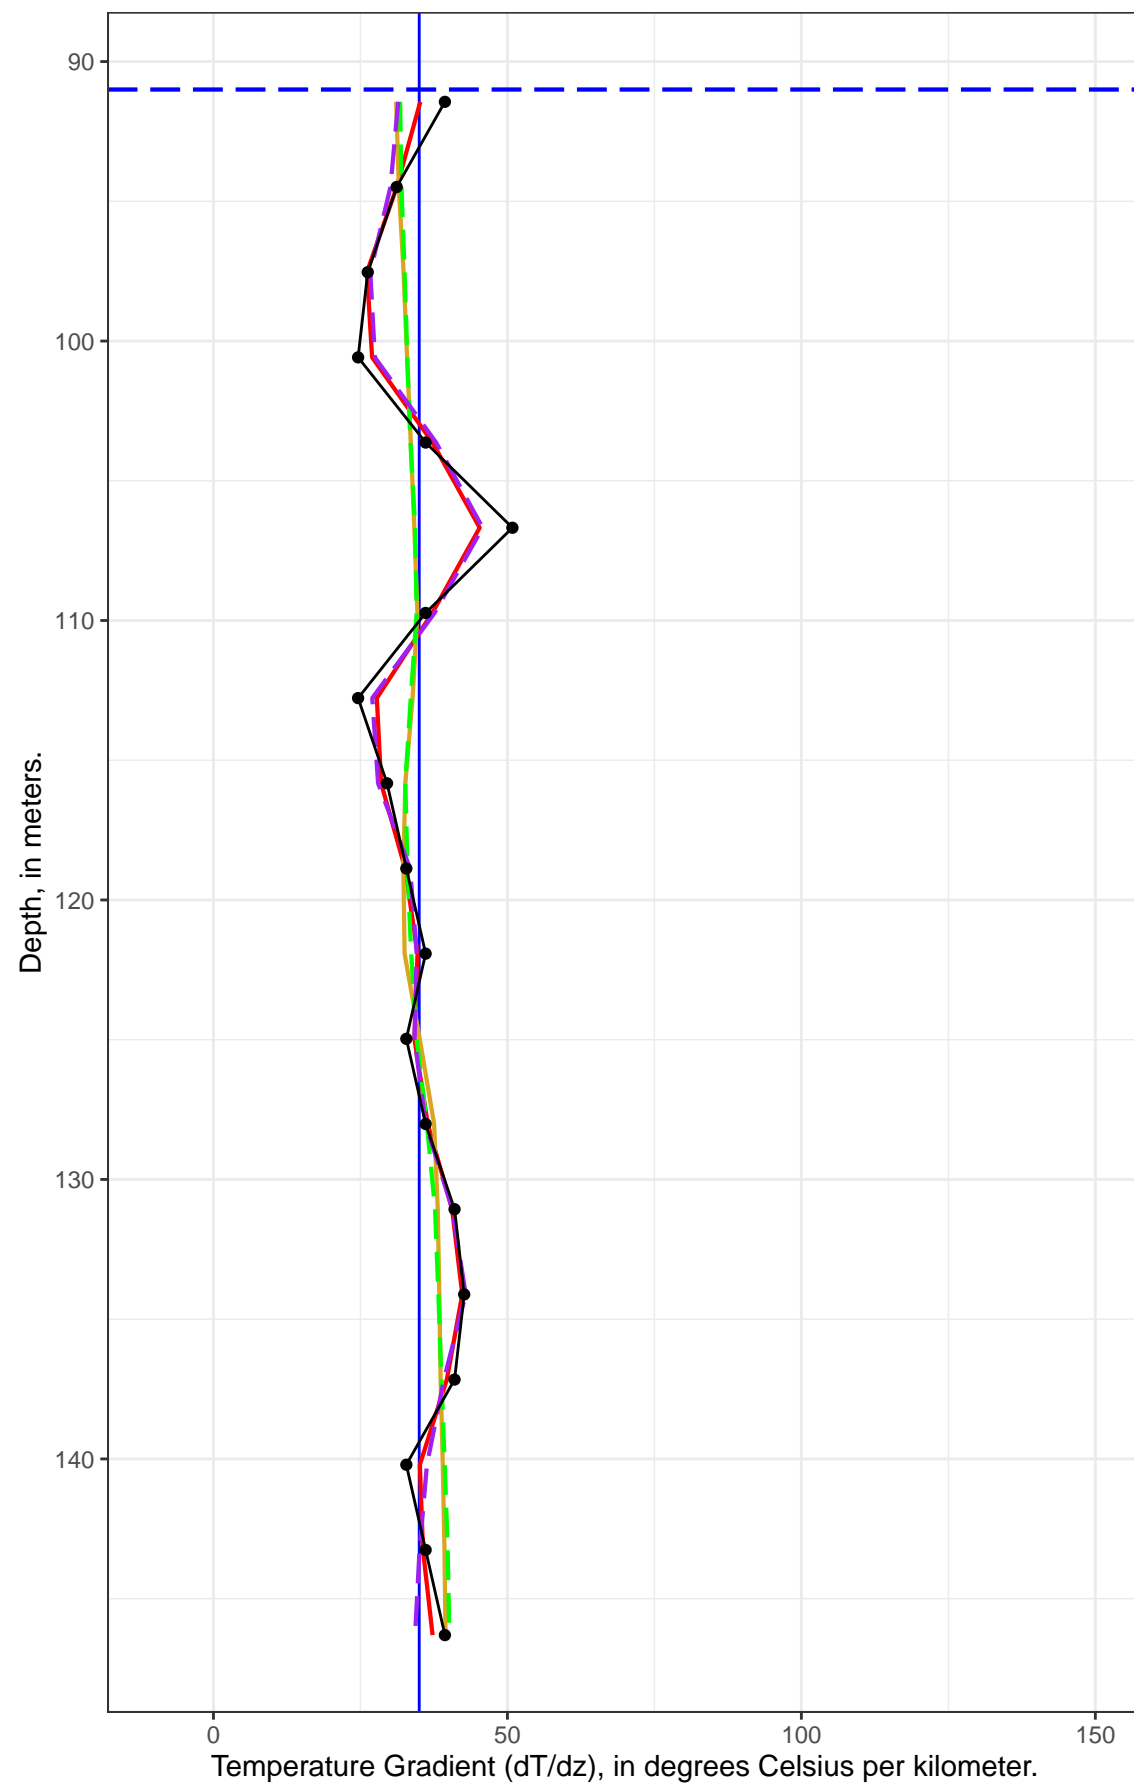

ID: 50 [ANKB-36\_KILBOURNE\_HOLE] Second Derivative

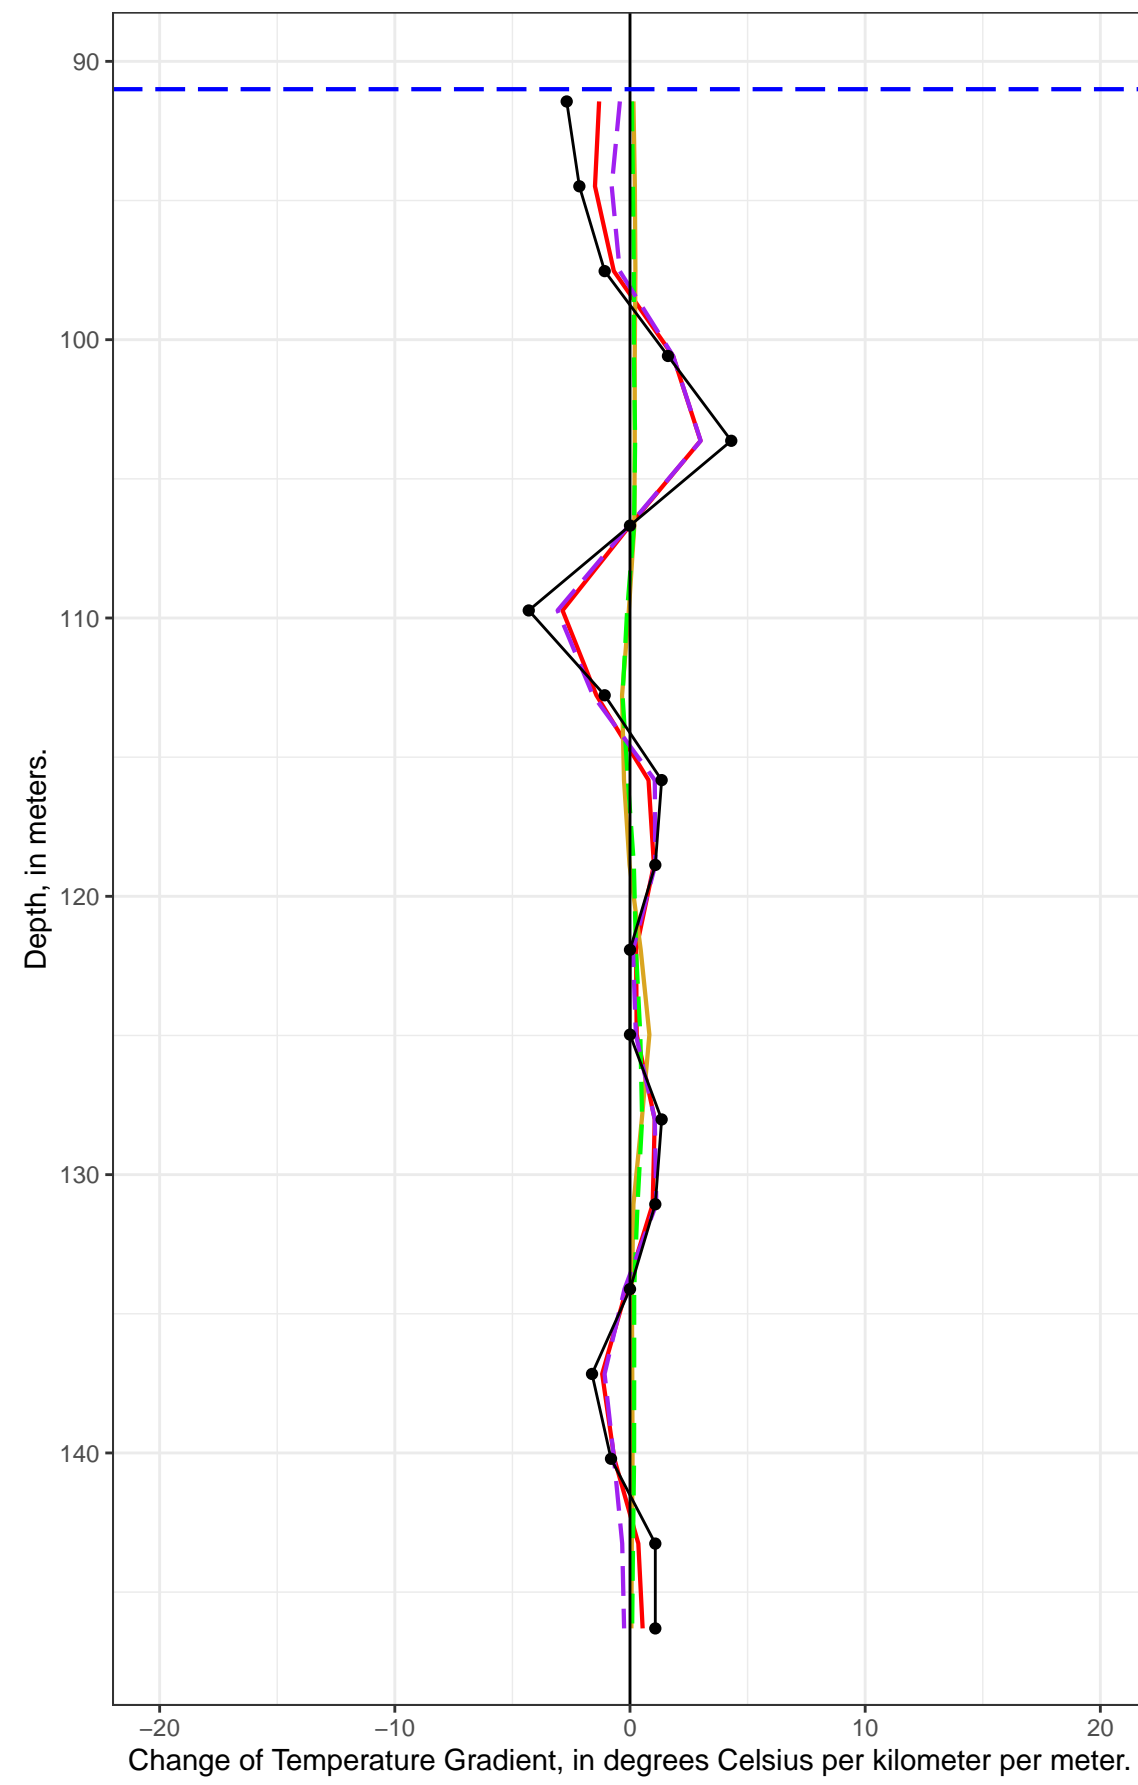

• Data — LOESS (AICC) — LOESS (constant) — LOESS (GCV) — Spline

• Data — LOESS (AICC) — LOESS (constant) — LOESS (GCV) — Spline

• Data — LOESS (AICC) — LOESS (constant) — LOESS (GCV) — Spline

ID: 56 [DA-14] Smoothed Profile

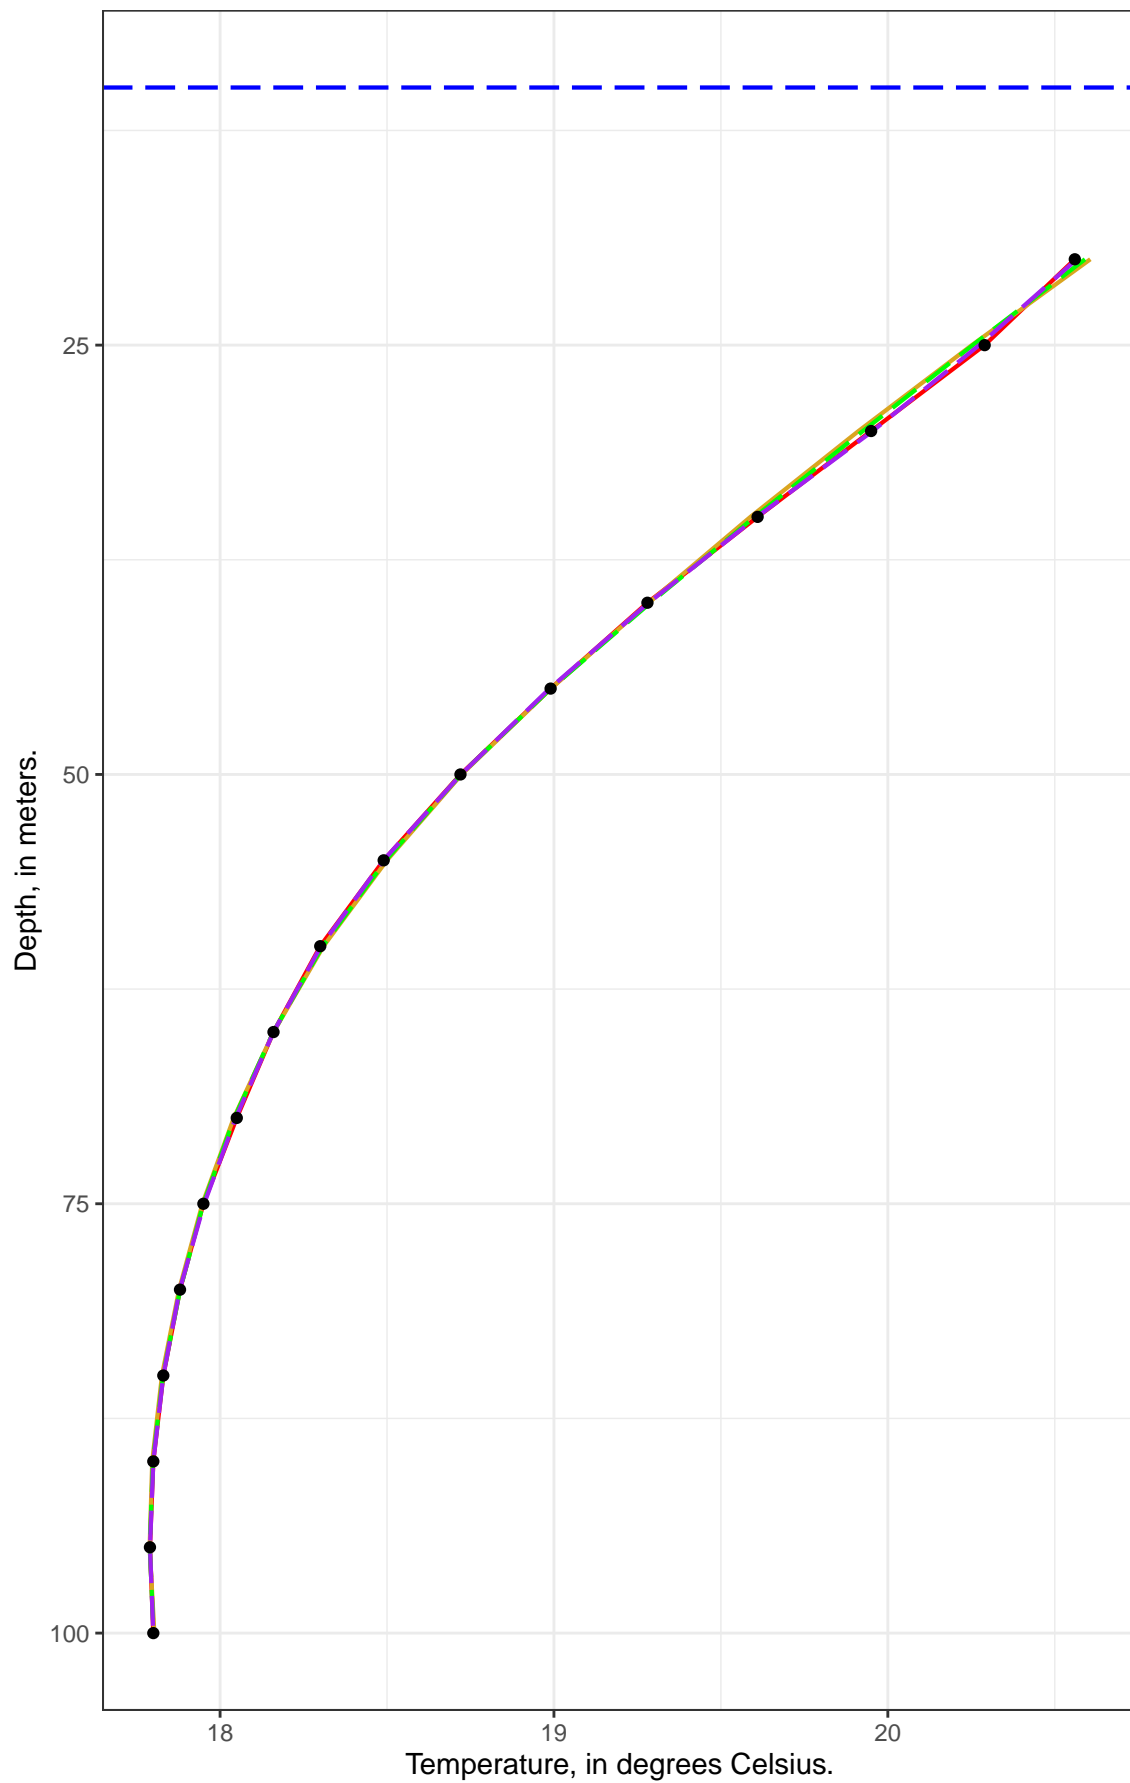

ID: 56 [DA-14] First Derivative

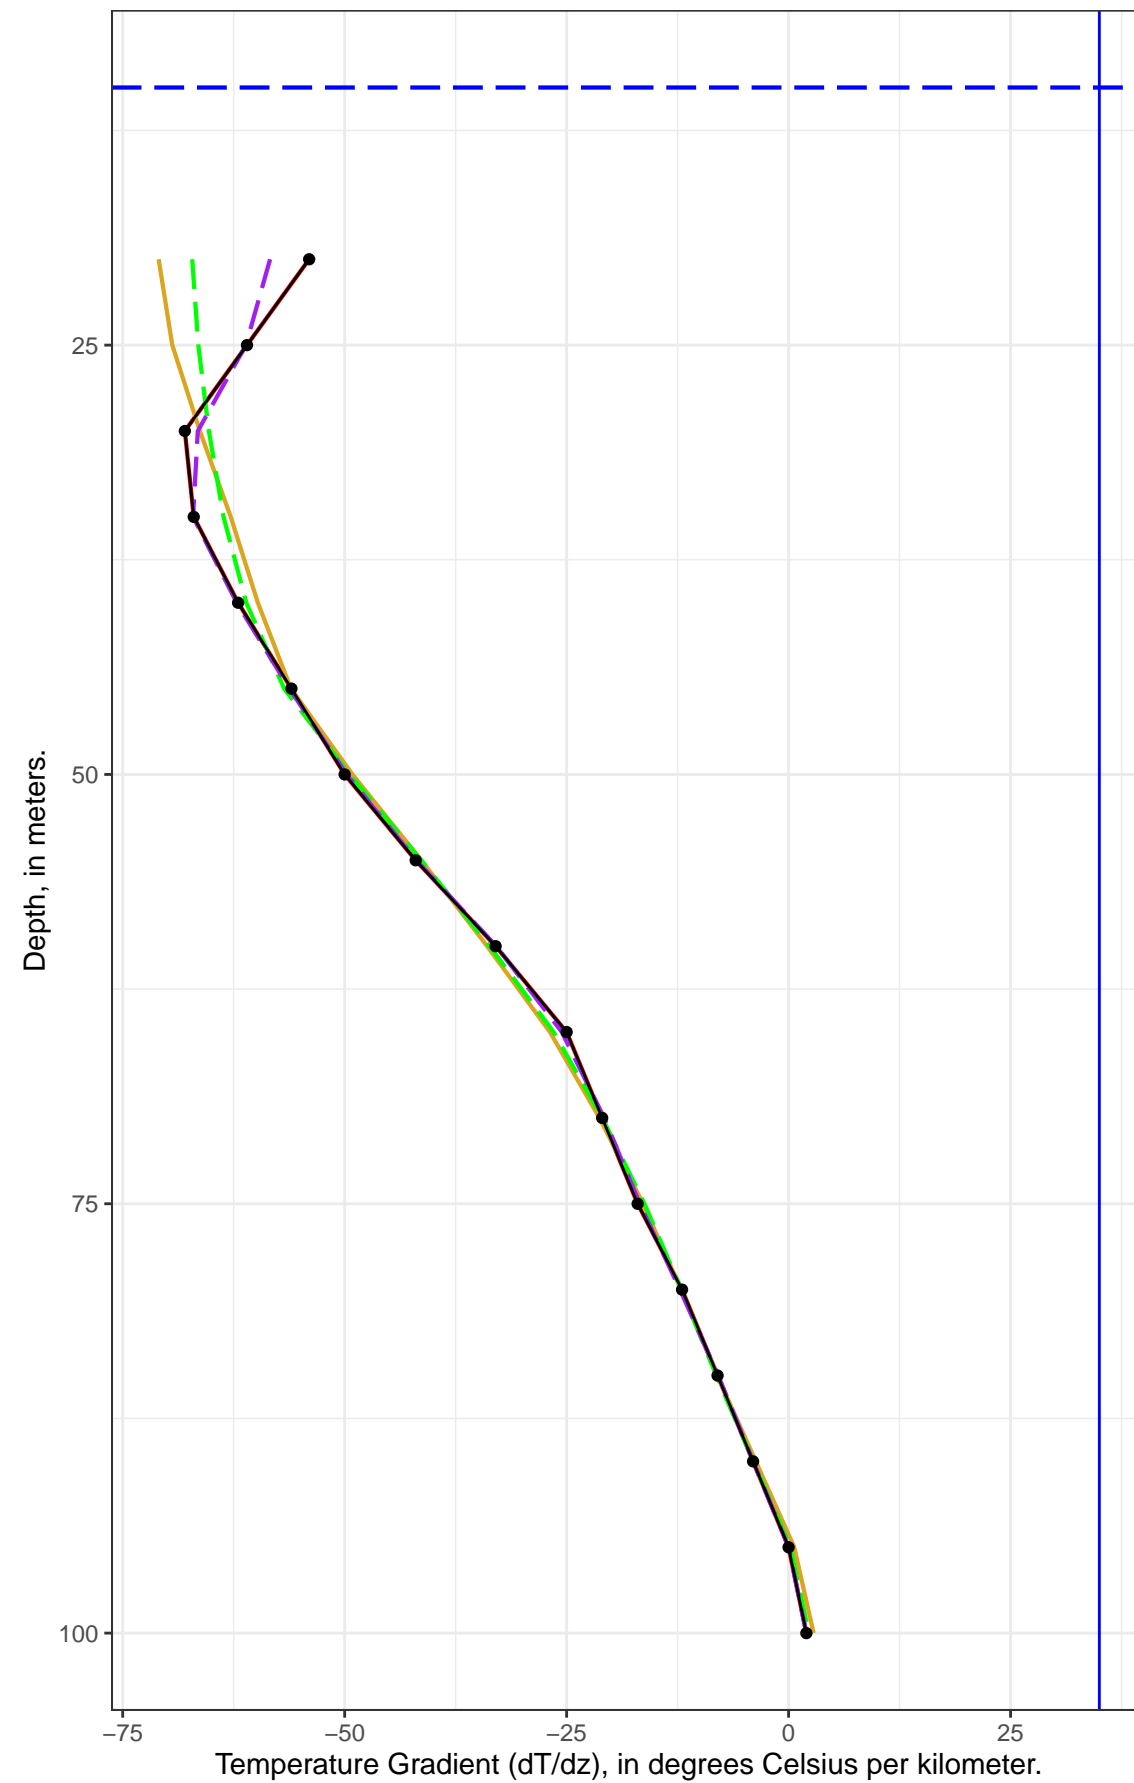

ID: 56 [DA-14] Second Derivative

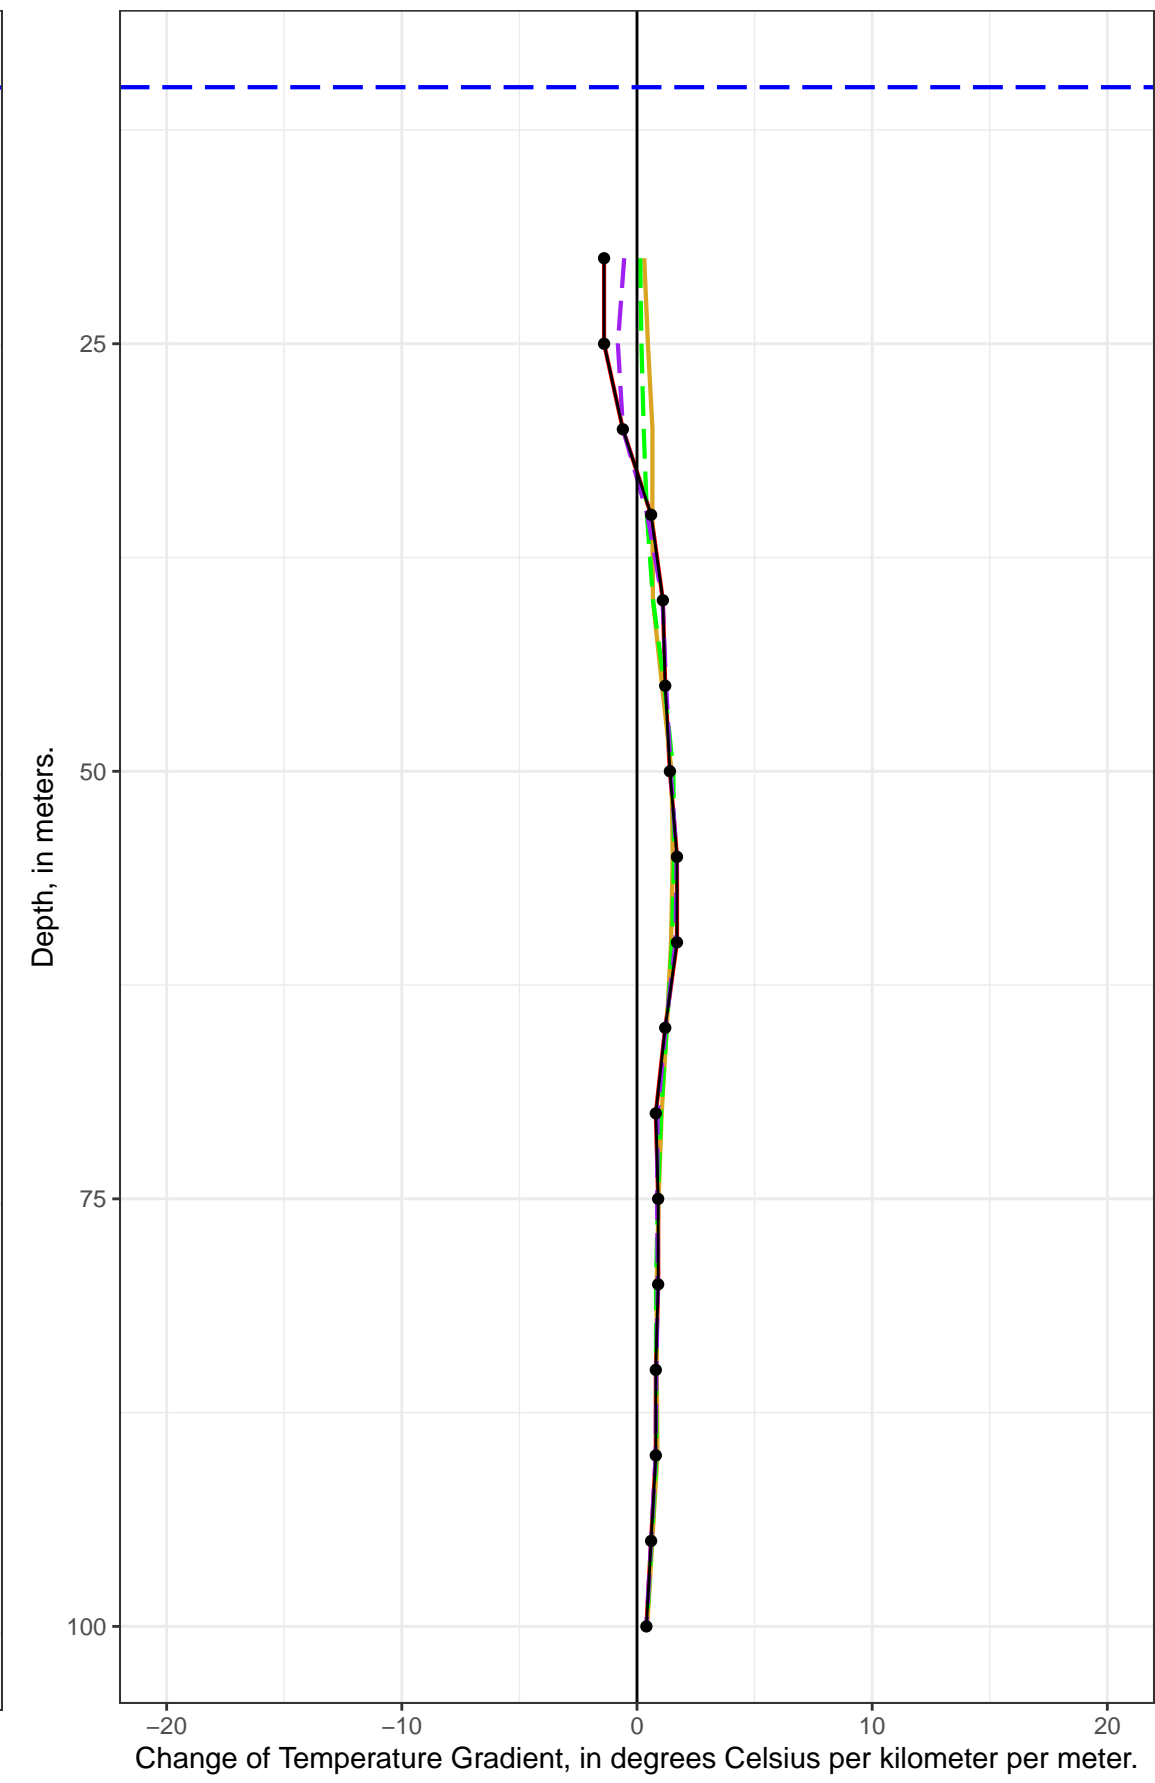

• Data — LOESS (AICC) — LOESS (constant) — LOESS (GCV) — Spline

• Data — LOESS (AICC) — LOESS (constant) — LOESS (GCV) — Spline

• Data — LOESS (AICC) — LOESS (constant) — LOESS (GCV) — Spline

ID: 61 [DA-6] Smoothed Profile

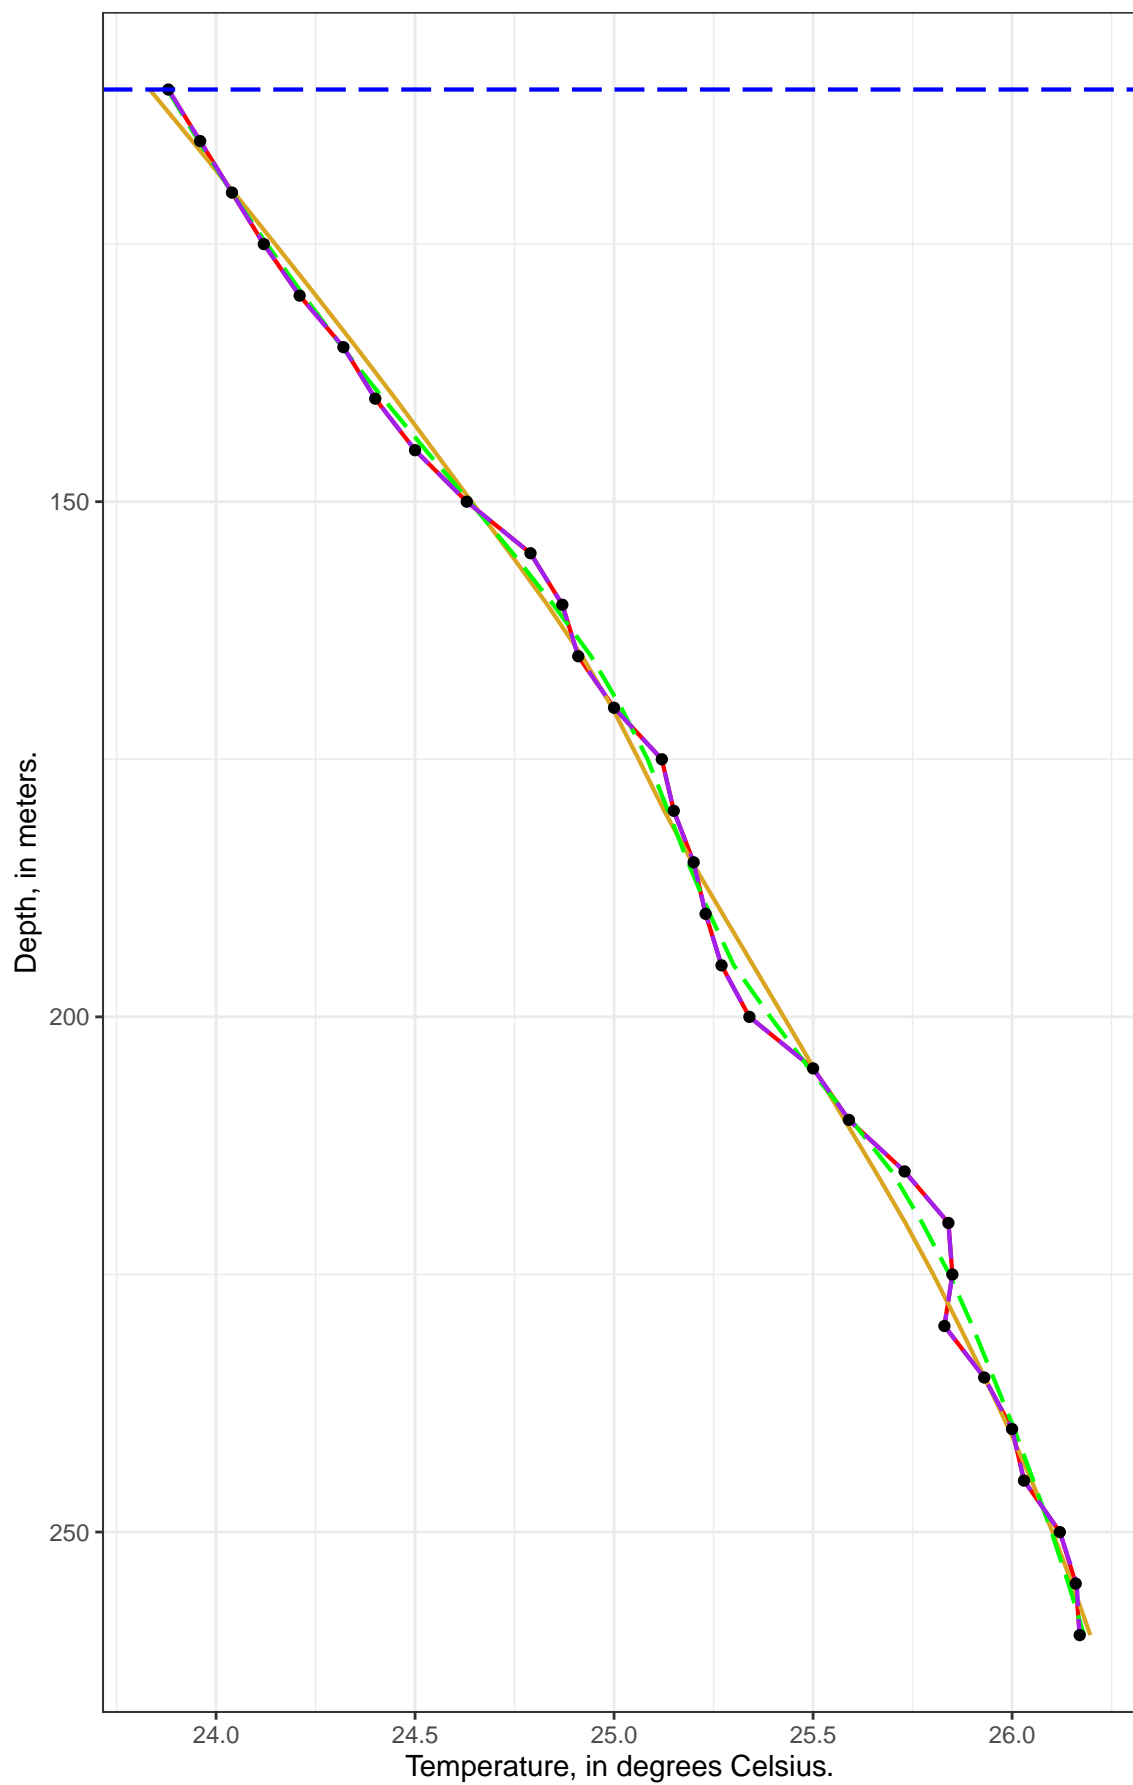

ID: 61 [DA-6] First Derivative

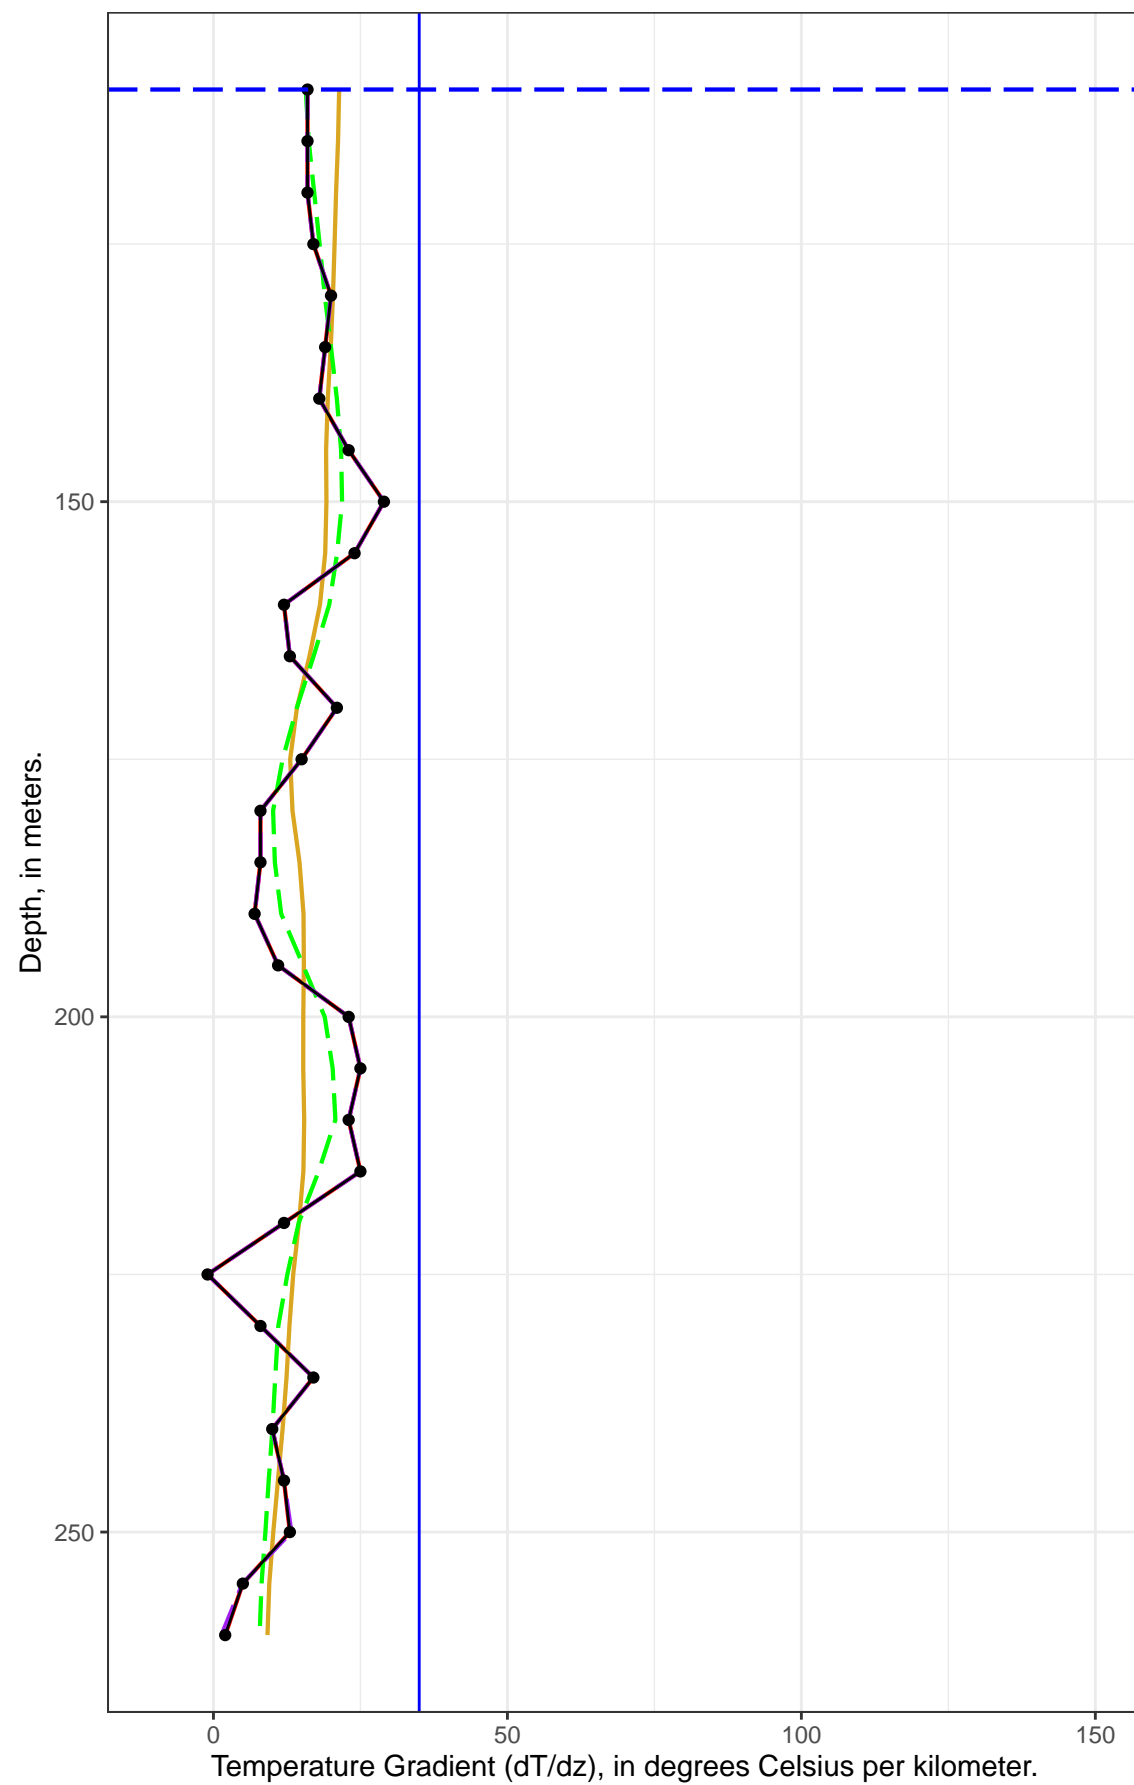

ID: 61 [DA-6] Second Derivative

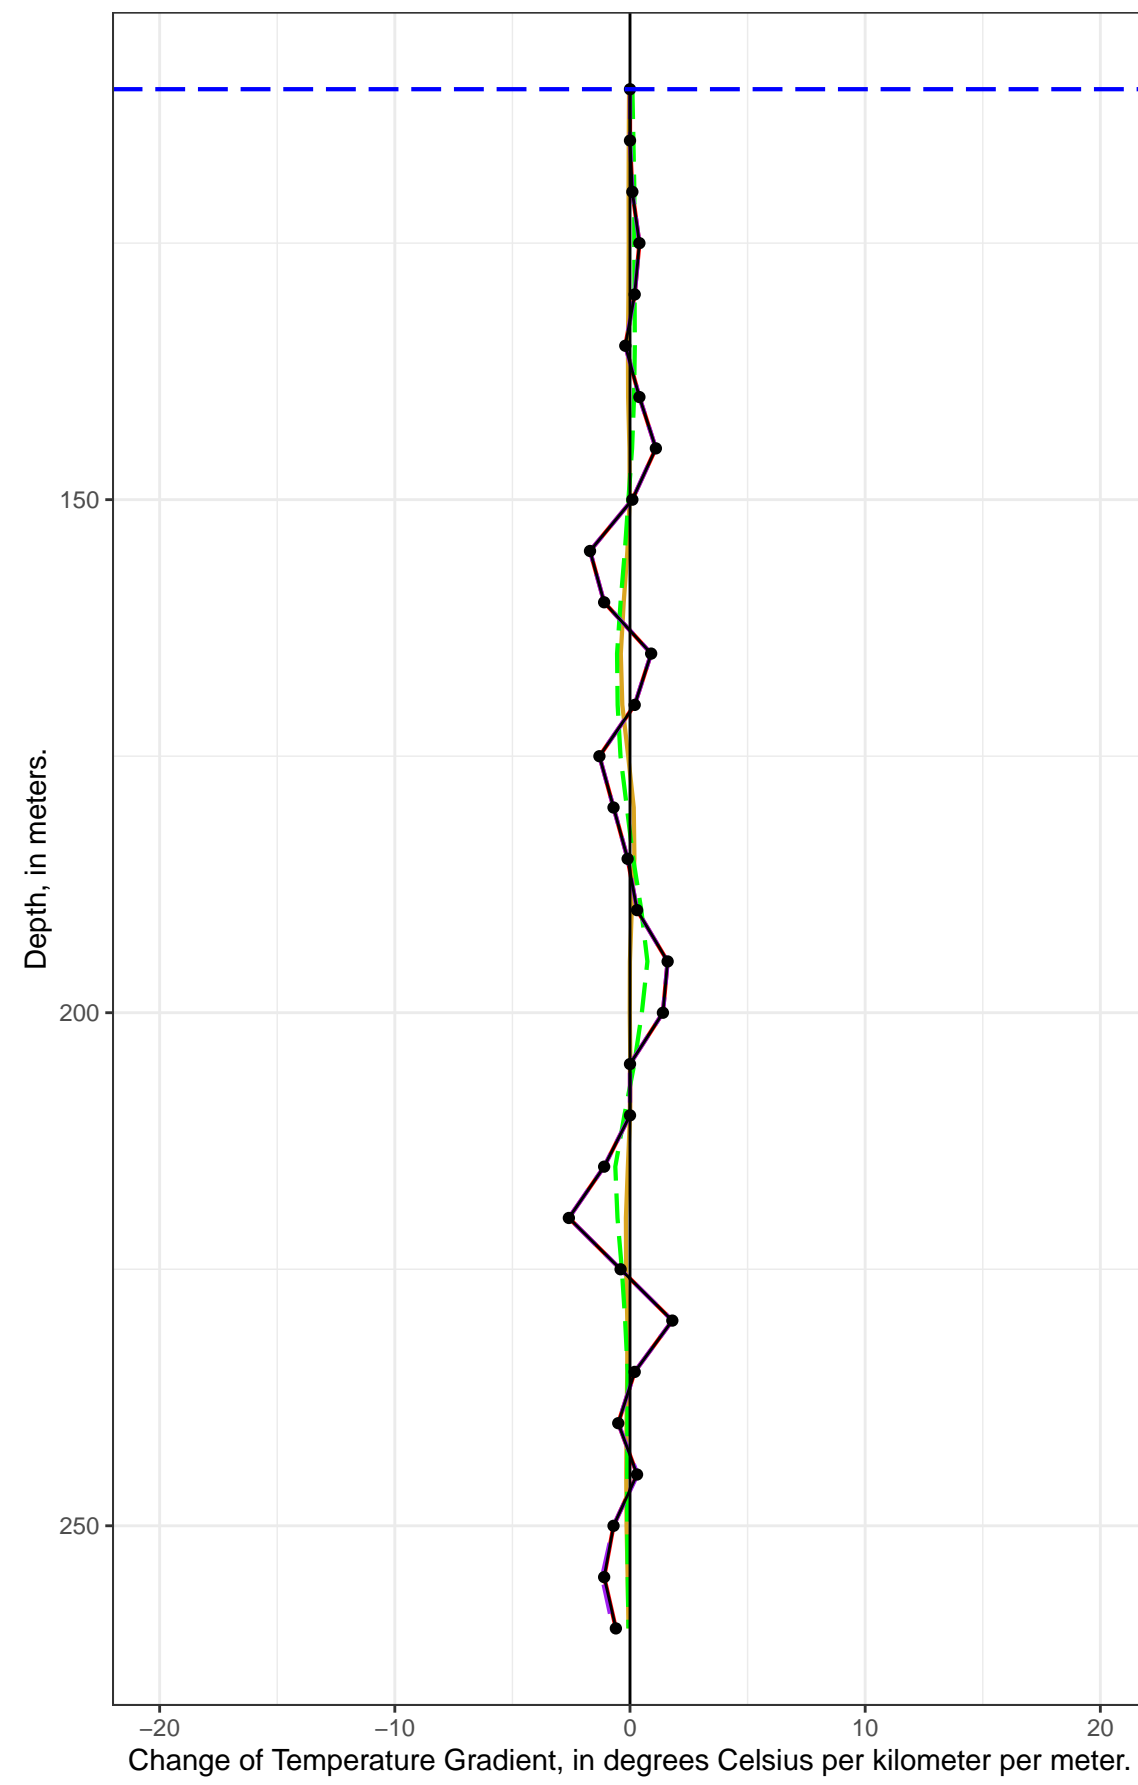

• Data — LOESS (AICC) — LOESS (constant) — LOESS (GCV) — Spline

• Data — LOESS (AICC) — LOESS (constant) — LOESS (GCV) — Spline

• Data — LOESS (AICC) — LOESS (constant) — LOESS (GCV) — Spline



ID: 65 [DT-1\_NMSU-DG-2] Smoothed Profile

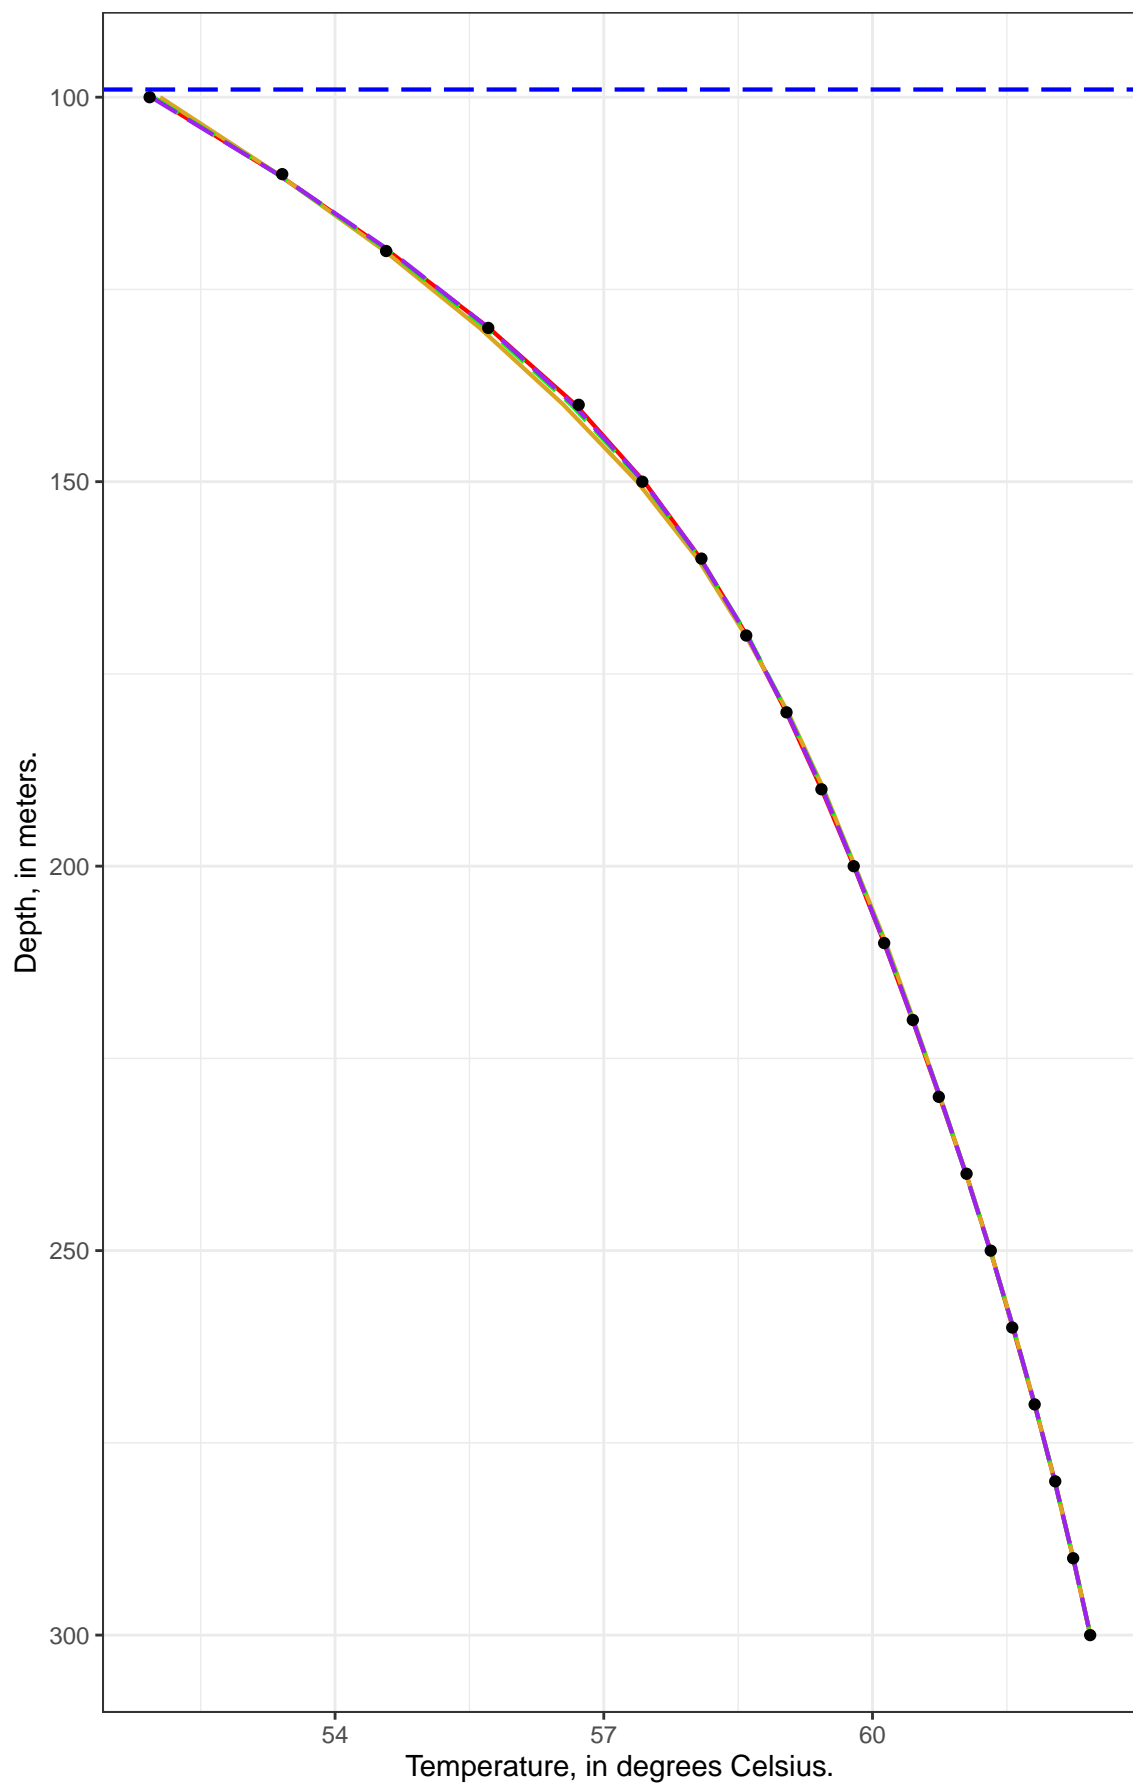

ID: 65 [DT-1\_NMSU-DG-2] First Derivative

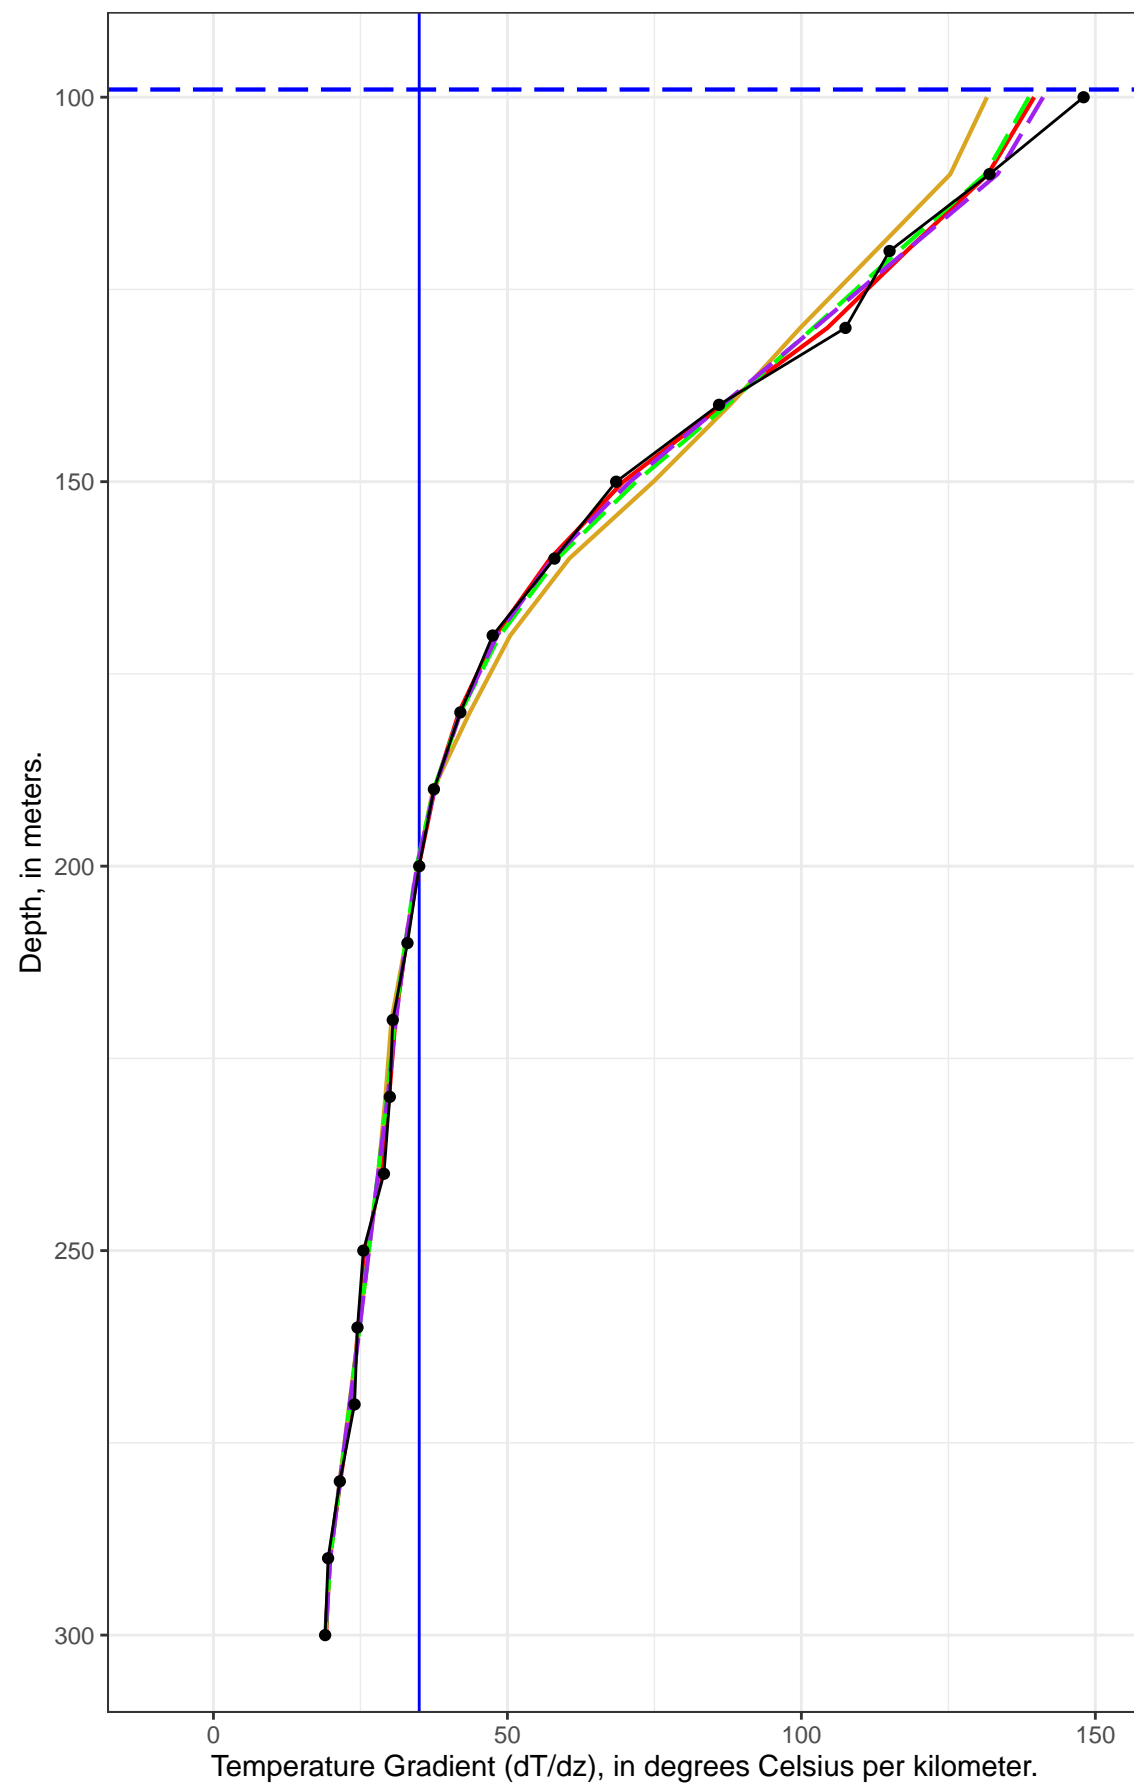

ID: 65 [DT-1\_NMSU-DG-2] Second Derivative

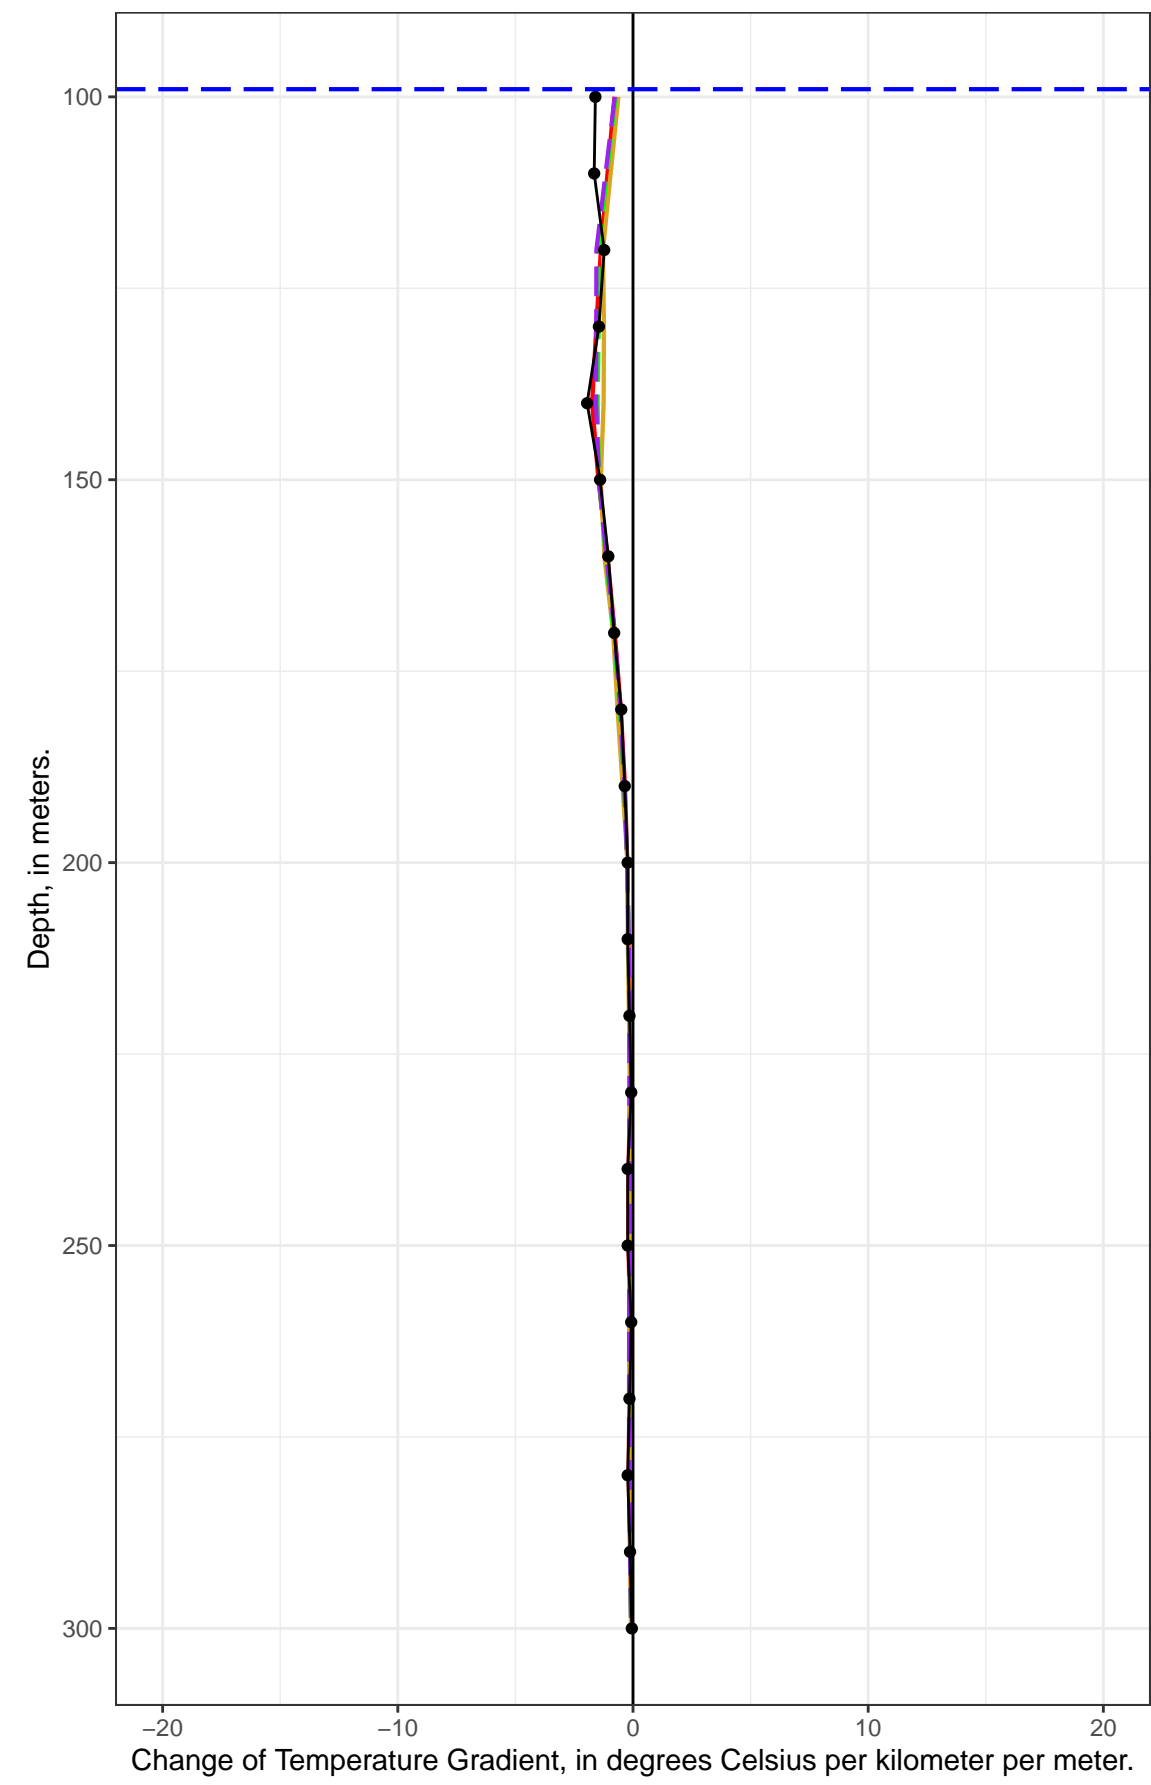

• Data • LOESS (AICC) • LOESS (constant) • LOESS (GCV) • Spline

• Data • LOESS (AICC) • LOESS (constant) • LOESS (GCV) • Spline

• Data • LOESS (AICC) • LOESS (constant) • LOESS (GCV) • Spline

ID: 66 [DT-2\_NMSU-DG-1] Smoothed Profile

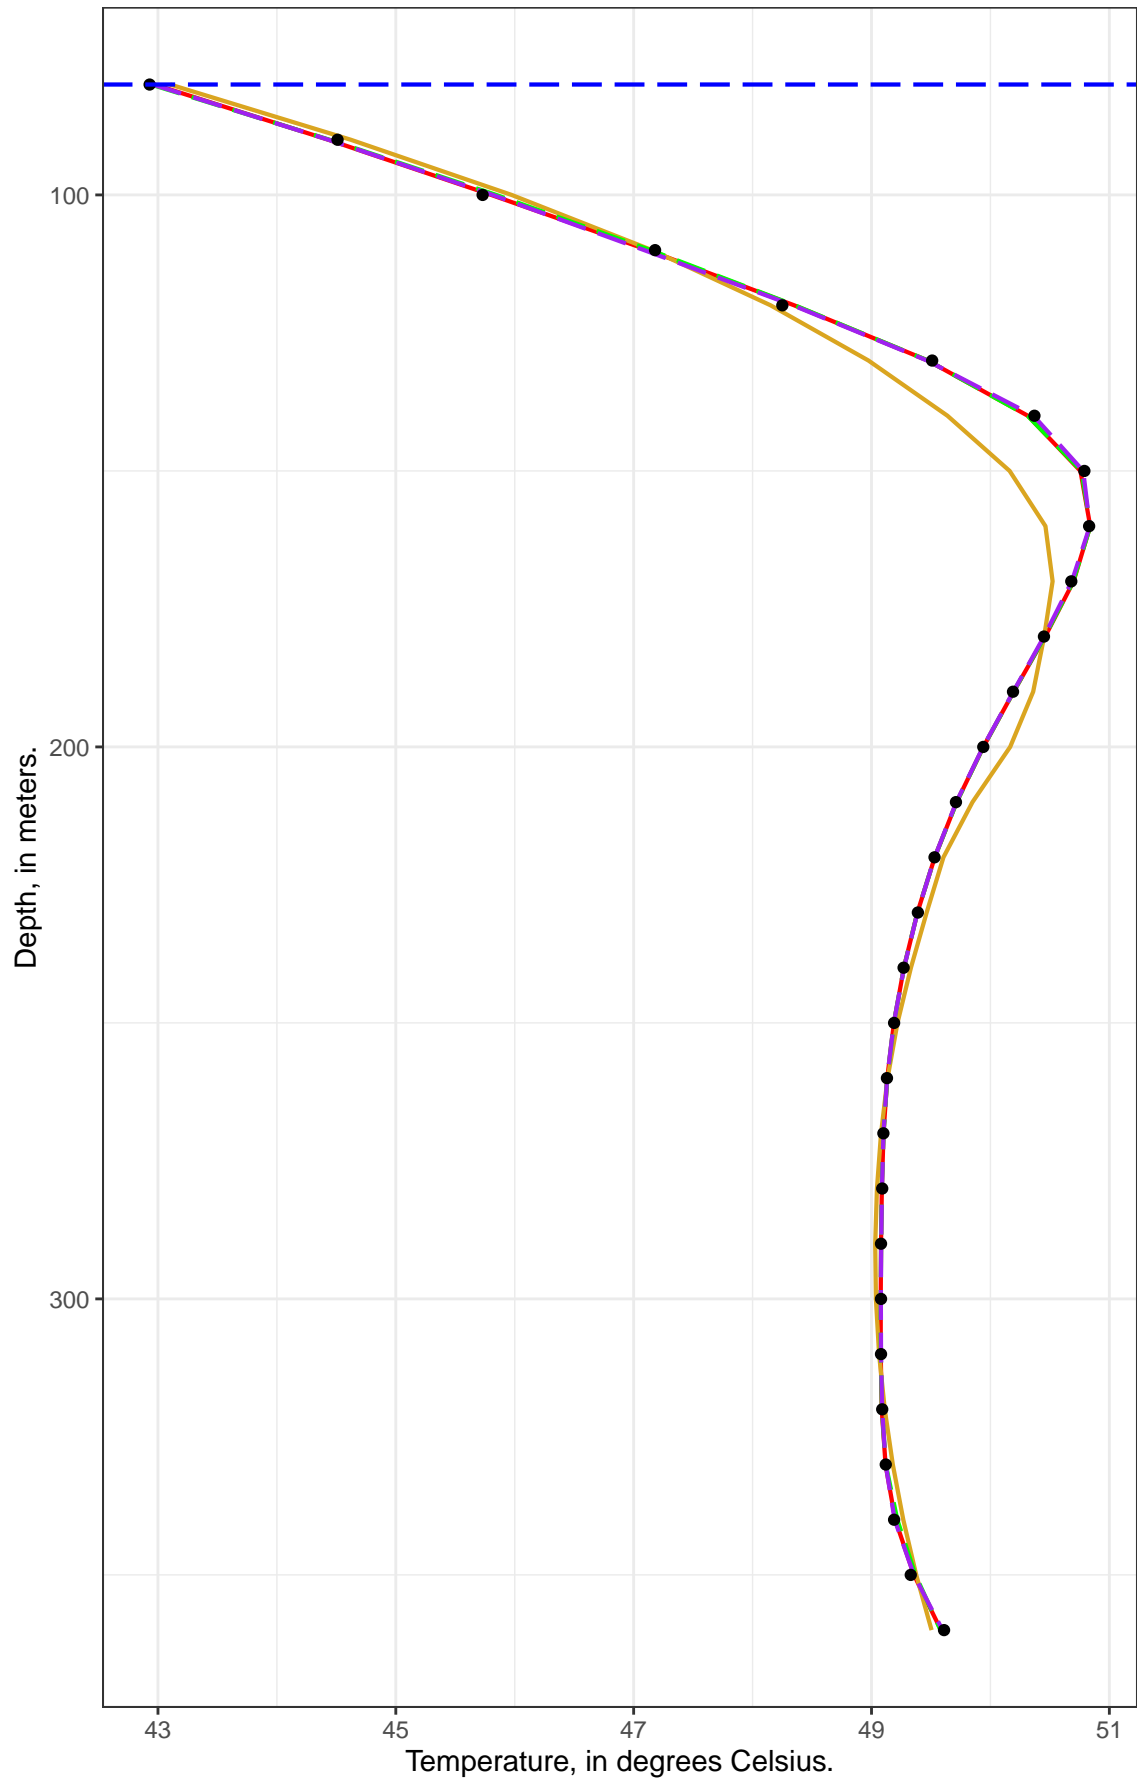

ID: 66 [DT-2\_NMSU-DG-1] First Derivative

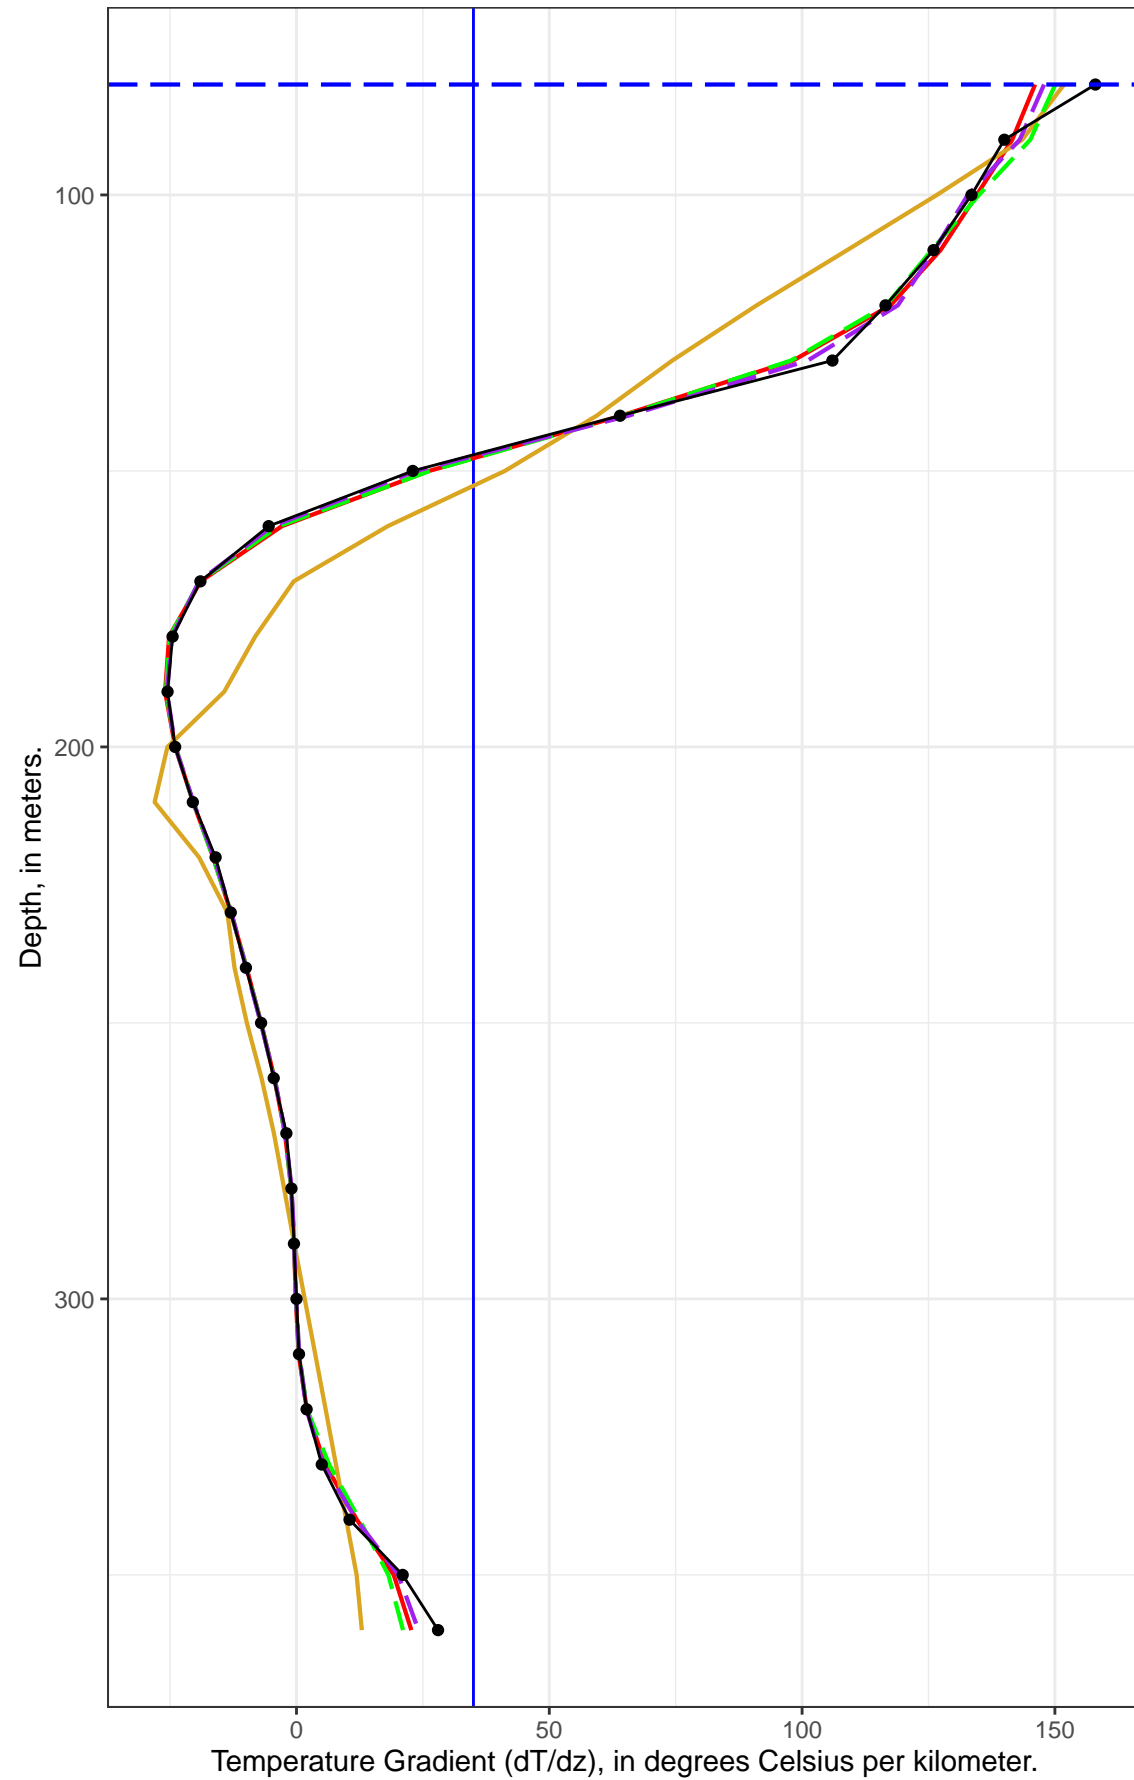

ID: 66 [DT-2\_NMSU-DG-1] Second Derivative

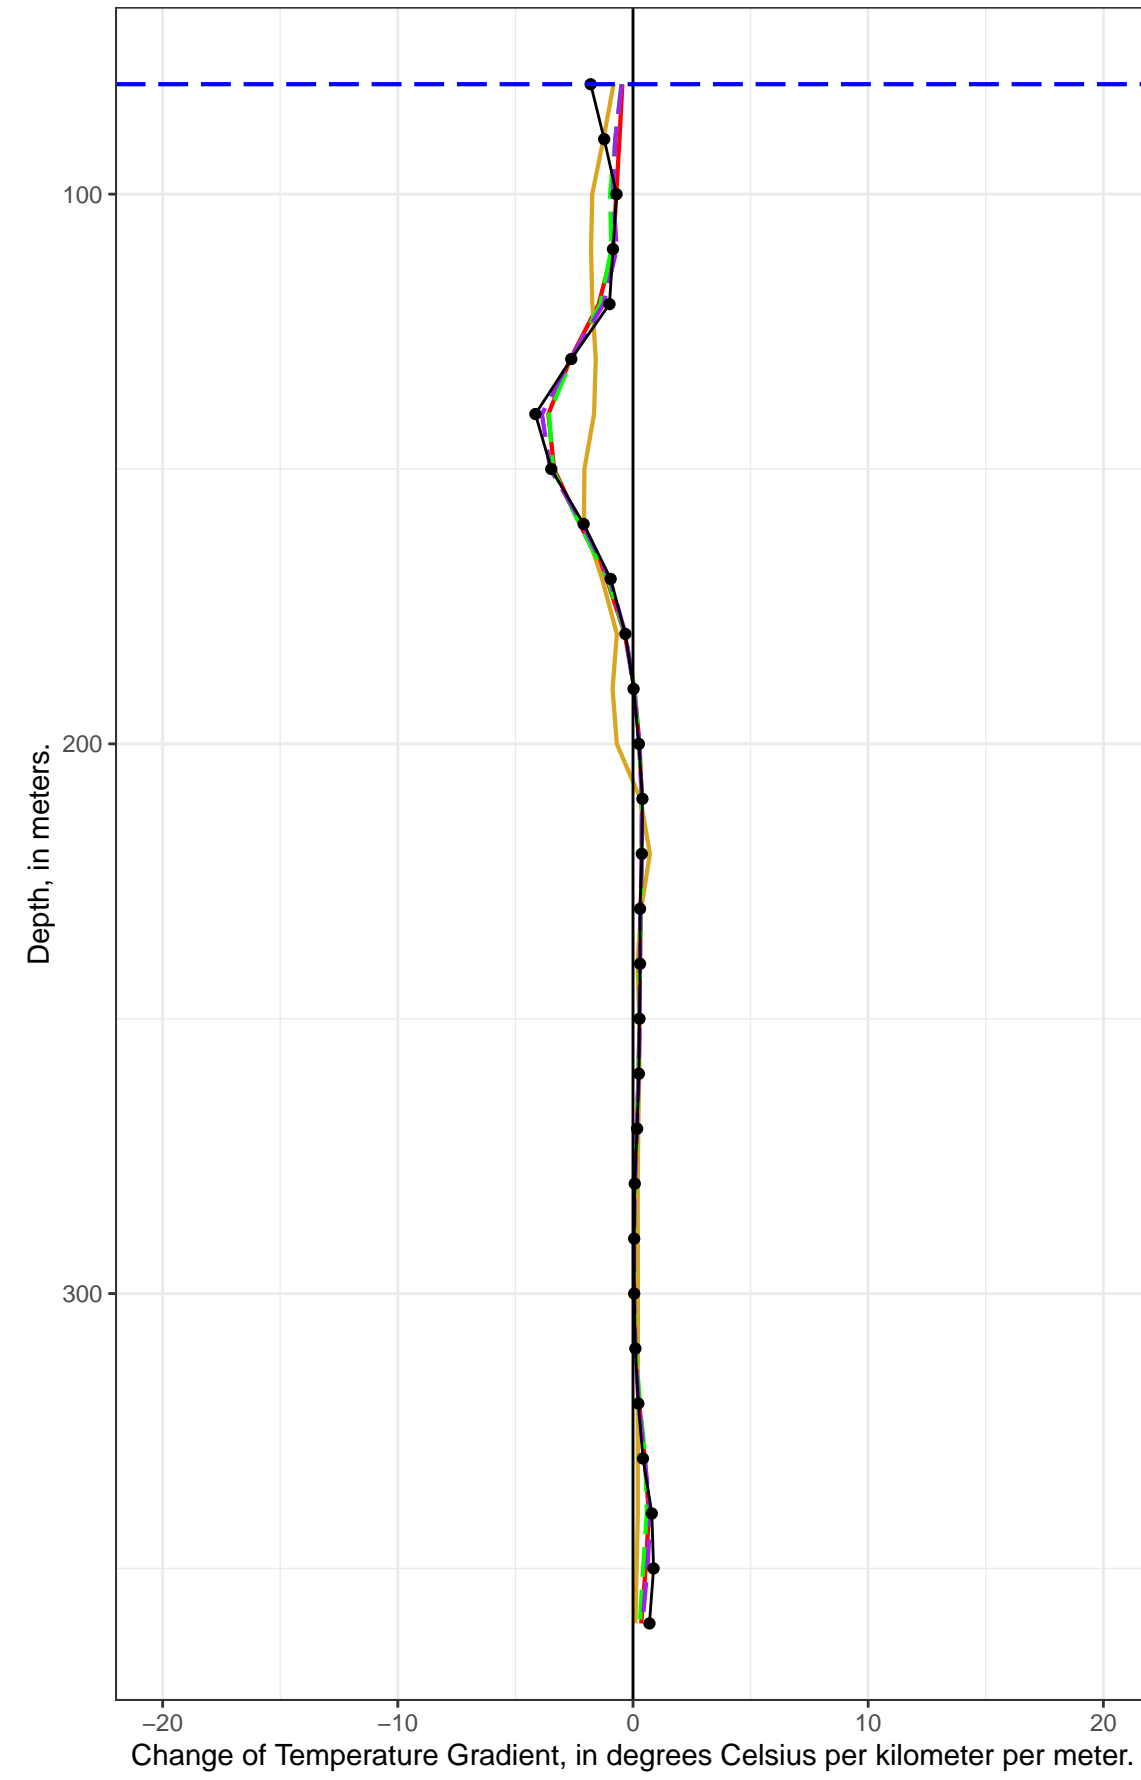

• Data • LOESS (AICC) • LOESS (constant) • LOESS (GCV) • Spline

• Data • LOESS (AICC) • LOESS (constant) • LOESS (GCV) • Spline

• Data • LOESS (AICC) • LOESS (constant) • LOESS (GCV) • Spline

ID: 68 [GS\_Well] Smoothed Profile

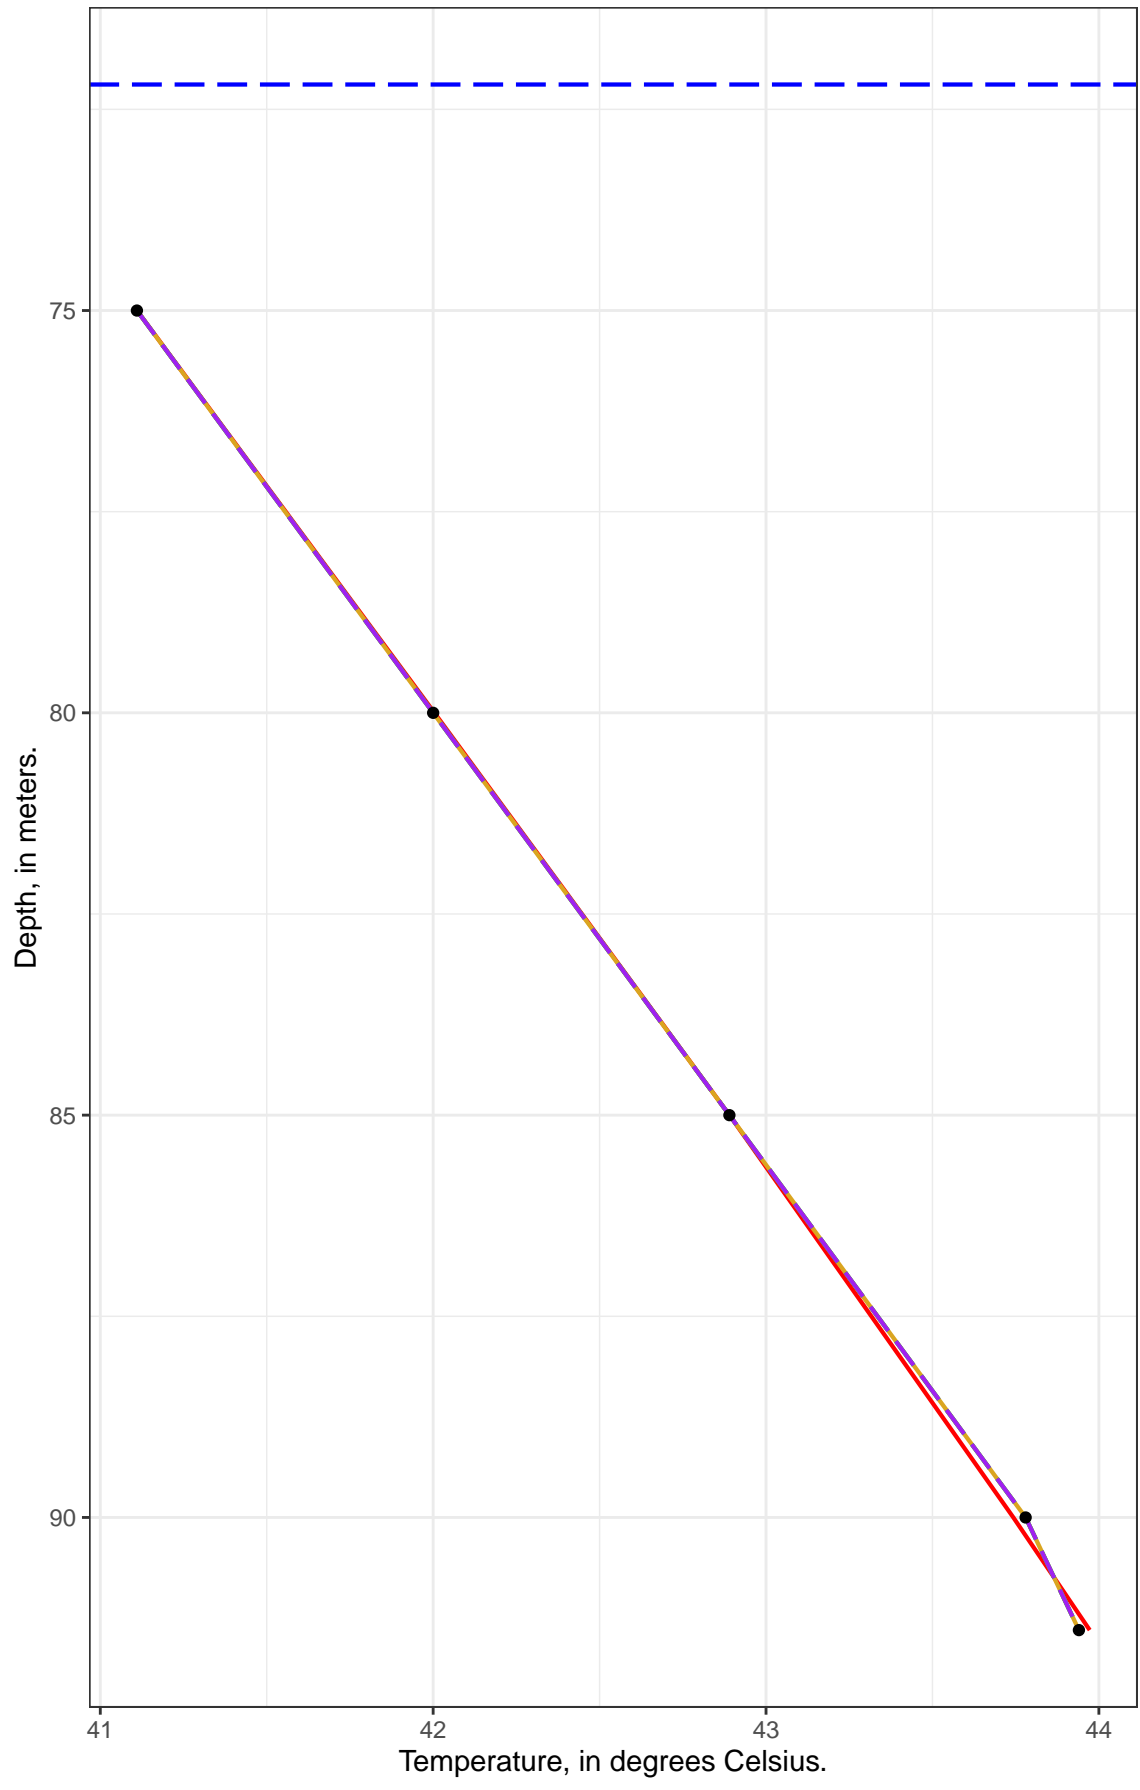

ID: 68 [GS\_Well] First Derivative

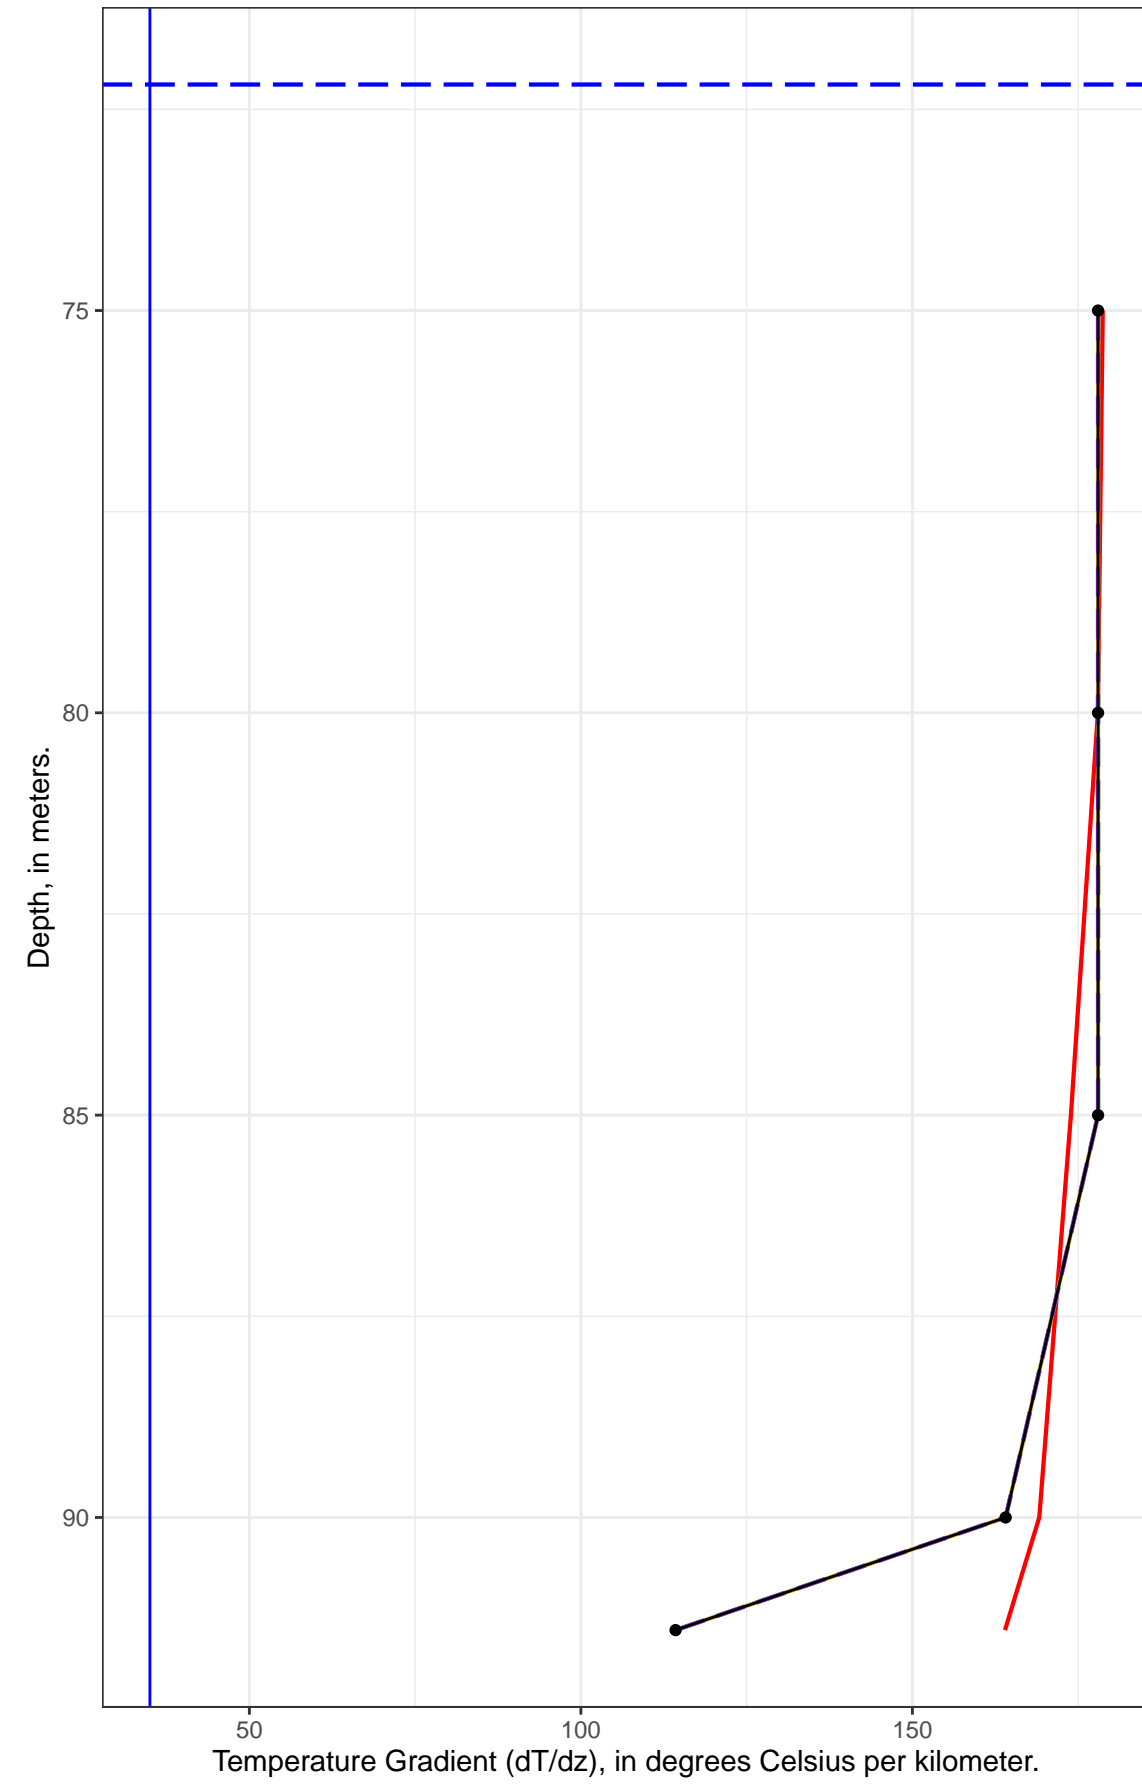

ID: 68 [GS\_Well] Second Derivative

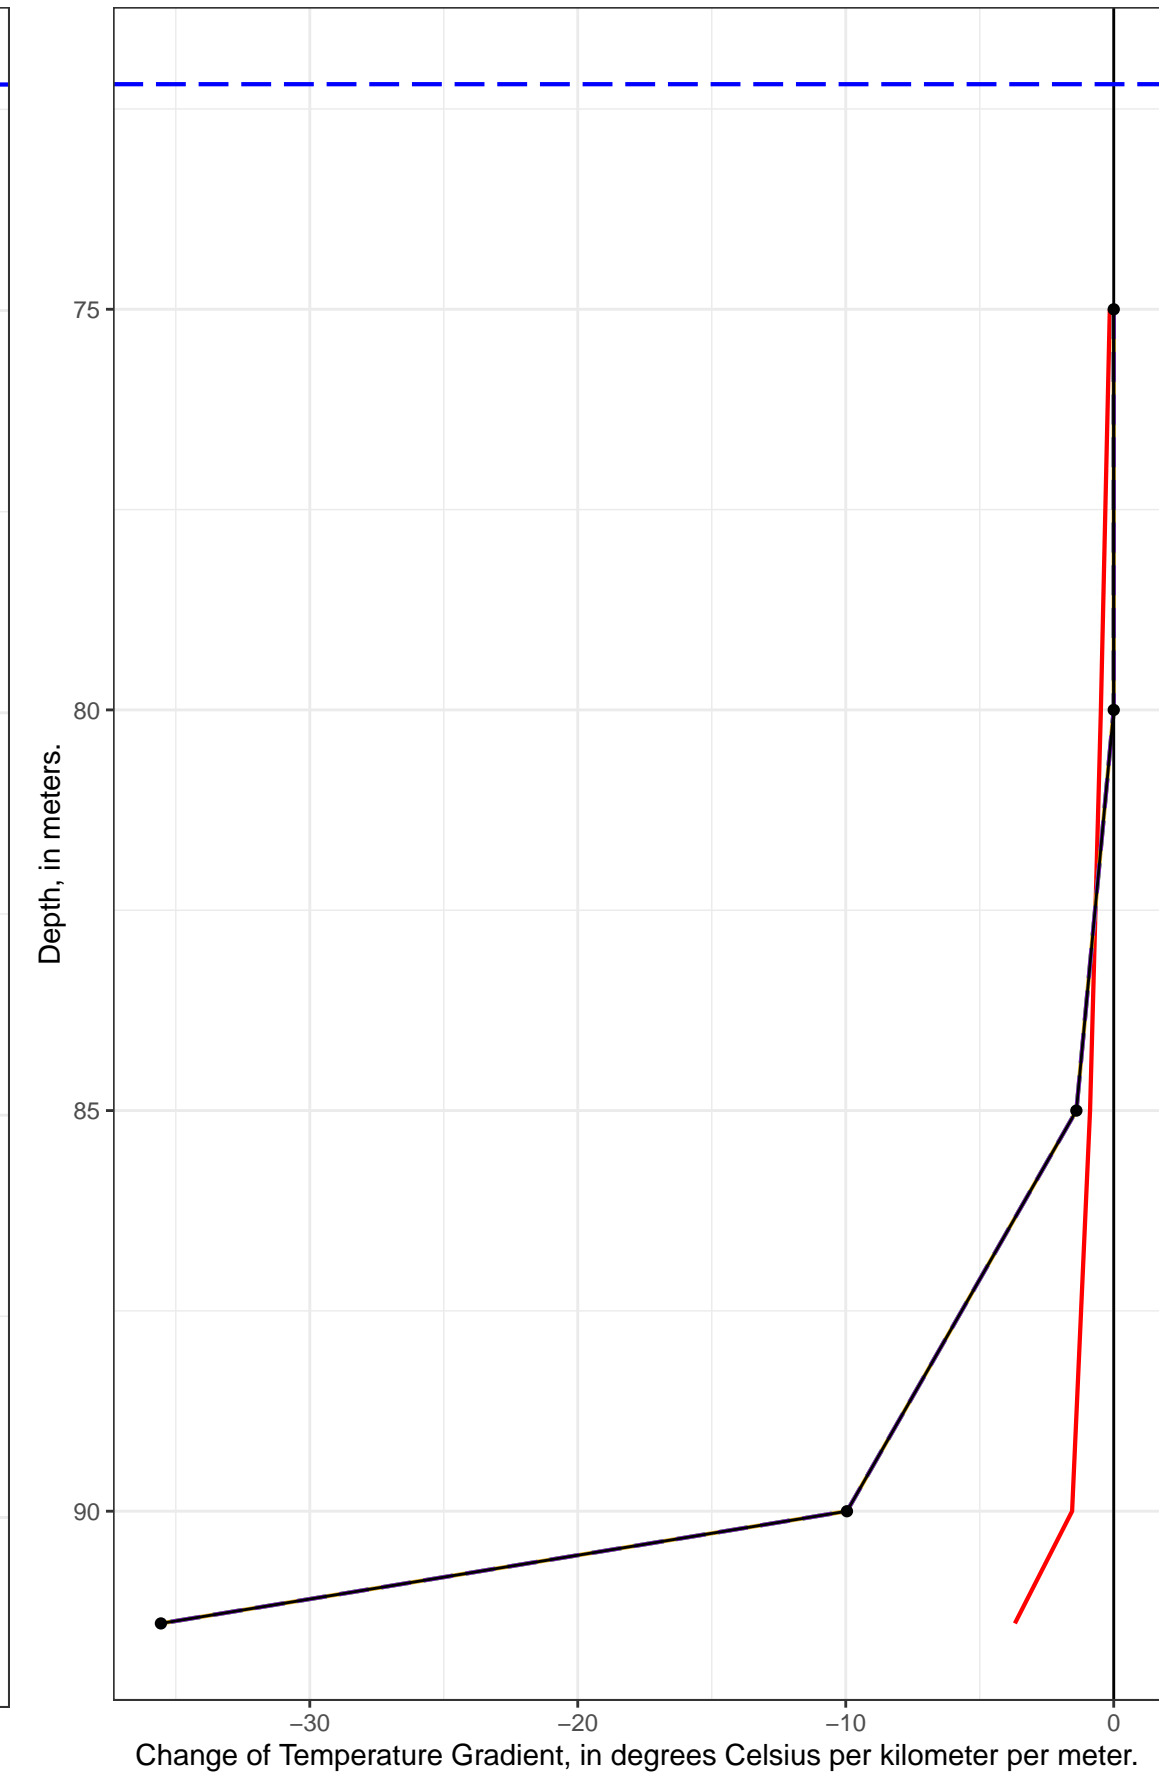

• Data    — LOESS (AICC)    — LOESS (constant)    — LOESS (GCV)    — Spline

• Data    — LOESS (AICC)    — LOESS (constant)    — LOESS (GCV)    — Spline

• Data    — LOESS (AICC)    — LOESS (constant)    — LOESS (GCV)    — Spline

ID: 70 [H-2-80-1411\_KILBOURNE\_HOLE] Smoothed Profile

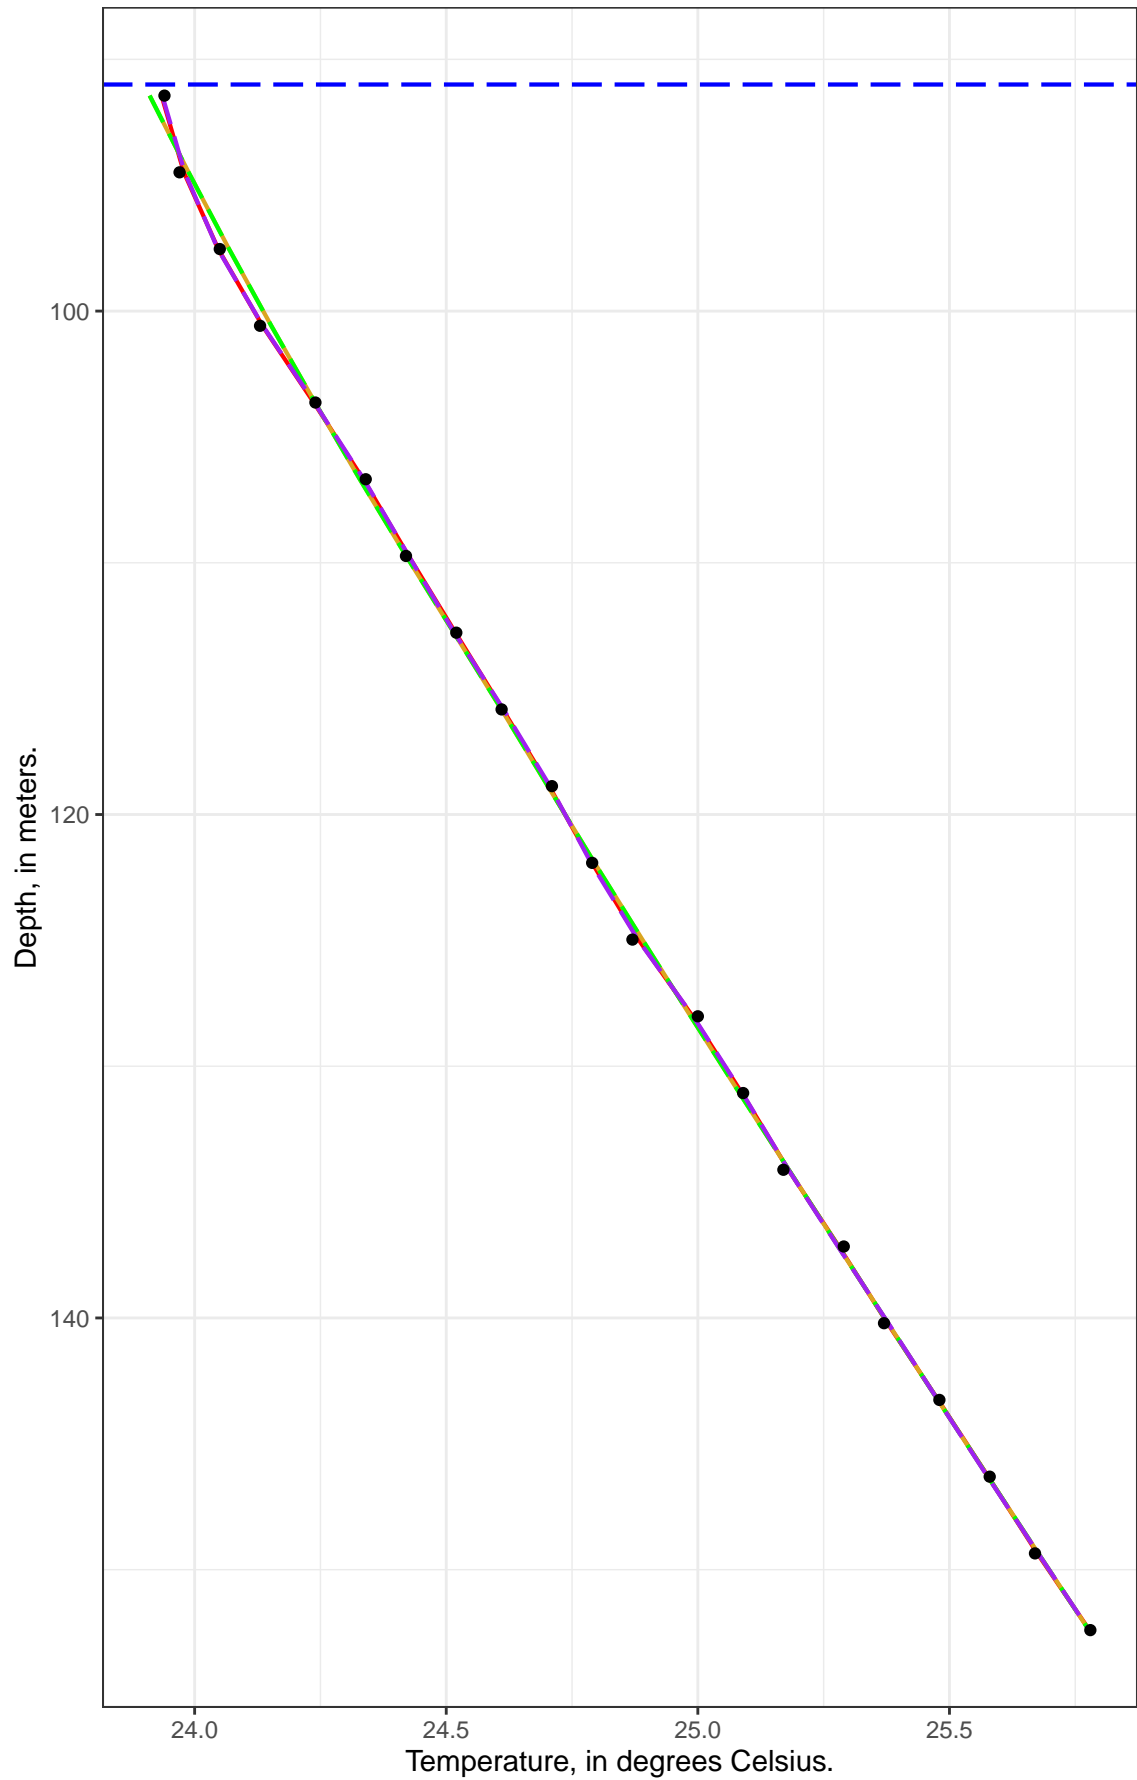

ID: 70 [H-2-80-1411\_KILBOURNE\_HOLE] First Derivative

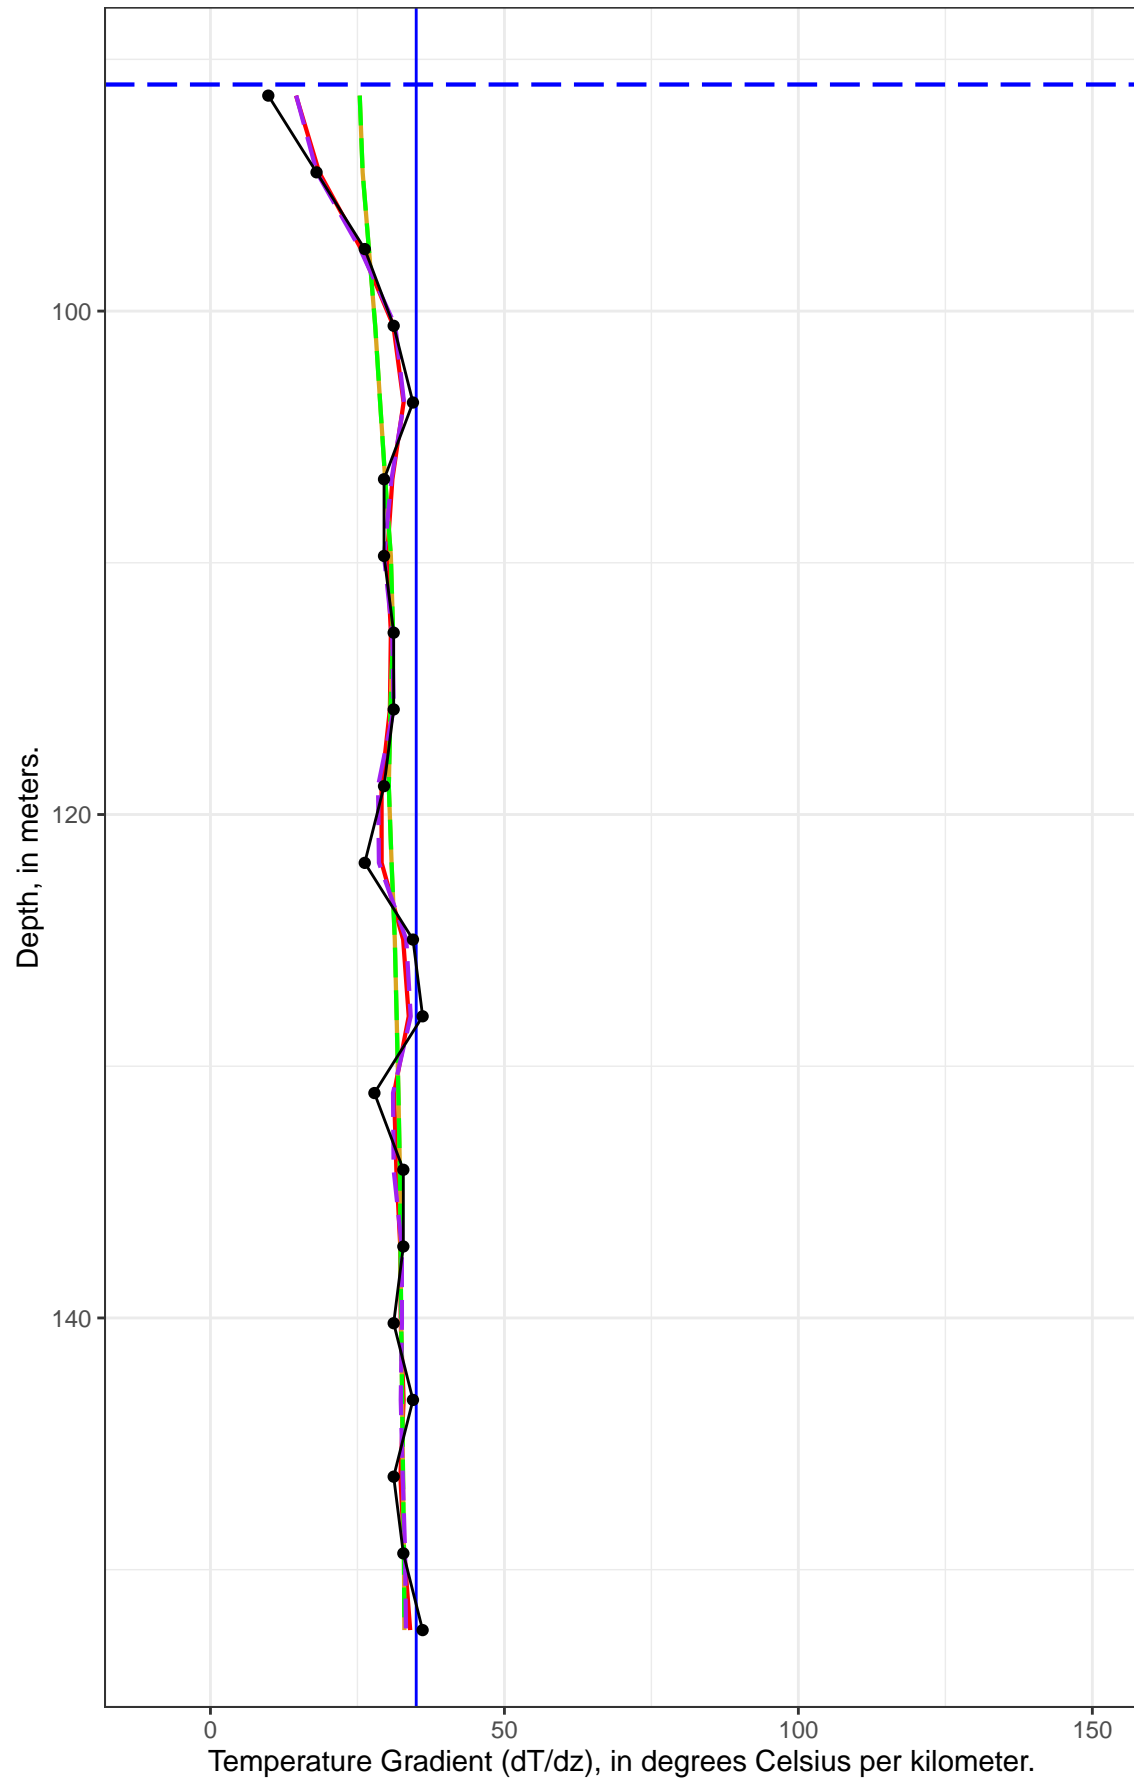

ID: 70 [H-2-80-1411\_KILBOURNE\_HOLE] Second Derivative

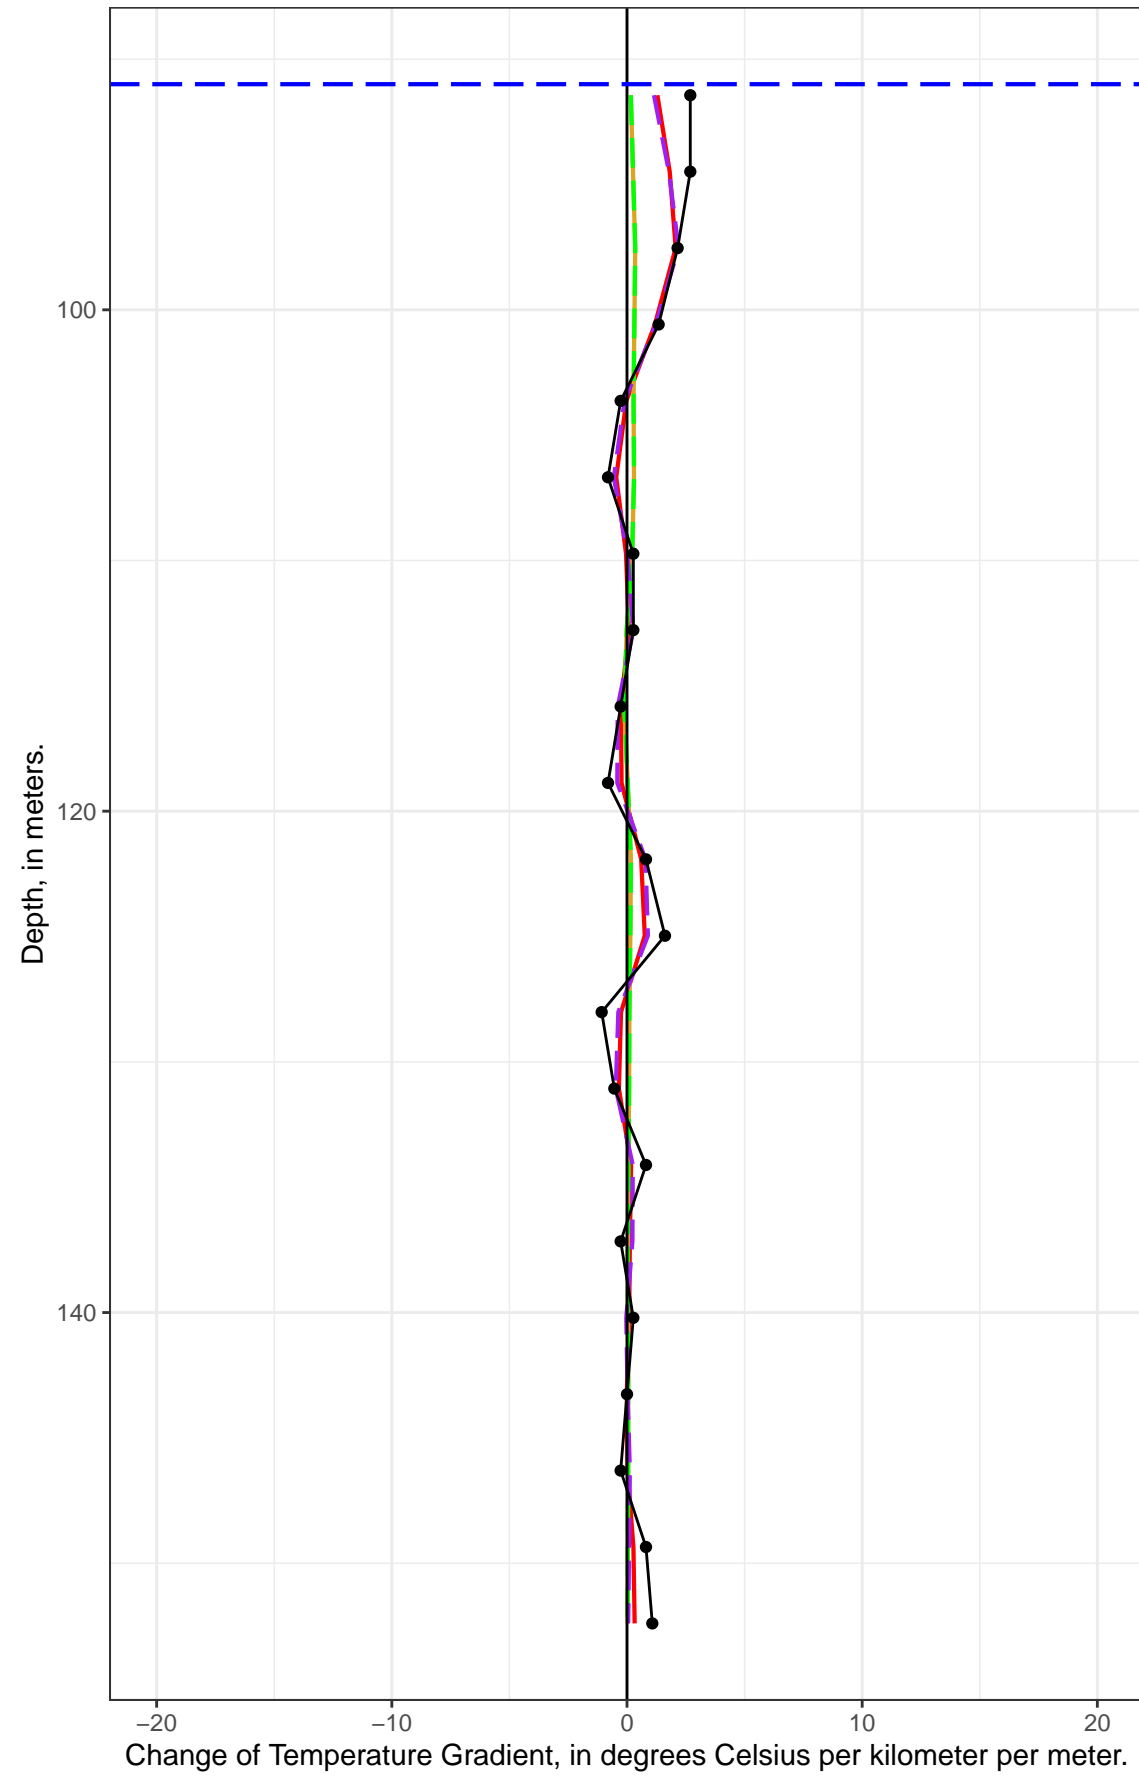

• Data • LOESS (AICC) • LOESS (constant) • LOESS (GCV) • Spline

• Data • LOESS (AICC) • LOESS (constant) • LOESS (GCV) • Spline

• Data • LOESS (AICC) • LOESS (constant) • LOESS (GCV) • Spline

ID: 71 [H-2-80-1412\_KILBOURNE\_HOLE] Smoothed Profile

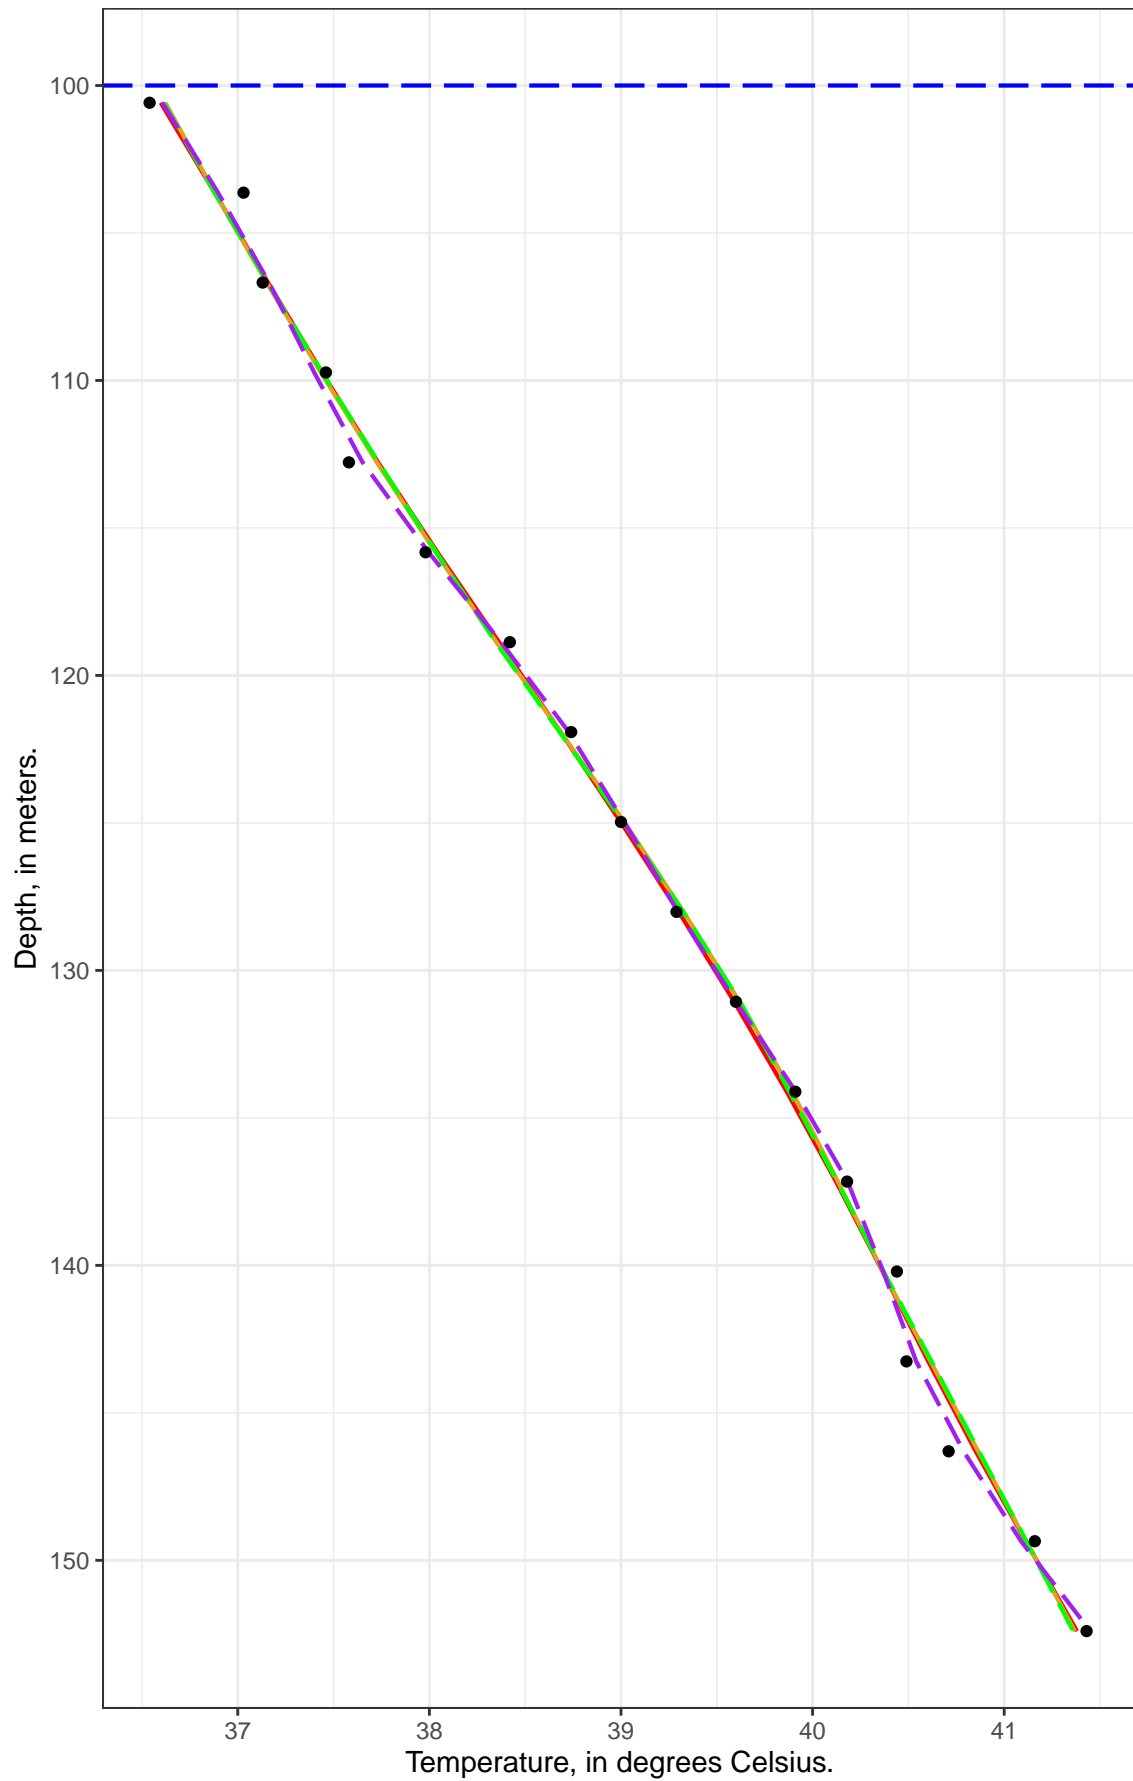

ID: 71 [H-2-80-1412\_KILBOURNE\_HOLE] First Derivative

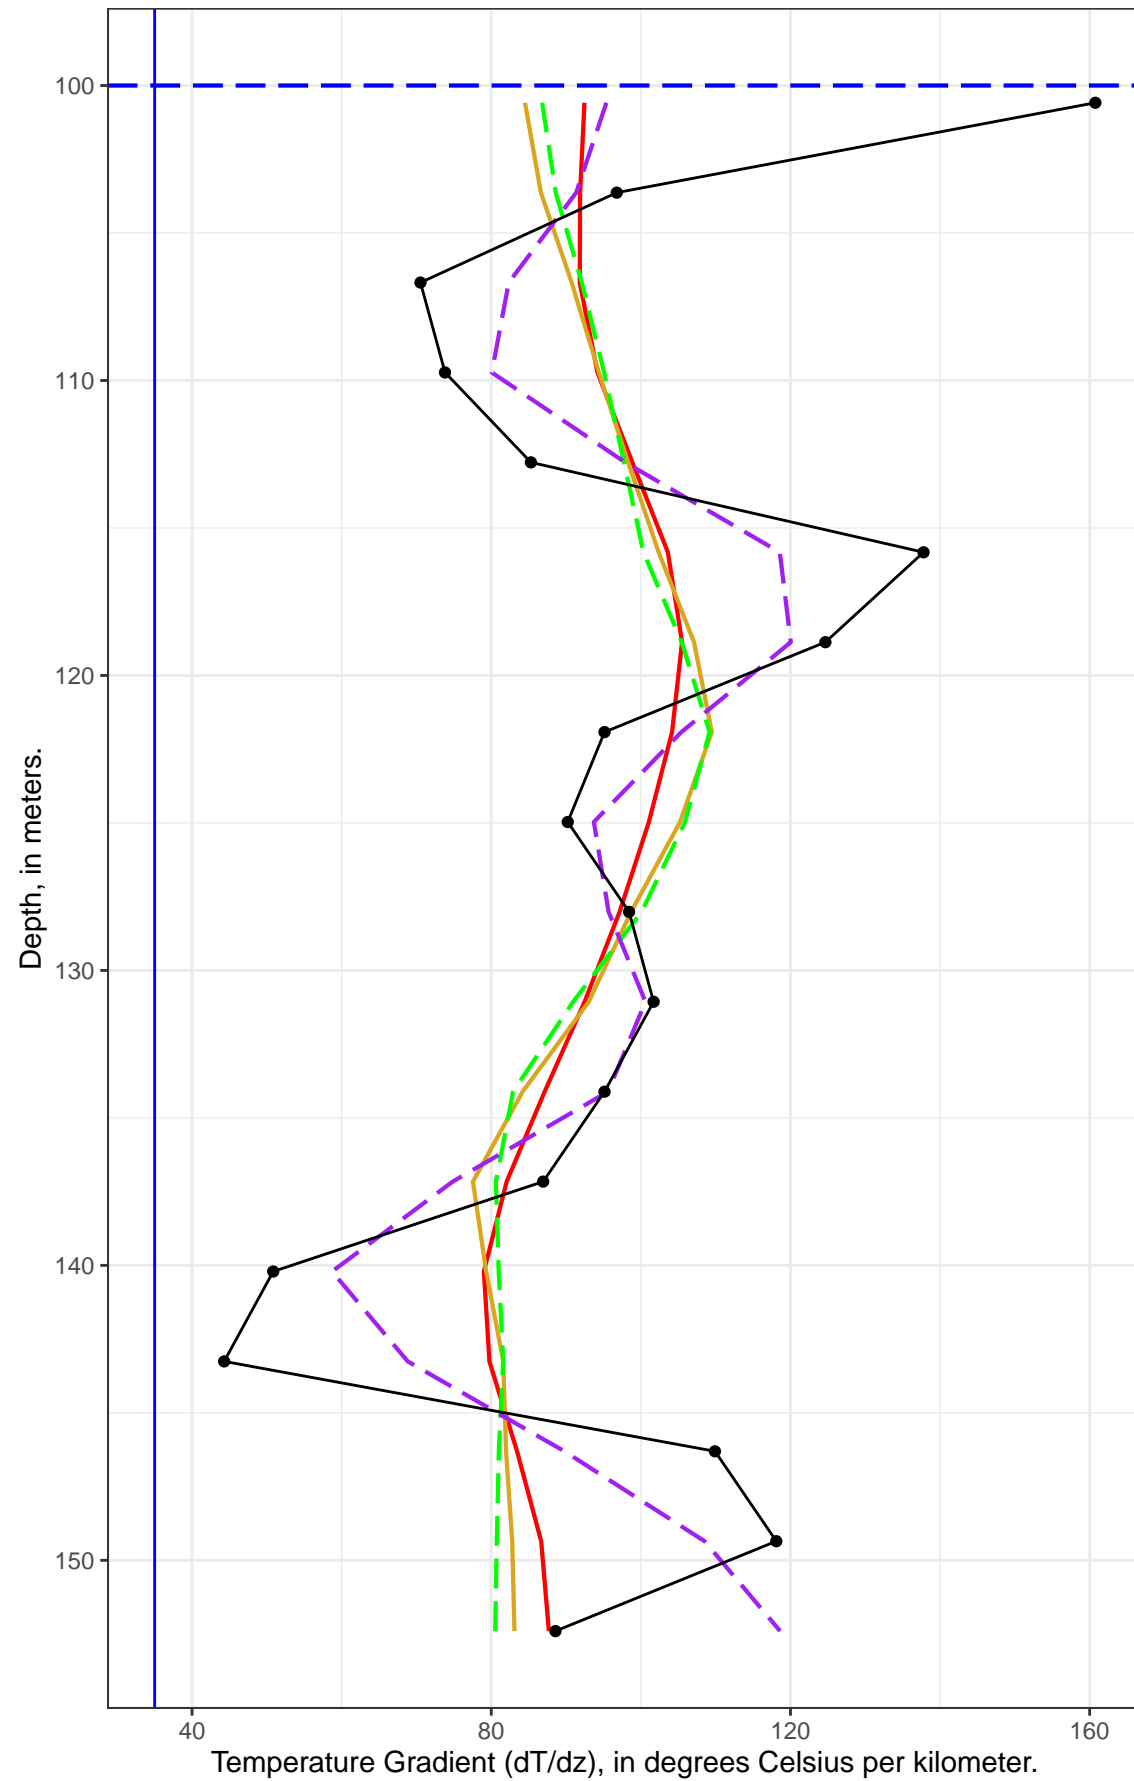

ID: 71 [H-2-80-1412\_KILBOURNE\_HOLE] Second Derivative

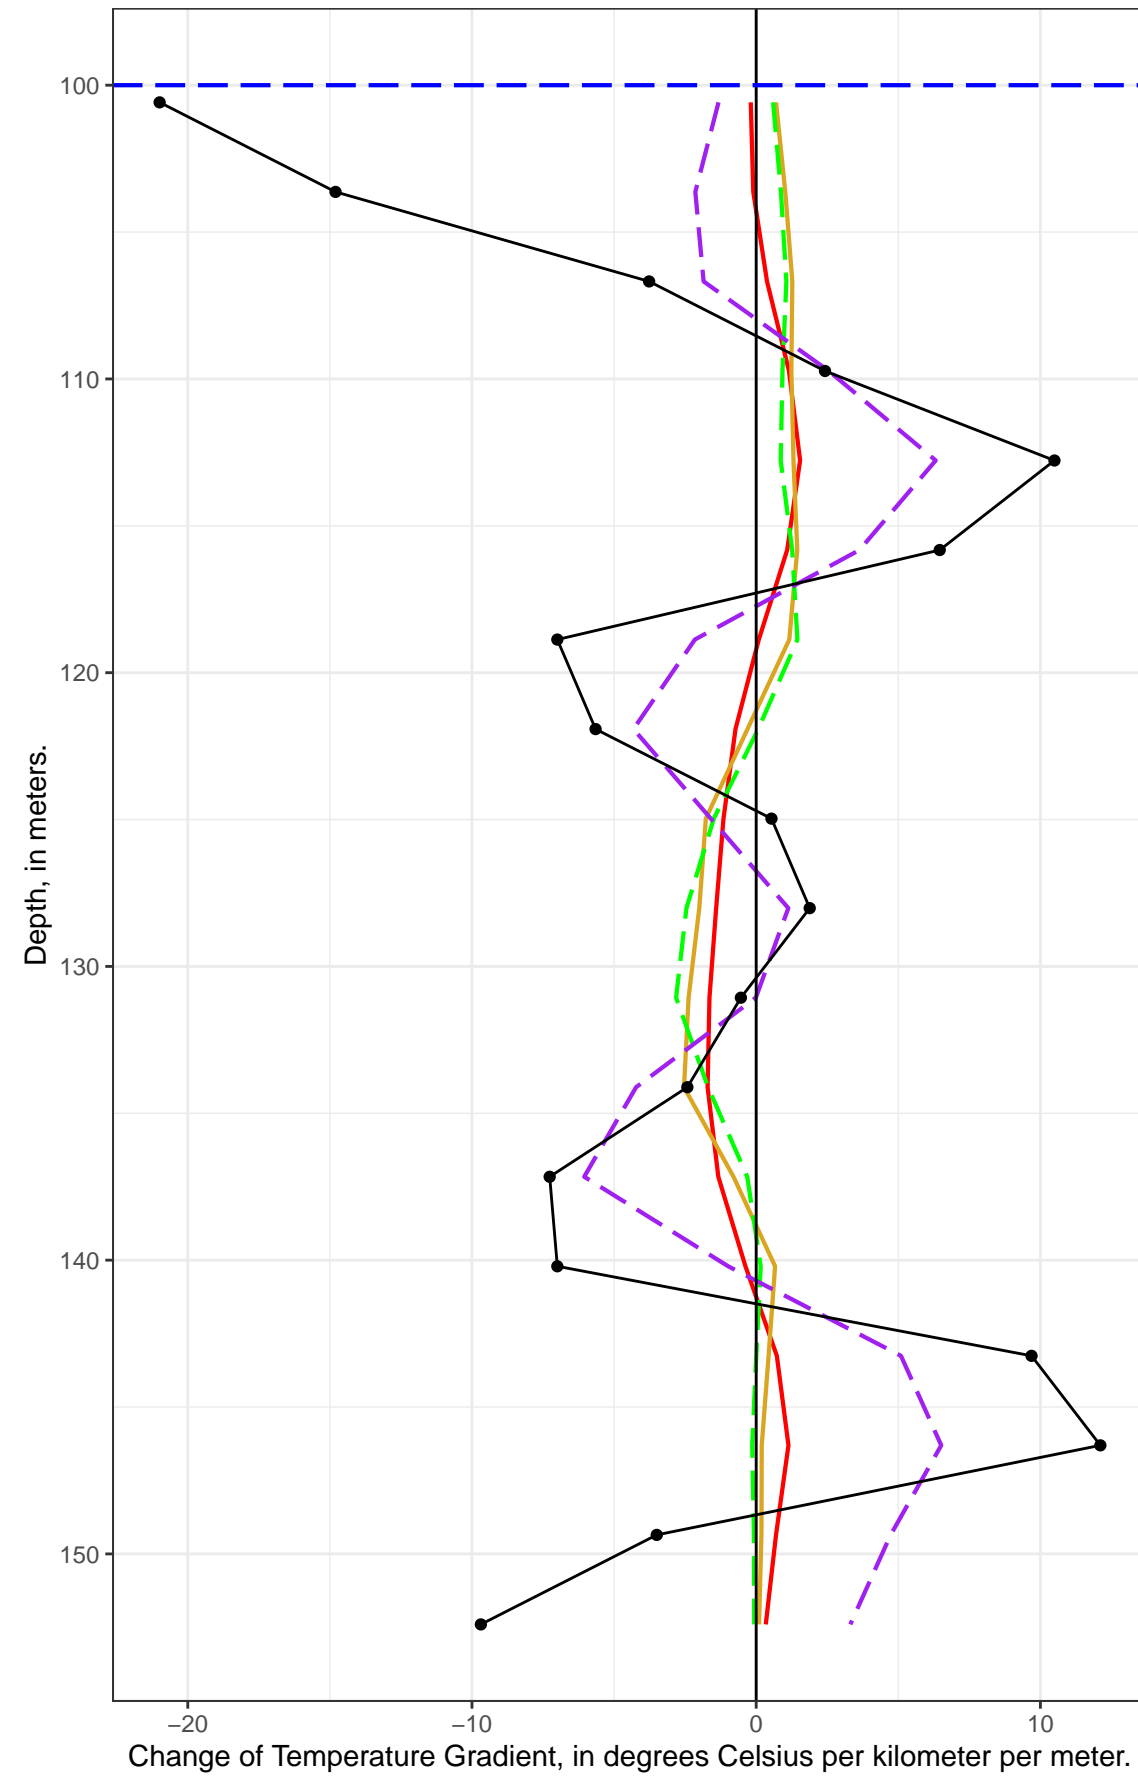

• Data • LOESS (AICC) • LOESS (constant) • LOESS (GCV) • Spline

• Data • LOESS (AICC) • LOESS (constant) • LOESS (GCV) • Spline

• Data • LOESS (AICC) • LOESS (constant) • LOESS (GCV) • Spline

ID: 72 [H-2-80-1417\_KILBOURNE\_HOLE] Smoothed Profile

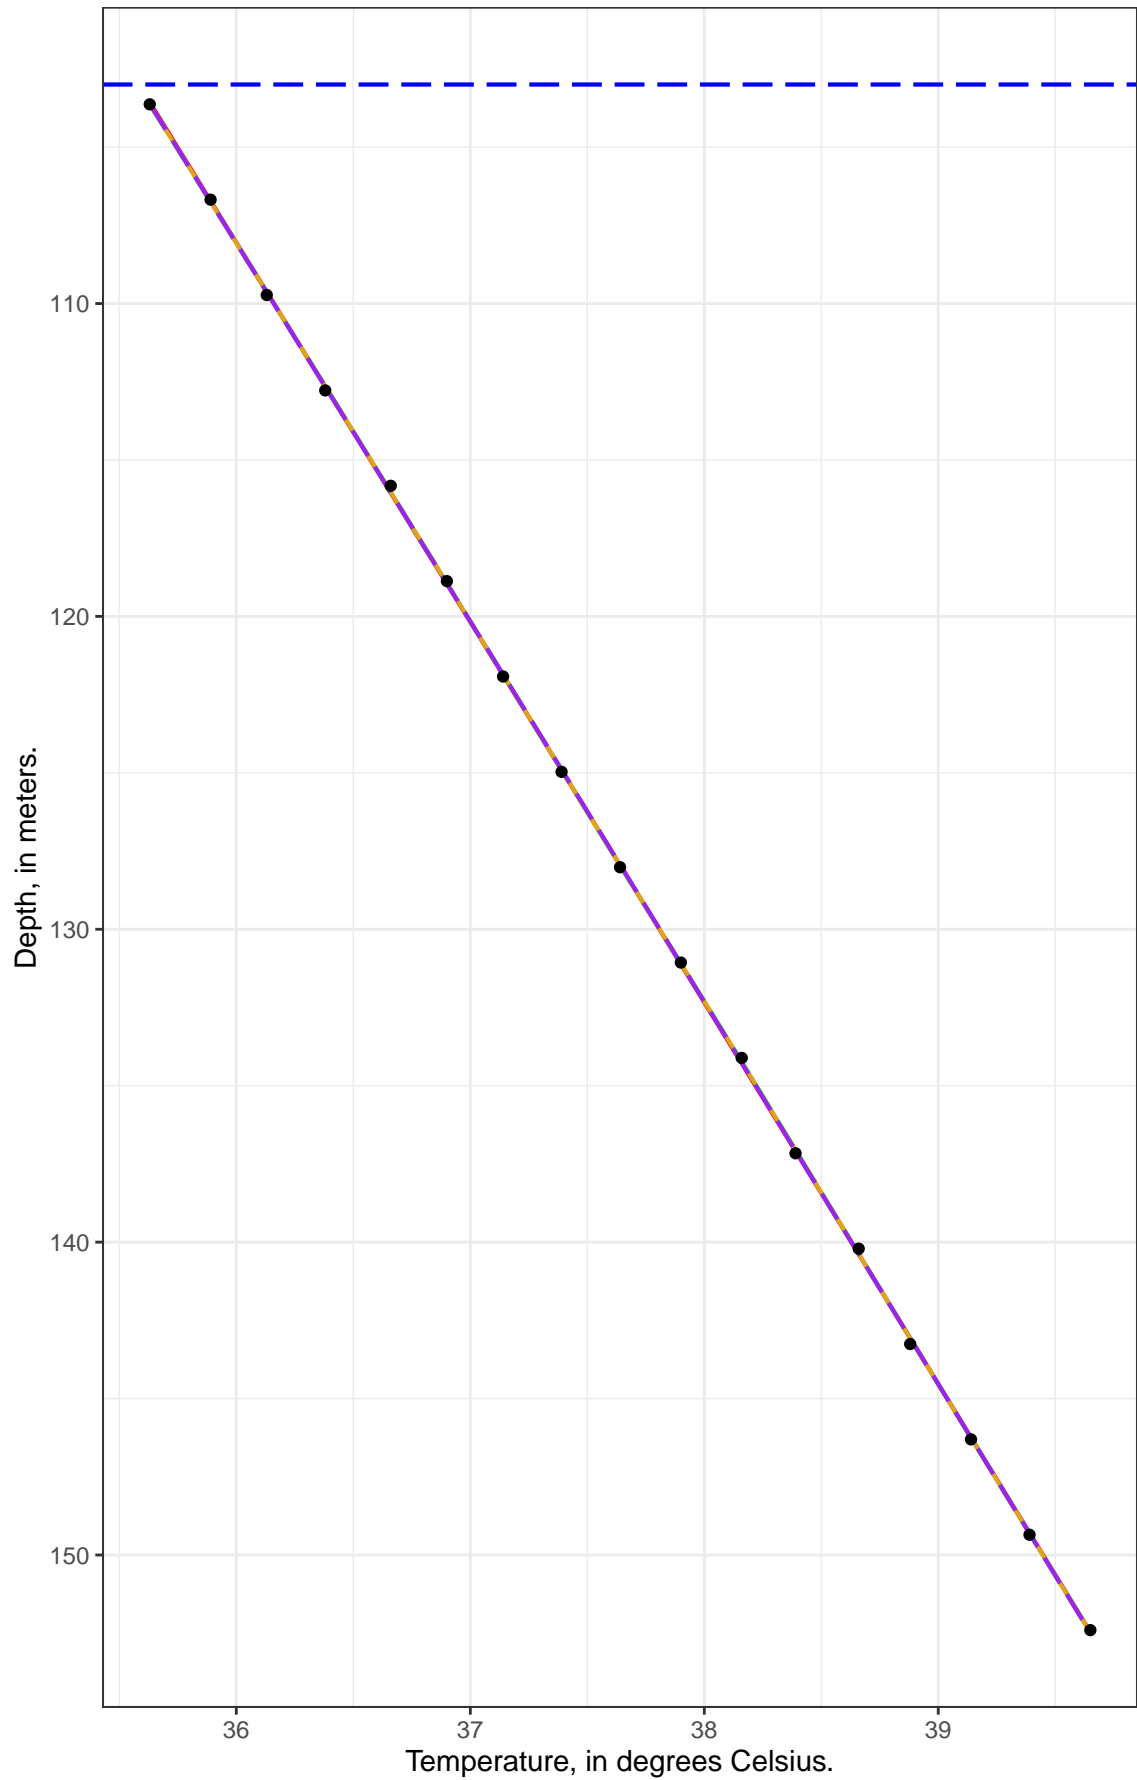

ID: 72 [H-2-80-1417\_KILBOURNE\_HOLE] First Derivative

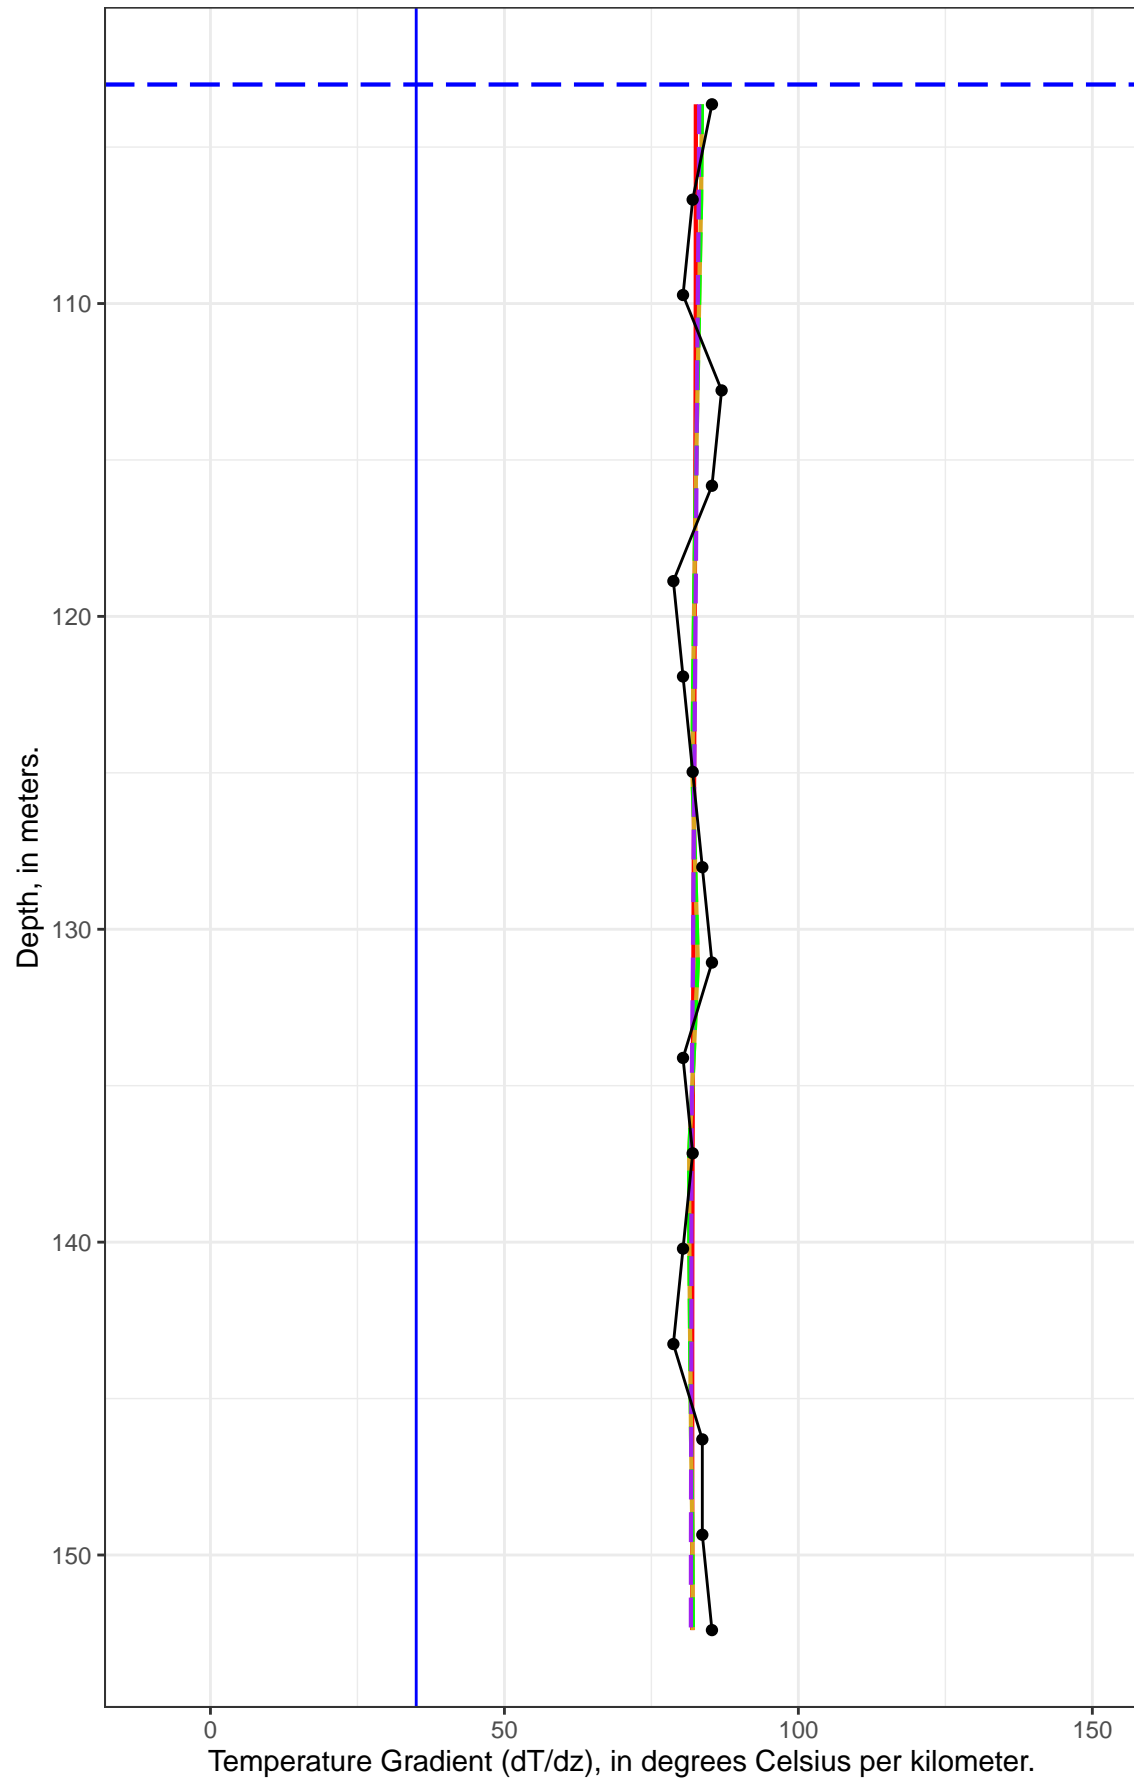

ID: 72 [H-2-80-1417\_KILBOURNE\_HOLE] Second Derivative

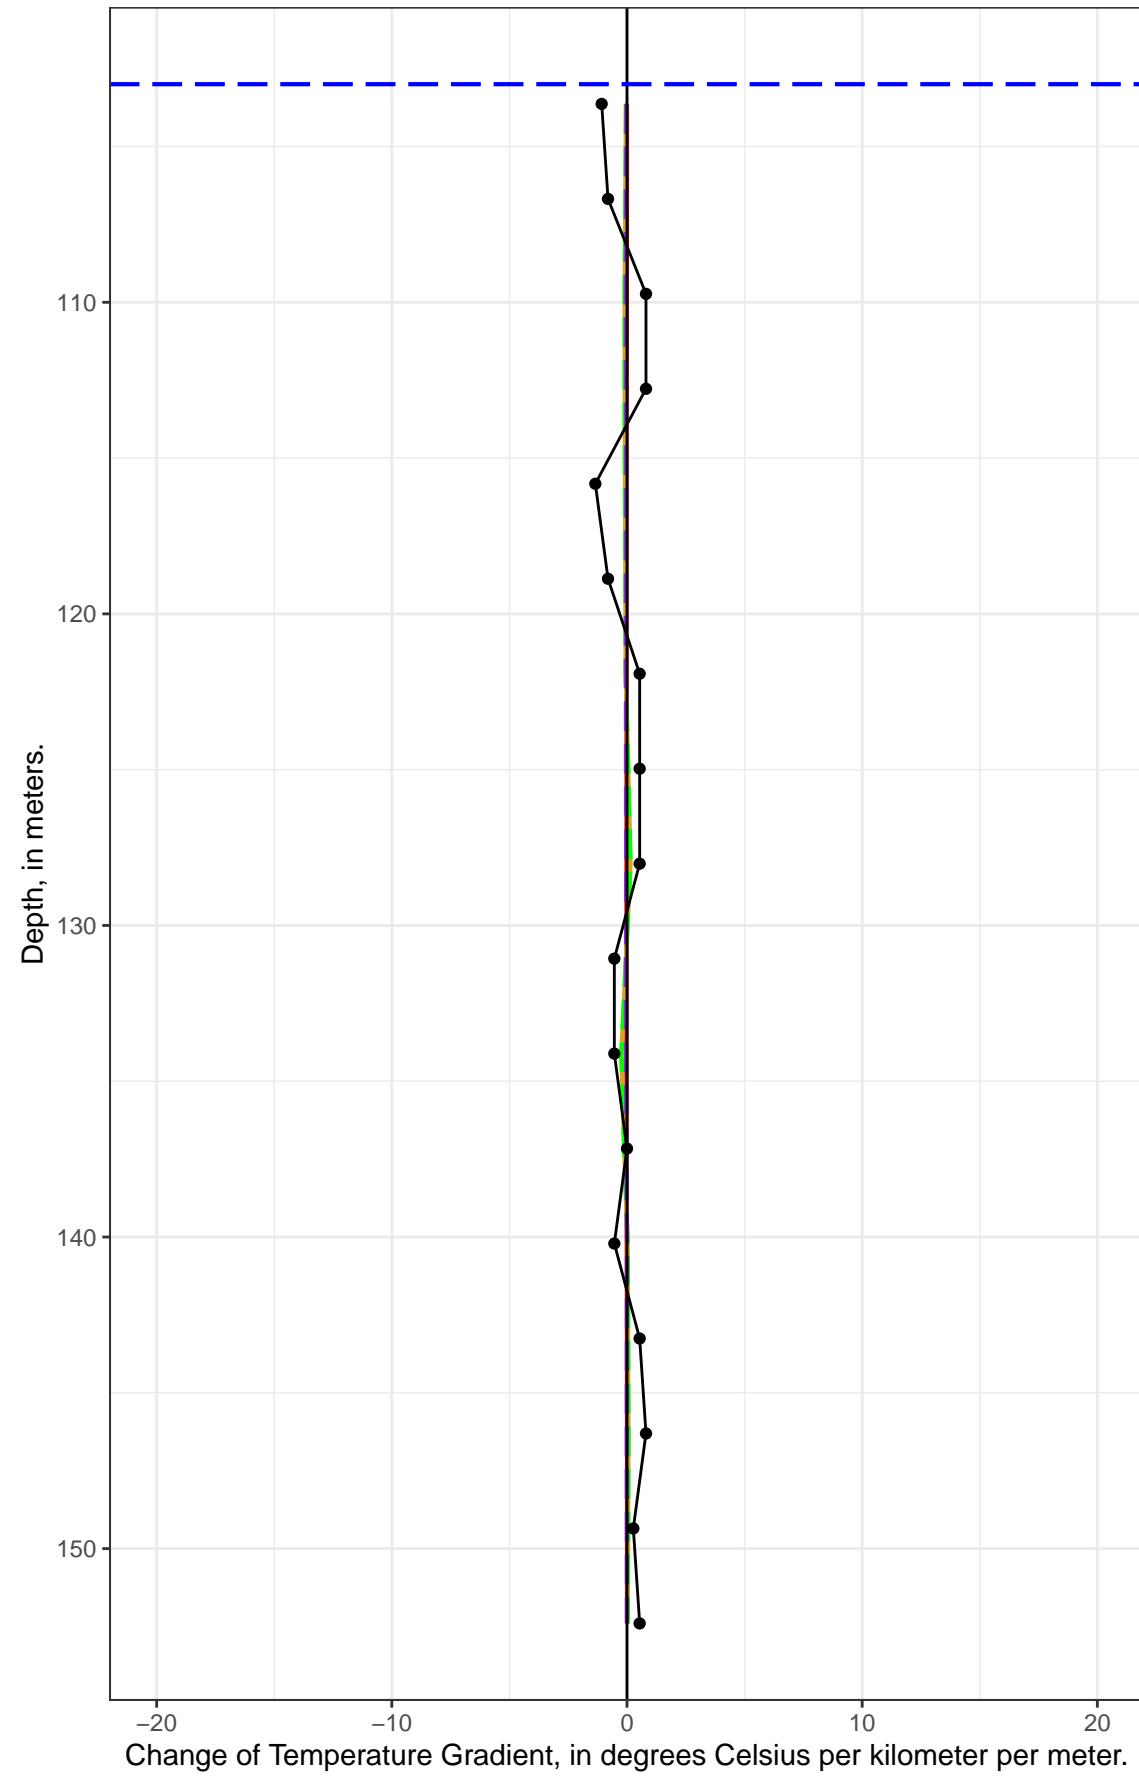

• Data • LOESS (AICC) • LOESS (constant) • LOESS (GCV) • Spline

• Data • LOESS (AICC) • LOESS (constant) • LOESS (GCV) • Spline

• Data • LOESS (AICC) • LOESS (constant) • LOESS (GCV) • Spline

ID: 73 [H-2-80-1451\_KILBOURNE\_HOLE] Smoothed Profile

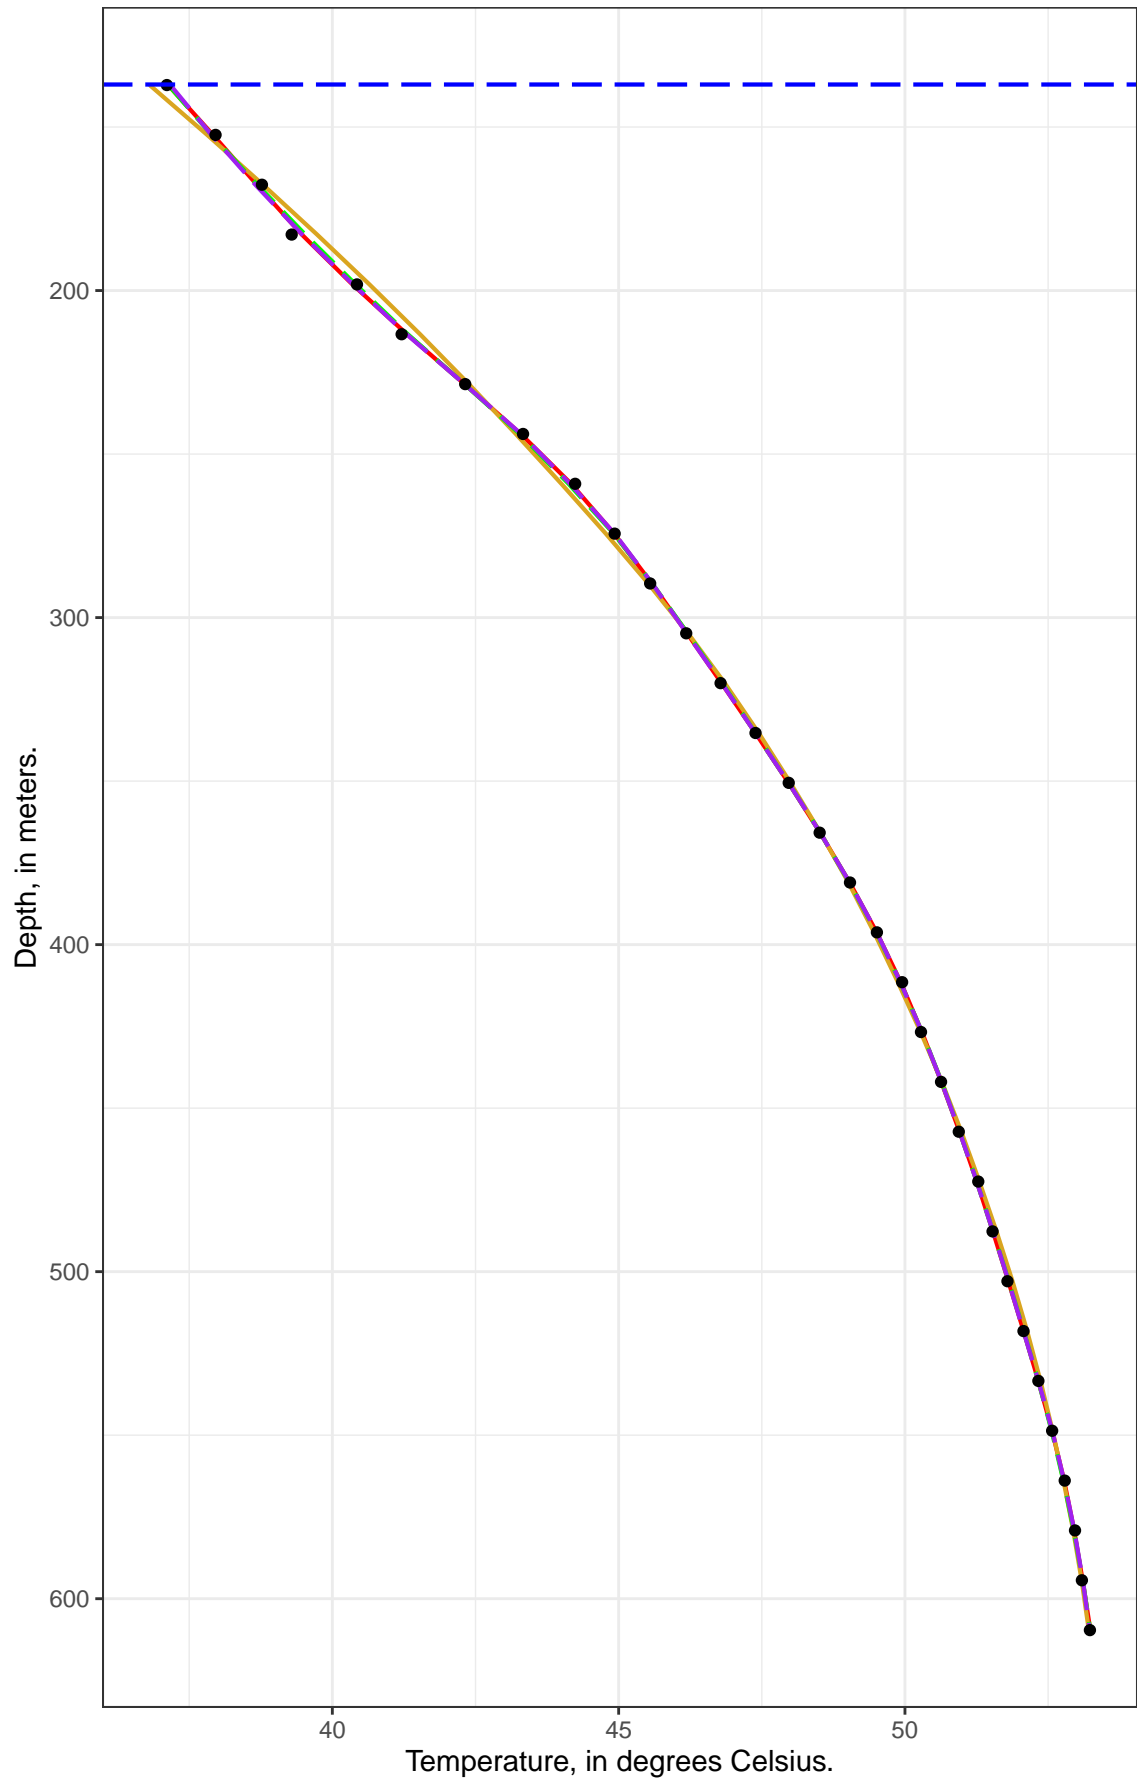

ID: 73 [H-2-80-1451\_KILBOURNE\_HOLE] First Derivative

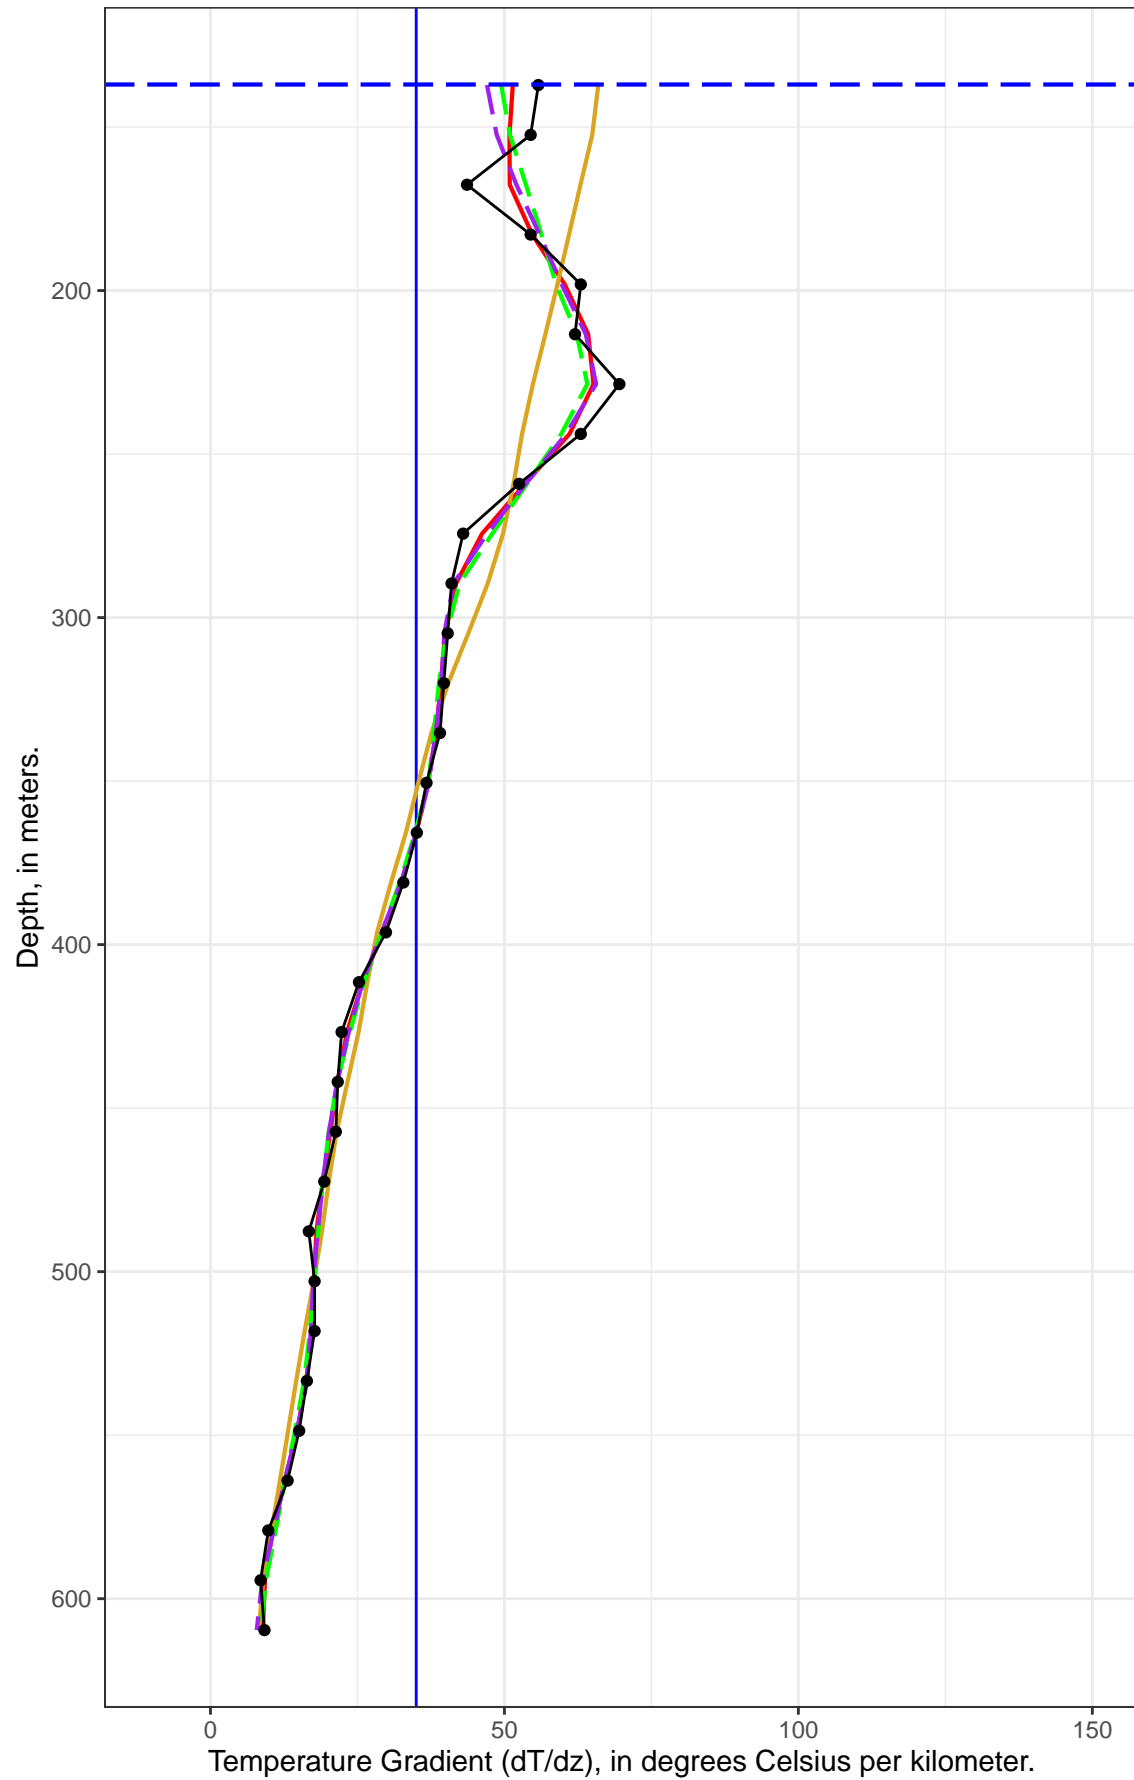

ID: 73 [H-2-80-1451\_KILBOURNE\_HOLE] Second Derivative

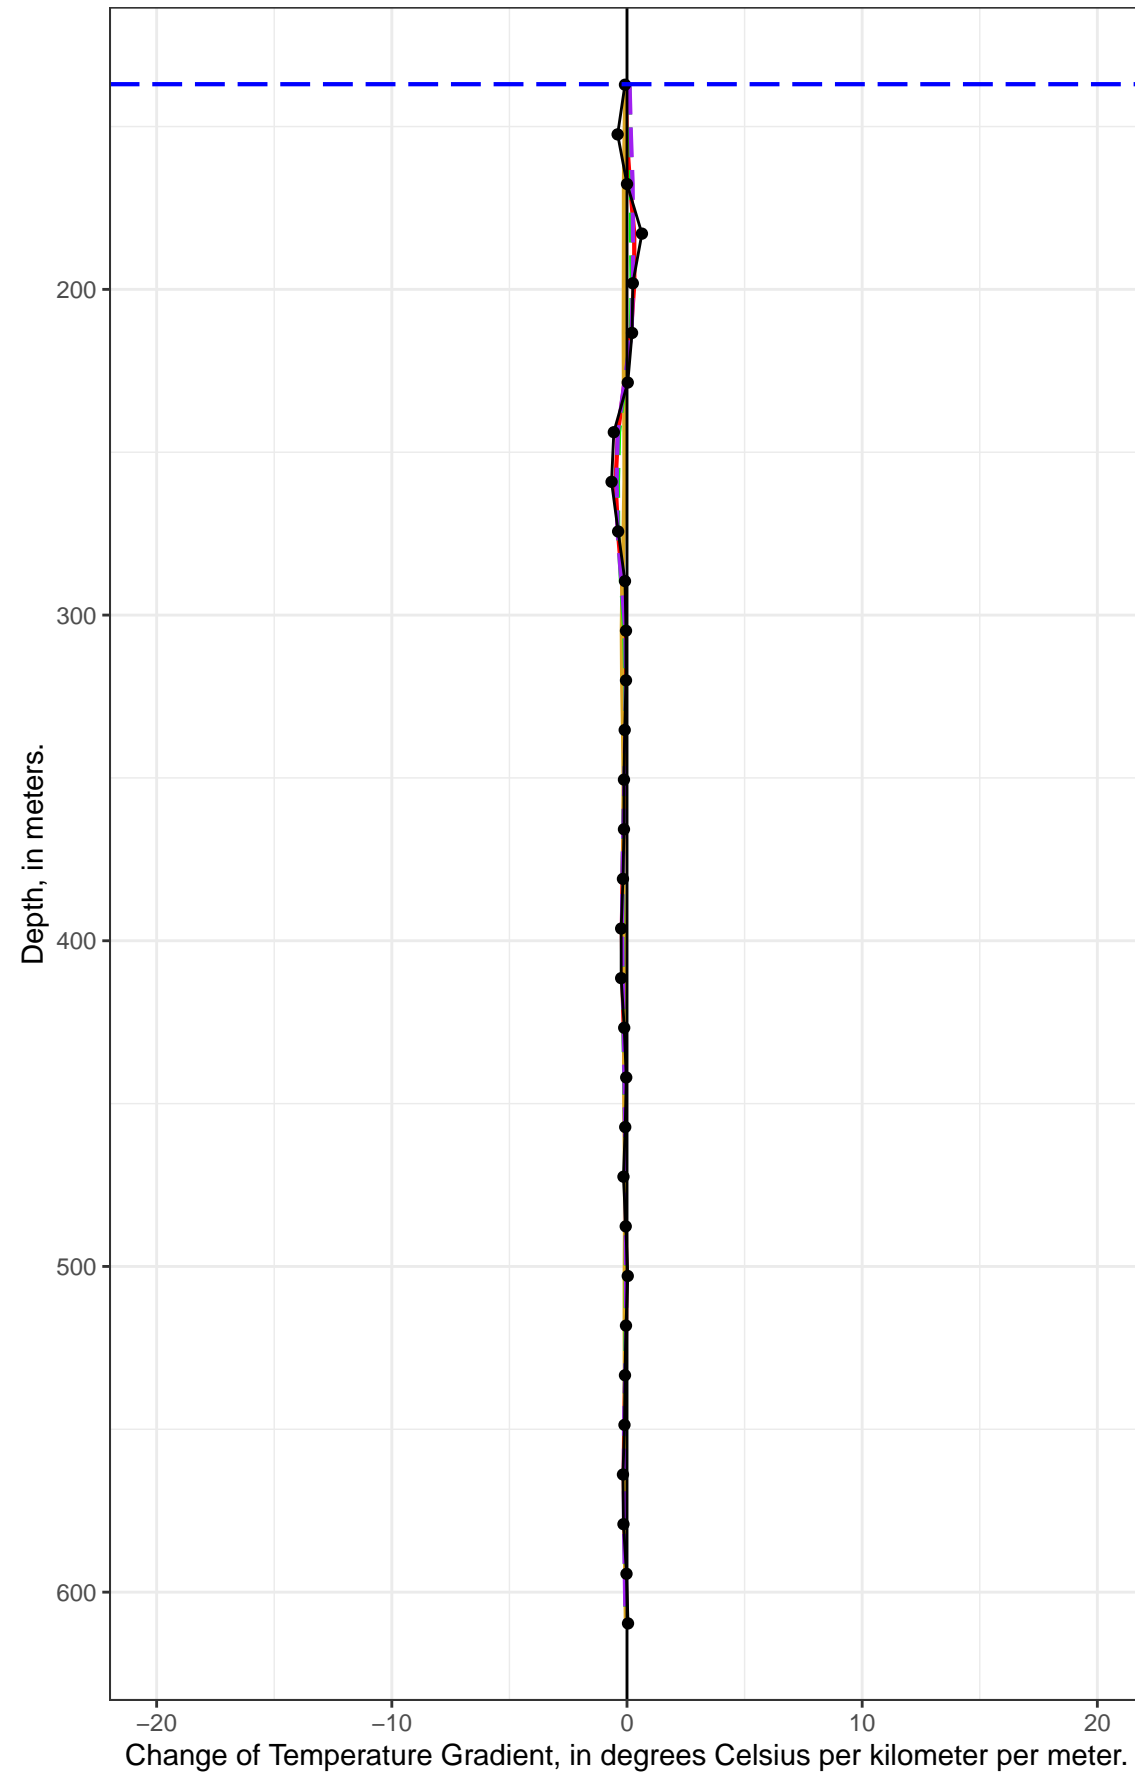

• Data • LOESS (AICC) • LOESS (constant) • LOESS (GCV) • Spline

• Data • LOESS (AICC) • LOESS (constant) • LOESS (GCV) • Spline

• Data • LOESS (AICC) • LOESS (constant) • LOESS (GCV) • Spline

ID: 74 [H-2-80-1452\_KILBOURNE\_HOLE] Smoothed Profile

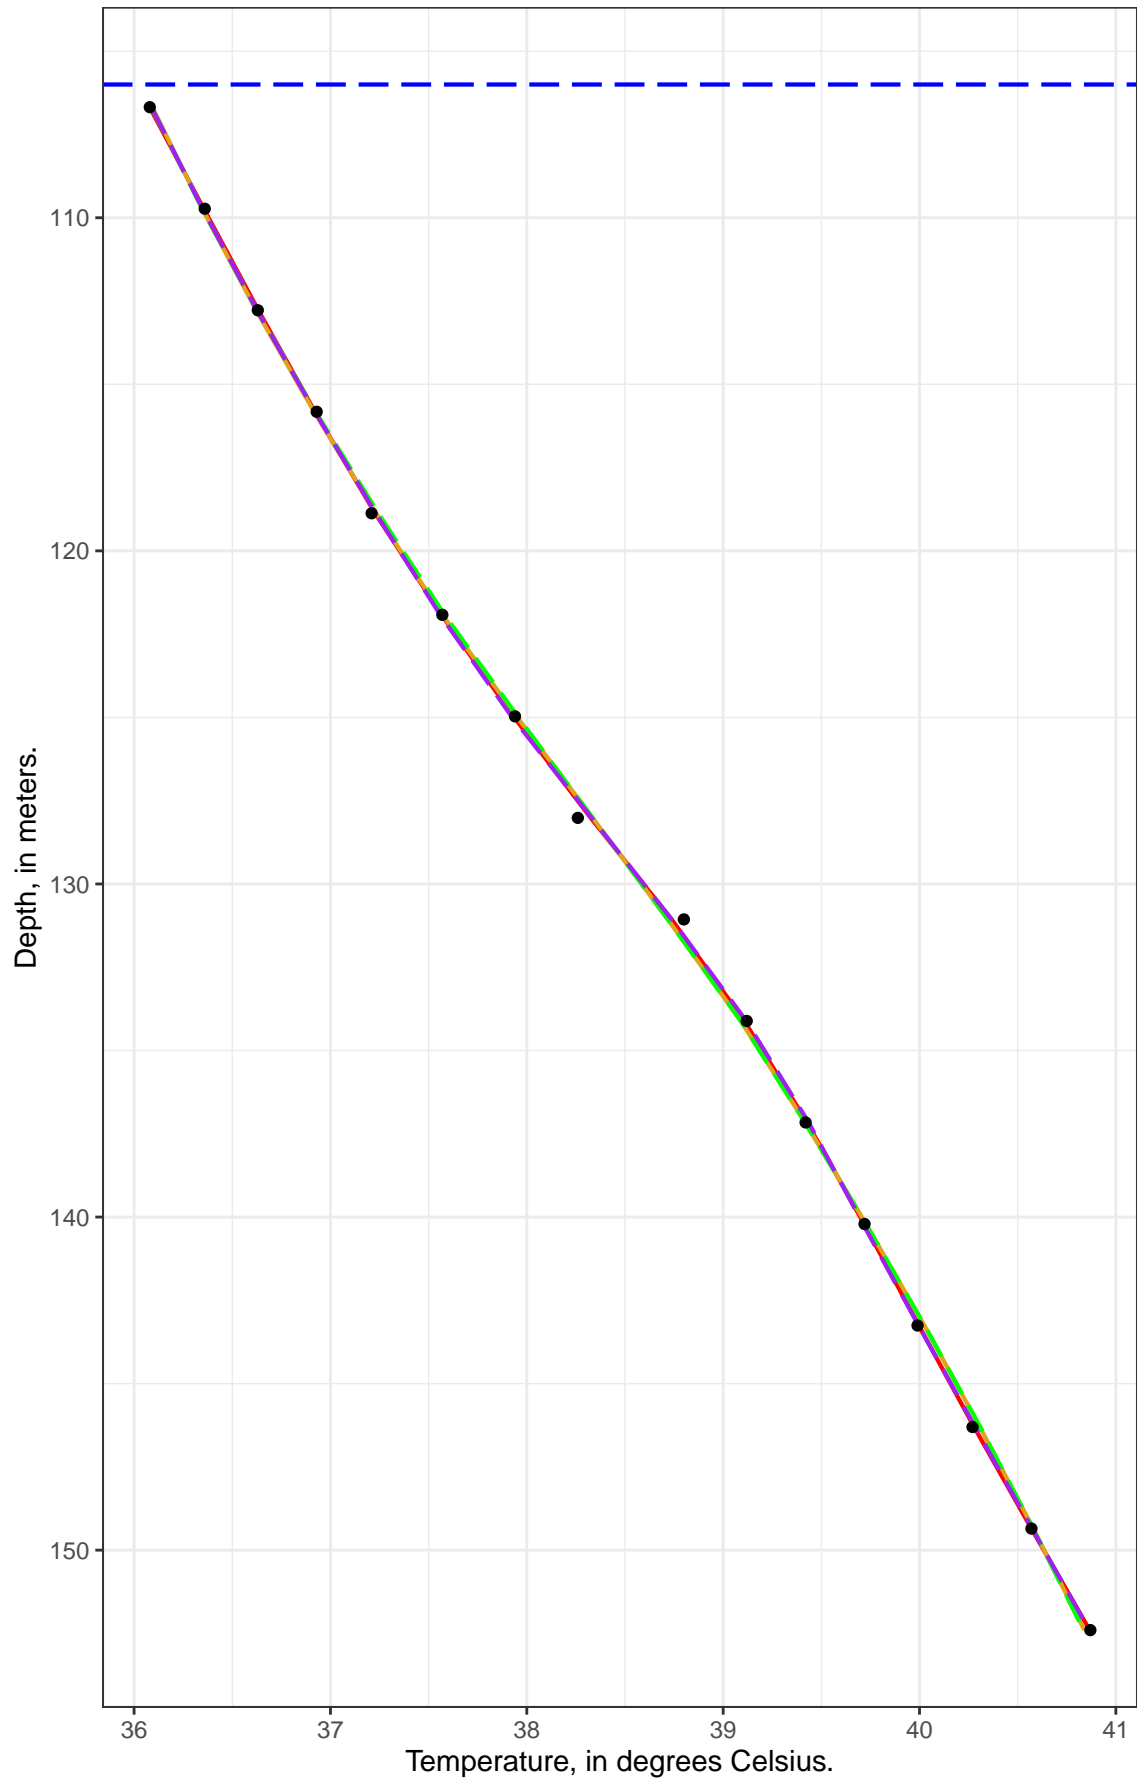

ID: 74 [H-2-80-1452\_KILBOURNE\_HOLE] First Derivative

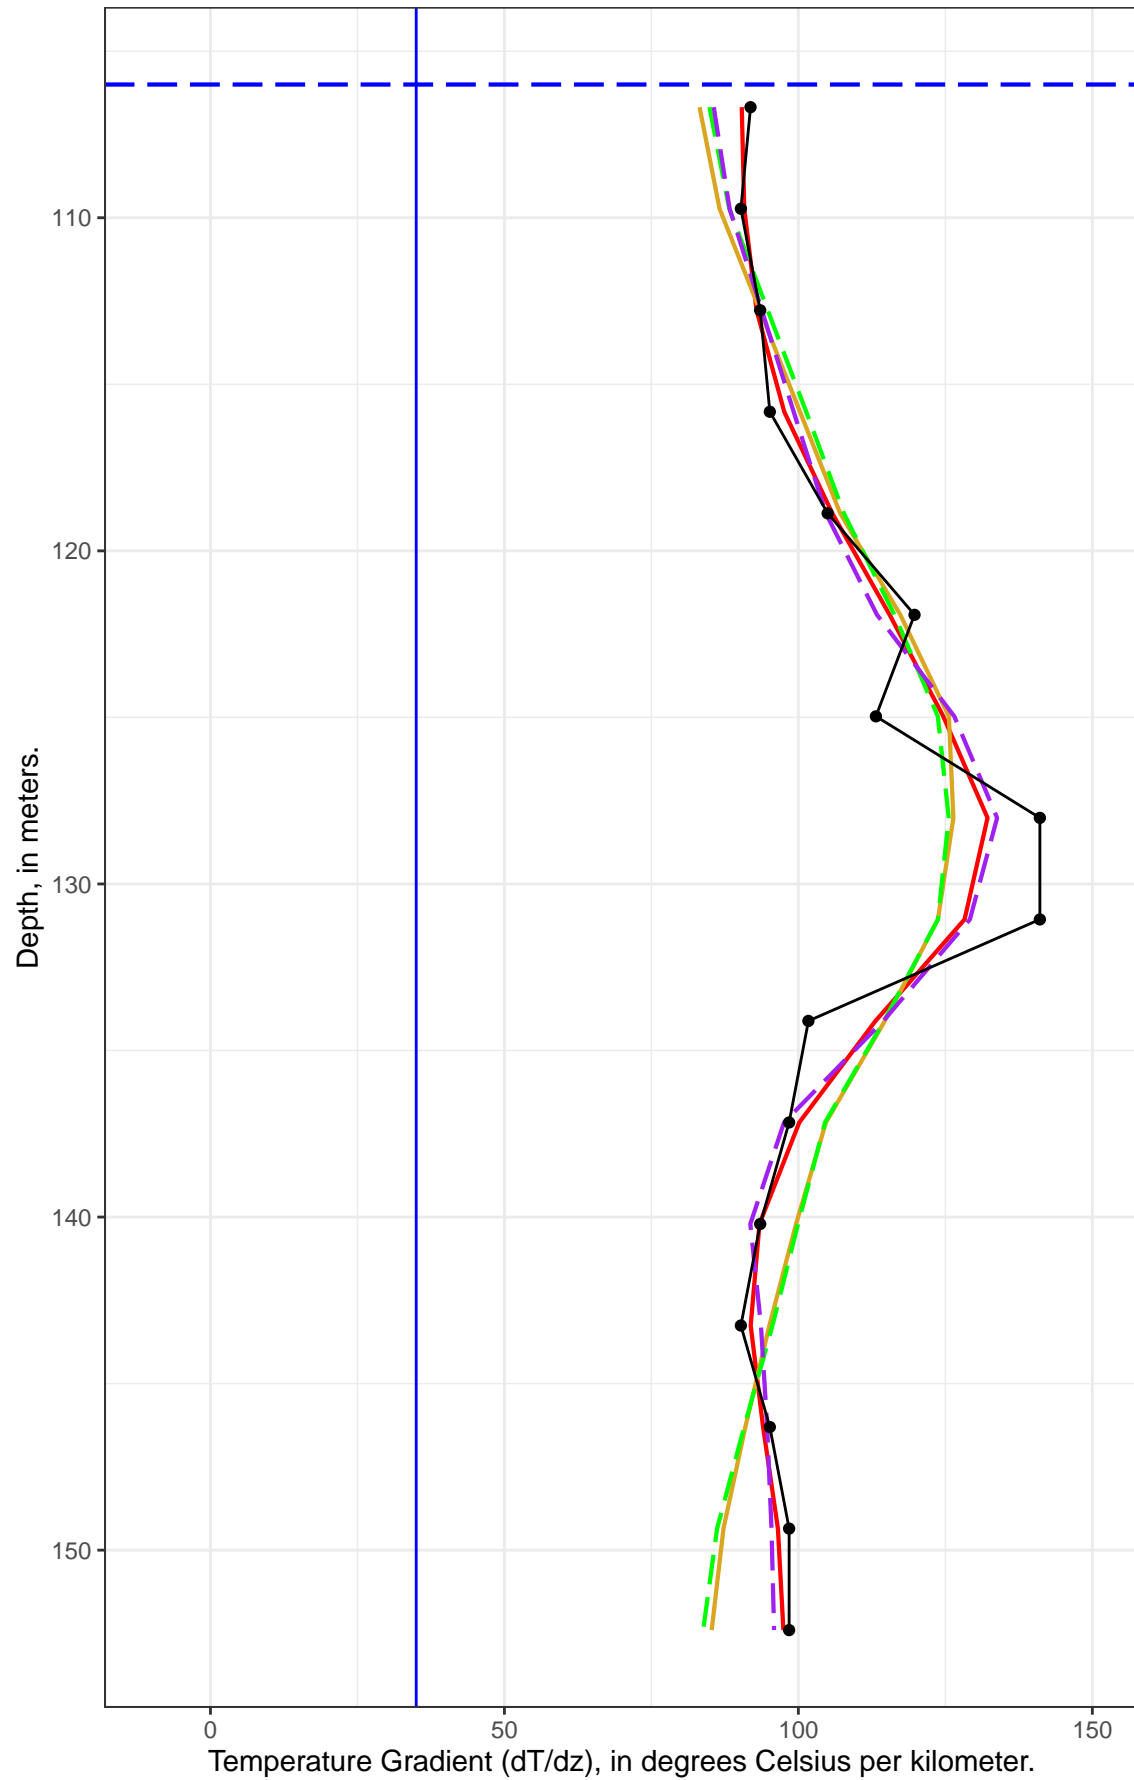

ID: 74 [H-2-80-1452\_KILBOURNE\_HOLE] Second Derivative

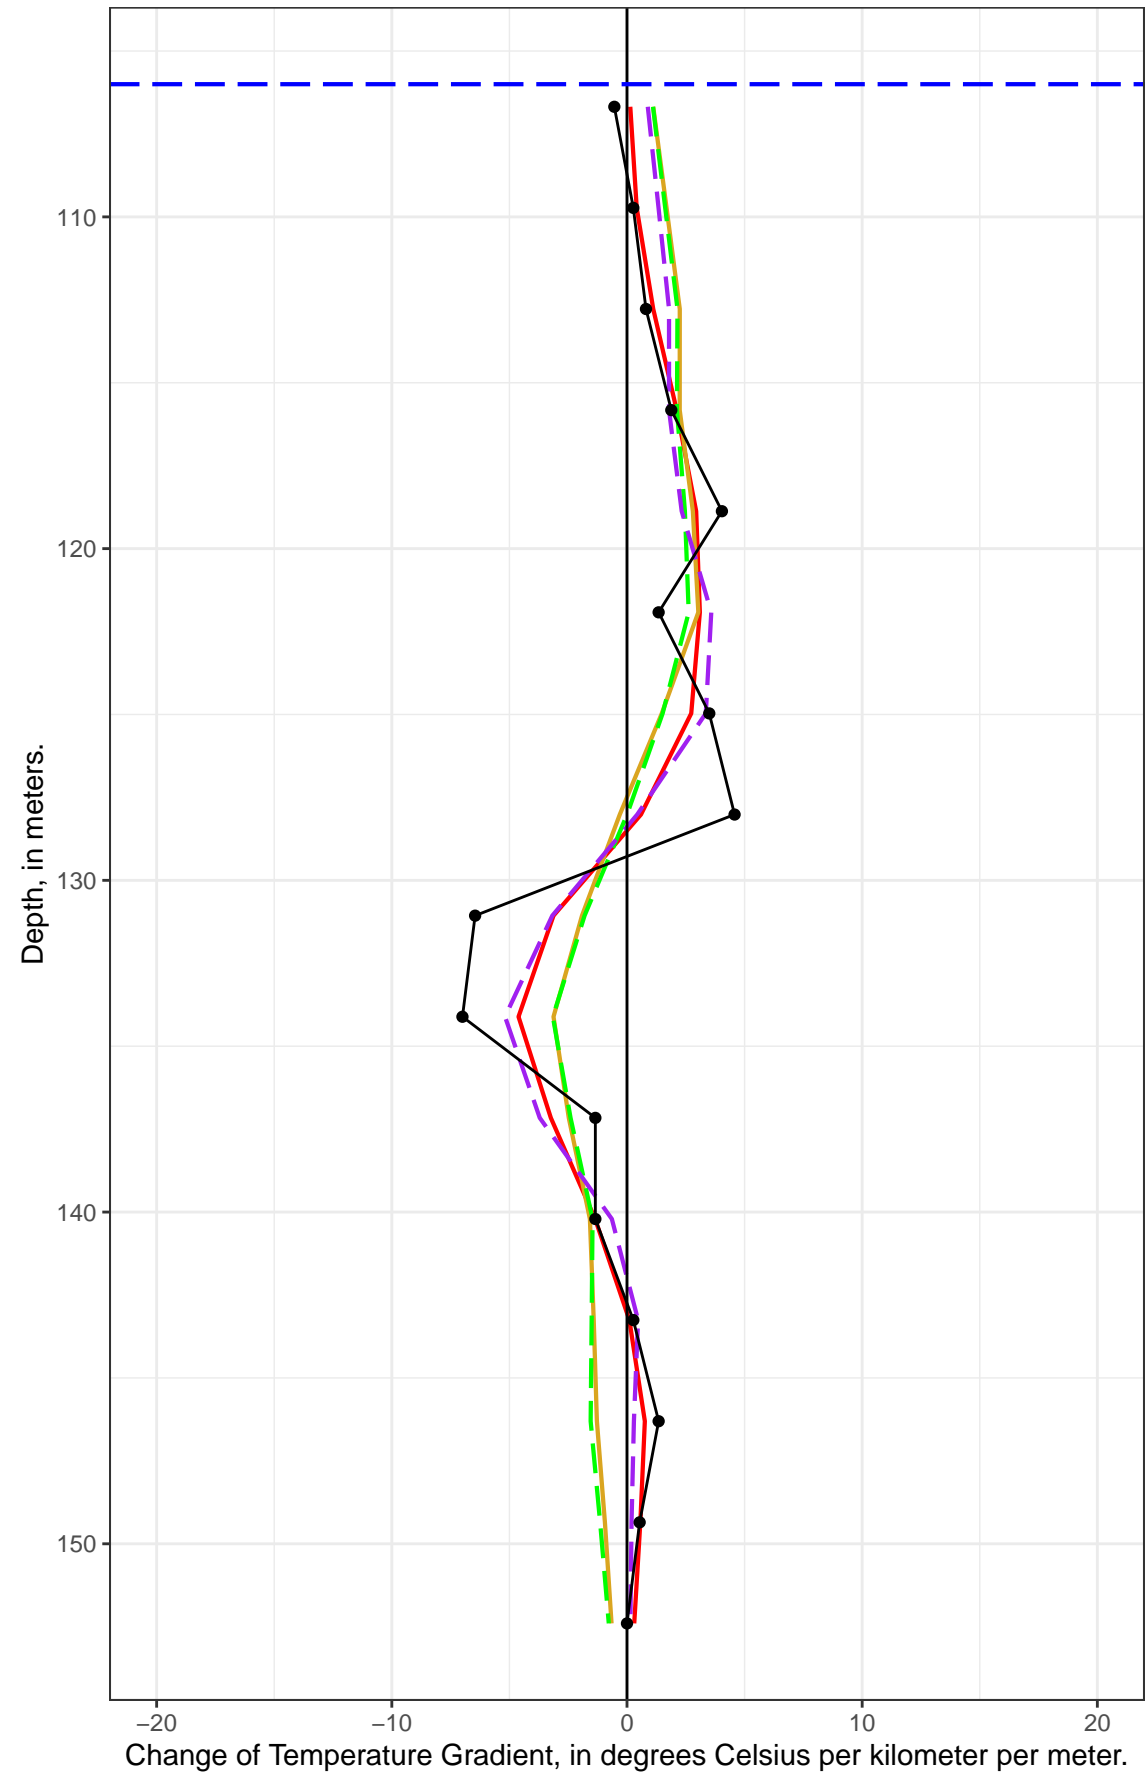

• Data — LOESS (AICC) — LOESS (constant) — LOESS (GCV) — Spline

• Data — LOESS (AICC) — LOESS (constant) — LOESS (GCV) — Spline

• Data — LOESS (AICC) — LOESS (constant) — LOESS (GCV) — Spline



ID: 75 [H-2-80-1453\_KILBOURNE\_HOLE] Smoothed Profile

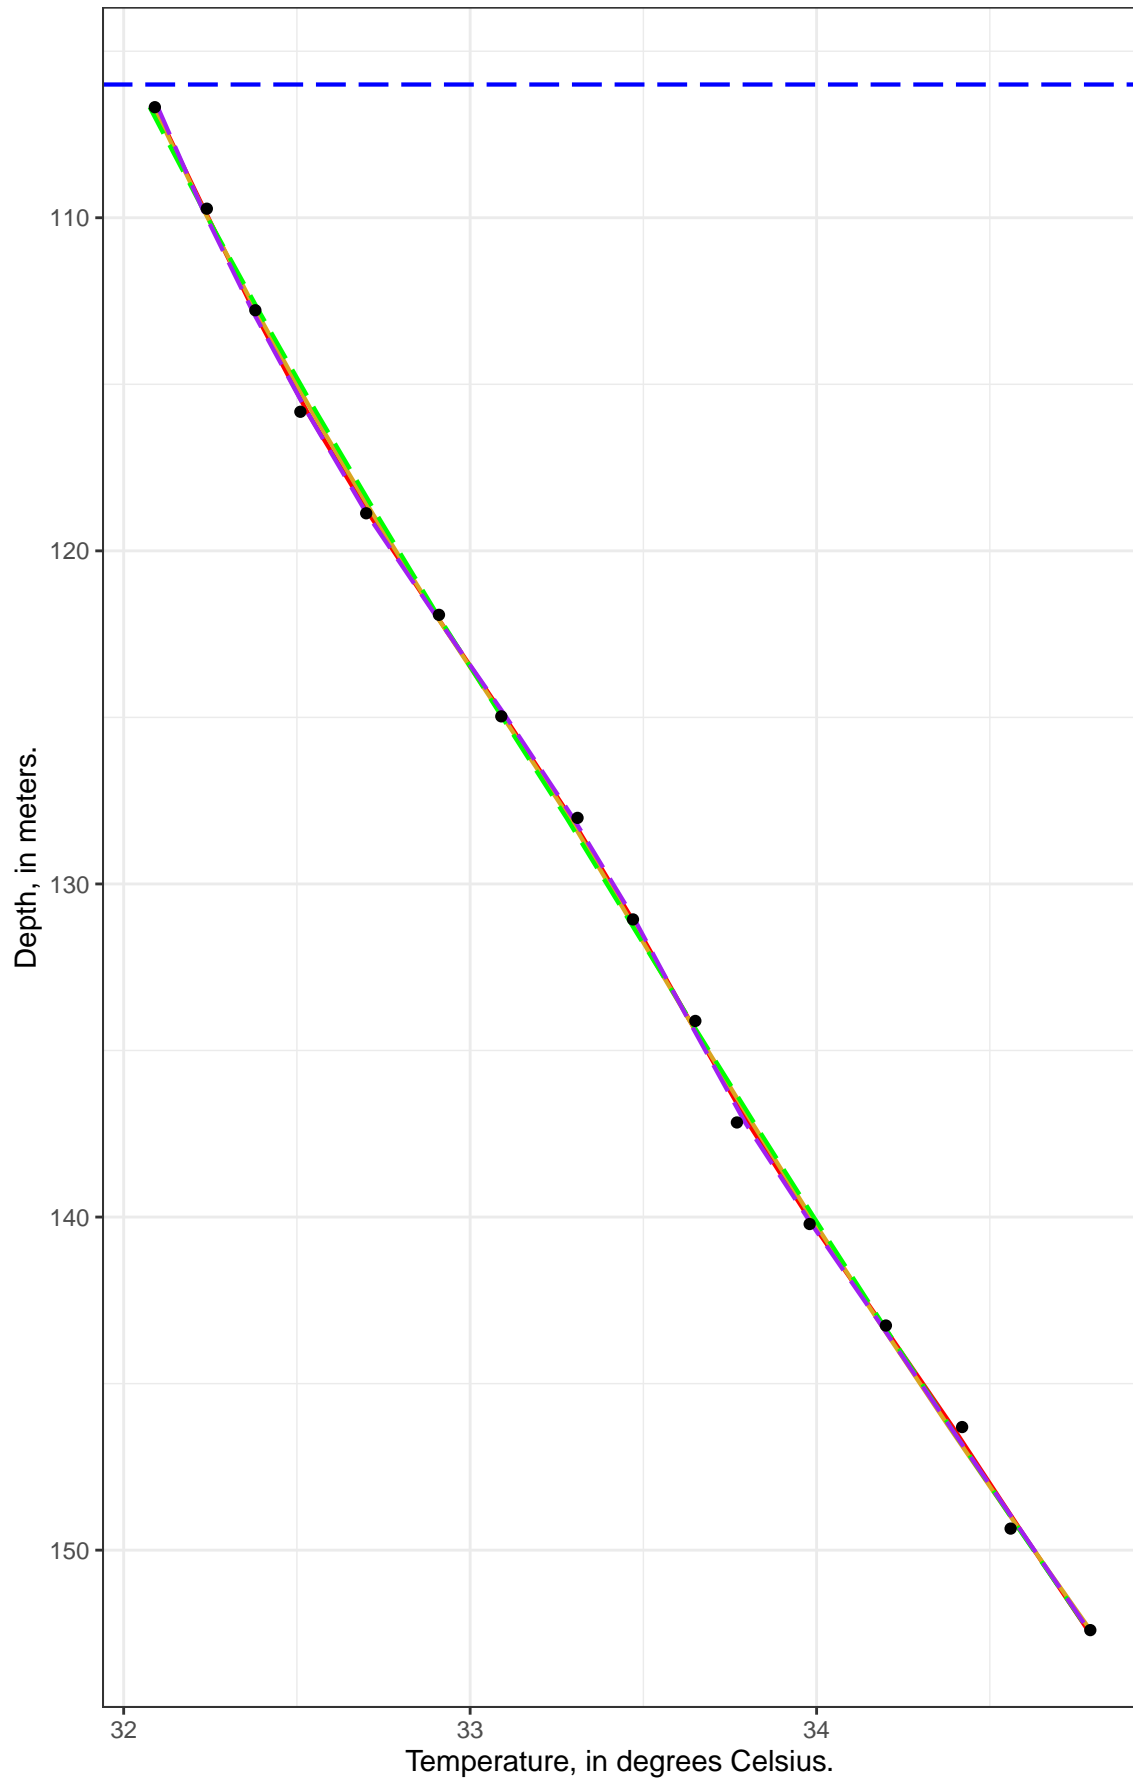

ID: 75 [H-2-80-1453\_KILBOURNE\_HOLE] First Derivative

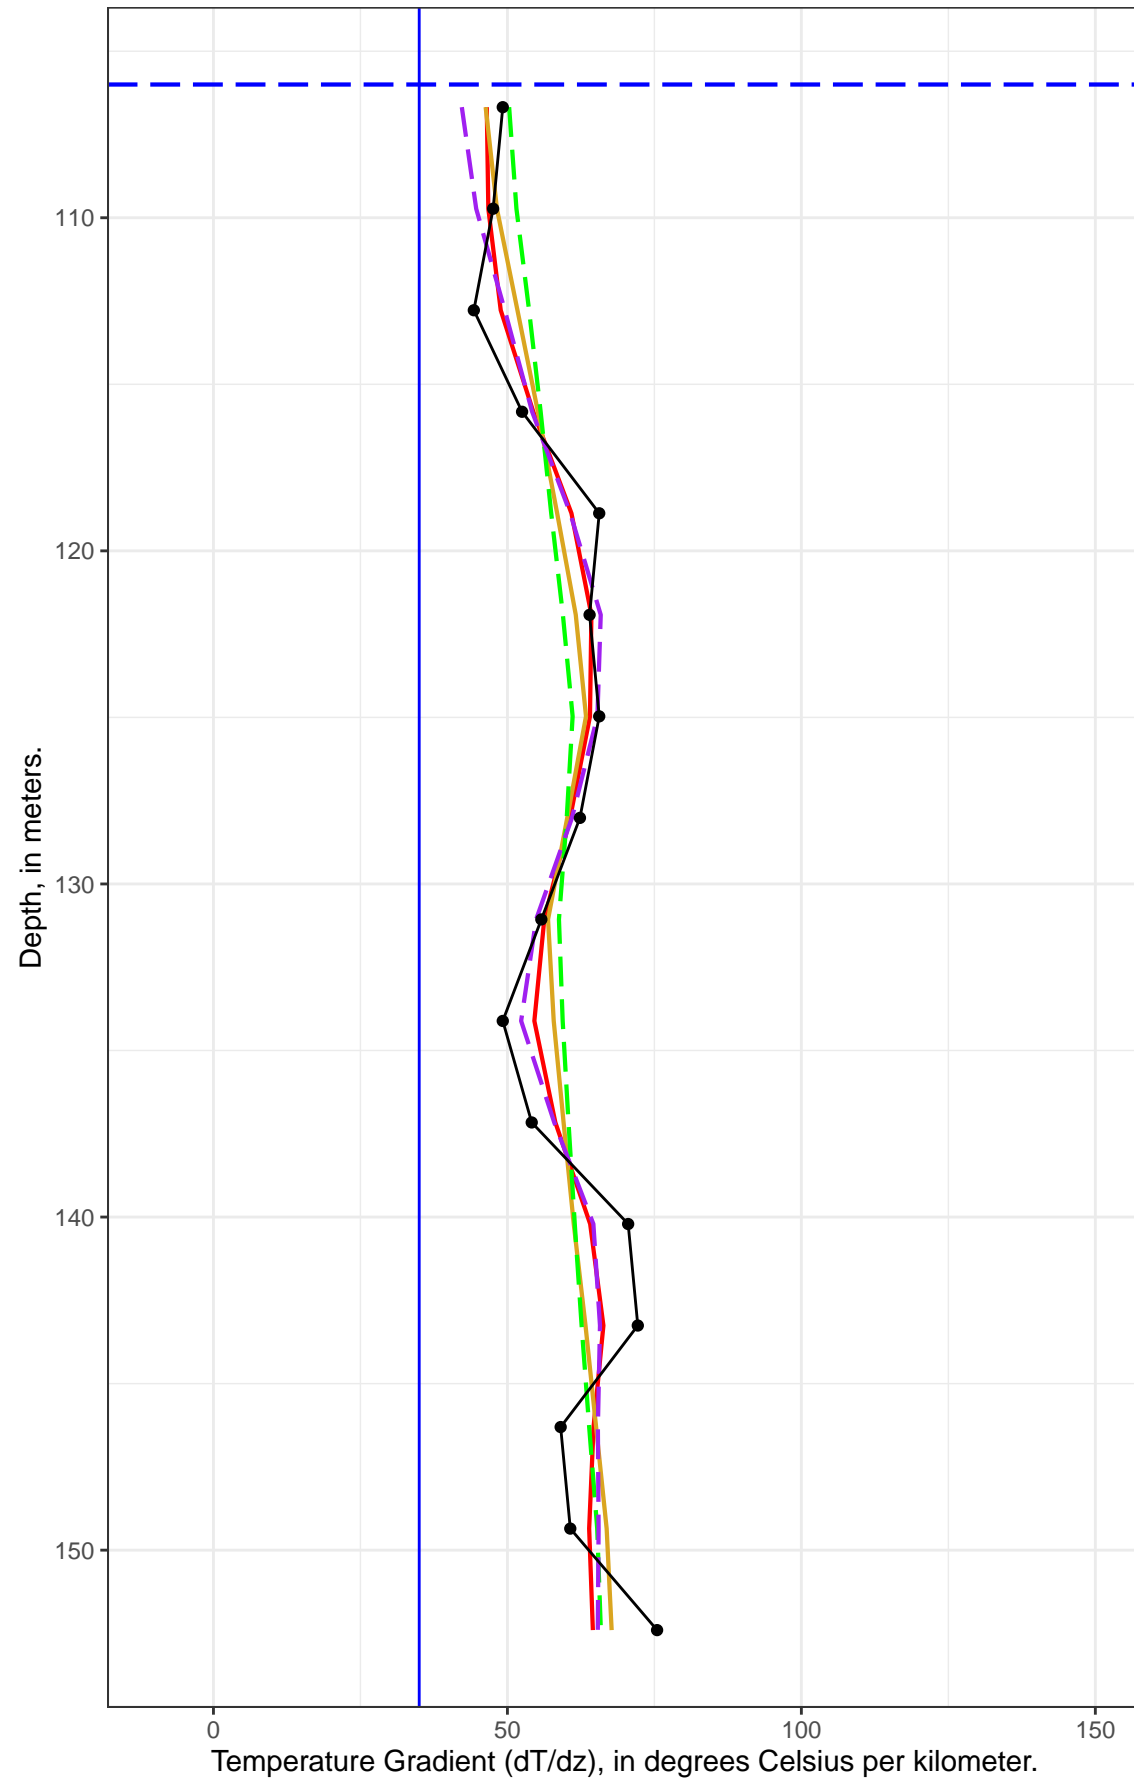

ID: 75 [H-2-80-1453\_KILBOURNE\_HOLE] Second Derivative

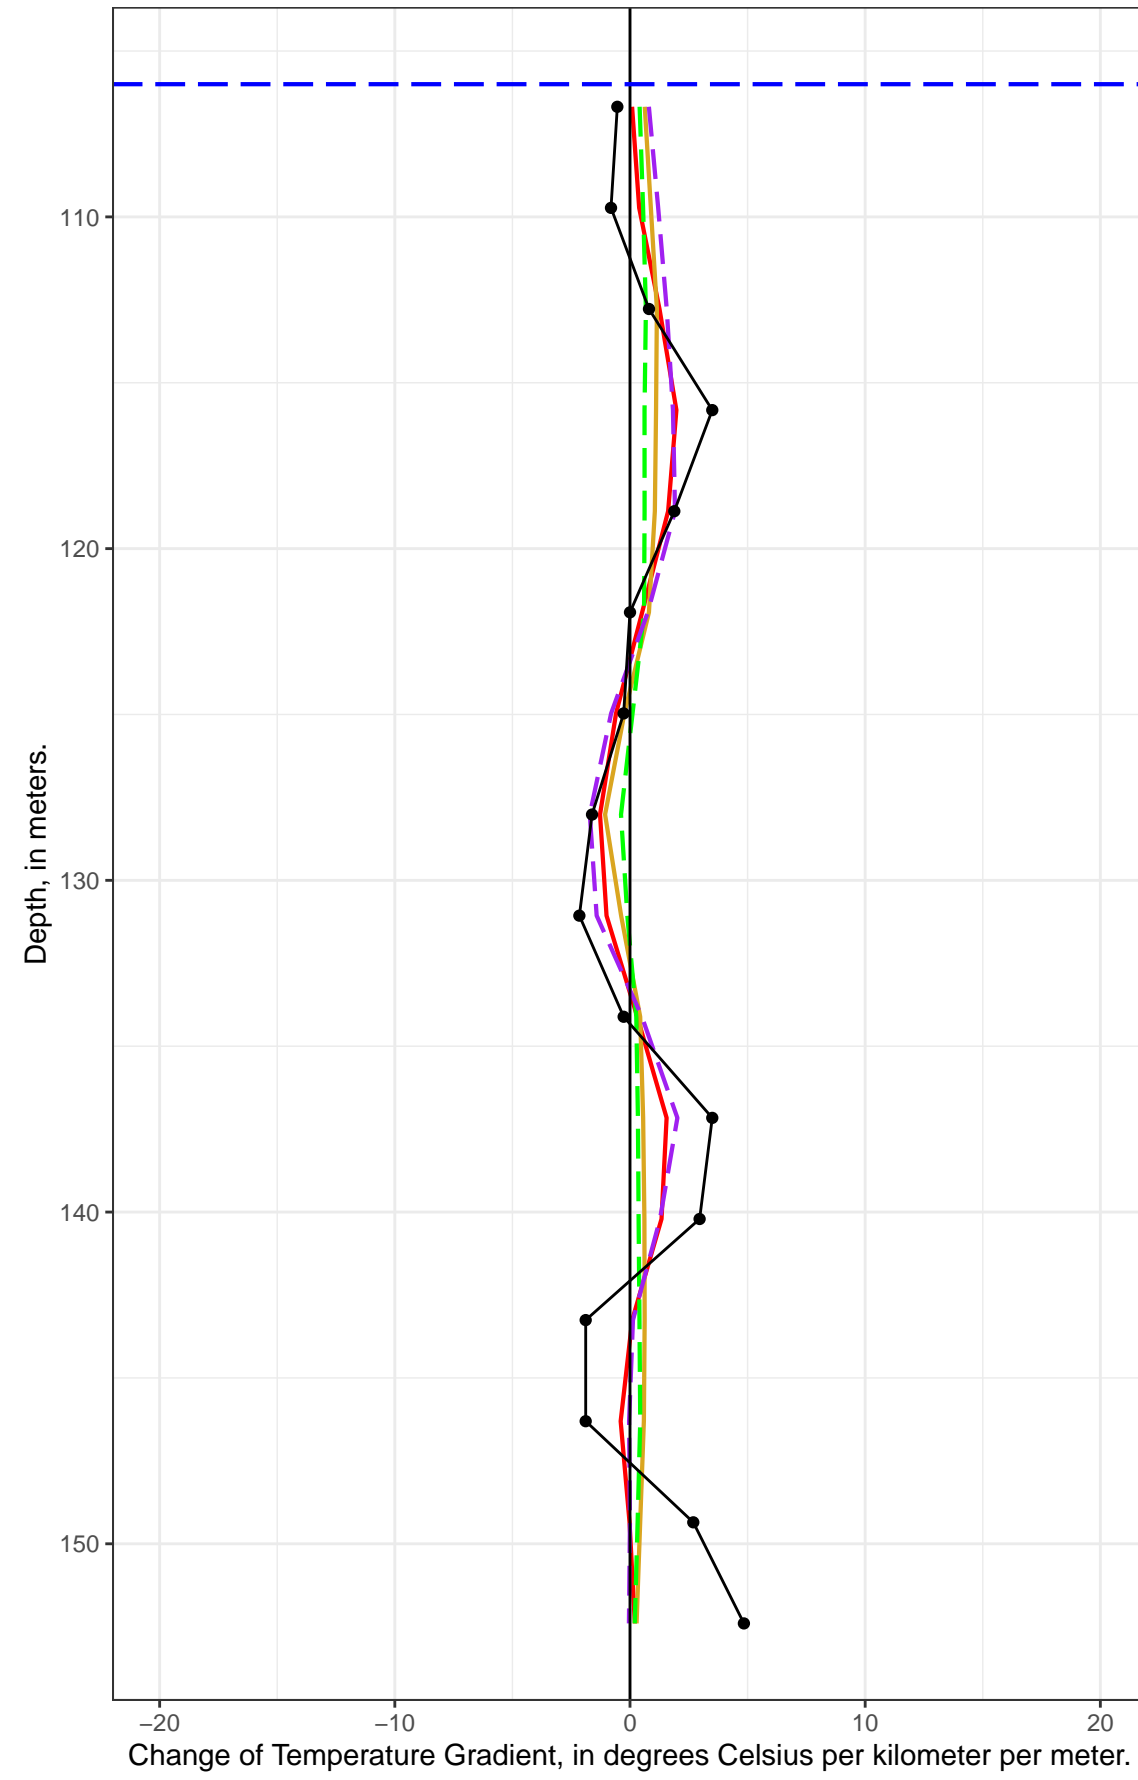

• Data — LOESS (AICC) — LOESS (constant) — LOESS (GCV) — Spline

• Data — LOESS (AICC) — LOESS (constant) — LOESS (GCV) — Spline

• Data — LOESS (AICC) — LOESS (constant) — LOESS (GCV) — Spline

ID: 76 [H-2-80-1454\_KILBOURNE\_HOLE] Smoothed Profile

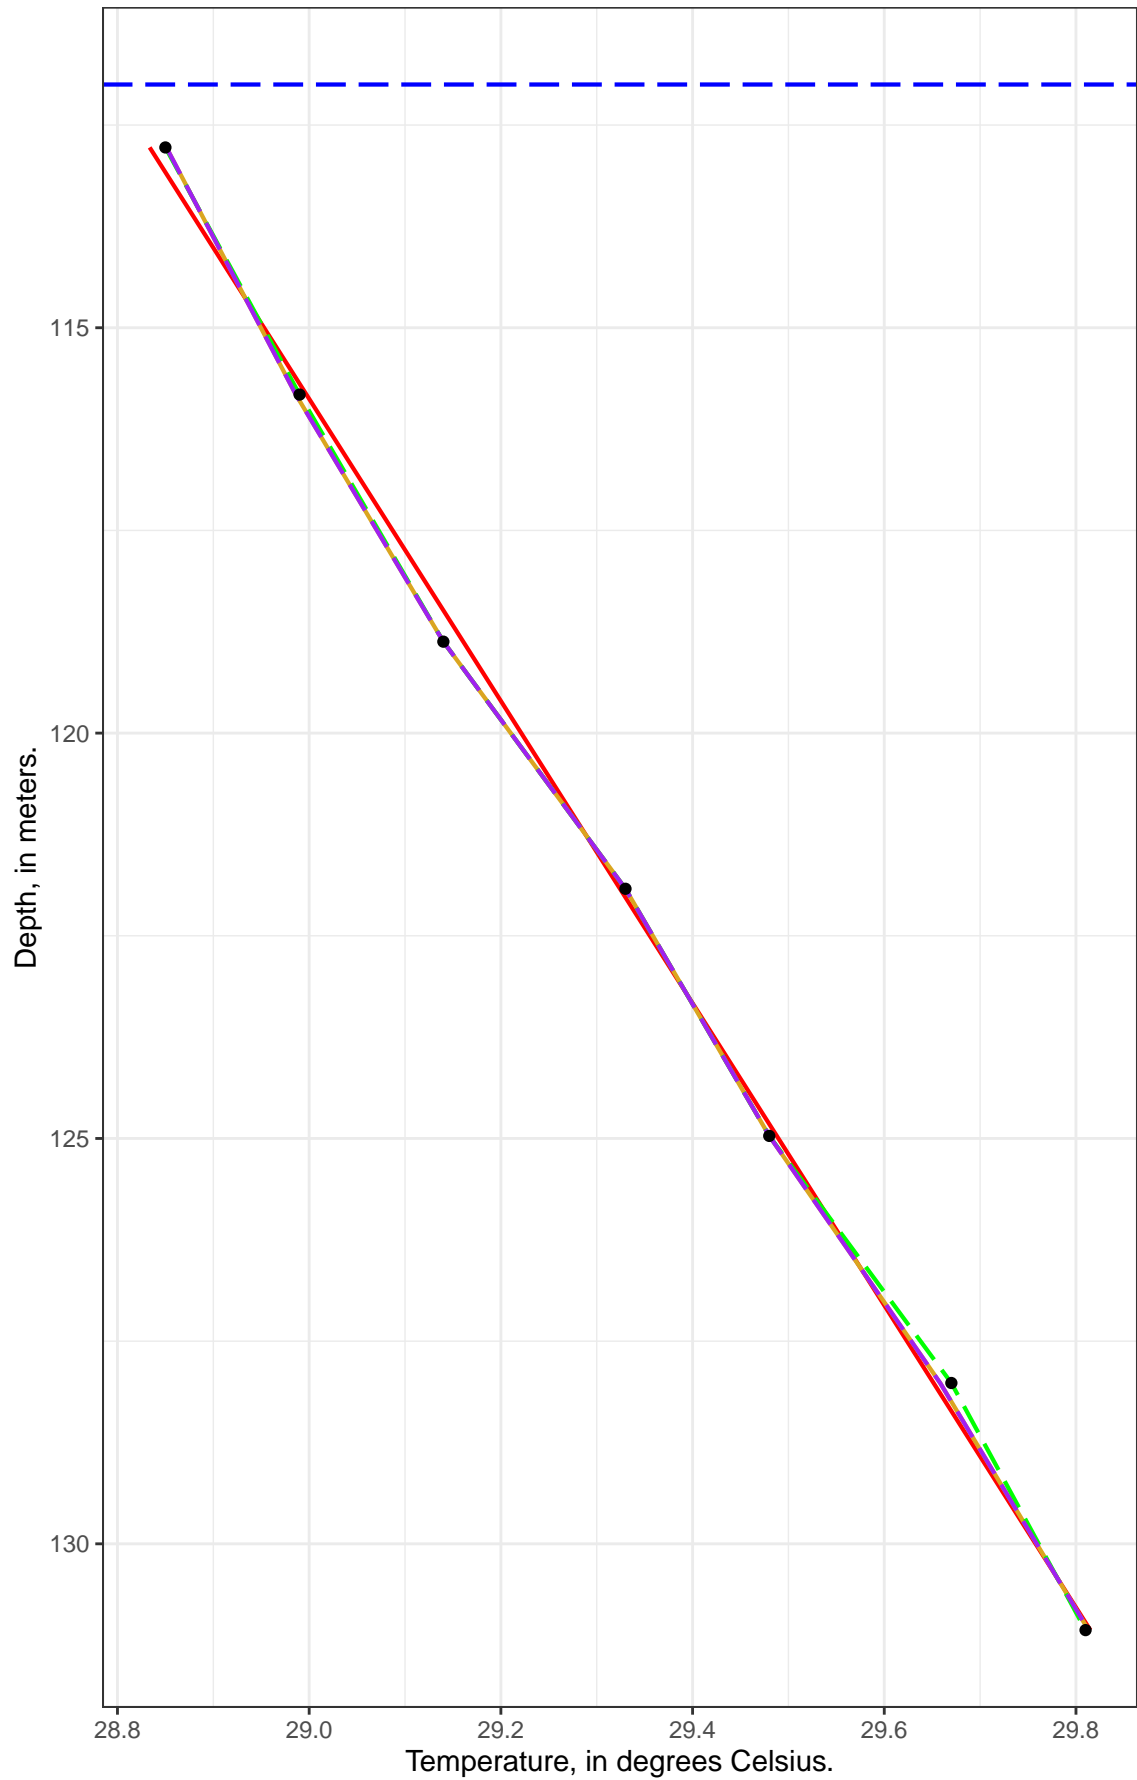

ID: 76 [H-2-80-1454\_KILBOURNE\_HOLE] First Derivative

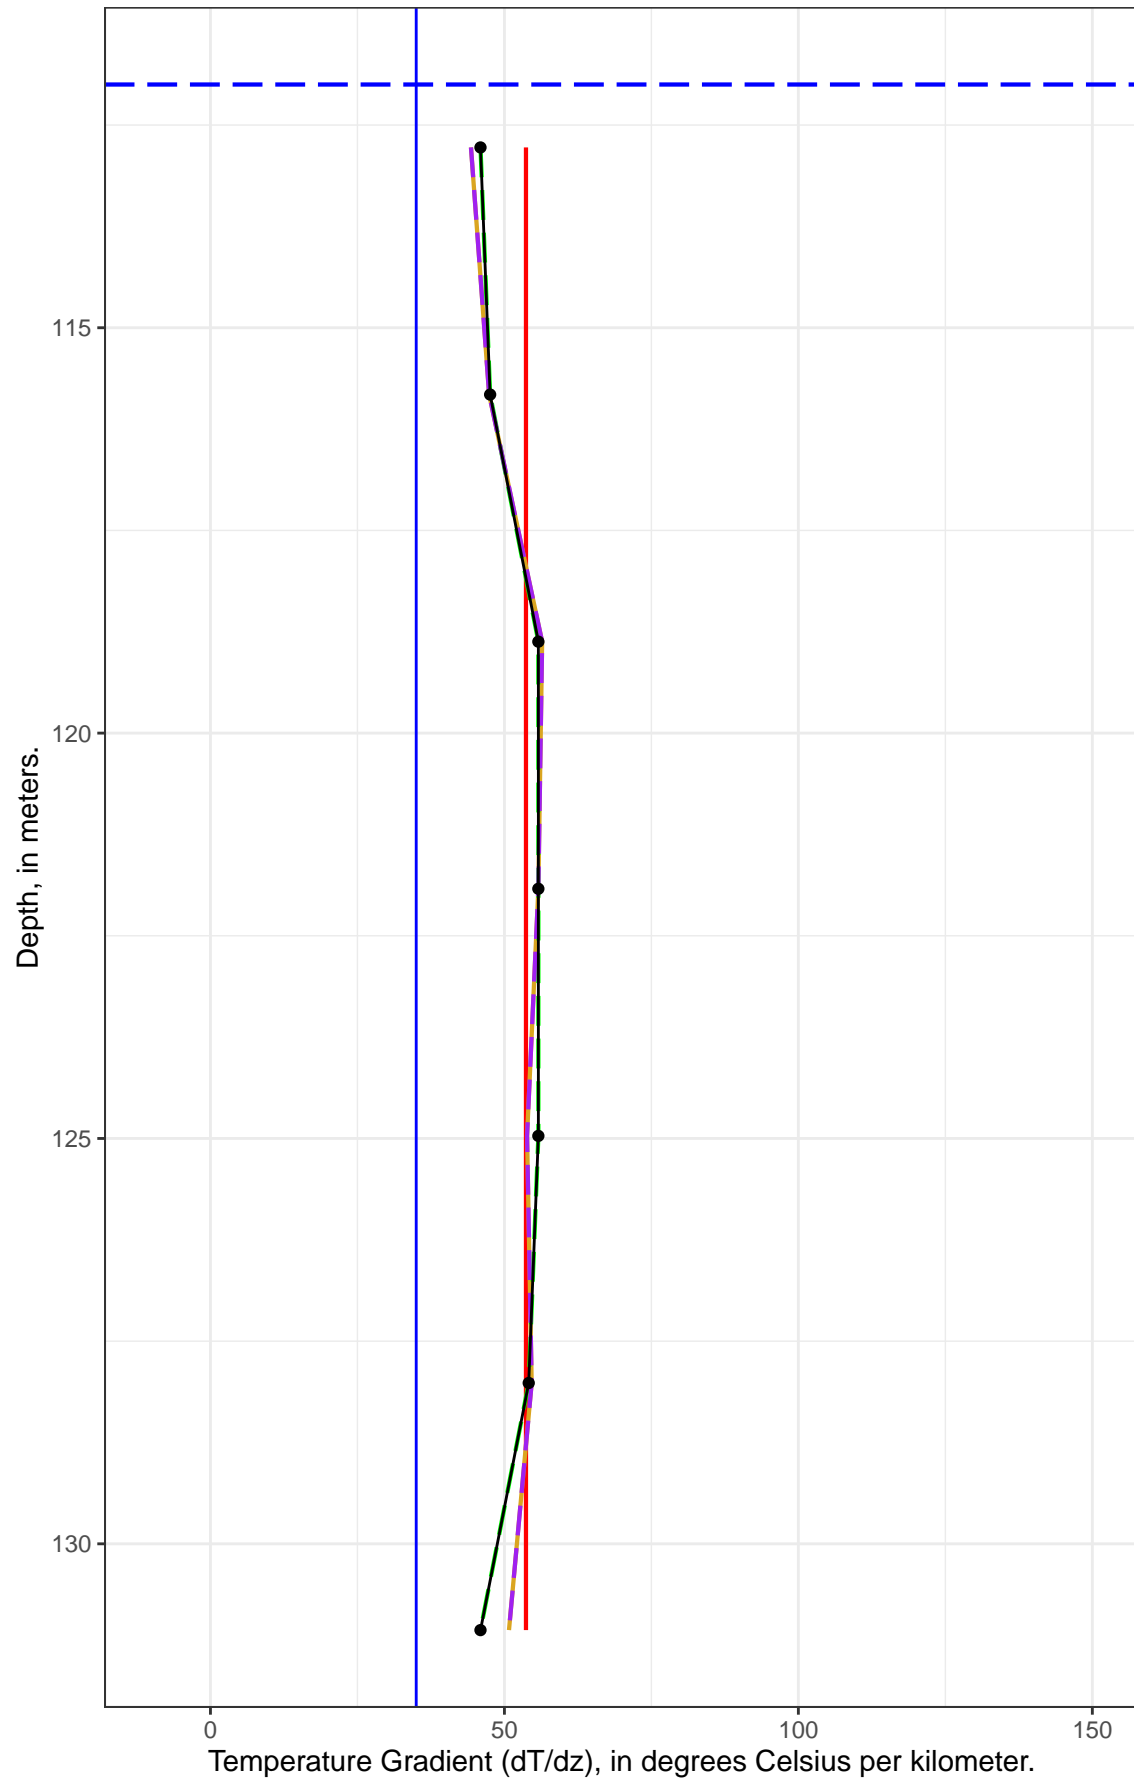

ID: 76 [H-2-80-1454\_KILBOURNE\_HOLE] Second Derivative

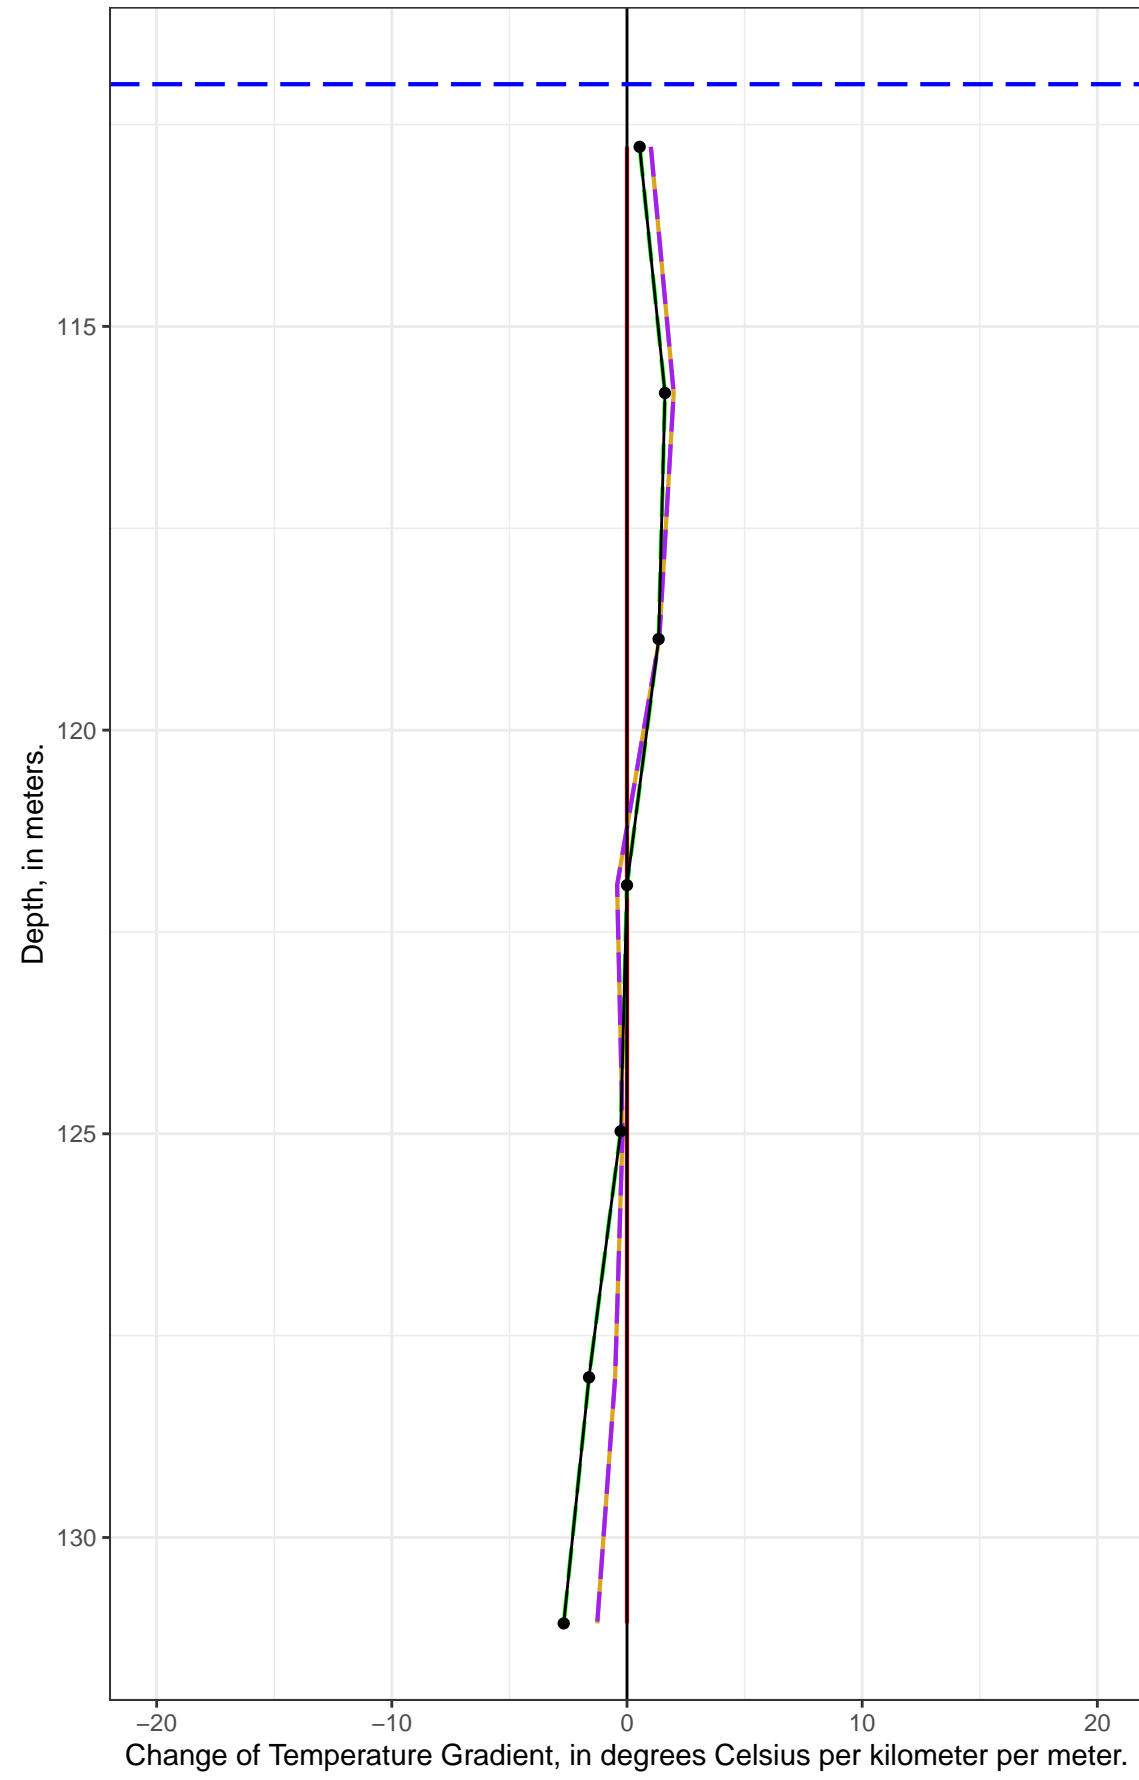

• Data — LOESS (AICC) — LOESS (constant) — LOESS (GCV) — Spline

• Data — LOESS (AICC) — LOESS (constant) — LOESS (GCV) — Spline

• Data — LOESS (AICC) — LOESS (constant) — LOESS (GCV) — Spline

ID: 77 [H-2-80-1457\_KILBOURNE\_HOLE] Smoothed Profile

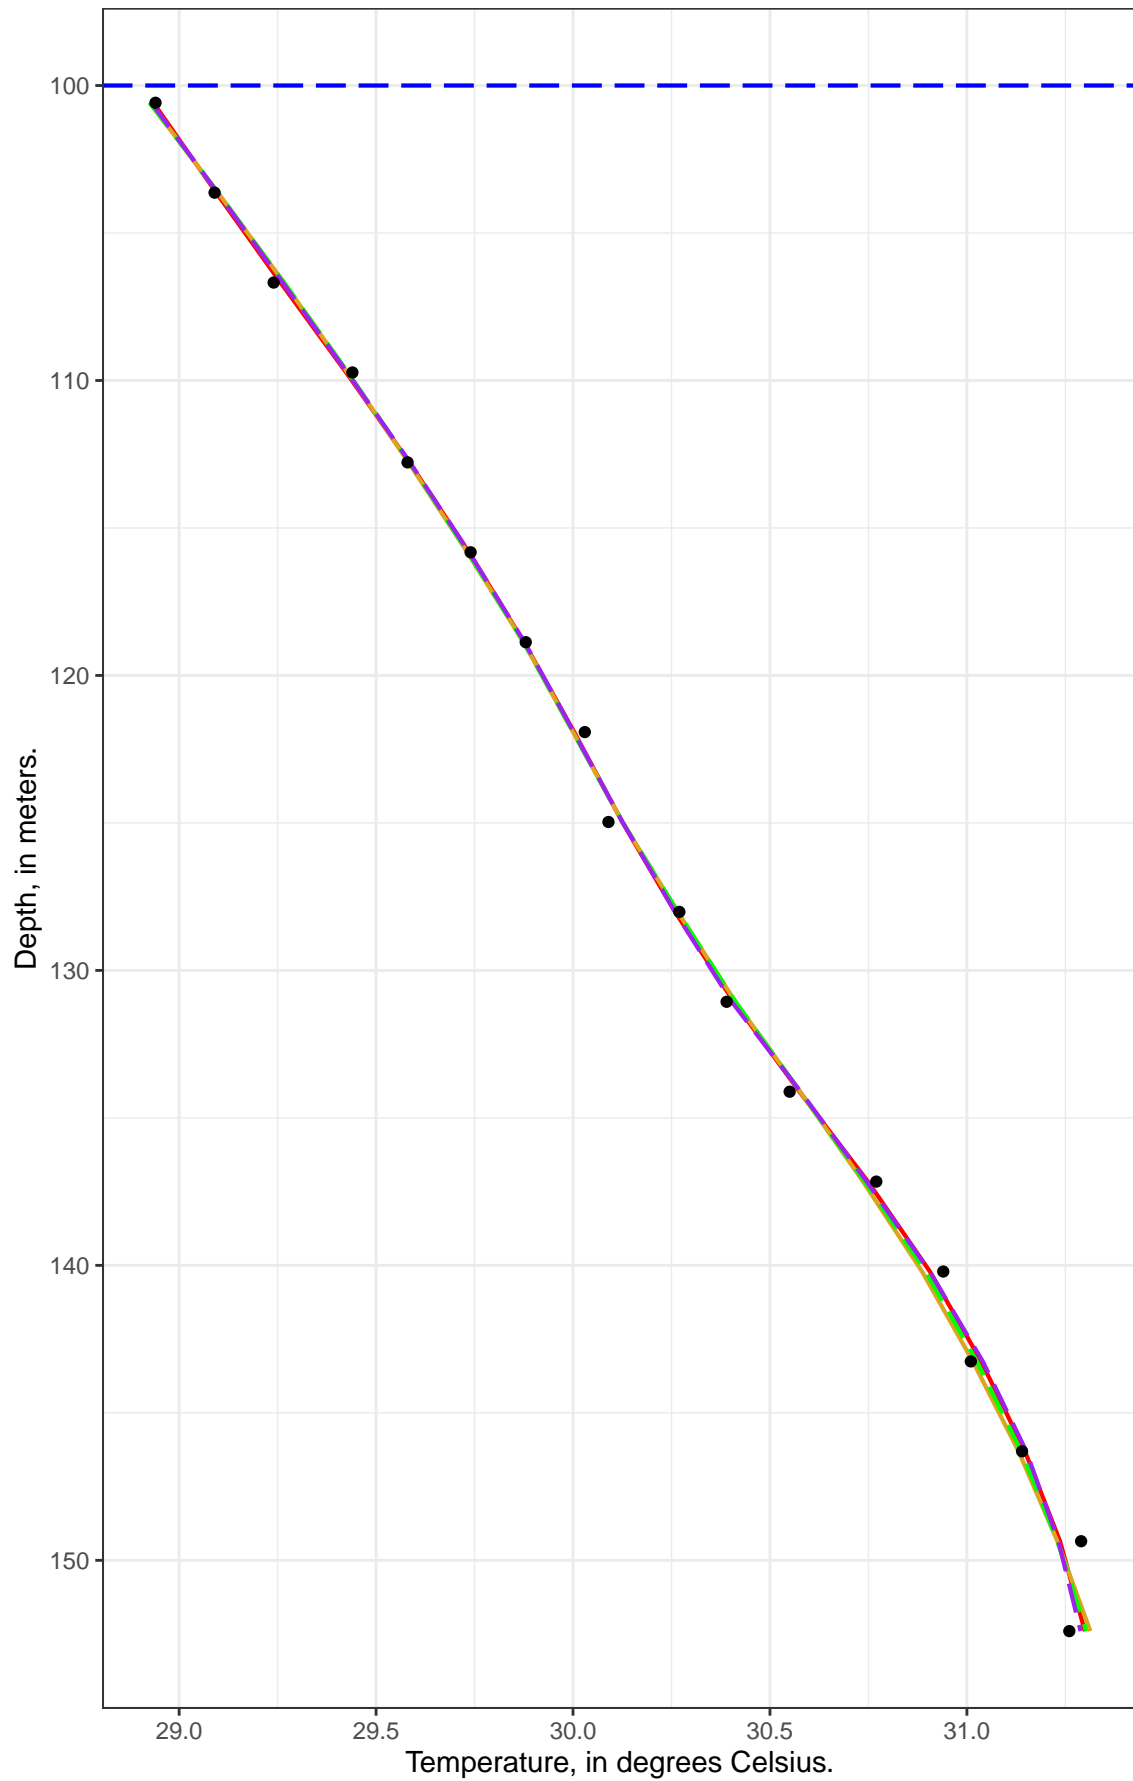

ID: 77 [H-2-80-1457\_KILBOURNE\_HOLE] First Derivative

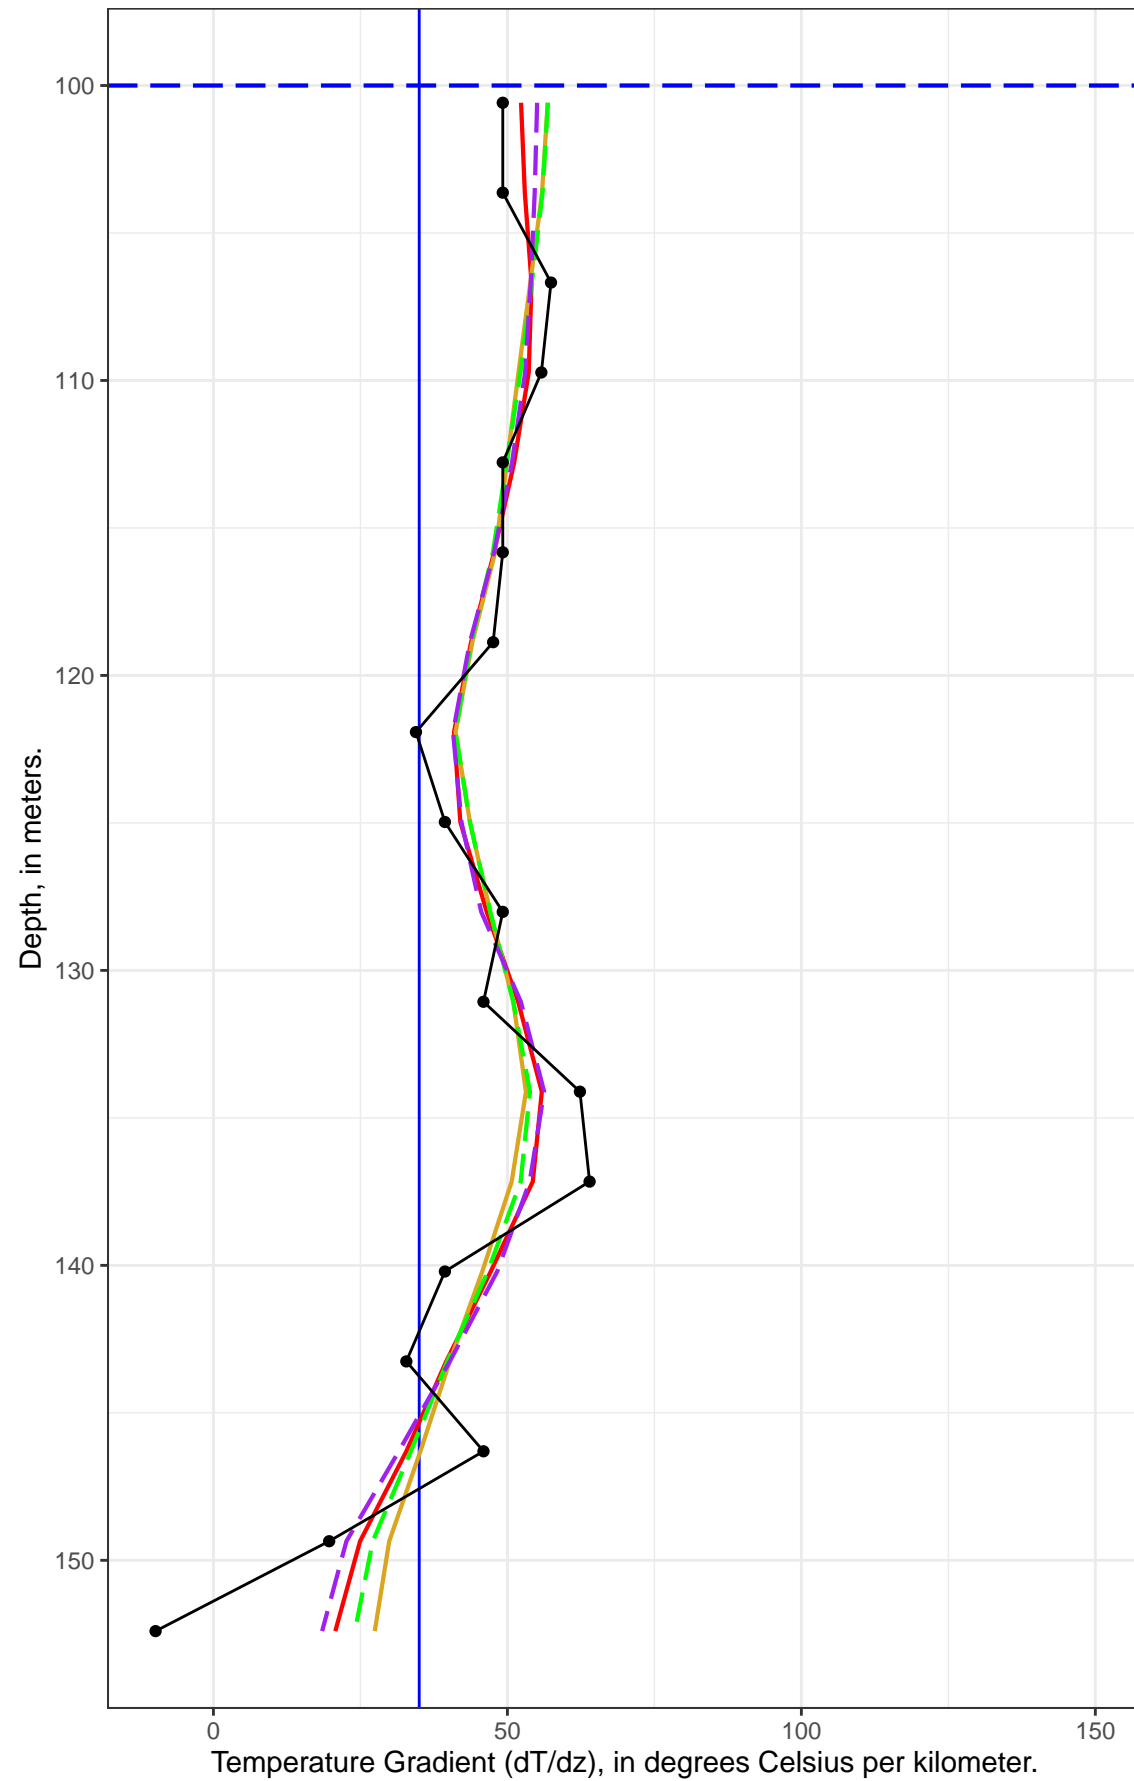

ID: 77 [H-2-80-1457\_KILBOURNE\_HOLE] Second Derivative

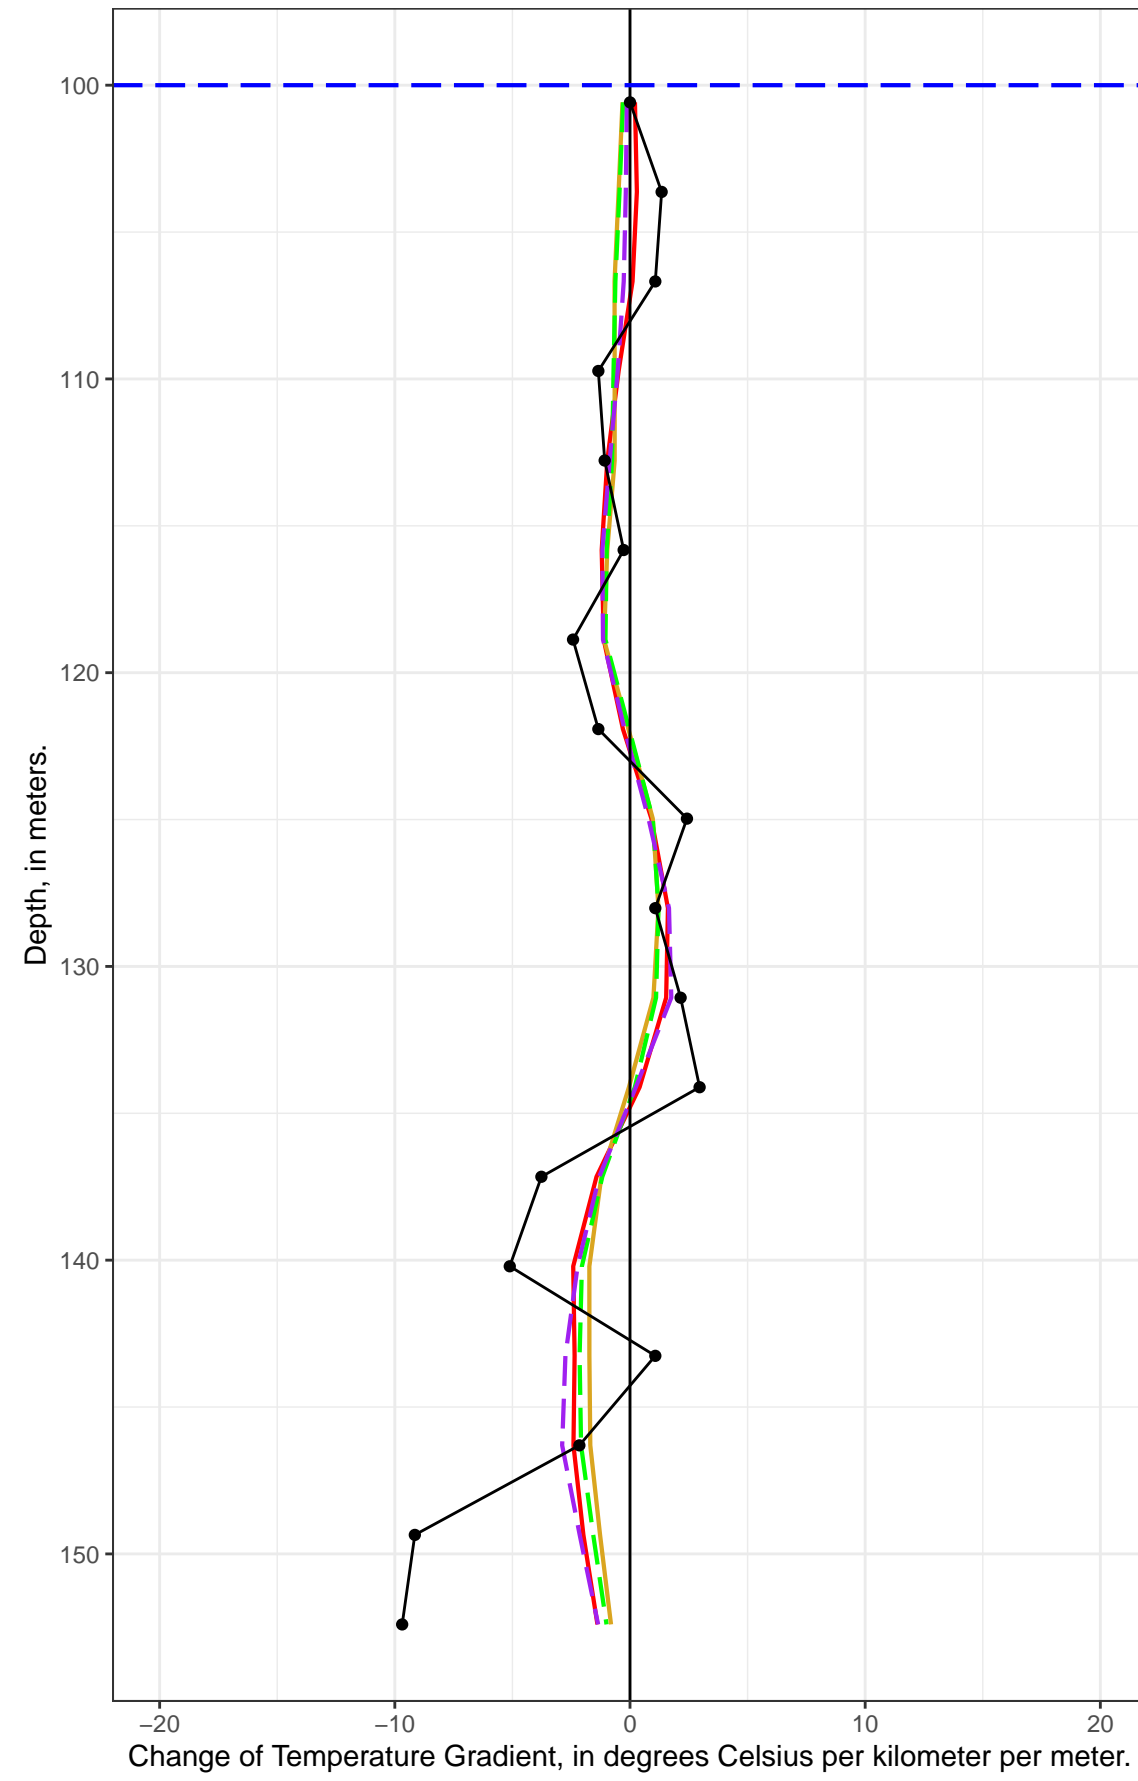

• Data • LOESS (AICC) • LOESS (constant) • LOESS (GCV) • Spline

• Data • LOESS (AICC) • LOESS (constant) • LOESS (GCV) • Spline

• Data • LOESS (AICC) • LOESS (constant) • LOESS (GCV) • Spline

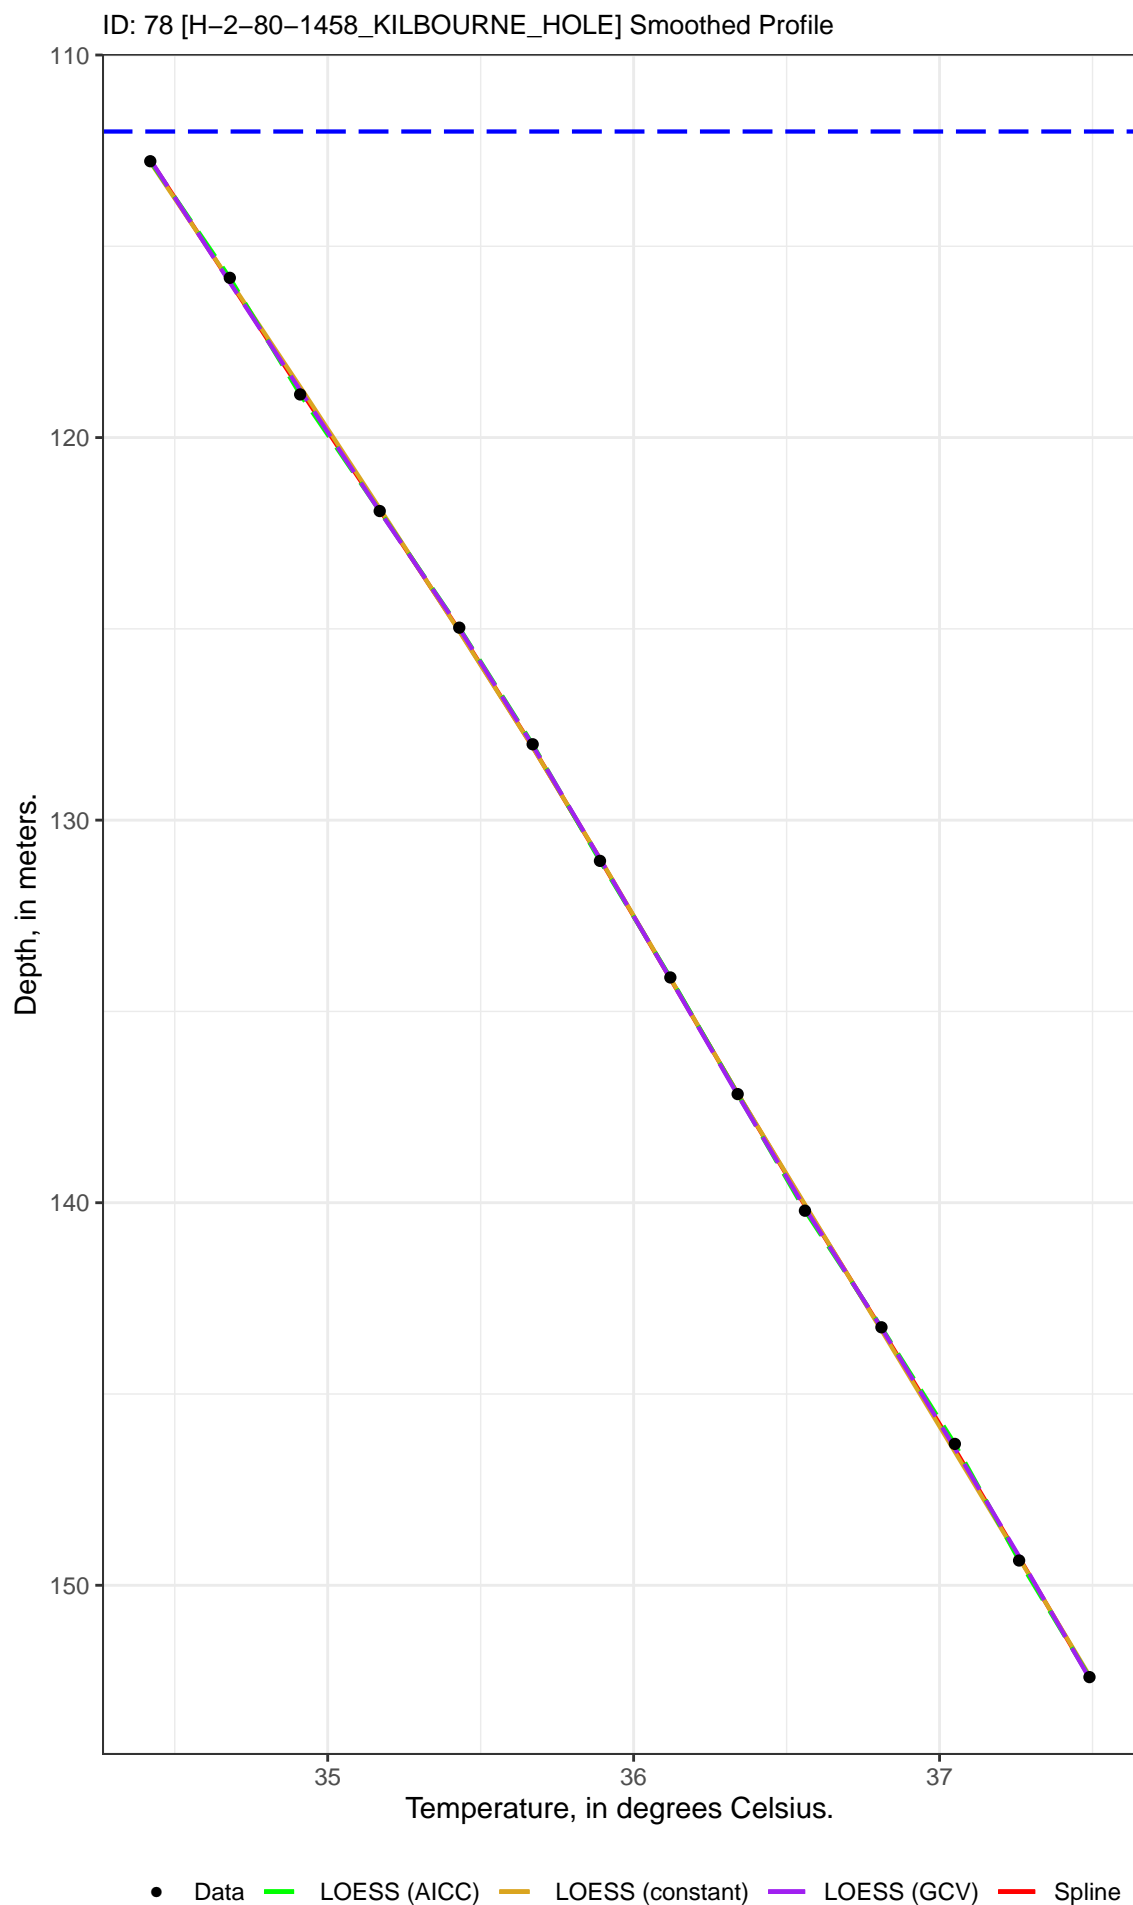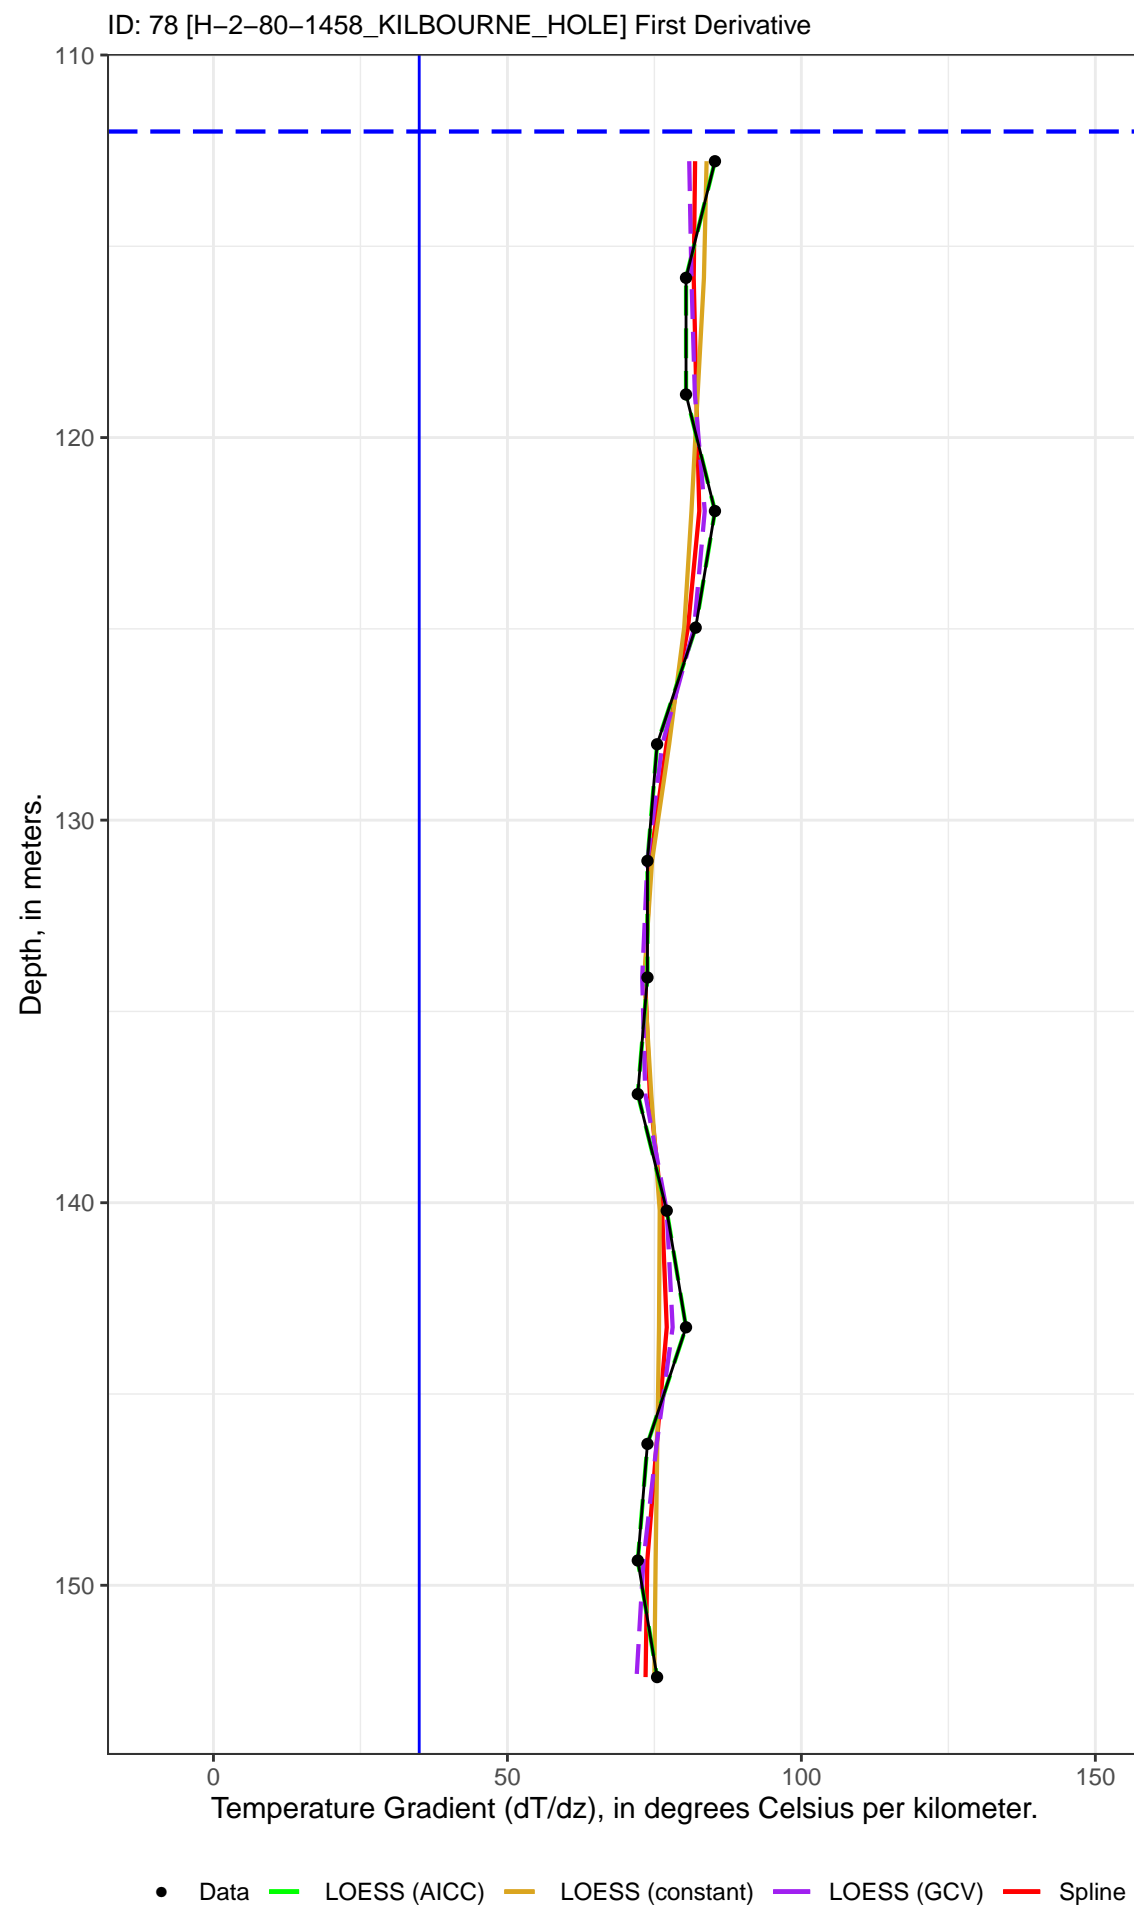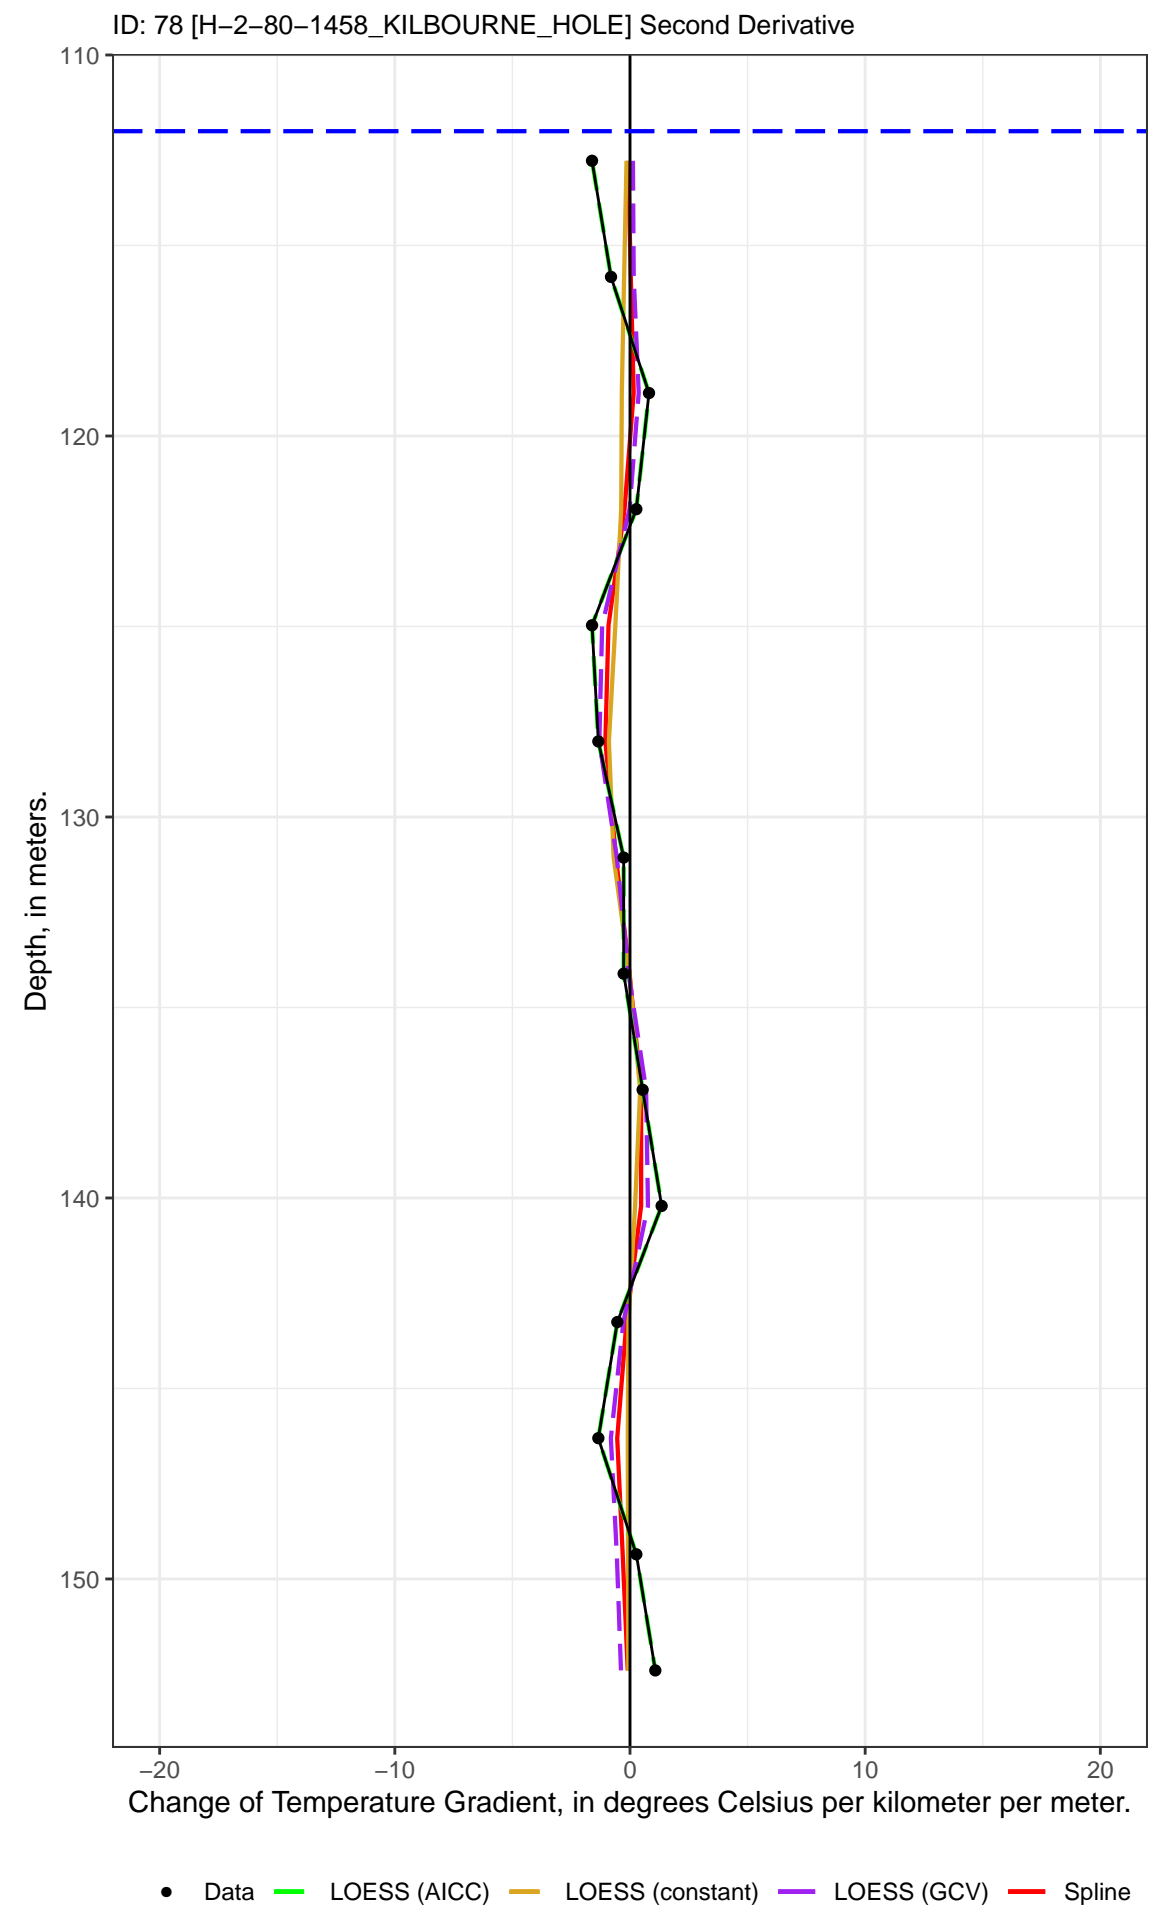

ID: 79 [H-2-80-1459\_KILBOURNE\_HOLE] Smoothed Profile

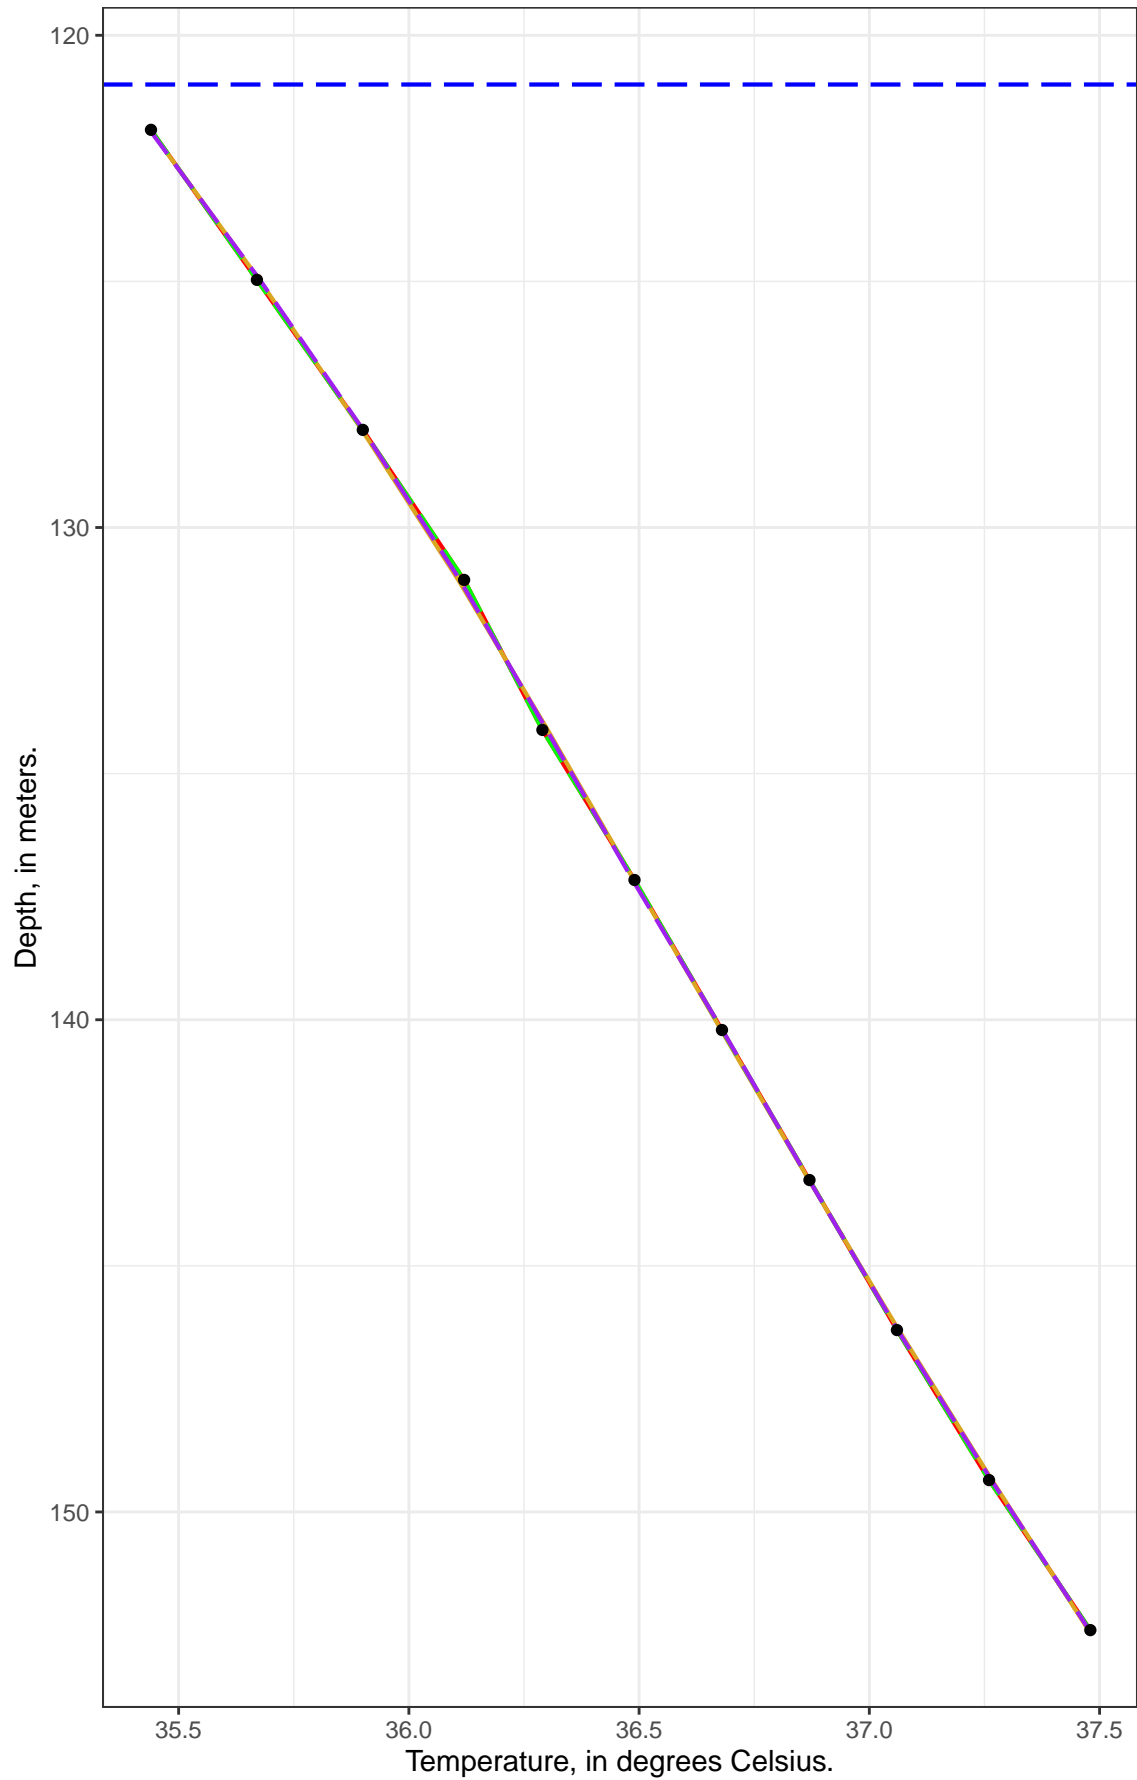

ID: 79 [H-2-80-1459\_KILBOURNE\_HOLE] First Derivative

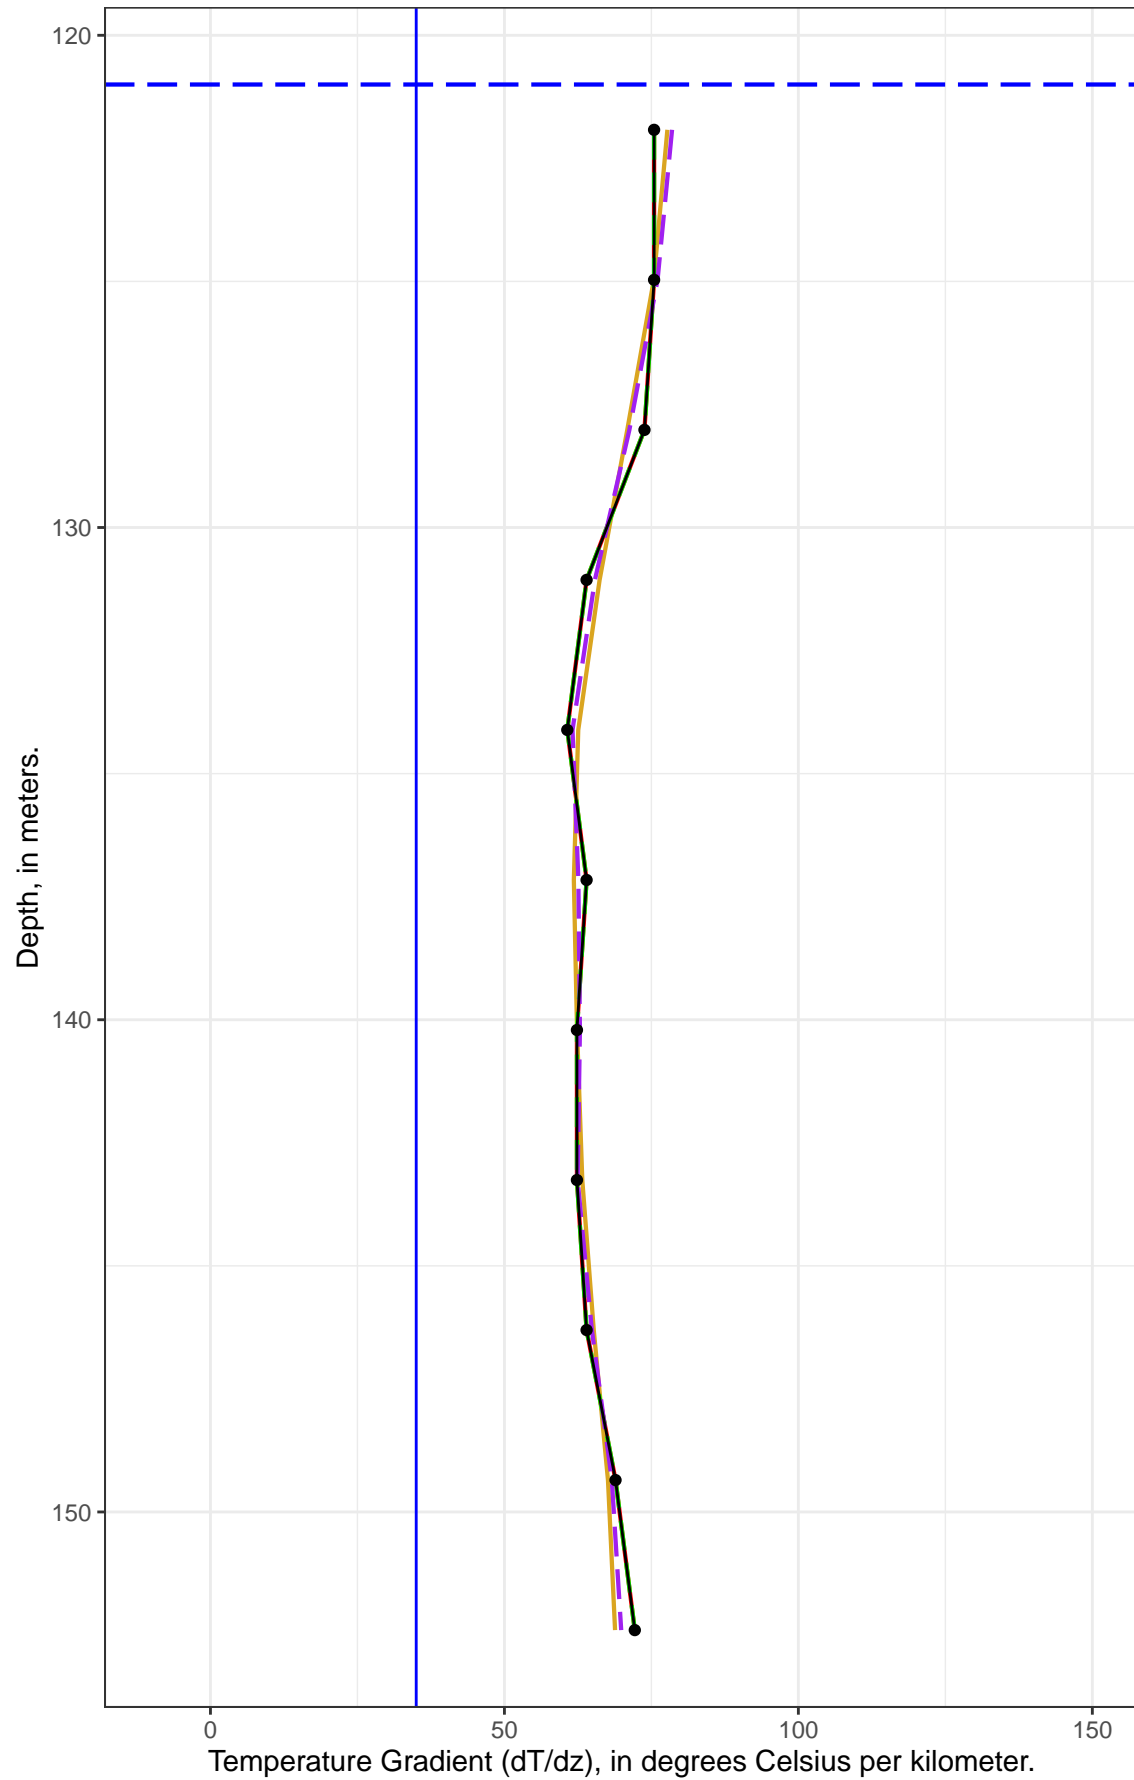

ID: 79 [H-2-80-1459\_KILBOURNE\_HOLE] Second Derivative

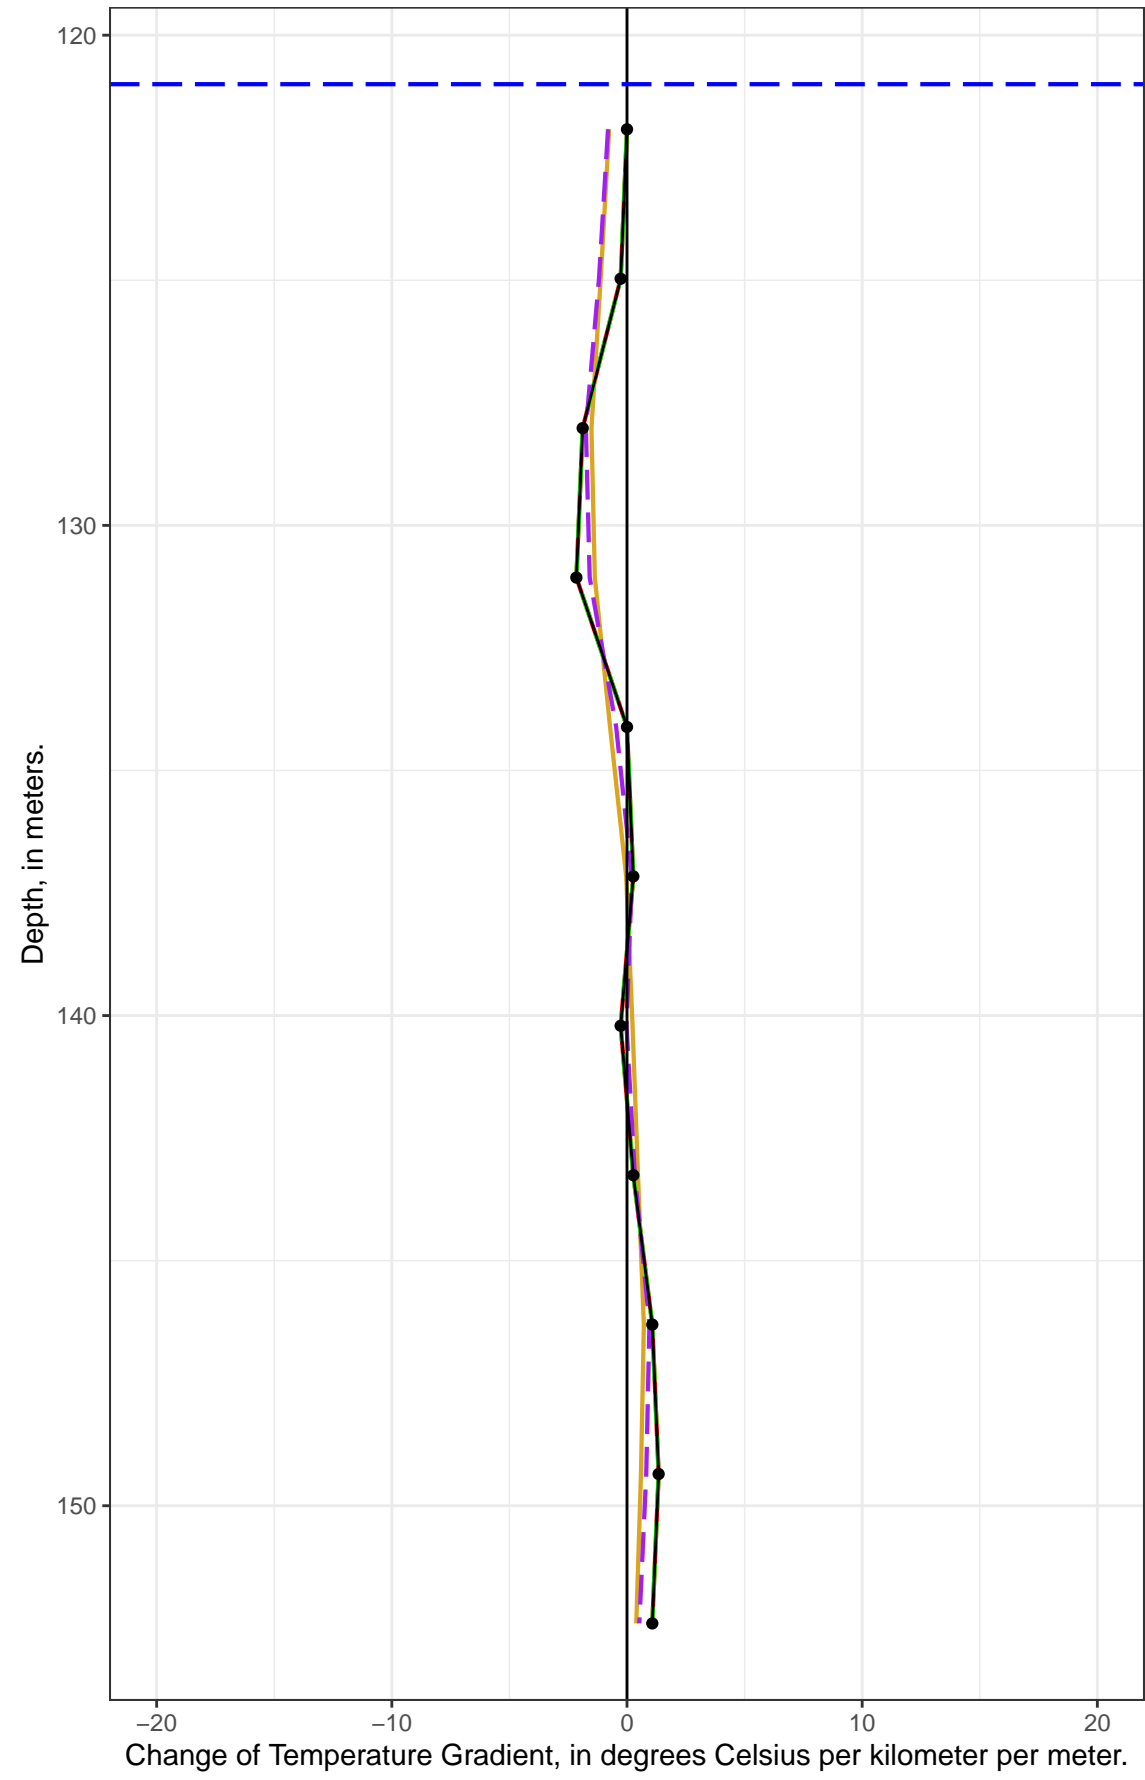

• Data • LOESS (AICC) • LOESS (constant) • LOESS (GCV) • Spline

• Data • LOESS (AICC) • LOESS (constant) • LOESS (GCV) • Spline

• Data • LOESS (AICC) • LOESS (constant) • LOESS (GCV) • Spline

ID: 80 [H-2-80-1460\_KILBOURNE\_HOLE] Smoothed Profile

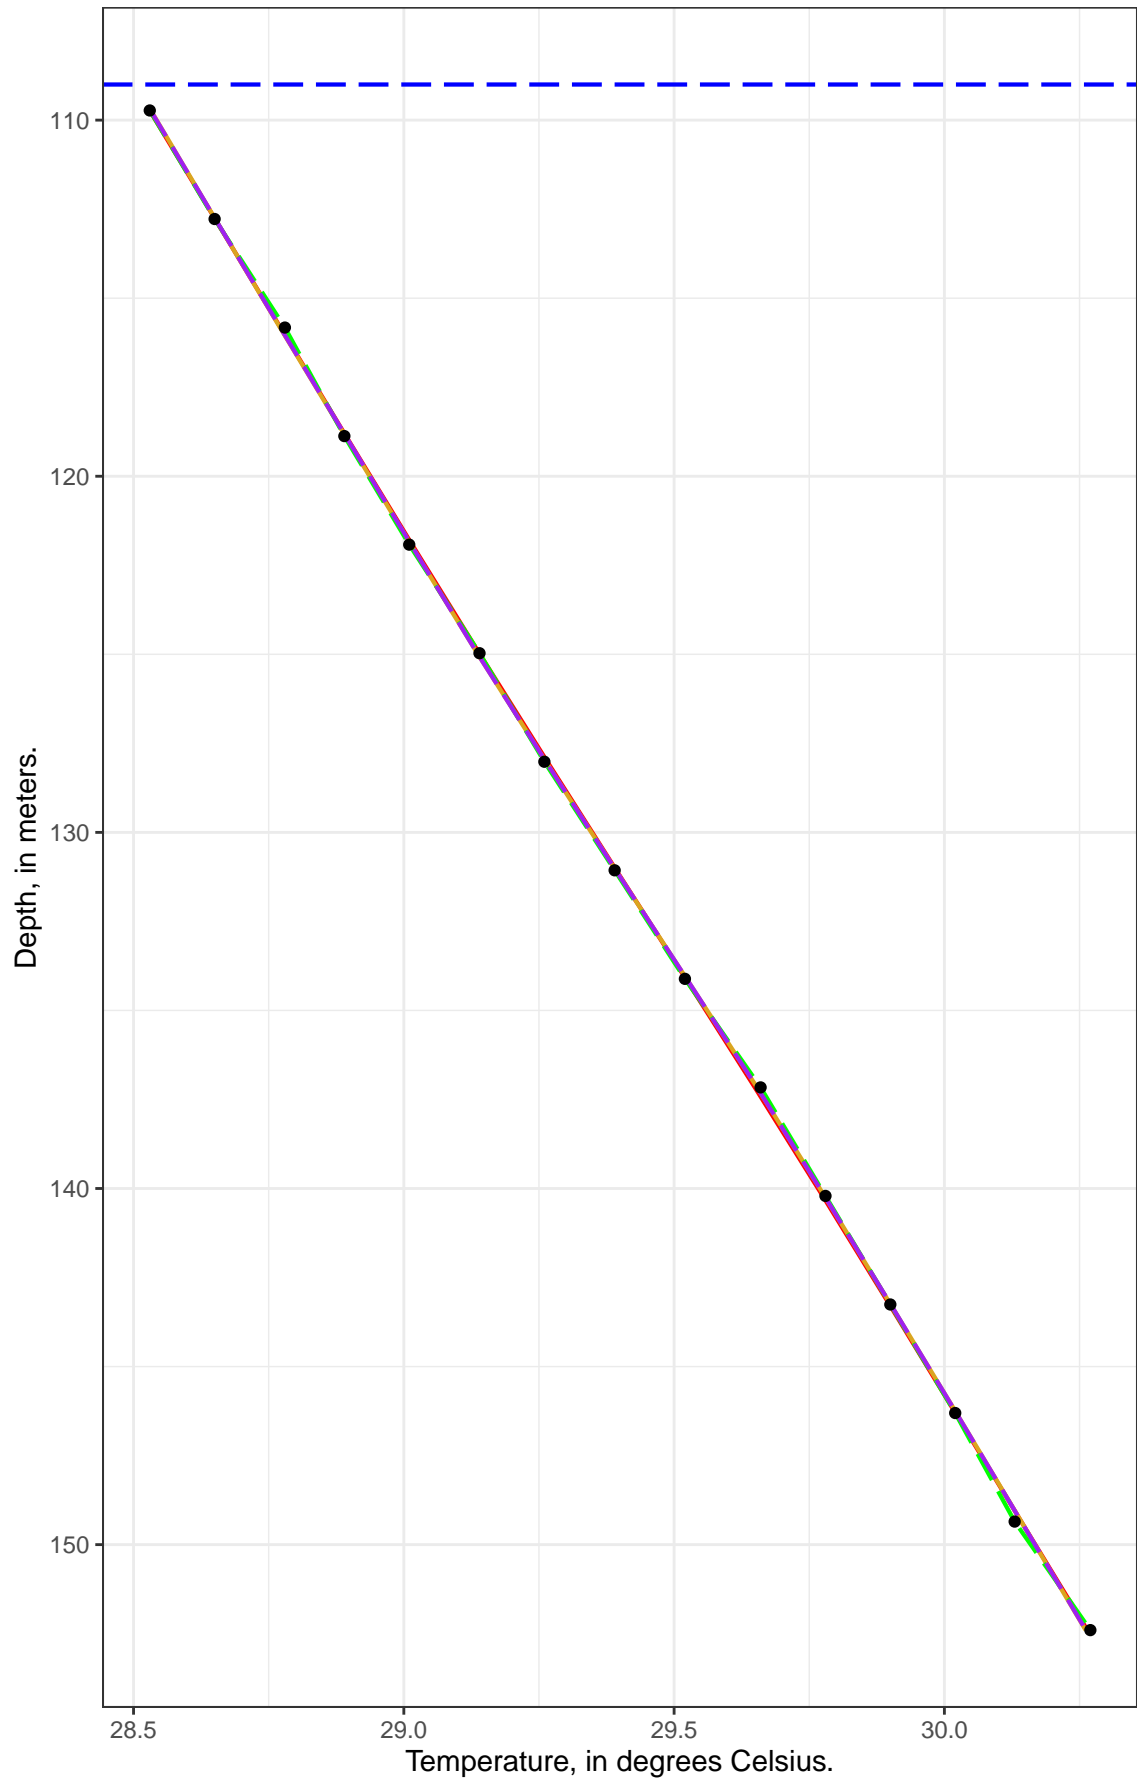

ID: 80 [H-2-80-1460\_KILBOURNE\_HOLE] First Derivative

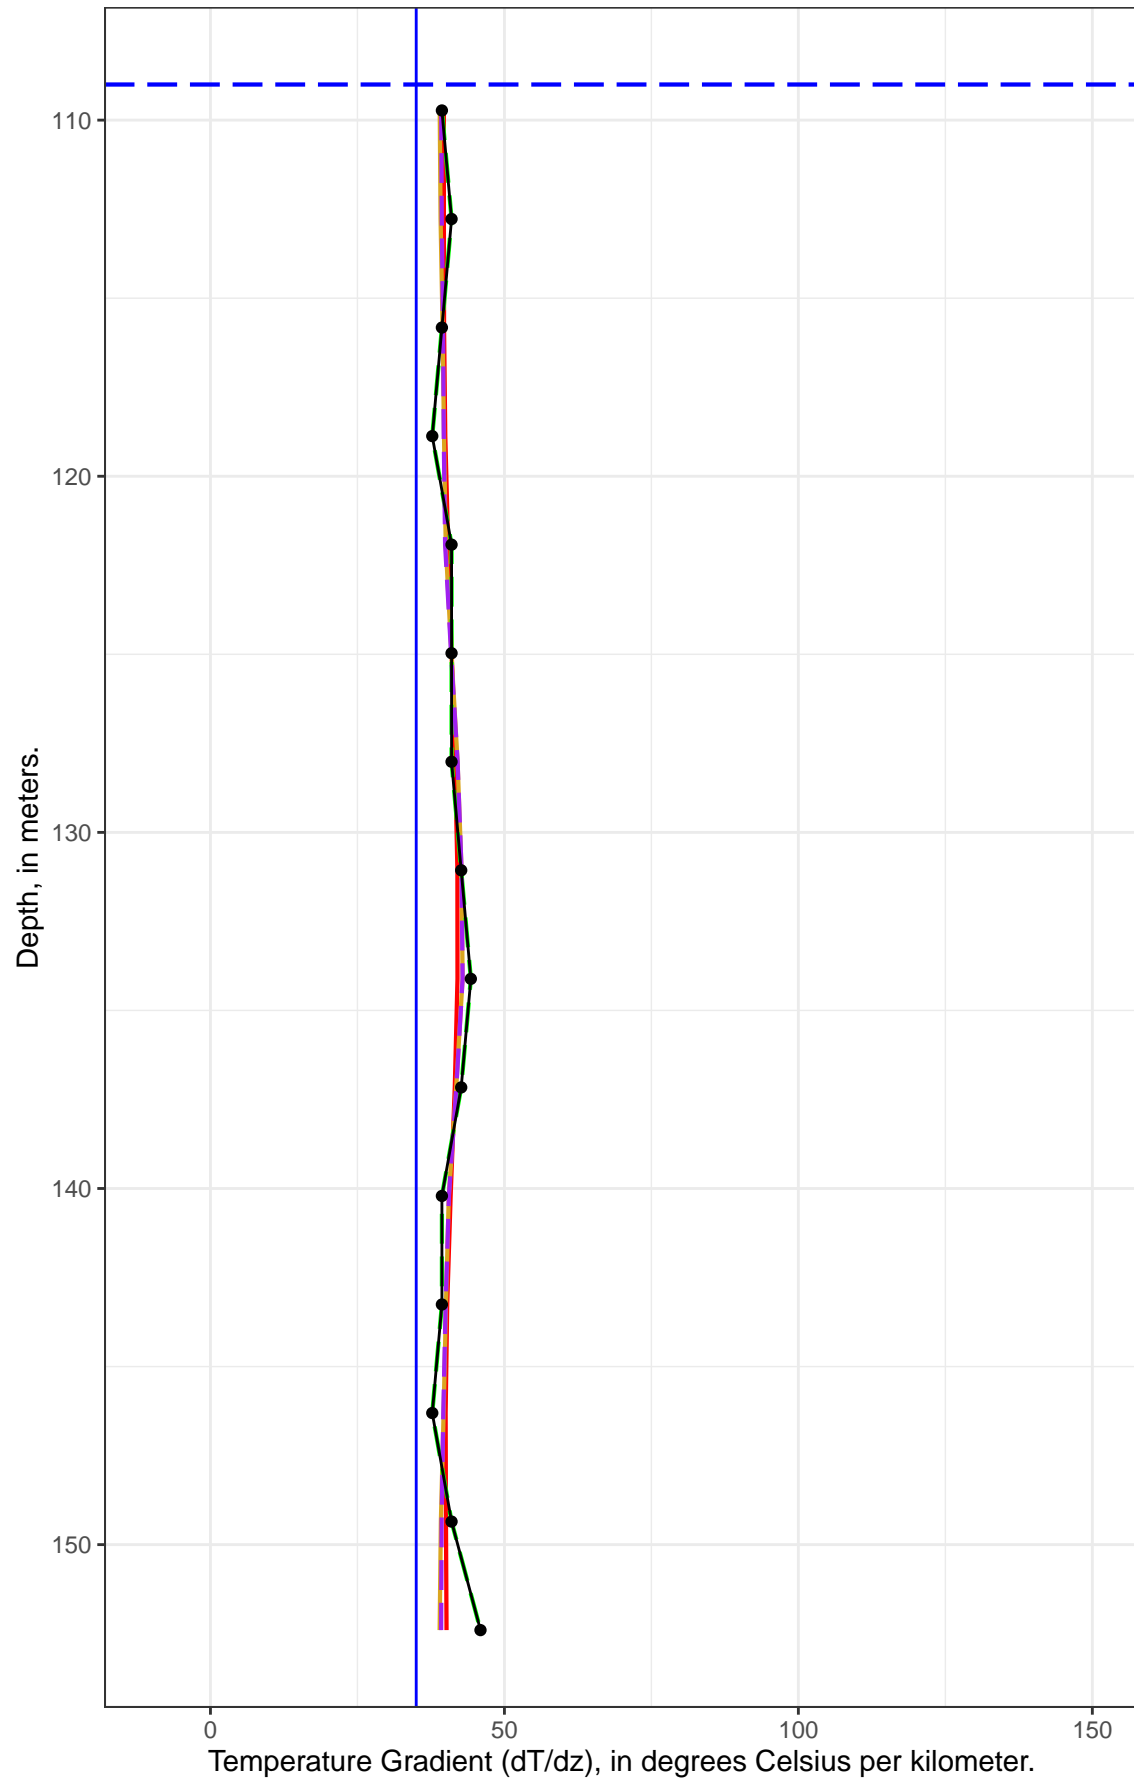

ID: 80 [H-2-80-1460\_KILBOURNE\_HOLE] Second Derivative

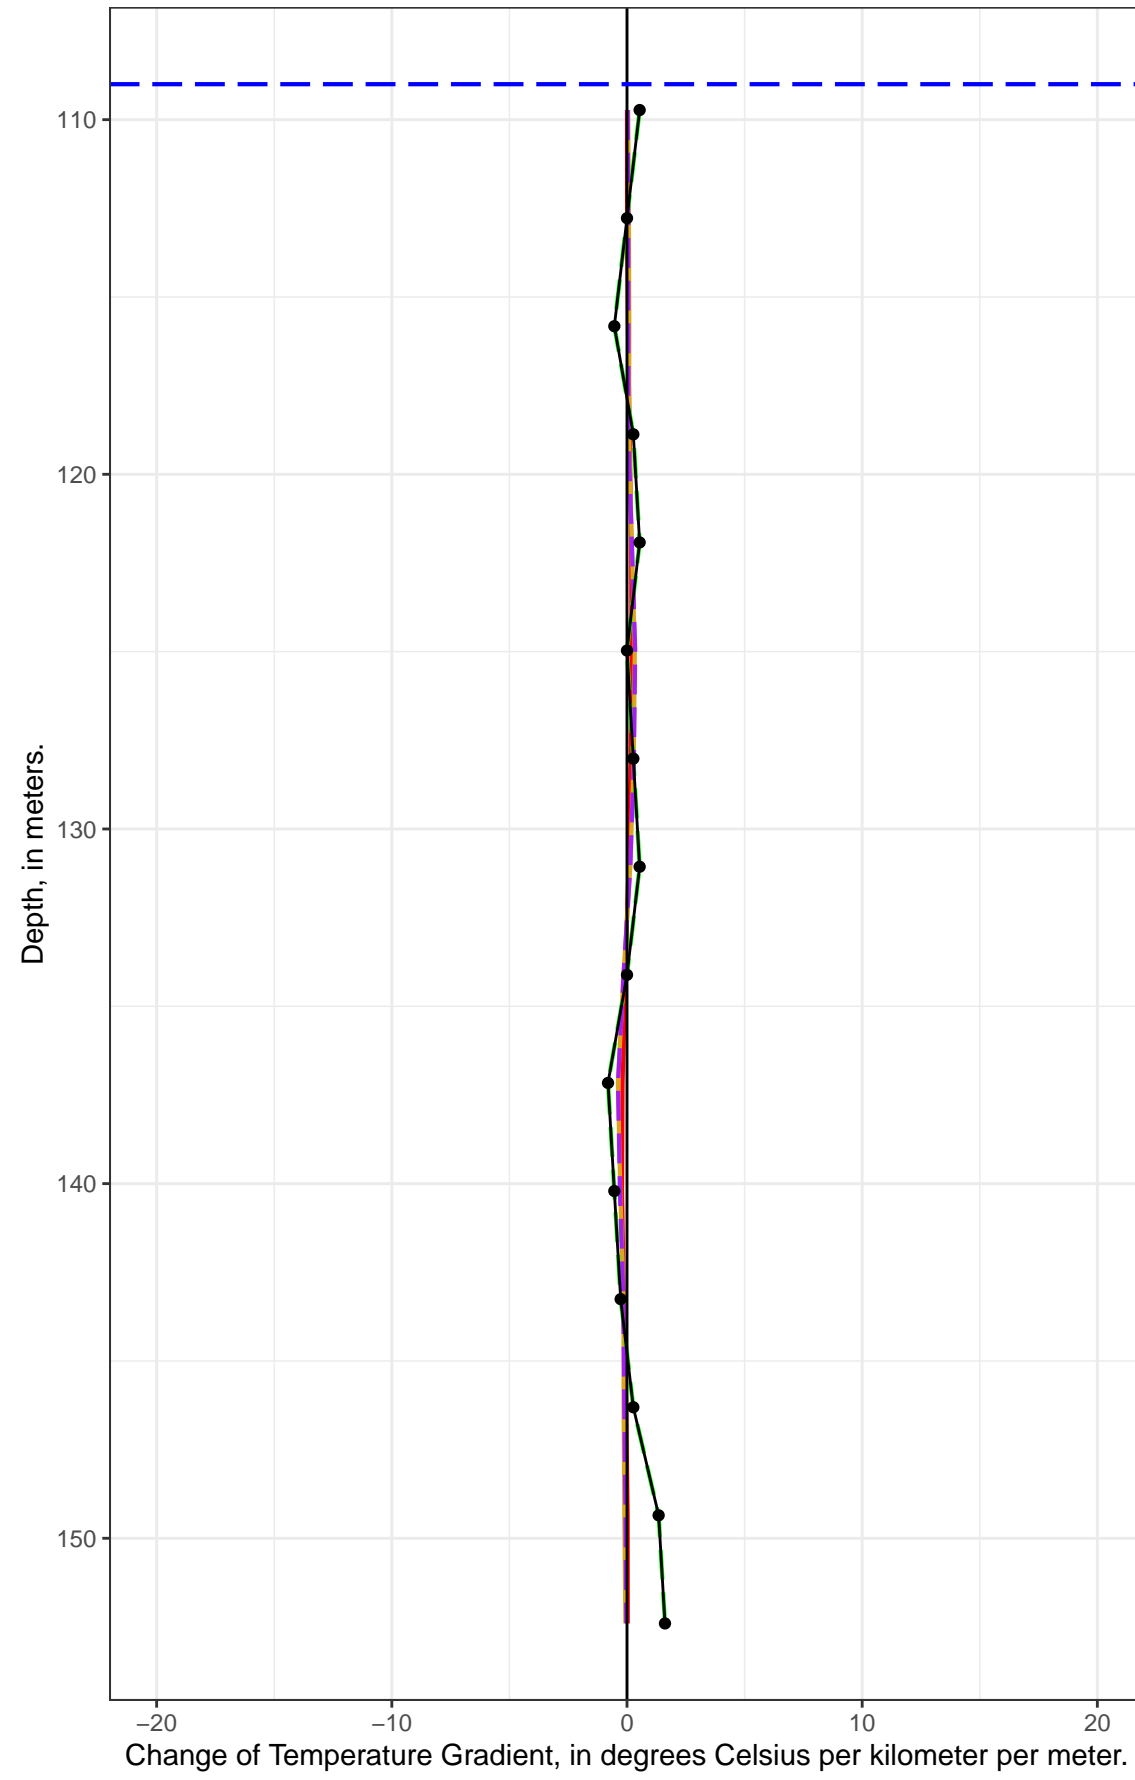

• Data — LOESS (AICC) — LOESS (constant) — LOESS (GCV) — Spline

• Data — LOESS (AICC) — LOESS (constant) — LOESS (GCV) — Spline

• Data — LOESS (AICC) — LOESS (constant) — LOESS (GCV) — Spline

ID: 82 [H-2-80-1462\_KILBOURNE\_HOLE] Smoothed Profile

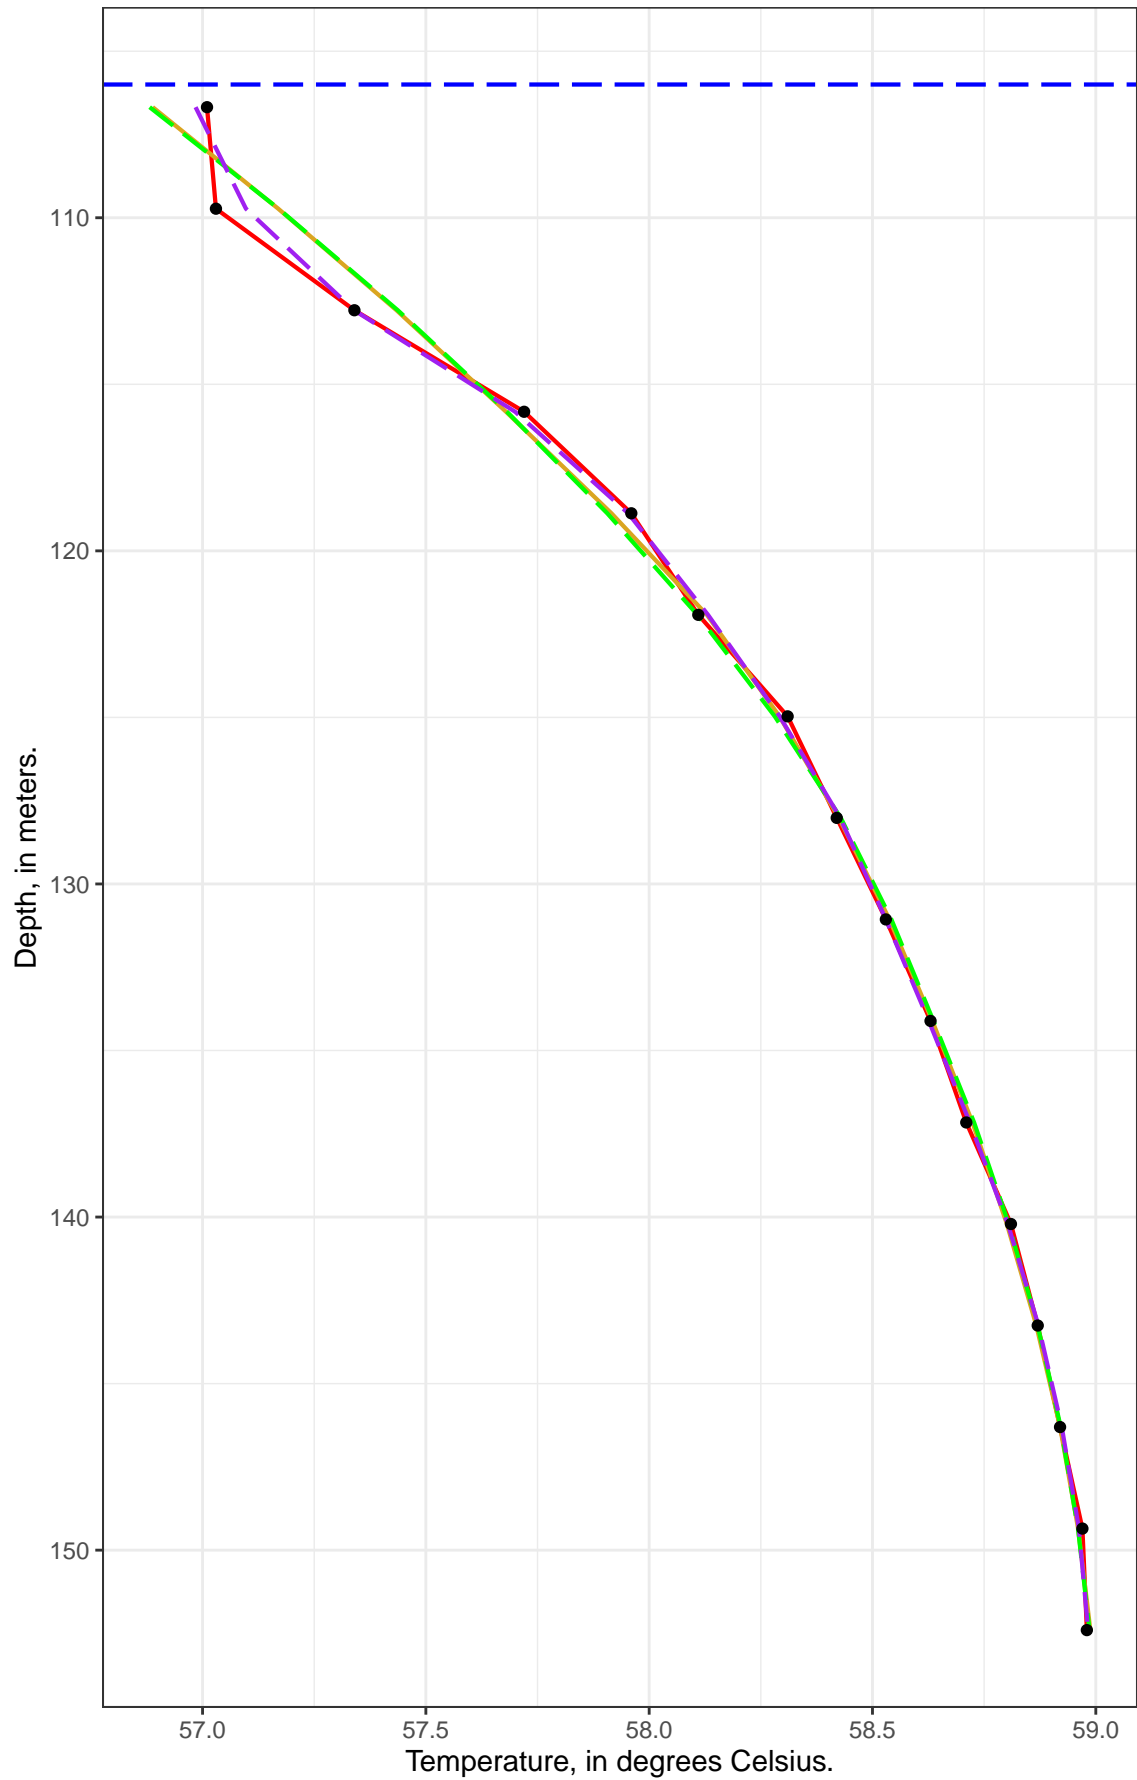

ID: 82 [H-2-80-1462\_KILBOURNE\_HOLE] First Derivative

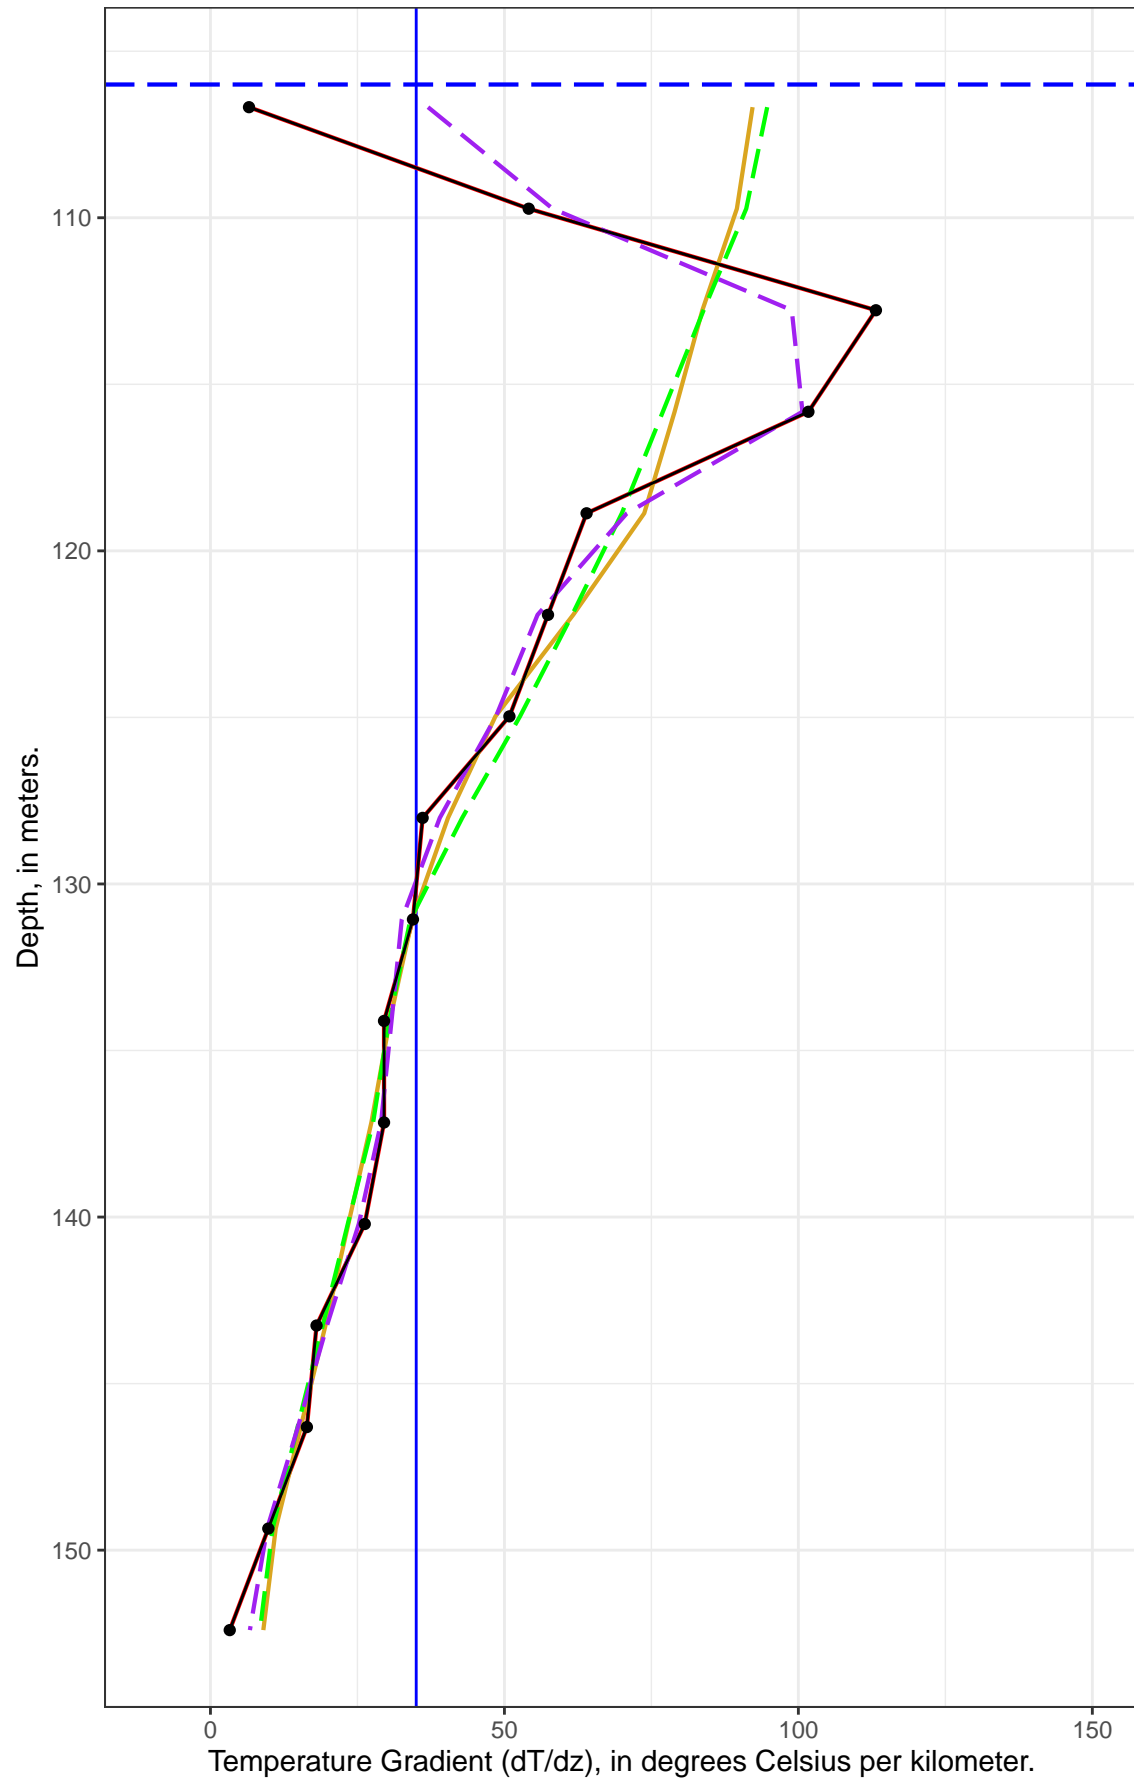

ID: 82 [H-2-80-1462\_KILBOURNE\_HOLE] Second Derivative

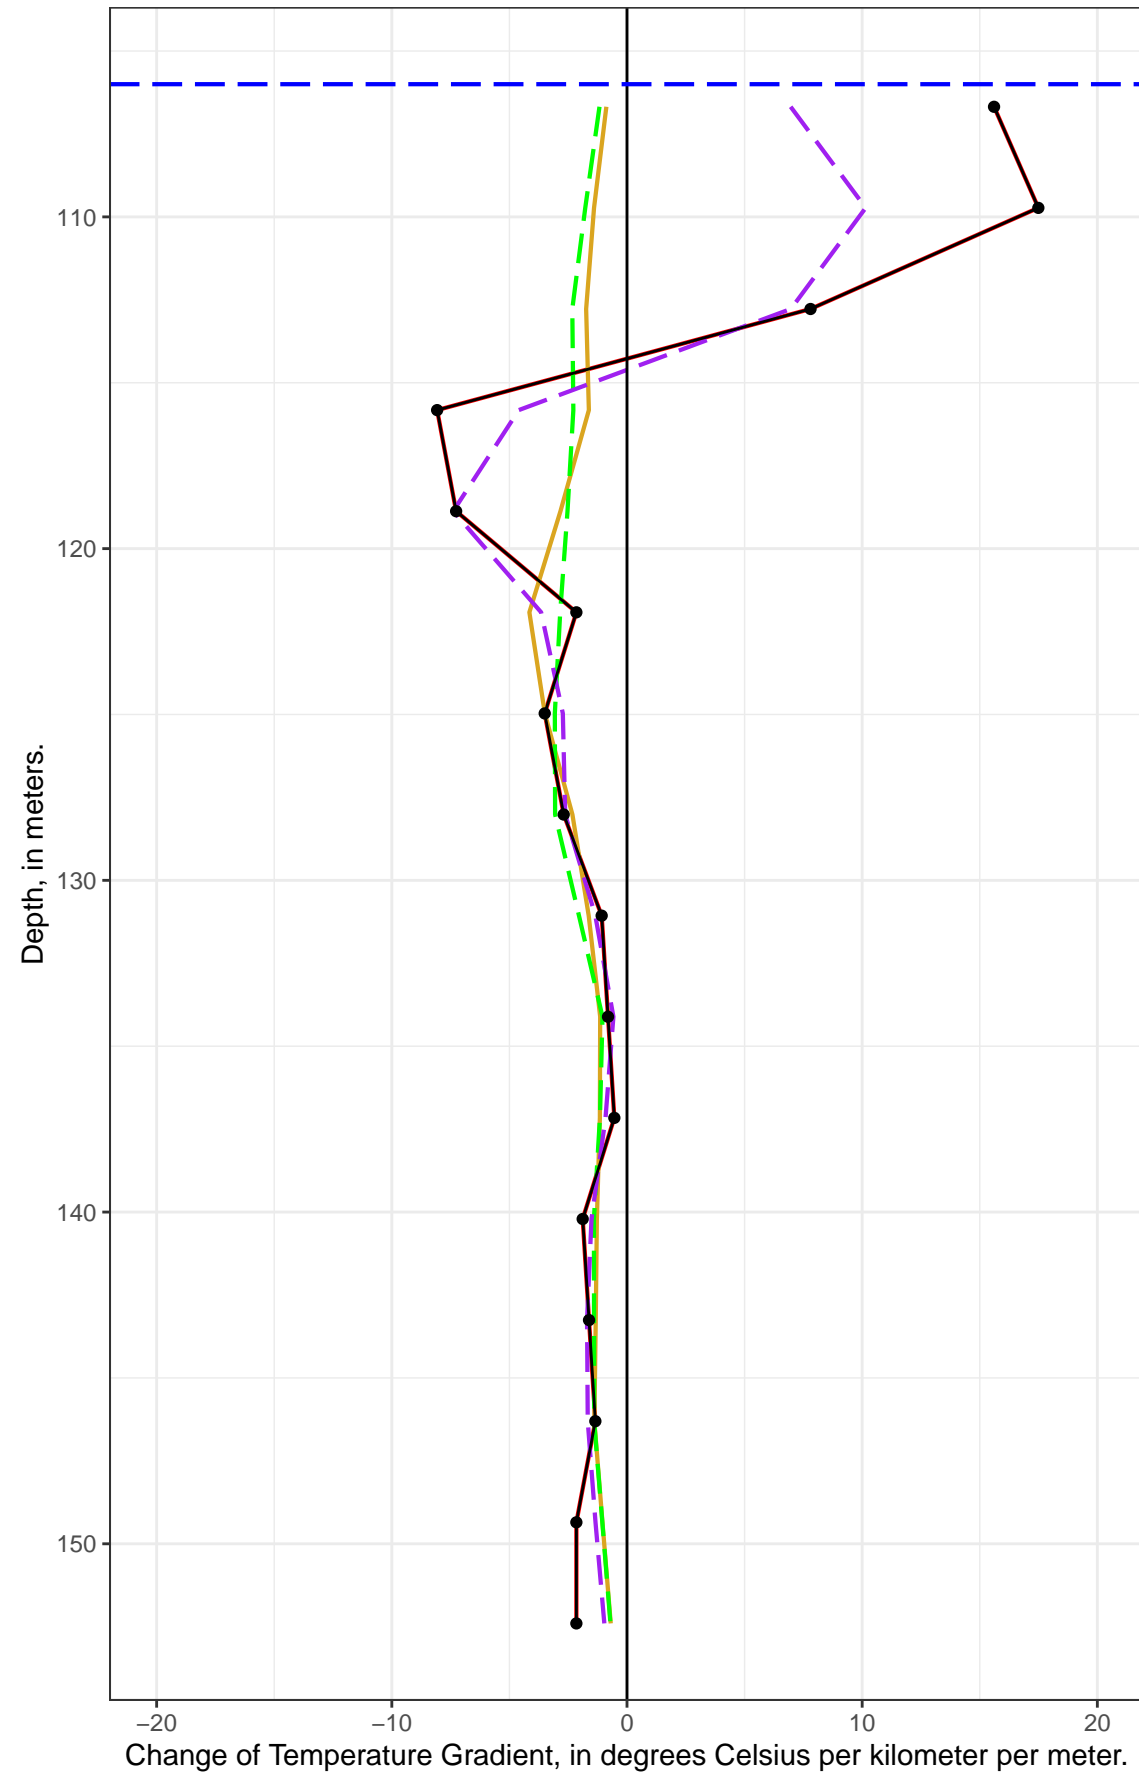

• Data — LOESS (AICC) — LOESS (constant) — LOESS (GCV) — Spline

• Data — LOESS (AICC) — LOESS (constant) — LOESS (GCV) — Spline

• Data — LOESS (AICC) — LOESS (constant) — LOESS (GCV) — Spline

ID: 83 [H-2-80-1464\_KILBOURNE\_HOLE] Smoothed Profile

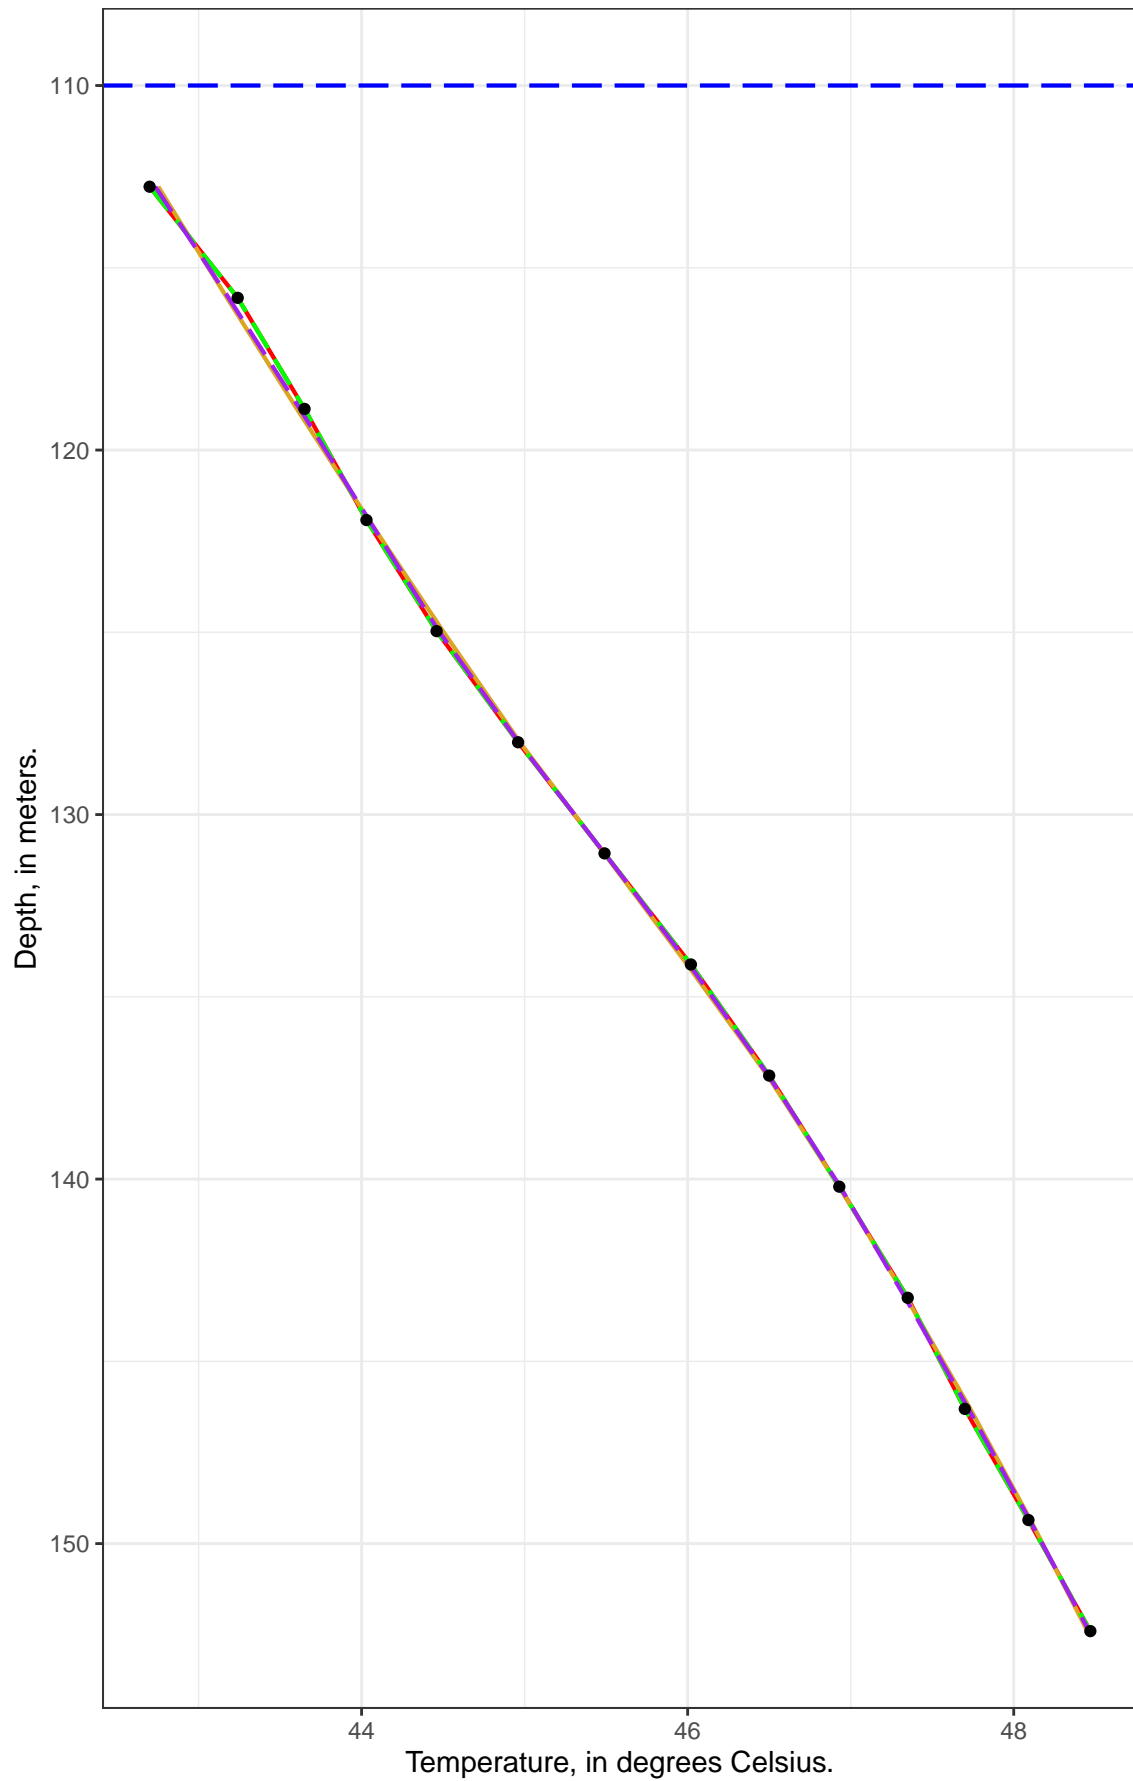

• Data — LOESS (AICC) — LOESS (constant) — LOESS (GCV) — Spline

ID: 83 [H-2-80-1464\_KILBOURNE\_HOLE] First Derivative

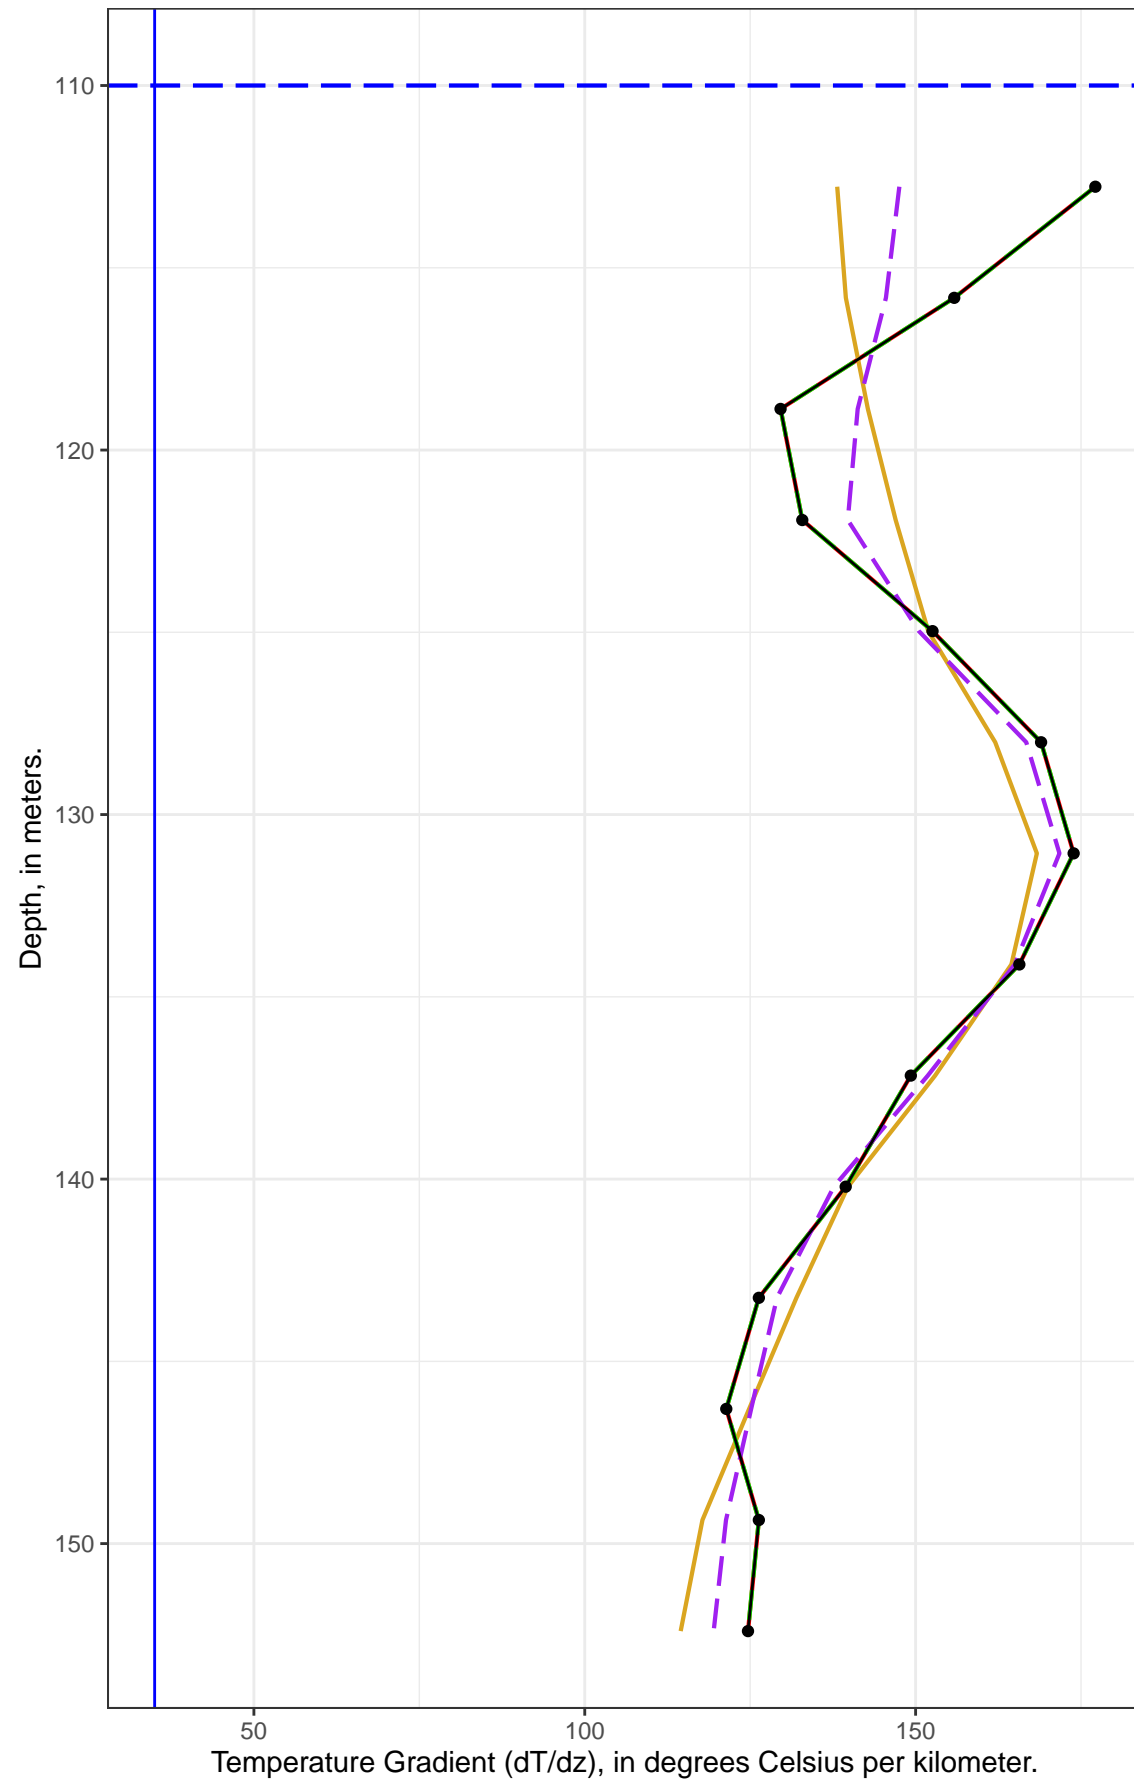

• Data — LOESS (AICC) — LOESS (constant) — LOESS (GCV) — Spline

ID: 83 [H-2-80-1464\_KILBOURNE\_HOLE] Second Derivative

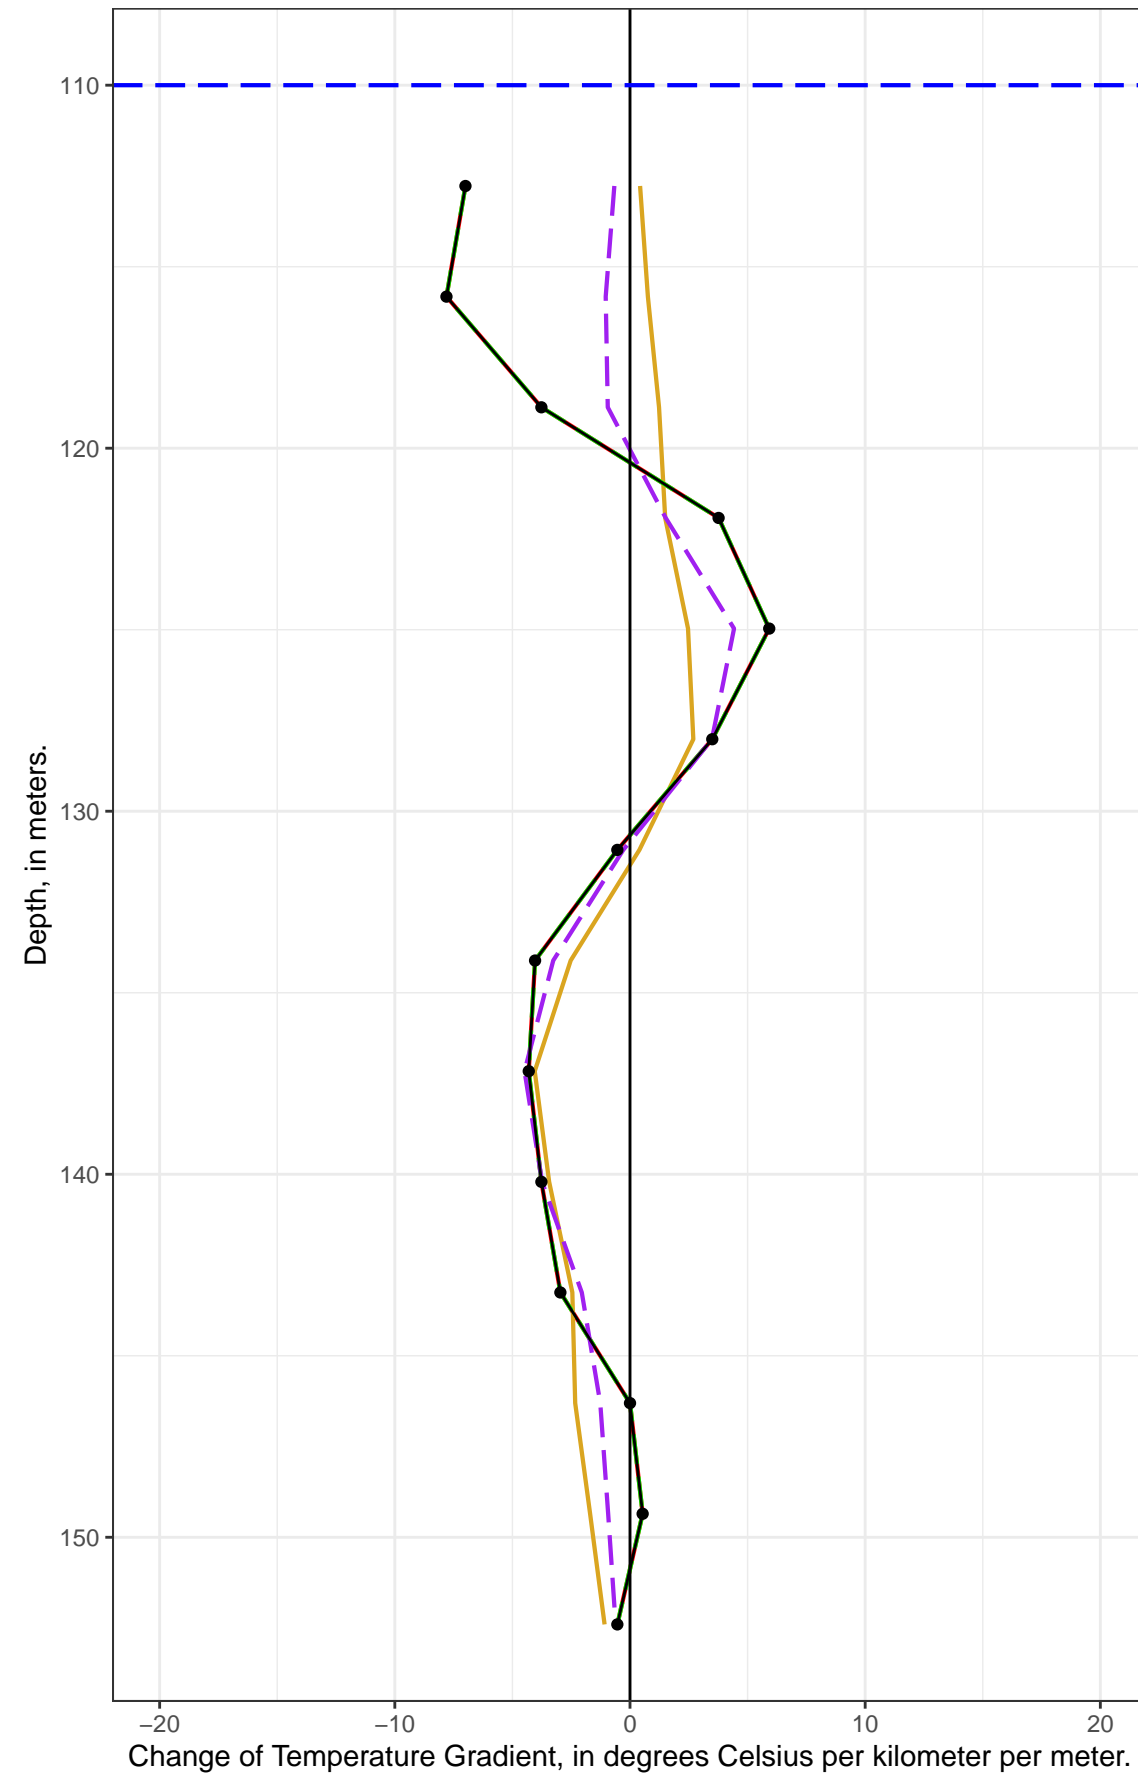

• Data — LOESS (AICC) — LOESS (constant) — LOESS (GCV) — Spline



ID: 84 [H-2-80-1464B\_KILBOURNE\_HOLE] Smoothed Profile

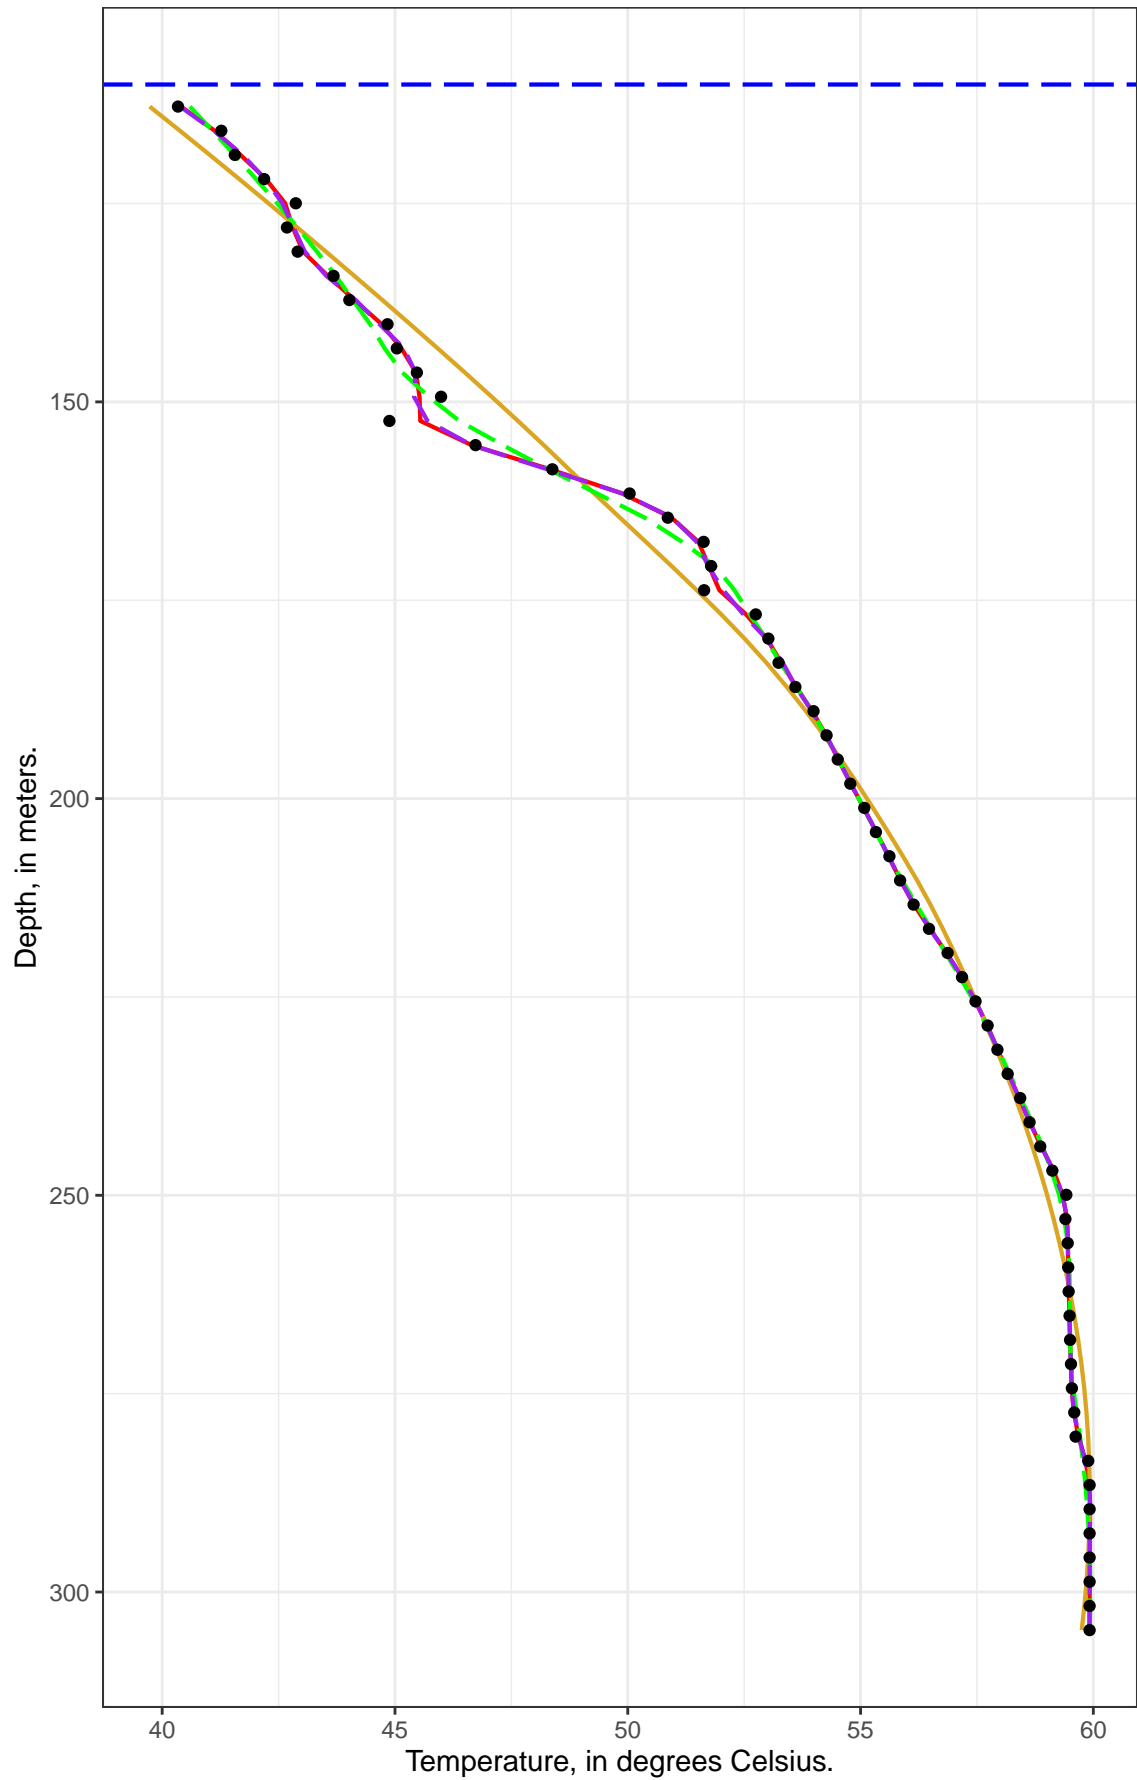

ID: 84 [H-2-80-1464B\_KILBOURNE\_HOLE] First Derivative

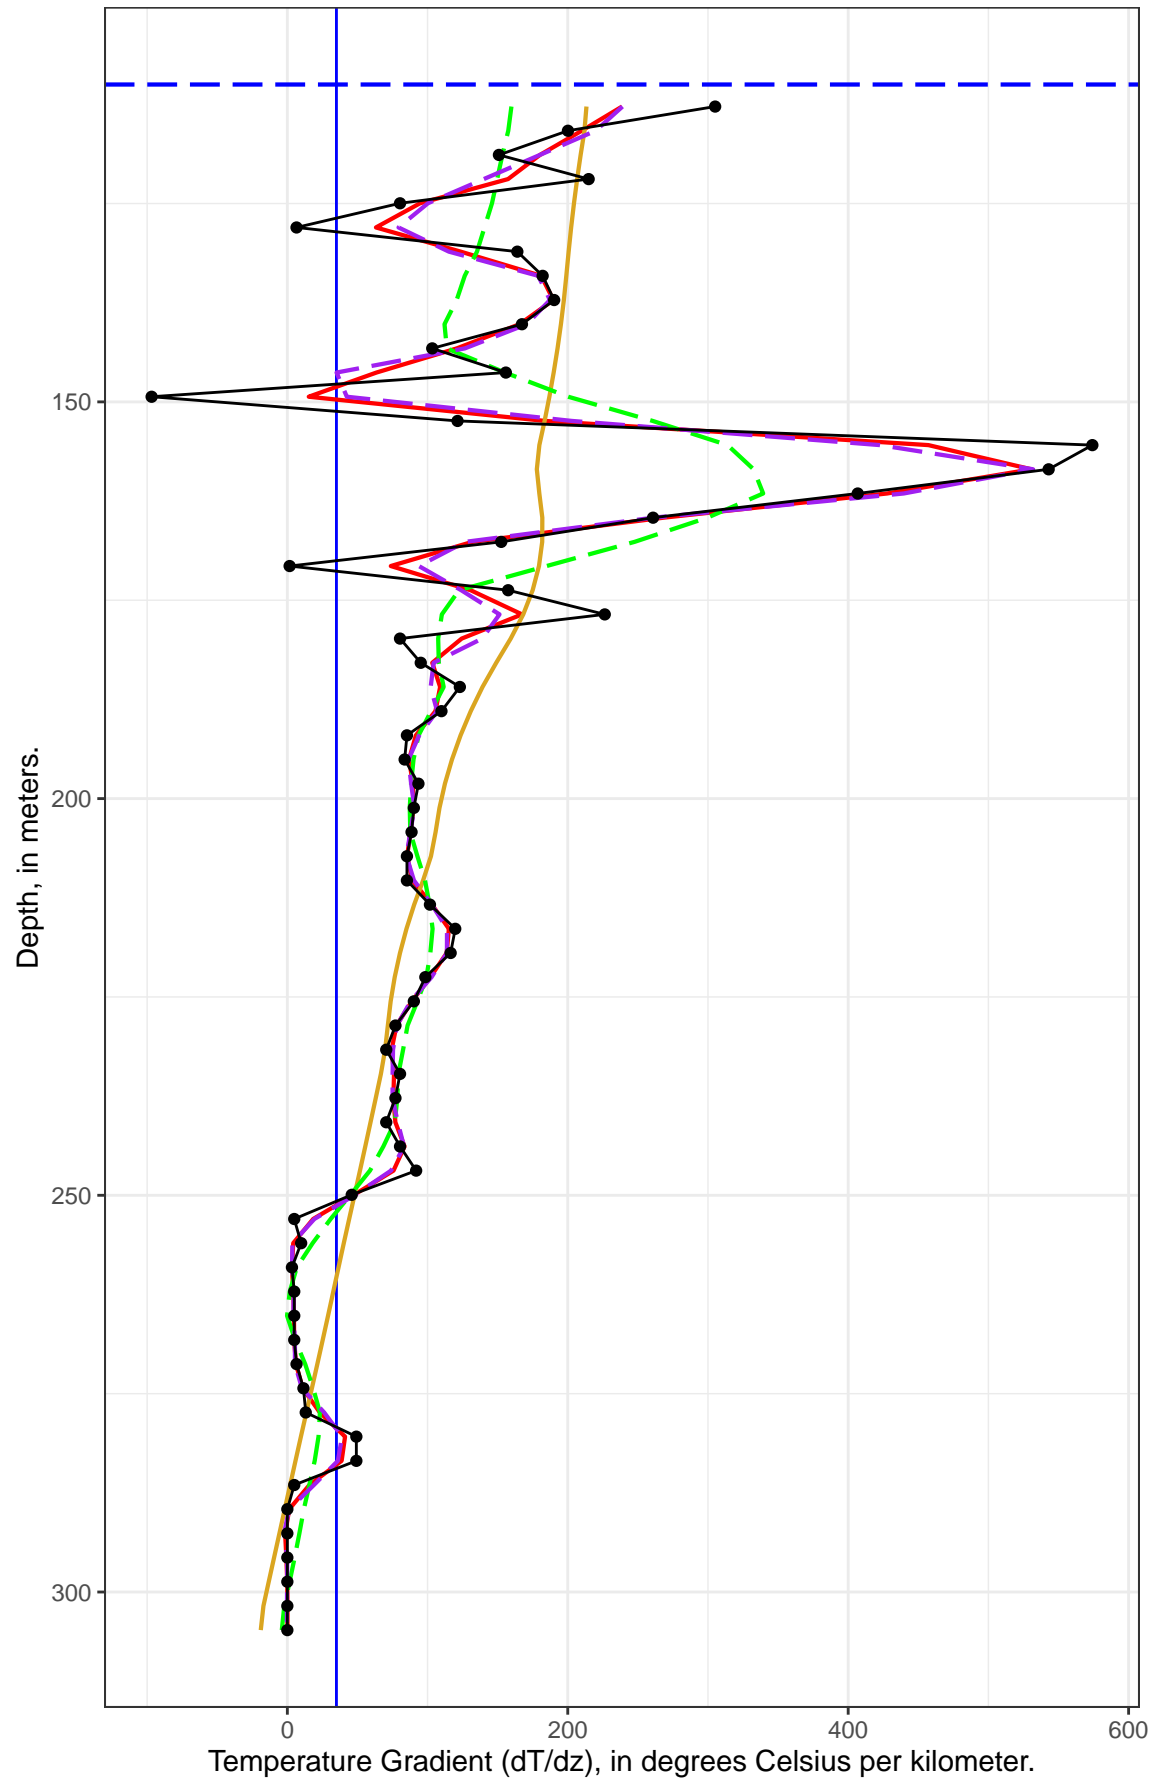

ID: 84 [H-2-80-1464B\_KILBOURNE\_HOLE] Second Derivative

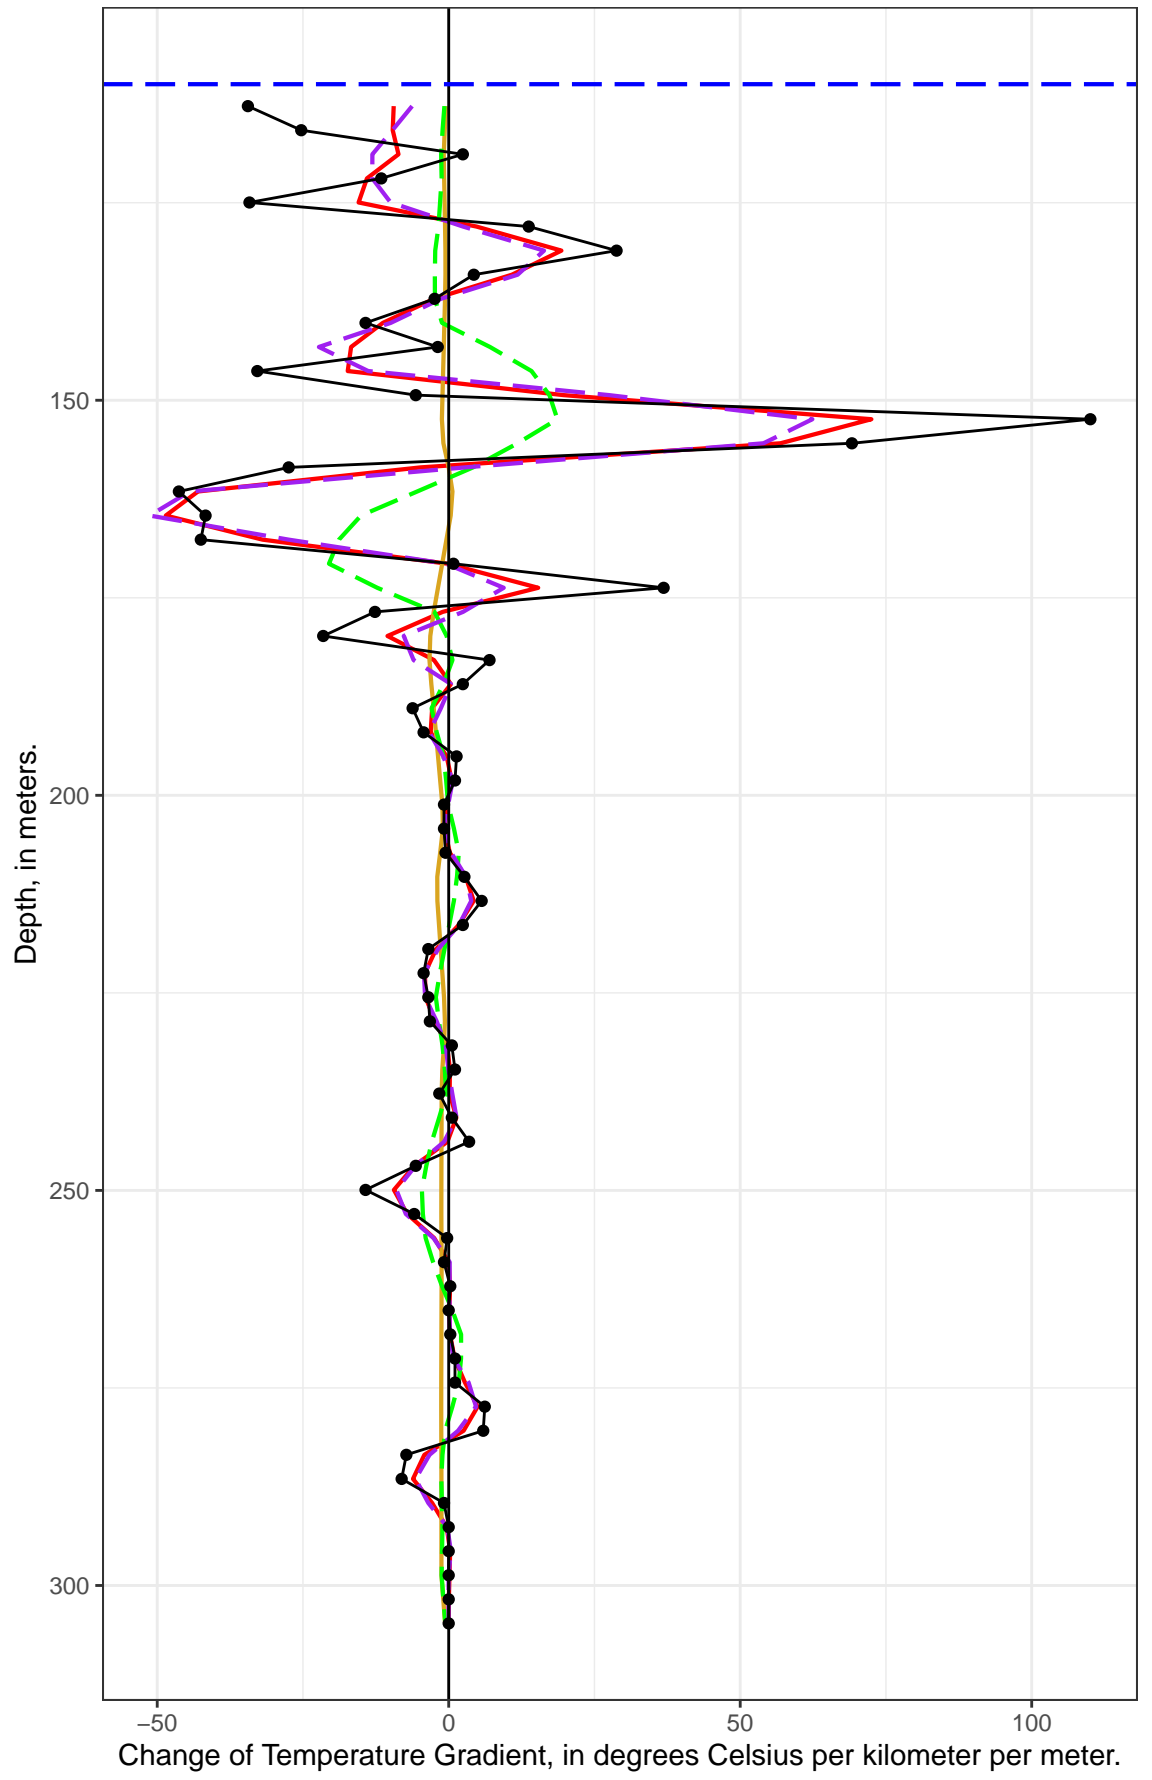

• Data • LOESS (AICC) • LOESS (constant) • LOESS (GCV) • Spline

• Data • LOESS (AICC) • LOESS (constant) • LOESS (GCV) • Spline

• Data • LOESS (AICC) • LOESS (constant) • LOESS (GCV) • Spline

ID: 85 [H-2-80-1465\_KILBOURNE\_HOLE] Smoothed Profile

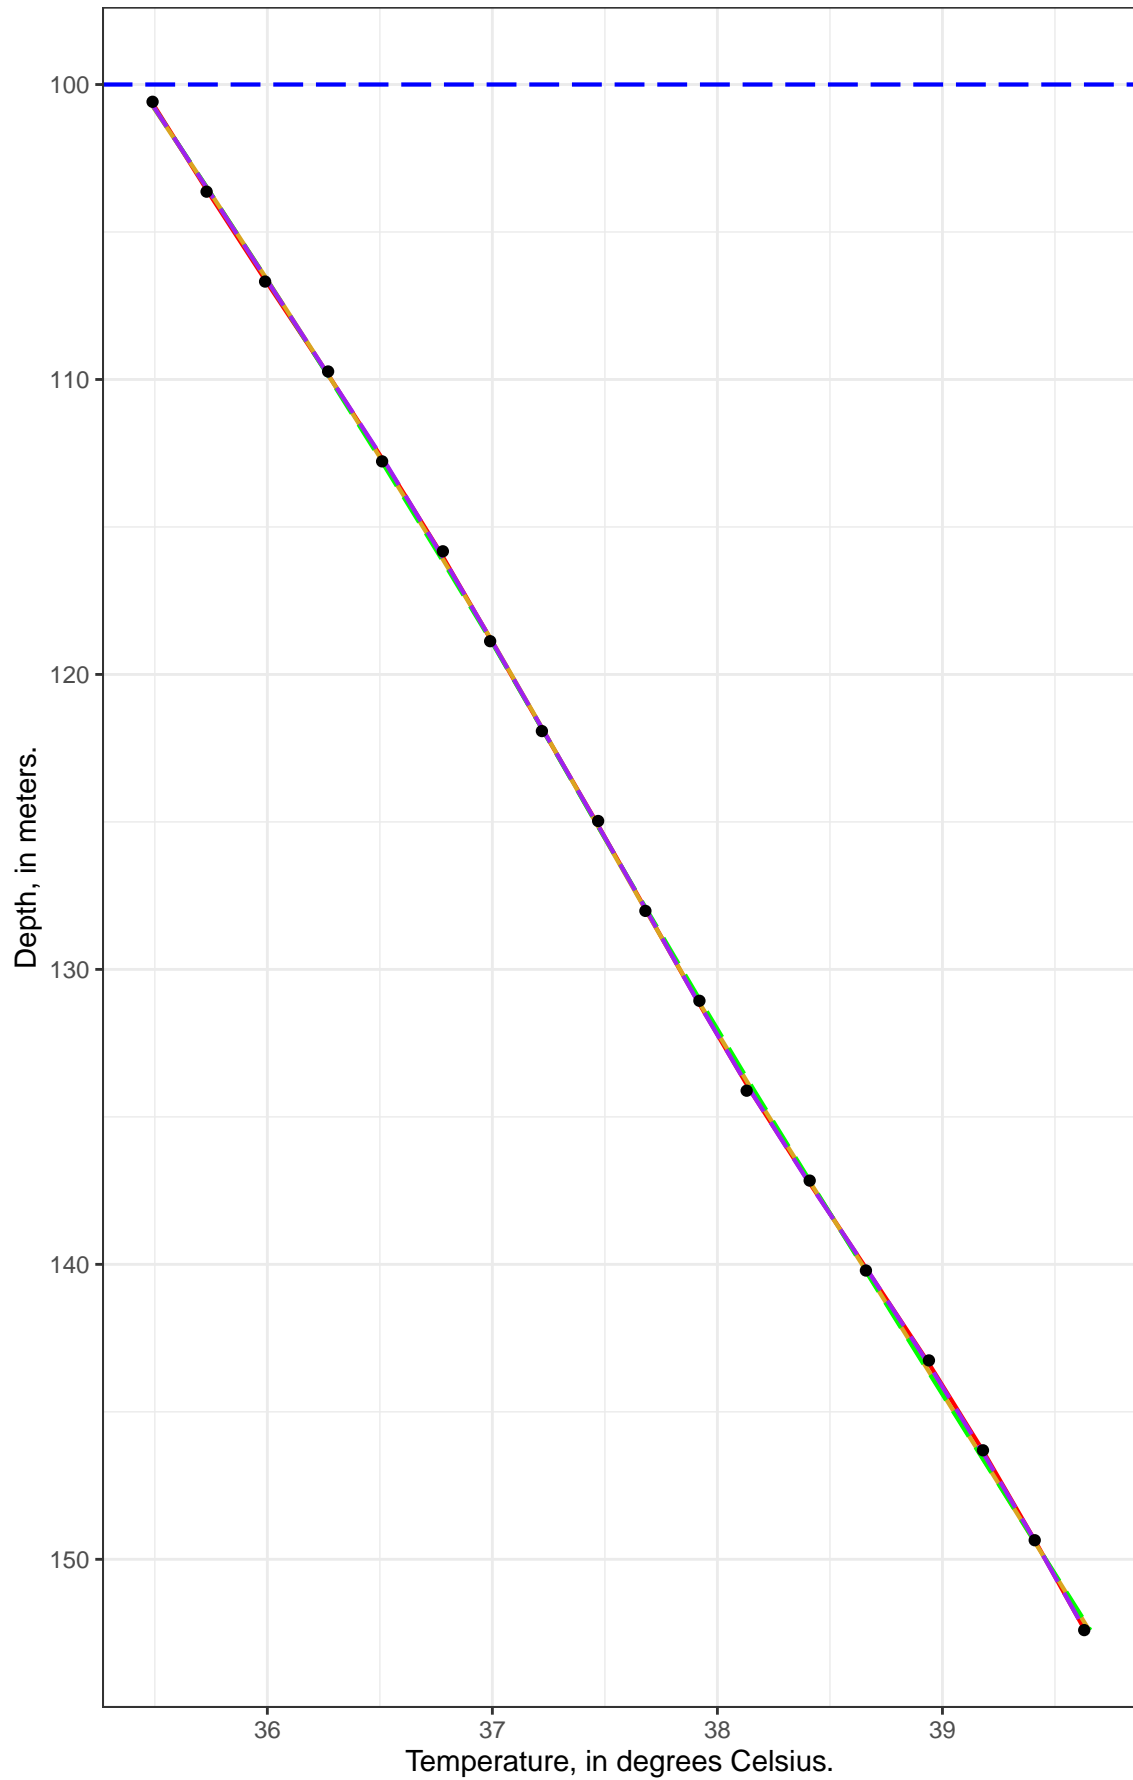

ID: 85 [H-2-80-1465\_KILBOURNE\_HOLE] First Derivative

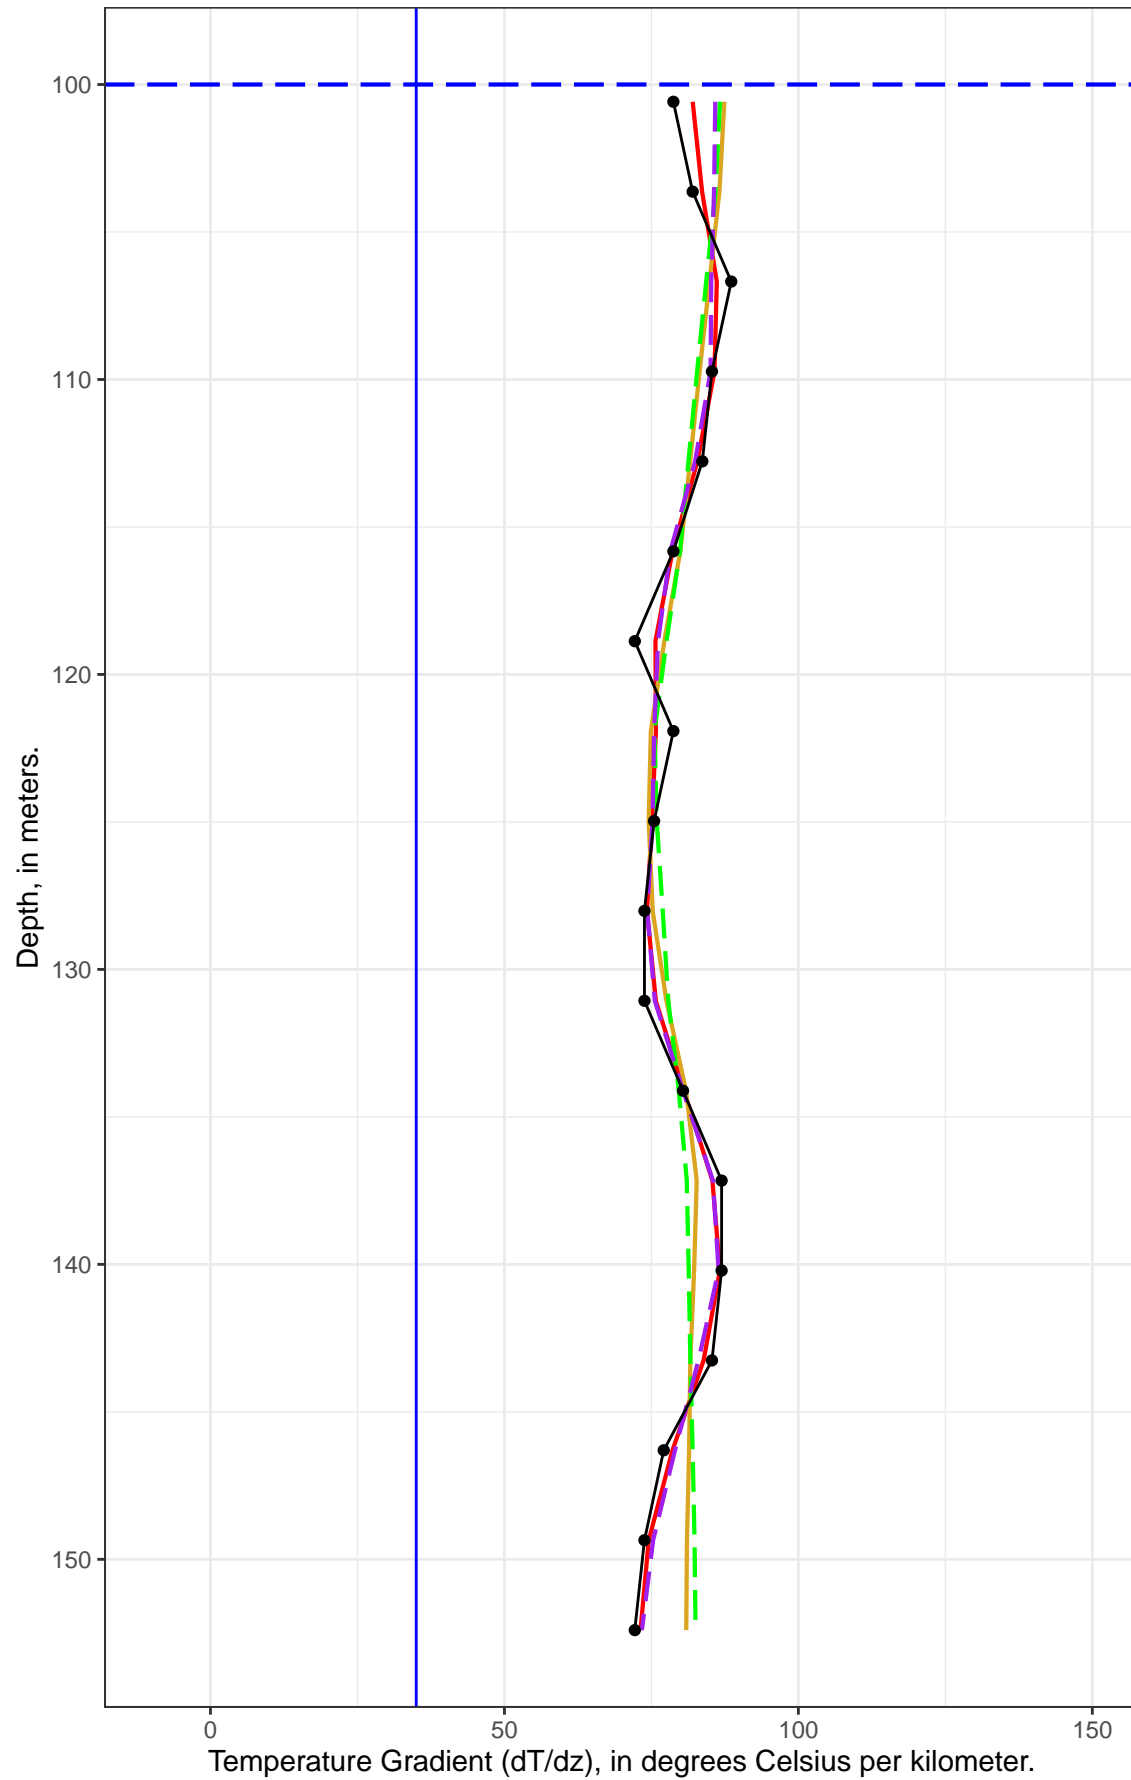

ID: 85 [H-2-80-1465\_KILBOURNE\_HOLE] Second Derivative

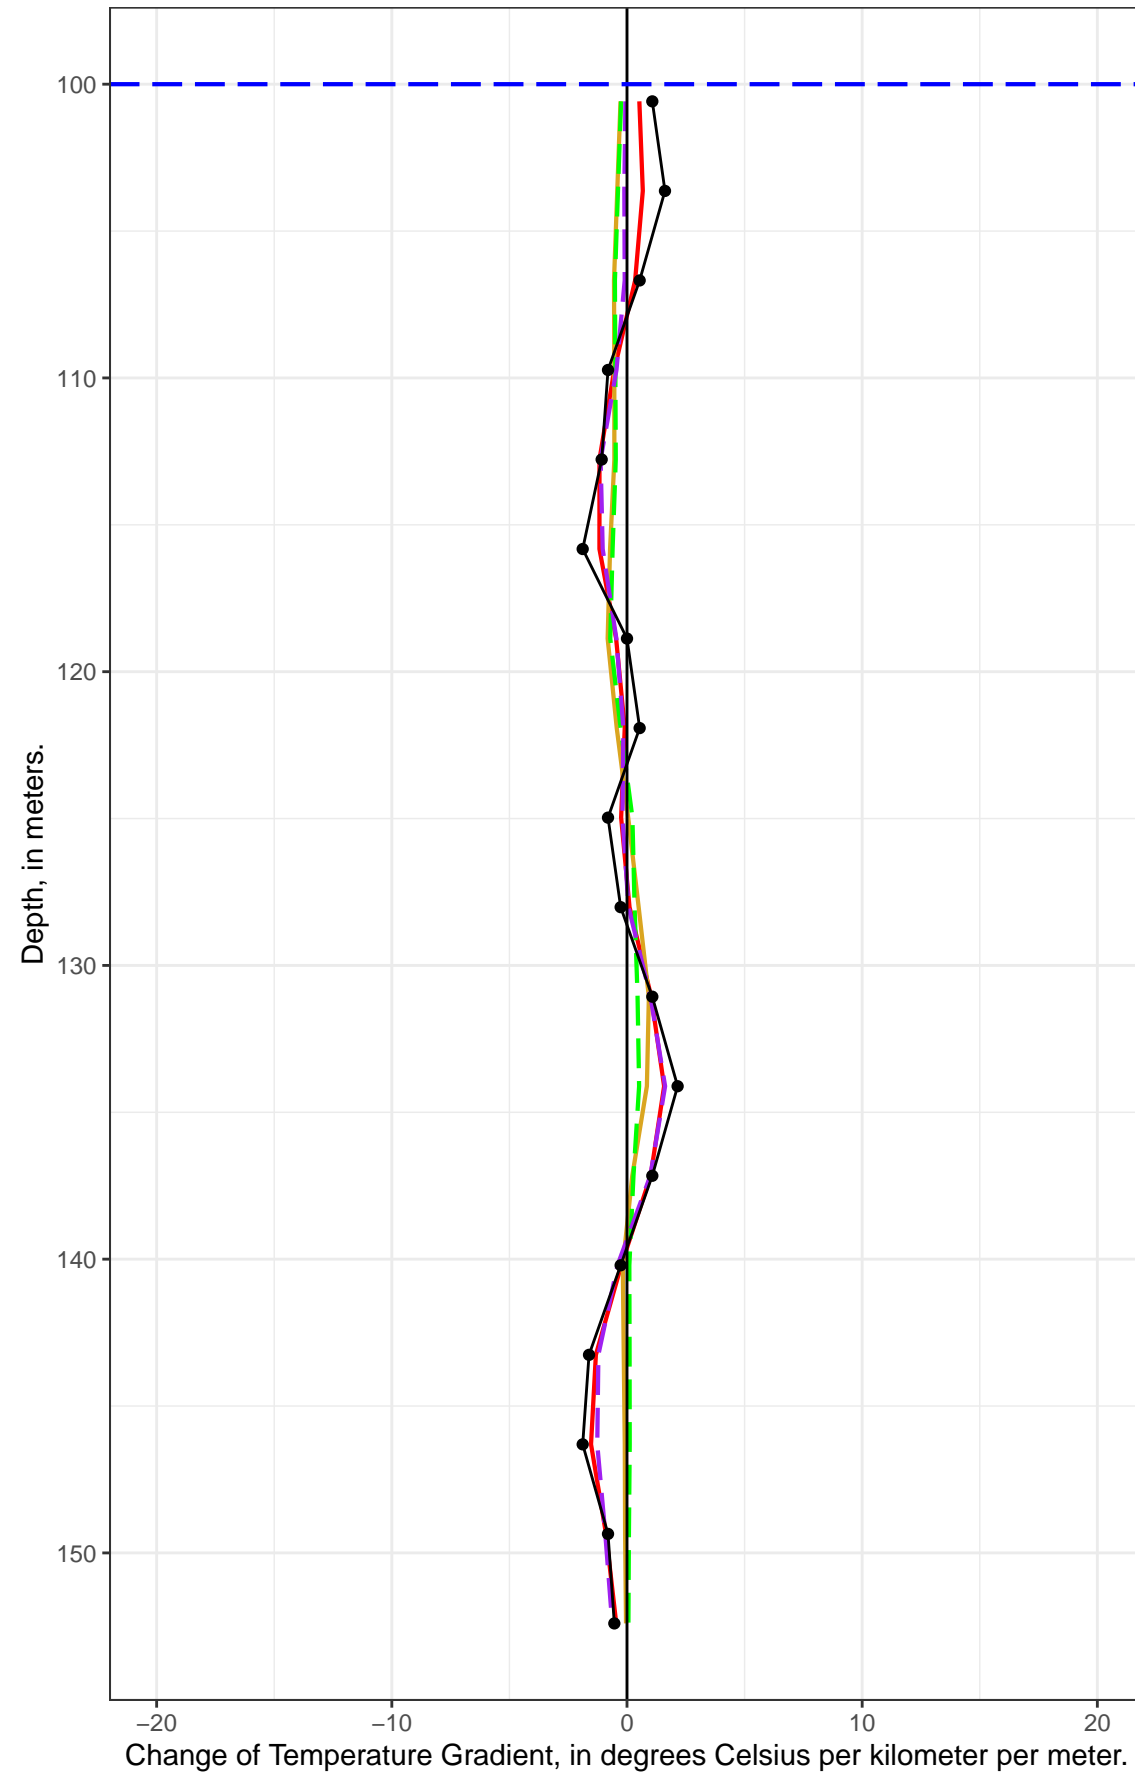

• Data — LOESS (AICC) — LOESS (constant) — LOESS (GCV) — Spline

• Data — LOESS (AICC) — LOESS (constant) — LOESS (GCV) — Spline

• Data — LOESS (AICC) — LOESS (constant) — LOESS (GCV) — Spline

ID: 86 [H-2-80-1466\_KILBOURNE\_HOLE] Smoothed Profile

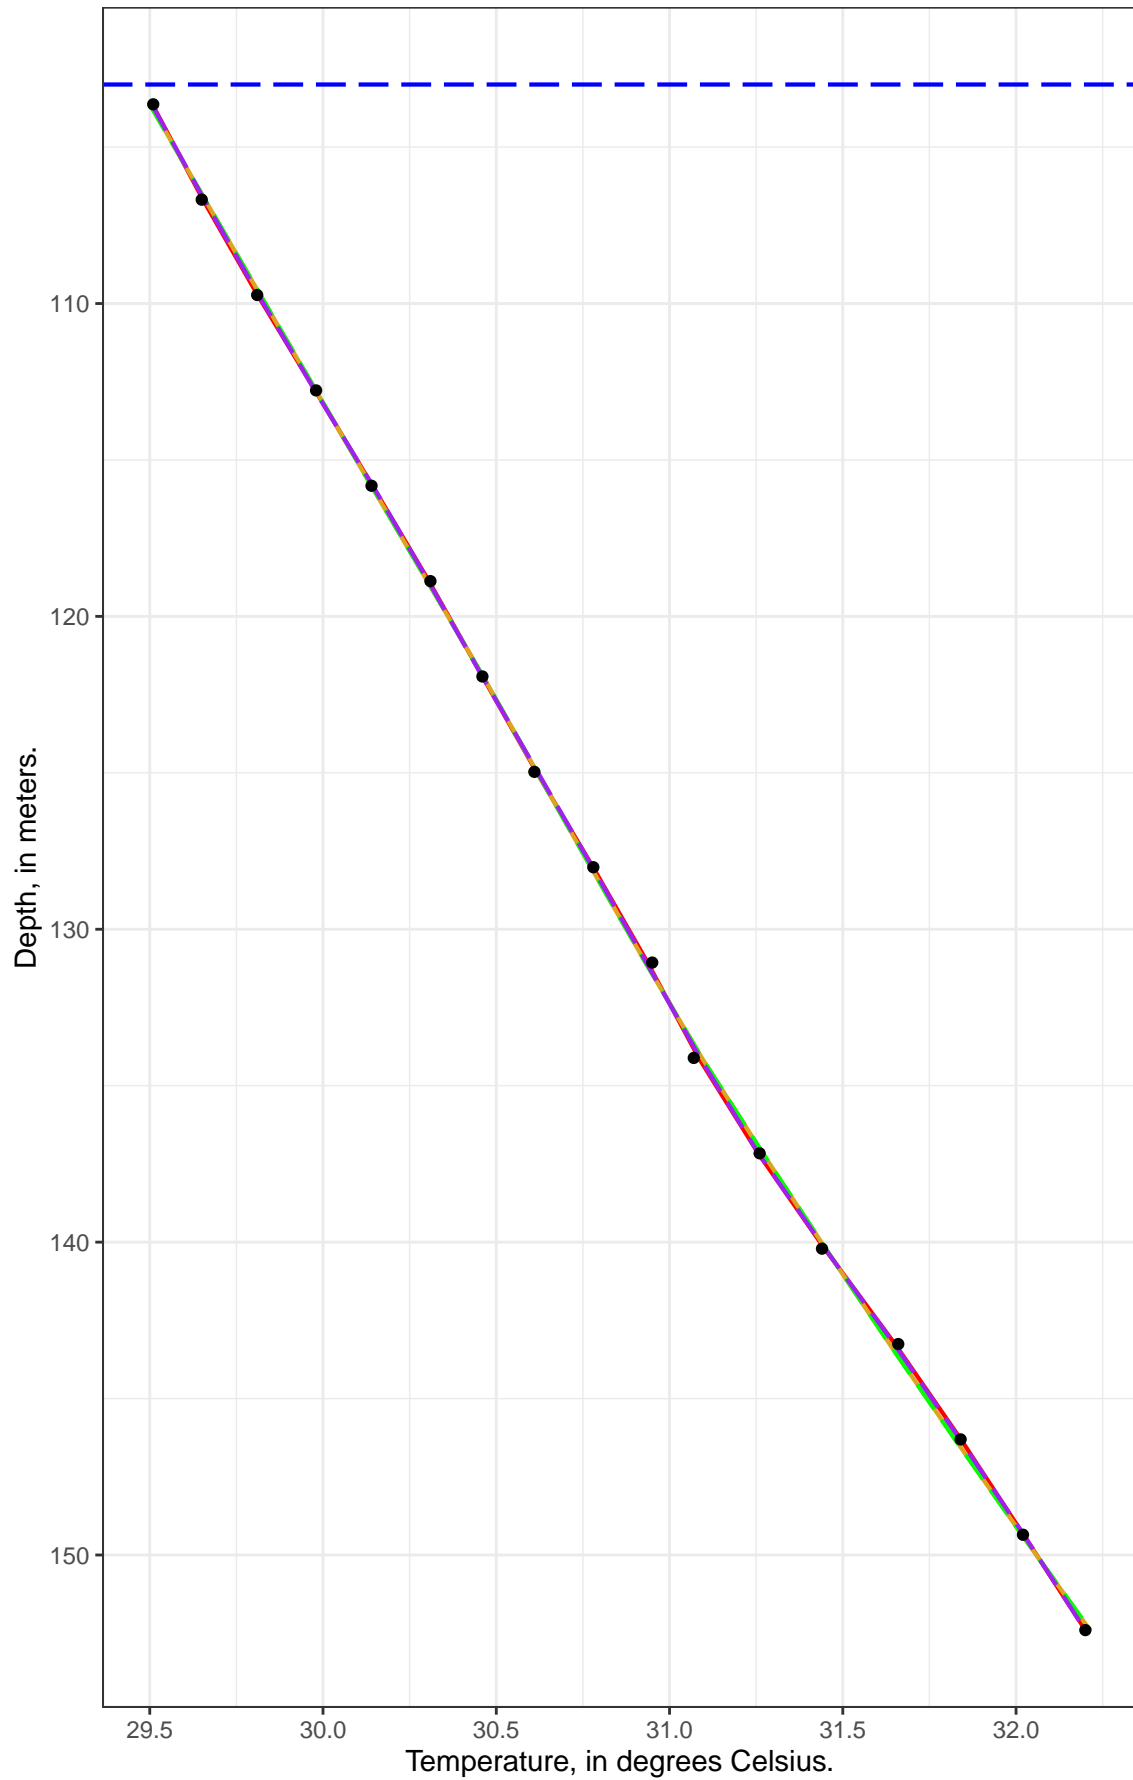

ID: 86 [H-2-80-1466\_KILBOURNE\_HOLE] First Derivative

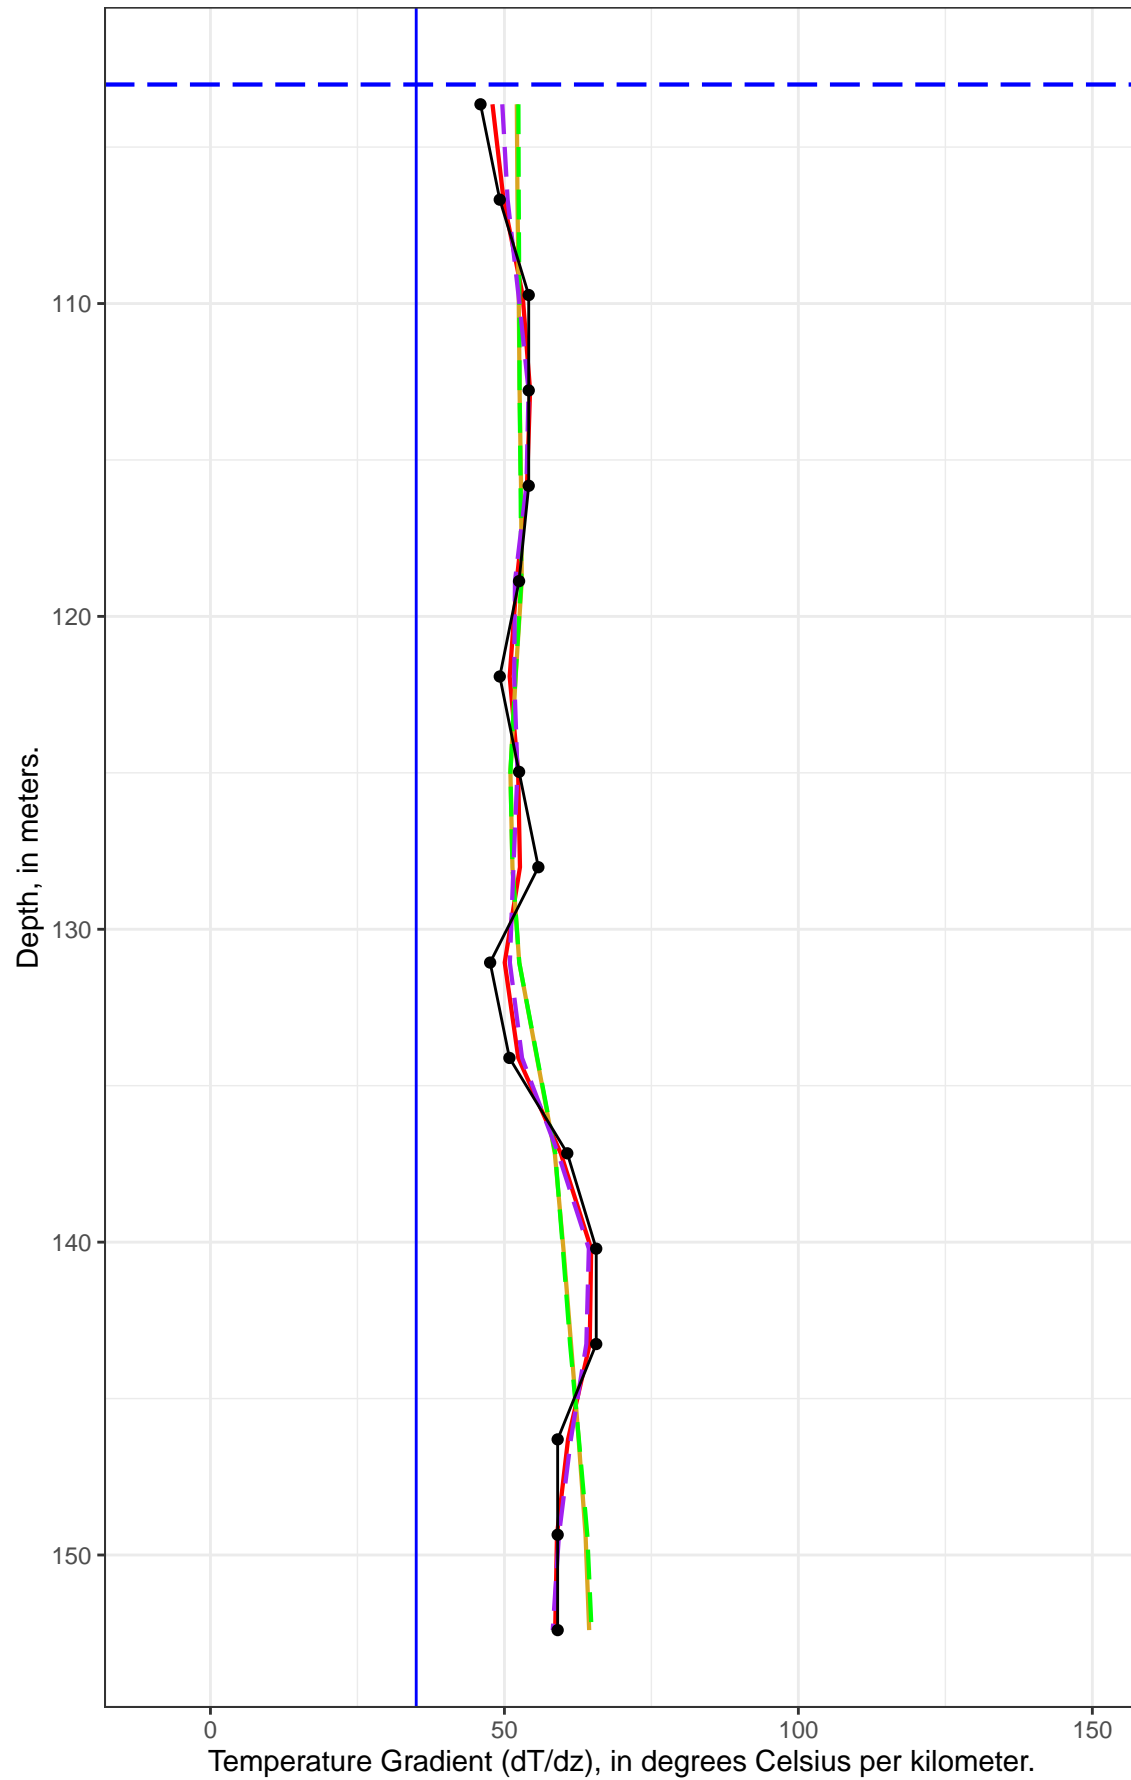

ID: 86 [H-2-80-1466\_KILBOURNE\_HOLE] Second Derivative

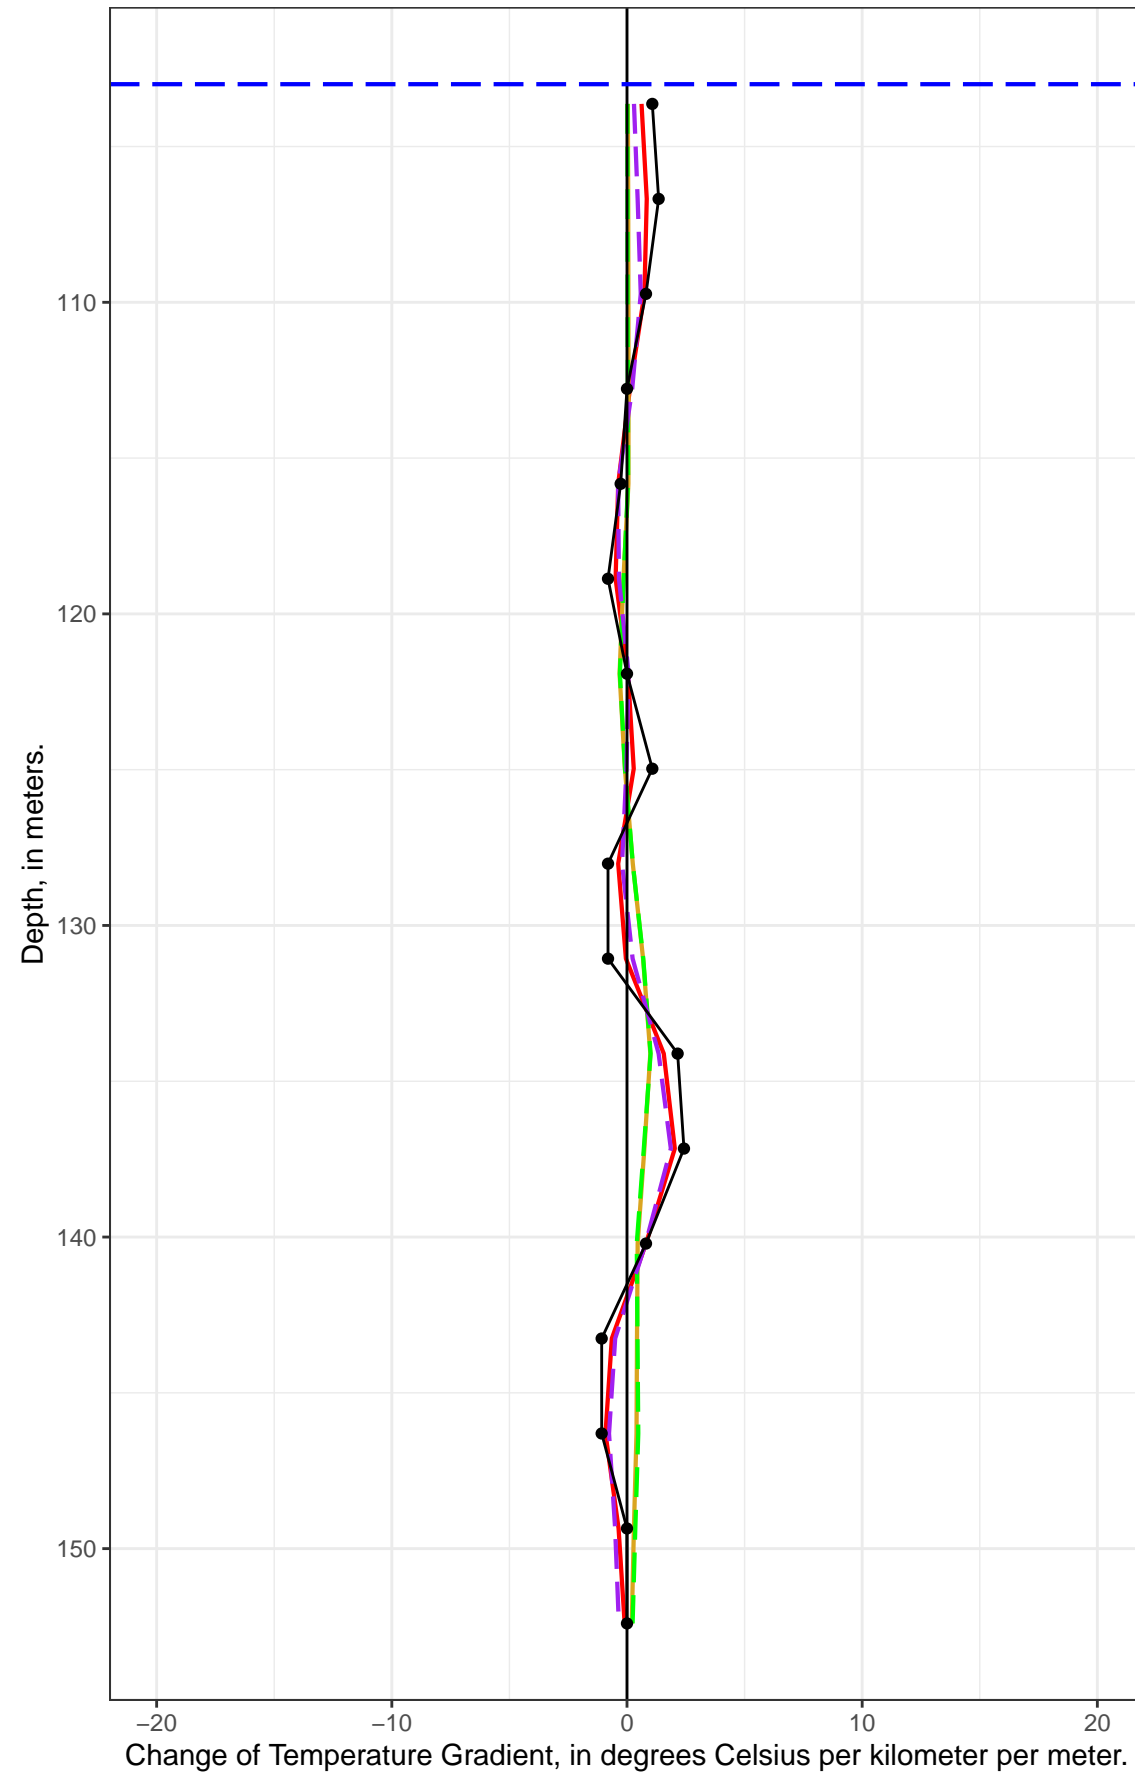

• Data — LOESS (AICC) — LOESS (constant) — LOESS (GCV) — Spline

• Data — LOESS (AICC) — LOESS (constant) — LOESS (GCV) — Spline

• Data — LOESS (AICC) — LOESS (constant) — LOESS (GCV) — Spline

ID: 88 [H-2-80-1473\_KILBOURNE\_HOLE] Smoothed Profile

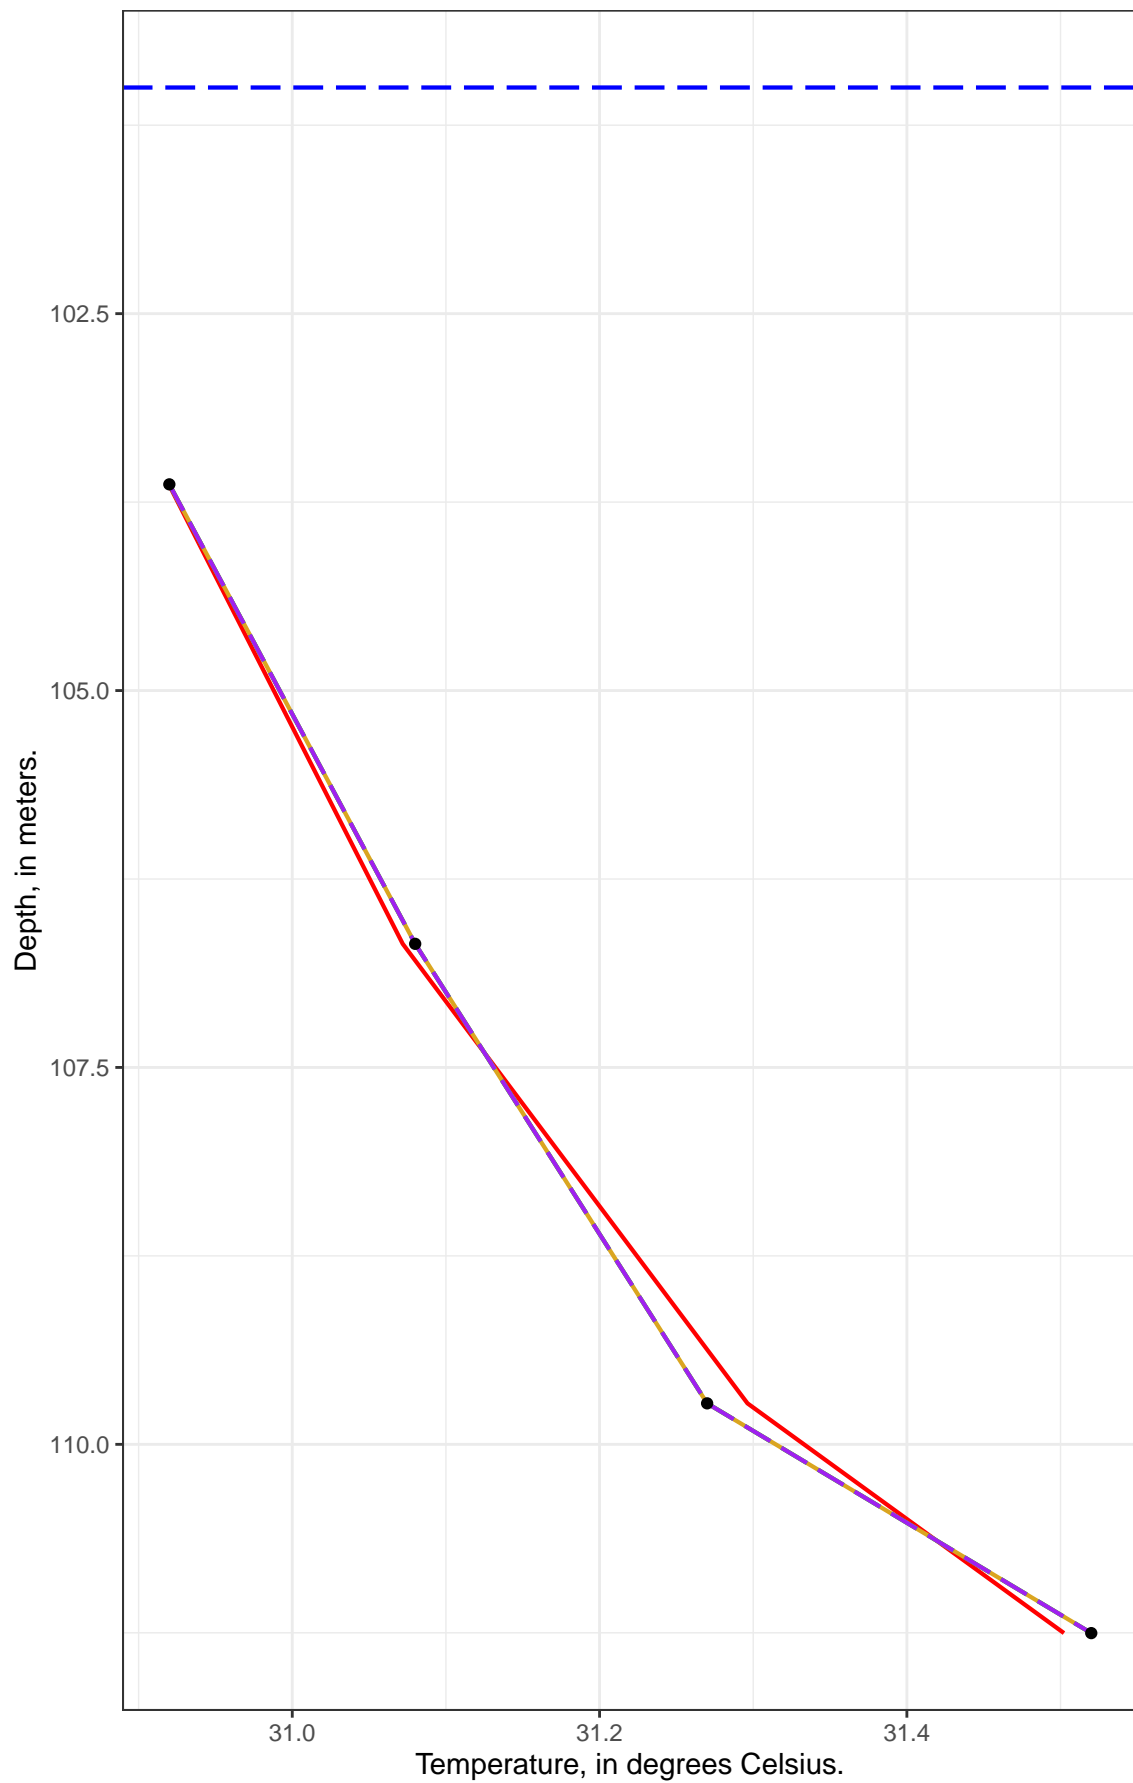

ID: 88 [H-2-80-1473\_KILBOURNE\_HOLE] First Derivative

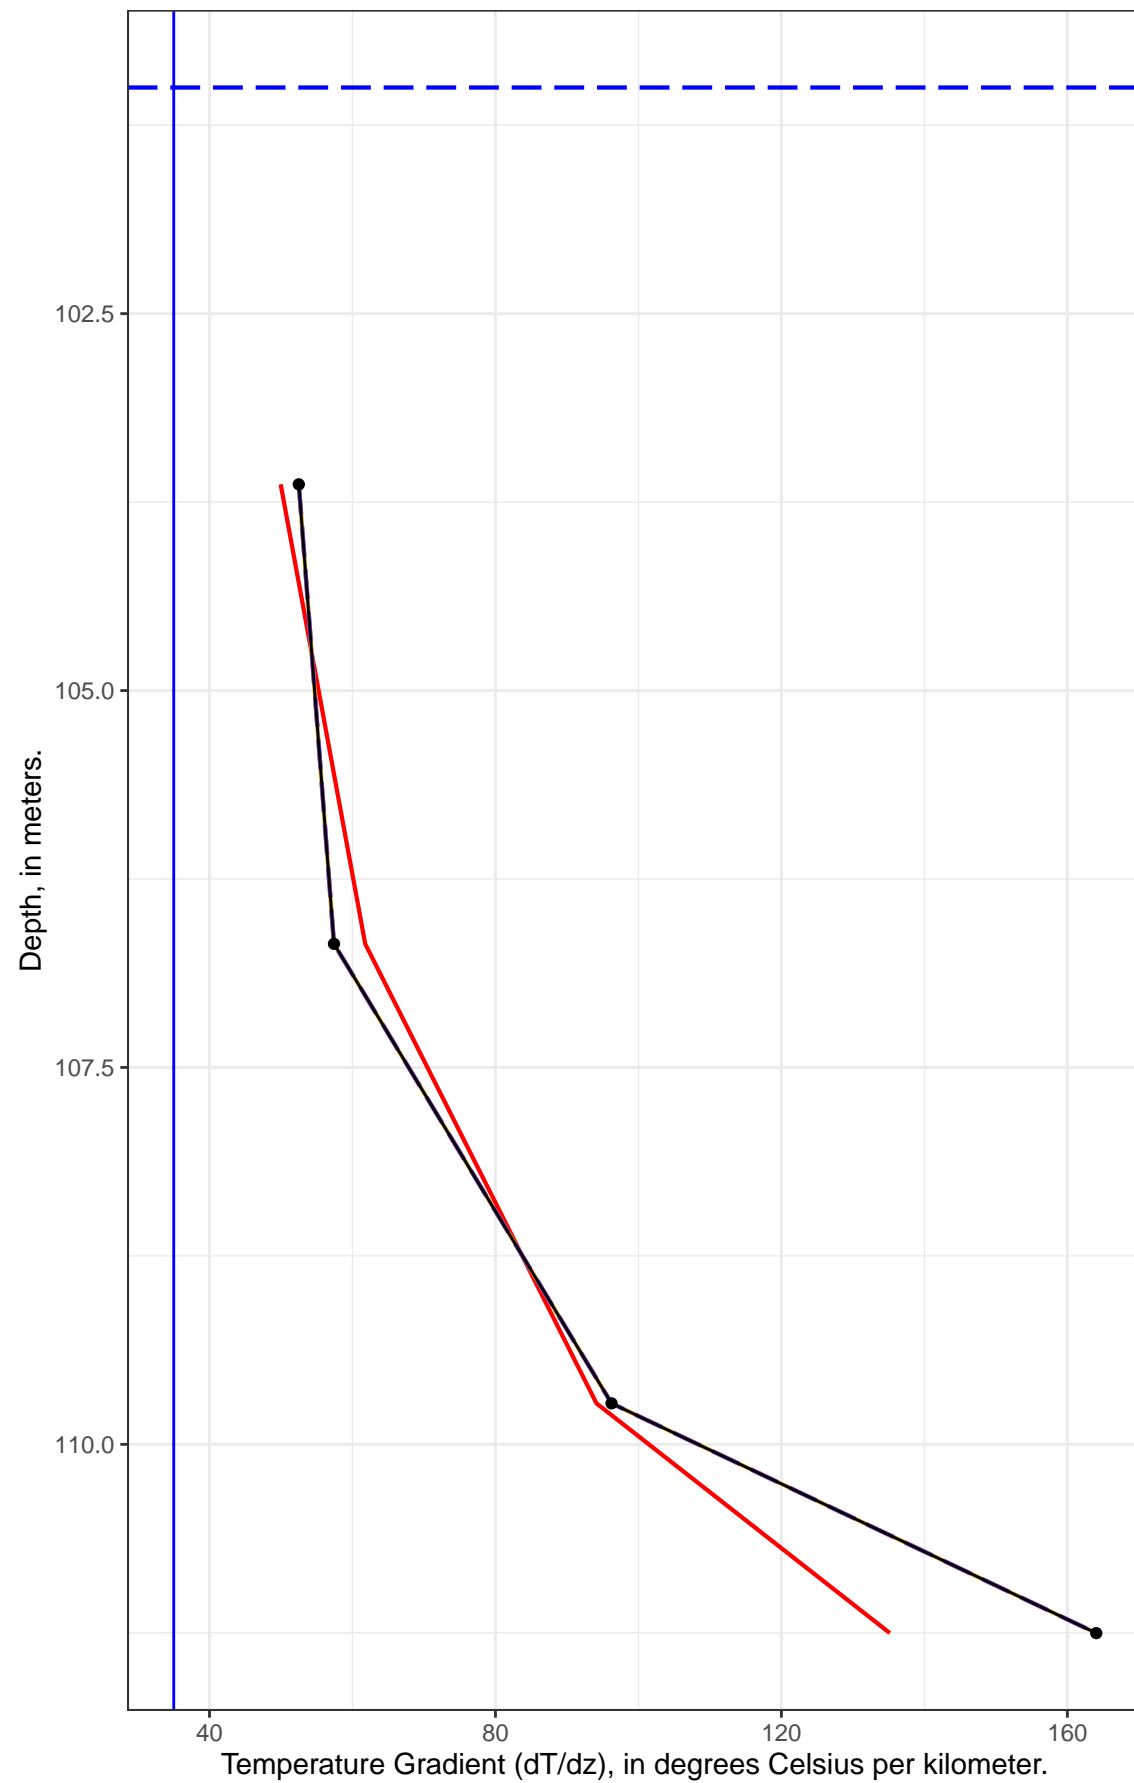

ID: 88 [H-2-80-1473\_KILBOURNE\_HOLE] Second Derivative

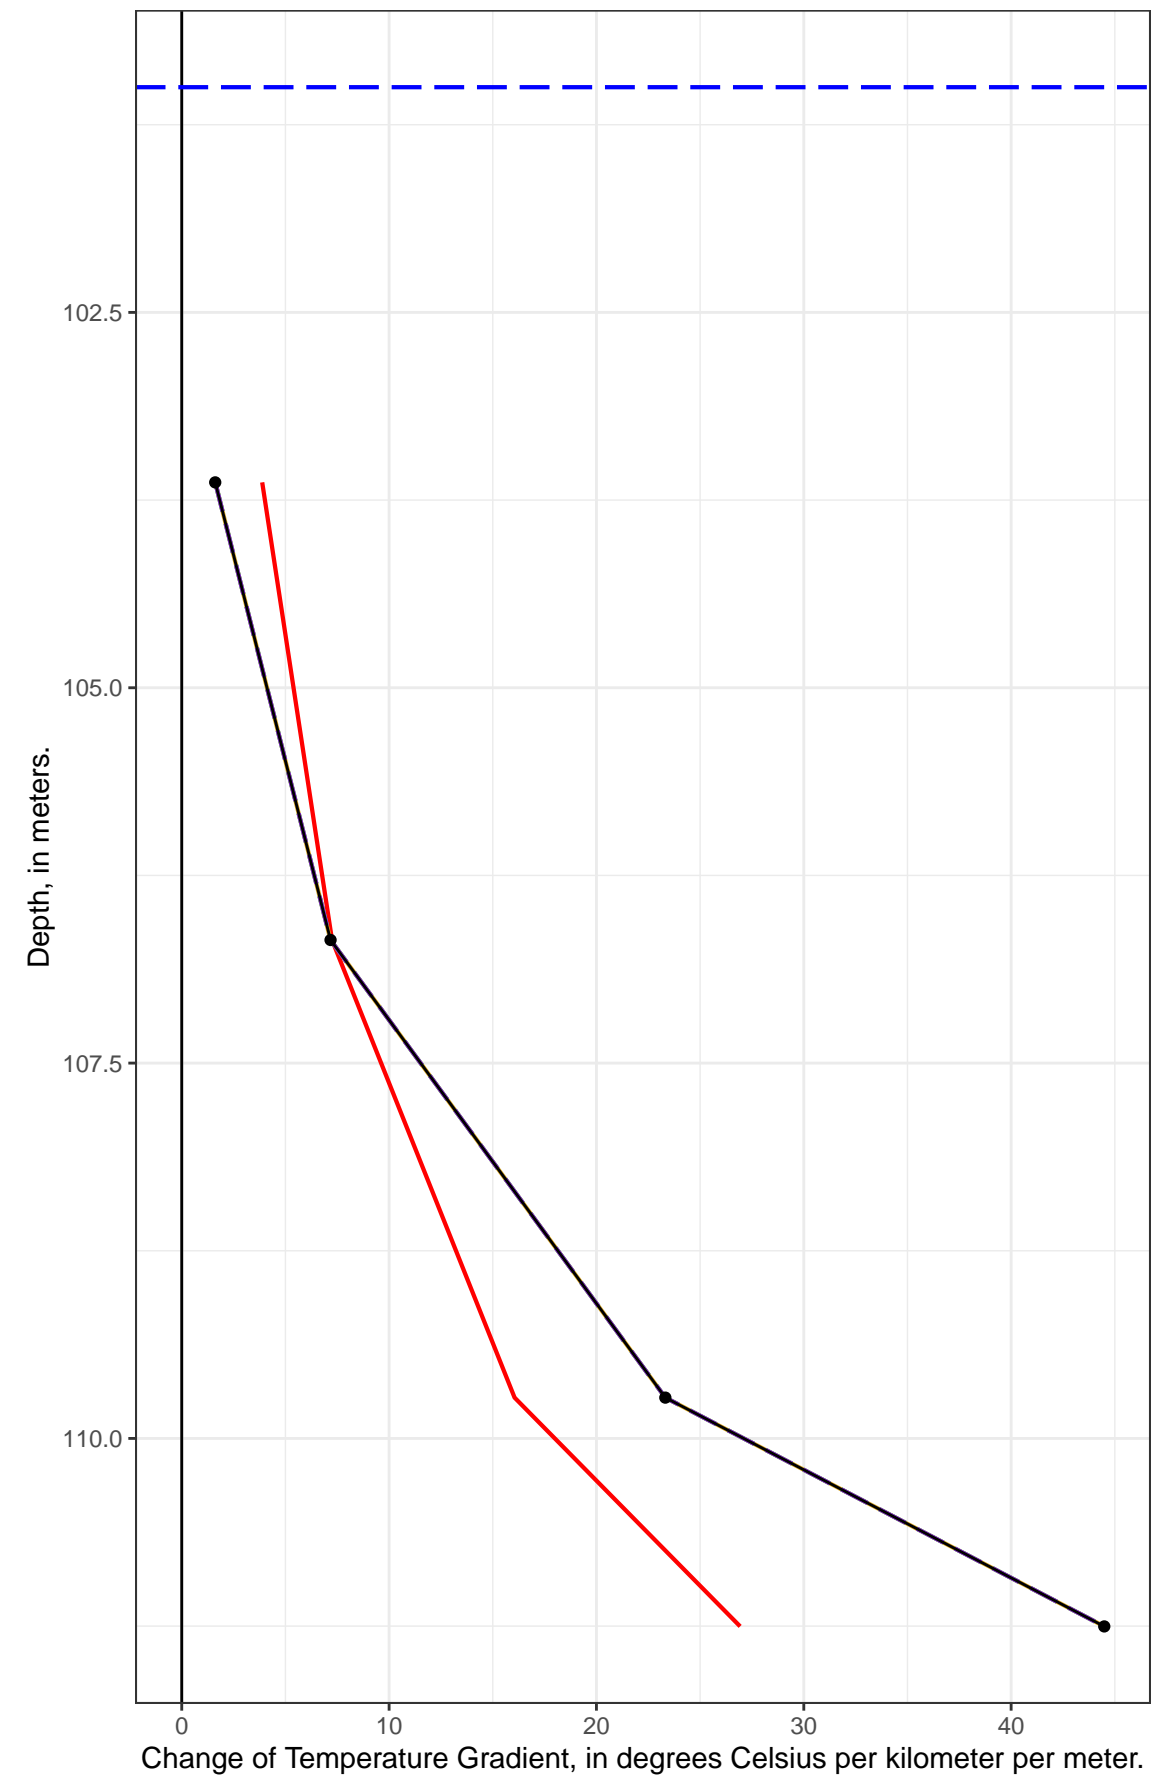

• Data • LOESS (AICC) • LOESS (constant) • LOESS (GCV) • Spline

• Data • LOESS (AICC) • LOESS (constant) • LOESS (GCV) • Spline

• Data • LOESS (AICC) • LOESS (constant) • LOESS (GCV) • Spline

ID: 89 [H-2-80-1478\_KILBOURNE\_HOLE] Smoothed Profile

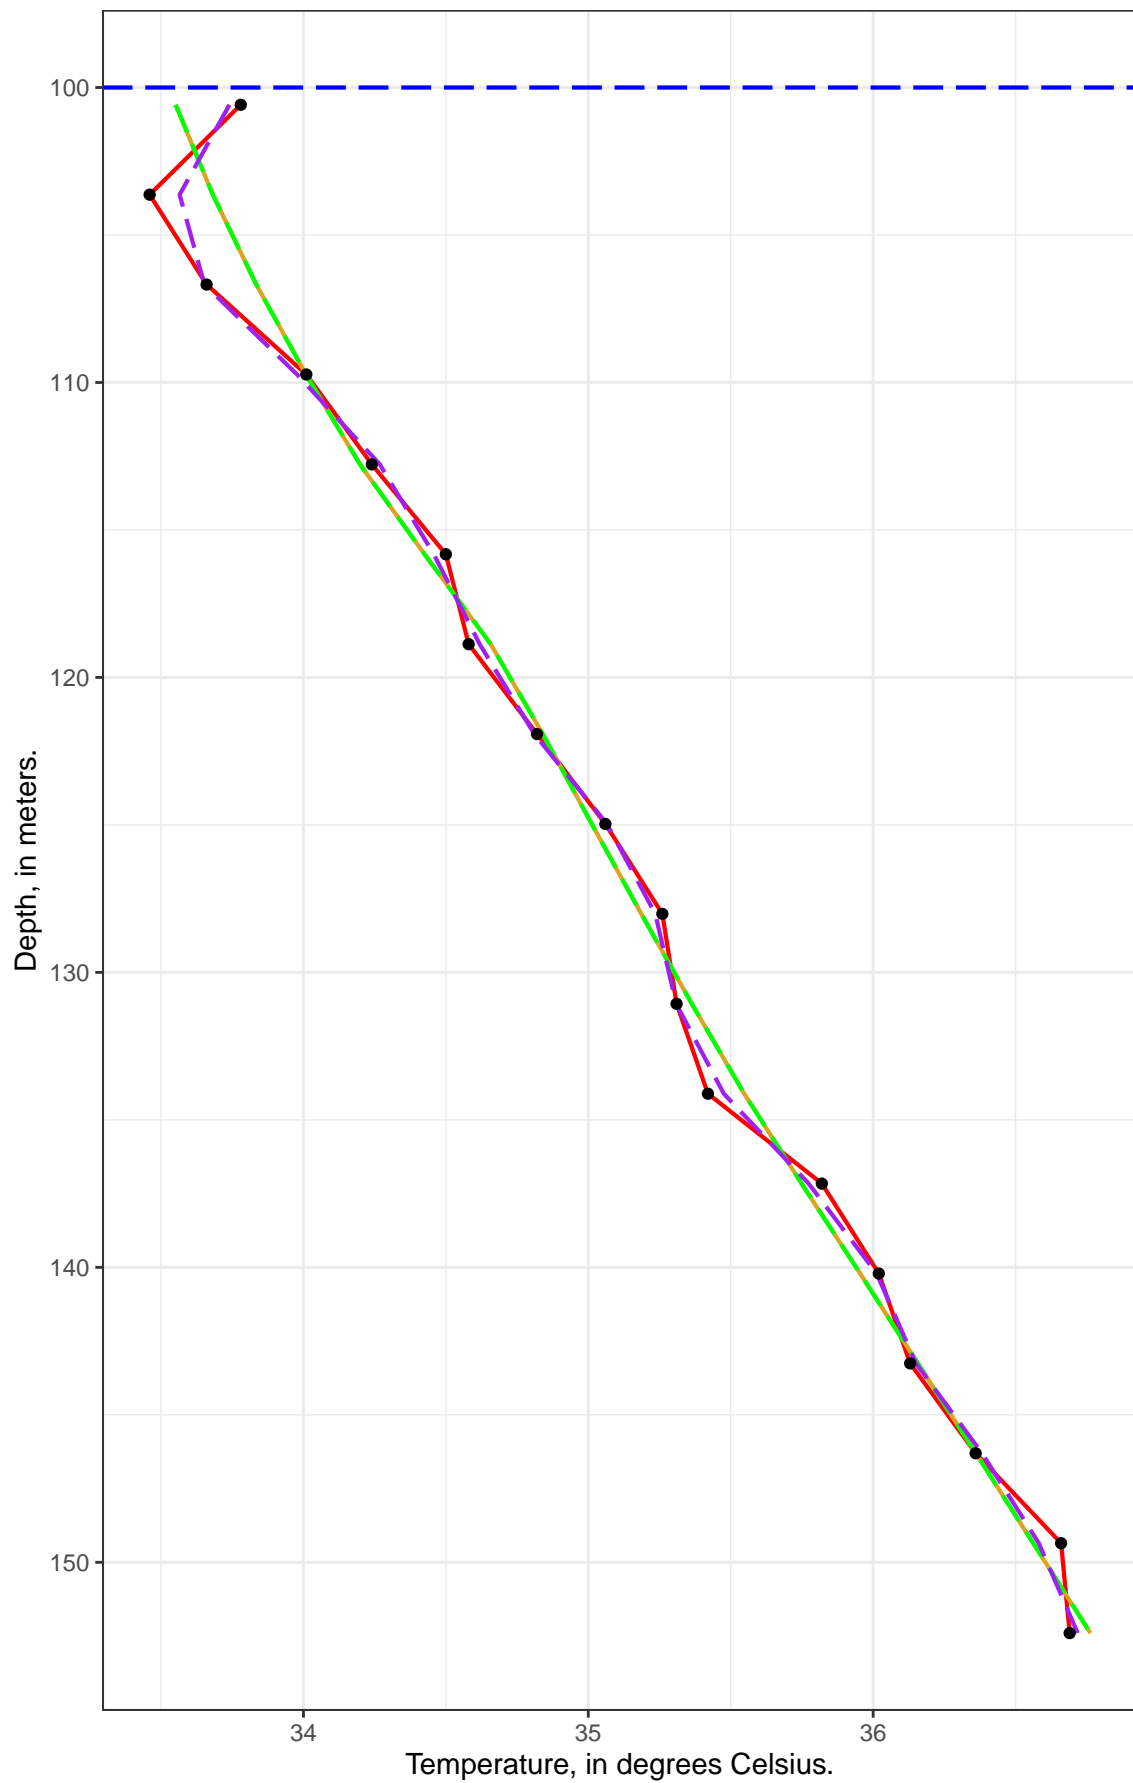

• Data — LOESS (AICC) — LOESS (constant) — LOESS (GCV) — Spline

ID: 89 [H-2-80-1478\_KILBOURNE\_HOLE] First Derivative

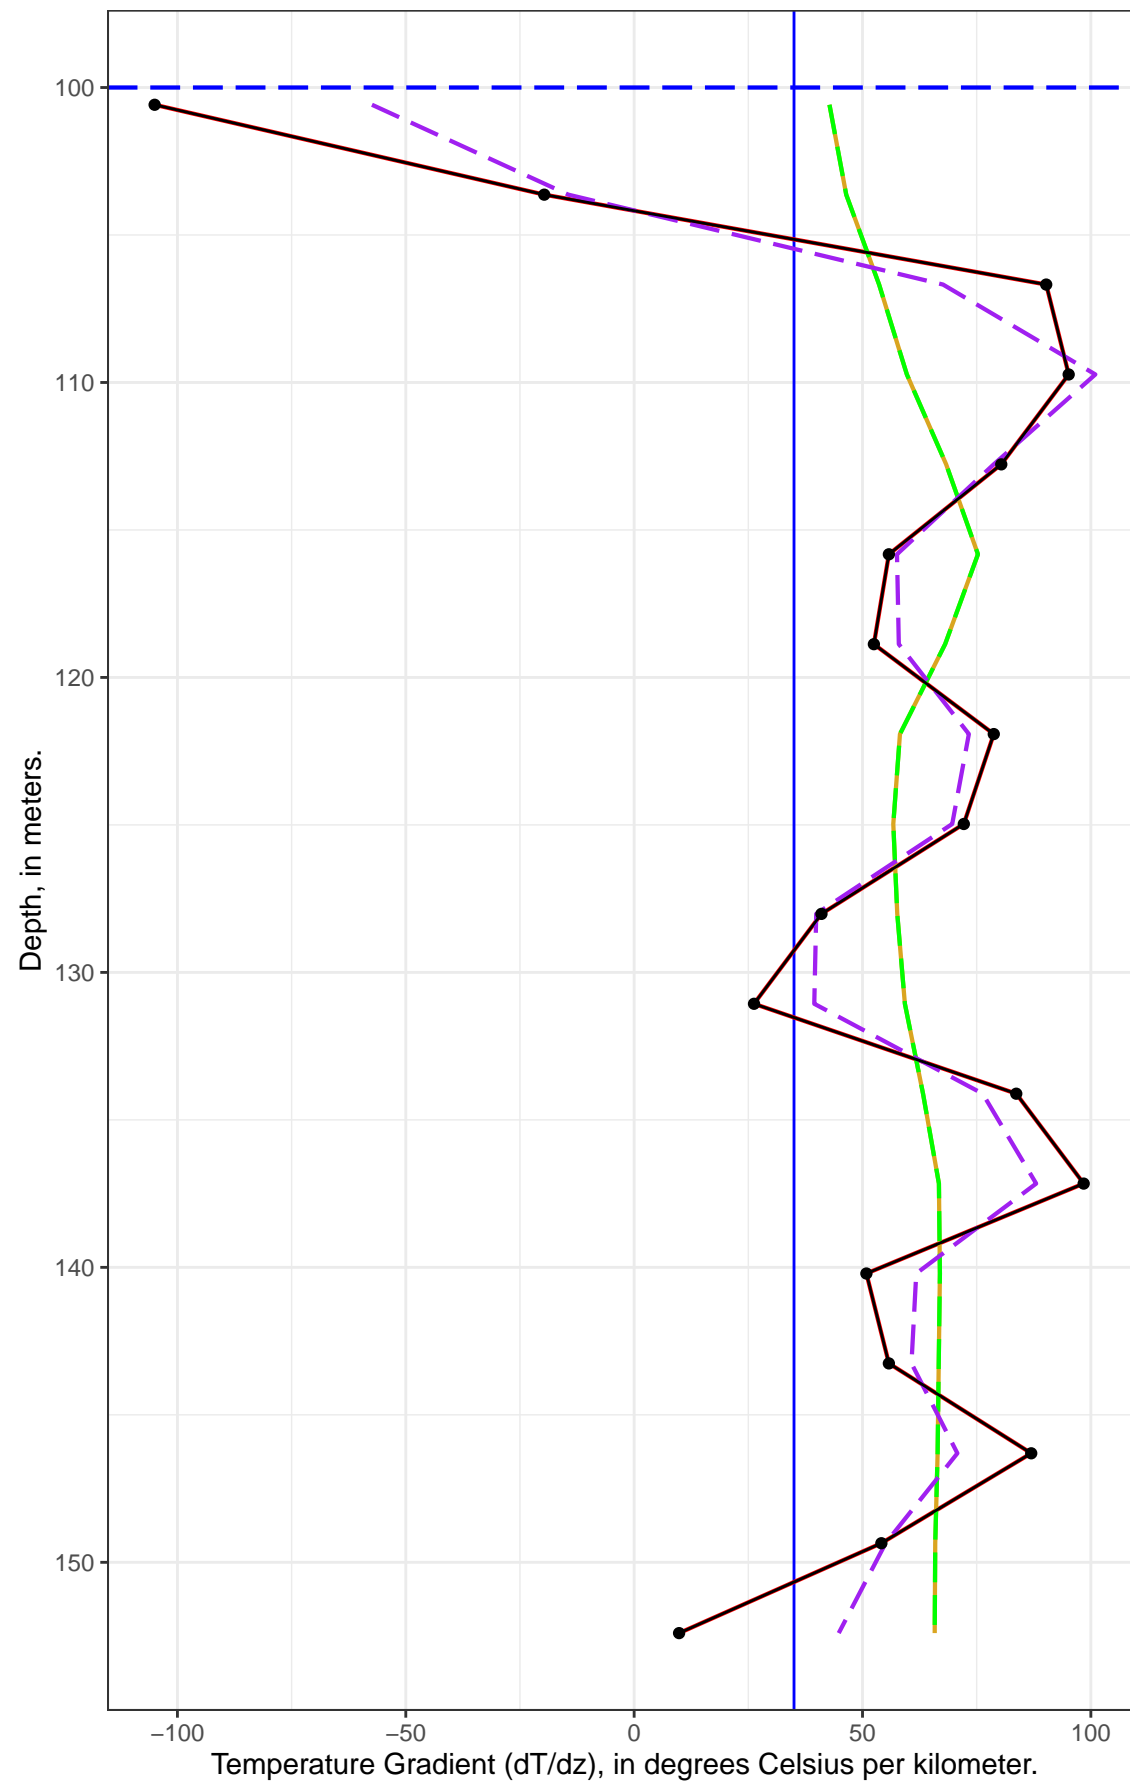

• Data — LOESS (AICC) — LOESS (constant) — LOESS (GCV) — Spline

ID: 89 [H-2-80-1478\_KILBOURNE\_HOLE] Second Derivative

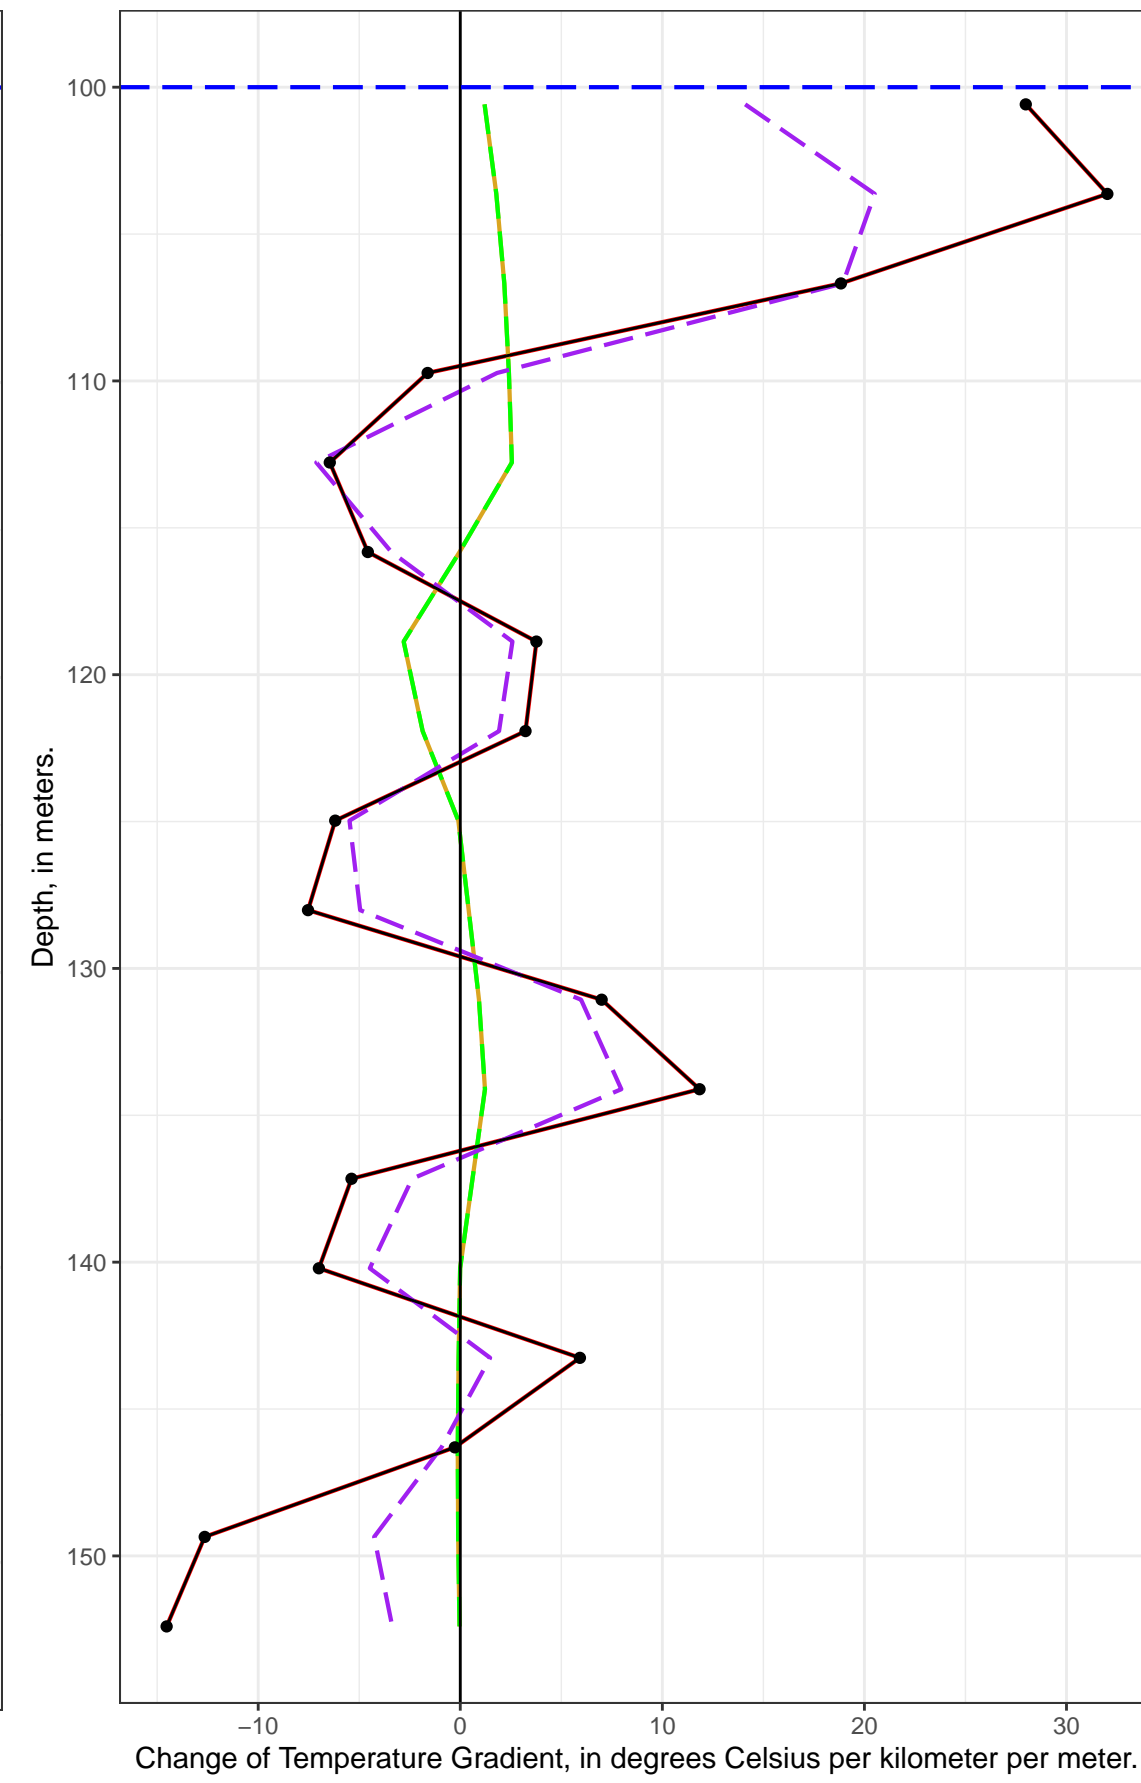

• Data — LOESS (AICC) — LOESS (constant) — LOESS (GCV) — Spline

ID: 90 [H-2-80-1479\_KILBOURNE\_HOLE] Smoothed Profile

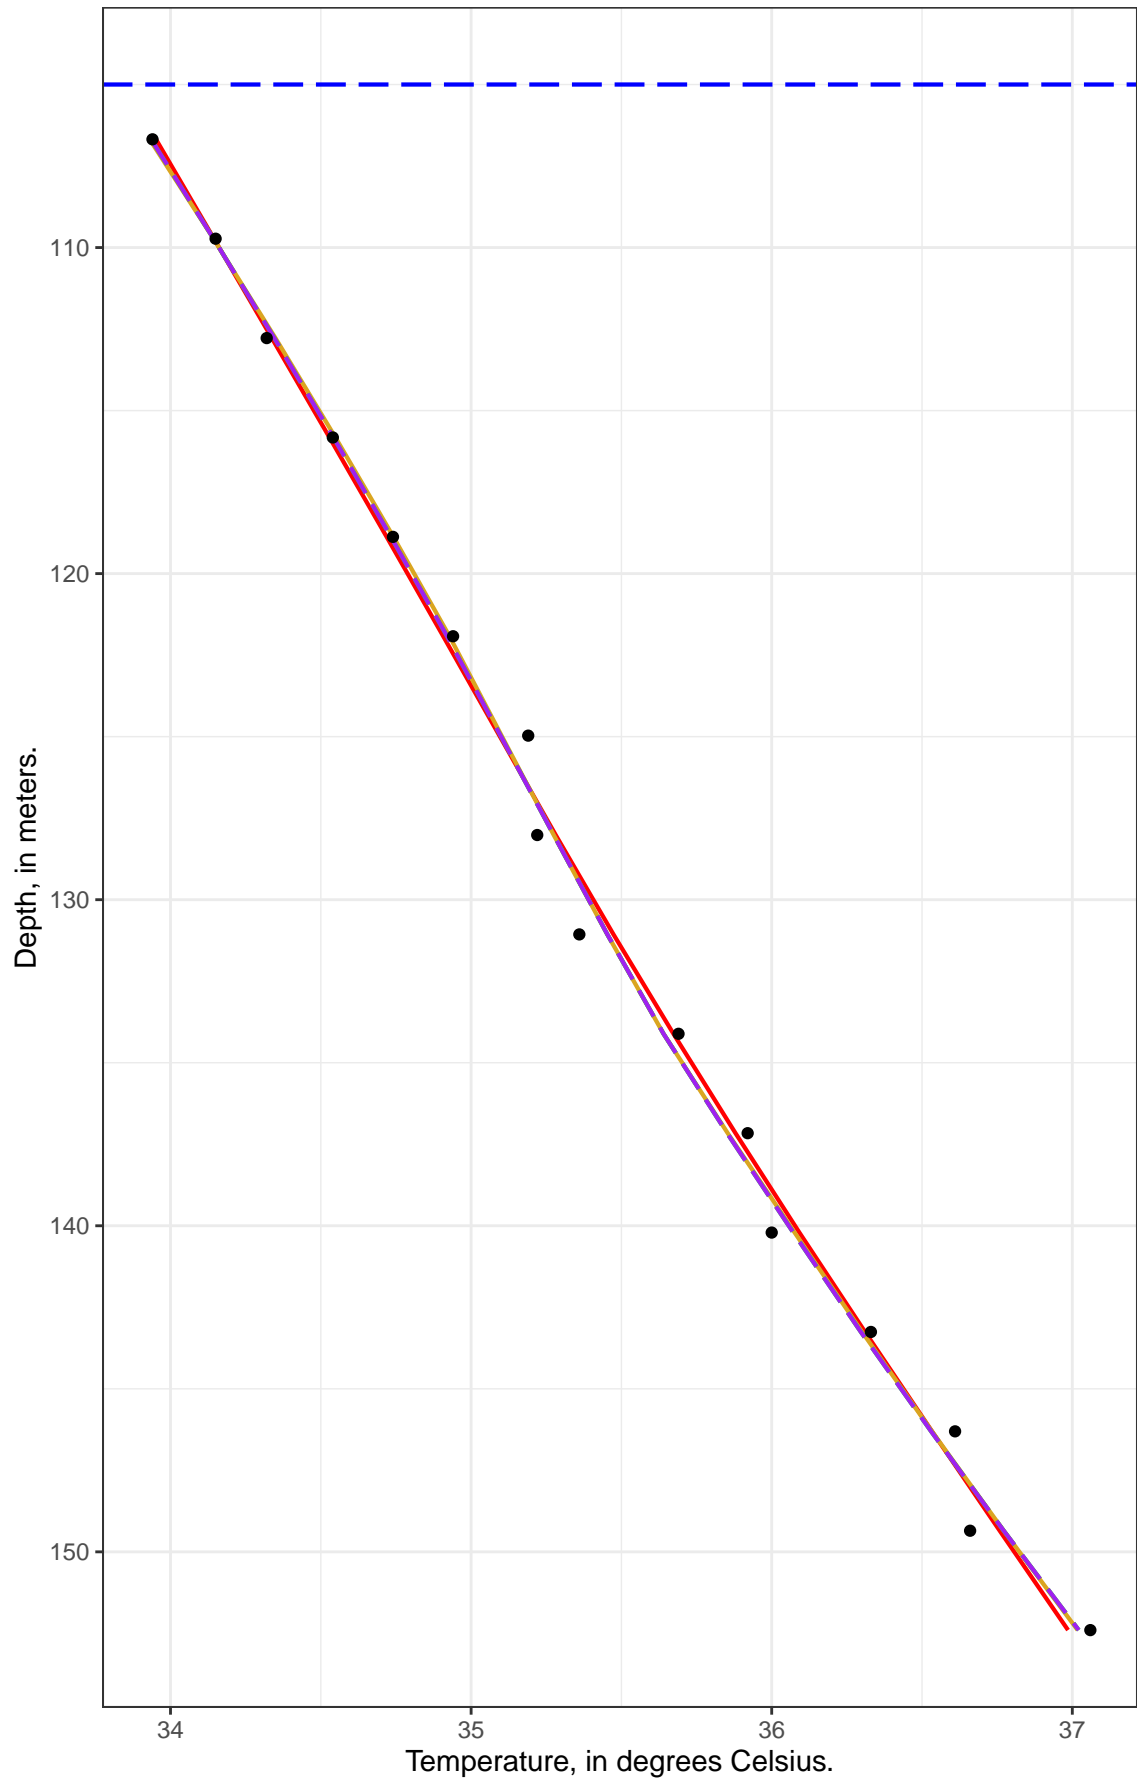

ID: 90 [H-2-80-1479\_KILBOURNE\_HOLE] First Derivative

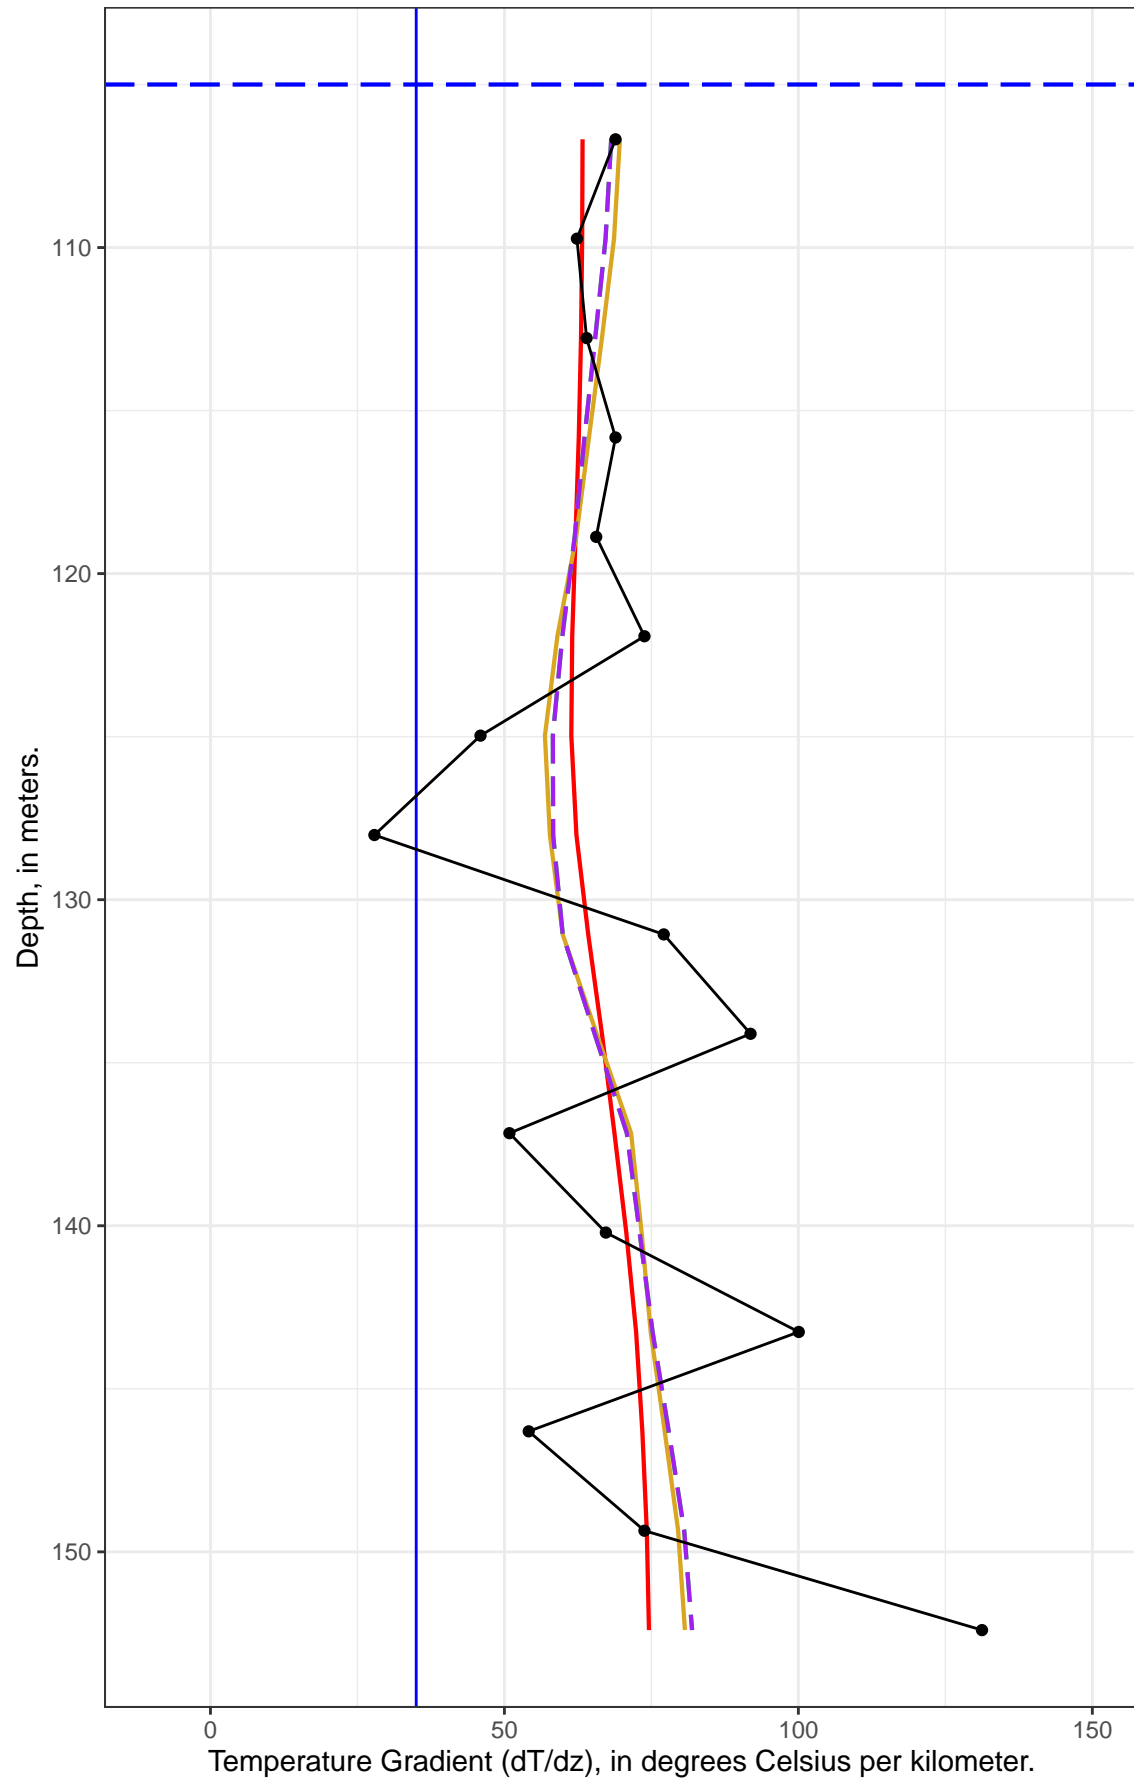

ID: 90 [H-2-80-1479\_KILBOURNE\_HOLE] Second Derivative

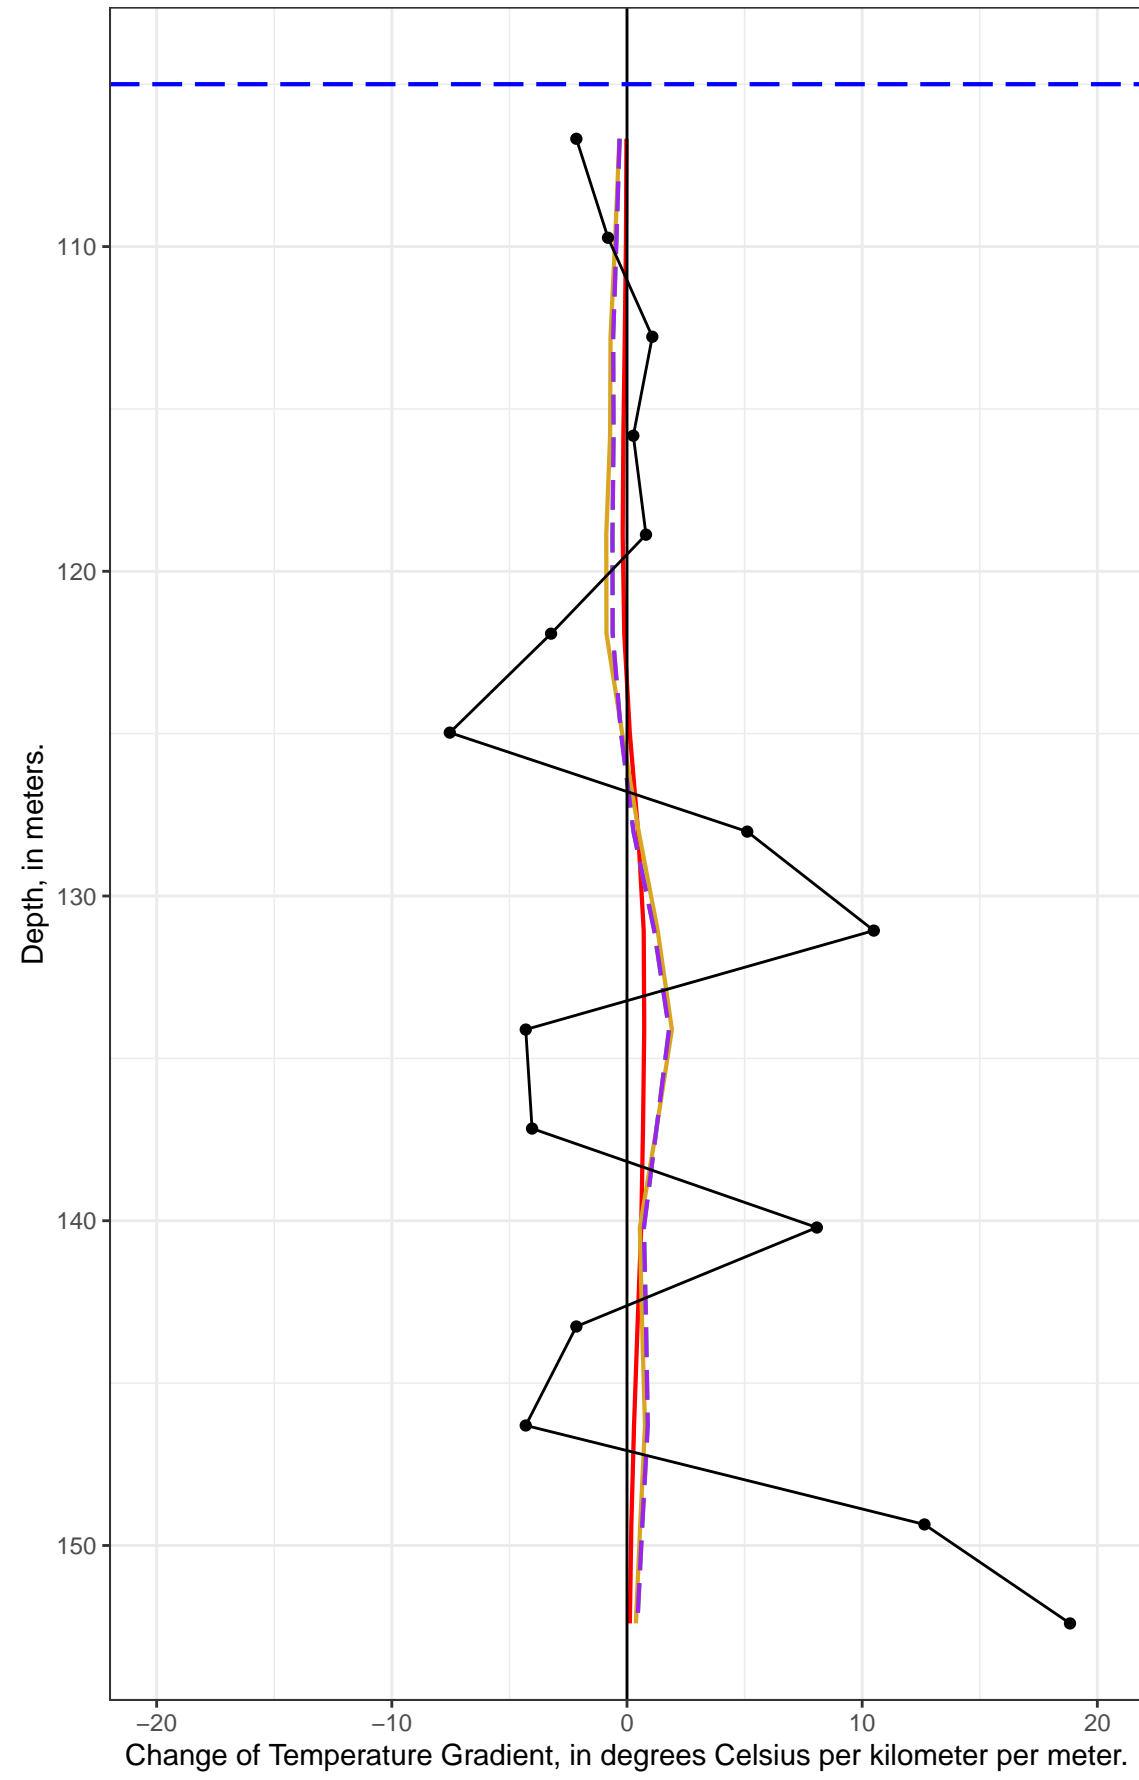

• Data — LOESS (AICC) — LOESS (constant) — LOESS (GCV) — Spline

• Data — LOESS (AICC) — LOESS (constant) — LOESS (GCV) — Spline

• Data — LOESS (AICC) — LOESS (constant) — LOESS (GCV) — Spline

ID: 91 [H-2-80-1480\_KILBOURNE\_HOLE] Smoothed Profile

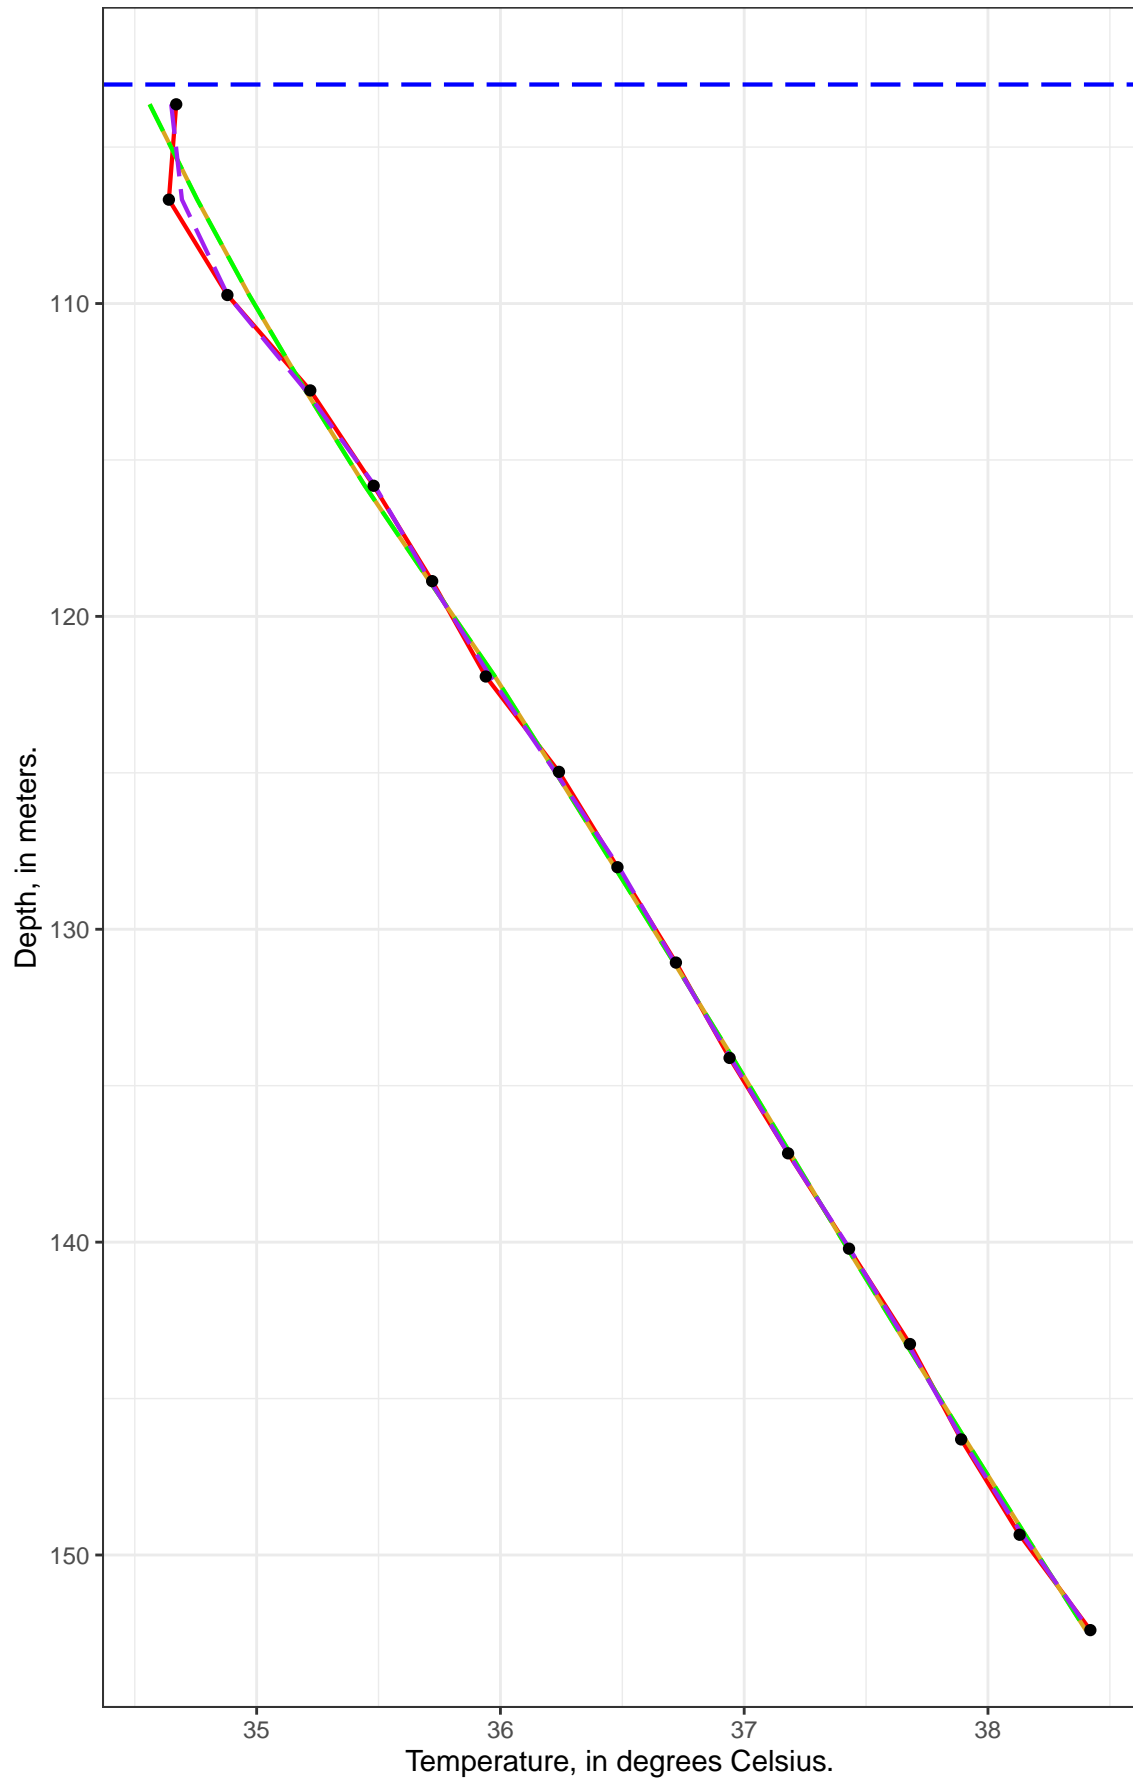

ID: 91 [H-2-80-1480\_KILBOURNE\_HOLE] First Derivative

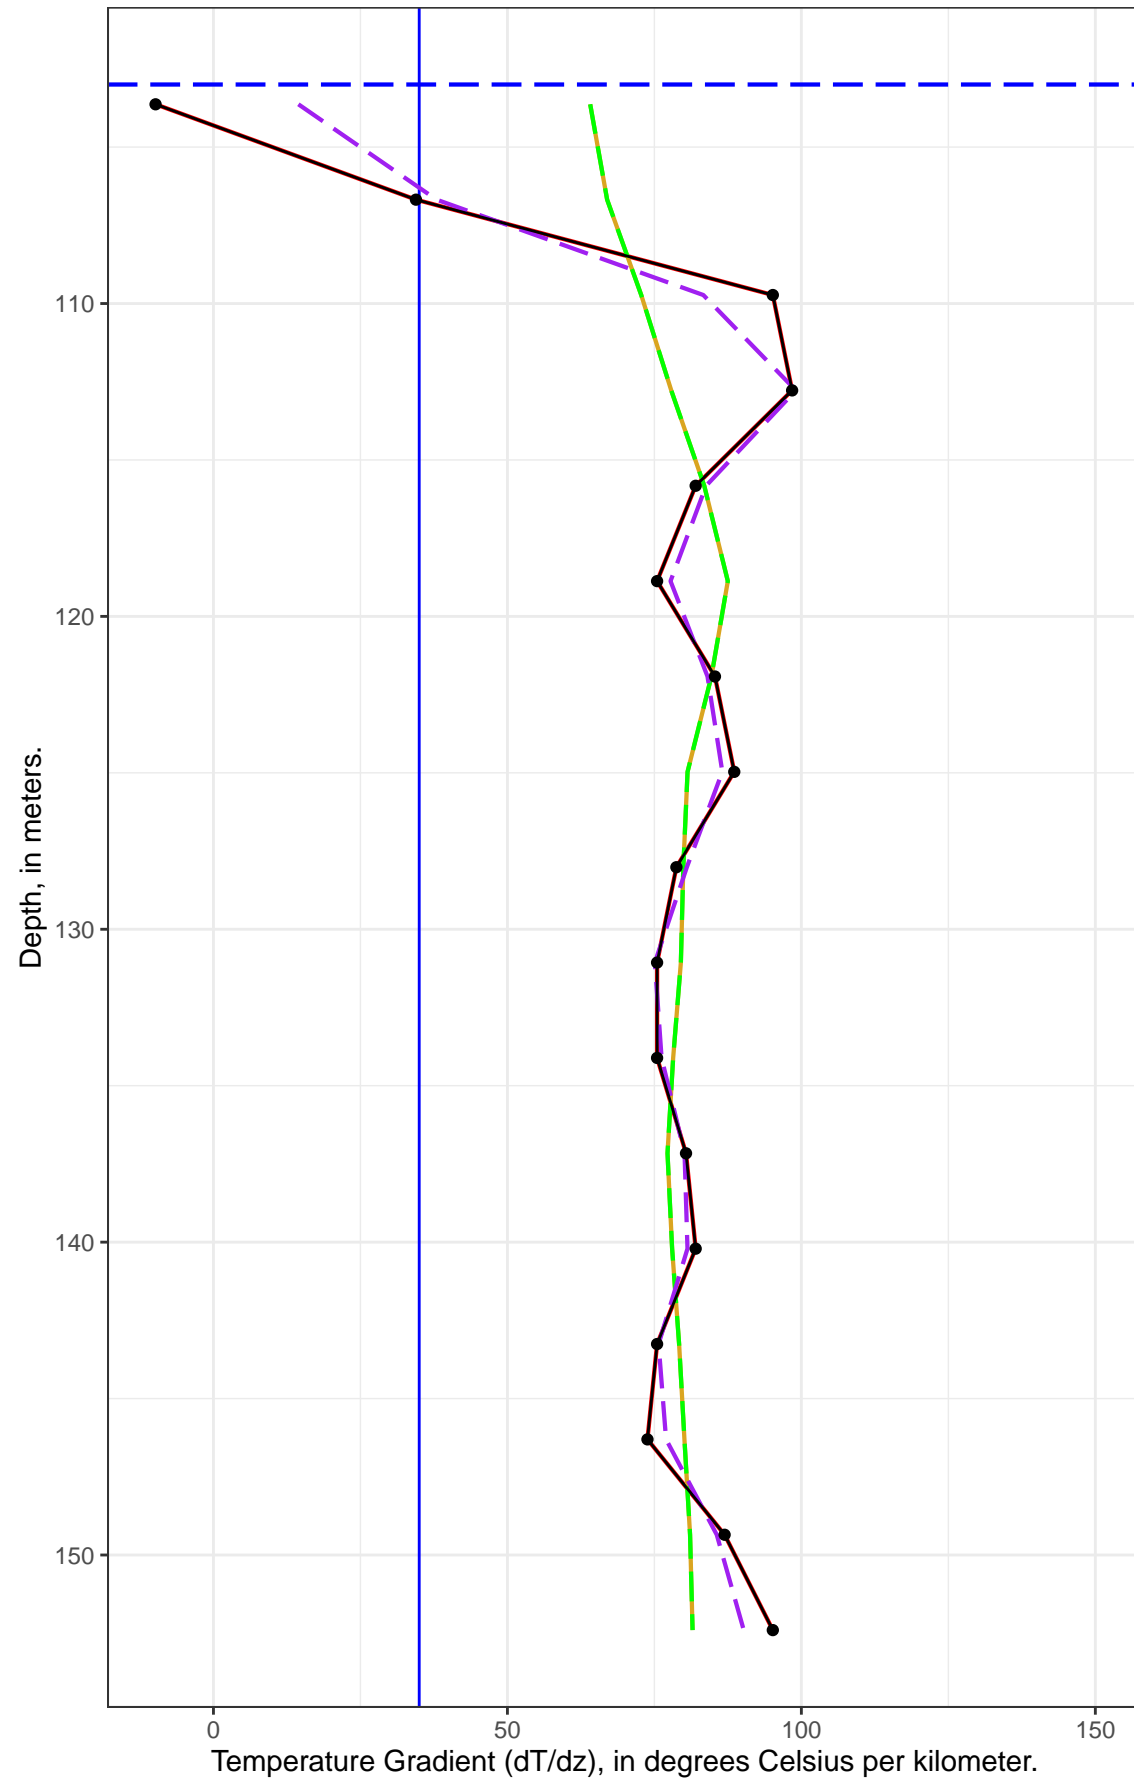

ID: 91 [H-2-80-1480\_KILBOURNE\_HOLE] Second Derivative

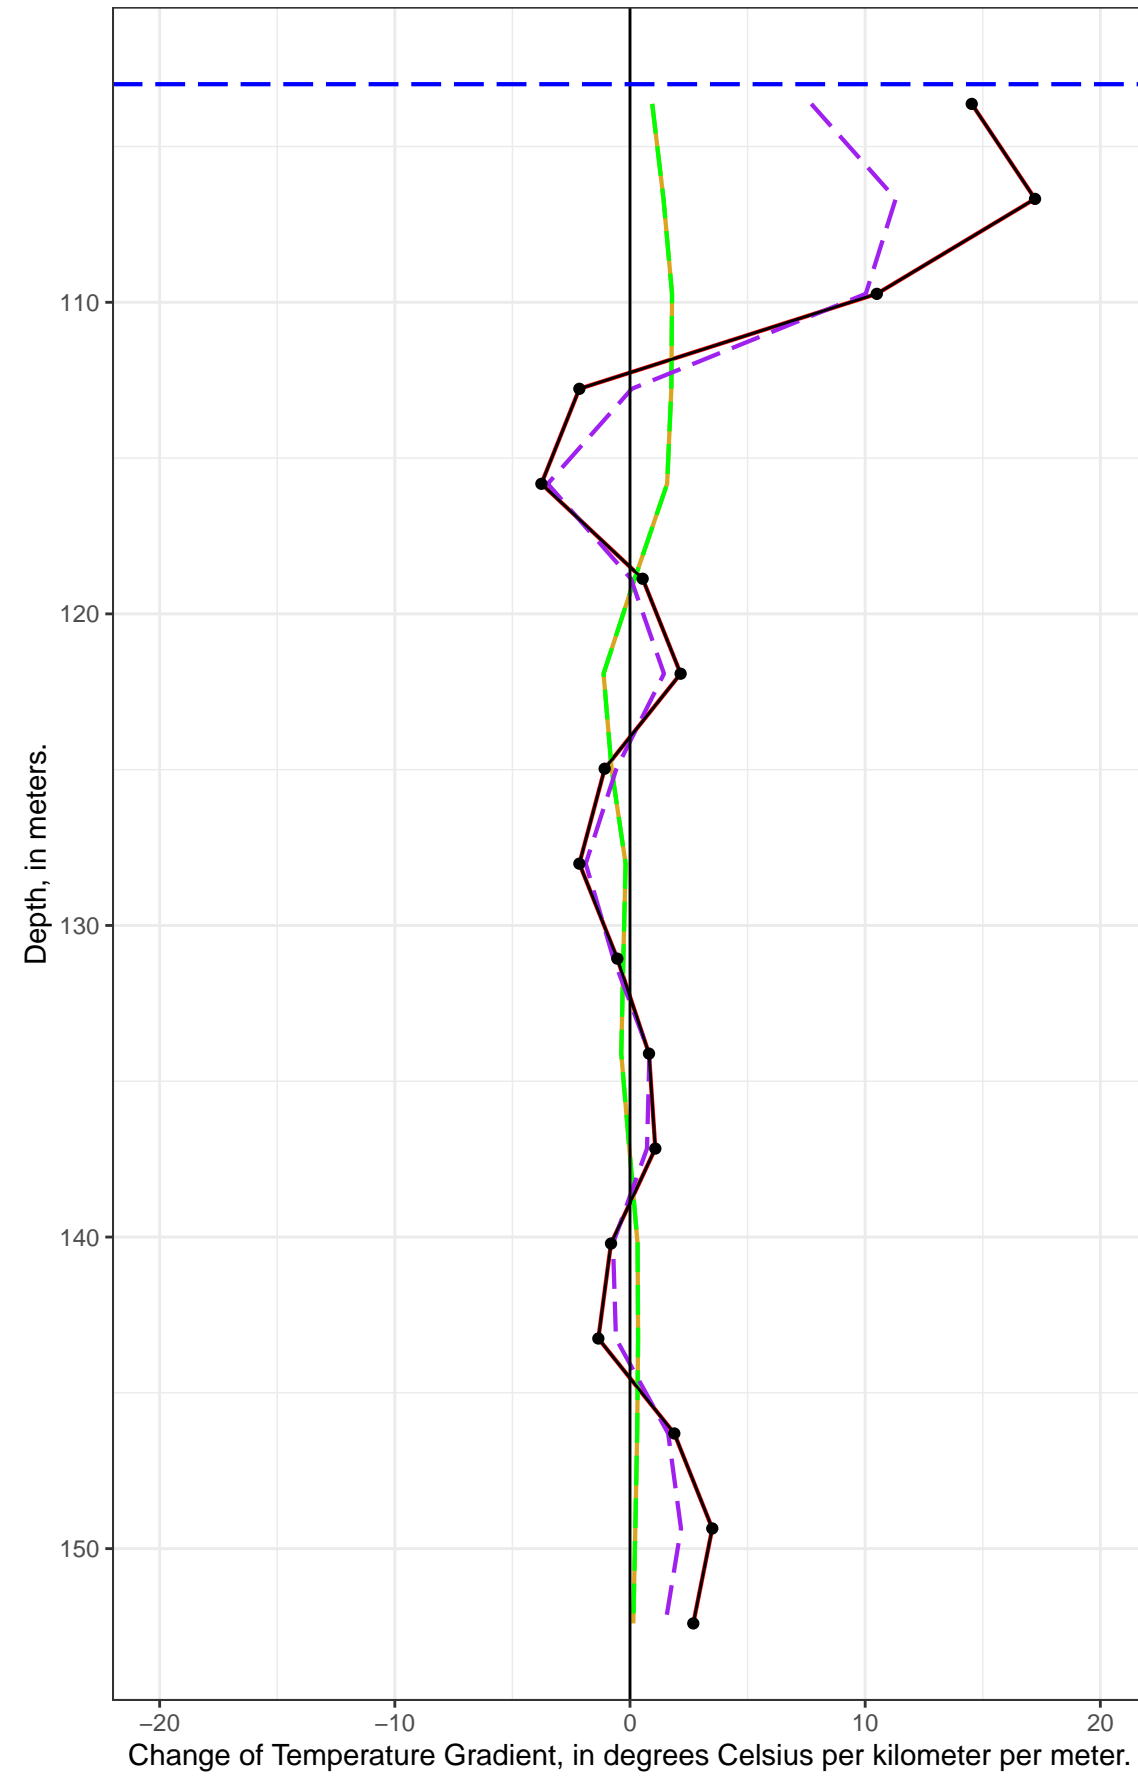

• Data — LOESS (AICC) — LOESS (constant) — LOESS (GCV) — Spline

• Data — LOESS (AICC) — LOESS (constant) — LOESS (GCV) — Spline

• Data — LOESS (AICC) — LOESS (constant) — LOESS (GCV) — Spline

ID: 92 [H-2-80-1481\_KILBOURNE\_HOLE] Smoothed Profile

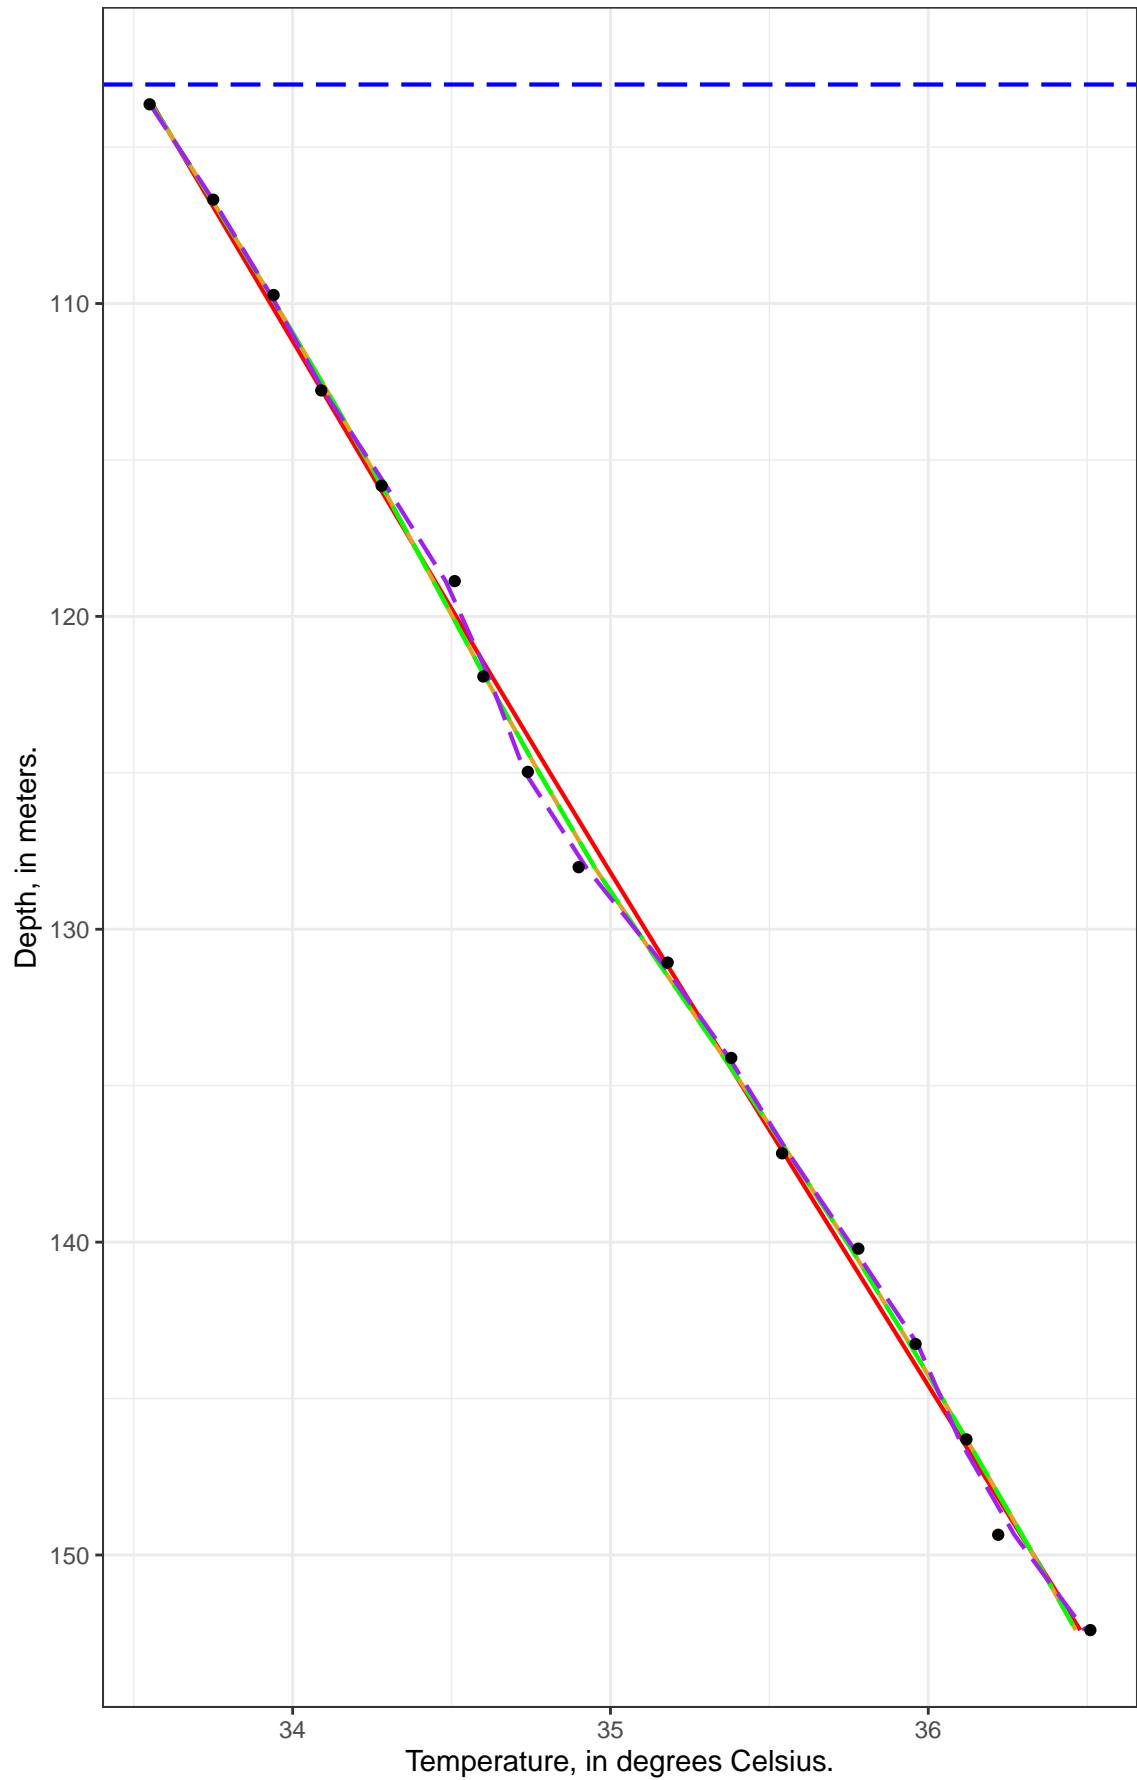

ID: 92 [H-2-80-1481\_KILBOURNE\_HOLE] First Derivative

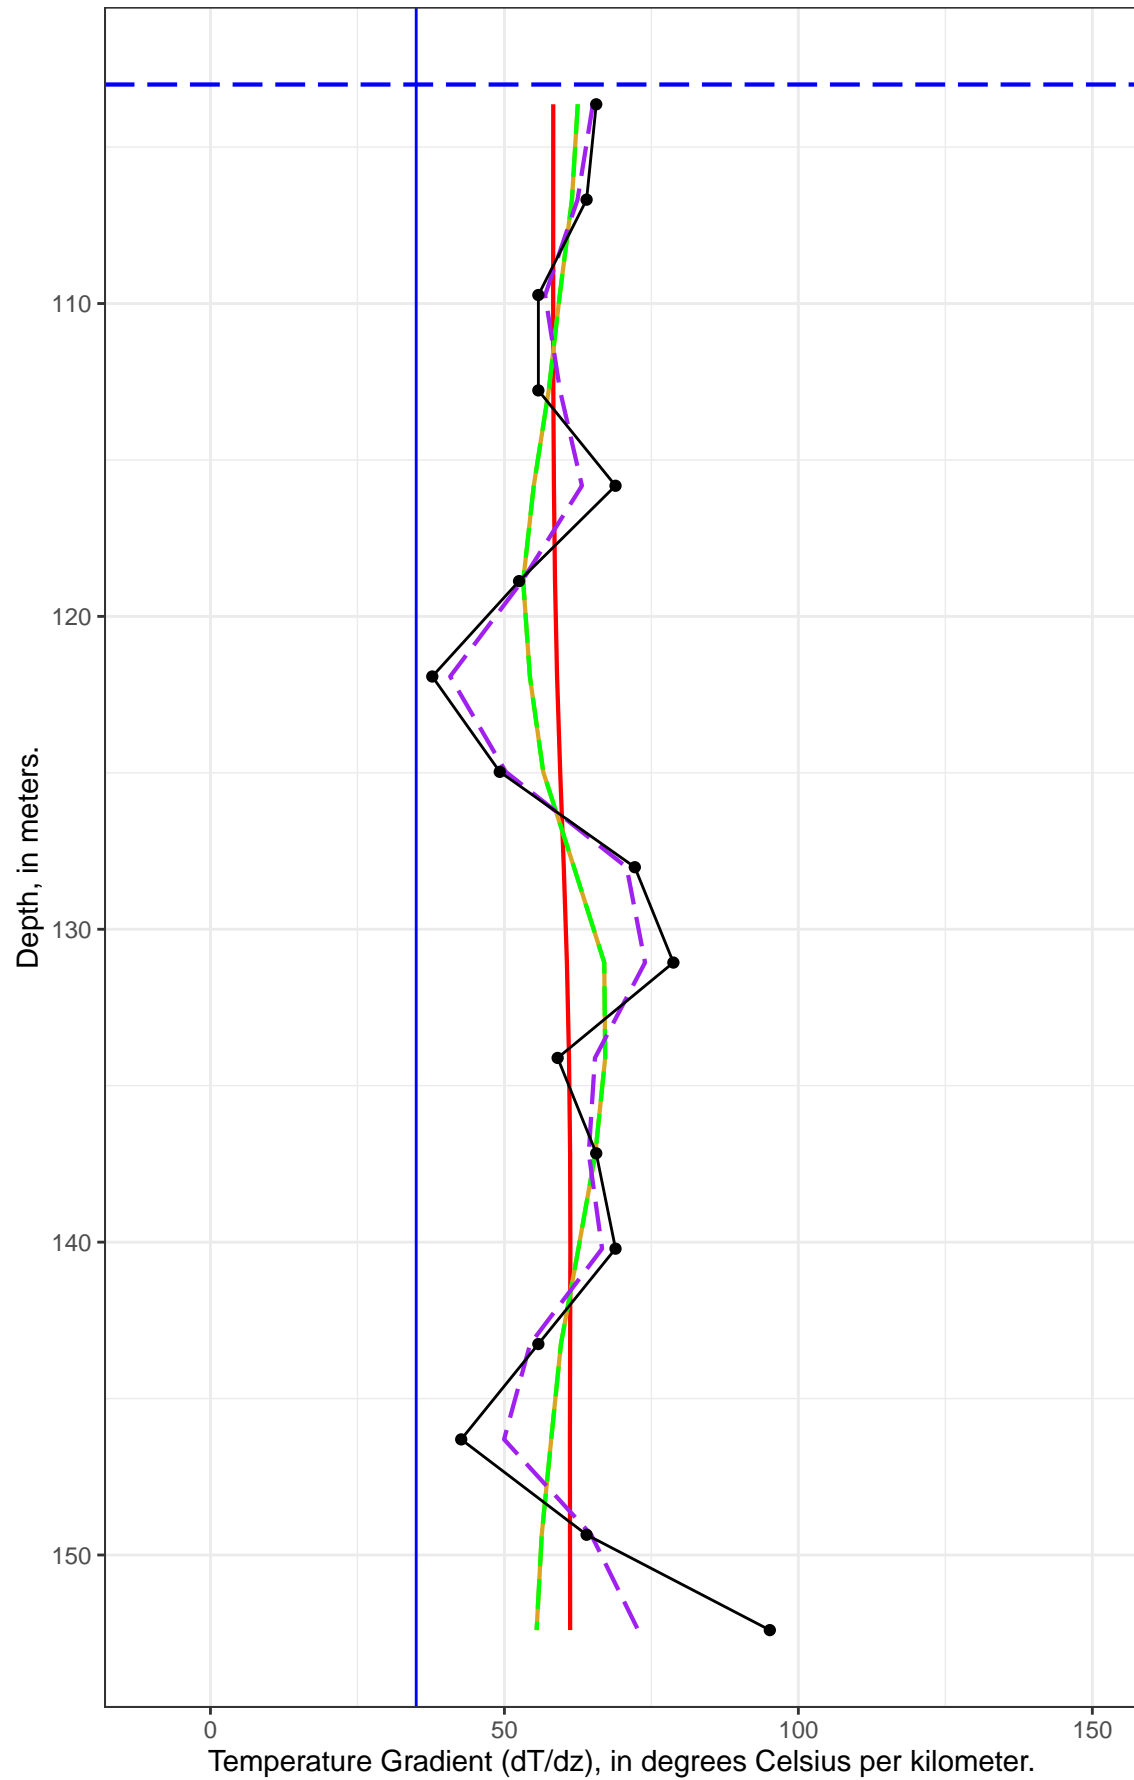

ID: 92 [H-2-80-1481\_KILBOURNE\_HOLE] Second Derivative

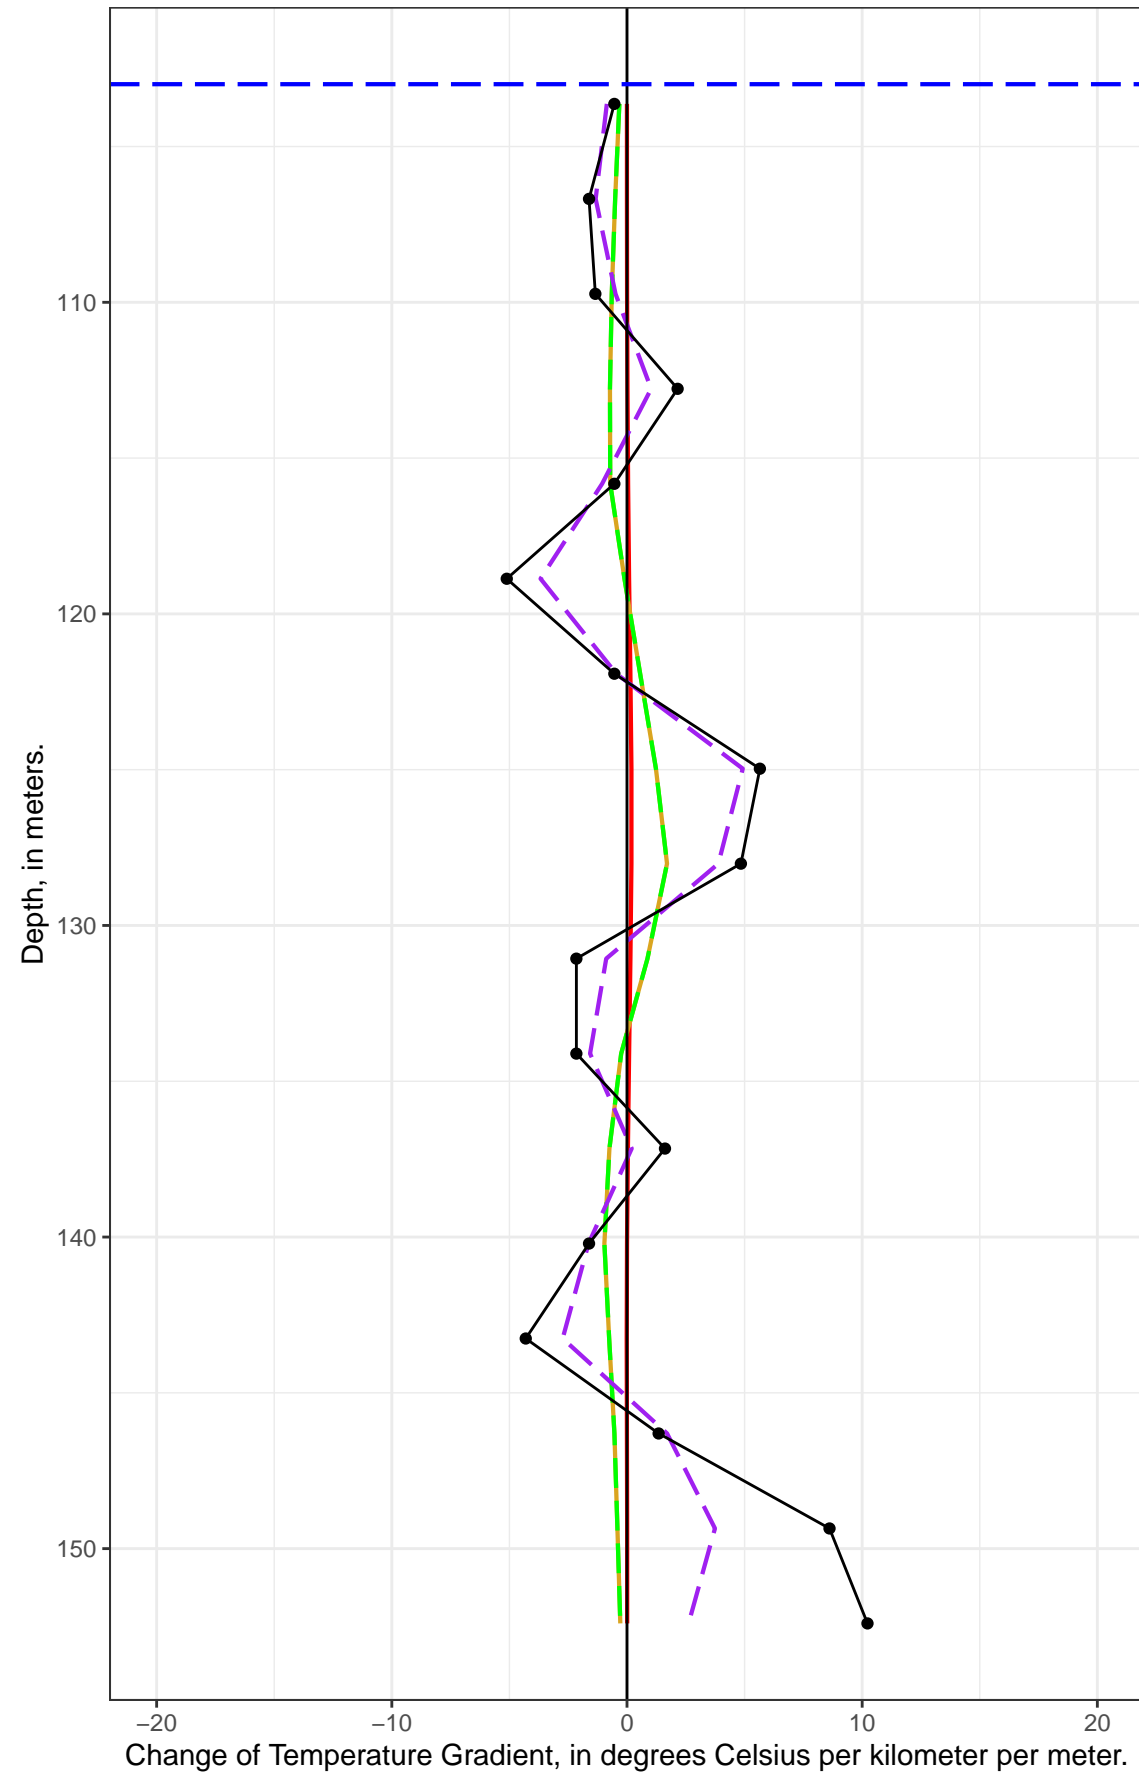

• Data — LOESS (AICC) — LOESS (constant) - - LOESS (GCV) — Spline

• Data — LOESS (AICC) — LOESS (constant) - - LOESS (GCV) — Spline

• Data — LOESS (AICC) — LOESS (constant) - - LOESS (GCV) — Spline



ID: 93 [H-2-80-1482\_KILBOURNE\_HOLE] Smoothed Profile

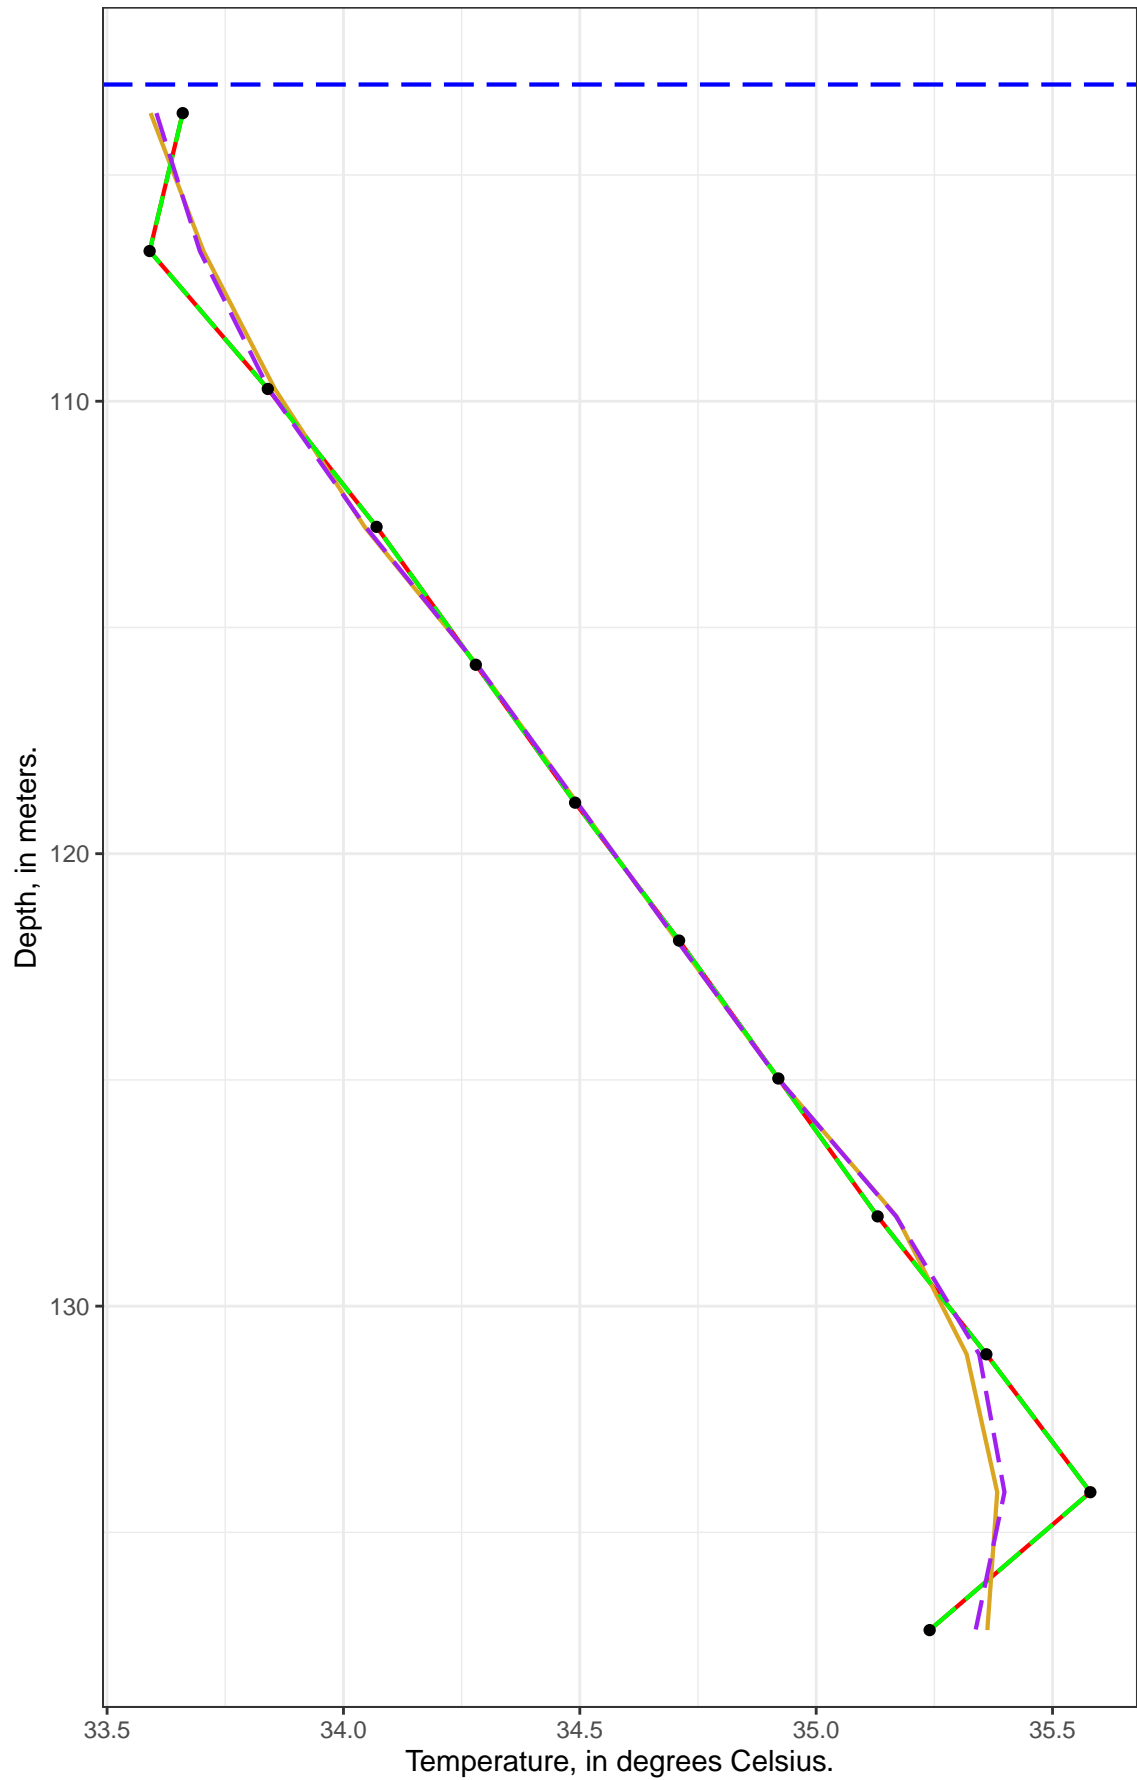

ID: 93 [H-2-80-1482\_KILBOURNE\_HOLE] First Derivative

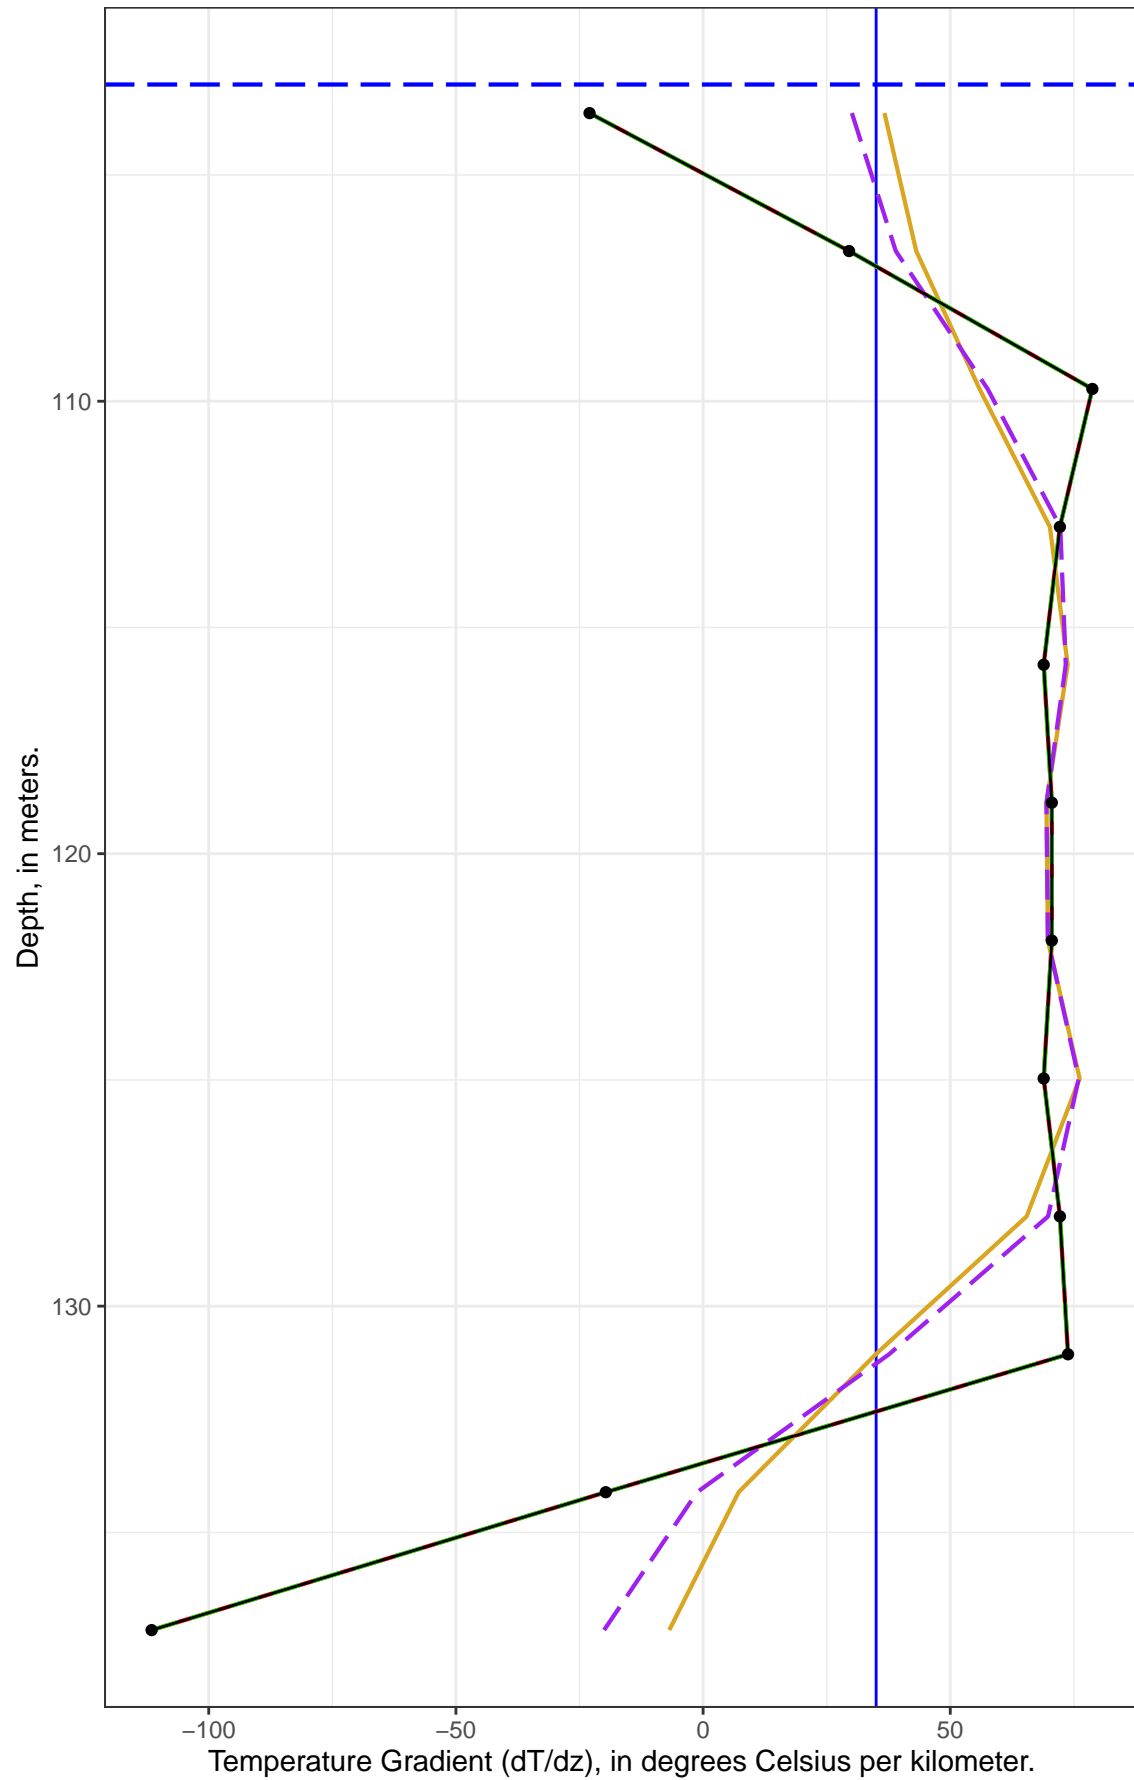

ID: 93 [H-2-80-1482\_KILBOURNE\_HOLE] Second Derivative

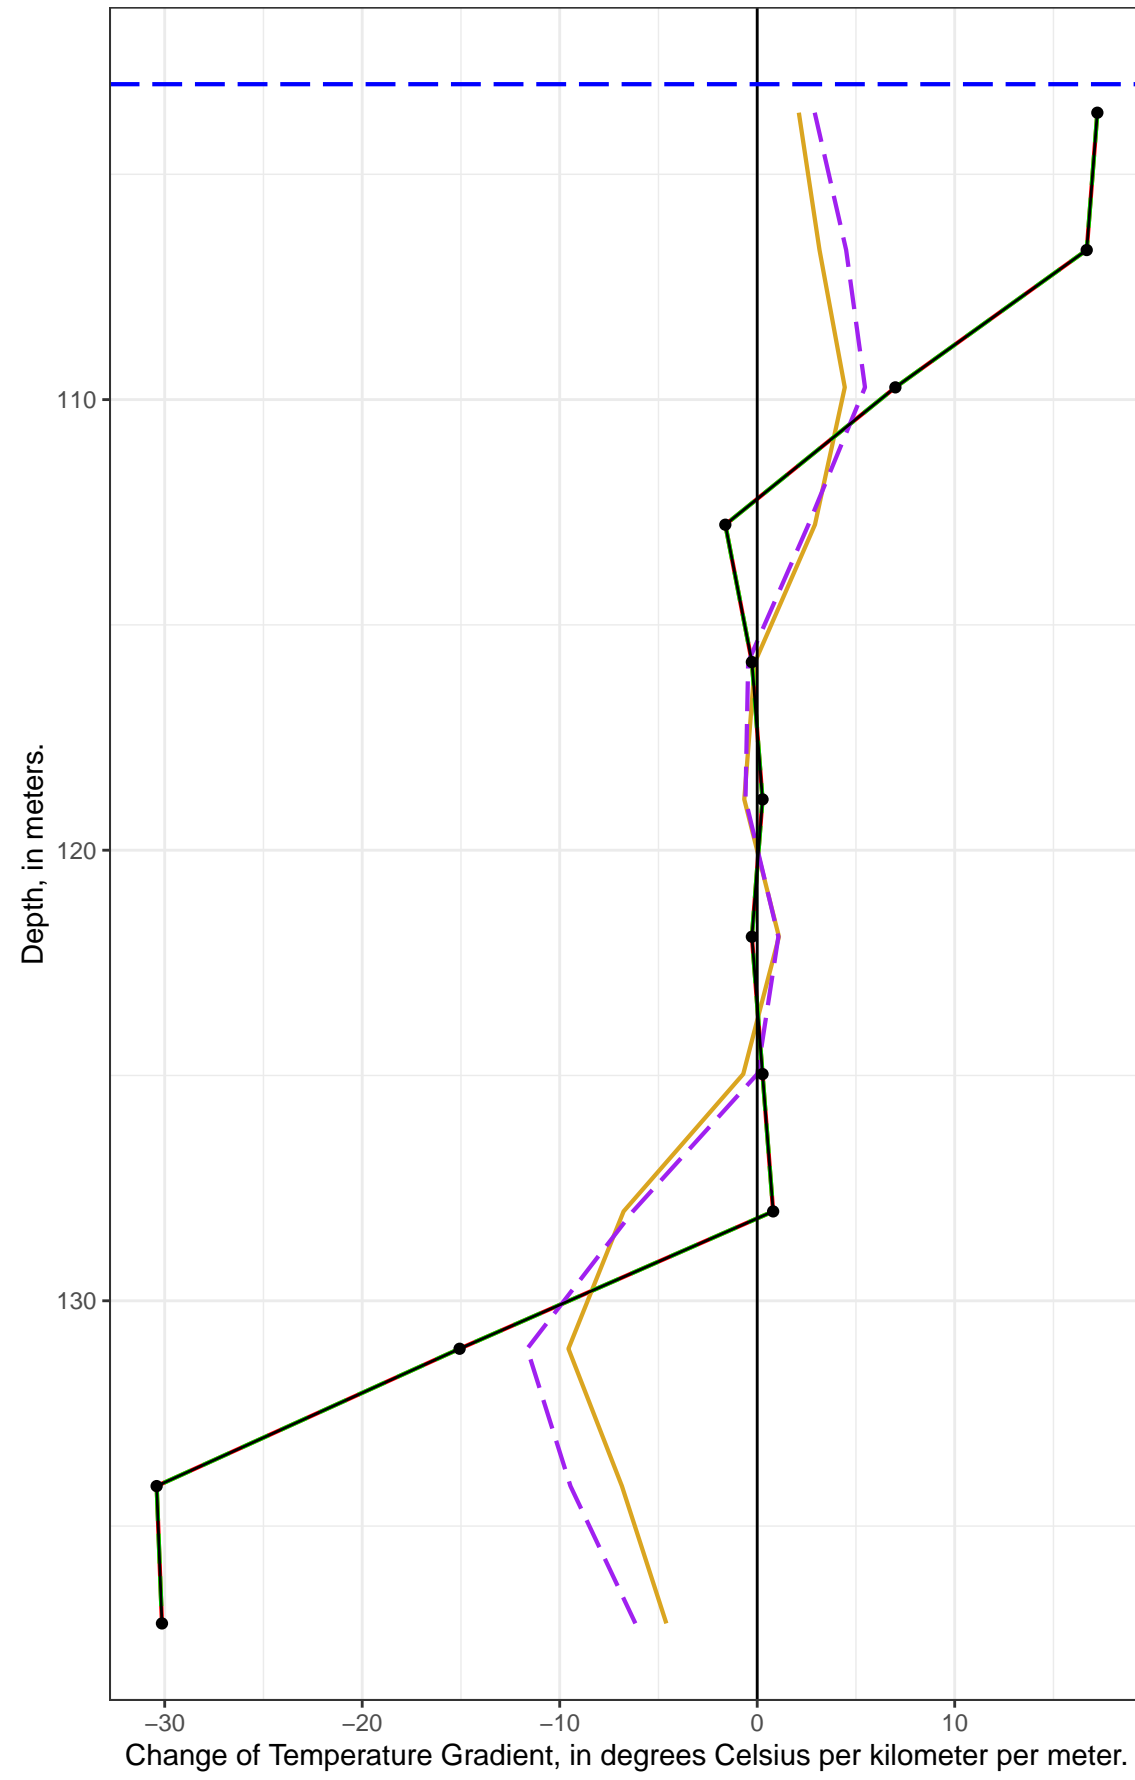

• Data — LOESS (AICC) — LOESS (constant) — LOESS (GCV) — Spline

• Data — LOESS (AICC) — LOESS (constant) — LOESS (GCV) — Spline

• Data — LOESS (AICC) — LOESS (constant) — LOESS (GCV) — Spline

ID: 94 [H-2-80-1483\_KILBOURNE\_HOLE] Smoothed Profile

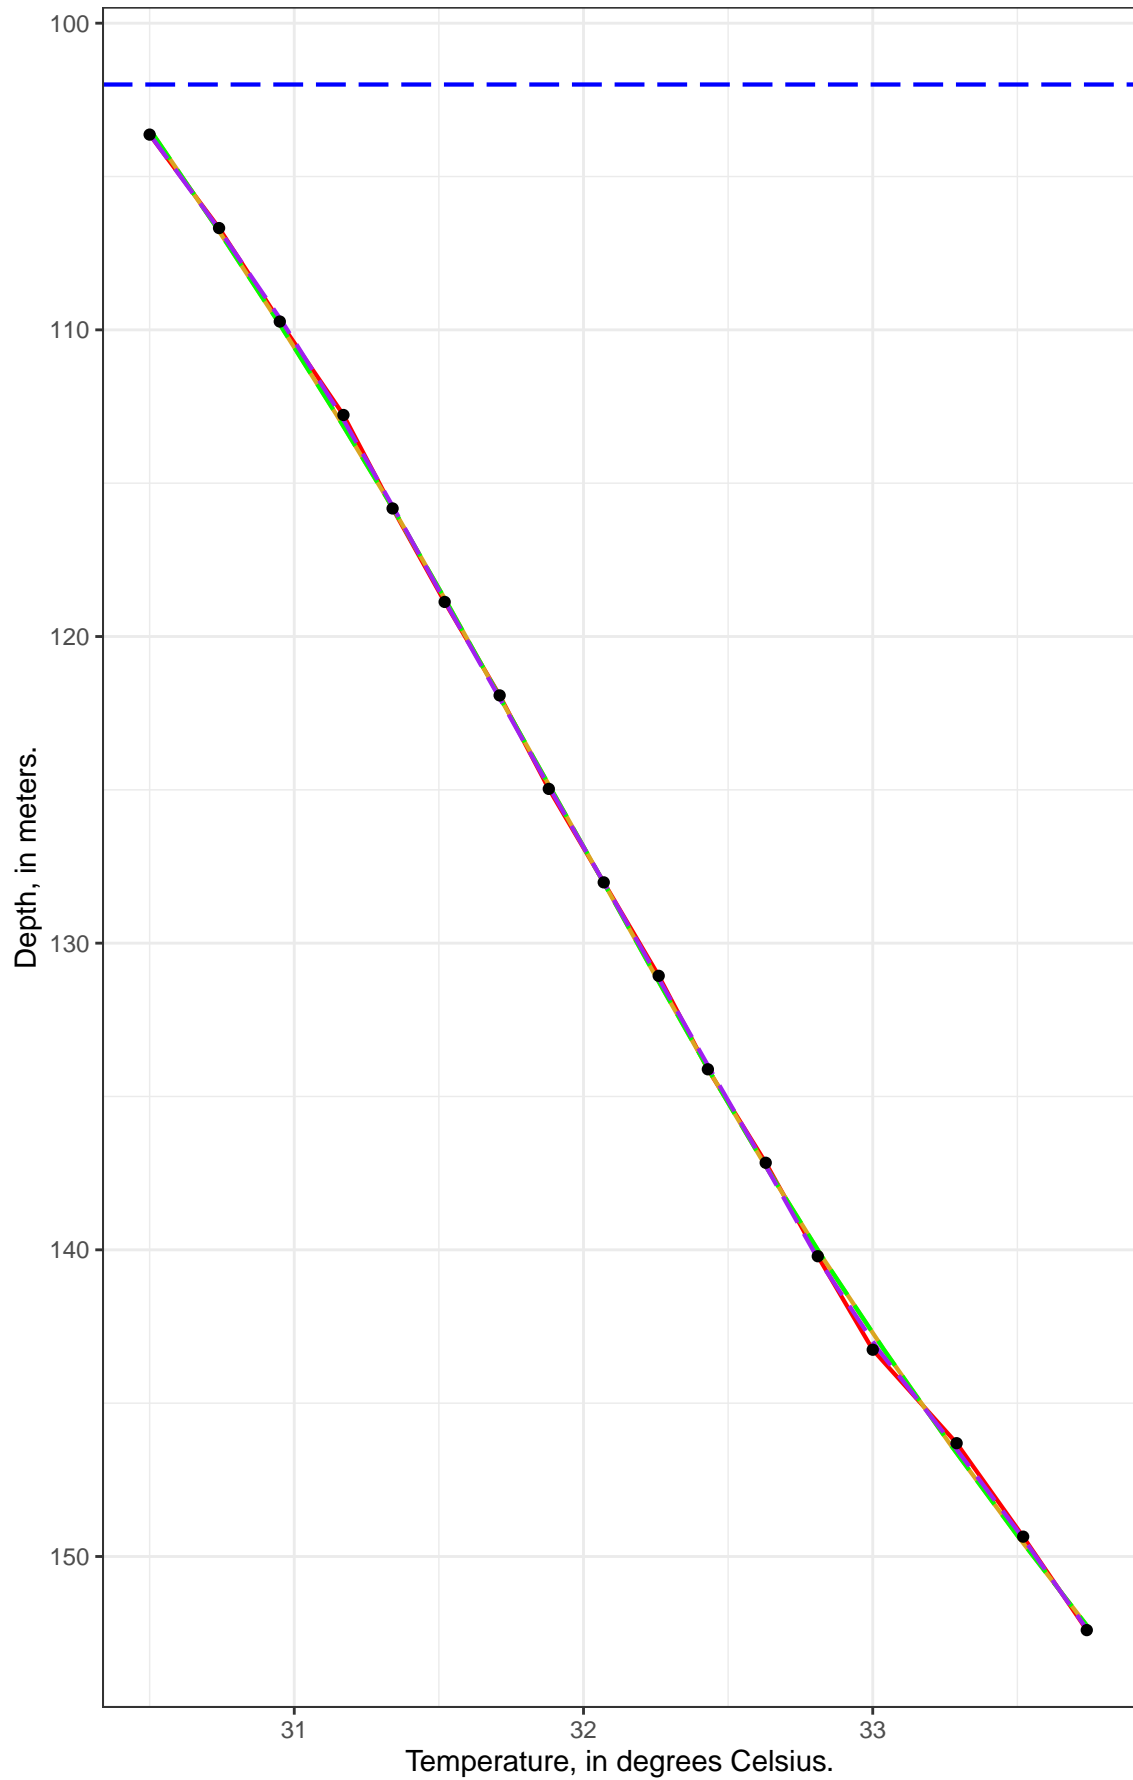

ID: 94 [H-2-80-1483\_KILBOURNE\_HOLE] First Derivative

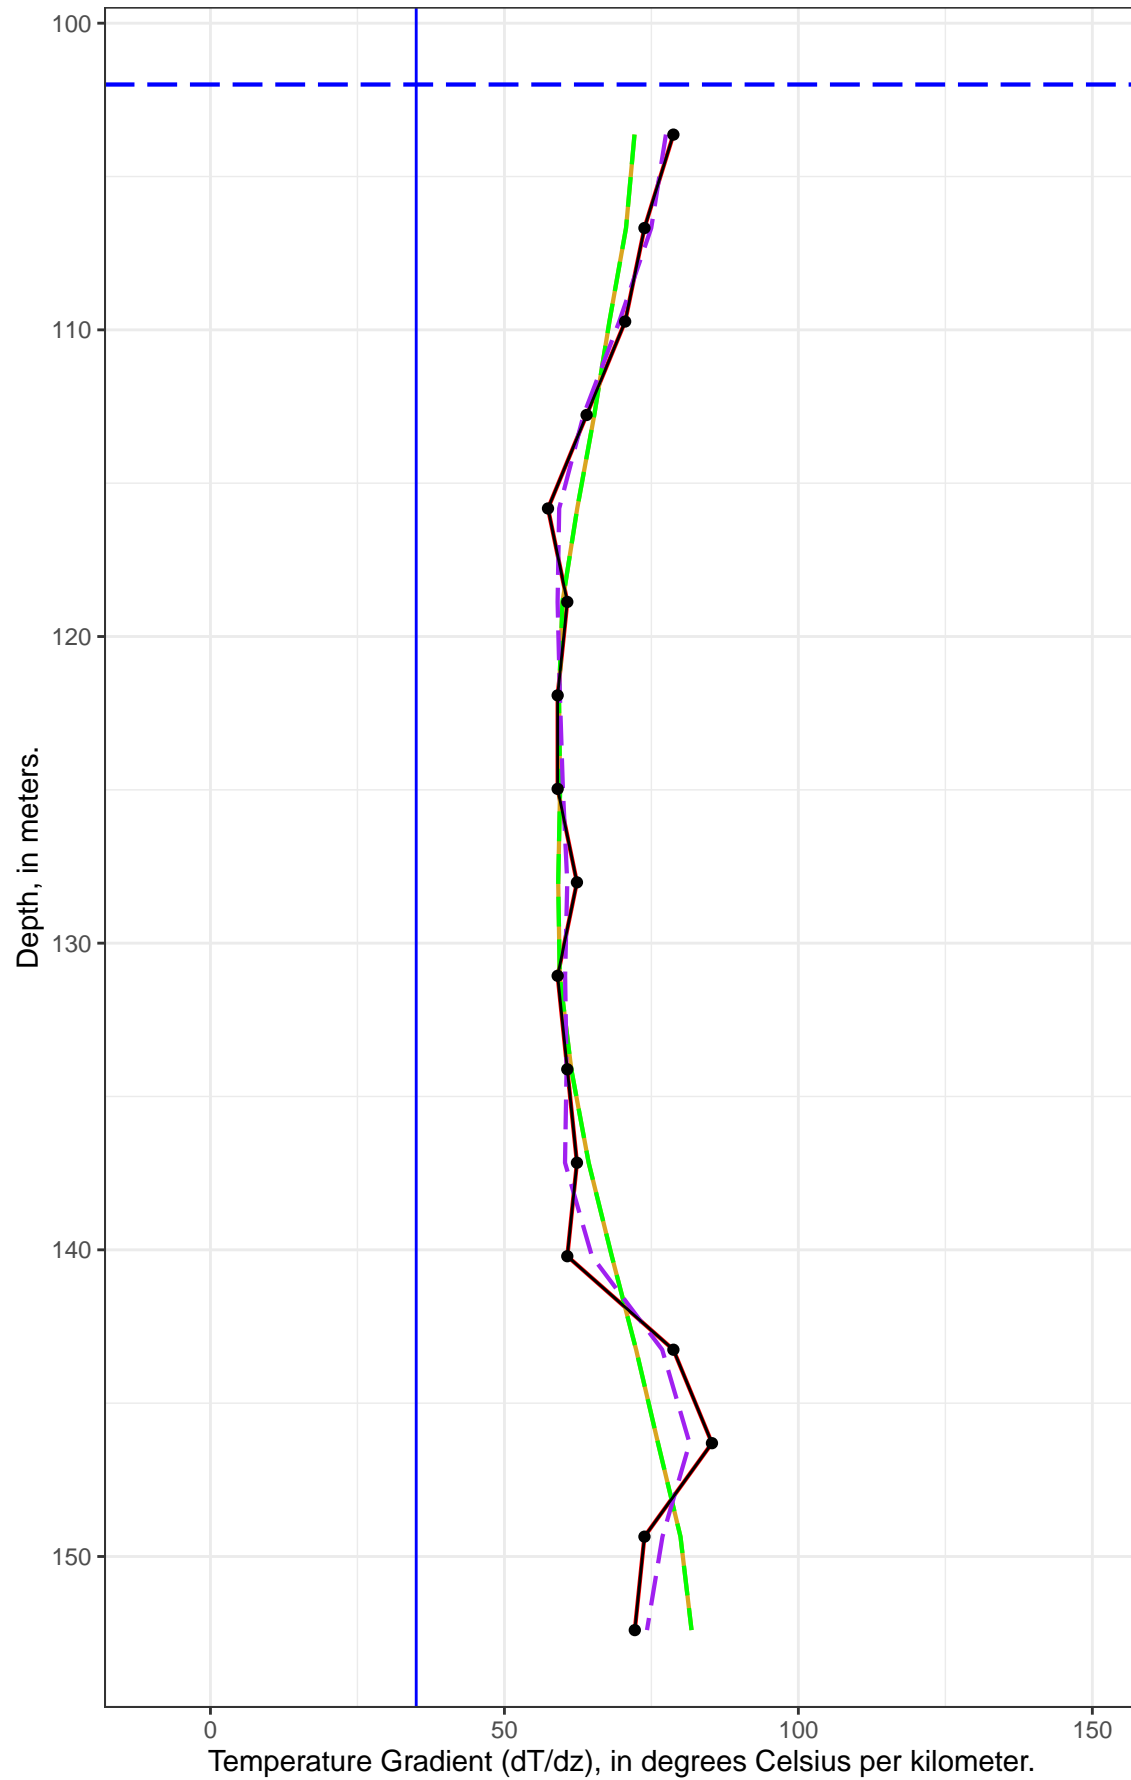

ID: 94 [H-2-80-1483\_KILBOURNE\_HOLE] Second Derivative

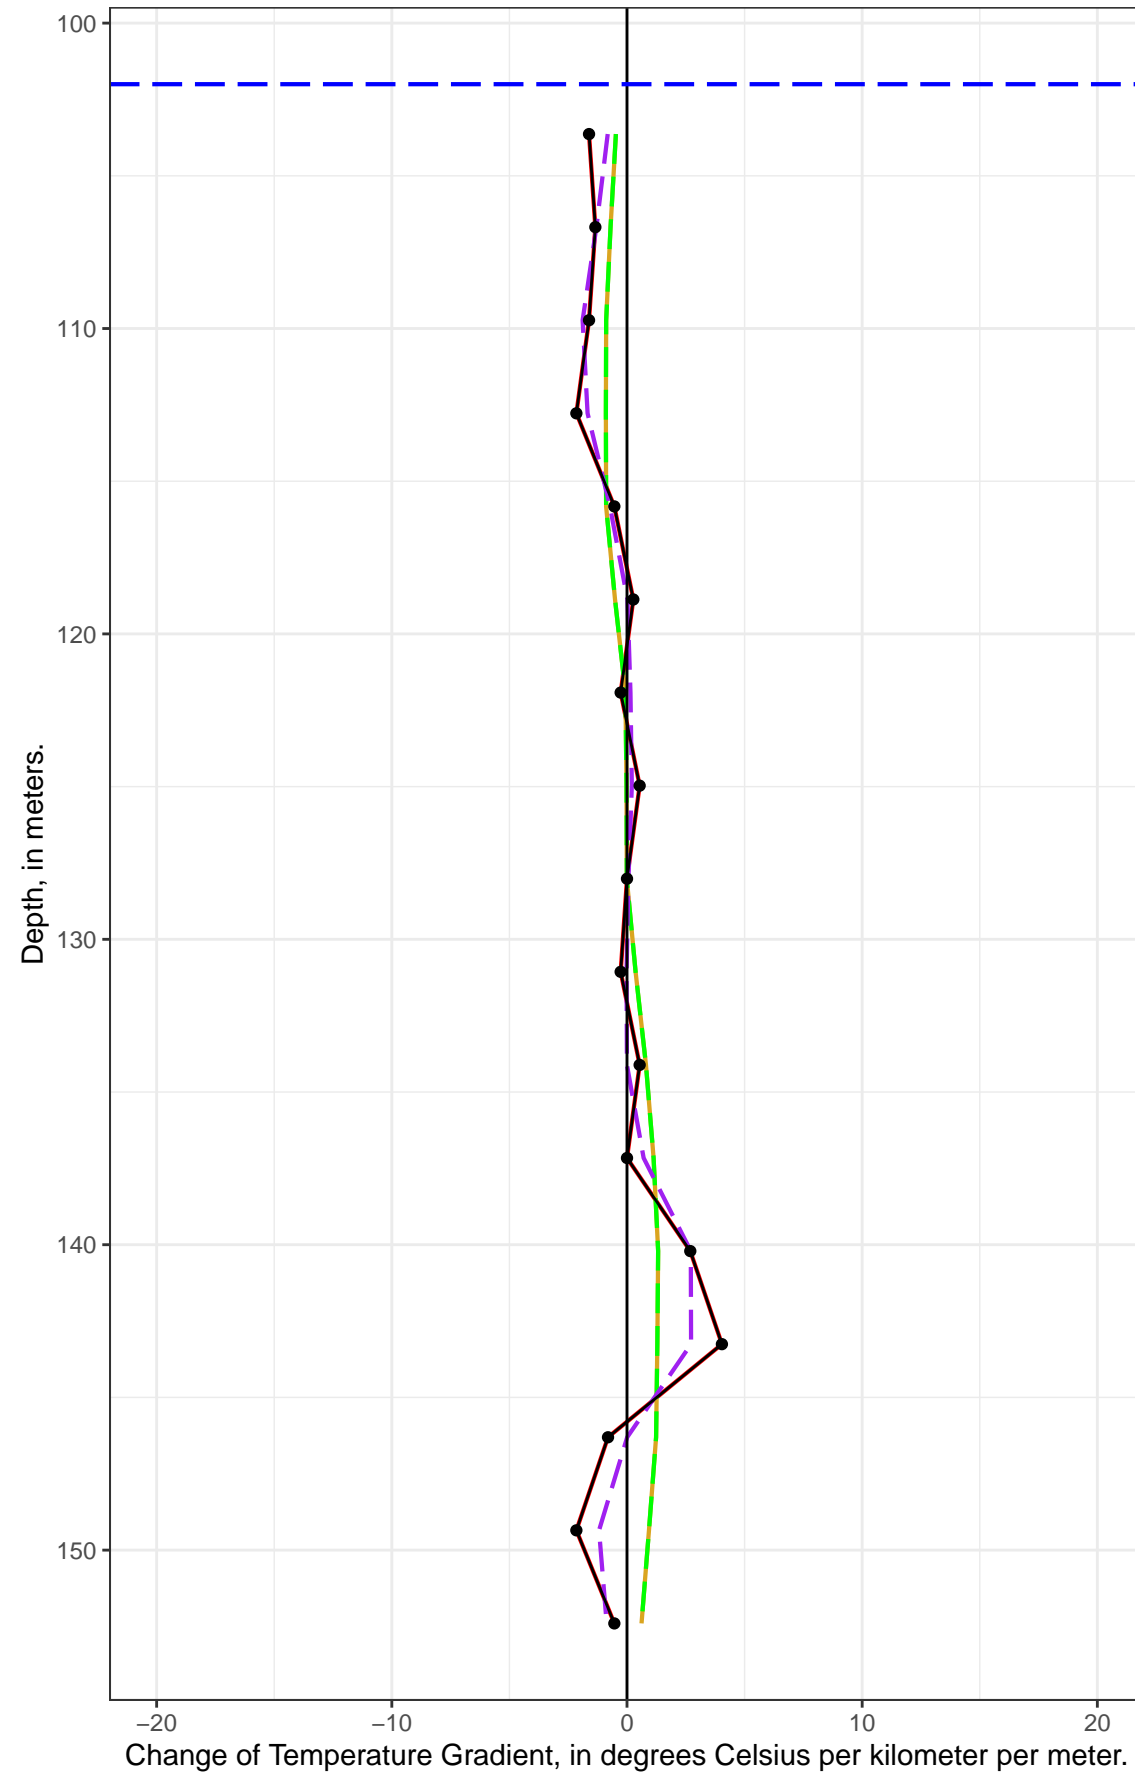

• Data — LOESS (AICC) — LOESS (constant) — LOESS (GCV) — Spline

• Data — LOESS (AICC) — LOESS (constant) — LOESS (GCV) — Spline

• Data — LOESS (AICC) — LOESS (constant) — LOESS (GCV) — Spline

ID: 95 [H-2-80-1484\_KILBOURNE\_HOLE] Smoothed Profile

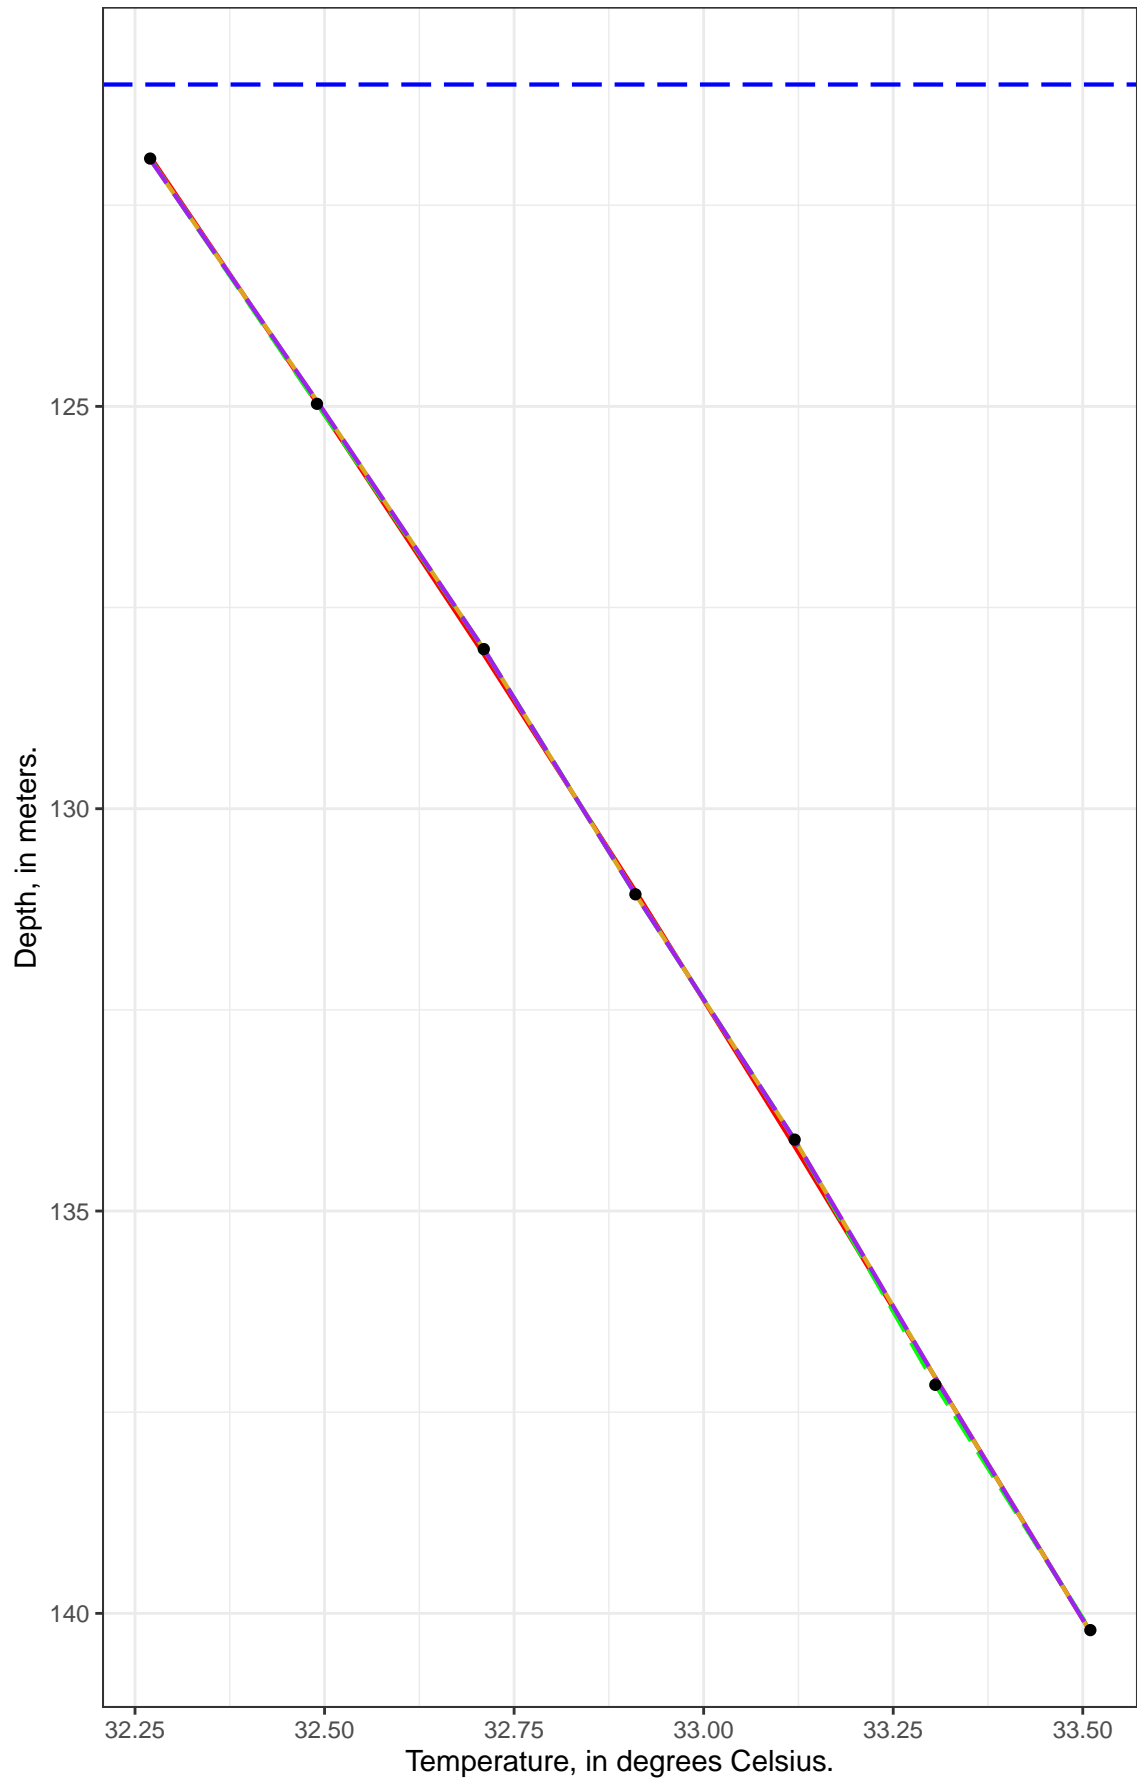

ID: 95 [H-2-80-1484\_KILBOURNE\_HOLE] First Derivative

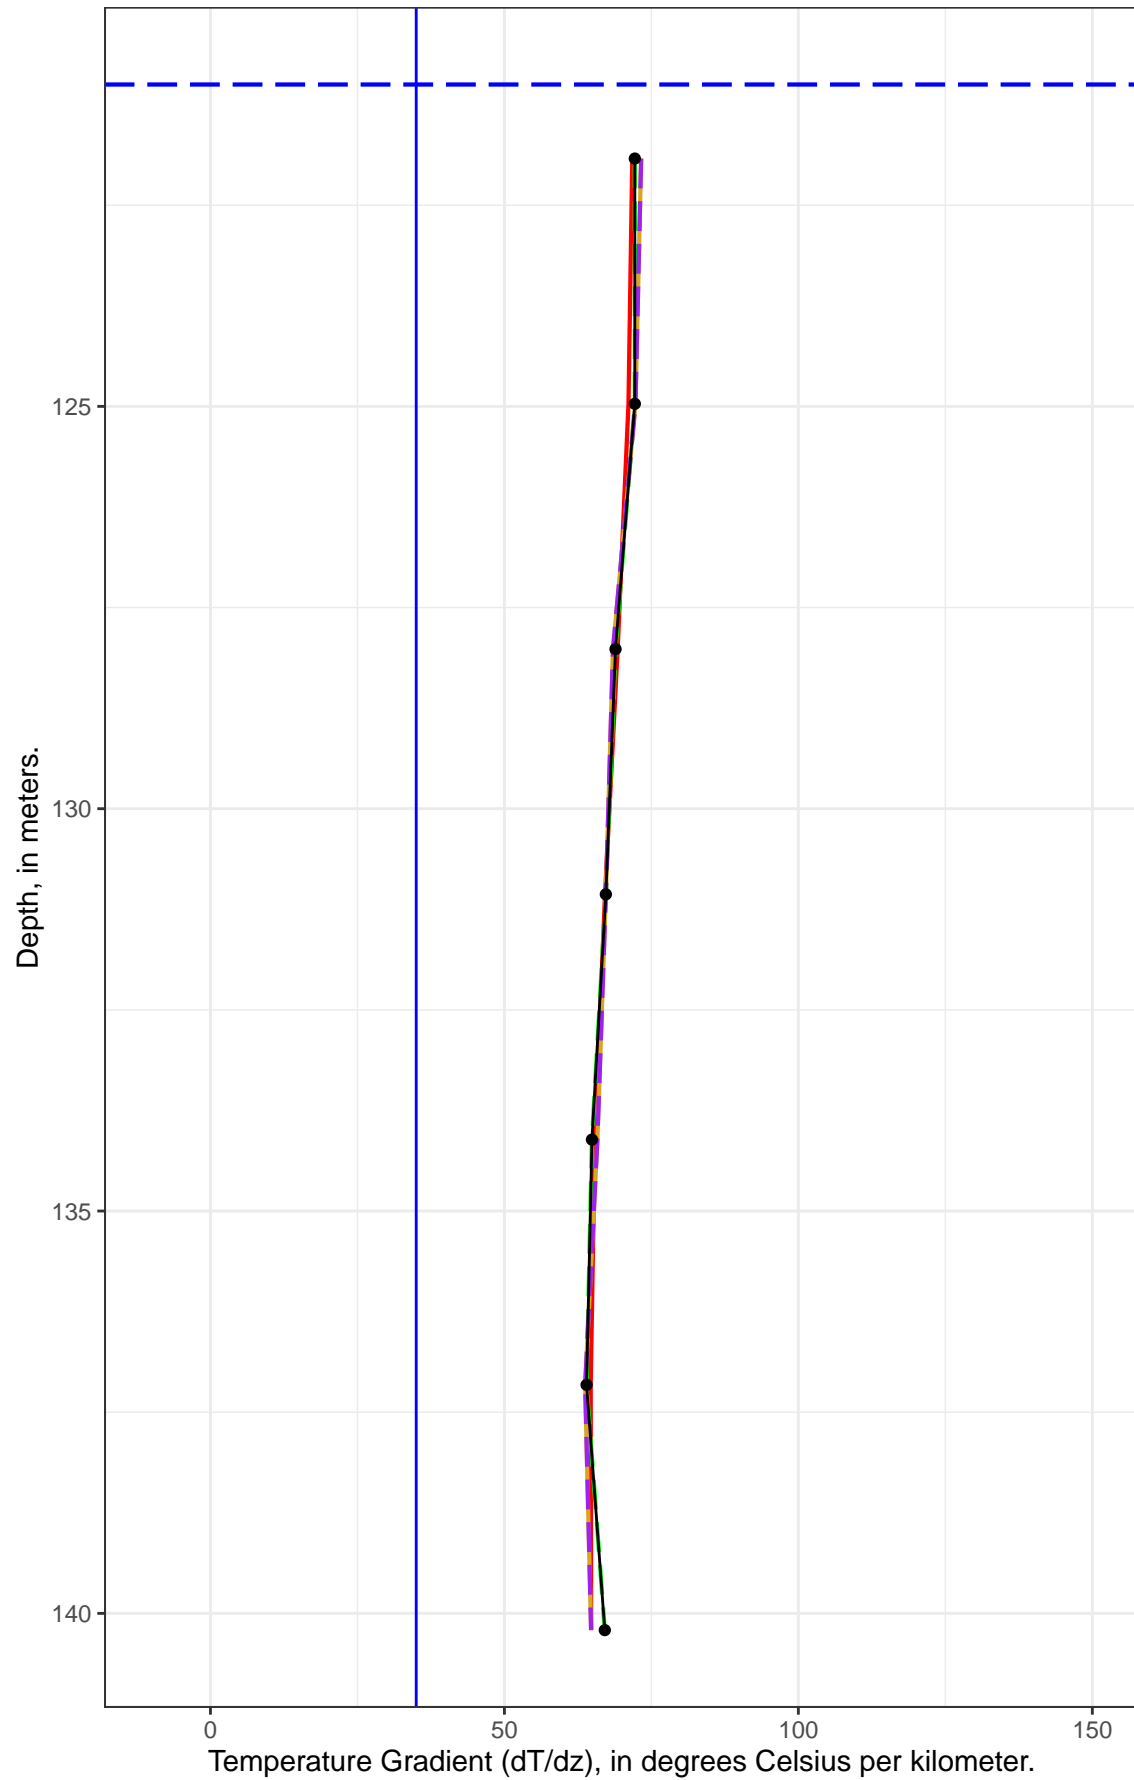

ID: 95 [H-2-80-1484\_KILBOURNE\_HOLE] Second Derivative

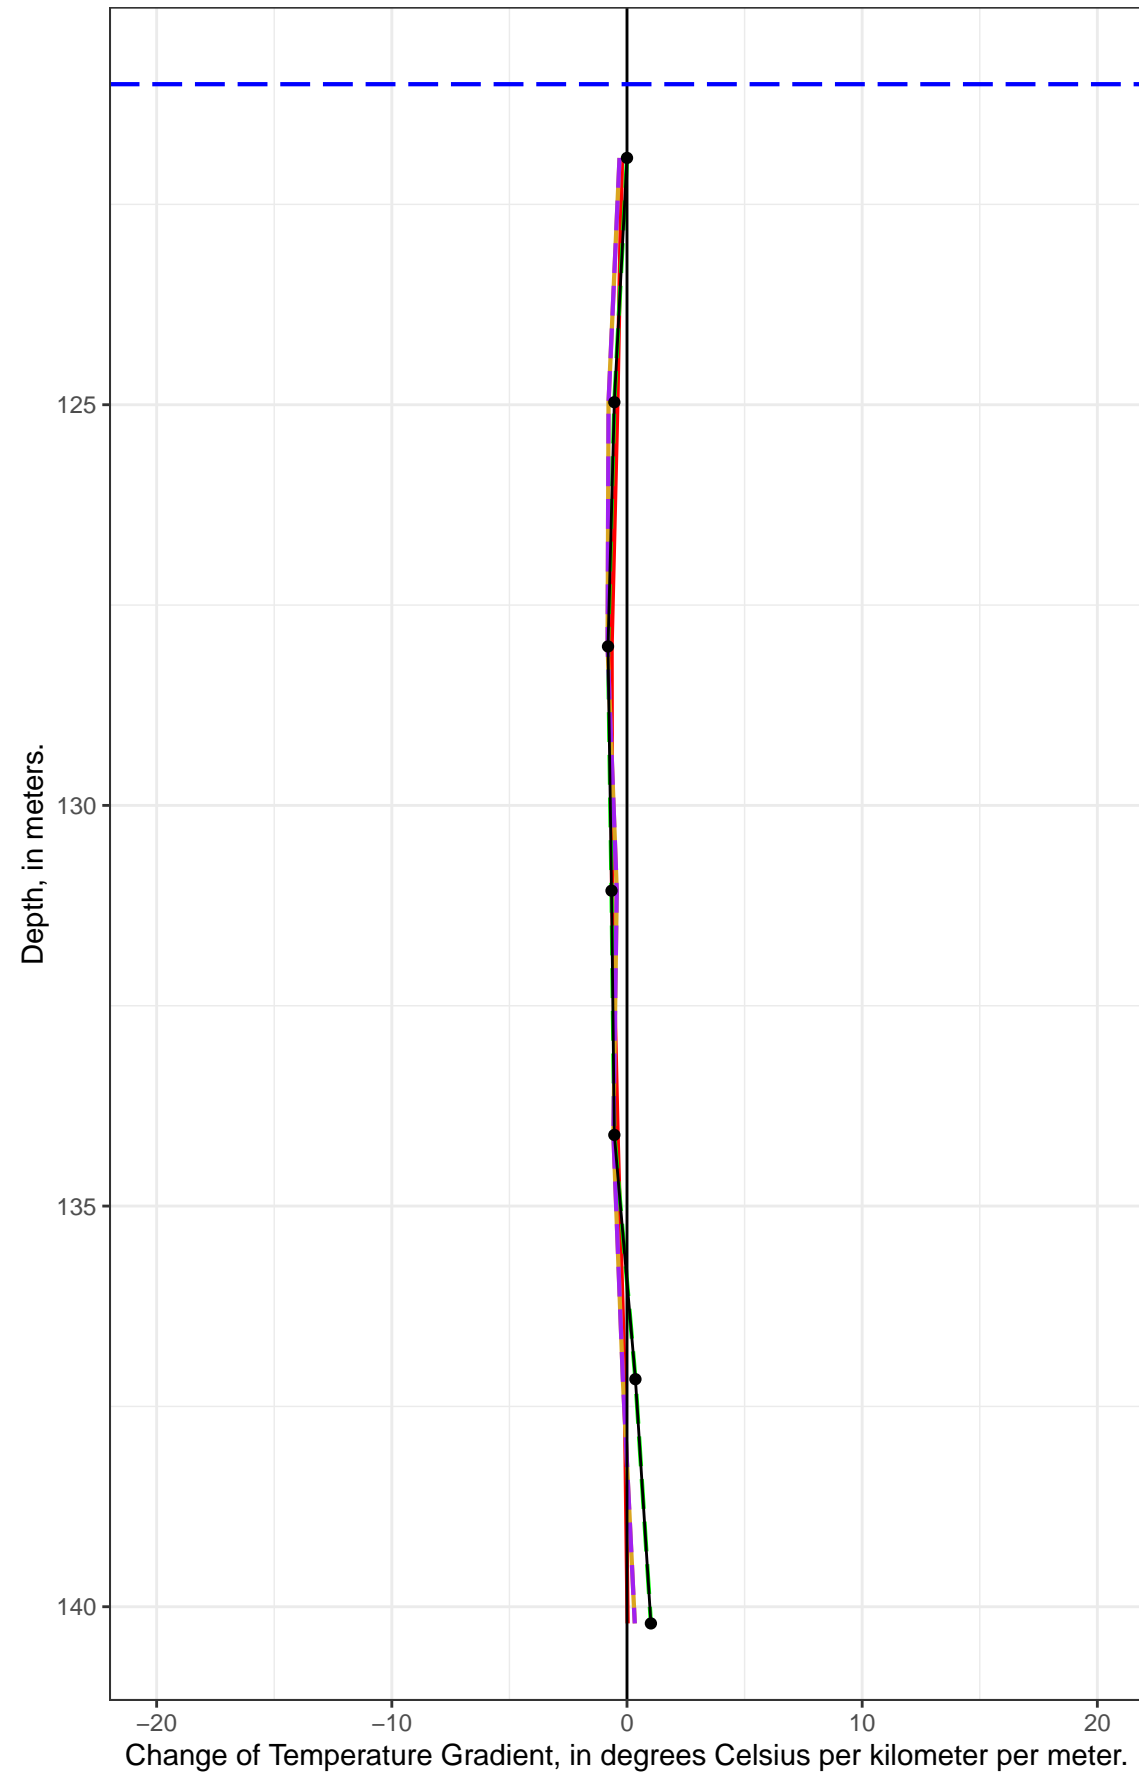

• Data — LOESS (AICC) — LOESS (constant) — LOESS (GCV) — Spline

• Data — LOESS (AICC) — LOESS (constant) — LOESS (GCV) — Spline

• Data — LOESS (AICC) — LOESS (constant) — LOESS (GCV) — Spline

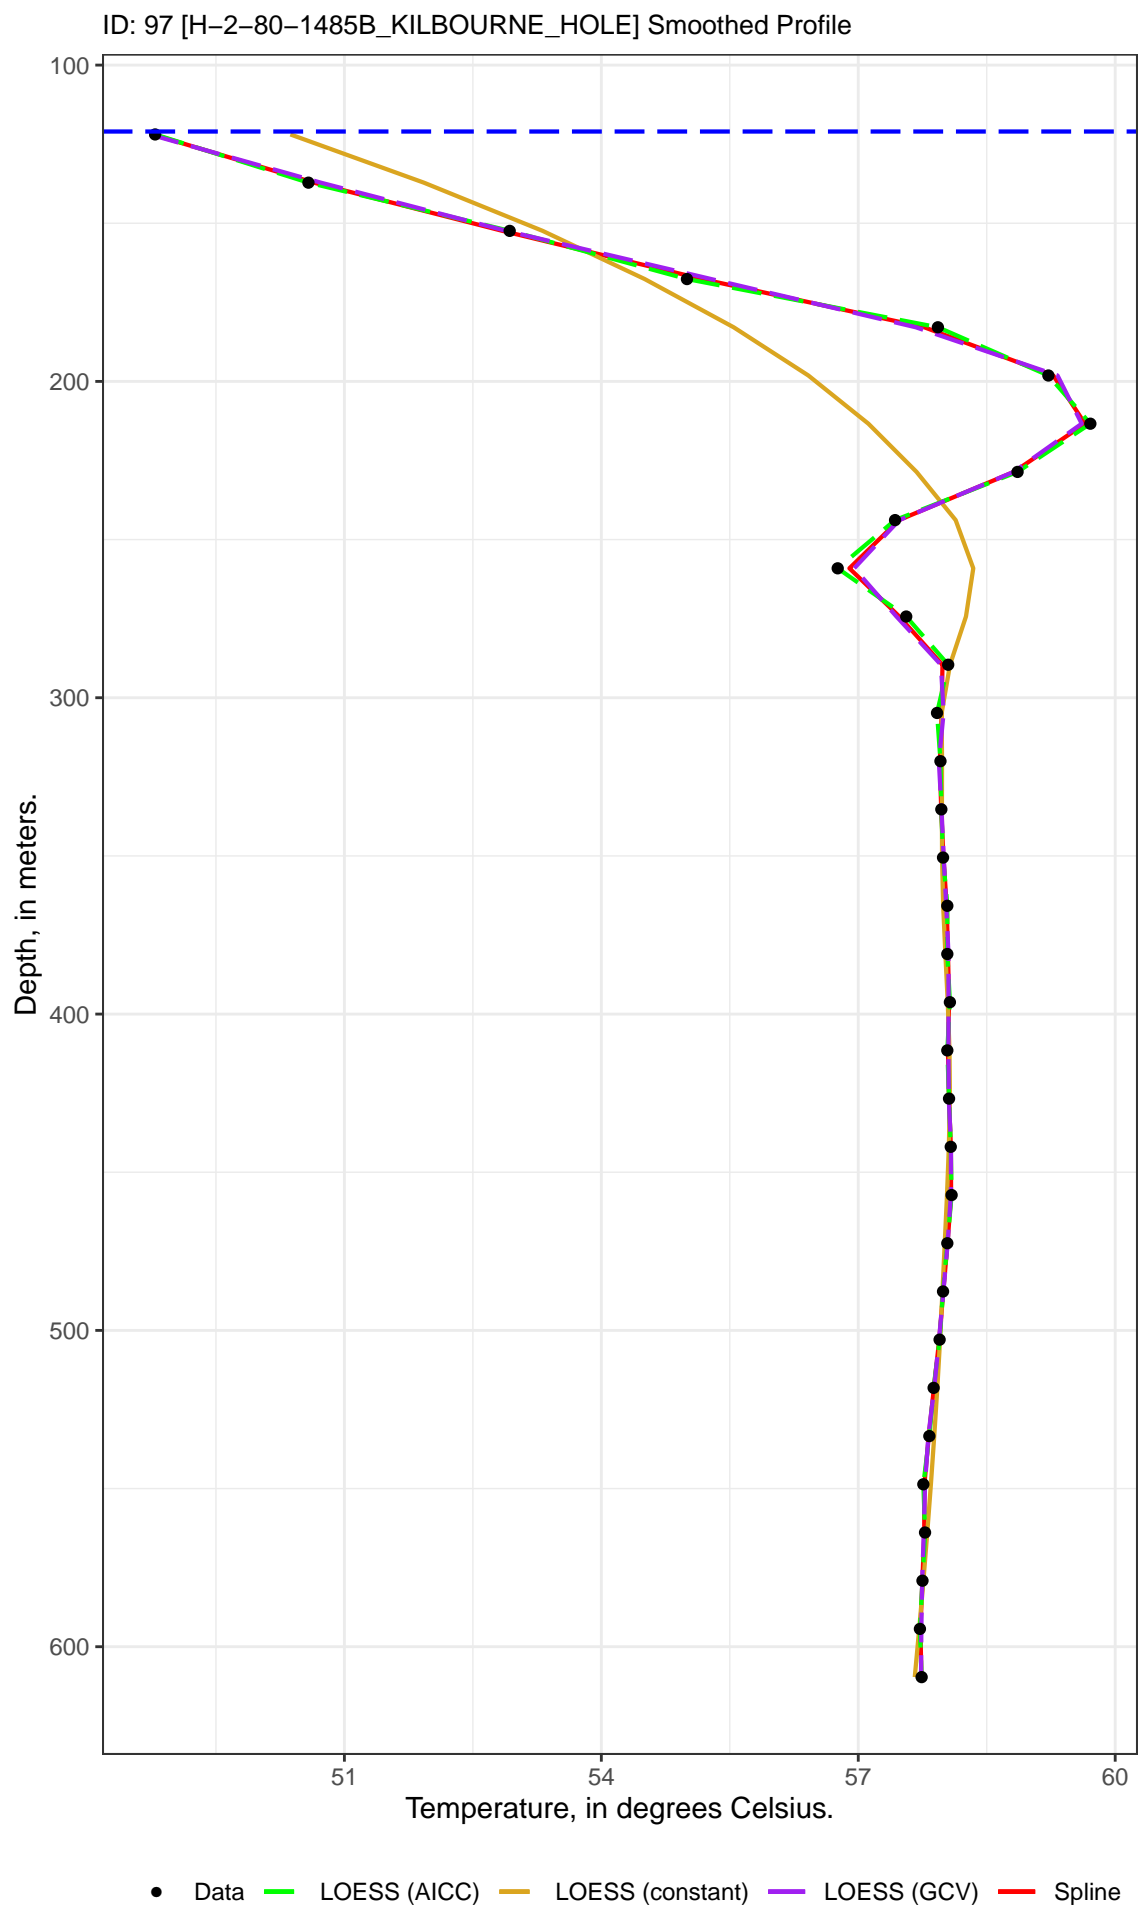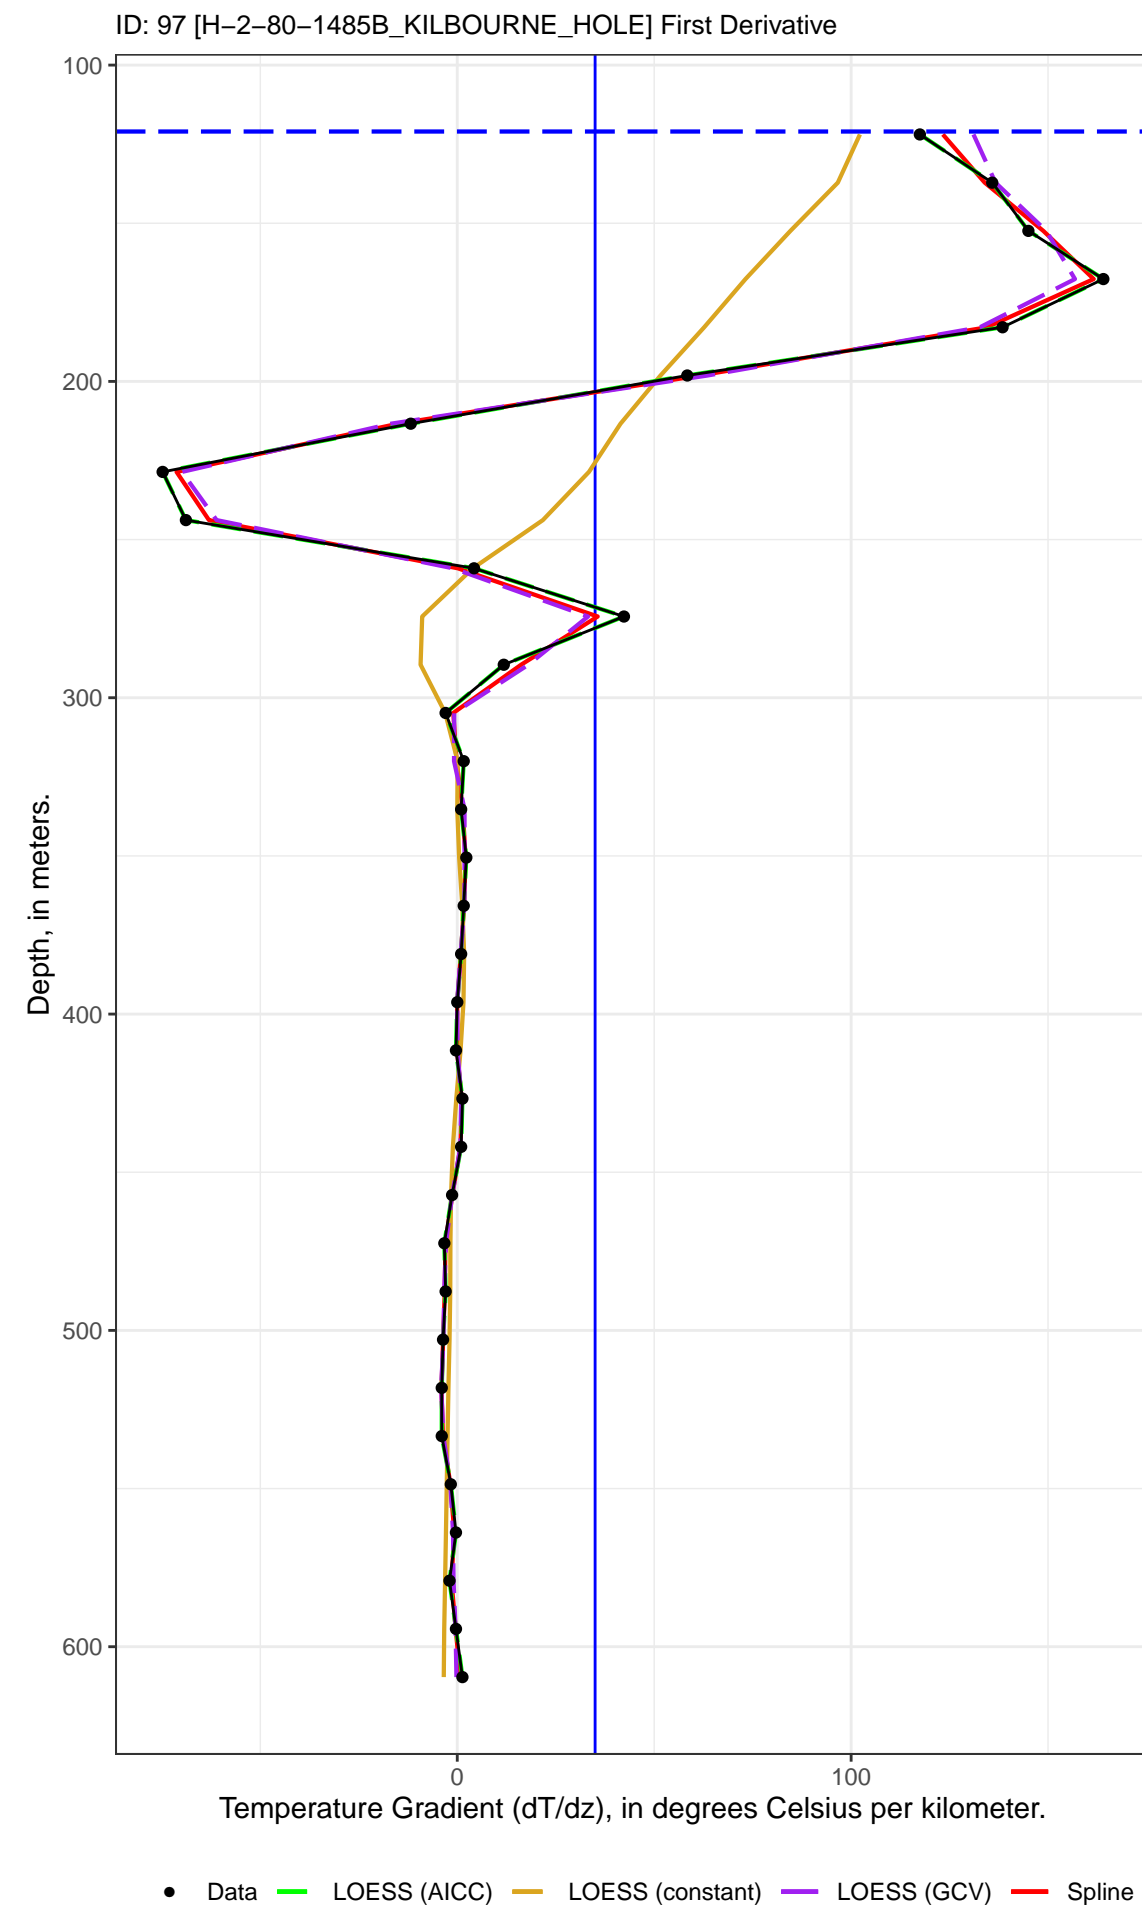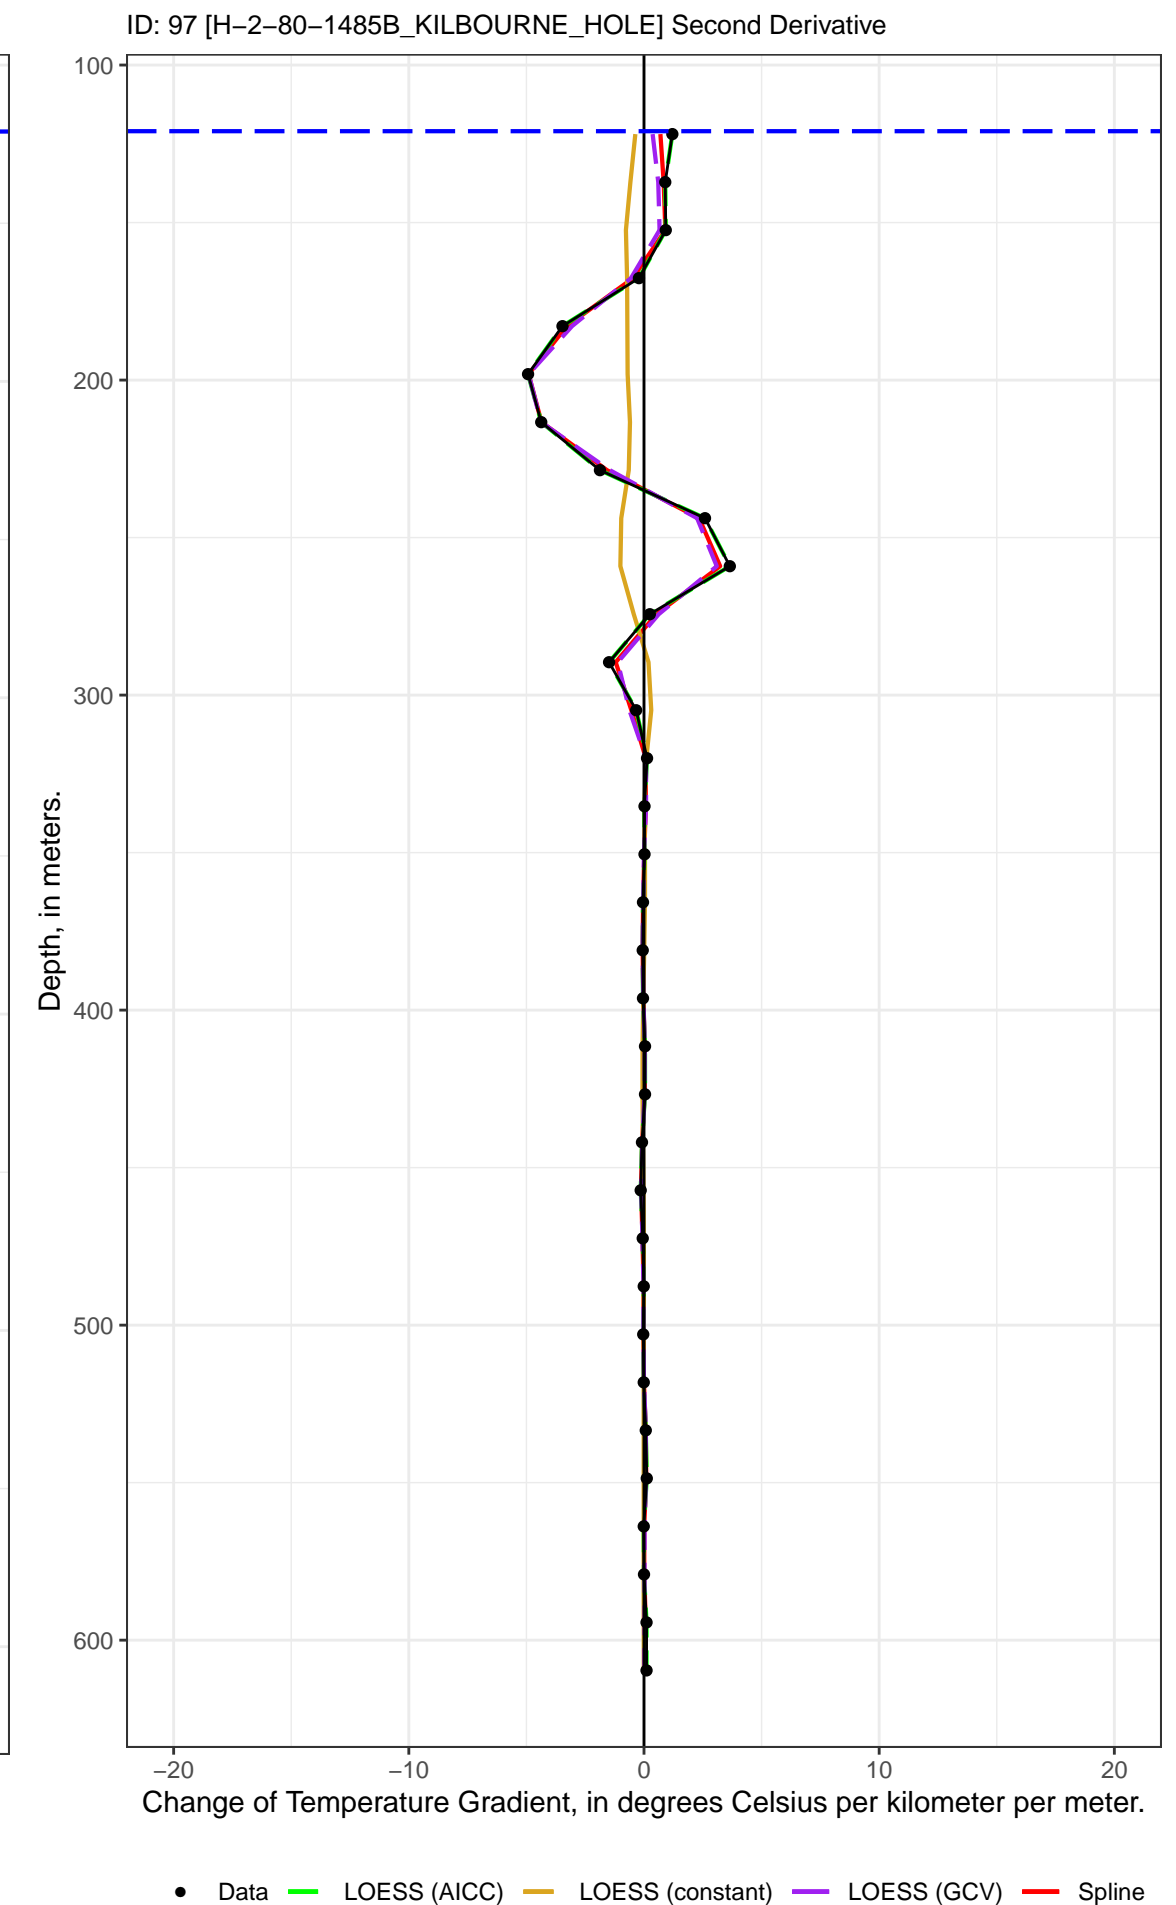

ID: 98 [H-2-80-1488\_KILBOURNE\_HOLE] Smoothed Profile

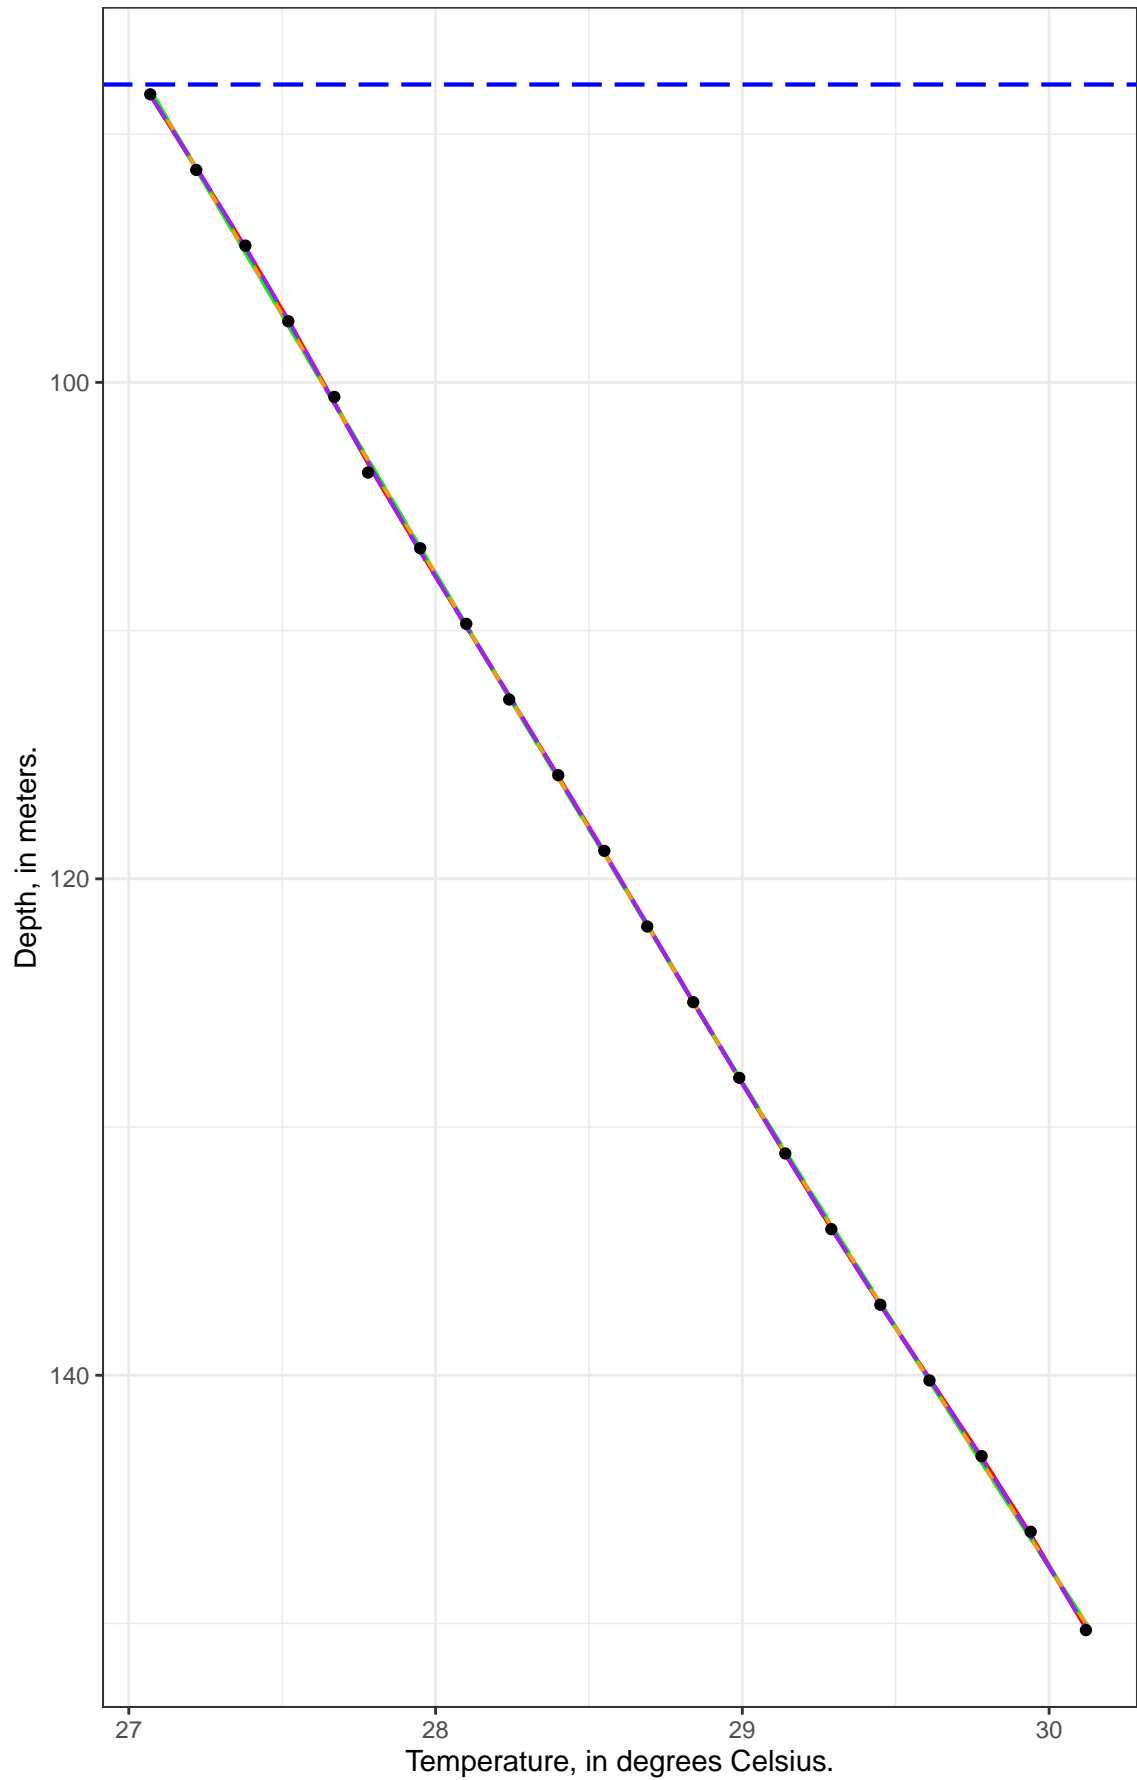

ID: 98 [H-2-80-1488\_KILBOURNE\_HOLE] First Derivative

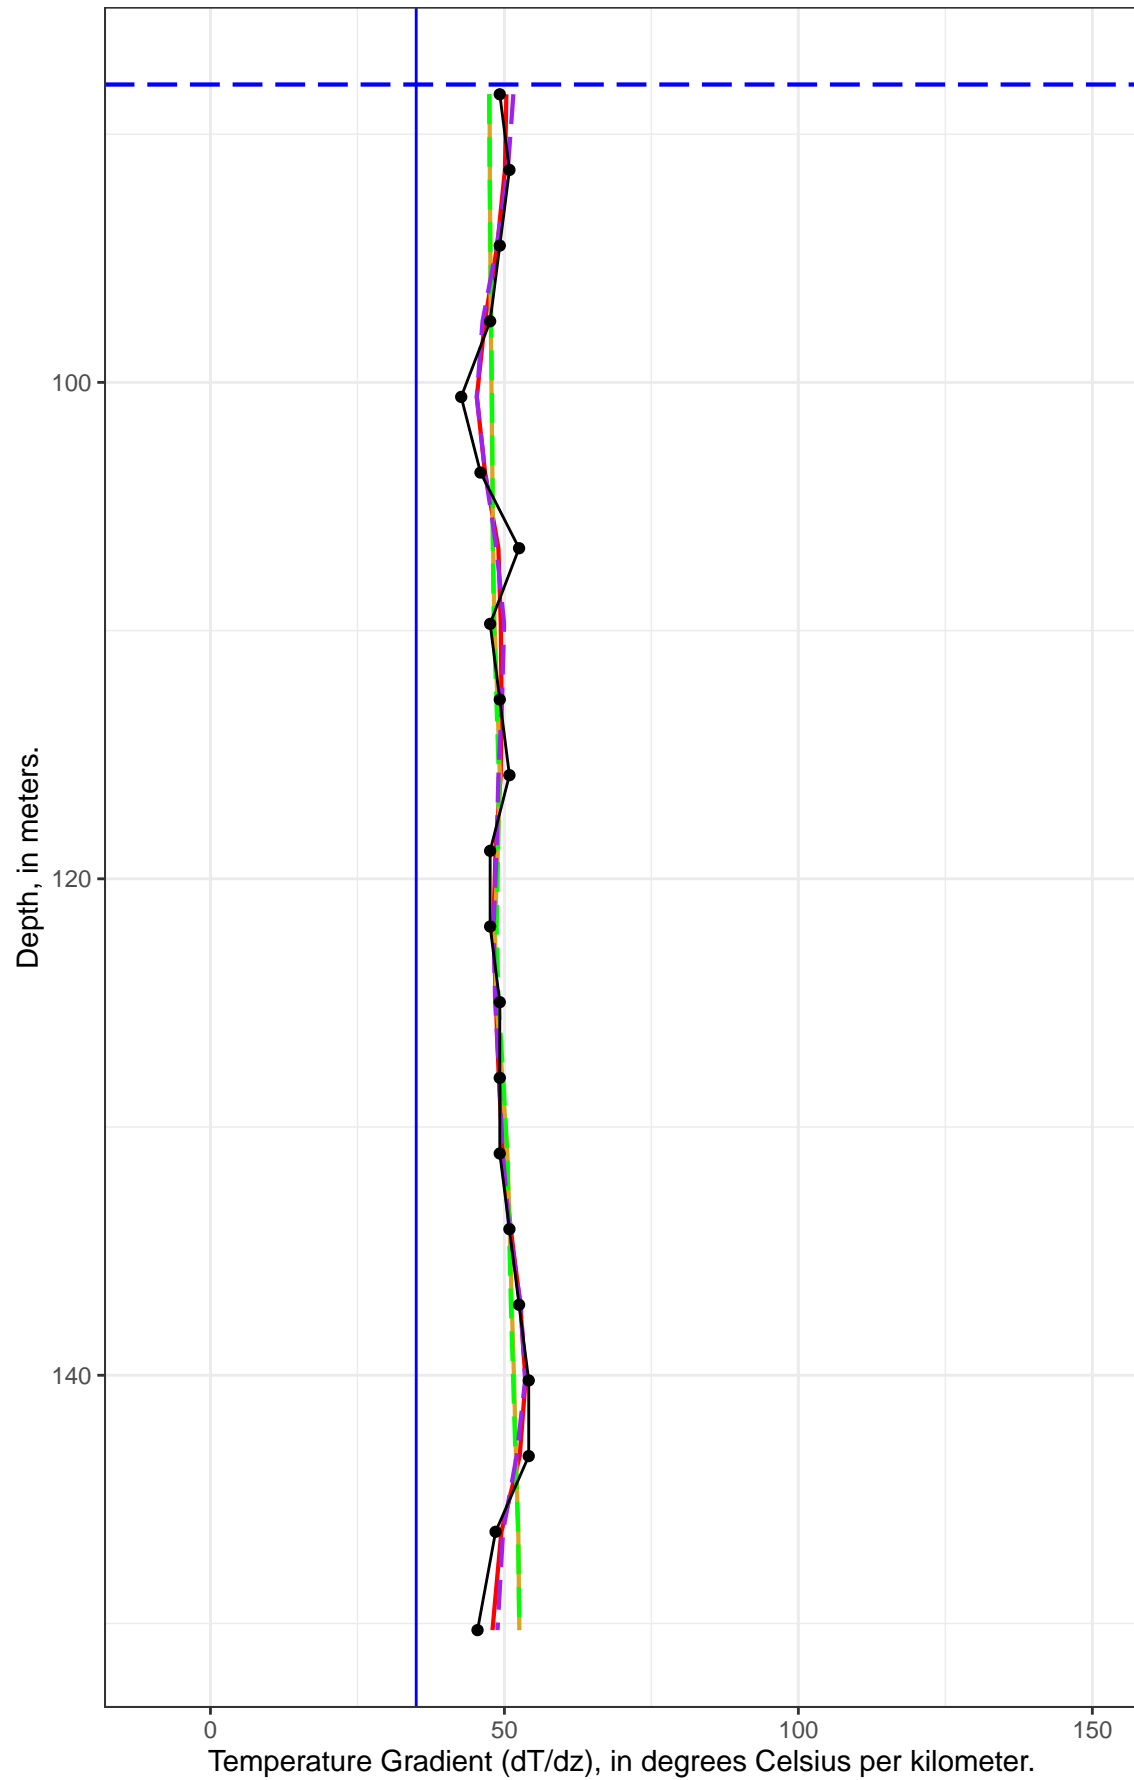

ID: 98 [H-2-80-1488\_KILBOURNE\_HOLE] Second Derivative

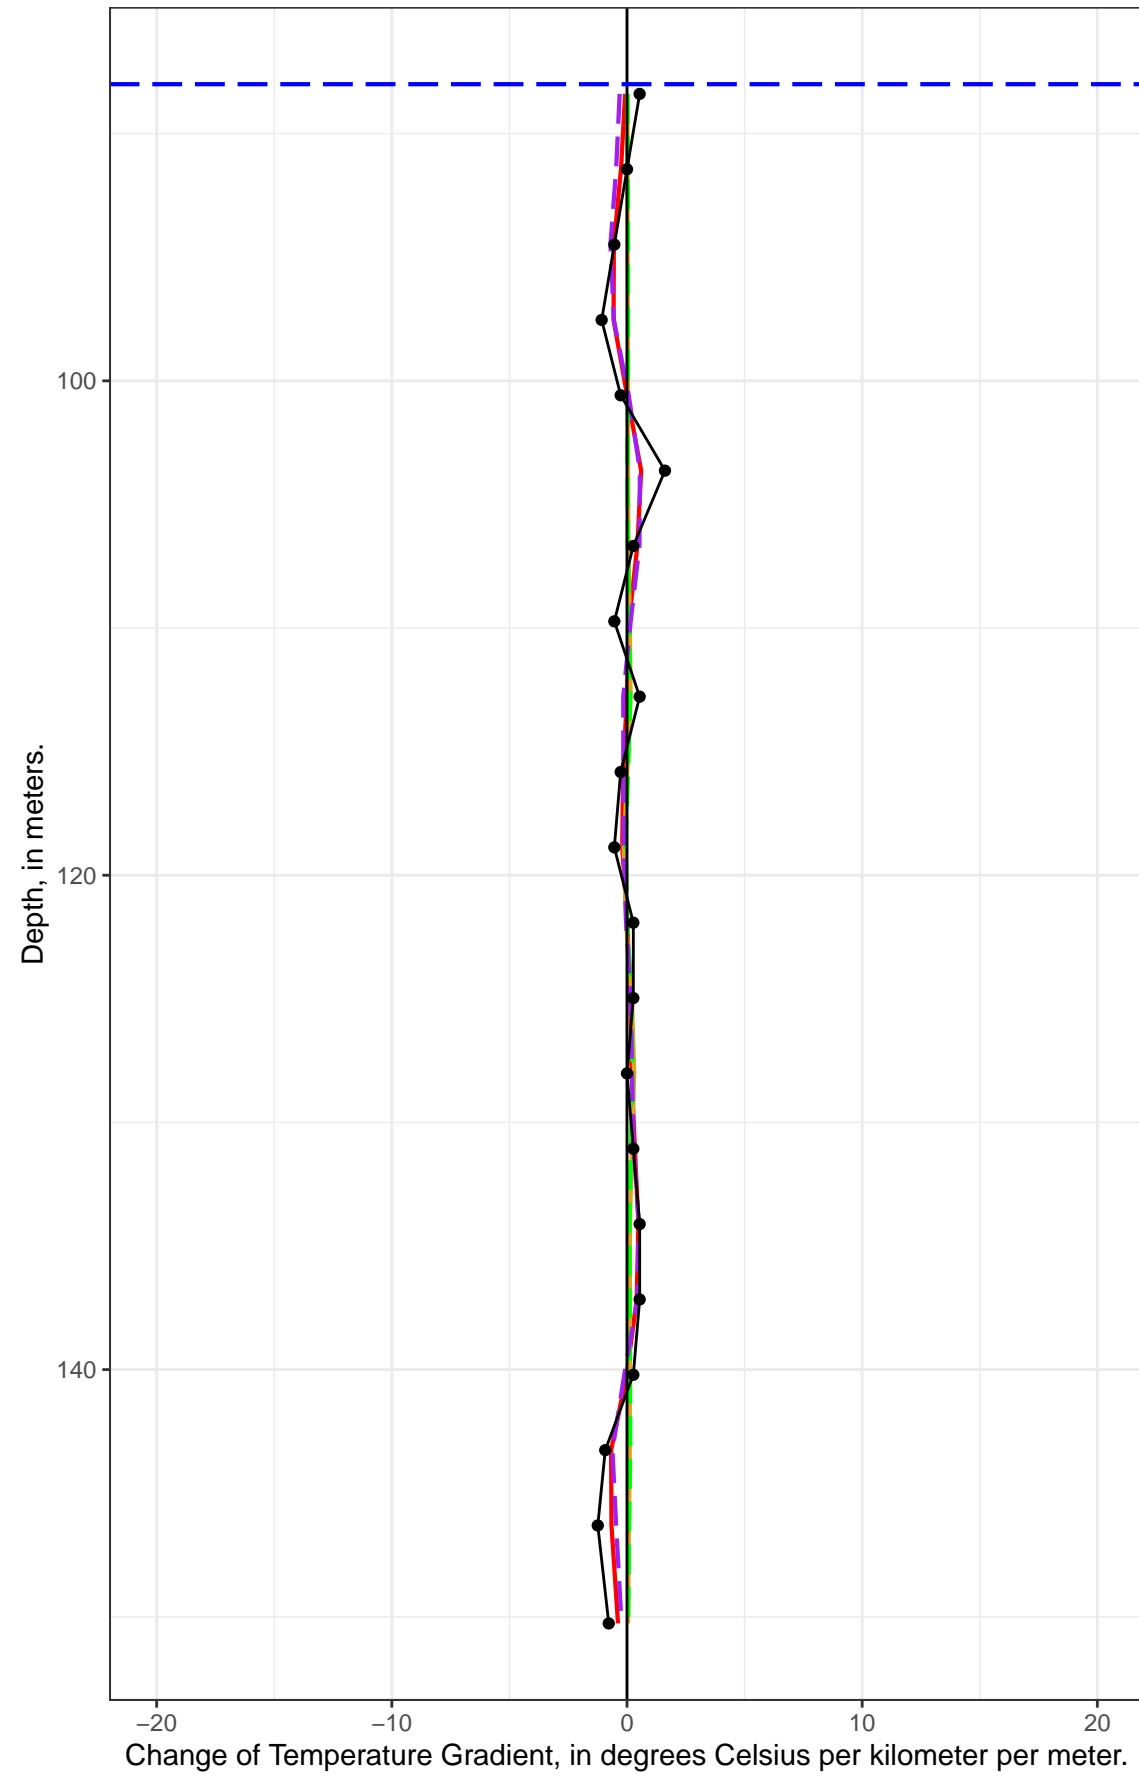

• Data — LOESS (AICC) — LOESS (constant) — LOESS (GCV) — Spline

• Data — LOESS (AICC) — LOESS (constant) — LOESS (GCV) — Spline

• Data — LOESS (AICC) — LOESS (constant) — LOESS (GCV) — Spline

ID: 99 [H-2-80-1495\_KILBOURNE\_HOLE] Smoothed Profile

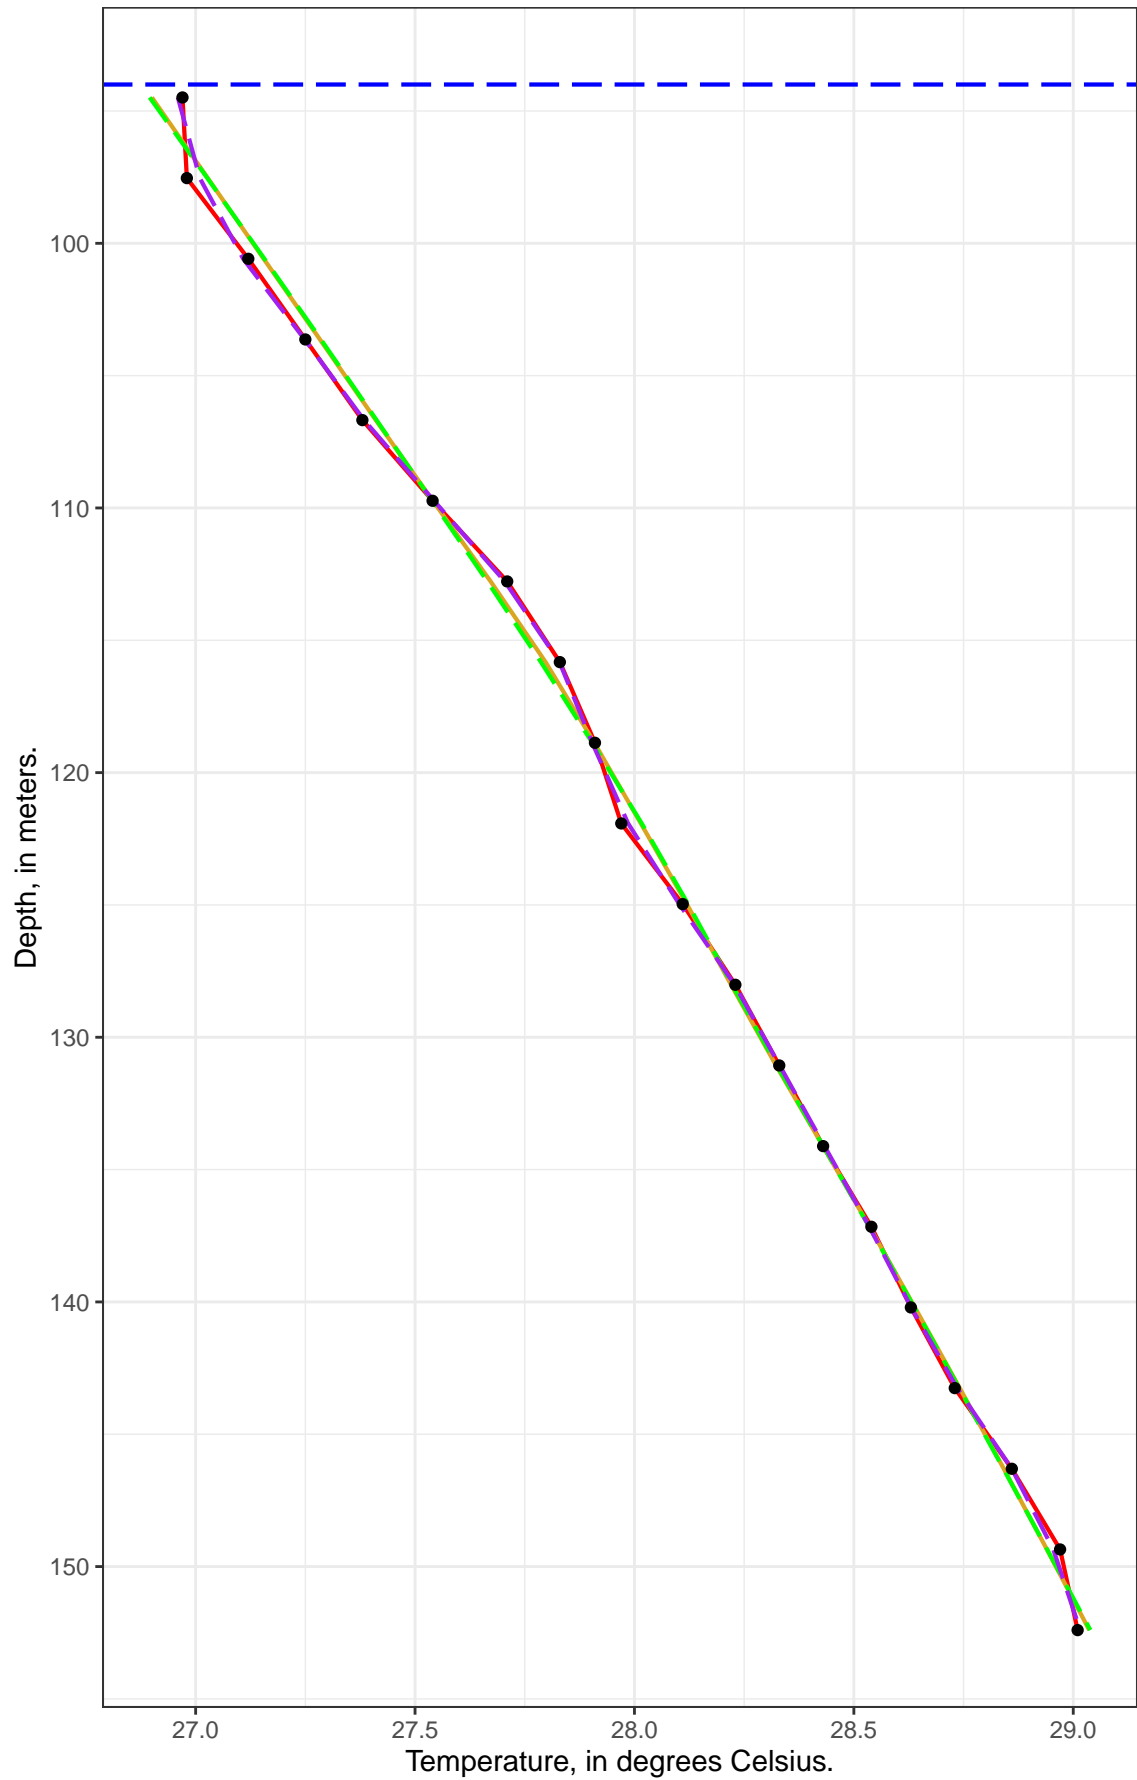

ID: 99 [H-2-80-1495\_KILBOURNE\_HOLE] First Derivative

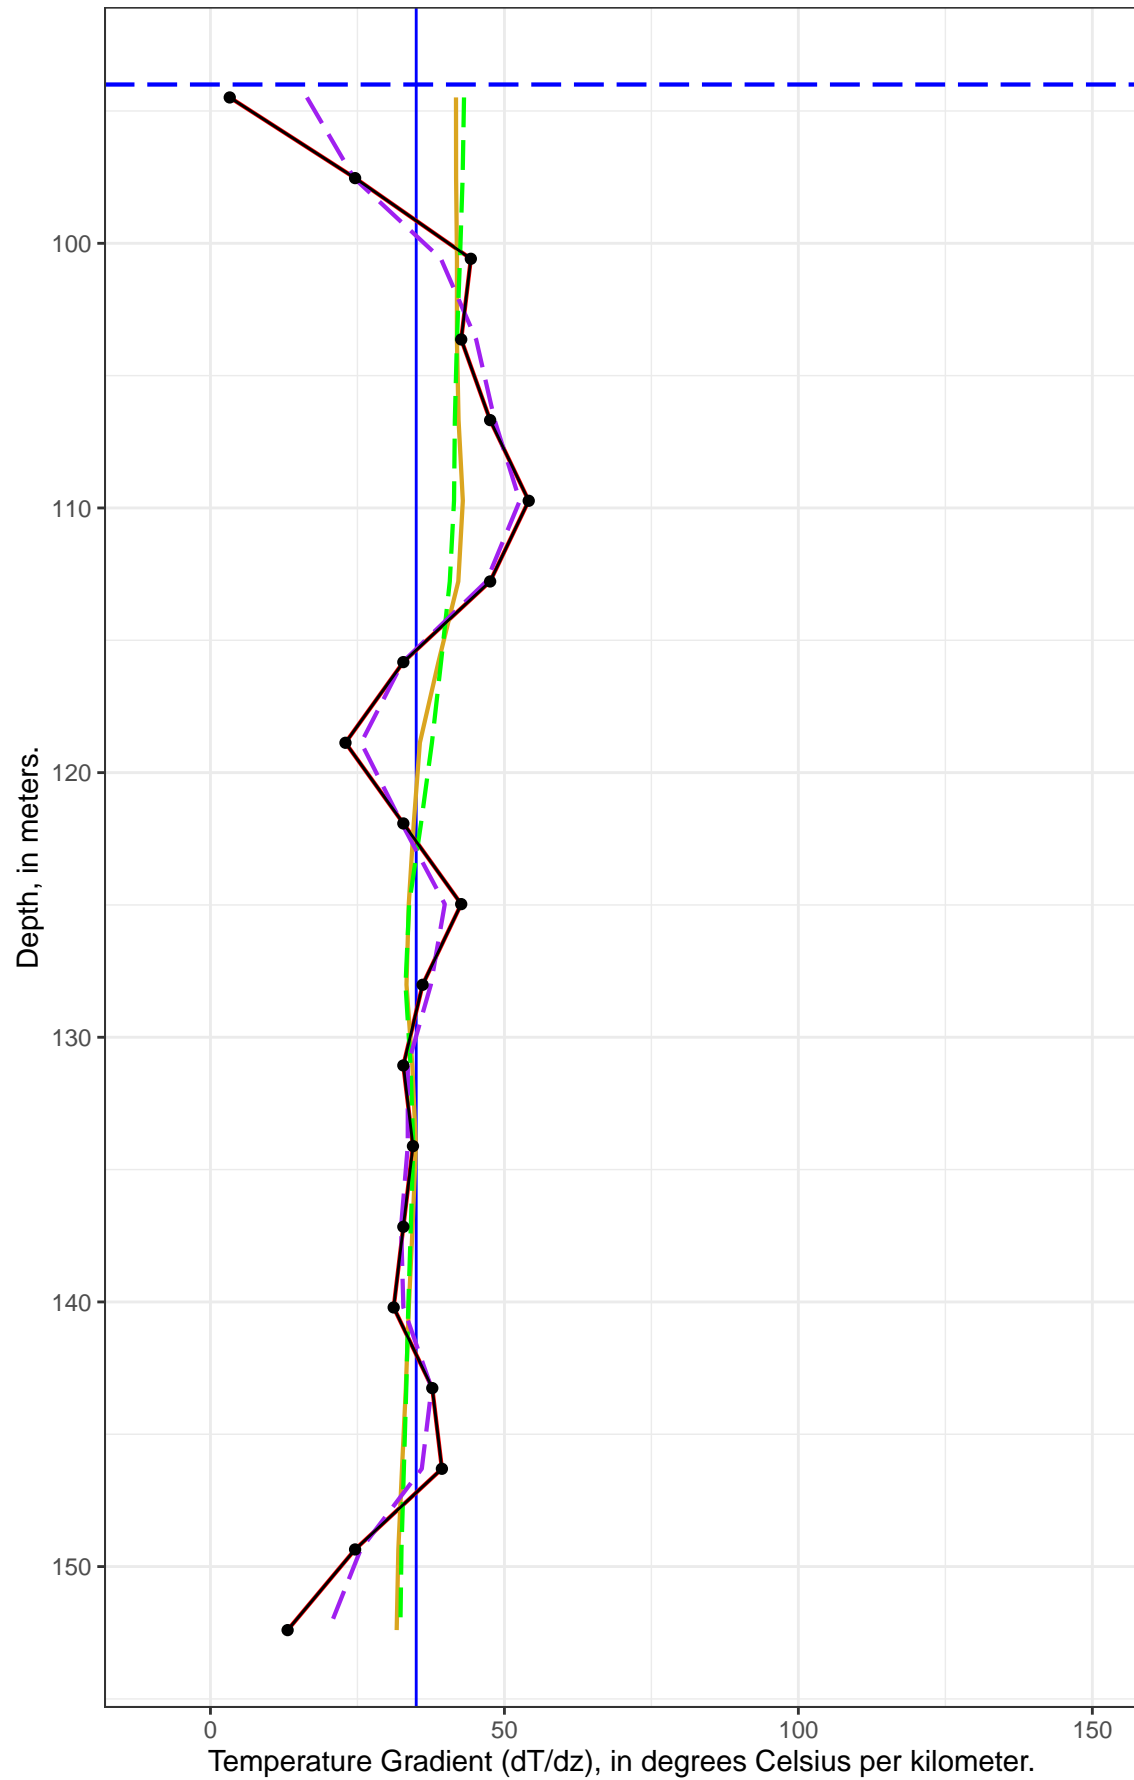

ID: 99 [H-2-80-1495\_KILBOURNE\_HOLE] Second Derivative

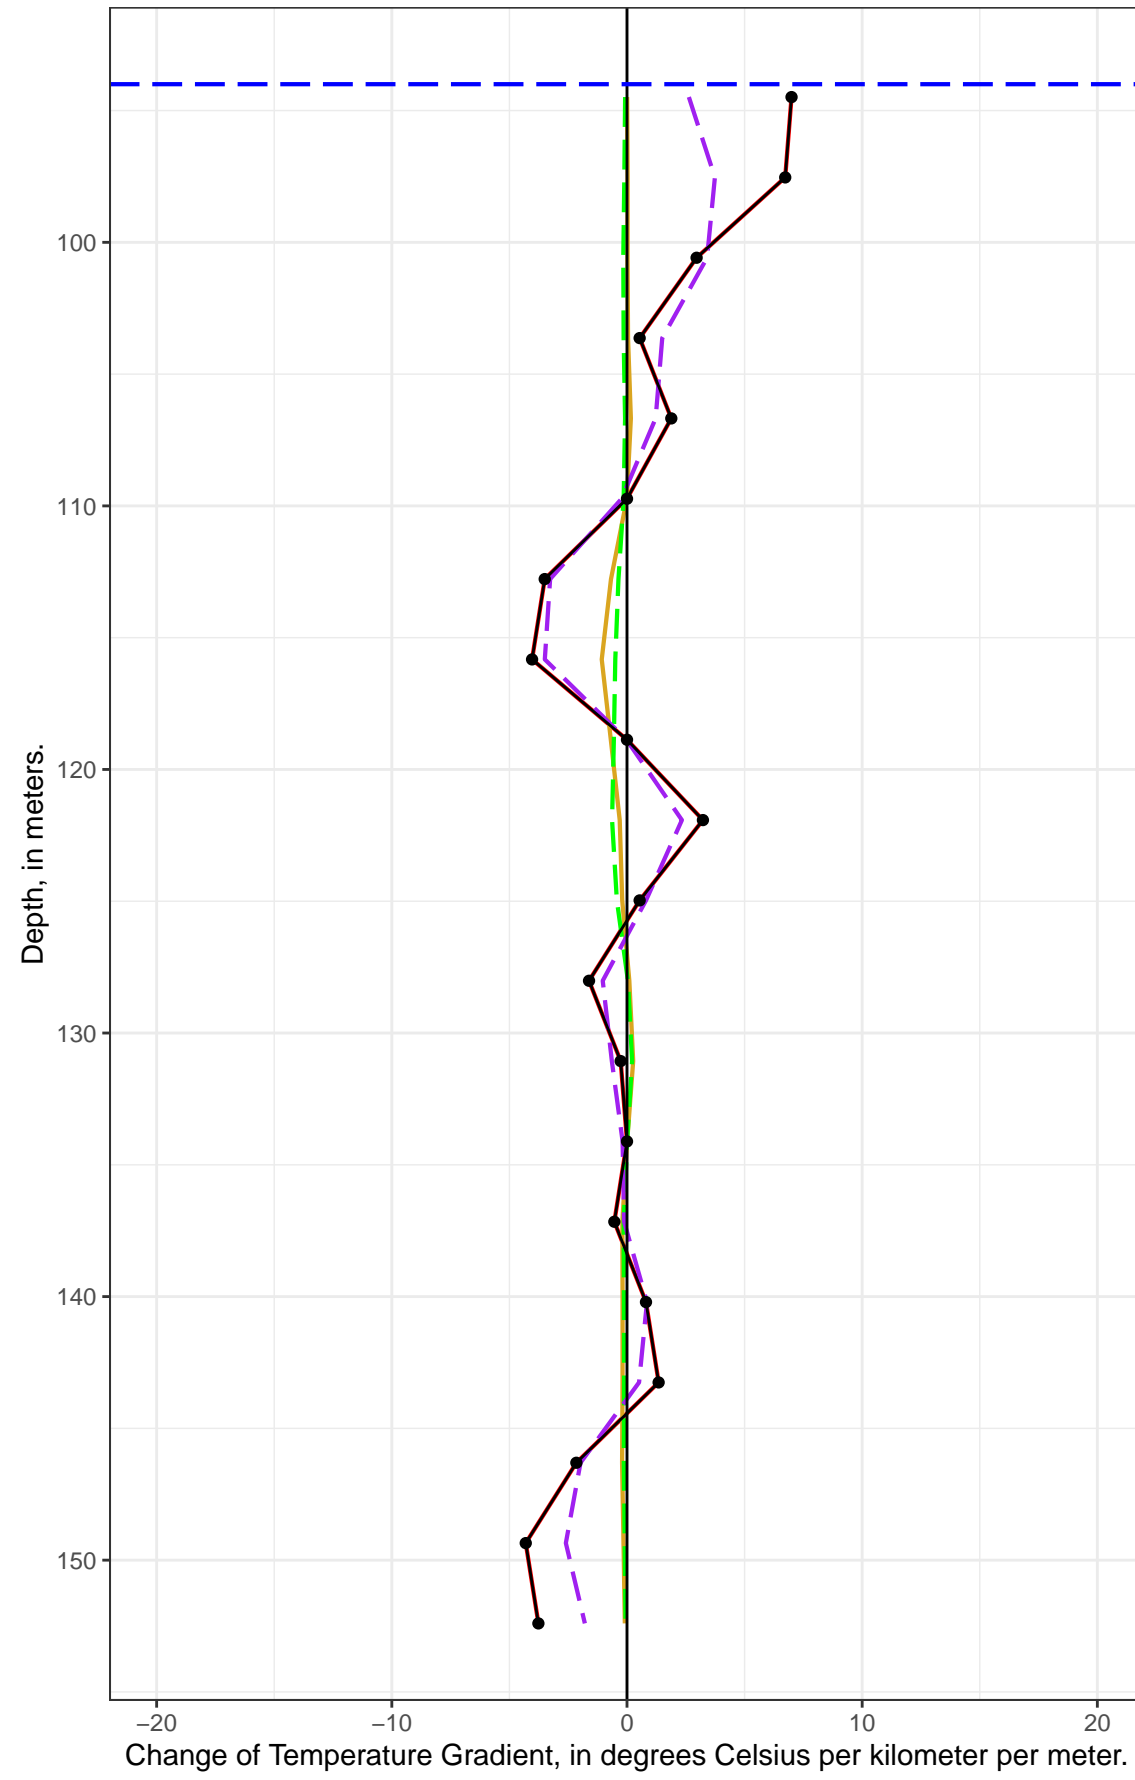

• Data — LOESS (AICC) — LOESS (constant) — LOESS (GCV) — Spline

• Data — LOESS (AICC) — LOESS (constant) — LOESS (GCV) — Spline

• Data — LOESS (AICC) — LOESS (constant) — LOESS (GCV) — Spline

ID: 105 [H-22-76-15\_KILBOURNE\_HOLE] Smoothed Profile

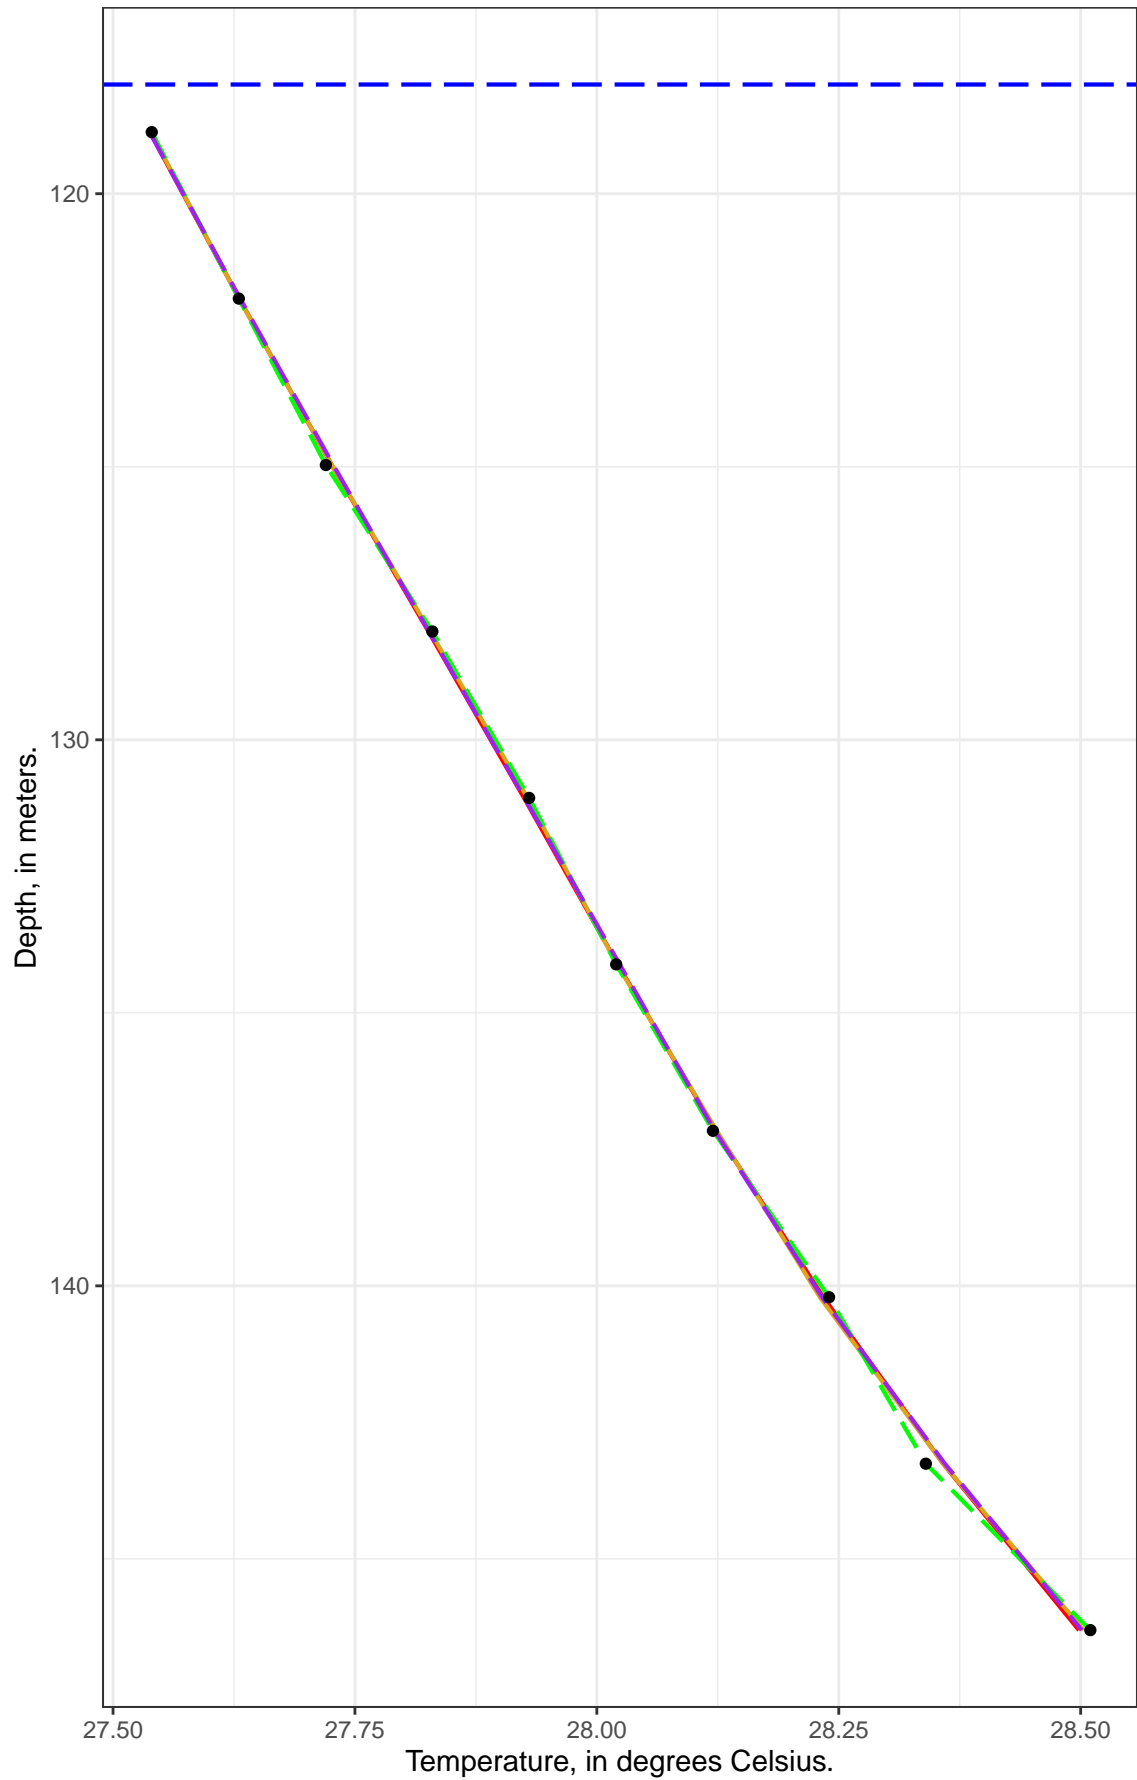

ID: 105 [H-22-76-15\_KILBOURNE\_HOLE] First Derivative

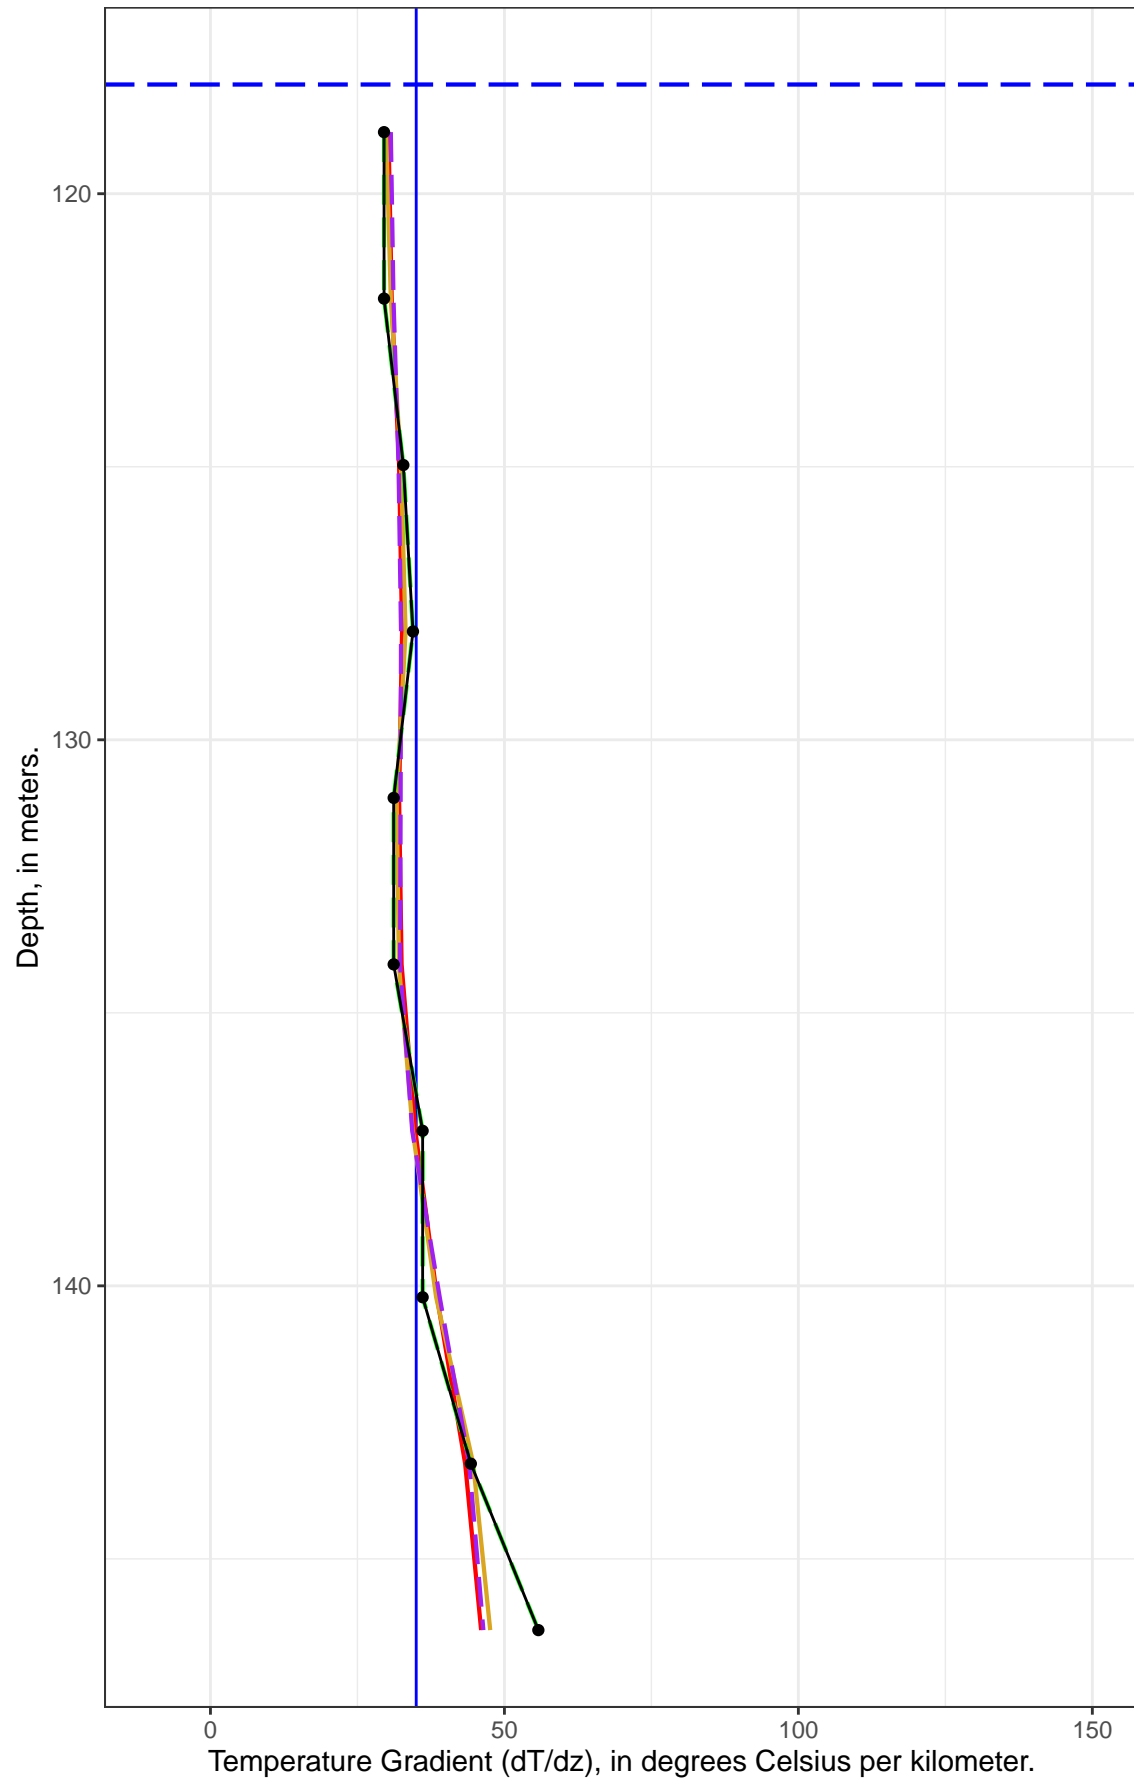

ID: 105 [H-22-76-15\_KILBOURNE\_HOLE] Second Derivative

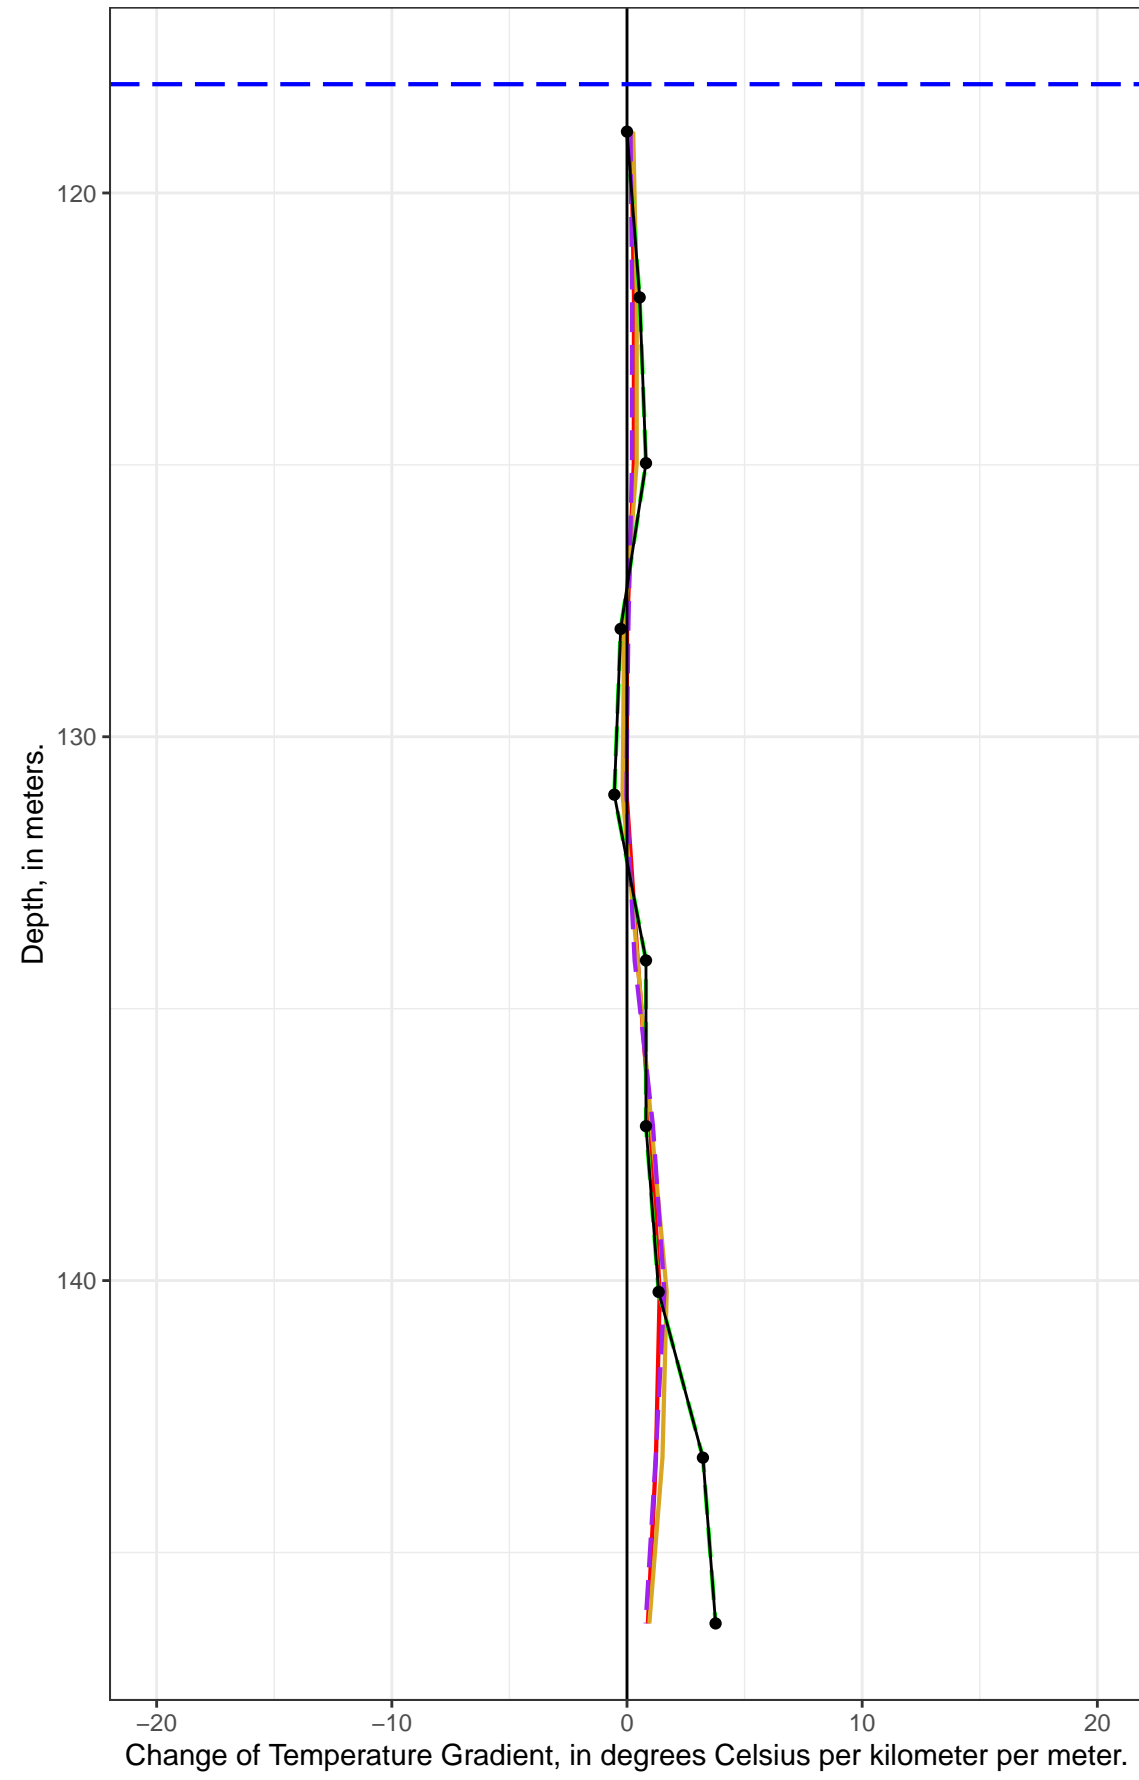

• Data • LOESS (AICC) • LOESS (constant) • LOESS (GCV) • Spline

• Data • LOESS (AICC) • LOESS (constant) • LOESS (GCV) • Spline

• Data • LOESS (AICC) • LOESS (constant) • LOESS (GCV) • Spline

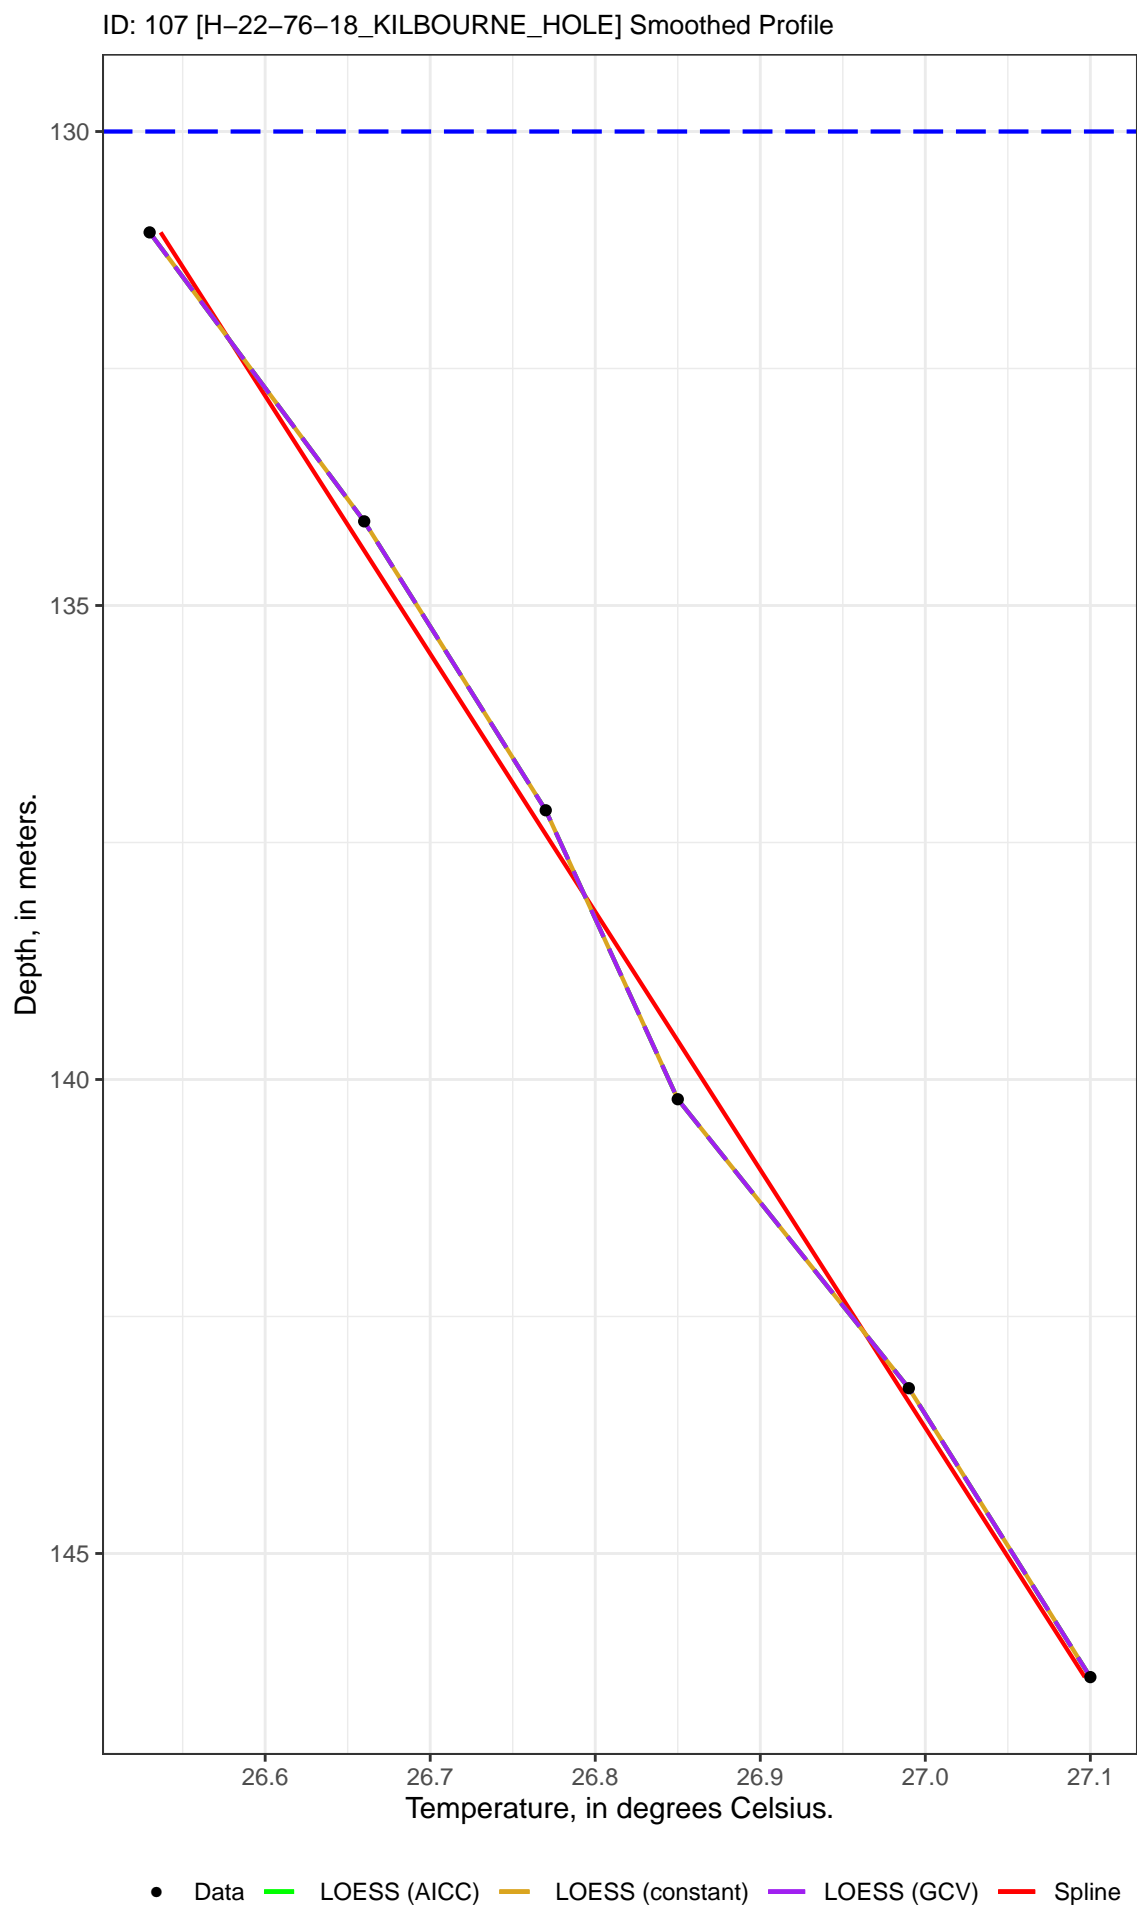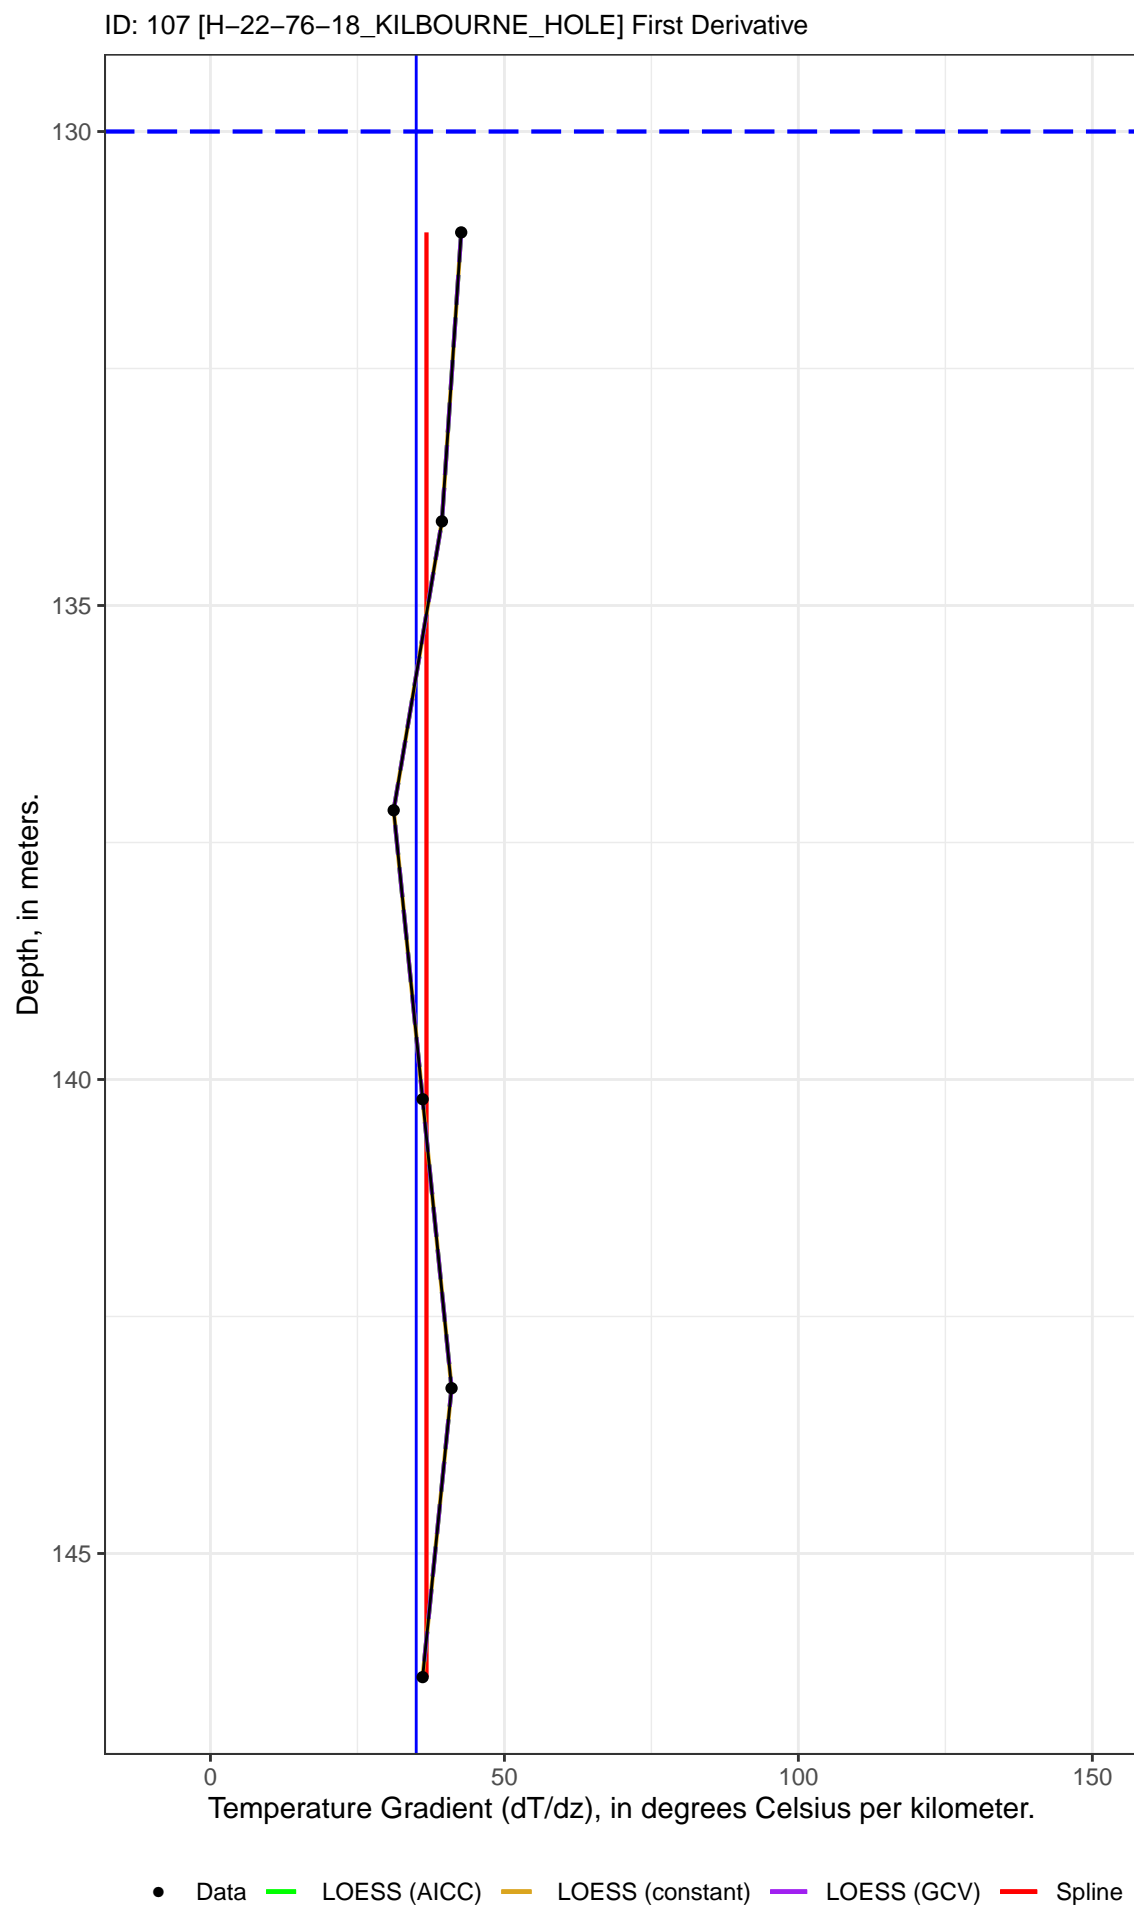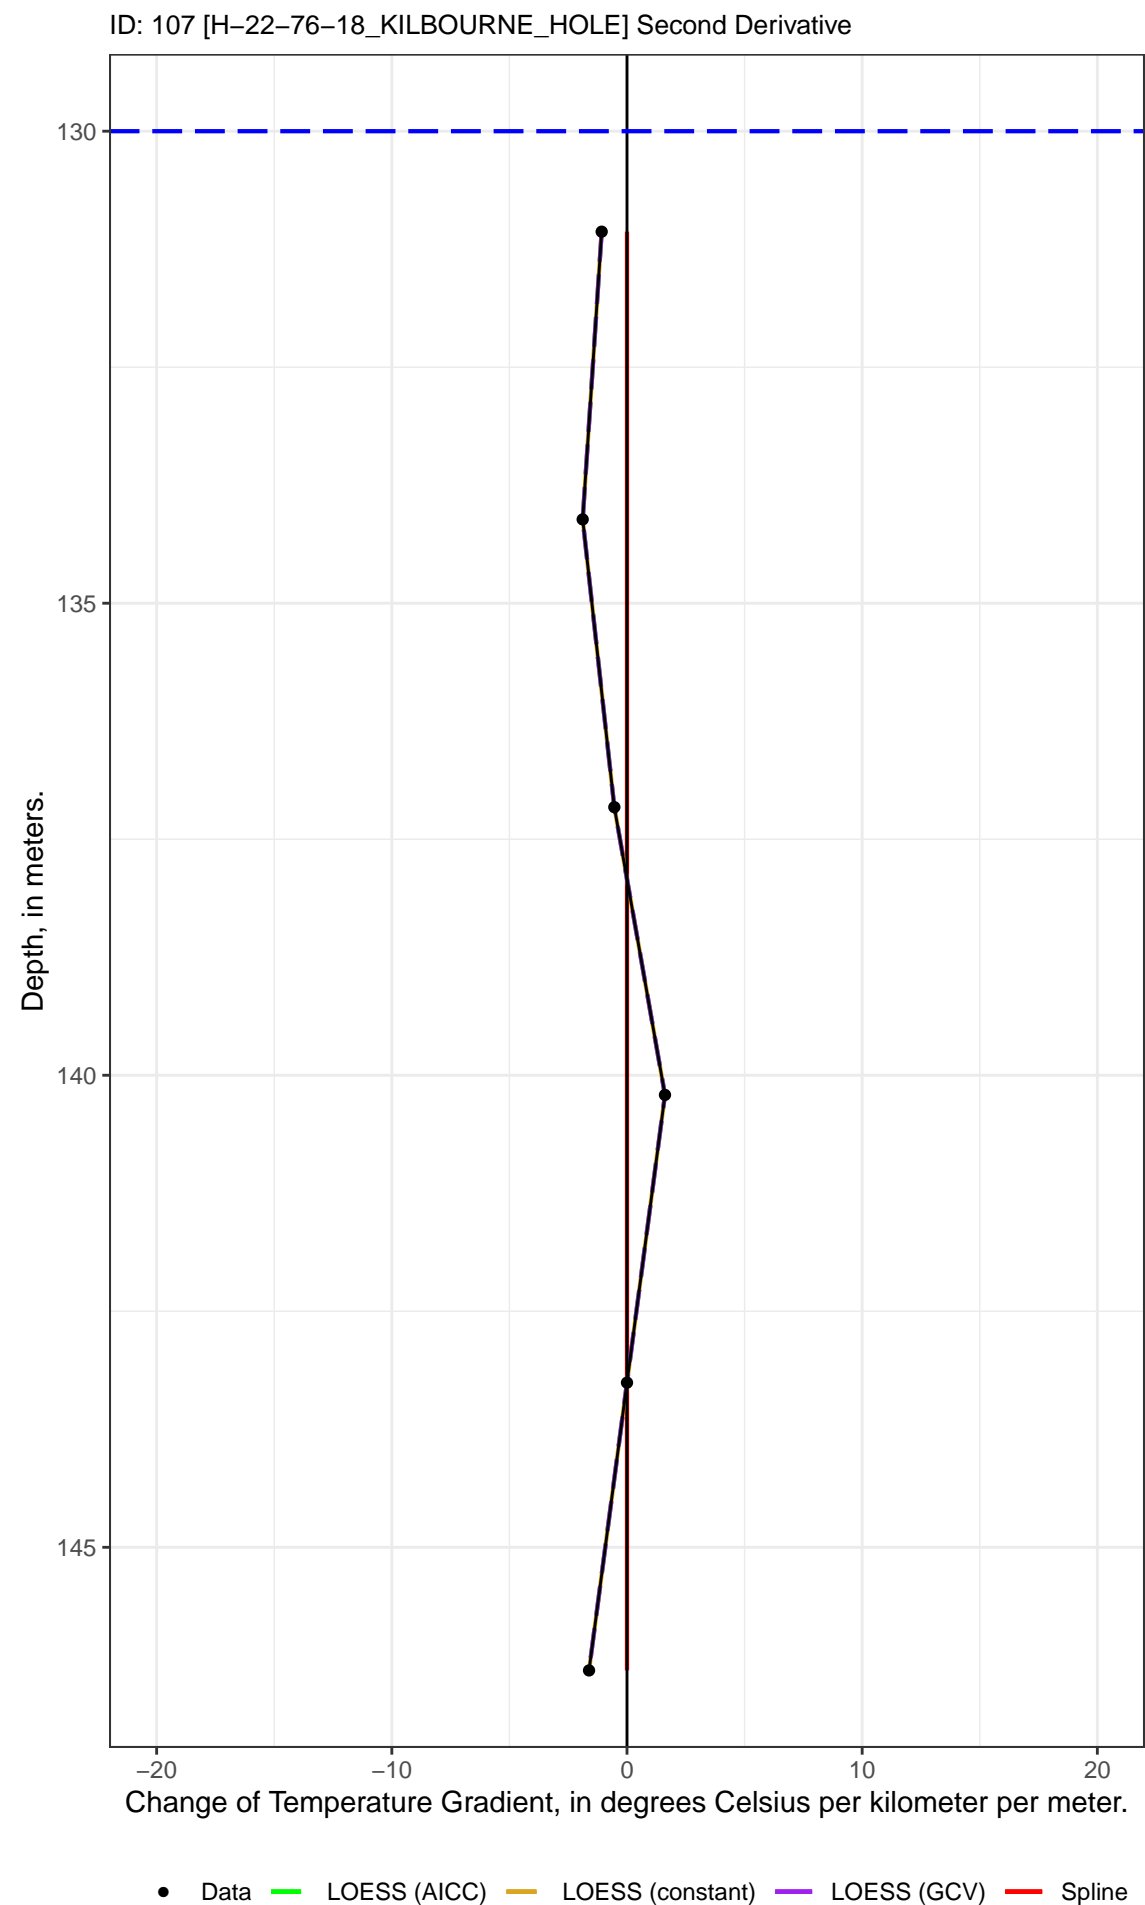



ID: 110 [H-22-76-20\_KILBOURNE\_HOLE] Smoothed Profile

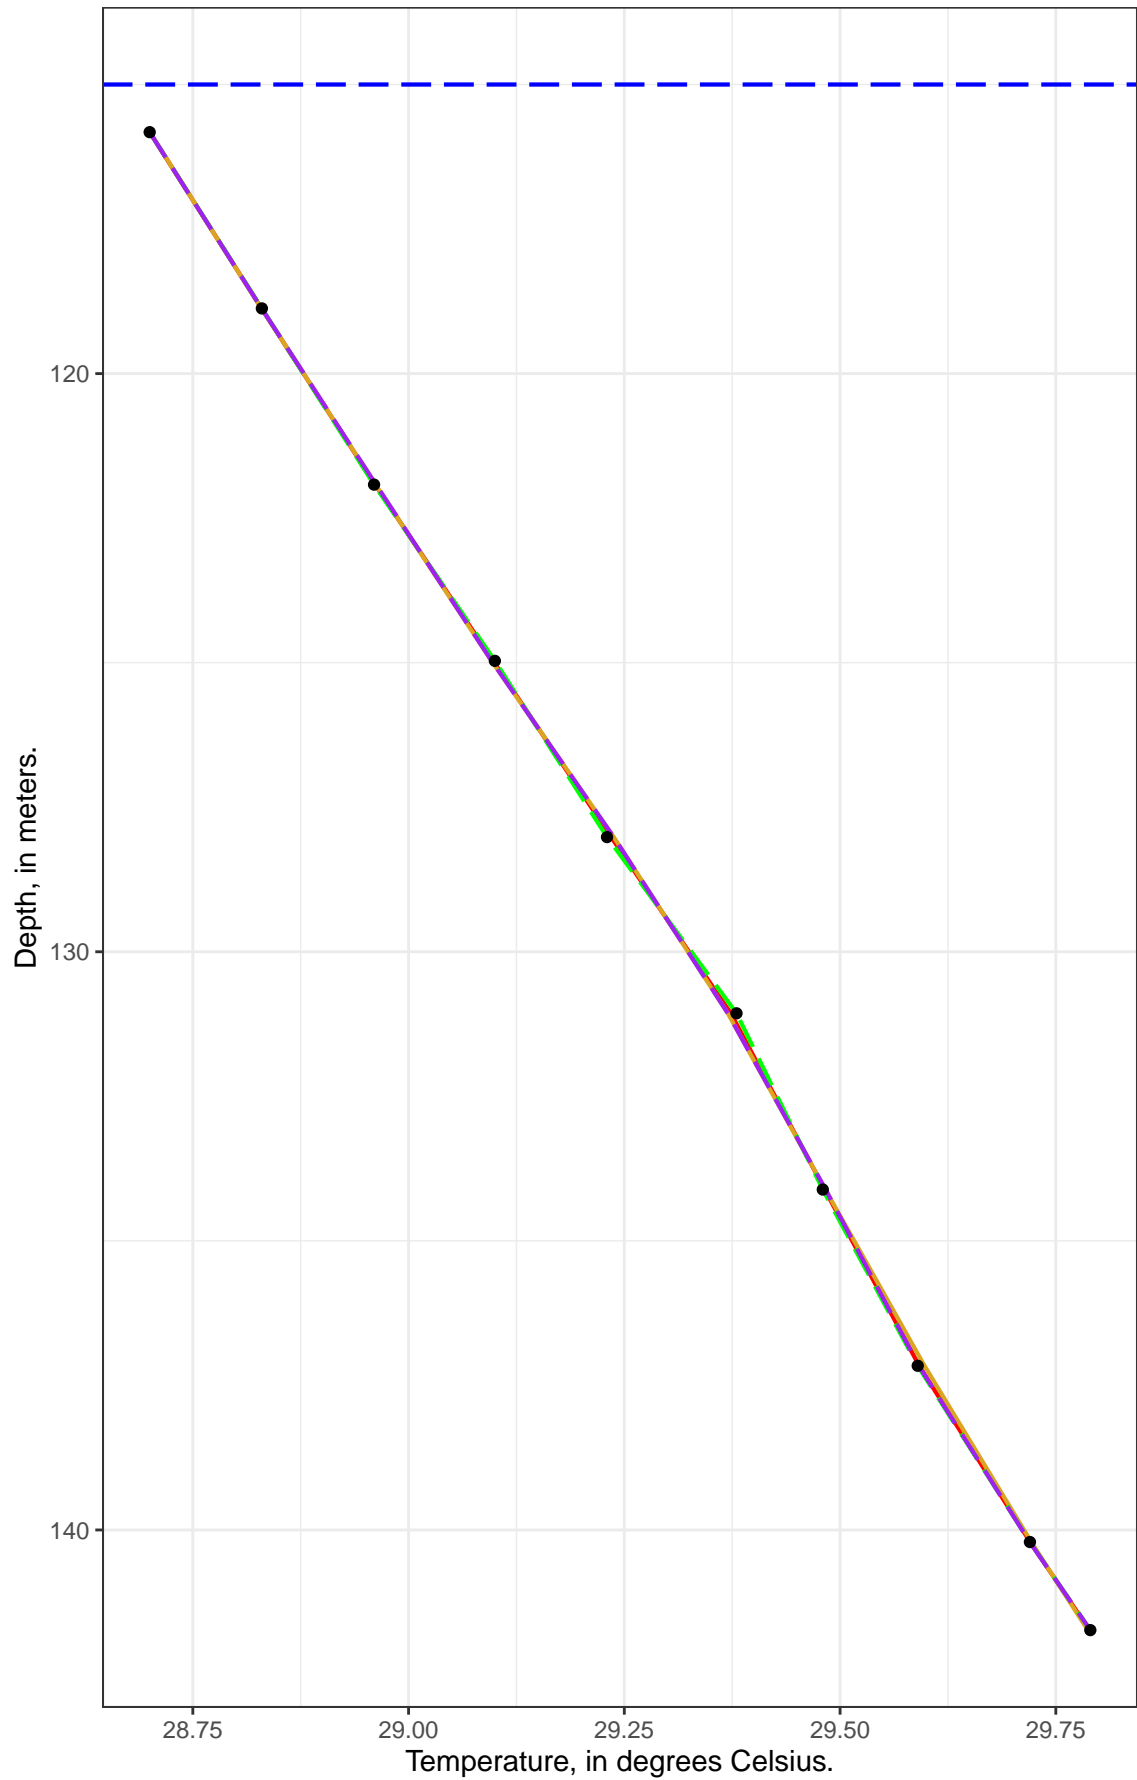

ID: 110 [H-22-76-20\_KILBOURNE\_HOLE] First Derivative

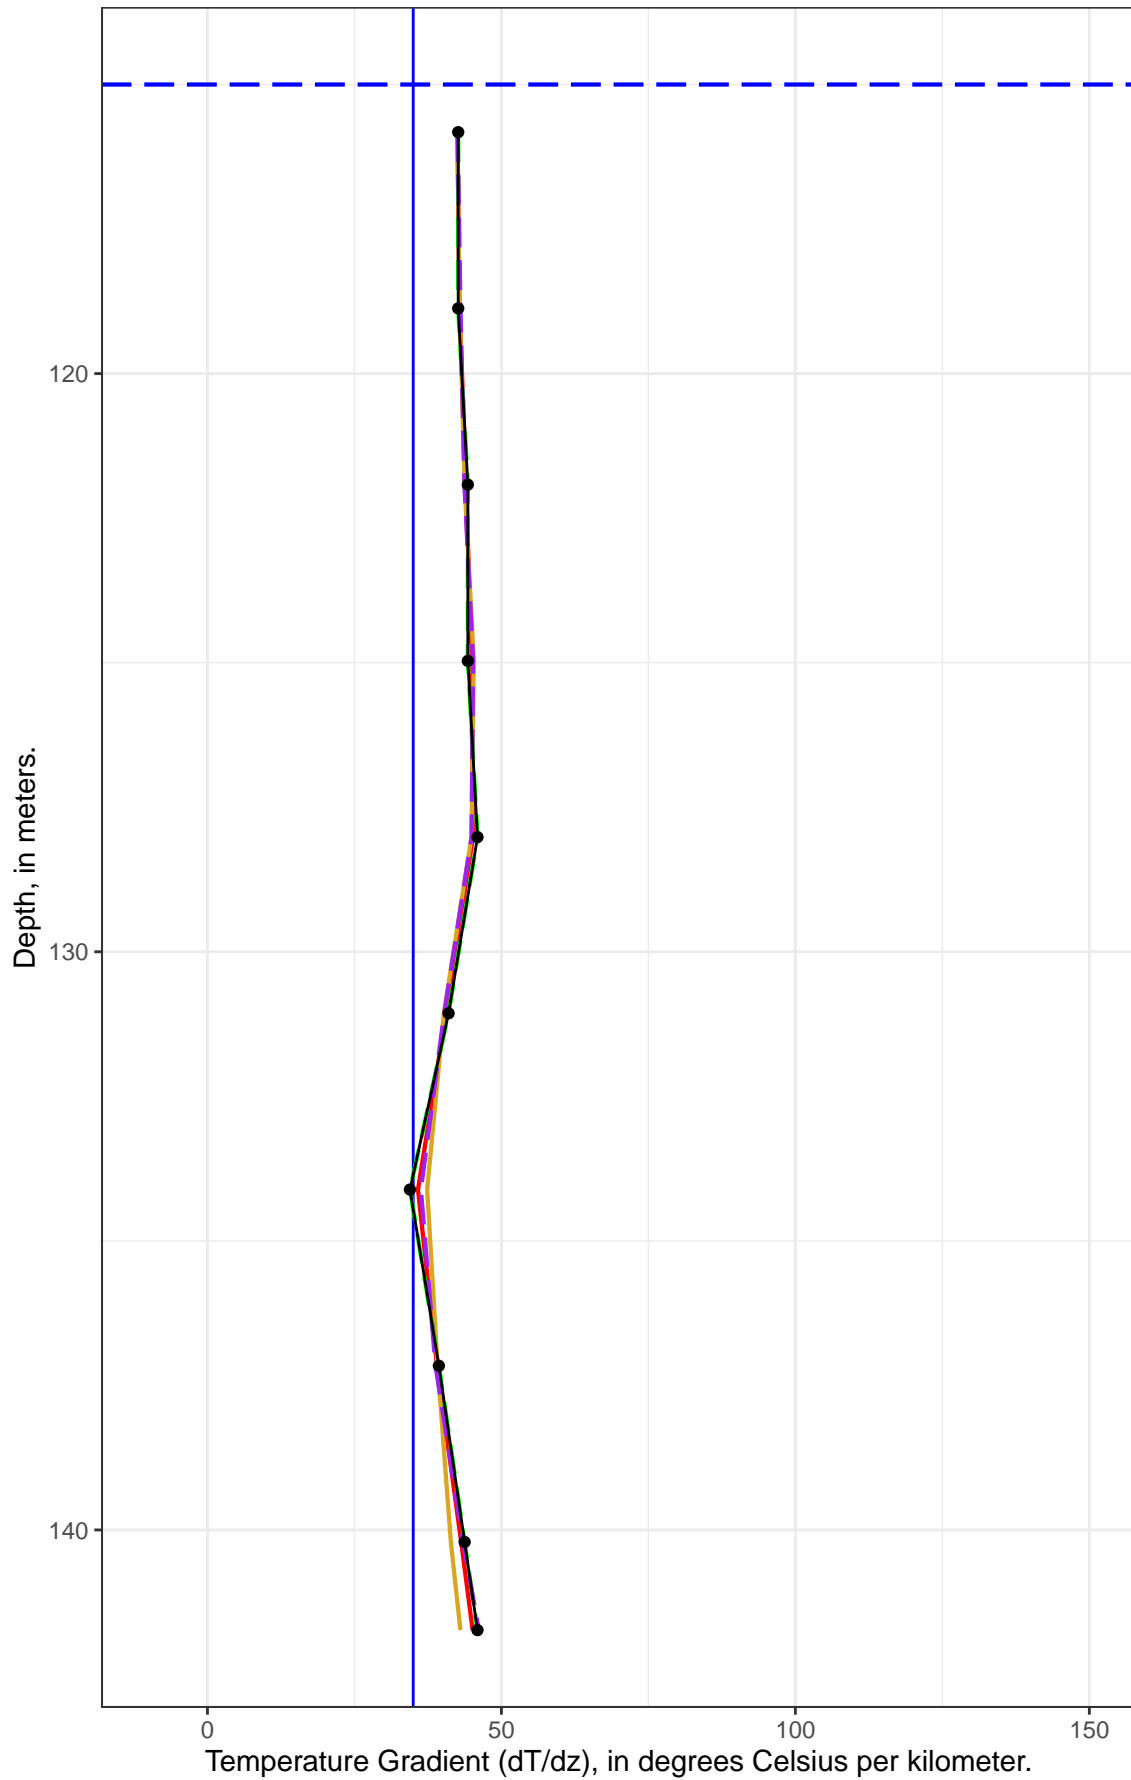

ID: 110 [H-22-76-20\_KILBOURNE\_HOLE] Second Derivative

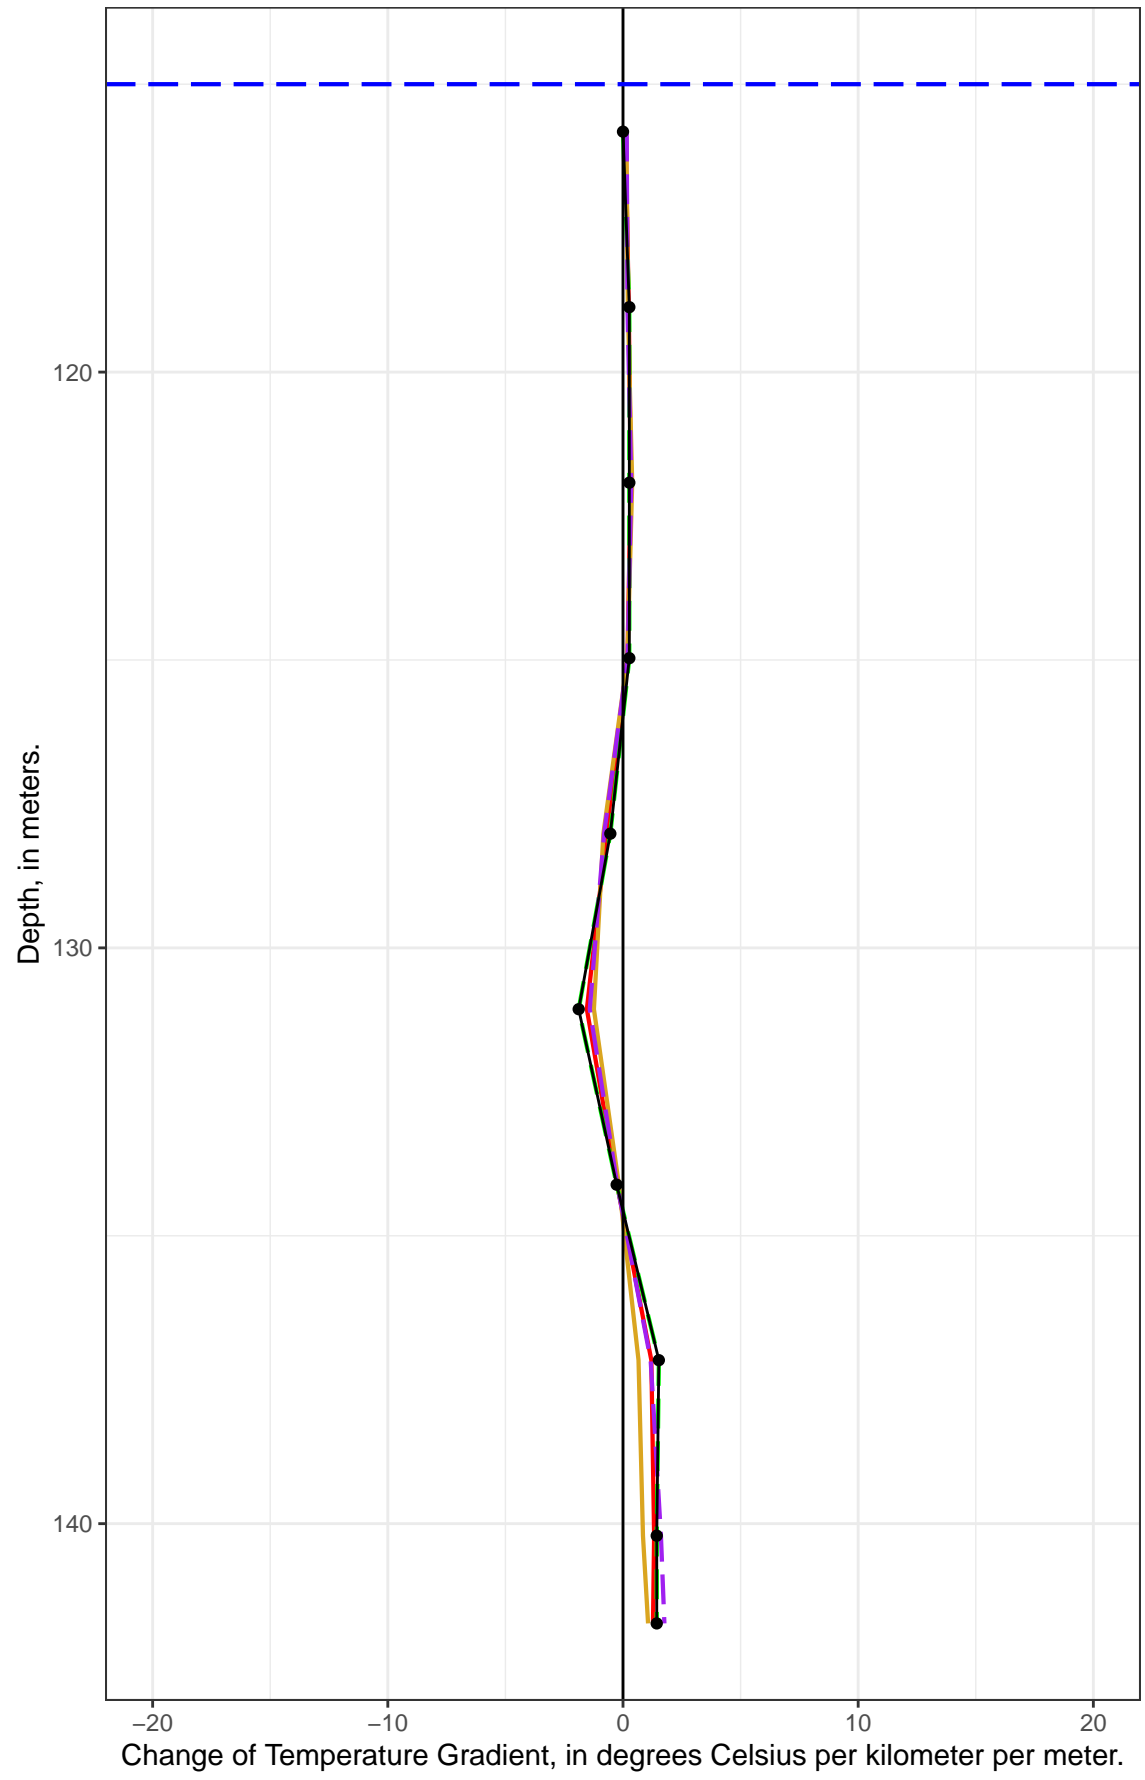

• Data — LOESS (AICC) — LOESS (constant) — LOESS (GCV) — Spline

• Data — LOESS (AICC) — LOESS (constant) — LOESS (GCV) — Spline

• Data — LOESS (AICC) — LOESS (constant) — LOESS (GCV) — Spline

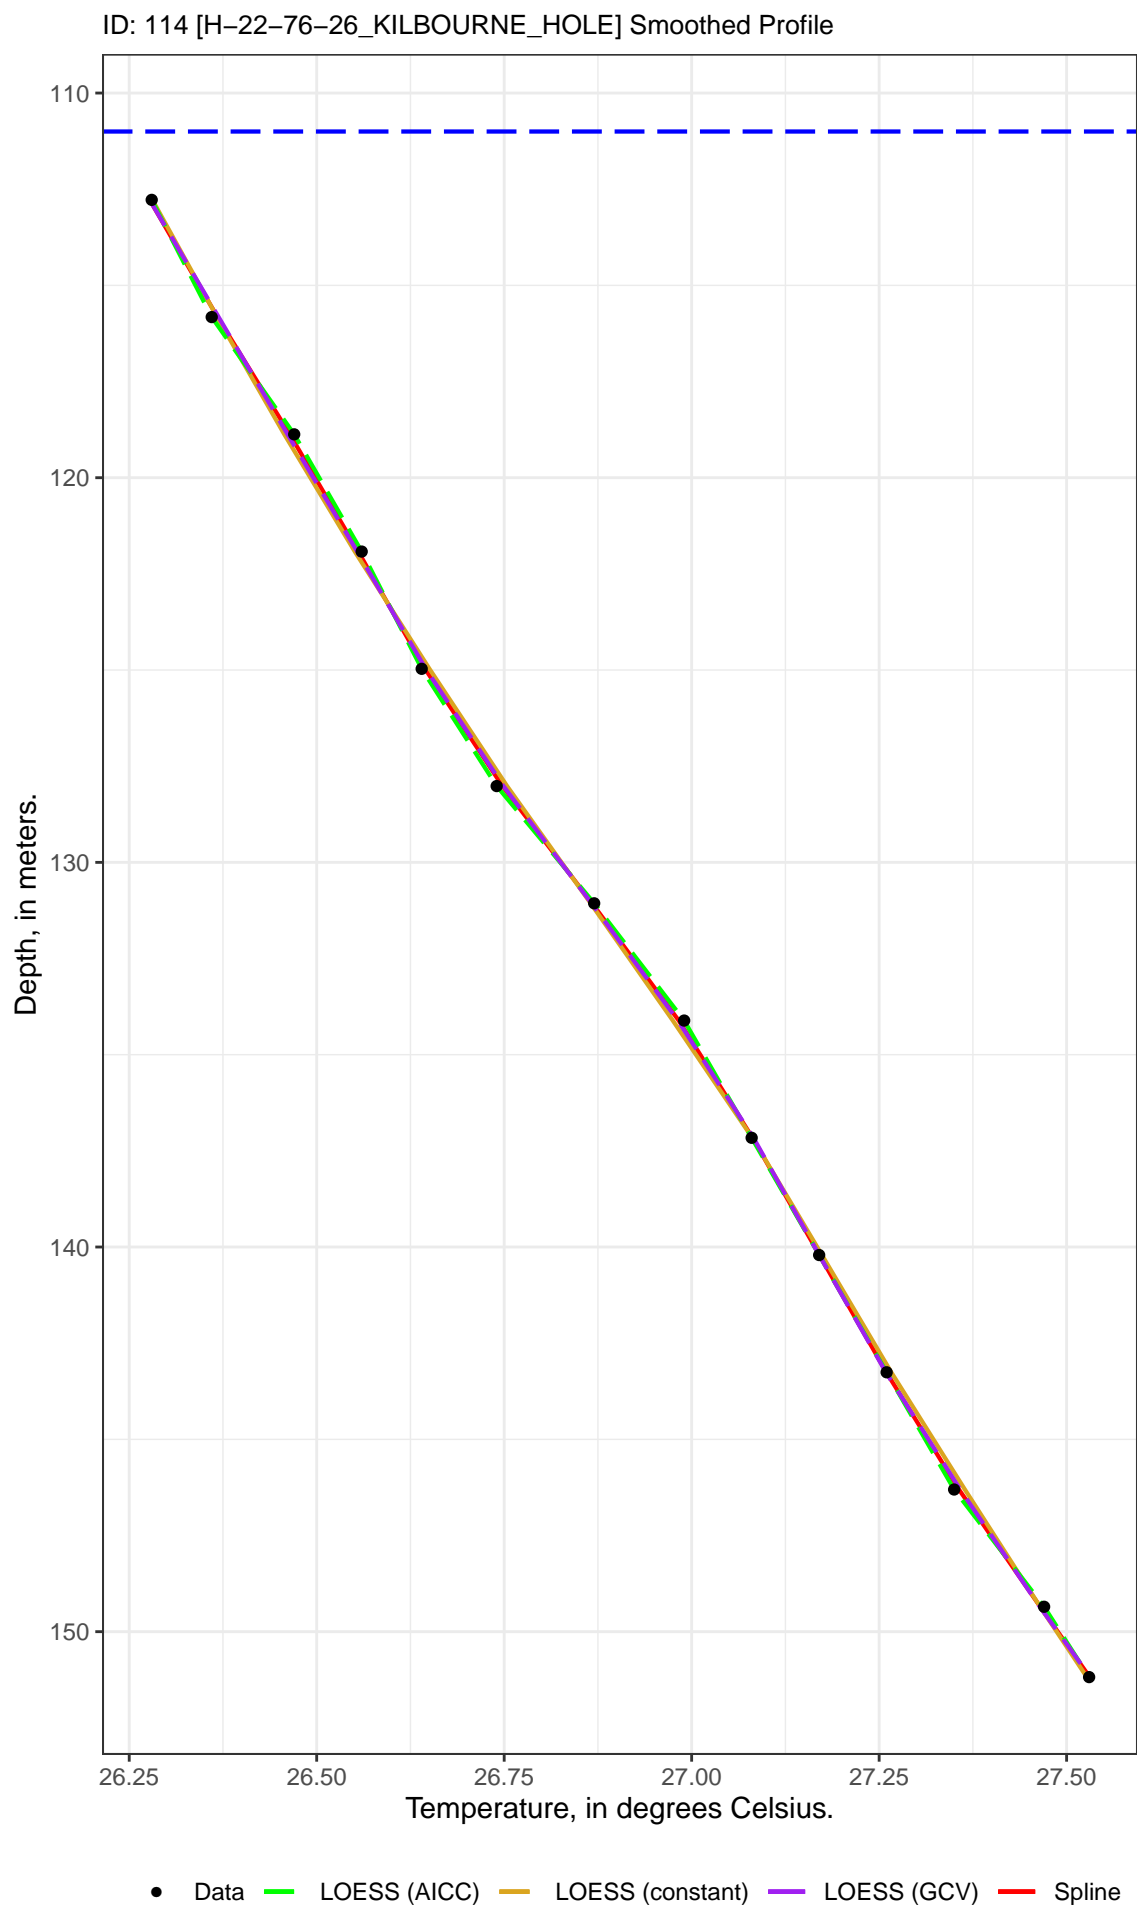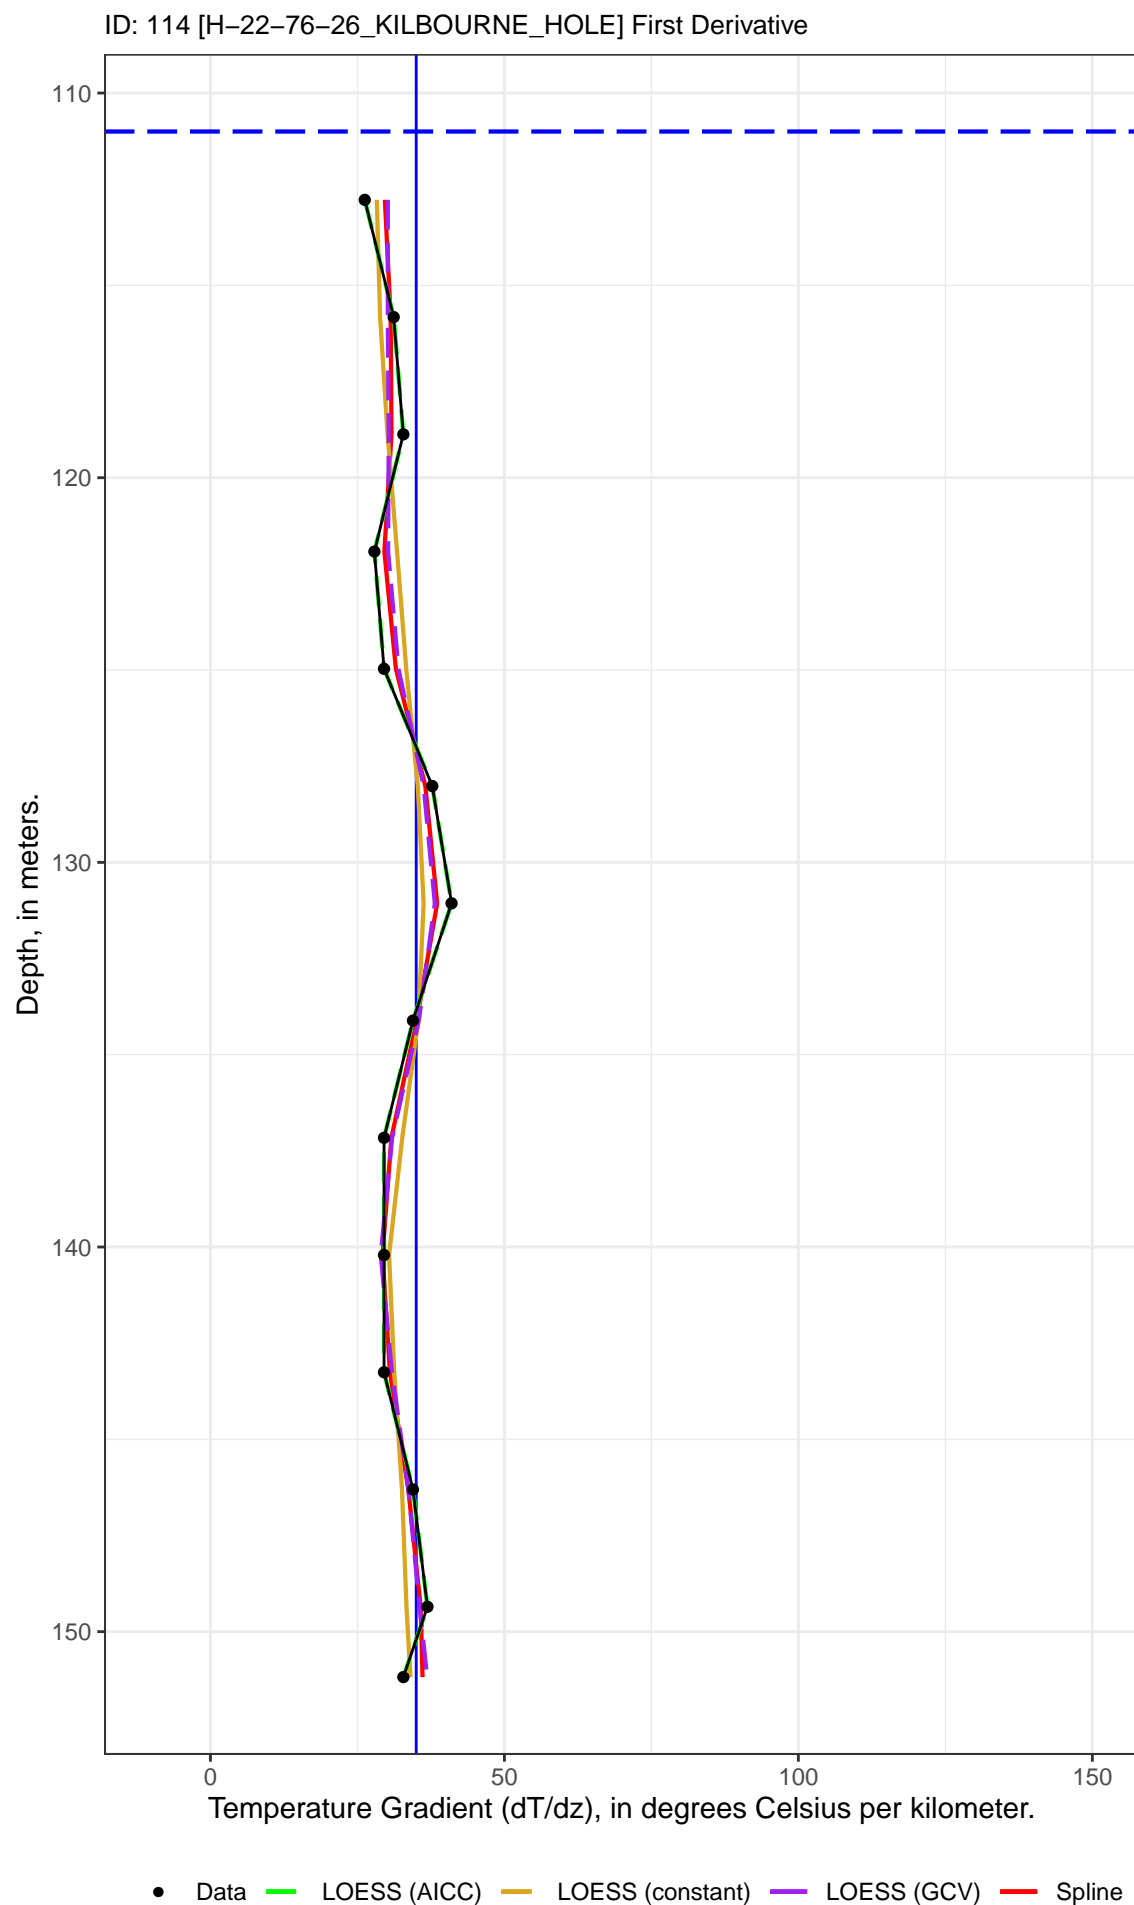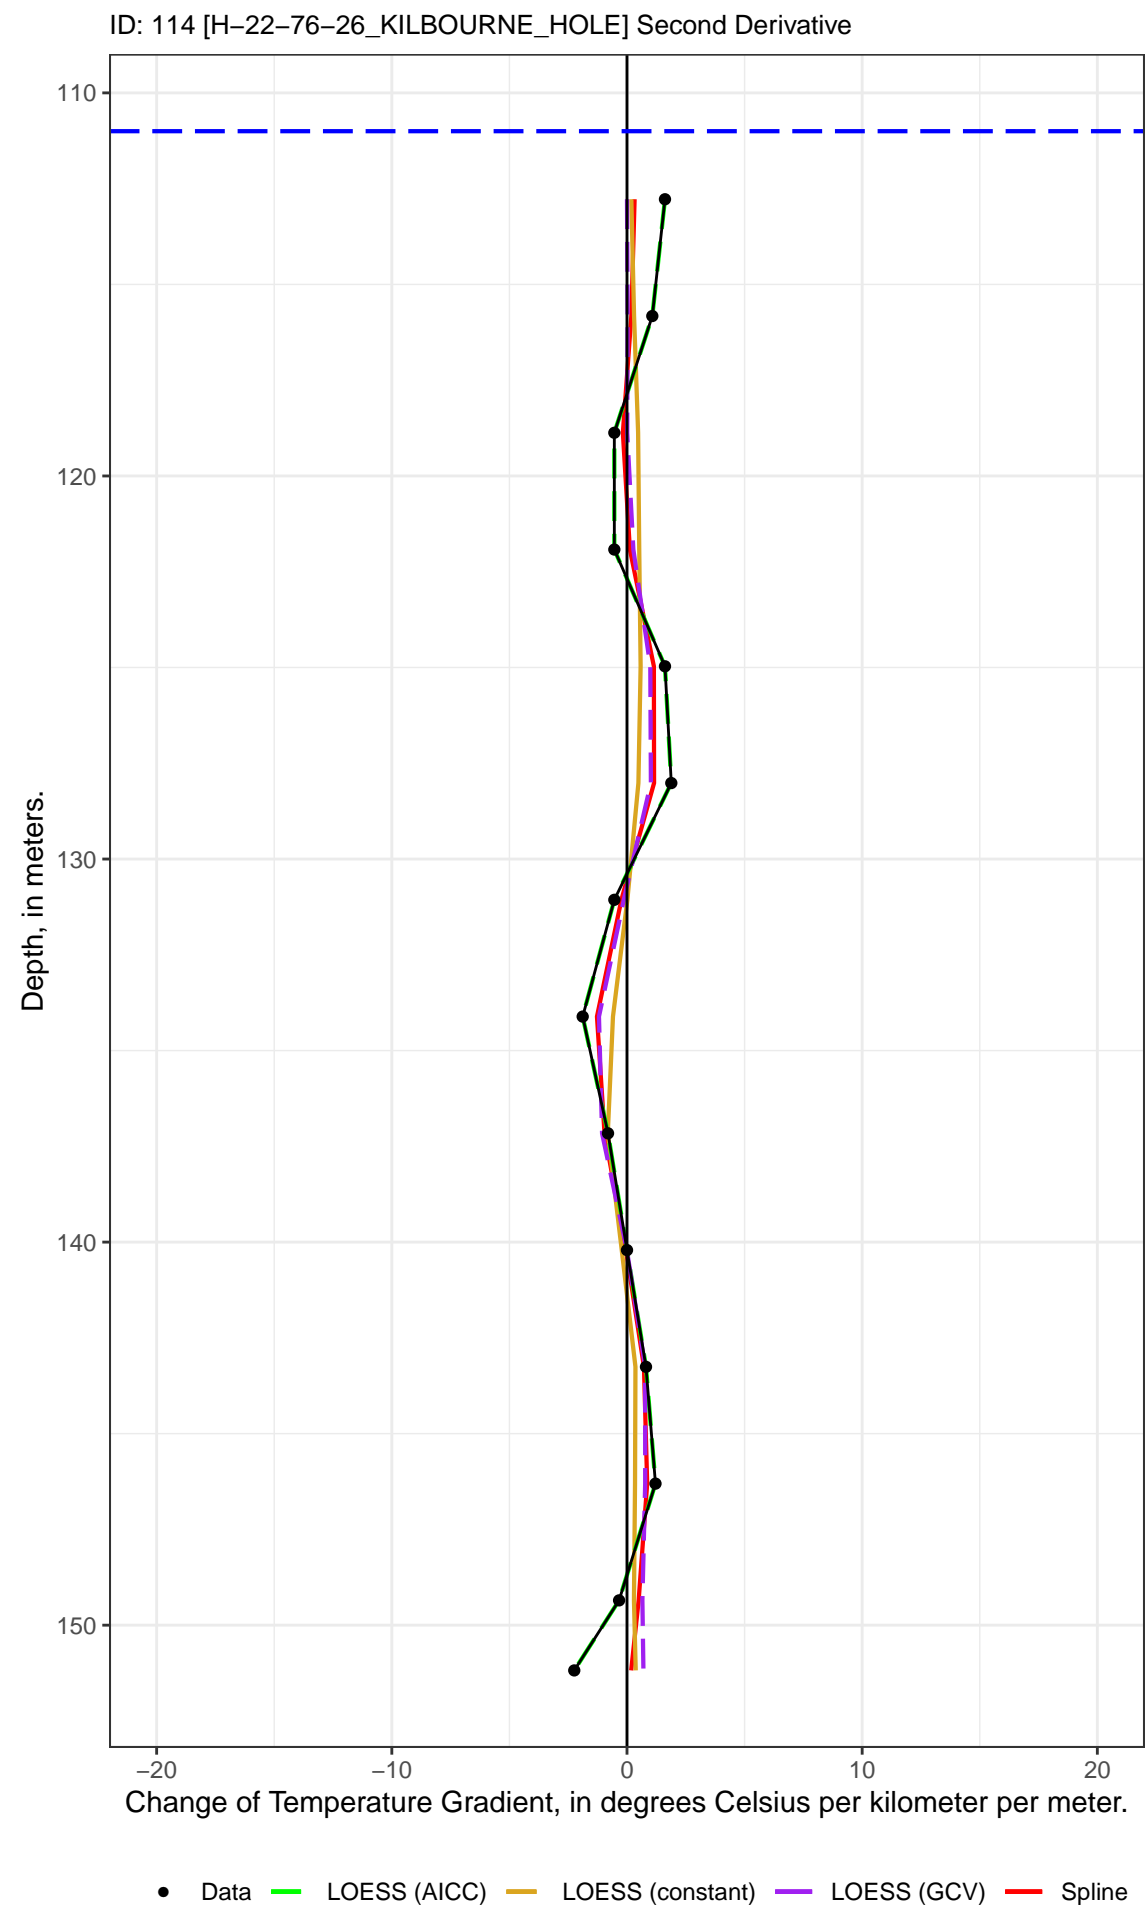

ID: 115 [H-22-76-27\_KILBOURNE\_HOLE] Smoothed Profile

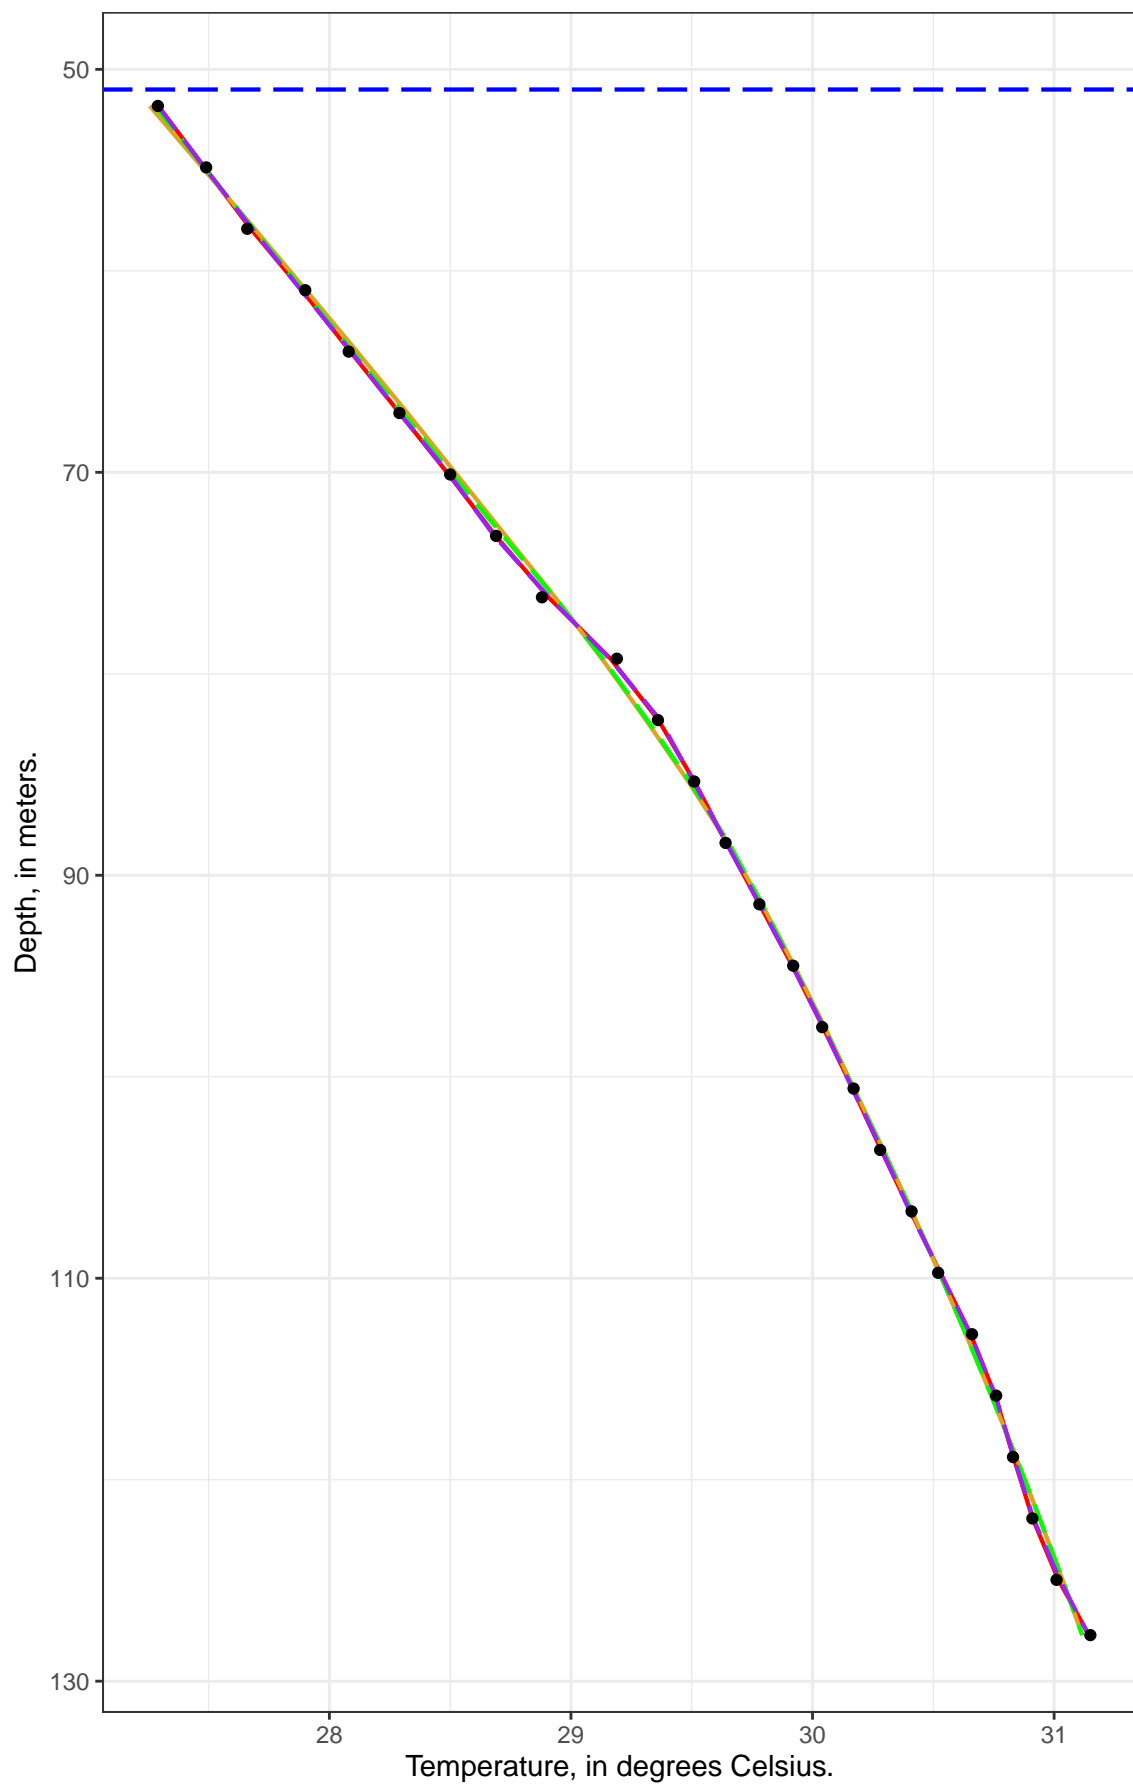

ID: 115 [H-22-76-27\_KILBOURNE\_HOLE] First Derivative

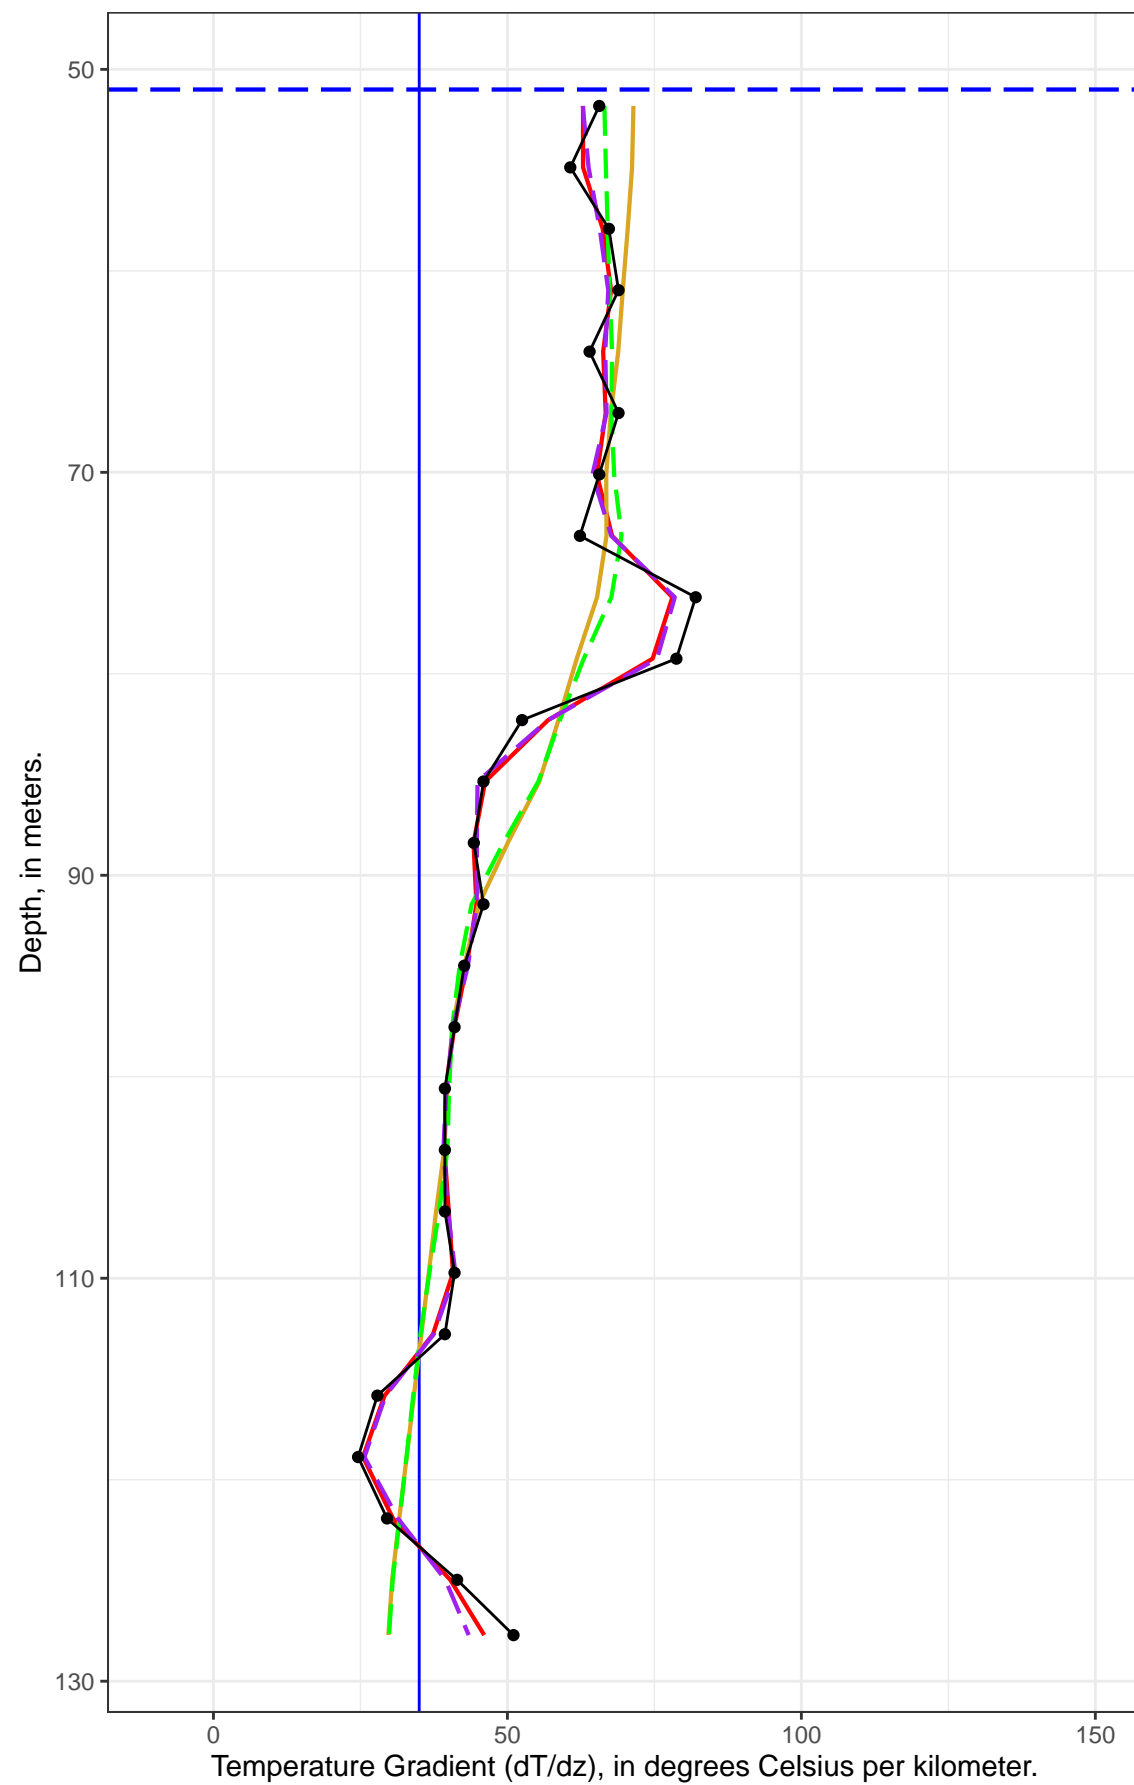

ID: 115 [H-22-76-27\_KILBOURNE\_HOLE] Second Derivative

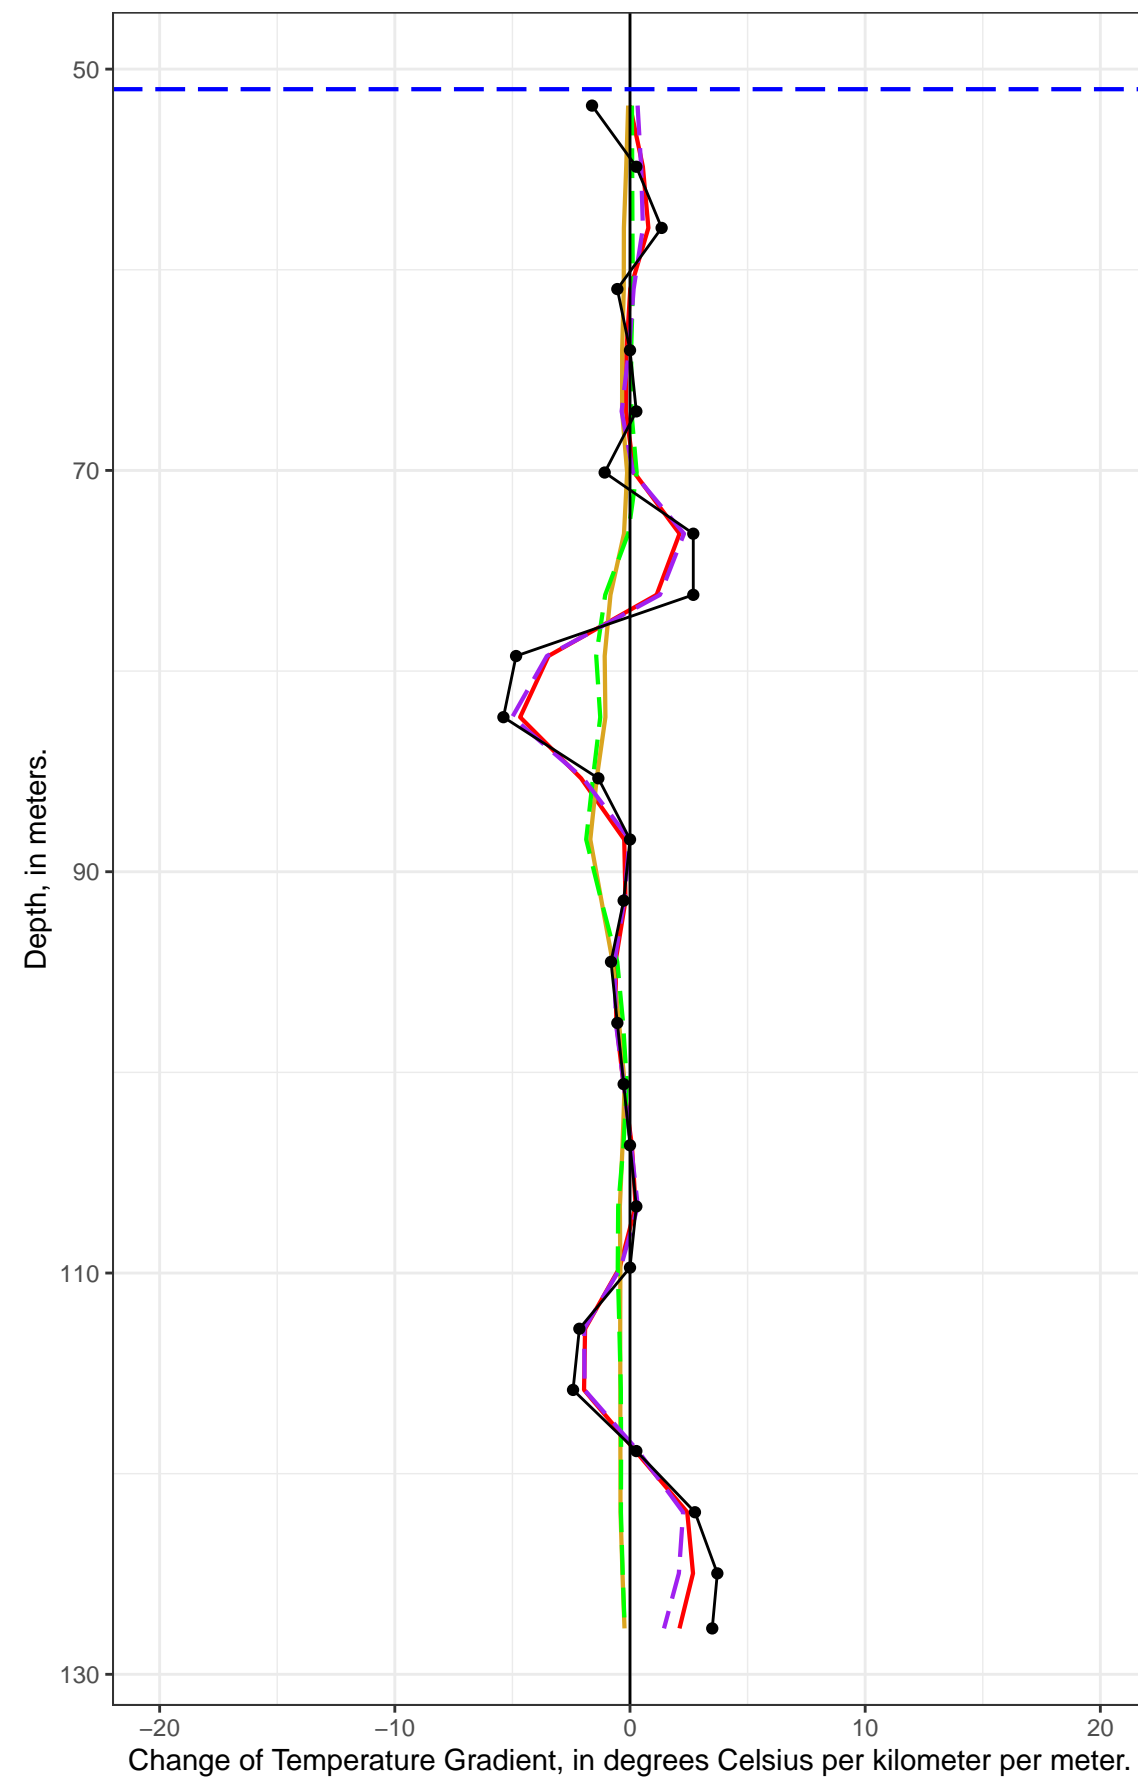

• Data — LOESS (AICC) — LOESS (constant) — LOESS (GCV) — Spline

• Data — LOESS (AICC) — LOESS (constant) — LOESS (GCV) — Spline

• Data — LOESS (AICC) — LOESS (constant) — LOESS (GCV) — Spline

ID: 116 [H-22-76-28\_KILBOURNE\_HOLE] Smoothed Profile

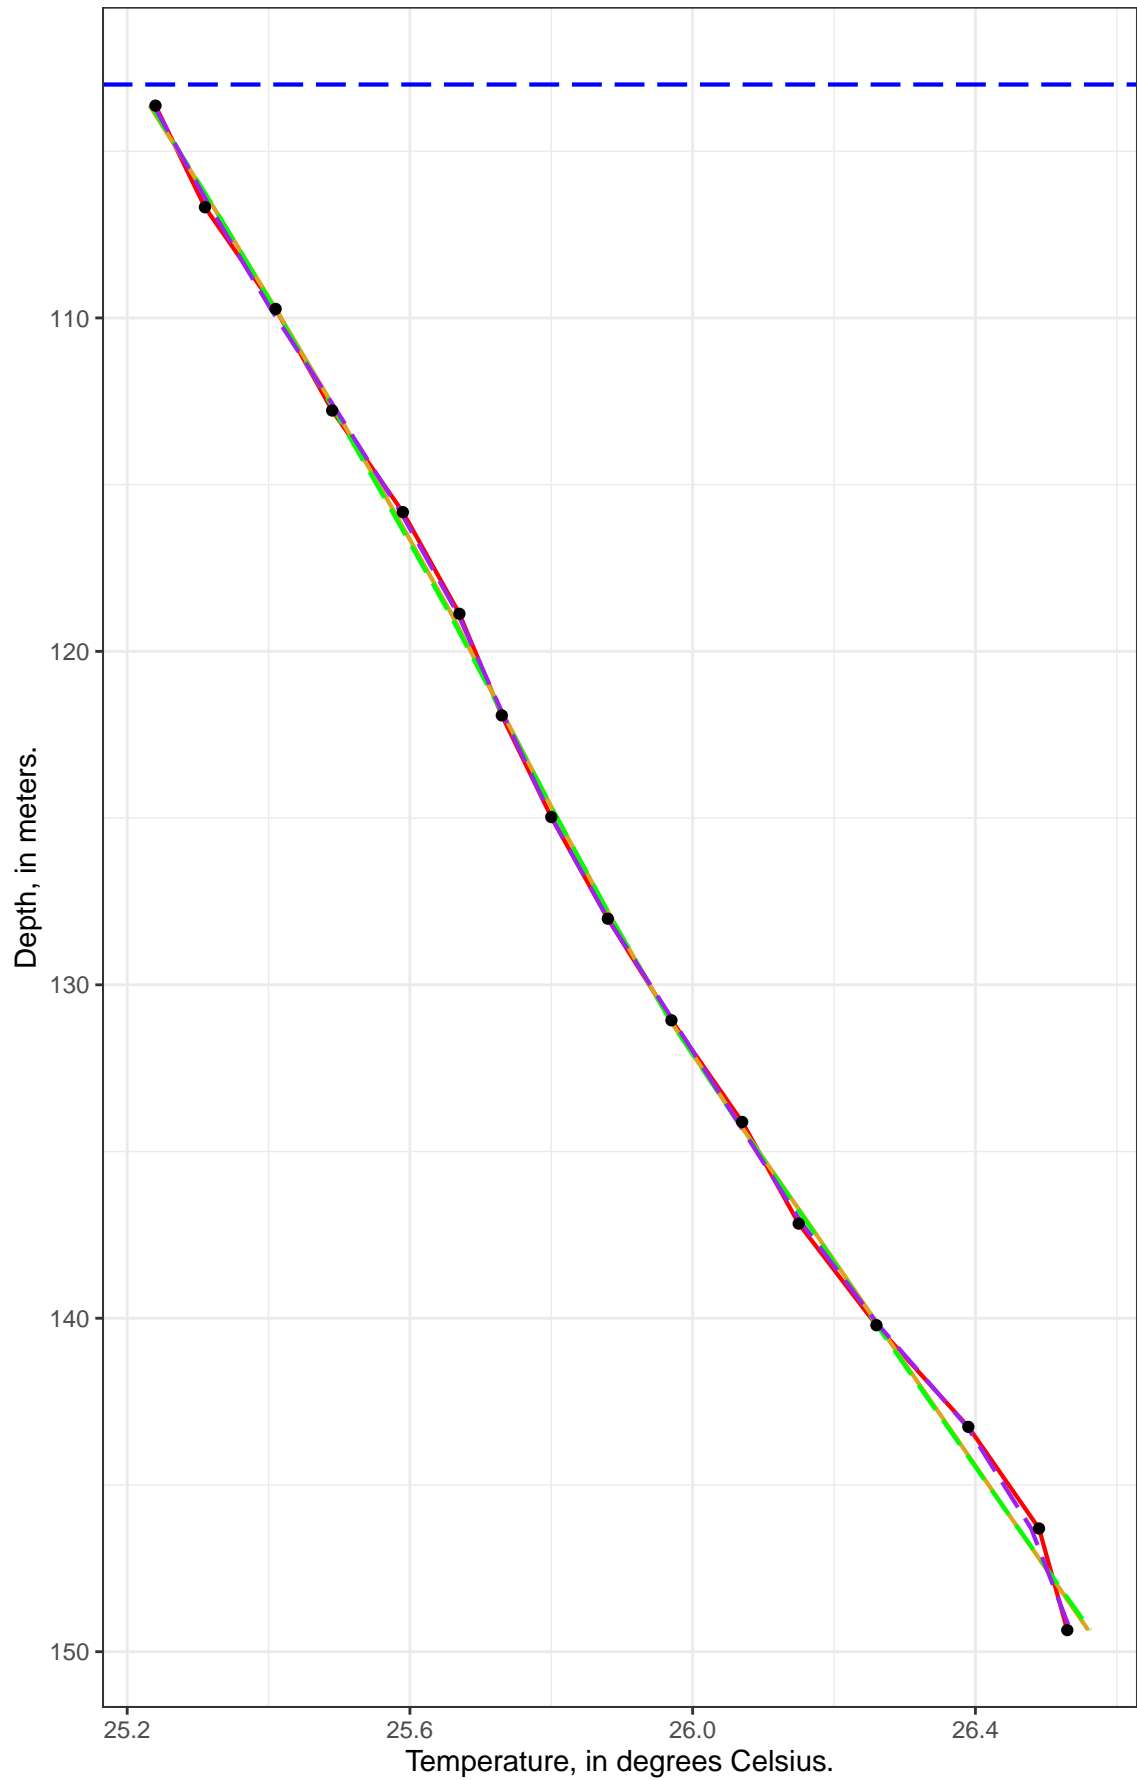

ID: 116 [H-22-76-28\_KILBOURNE\_HOLE] First Derivative

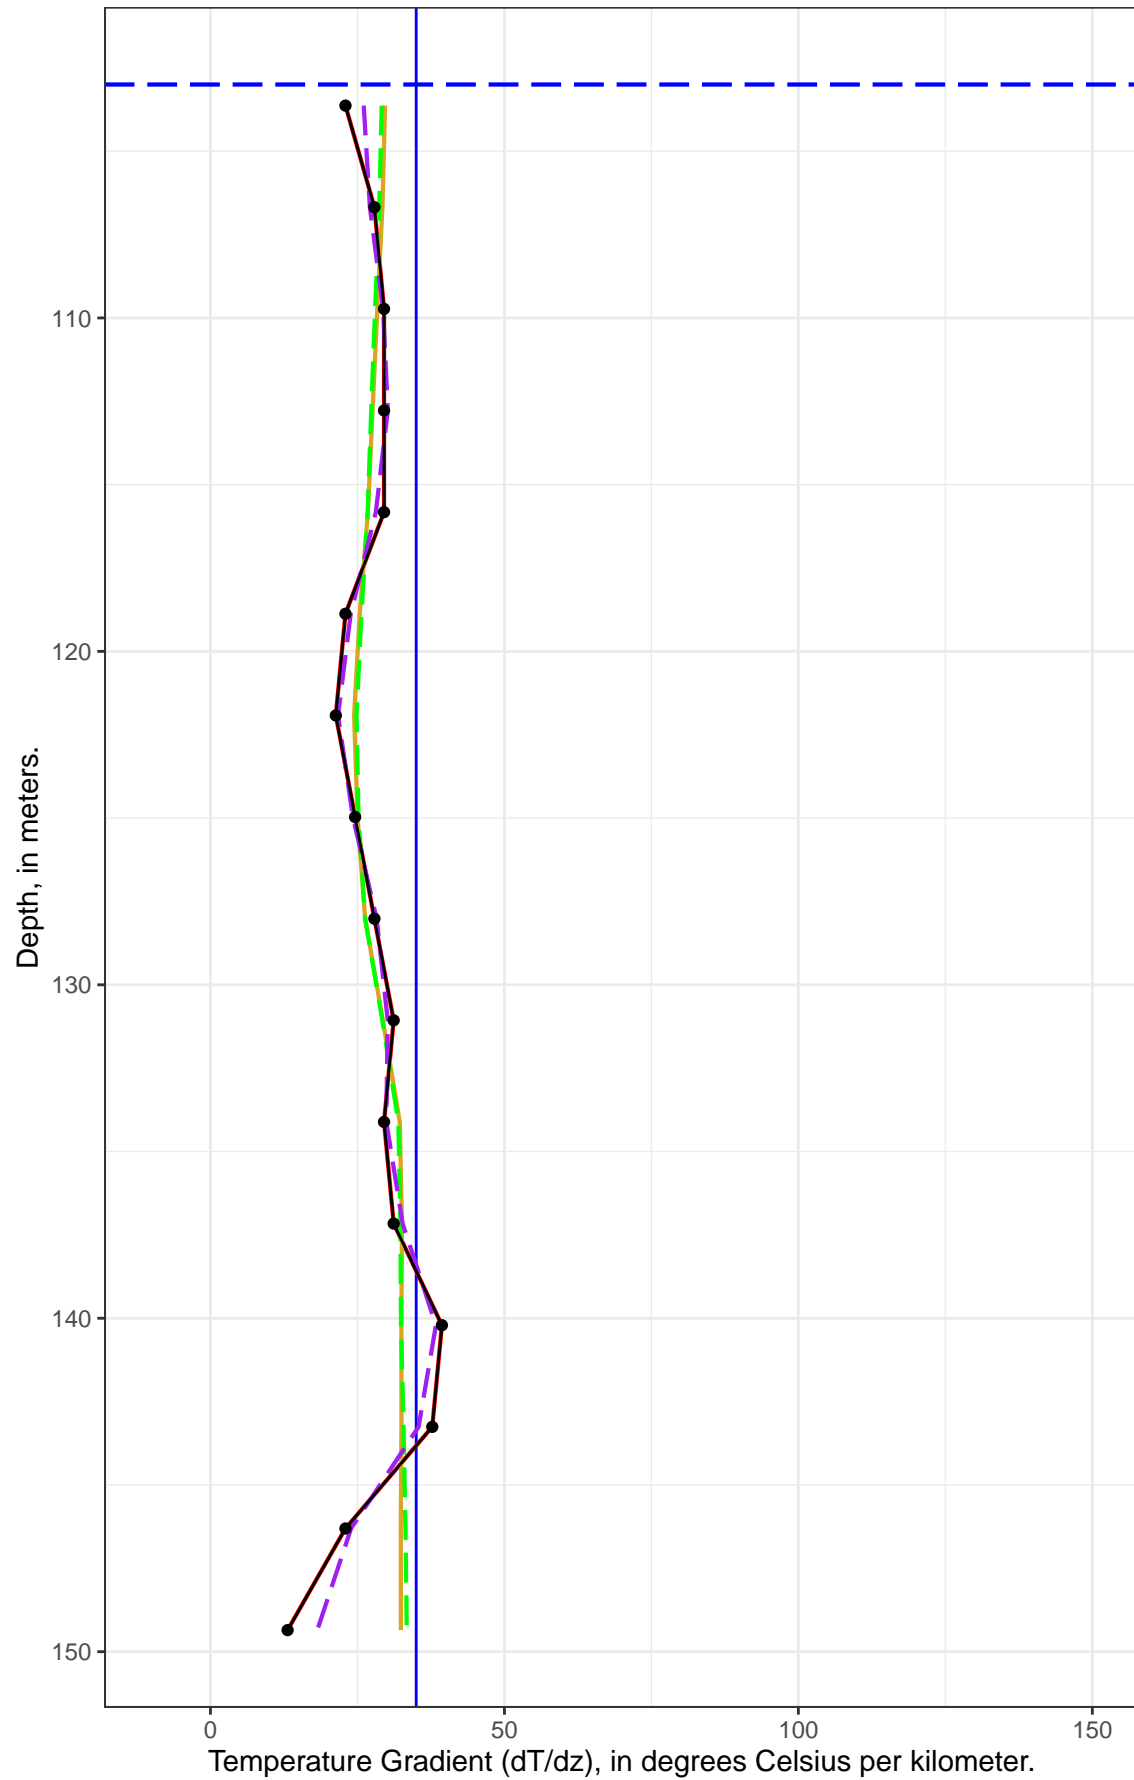

ID: 116 [H-22-76-28\_KILBOURNE\_HOLE] Second Derivative

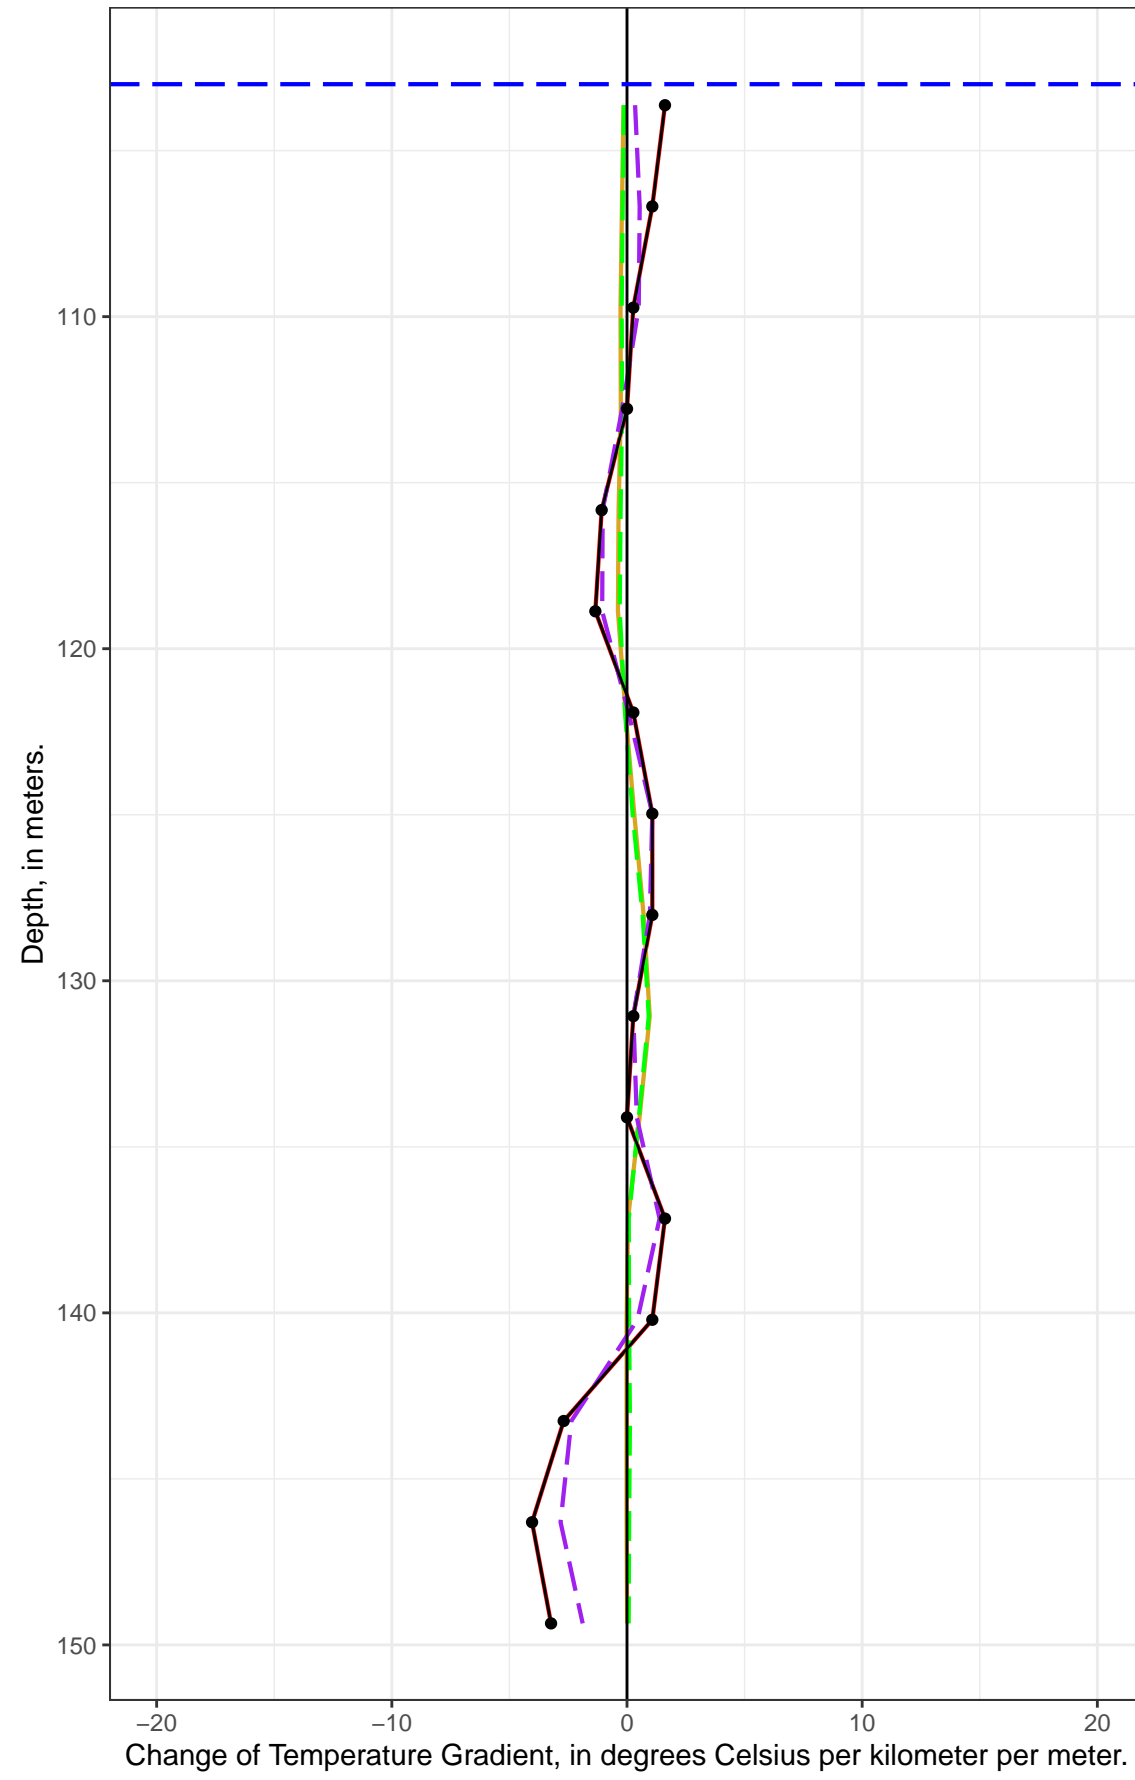

• Data — LOESS (AICC) — LOESS (constant) — LOESS (GCV) — Spline

• Data — LOESS (AICC) — LOESS (constant) — LOESS (GCV) — Spline

• Data — LOESS (AICC) — LOESS (constant) — LOESS (GCV) — Spline

ID: 117 [H-22-76-29\_KILBOURNE\_HOLE] Smoothed Profile

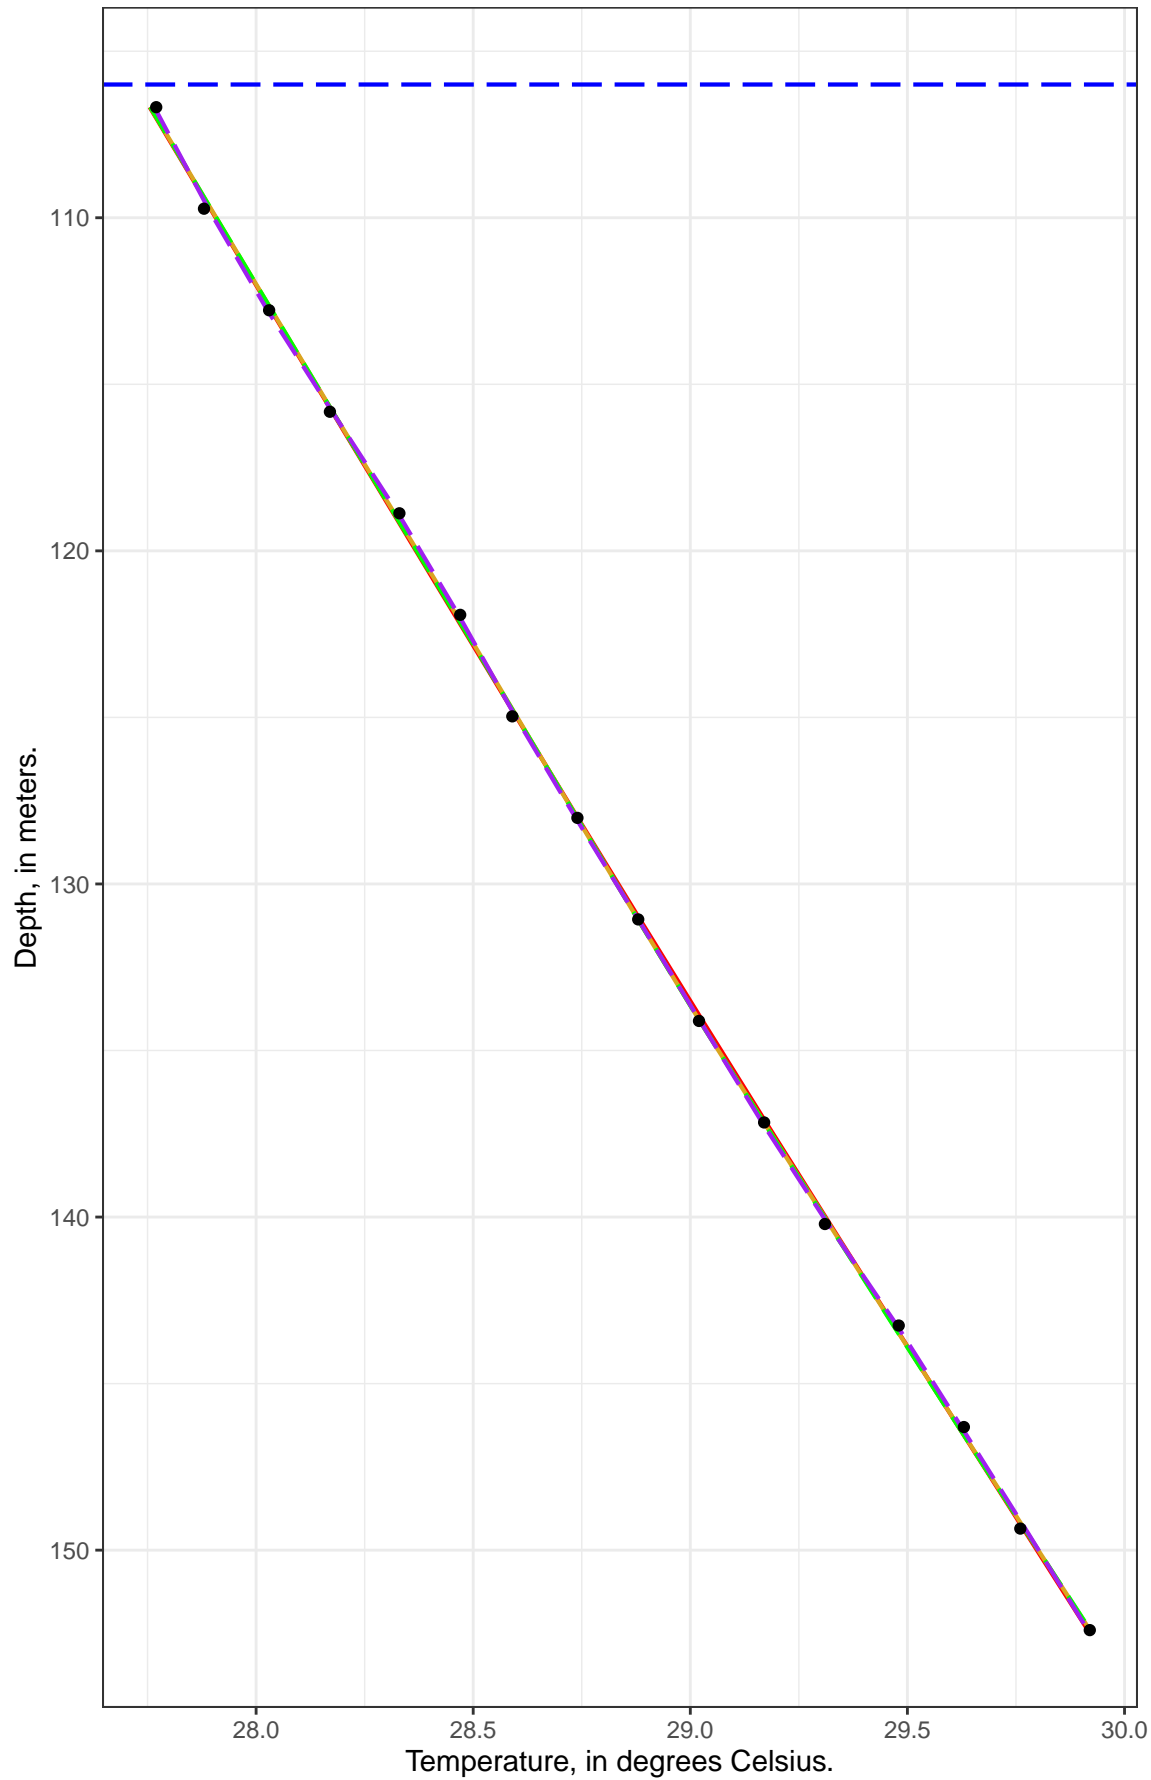

ID: 117 [H-22-76-29\_KILBOURNE\_HOLE] First Derivative

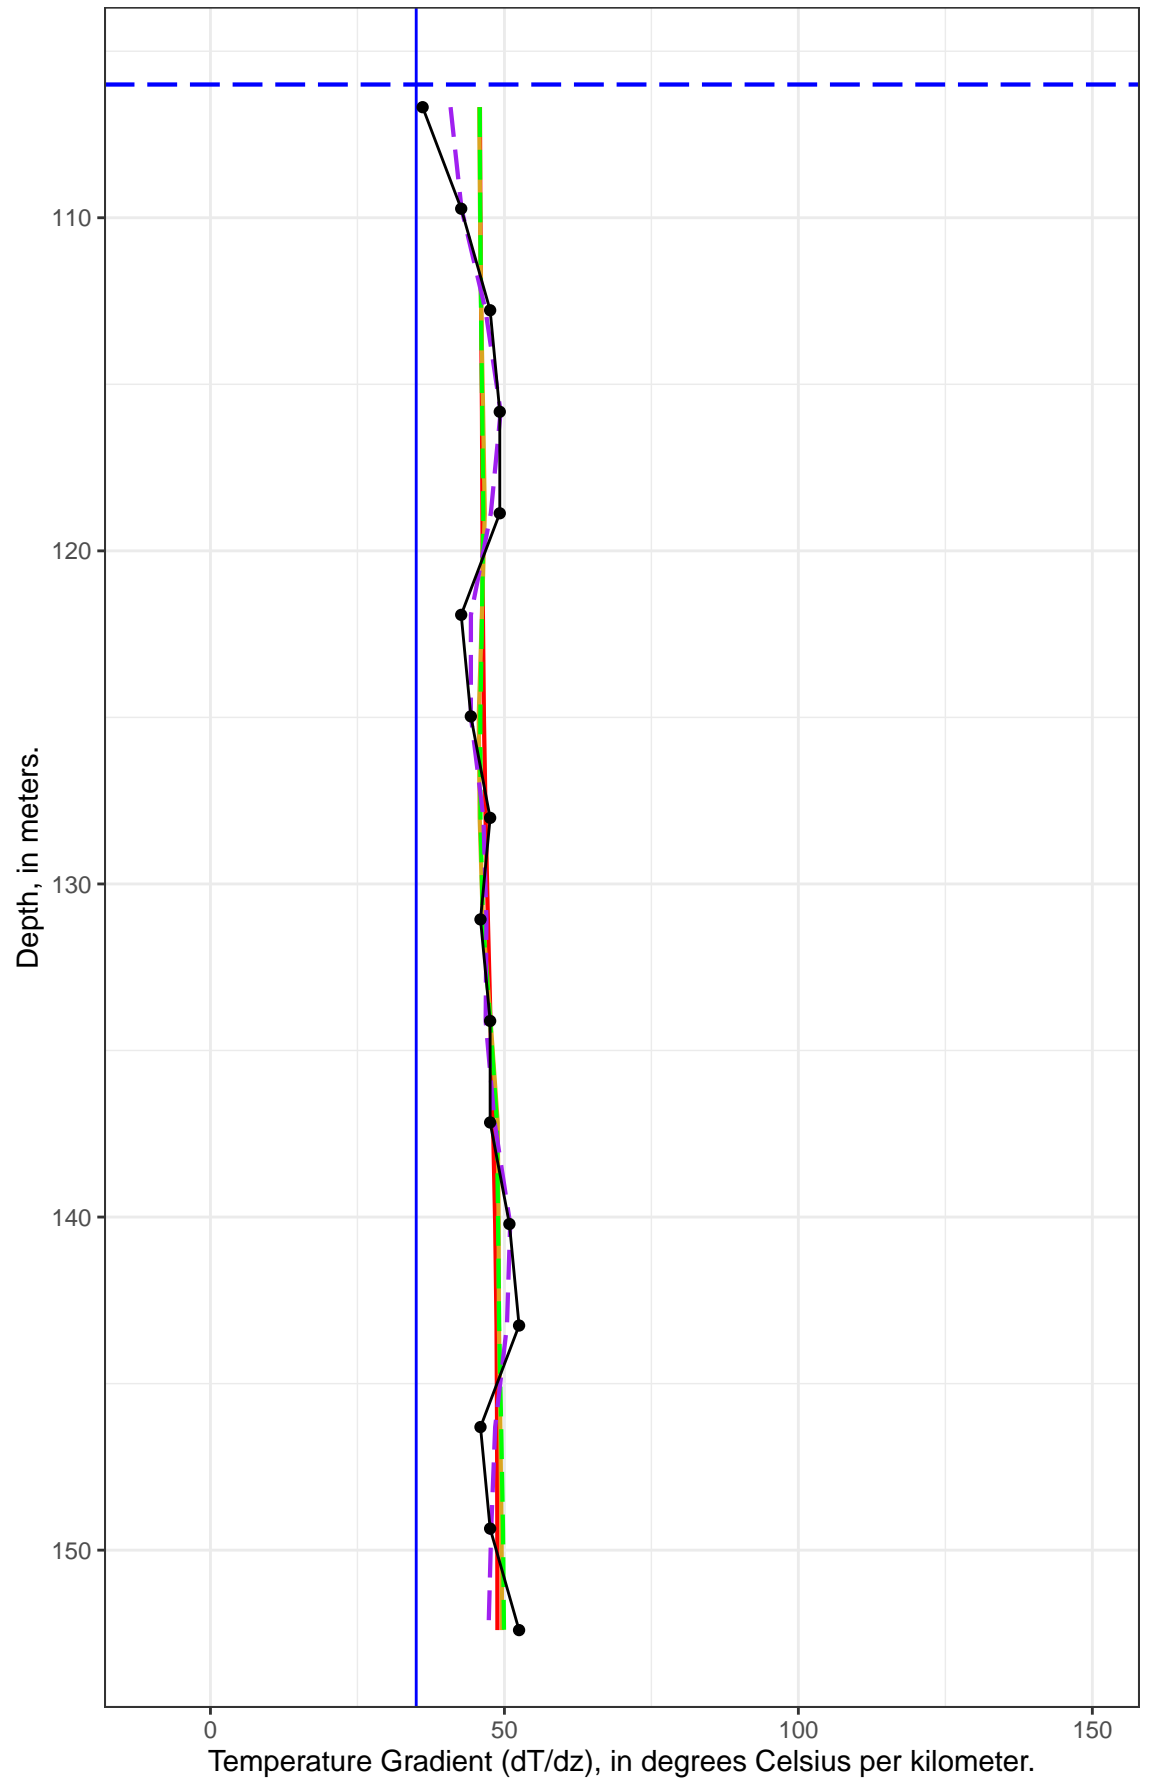

ID: 117 [H-22-76-29\_KILBOURNE\_HOLE] Second Derivative

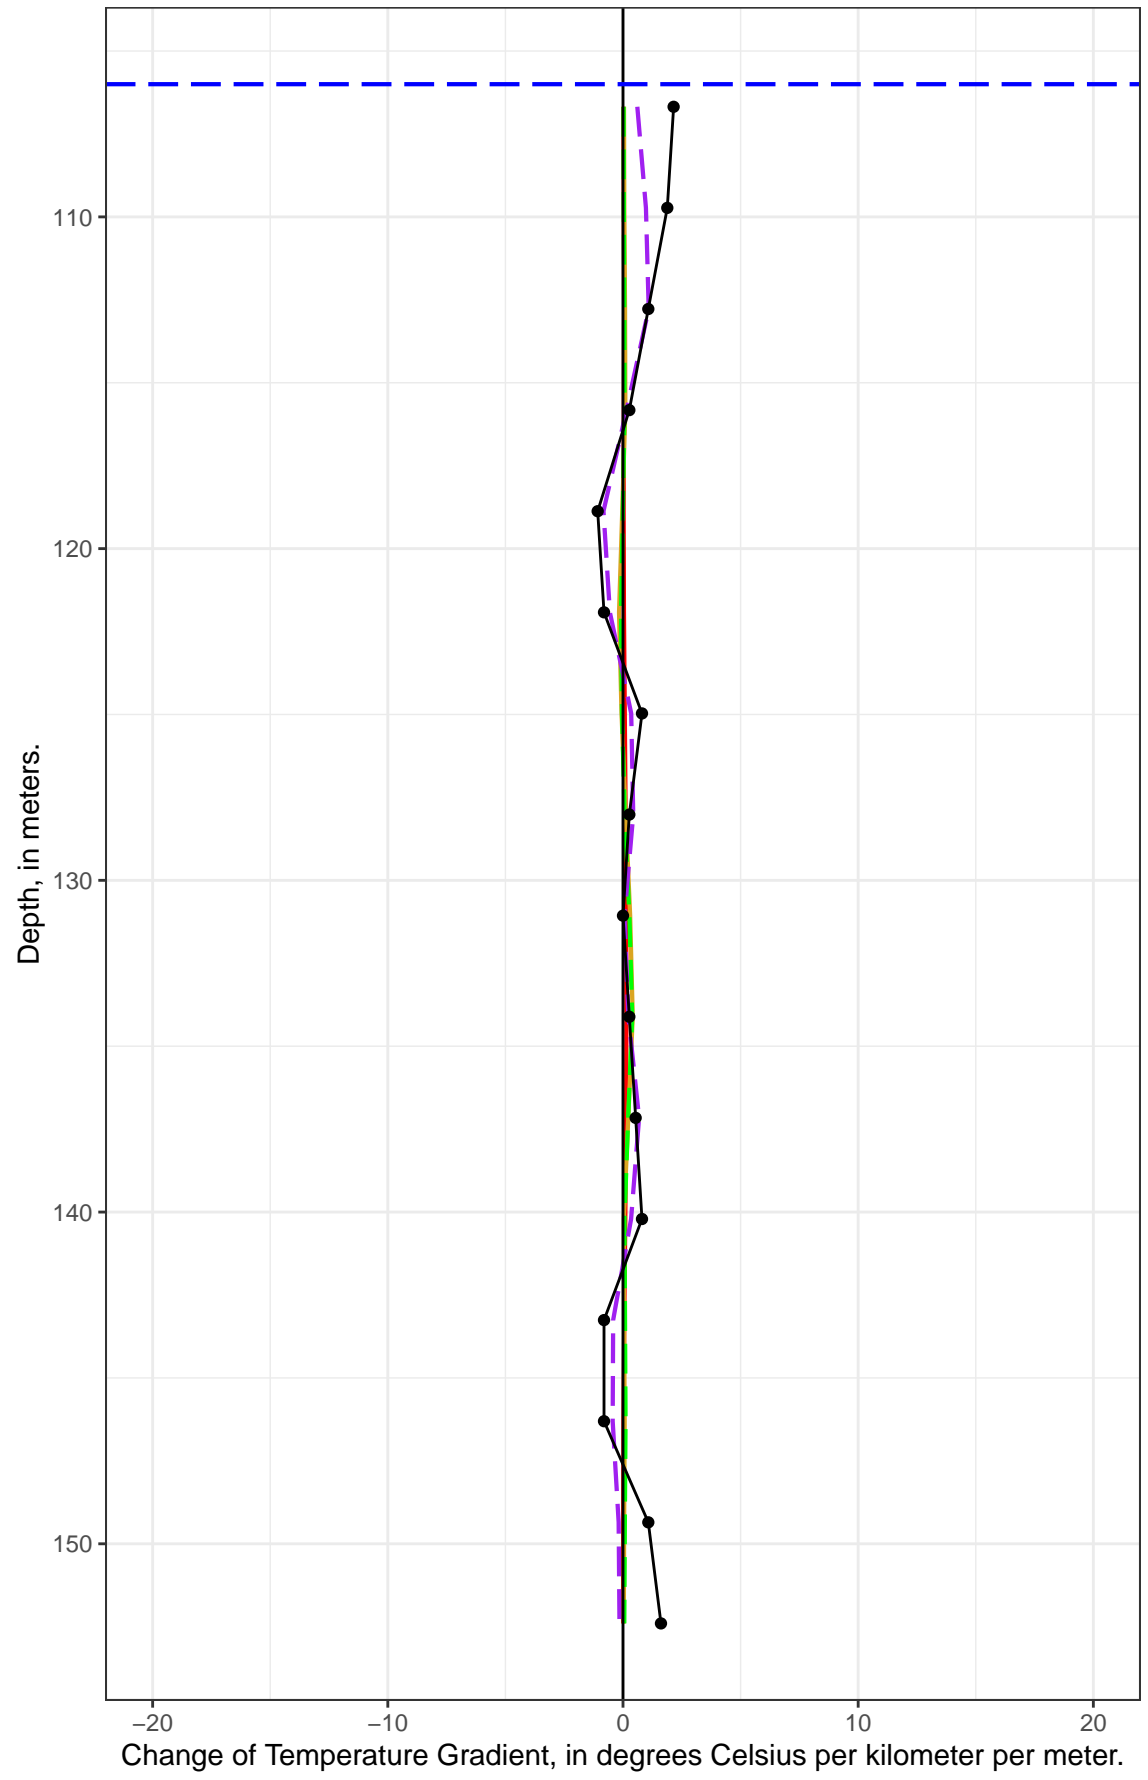

• Data — LOESS (AICC) — LOESS (constant) — LOESS (GCV) — Spline

• Data — LOESS (AICC) — LOESS (constant) — LOESS (GCV) — Spline

• Data — LOESS (AICC) — LOESS (constant) — LOESS (GCV) — Spline

ID: 118 [H-22-76-30\_KILBOURNE\_HOLE] Smoothed Profile

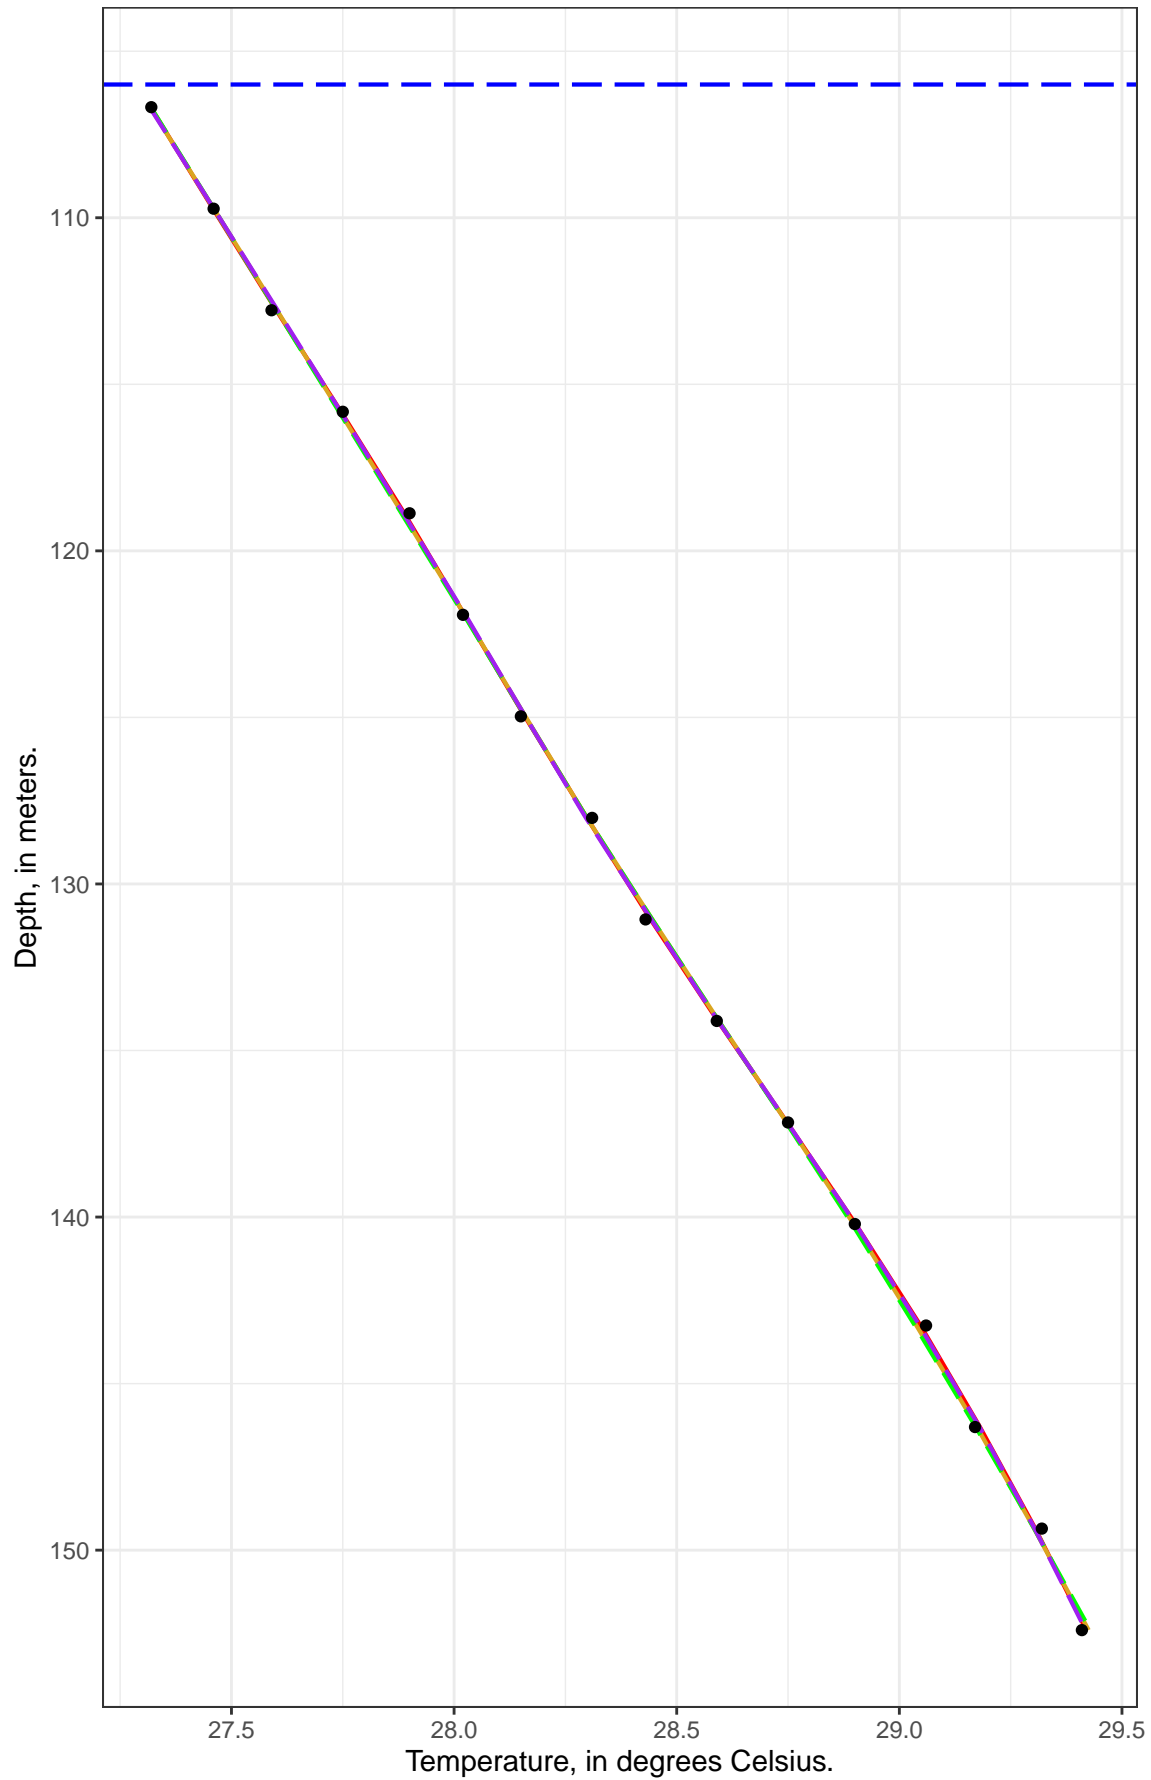

ID: 118 [H-22-76-30\_KILBOURNE\_HOLE] First Derivative

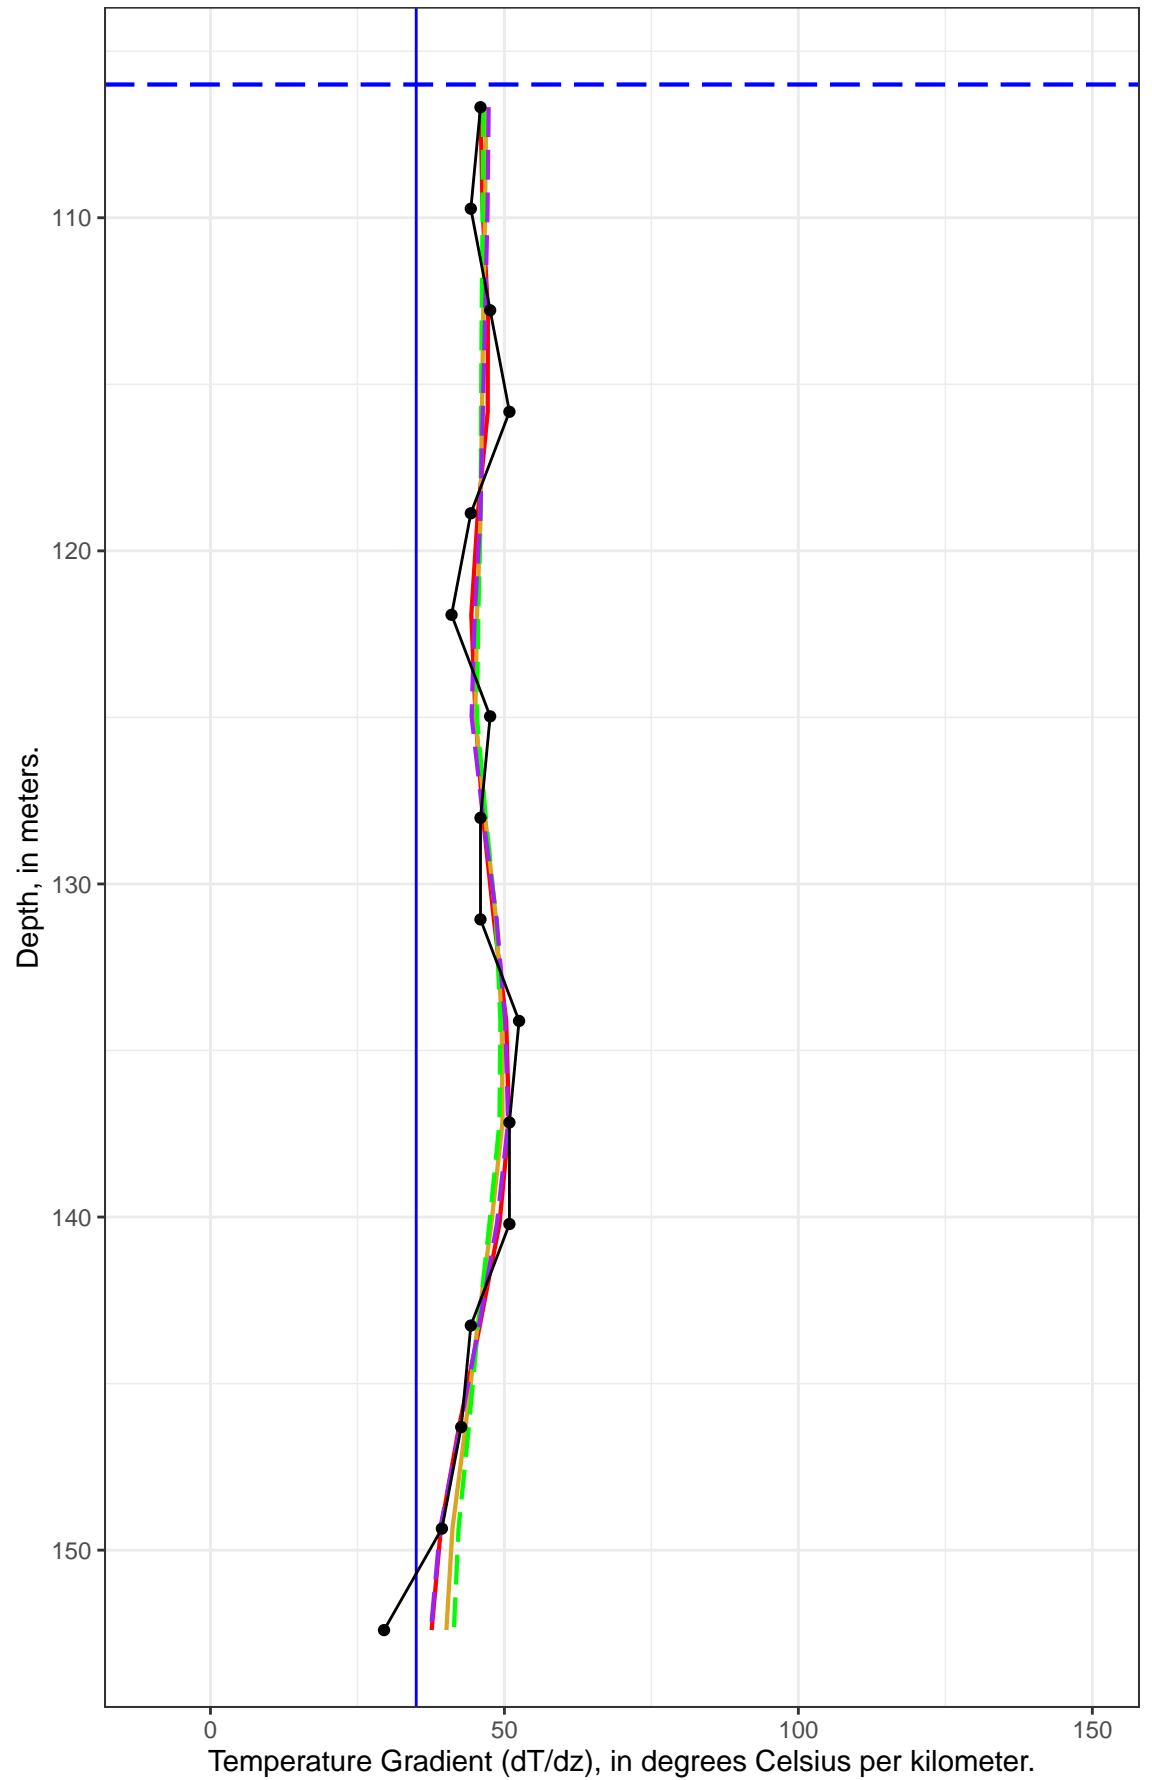

ID: 118 [H-22-76-30\_KILBOURNE\_HOLE] Second Derivative

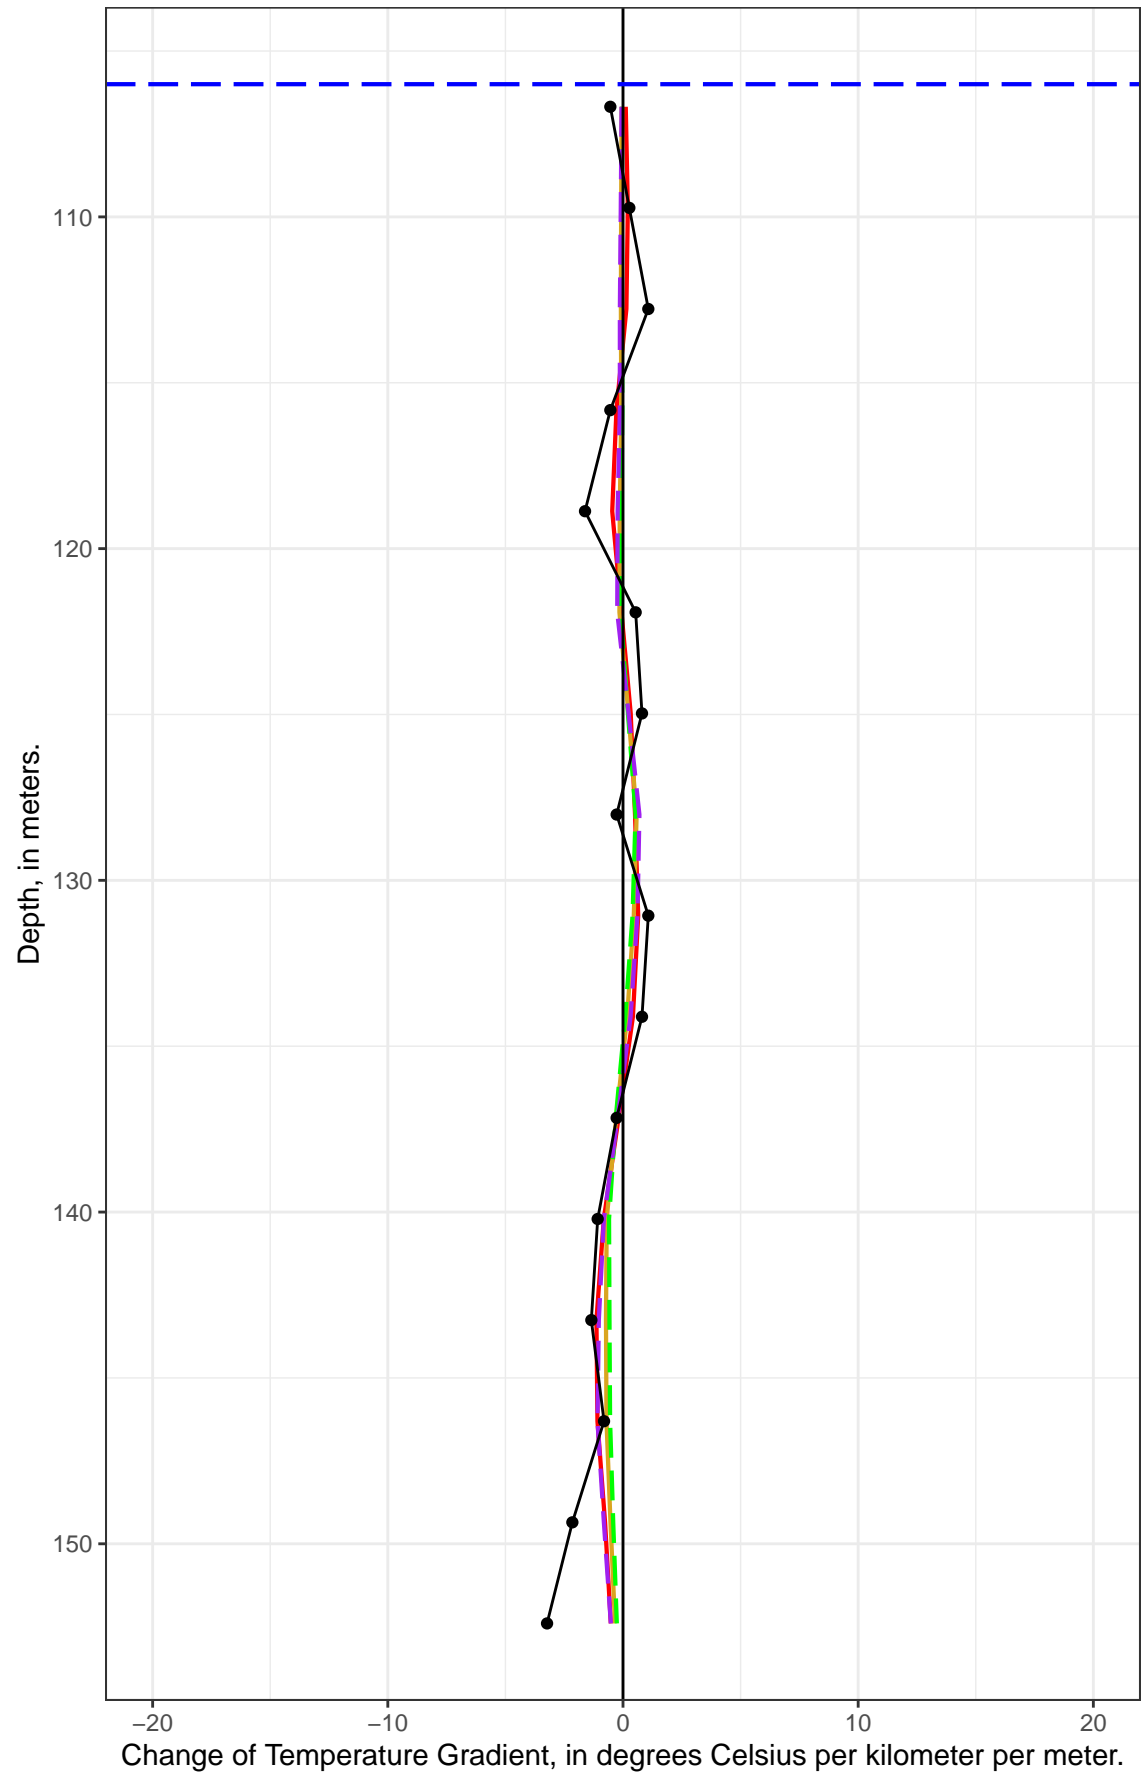

• Data — LOESS (AICC) — LOESS (constant) — LOESS (GCV) — Spline

• Data — LOESS (AICC) — LOESS (constant) — LOESS (GCV) — Spline

• Data — LOESS (AICC) — LOESS (constant) — LOESS (GCV) — Spline

ID: 119 [H-22-76-31\_KILBOURNE\_HOLE] Smoothed Profile

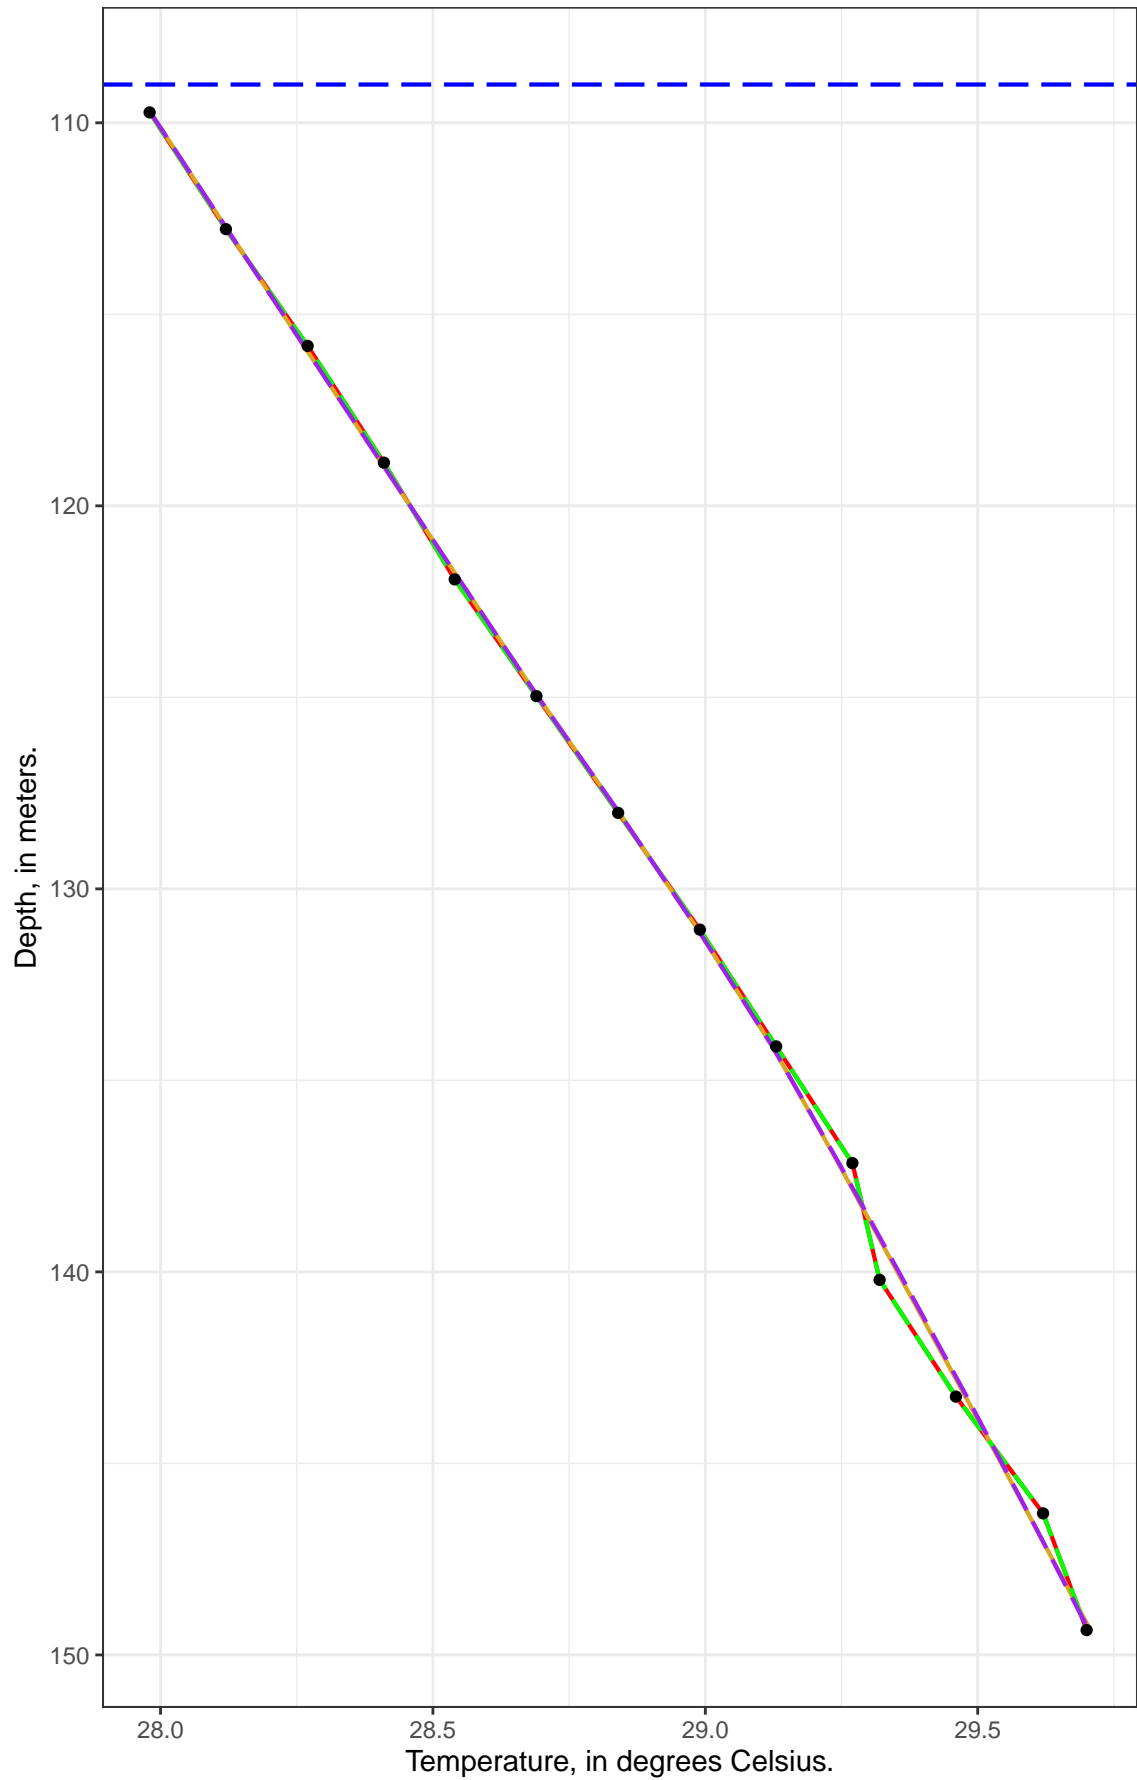

ID: 119 [H-22-76-31\_KILBOURNE\_HOLE] First Derivative

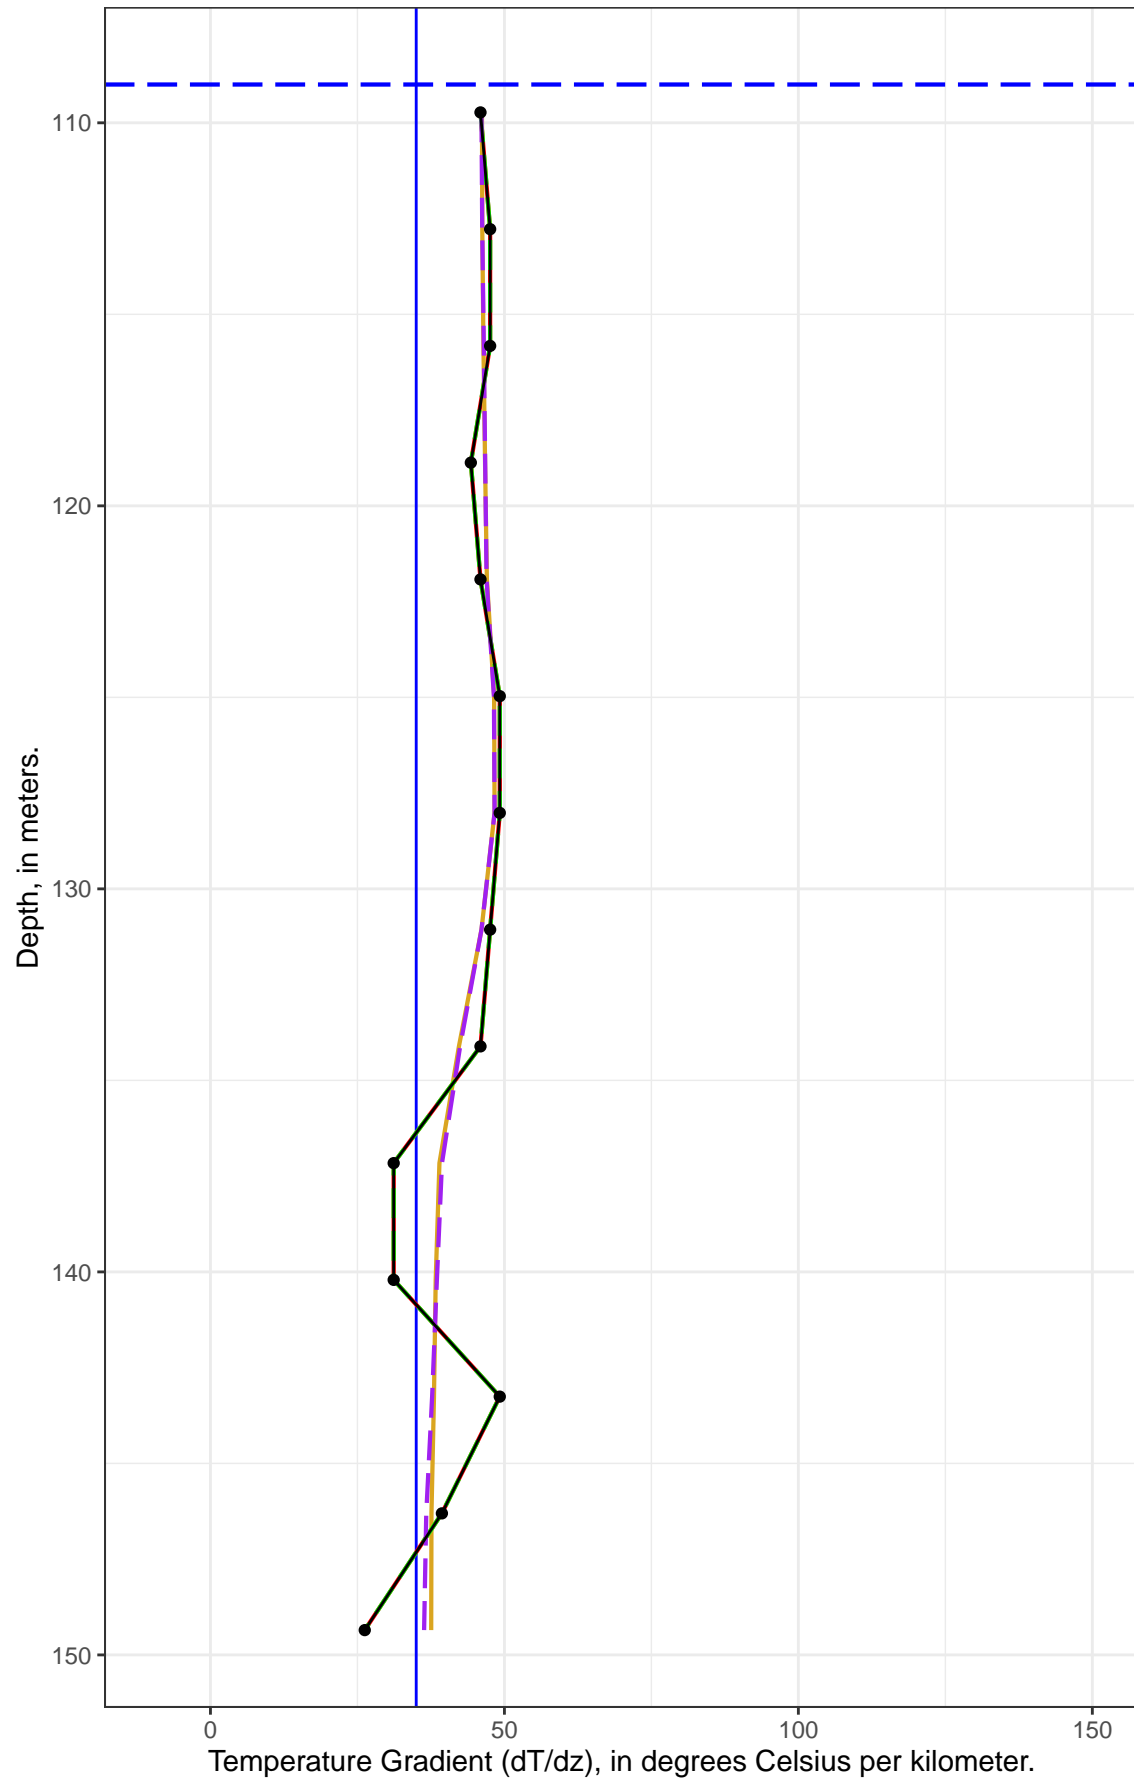

ID: 119 [H-22-76-31\_KILBOURNE\_HOLE] Second Derivative

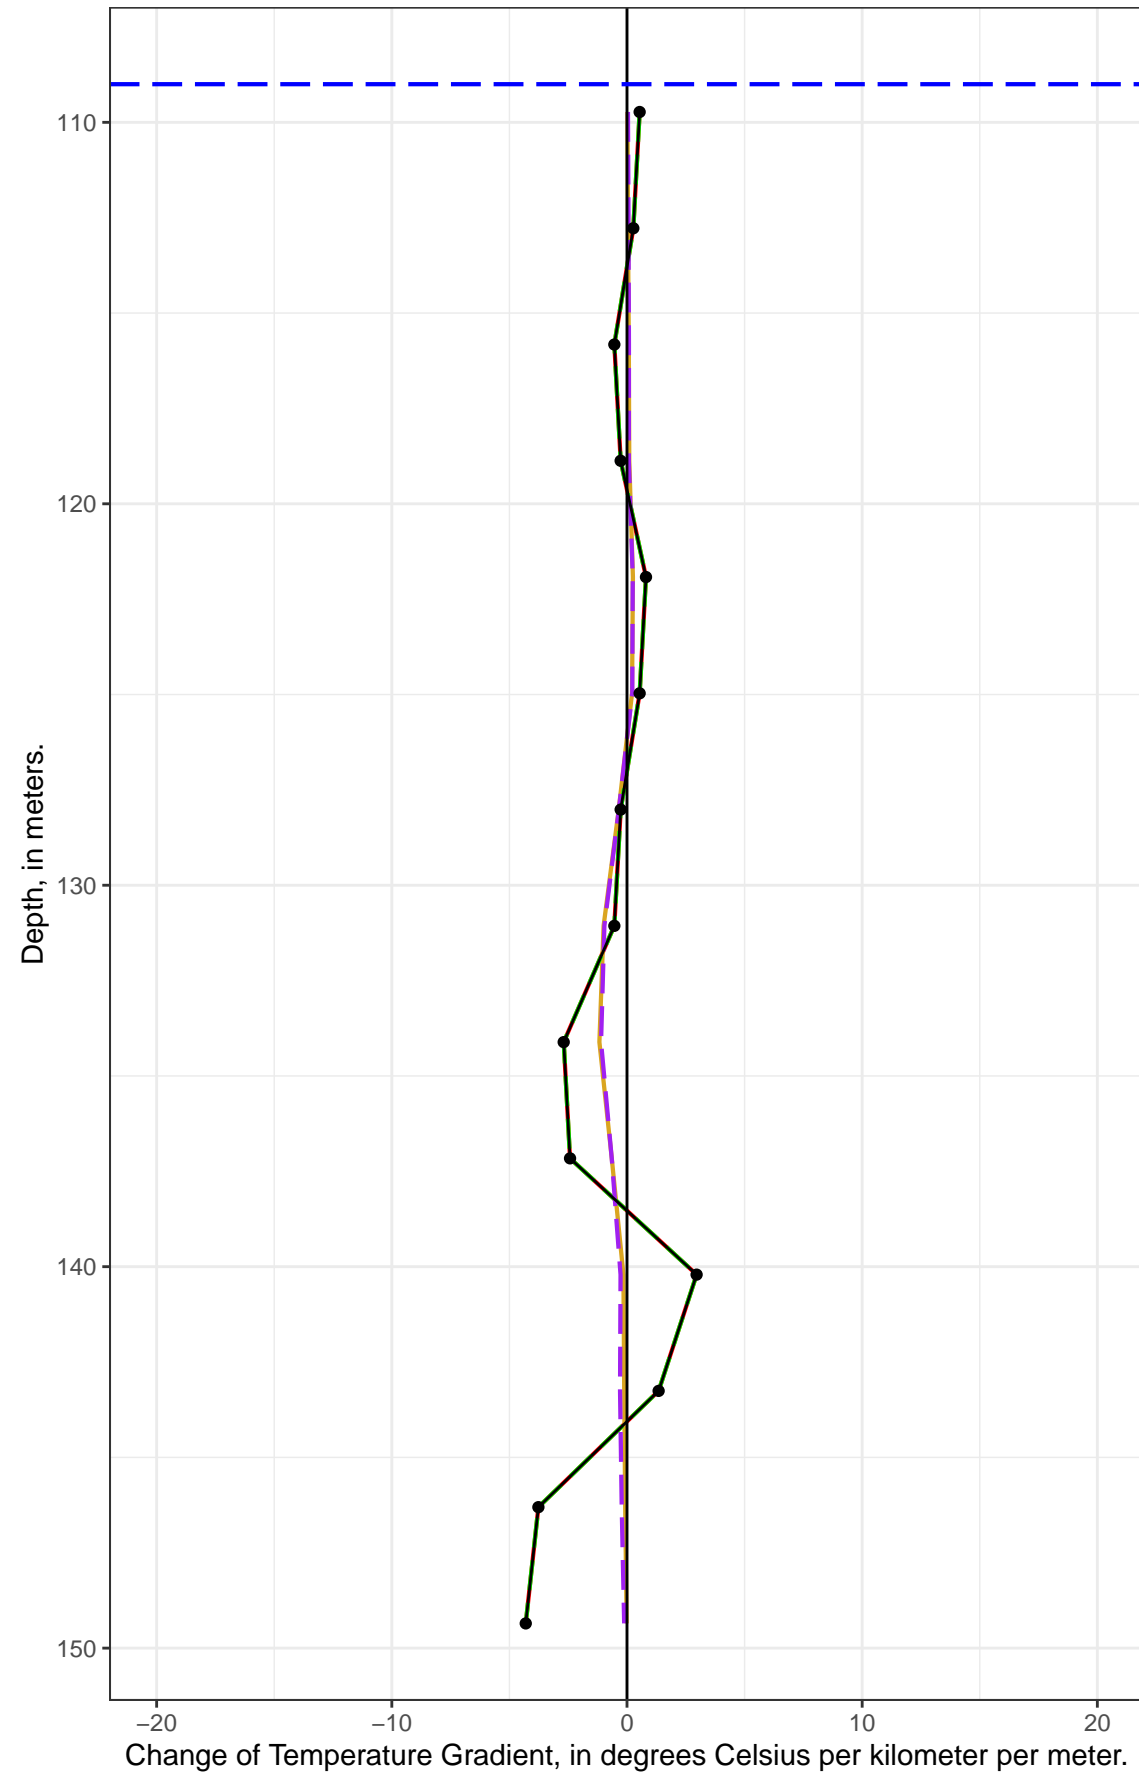

• Data • LOESS (AICC) • LOESS (constant) • LOESS (GCV) • Spline

• Data • LOESS (AICC) • LOESS (constant) • LOESS (GCV) • Spline

• Data • LOESS (AICC) • LOESS (constant) • LOESS (GCV) • Spline

ID: 121 [H-22-76-33\_KILBOURNE\_HOLE] Smoothed Profile

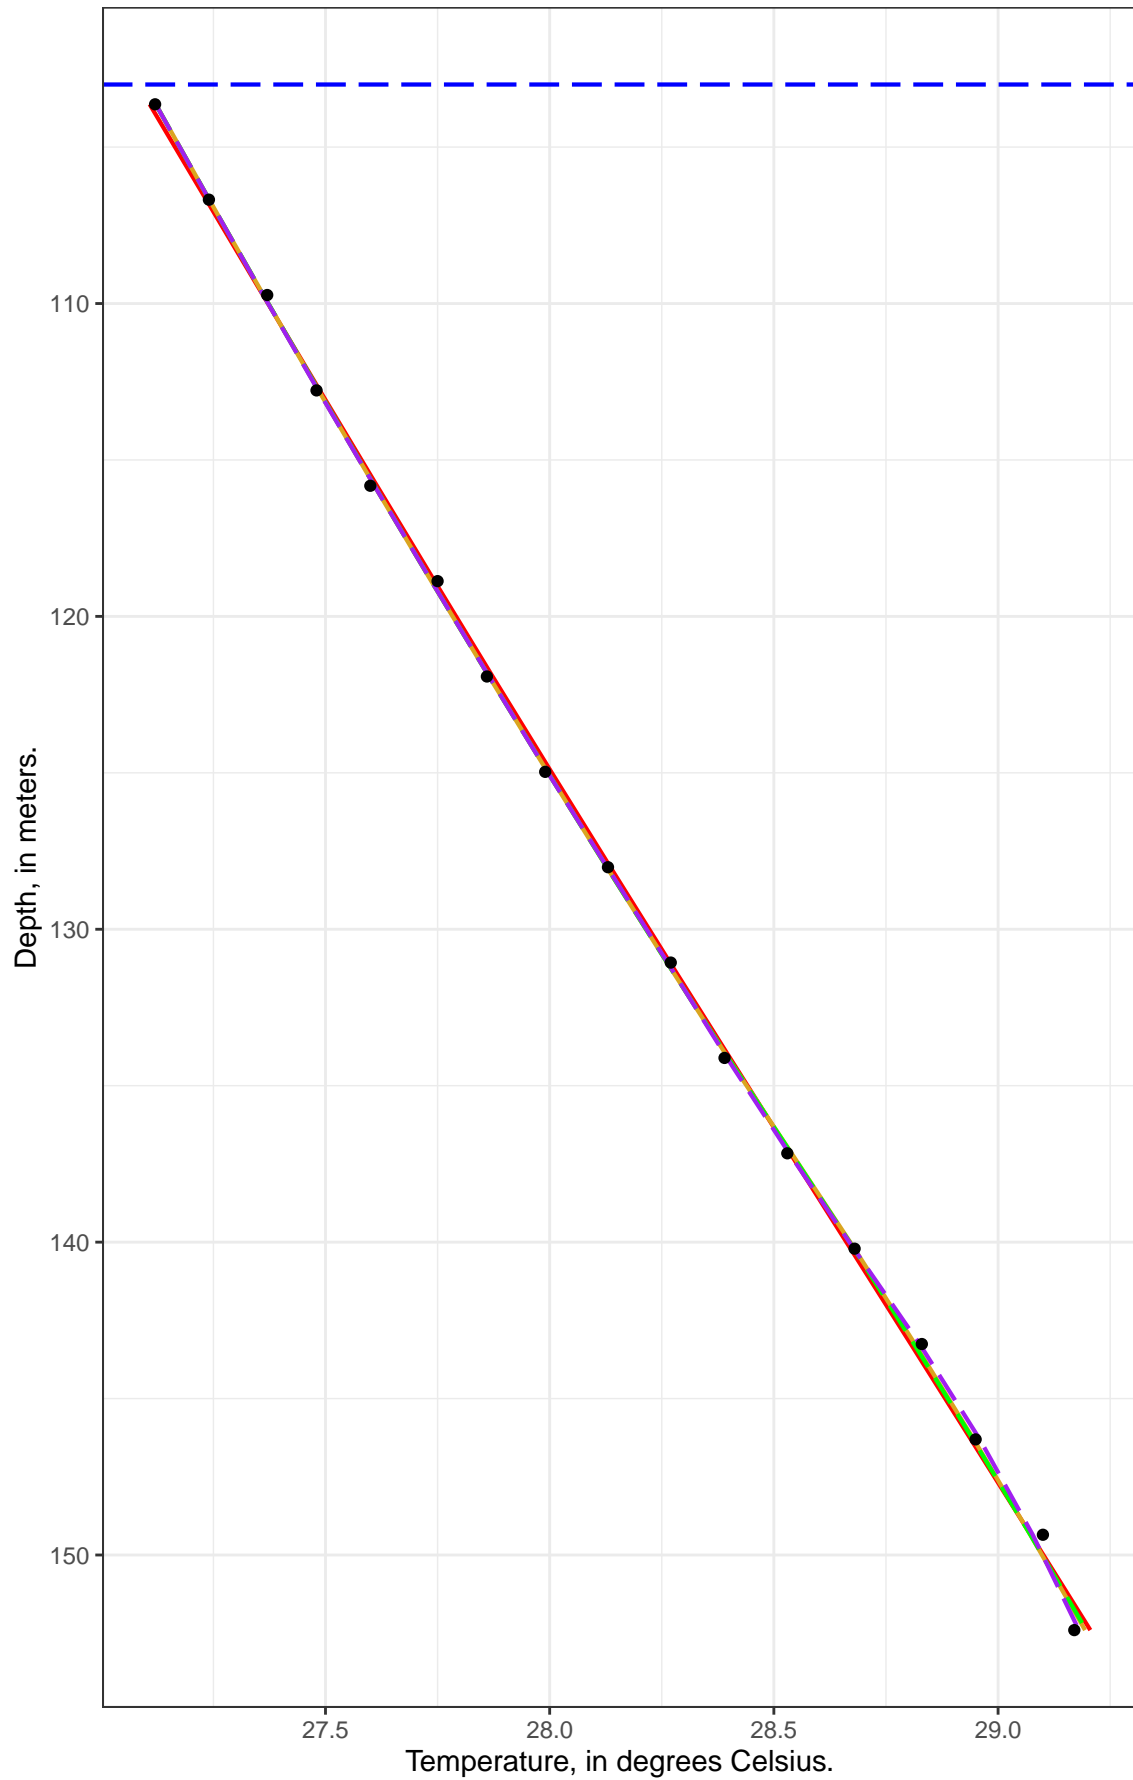

ID: 121 [H-22-76-33\_KILBOURNE\_HOLE] First Derivative

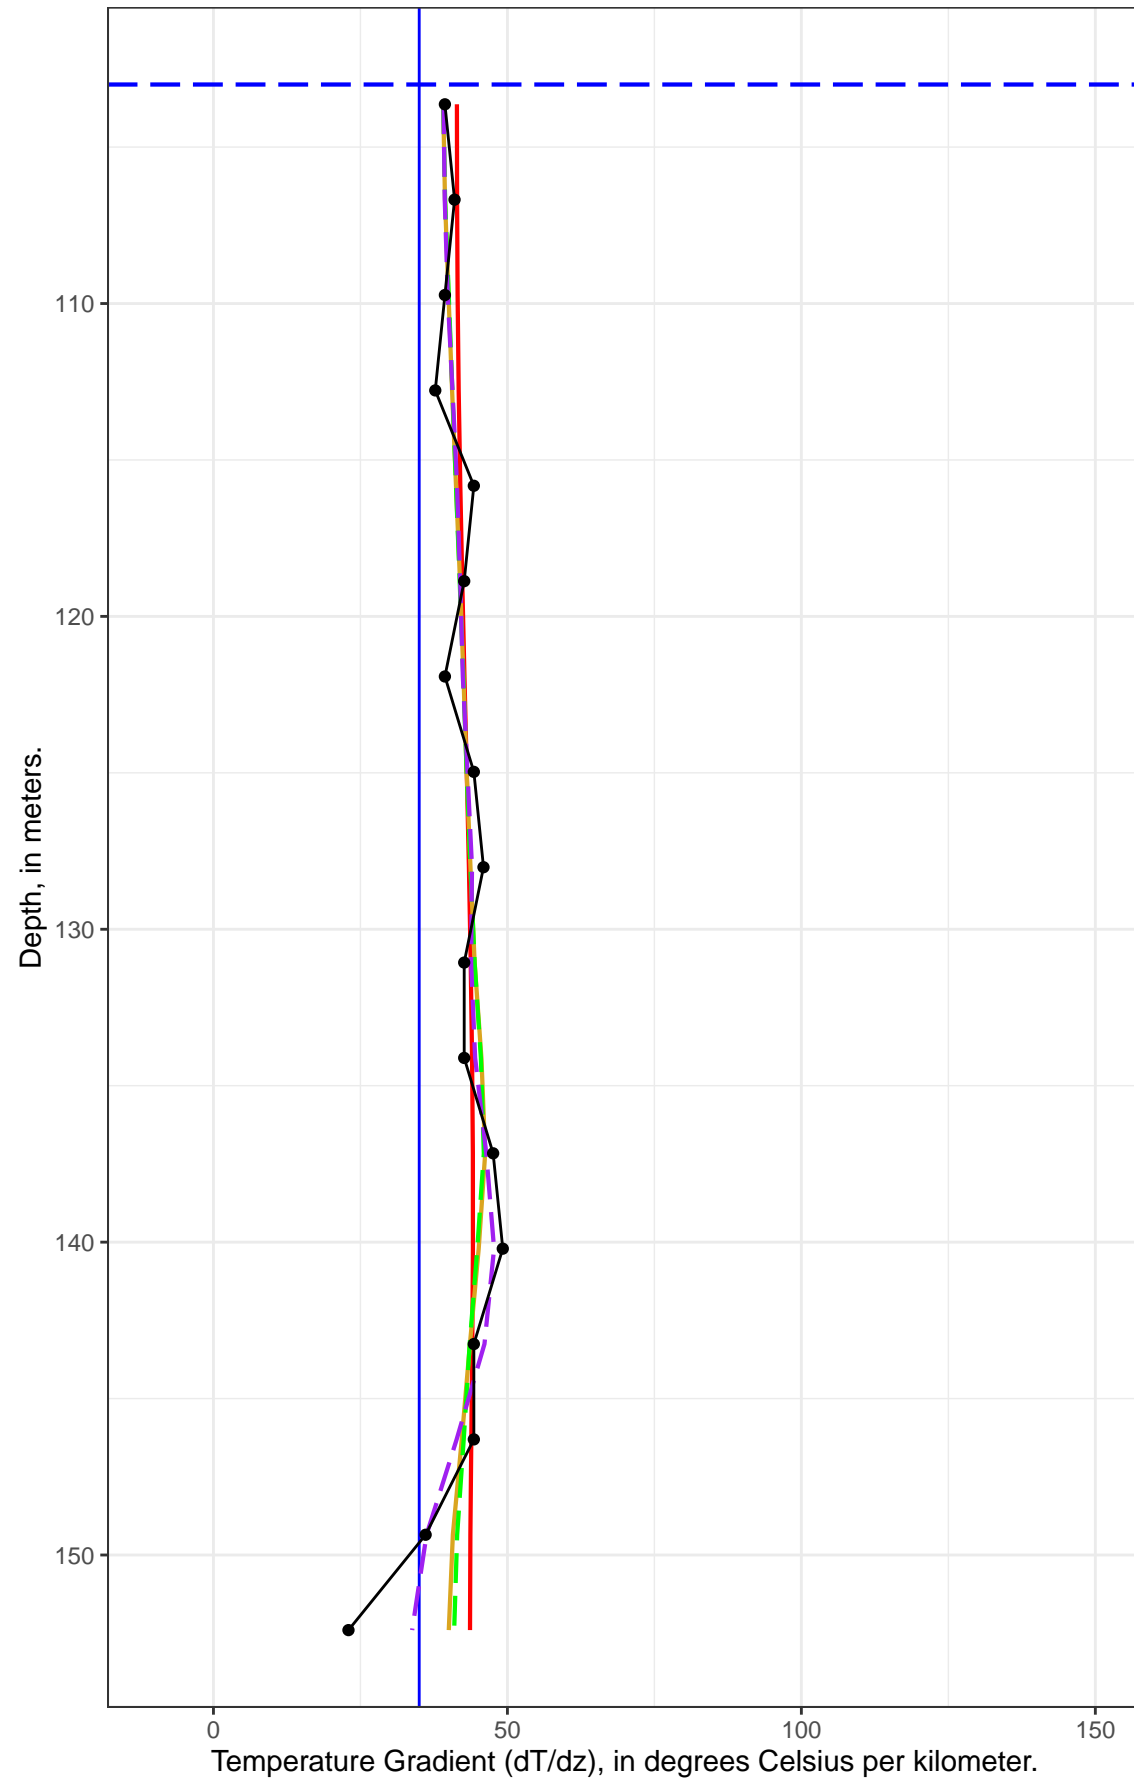

ID: 121 [H-22-76-33\_KILBOURNE\_HOLE] Second Derivative

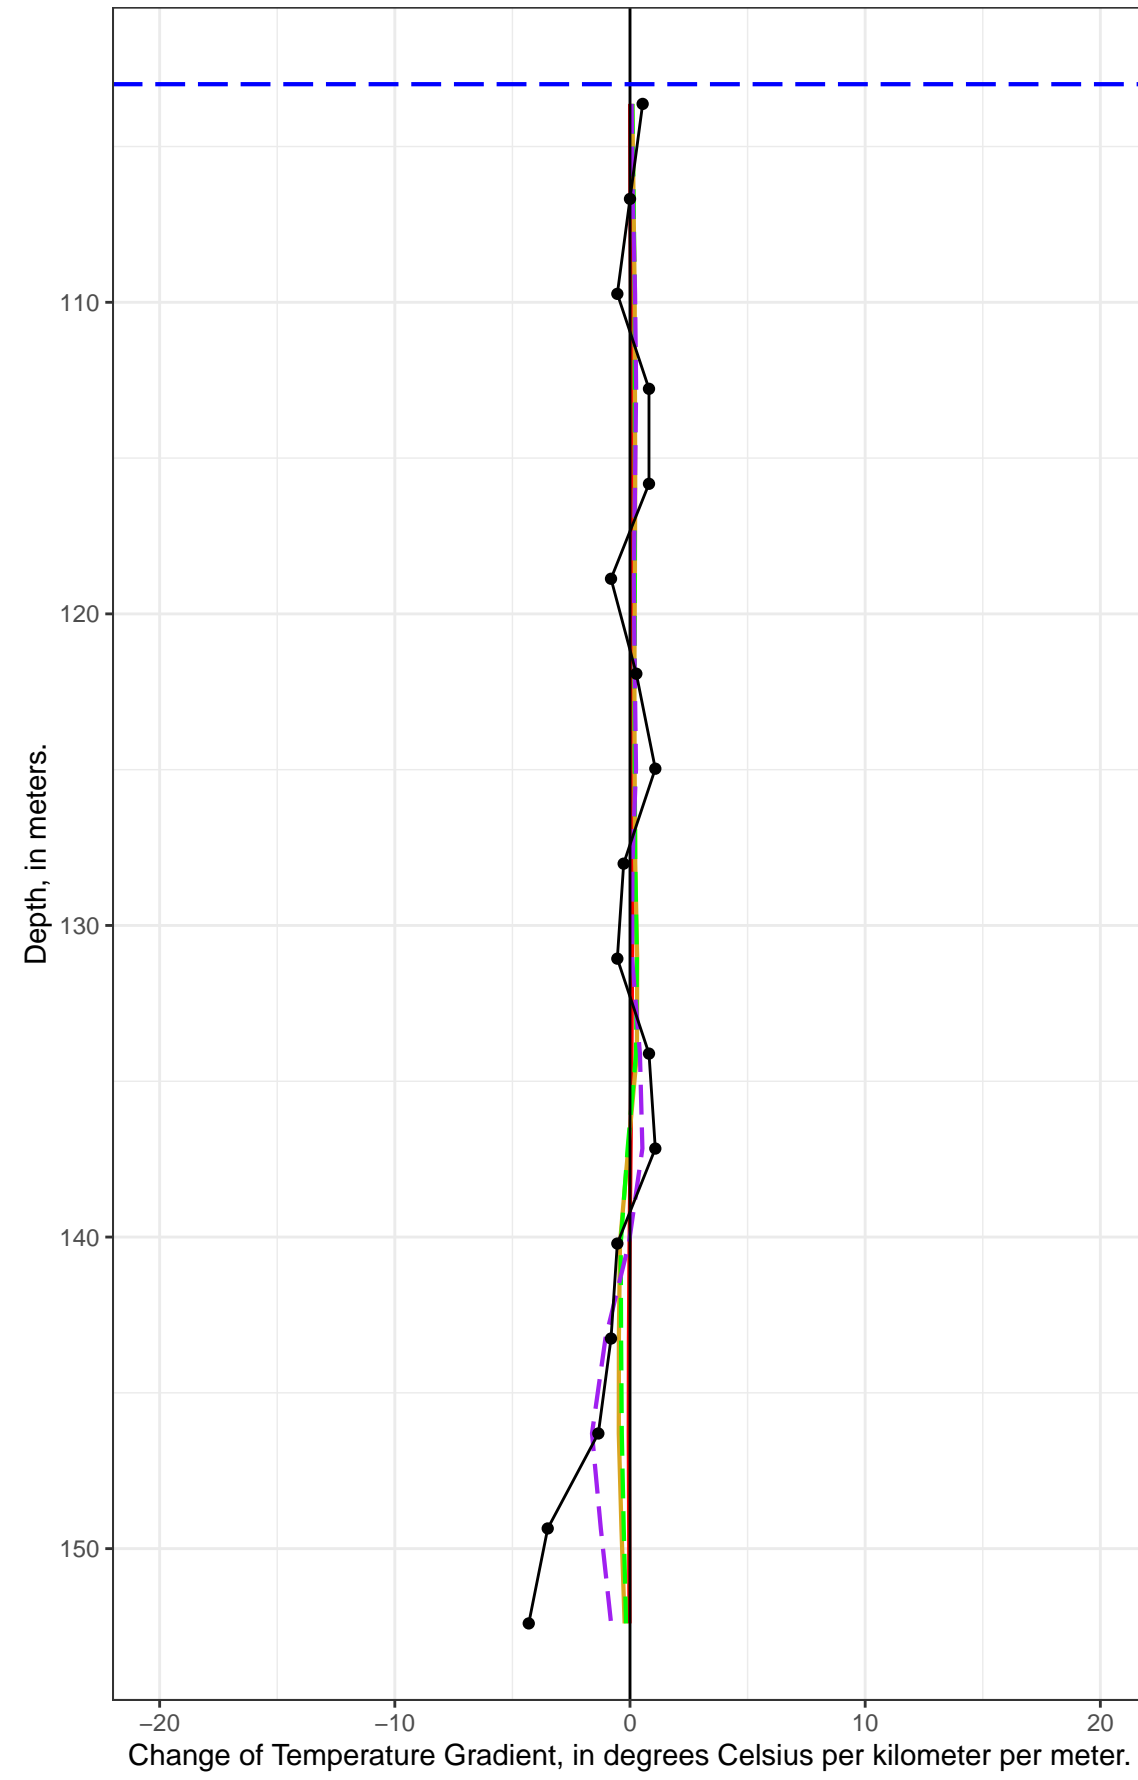

• Data • LOESS (AICC) • LOESS (constant) • LOESS (GCV) • Spline

• Data • LOESS (AICC) • LOESS (constant) • LOESS (GCV) • Spline

• Data • LOESS (AICC) • LOESS (constant) • LOESS (GCV) • Spline



ID: 126 [H-22-76-43\_KILBOURNE\_HOLE] Smoothed Profile

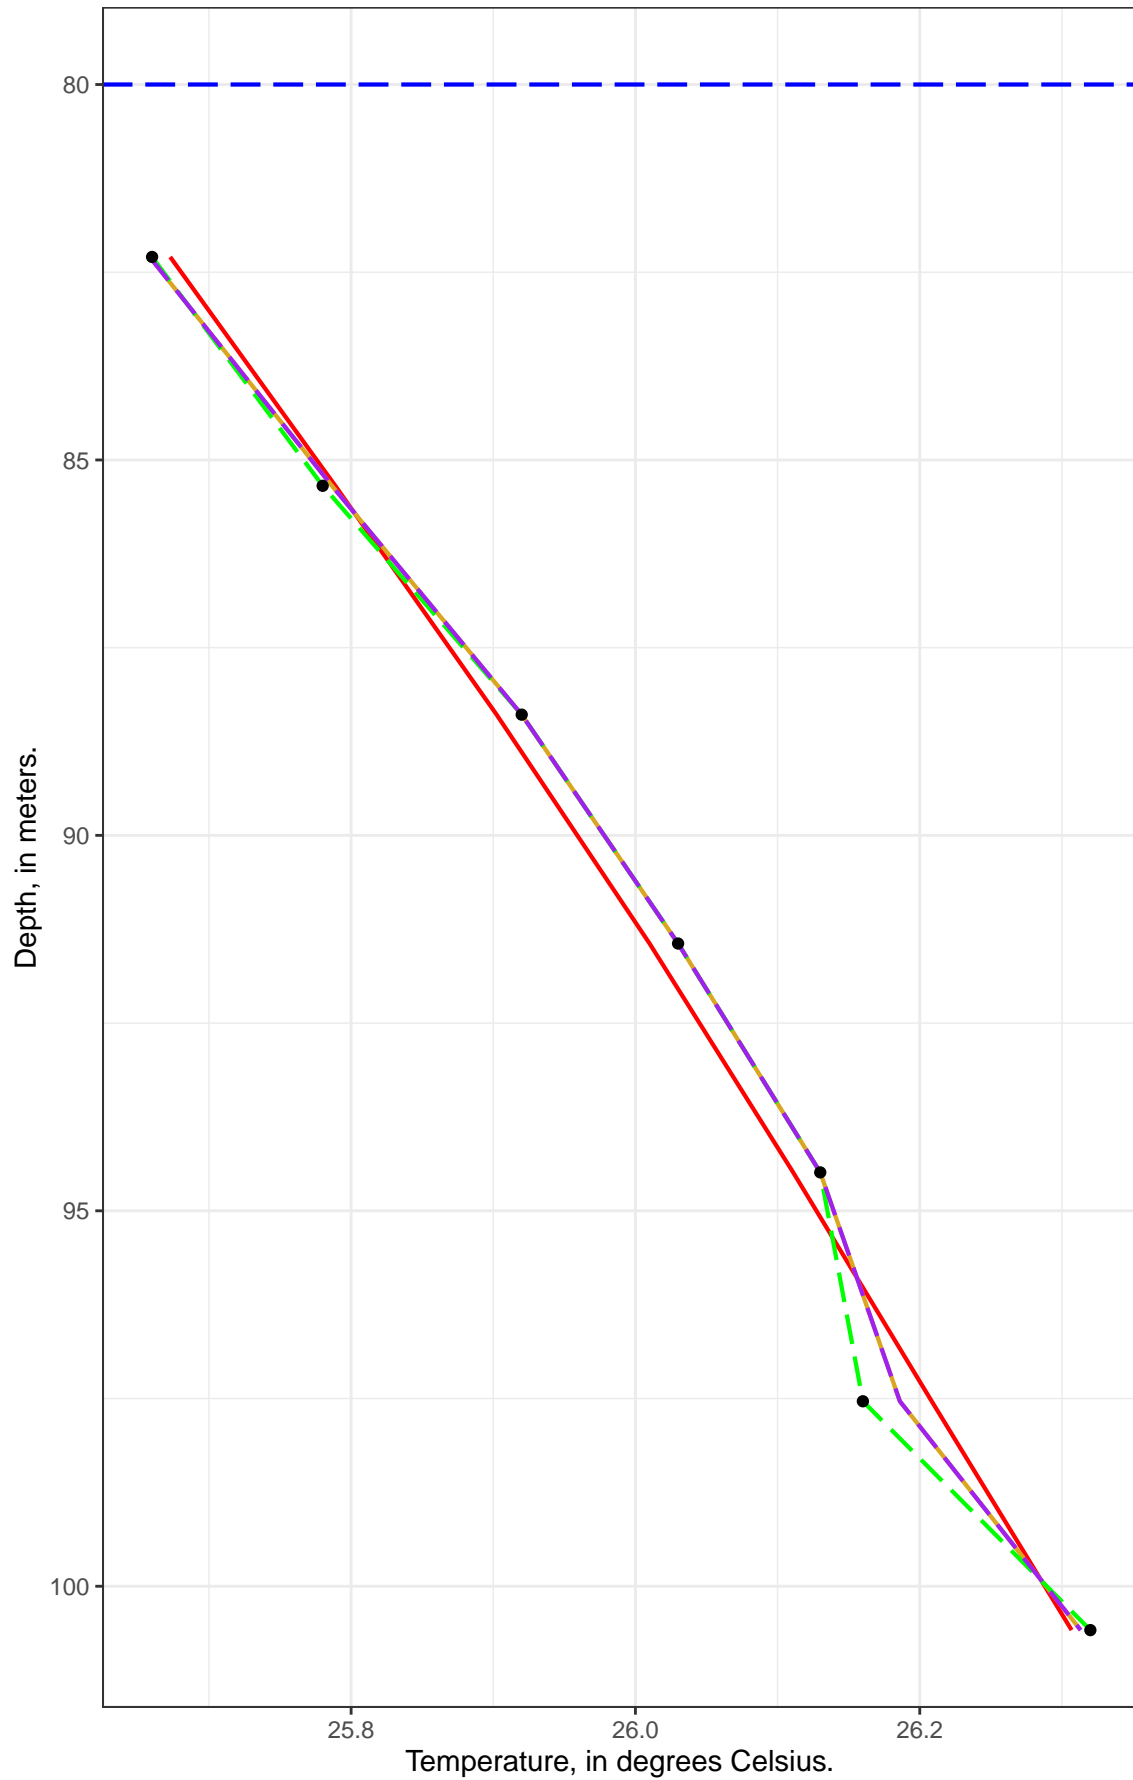

ID: 126 [H-22-76-43\_KILBOURNE\_HOLE] First Derivative

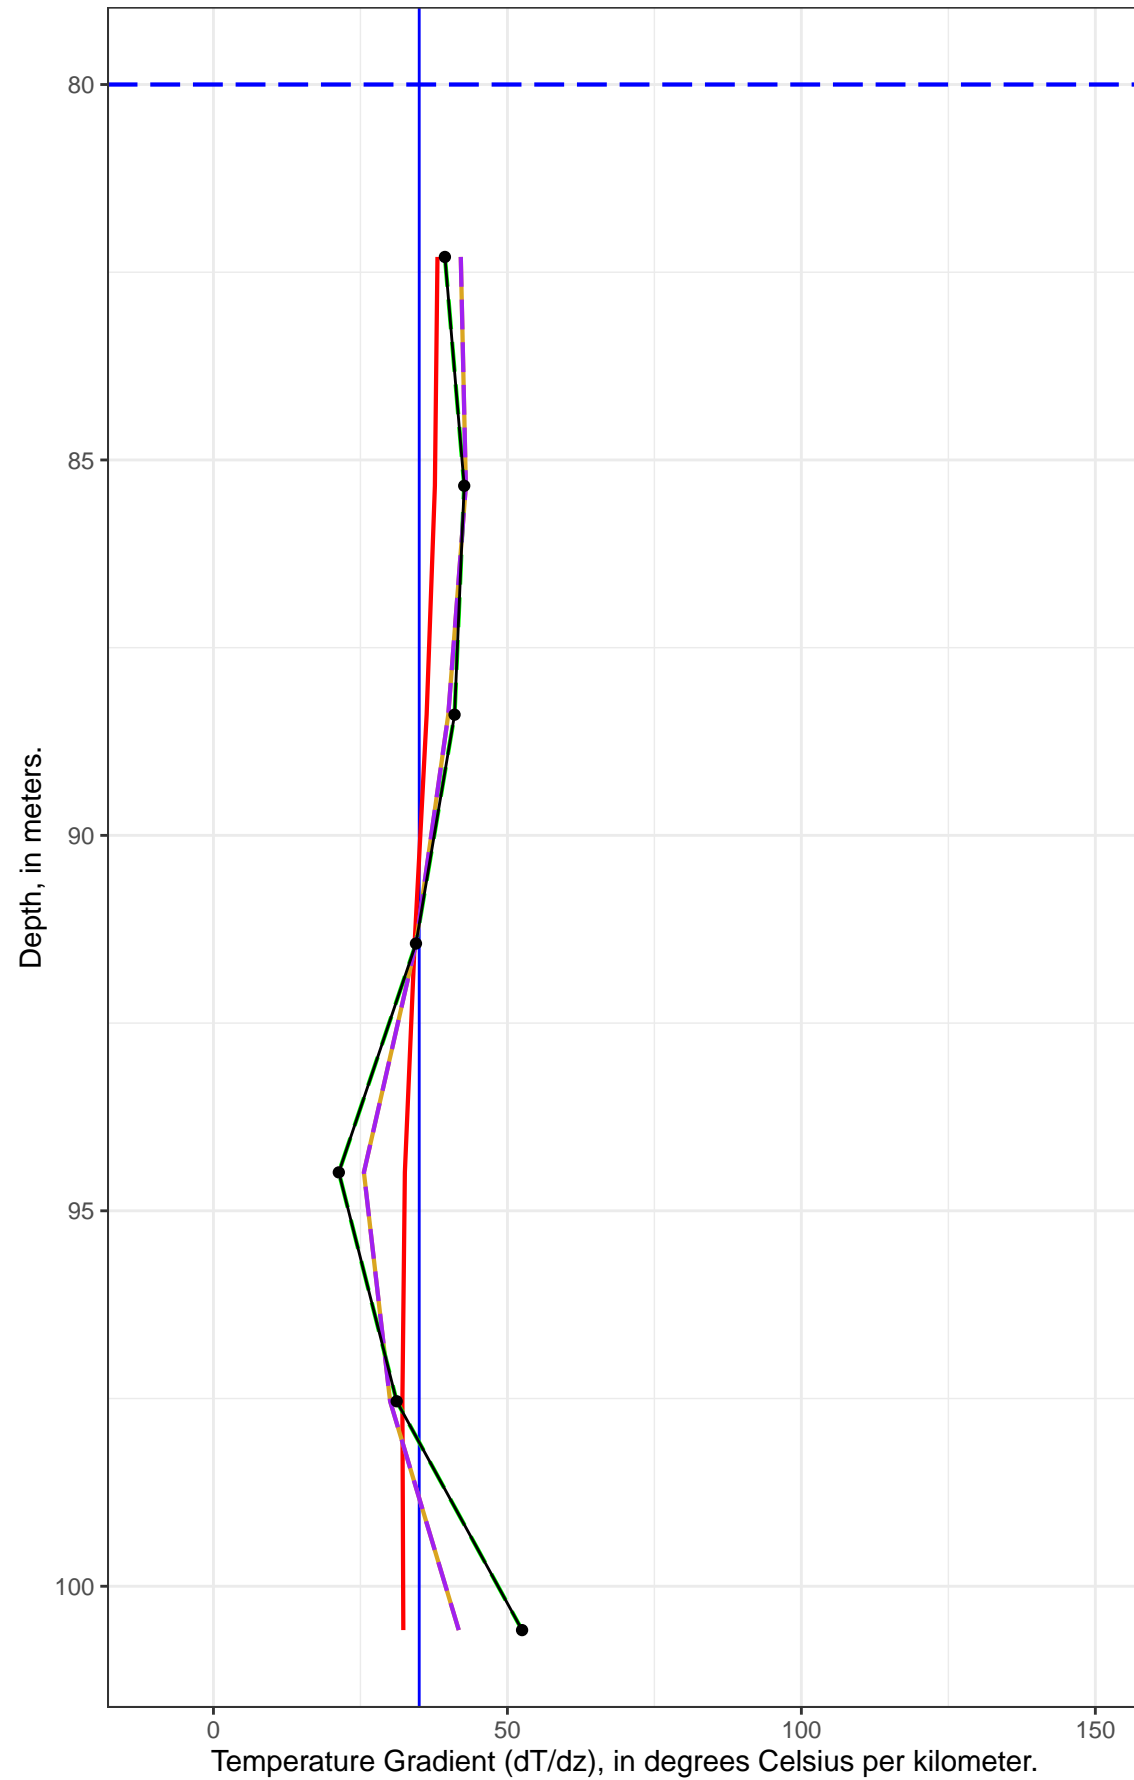

ID: 126 [H-22-76-43\_KILBOURNE\_HOLE] Second Derivative

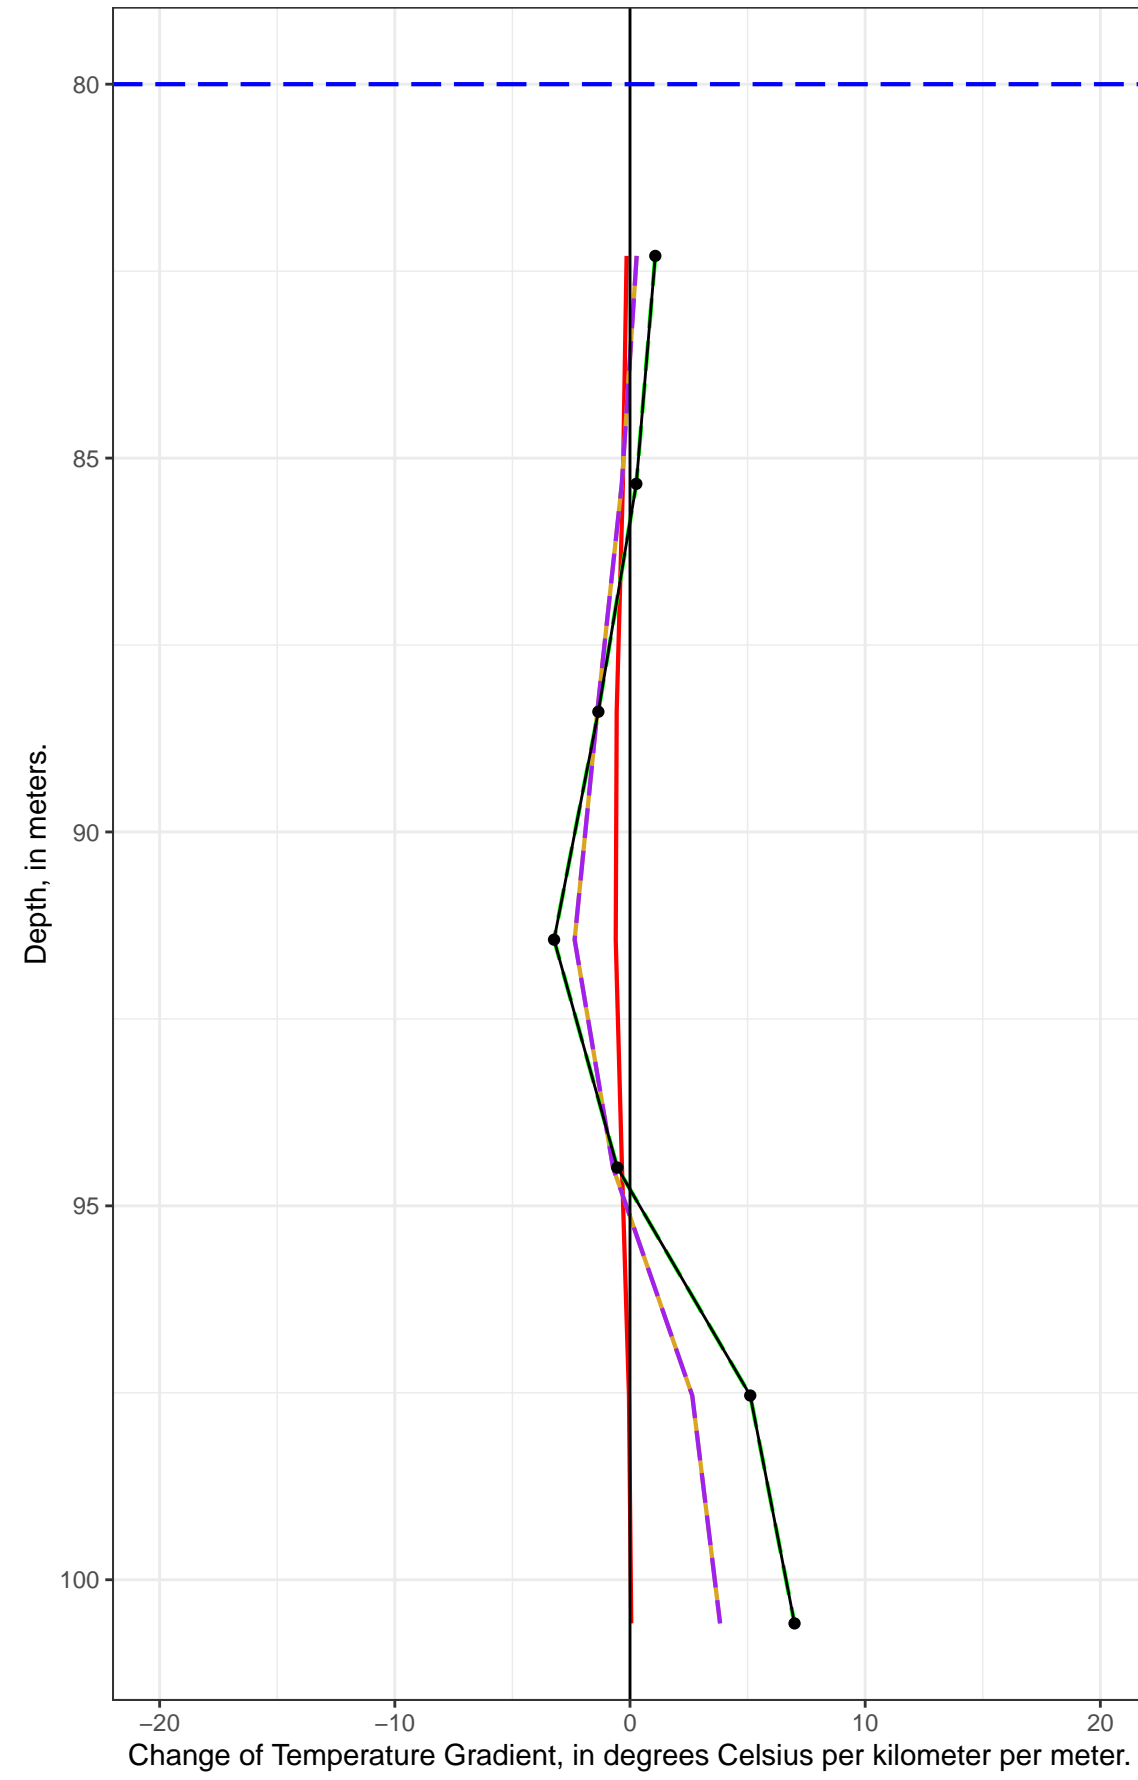

• Data — LOESS (AICC) — LOESS (constant) — LOESS (GCV) — Spline

• Data — LOESS (AICC) — LOESS (constant) — LOESS (GCV) — Spline

• Data — LOESS (AICC) — LOESS (constant) — LOESS (GCV) — Spline

ID: 129 [H-22-76-49\_KILBOURNE\_HOLE] Smoothed Profile

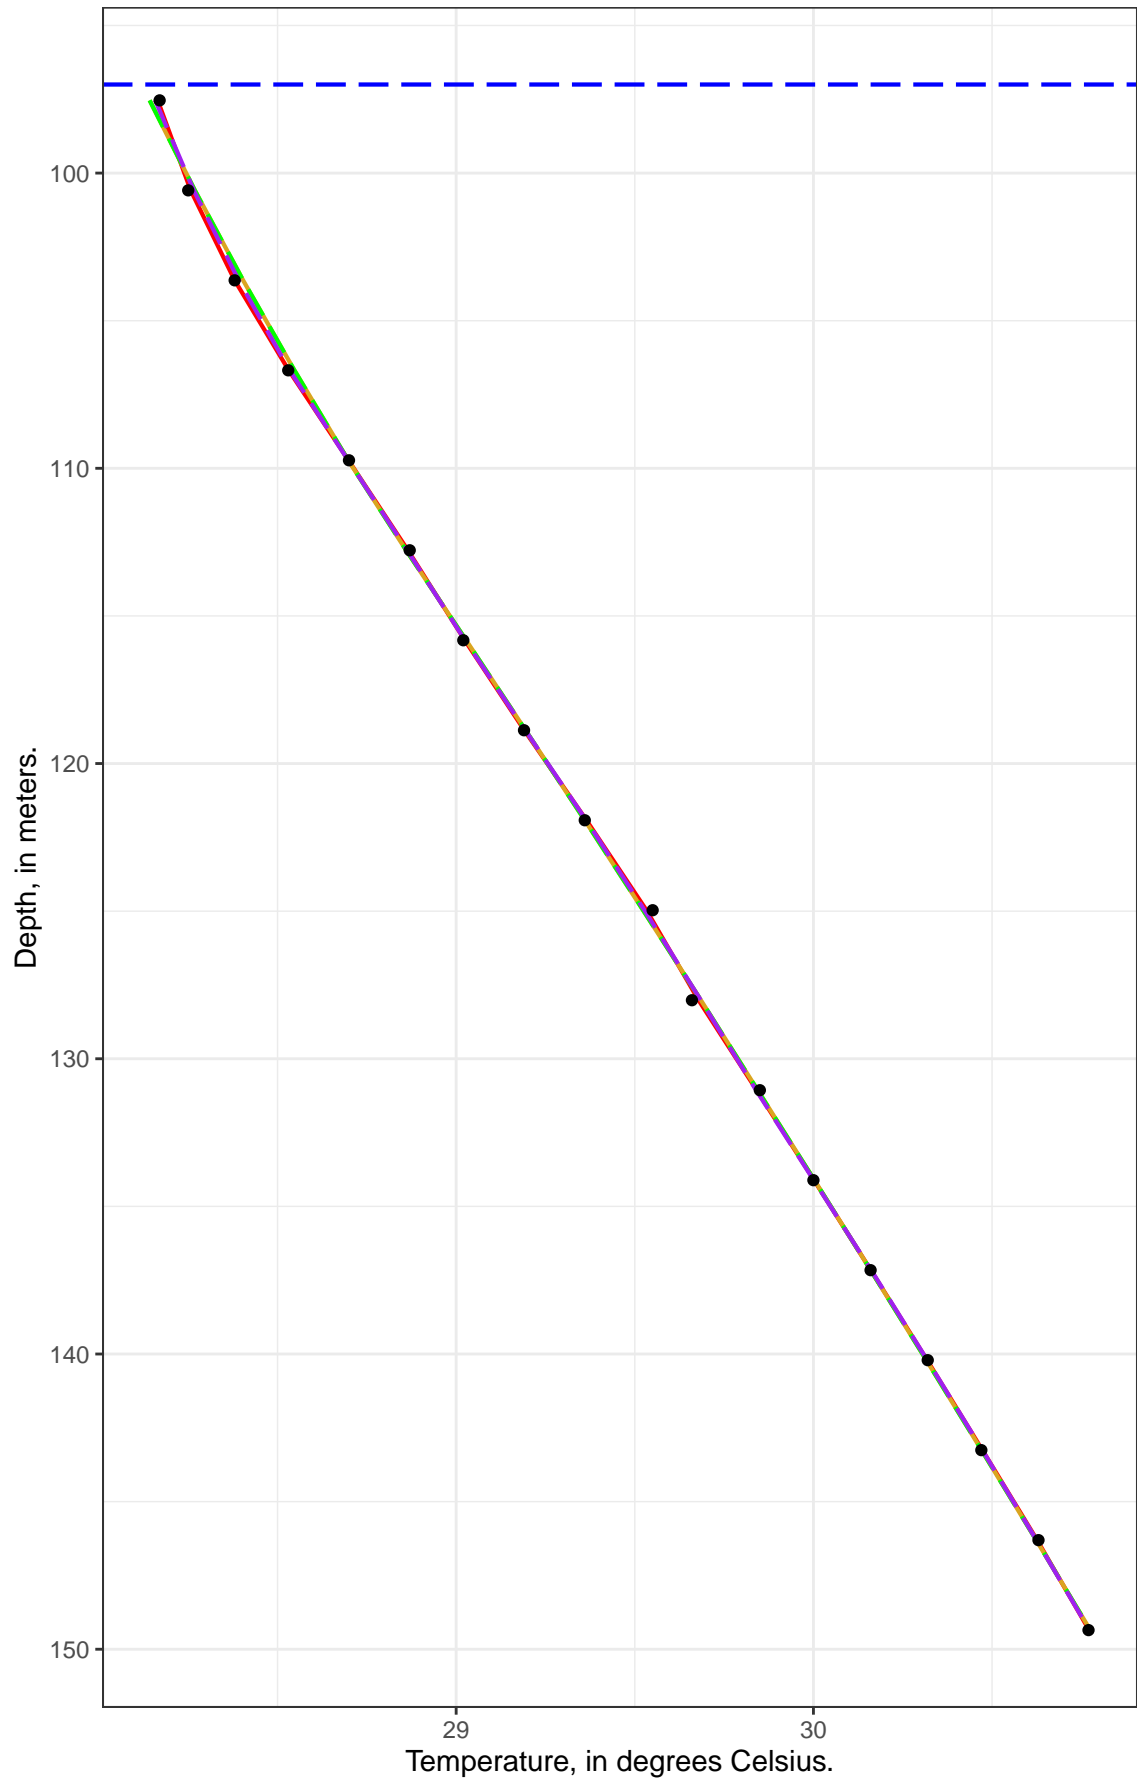

ID: 129 [H-22-76-49\_KILBOURNE\_HOLE] First Derivative

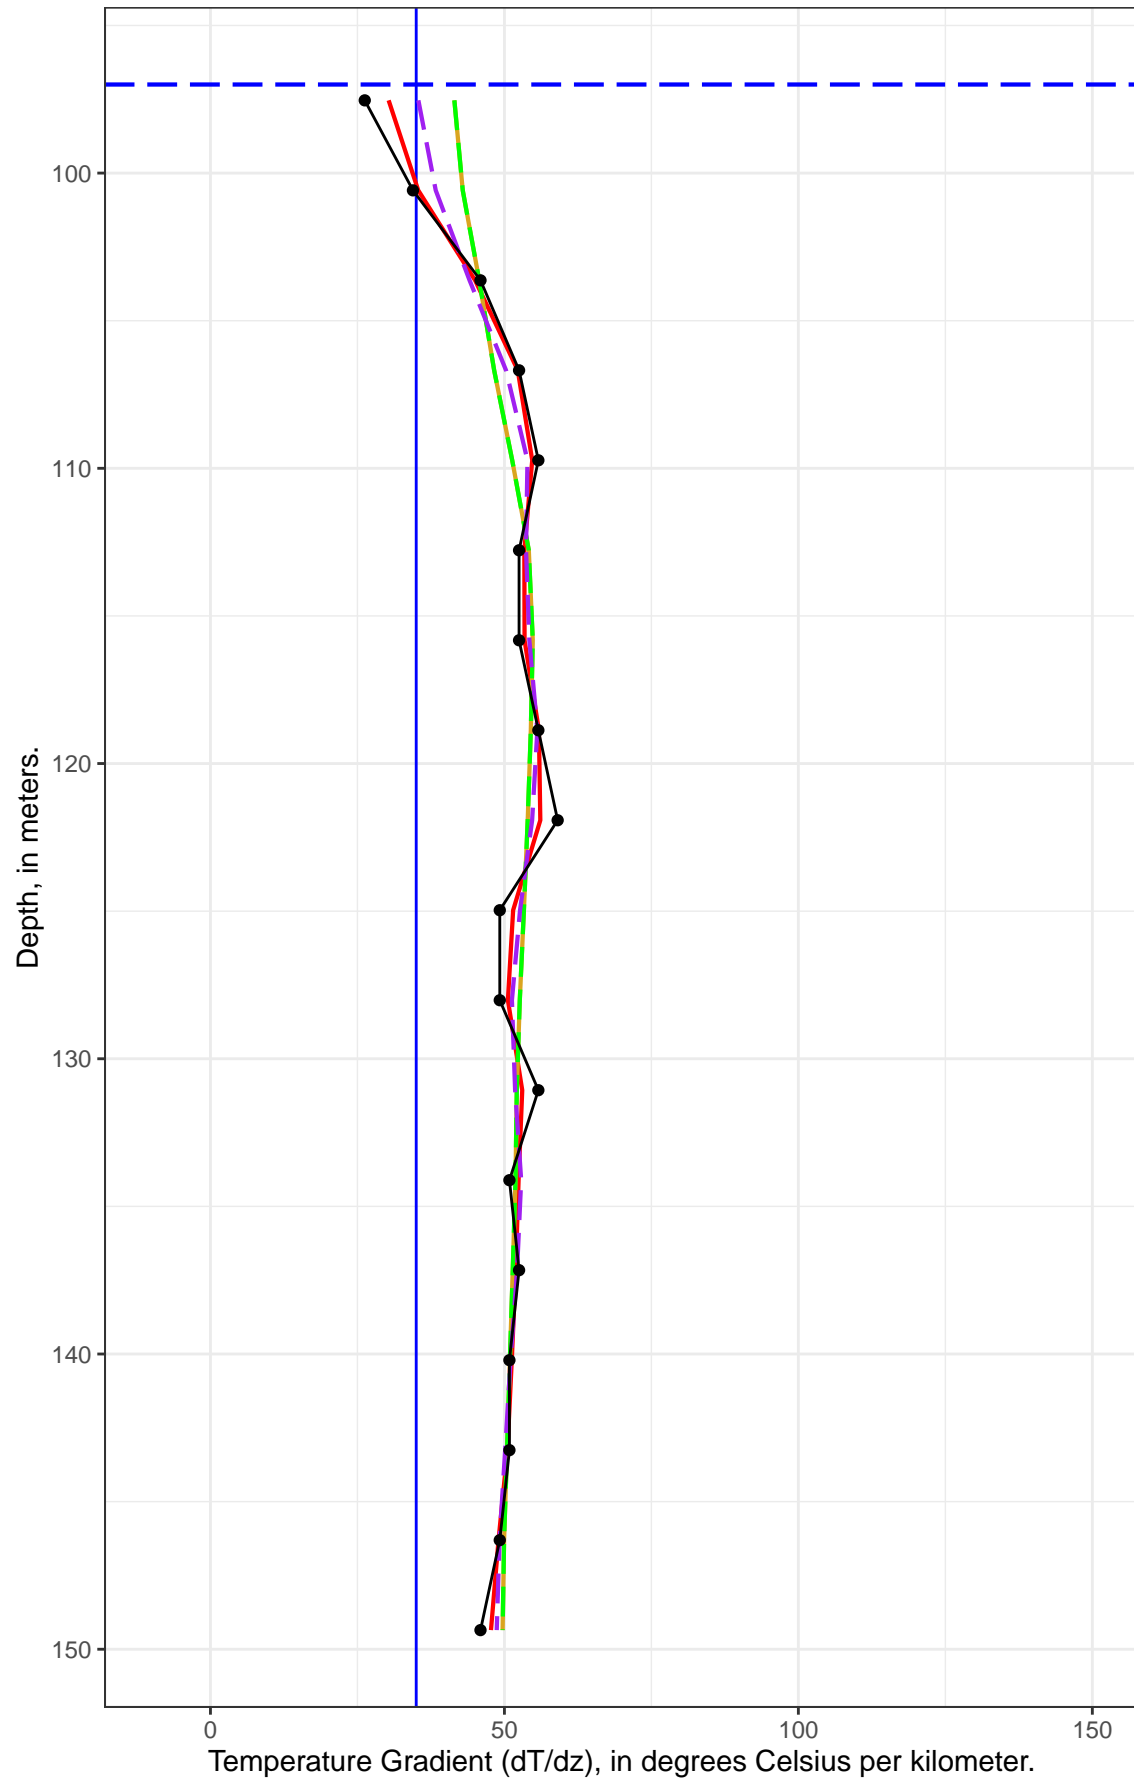

ID: 129 [H-22-76-49\_KILBOURNE\_HOLE] Second Derivative

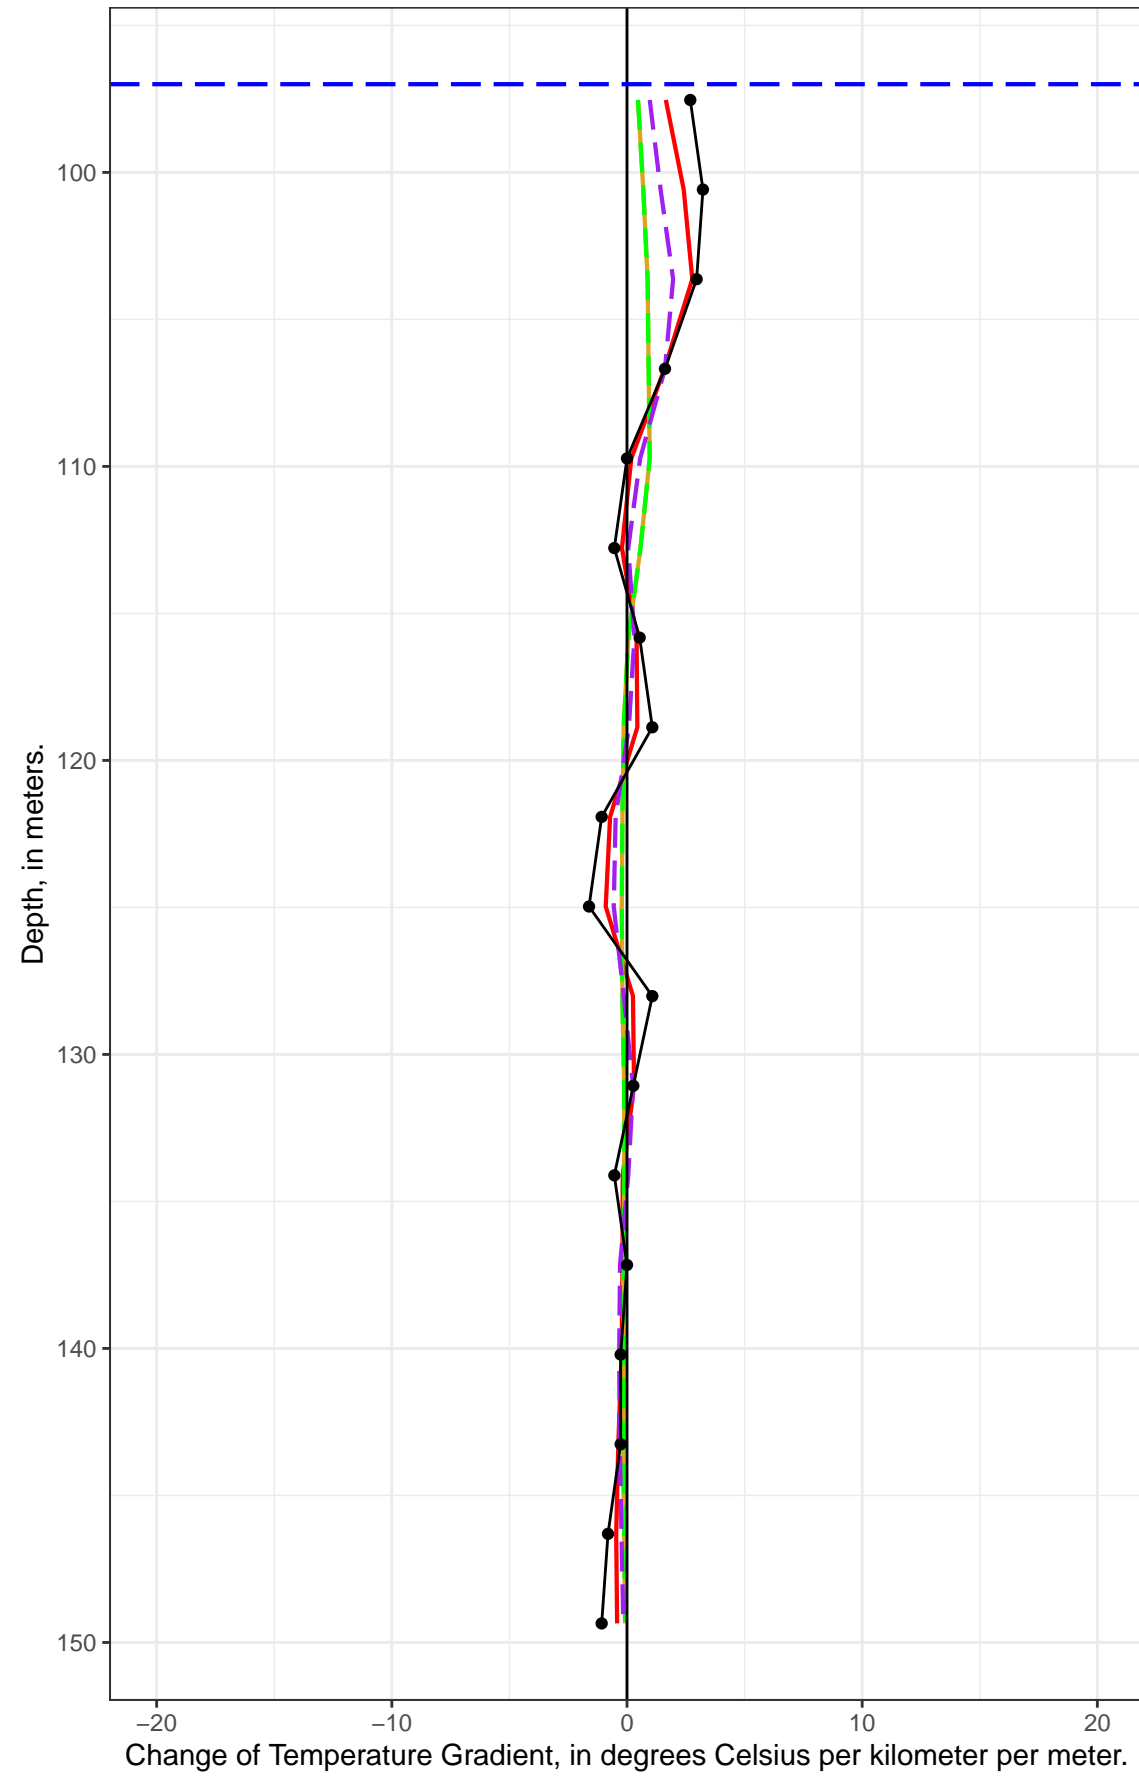

• Data • LOESS (AICC) • LOESS (constant) • LOESS (GCV) • Spline

• Data • LOESS (AICC) • LOESS (constant) • LOESS (GCV) • Spline

• Data • LOESS (AICC) • LOESS (constant) • LOESS (GCV) • Spline

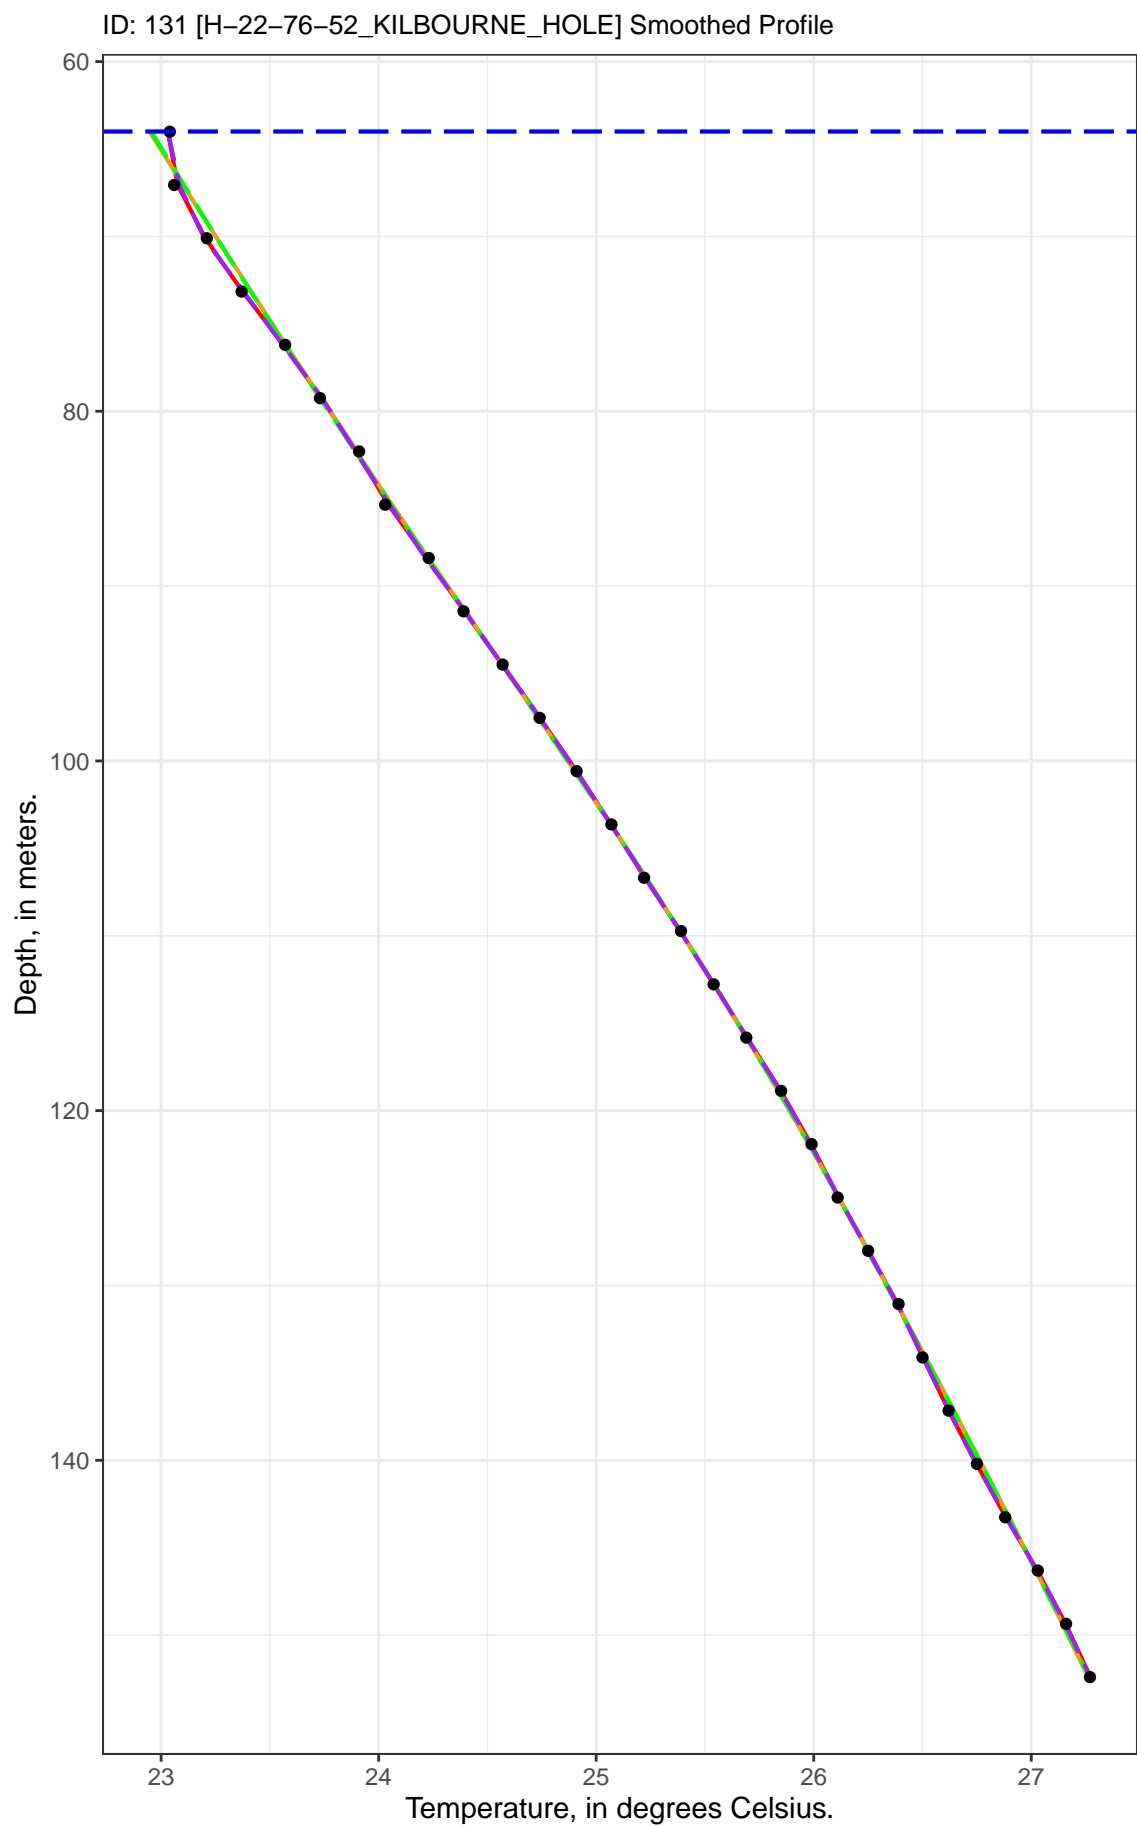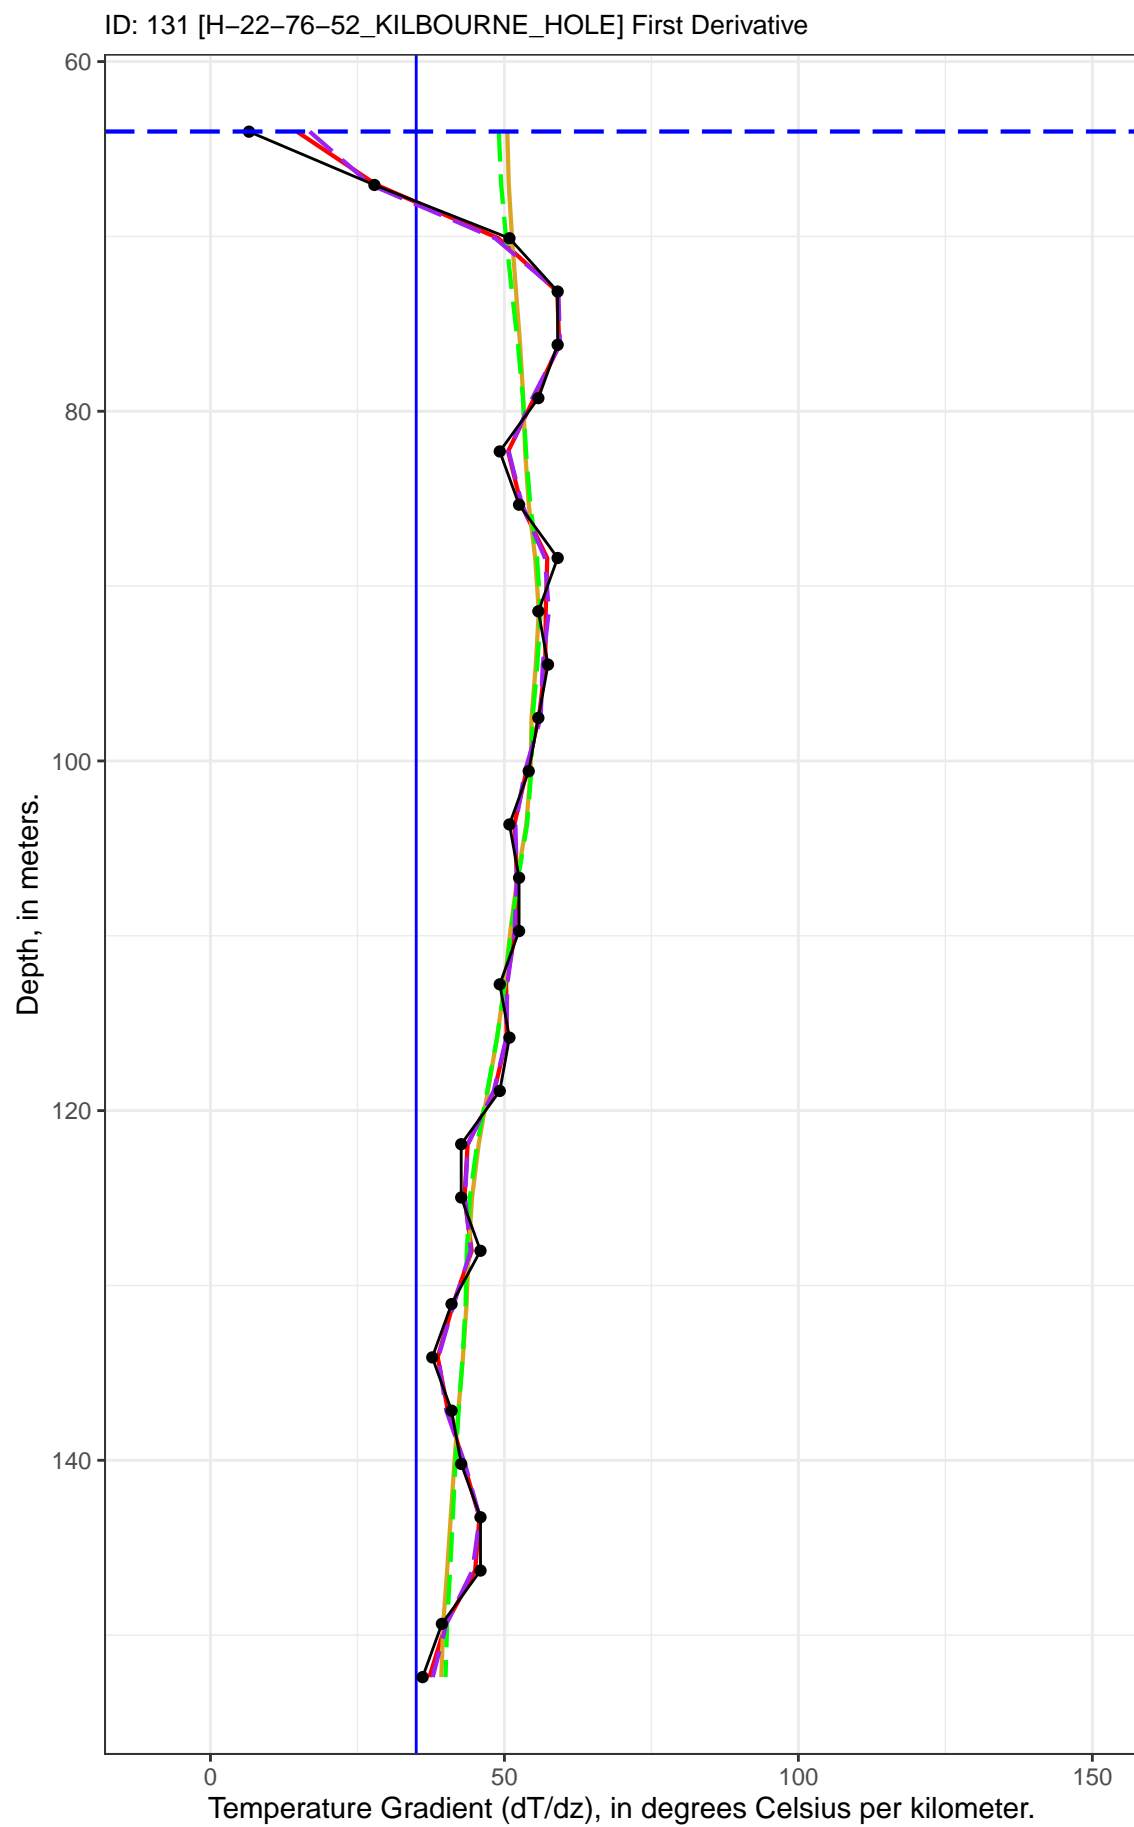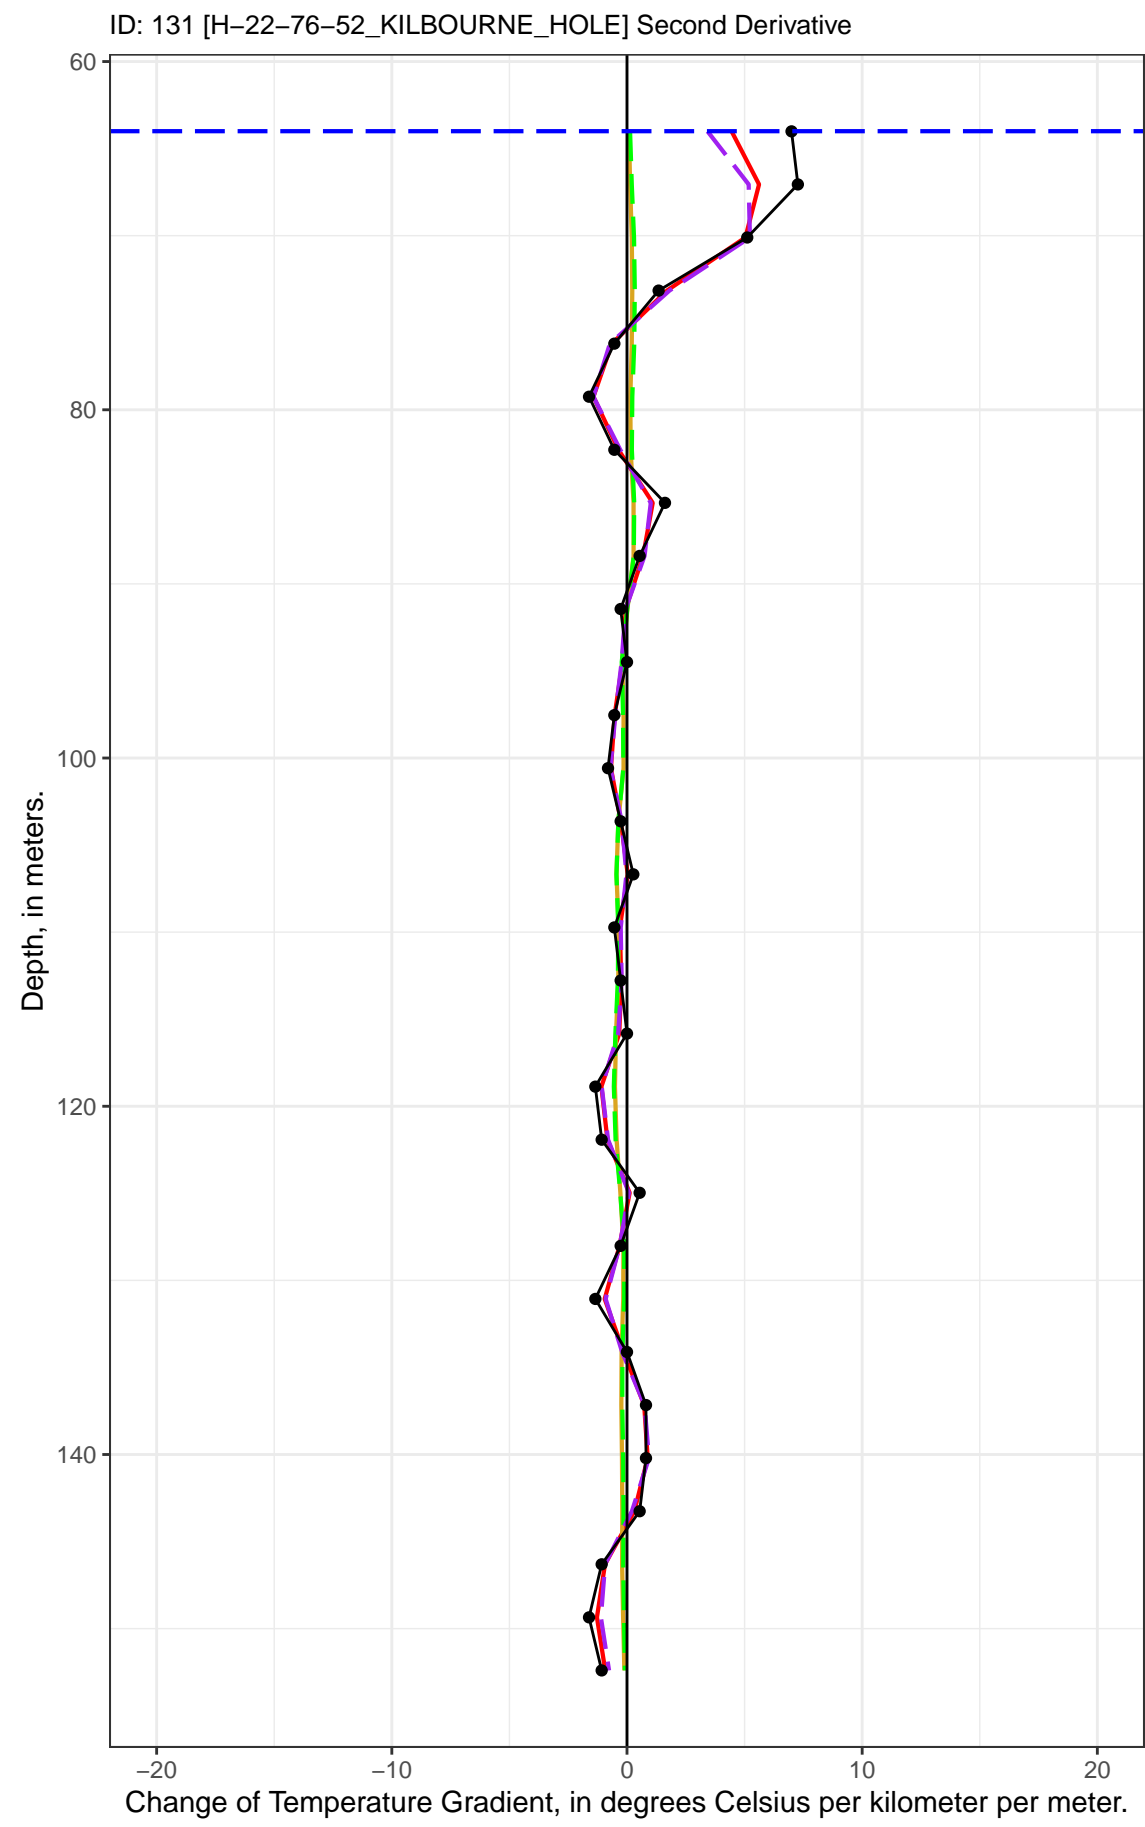

• Data — LOESS (AICC) — LOESS (constant) — LOESS (GCV) — Spline

• Data — LOESS (AICC) — LOESS (constant) — LOESS (GCV) — Spline

• Data — LOESS (AICC) — LOESS (constant) — LOESS (GCV) — Spline

ID: 132 [H-22-76-53\_KILBOURNE\_HOLE] Smoothed Profile

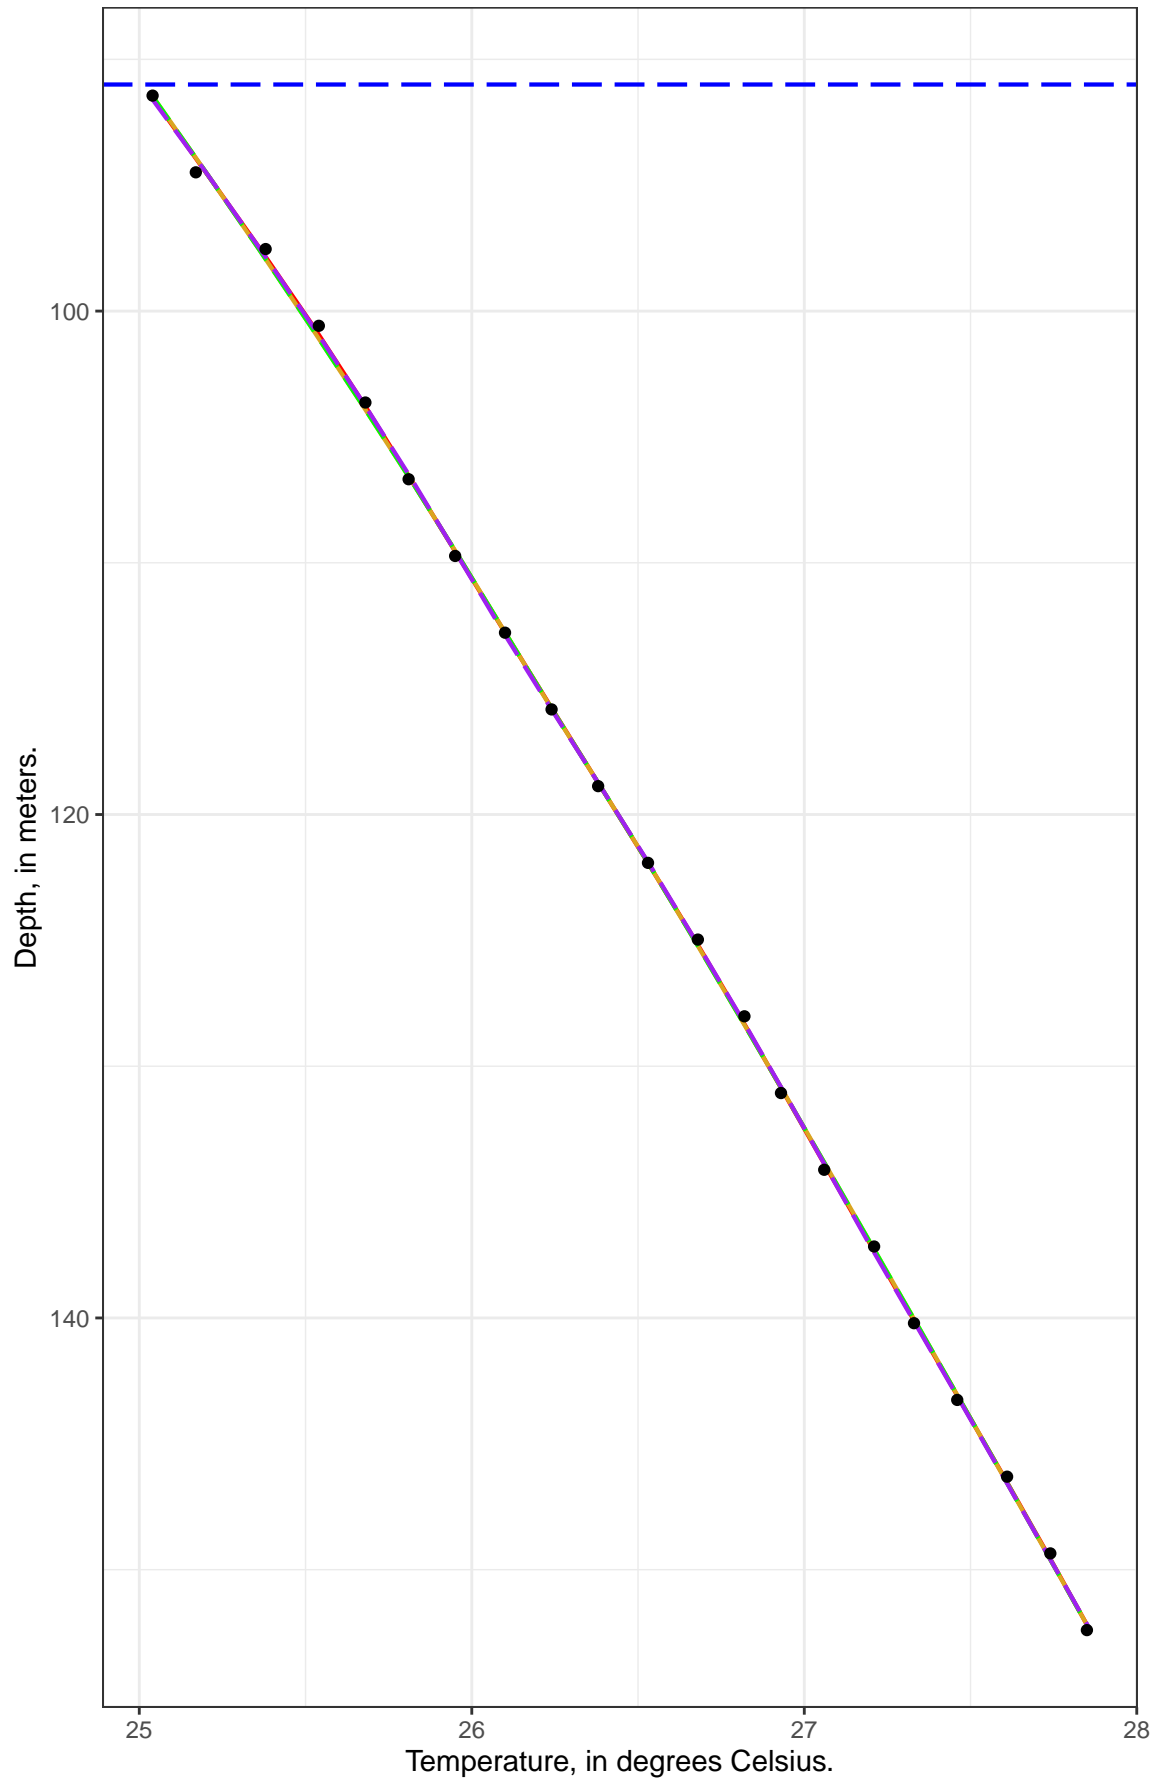

• Data — LOESS (AICC) — LOESS (constant) — LOESS (GCV) — Spline

ID: 132 [H-22-76-53\_KILBOURNE\_HOLE] First Derivative

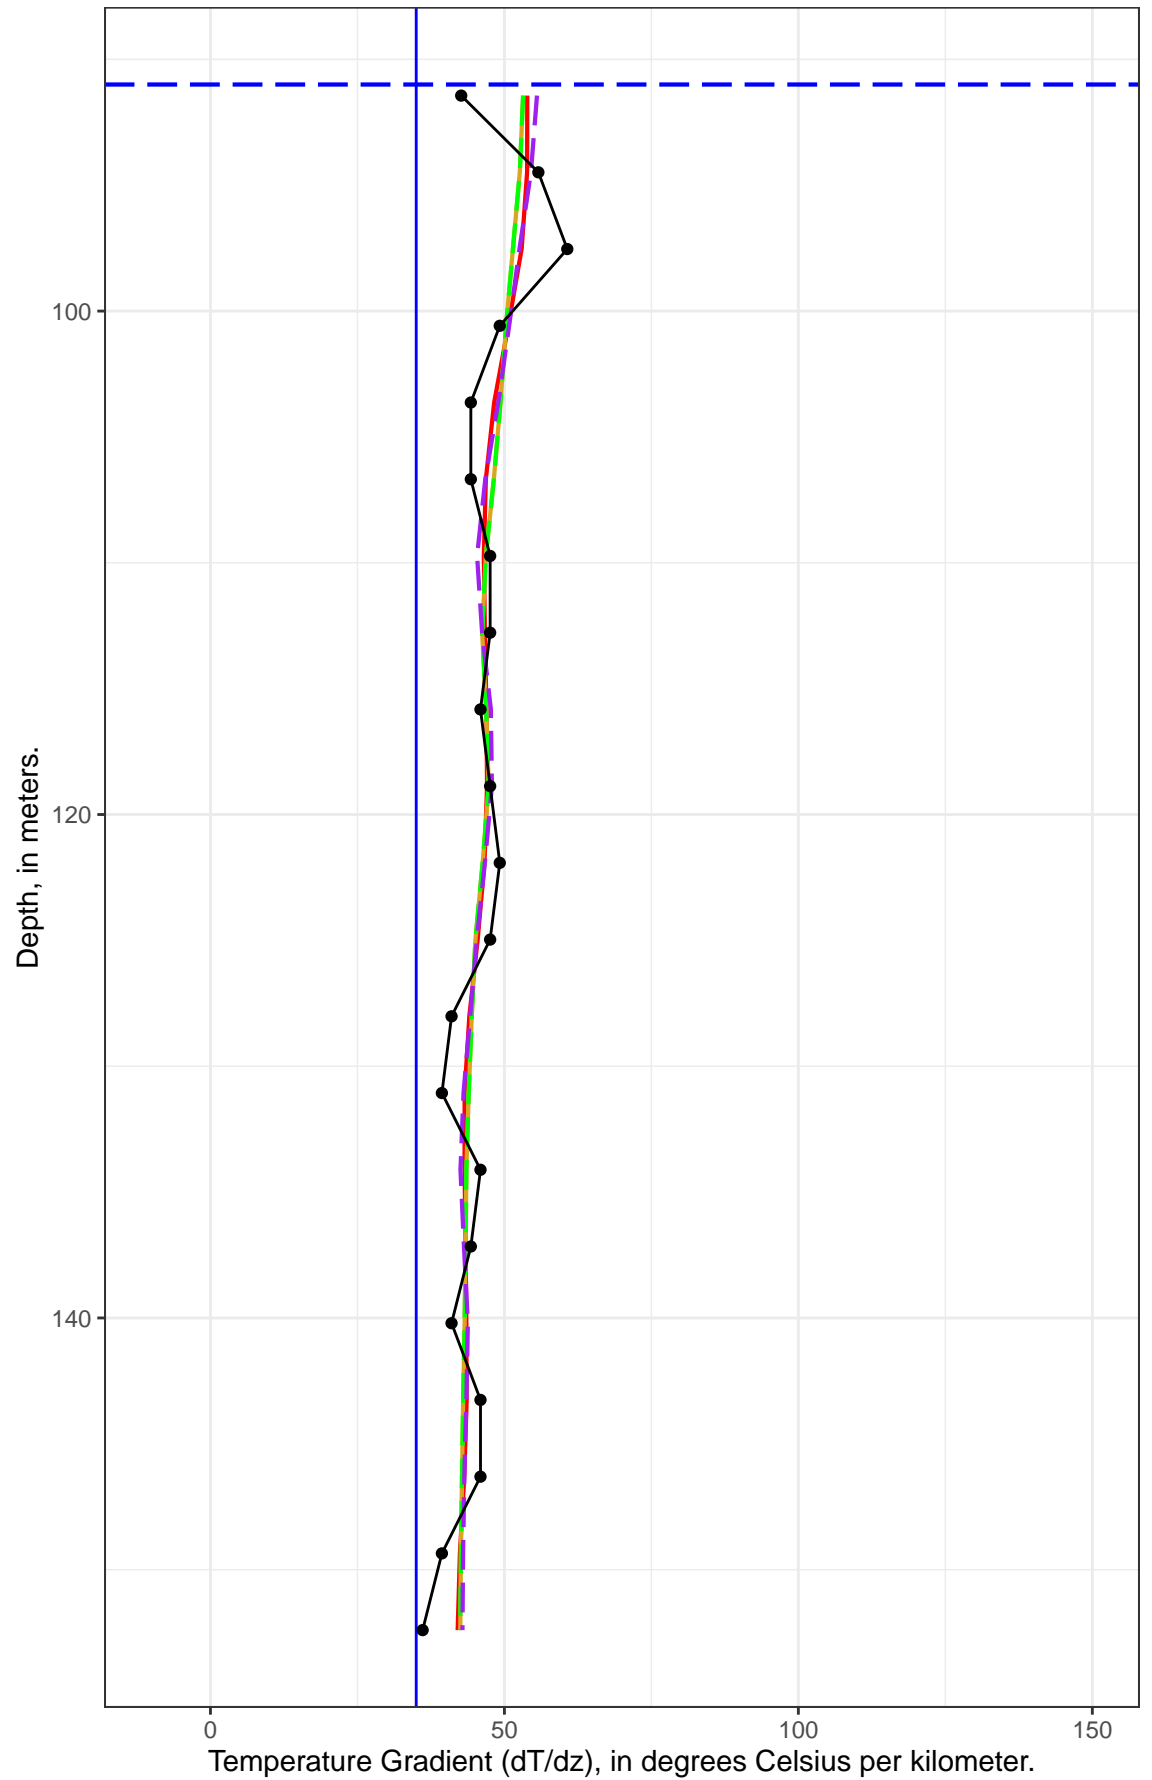

• Data — LOESS (AICC) — LOESS (constant) — LOESS (GCV) — Spline

ID: 132 [H-22-76-53\_KILBOURNE\_HOLE] Second Derivative

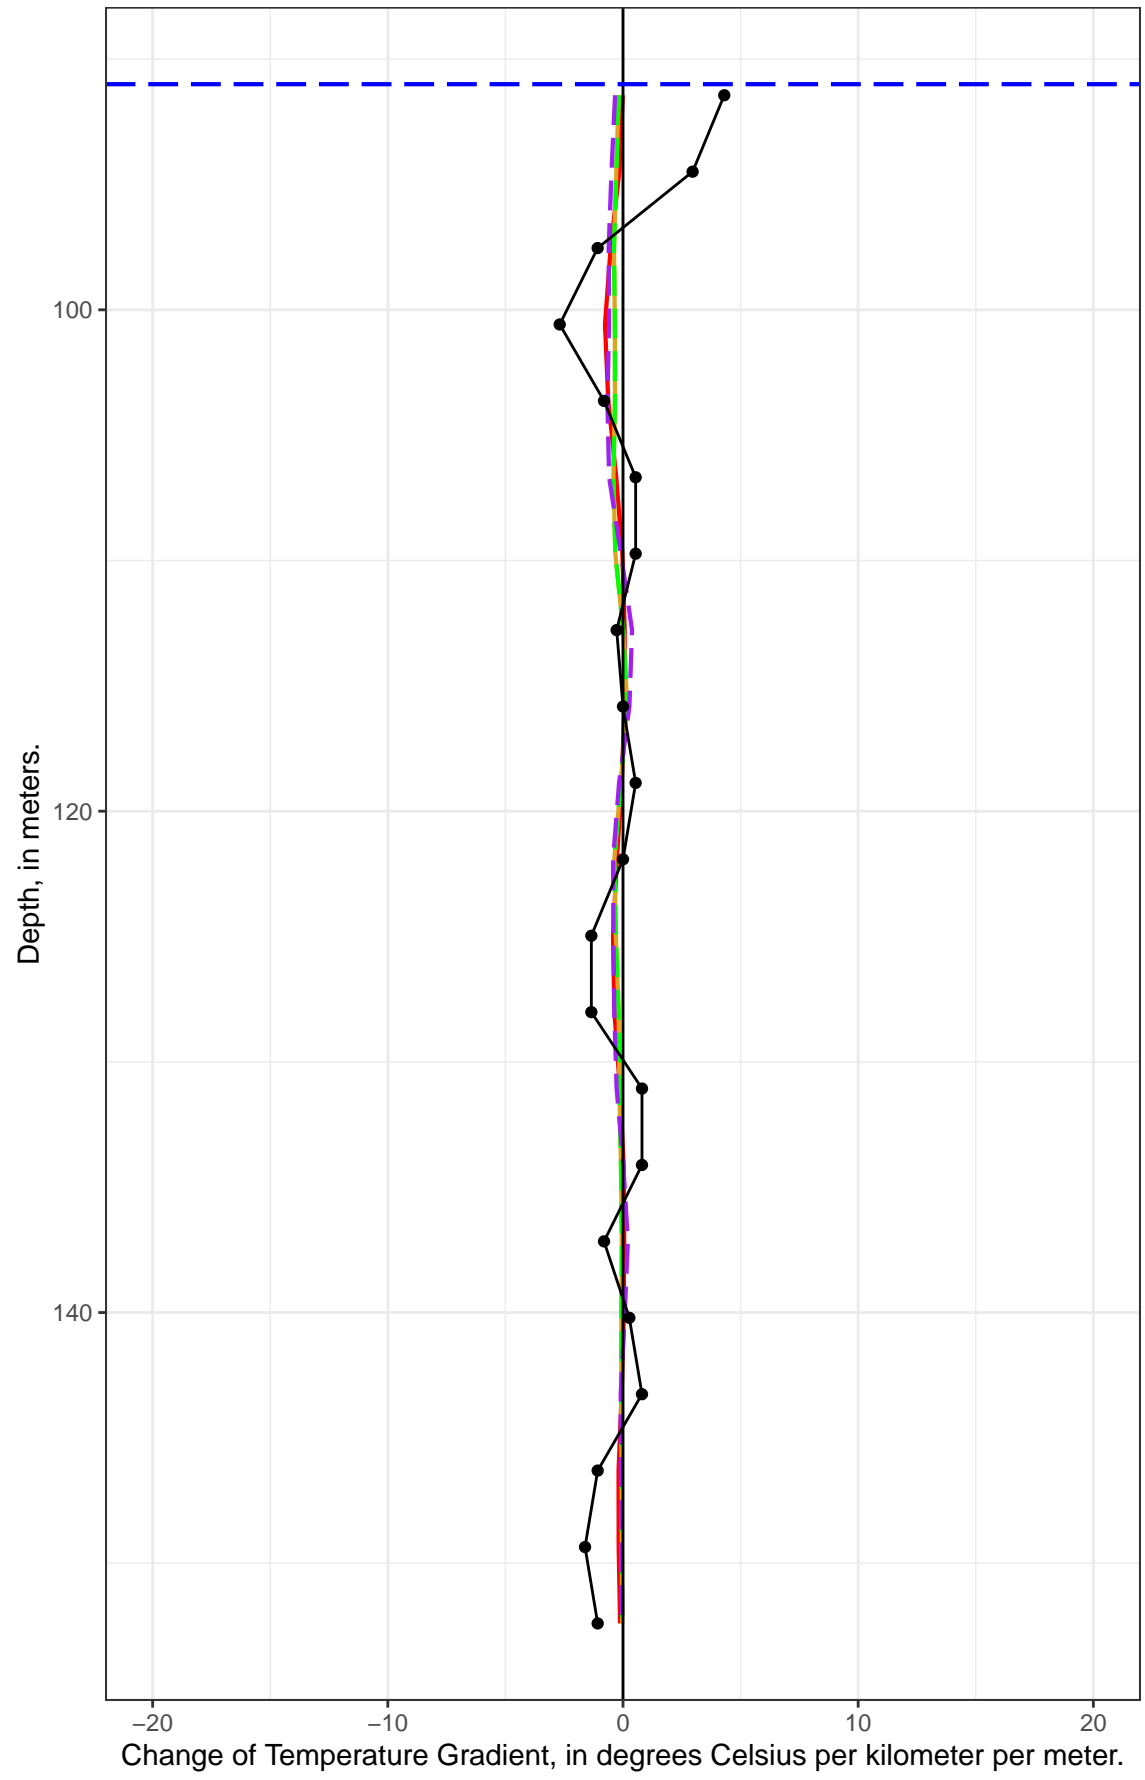

• Data — LOESS (AICC) — LOESS (constant) — LOESS (GCV) — Spline

ID: 133 [H-22-76-54\_KILBOURNE\_HOLE] Smoothed Profile

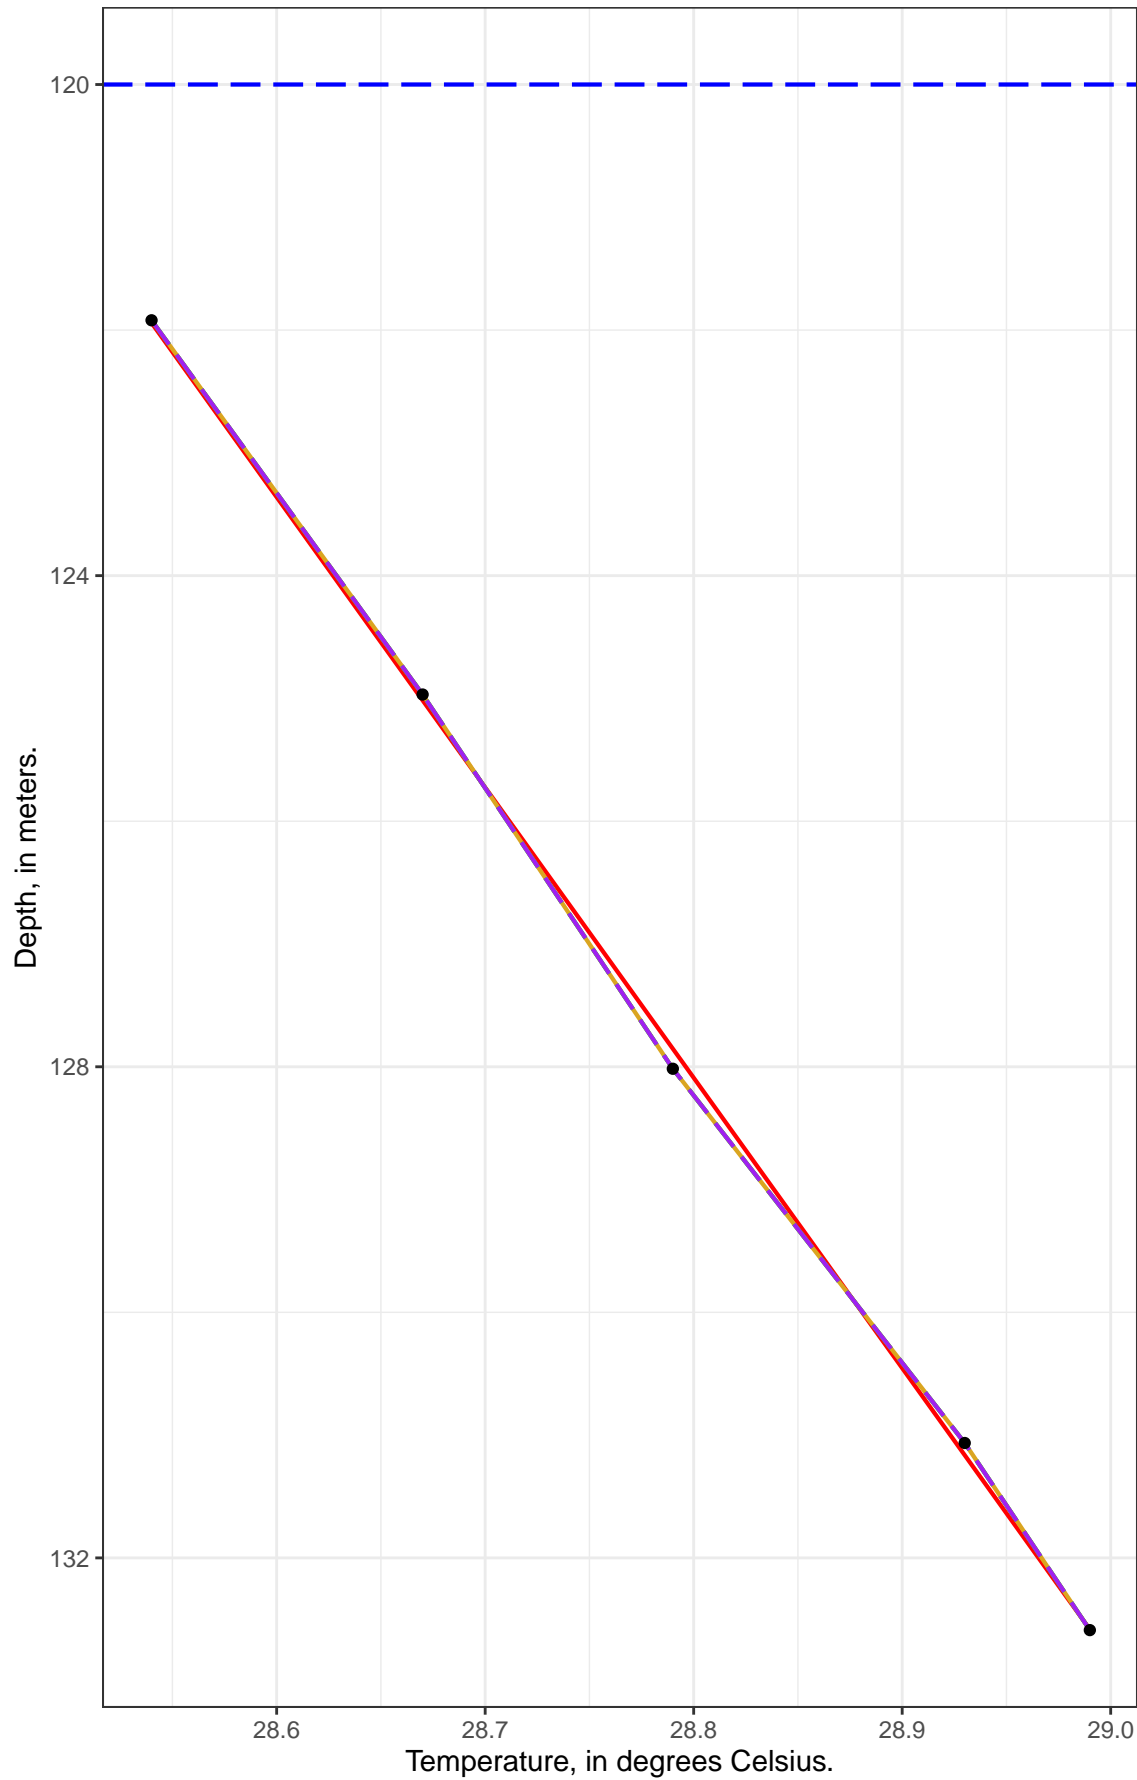

ID: 133 [H-22-76-54\_KILBOURNE\_HOLE] First Derivative

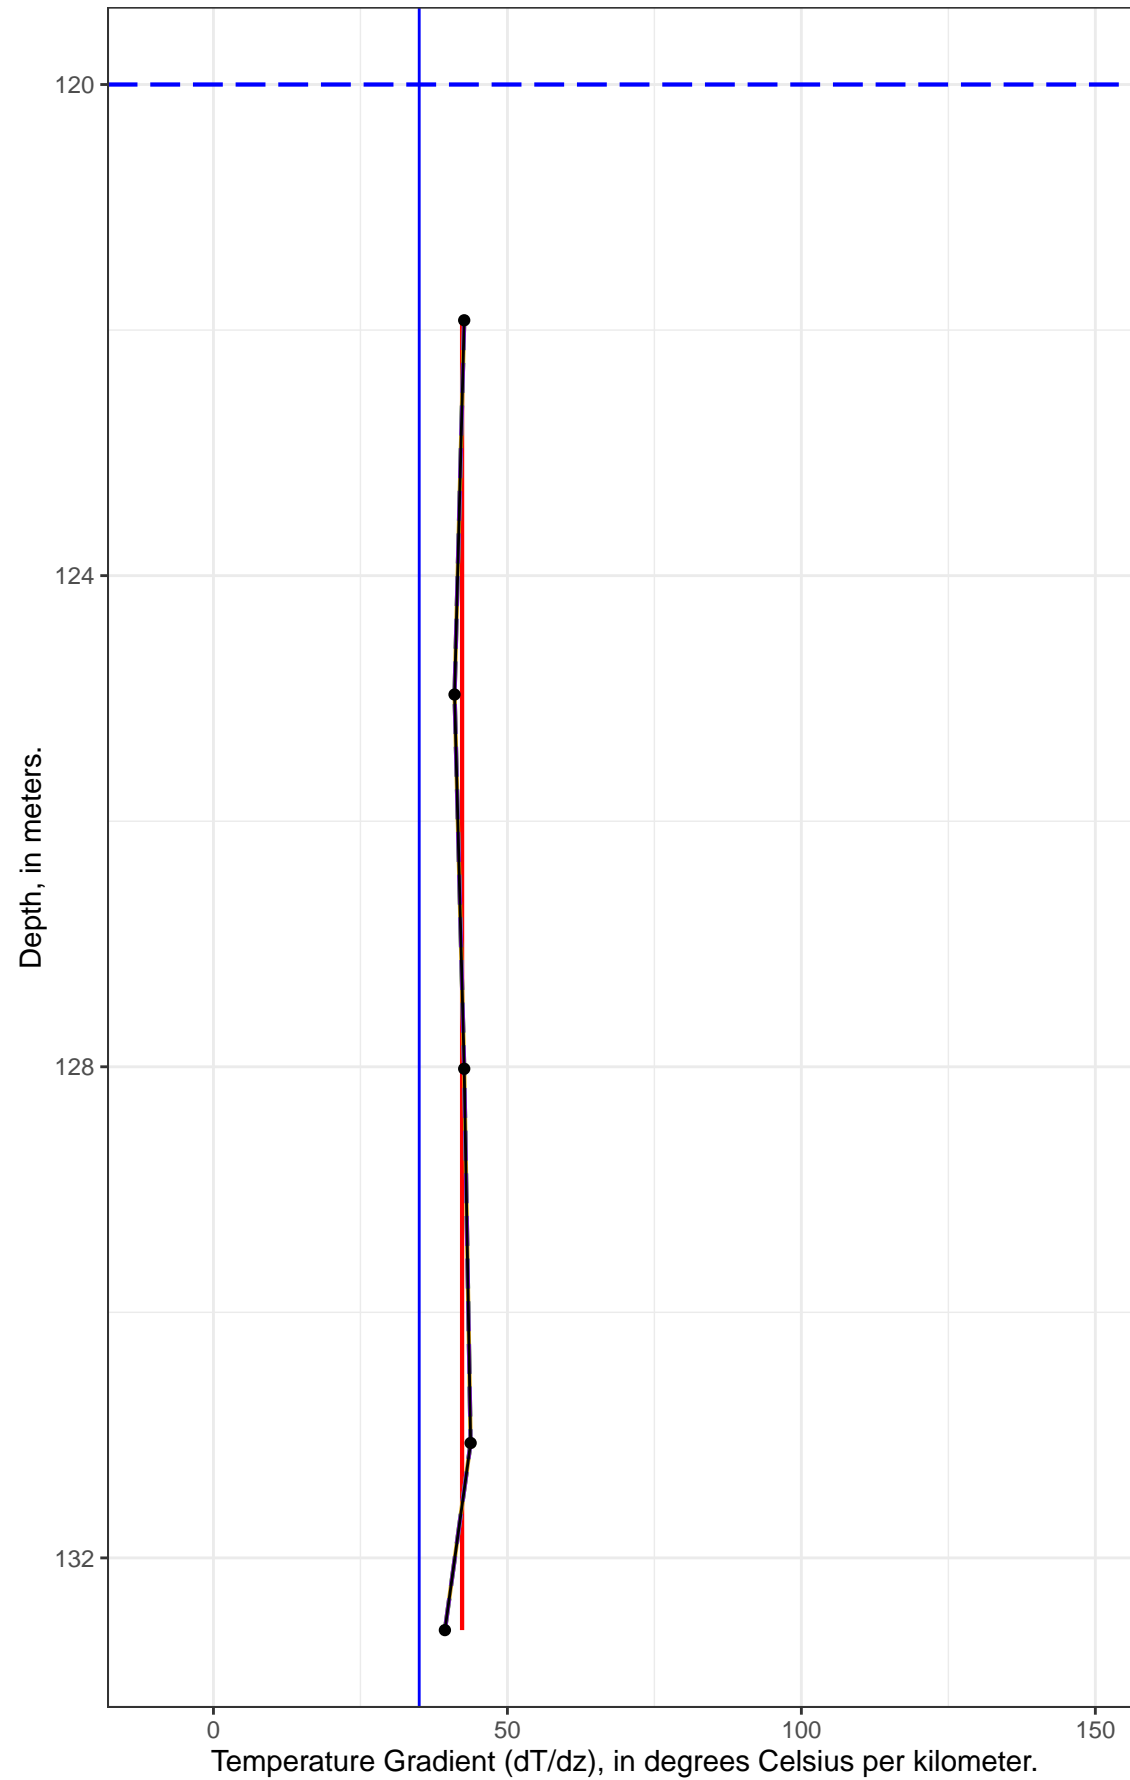

ID: 133 [H-22-76-54\_KILBOURNE\_HOLE] Second Derivative

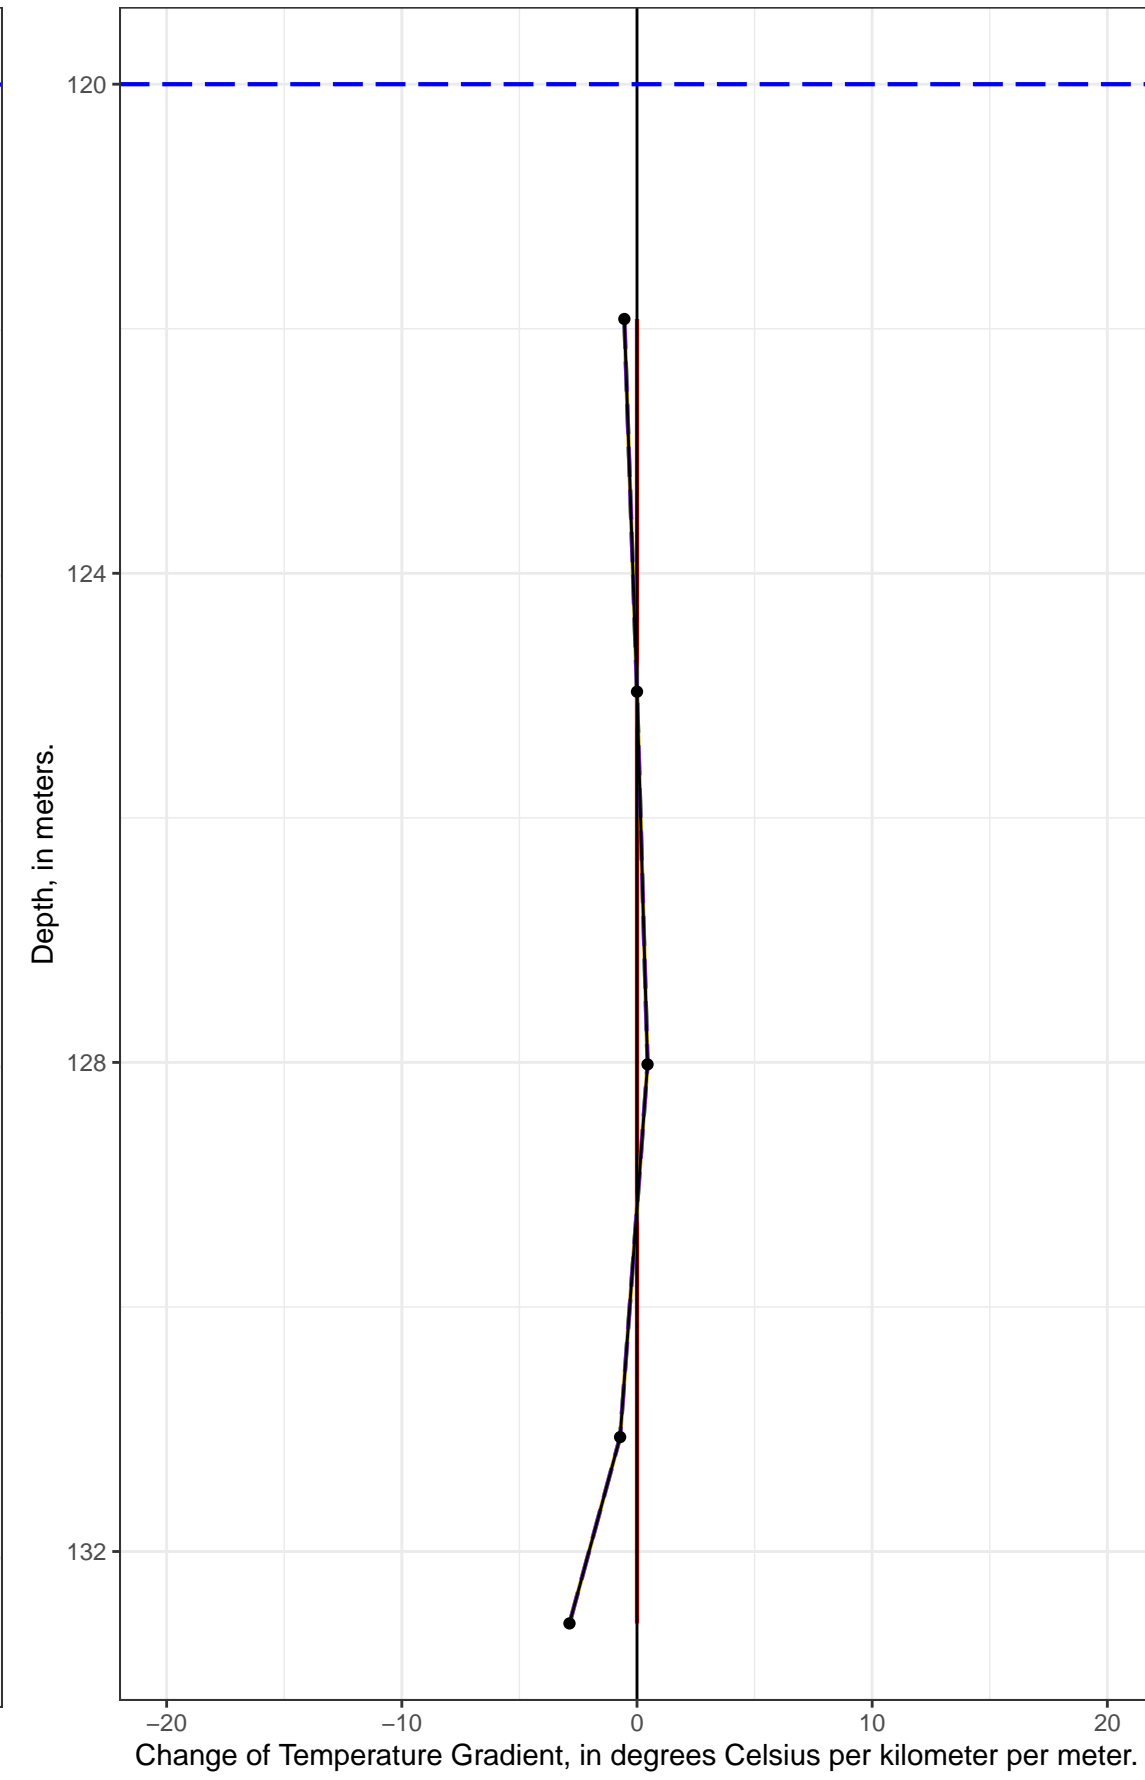

• Data — LOESS (AICC) — LOESS (constant) — LOESS (GCV) — Spline

• Data — LOESS (AICC) — LOESS (constant) — LOESS (GCV) — Spline

• Data — LOESS (AICC) — LOESS (constant) — LOESS (GCV) — Spline

ID: 136 [H-22-76-8\_KILBOURNE\_HOLE] Smoothed Profile

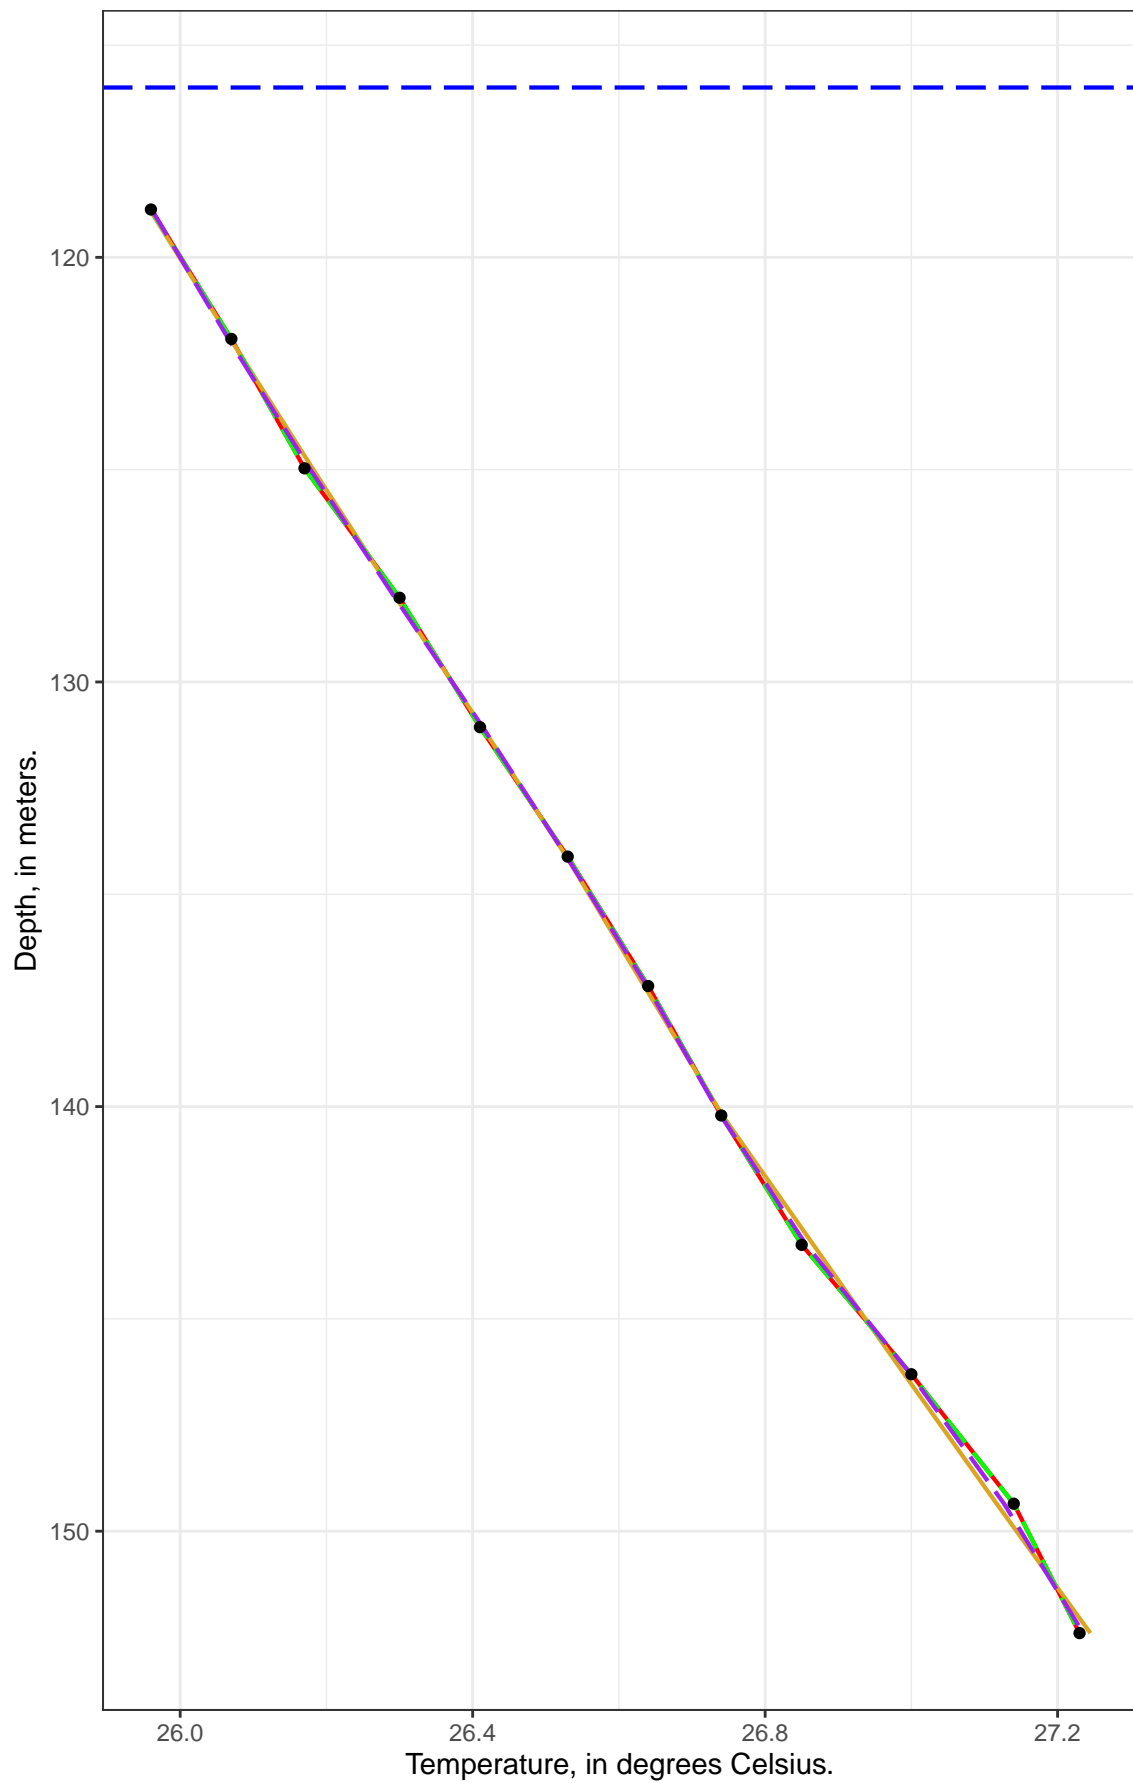

ID: 136 [H-22-76-8\_KILBOURNE\_HOLE] First Derivative

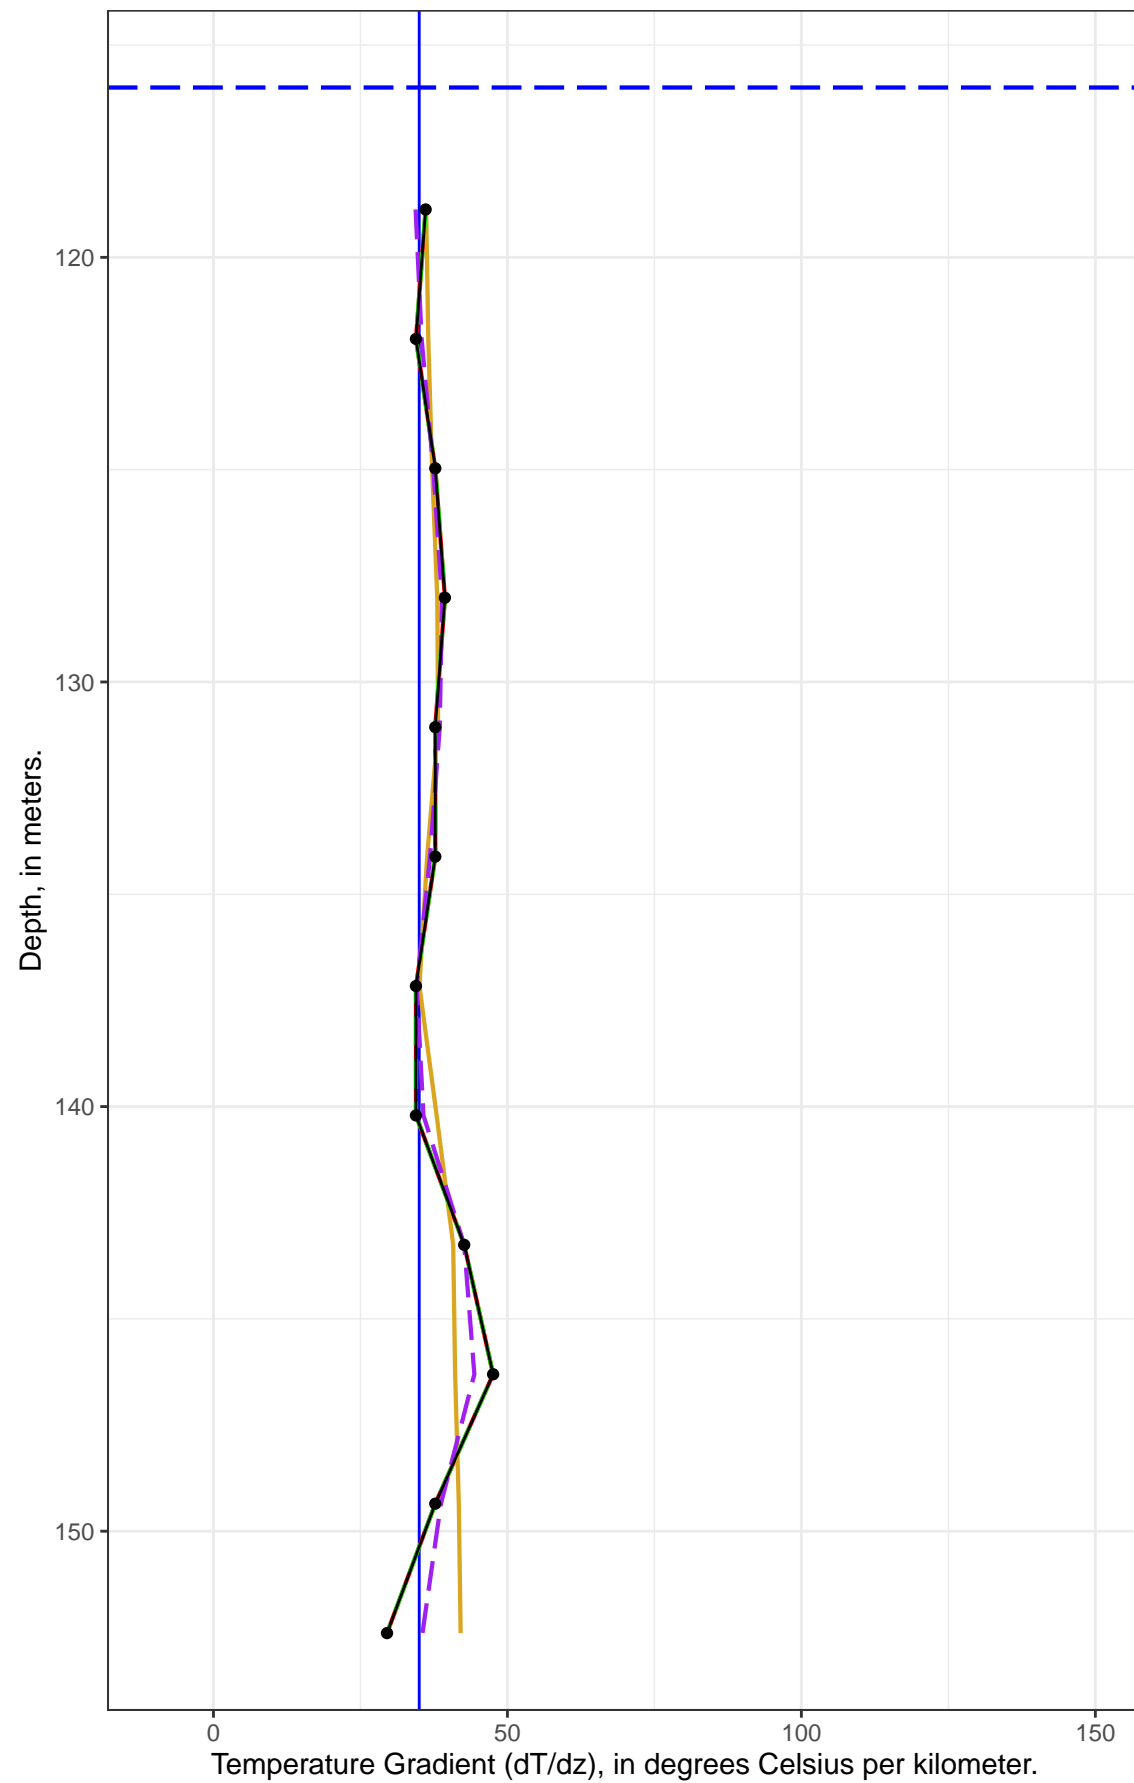

ID: 136 [H-22-76-8\_KILBOURNE\_HOLE] Second Derivative

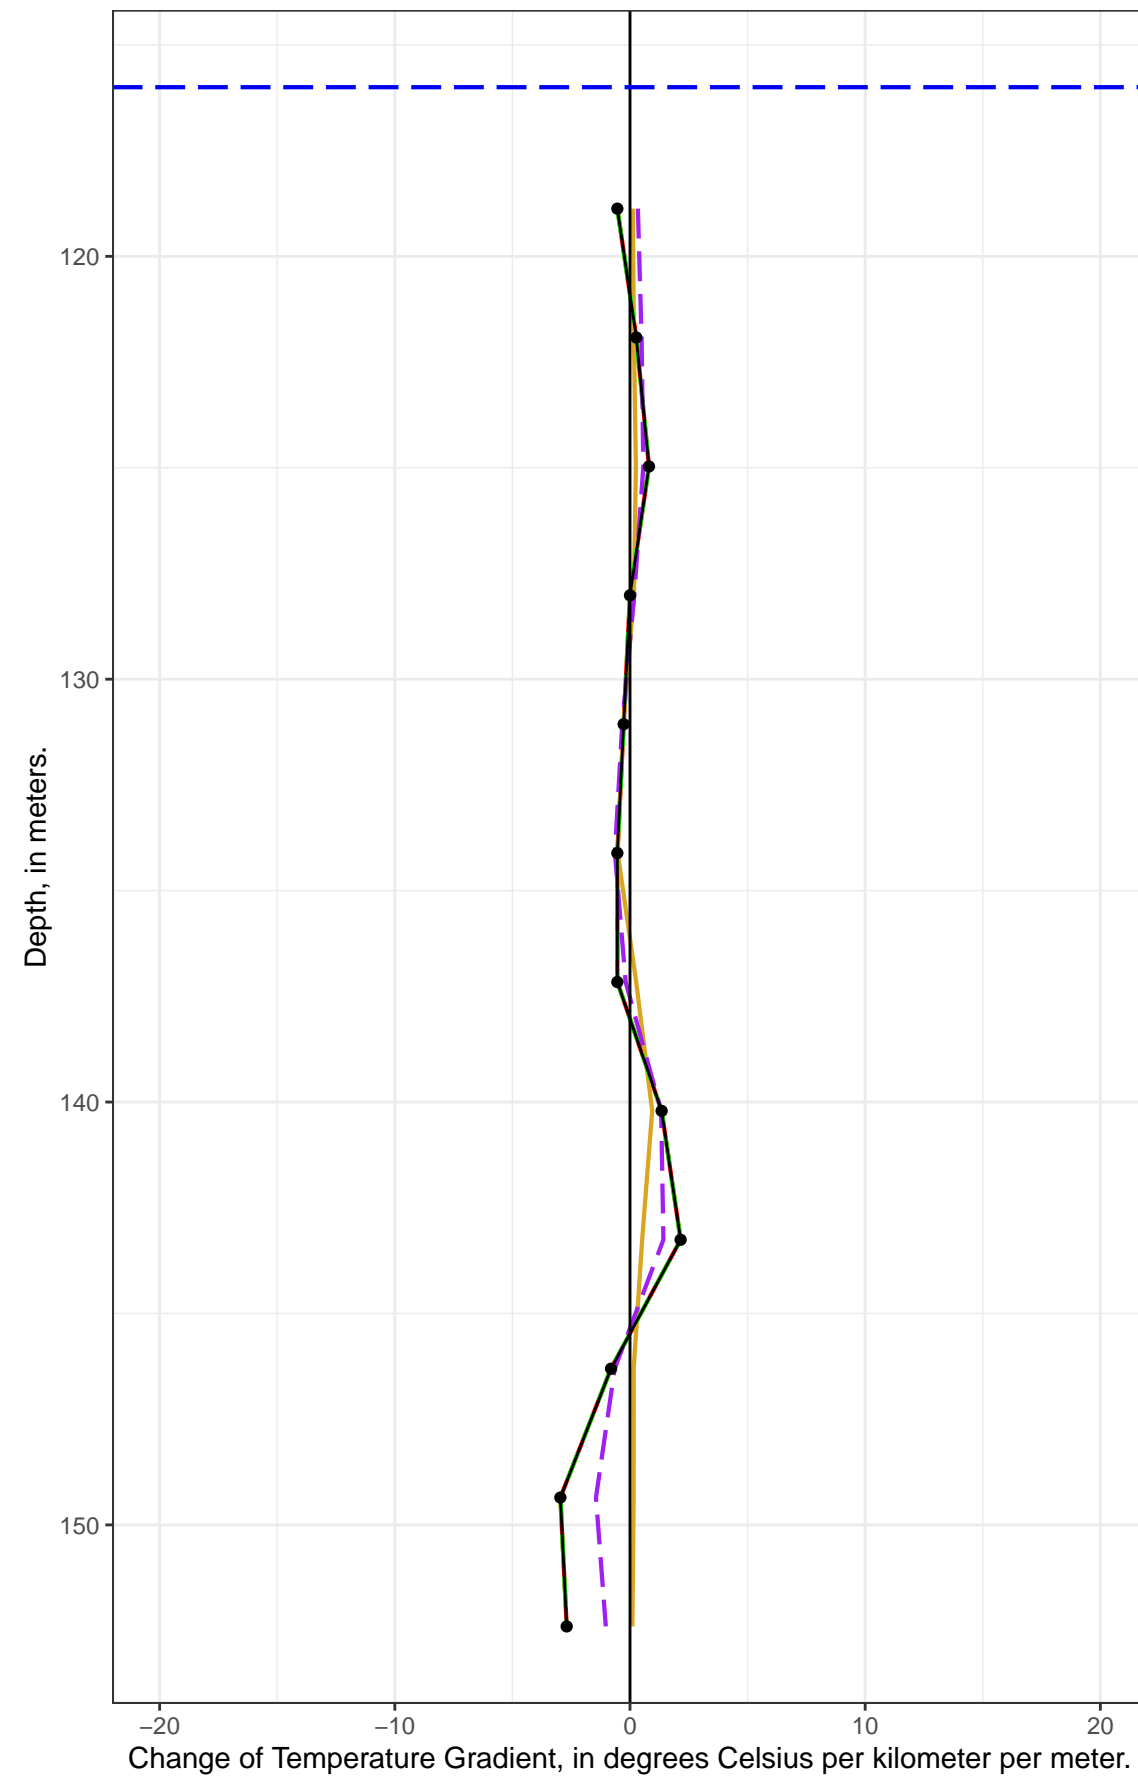

• Data • LOESS (AICC) • LOESS (constant) • LOESS (GCV) • Spline

• Data • LOESS (AICC) • LOESS (constant) • LOESS (GCV) • Spline

• Data • LOESS (AICC) • LOESS (constant) • LOESS (GCV) • Spline

ID: 137 [H-22-76-9\_KILBOURNE\_HOLE] Smoothed Profile

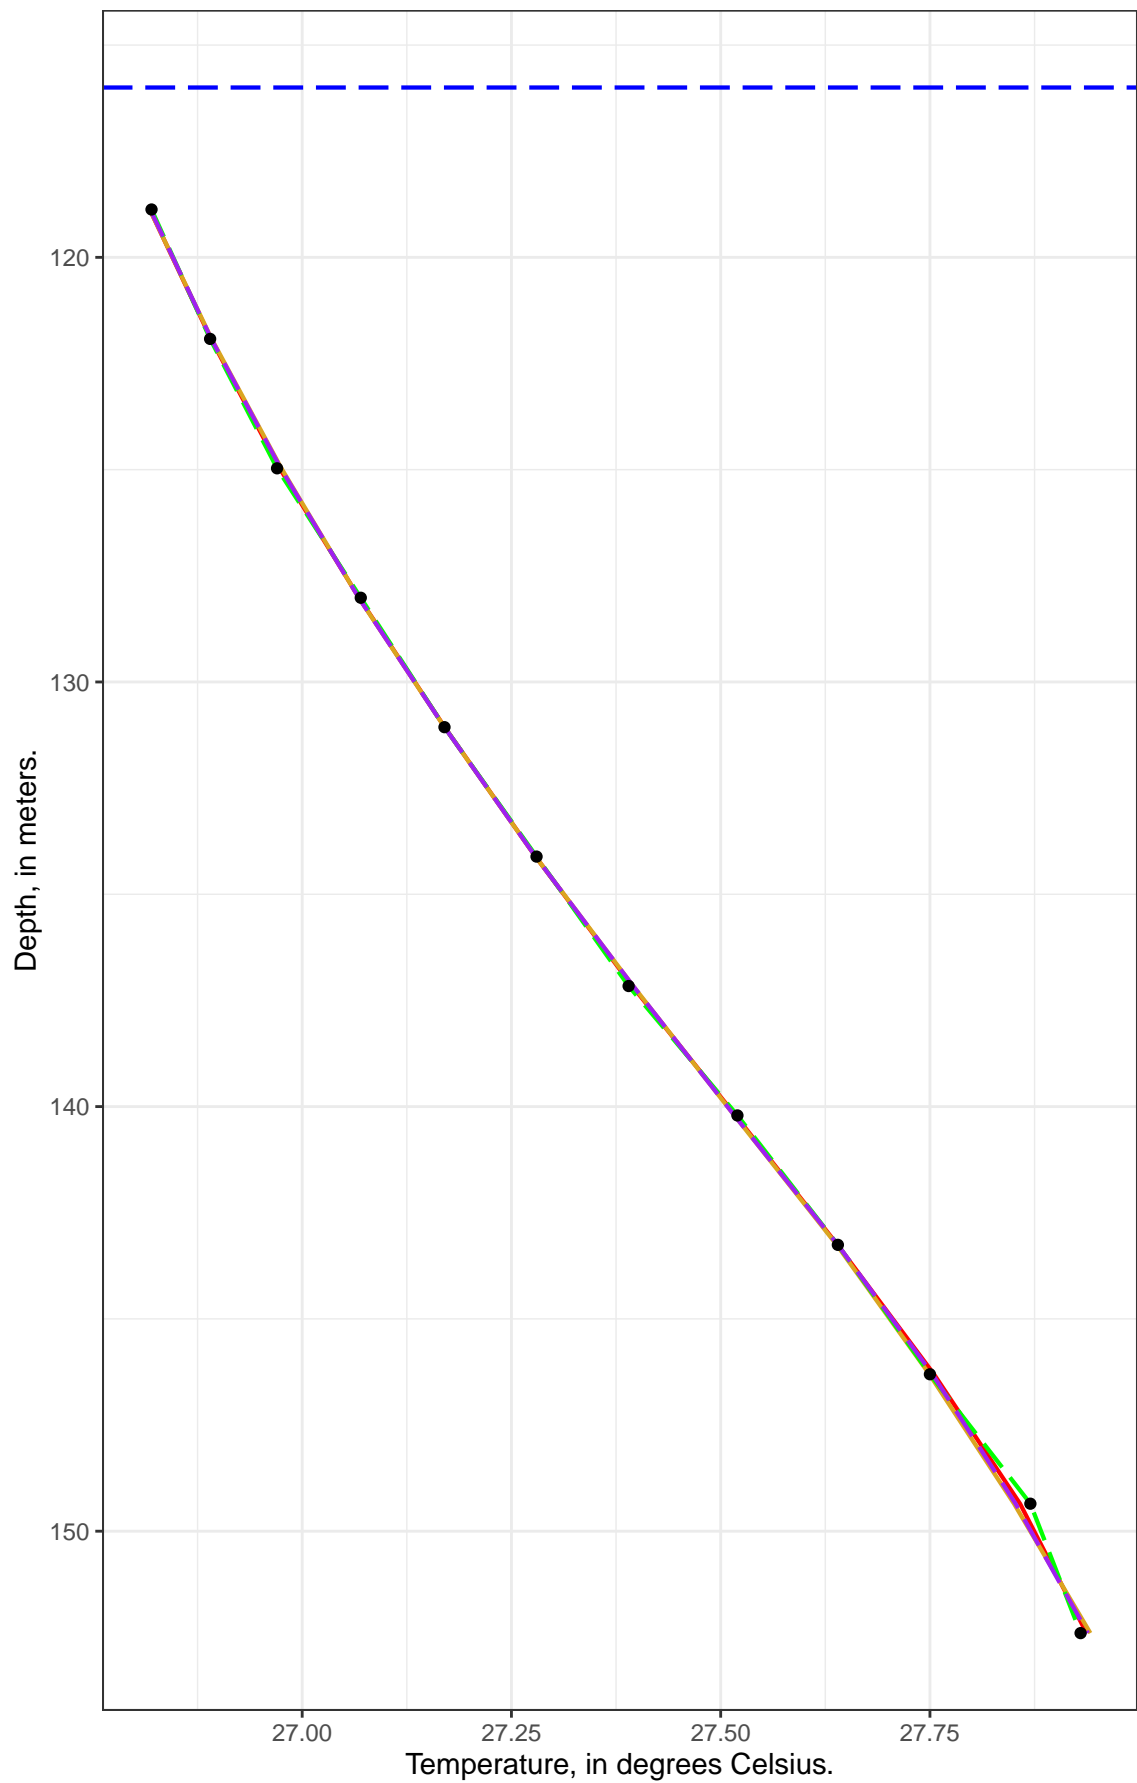

ID: 137 [H-22-76-9\_KILBOURNE\_HOLE] First Derivative

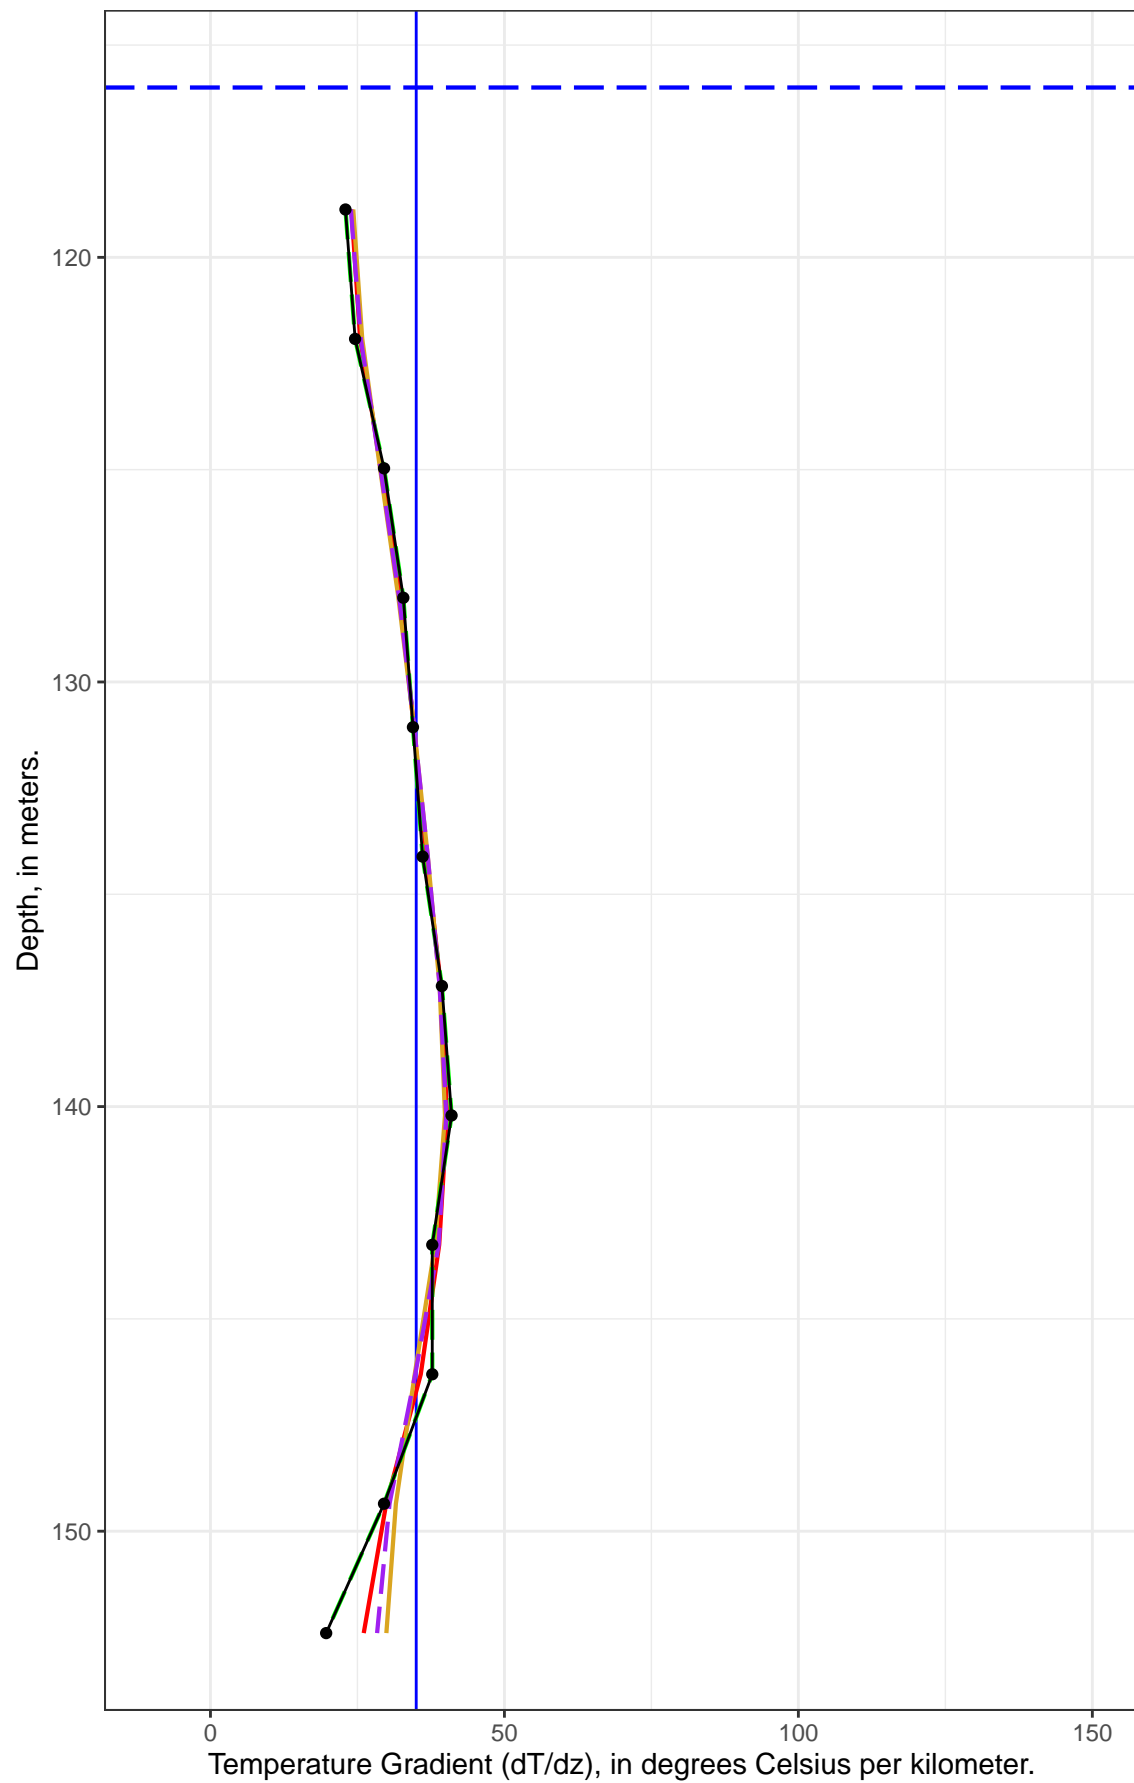

ID: 137 [H-22-76-9\_KILBOURNE\_HOLE] Second Derivative

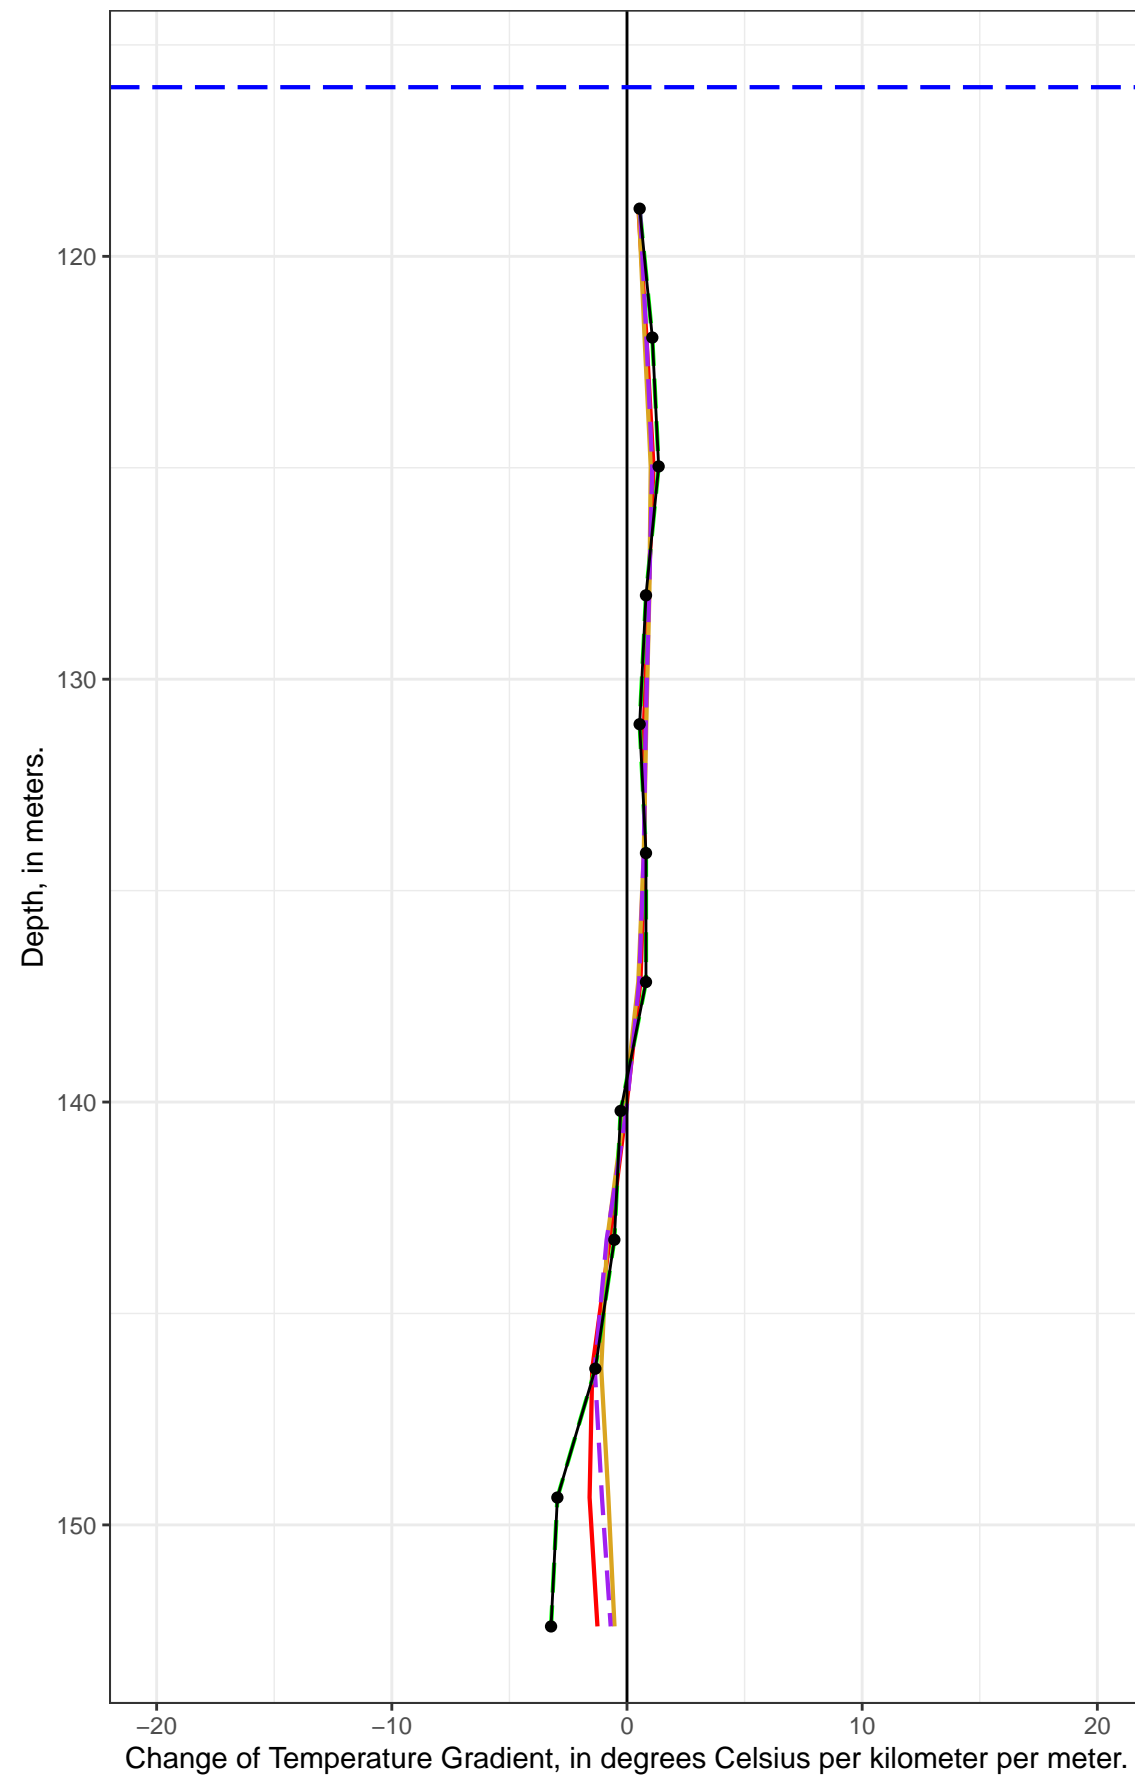

• Data • LOESS (AICC) • LOESS (constant) • LOESS (GCV) • Spline

• Data • LOESS (AICC) • LOESS (constant) • LOESS (GCV) • Spline

• Data • LOESS (AICC) • LOESS (constant) • LOESS (GCV) • Spline

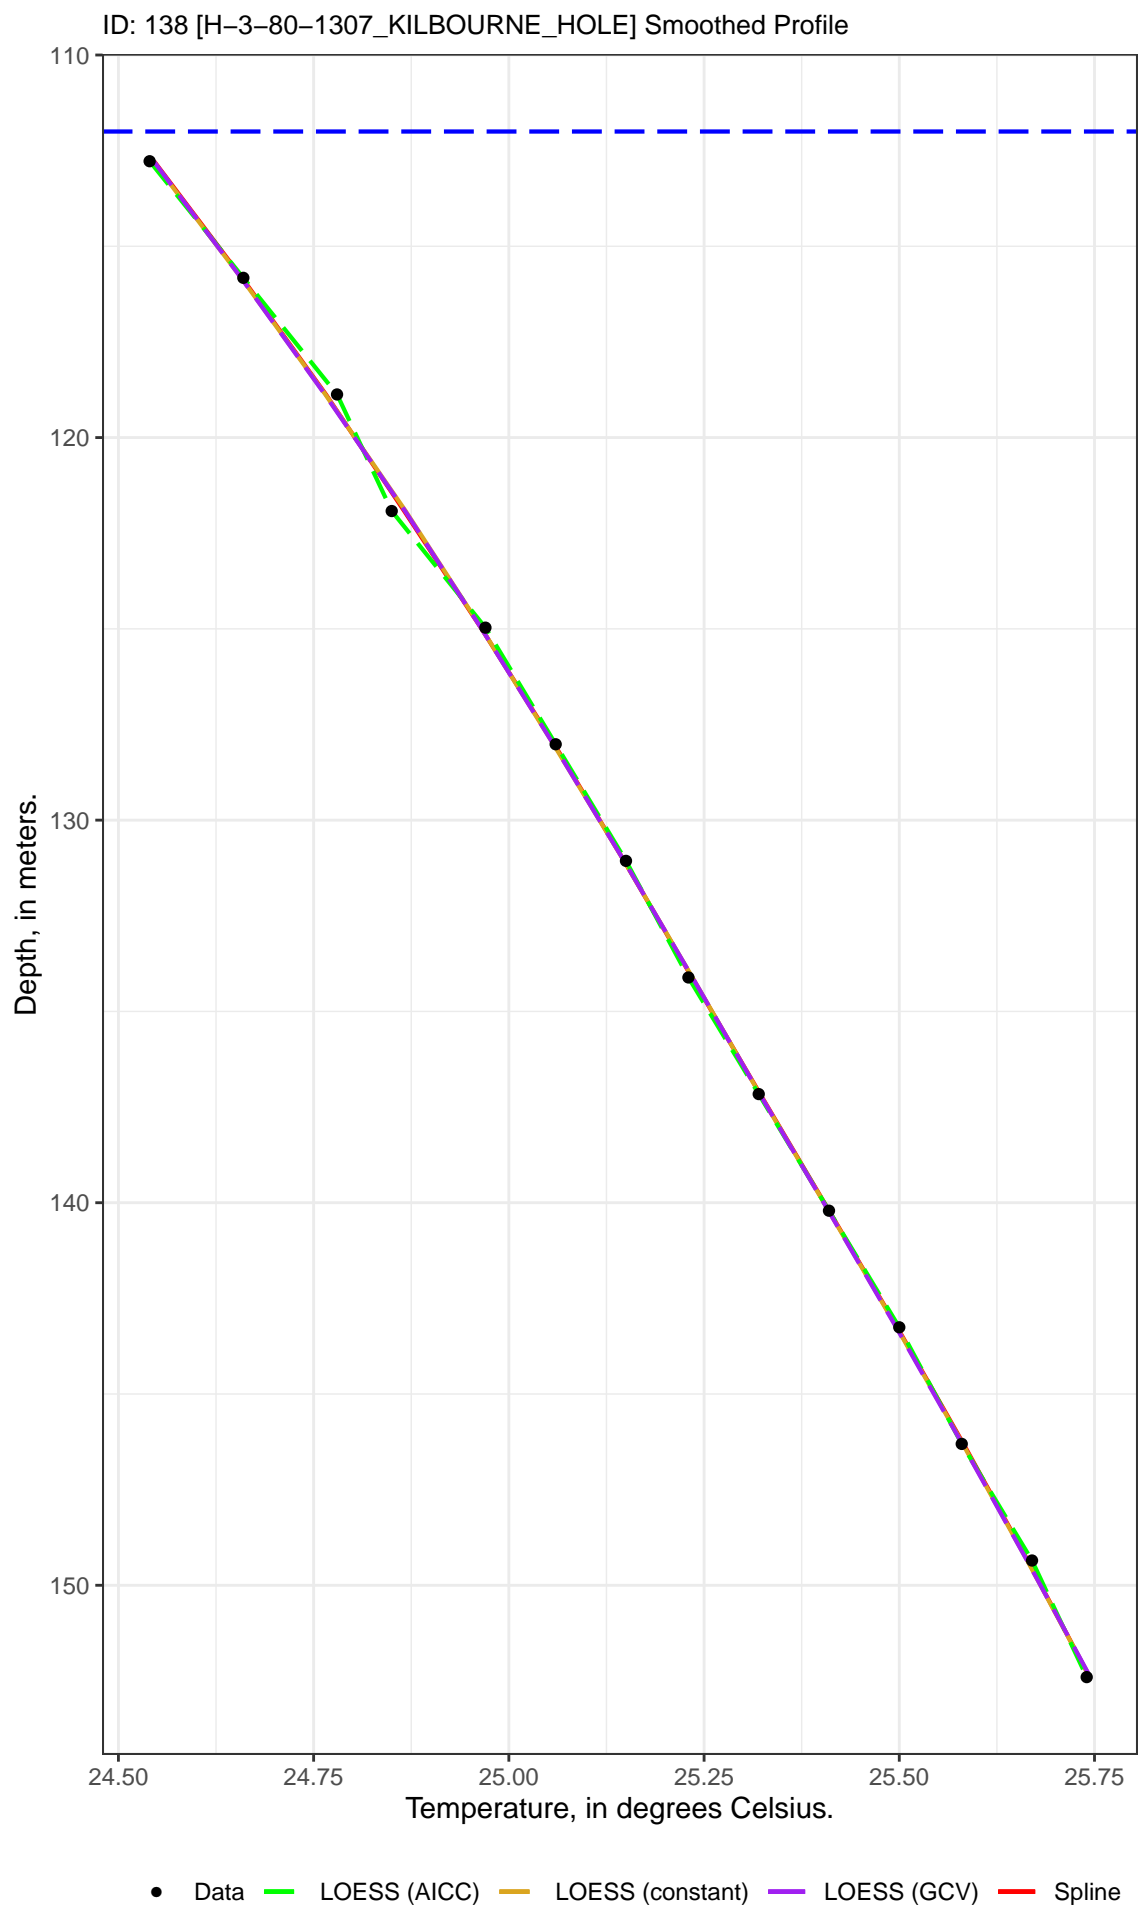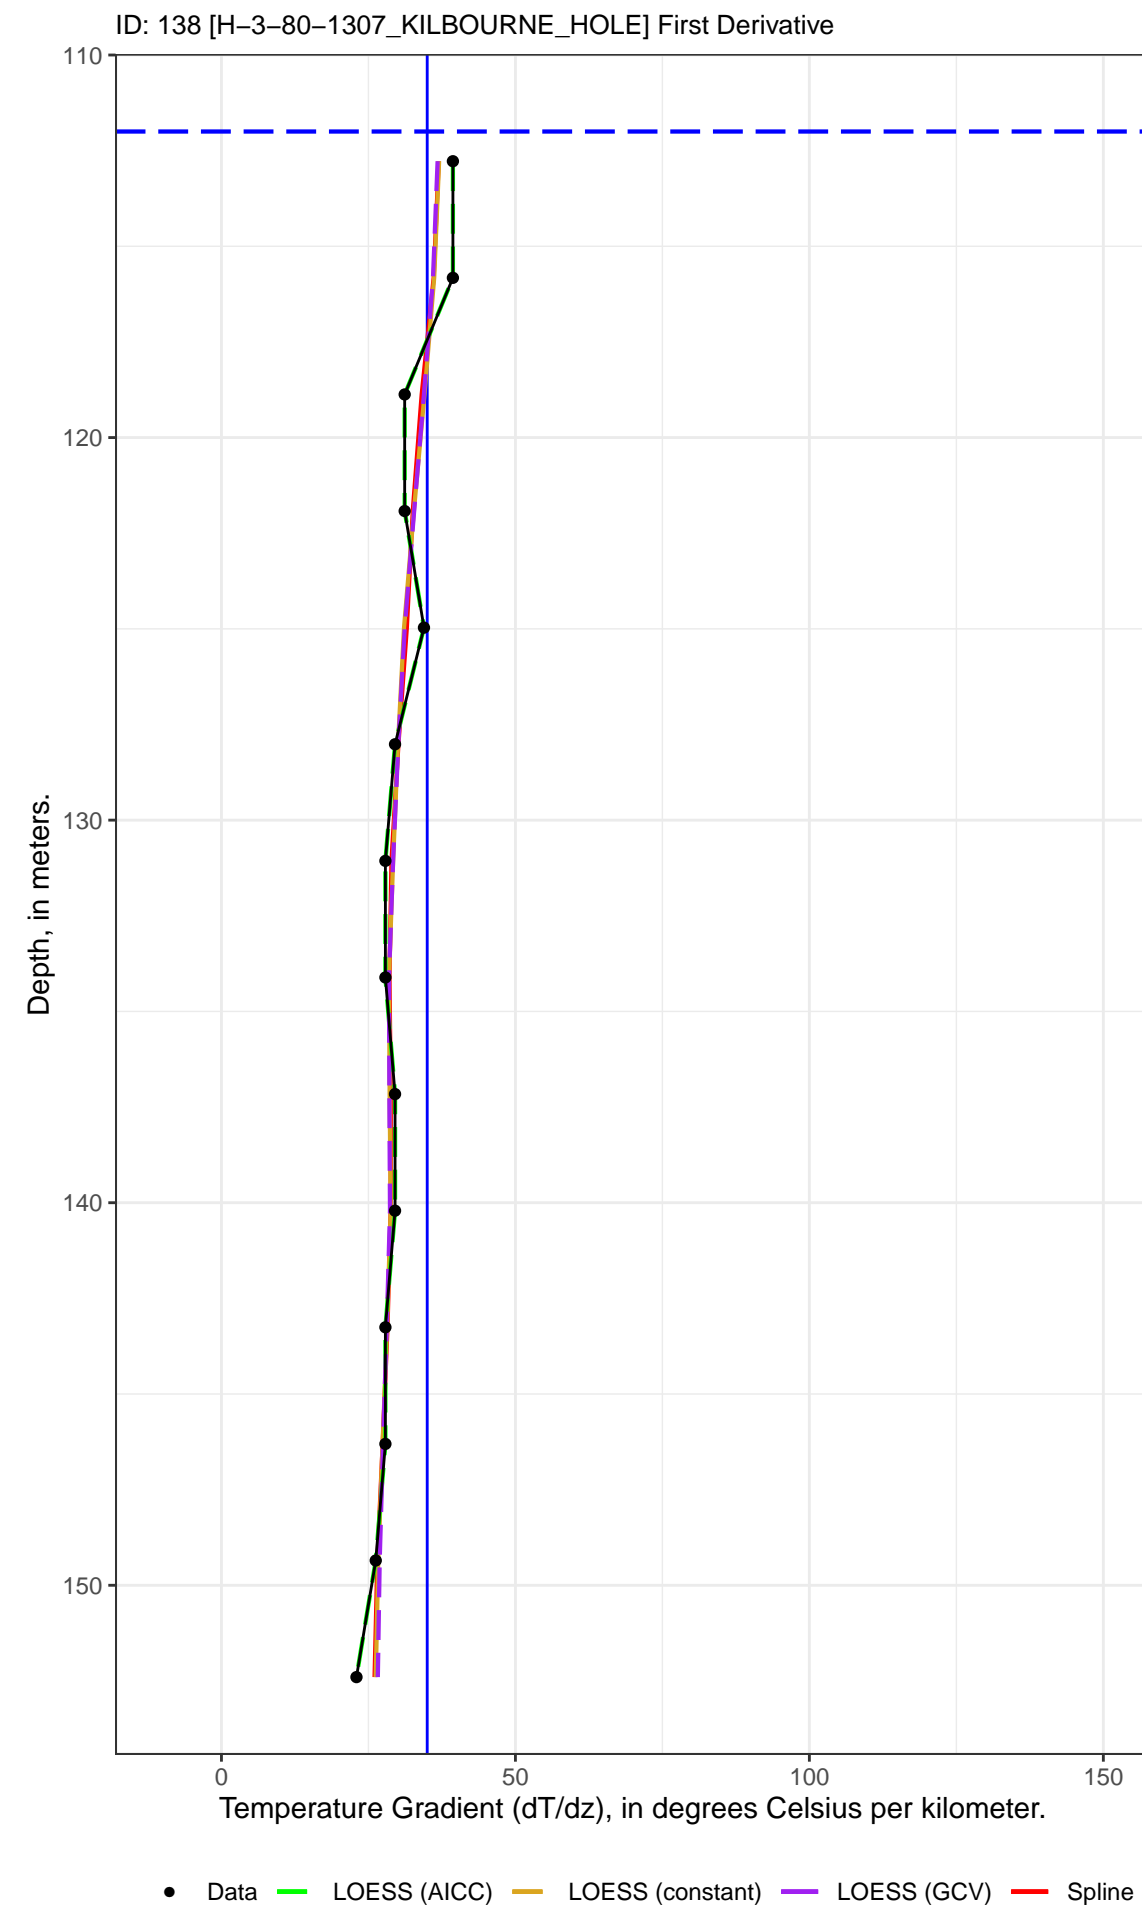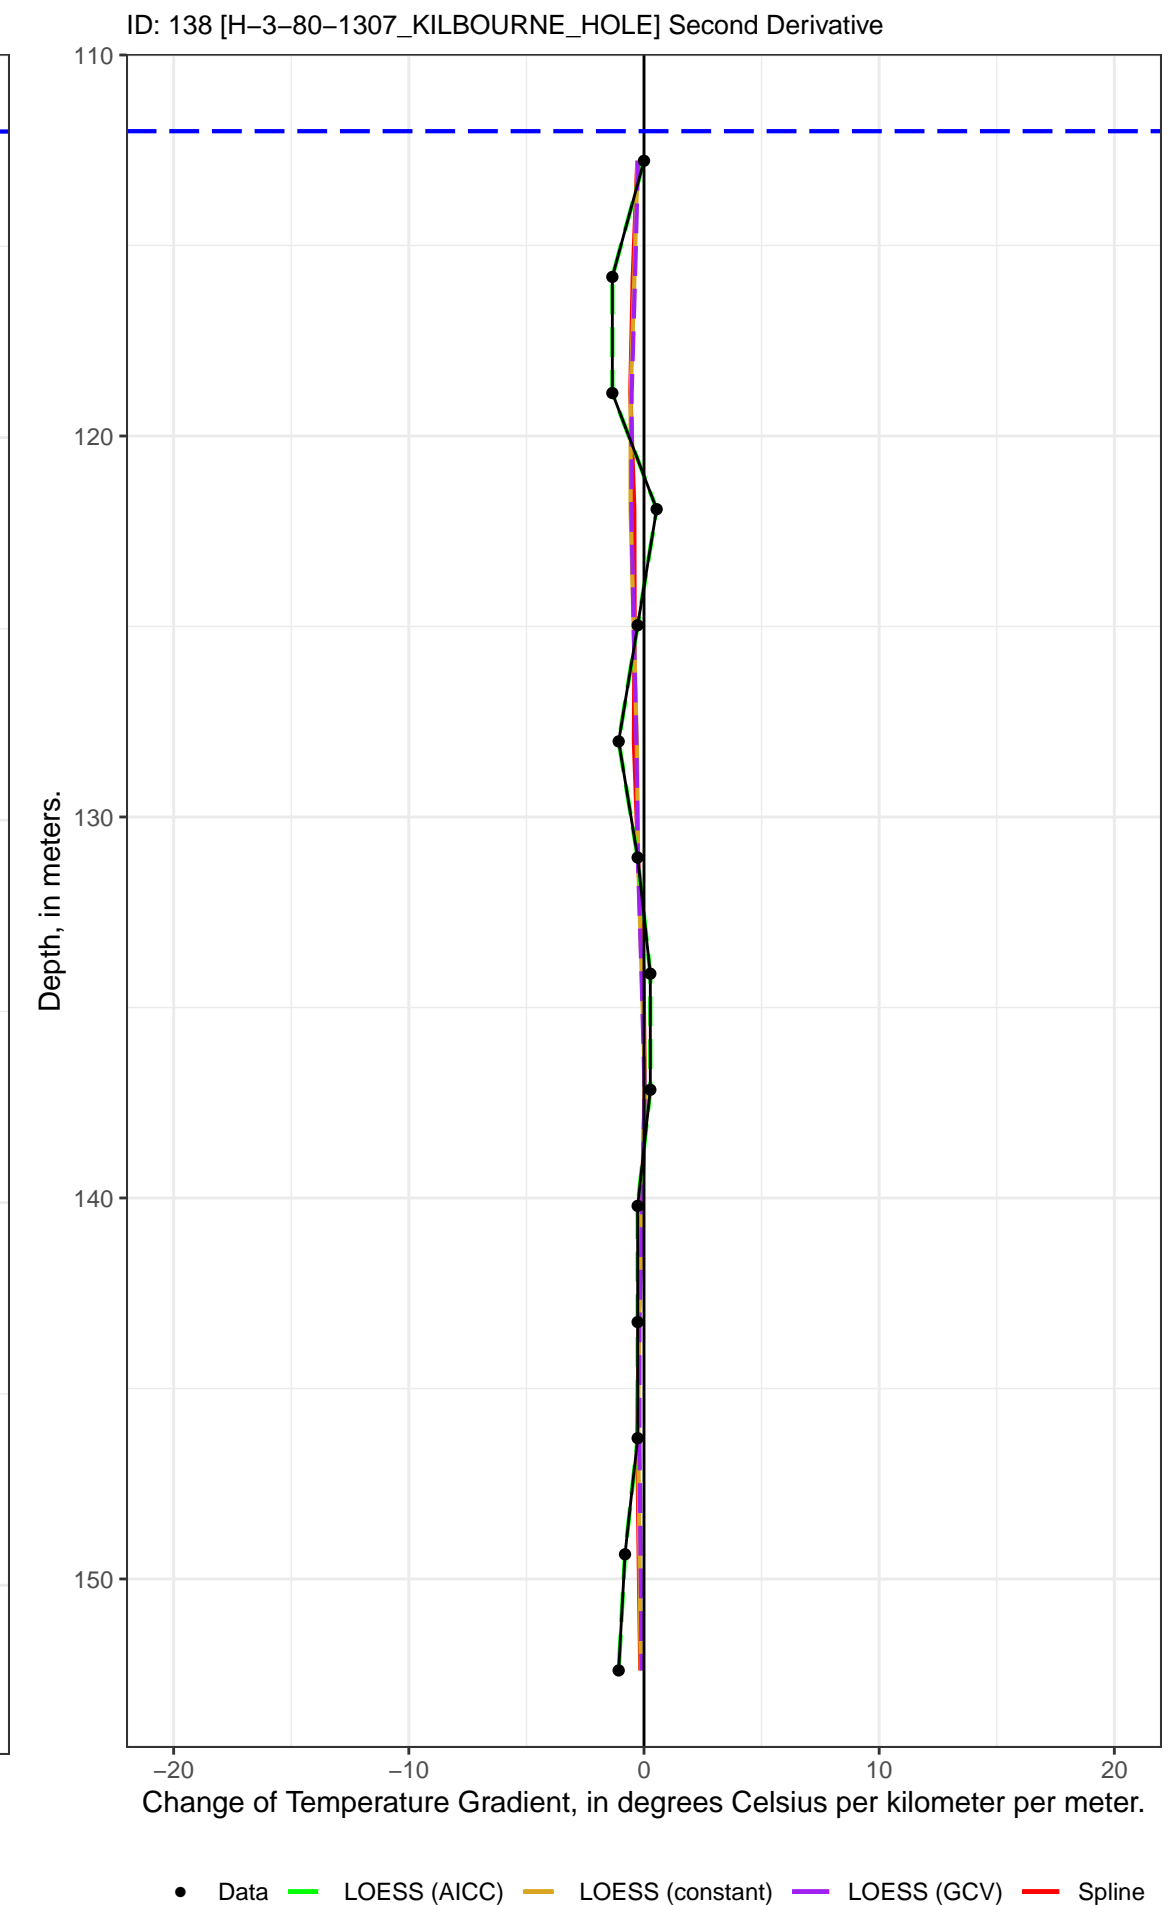



ID: 139 [H-3-80-1308\_KILBOURNE\_HOLE] Smoothed Profile

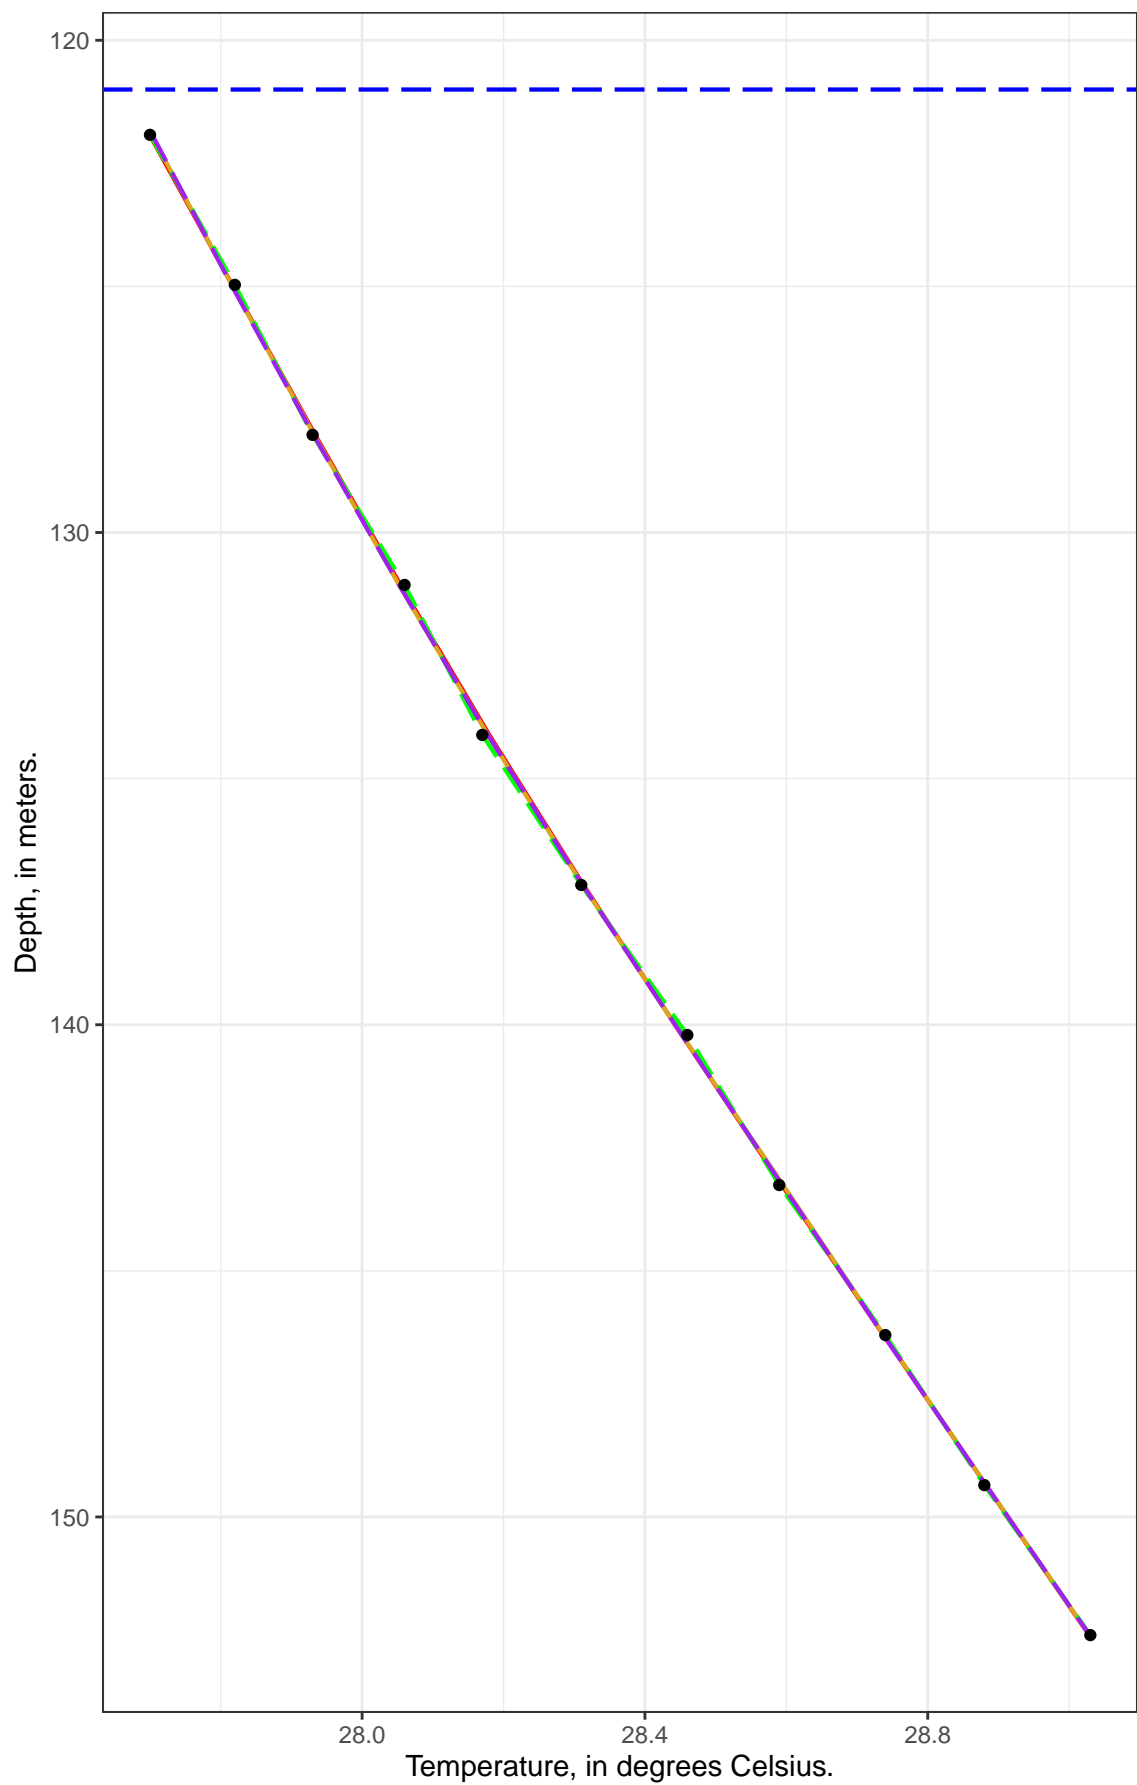

ID: 139 [H-3-80-1308\_KILBOURNE\_HOLE] First Derivative

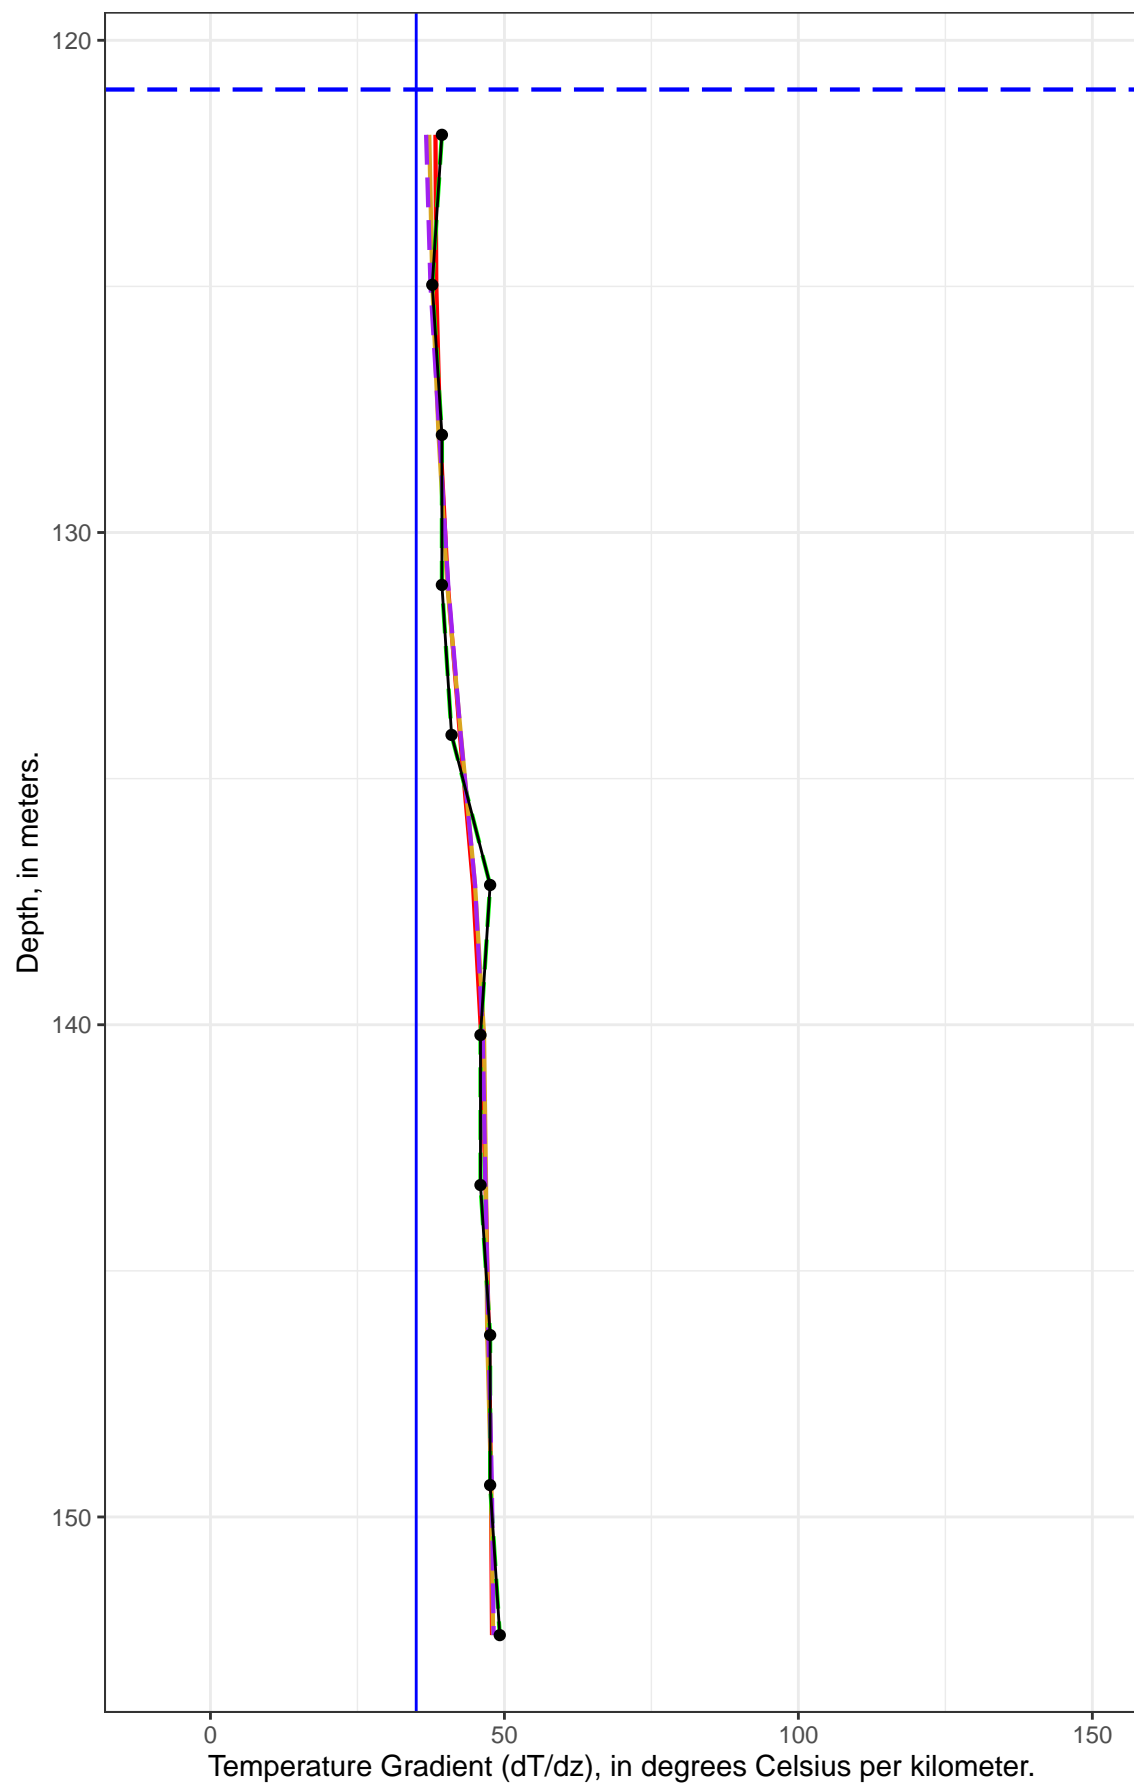

ID: 139 [H-3-80-1308\_KILBOURNE\_HOLE] Second Derivative

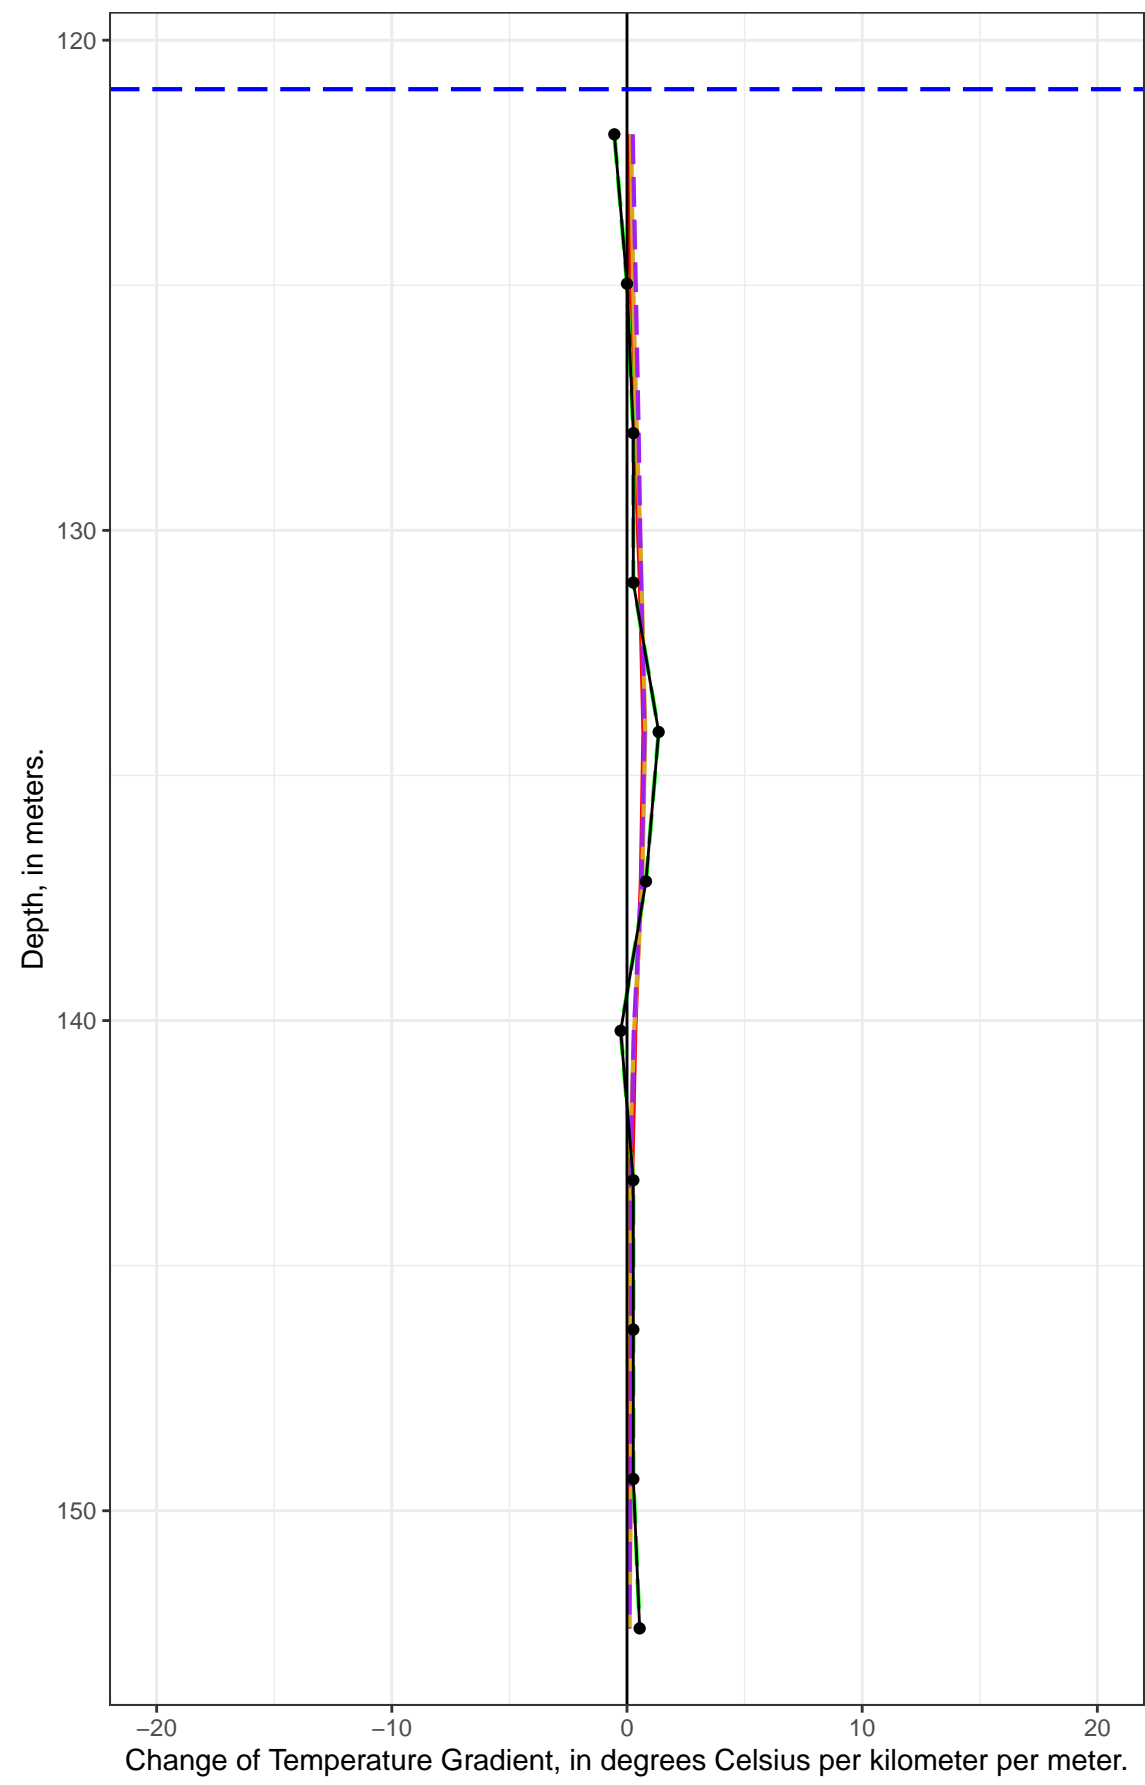

• Data — LOESS (AICC) — LOESS (constant) — LOESS (GCV) — Spline

• Data — LOESS (AICC) — LOESS (constant) — LOESS (GCV) — Spline

• Data — LOESS (AICC) — LOESS (constant) — LOESS (GCV) — Spline

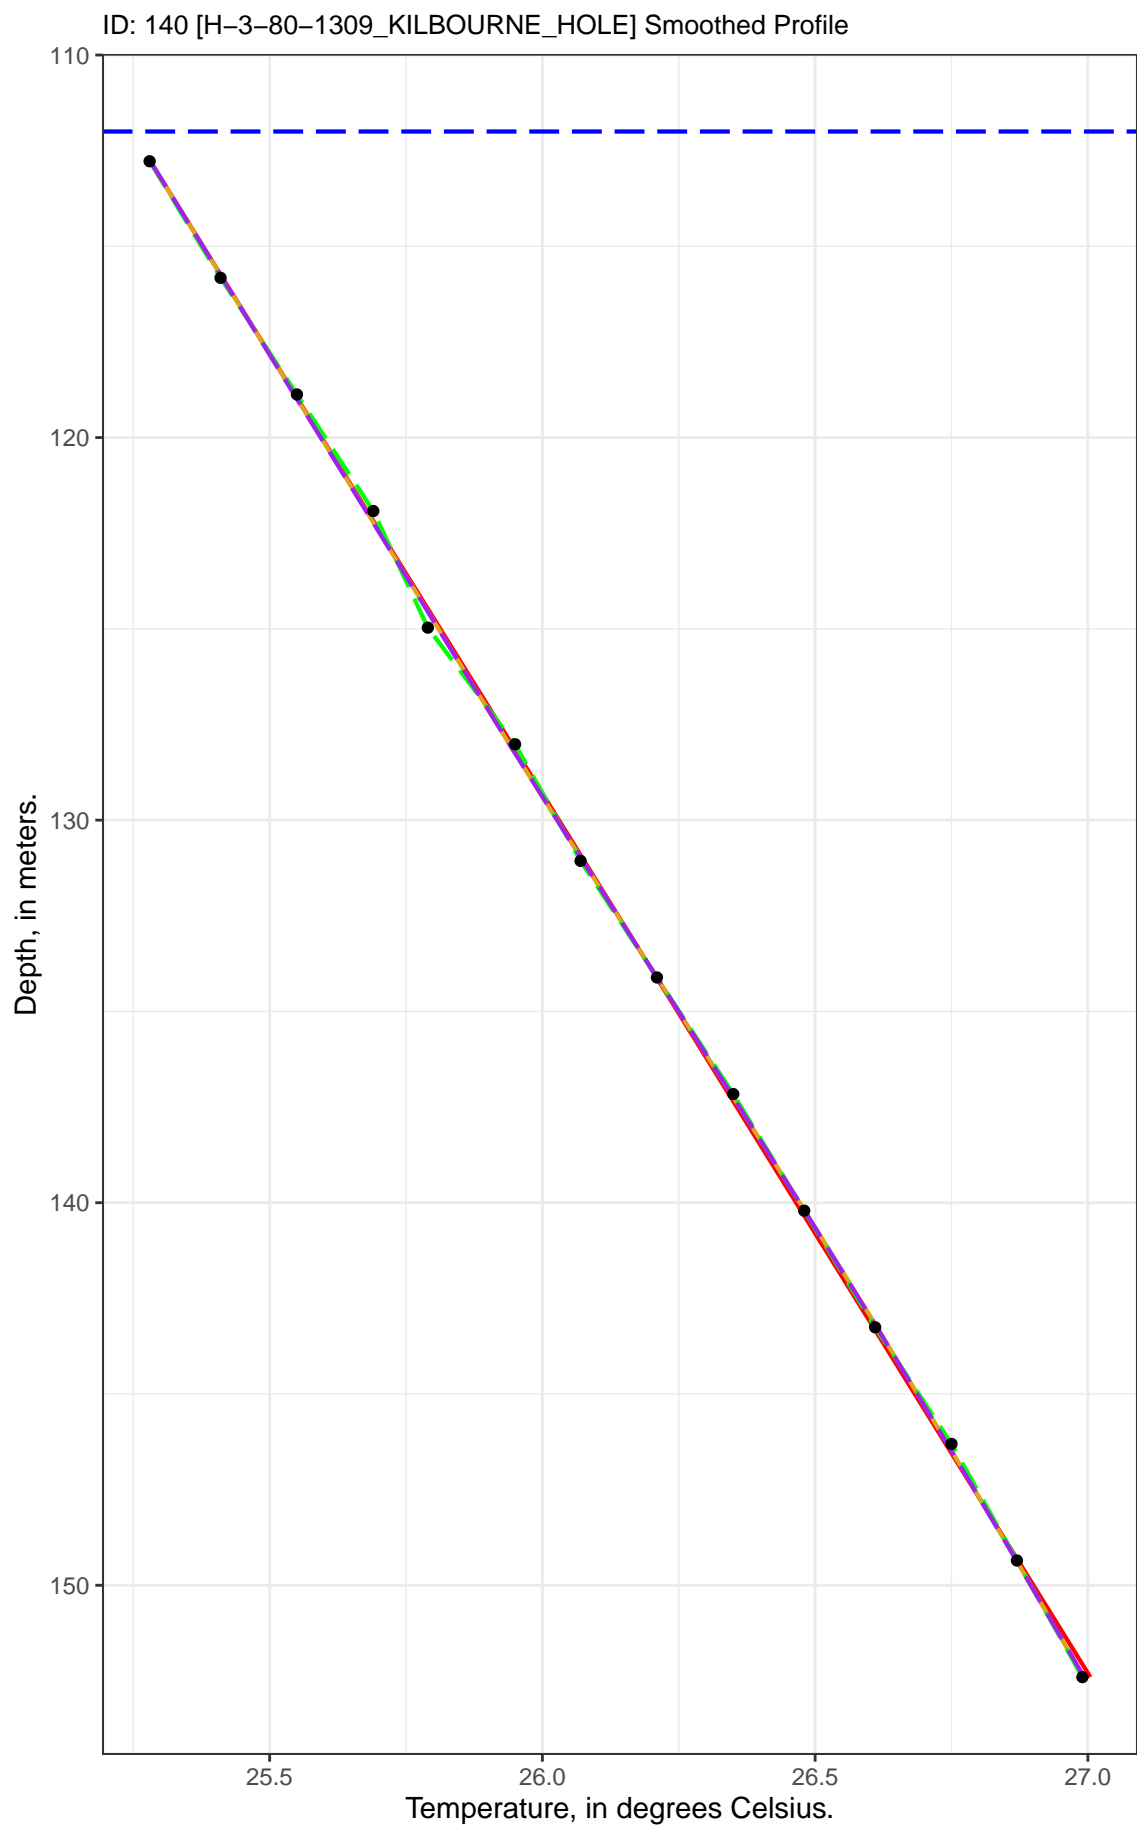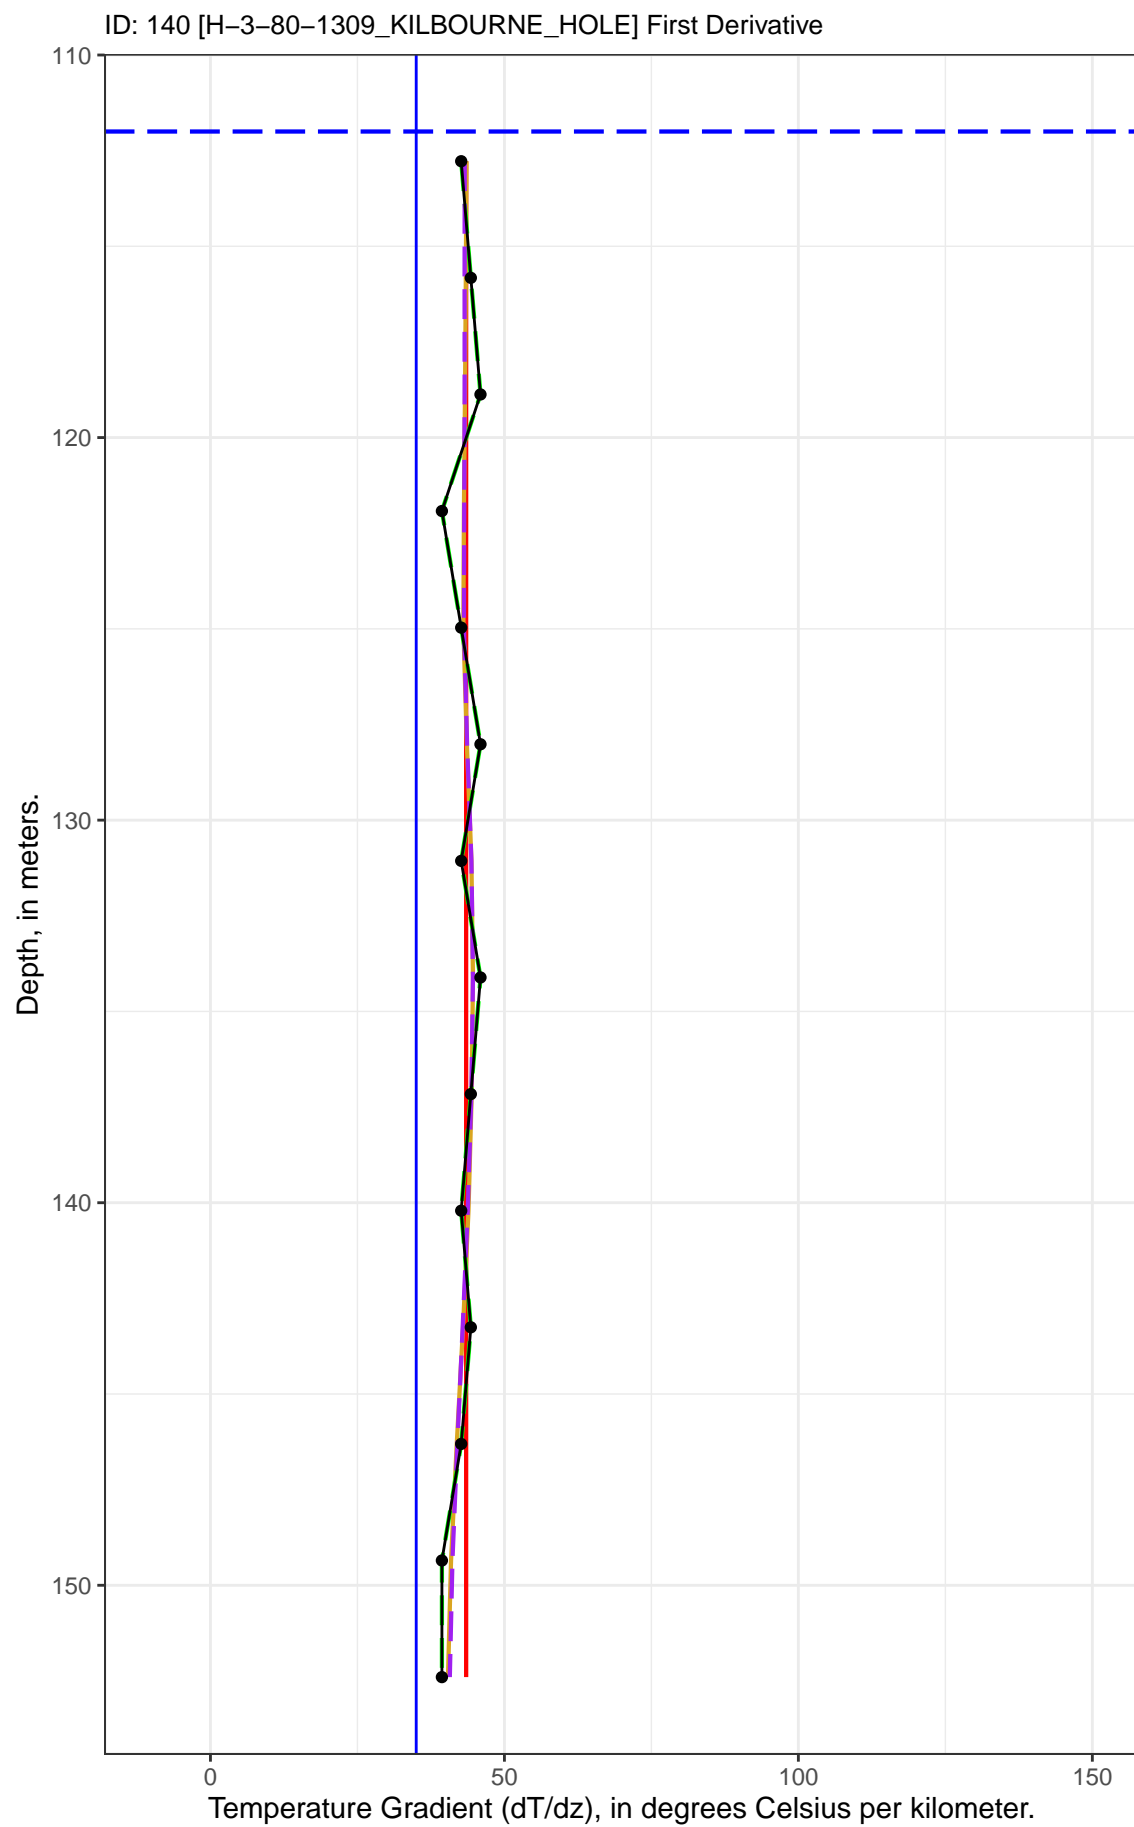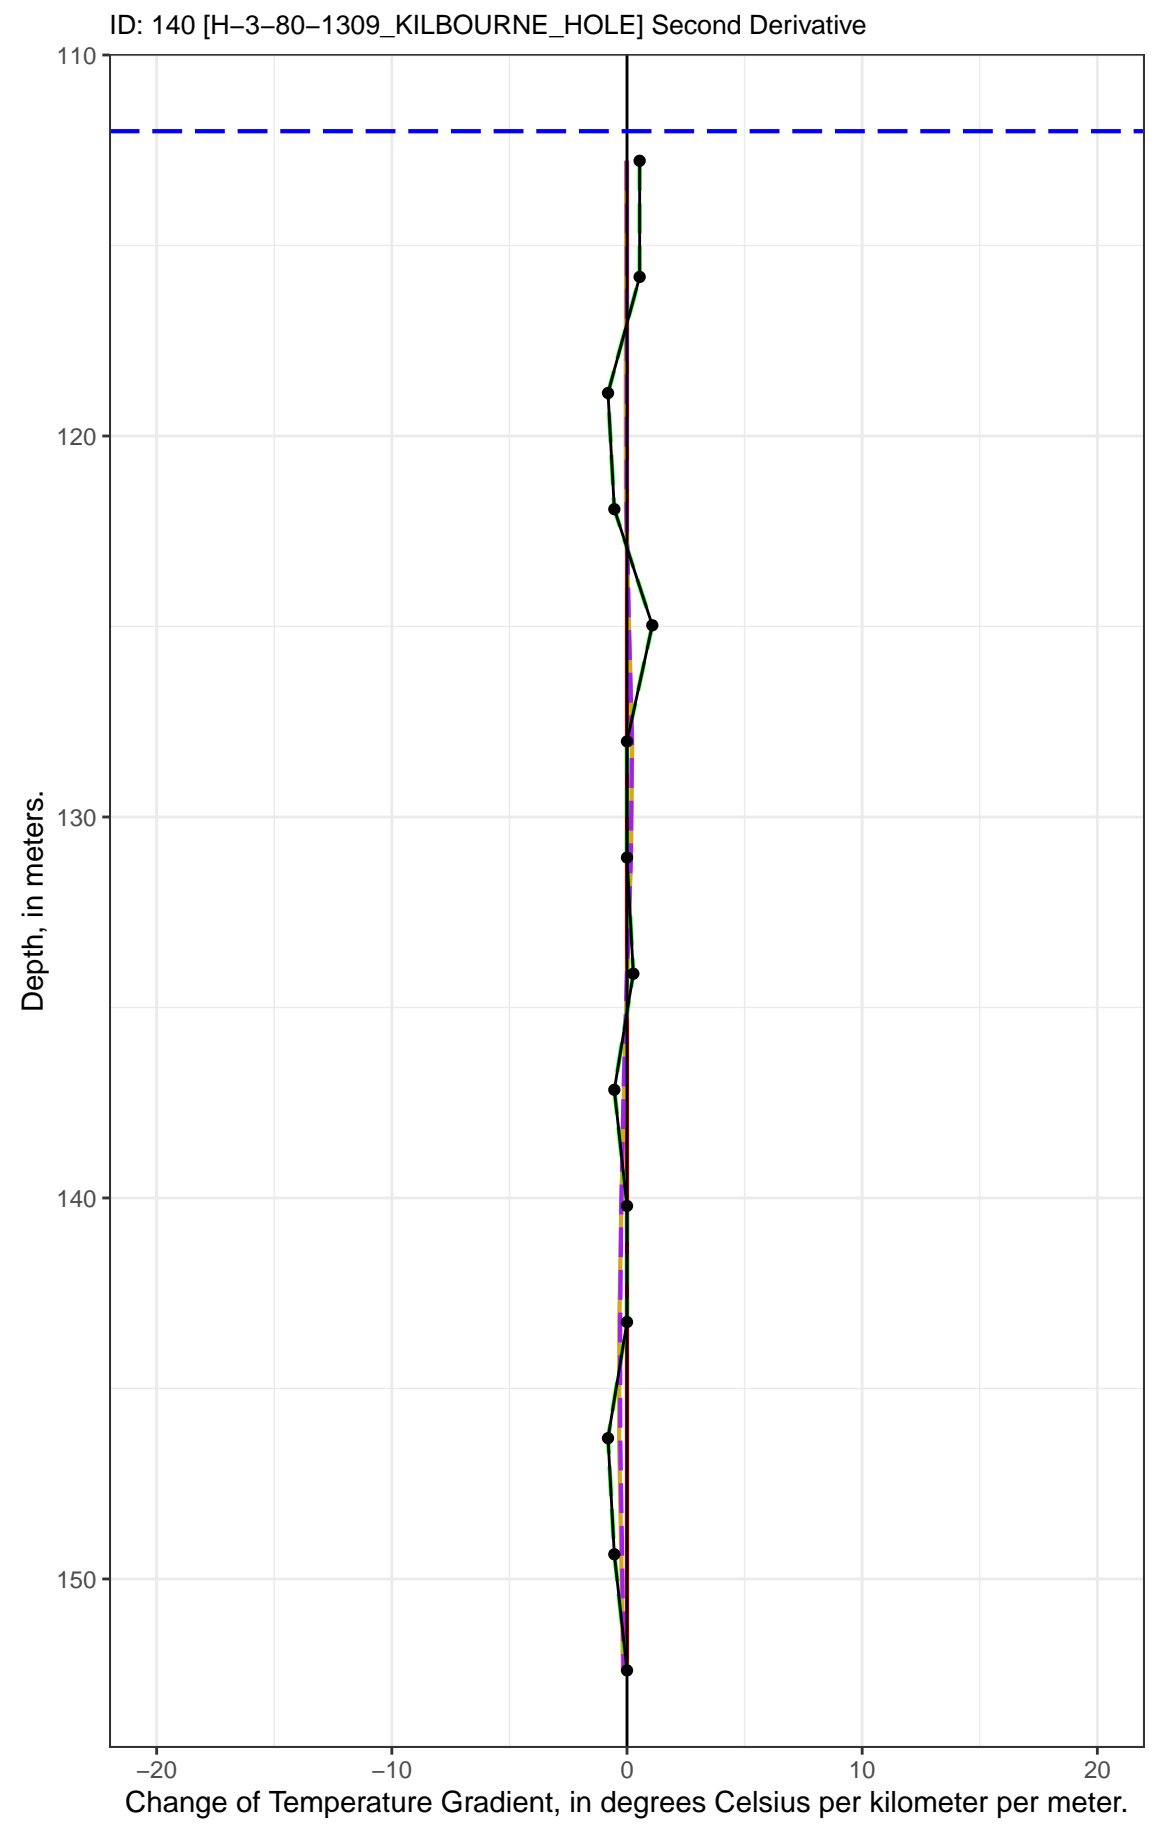

• Data — LOESS (AICC) — LOESS (constant) — LOESS (GCV) — Spline

• Data — LOESS (AICC) — LOESS (constant) — LOESS (GCV) — Spline

• Data — LOESS (AICC) — LOESS (constant) — LOESS (GCV) — Spline

ID: 141 [H-3-80-1314\_KILBOURNE\_HOLE] Smoothed Profile

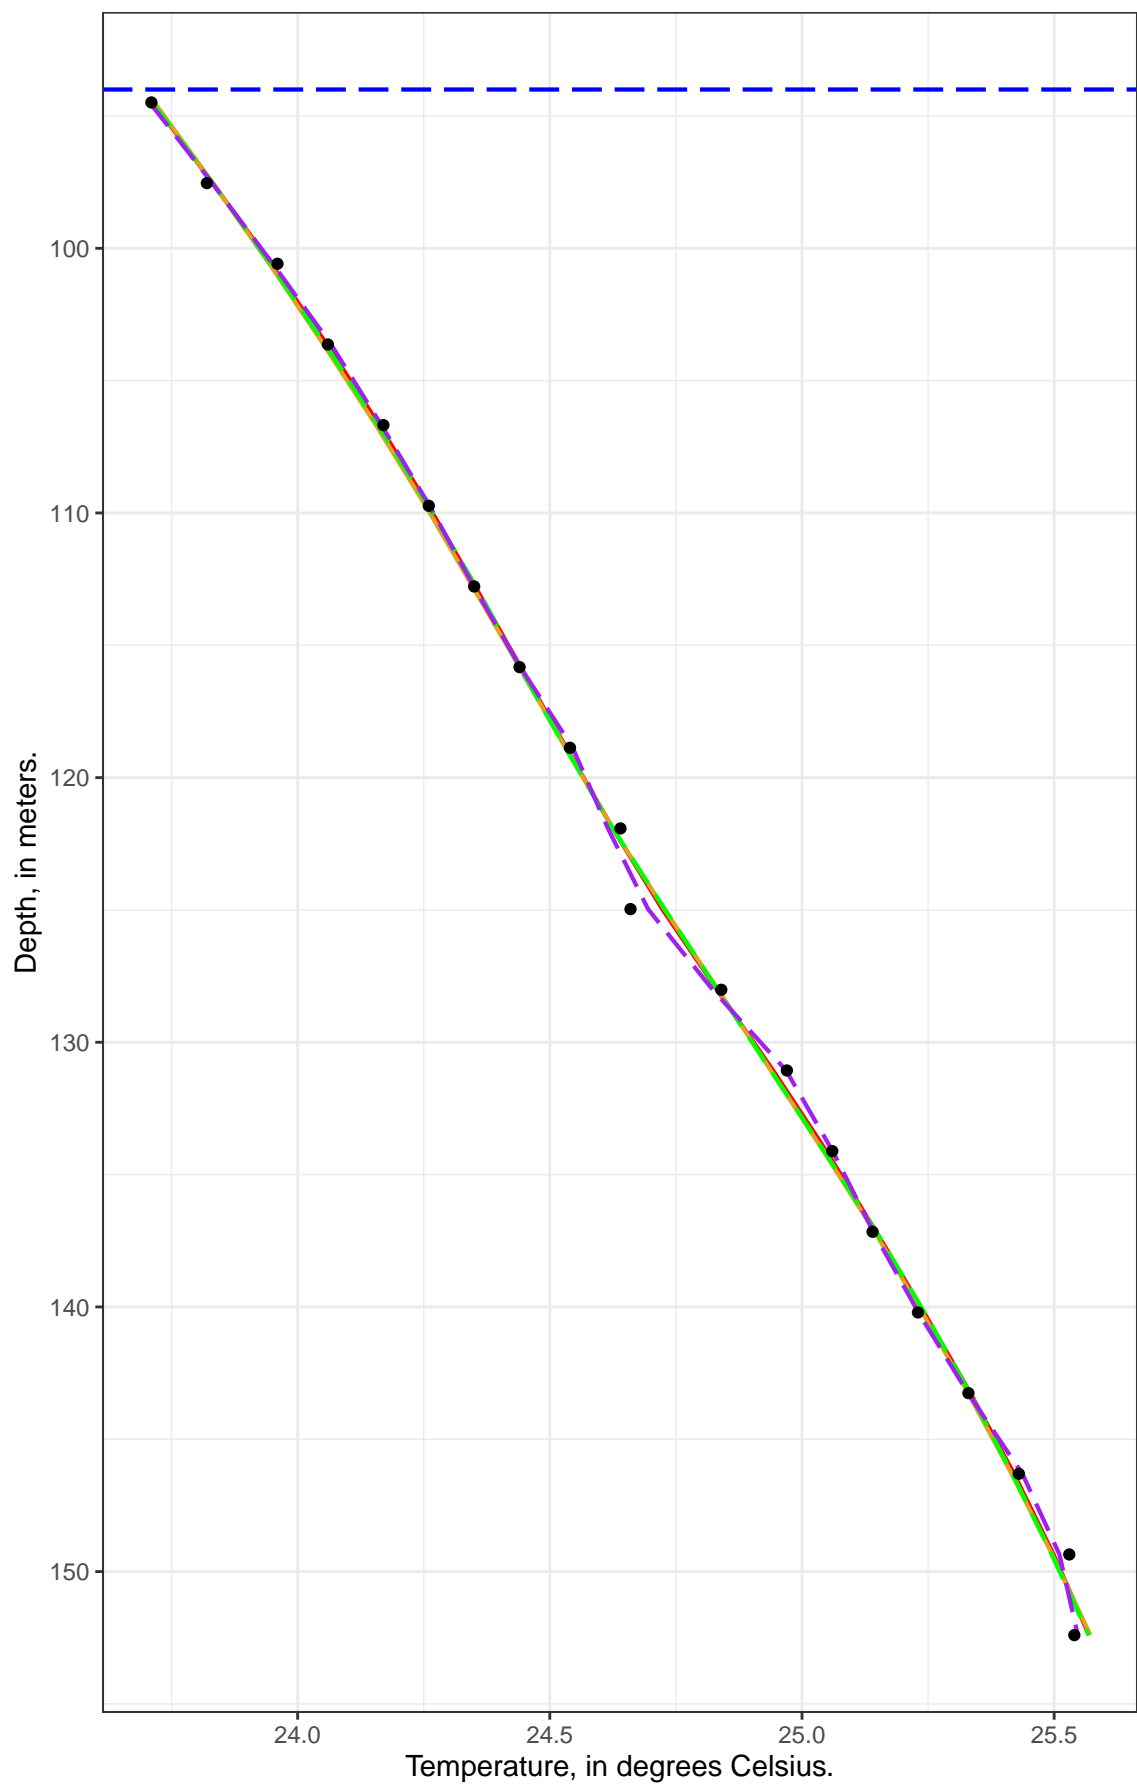

ID: 141 [H-3-80-1314\_KILBOURNE\_HOLE] First Derivative

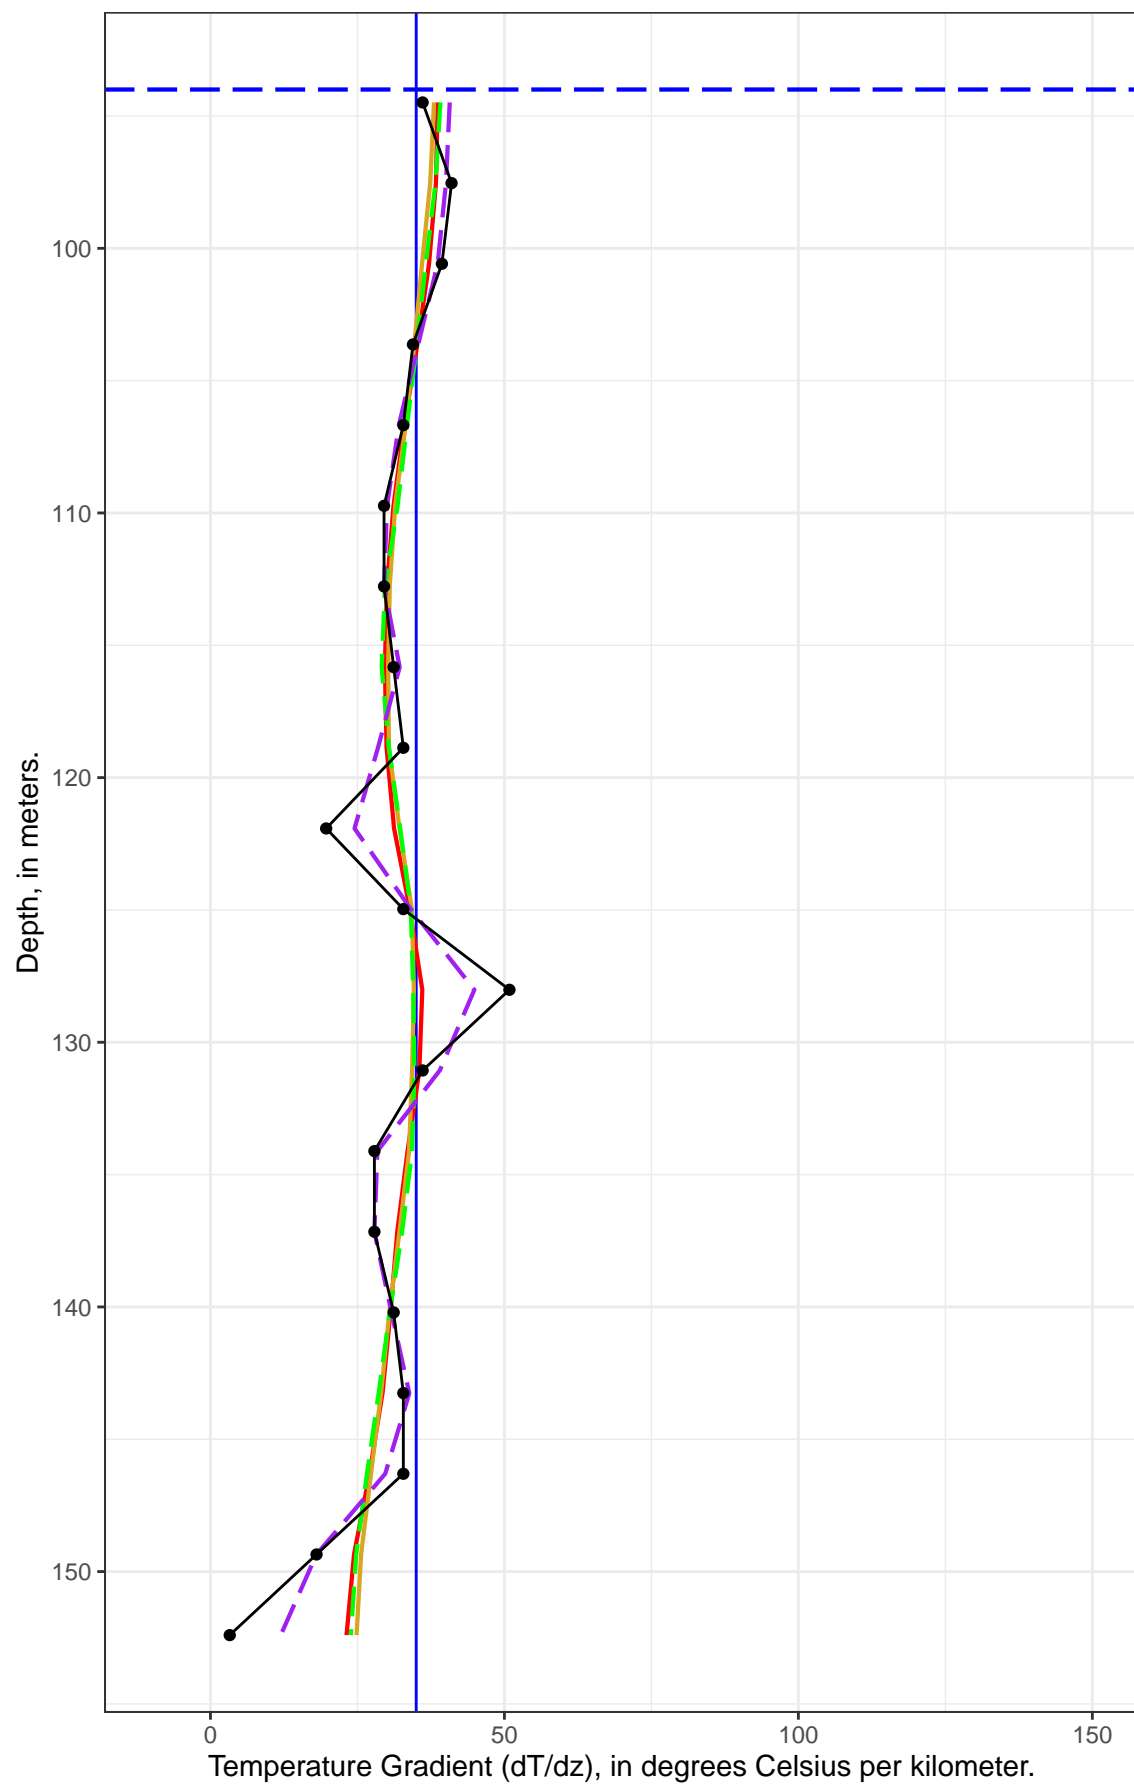

ID: 141 [H-3-80-1314\_KILBOURNE\_HOLE] Second Derivative

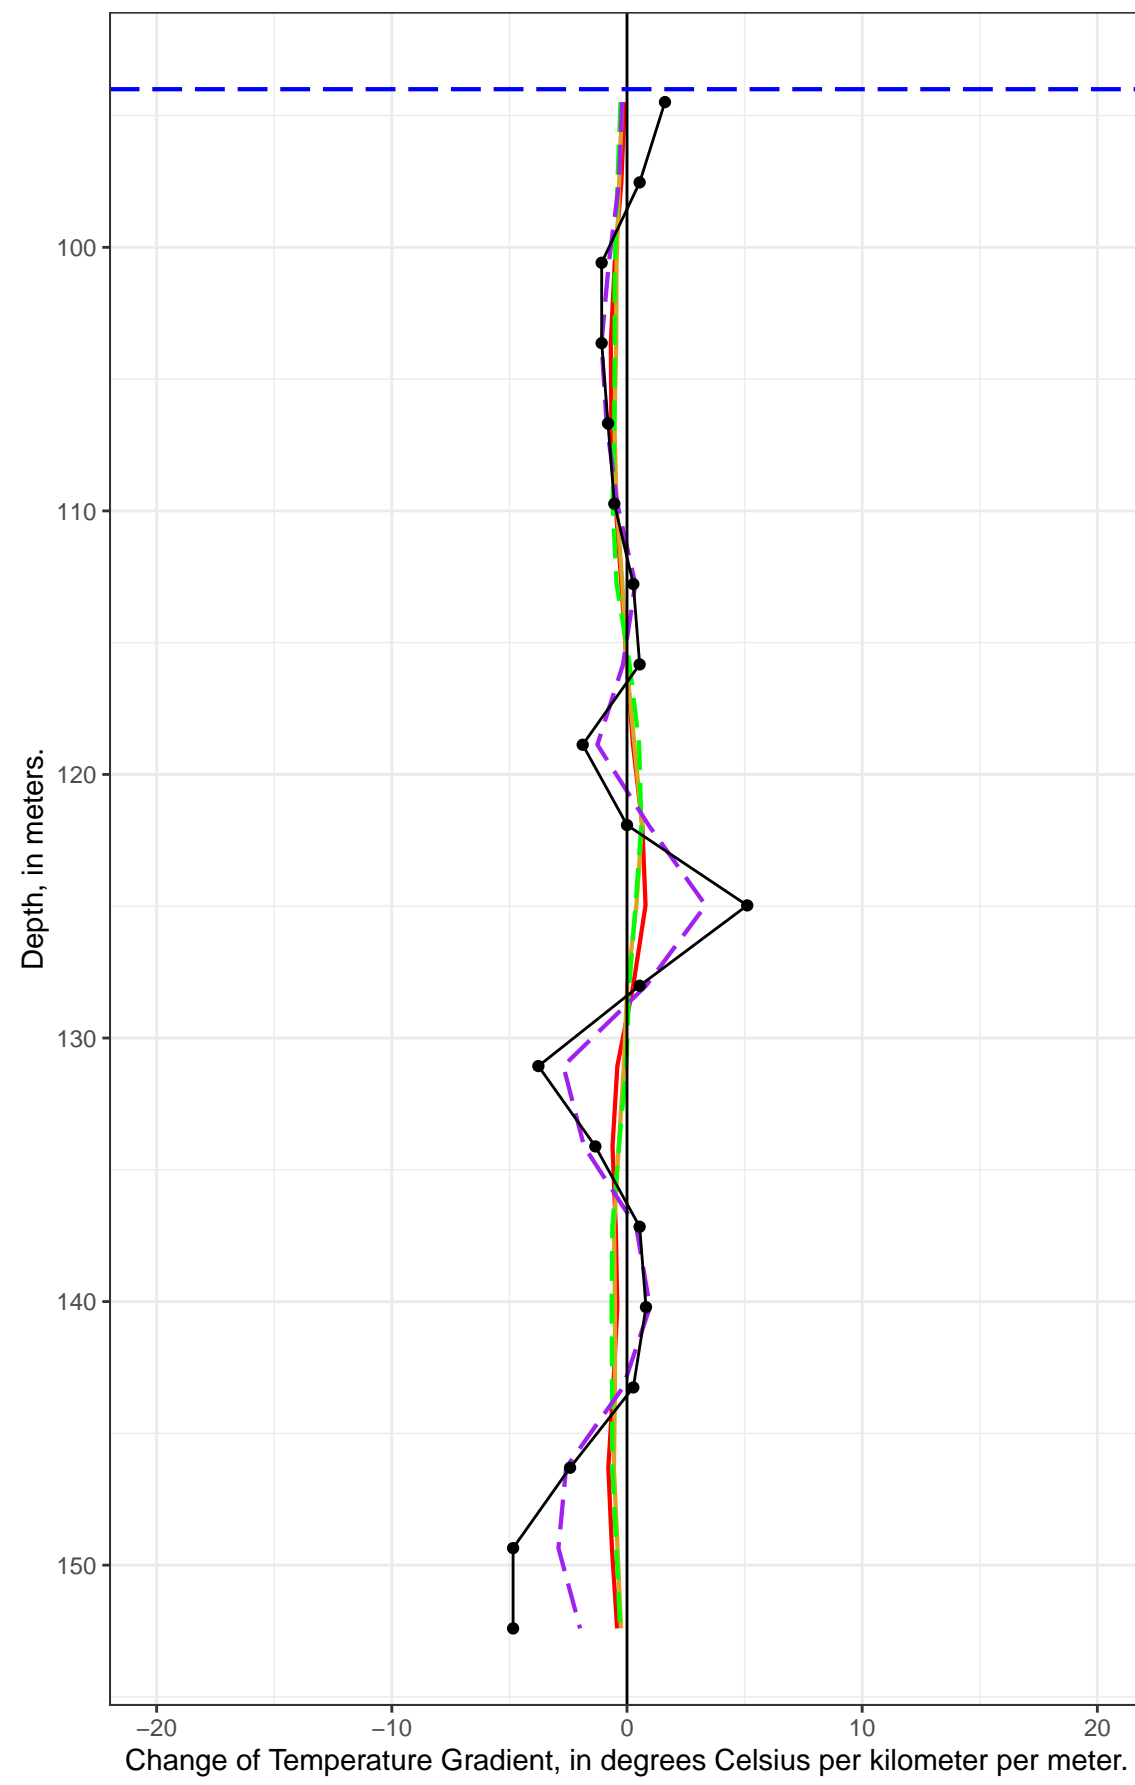

• Data — LOESS (AICC) — LOESS (constant) — LOESS (GCV) — Spline

• Data — LOESS (AICC) — LOESS (constant) — LOESS (GCV) — Spline

• Data — LOESS (AICC) — LOESS (constant) — LOESS (GCV) — Spline

ID: 142 [H-3-80-1317\_KILBOURNE\_HOLE] Smoothed Profile

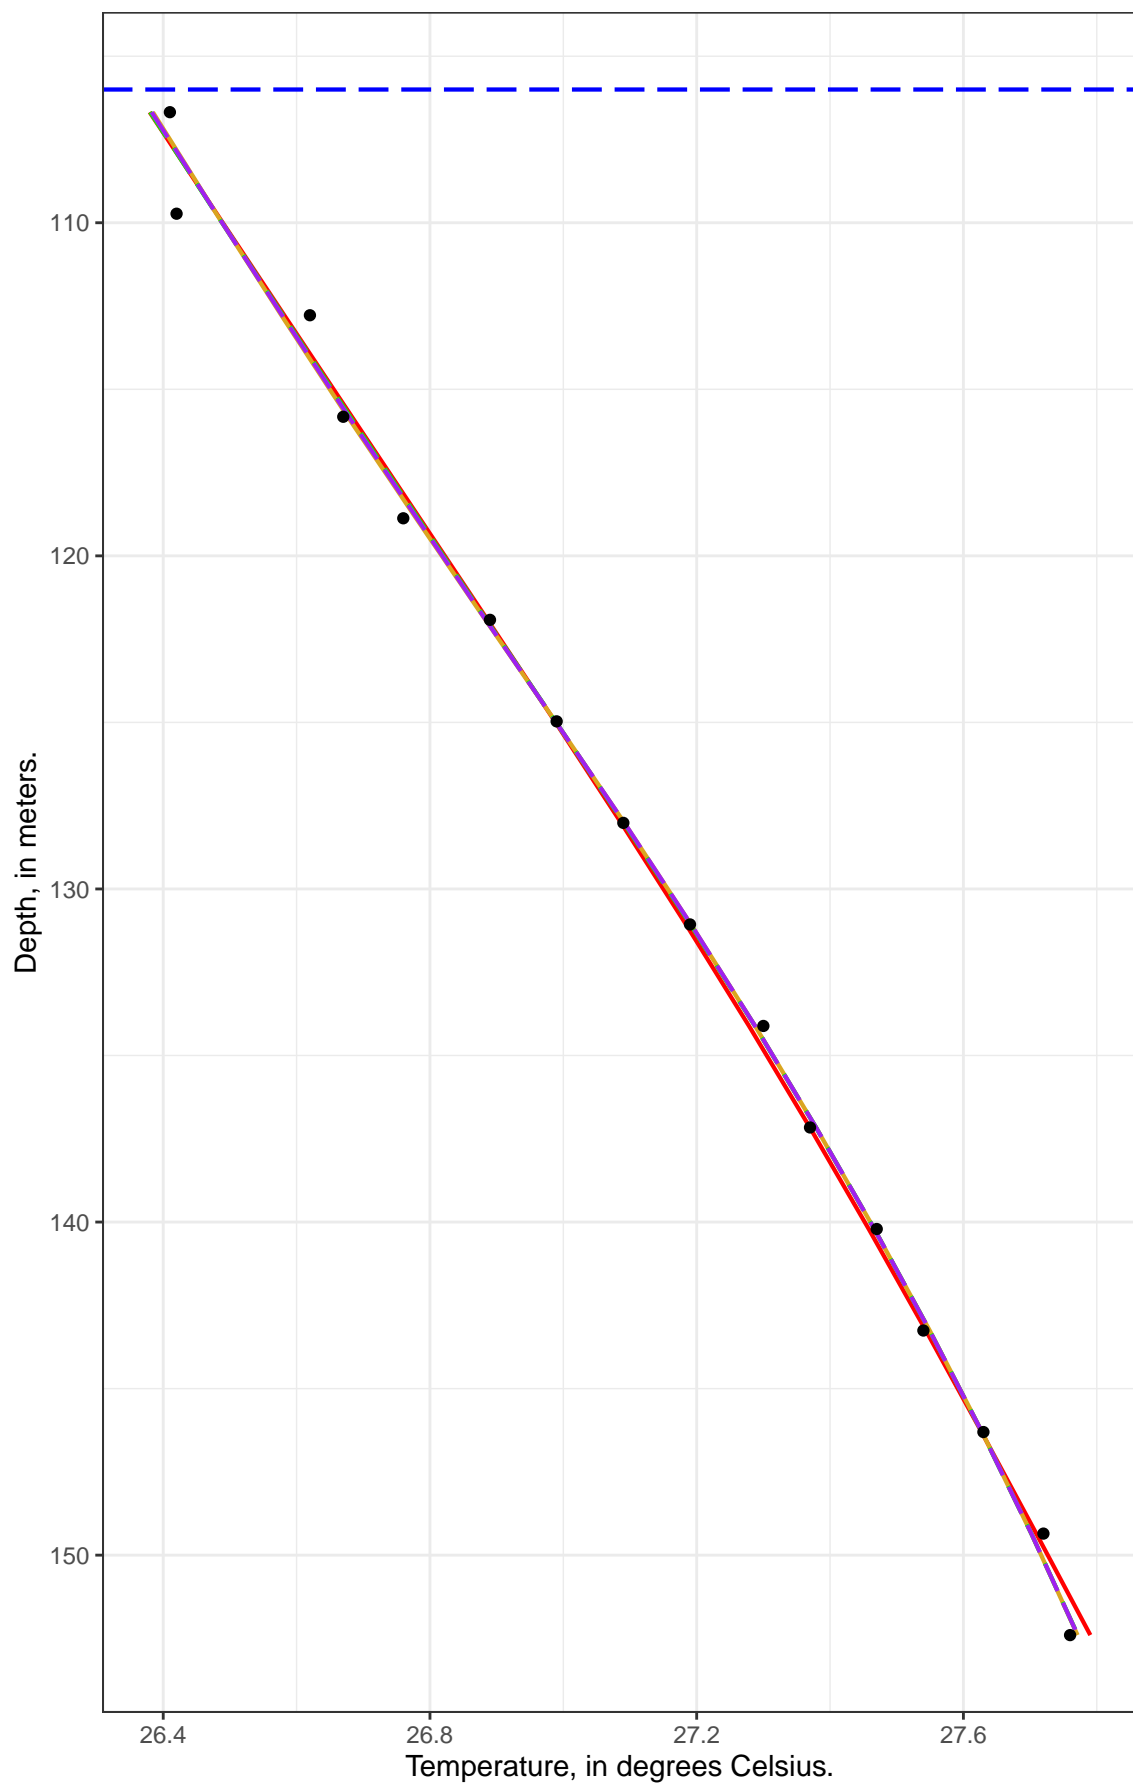

ID: 142 [H-3-80-1317\_KILBOURNE\_HOLE] First Derivative

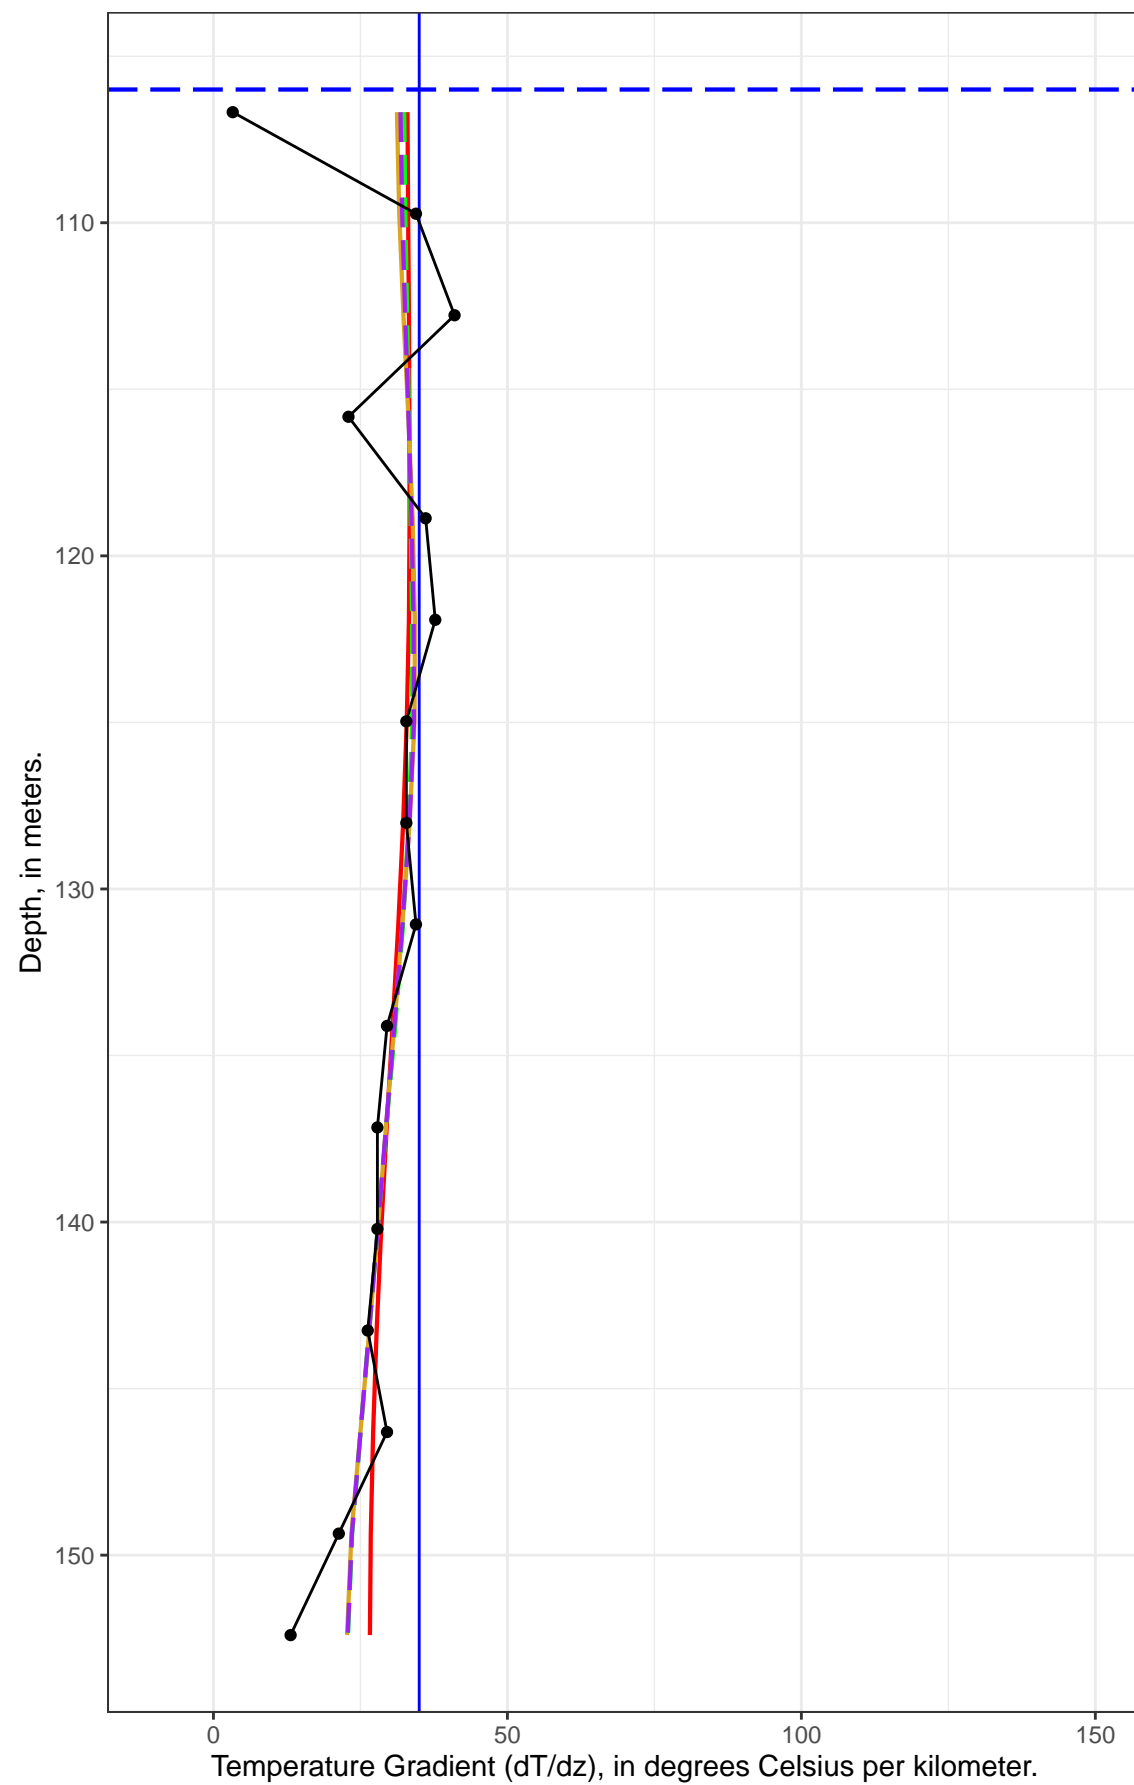

ID: 142 [H-3-80-1317\_KILBOURNE\_HOLE] Second Derivative

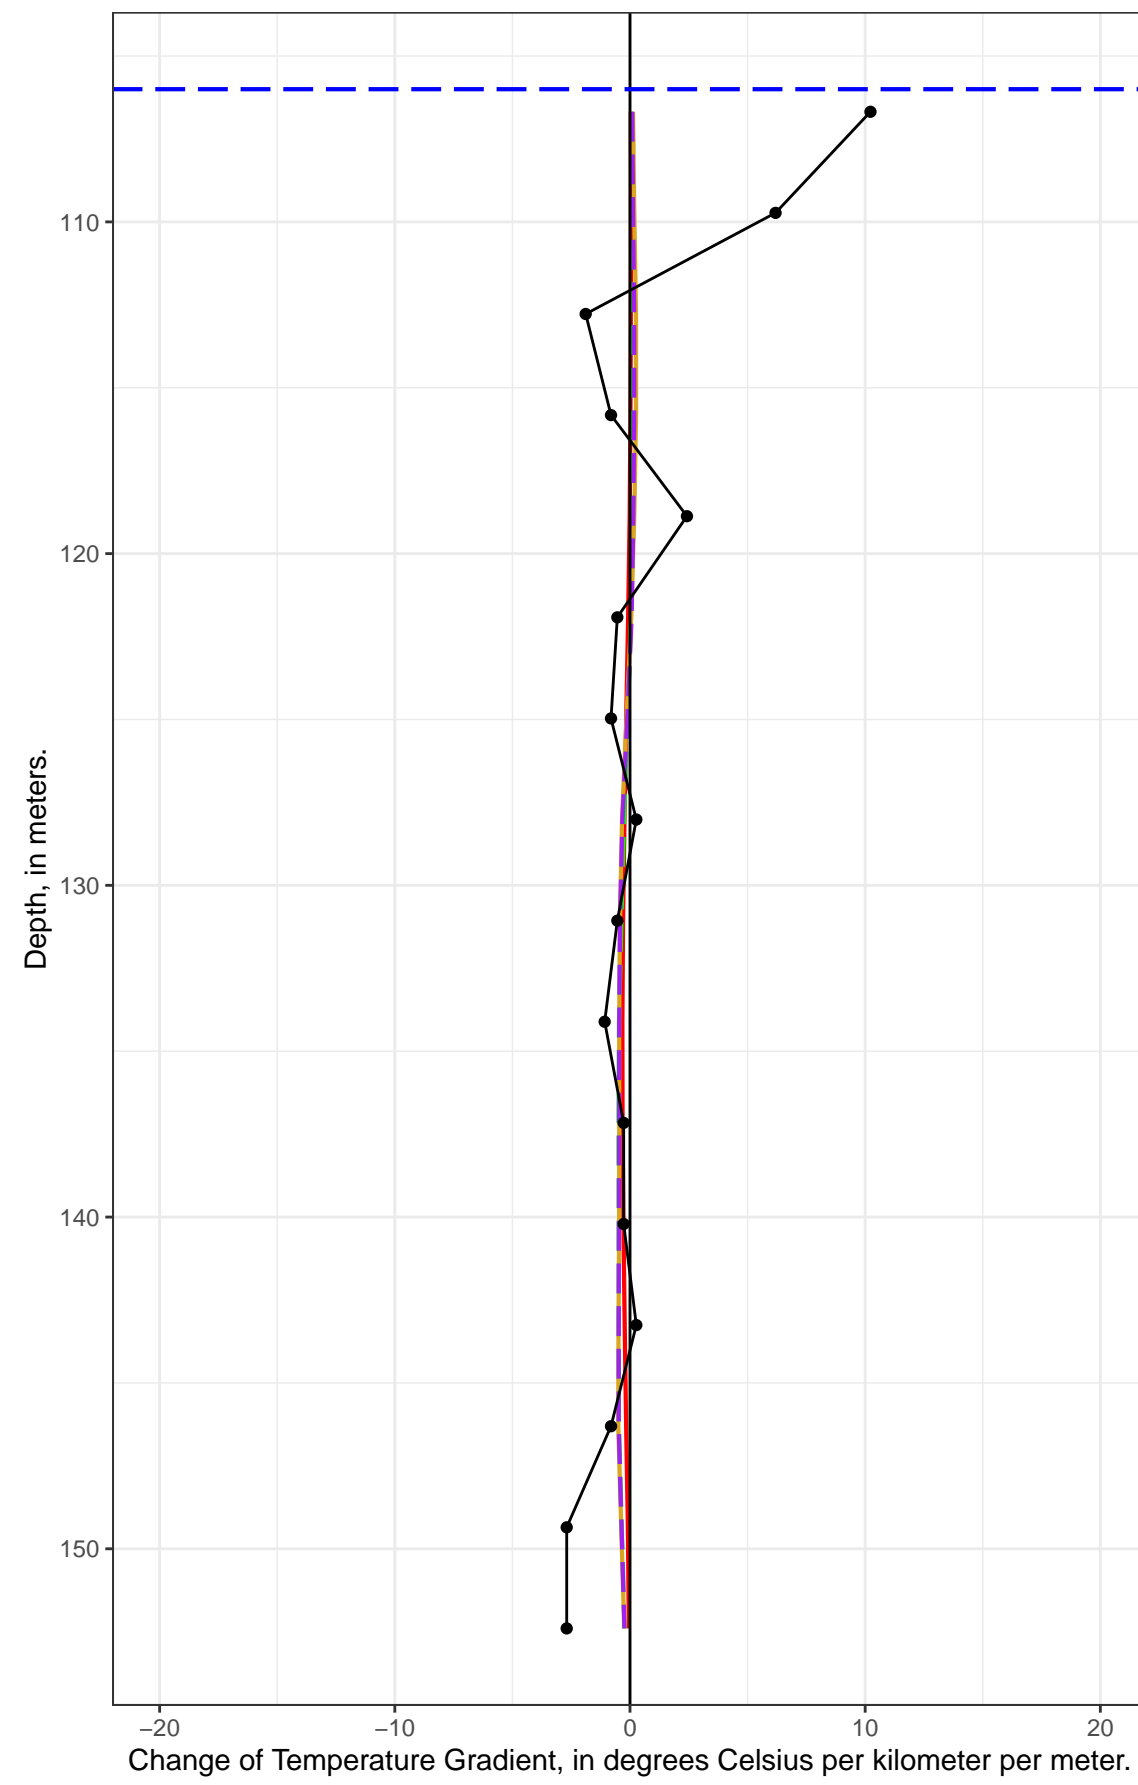

• Data — LOESS (AICC) — LOESS (constant) — LOESS (GCV) — Spline

• Data — LOESS (AICC) — LOESS (constant) — LOESS (GCV) — Spline

• Data — LOESS (AICC) — LOESS (constant) — LOESS (GCV) — Spline

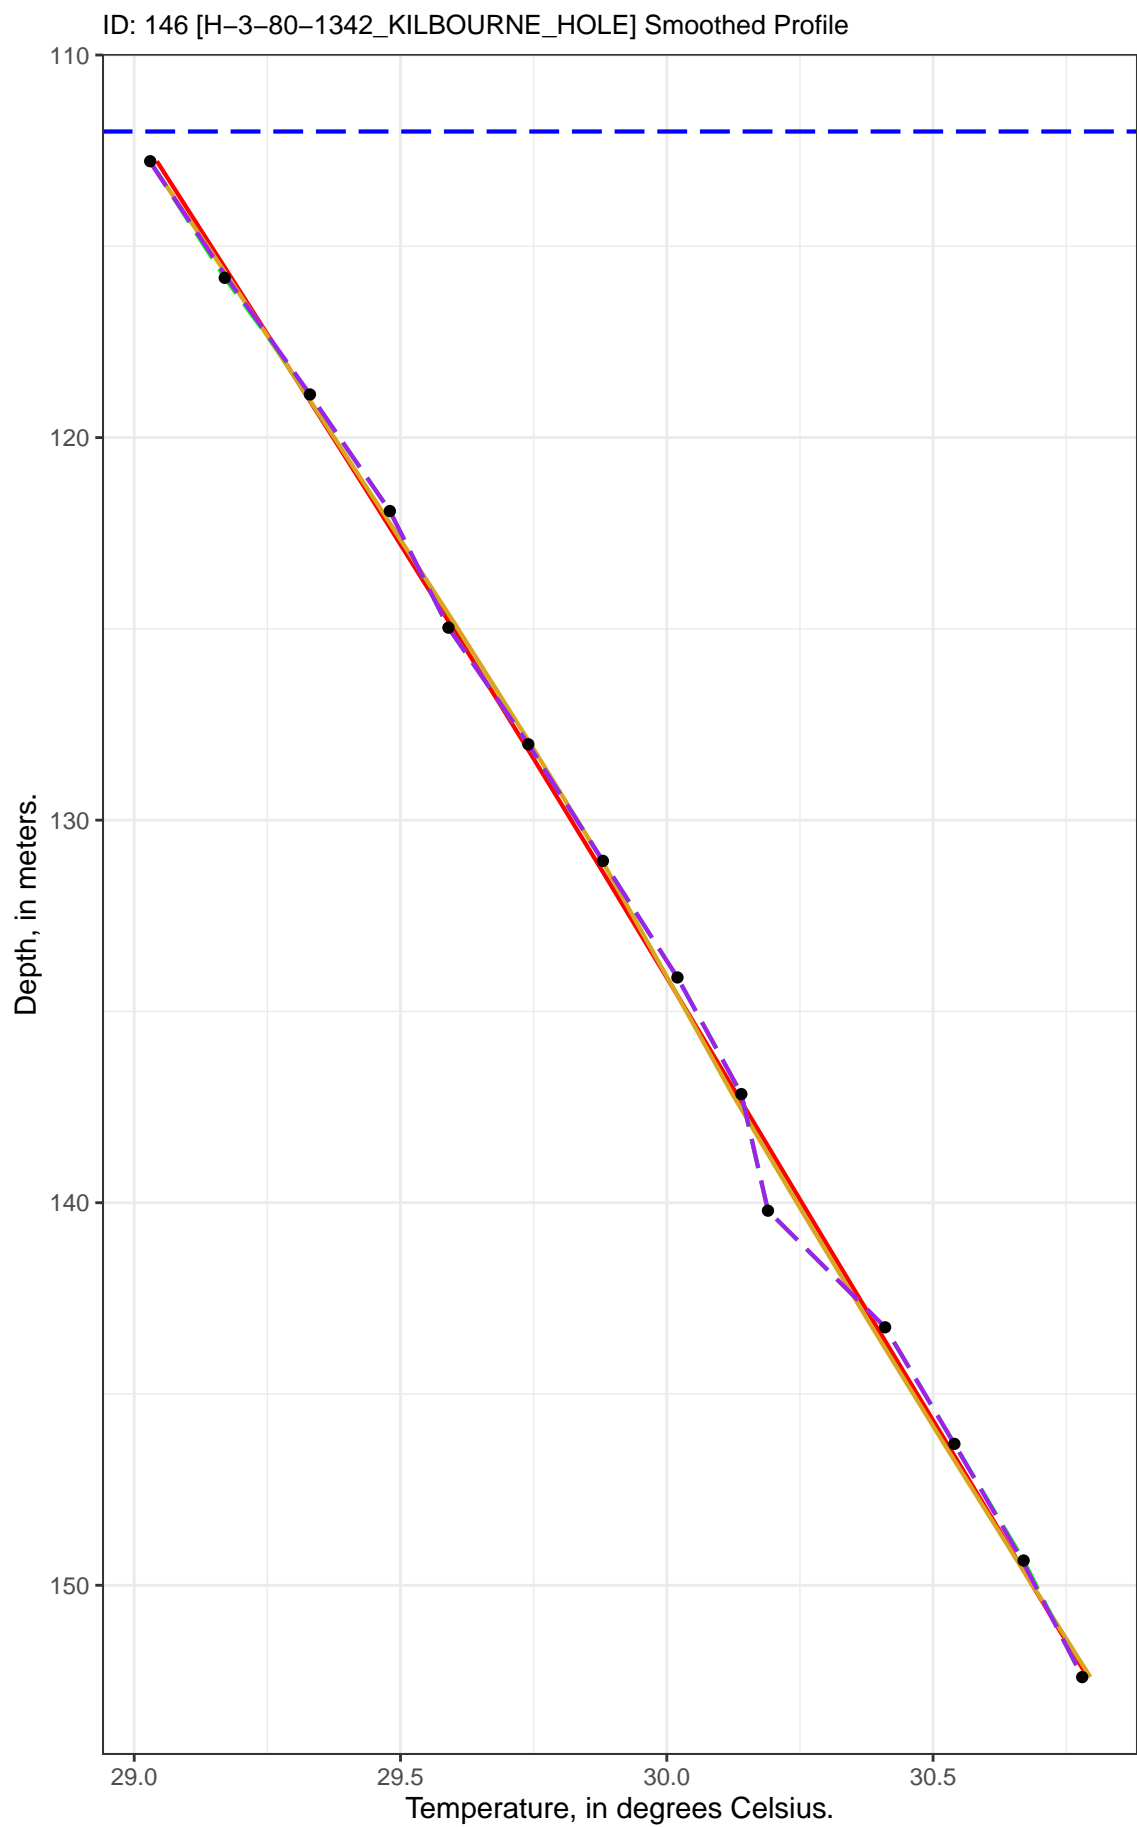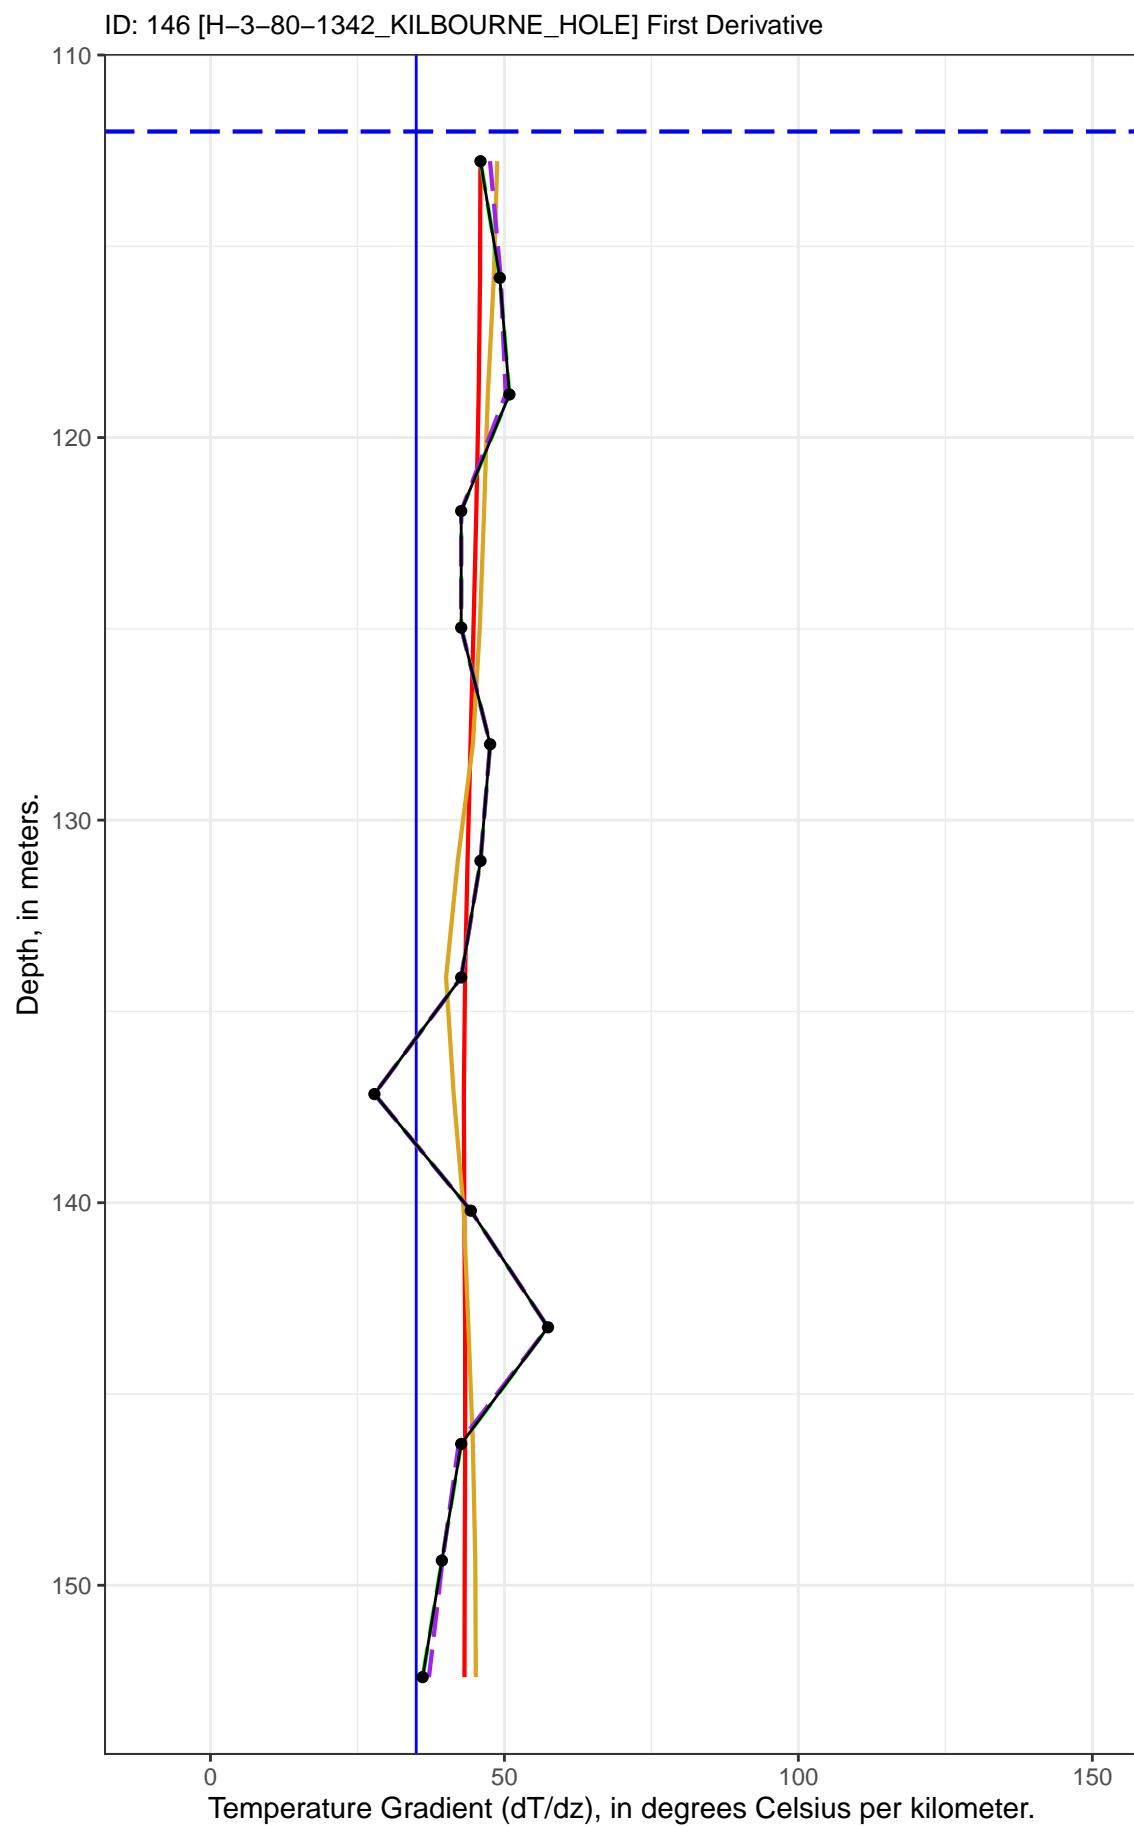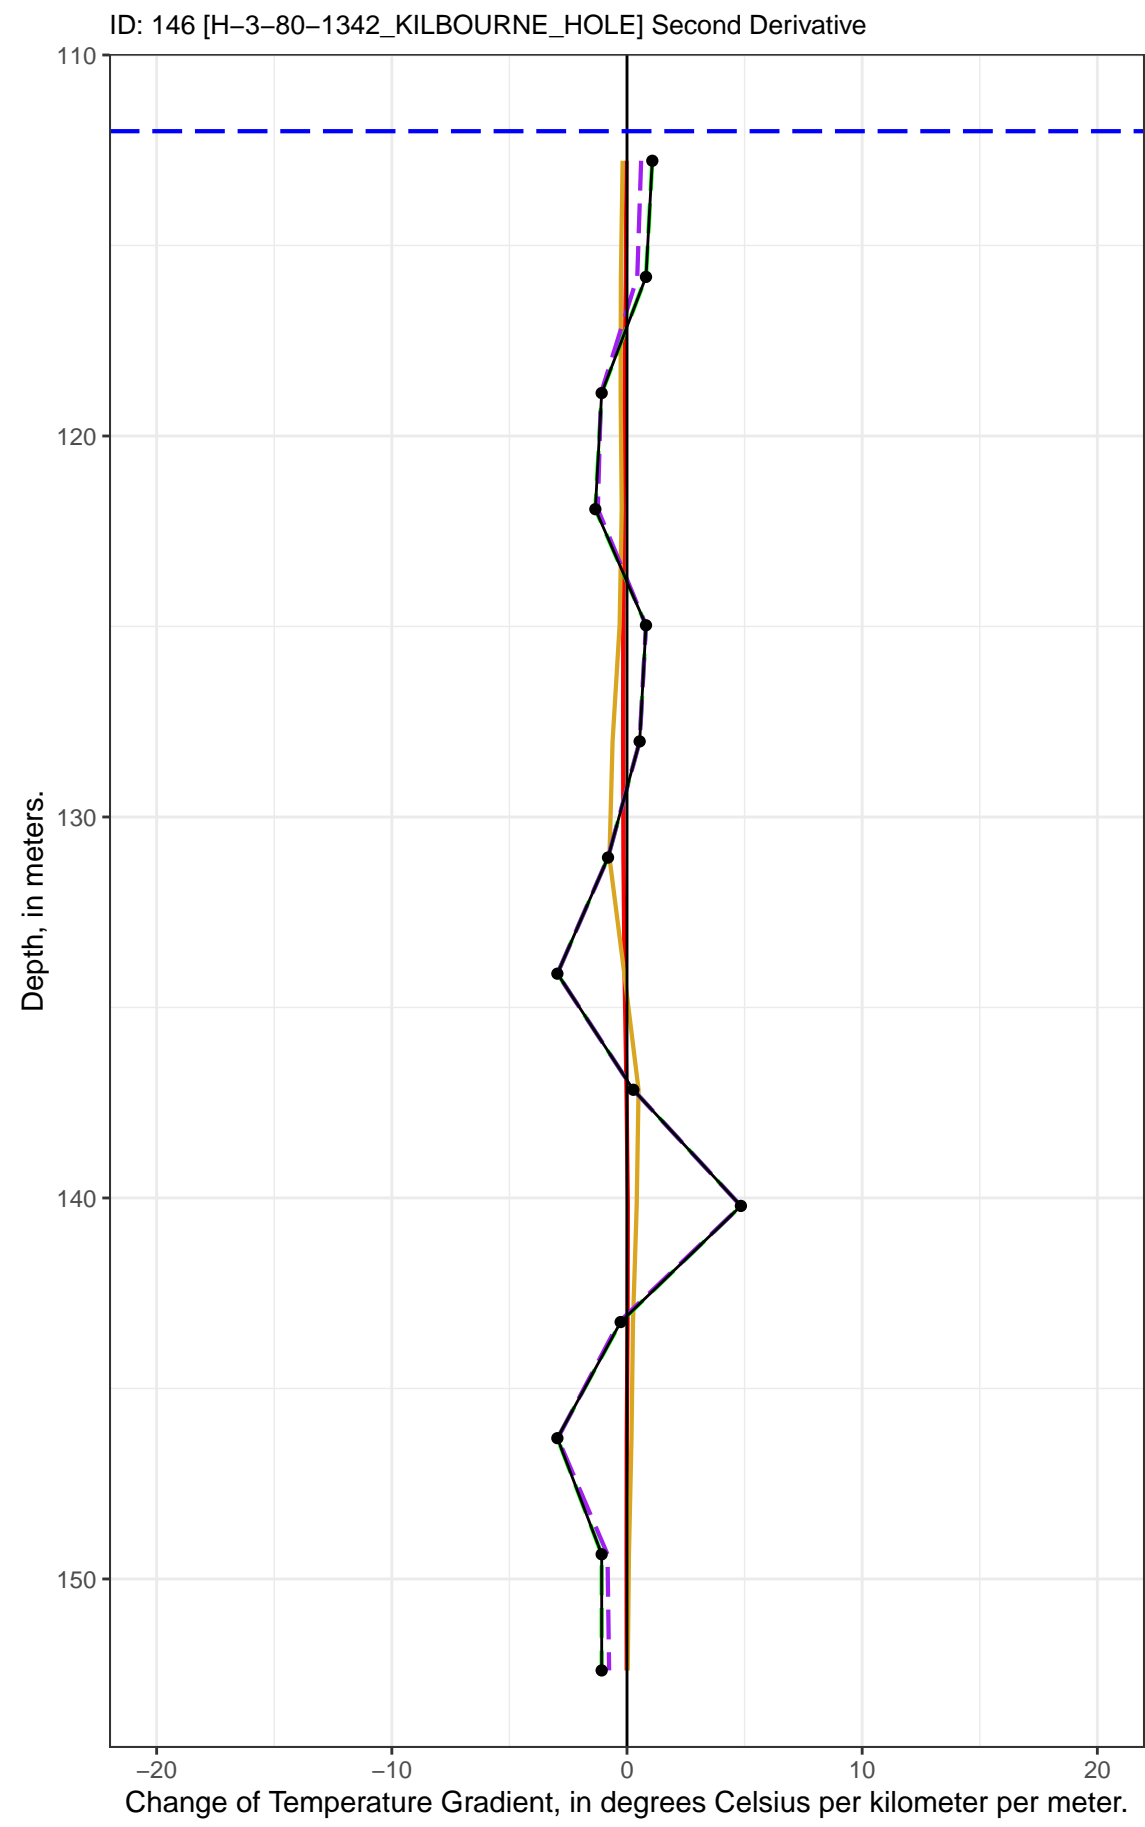

• Data • LOESS (AICC) • LOESS (constant) • LOESS (GCV) • Spline

• Data • LOESS (AICC) • LOESS (constant) • LOESS (GCV) • Spline

• Data • LOESS (AICC) • LOESS (constant) • LOESS (GCV) • Spline

ID: 154 [H-4-80-1224\_KILBOURNE\_HOLE] Smoothed Profile

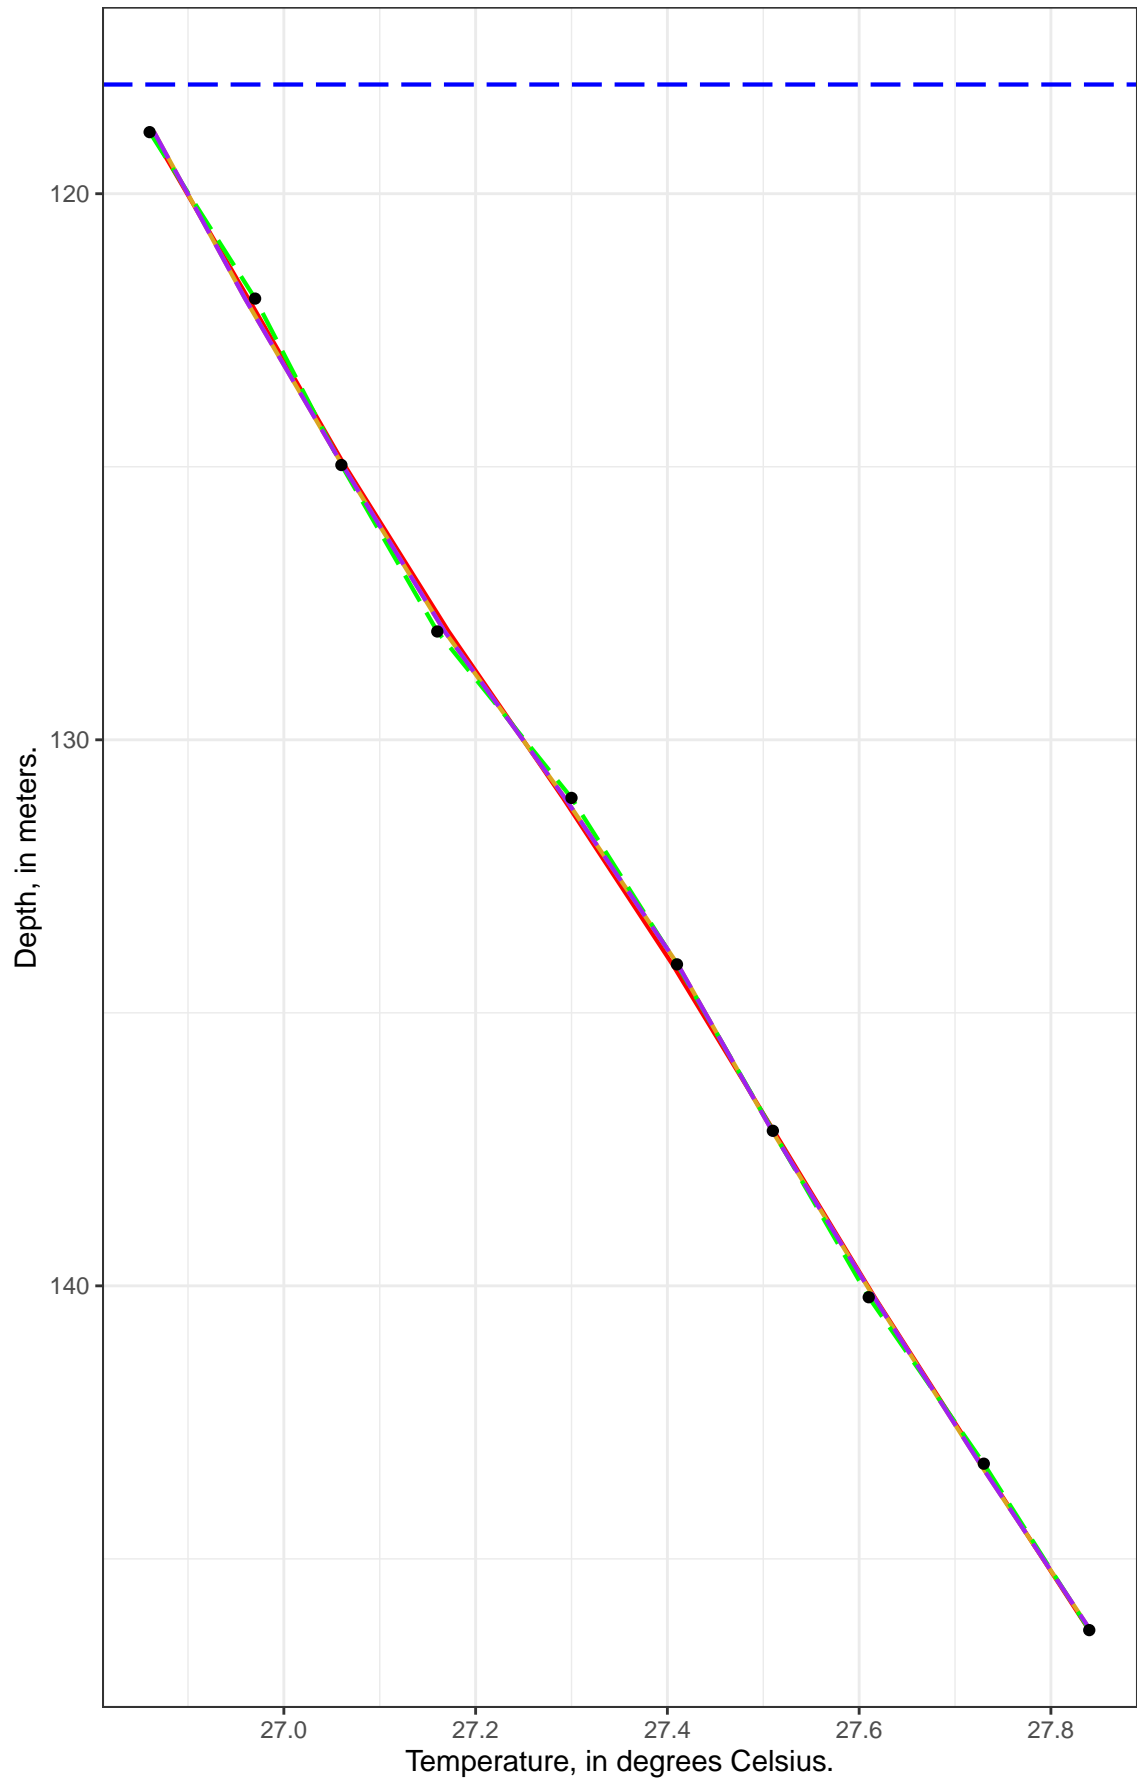

ID: 154 [H-4-80-1224\_KILBOURNE\_HOLE] First Derivative

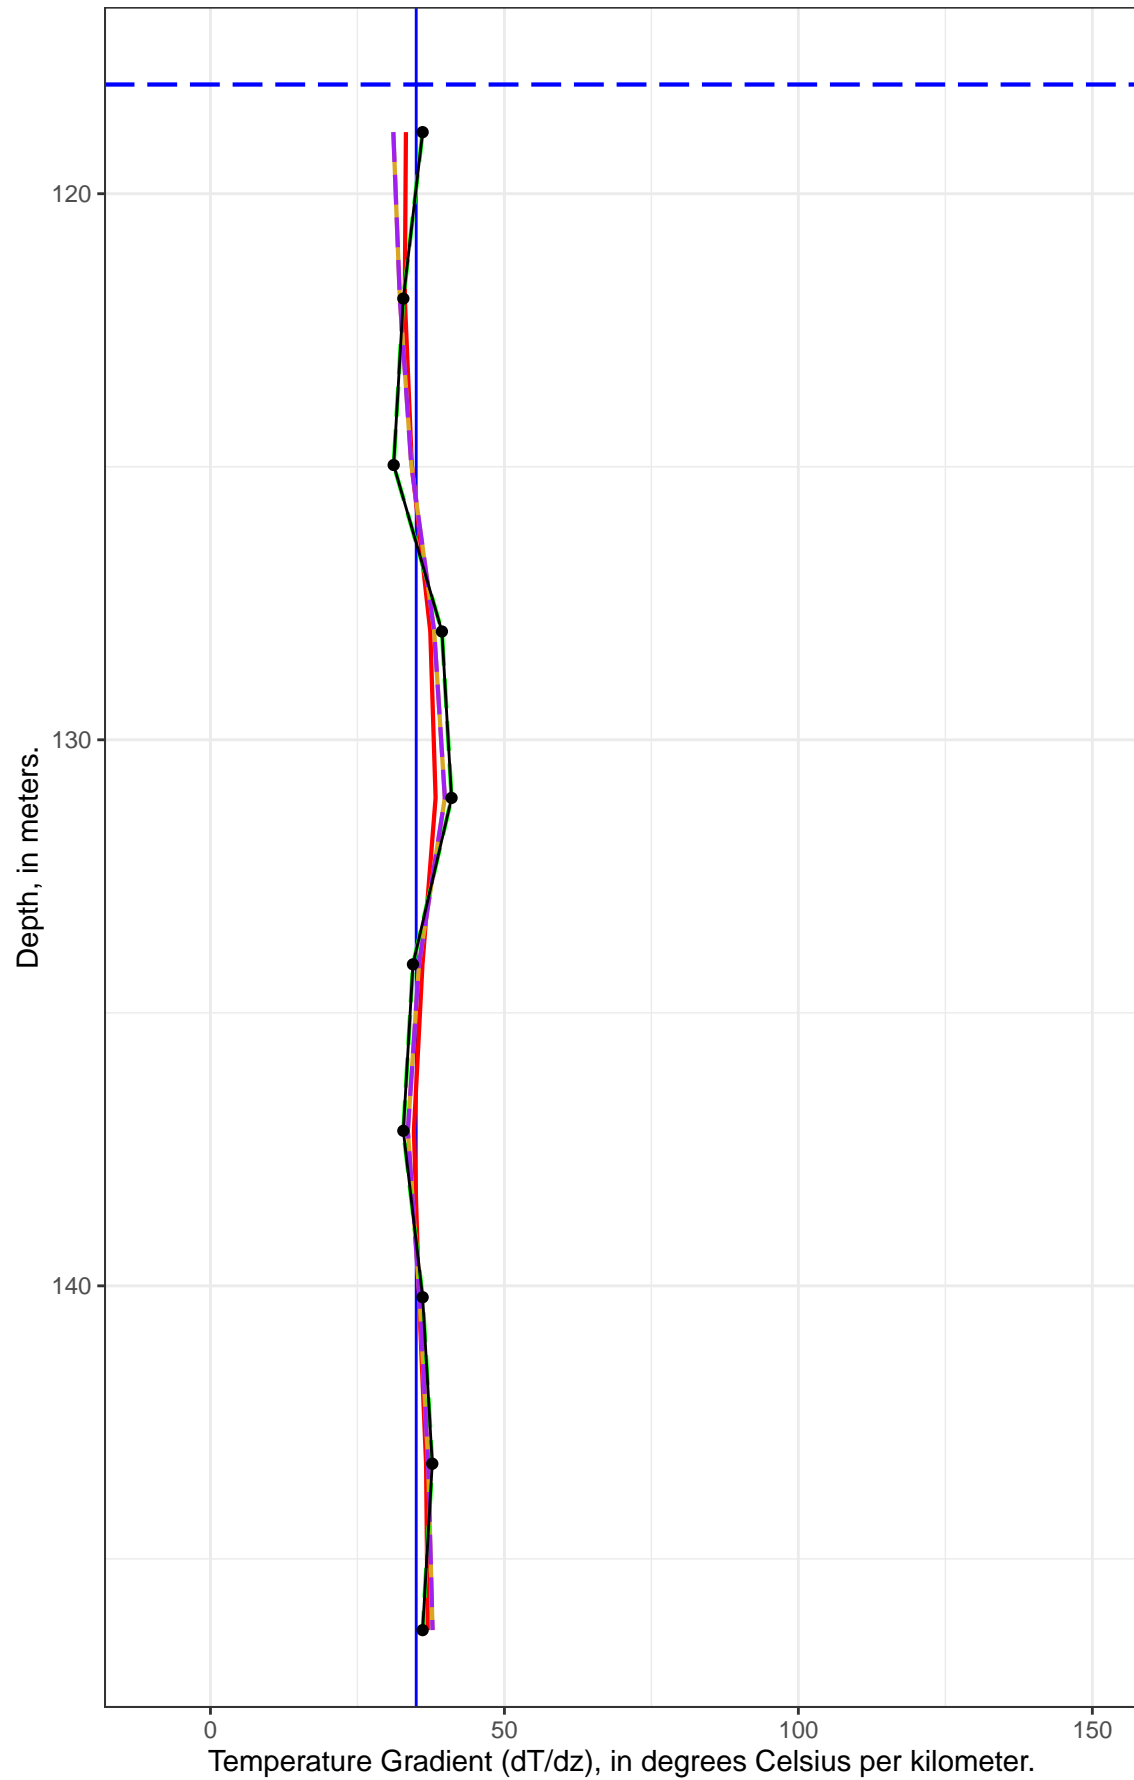

ID: 154 [H-4-80-1224\_KILBOURNE\_HOLE] Second Derivative

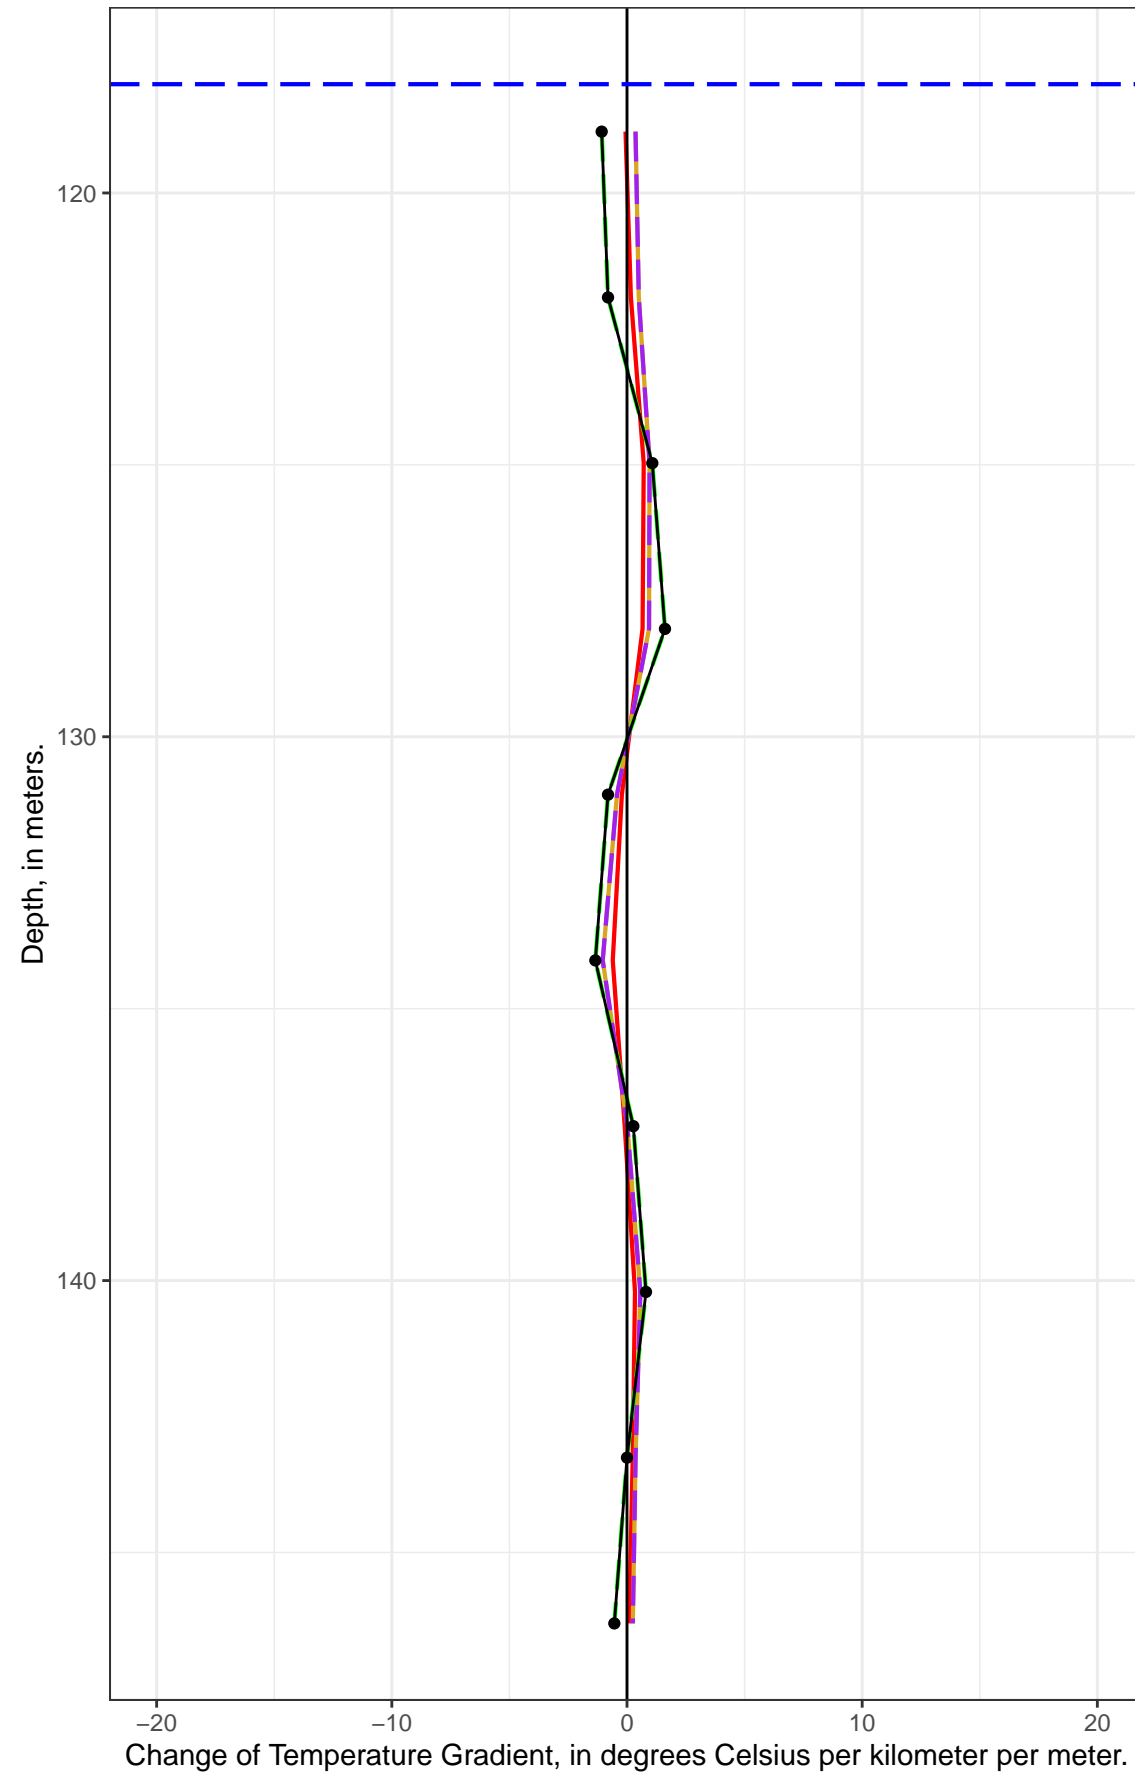

• Data — LOESS (AICC) — LOESS (constant) — LOESS (GCV) — Spline

• Data — LOESS (AICC) — LOESS (constant) — LOESS (GCV) — Spline

• Data — LOESS (AICC) — LOESS (constant) — LOESS (GCV) — Spline

ID: 160 [H-4-80-1239\_KILBOURNE\_HOLE] Smoothed Profile

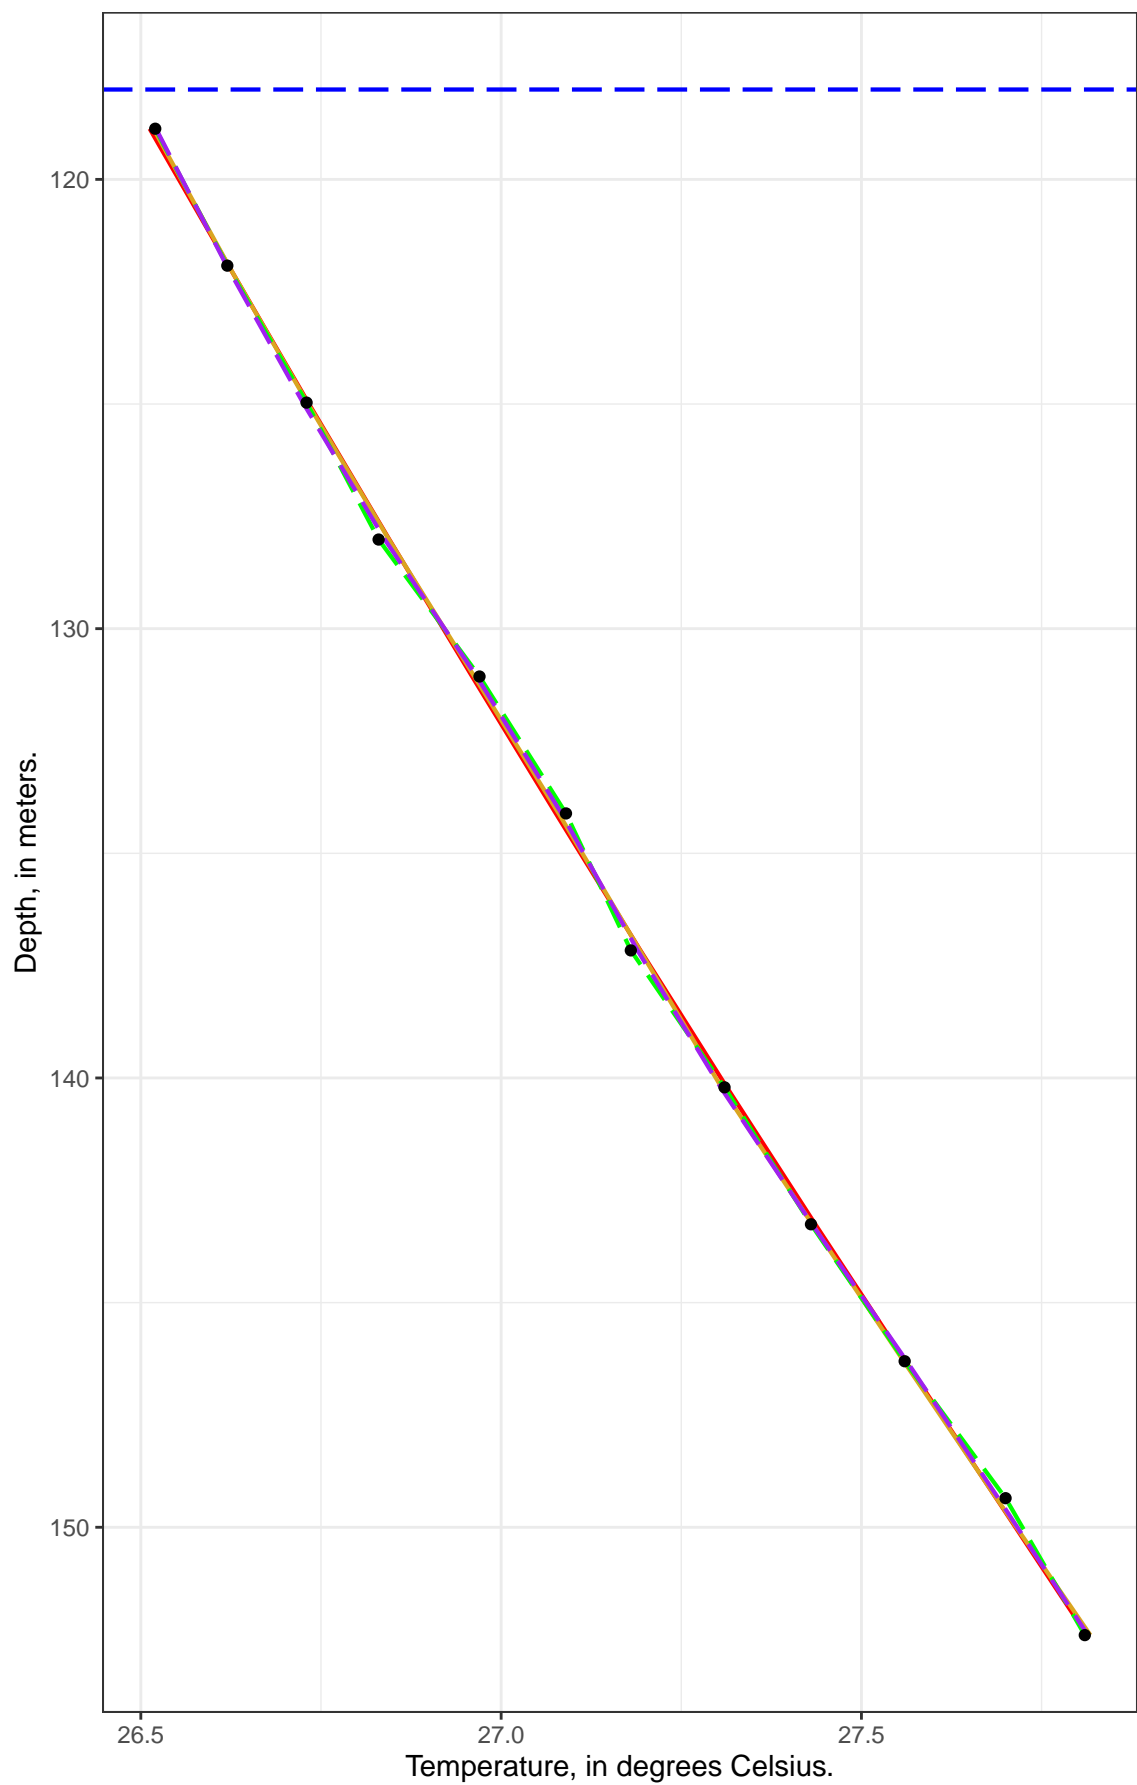

ID: 160 [H-4-80-1239\_KILBOURNE\_HOLE] First Derivative

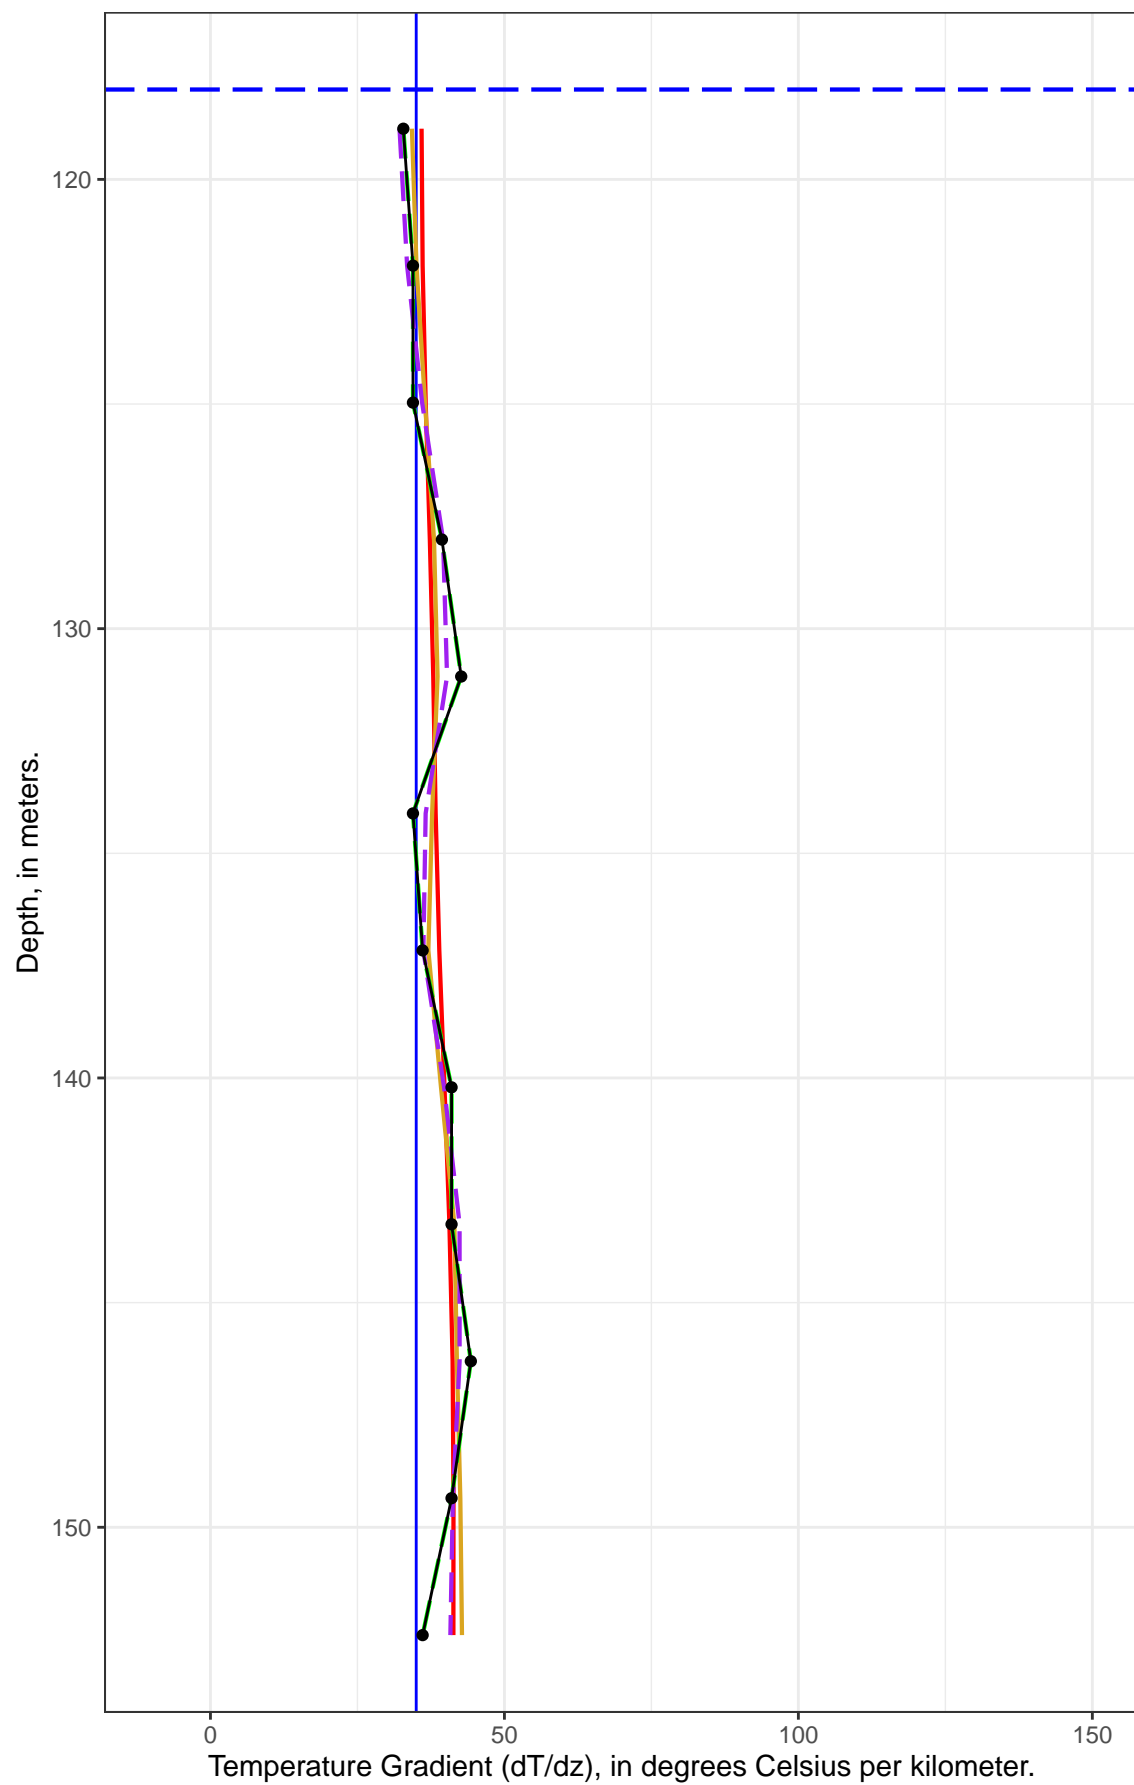

ID: 160 [H-4-80-1239\_KILBOURNE\_HOLE] Second Derivative

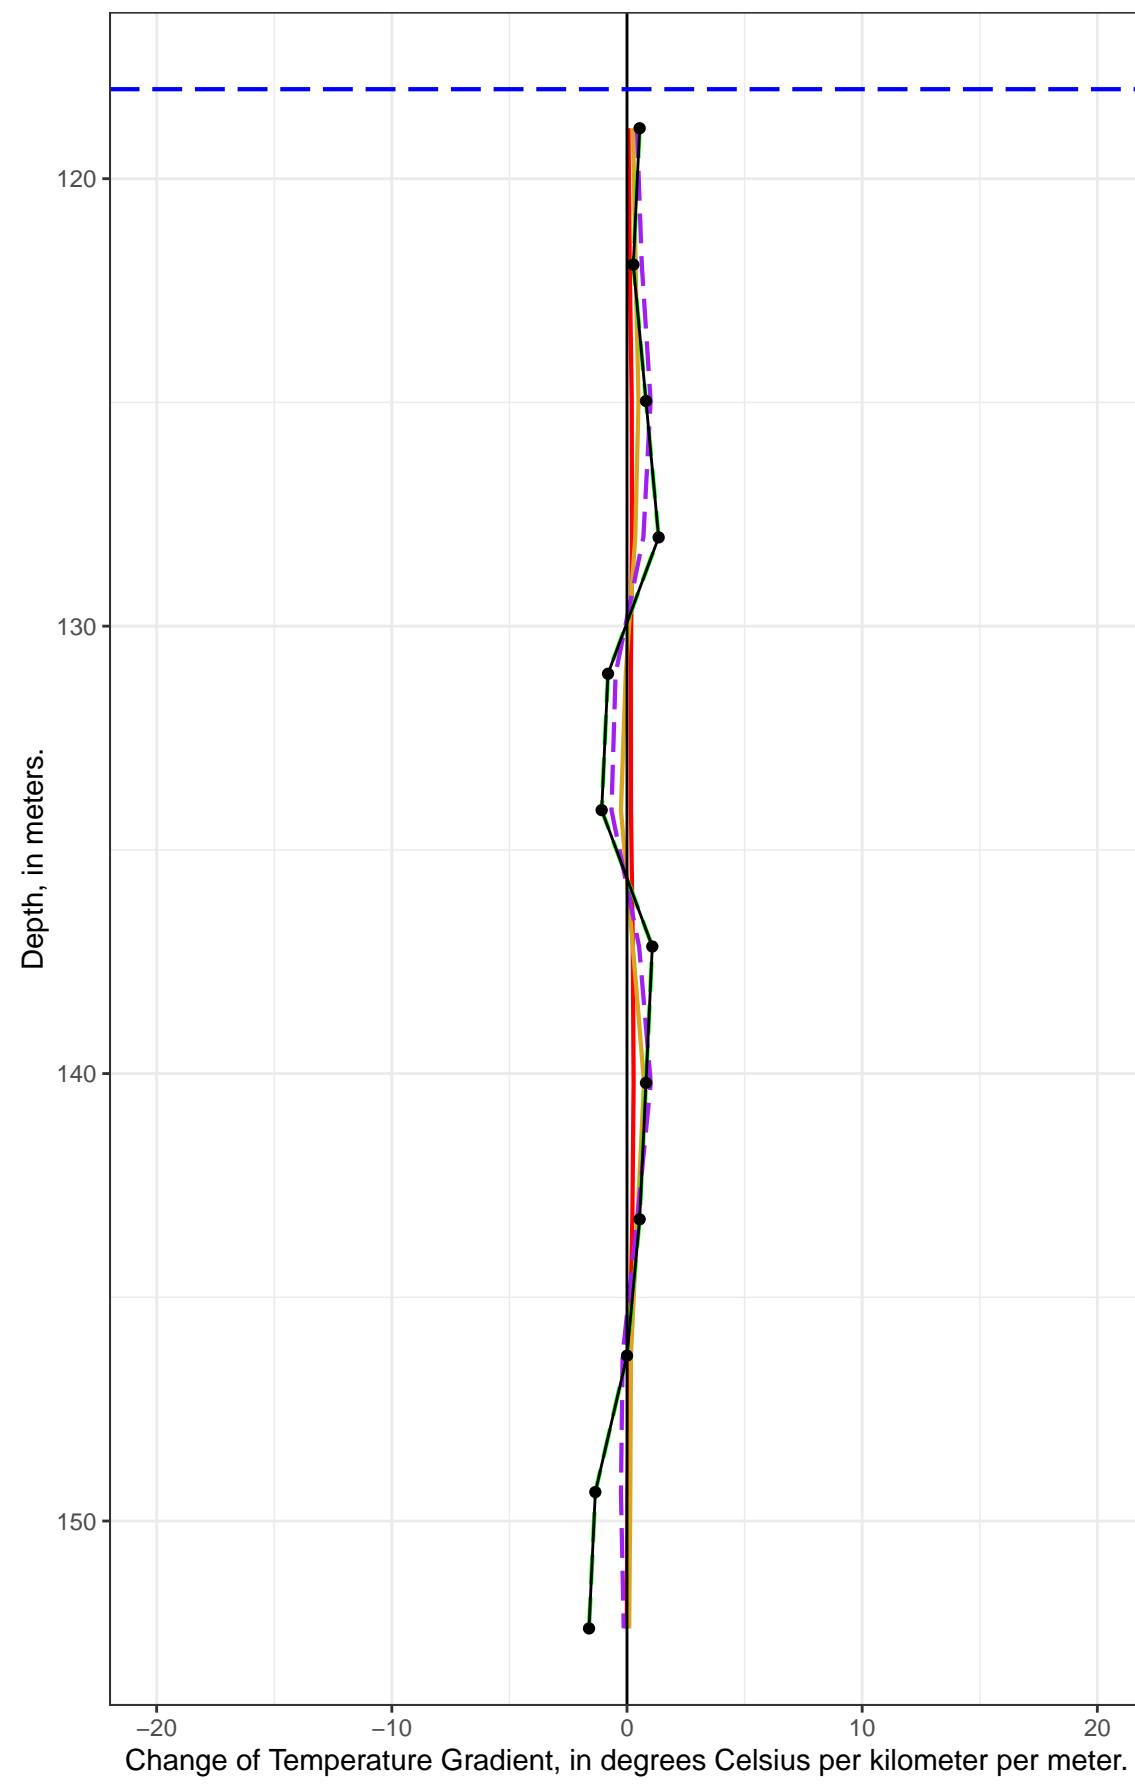

• Data — LOESS (AICC) — LOESS (constant) — LOESS (GCV) — Spline

• Data — LOESS (AICC) — LOESS (constant) — LOESS (GCV) — Spline

• Data — LOESS (AICC) — LOESS (constant) — LOESS (GCV) — Spline

ID: 161 [H-4-80-1242\_KILBOURNE\_HOLE] Smoothed Profile

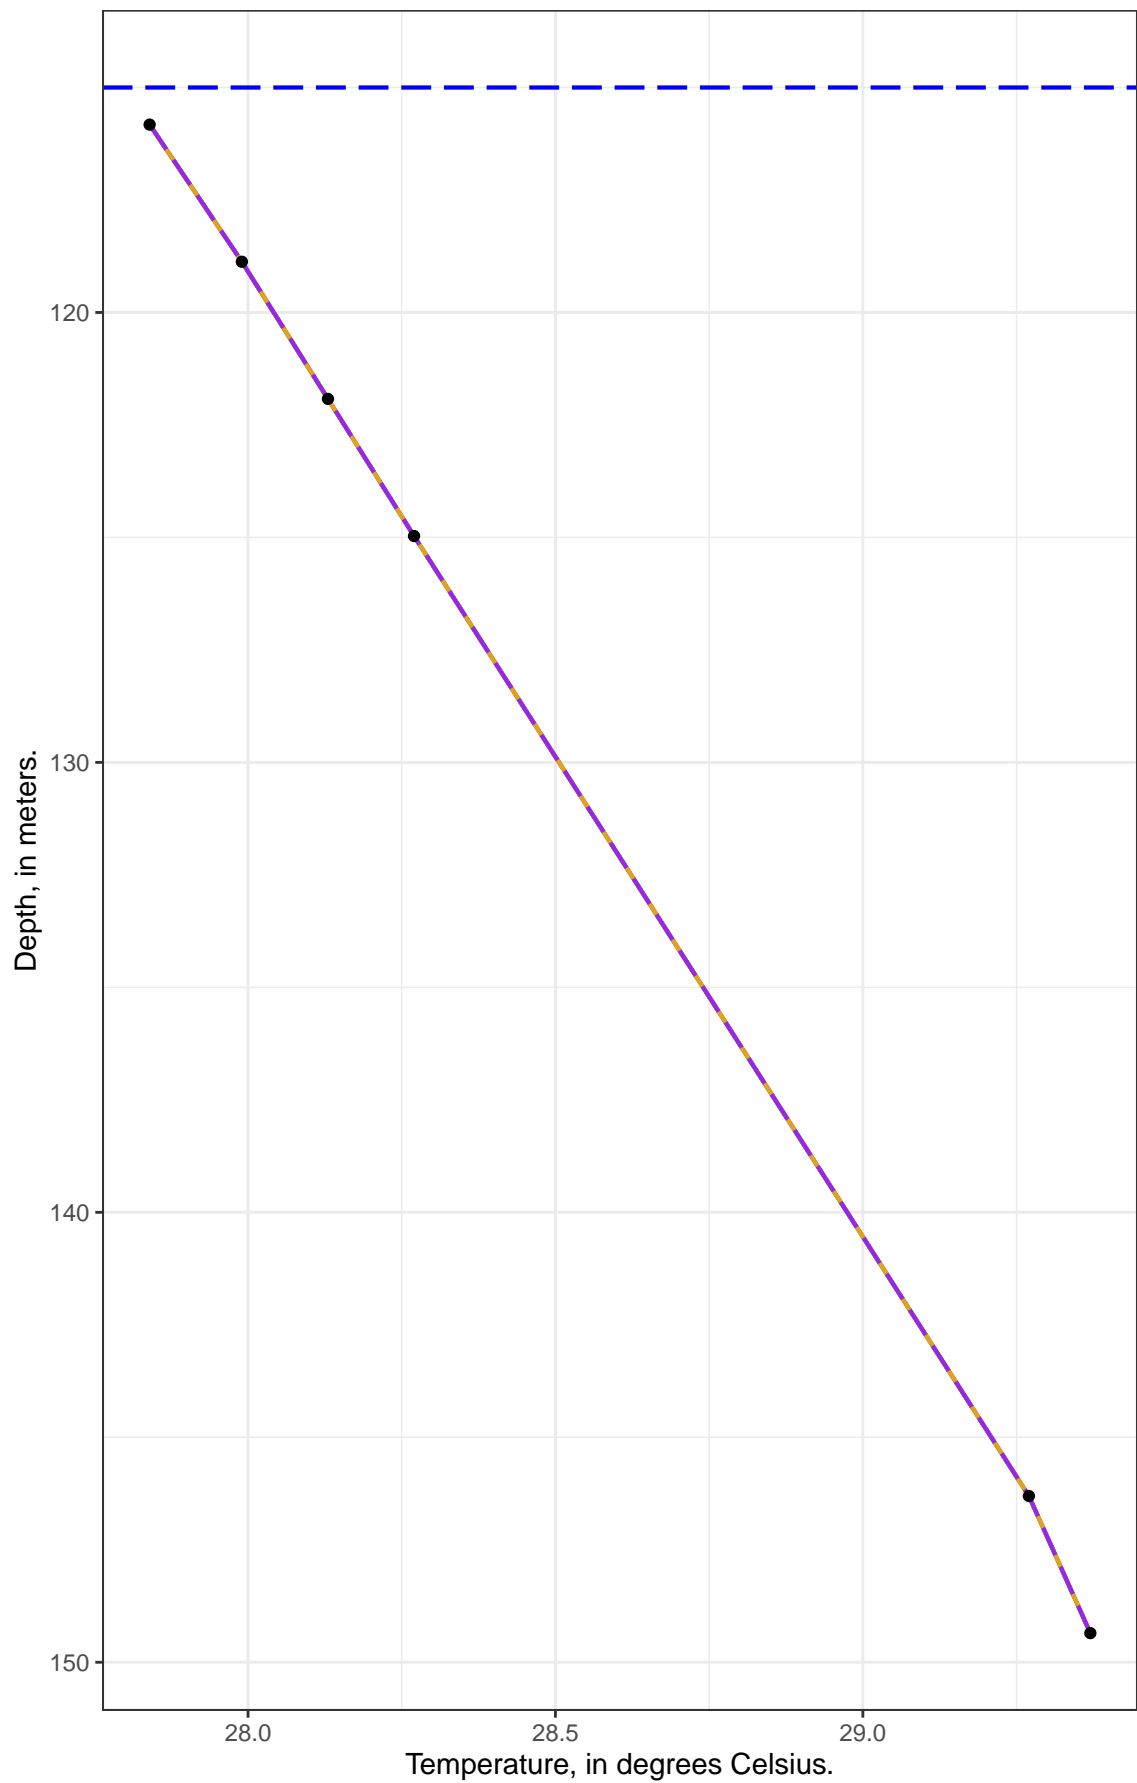

ID: 161 [H-4-80-1242\_KILBOURNE\_HOLE] First Derivative

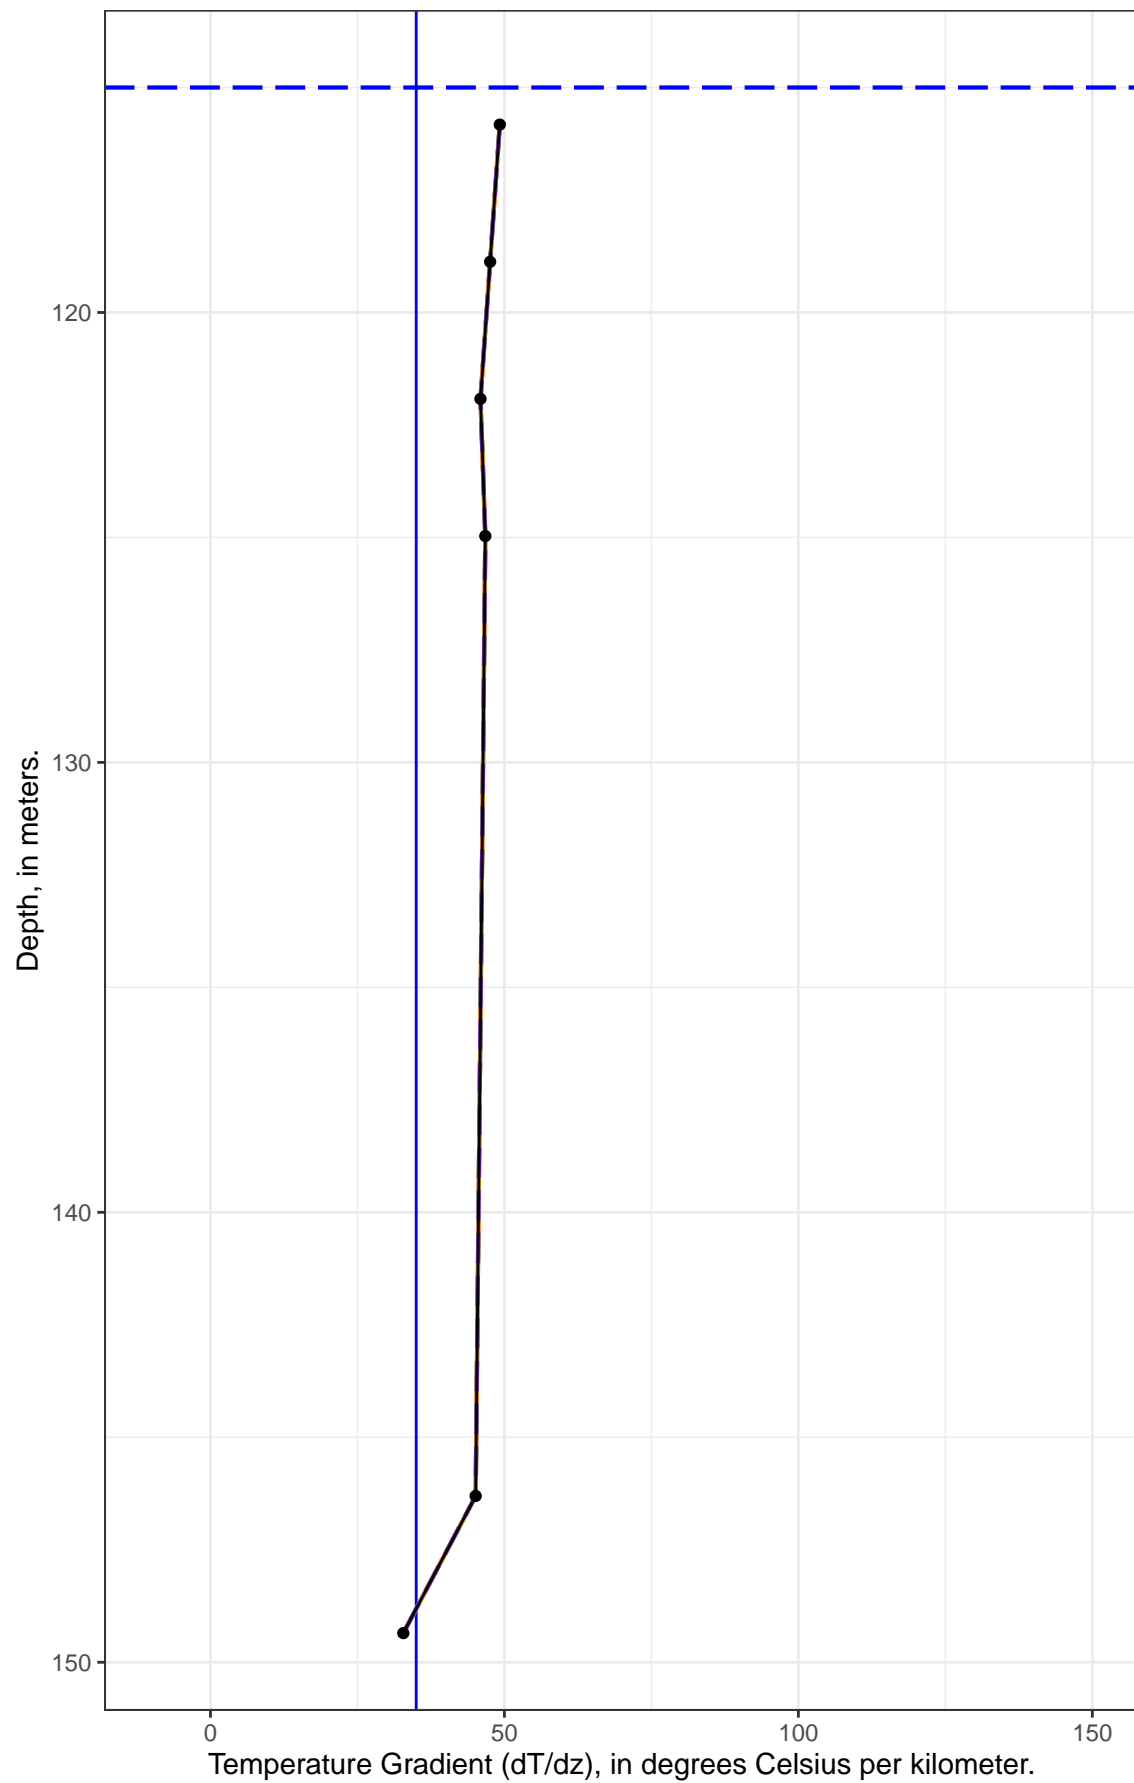

ID: 161 [H-4-80-1242\_KILBOURNE\_HOLE] Second Derivative

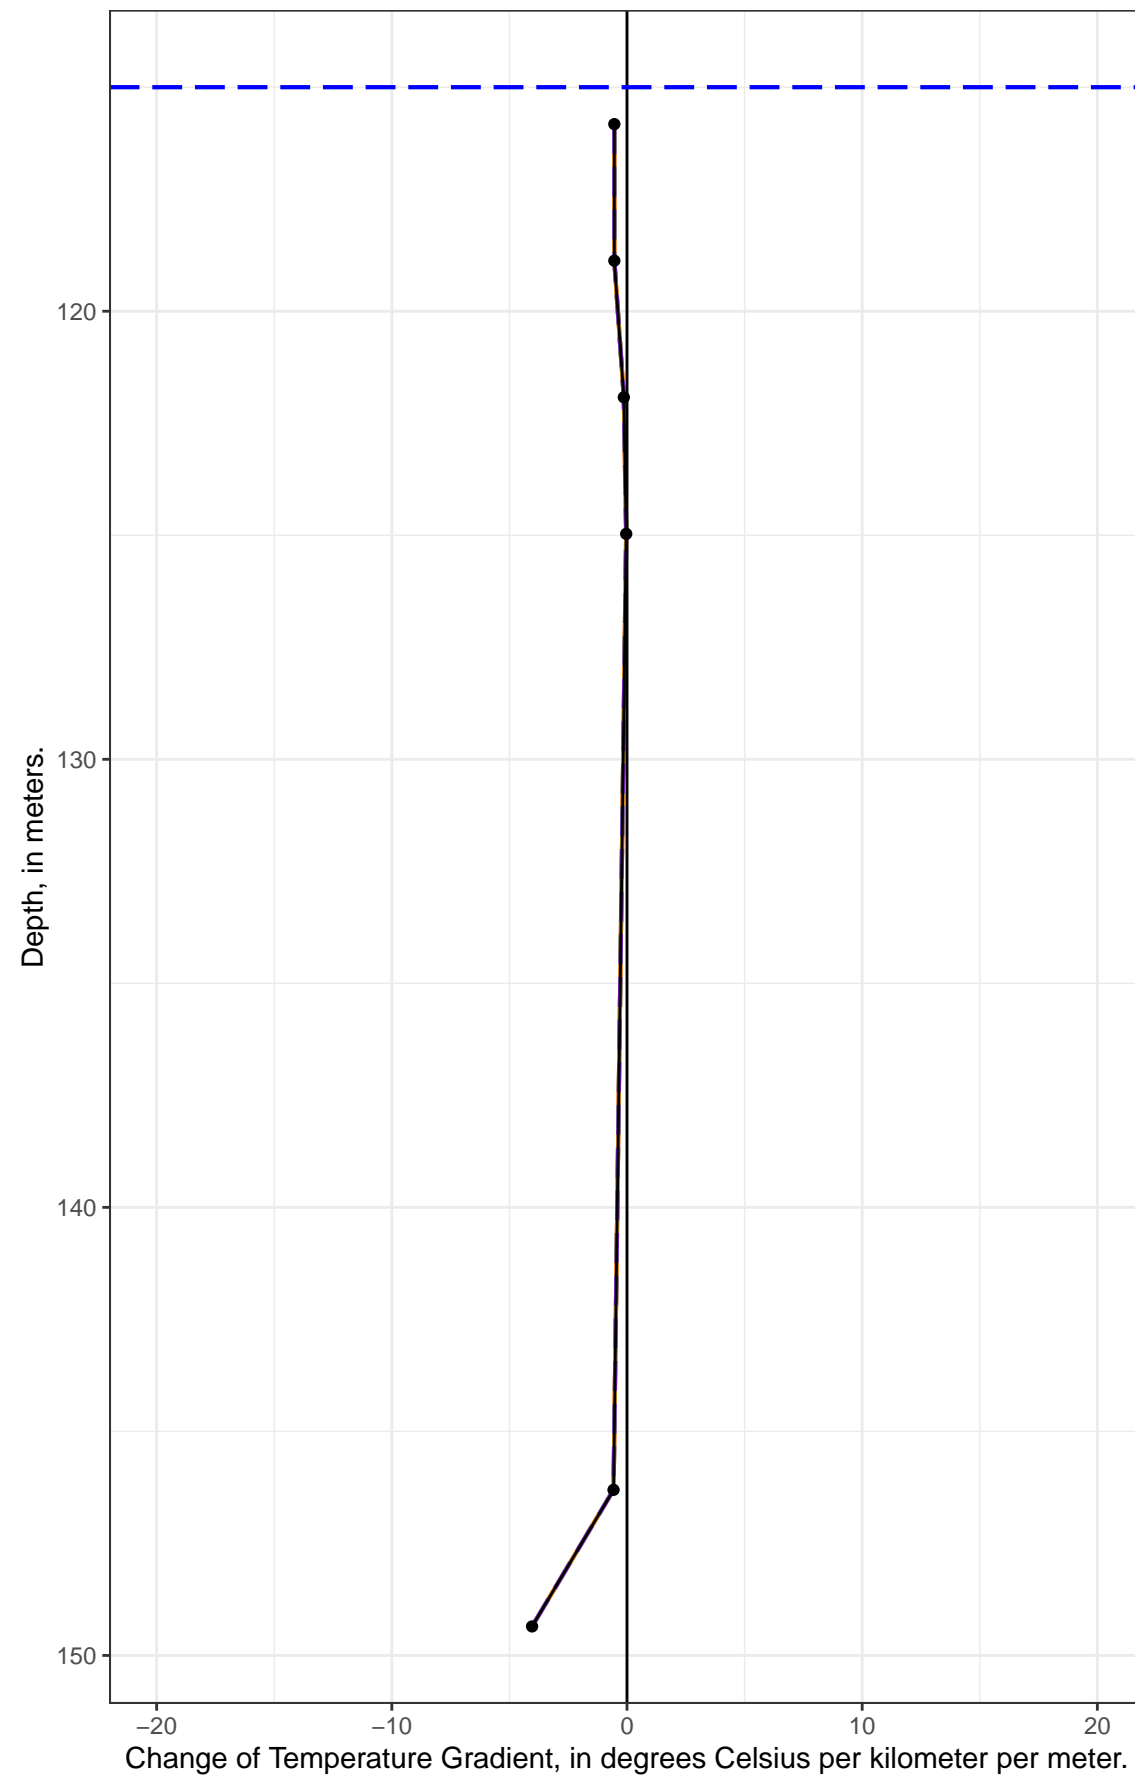

• Data • LOESS (AICC) • LOESS (constant) • LOESS (GCV) • Spline

• Data • LOESS (AICC) • LOESS (constant) • LOESS (GCV) • Spline

• Data • LOESS (AICC) • LOESS (constant) • LOESS (GCV) • Spline



ID: 162 [H-6-78-1000\_KILBOURNE\_HOLE] Smoothed Profile

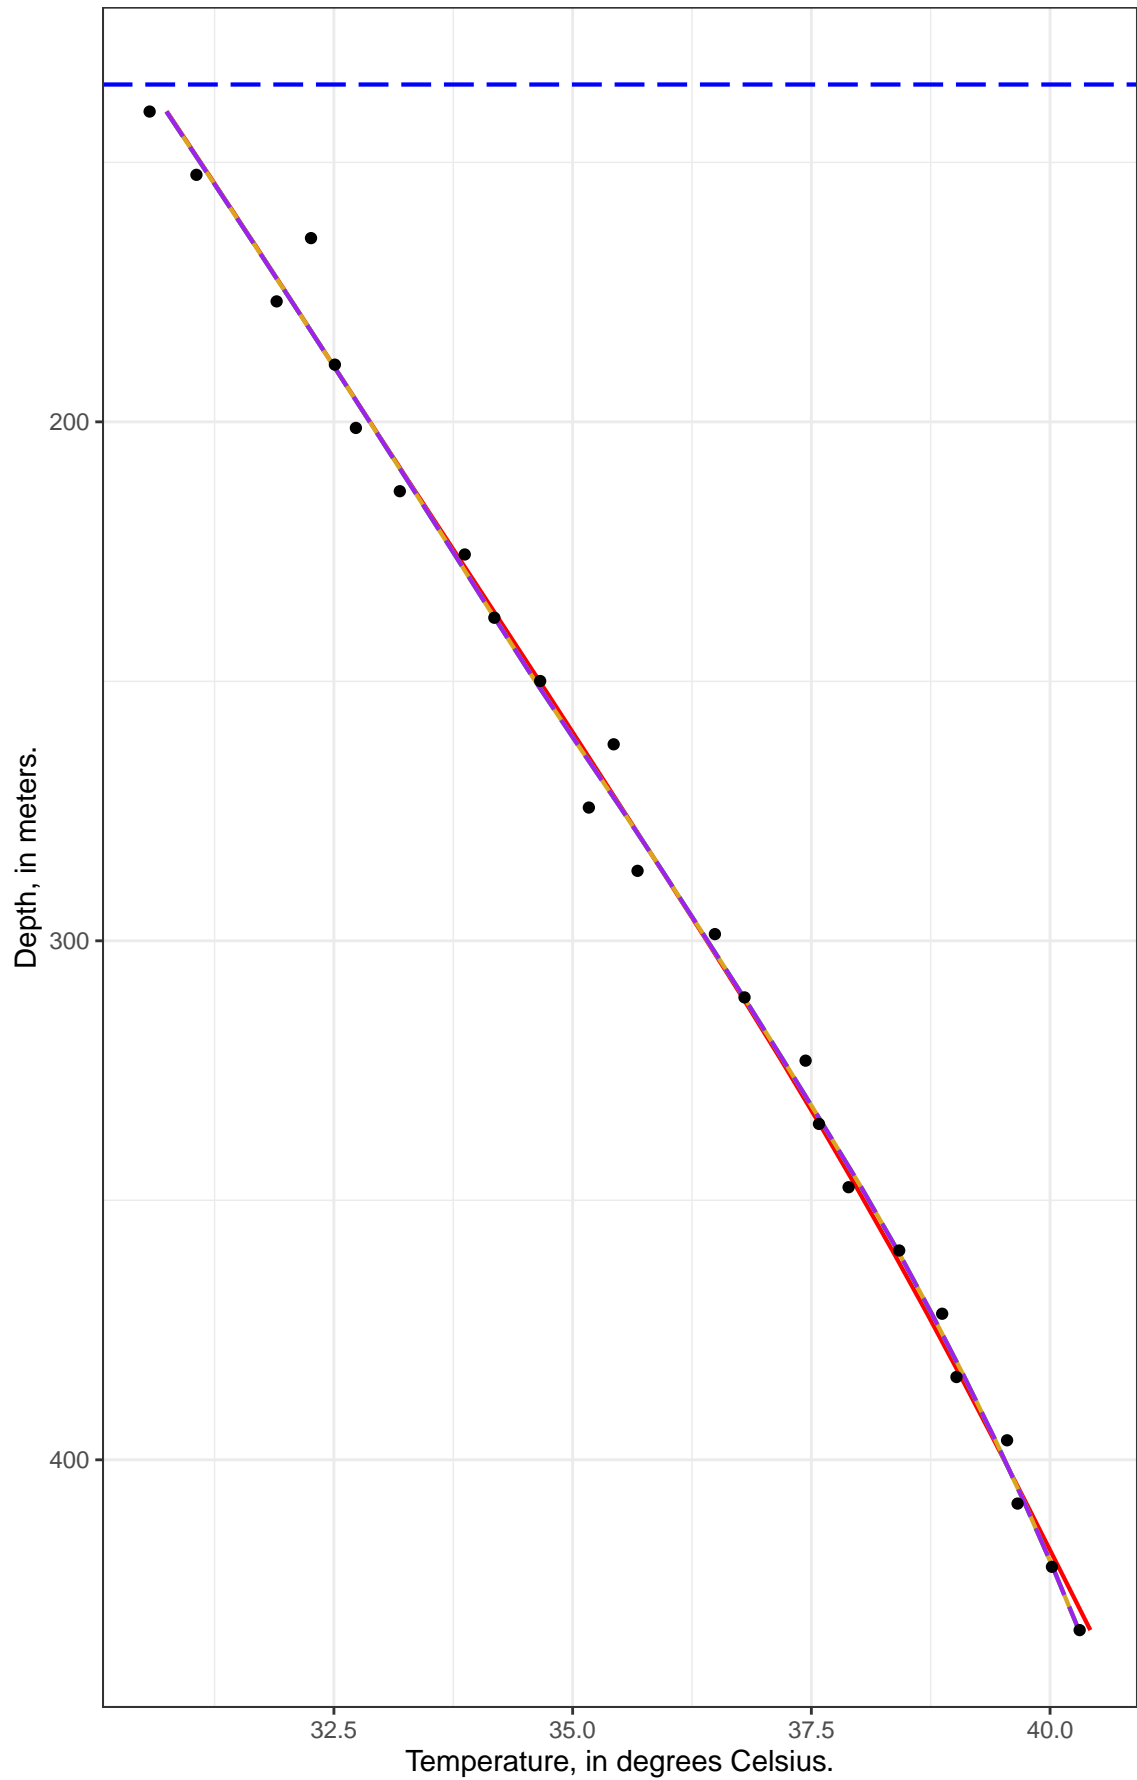

ID: 162 [H-6-78-1000\_KILBOURNE\_HOLE] First Derivative

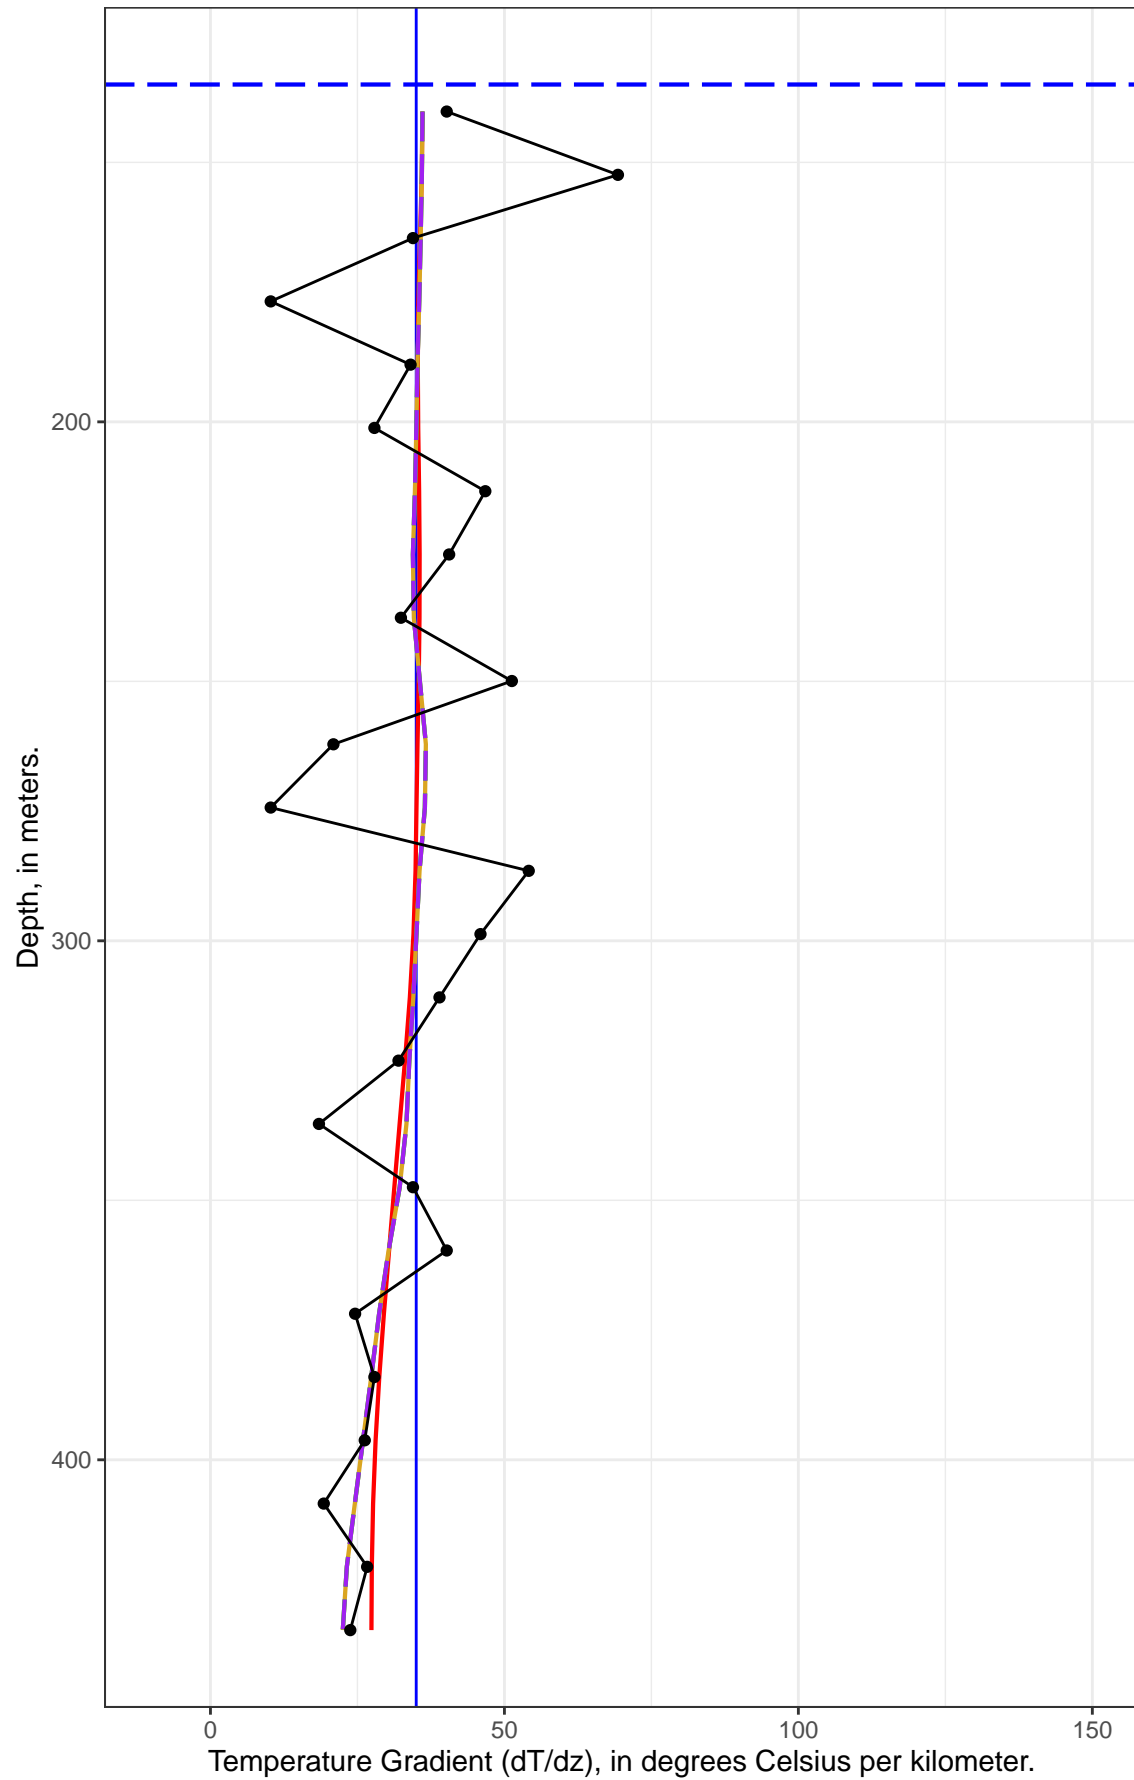

ID: 162 [H-6-78-1000\_KILBOURNE\_HOLE] Second Derivative

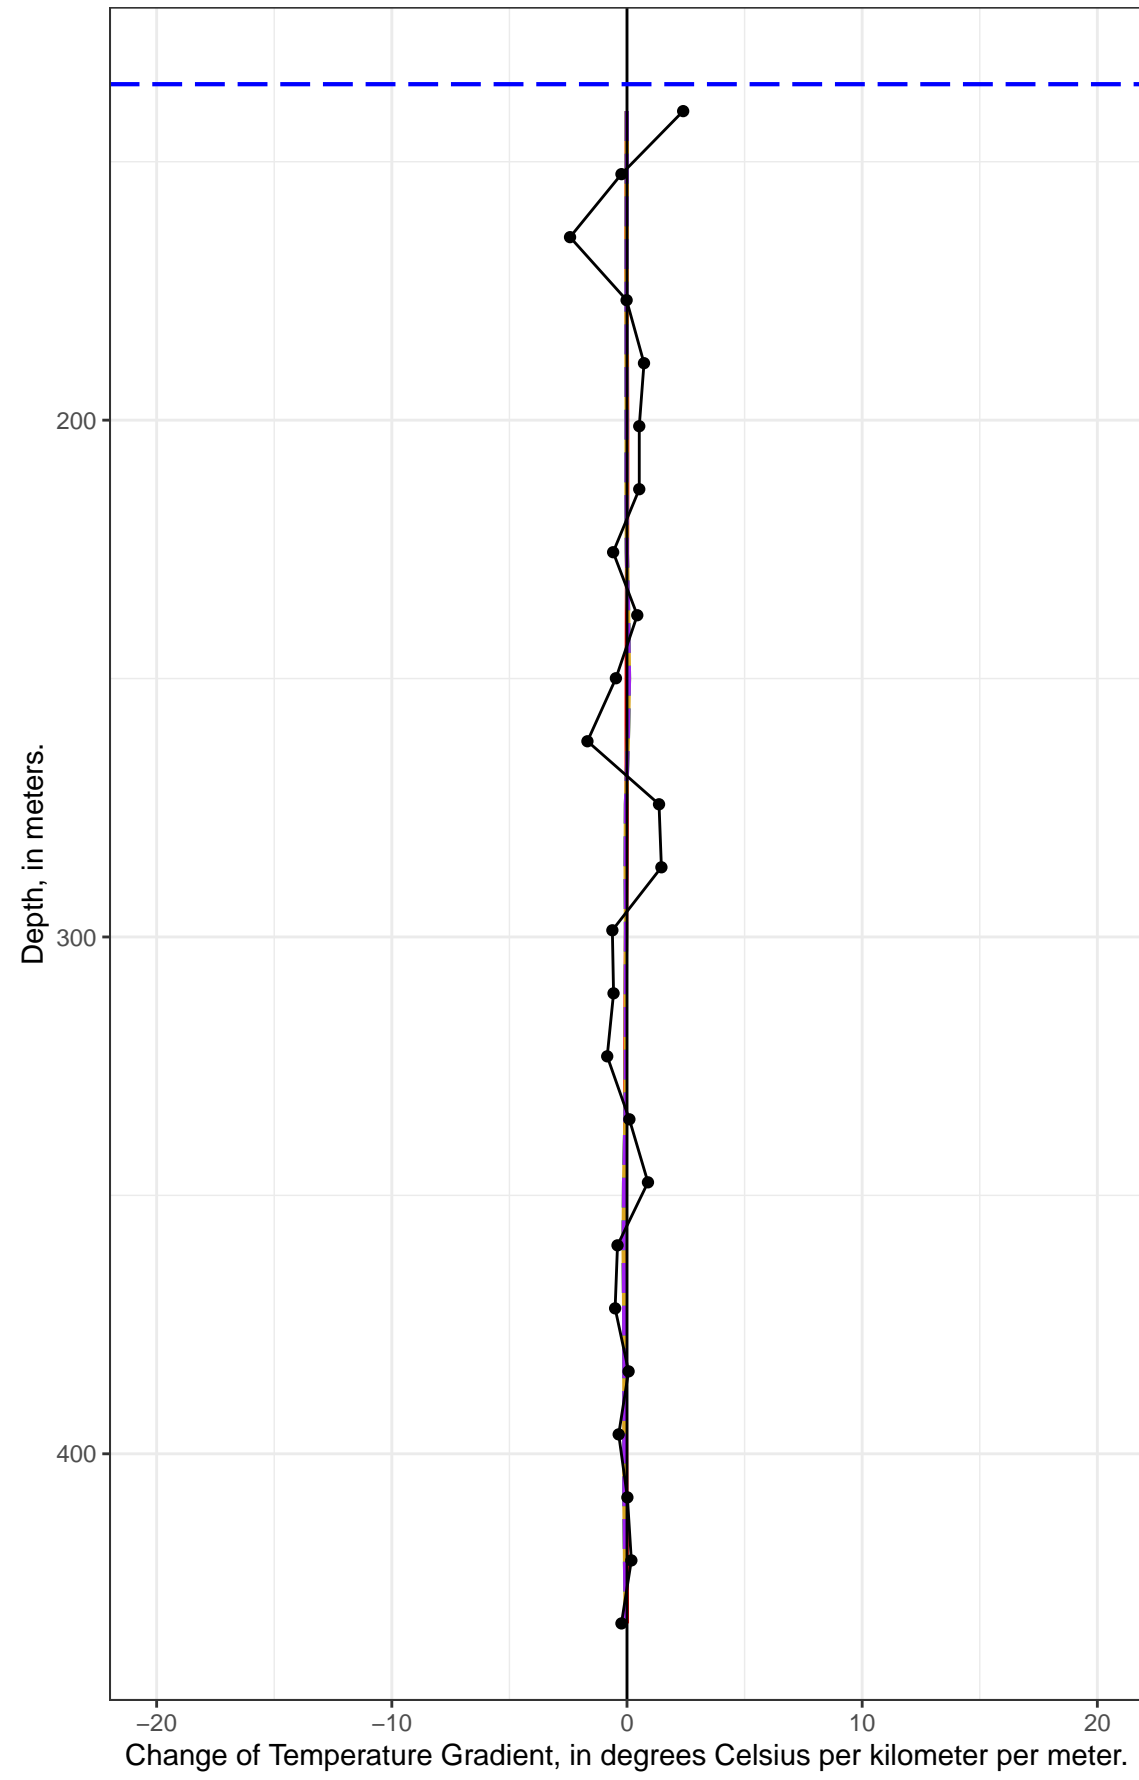

• Data — LOESS (AICC) — LOESS (constant) — LOESS (GCV) — Spline

• Data — LOESS (AICC) — LOESS (constant) — LOESS (GCV) — Spline

• Data — LOESS (AICC) — LOESS (constant) — LOESS (GCV) — Spline

ID: 163 [H-6-78-1010\_KILBOURNE\_HOLE] Smoothed Profile

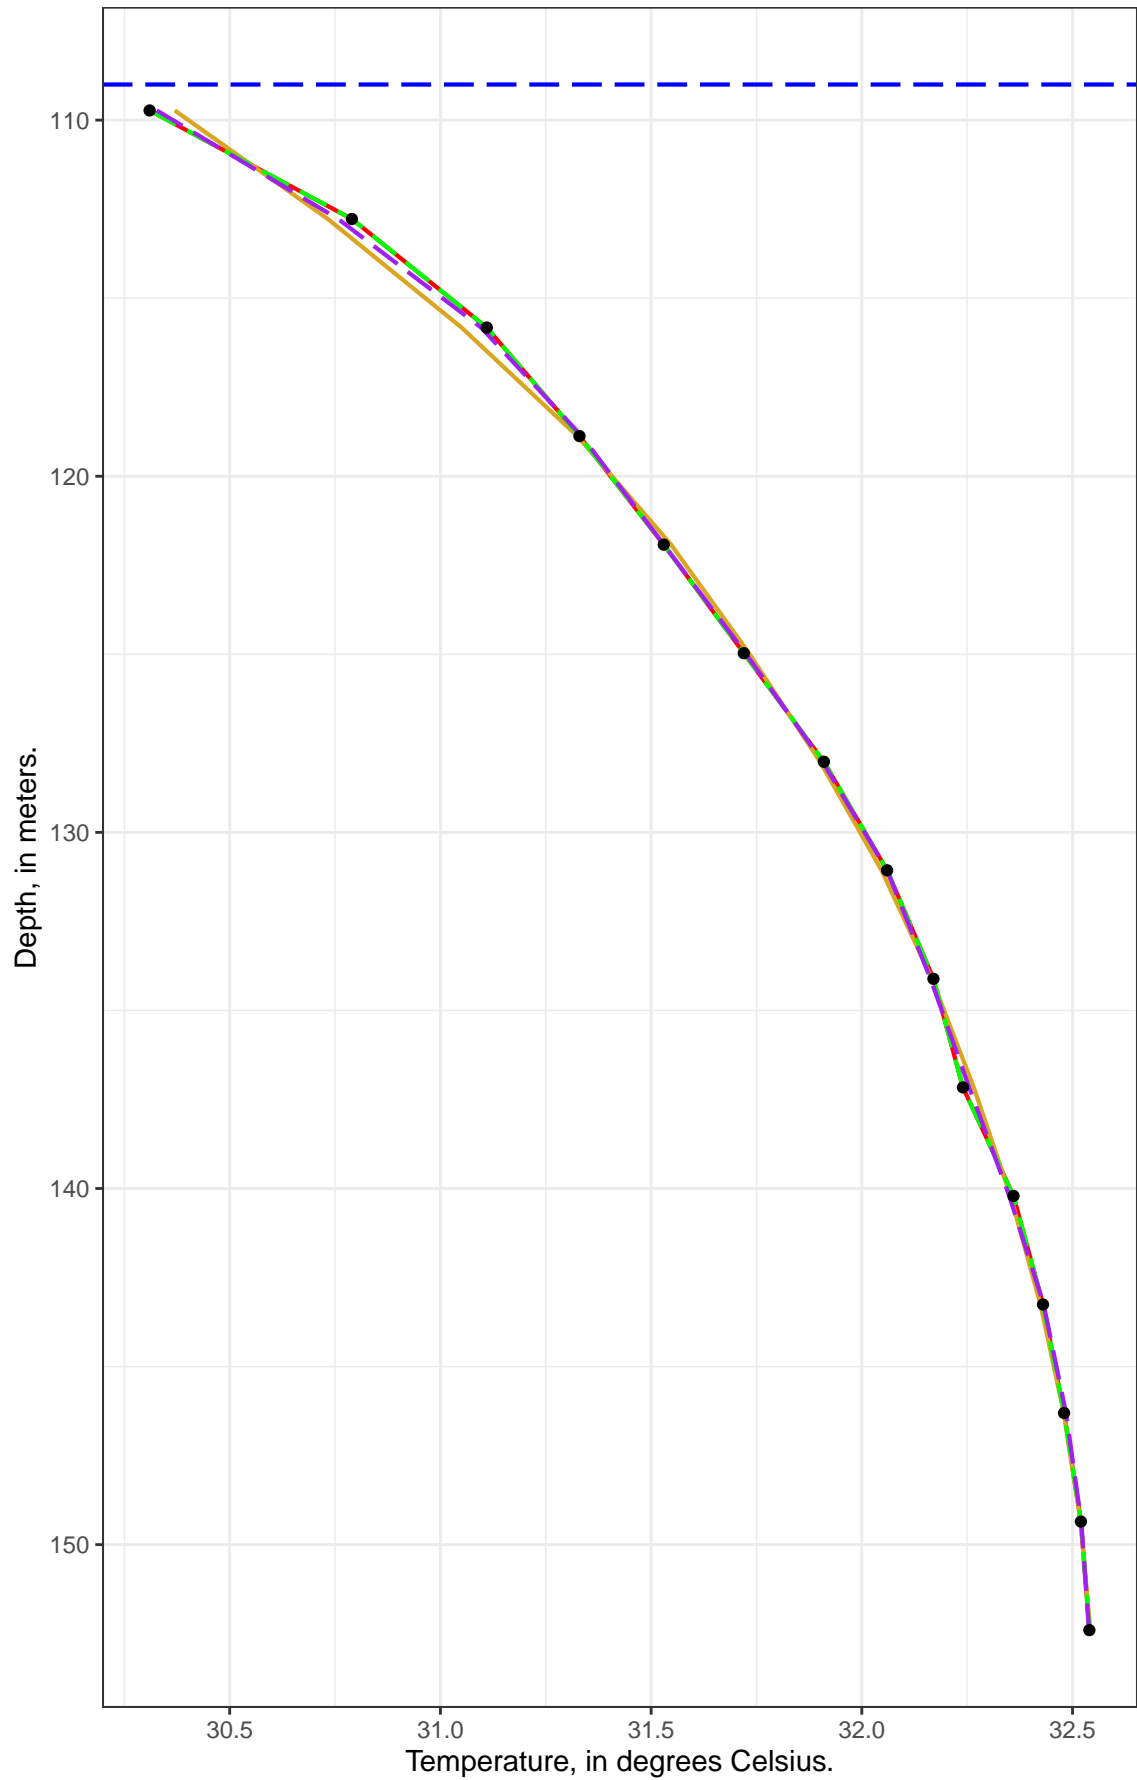

ID: 163 [H-6-78-1010\_KILBOURNE\_HOLE] First Derivative

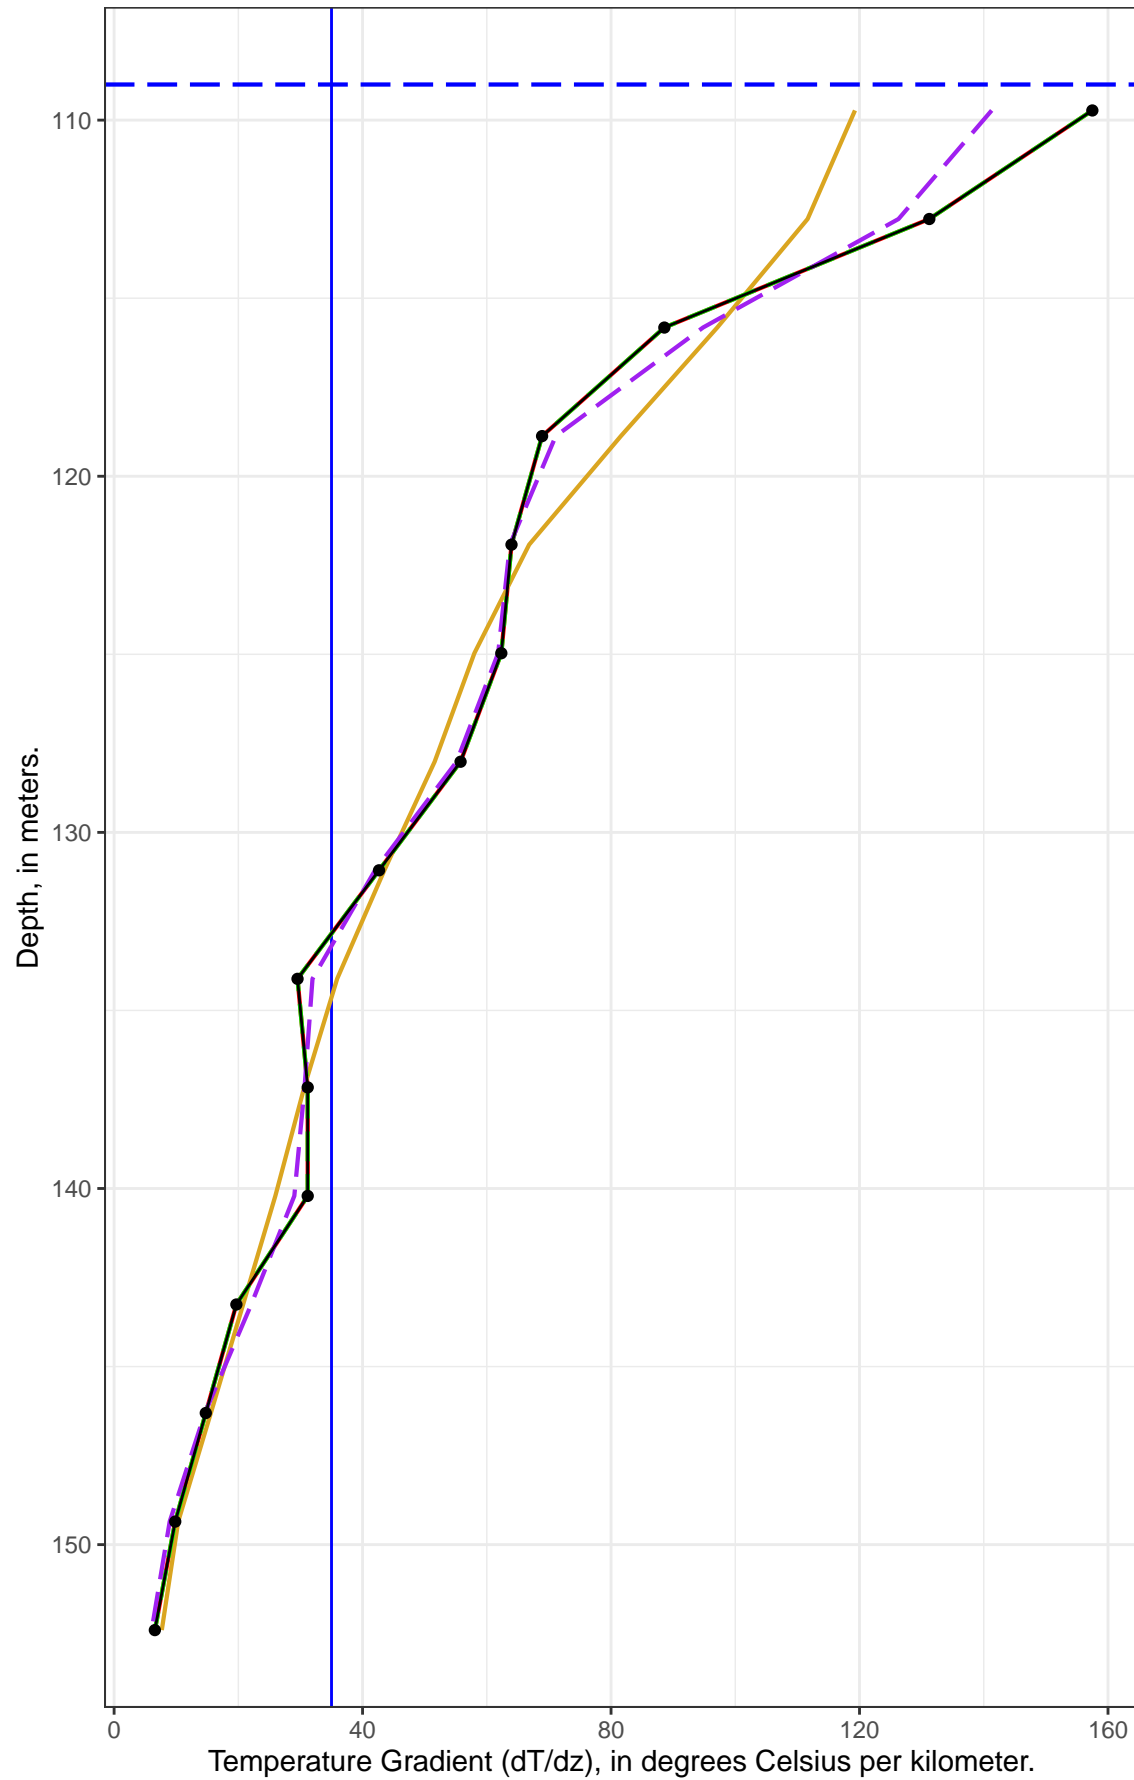

ID: 163 [H-6-78-1010\_KILBOURNE\_HOLE] Second Derivative

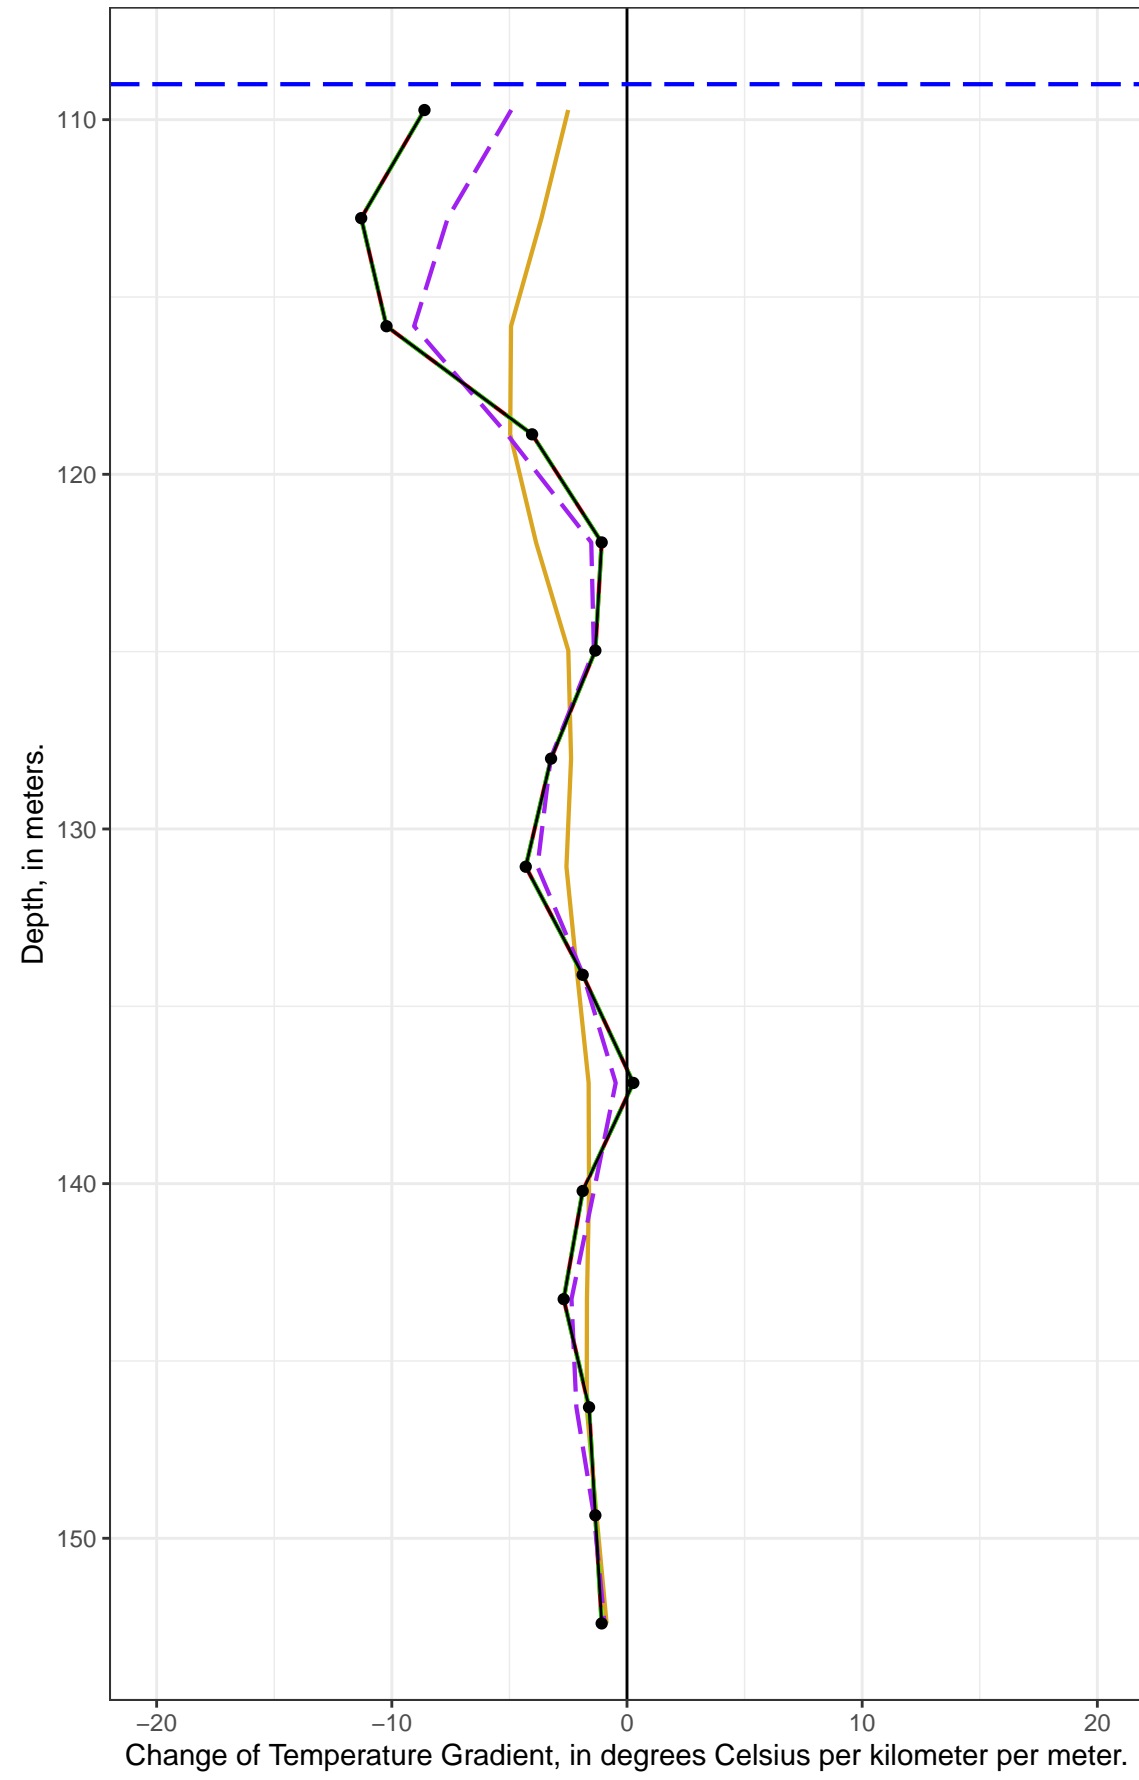

• Data — LOESS (AICC) — LOESS (constant) — LOESS (GCV) — Spline

• Data — LOESS (AICC) — LOESS (constant) — LOESS (GCV) — Spline

• Data — LOESS (AICC) — LOESS (constant) — LOESS (GCV) — Spline

ID: 164 [H-6-78-1013\_KILBOURNE\_HOLE] Smoothed Profile

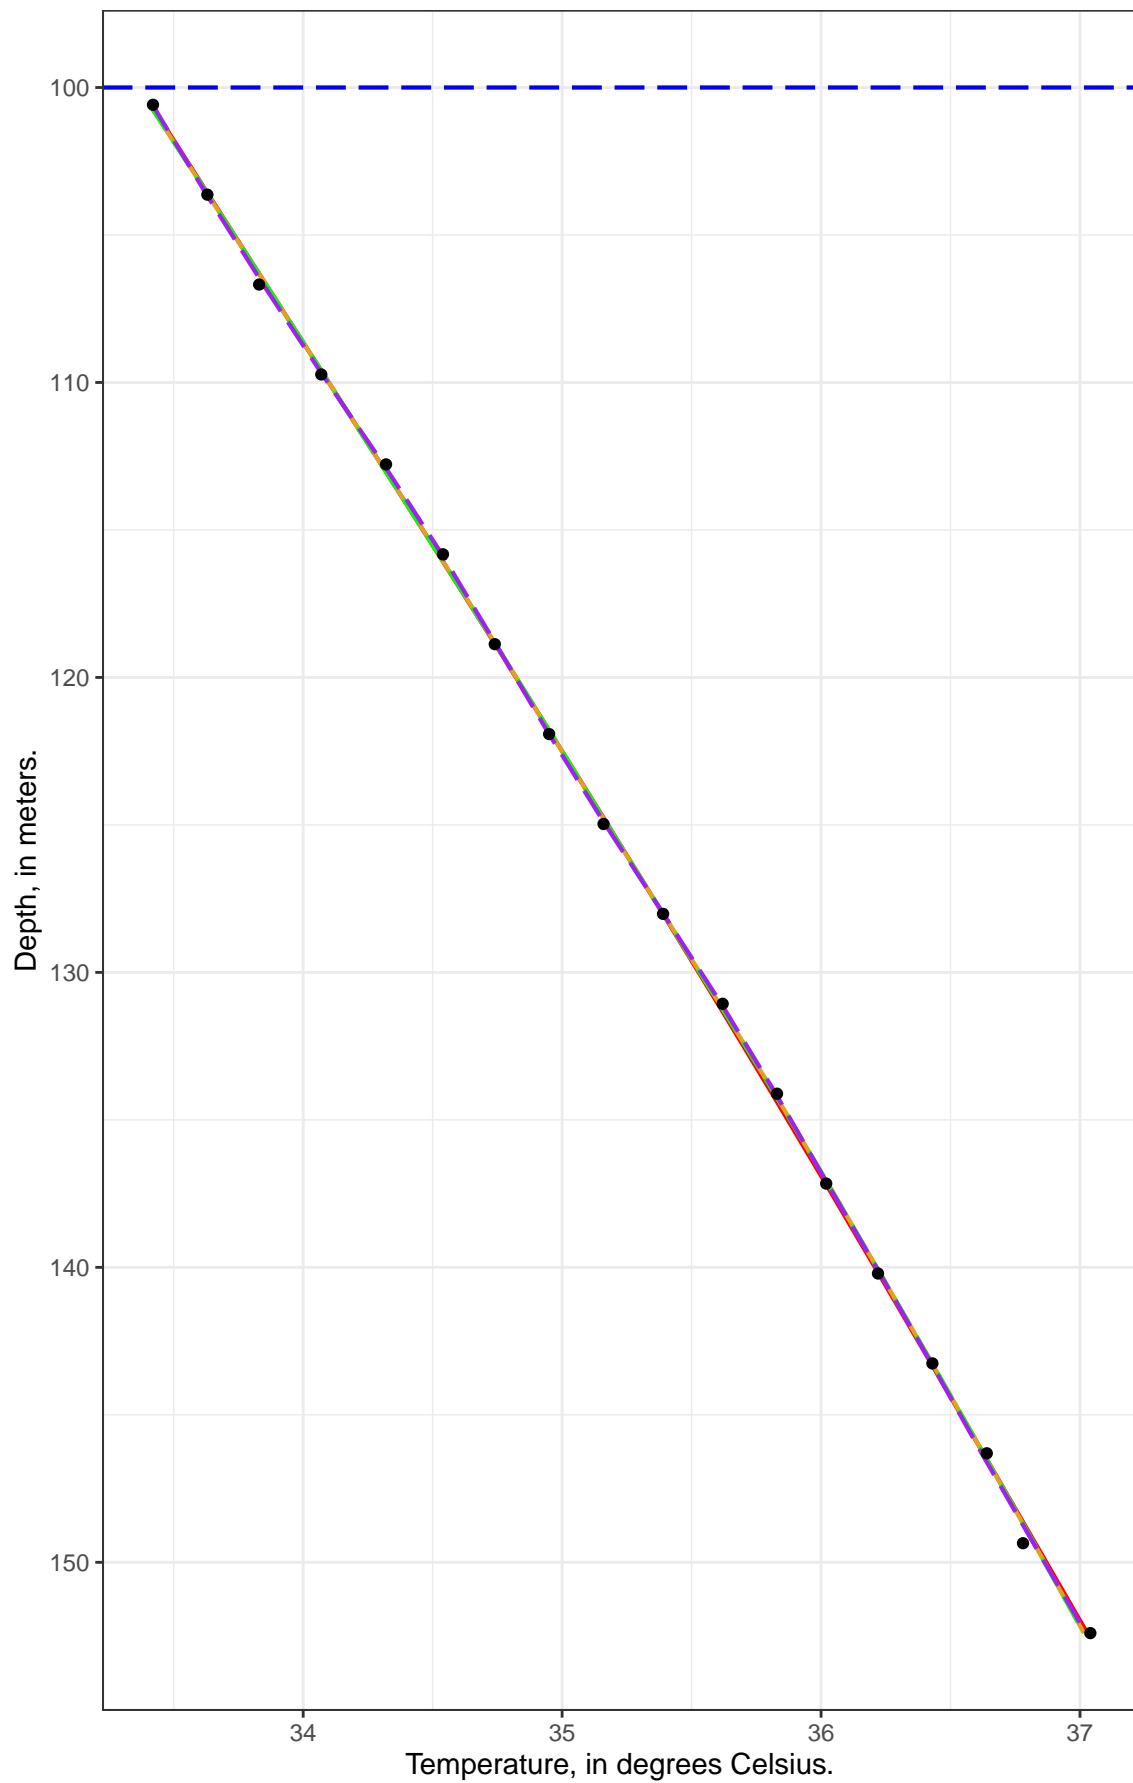

ID: 164 [H-6-78-1013\_KILBOURNE\_HOLE] First Derivative

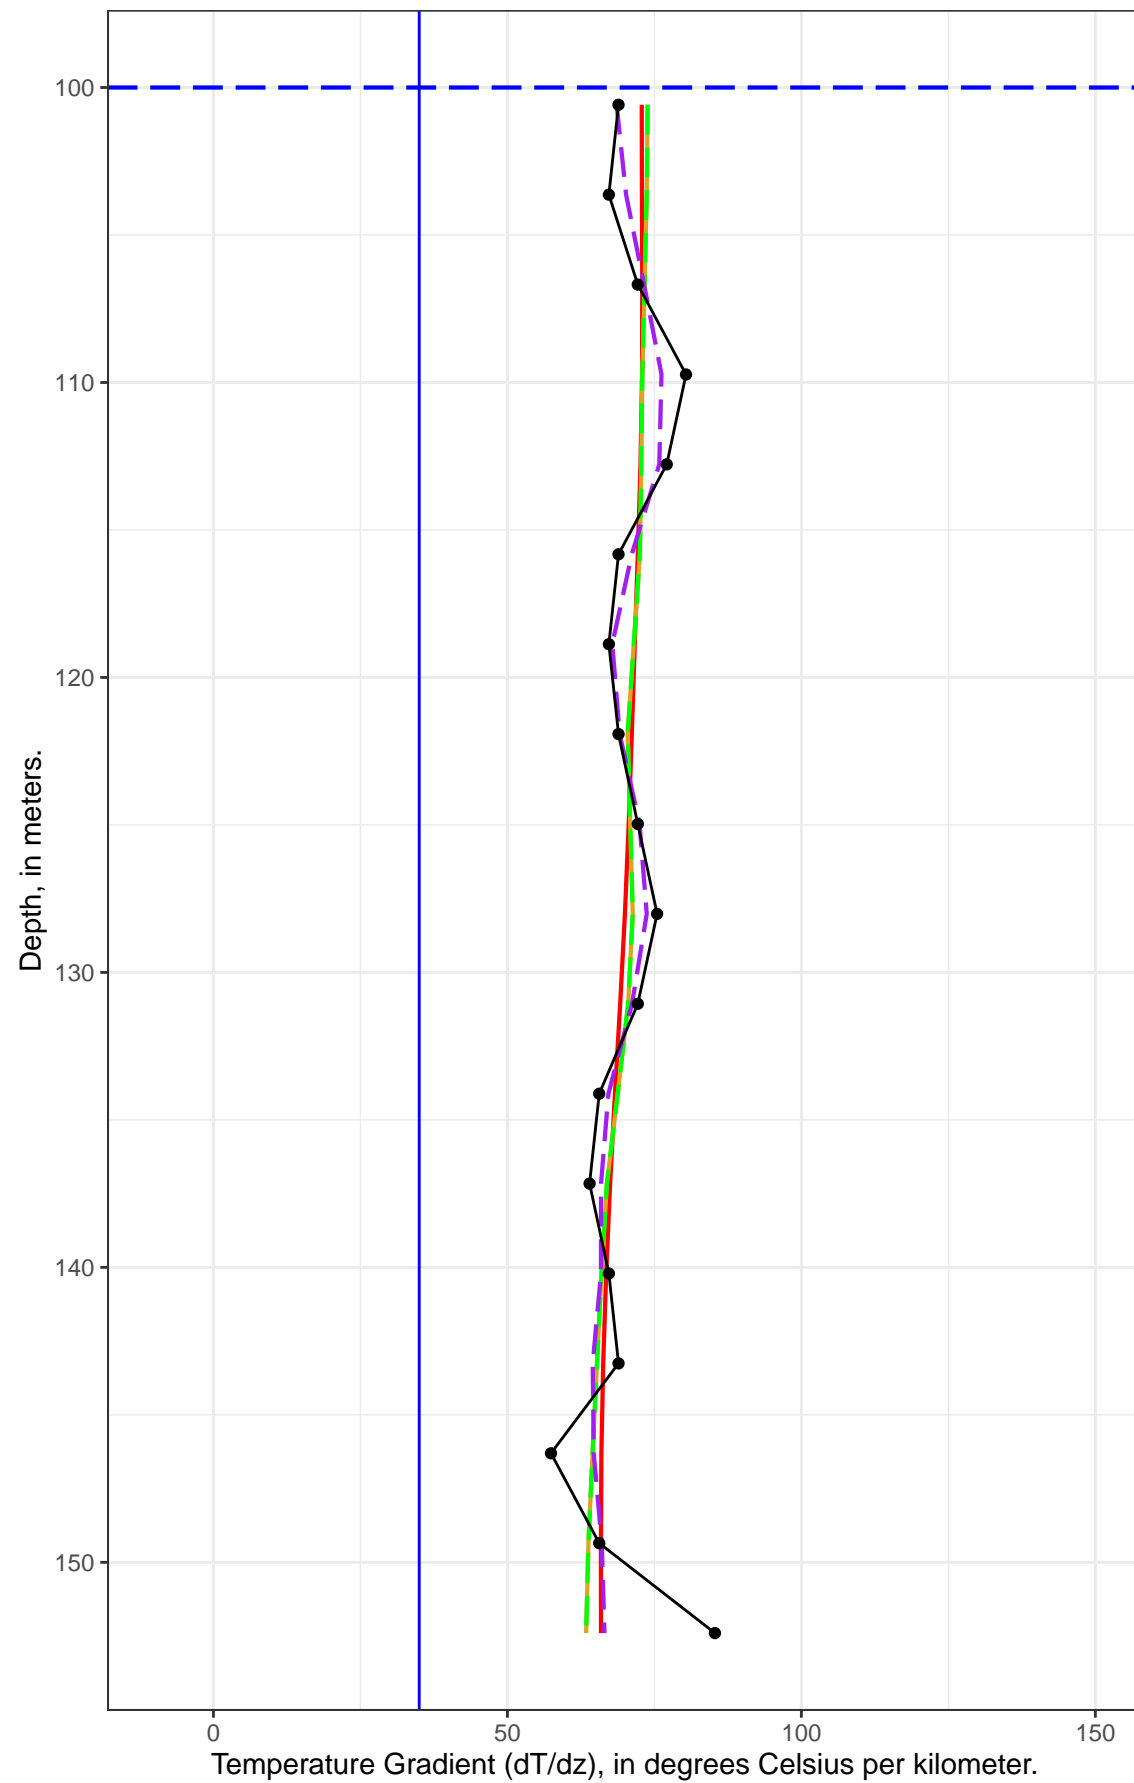

ID: 164 [H-6-78-1013\_KILBOURNE\_HOLE] Second Derivative

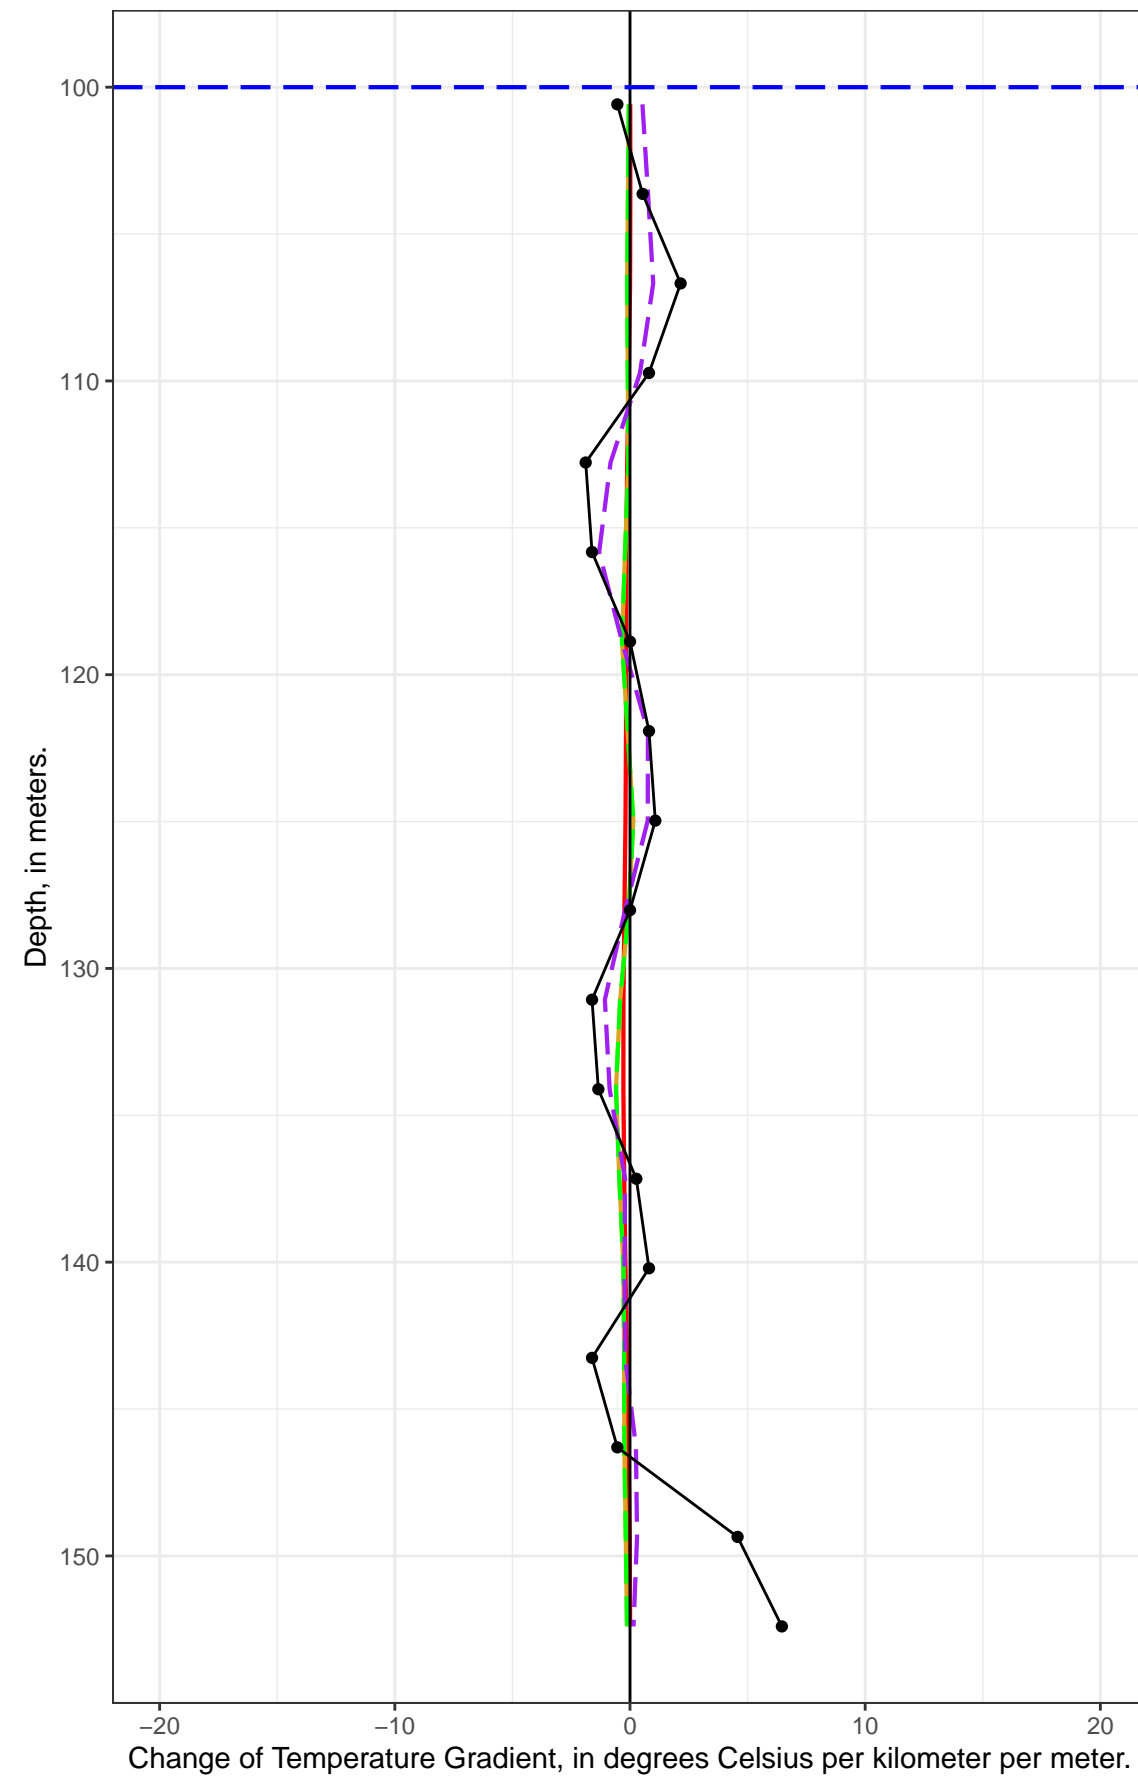

• Data — LOESS (AICC) — LOESS (constant) — LOESS (GCV) — Spline

• Data — LOESS (AICC) — LOESS (constant) — LOESS (GCV) — Spline

• Data — LOESS (AICC) — LOESS (constant) — LOESS (GCV) — Spline

ID: 165 [H-6-78-1014\_KILBOURNE\_HOLE] Smoothed Profile

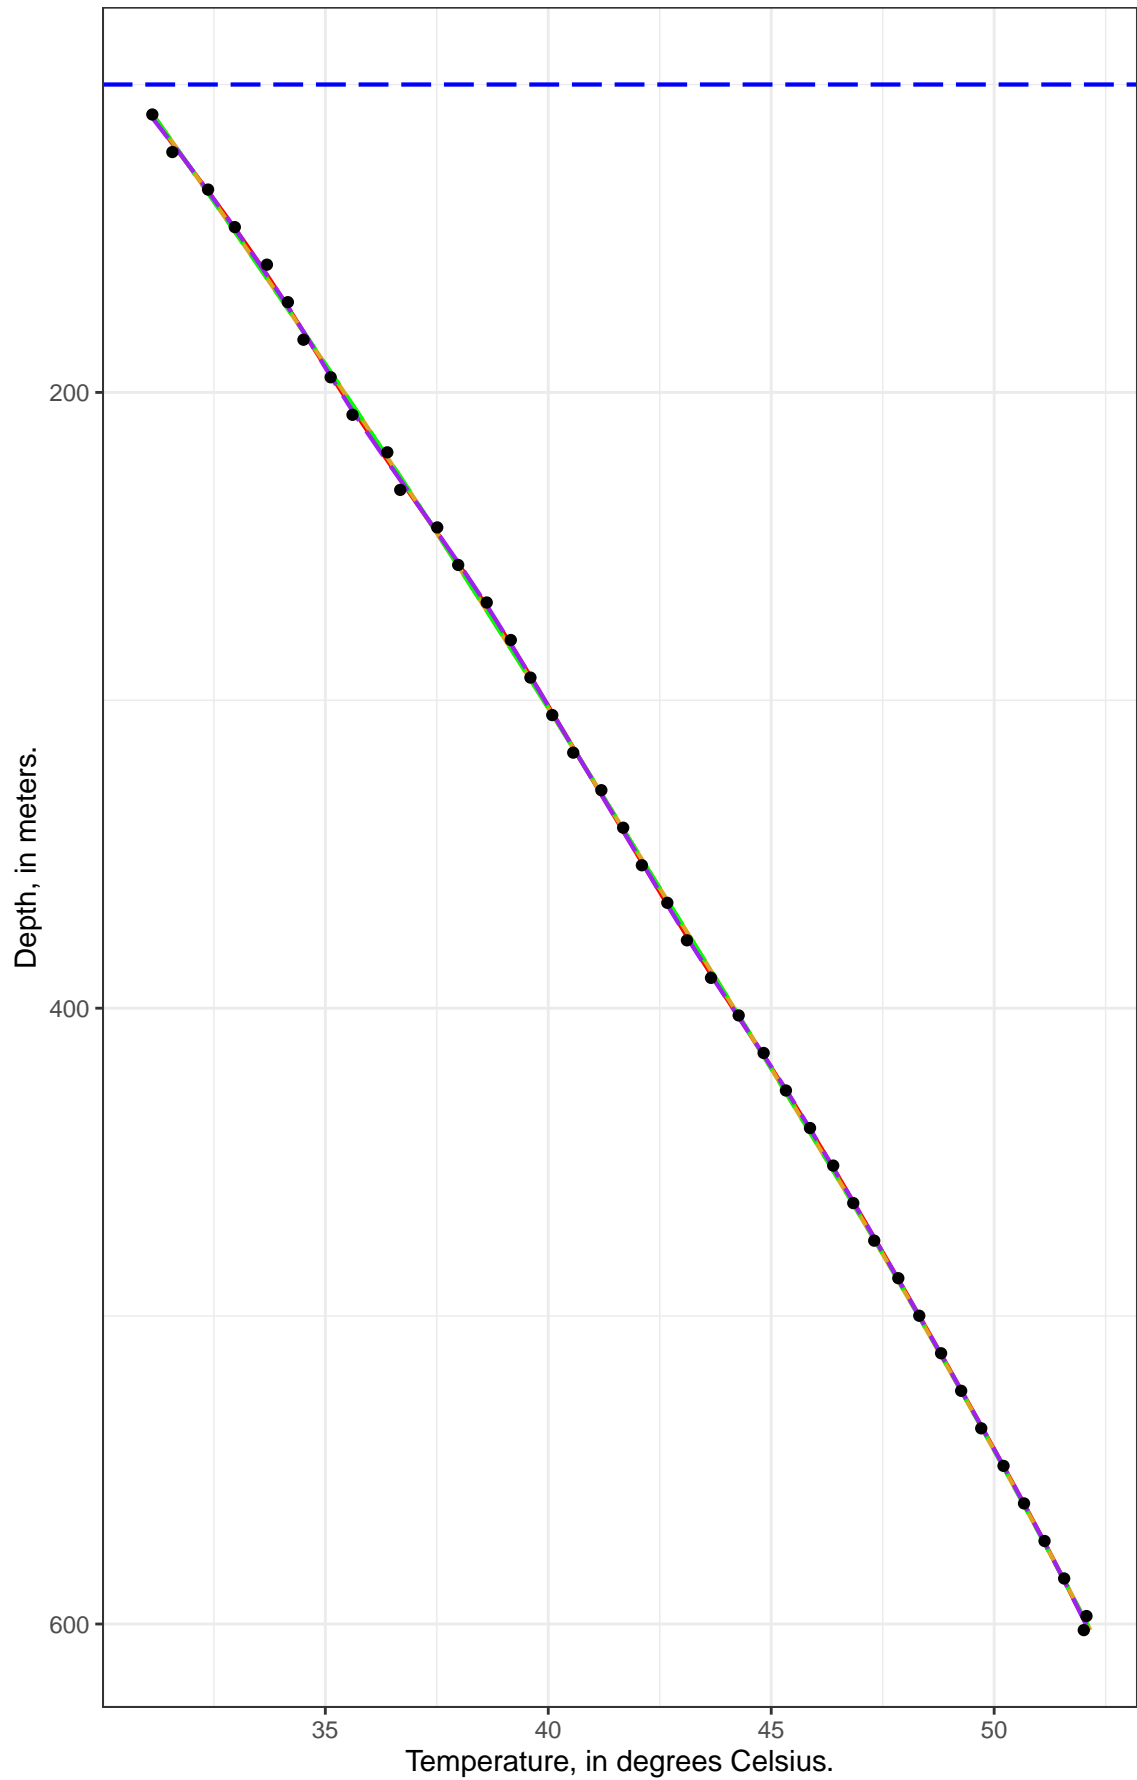

ID: 165 [H-6-78-1014\_KILBOURNE\_HOLE] First Derivative

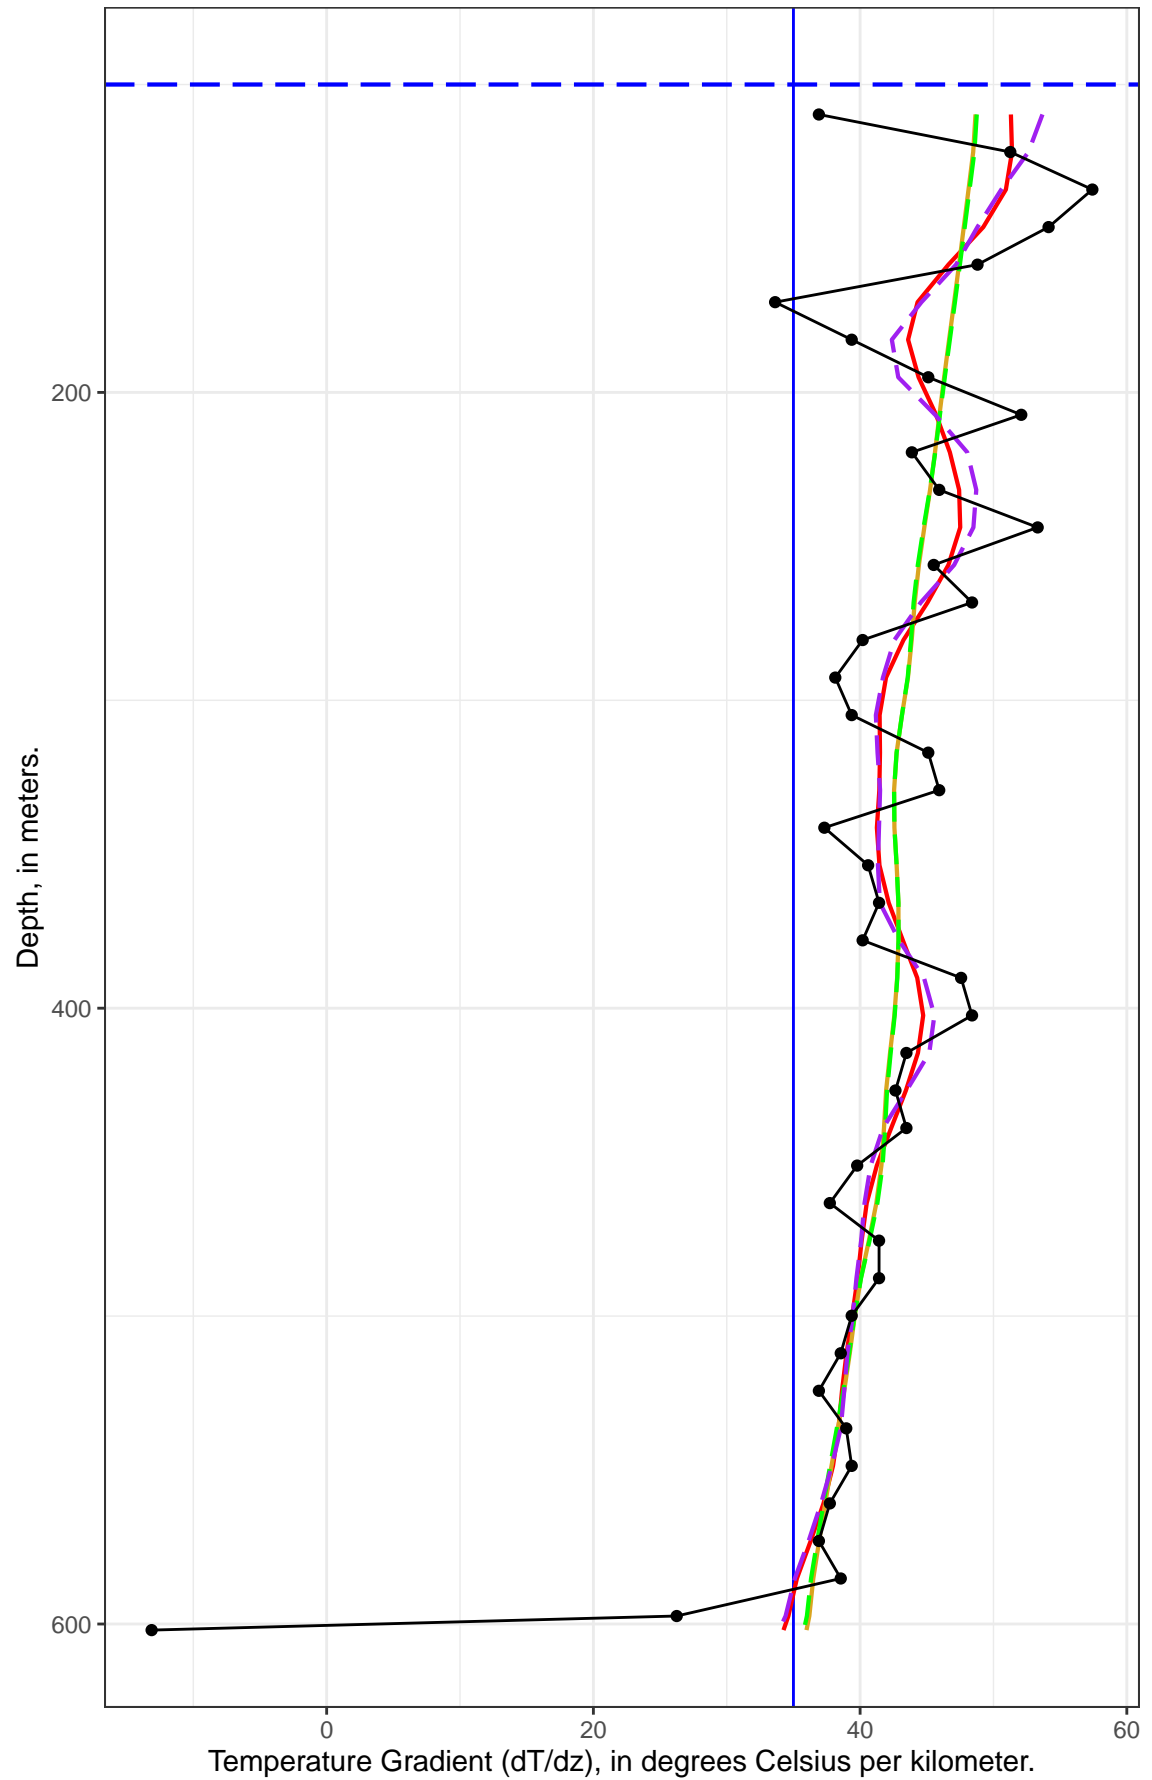

ID: 165 [H-6-78-1014\_KILBOURNE\_HOLE] Second Derivative

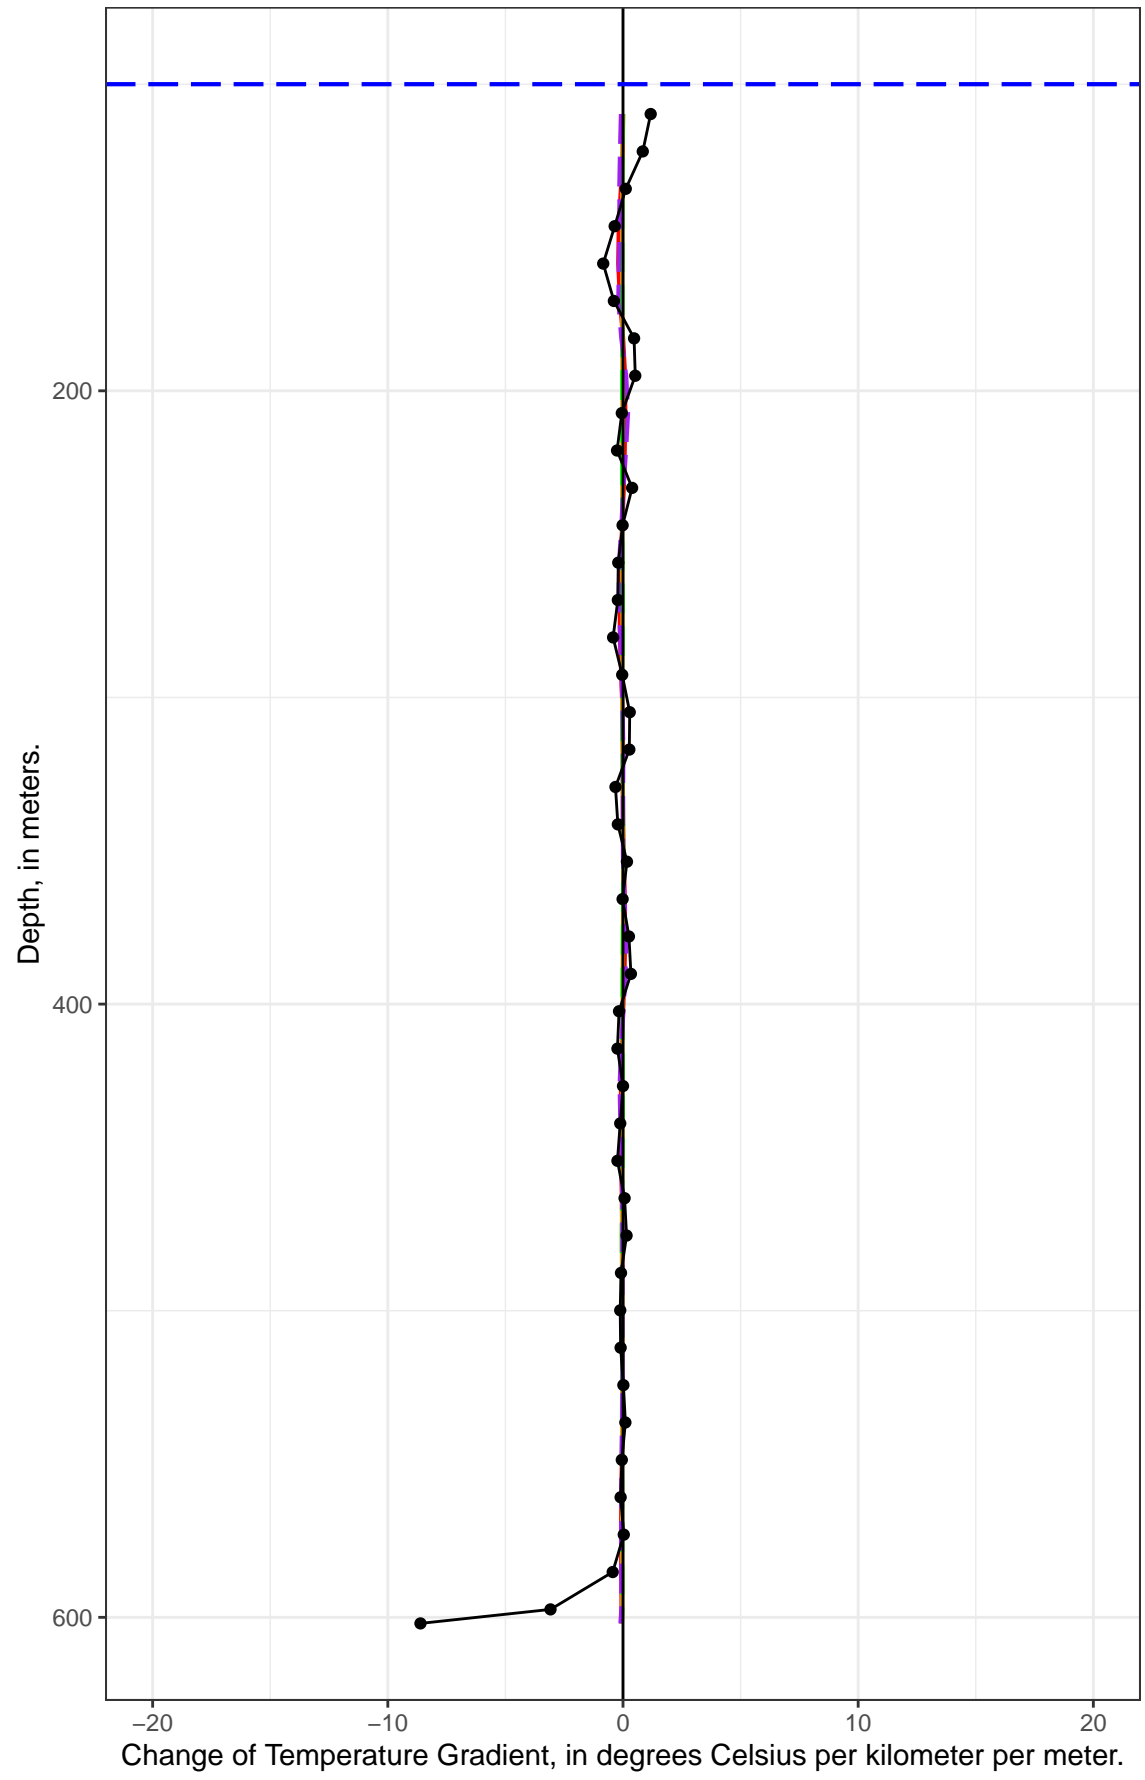

• Data — LOESS (AICC) — LOESS (constant) — LOESS (GCV) — Spline

• Data — LOESS (AICC) — LOESS (constant) — LOESS (GCV) — Spline

• Data — LOESS (AICC) — LOESS (constant) — LOESS (GCV) — Spline

ID: 166 [H-6-78-1015\_KILBOURNE\_HOLE] Smoothed Profile

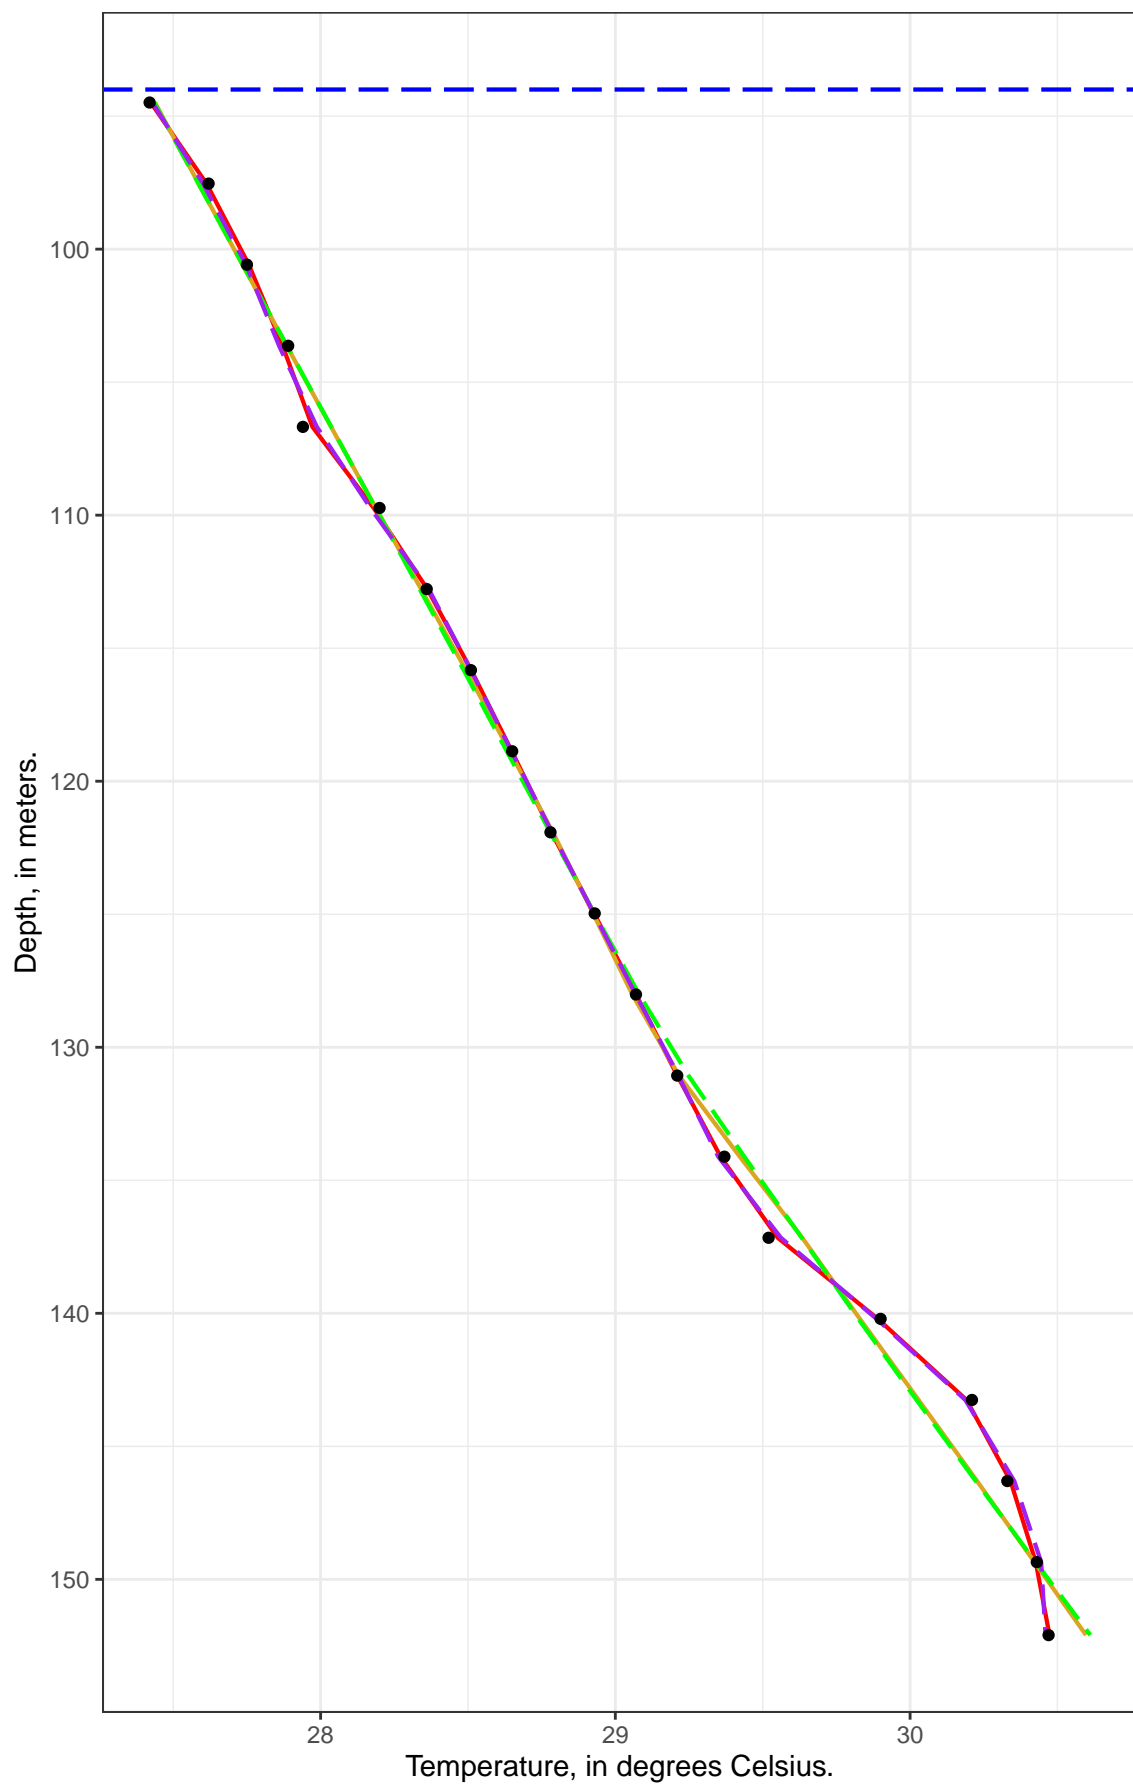

• Data — LOESS (AICC) — LOESS (constant) — LOESS (GCV) — Spline

ID: 166 [H-6-78-1015\_KILBOURNE\_HOLE] First Derivative

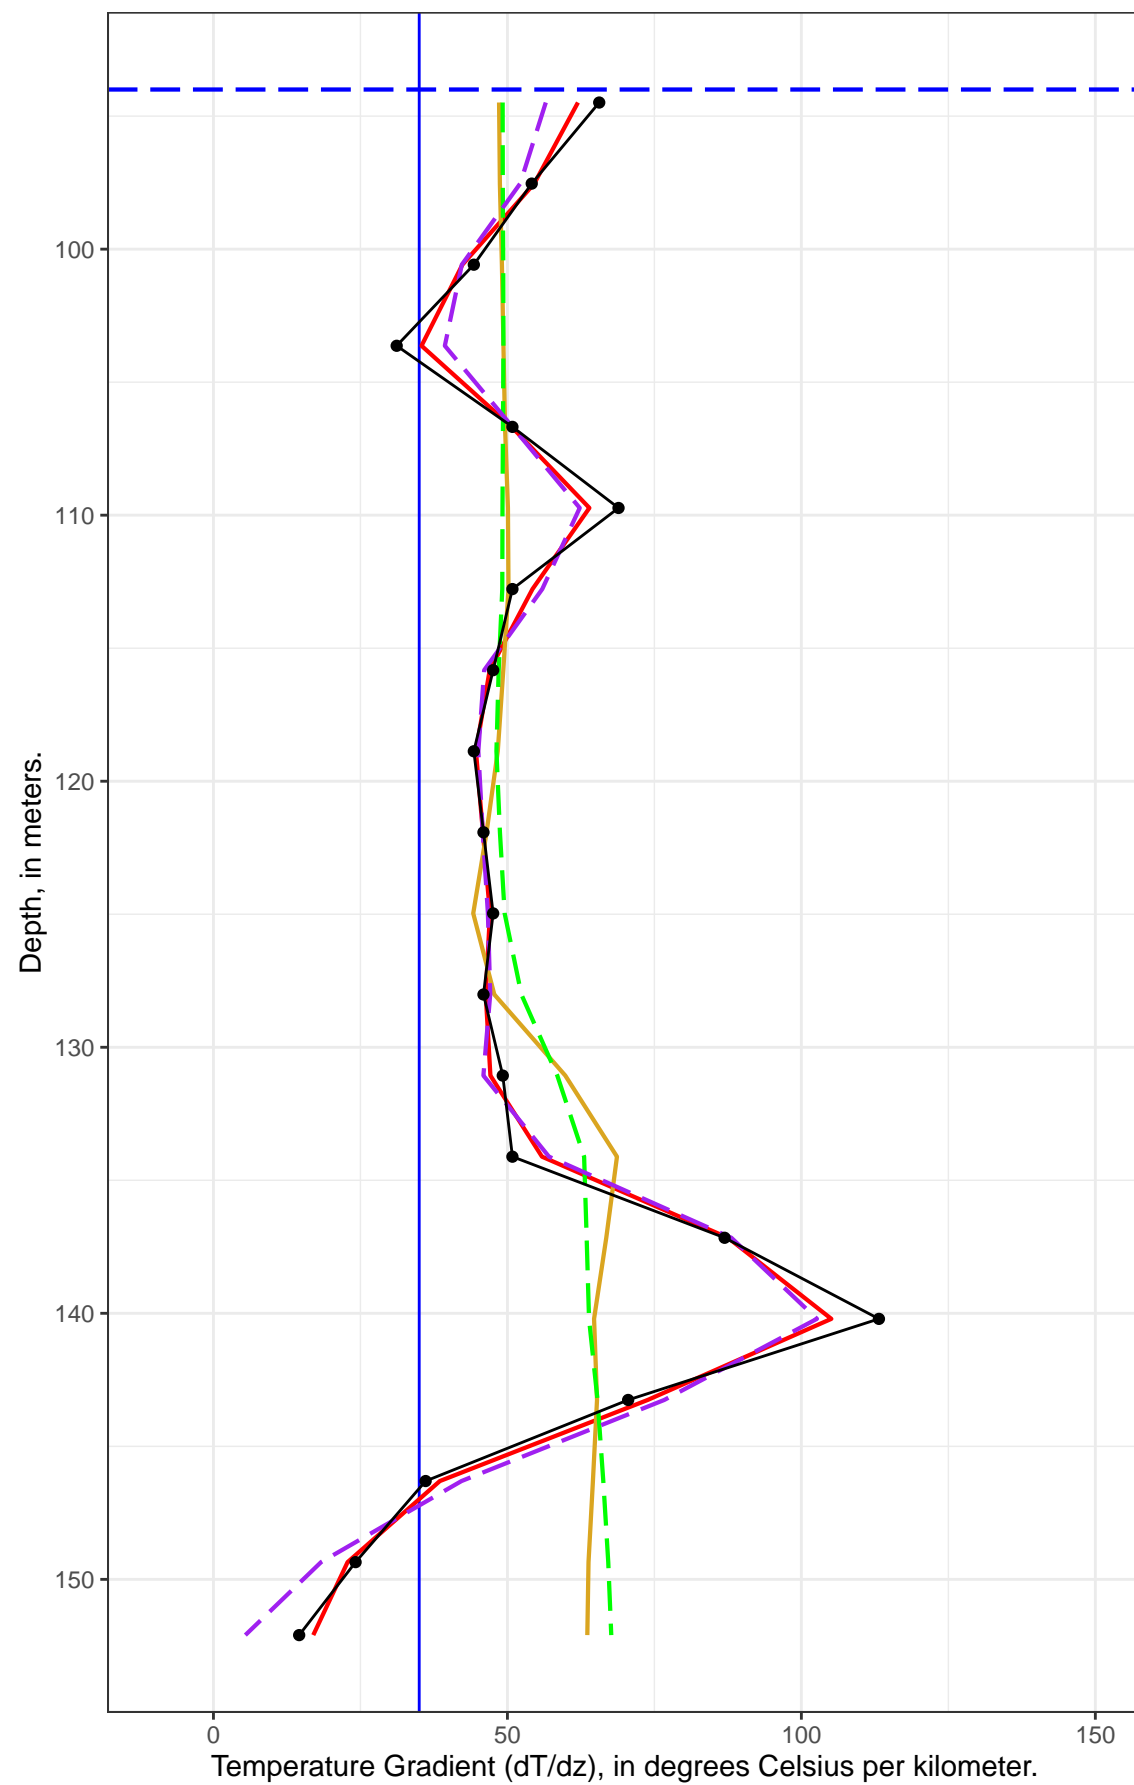

• Data — LOESS (AICC) — LOESS (constant) — LOESS (GCV) — Spline

ID: 166 [H-6-78-1015\_KILBOURNE\_HOLE] Second Derivative

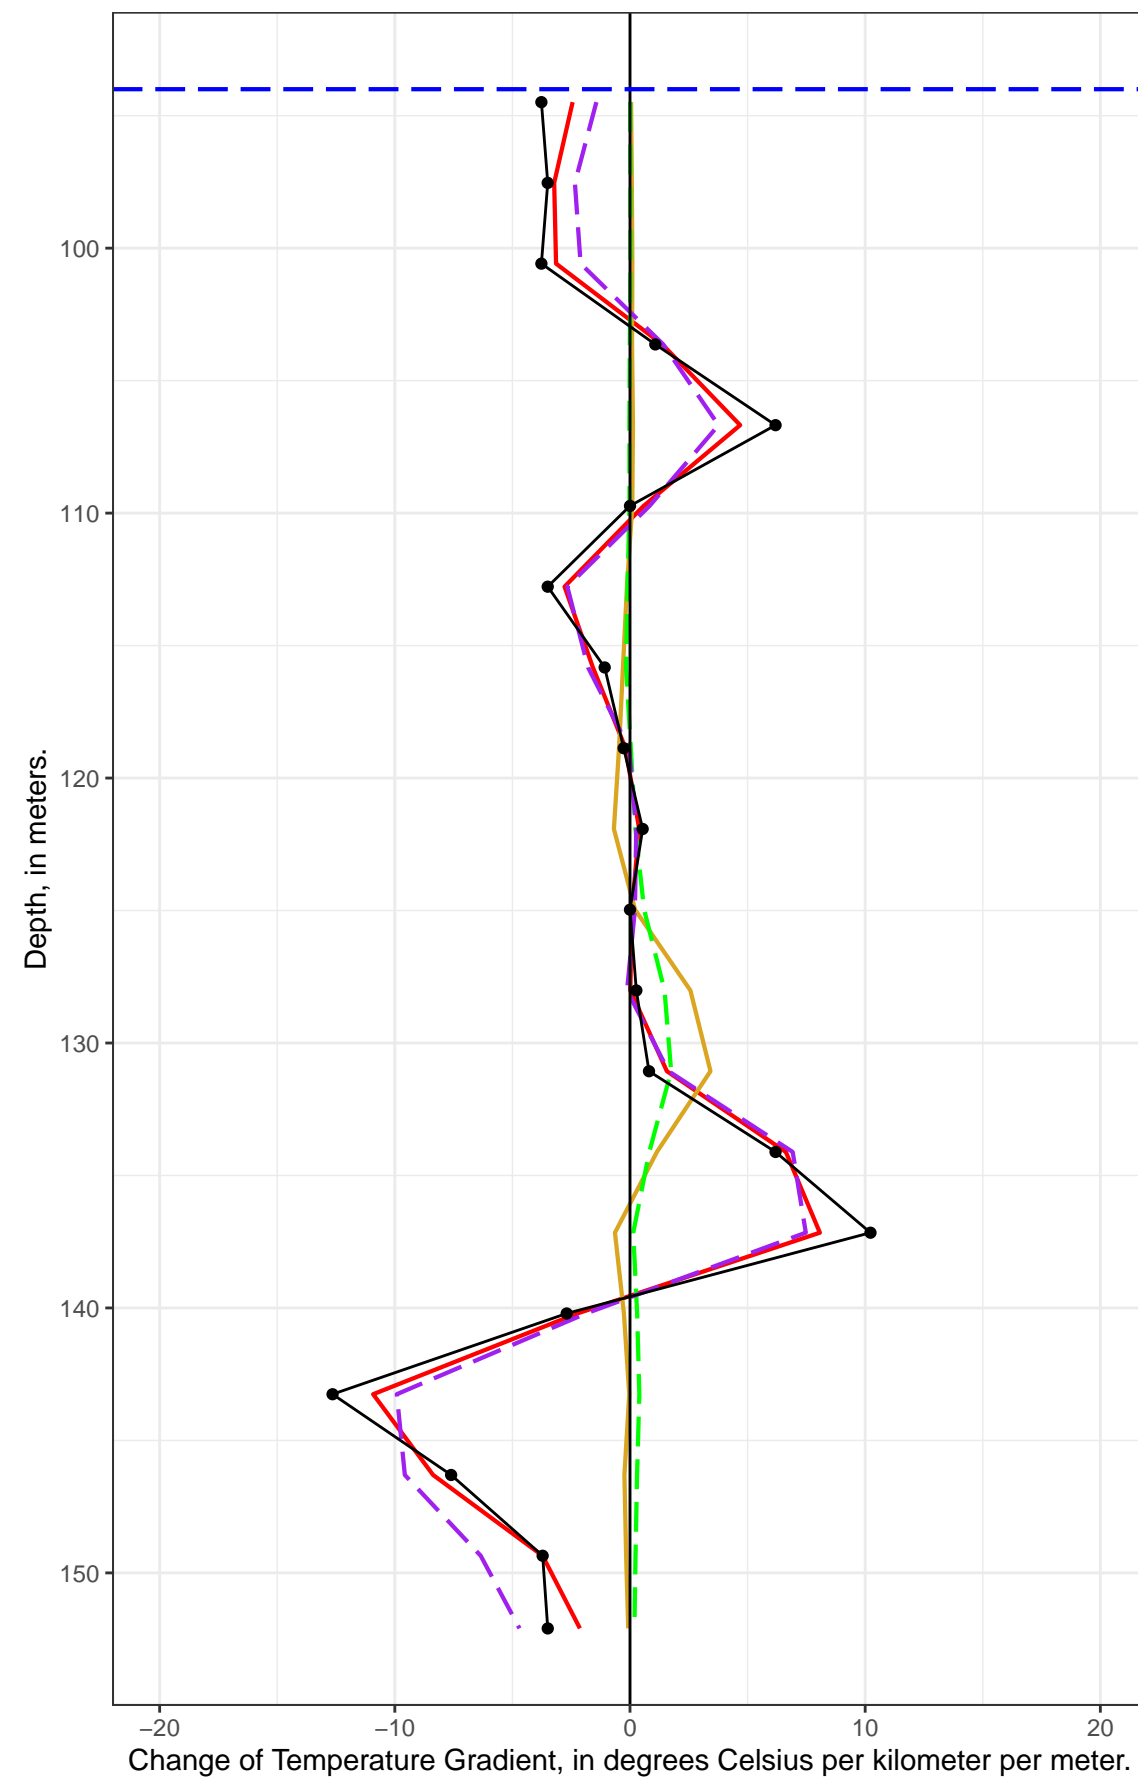

• Data — LOESS (AICC) — LOESS (constant) — LOESS (GCV) — Spline

ID: 167 [H-6-78-1016\_KILBOURNE\_HOLE] Smoothed Profile

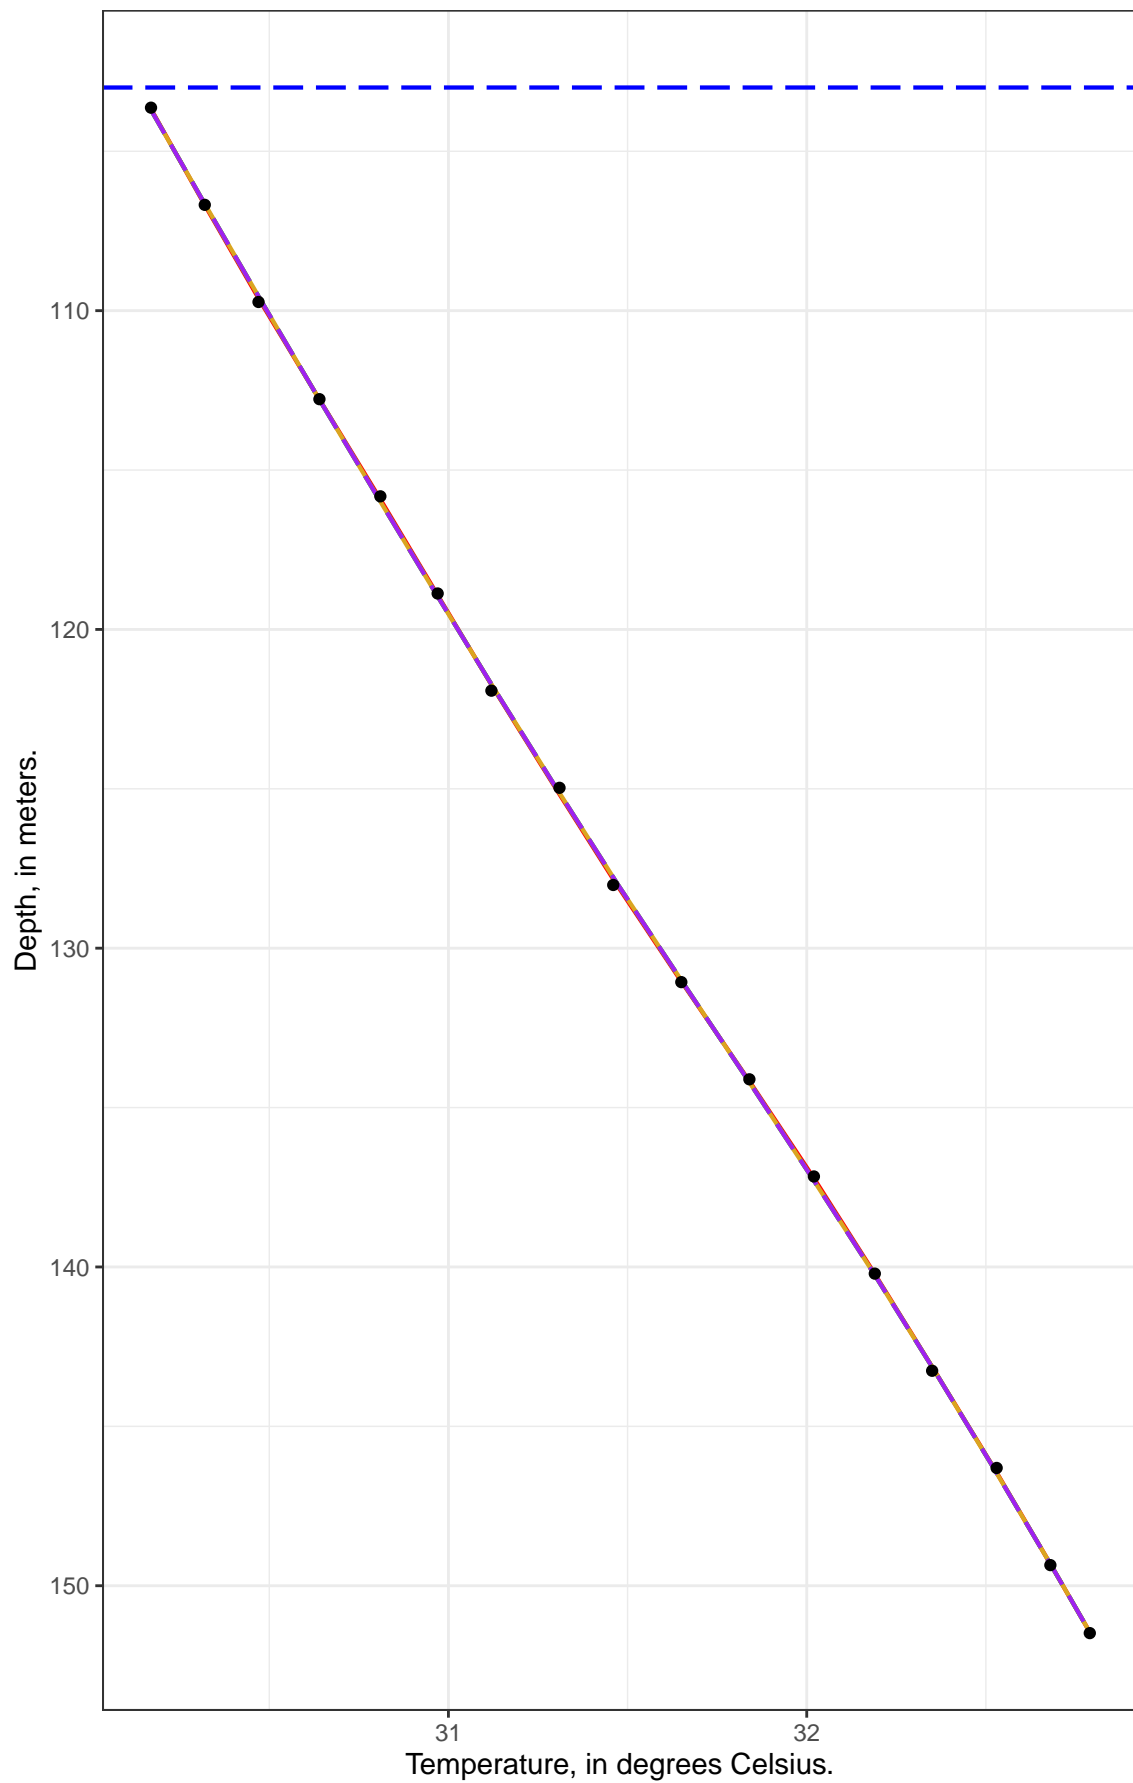

ID: 167 [H-6-78-1016\_KILBOURNE\_HOLE] First Derivative

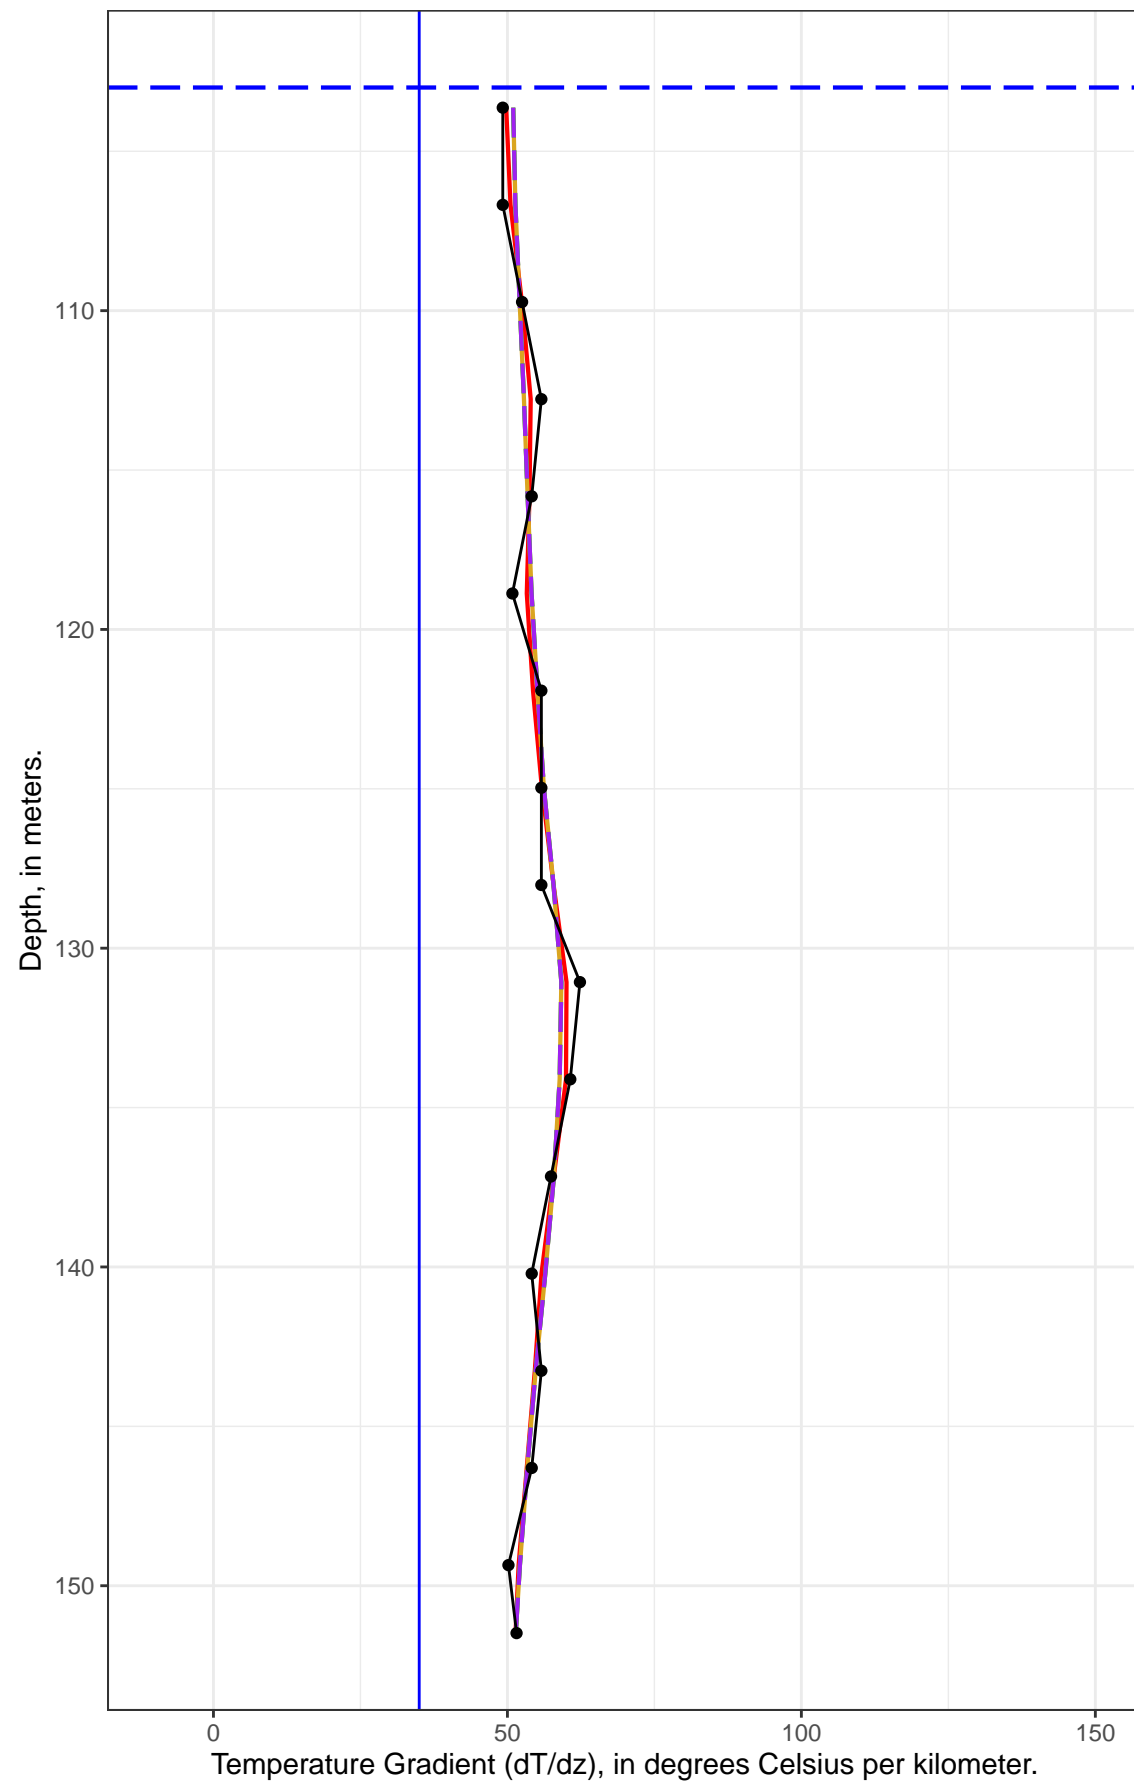

ID: 167 [H-6-78-1016\_KILBOURNE\_HOLE] Second Derivative

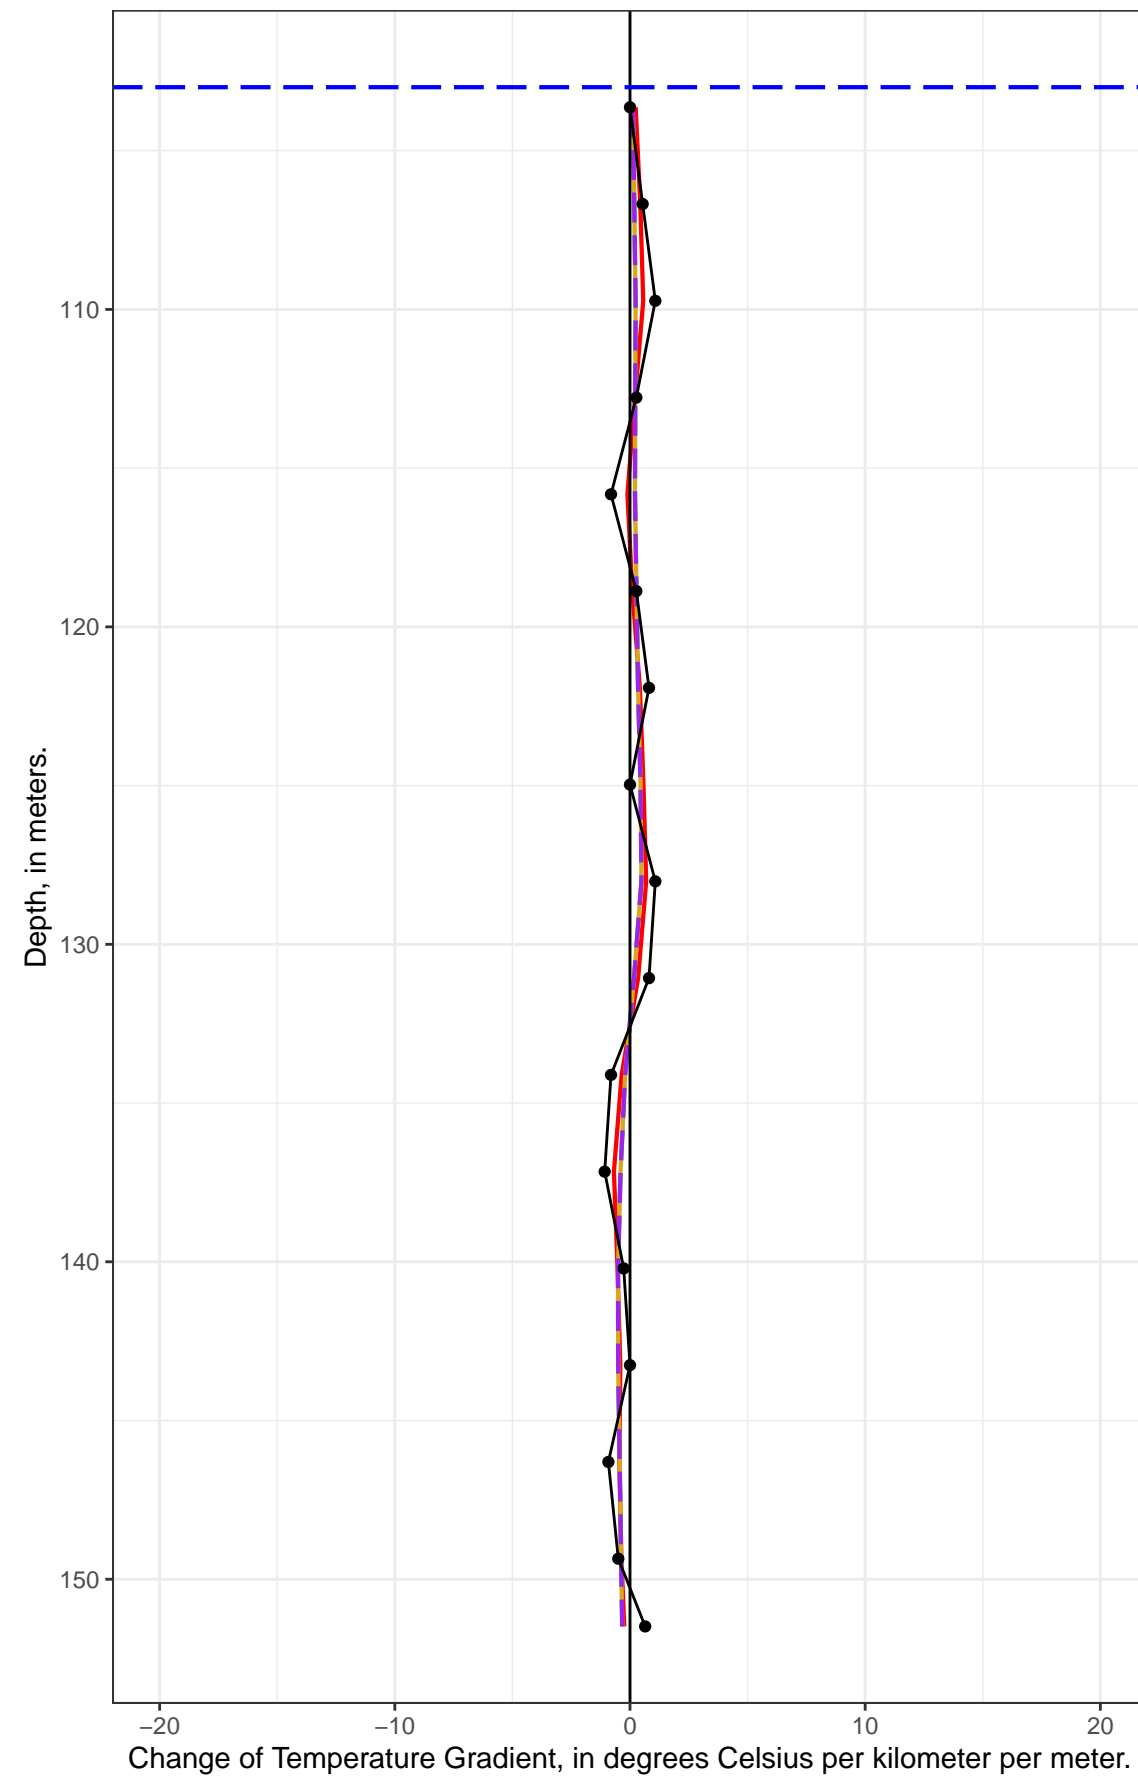

• Data — LOESS (AICC) — LOESS (constant) — LOESS (GCV) — Spline

• Data — LOESS (AICC) — LOESS (constant) — LOESS (GCV) — Spline

• Data — LOESS (AICC) — LOESS (constant) — LOESS (GCV) — Spline

ID: 168 [H-6-78-1017\_KILBOURNE\_HOLE] Smoothed Profile

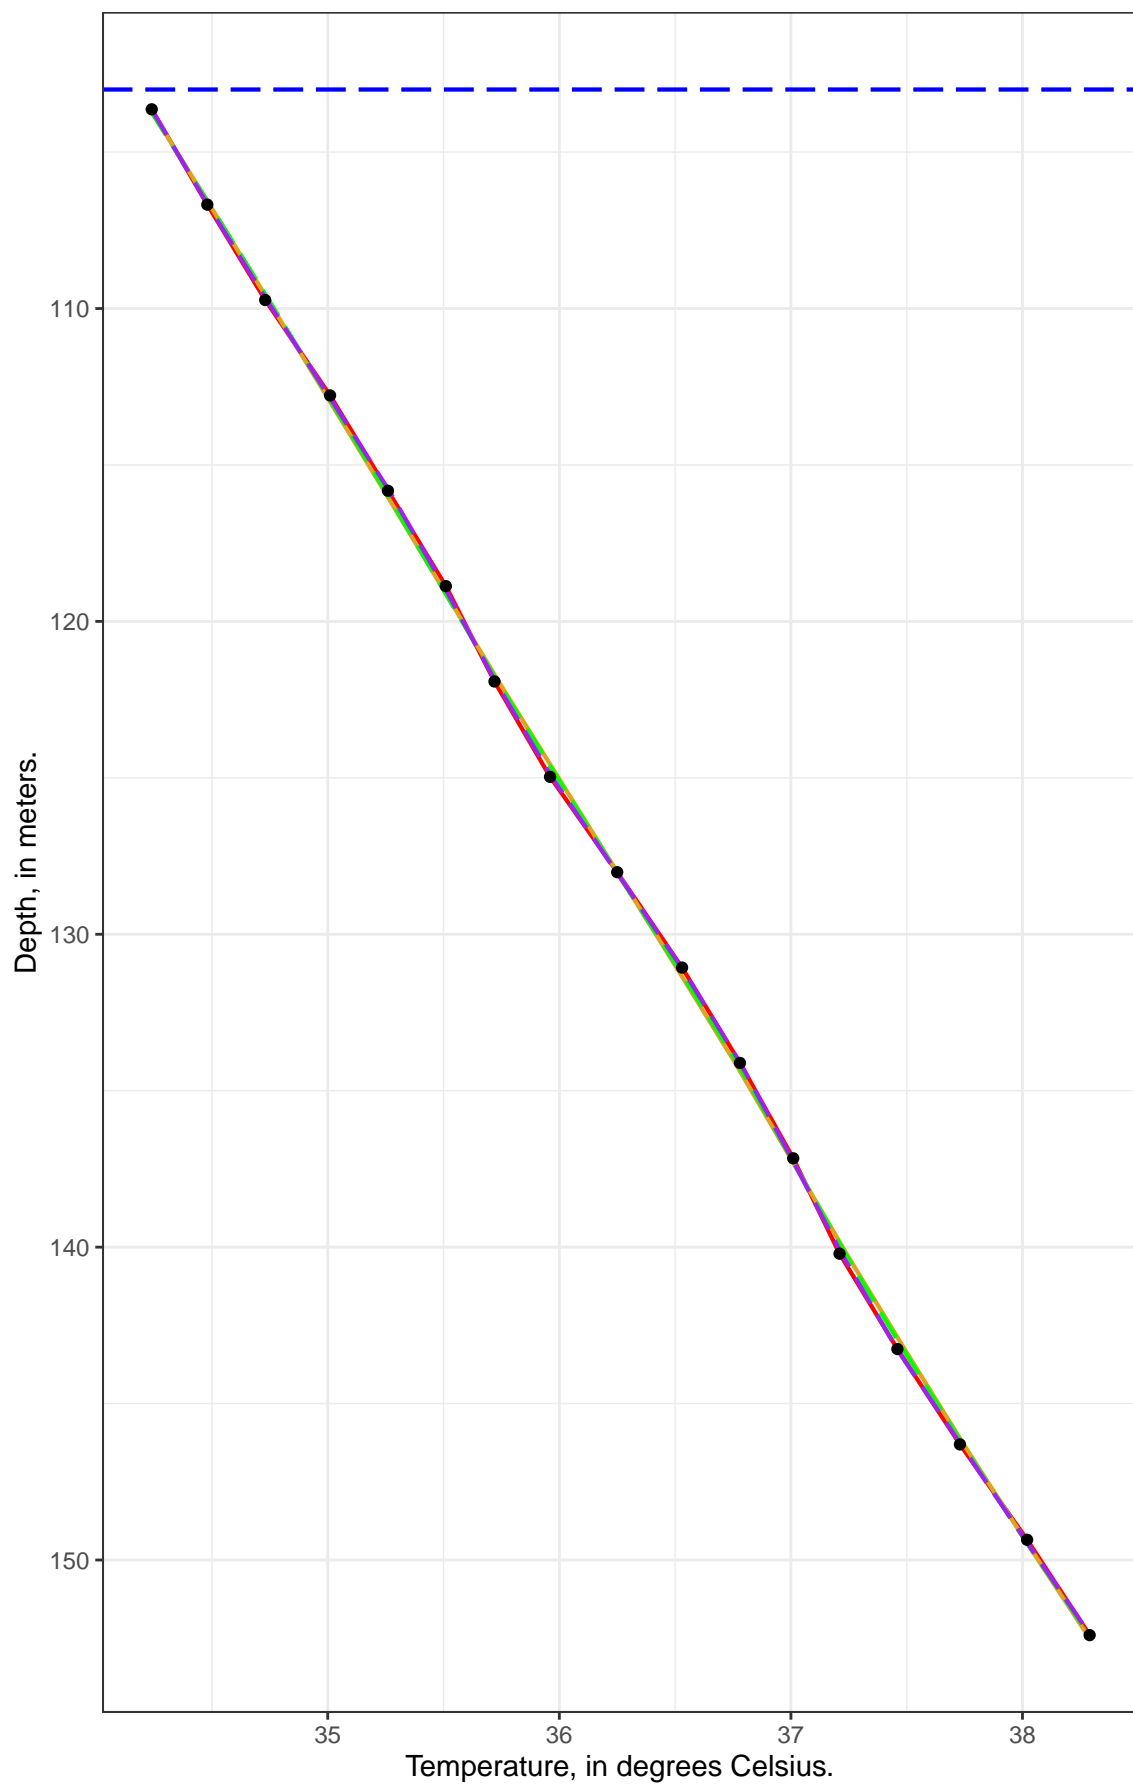

ID: 168 [H-6-78-1017\_KILBOURNE\_HOLE] First Derivative

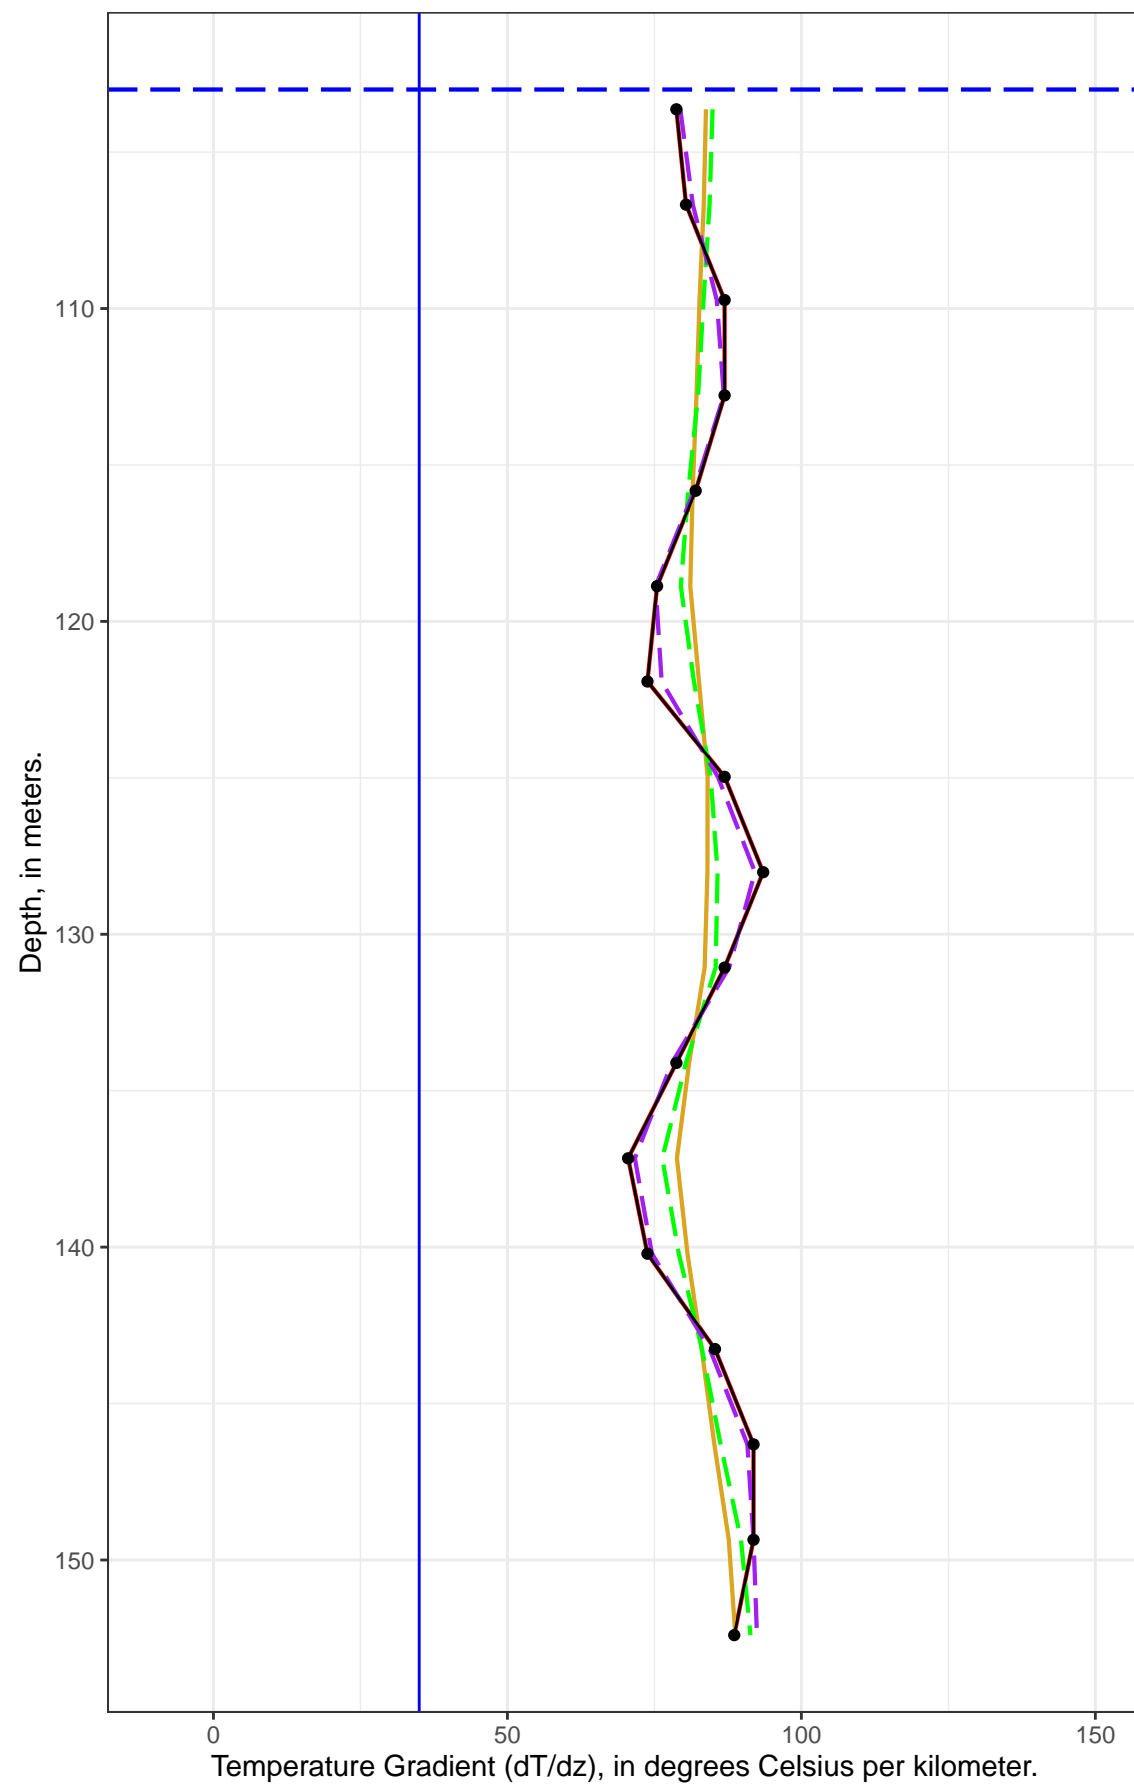

ID: 168 [H-6-78-1017\_KILBOURNE\_HOLE] Second Derivative

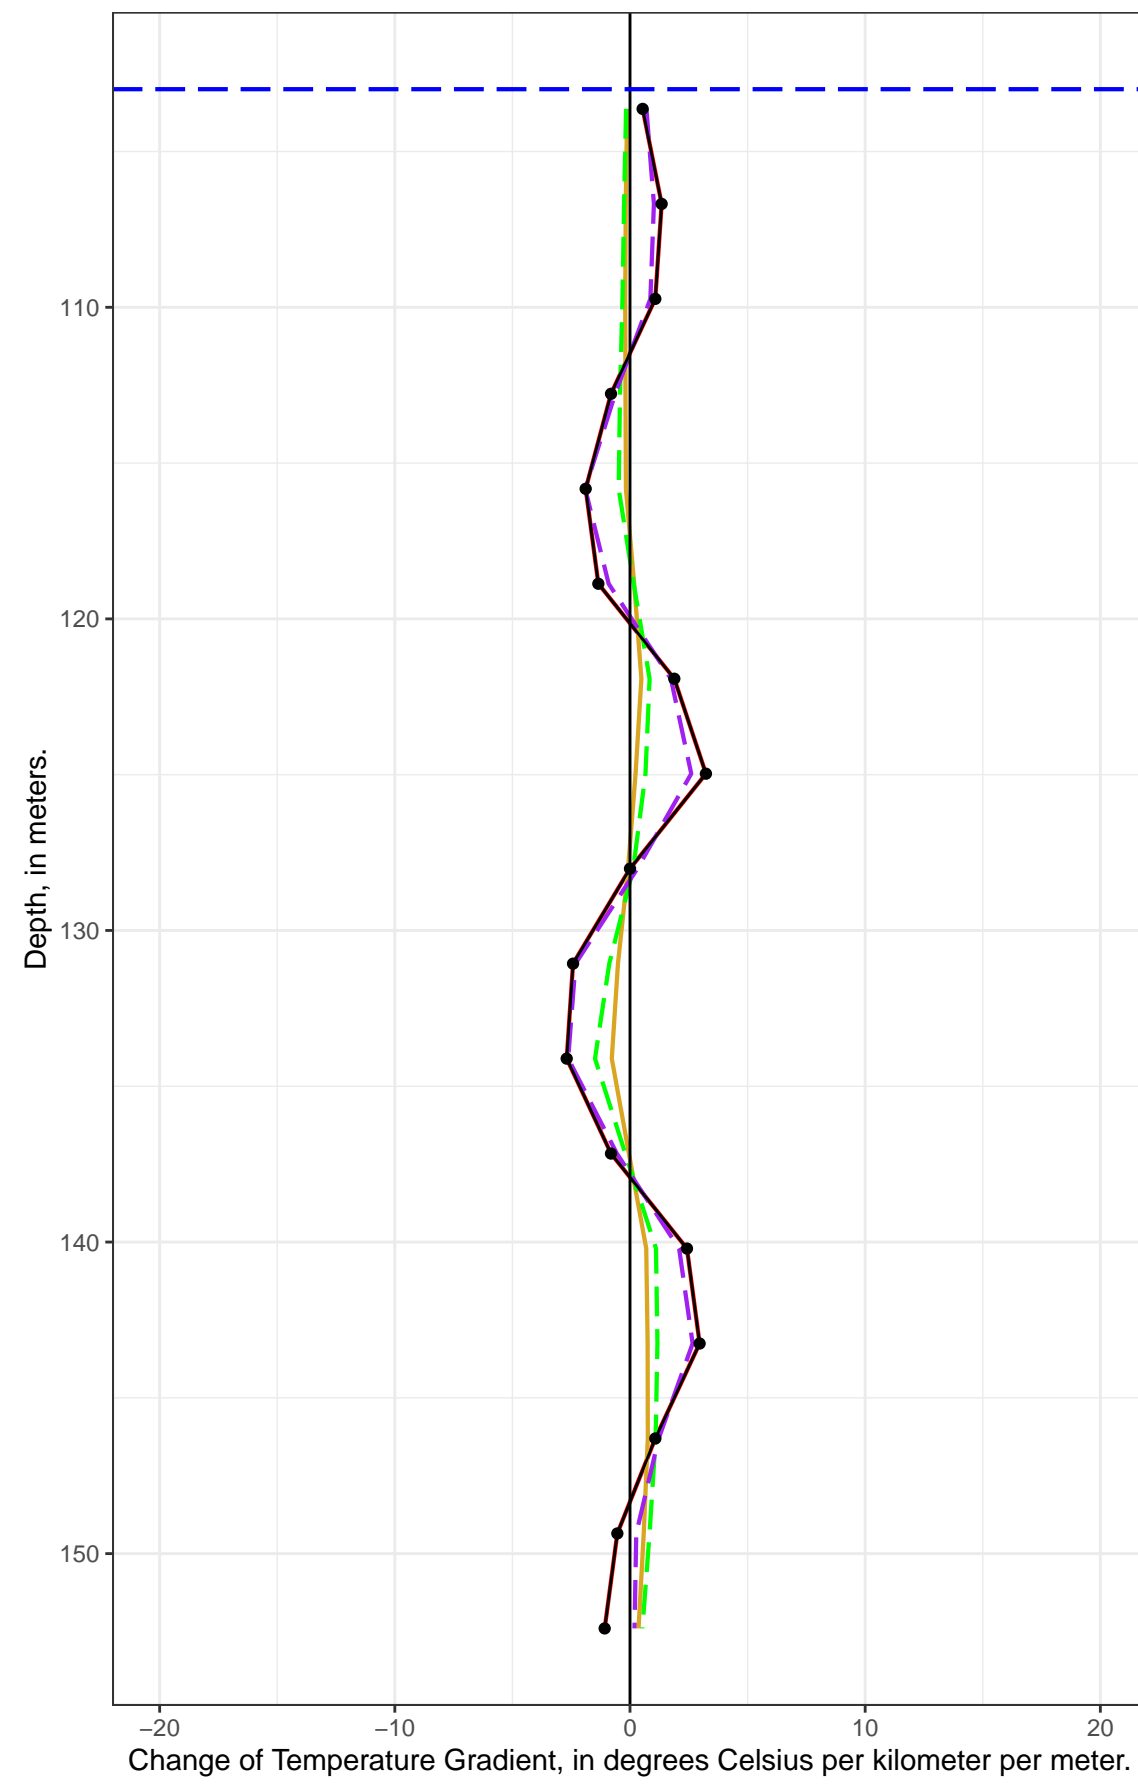

• Data • LOESS (AICC) • LOESS (constant) • LOESS (GCV) • Spline

• Data • LOESS (AICC) • LOESS (constant) • LOESS (GCV) • Spline

• Data • LOESS (AICC) • LOESS (constant) • LOESS (GCV) • Spline

ID: 169 [H-6-78-1017A\_KILBOURNE\_HOLE] Smoothed Profile

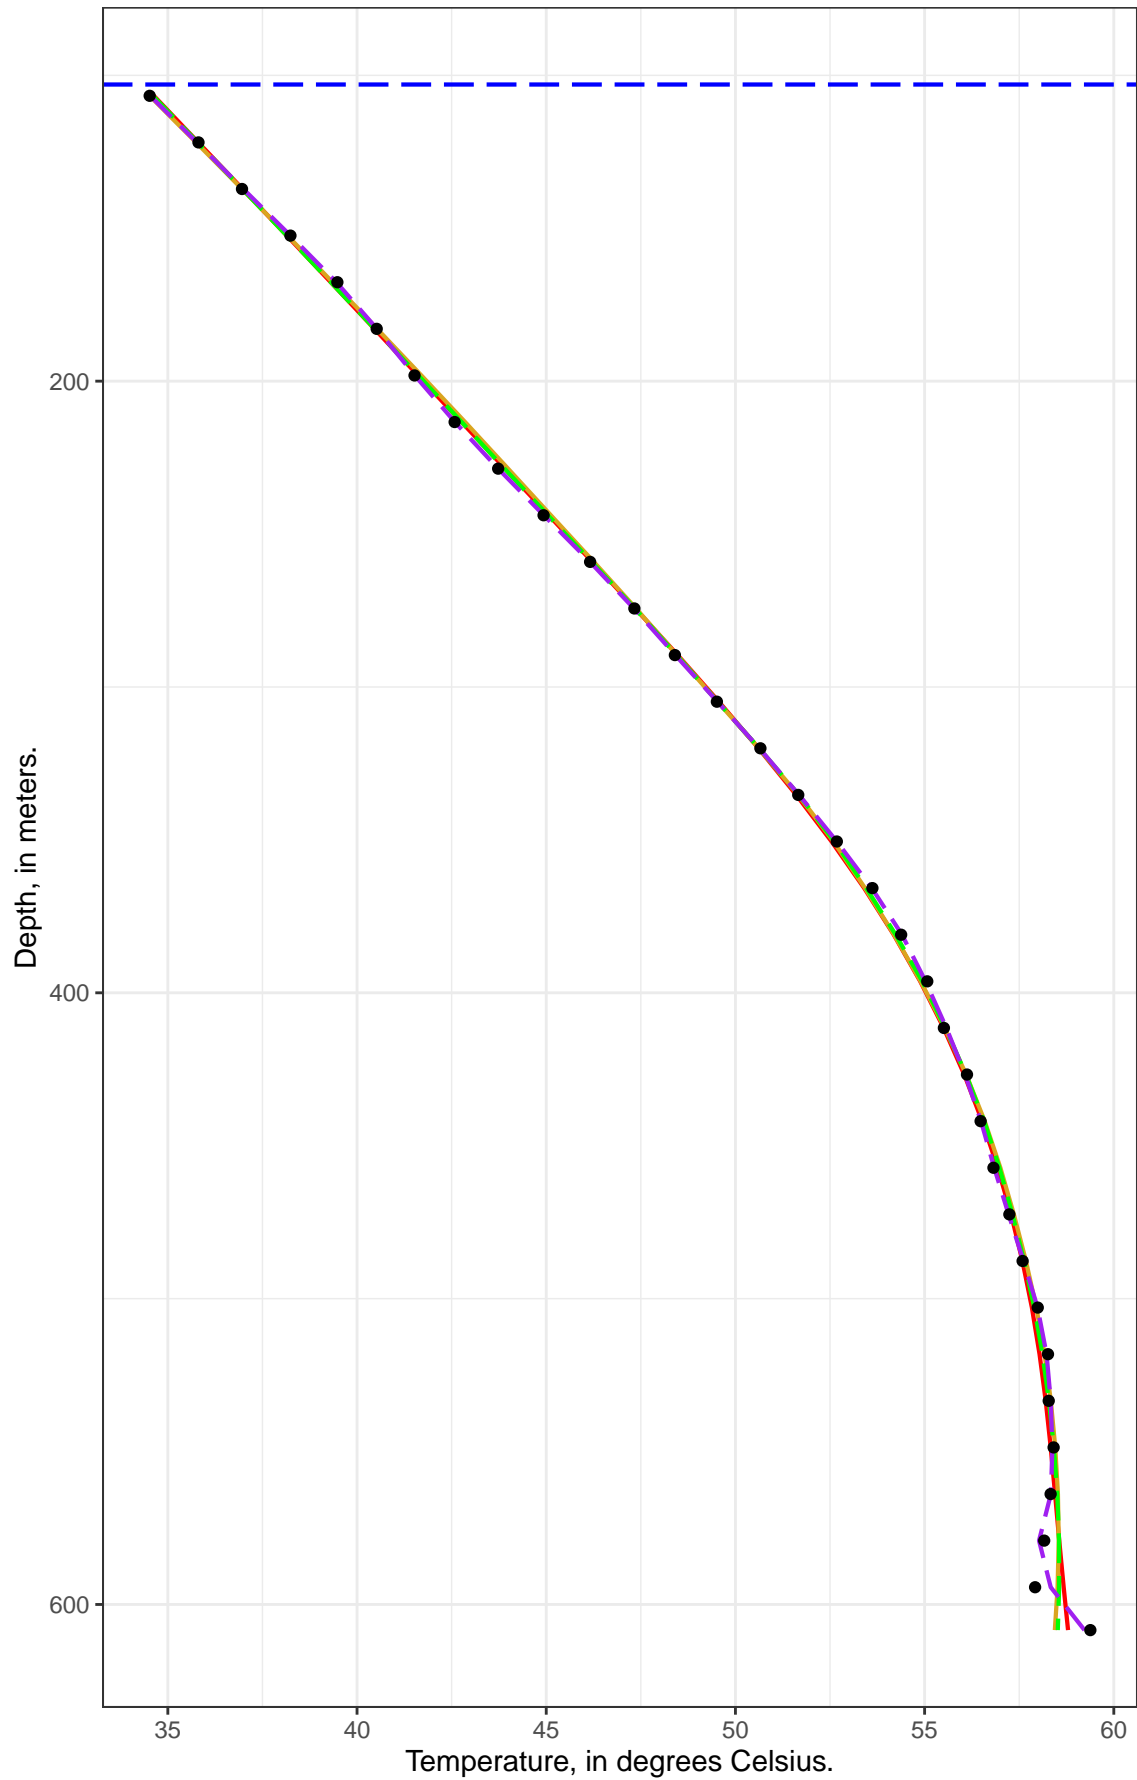

• Data — LOESS (AICC) — LOESS (constant) — LOESS (GCV) — Spline

ID: 169 [H-6-78-1017A\_KILBOURNE\_HOLE] First Derivative

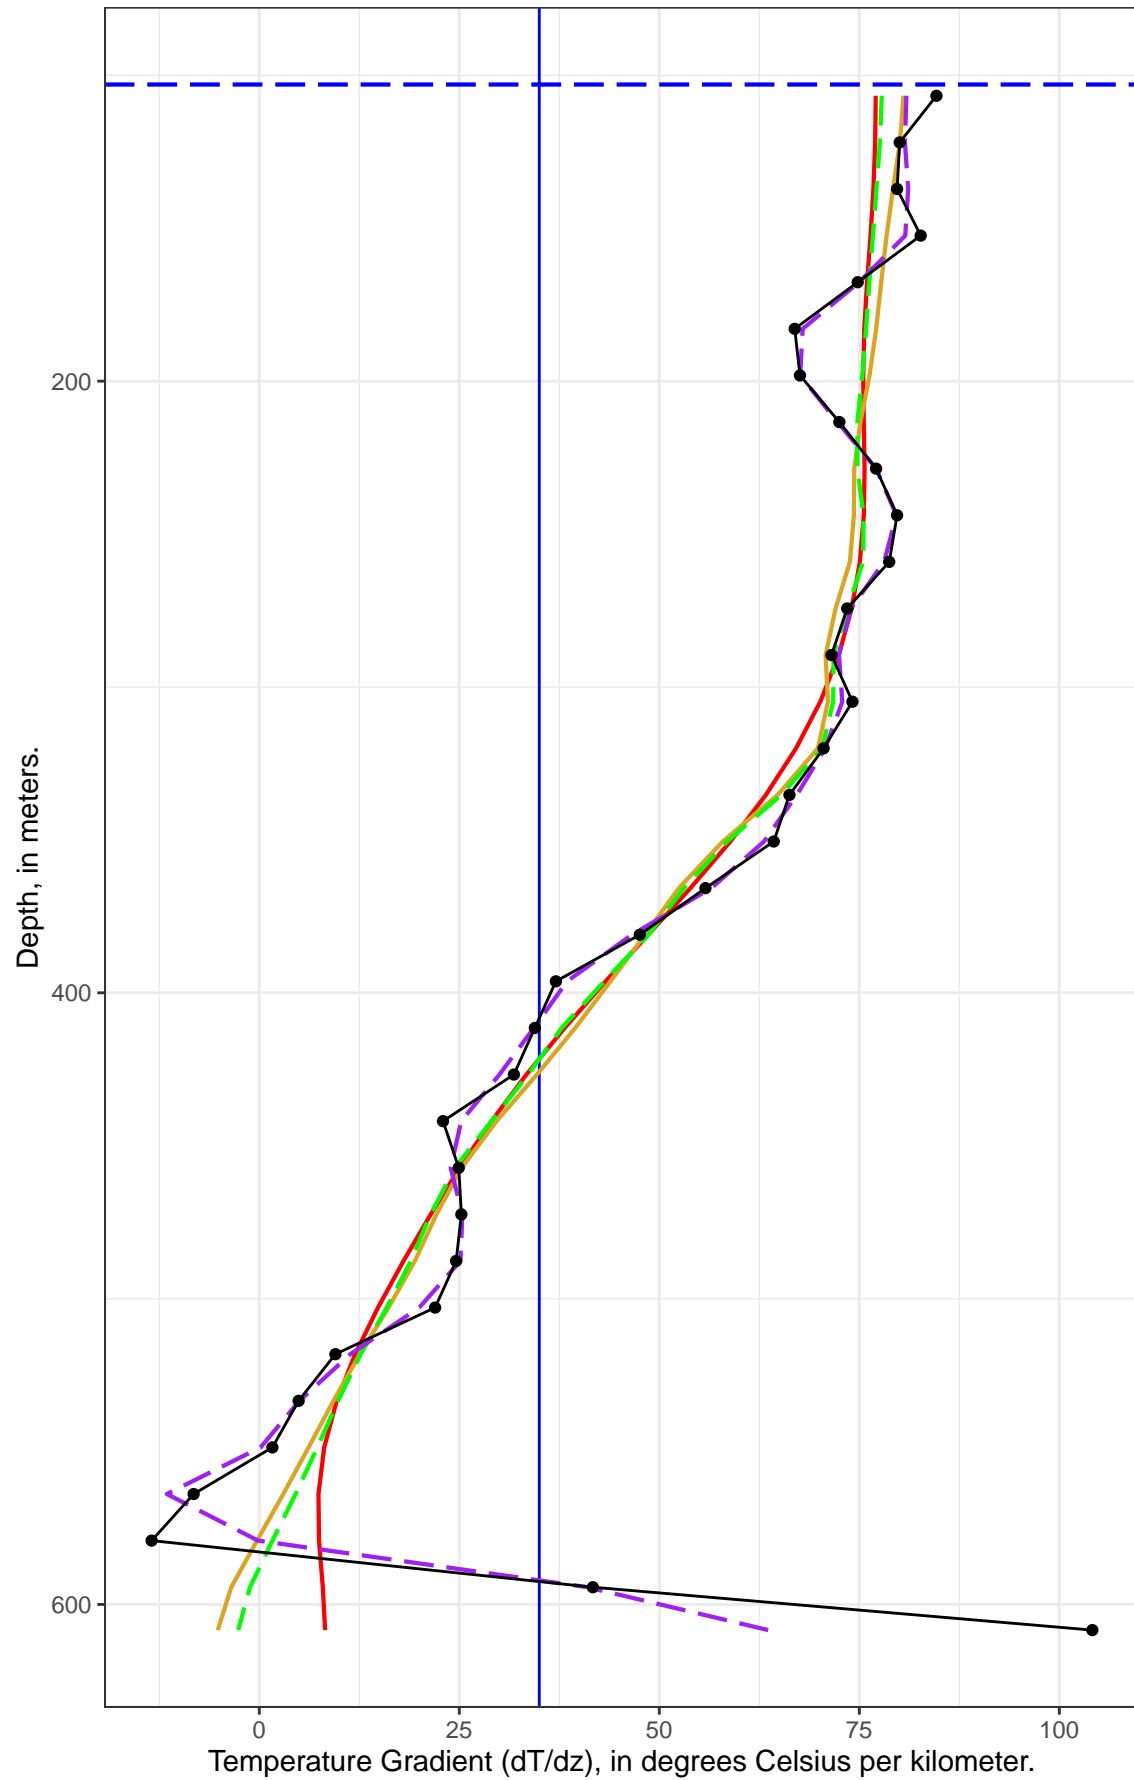

• Data — LOESS (AICC) — LOESS (constant) — LOESS (GCV) — Spline

ID: 169 [H-6-78-1017A\_KILBOURNE\_HOLE] Second Derivative

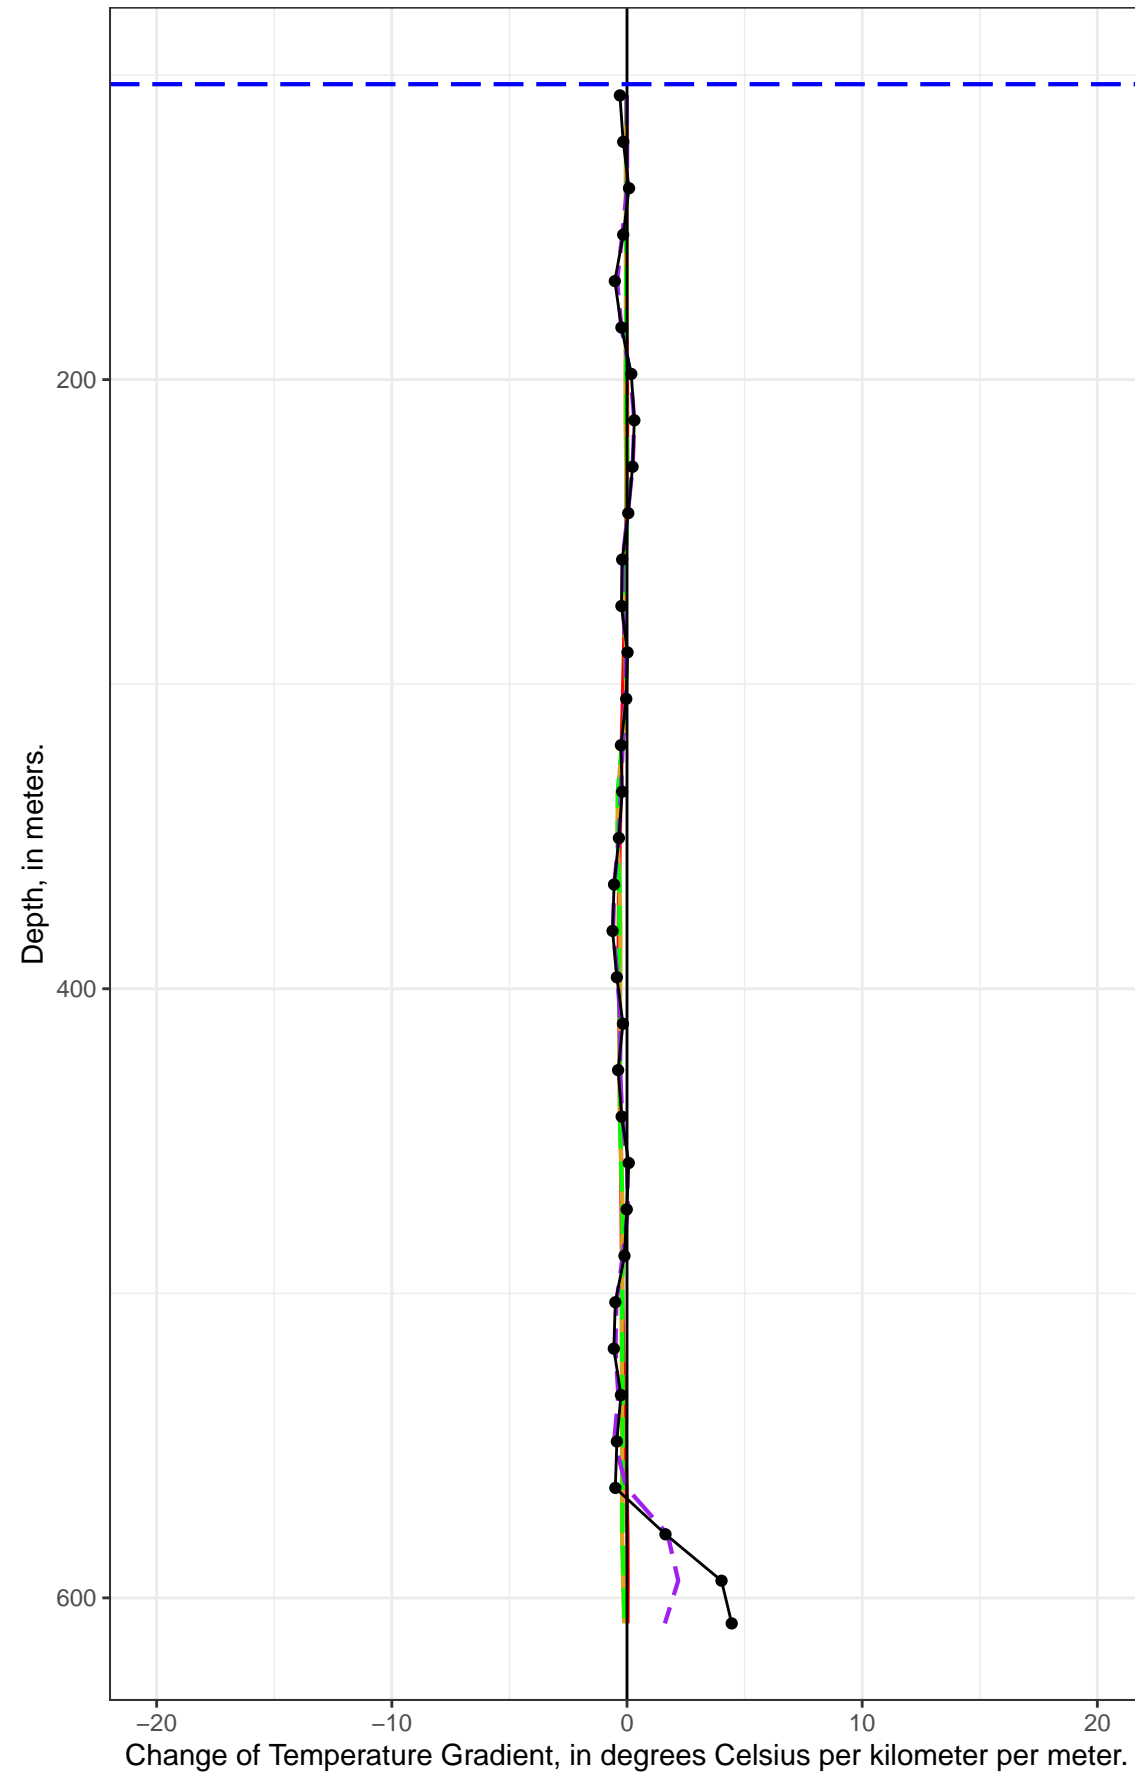

• Data — LOESS (AICC) — LOESS (constant) — LOESS (GCV) — Spline



ID: 170 [H-6-78-1018\_KILBOURNE\_HOLE] Smoothed Profile

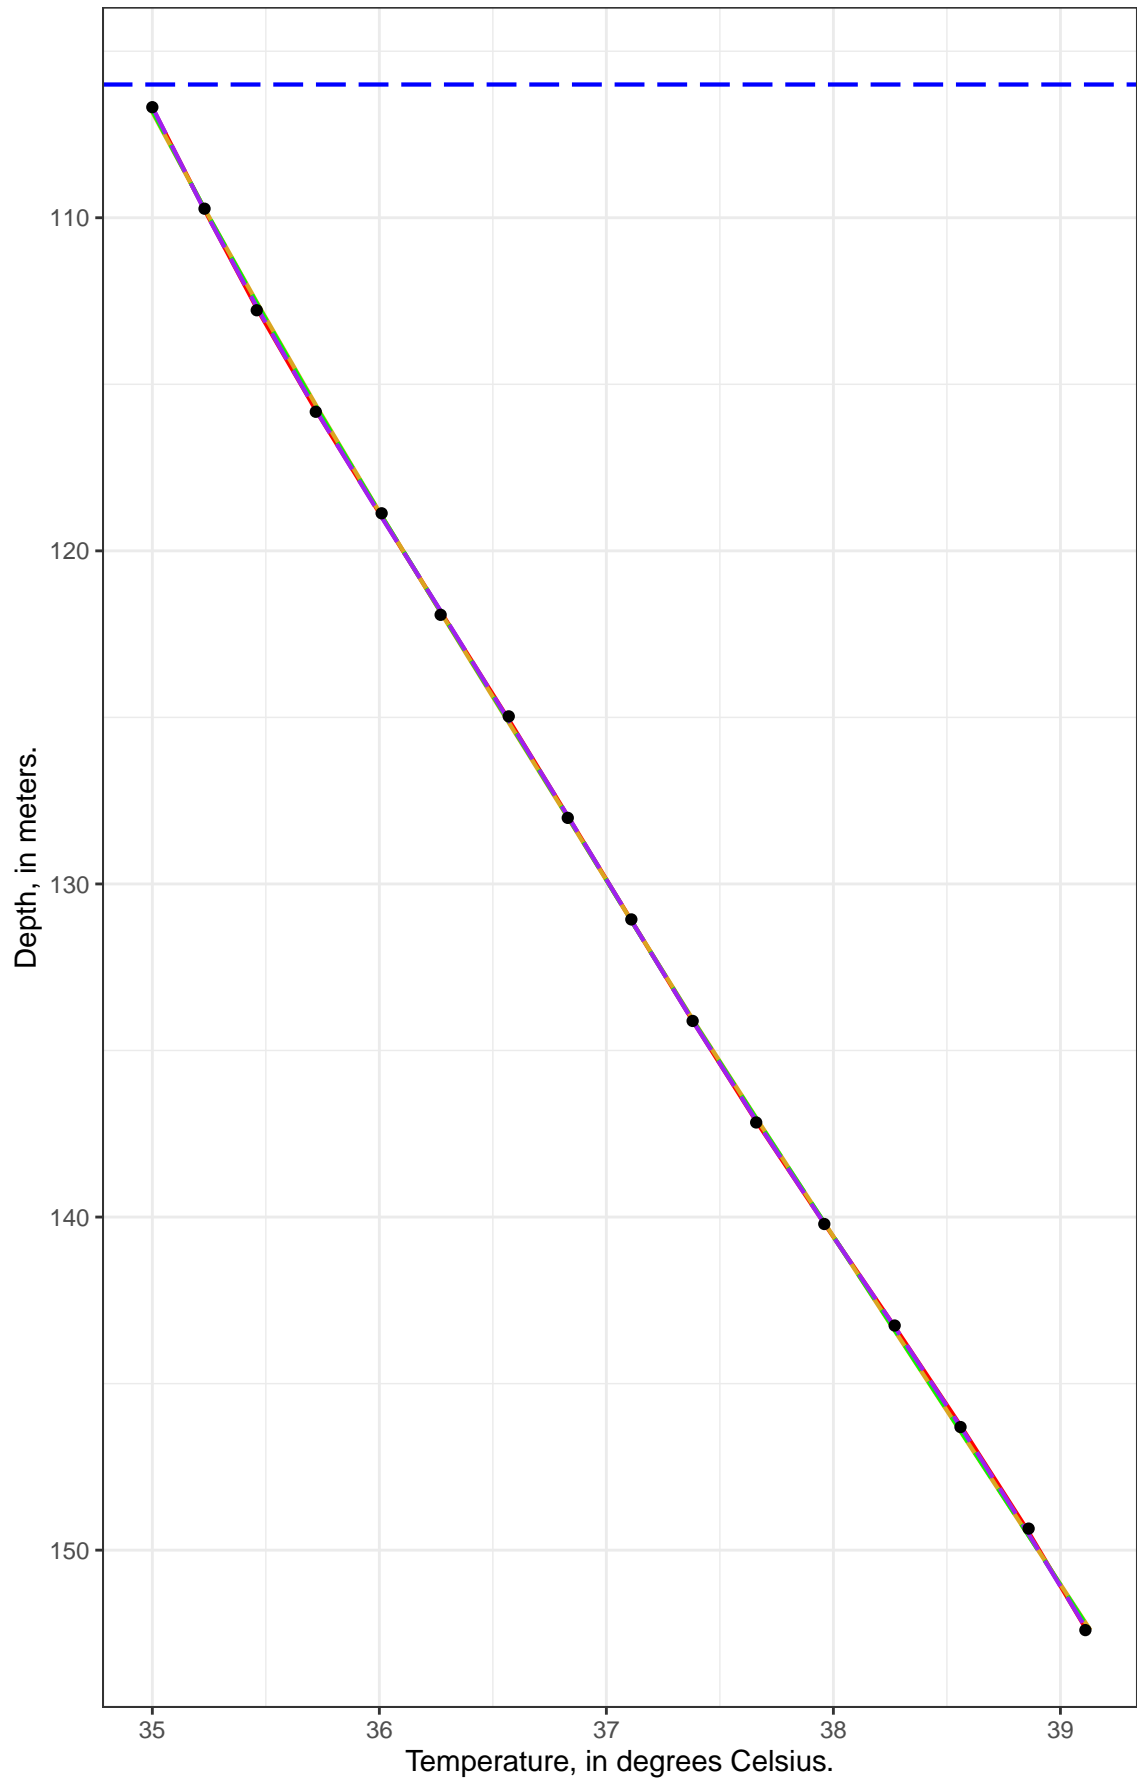

ID: 170 [H-6-78-1018\_KILBOURNE\_HOLE] First Derivative

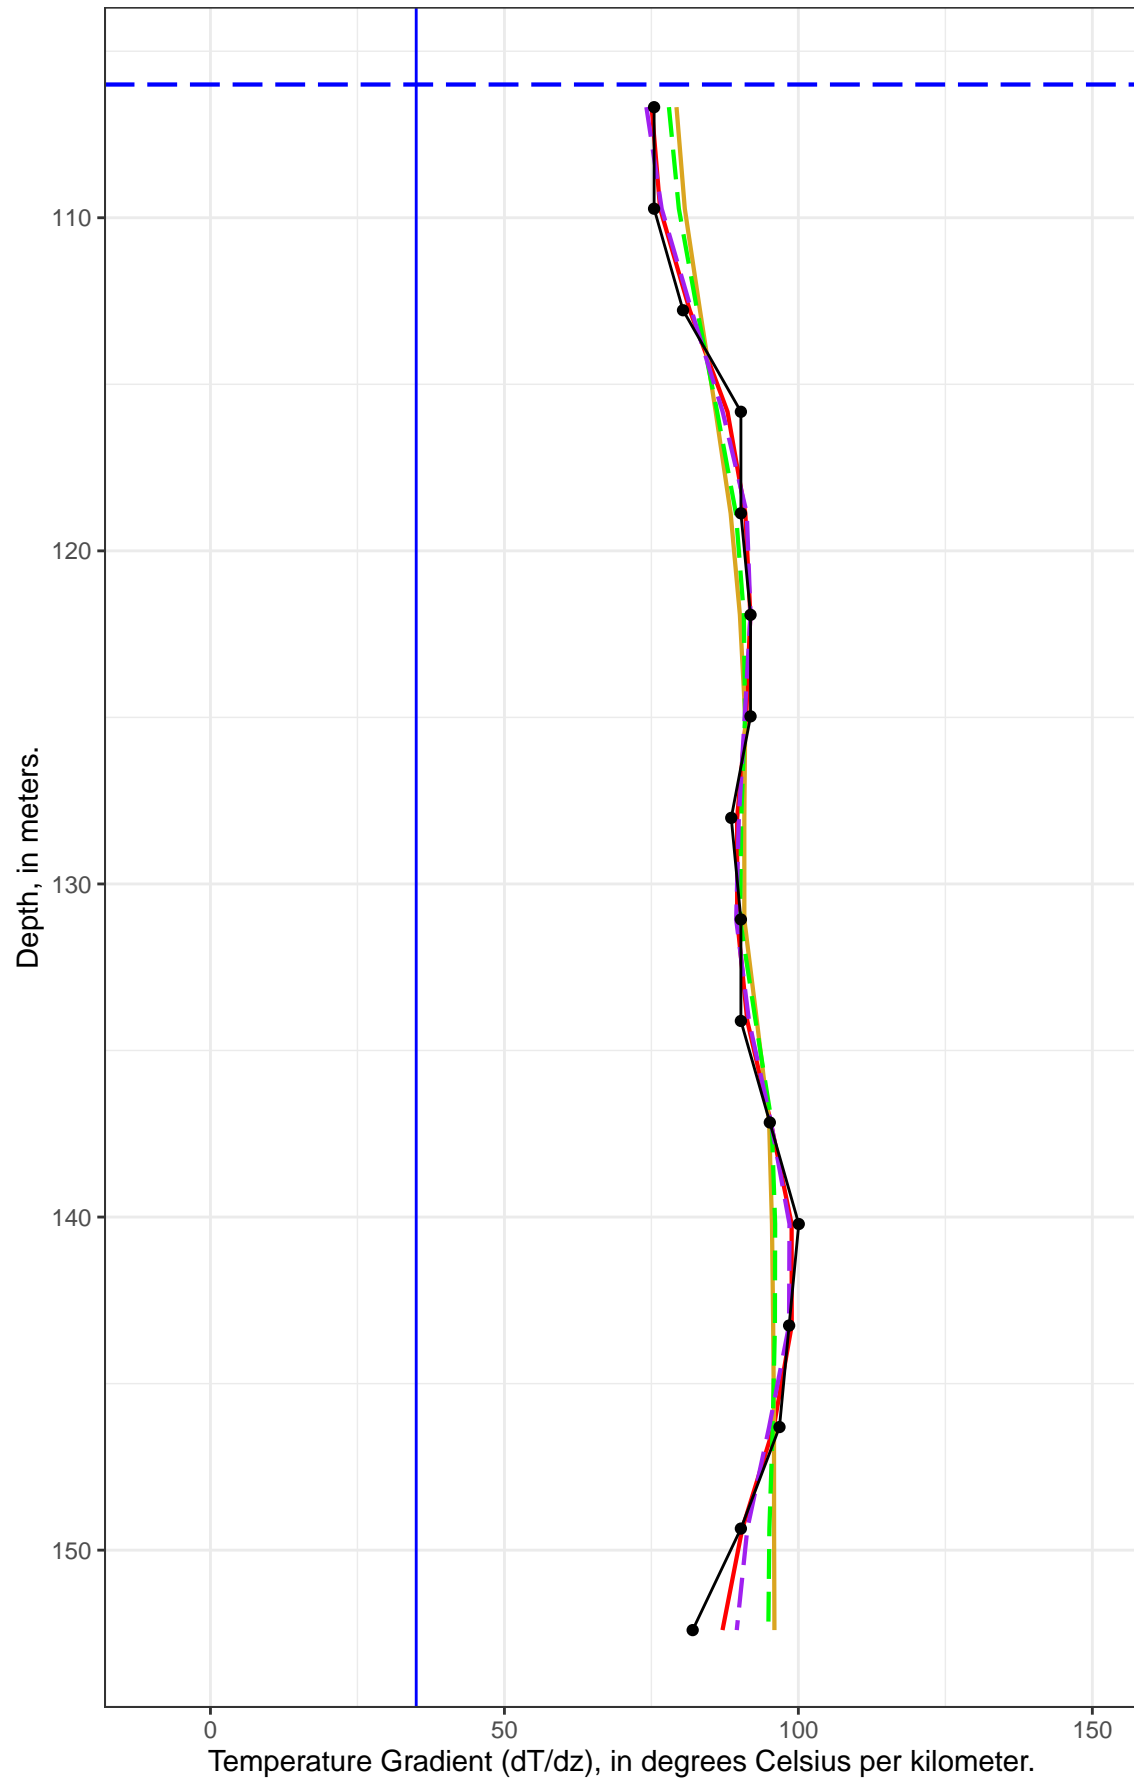

ID: 170 [H-6-78-1018\_KILBOURNE\_HOLE] Second Derivative

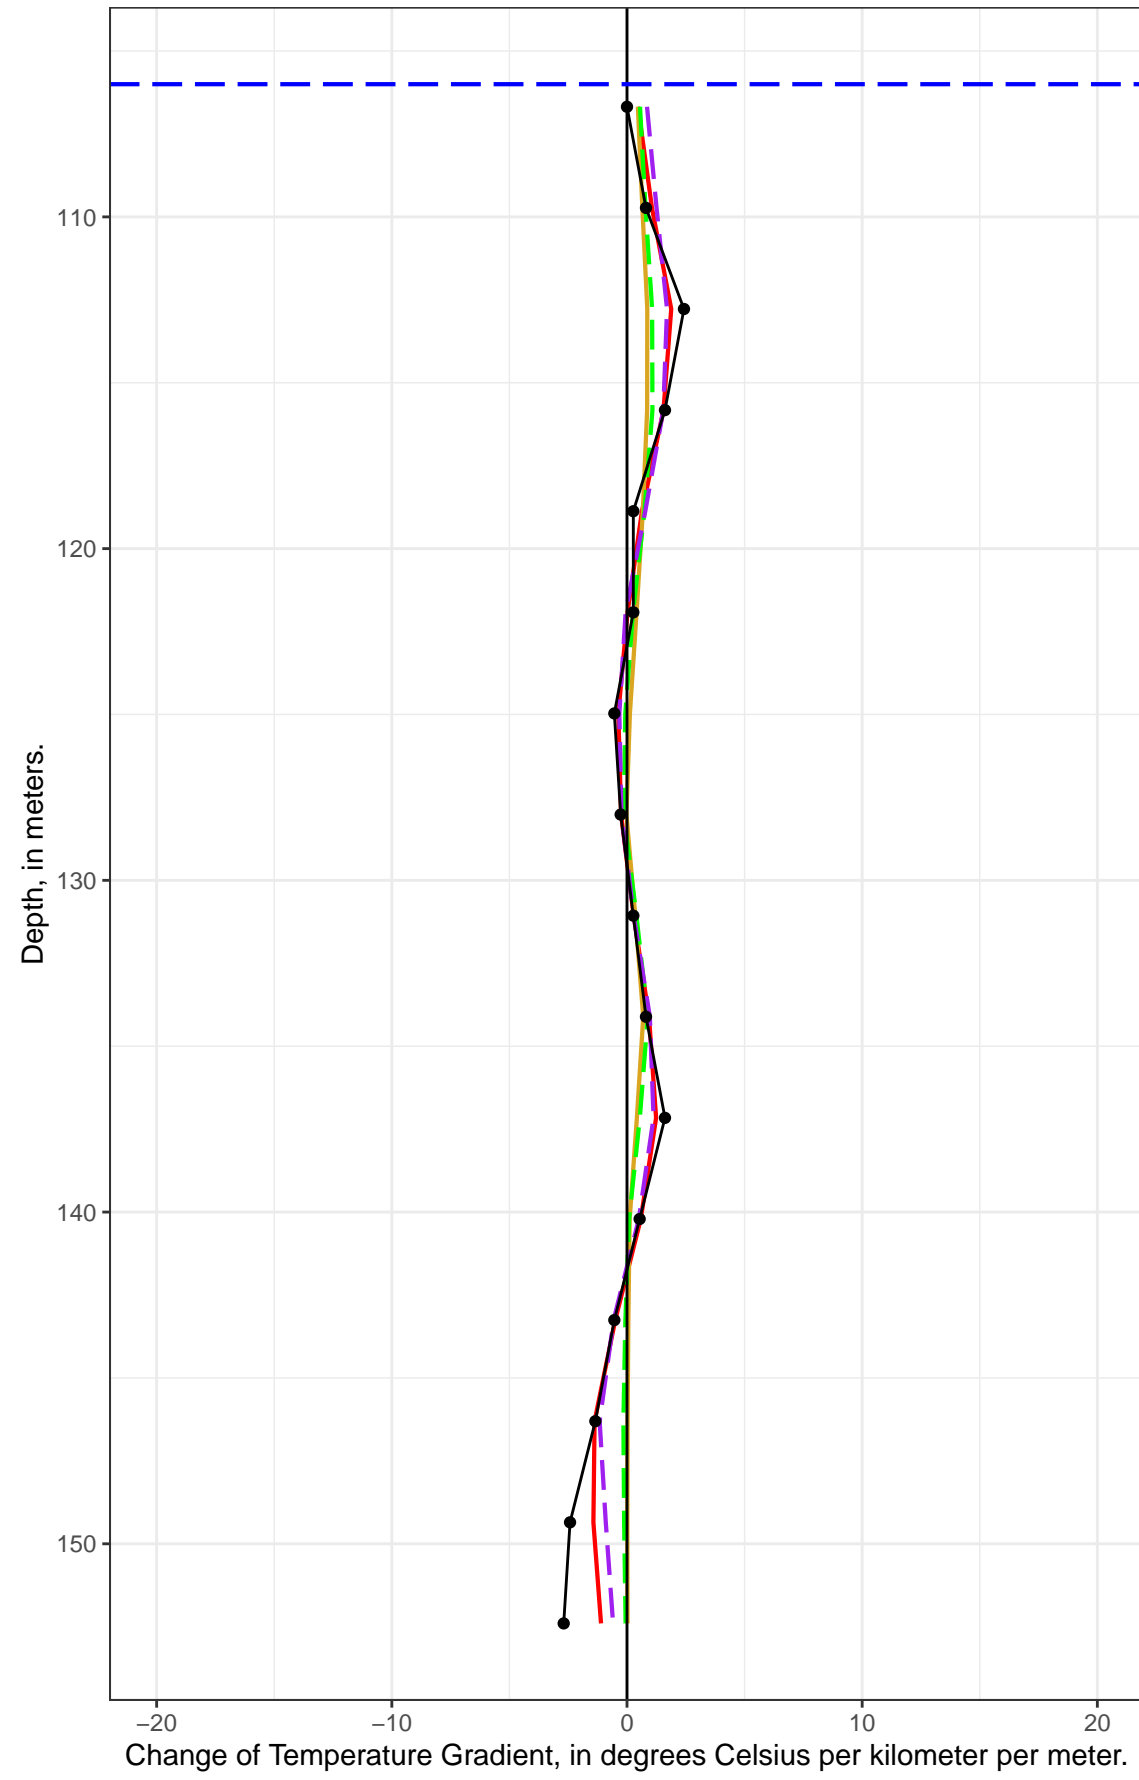

• Data • LOESS (AICC) • LOESS (constant) • LOESS (GCV) • Spline

• Data • LOESS (AICC) • LOESS (constant) • LOESS (GCV) • Spline

• Data • LOESS (AICC) • LOESS (constant) • LOESS (GCV) • Spline

ID: 171 [H-6-78-1019\_KILBOURNE\_HOLE] Smoothed Profile

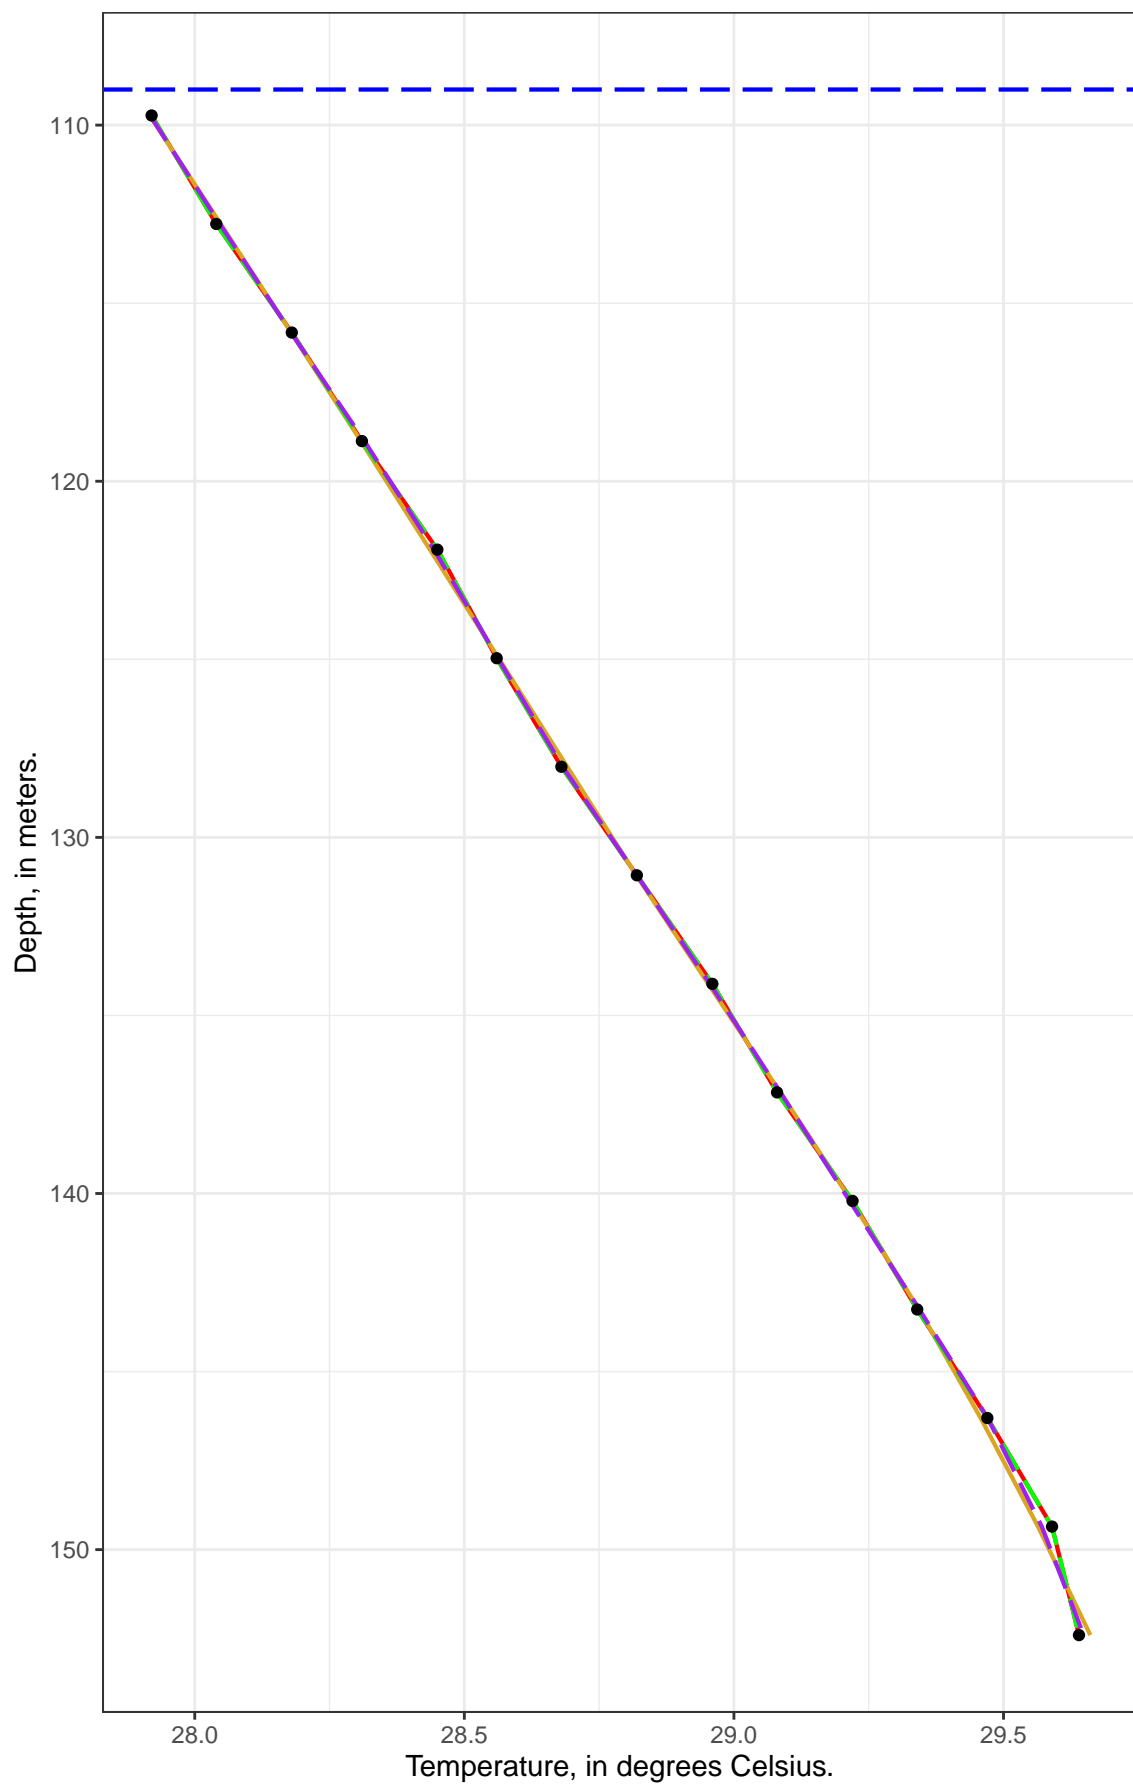

ID: 171 [H-6-78-1019\_KILBOURNE\_HOLE] First Derivative

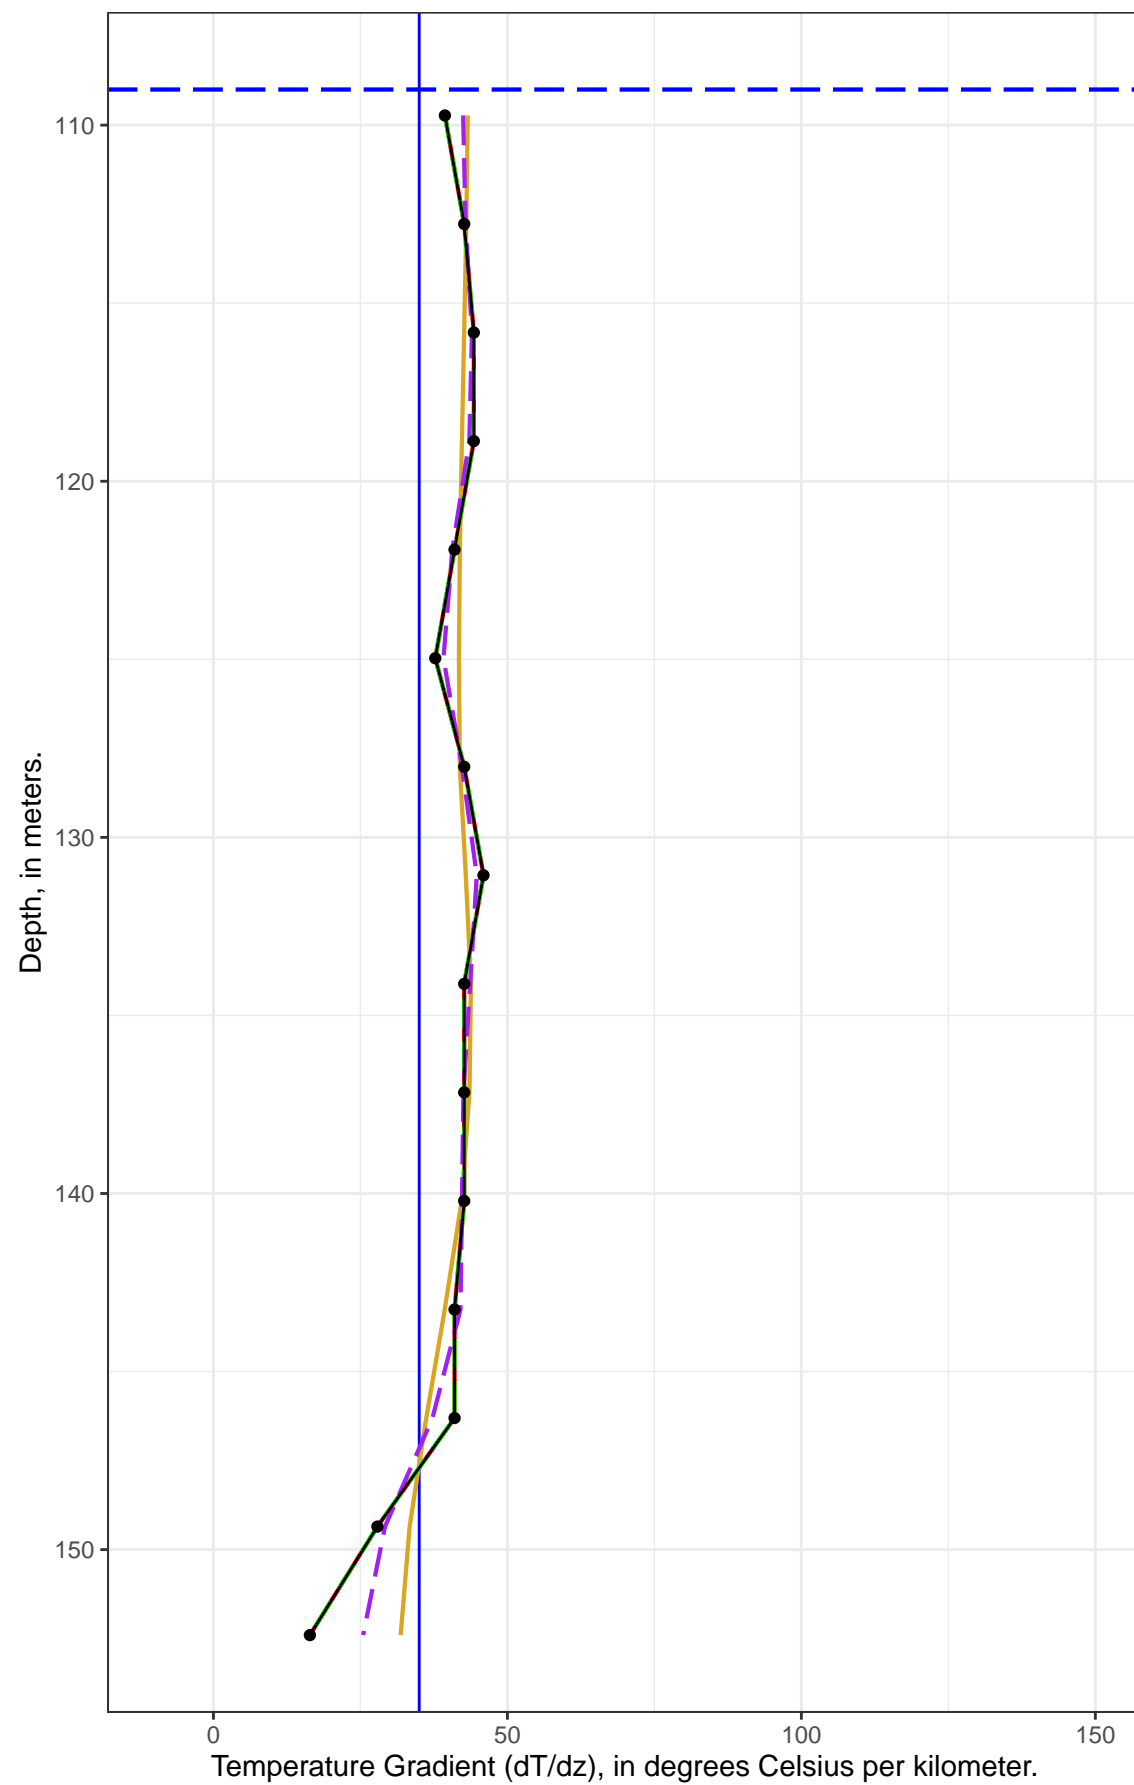

ID: 171 [H-6-78-1019\_KILBOURNE\_HOLE] Second Derivative

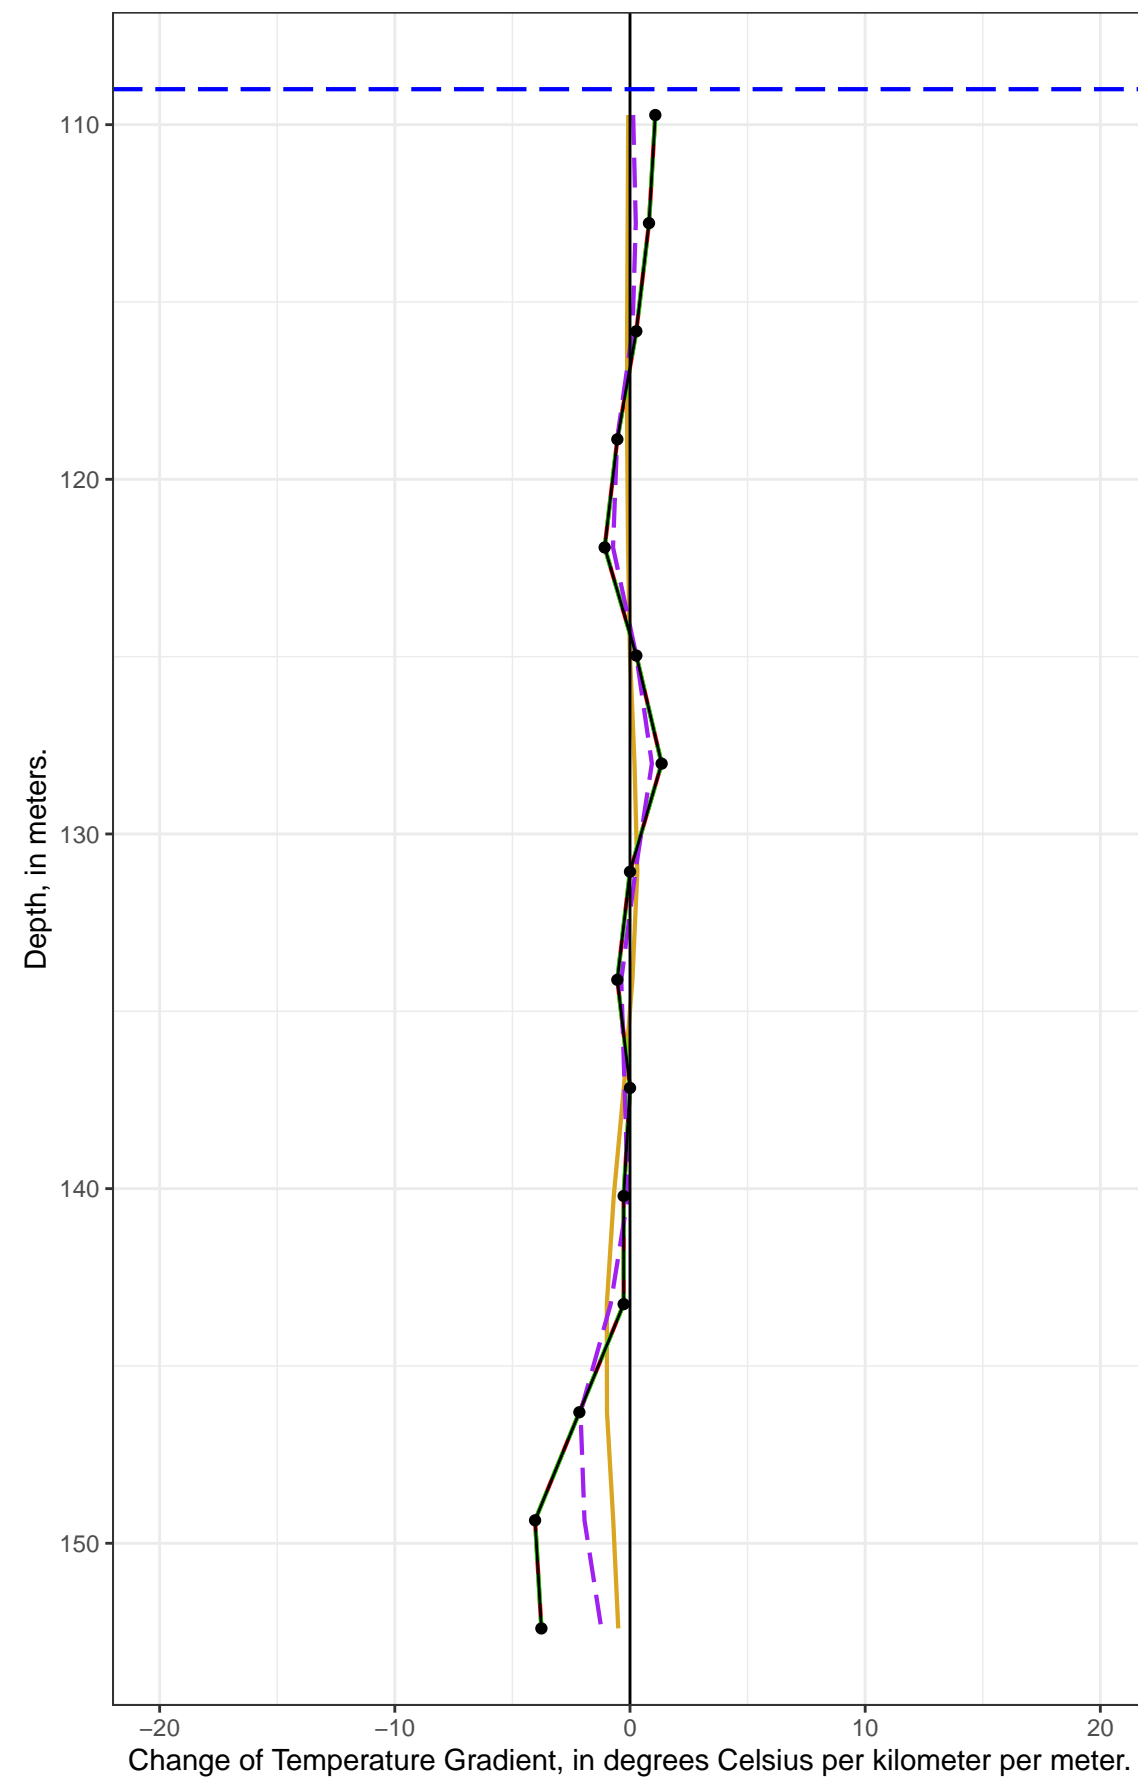

• Data — LOESS (AICC) — LOESS (constant) — LOESS (GCV) — Spline

• Data — LOESS (AICC) — LOESS (constant) — LOESS (GCV) — Spline

• Data — LOESS (AICC) — LOESS (constant) — LOESS (GCV) — Spline

ID: 172 [H-6-78-1020\_KILBOURNE\_HOLE] Smoothed Profile

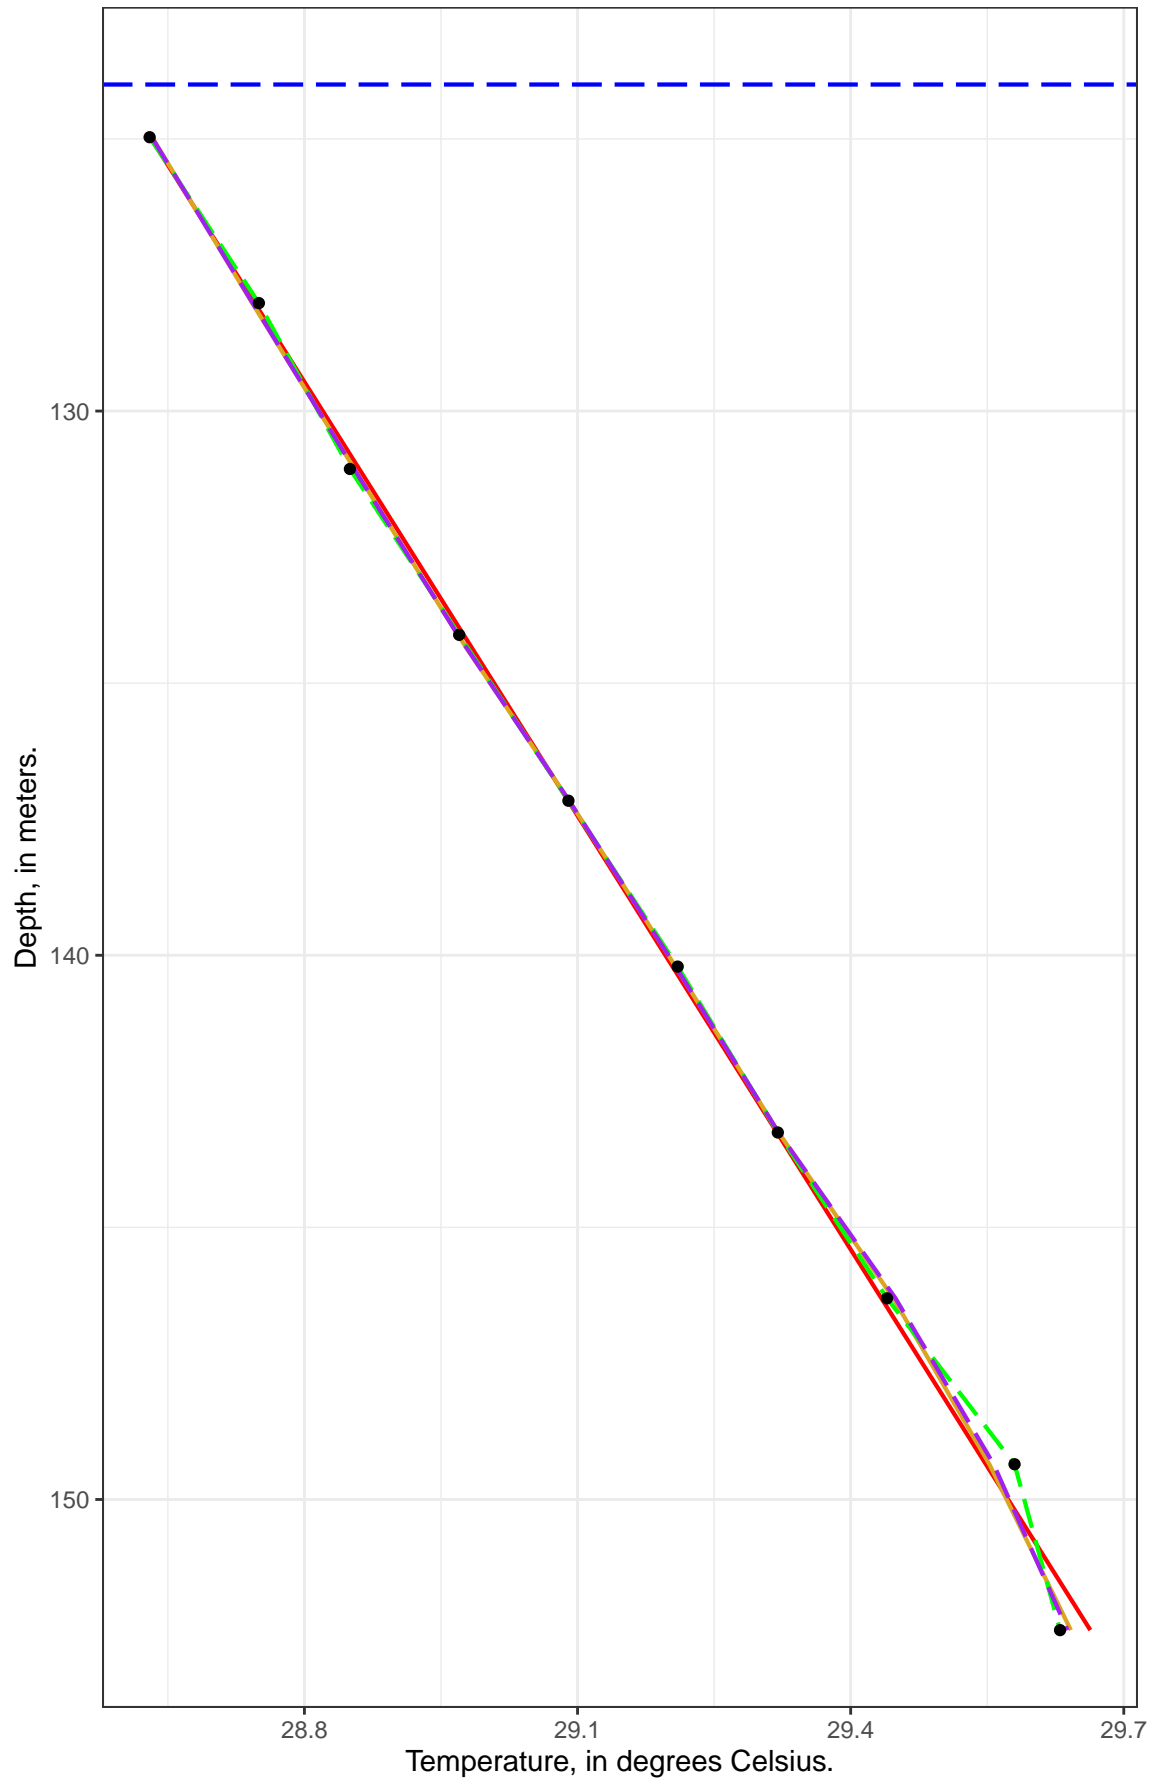

ID: 172 [H-6-78-1020\_KILBOURNE\_HOLE] First Derivative

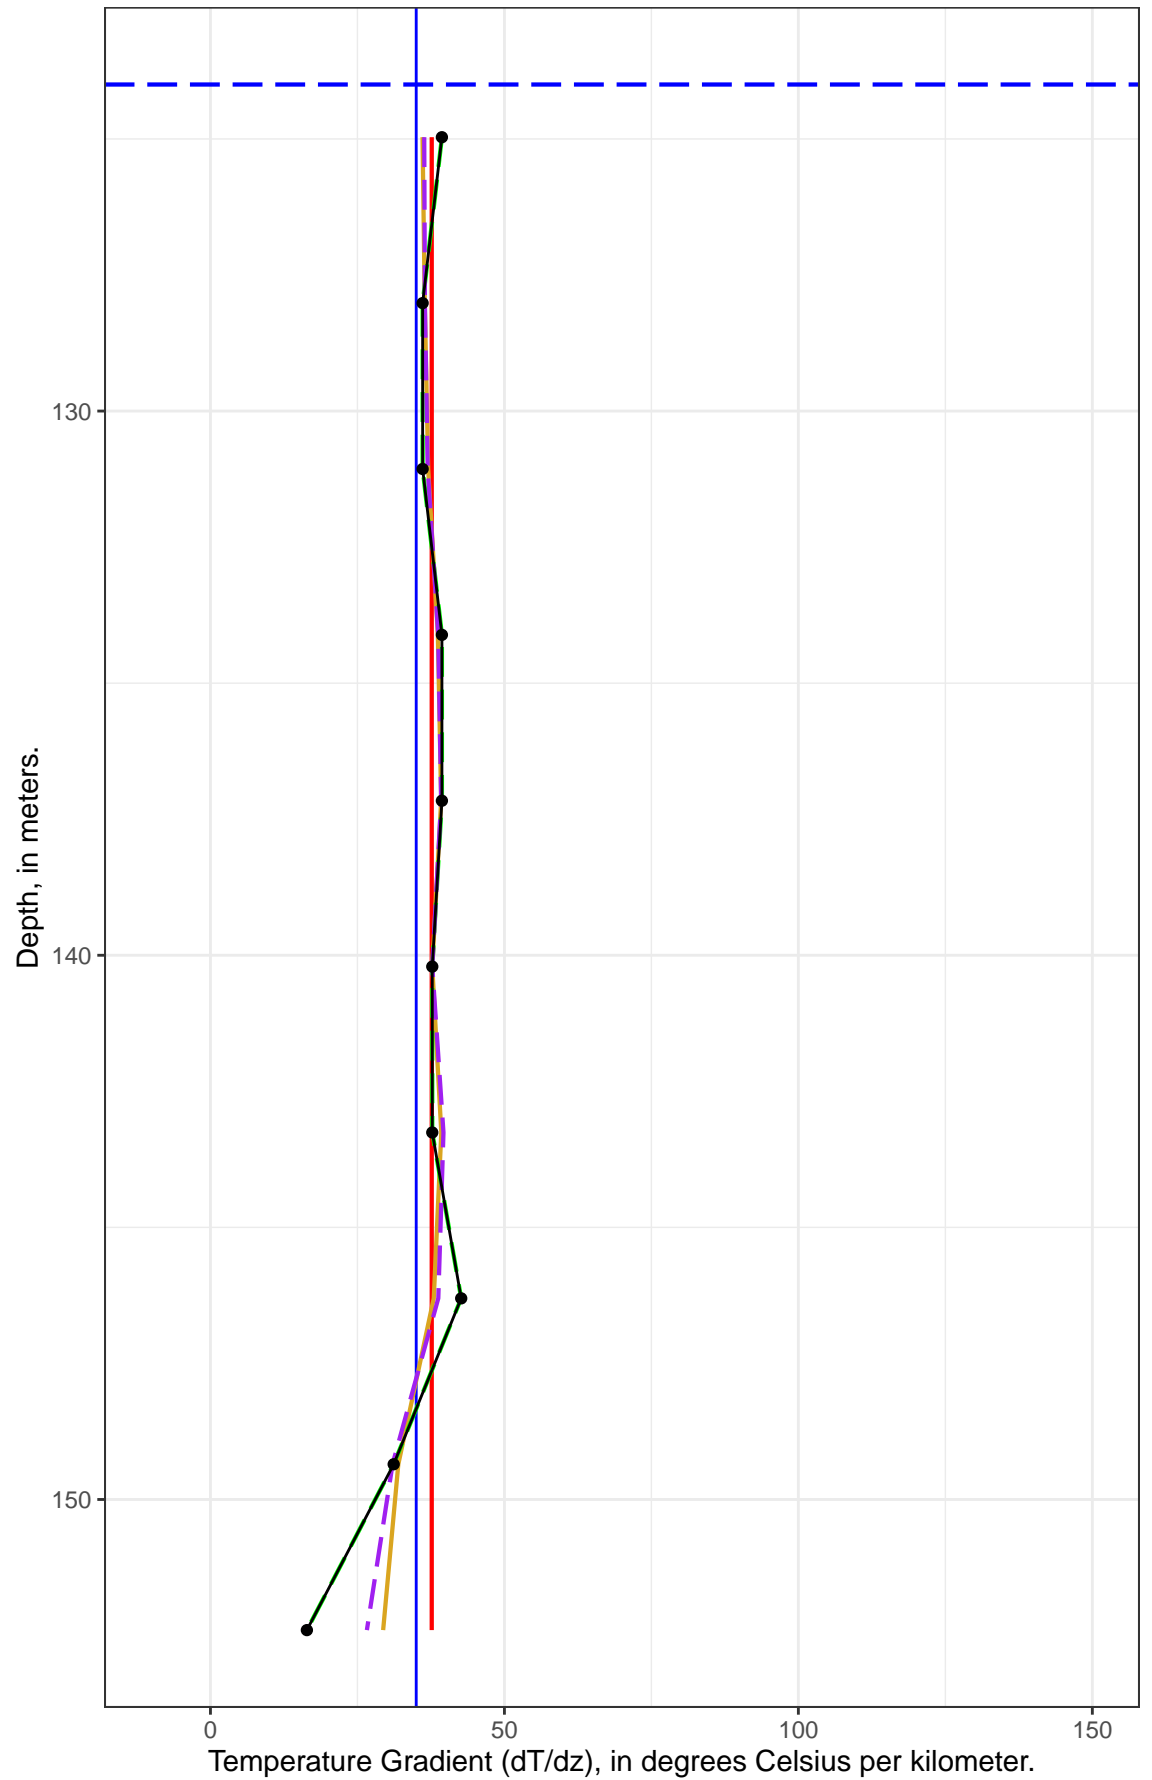

ID: 172 [H-6-78-1020\_KILBOURNE\_HOLE] Second Derivative

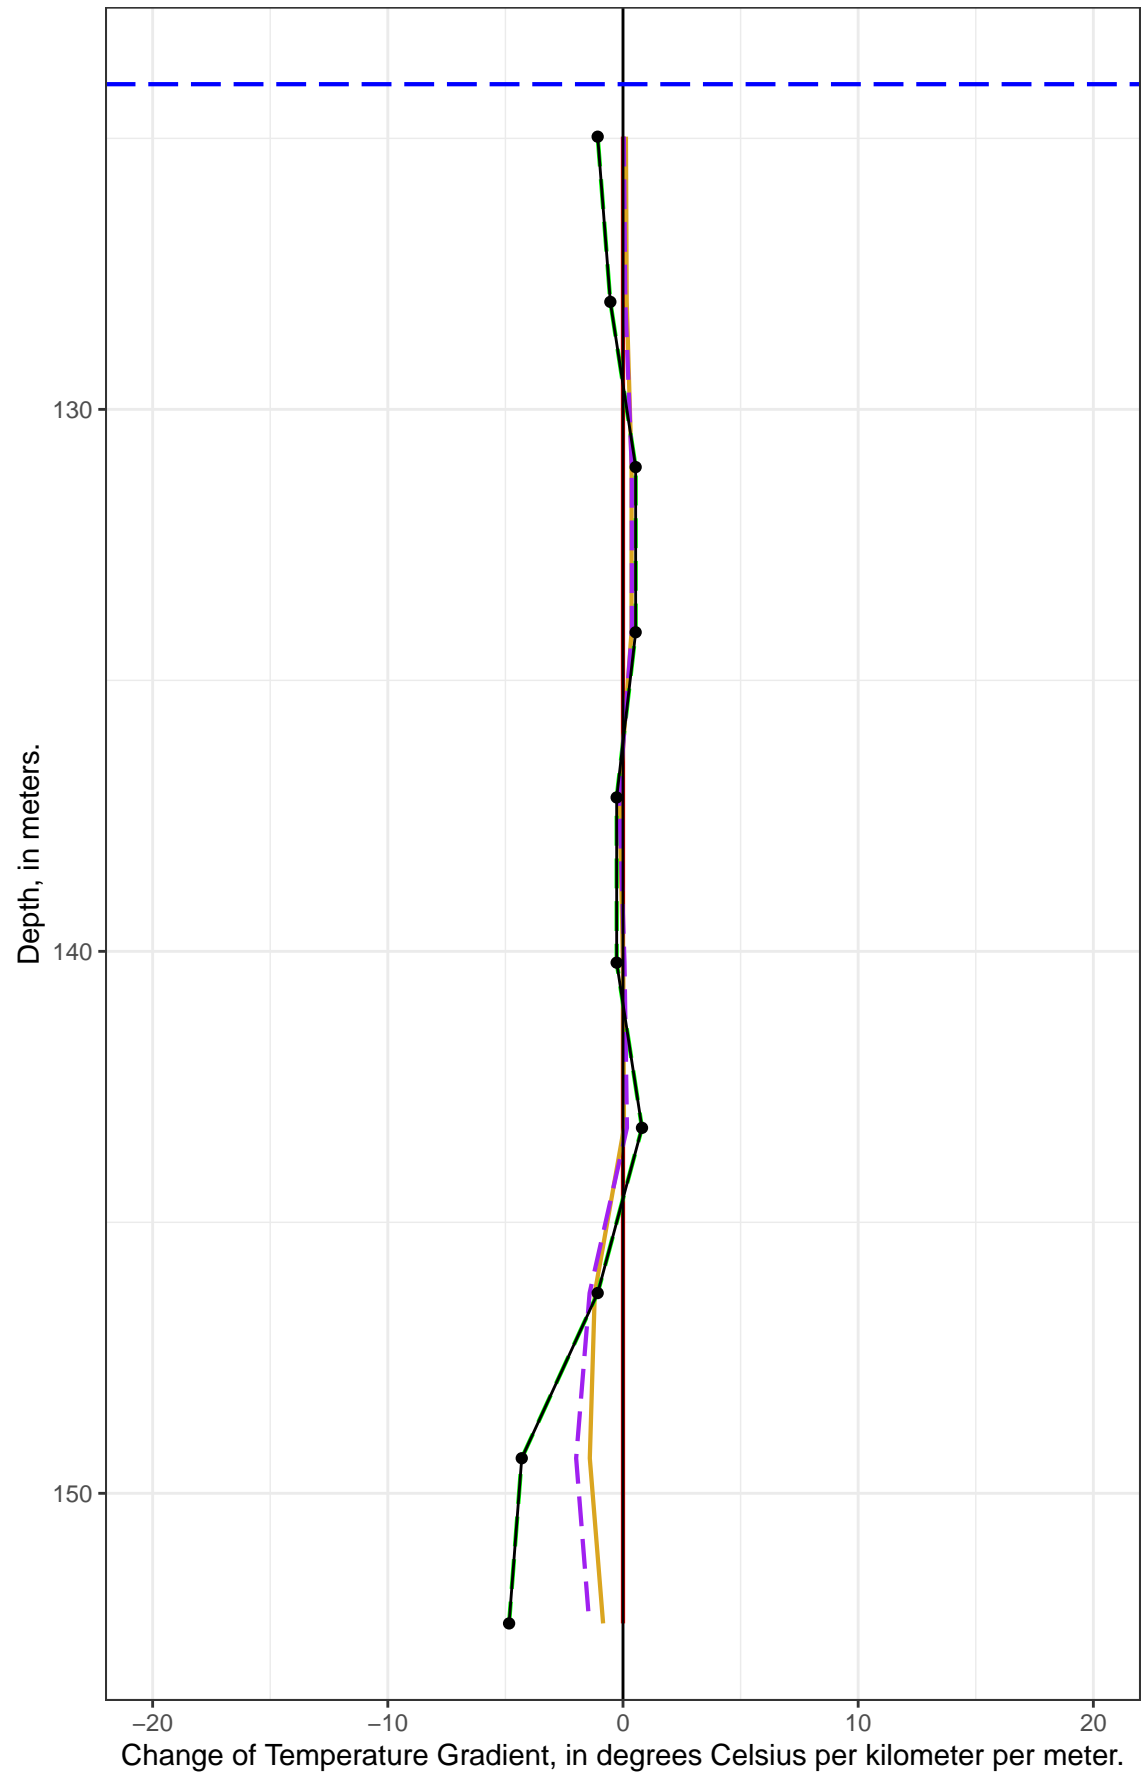

• Data — LOESS (AICC) — LOESS (constant) — LOESS (GCV) — Spline

• Data — LOESS (AICC) — LOESS (constant) — LOESS (GCV) — Spline

• Data — LOESS (AICC) — LOESS (constant) — LOESS (GCV) — Spline

ID: 173 [H-6-78-1021\_KILBOURNE\_HOLE] Smoothed Profile

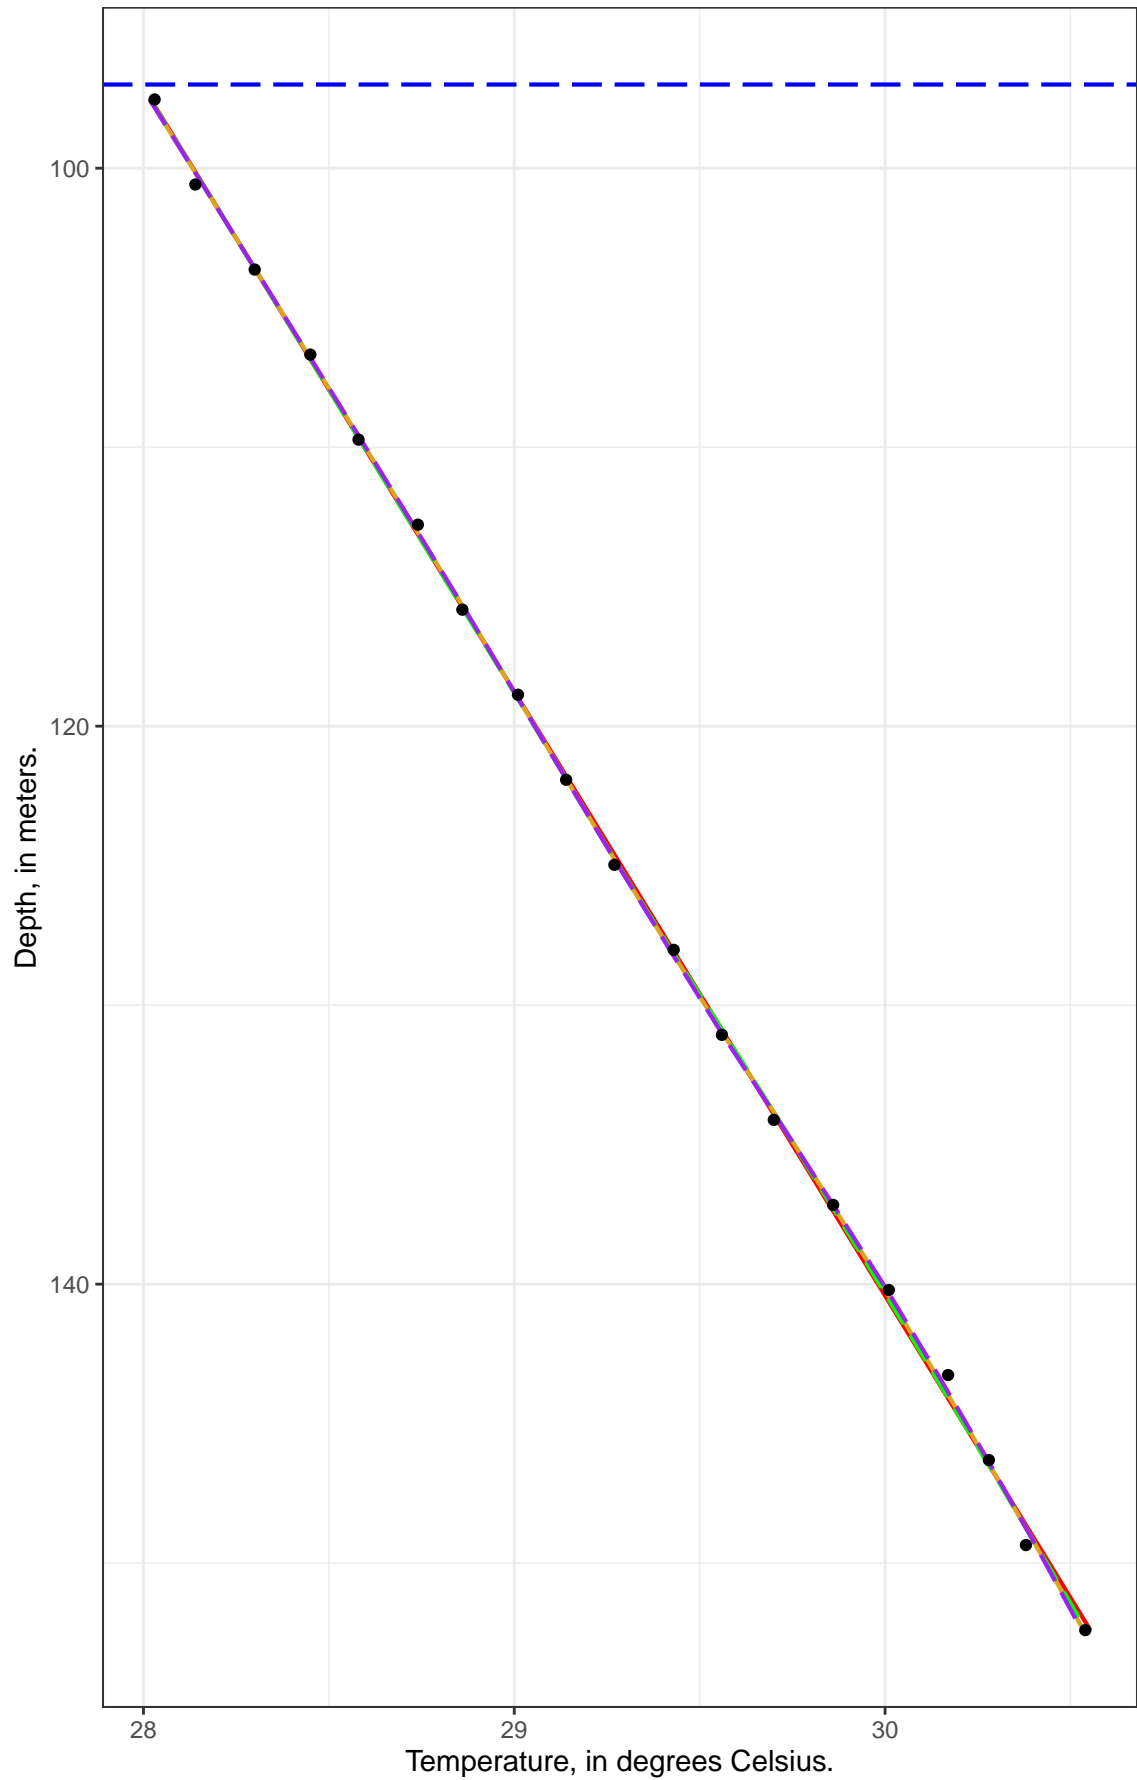

ID: 173 [H-6-78-1021\_KILBOURNE\_HOLE] First Derivative

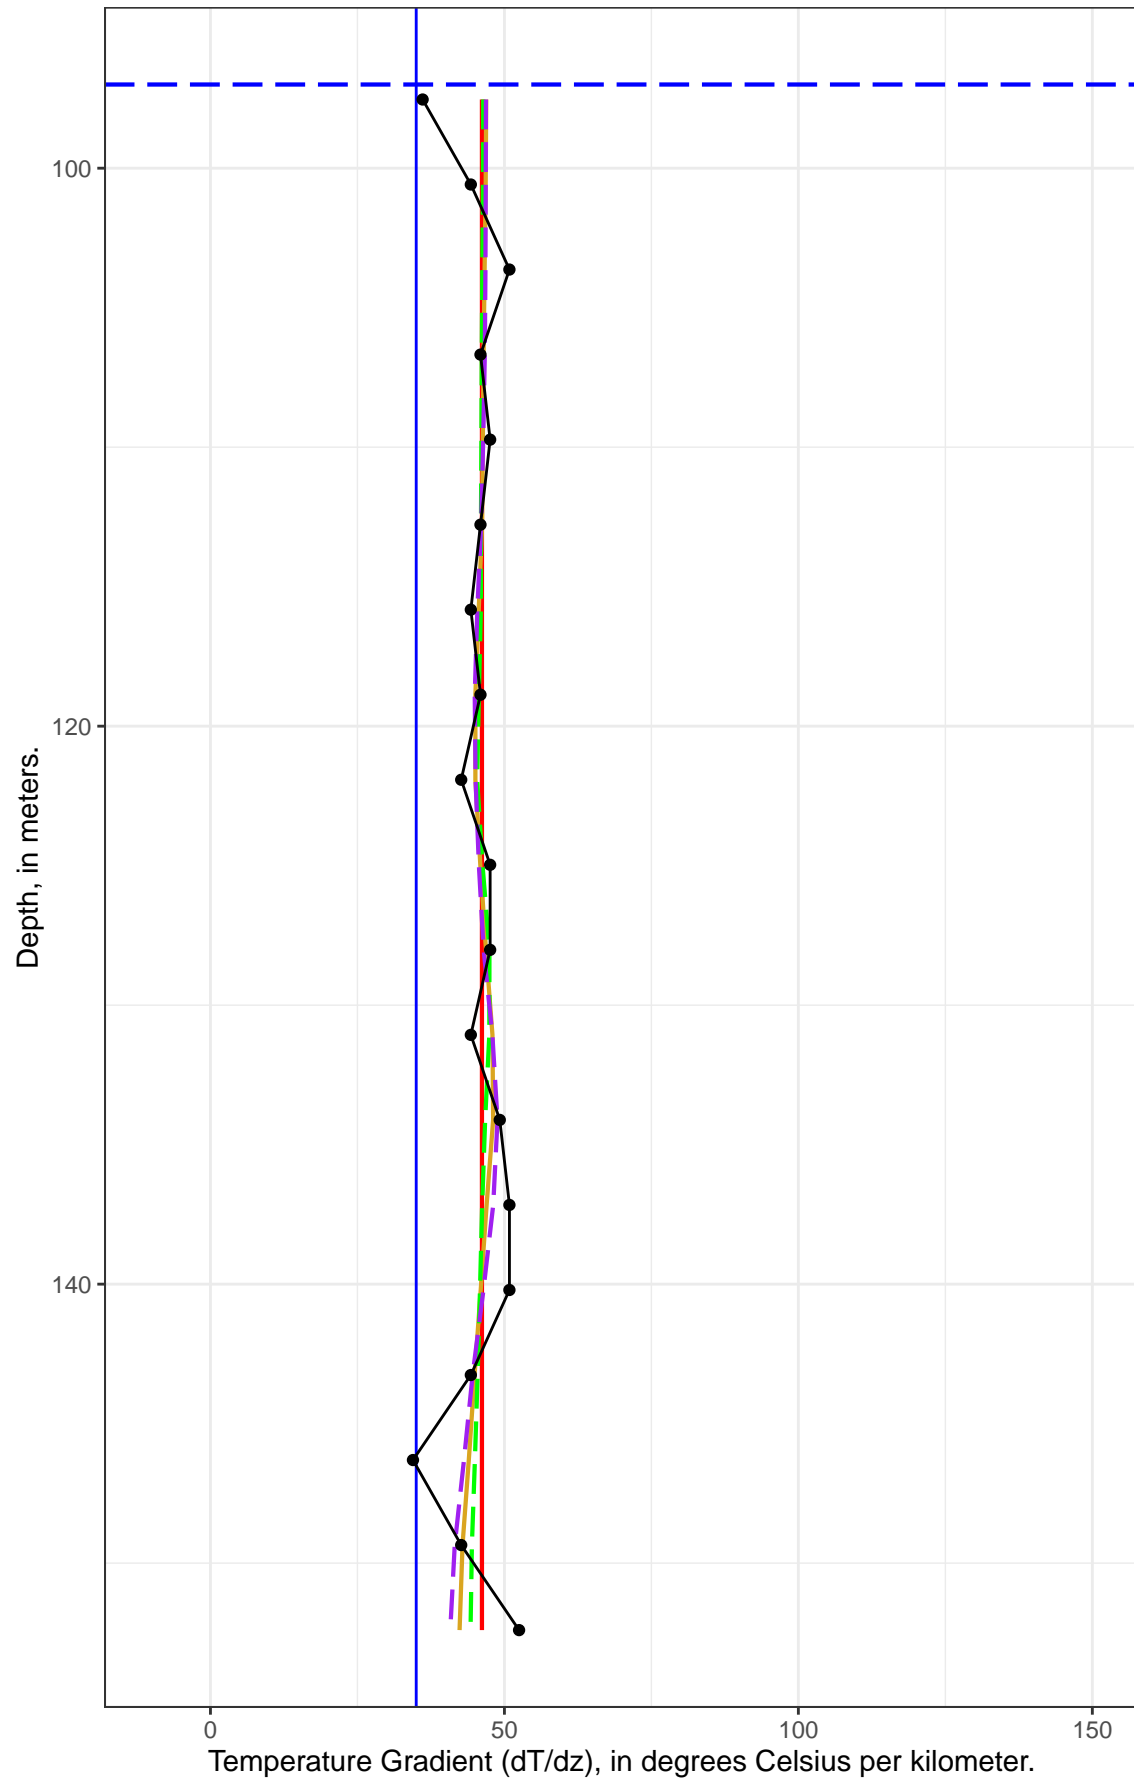

ID: 173 [H-6-78-1021\_KILBOURNE\_HOLE] Second Derivative

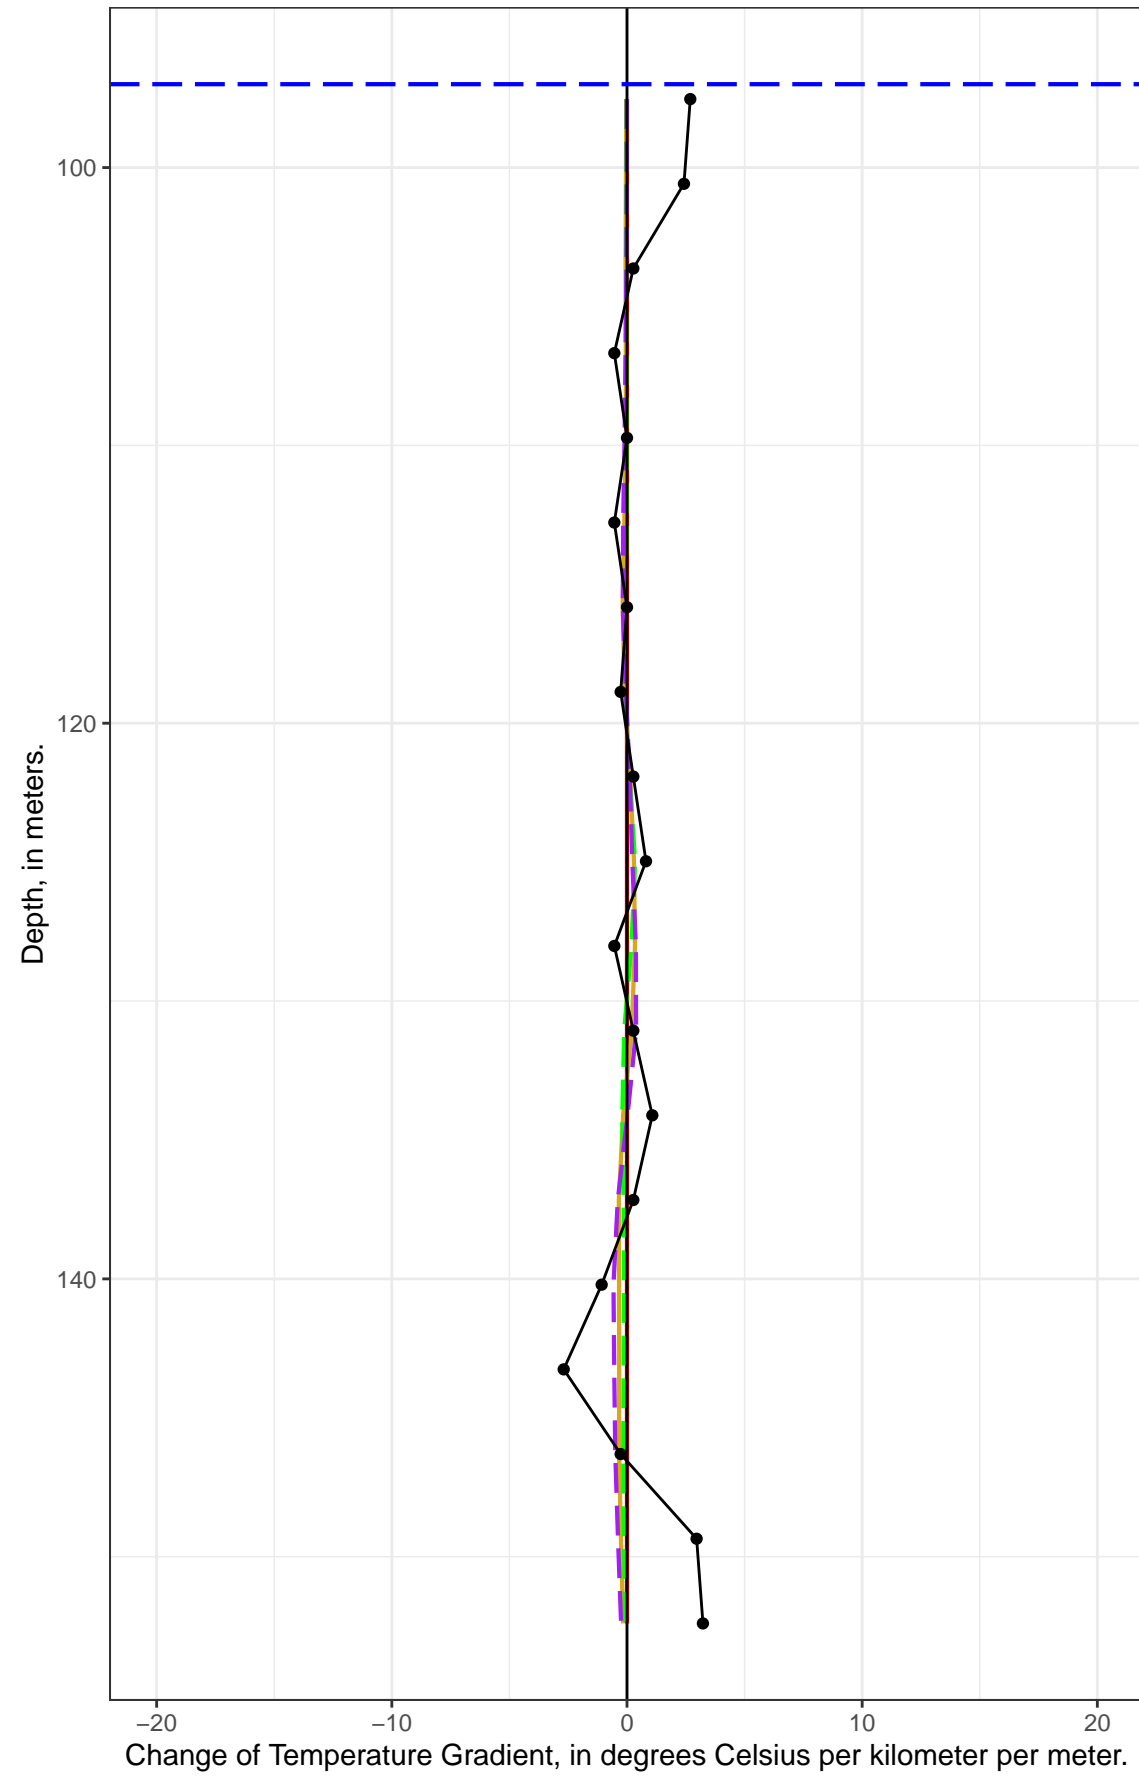

• Data • LOESS (AICC) • LOESS (constant) • LOESS (GCV) • Spline

• Data • LOESS (AICC) • LOESS (constant) • LOESS (GCV) • Spline

• Data • LOESS (AICC) • LOESS (constant) • LOESS (GCV) • Spline

ID: 174 [H-6-78-1023\_KILBOURNE\_HOLE] Smoothed Profile

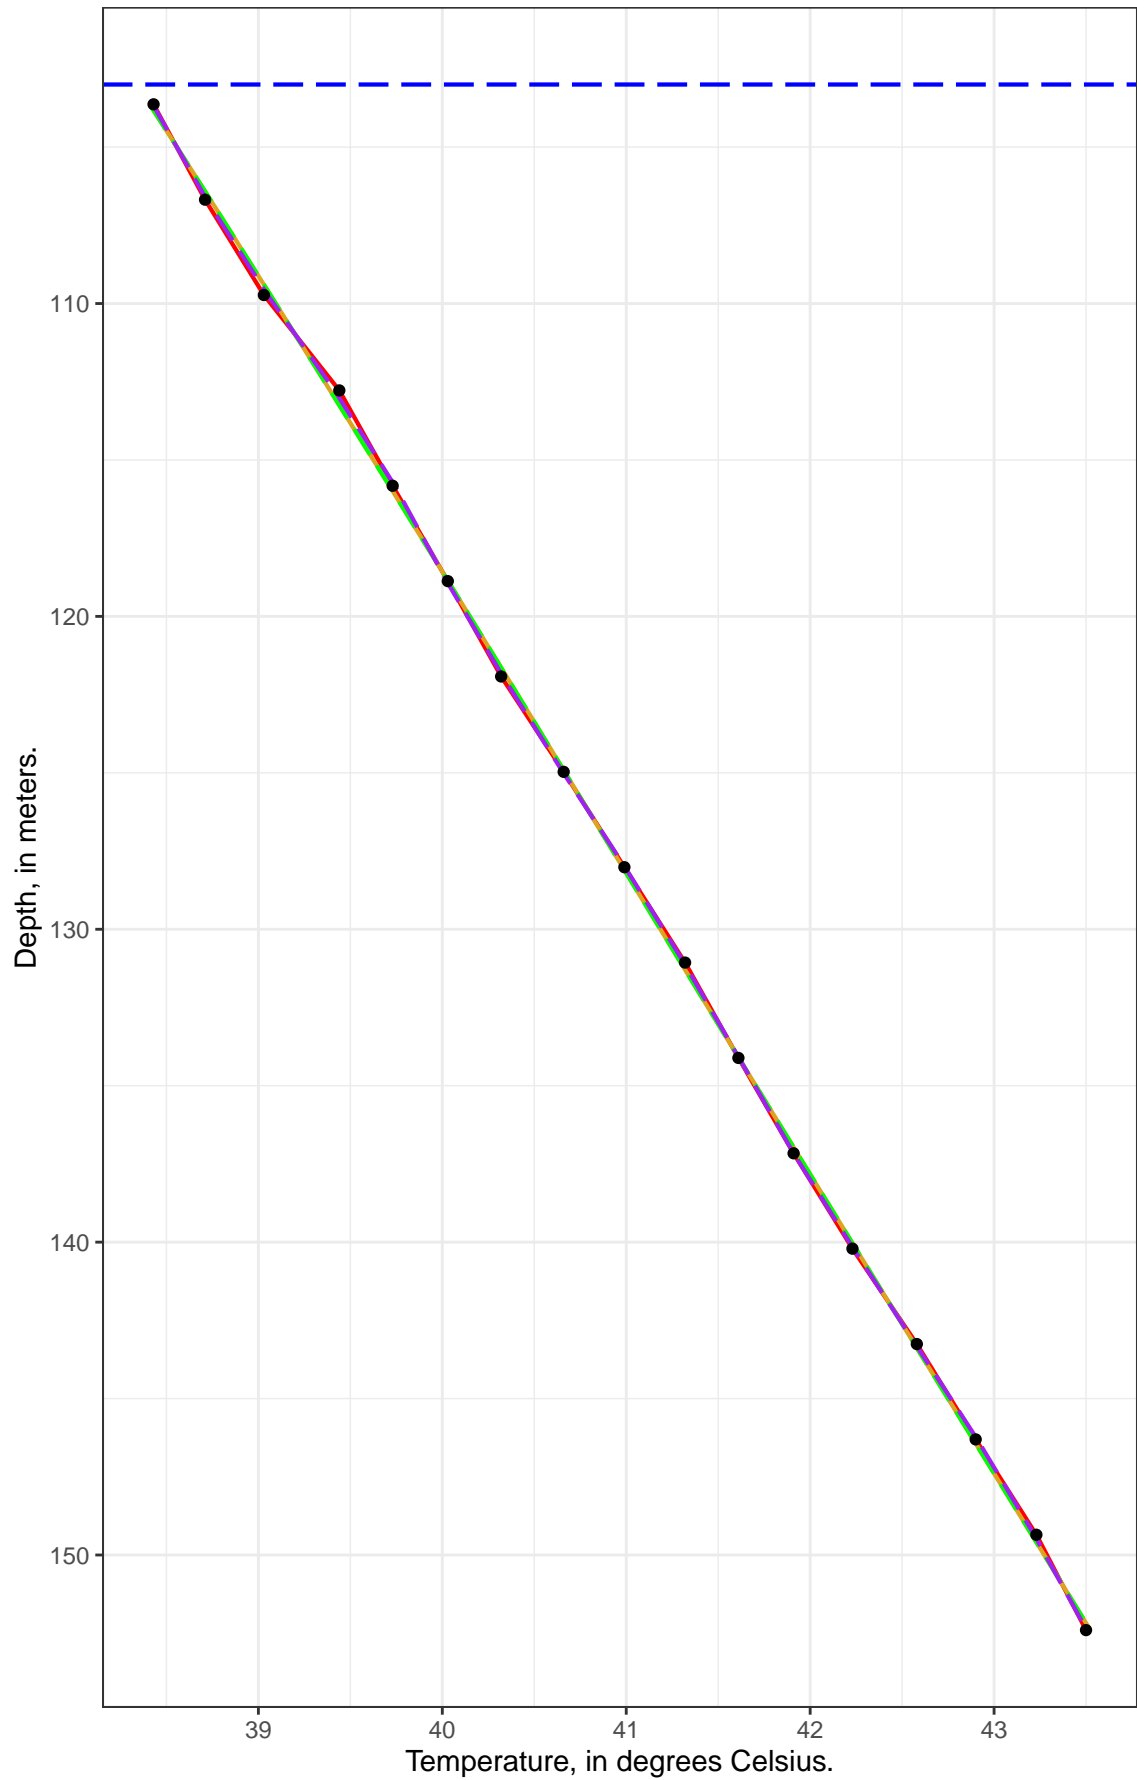

ID: 174 [H-6-78-1023\_KILBOURNE\_HOLE] First Derivative

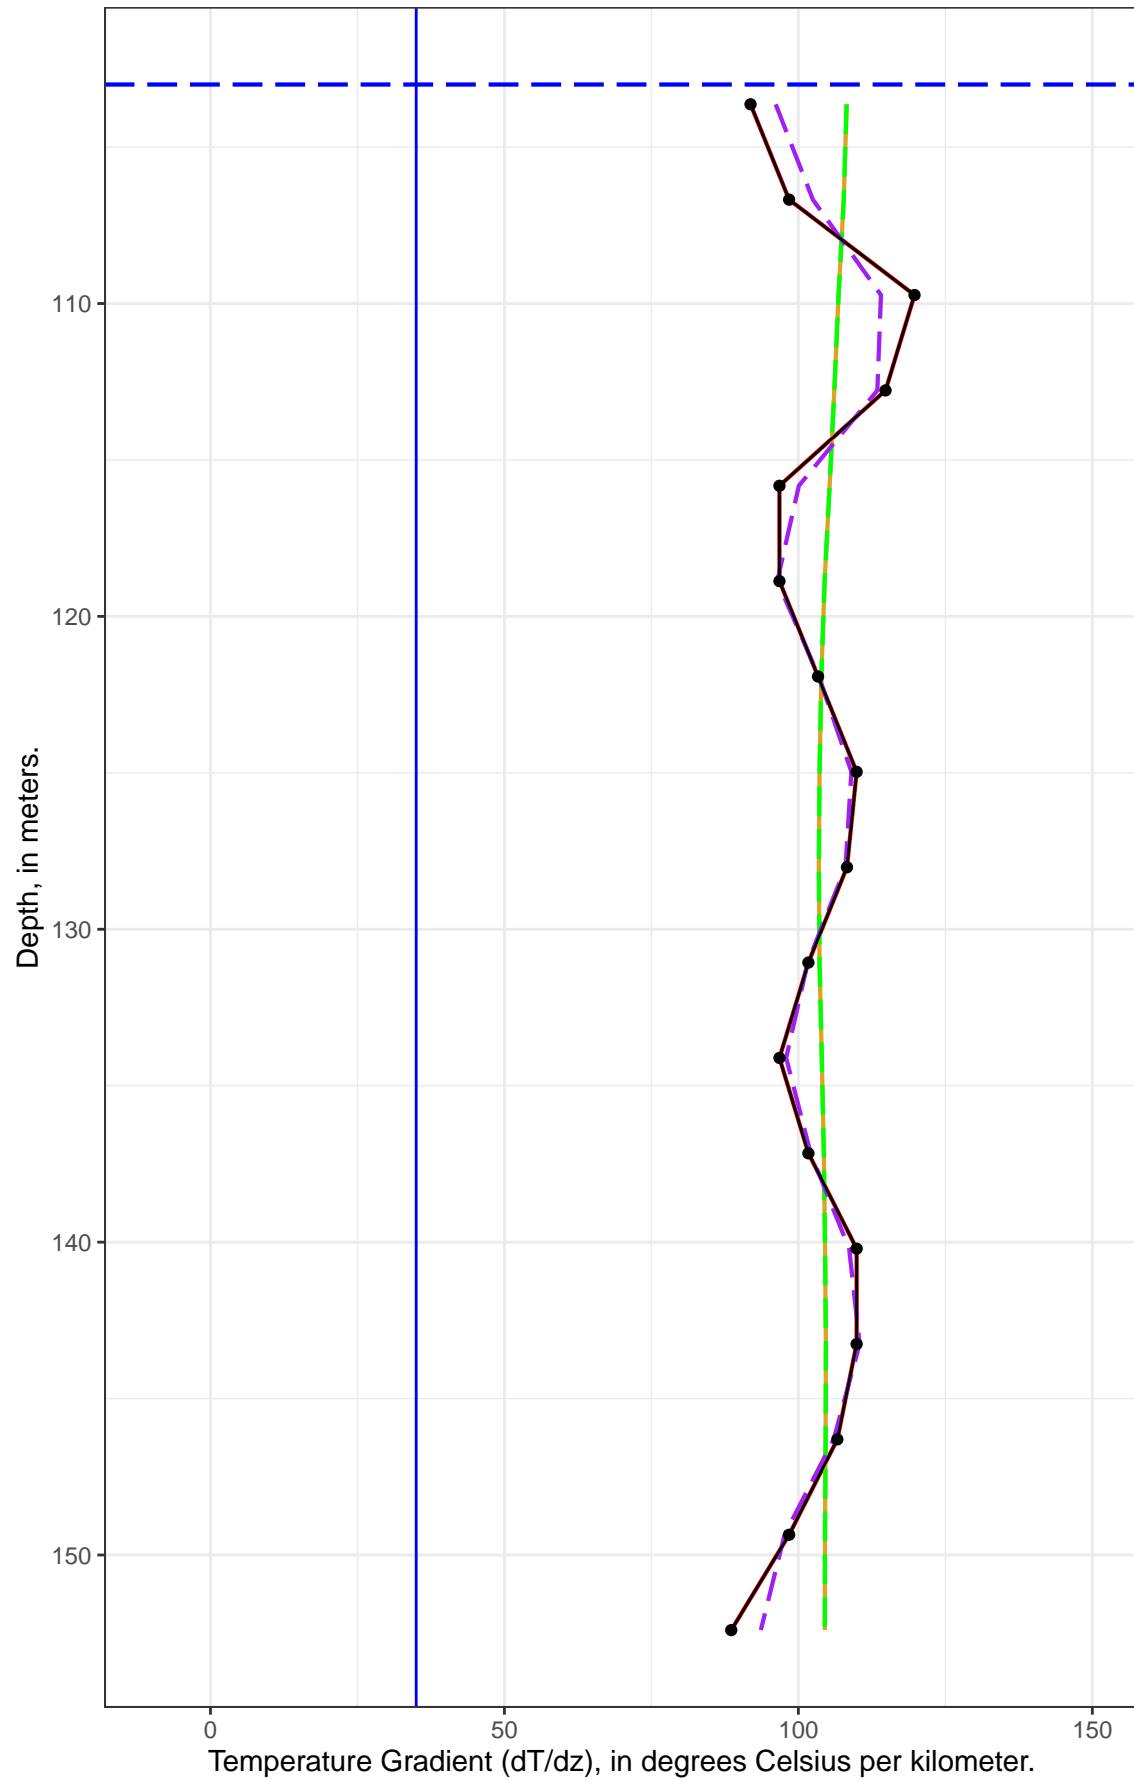

ID: 174 [H-6-78-1023\_KILBOURNE\_HOLE] Second Derivative

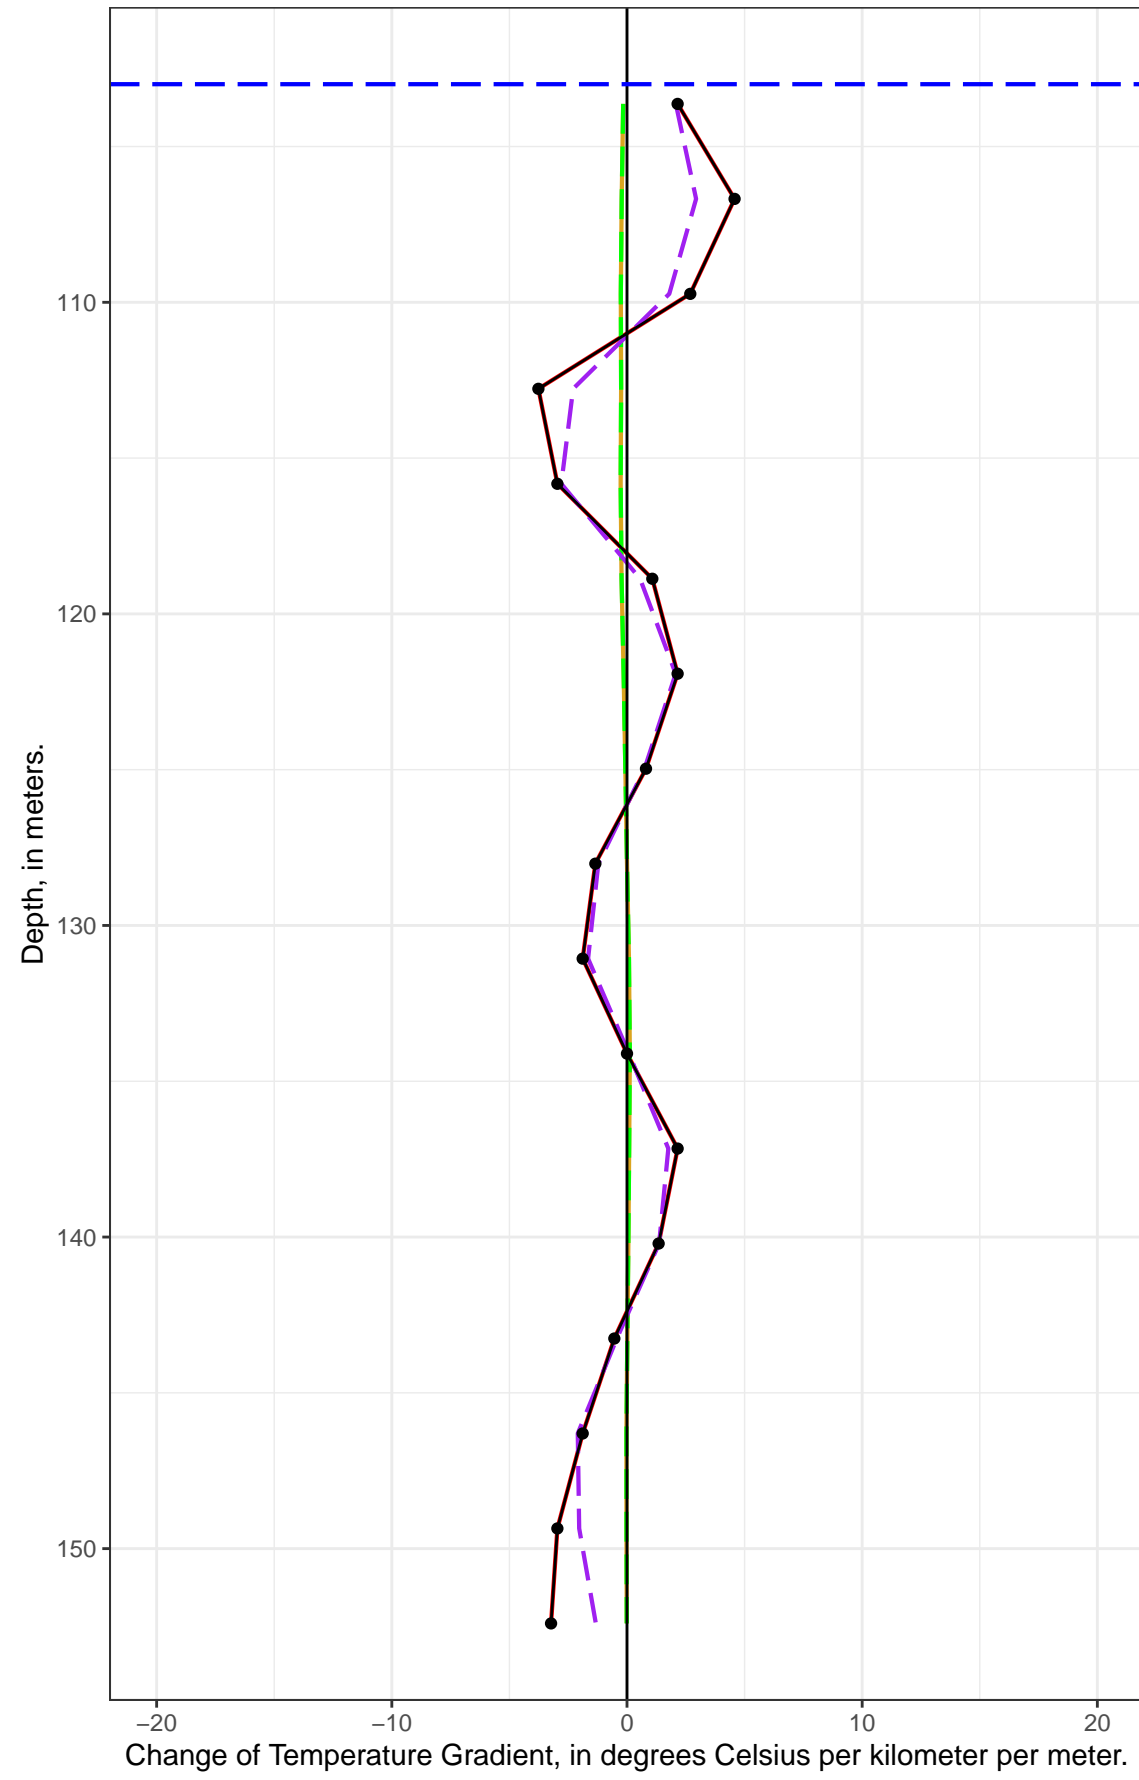

• Data — LOESS (AICC) — LOESS (constant) — LOESS (GCV) — Spline

• Data — LOESS (AICC) — LOESS (constant) — LOESS (GCV) — Spline

• Data — LOESS (AICC) — LOESS (constant) — LOESS (GCV) — Spline

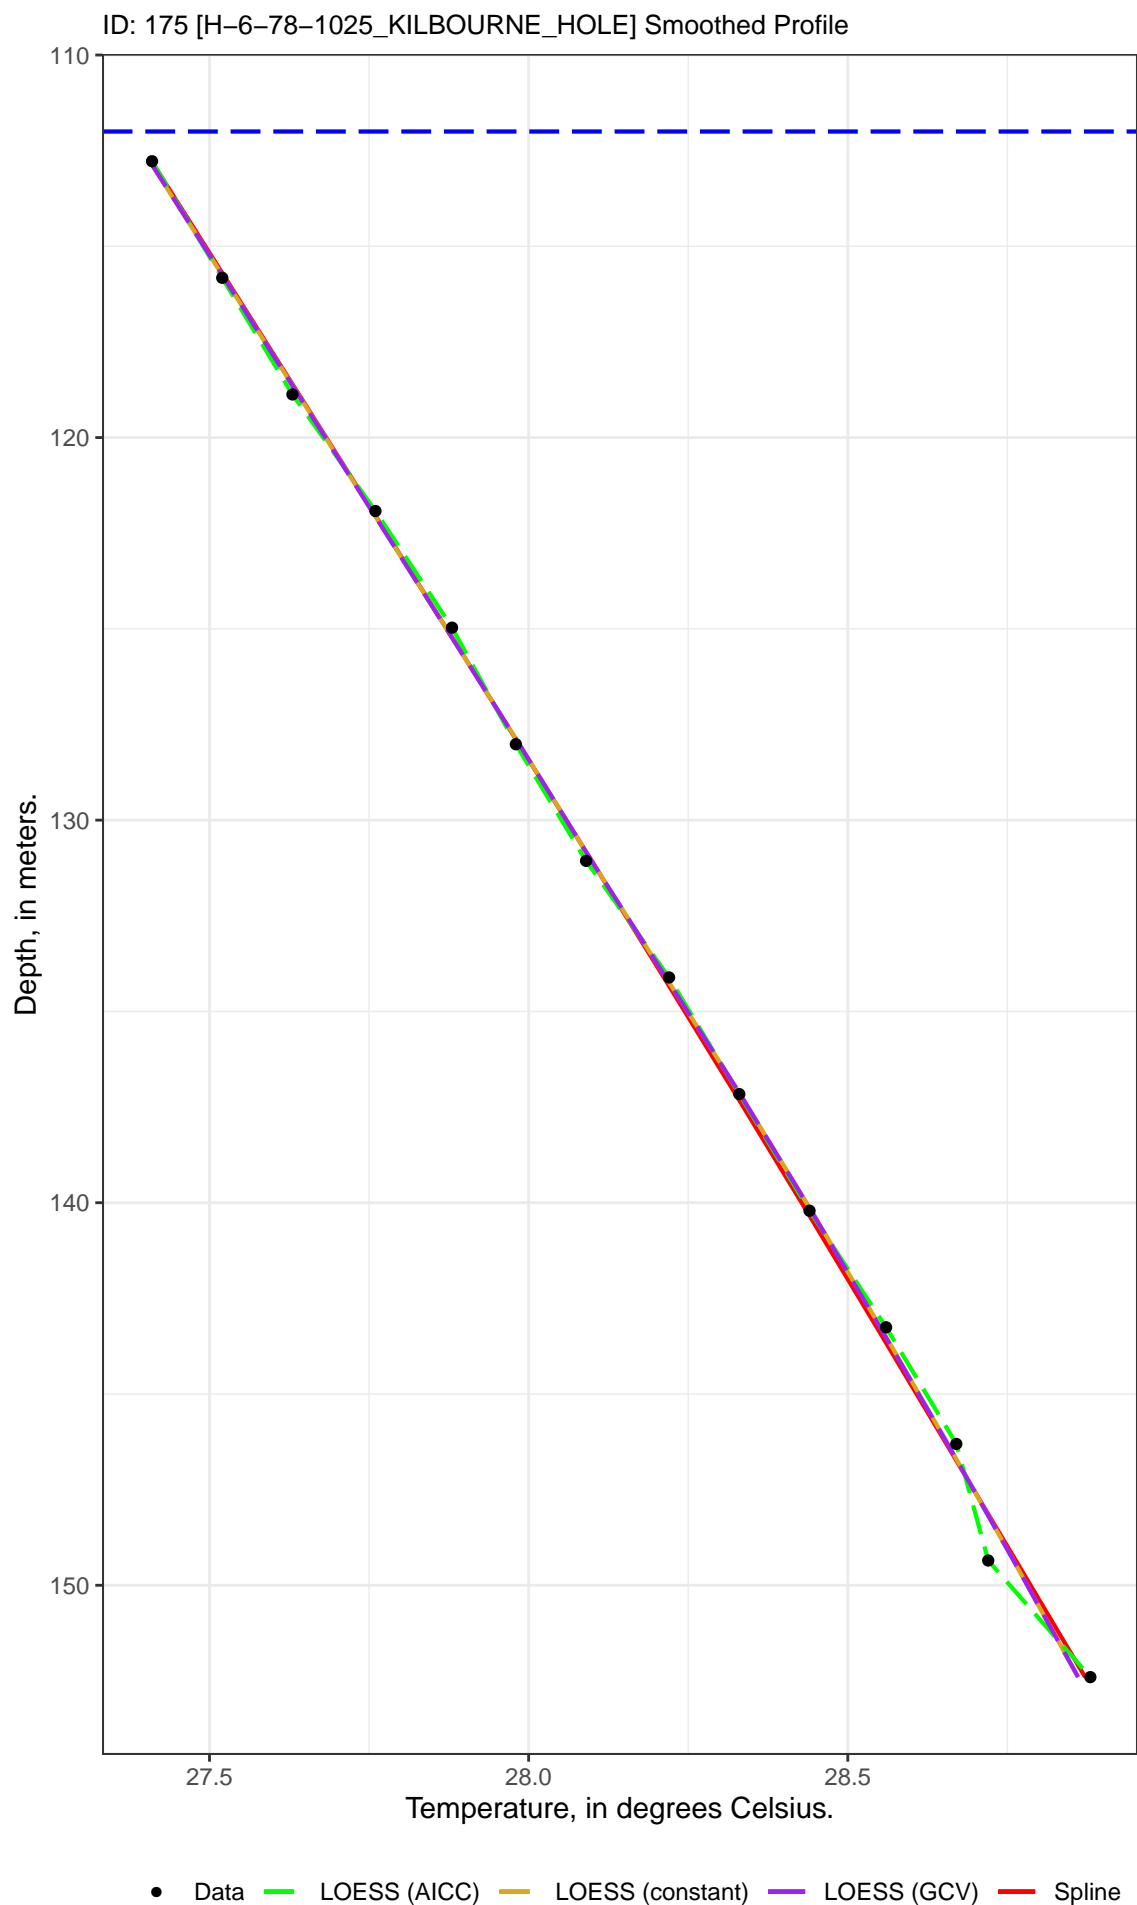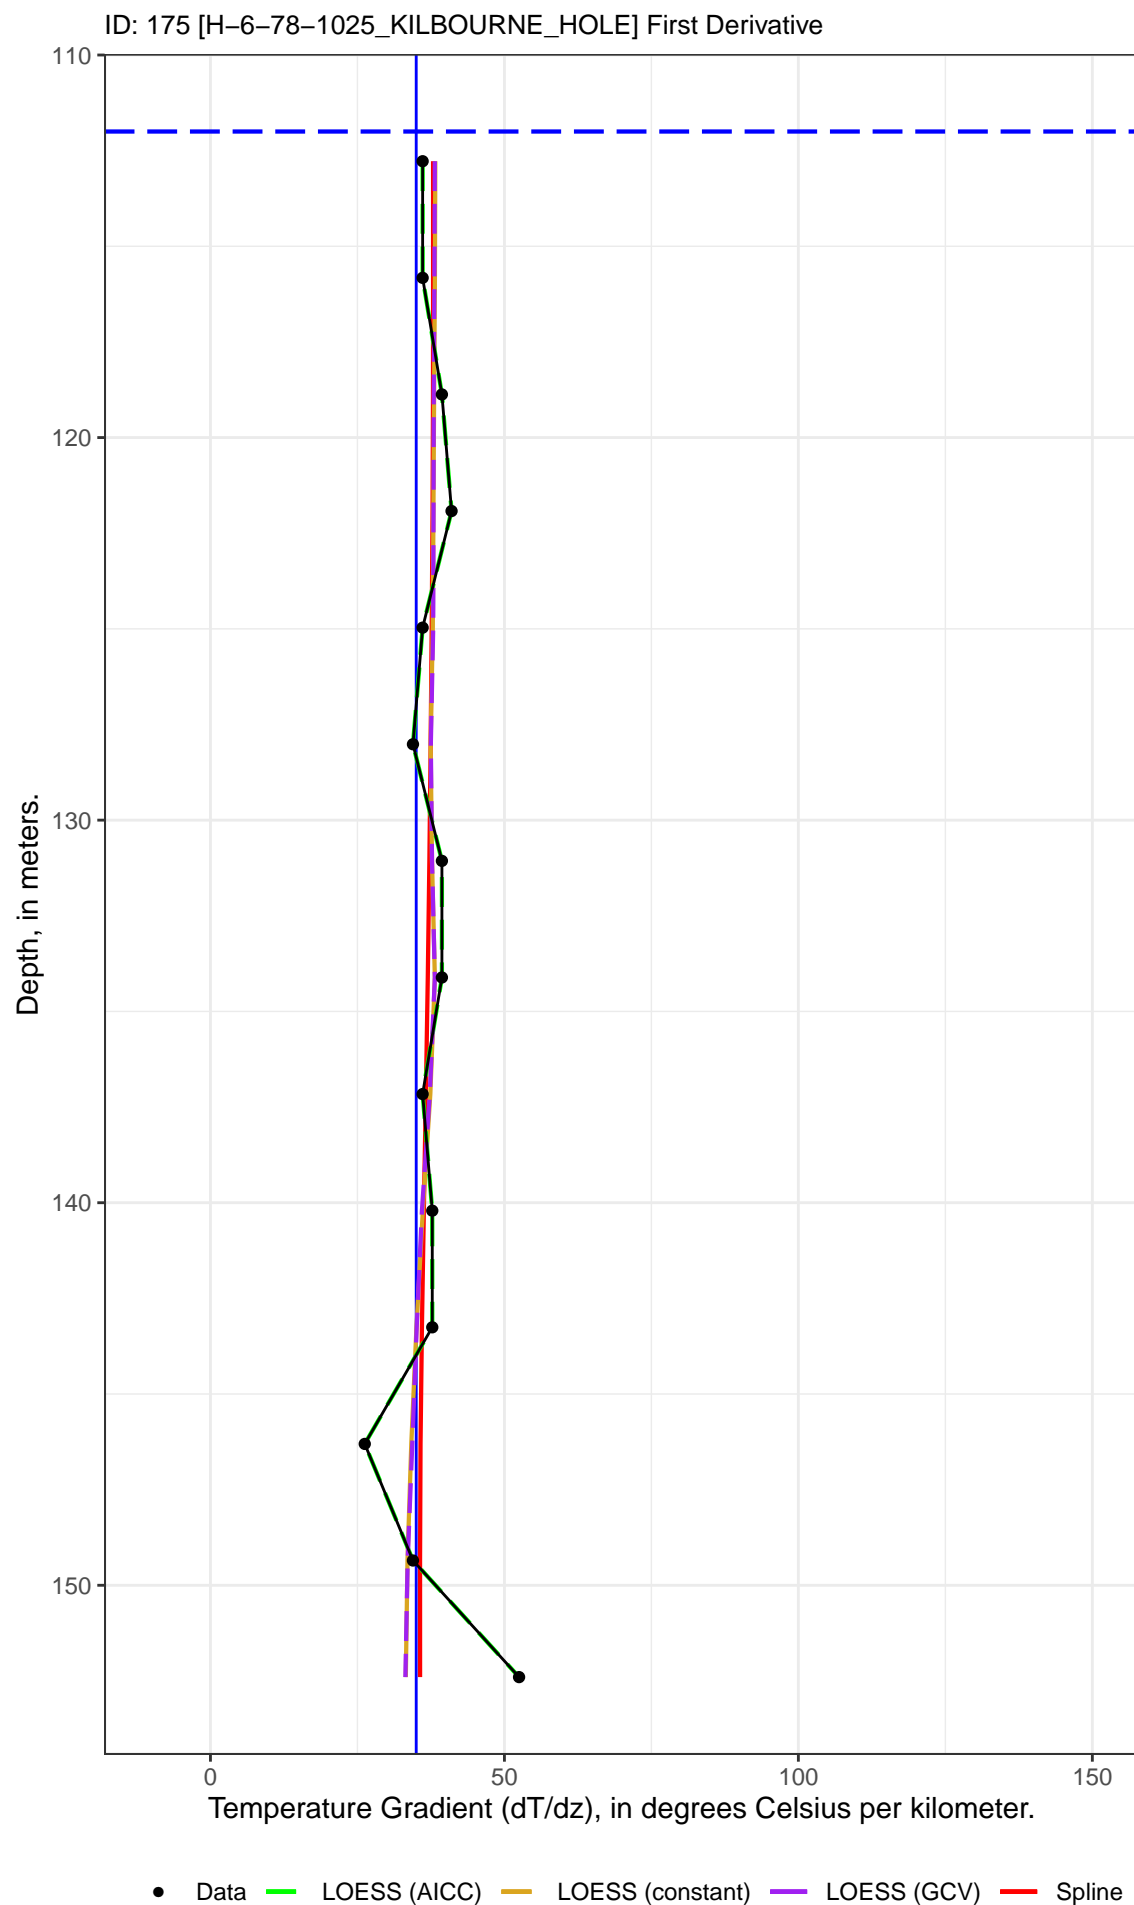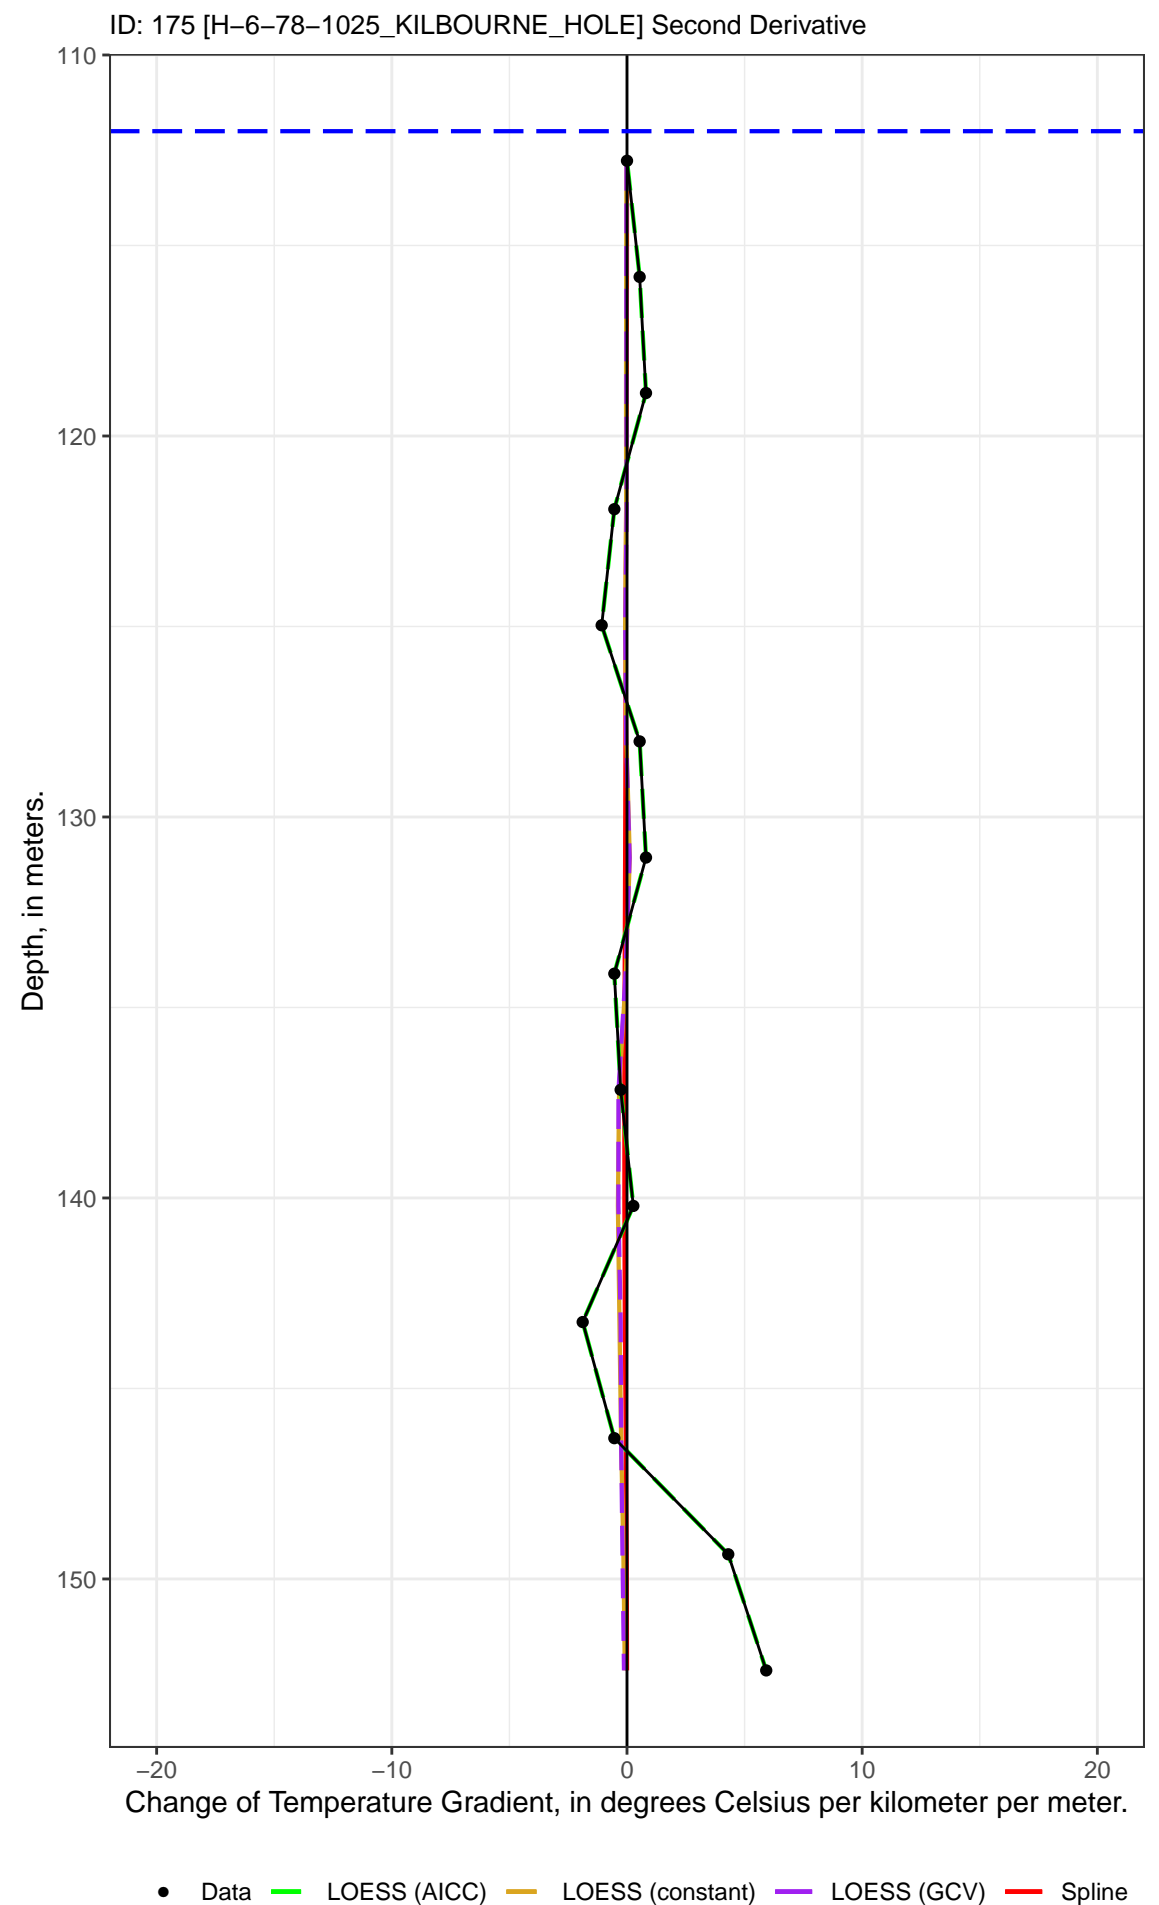

ID: 176 [H-6-78-1027\_KILBOURNE\_HOLE] Smoothed Profile

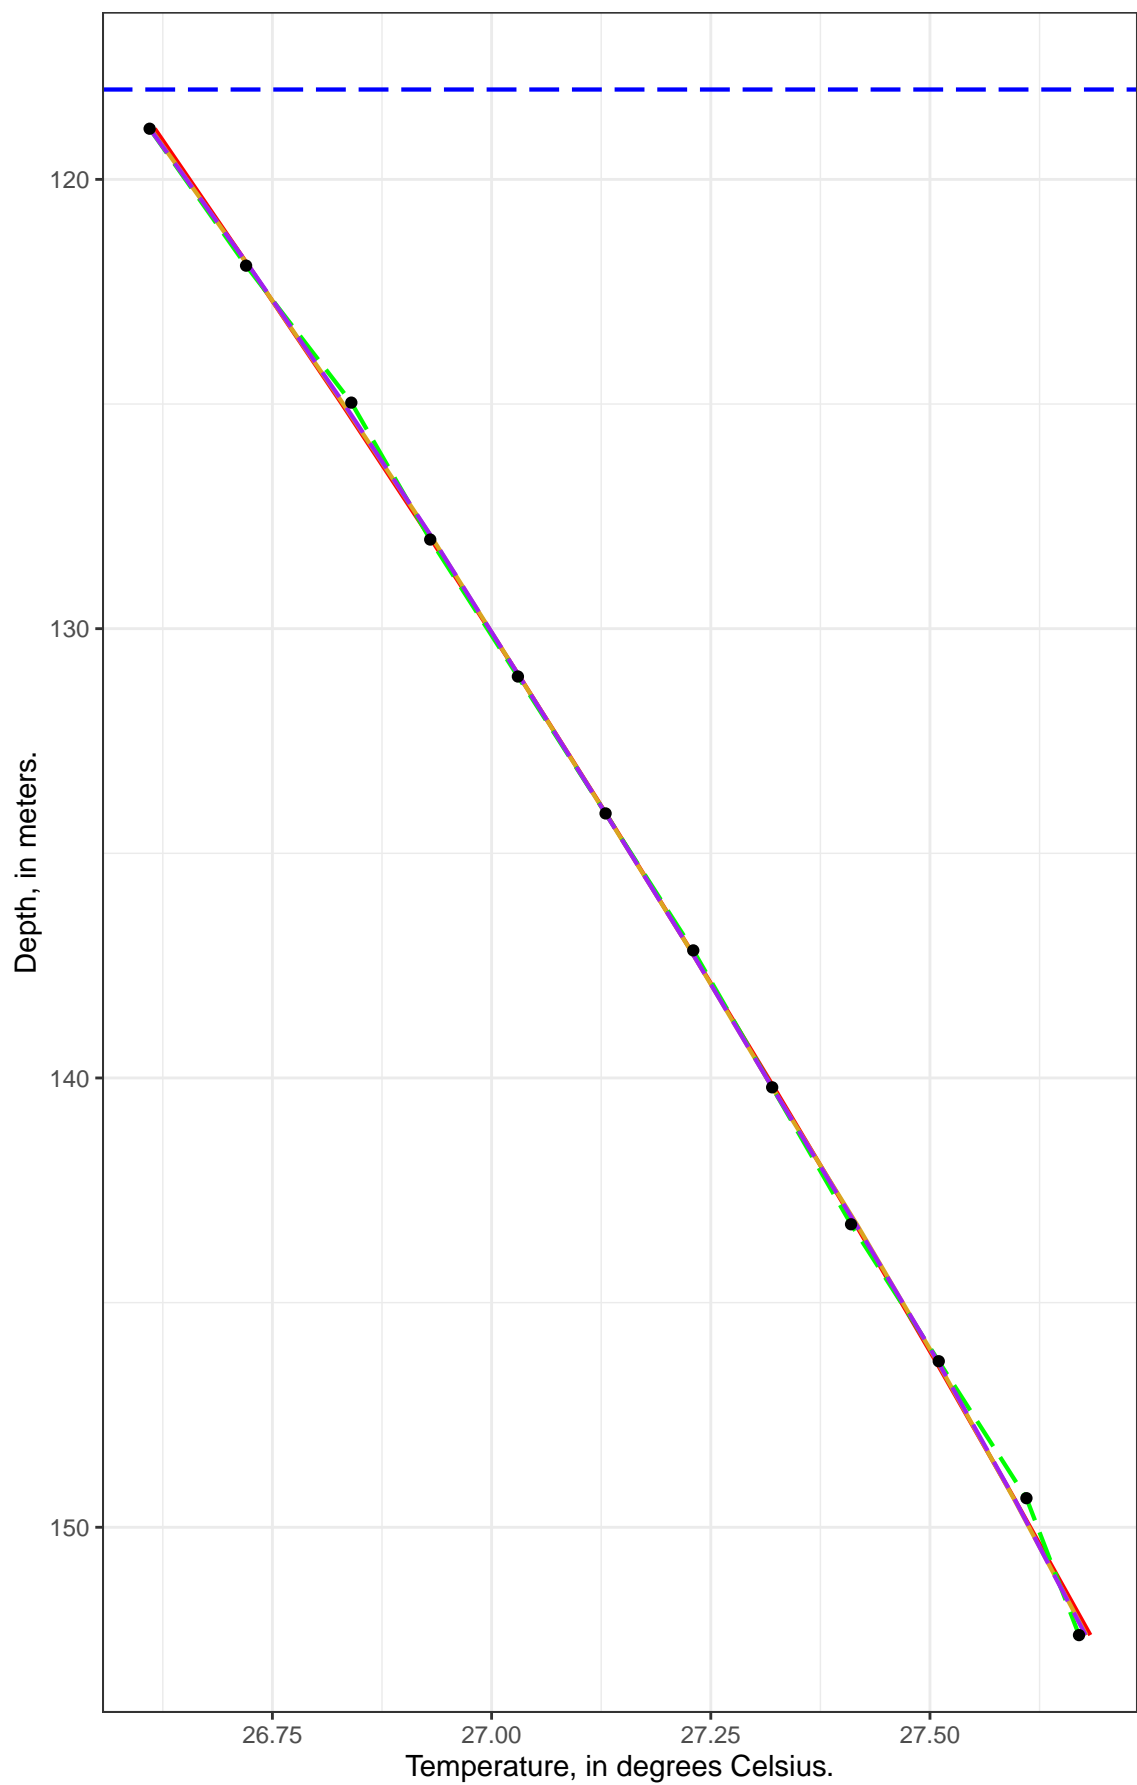

ID: 176 [H-6-78-1027\_KILBOURNE\_HOLE] First Derivative

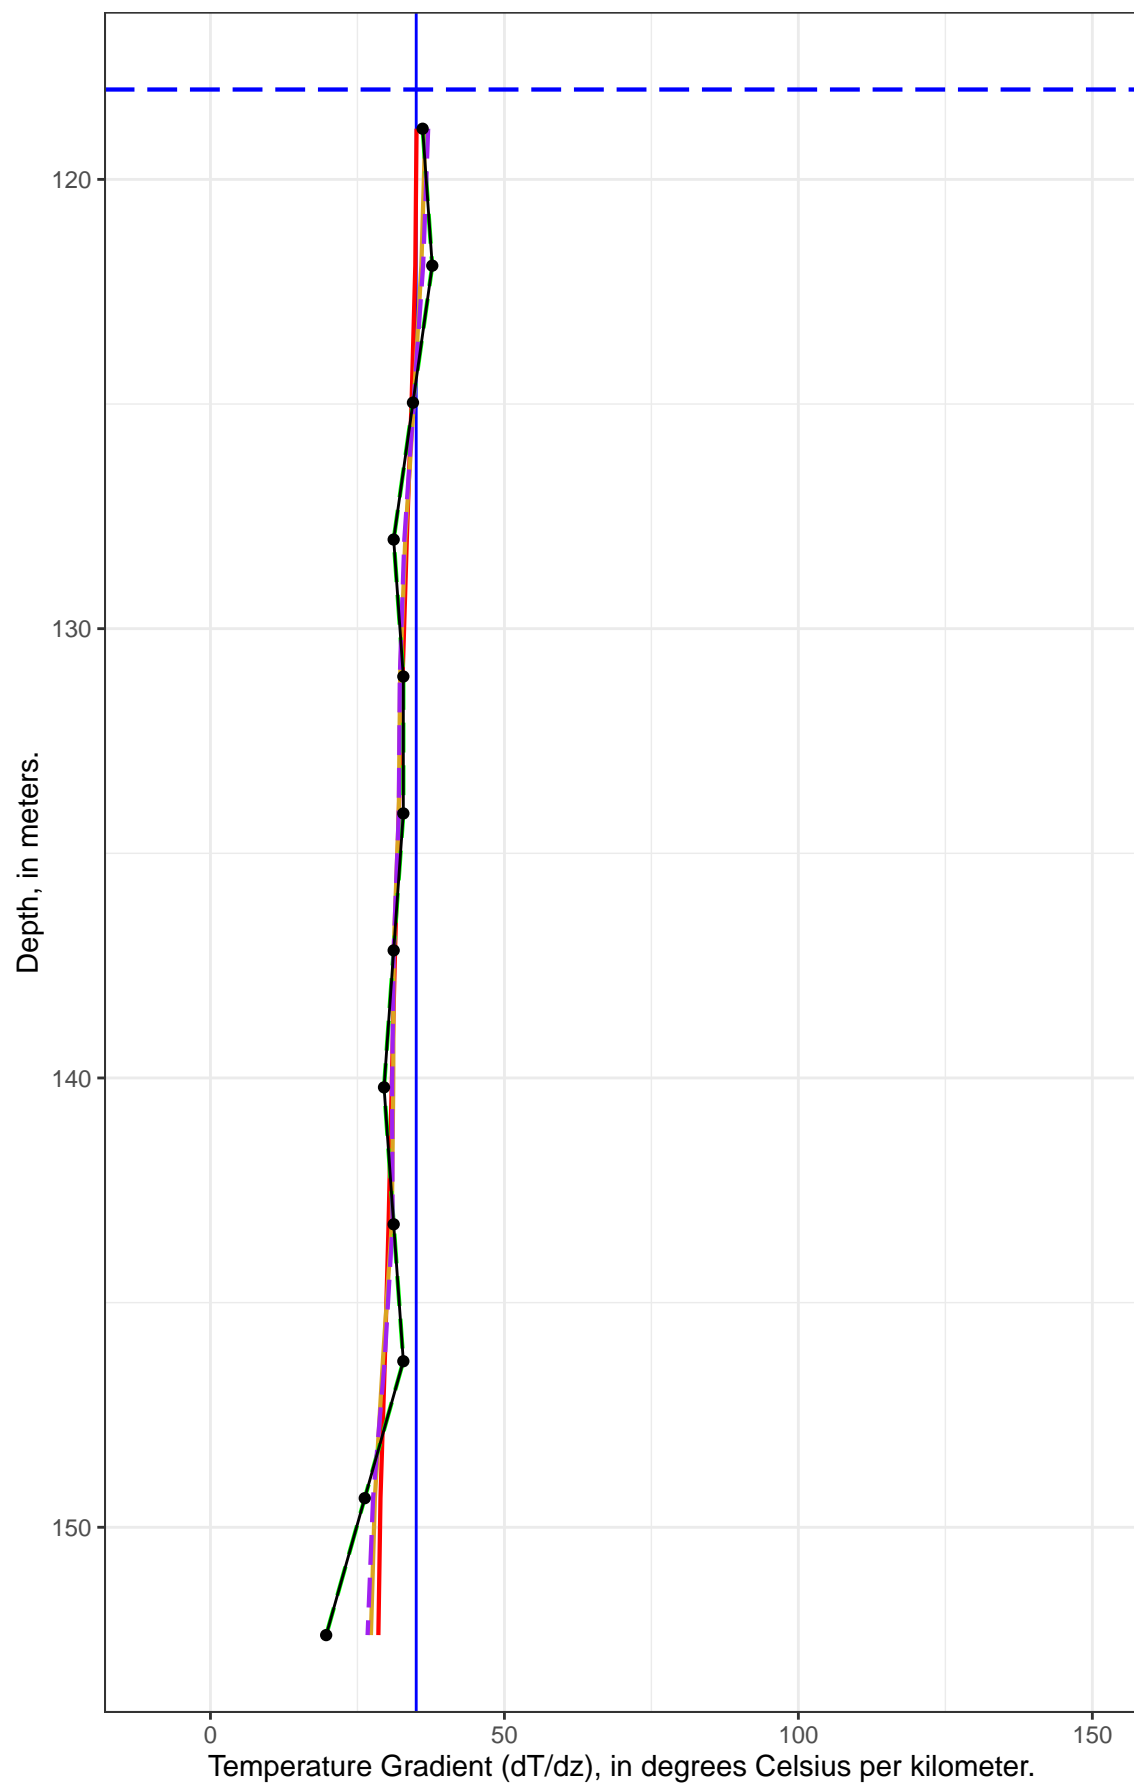

ID: 176 [H-6-78-1027\_KILBOURNE\_HOLE] Second Derivative

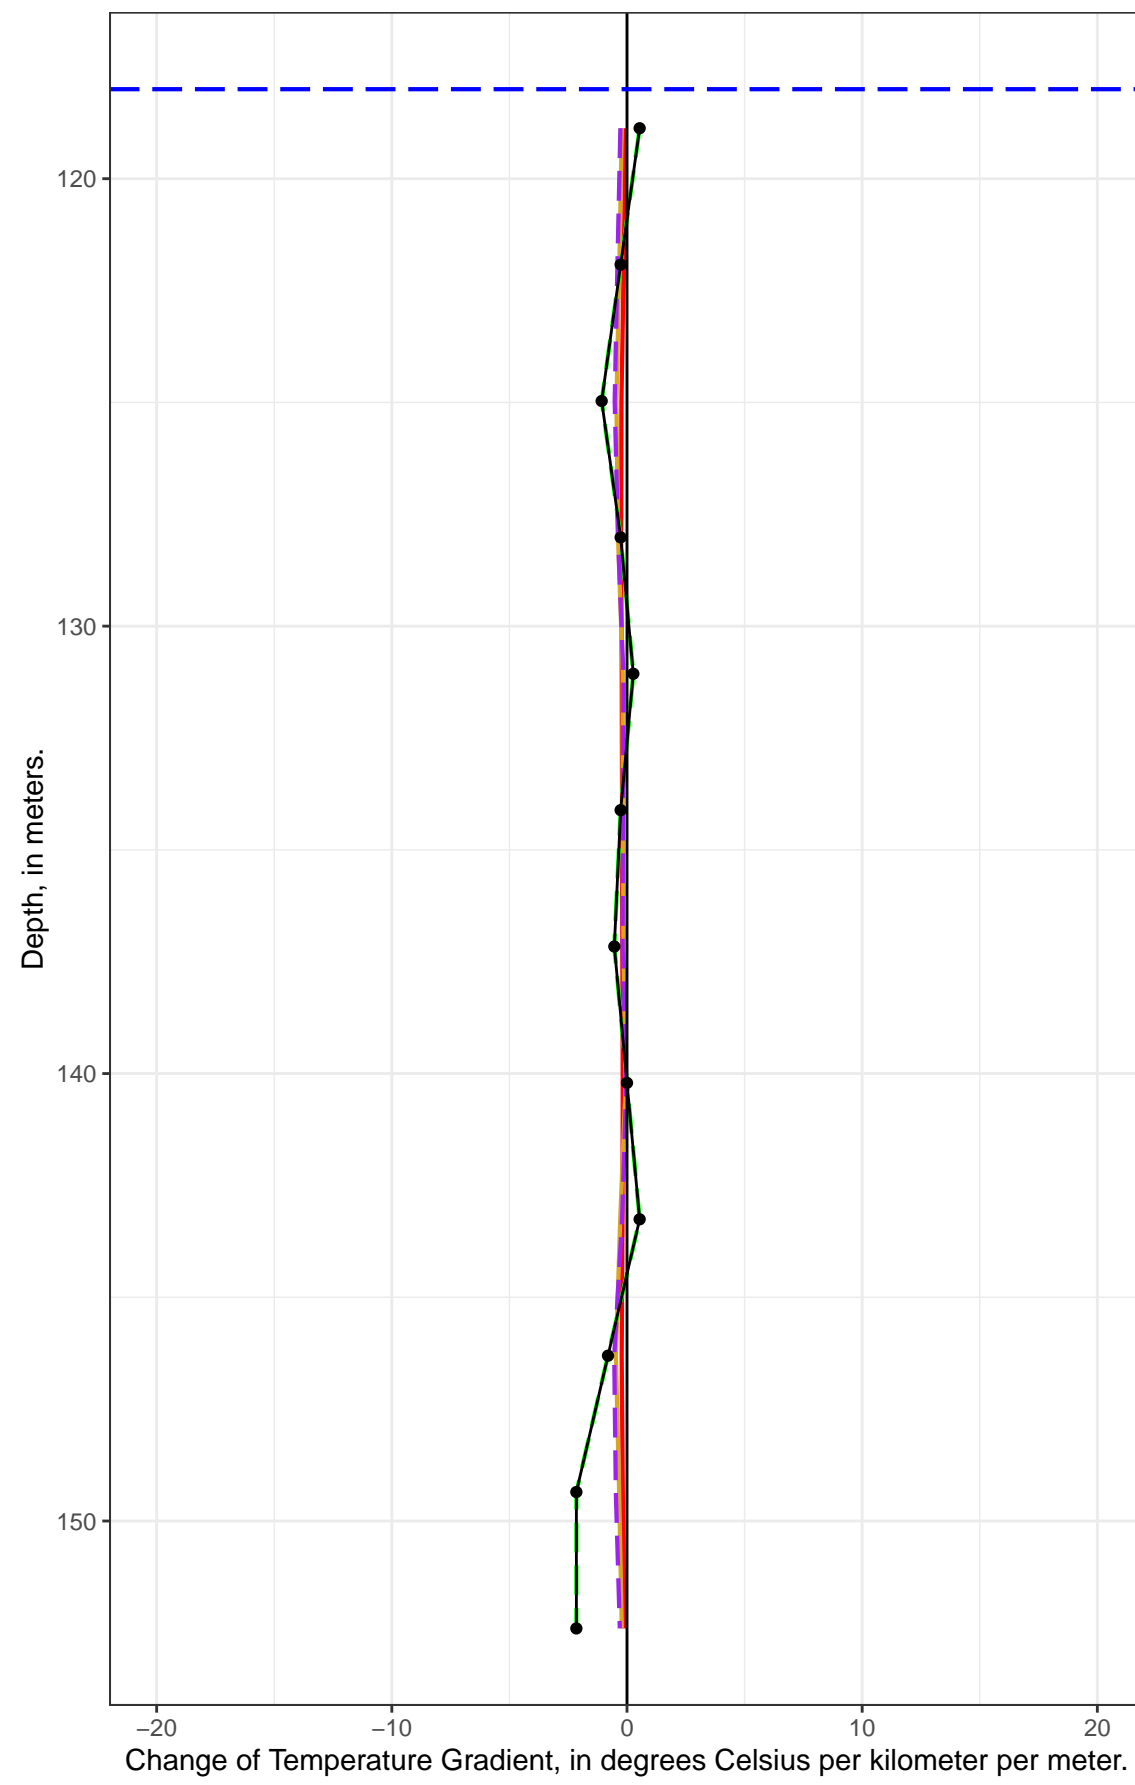

• Data • LOESS (AICC) • LOESS (constant) • LOESS (GCV) • Spline

• Data • LOESS (AICC) • LOESS (constant) • LOESS (GCV) • Spline

• Data • LOESS (AICC) • LOESS (constant) • LOESS (GCV) • Spline

ID: 177 [H-6-78-1033\_KILBOURNE\_HOLE] Smoothed Profile

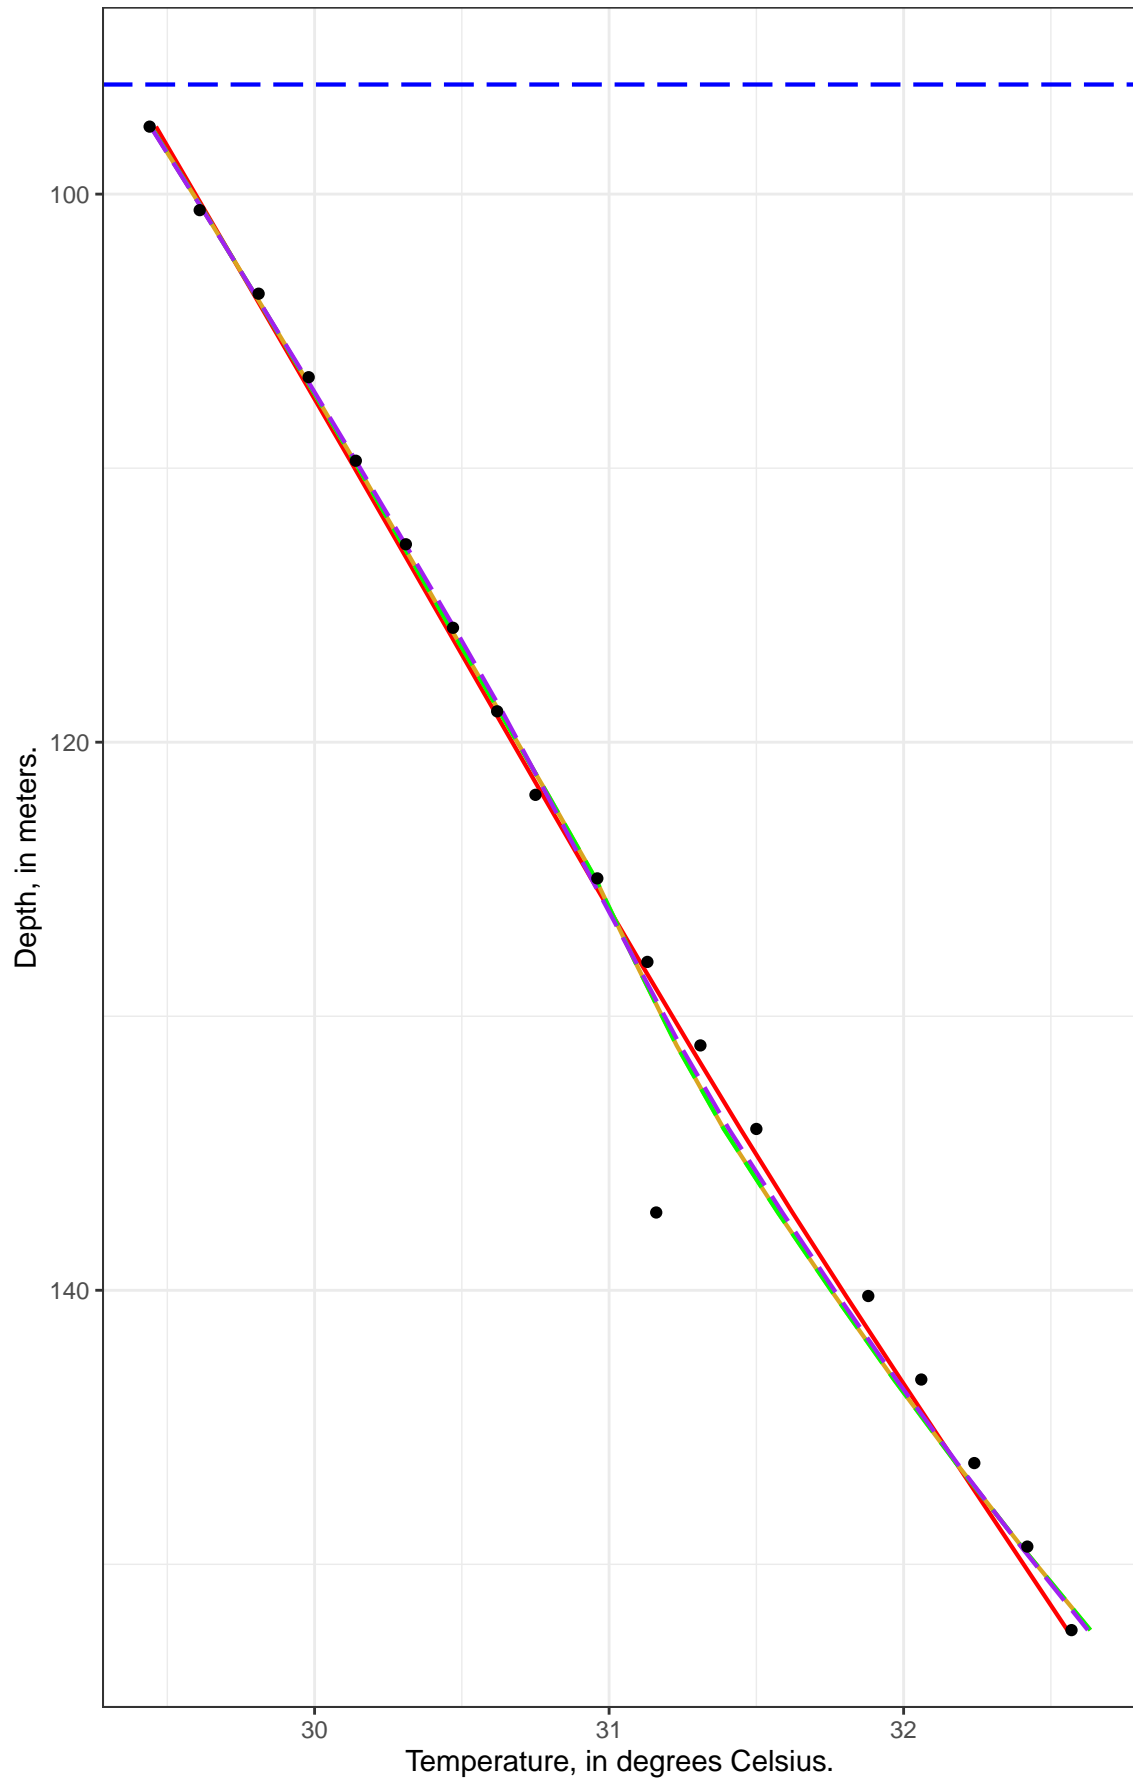

ID: 177 [H-6-78-1033\_KILBOURNE\_HOLE] First Derivative

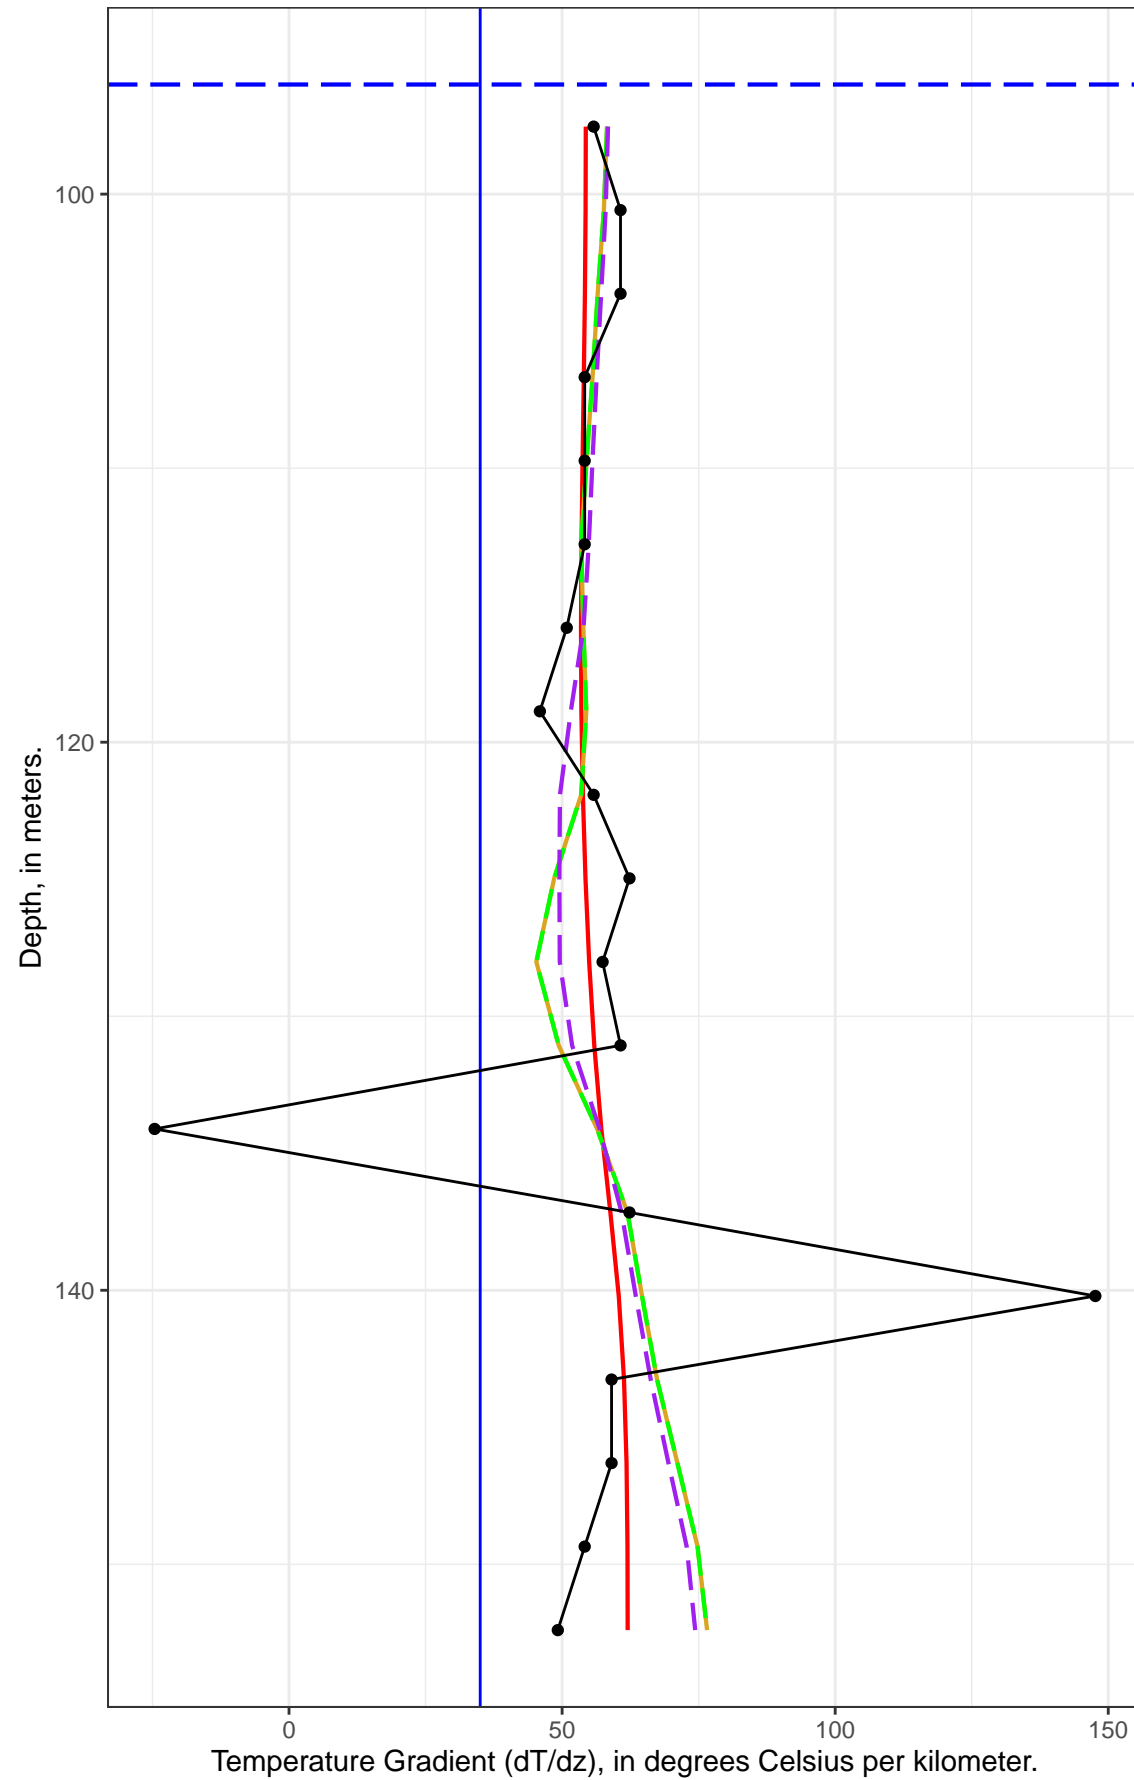

ID: 177 [H-6-78-1033\_KILBOURNE\_HOLE] Second Derivative

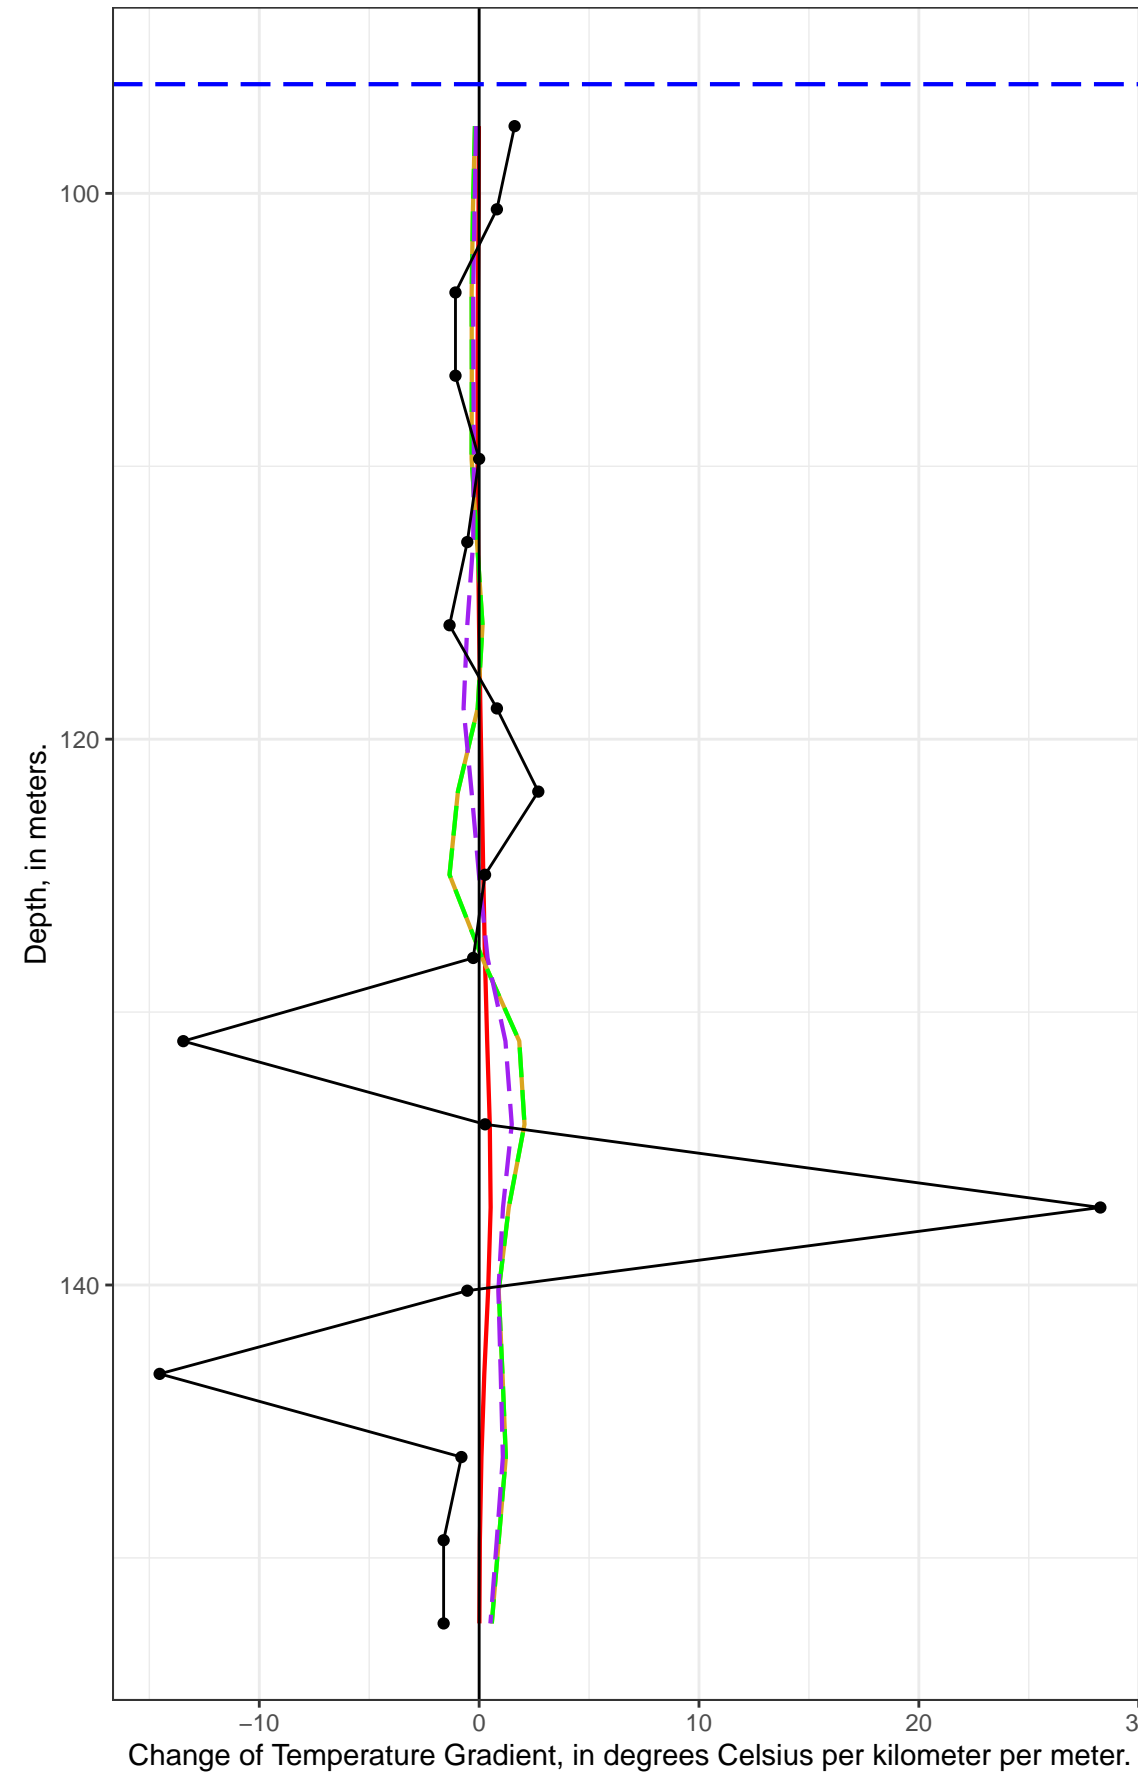

• Data — LOESS (AICC) — LOESS (constant) — LOESS (GCV) — Spline

• Data — LOESS (AICC) — LOESS (constant) — LOESS (GCV) — Spline

• Data — LOESS (AICC) — LOESS (constant) — LOESS (GCV) — Spline



ID: 178 [H-6-78-1037\_KILBOURNE\_HOLE] Smoothed Profile

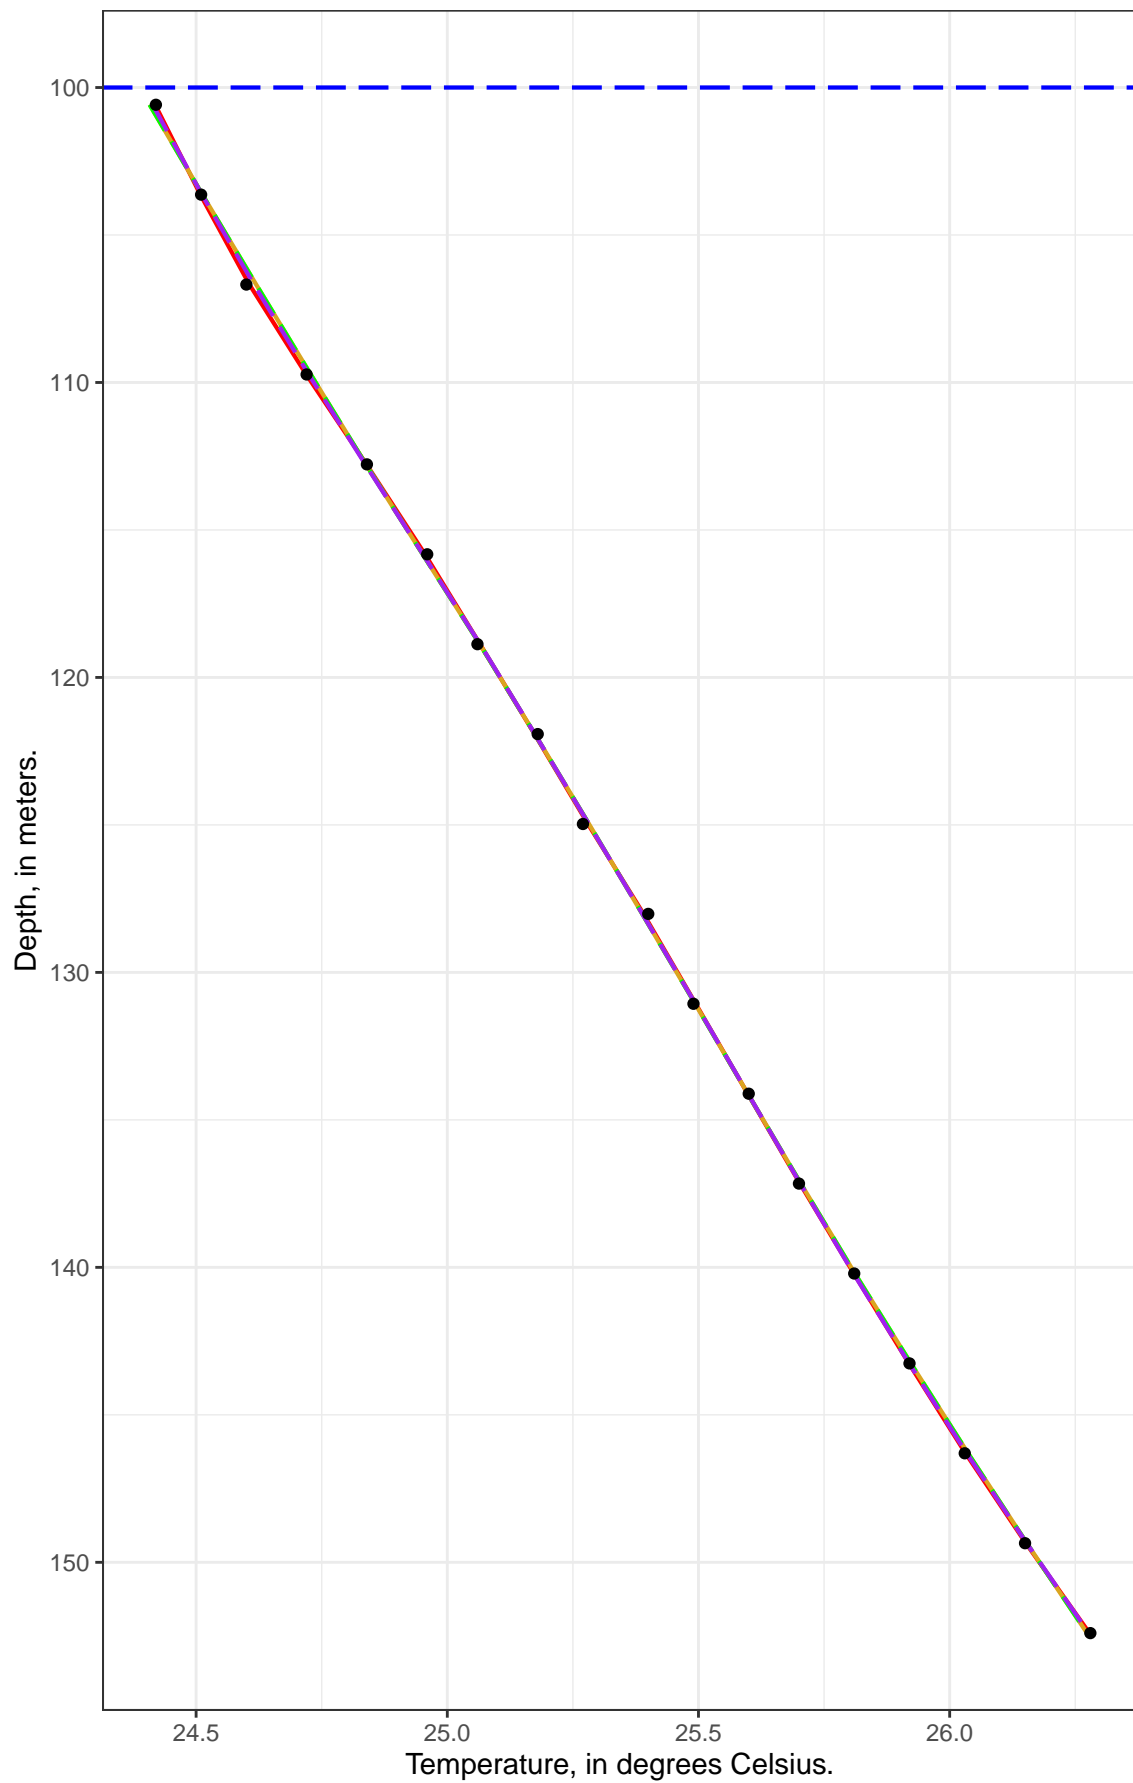

ID: 178 [H-6-78-1037\_KILBOURNE\_HOLE] First Derivative

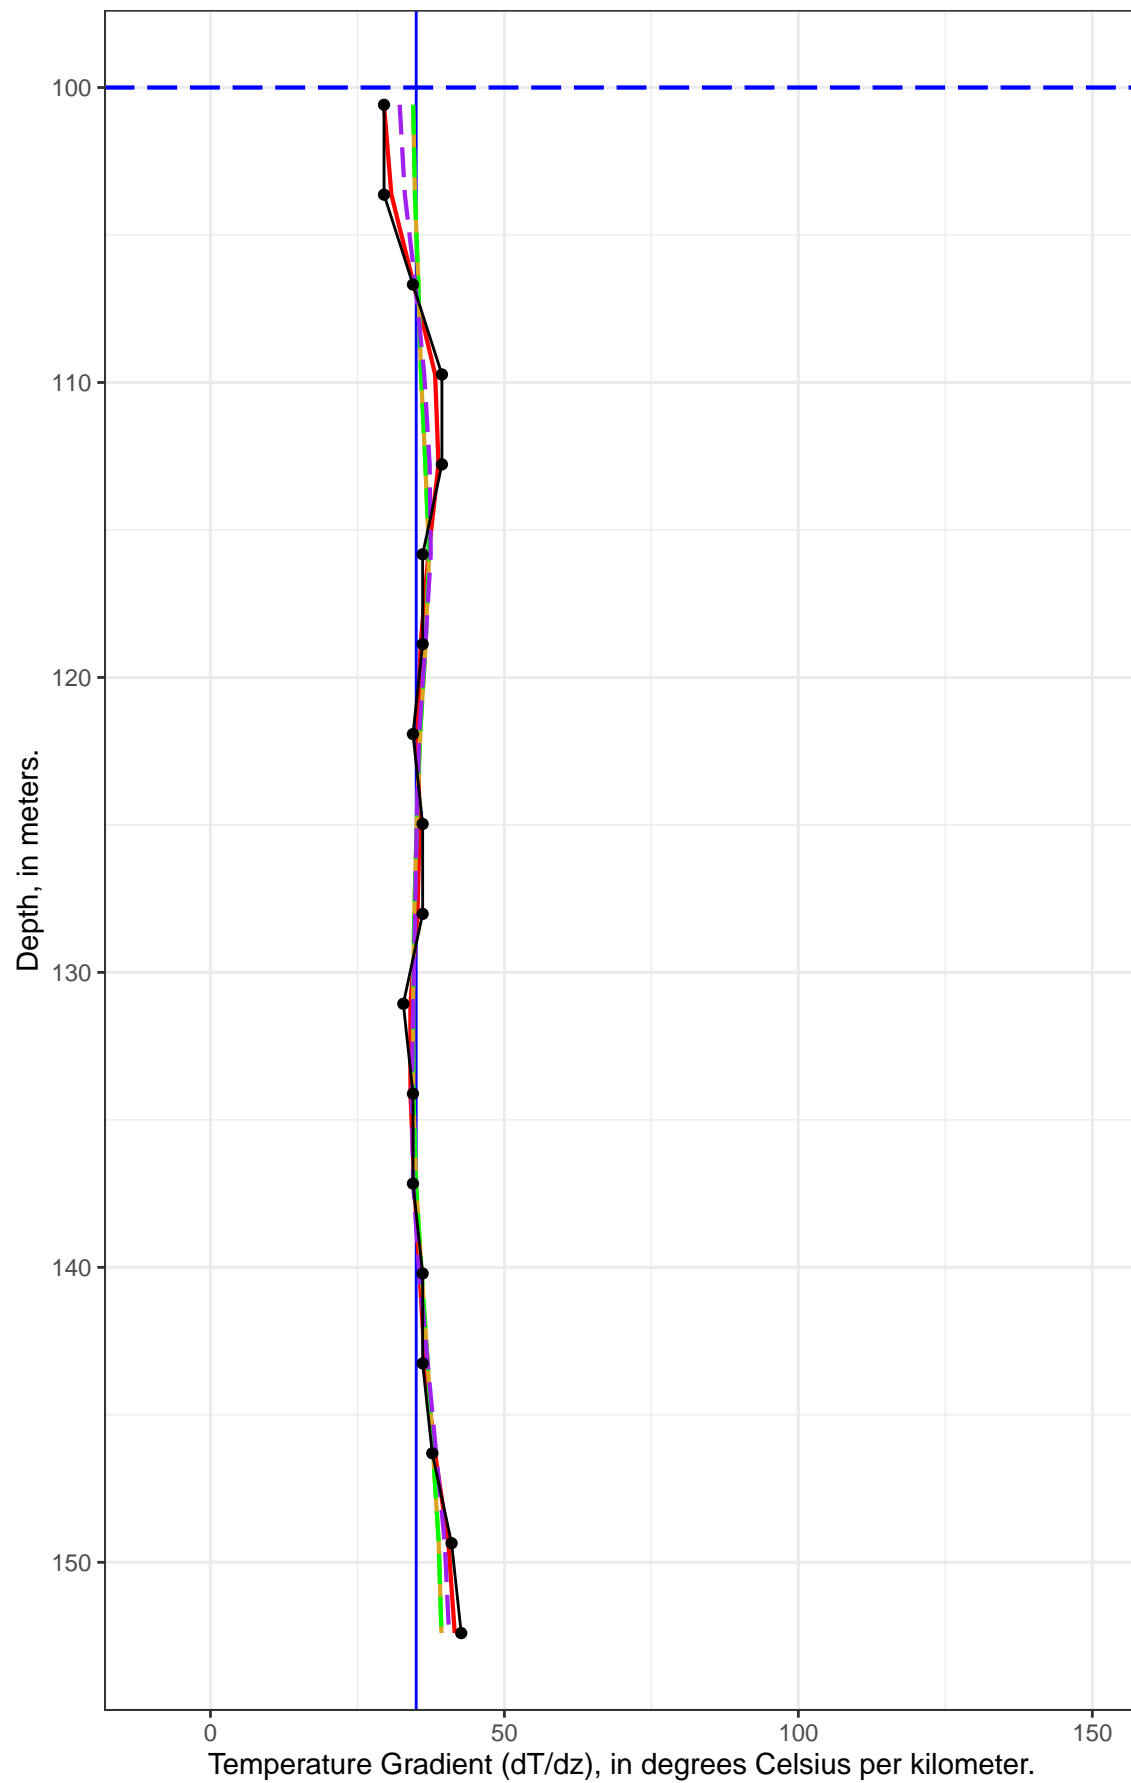

ID: 178 [H-6-78-1037\_KILBOURNE\_HOLE] Second Derivative

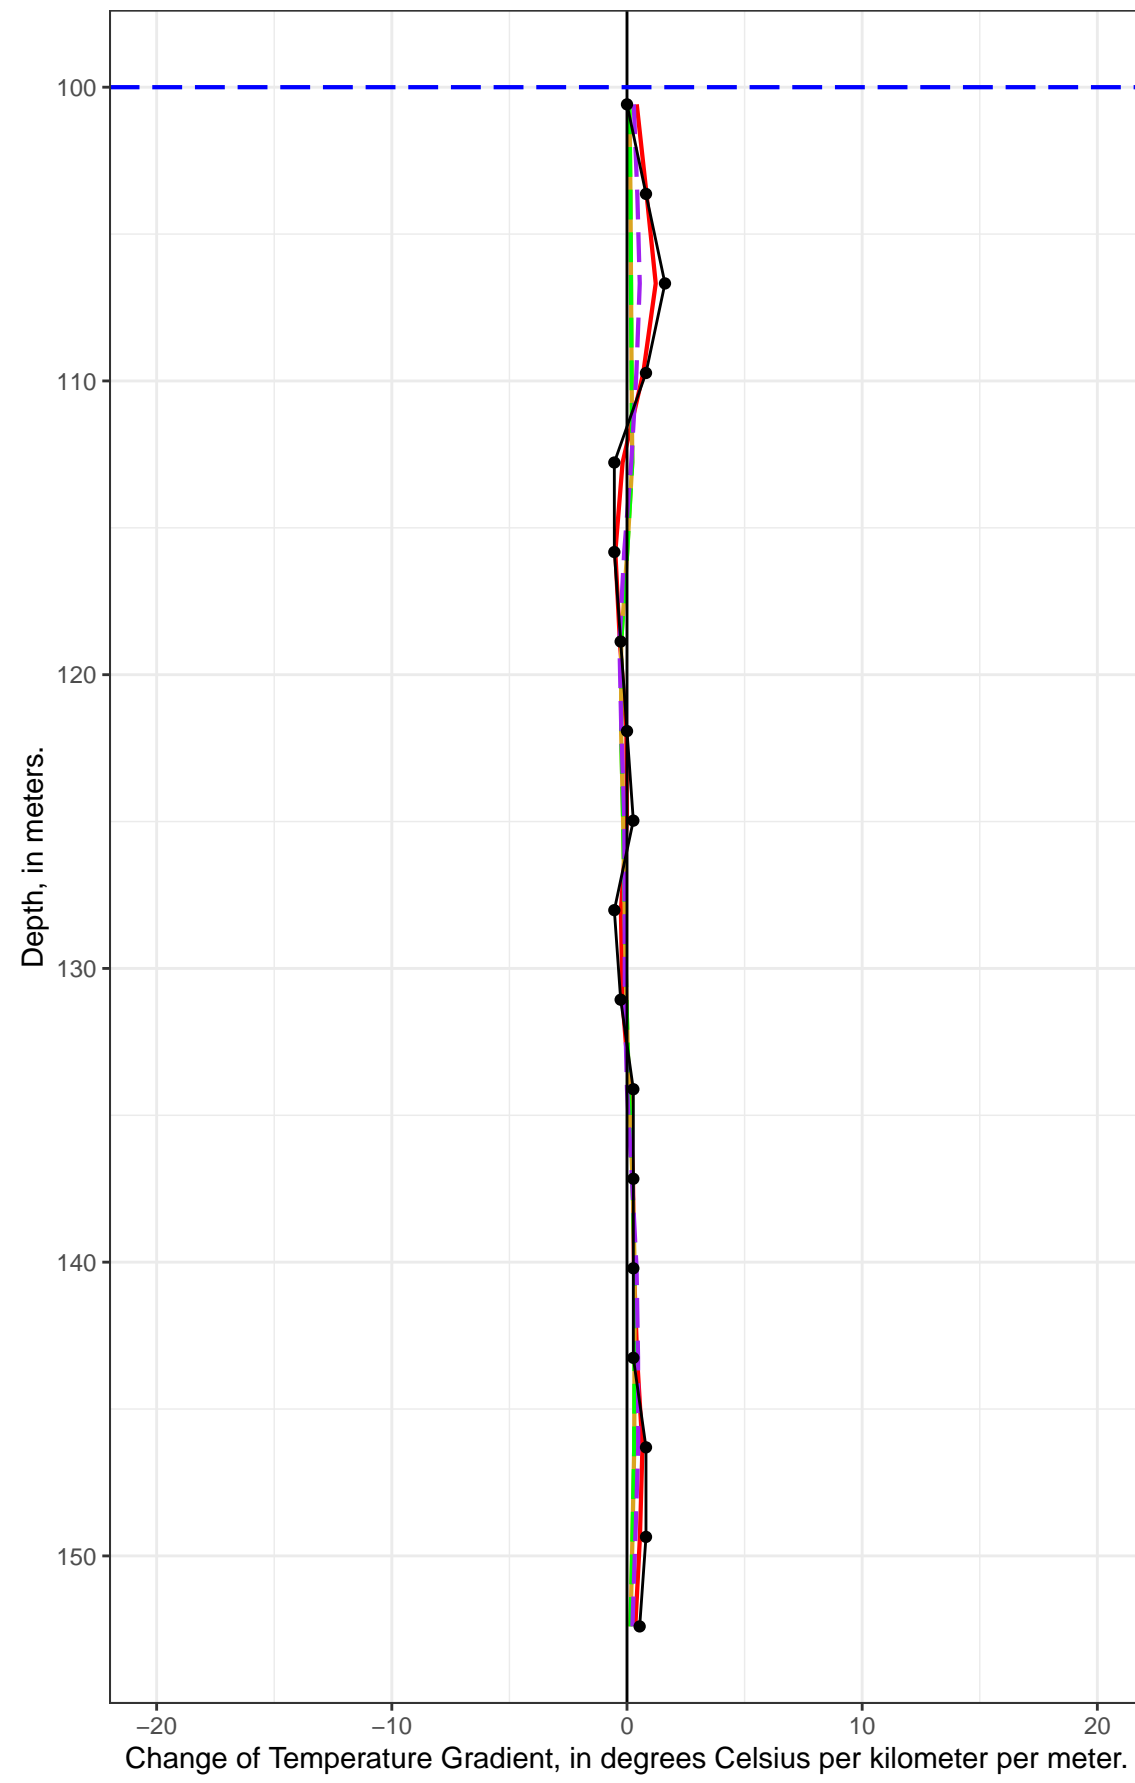

• Data • LOESS (AICC) • LOESS (constant) • LOESS (GCV) • Spline

• Data • LOESS (AICC) • LOESS (constant) • LOESS (GCV) • Spline

• Data • LOESS (AICC) • LOESS (constant) • LOESS (GCV) • Spline

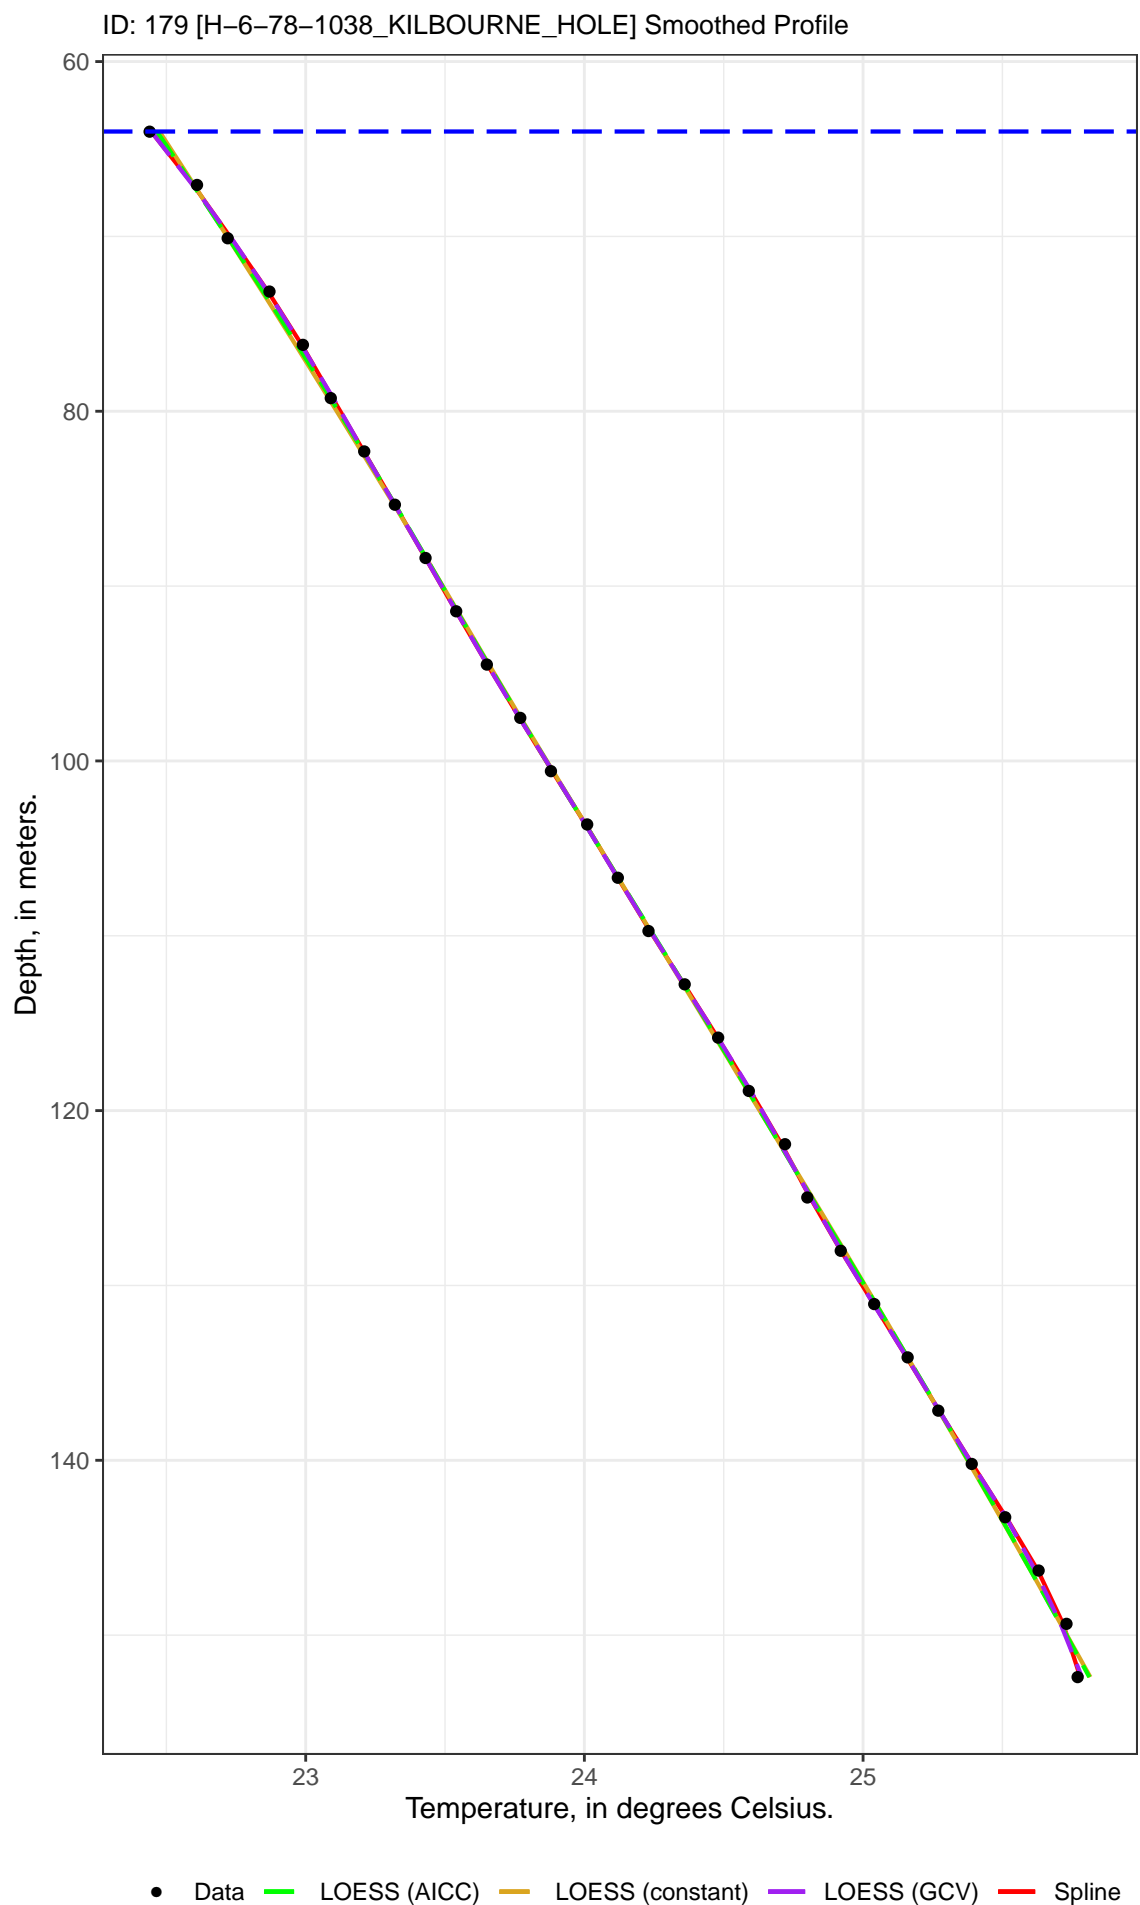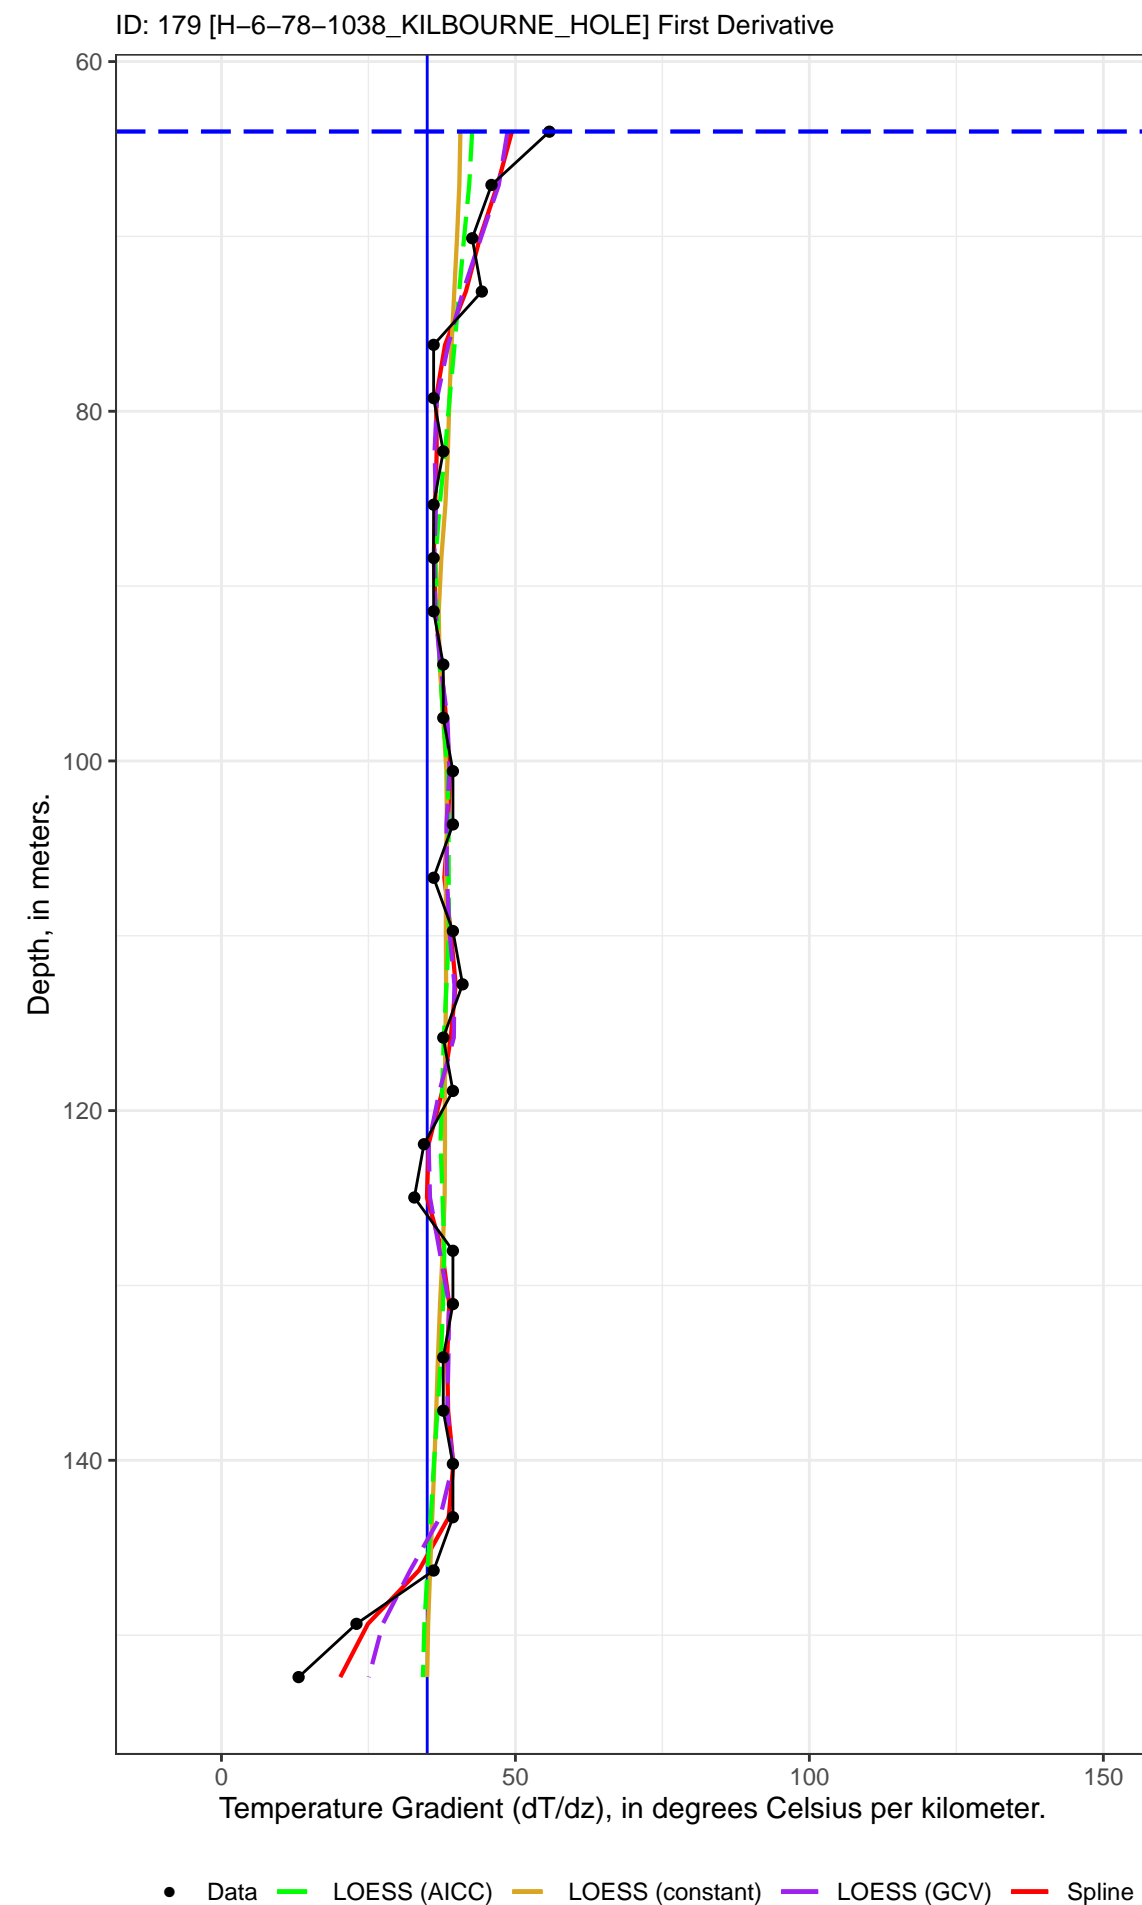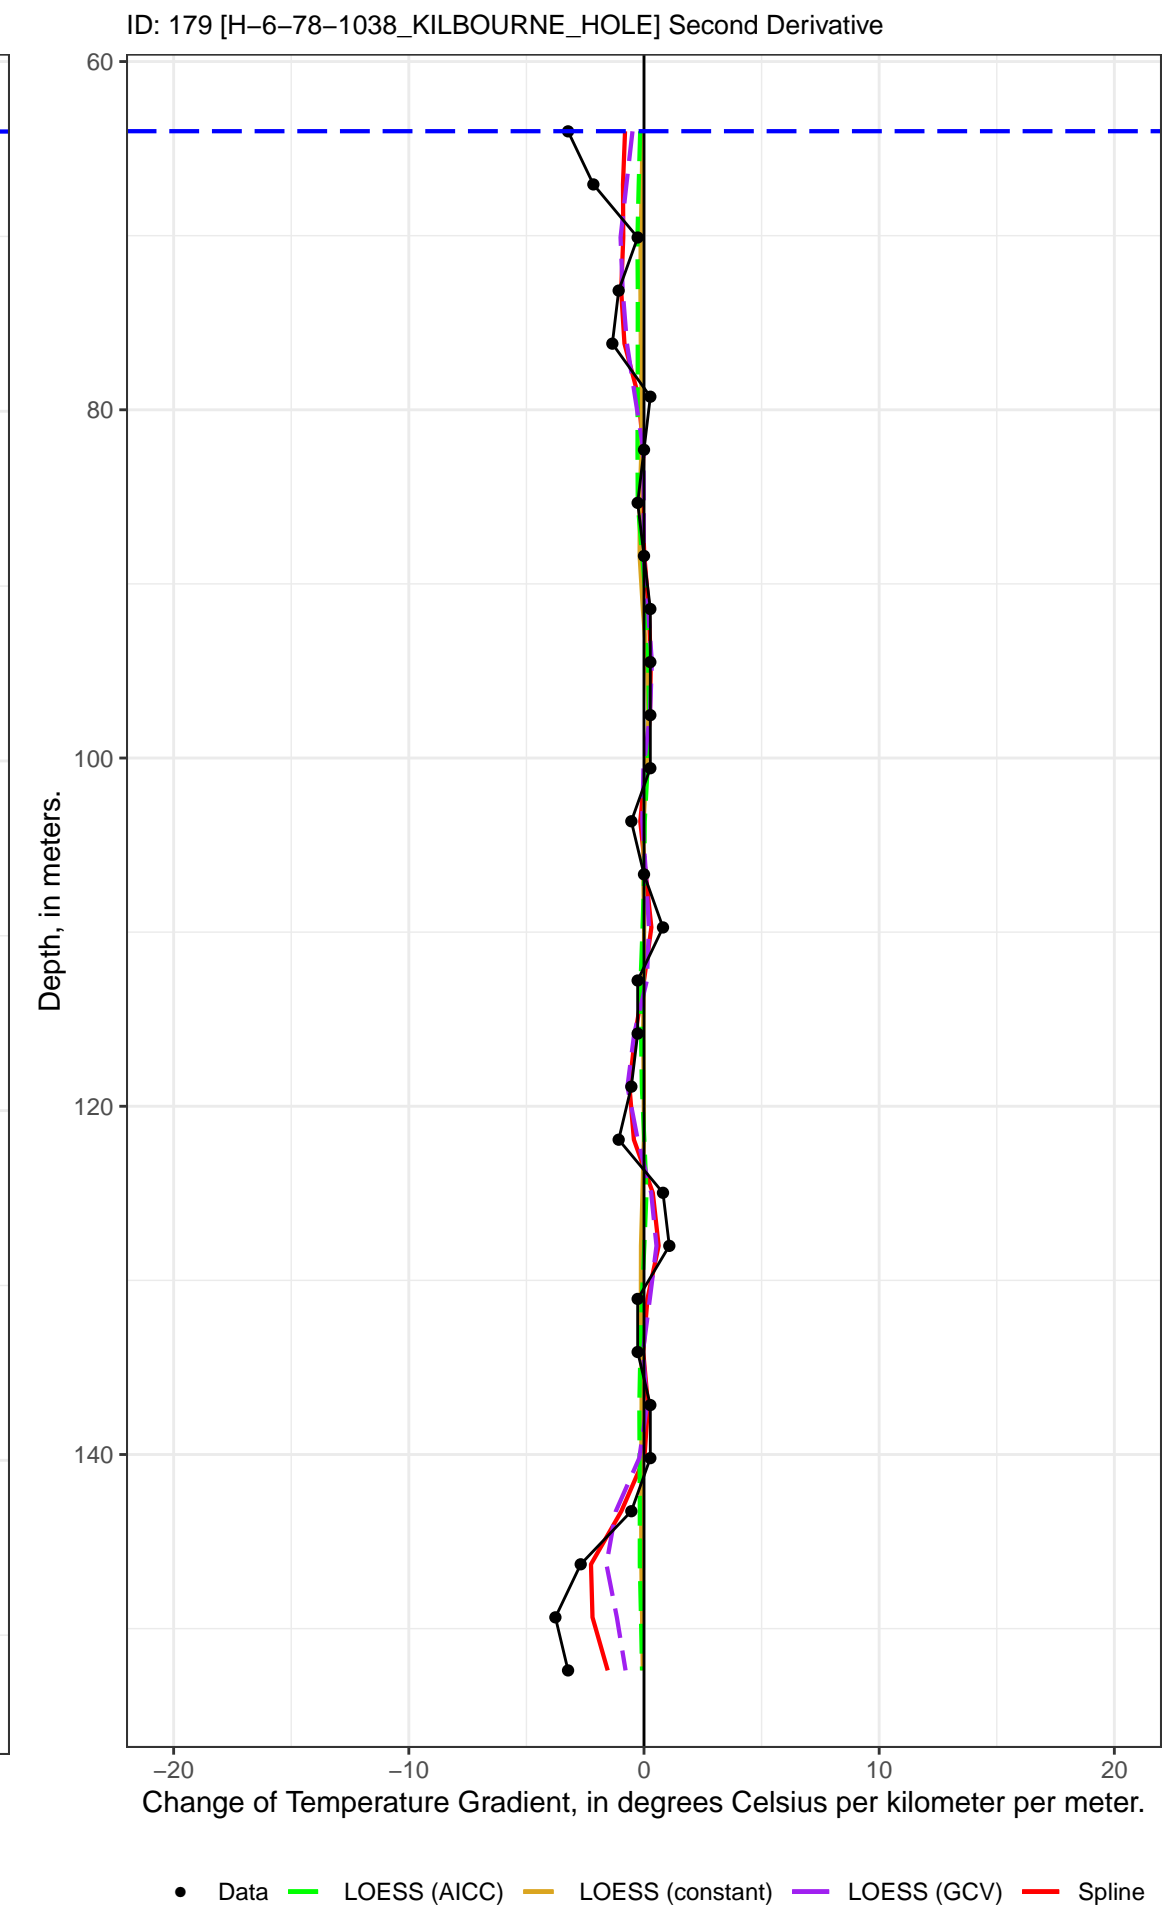

ID: 180 [HA\_Well] Smoothed Profile

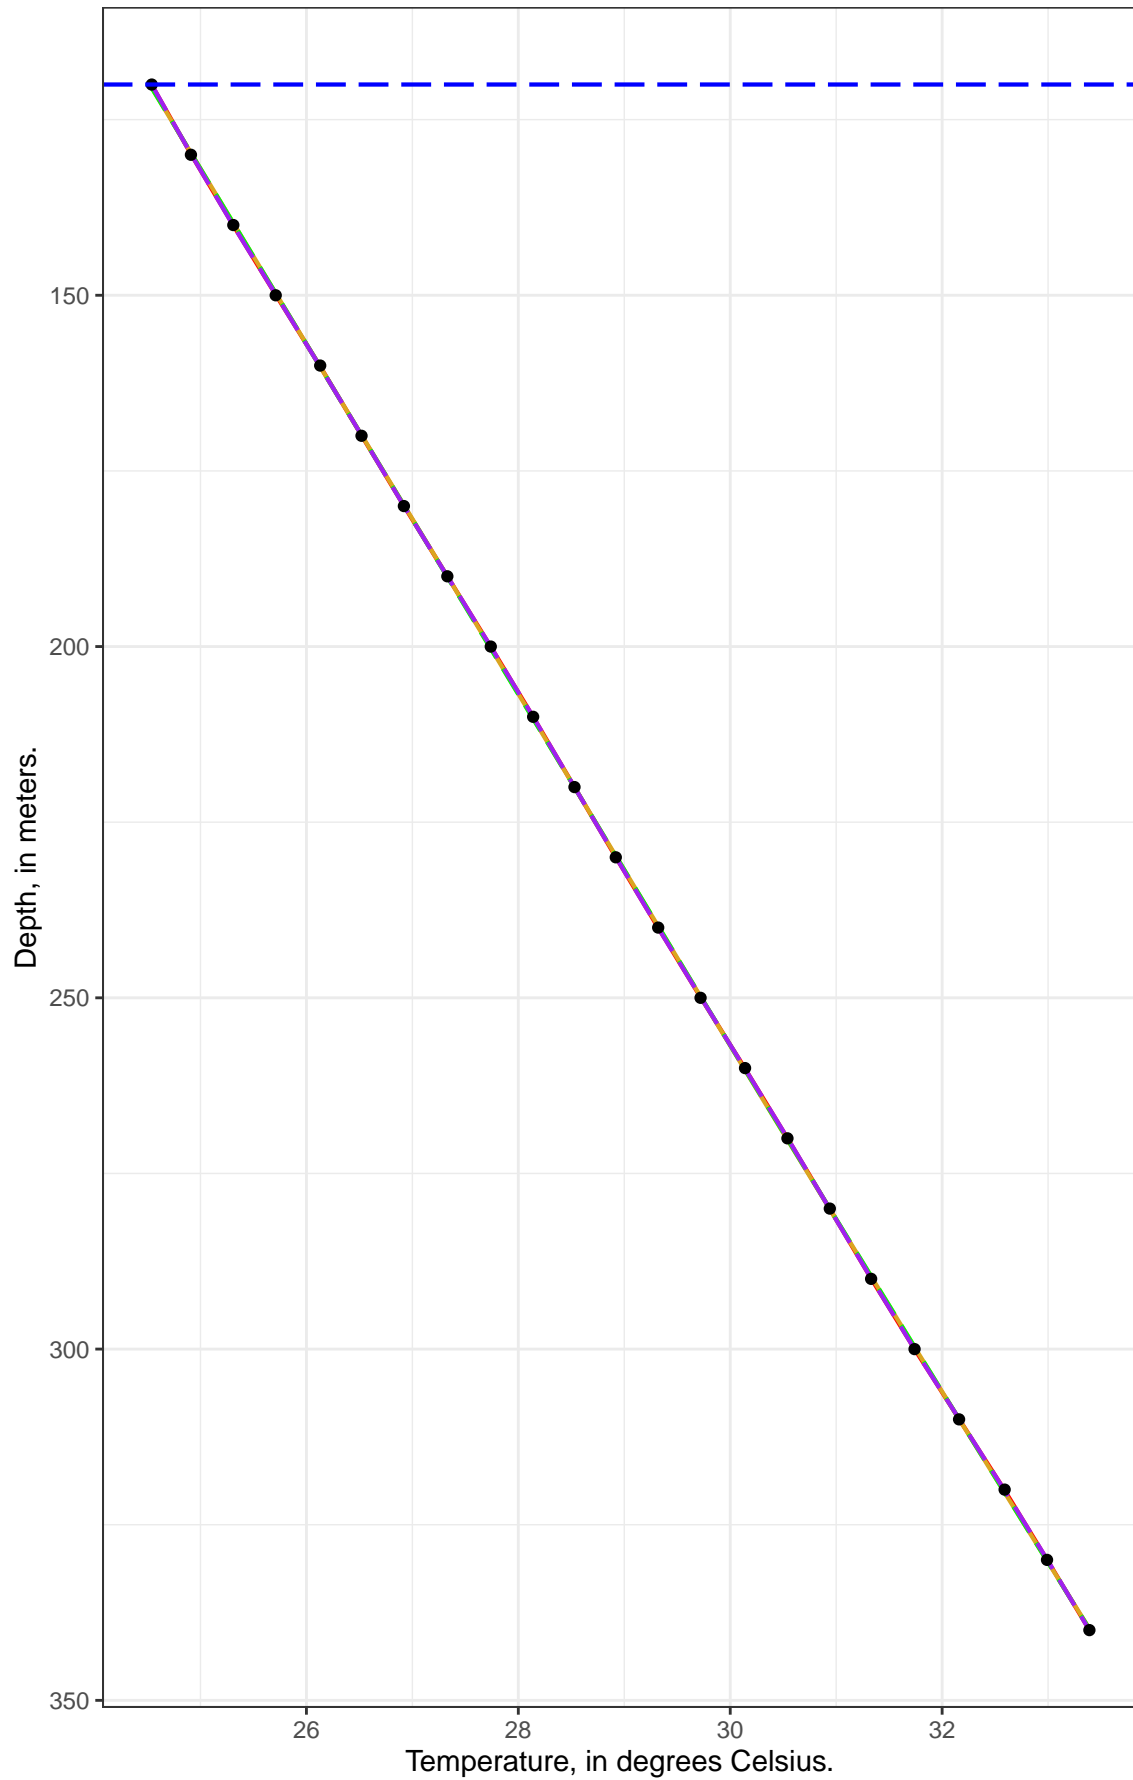

ID: 180 [HA\_Well] First Derivative

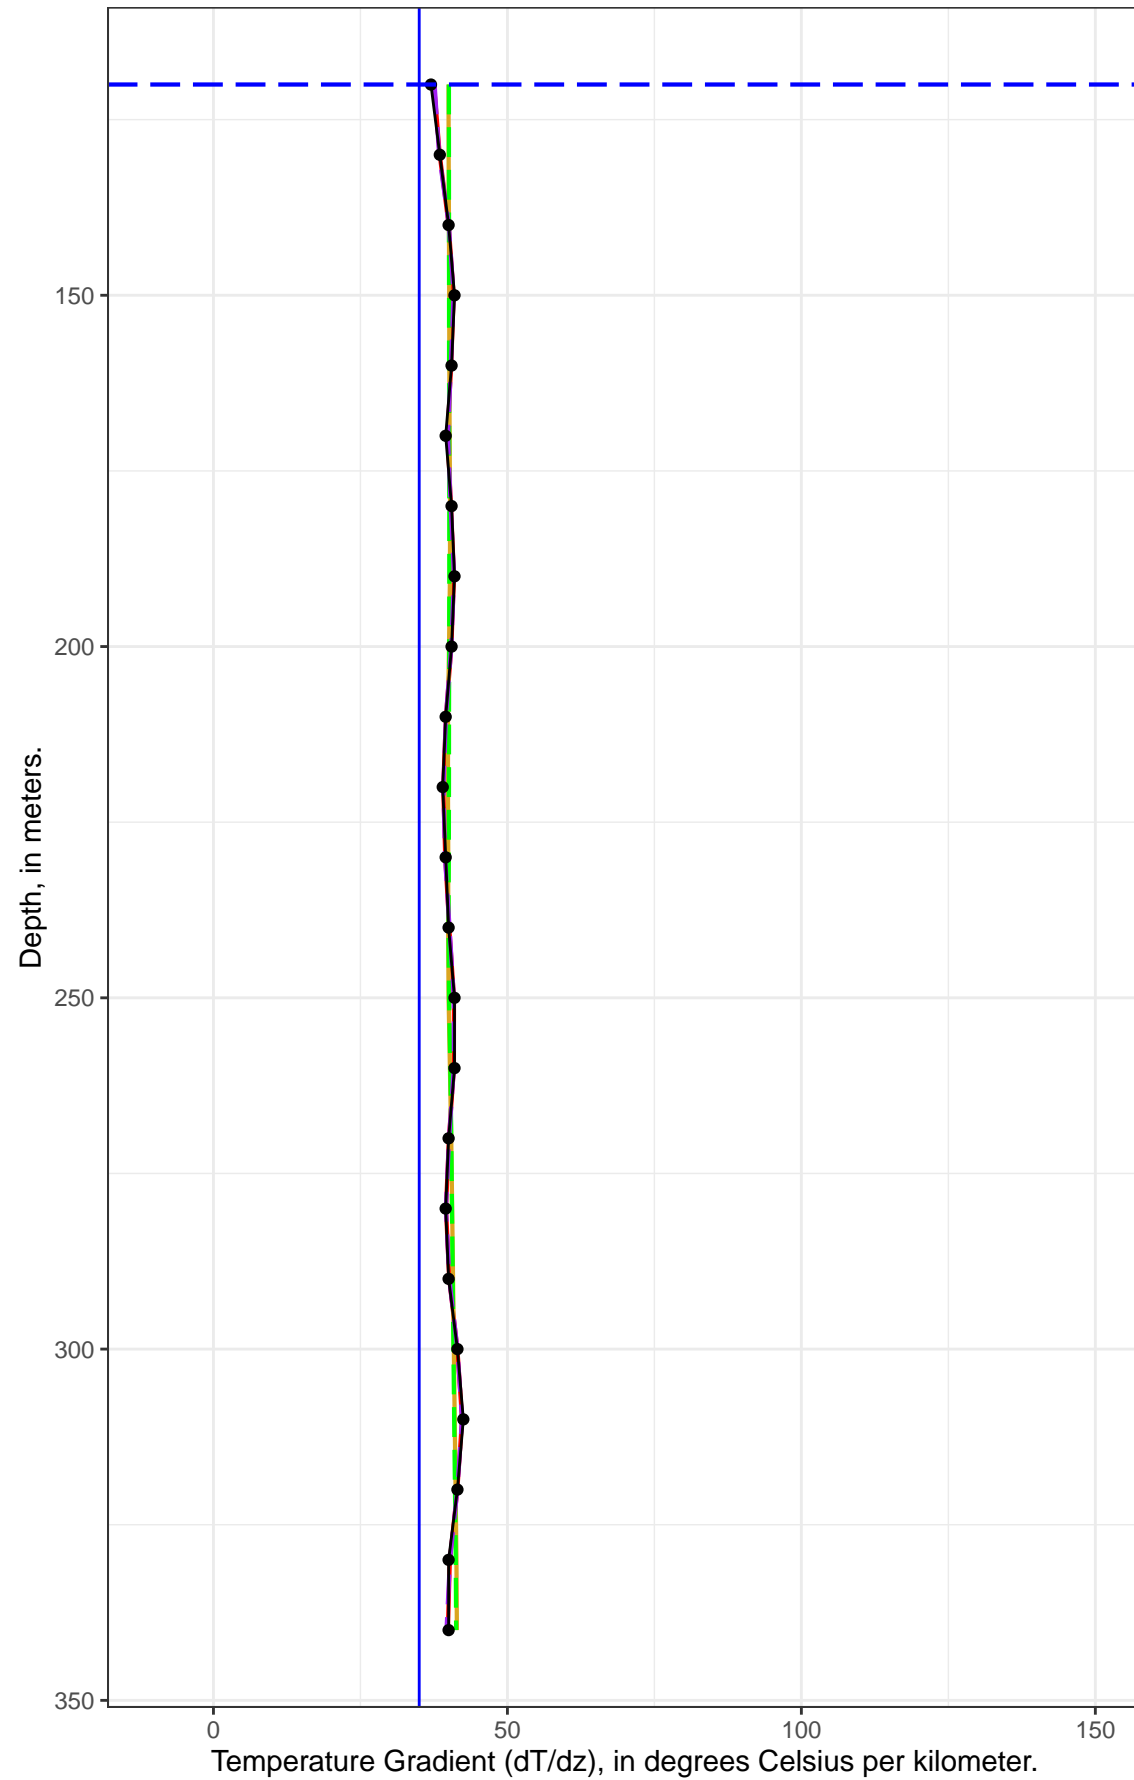

ID: 180 [HA\_Well] Second Derivative

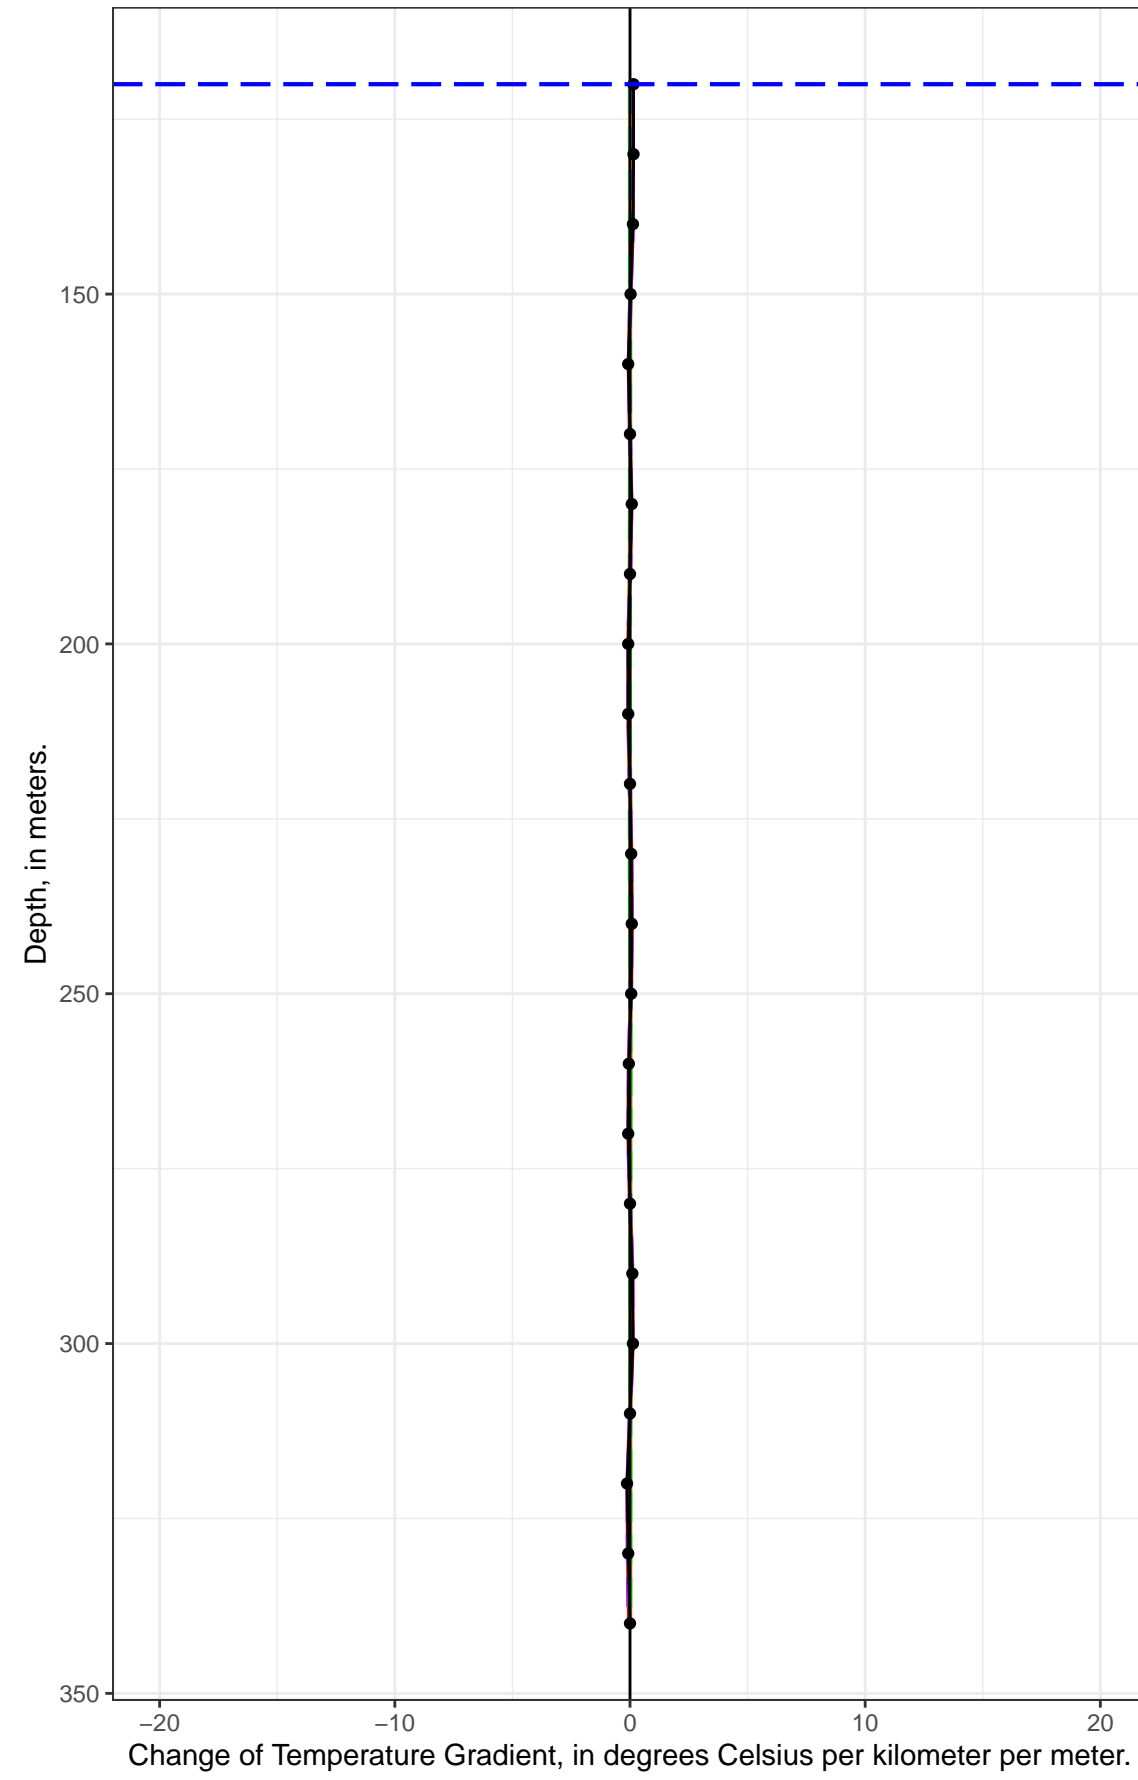

• Data — LOESS (AICC) — LOESS (constant) — LOESS (GCV) — Spline

• Data — LOESS (AICC) — LOESS (constant) — LOESS (GCV) — Spline

• Data — LOESS (AICC) — LOESS (constant) — LOESS (GCV) — Spline

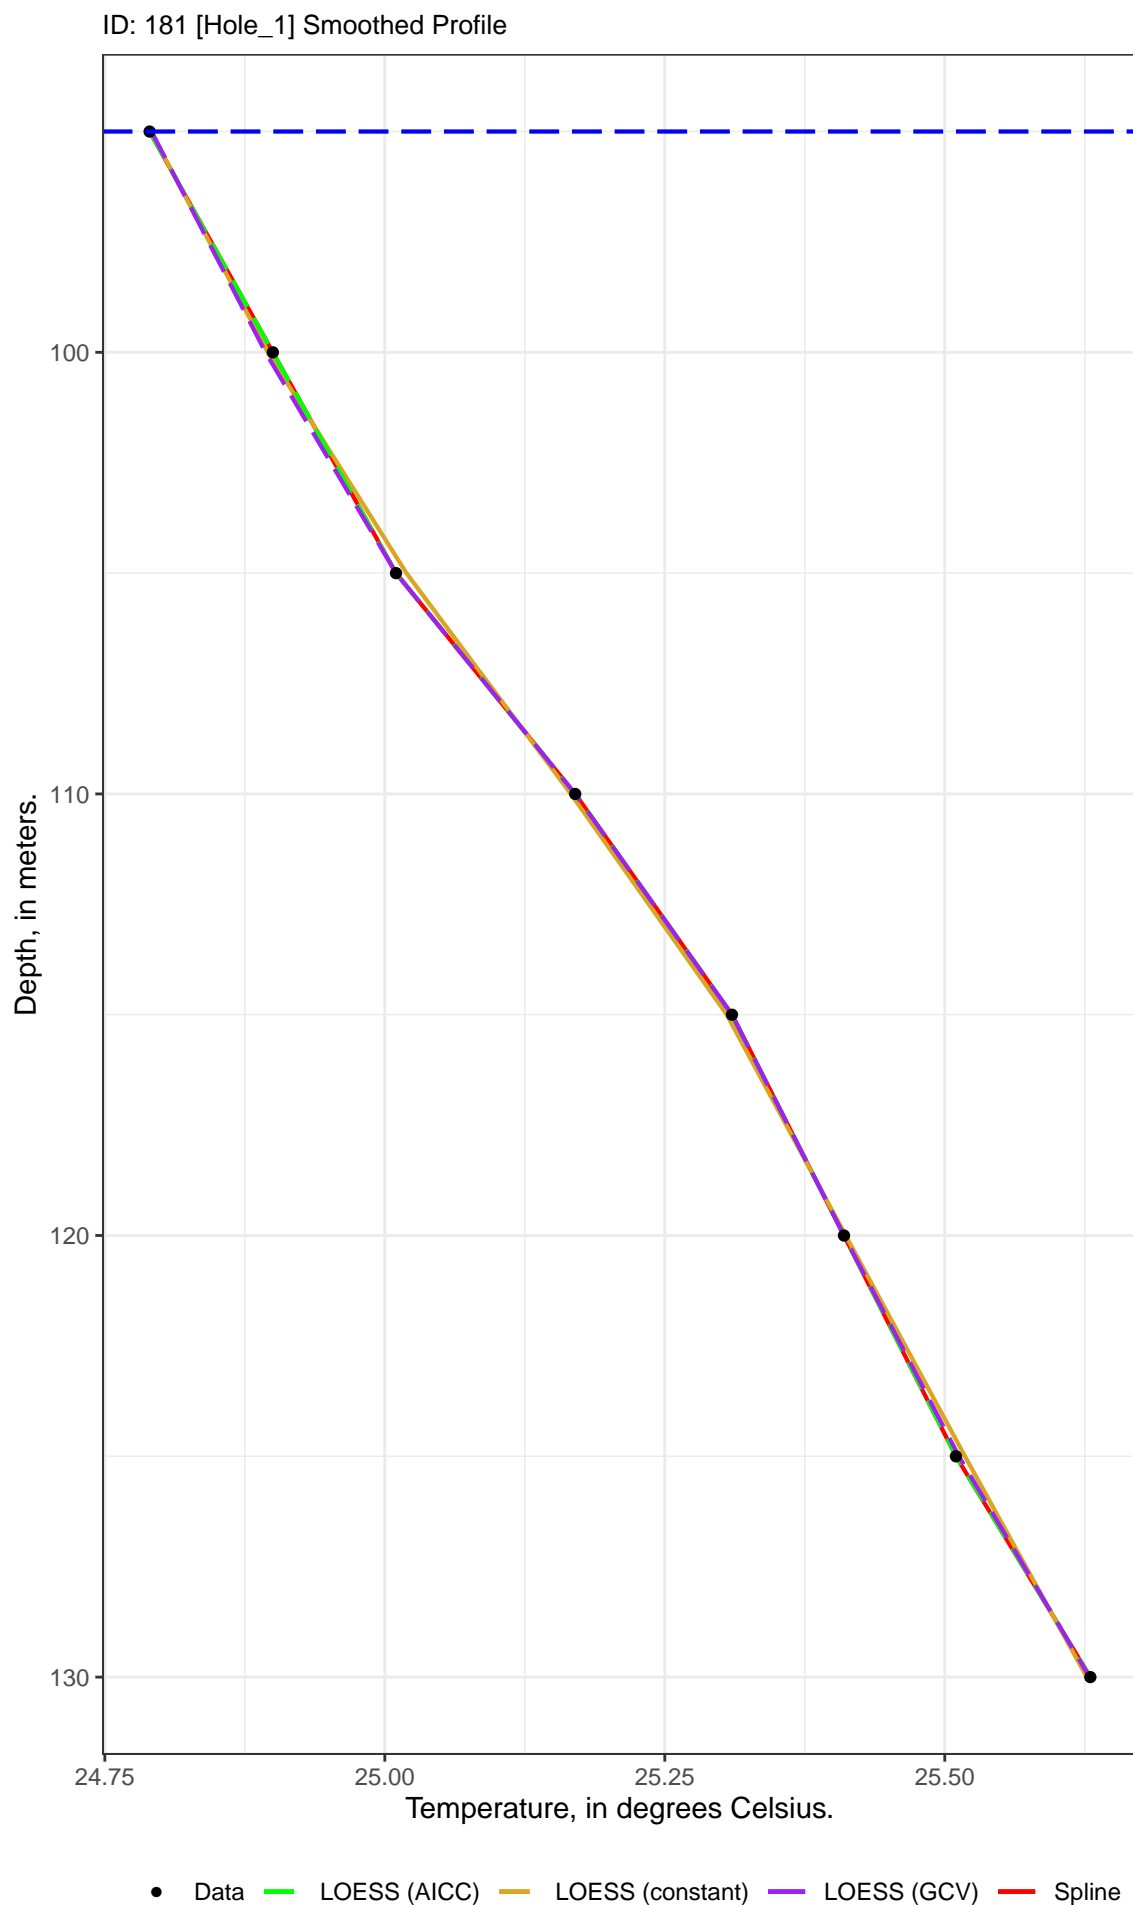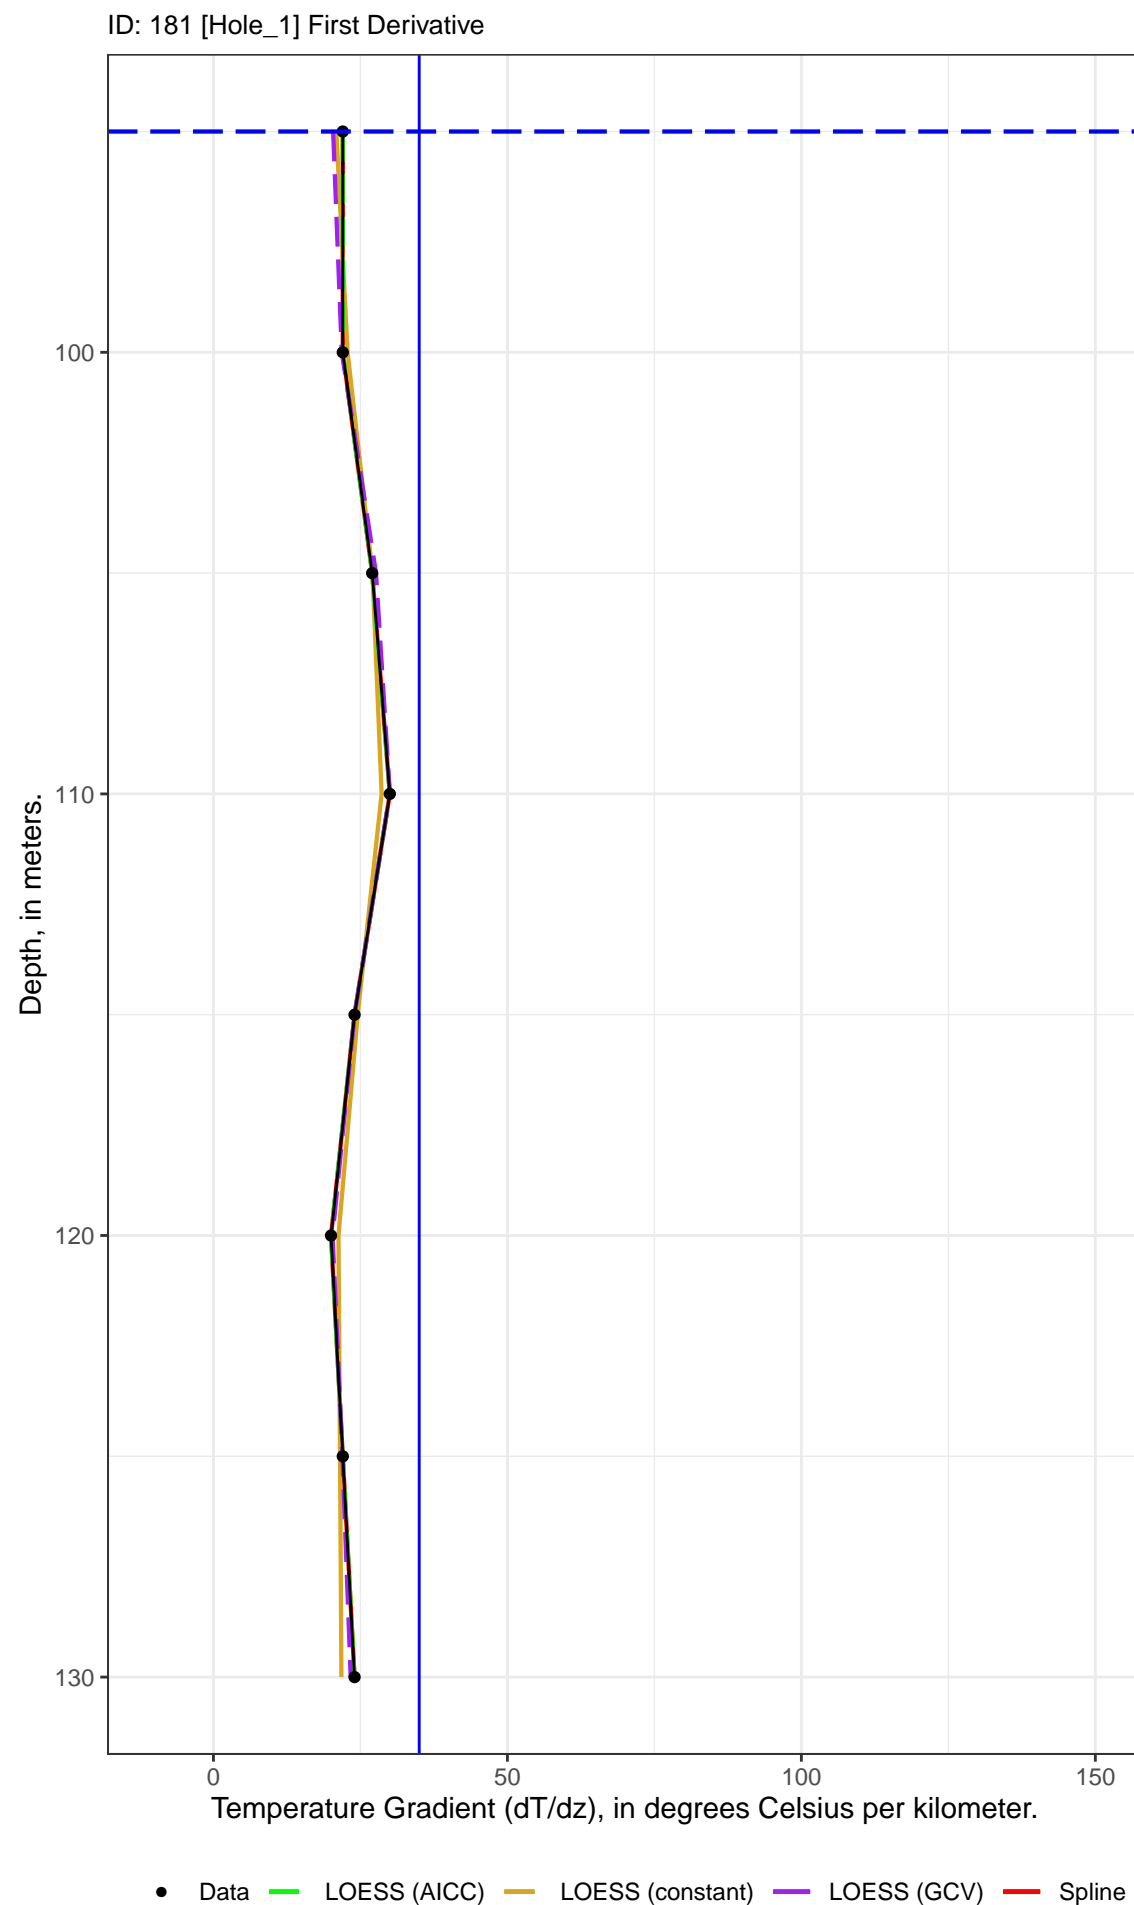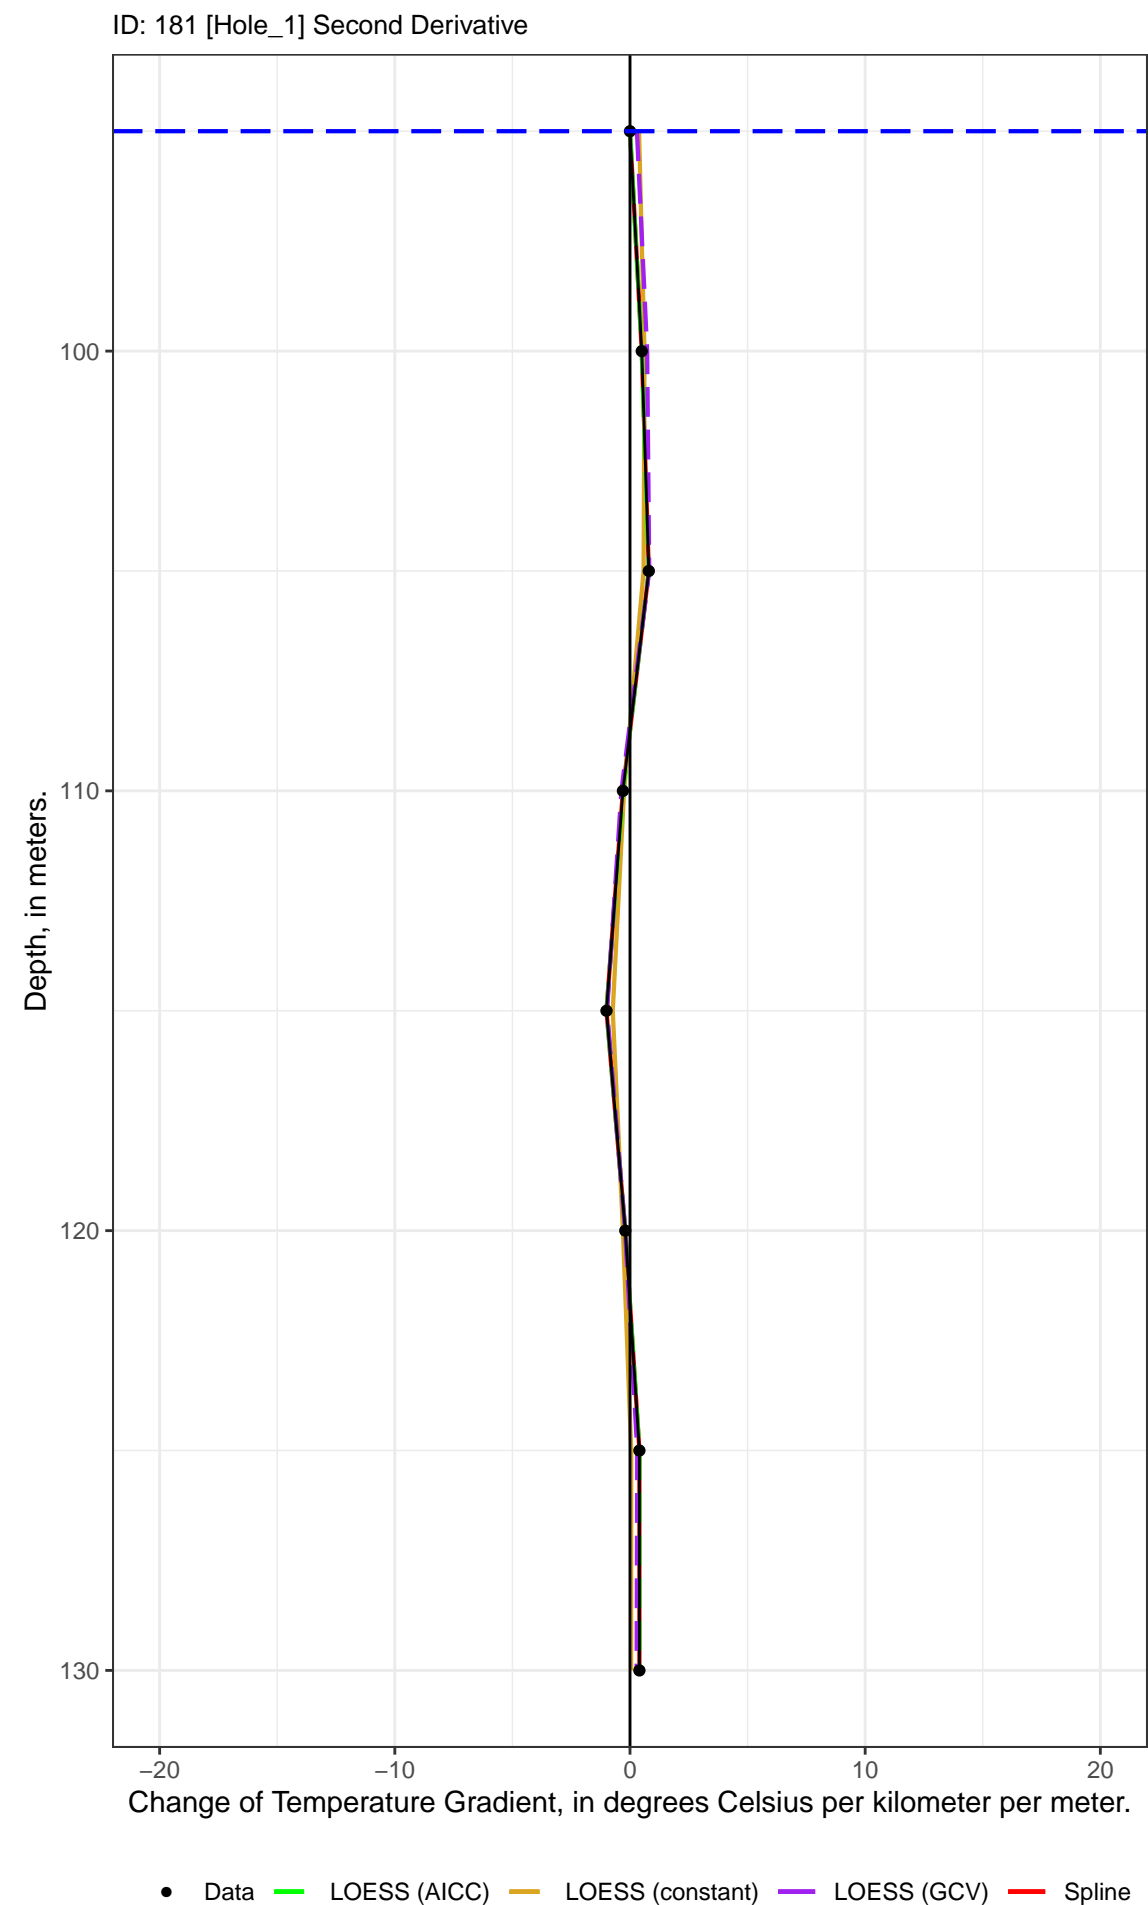

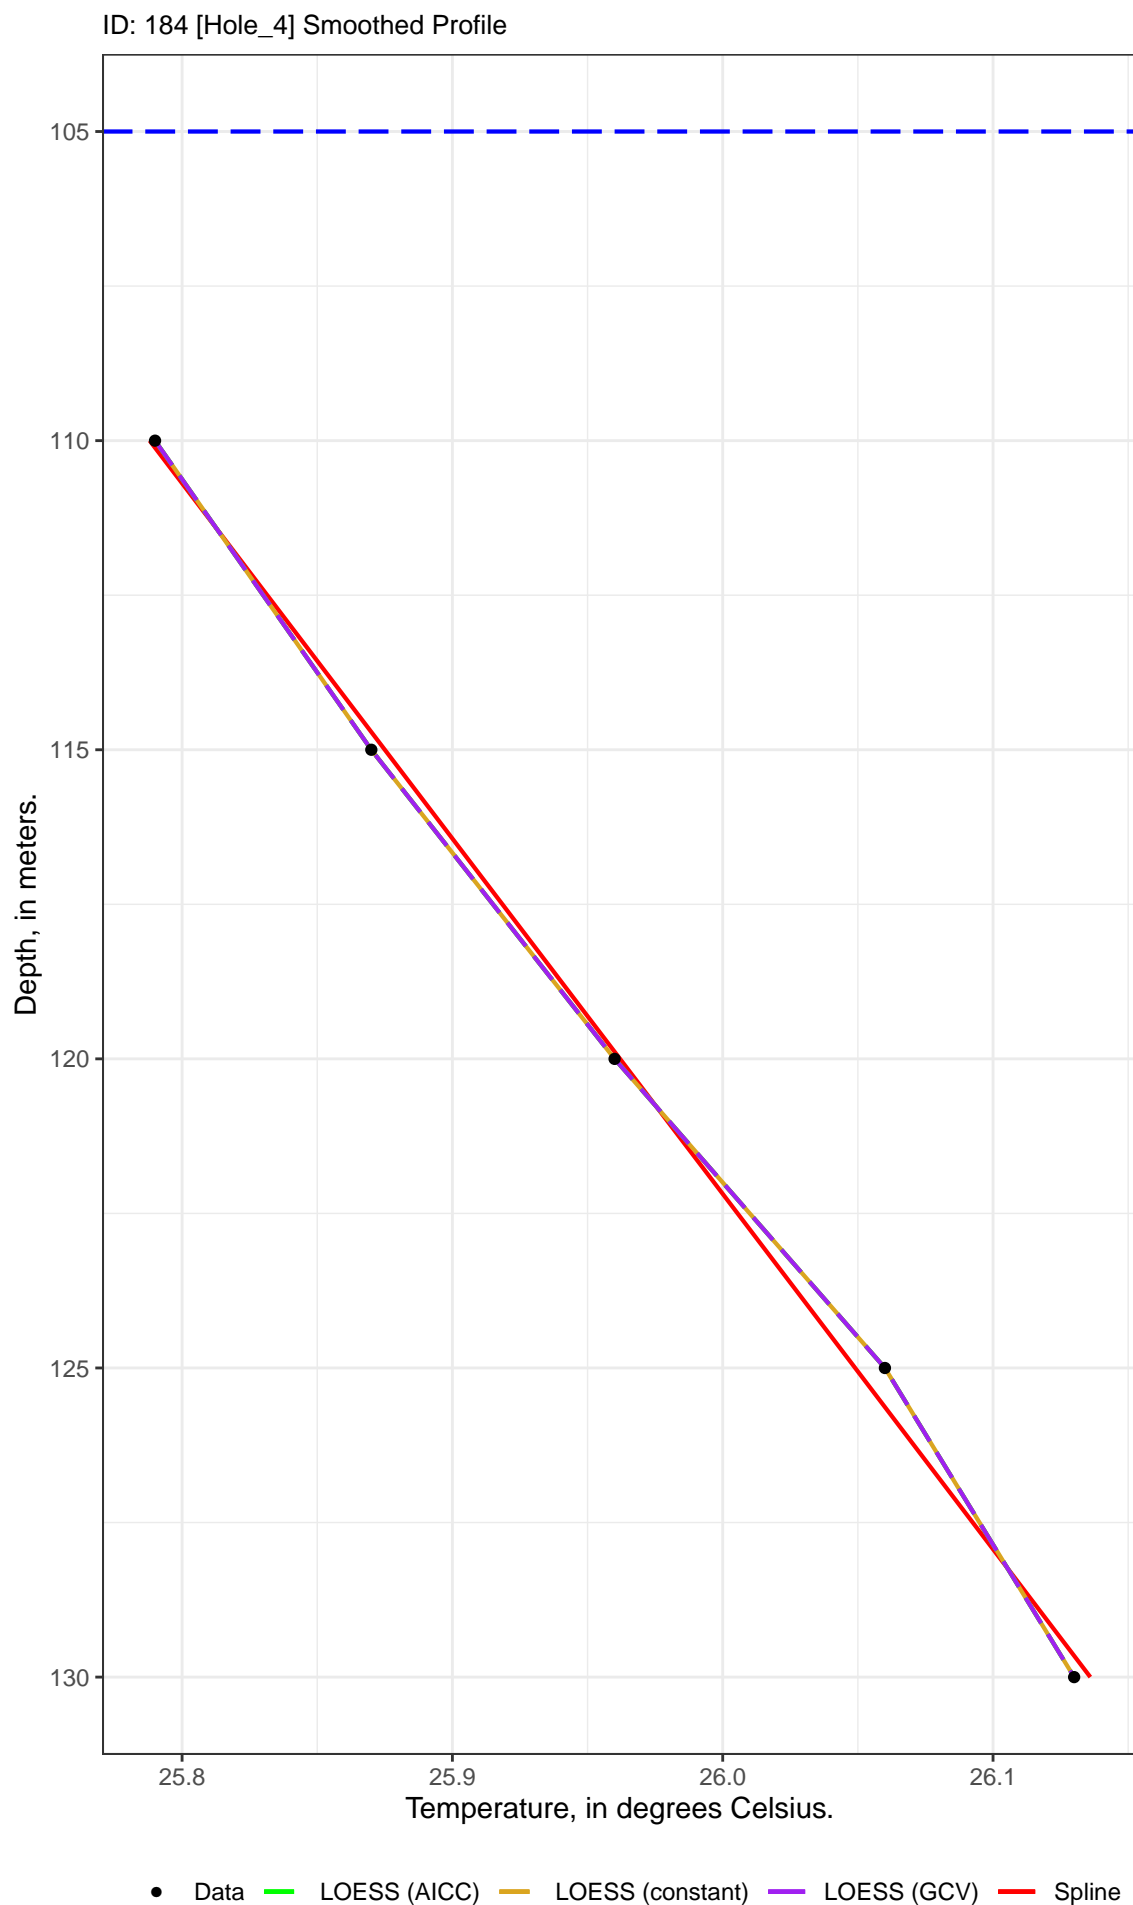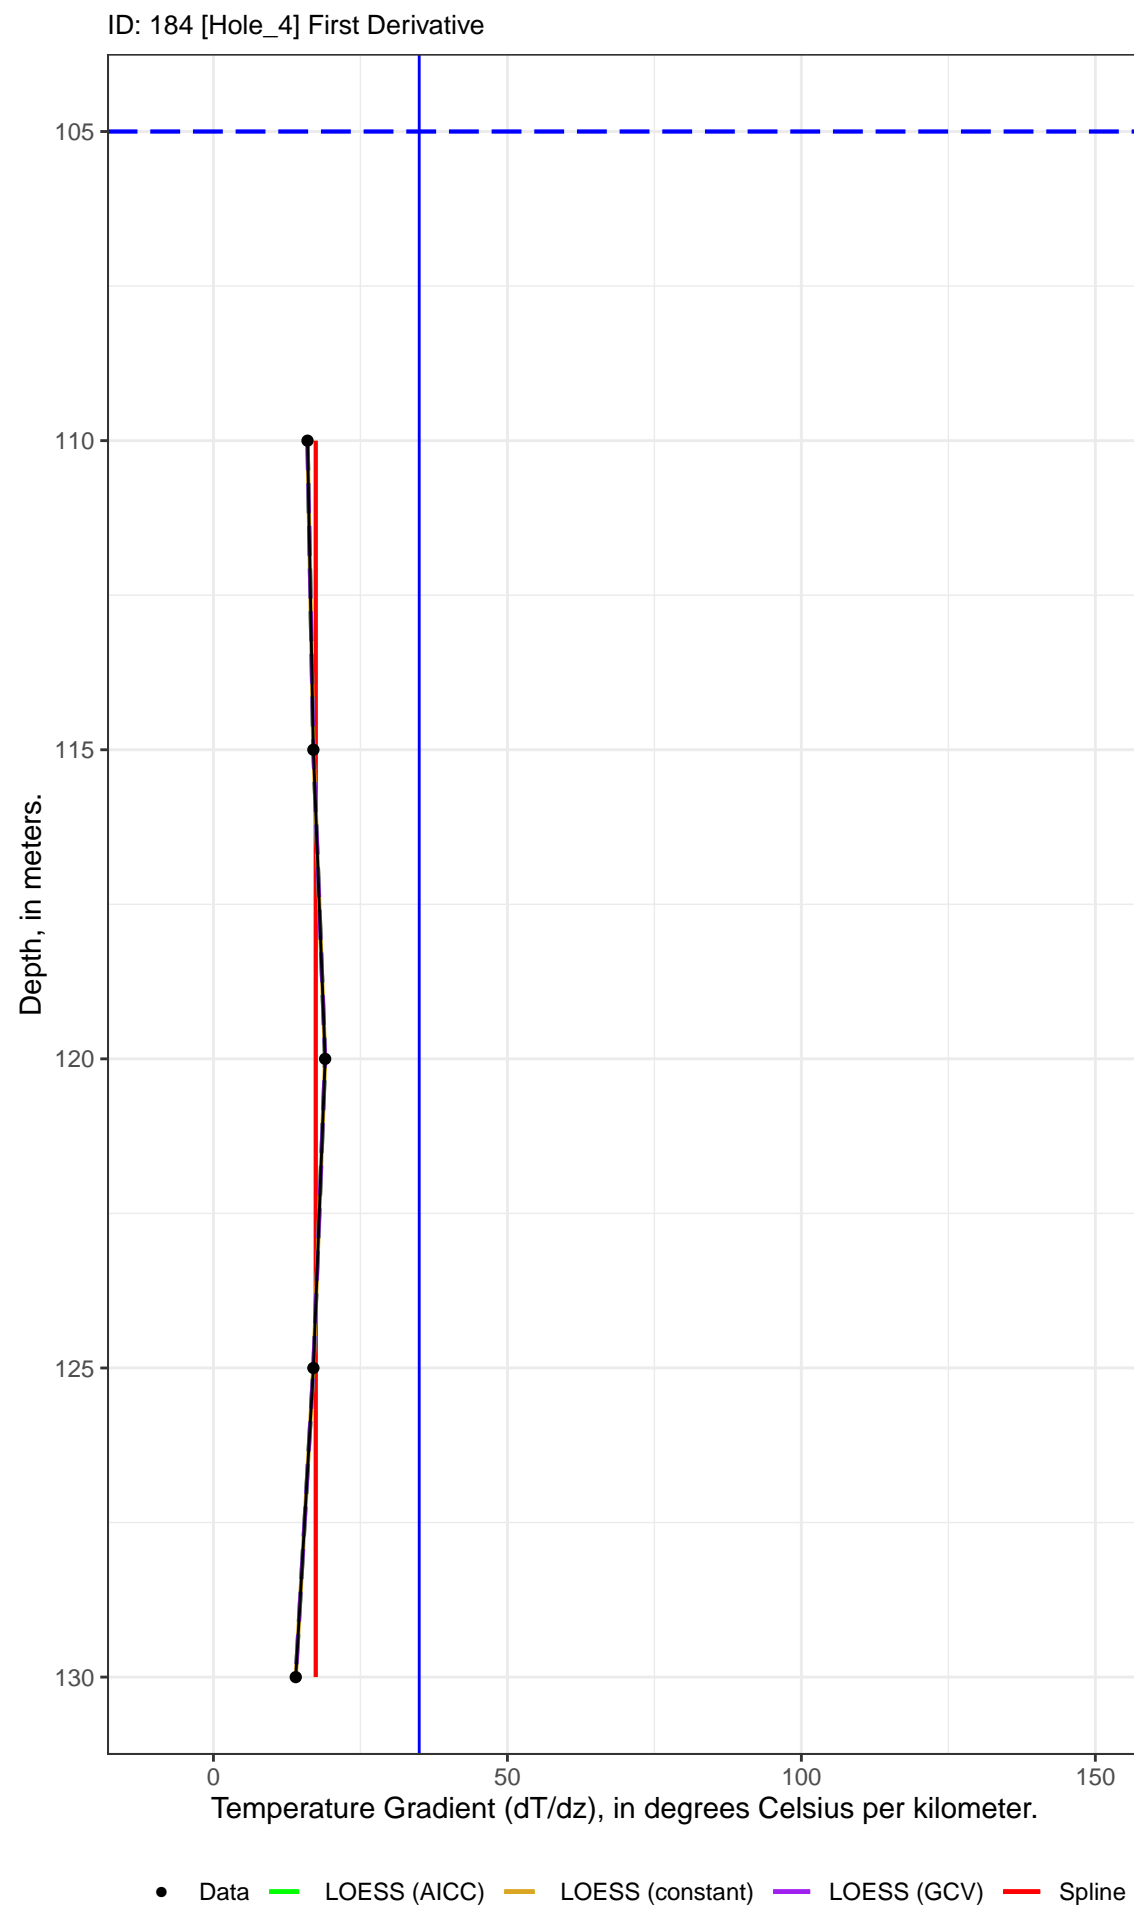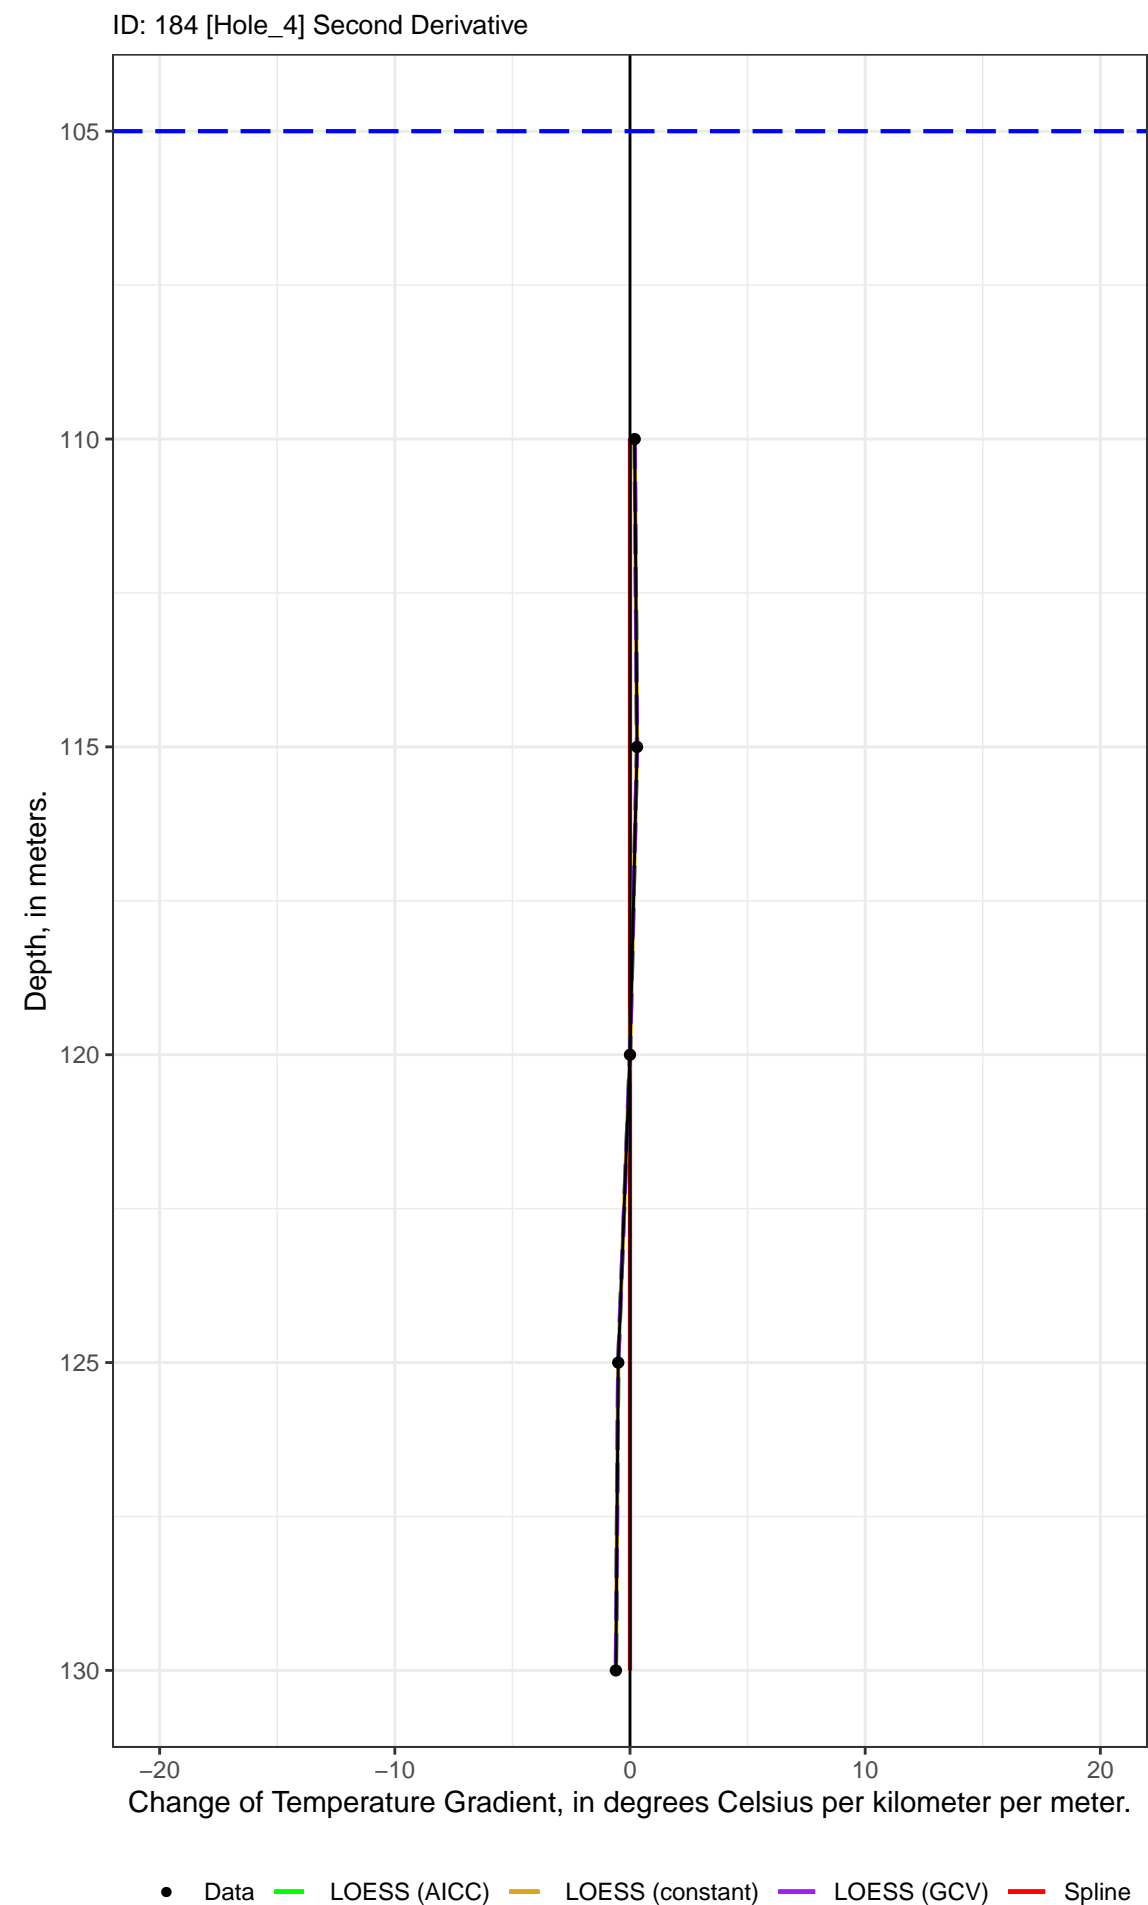

ID: 186 [ISC-1D] Smoothed Profile

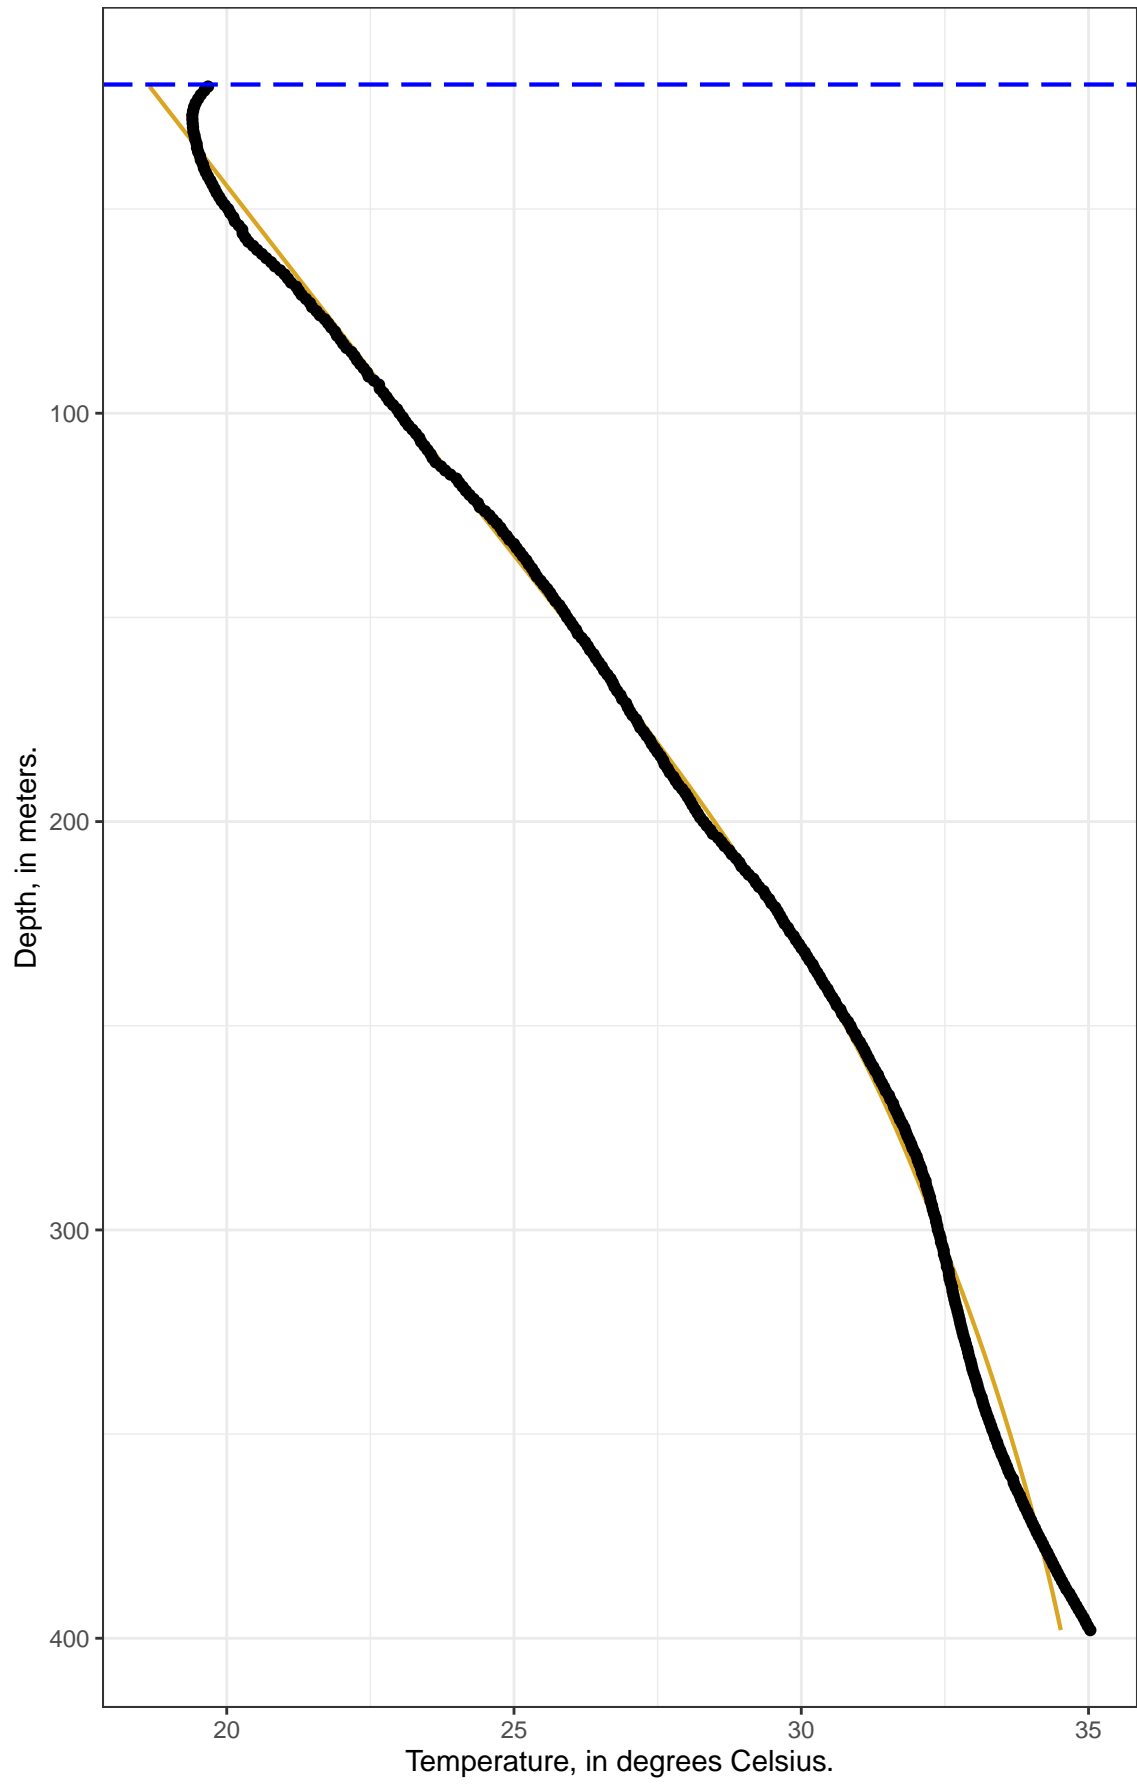

ID: 186 [ISC-1D] First Derivative

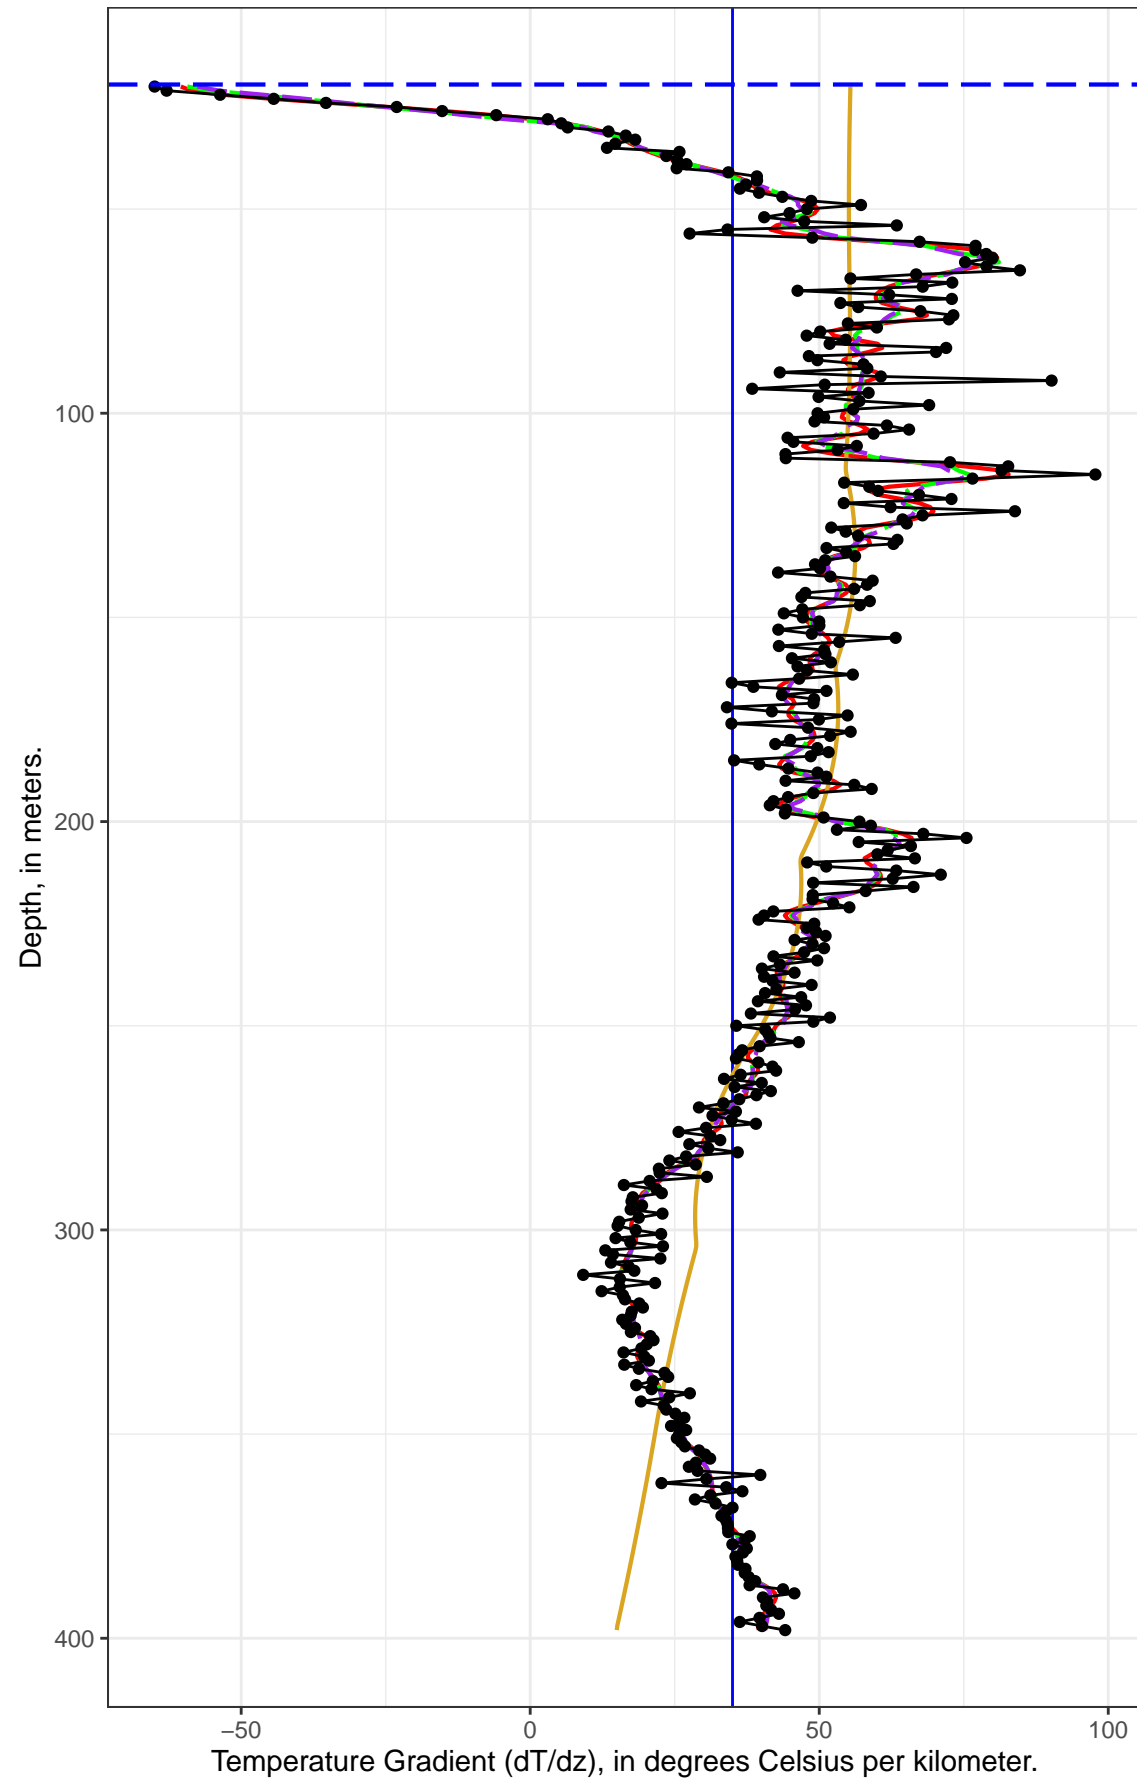

ID: 186 [ISC-1D] Second Derivative

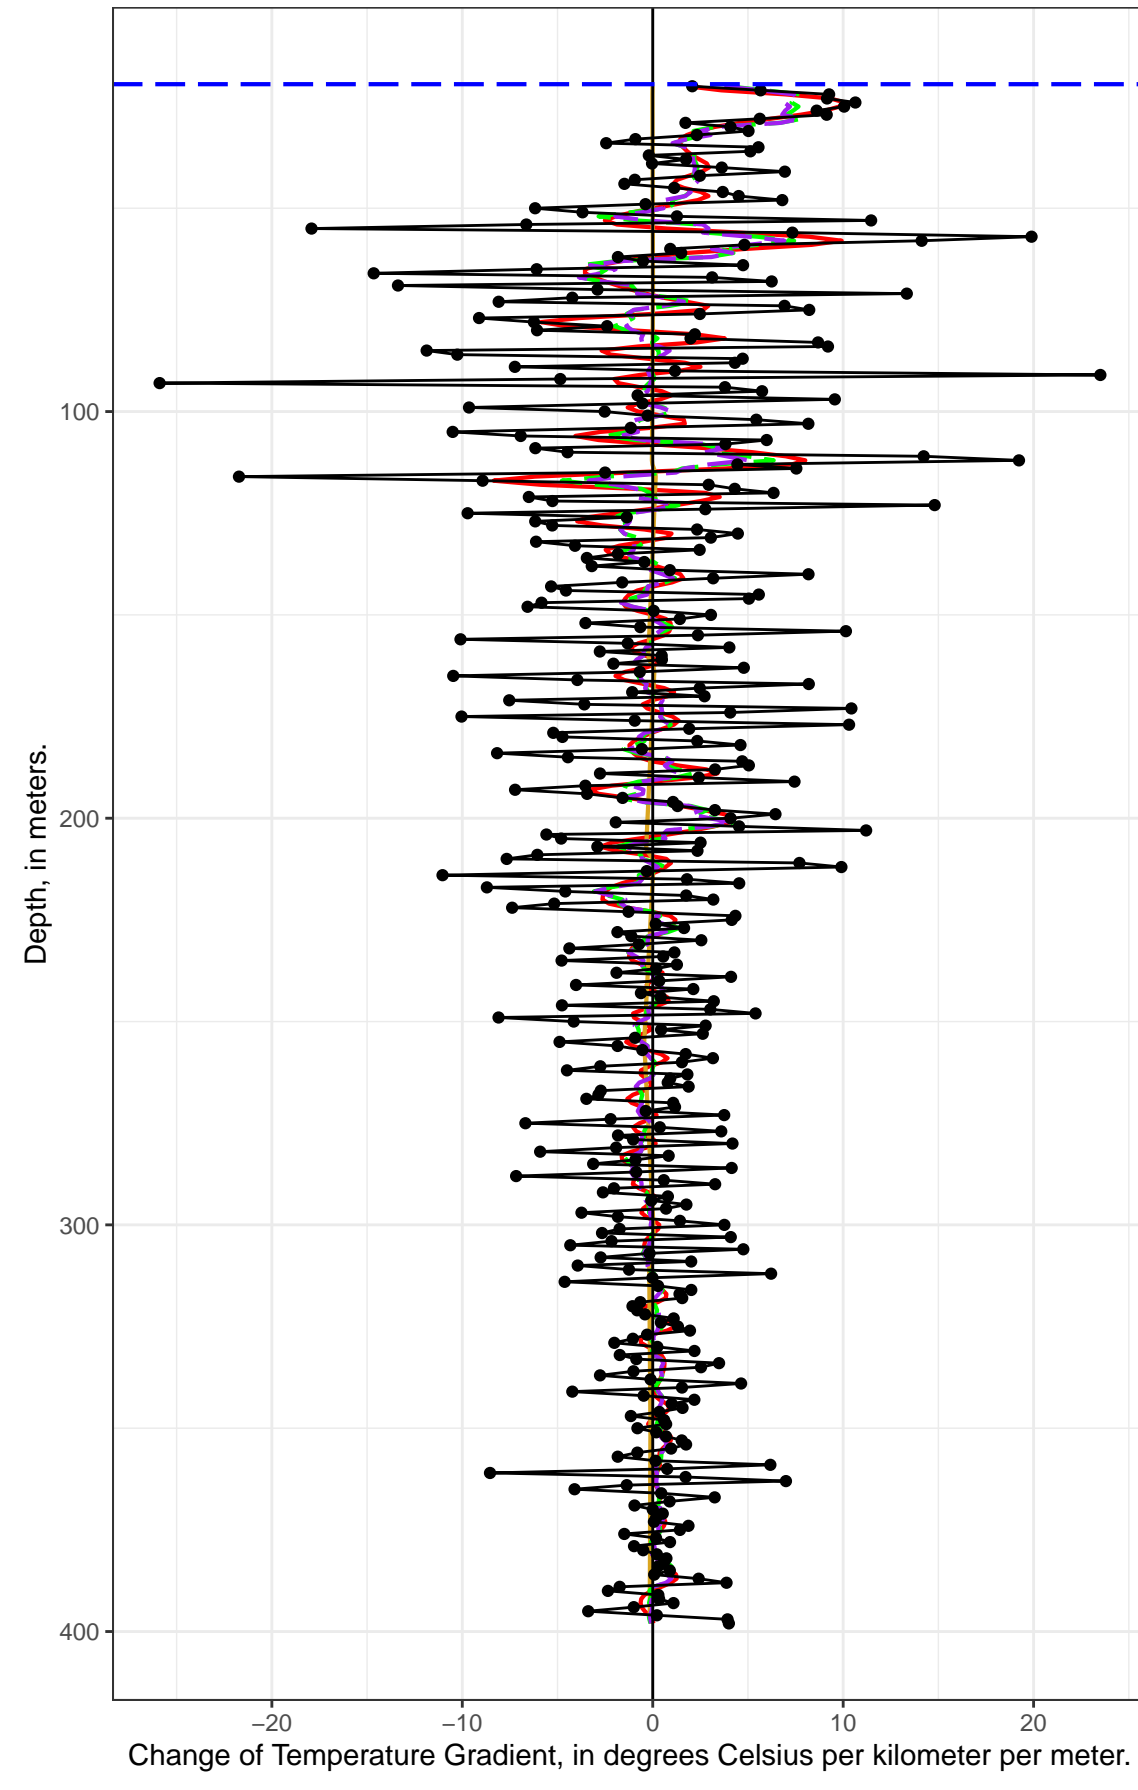

• Data • LOESS (AICC) • LOESS (constant) • LOESS (GCV) • Spline

• Data • LOESS (AICC) • LOESS (constant) • LOESS (GCV) • Spline

• Data • LOESS (AICC) • LOESS (constant) • LOESS (GCV) • Spline

ID: 187 [ISC-2\_160] Smoothed Profile

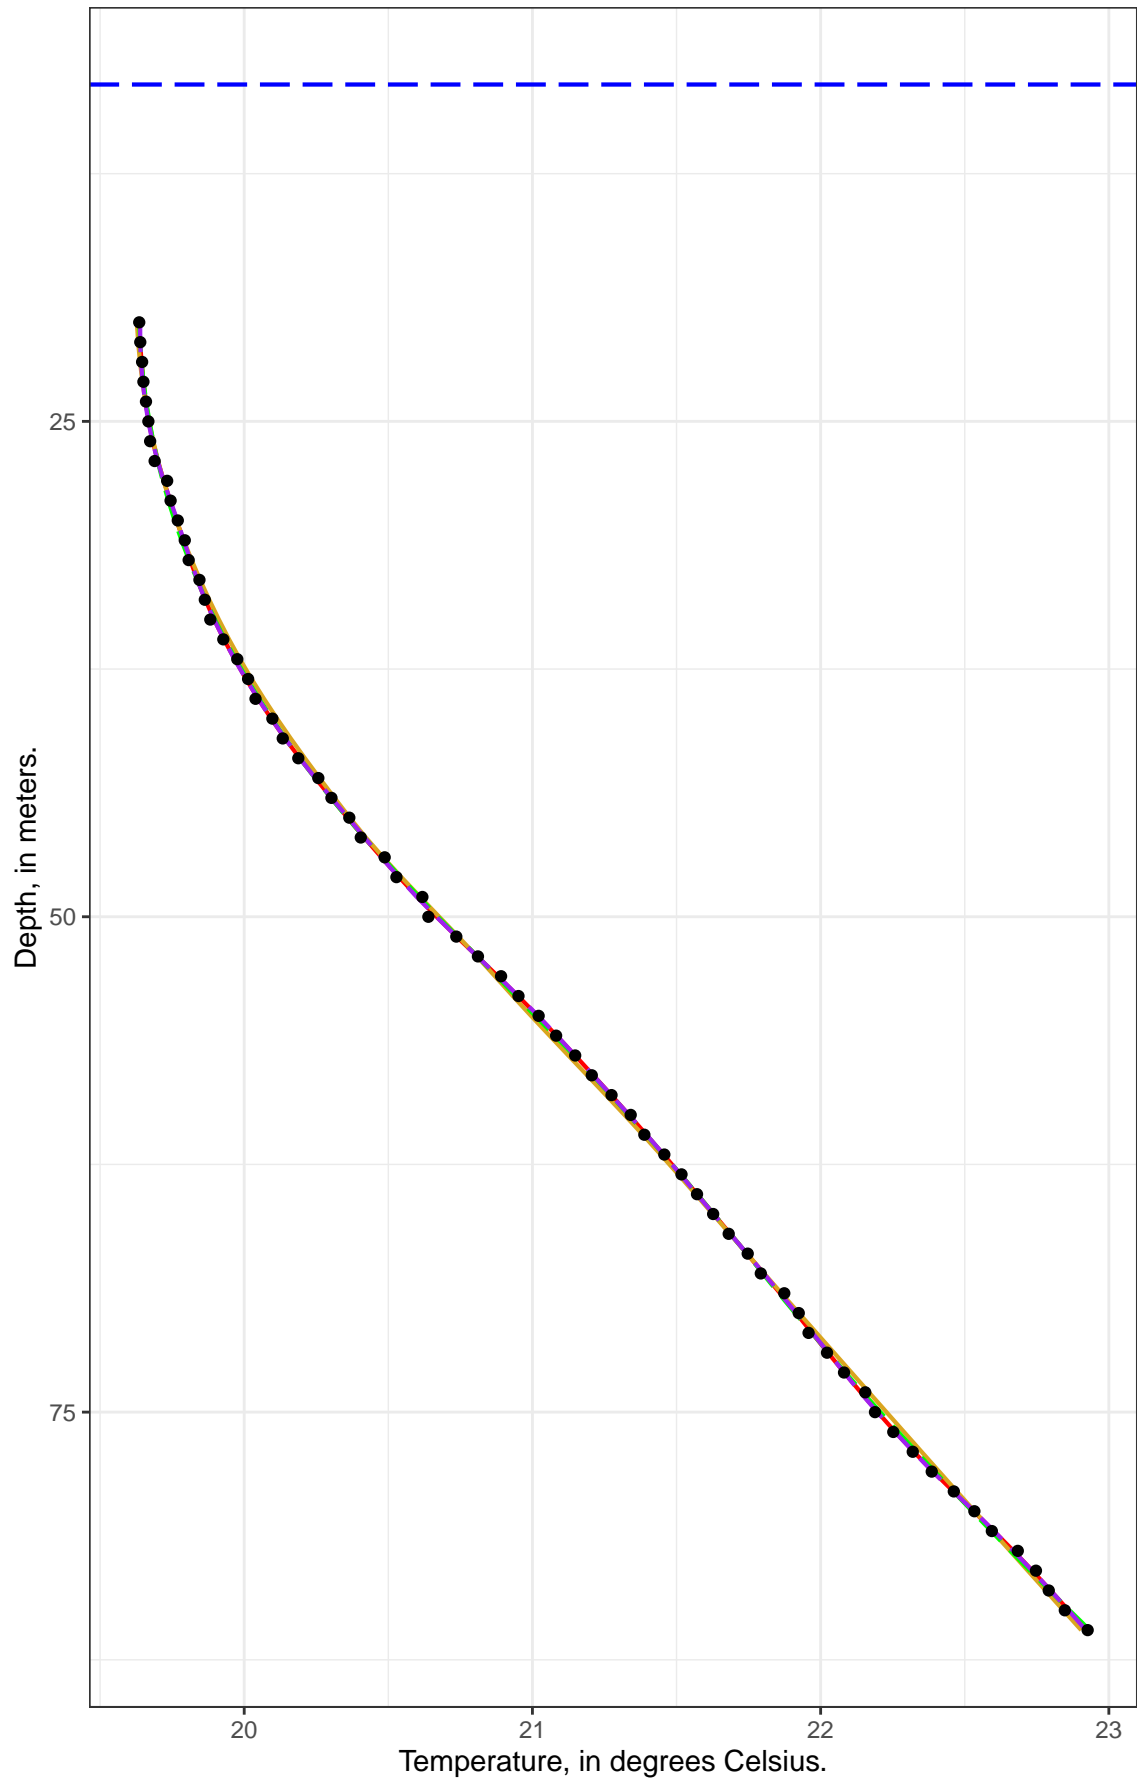

• Data — LOESS (AICC) — LOESS (constant) — LOESS (GCV) — Spline

ID: 187 [ISC-2\_160] First Derivative

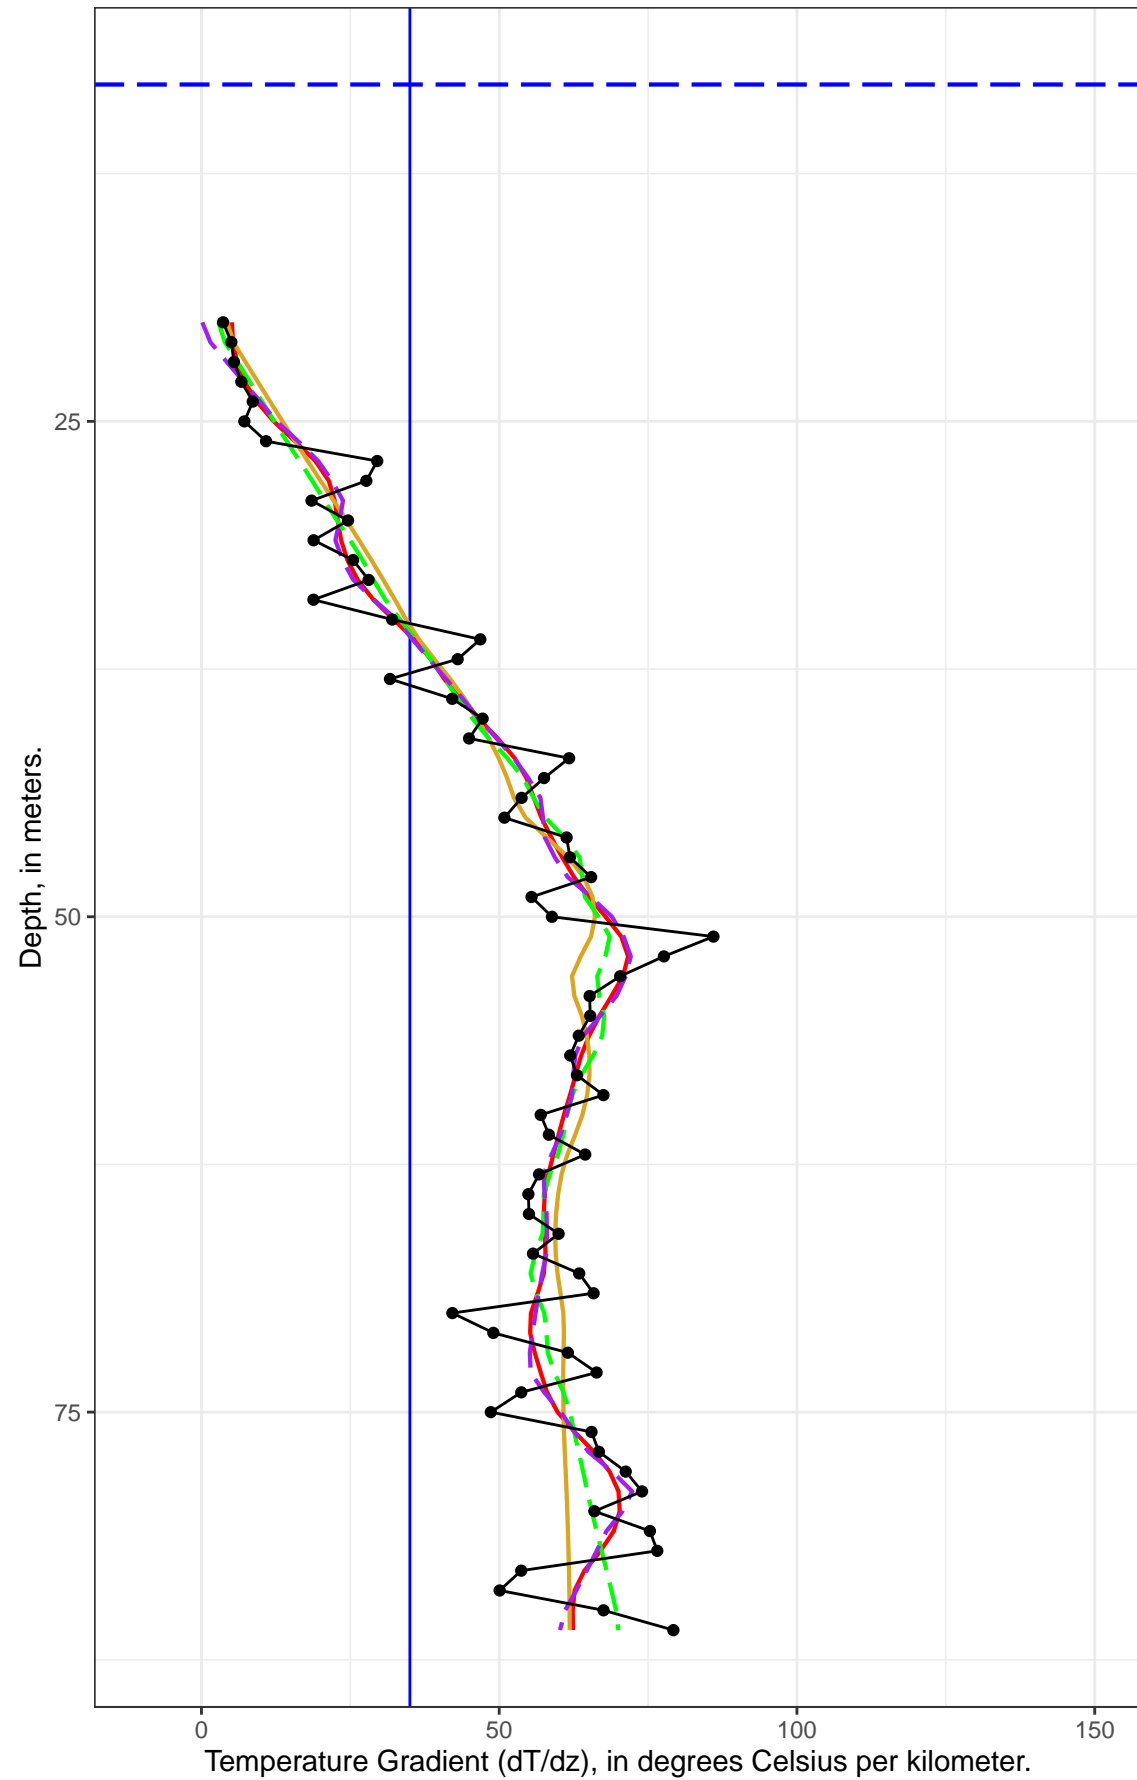

• Data — LOESS (AICC) — LOESS (constant) — LOESS (GCV) — Spline

ID: 187 [ISC-2\_160] Second Derivative

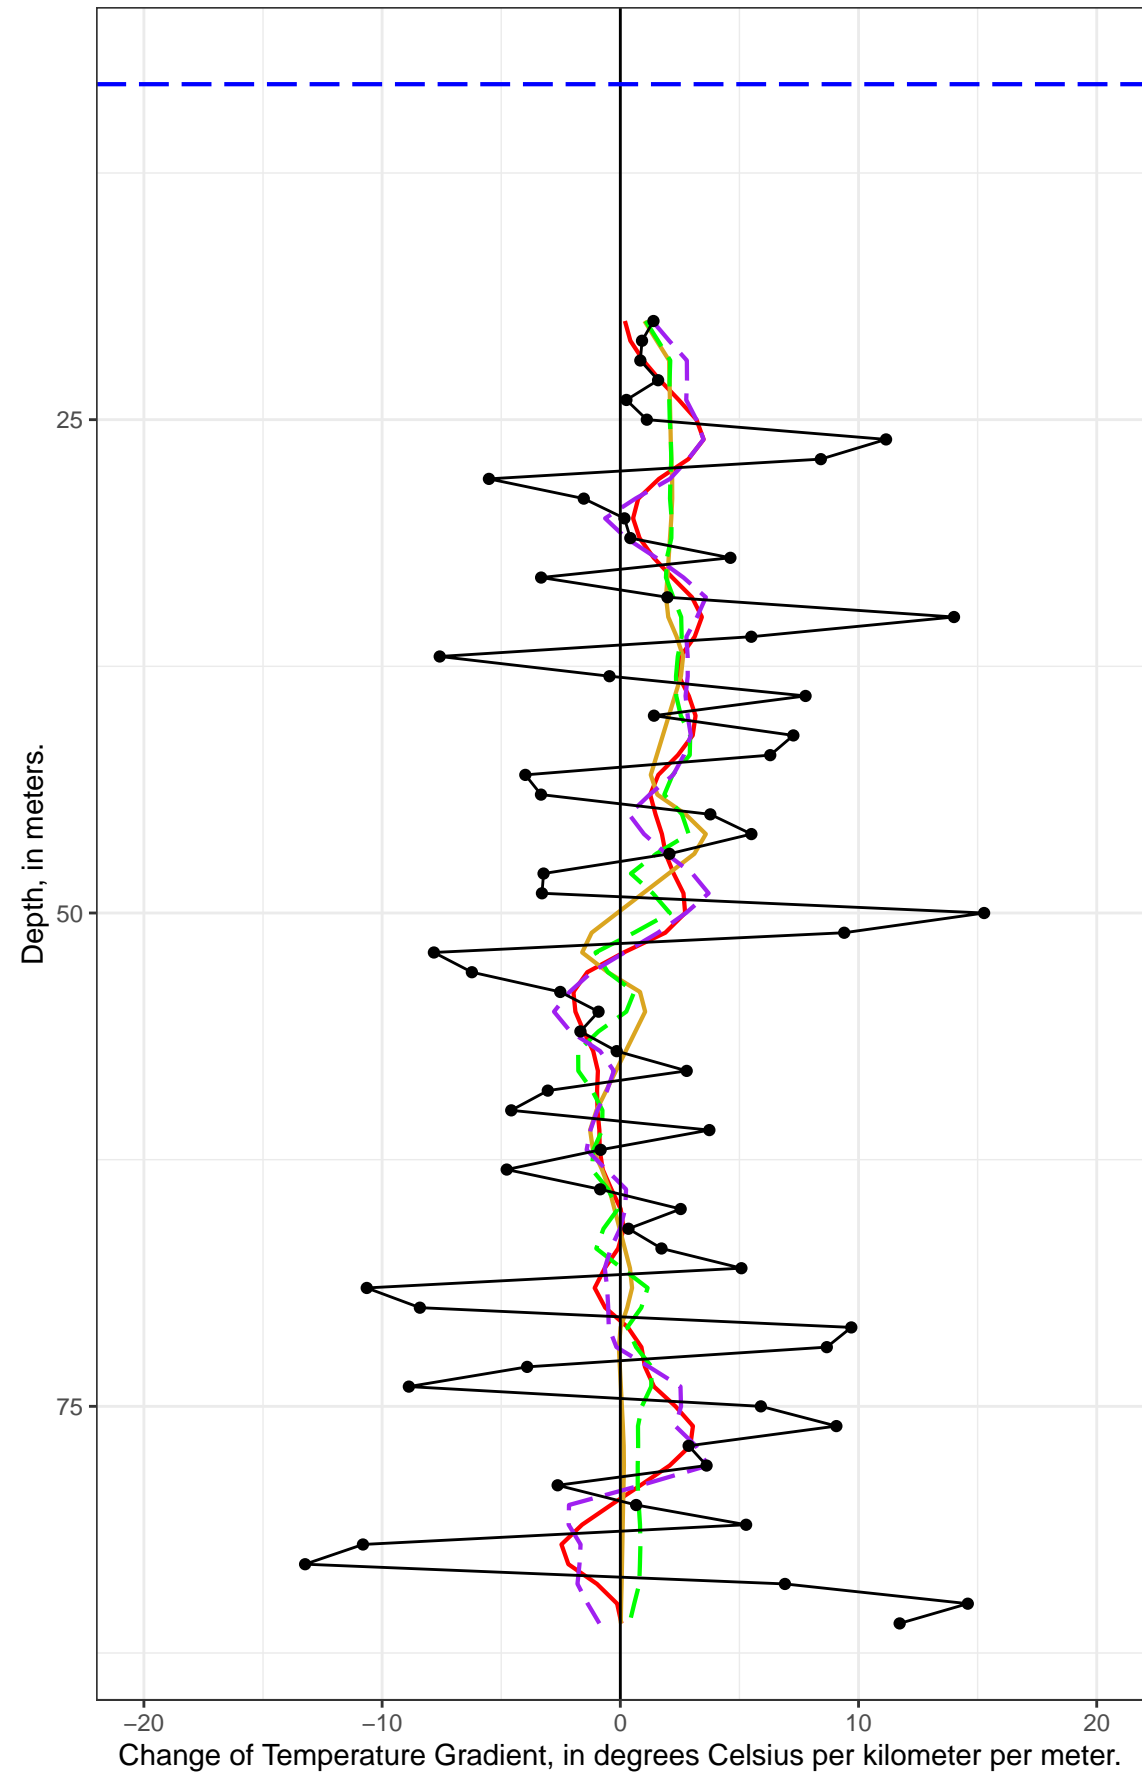

• Data — LOESS (AICC) — LOESS (constant) — LOESS (GCV) — Spline

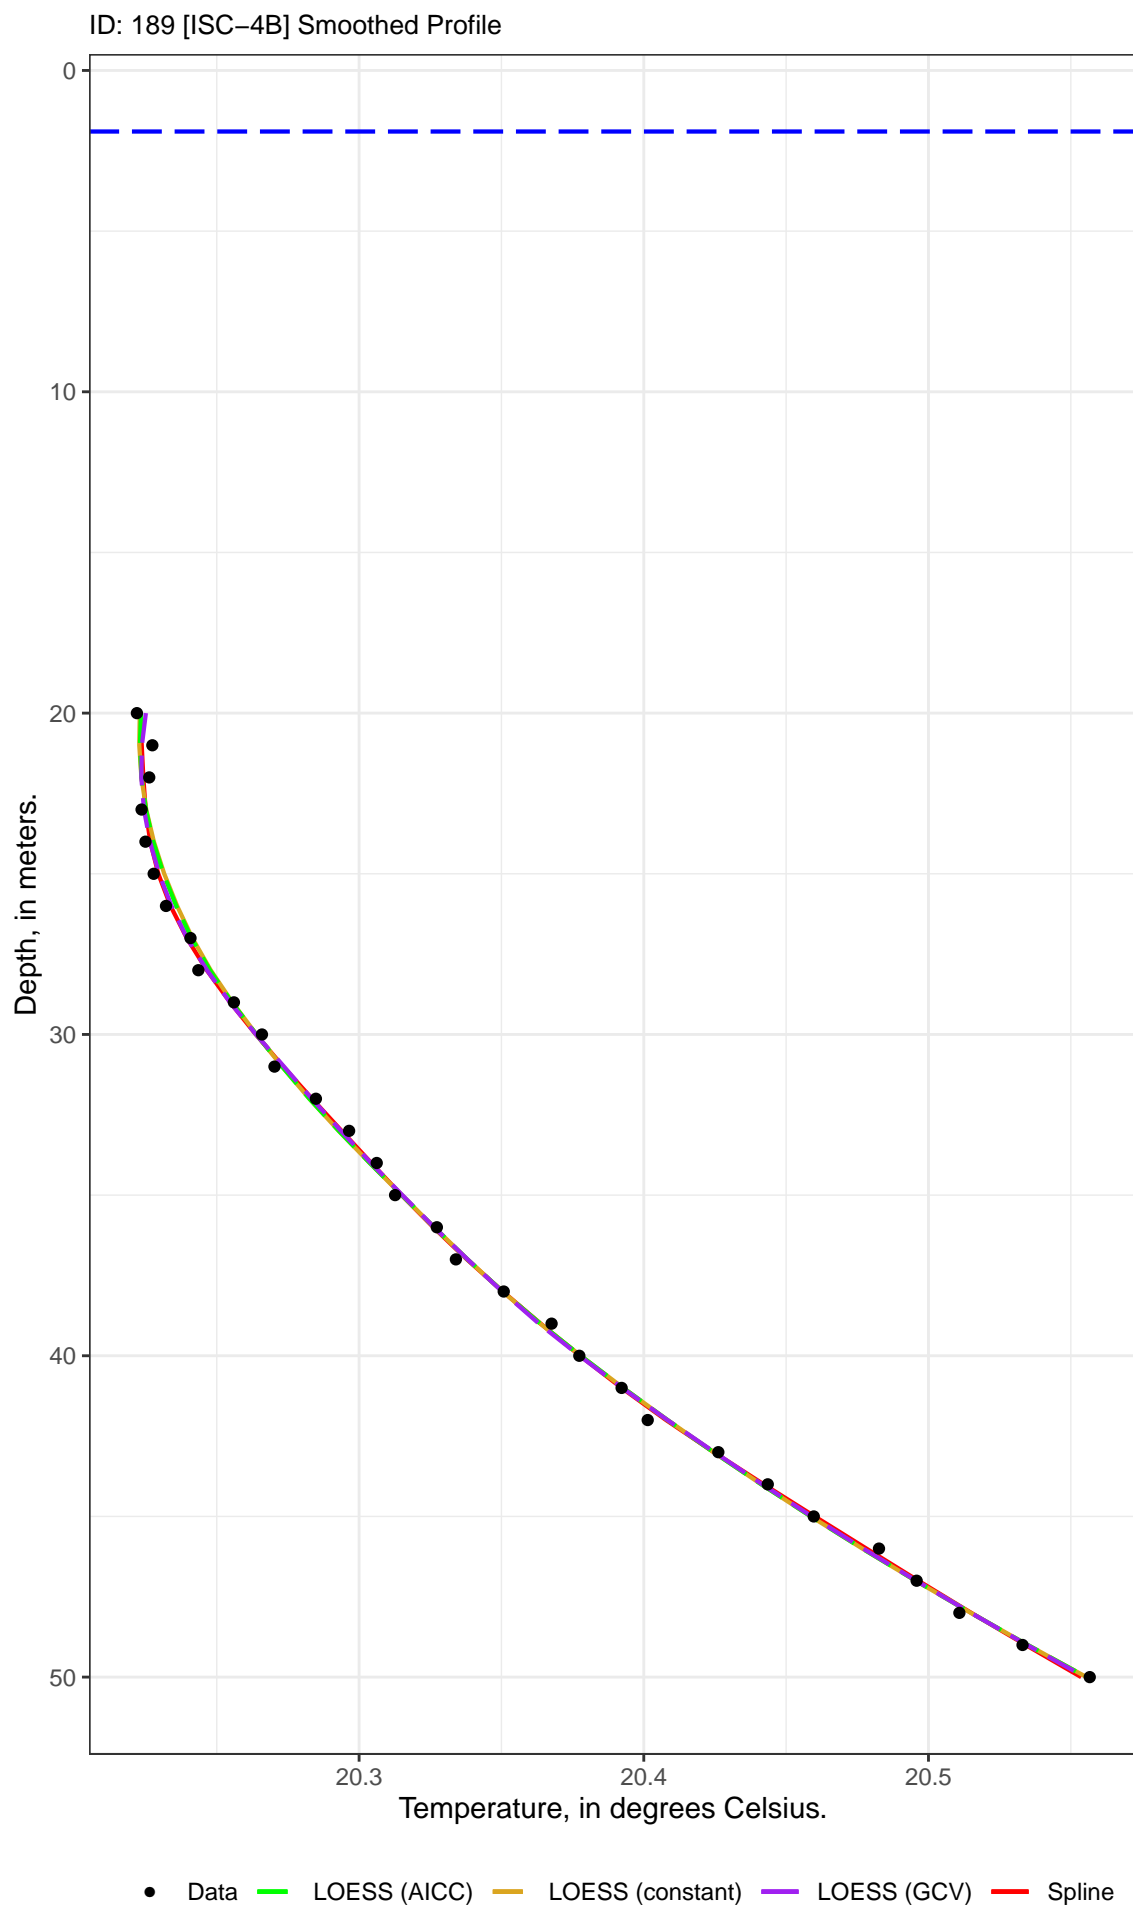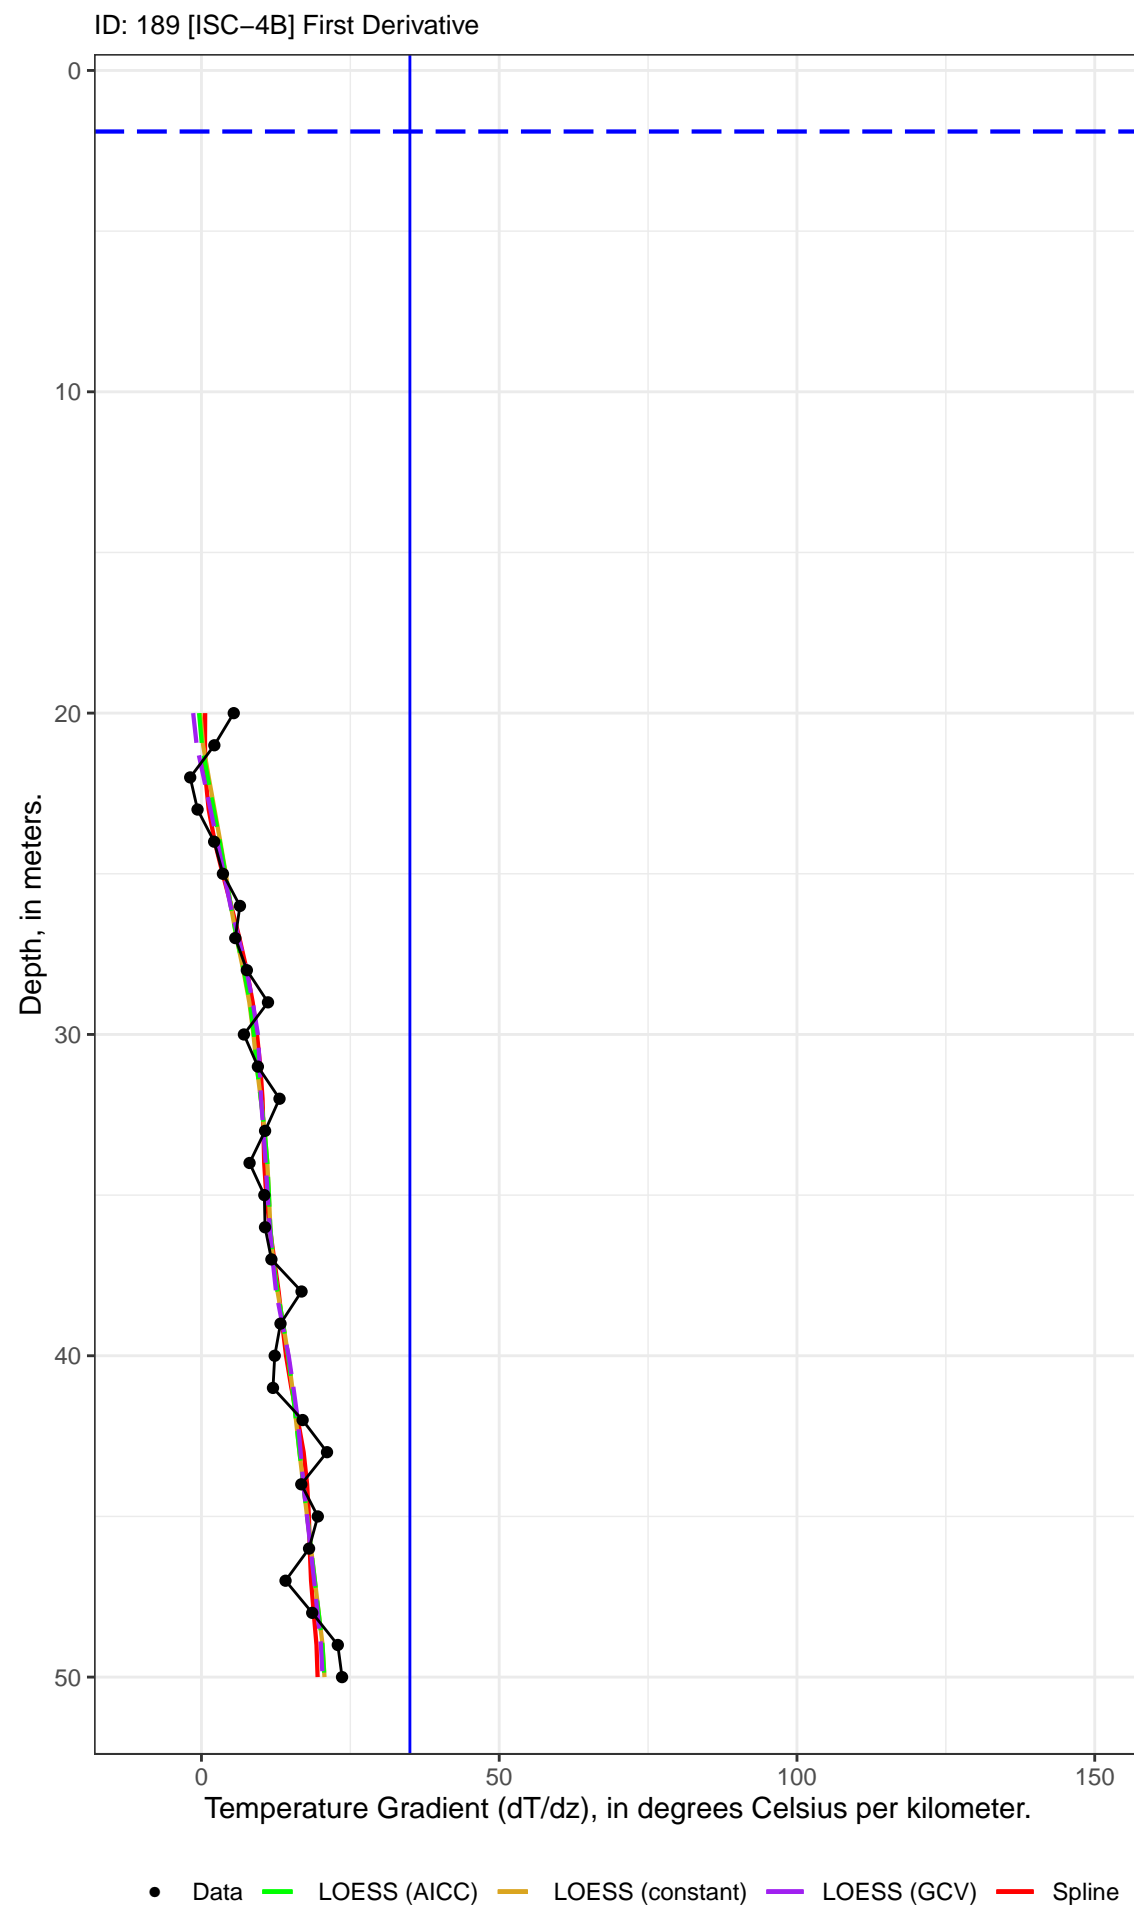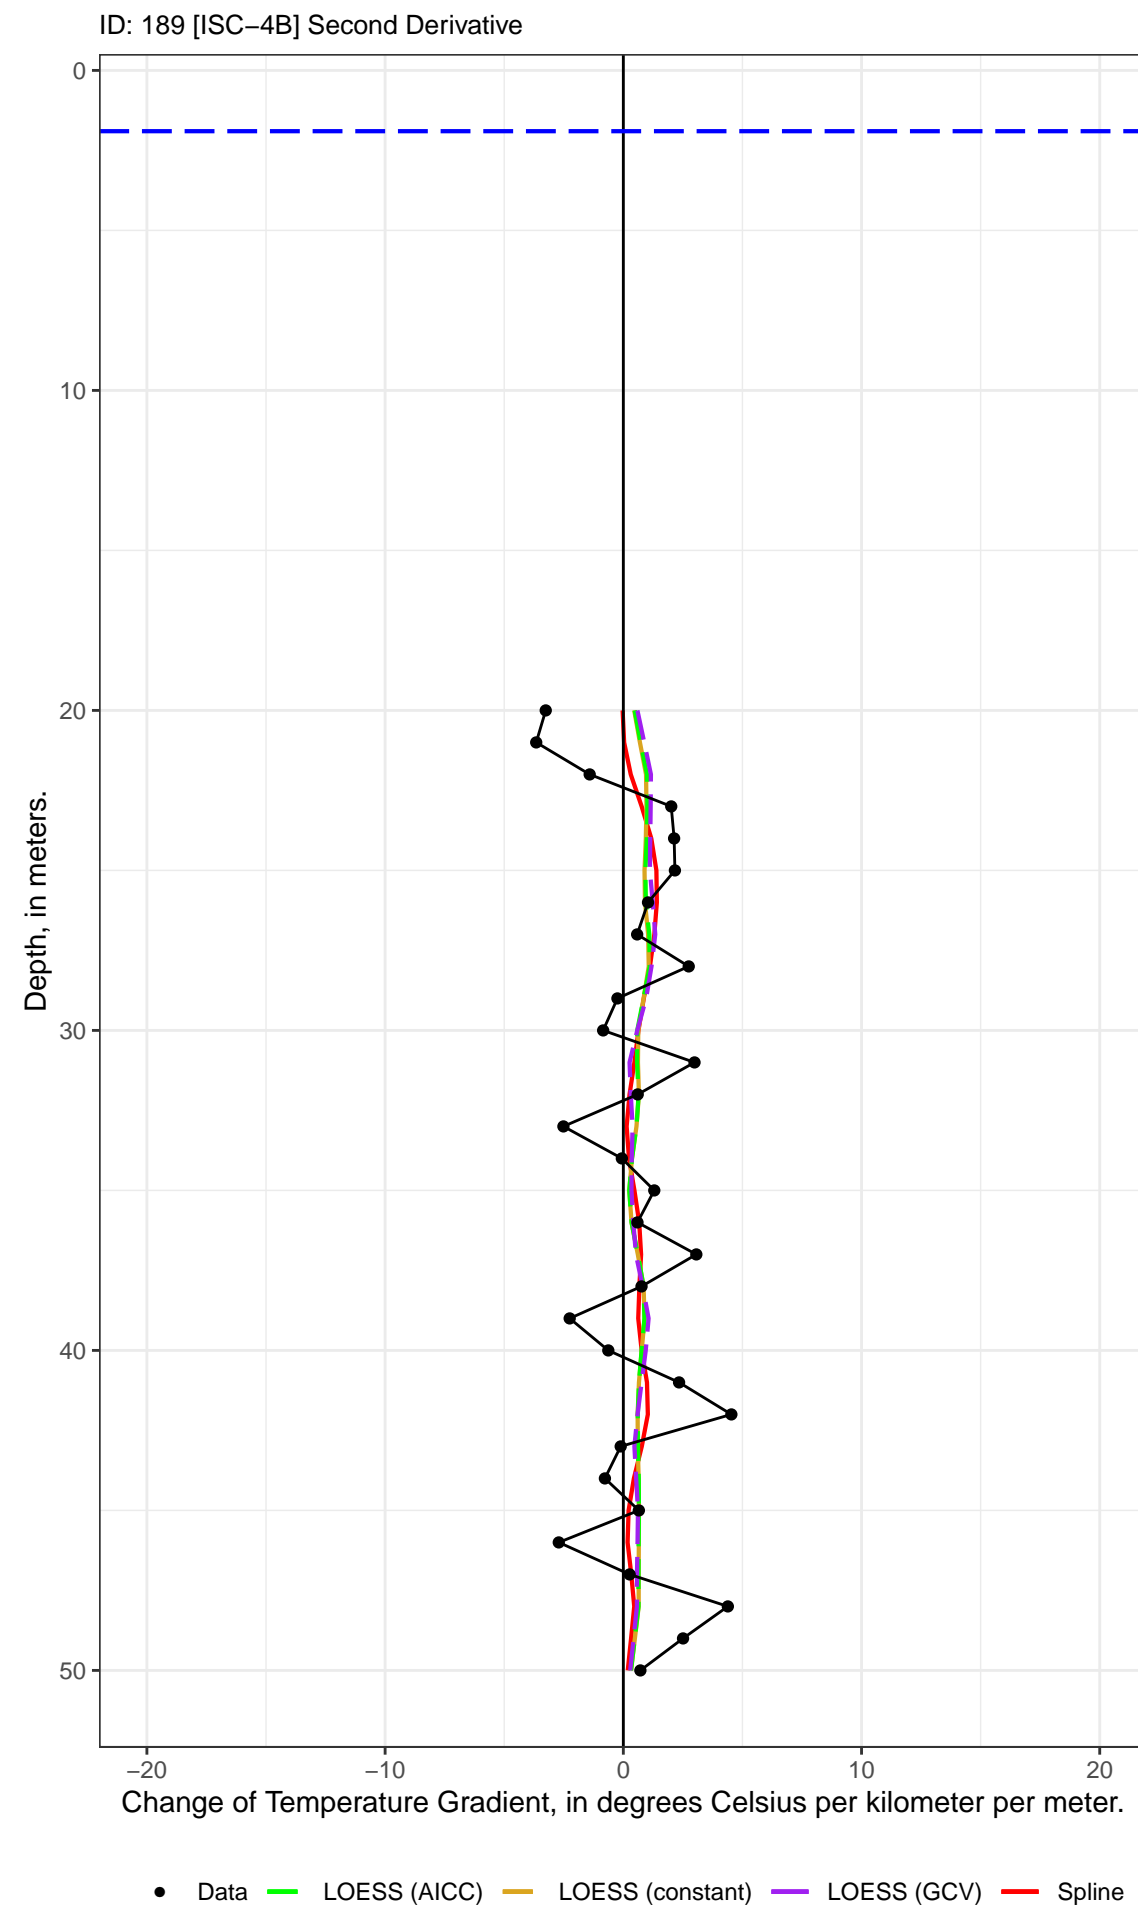



ID: 190 [ISC-7B] Smoothed Profile

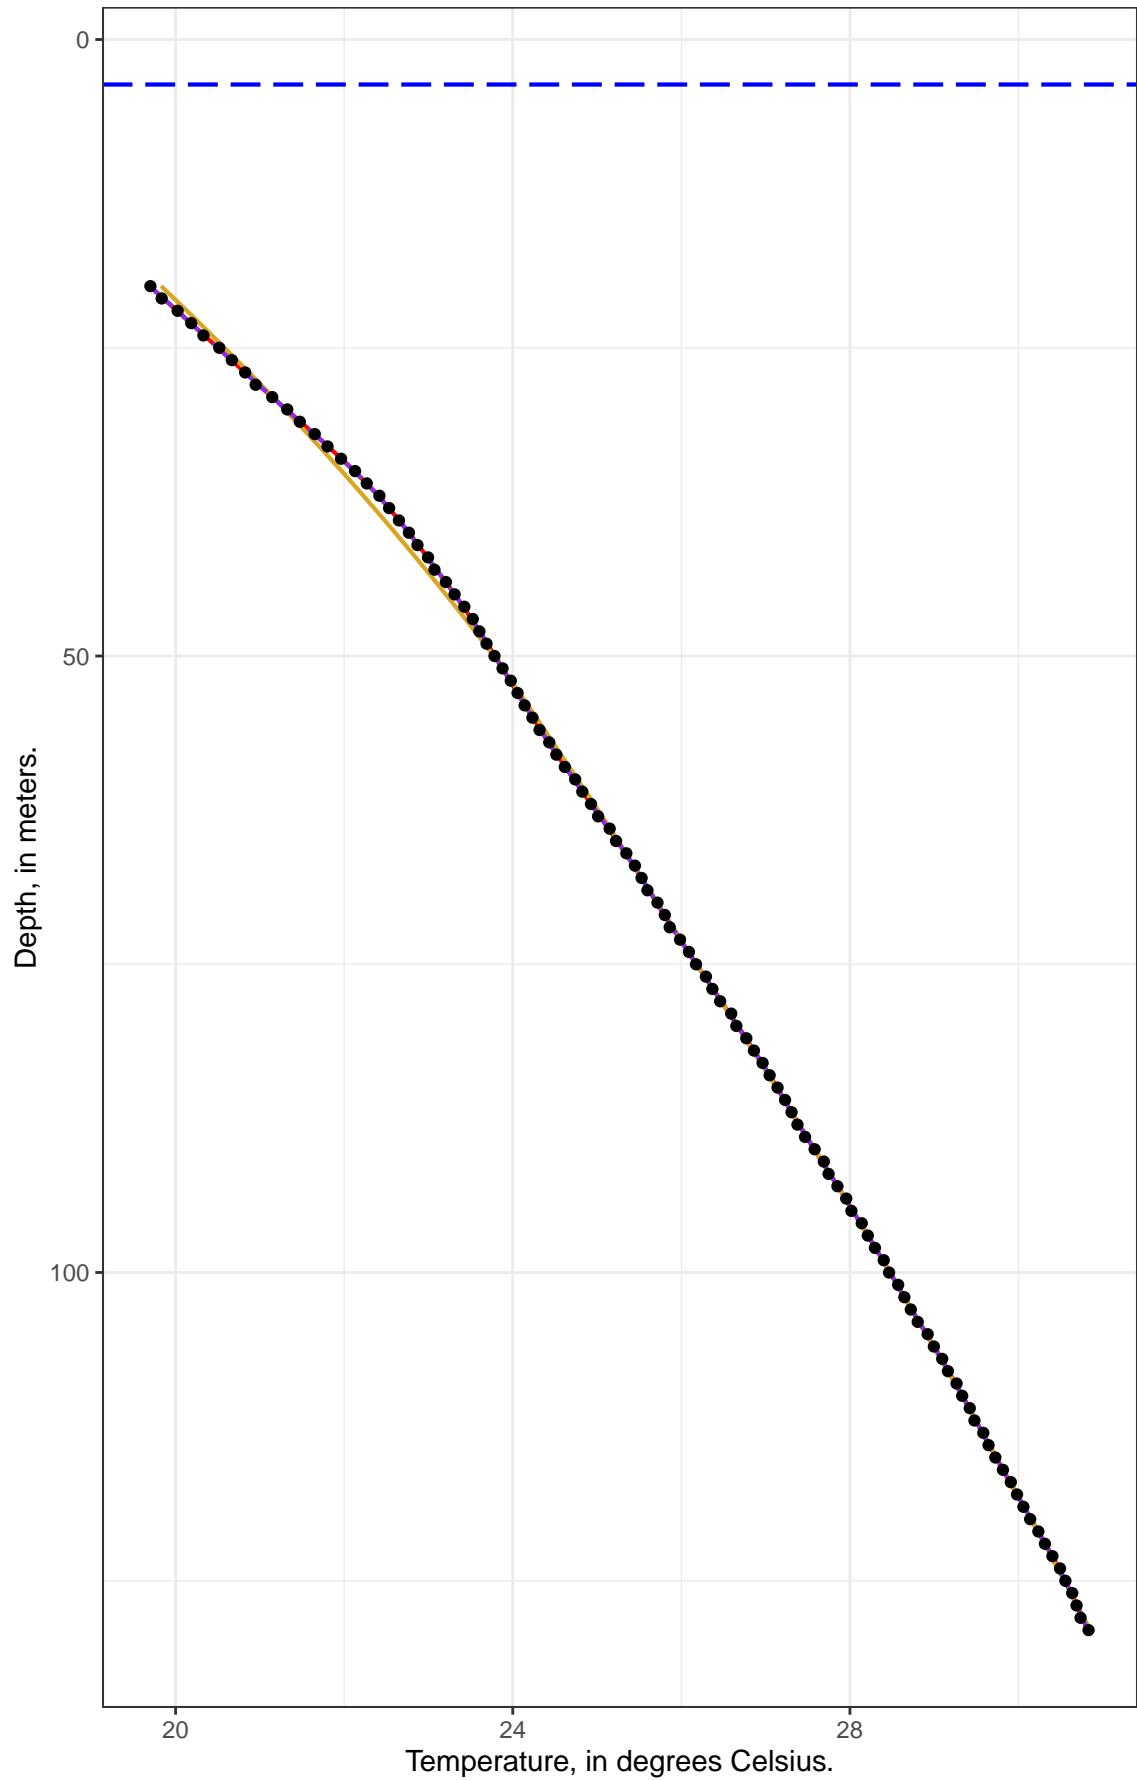

ID: 190 [ISC-7B] First Derivative

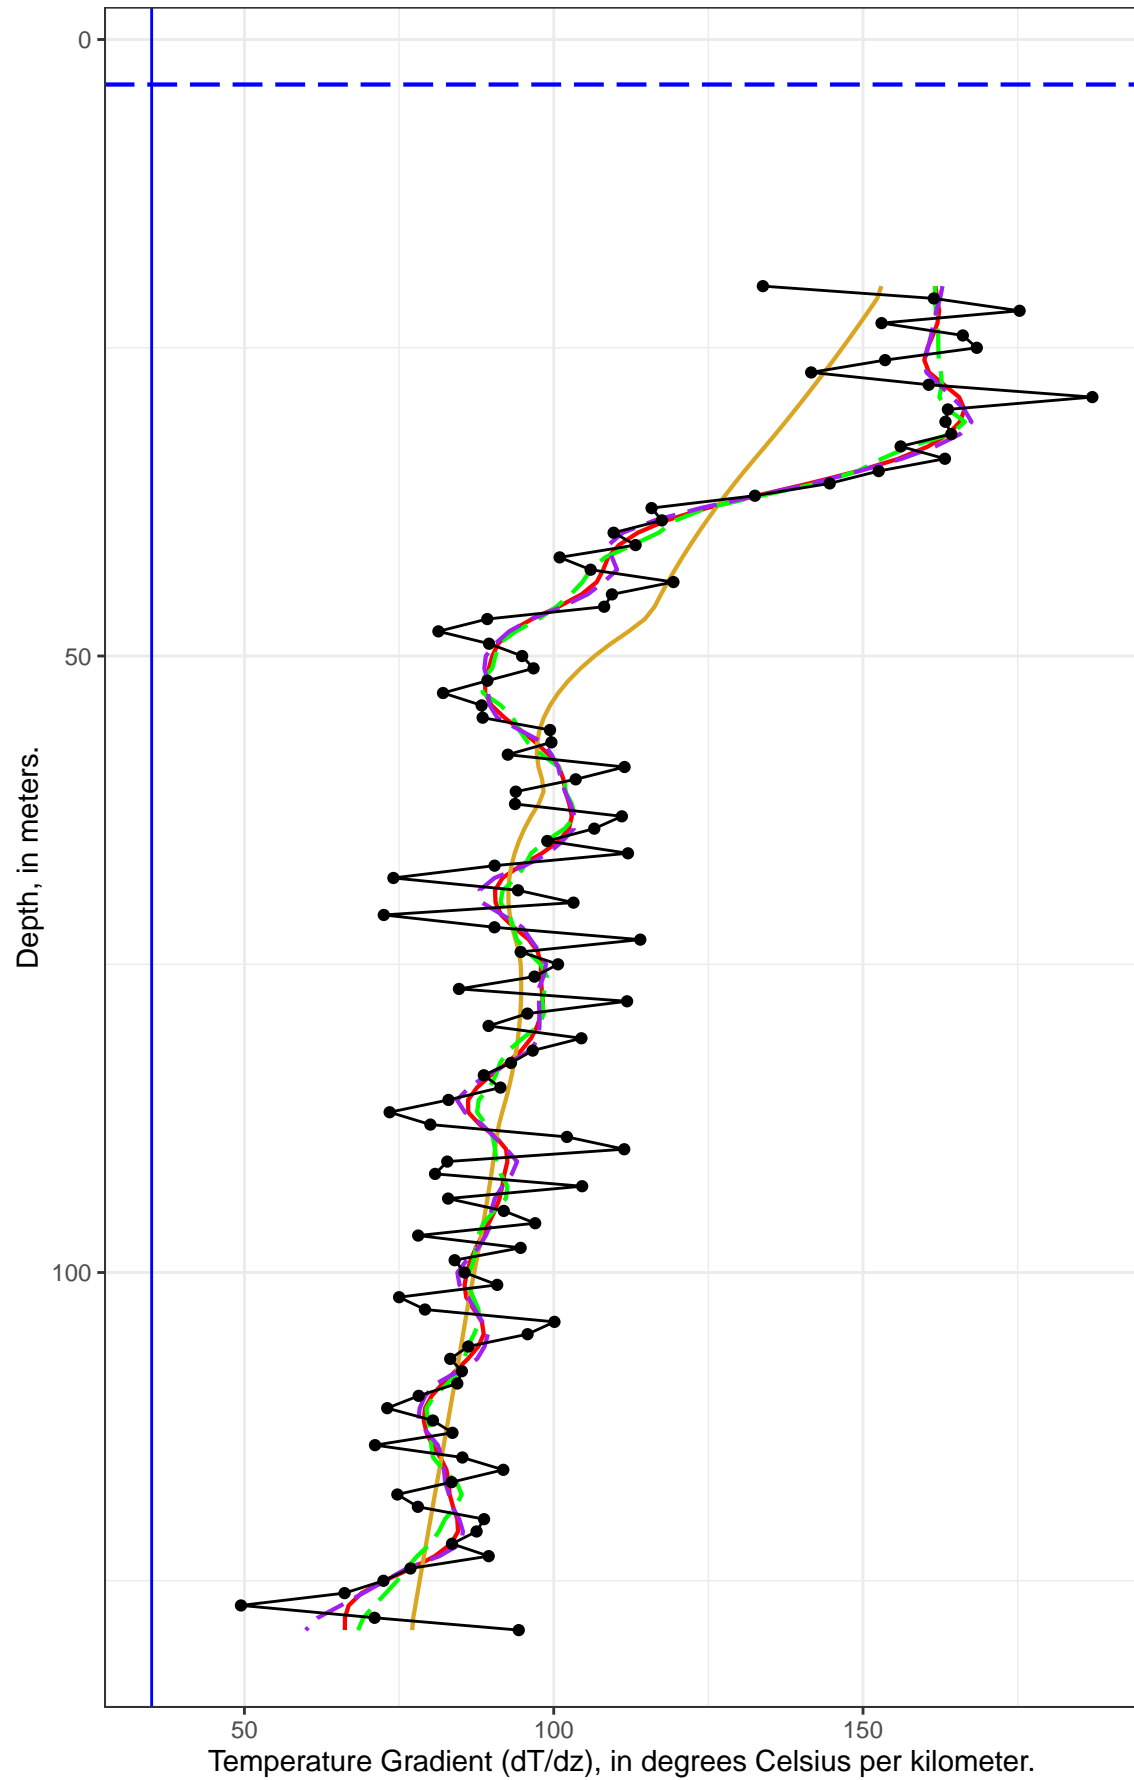

ID: 190 [ISC-7B] Second Derivative

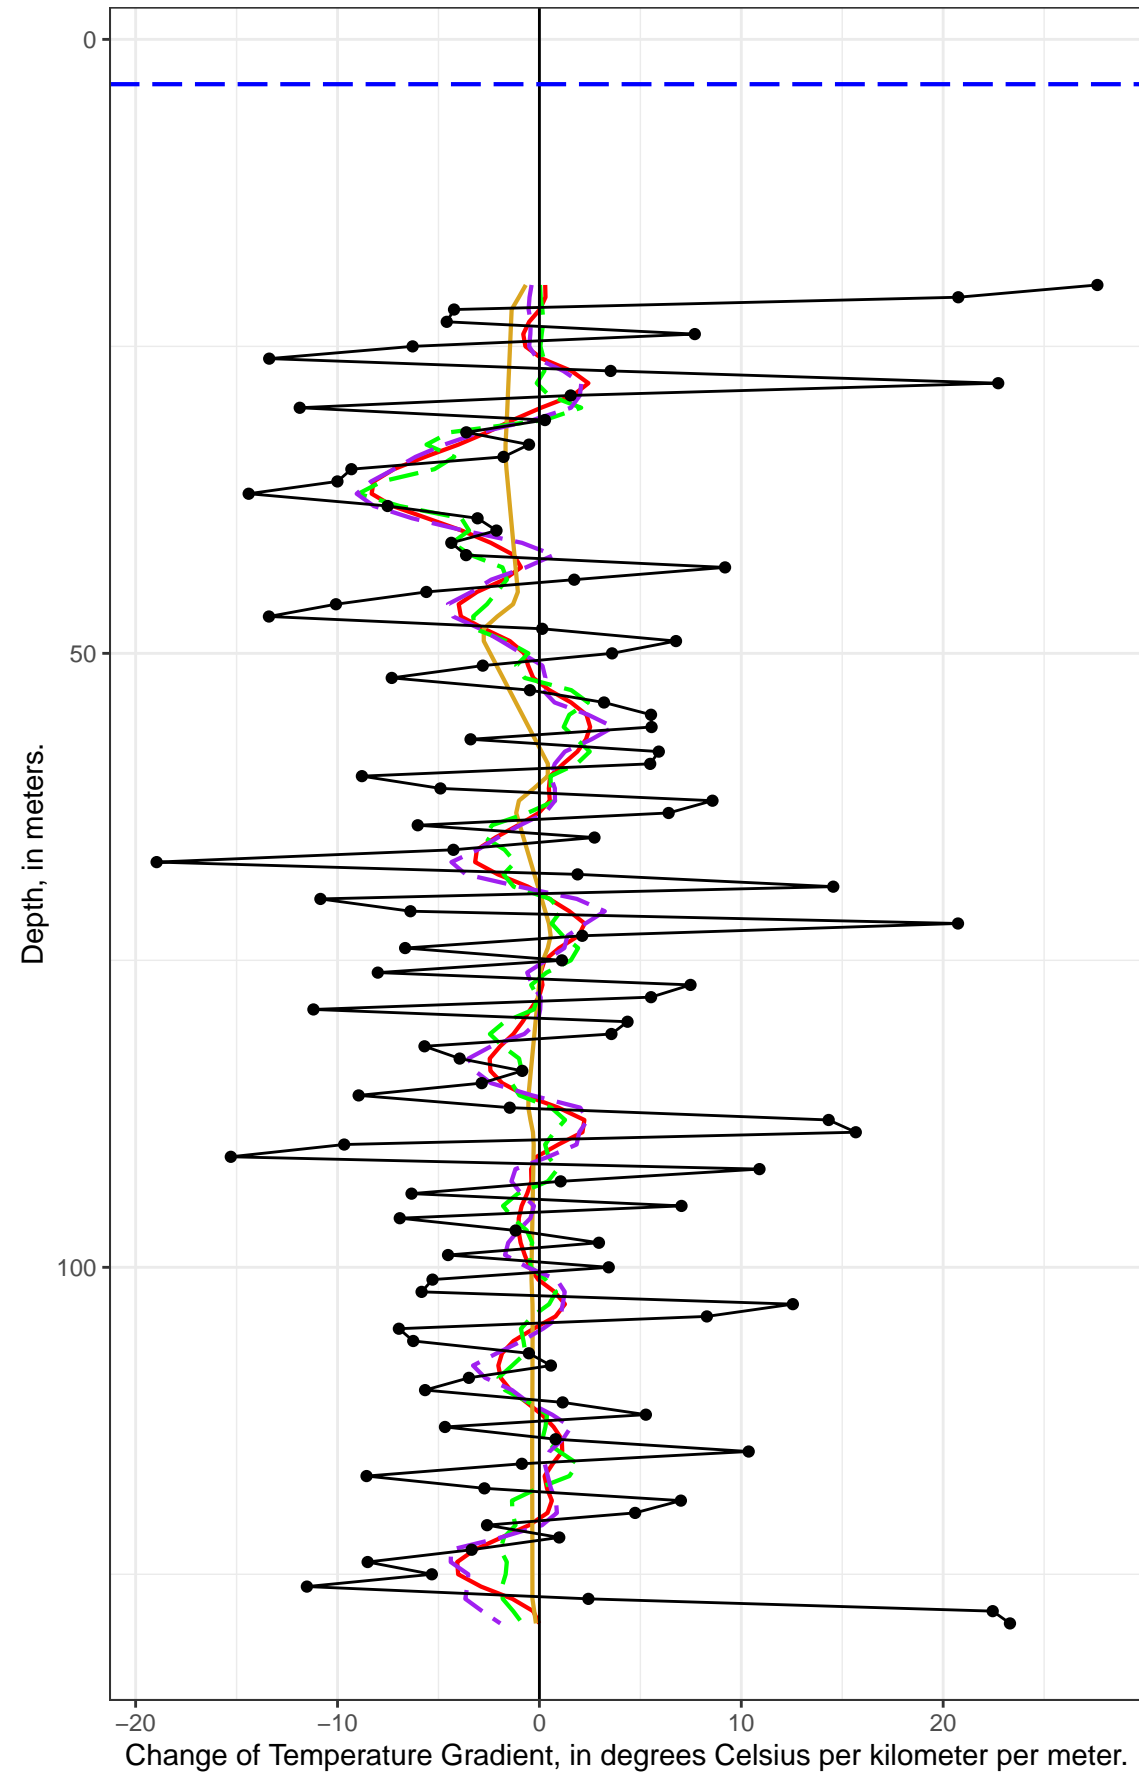

• Data • LOESS (AICC) • LOESS (constant) • LOESS (GCV) • Spline

• Data • LOESS (AICC) • LOESS (constant) • LOESS (GCV) • Spline

• Data • LOESS (AICC) • LOESS (constant) • LOESS (GCV) • Spline

ID: 191 [LEP\_Well] Smoothed Profile

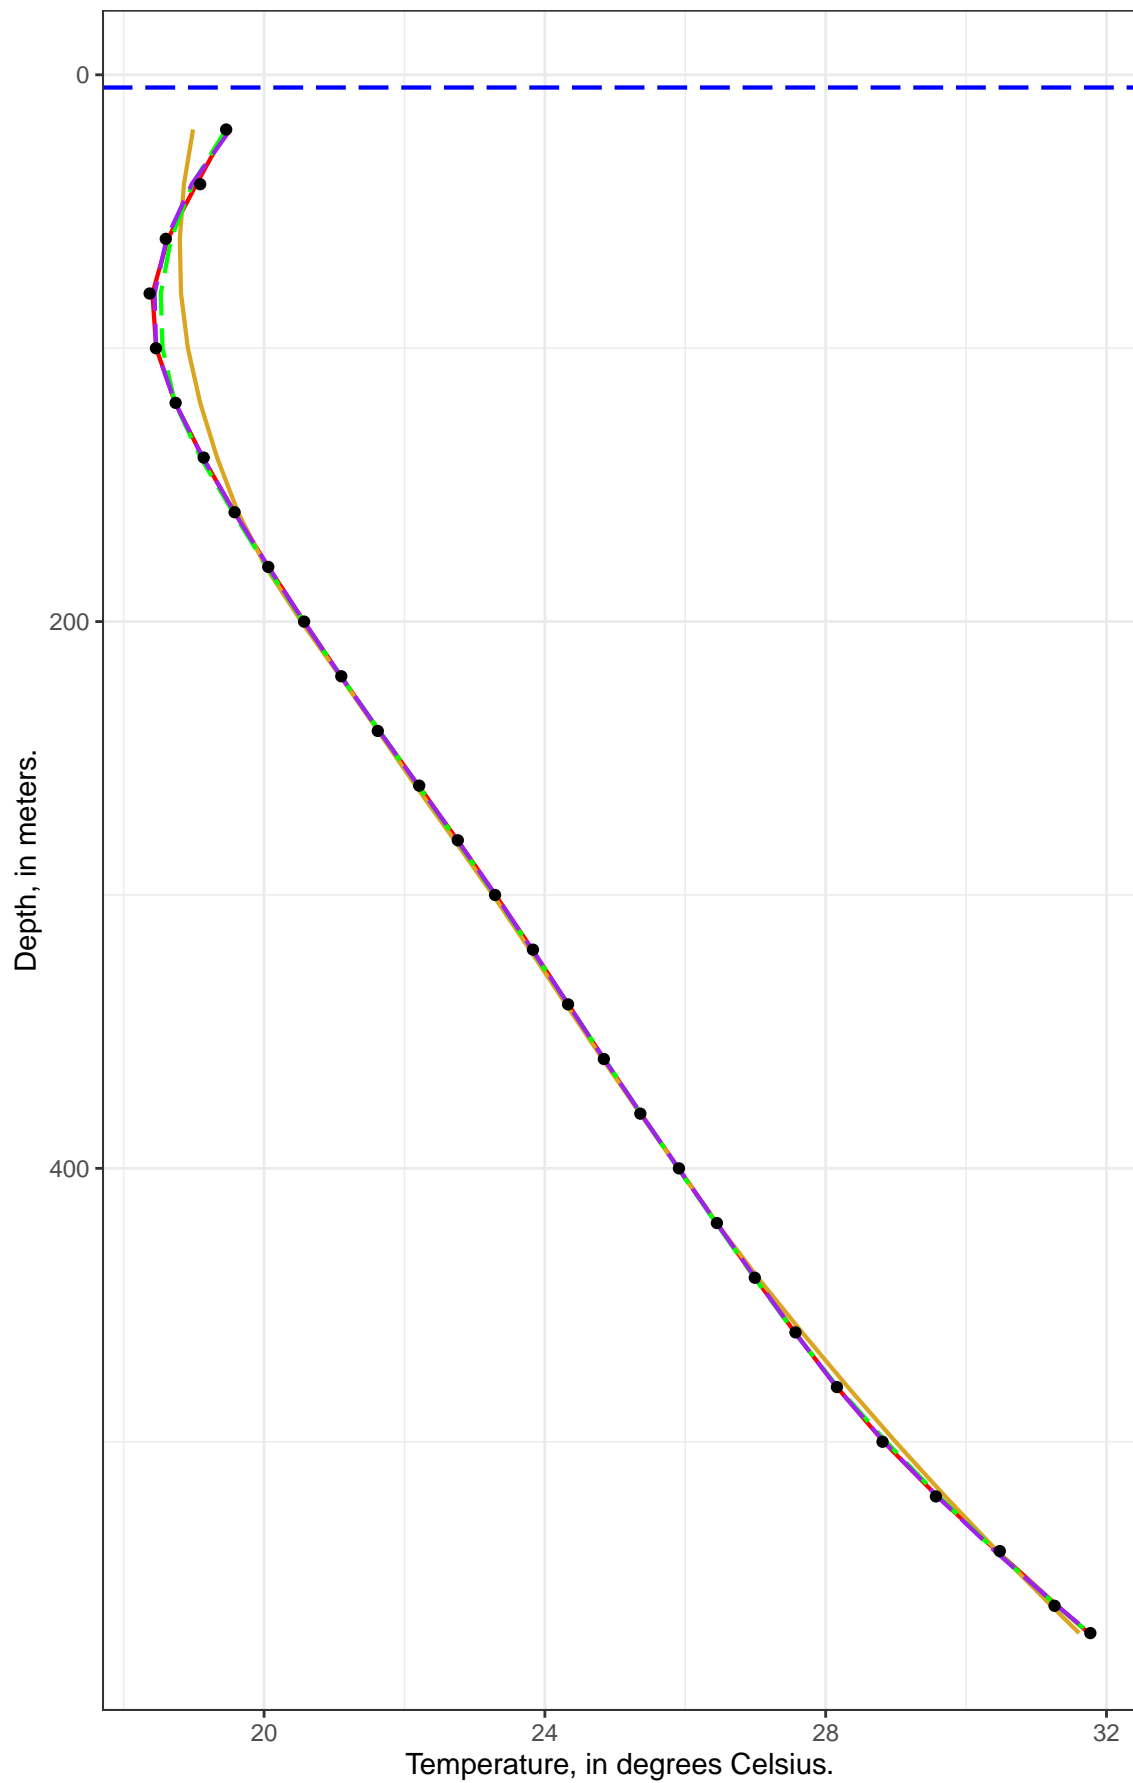

• Data — LOESS (AICC) — LOESS (constant) — LOESS (GCV) — Spline

ID: 191 [LEP\_Well] First Derivative

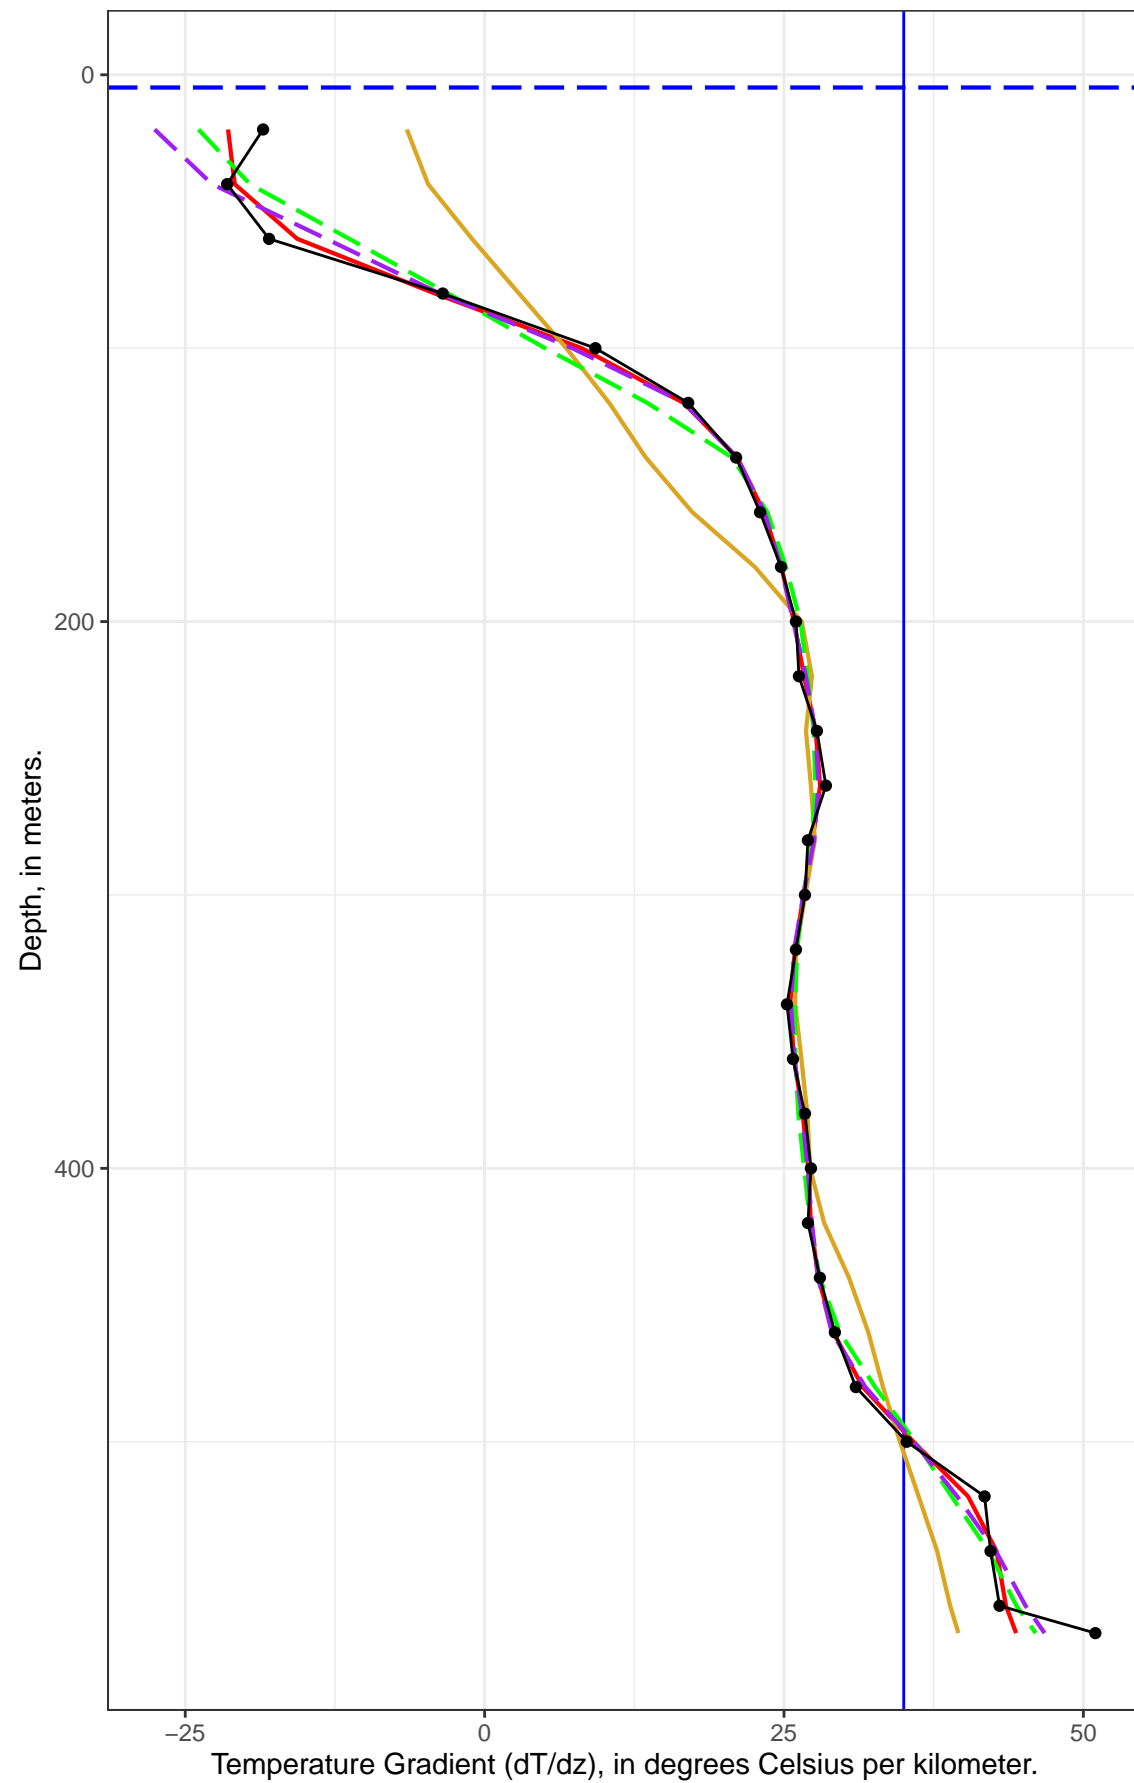

• Data — LOESS (AICC) — LOESS (constant) — LOESS (GCV) — Spline

ID: 191 [LEP\_Well] Second Derivative

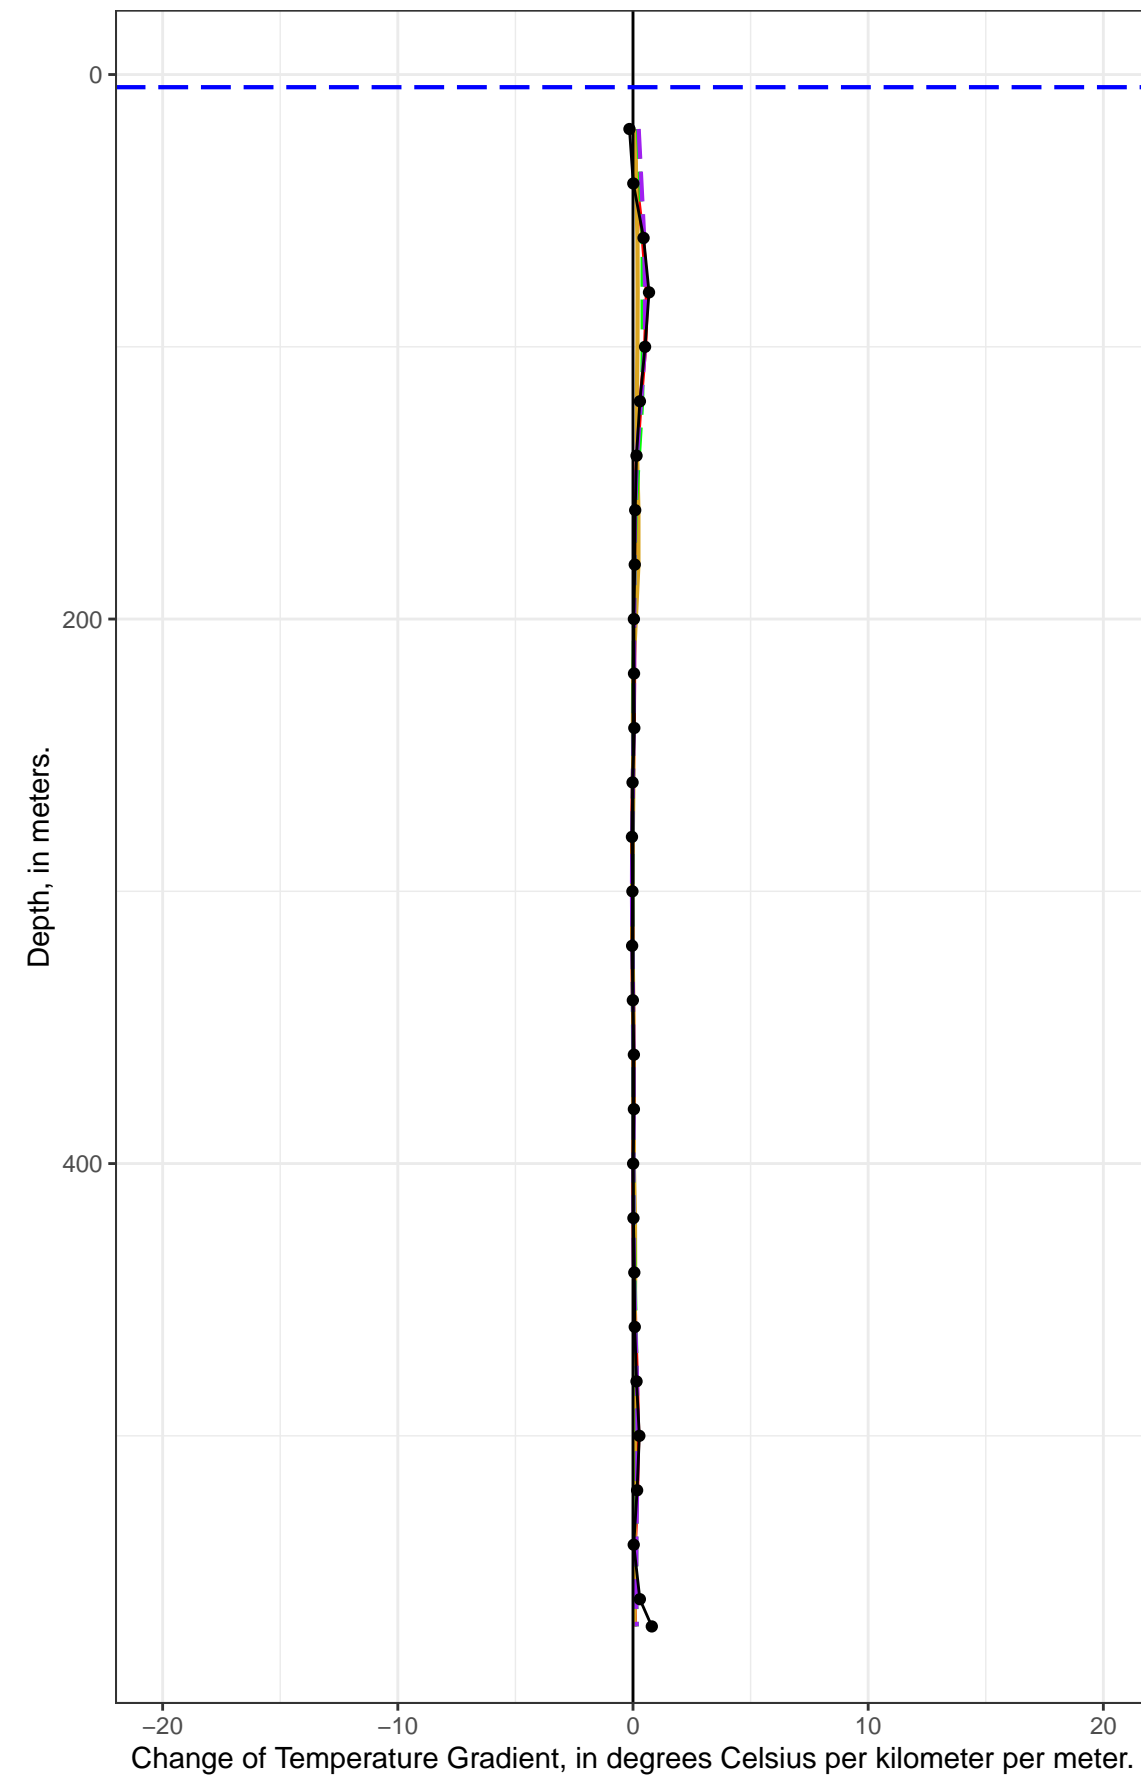

• Data — LOESS (AICC) — LOESS (constant) — LOESS (GCV) — Spline

ID: 192 [LA-1\_S\_Well] Smoothed Profile

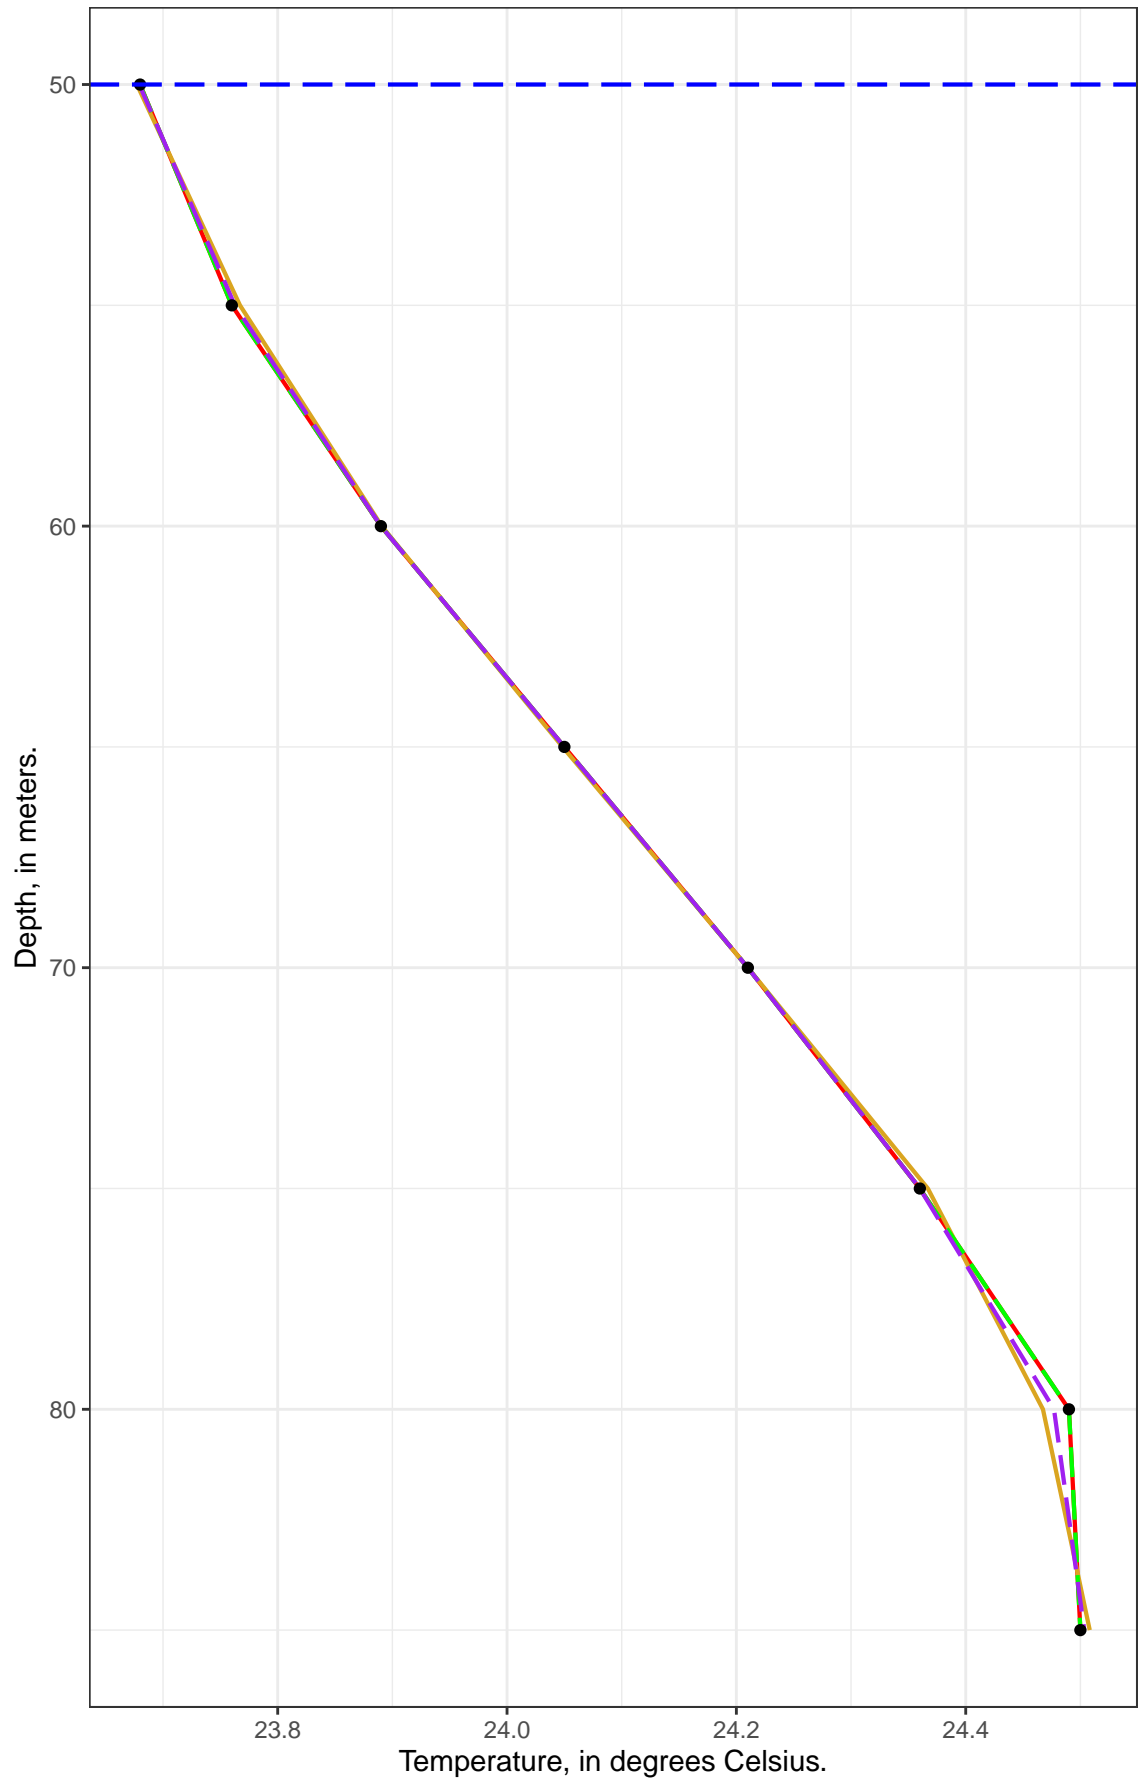

• Data • LOESS (AICC) • LOESS (constant) • LOESS (GCV) • Spline

ID: 192 [LA-1\_S\_Well] First Derivative

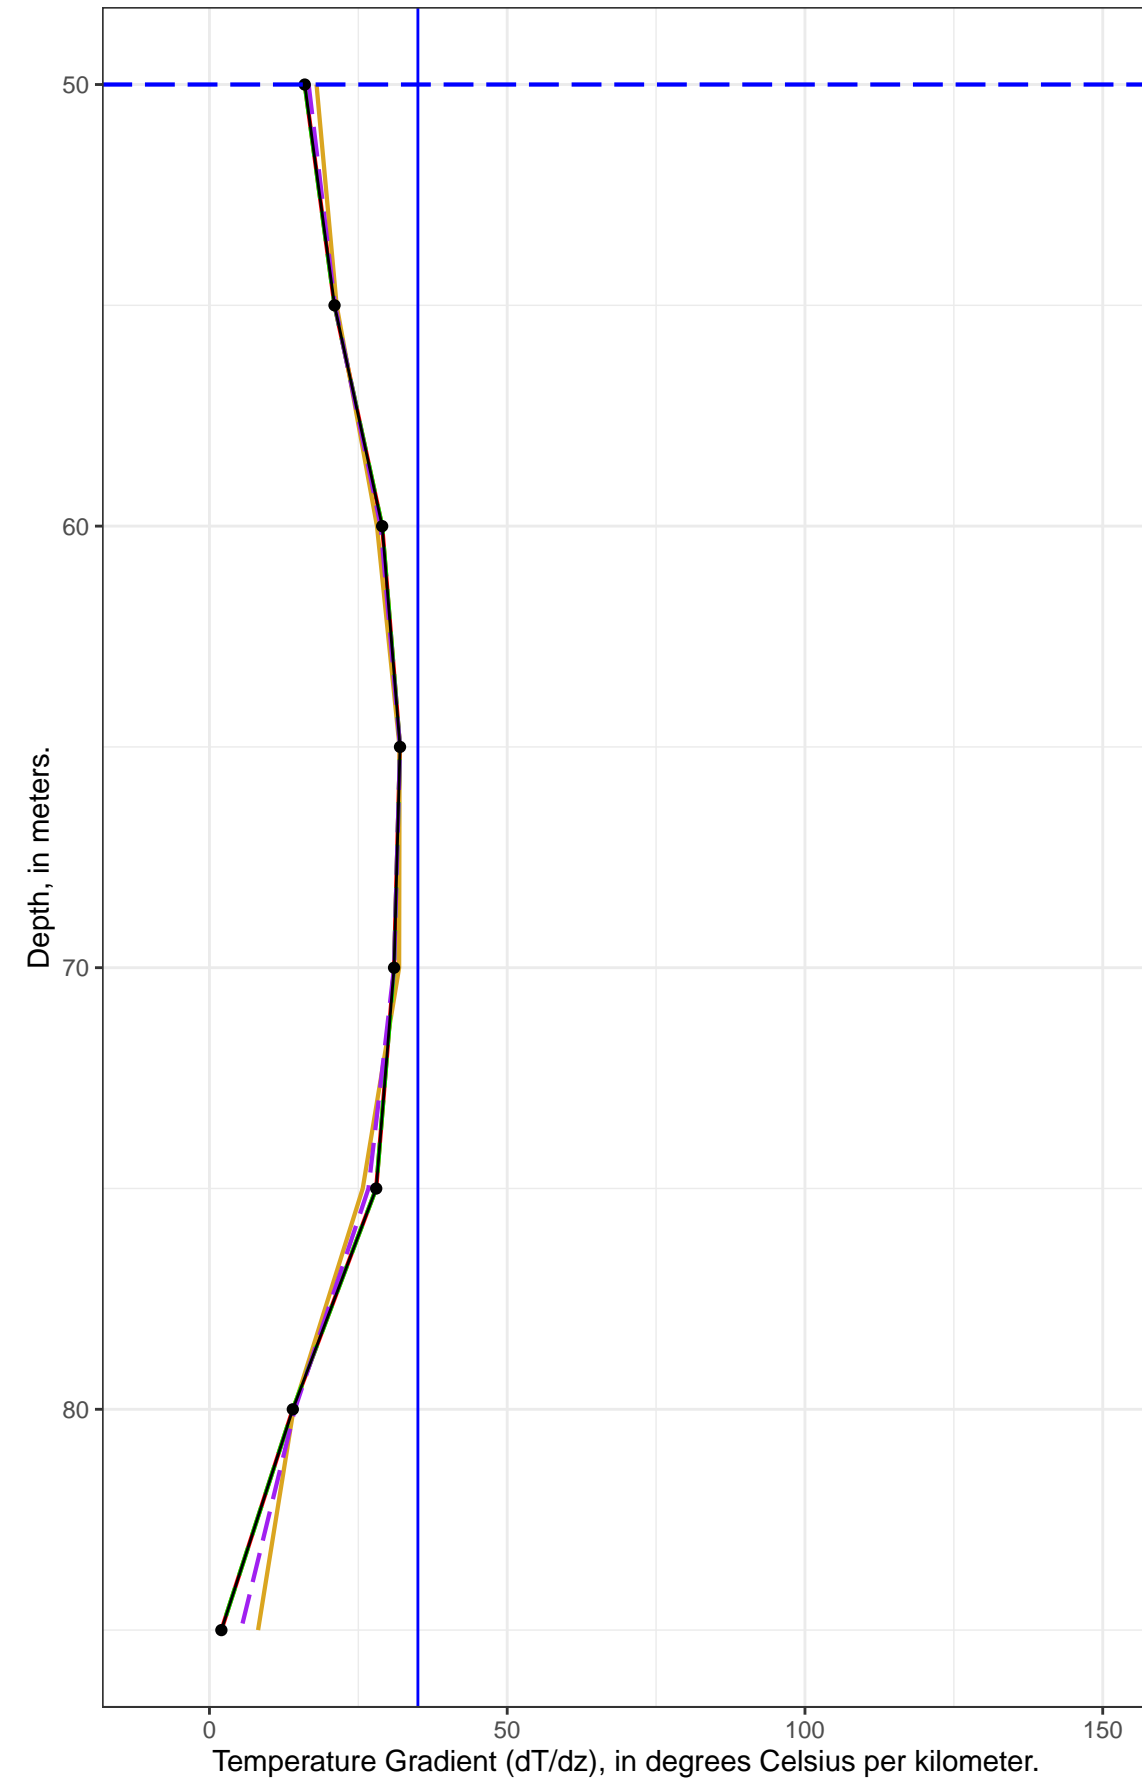

• Data • LOESS (AICC) • LOESS (constant) • LOESS (GCV) • Spline

ID: 192 [LA-1\_S\_Well] Second Derivative

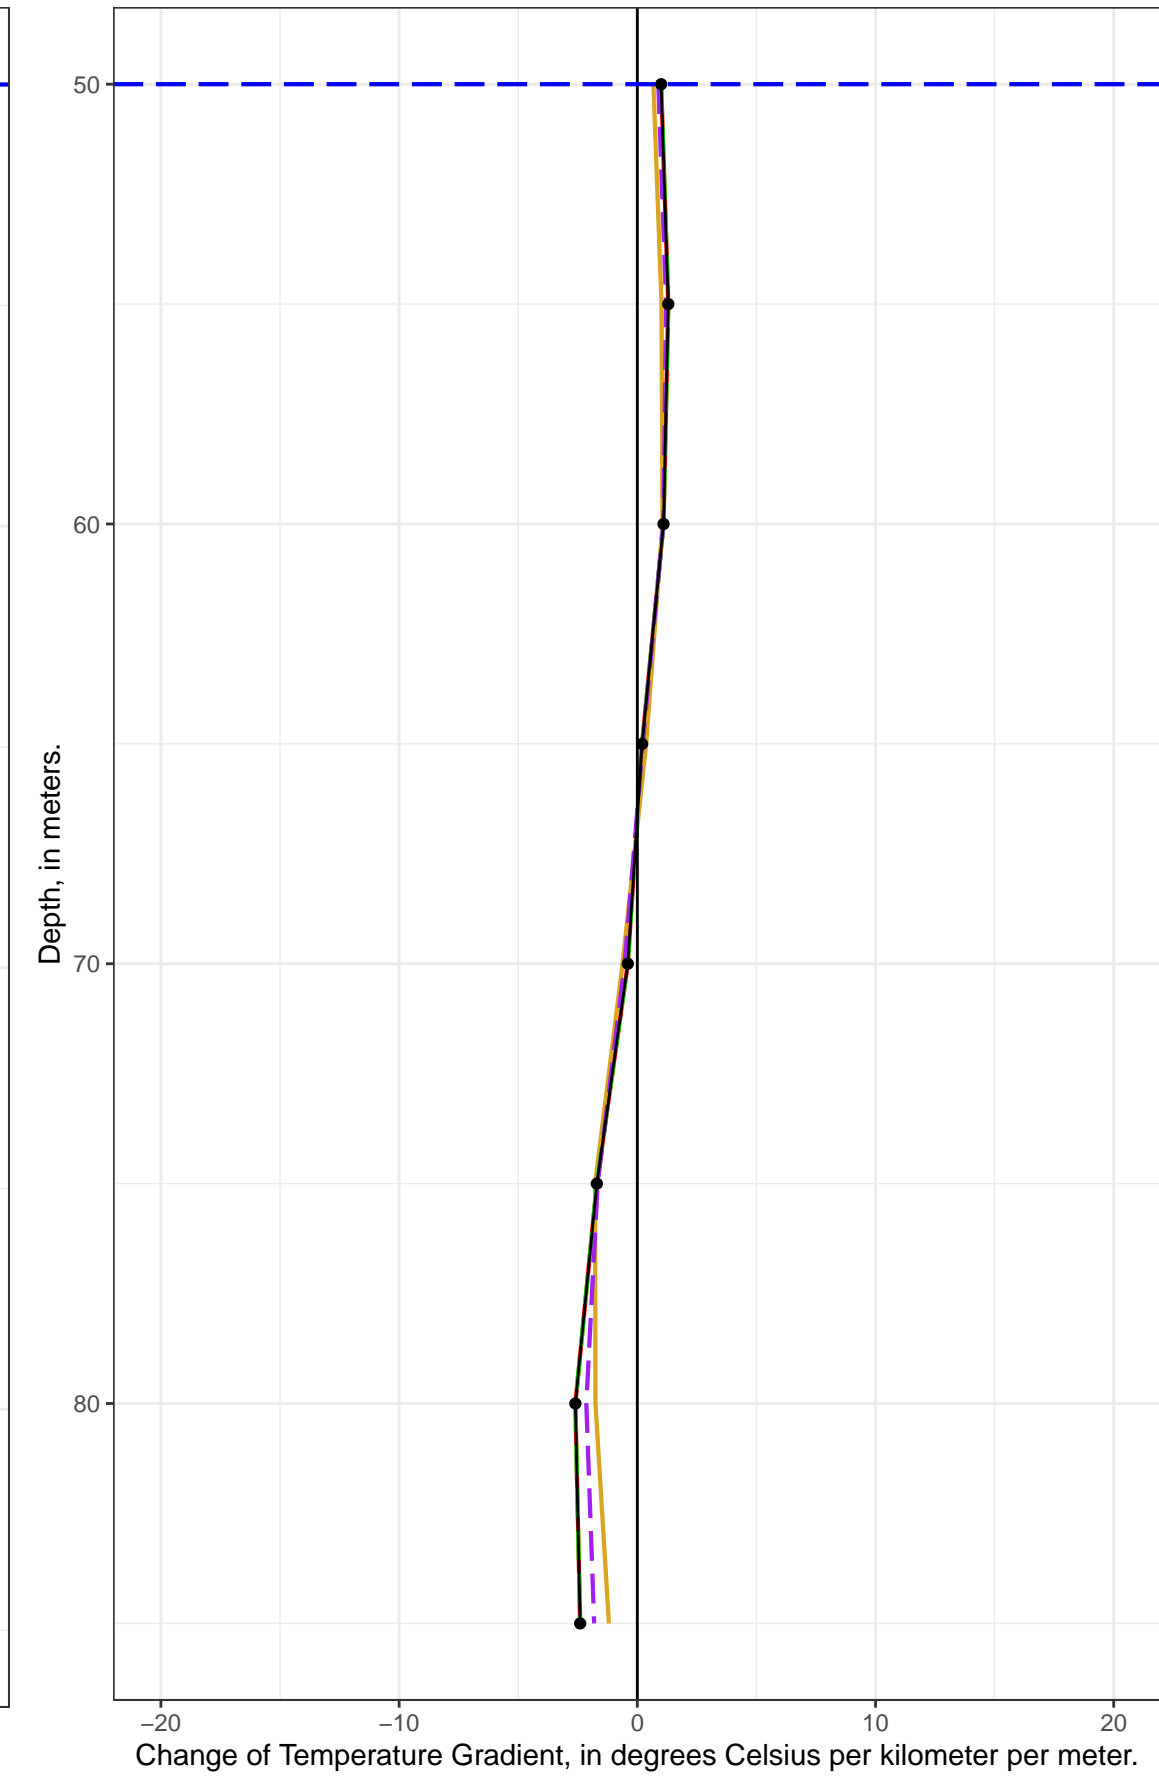

• Data • LOESS (AICC) • LOESS (constant) • LOESS (GCV) • Spline

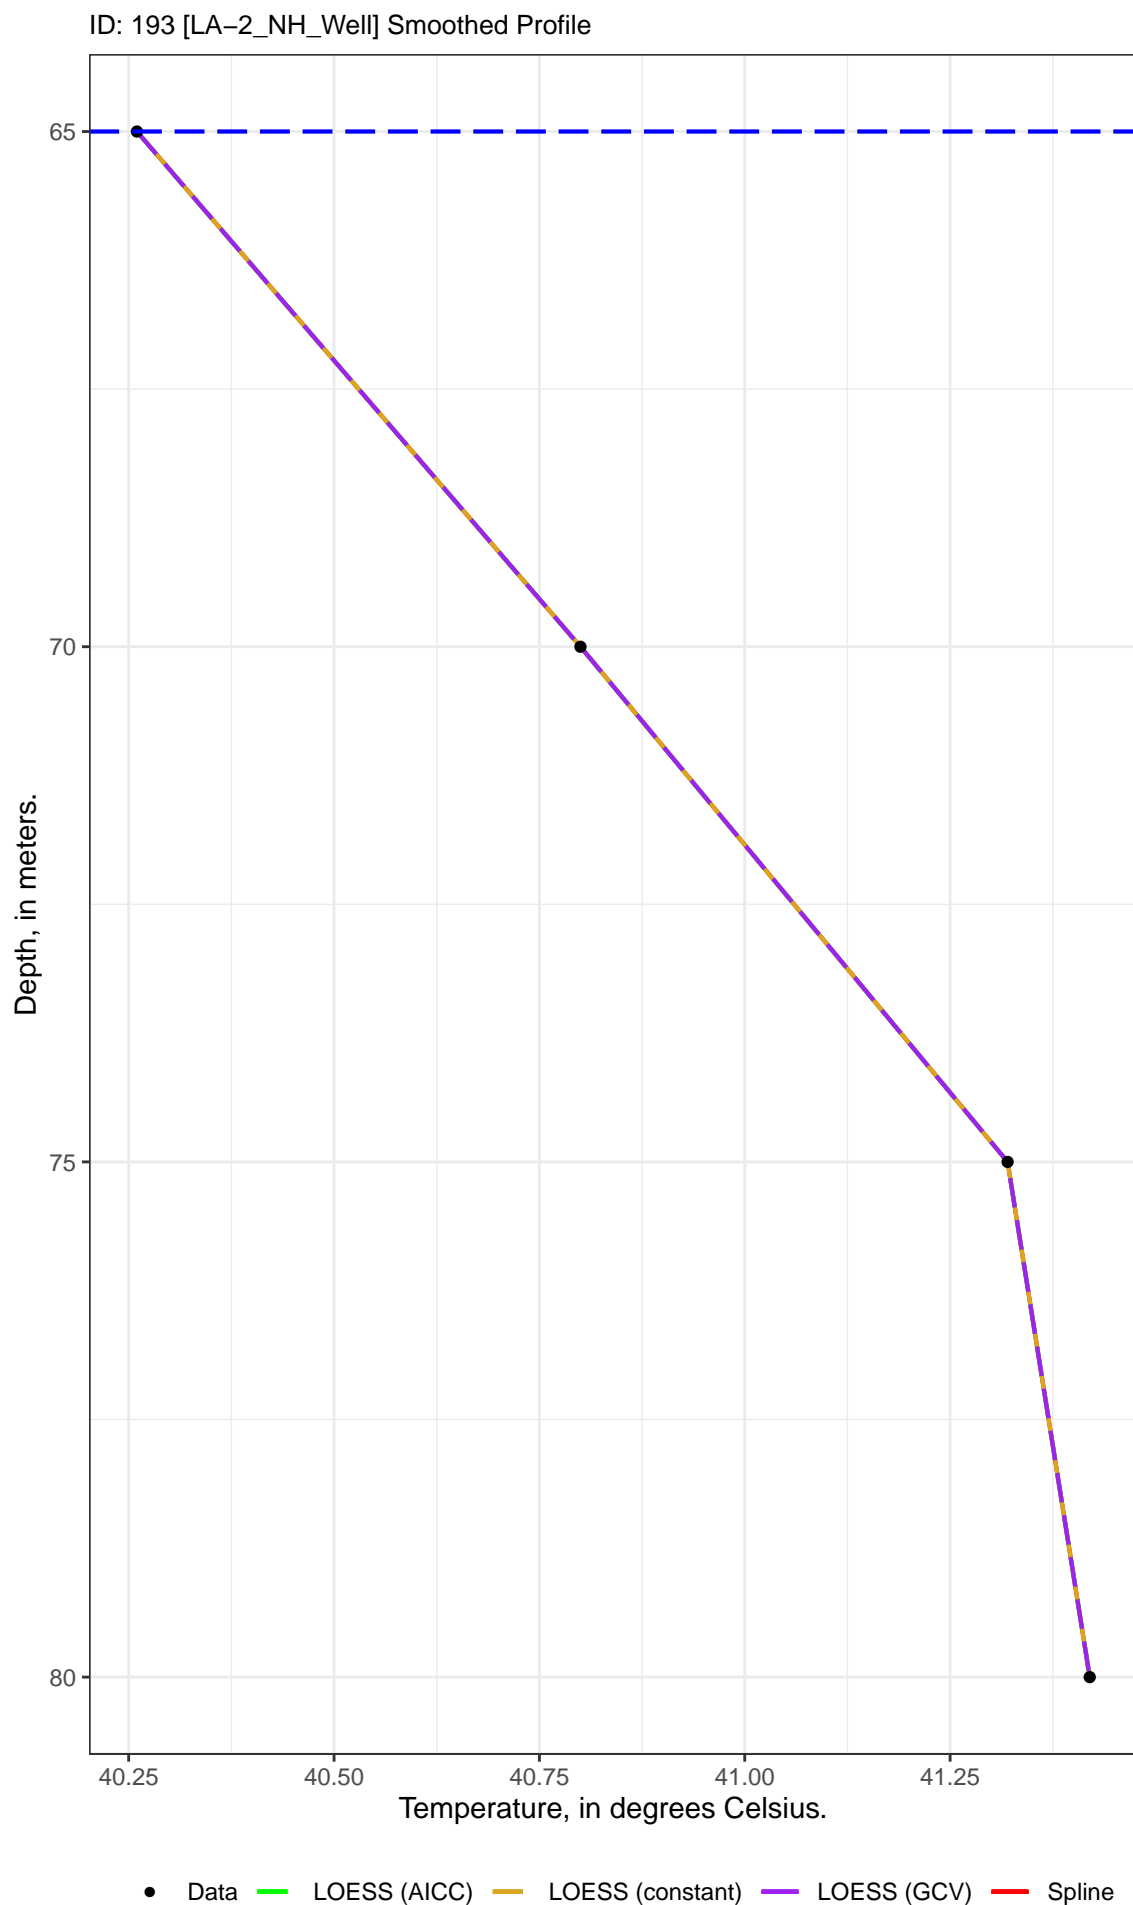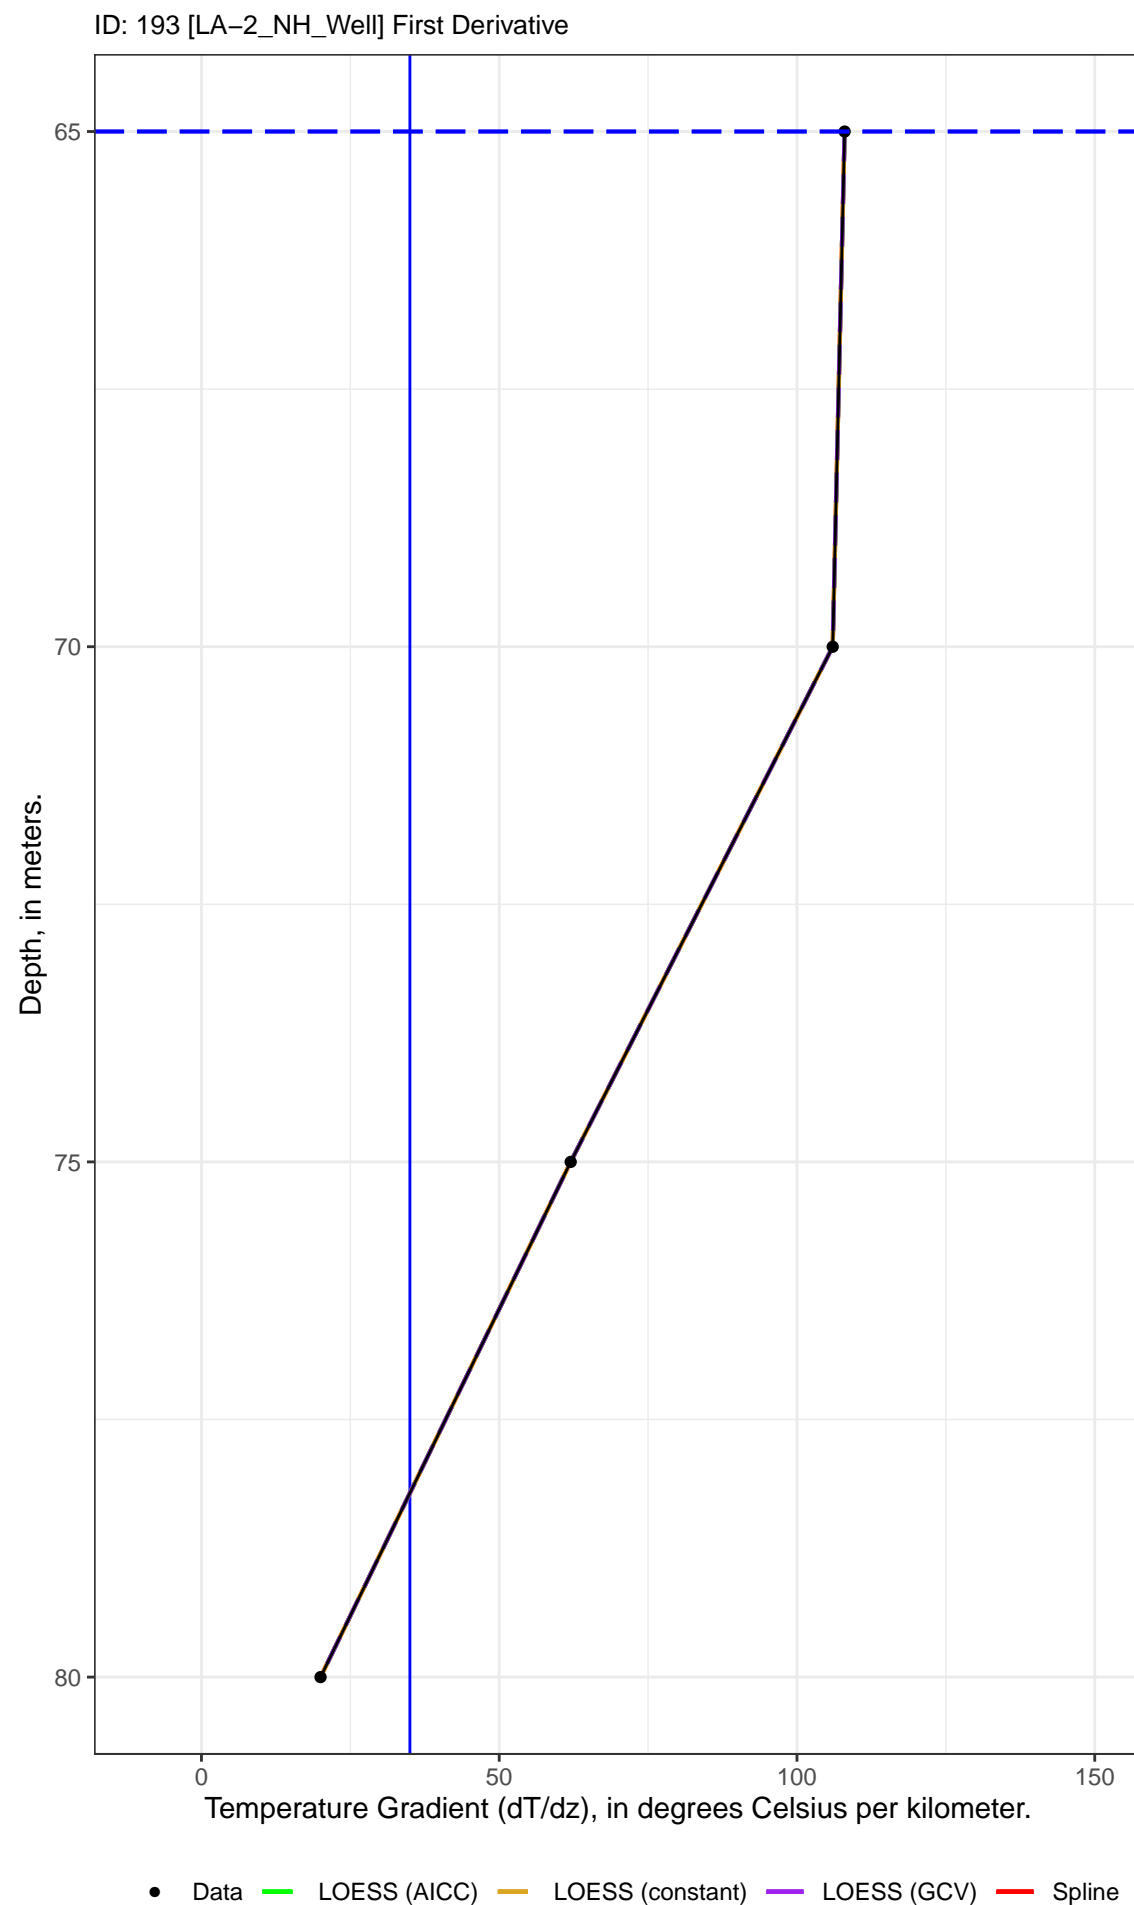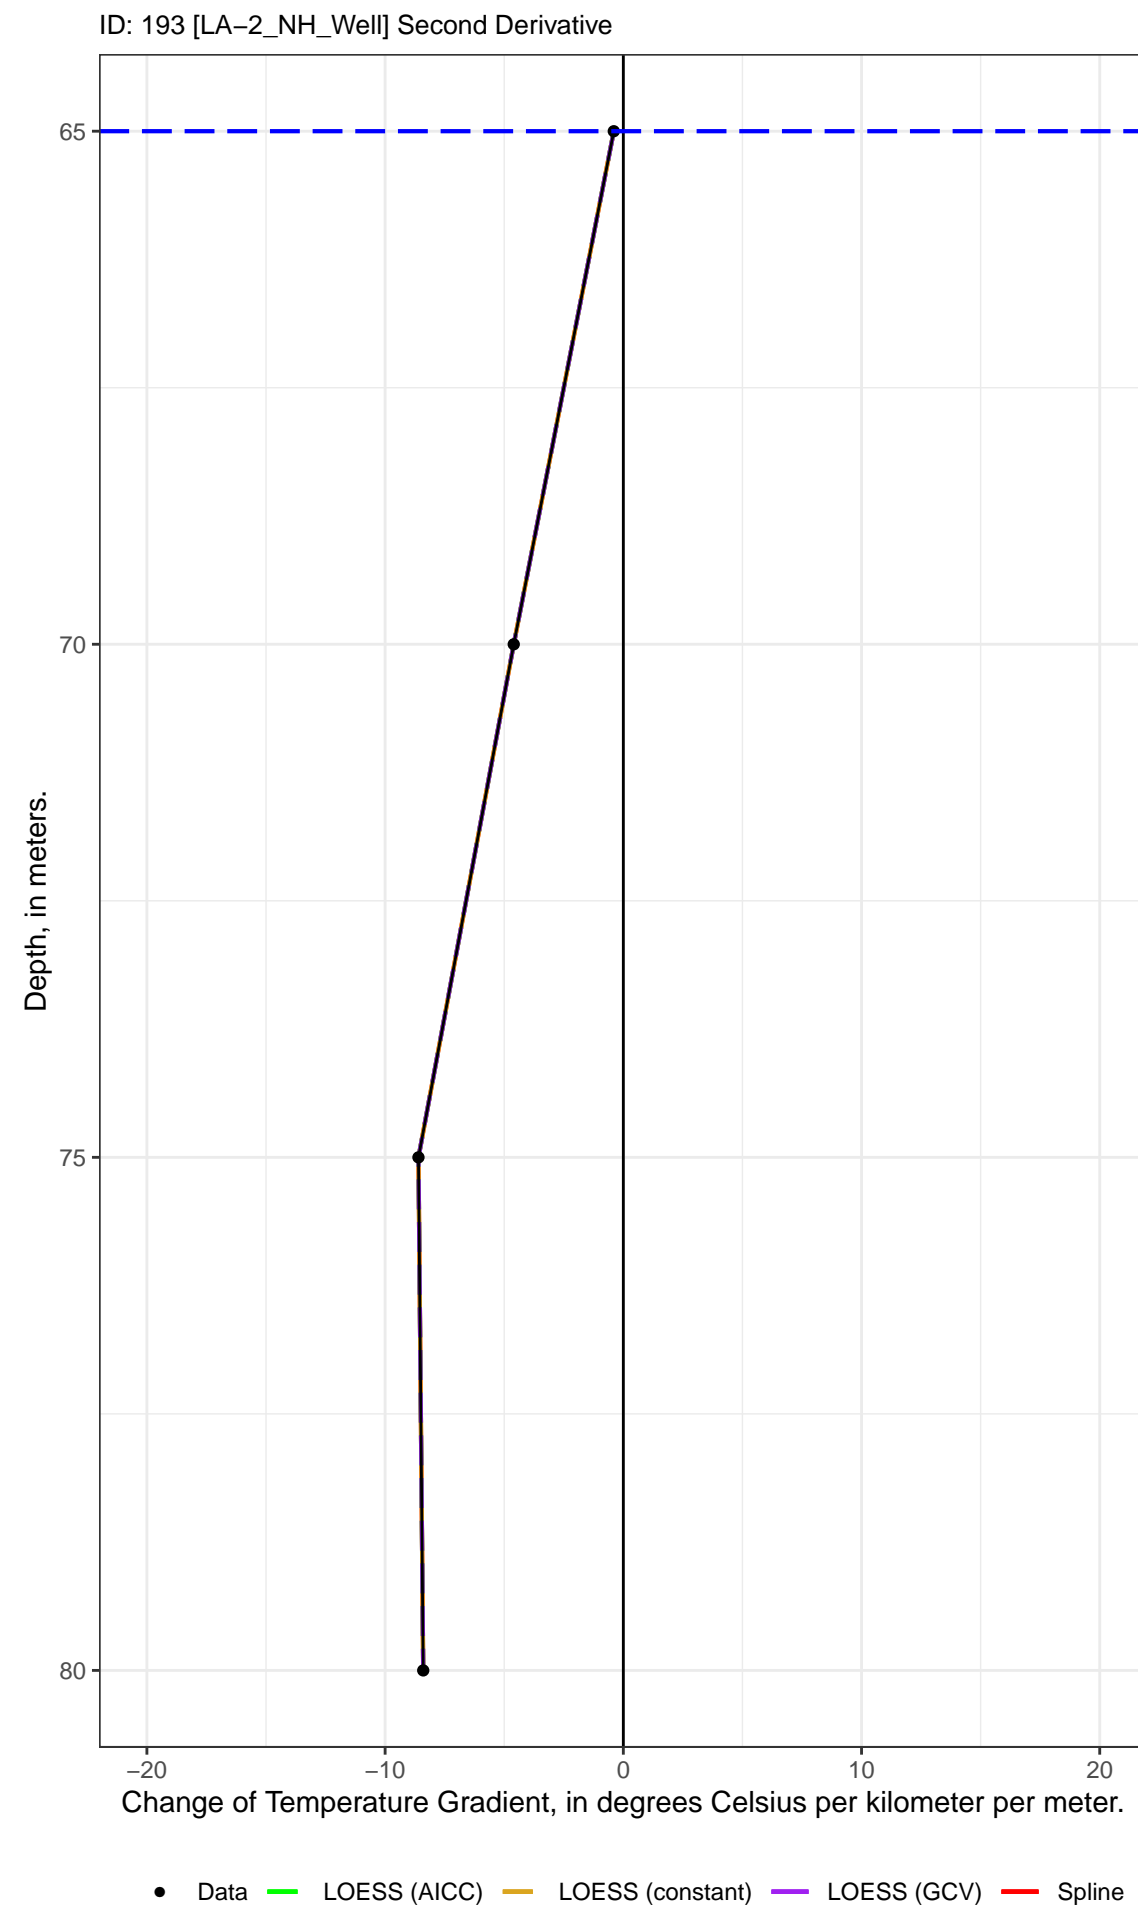

ID: 194 [LA-3\_HK\_Well] Smoothed Profile

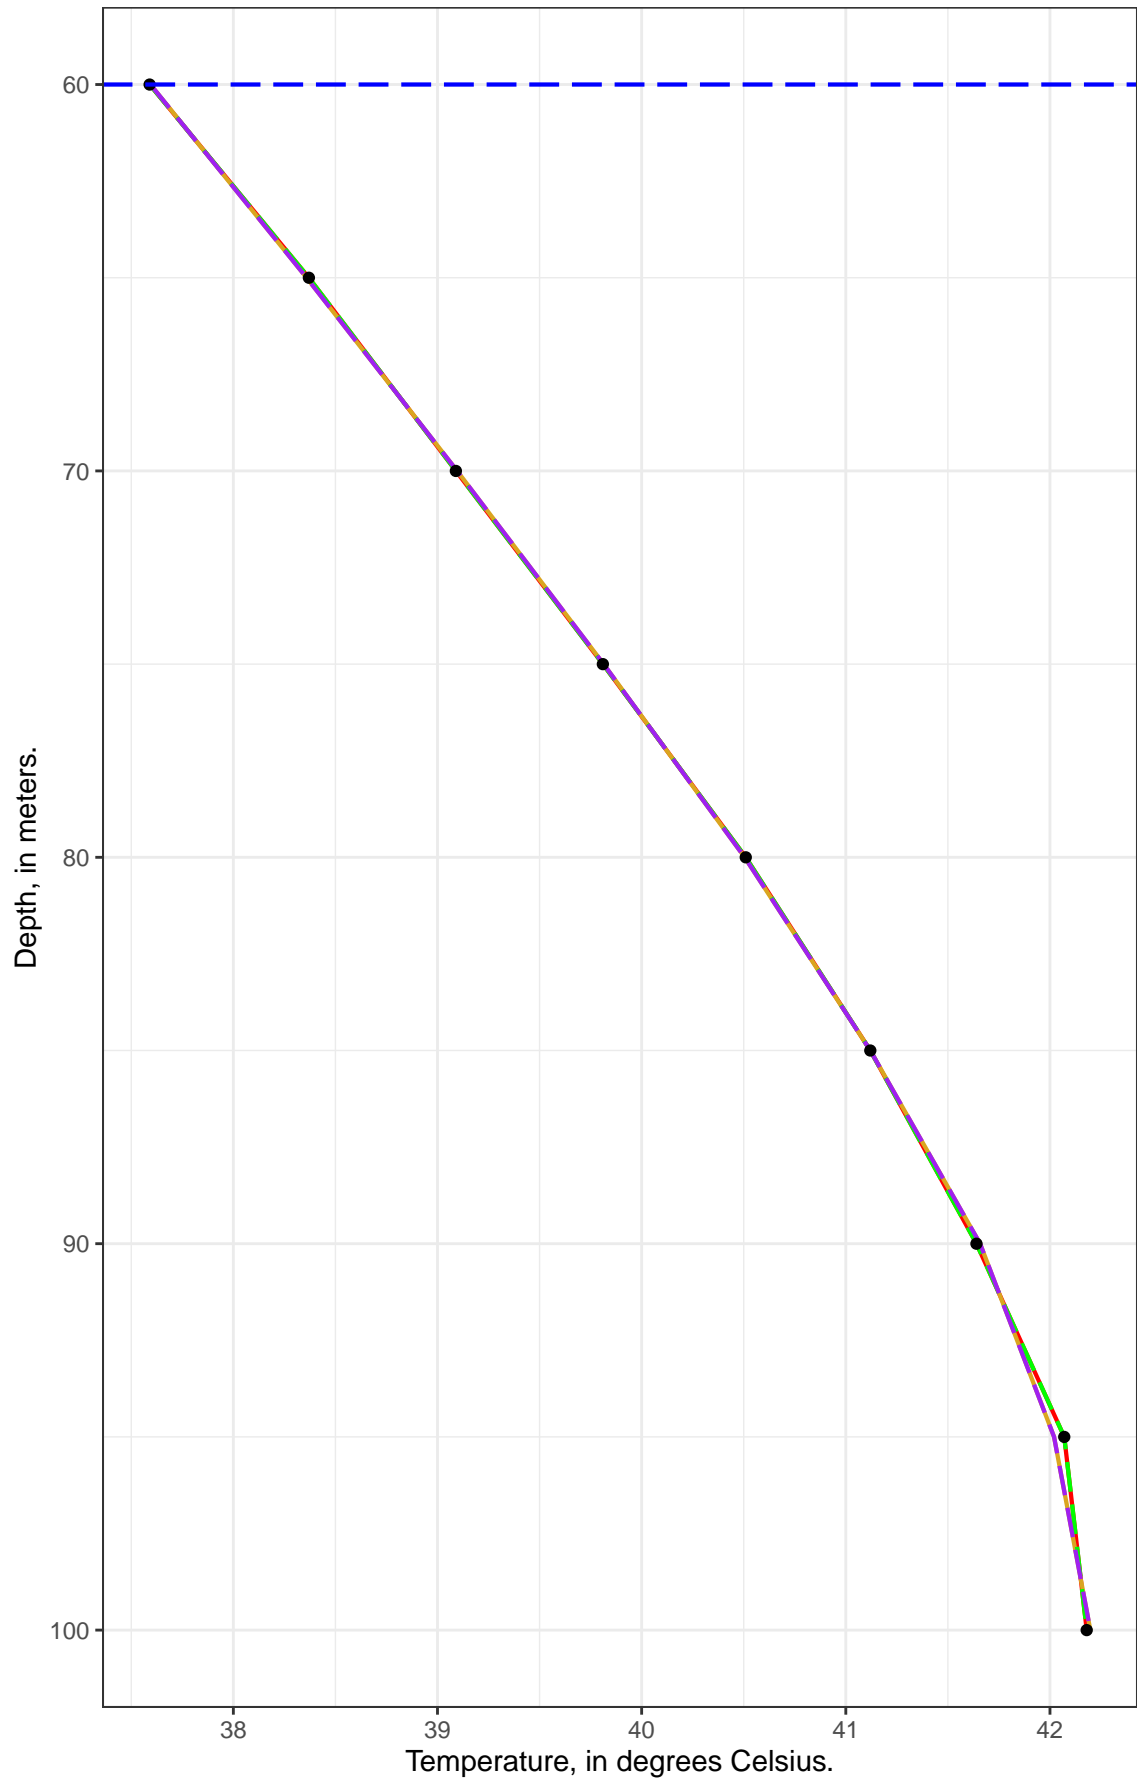

ID: 194 [LA-3\_HK\_Well] First Derivative

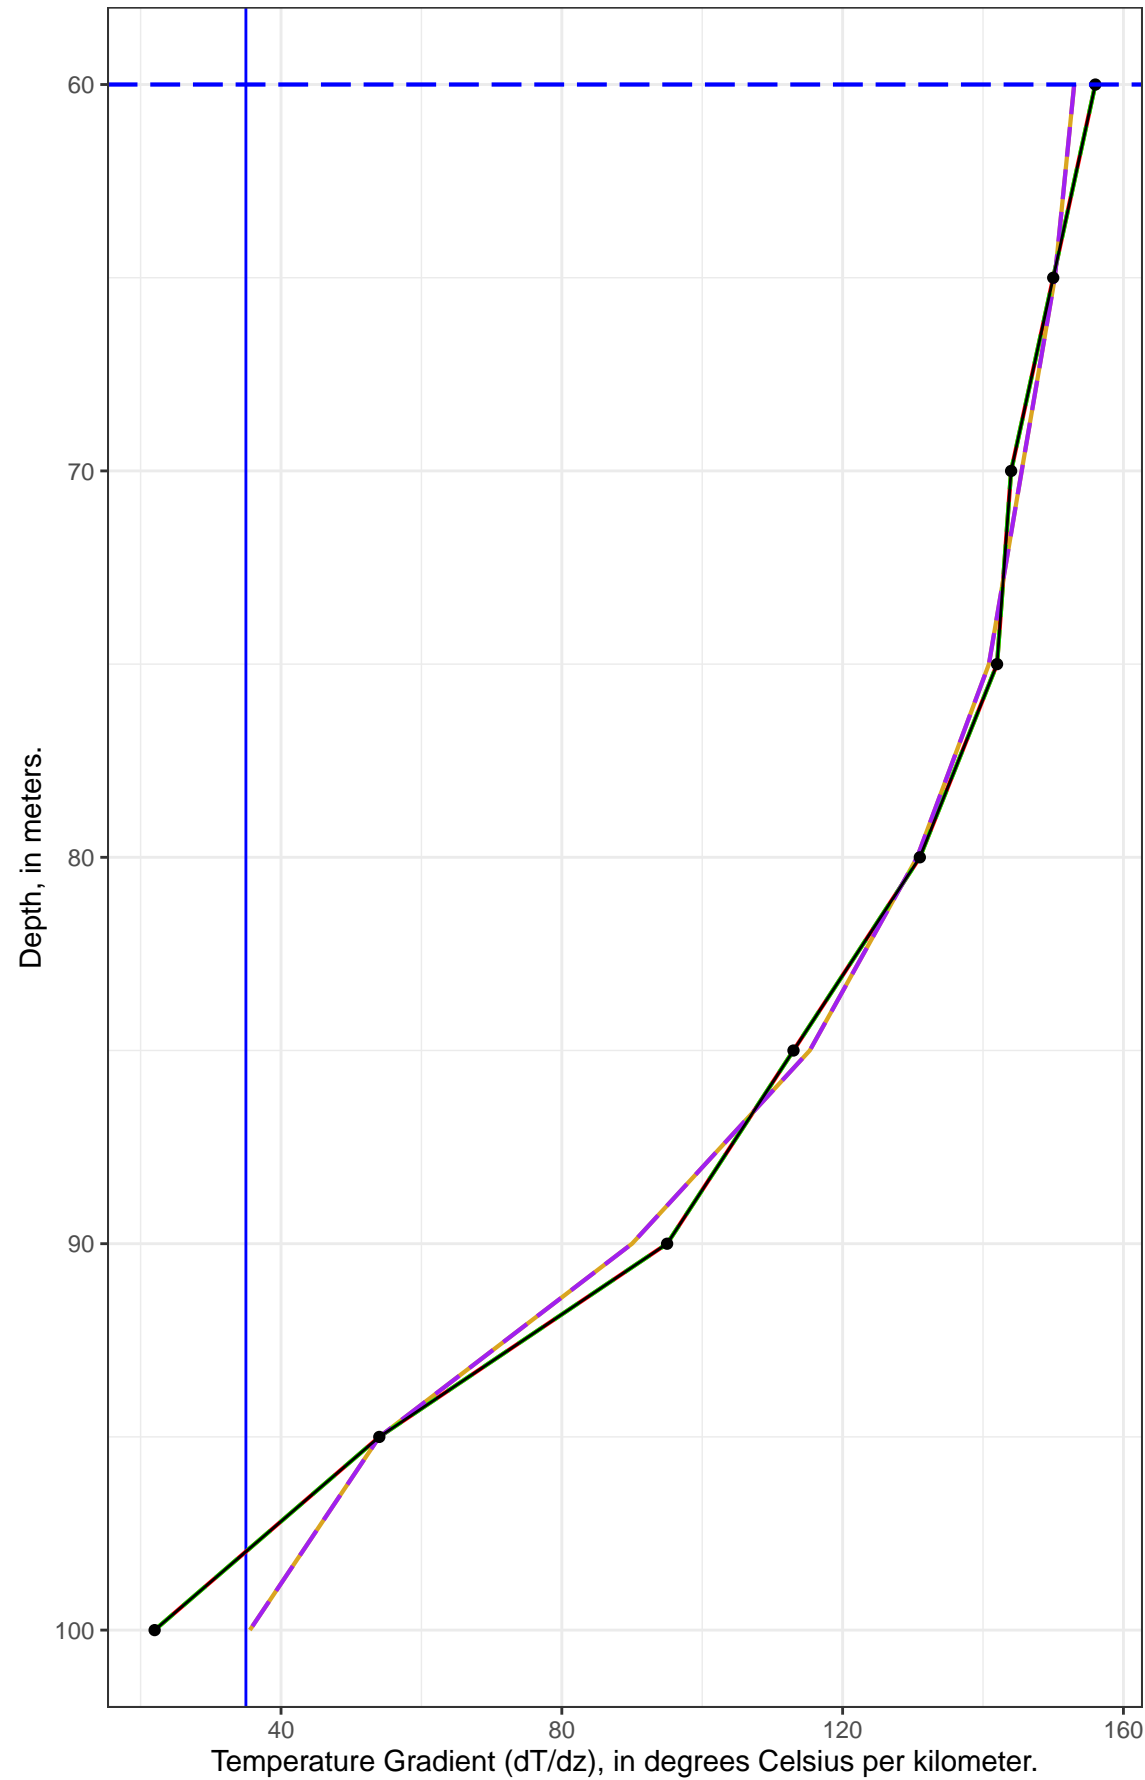

ID: 194 [LA-3\_HK\_Well] Second Derivative

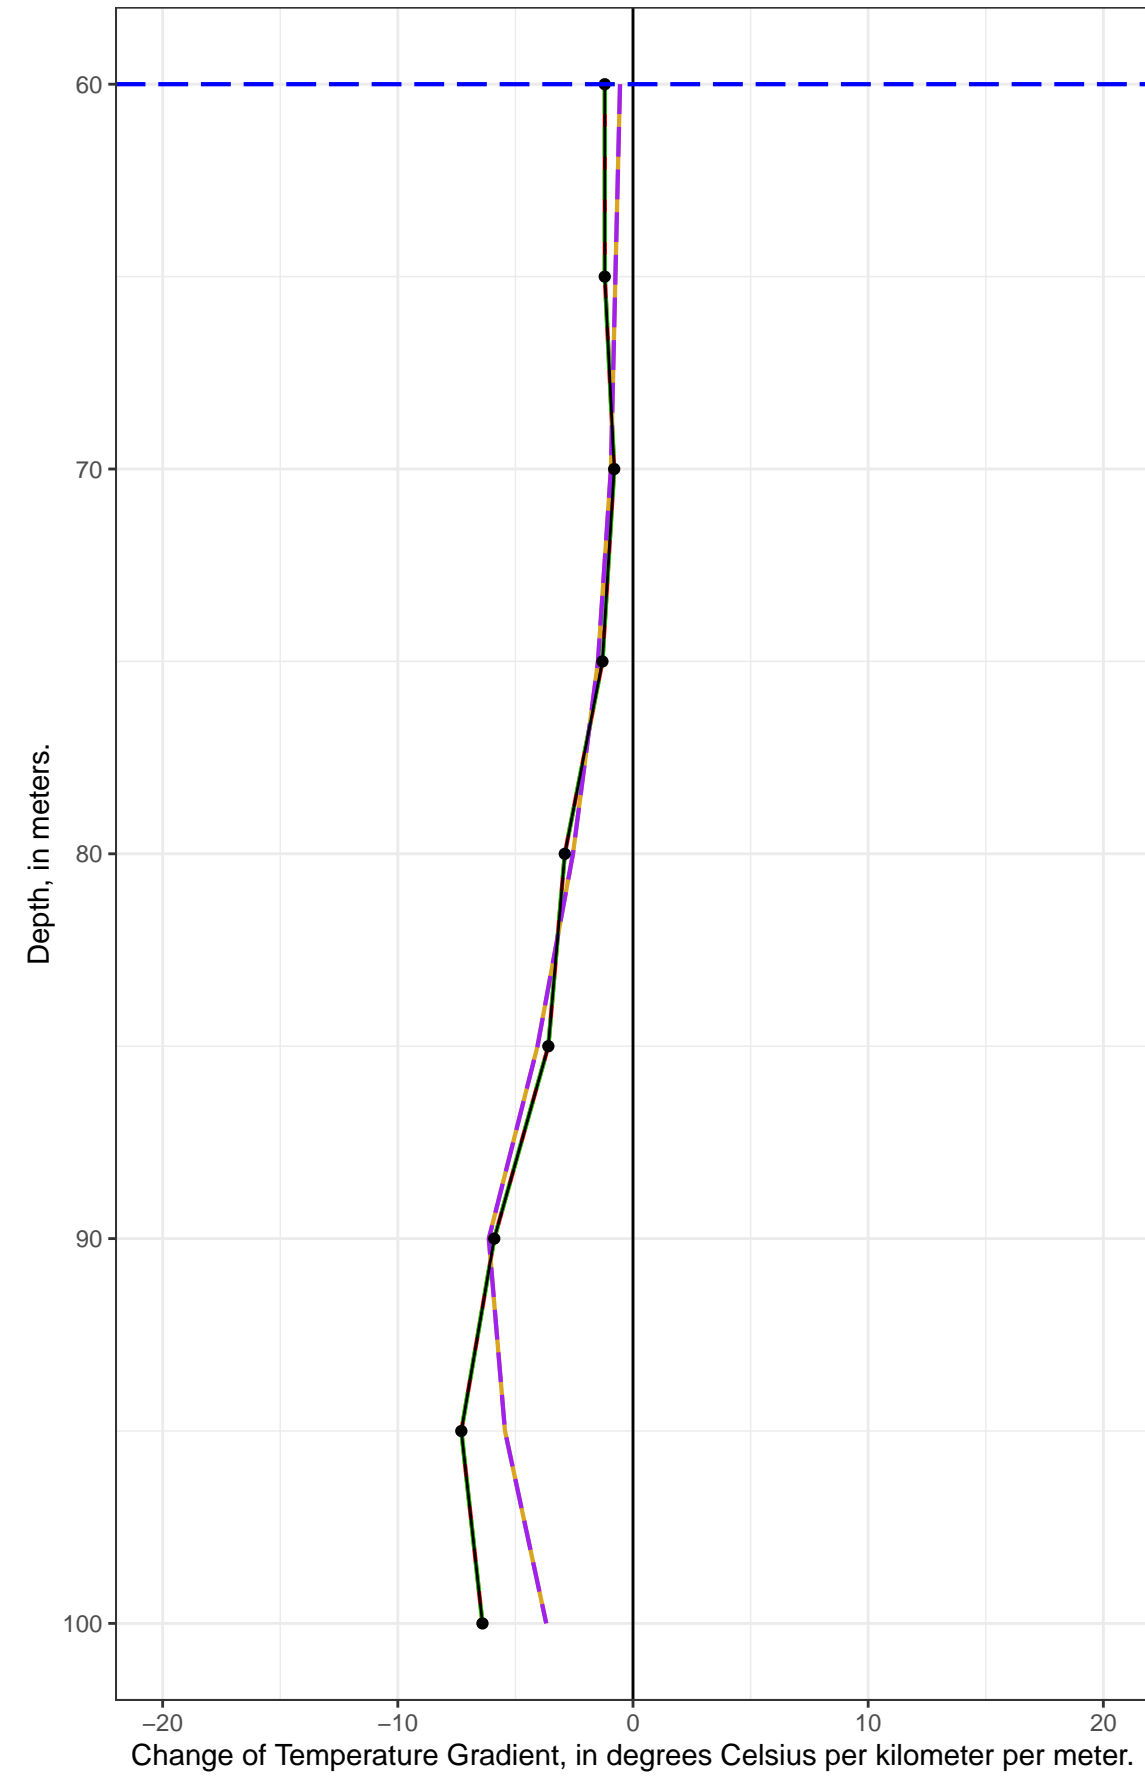

• Data • LOESS (AICC) • LOESS (constant) • LOESS (GCV) • Spline

• Data • LOESS (AICC) • LOESS (constant) • LOESS (GCV) • Spline

• Data • LOESS (AICC) • LOESS (constant) • LOESS (GCV) • Spline

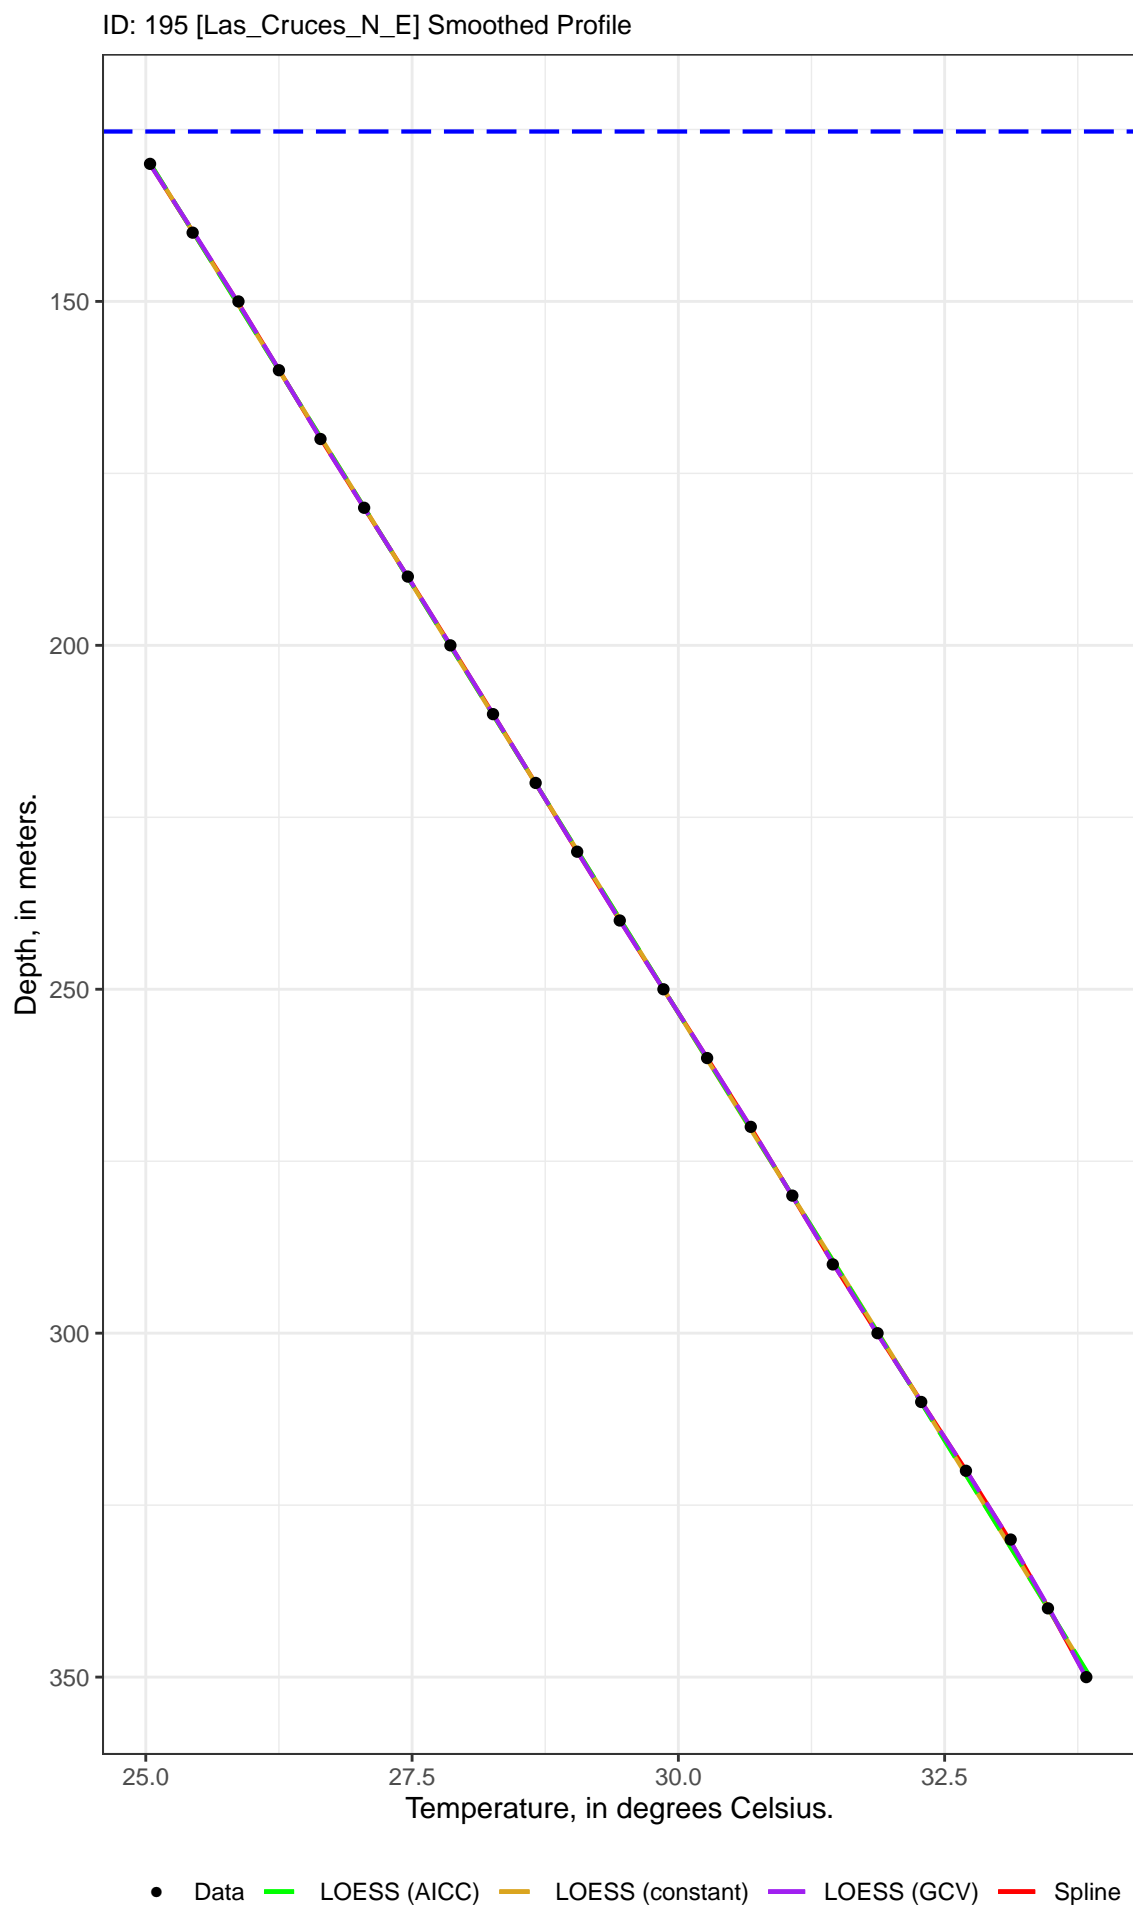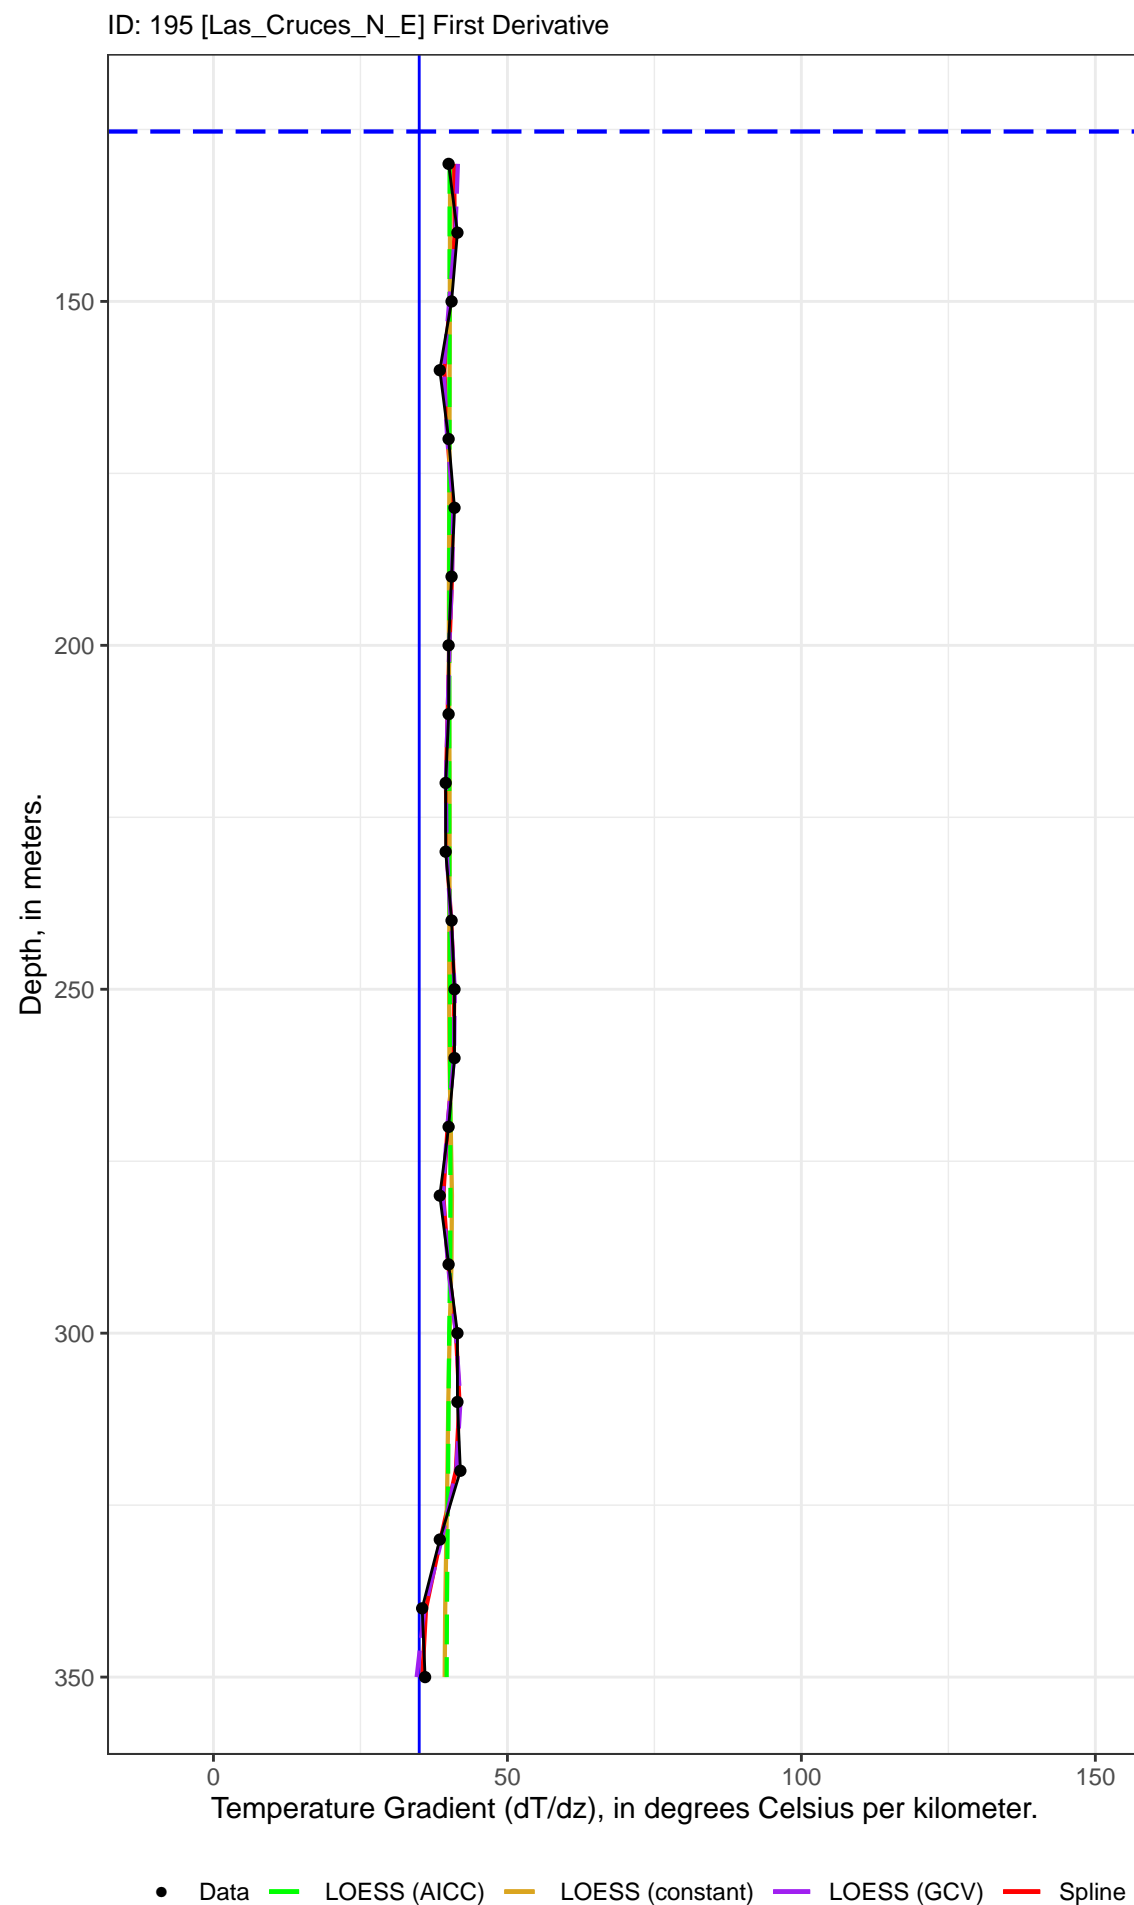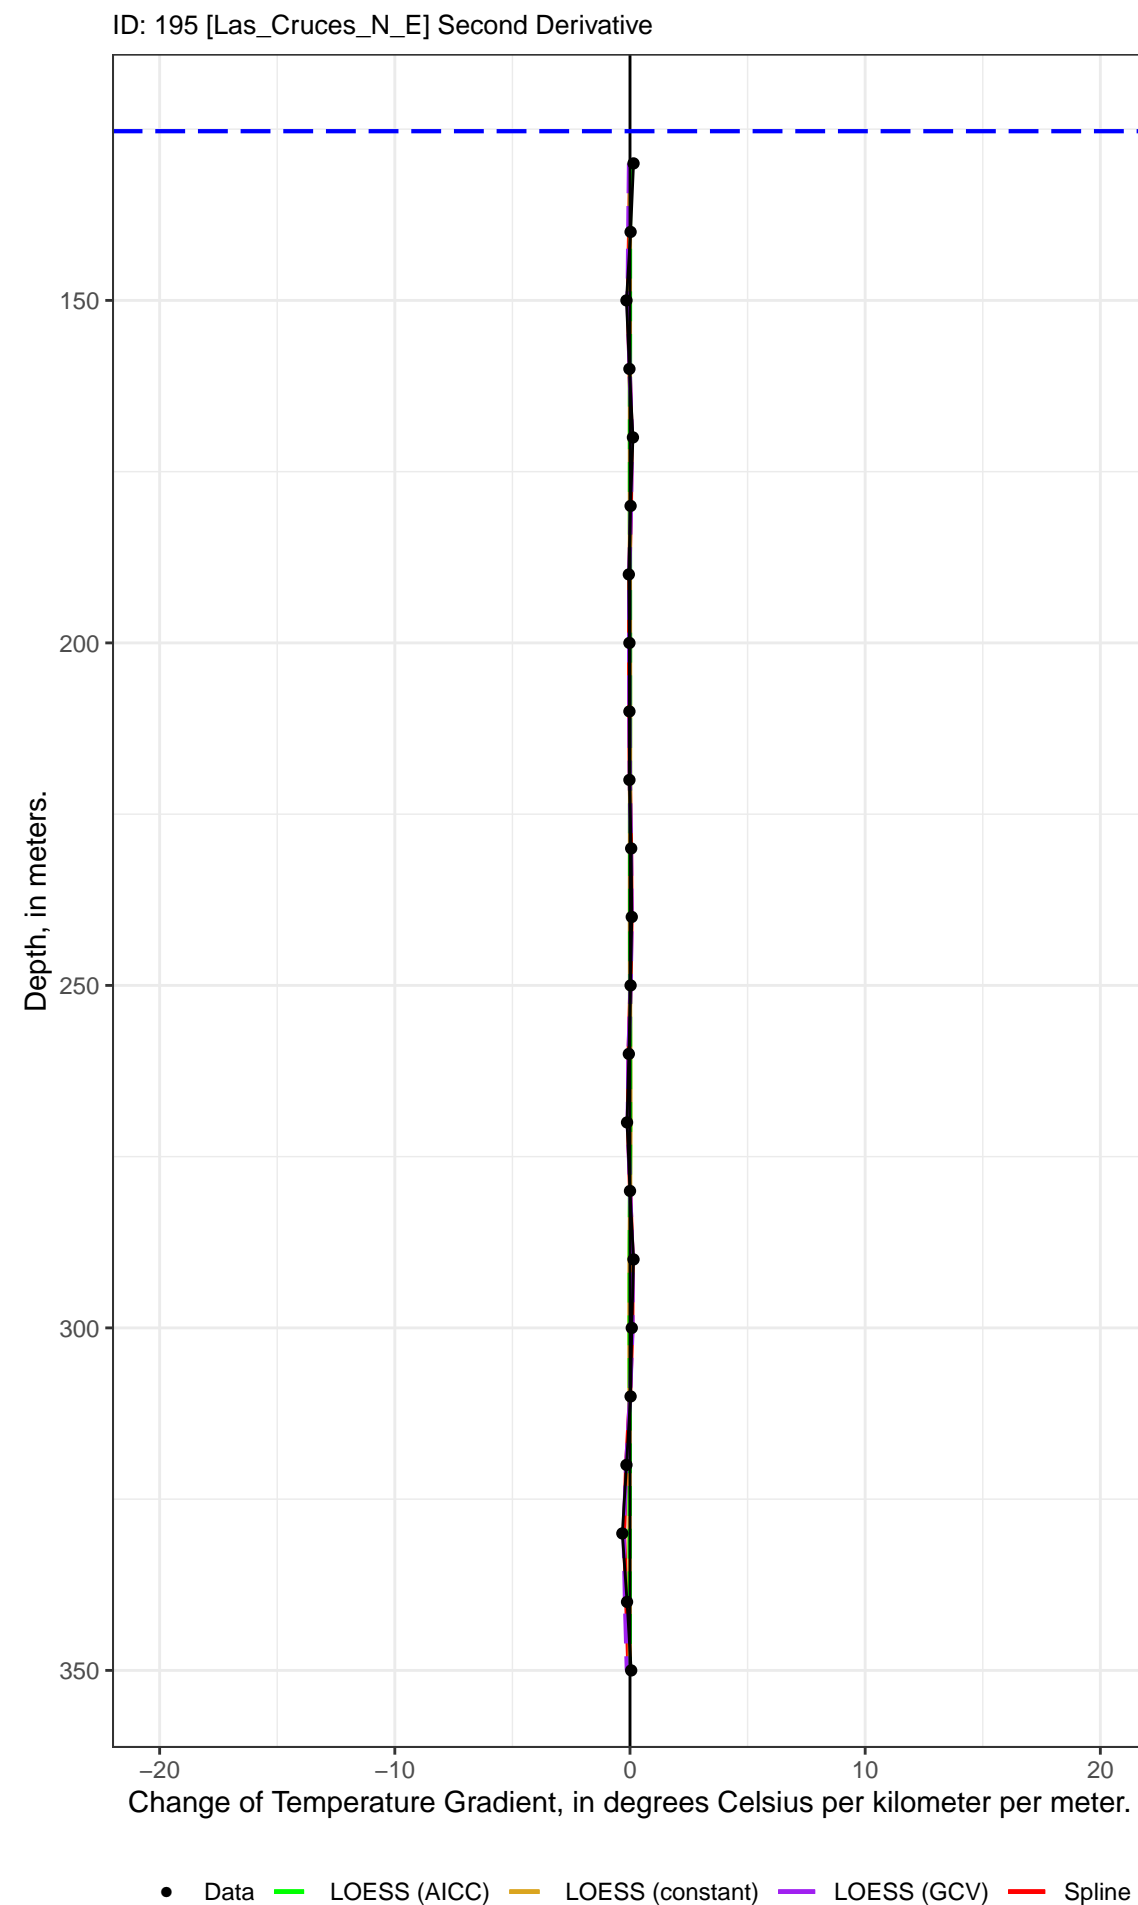

ID: 197 [Las\_Cruces\_S\_W] Smoothed Profile

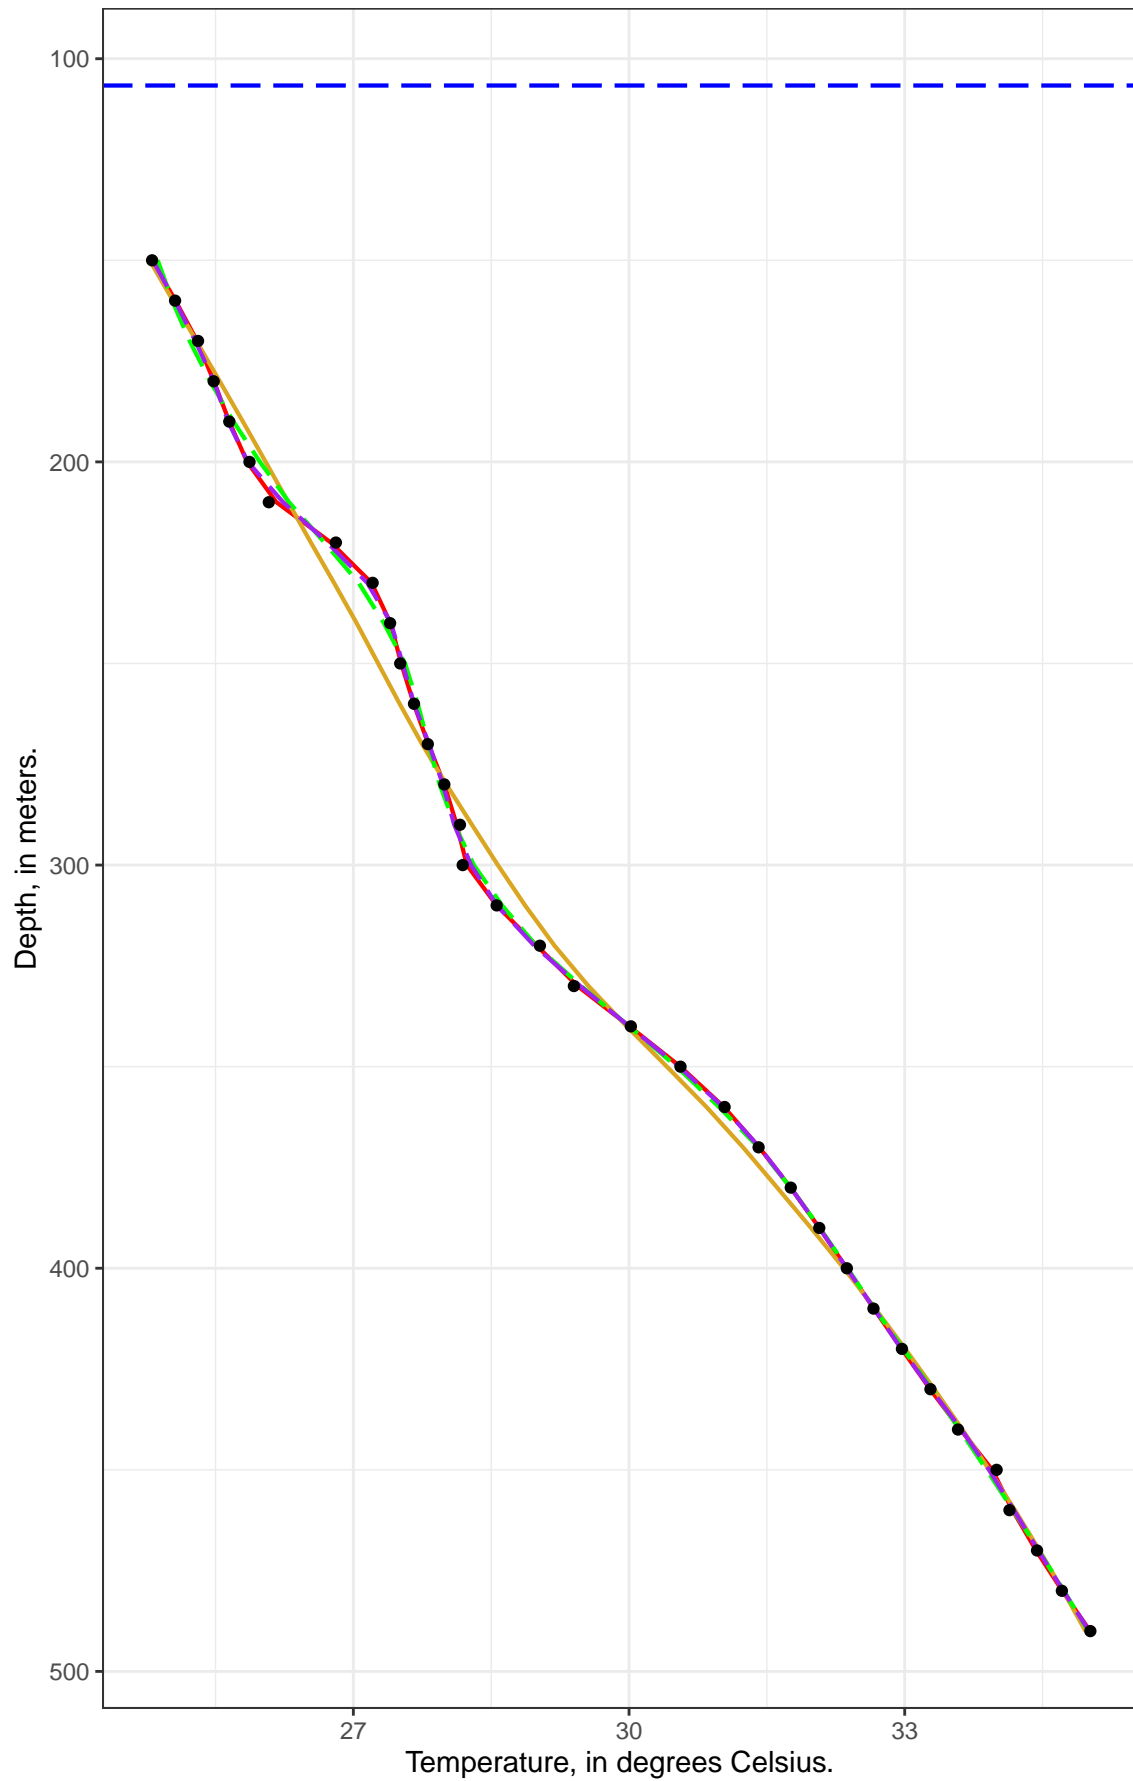

ID: 197 [Las\_Cruces\_S\_W] First Derivative

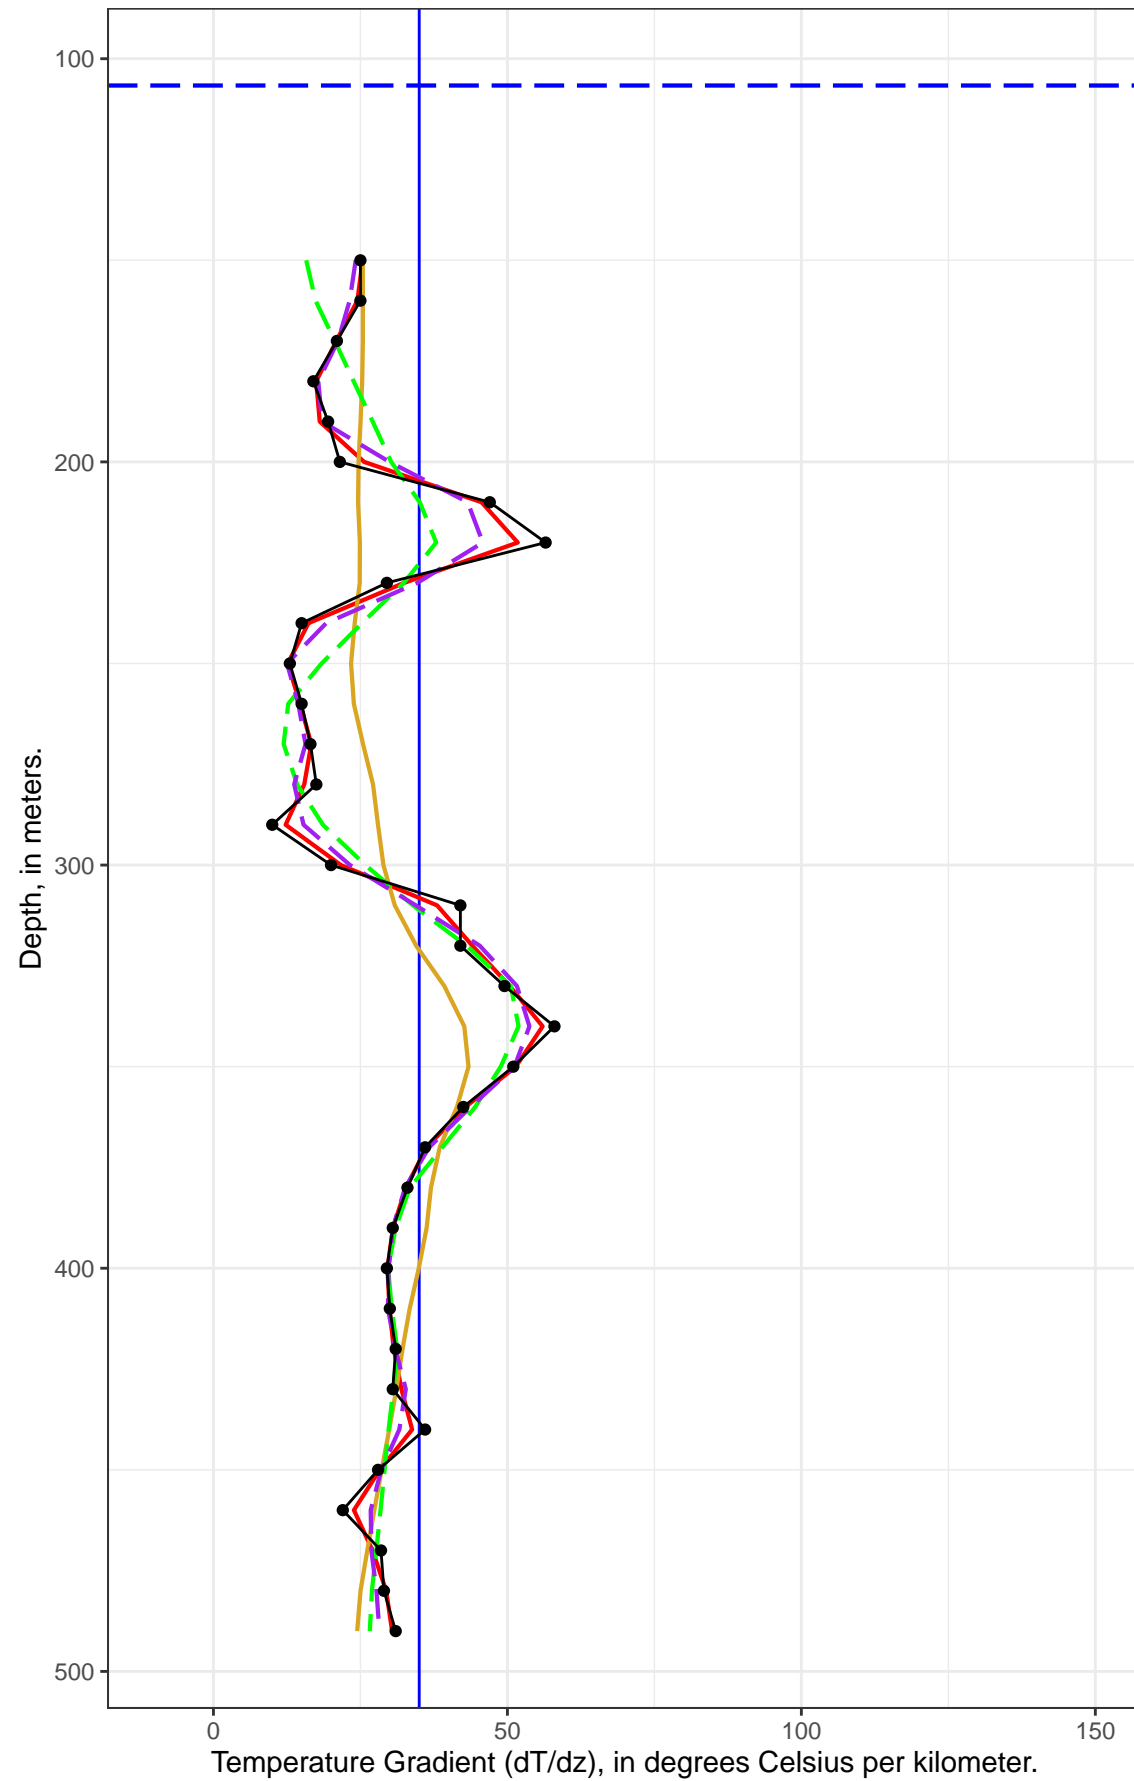

ID: 197 [Las\_Cruces\_S\_W] Second Derivative

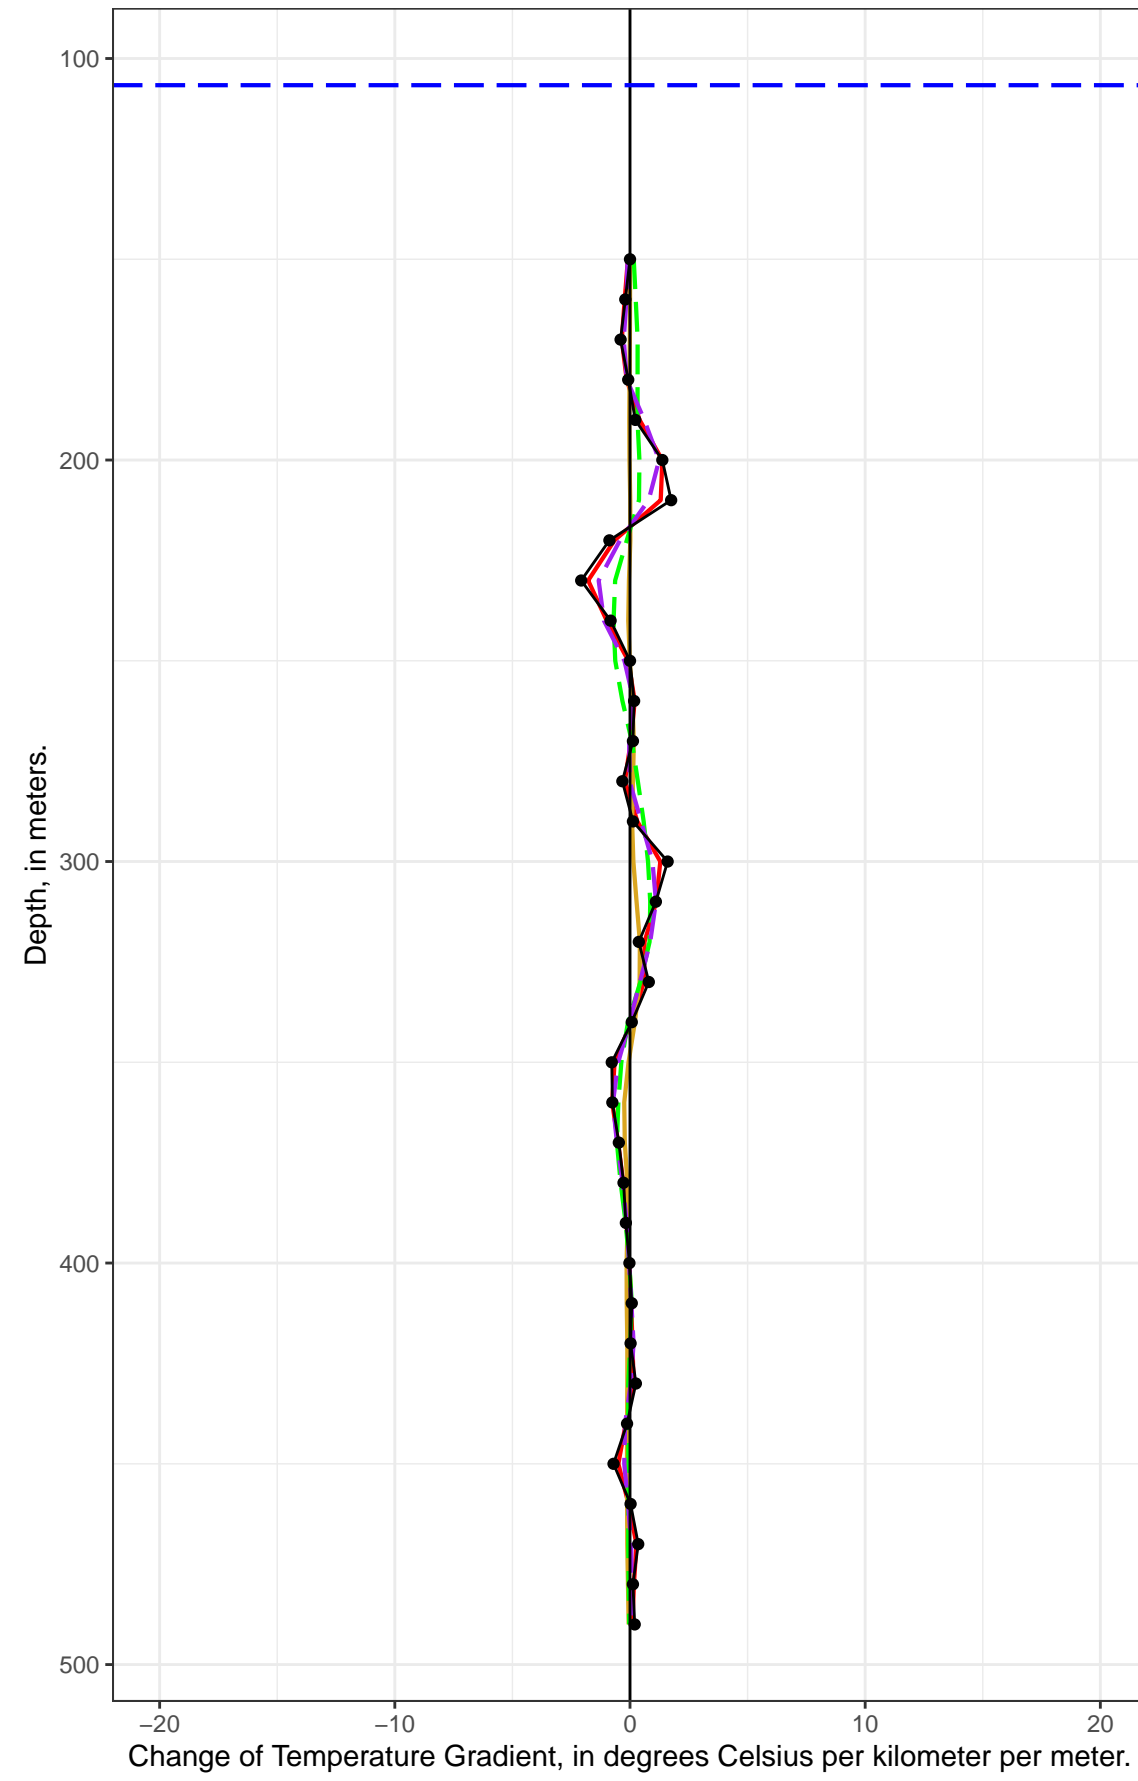

• Data — LOESS (AICC) — LOESS (constant) — LOESS (GCV) — Spline

• Data — LOESS (AICC) — LOESS (constant) — LOESS (GCV) — Spline

• Data — LOESS (AICC) — LOESS (constant) — LOESS (GCV) — Spline

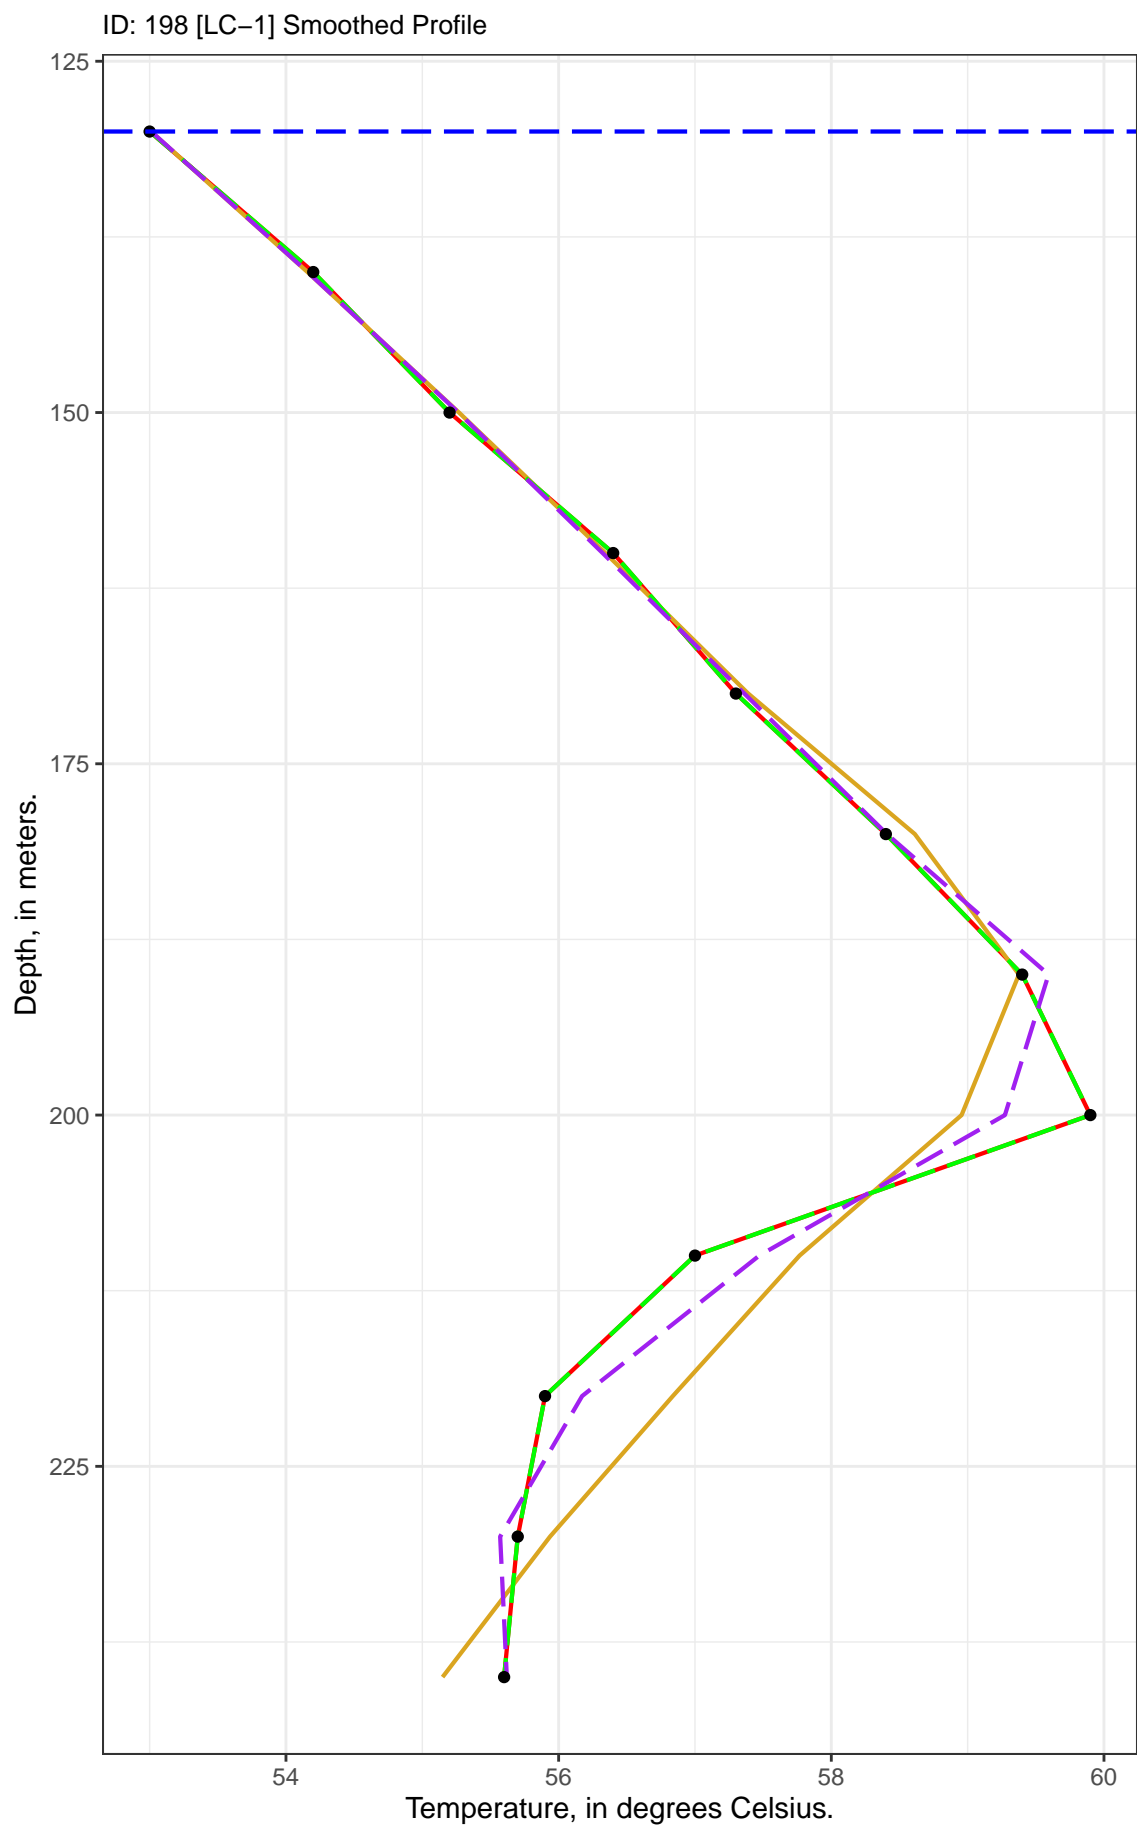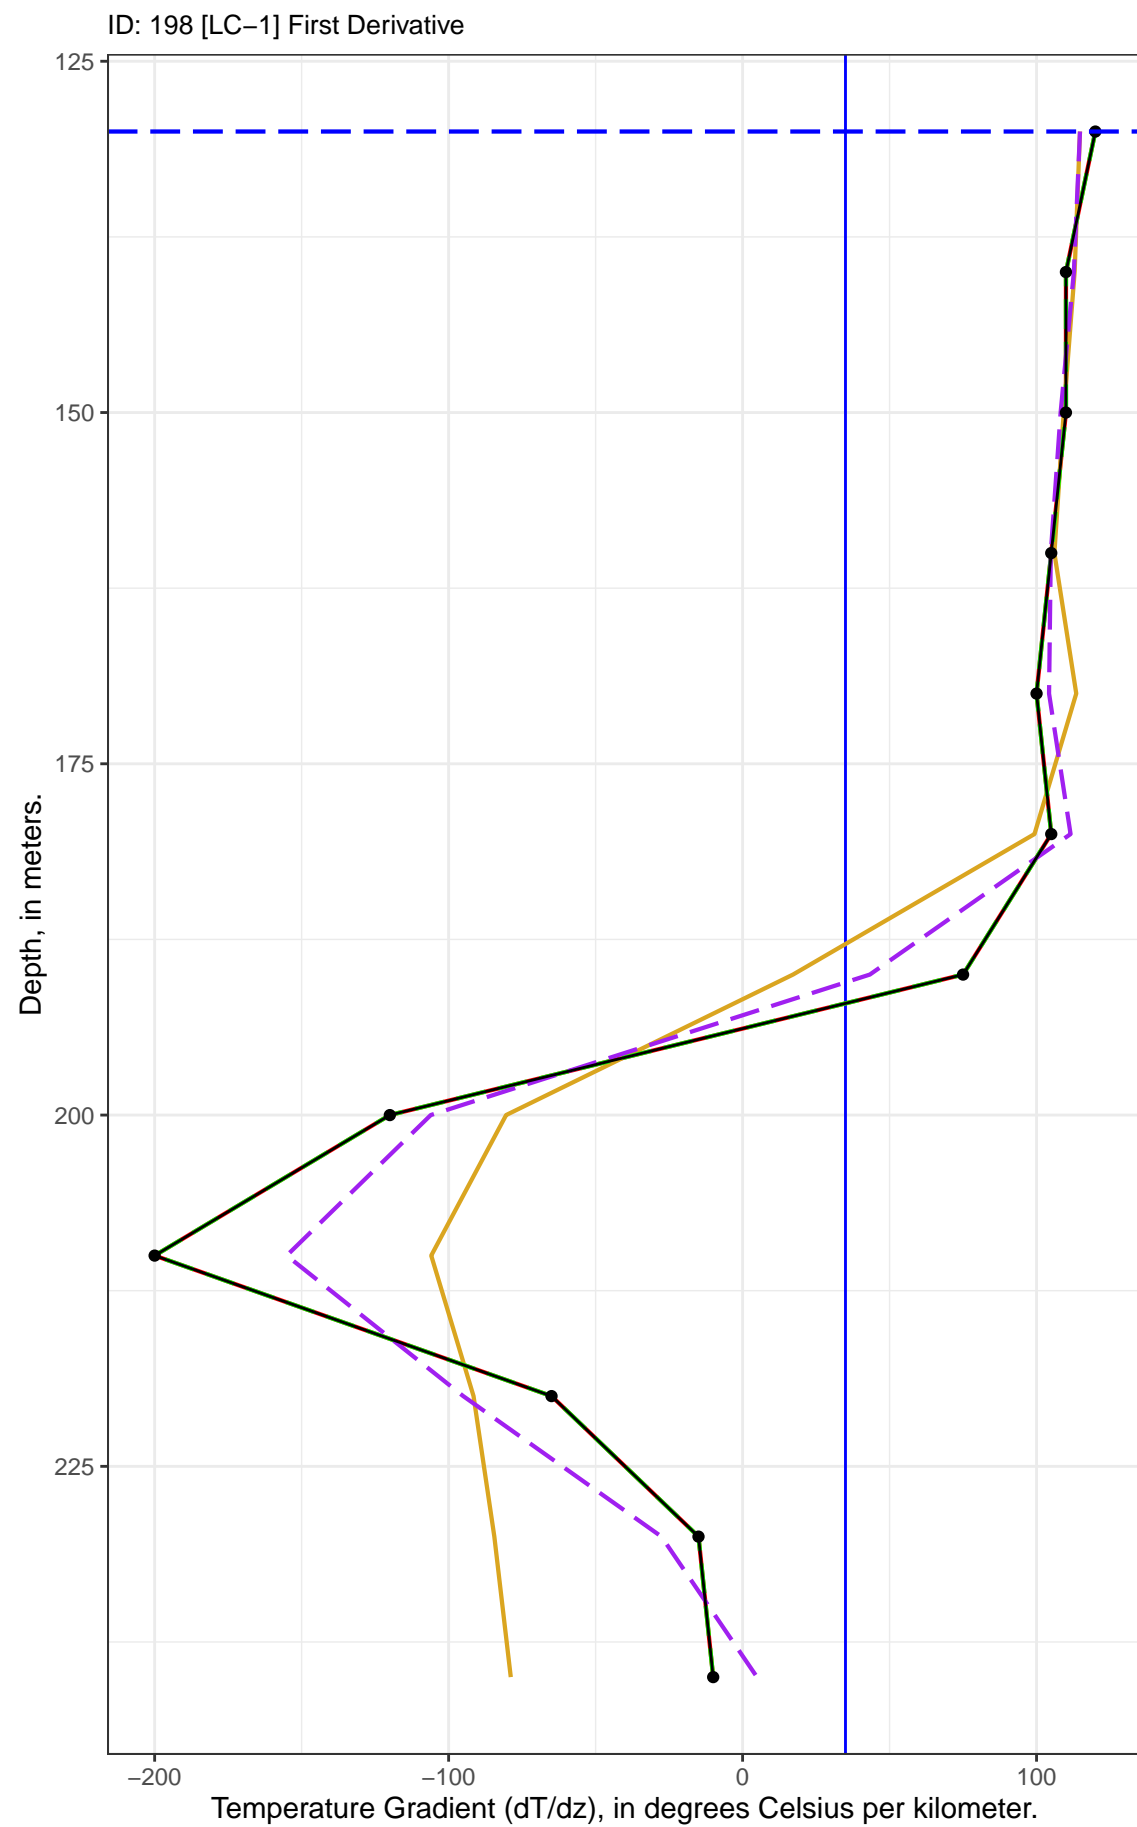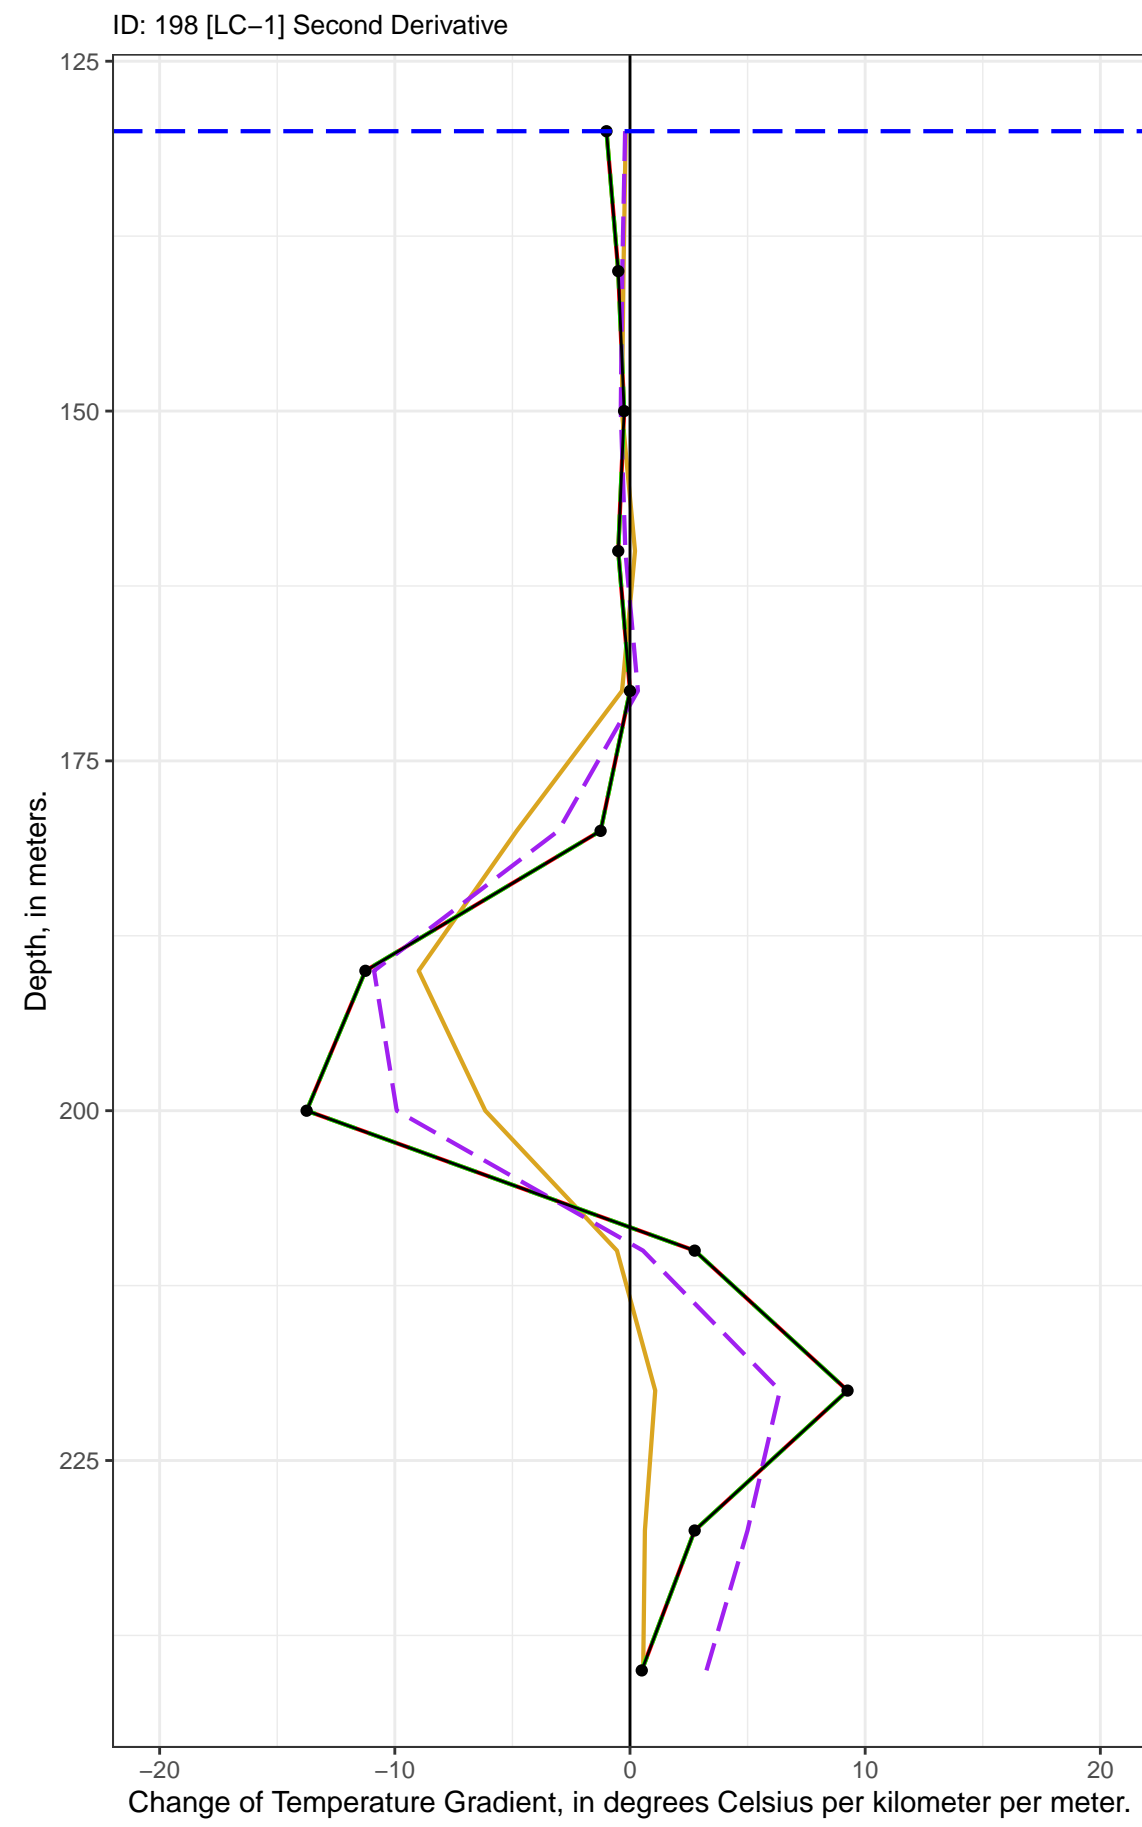

• Data — LOESS (AICC) — LOESS (constant) — LOESS (GCV) — Spline

• Data — LOESS (AICC) — LOESS (constant) — LOESS (GCV) — Spline

• Data — LOESS (AICC) — LOESS (constant) — LOESS (GCV) — Spline



ID: 199 [LC-2\_CITY\_TEST\_Well] Smoothed Profile

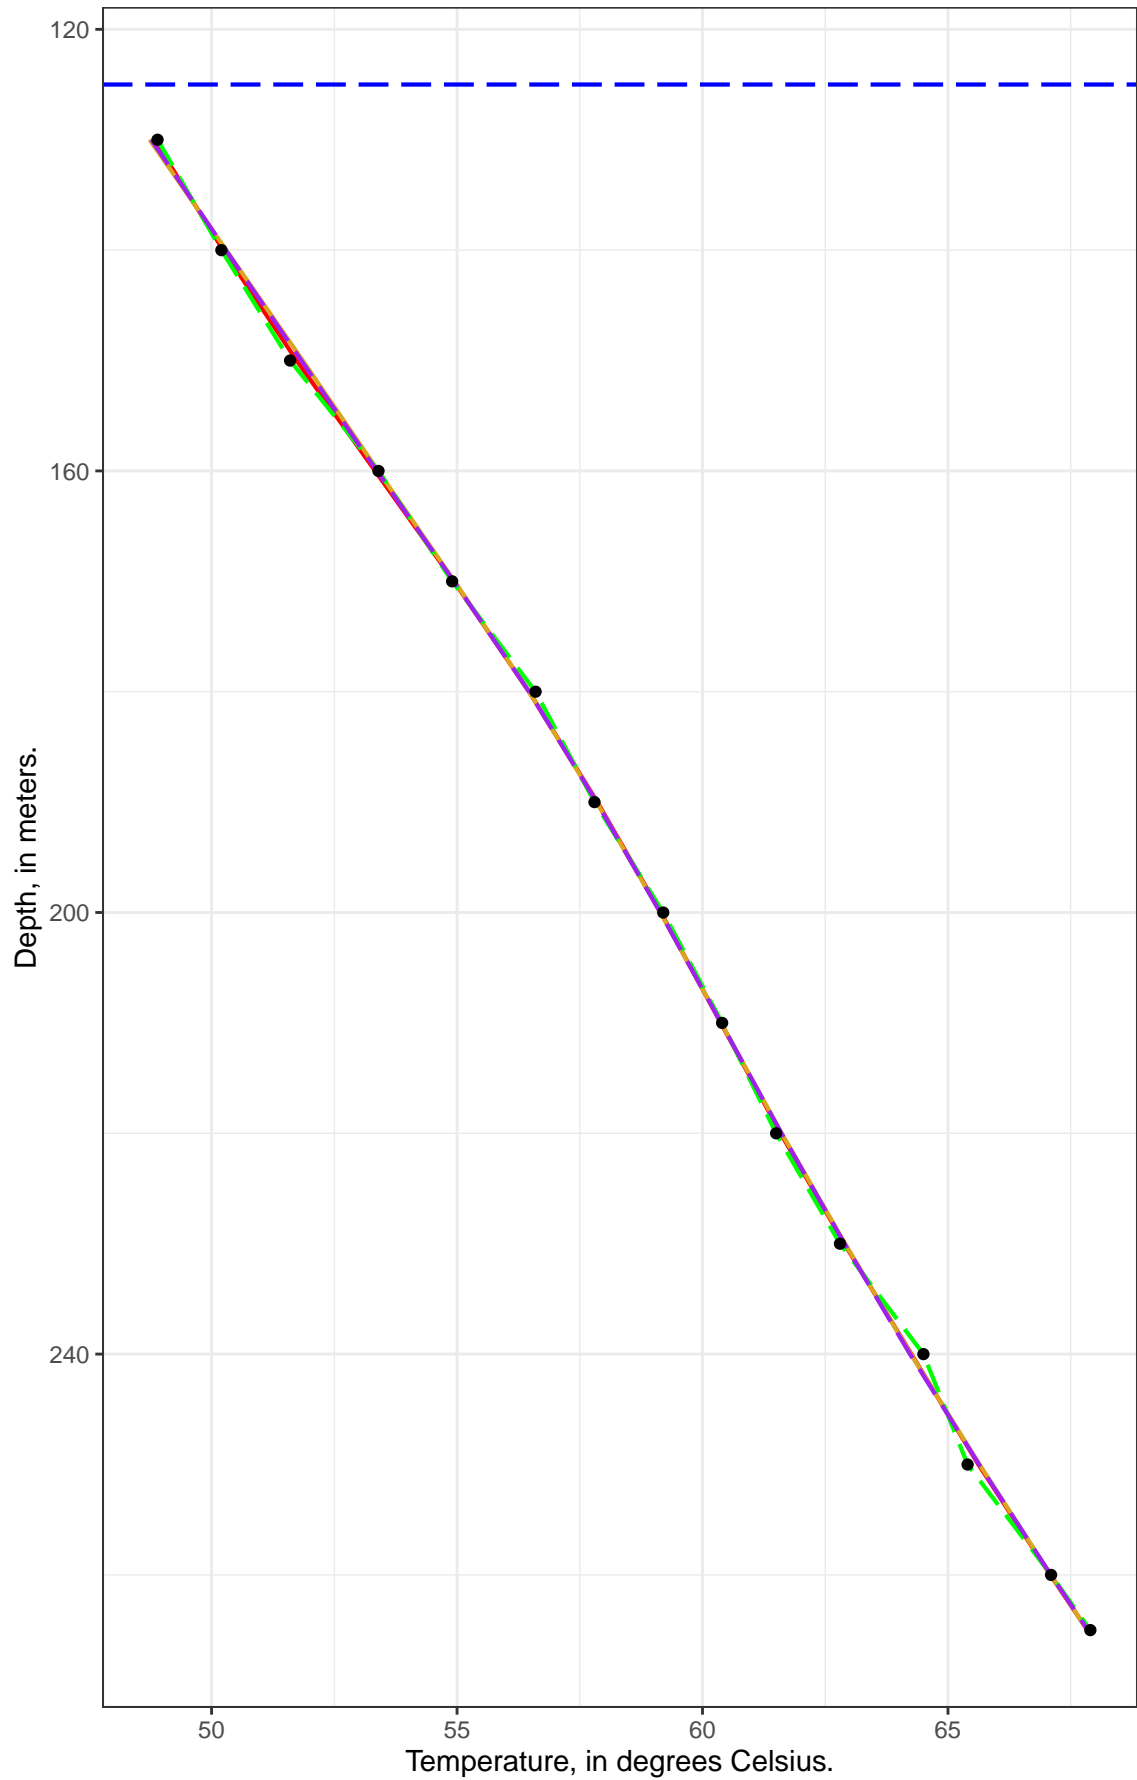

ID: 199 [LC-2\_CITY\_TEST\_Well] First Derivative

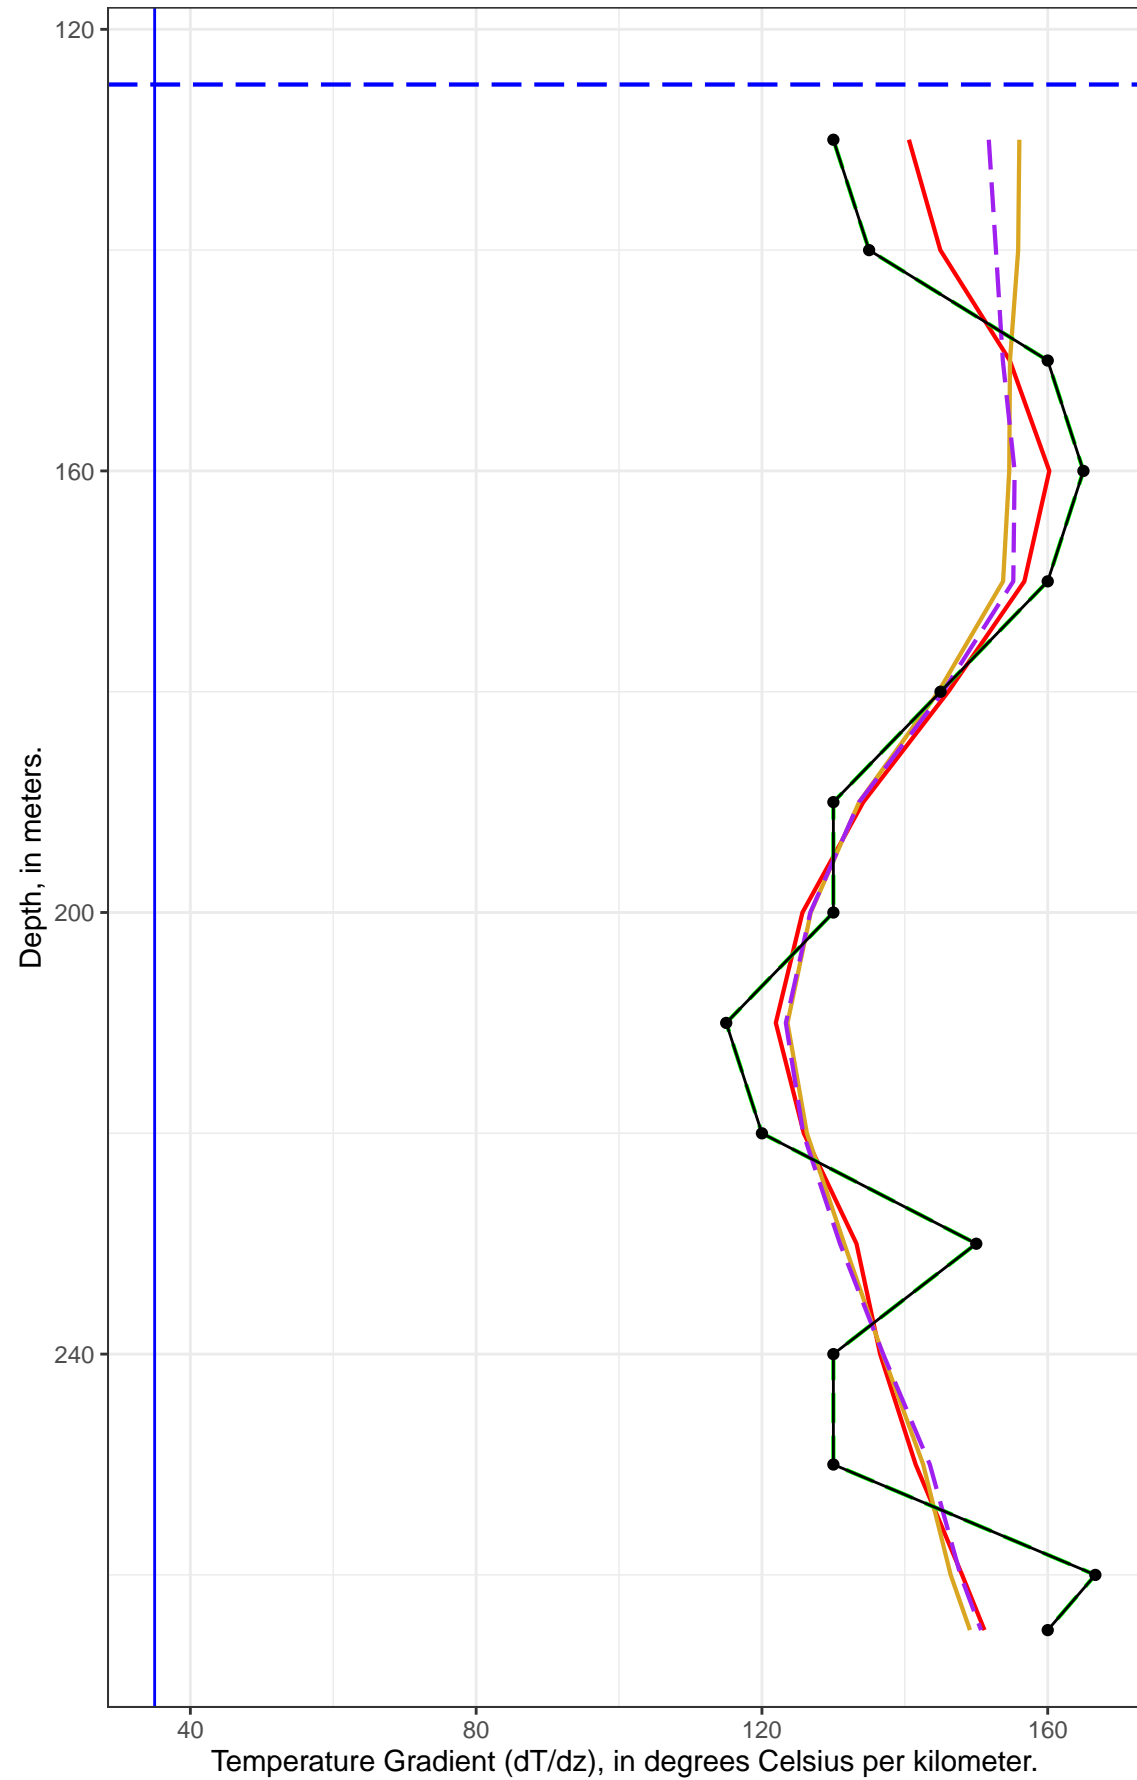

ID: 199 [LC-2\_CITY\_TEST\_Well] Second Derivative

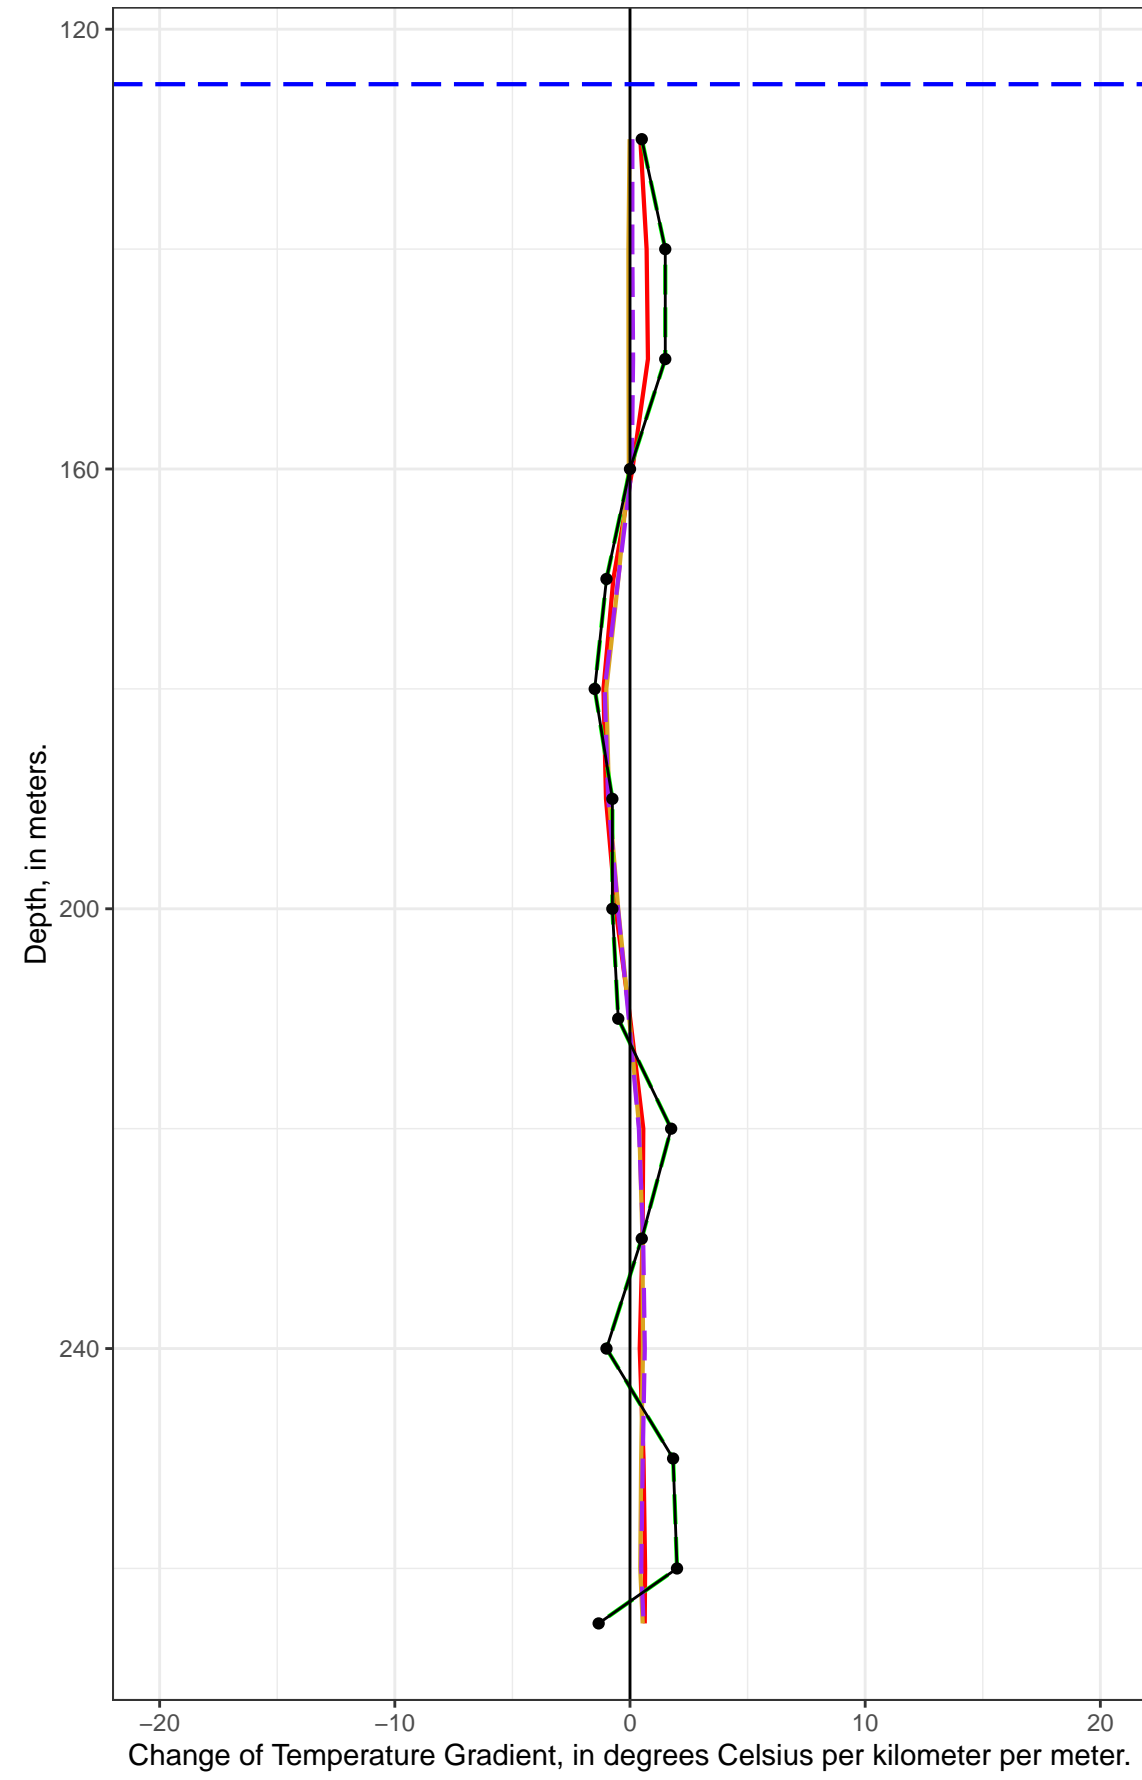

• Data — LOESS (AICC) — LOESS (constant) — LOESS (GCV) — Spline

• Data — LOESS (AICC) — LOESS (constant) — LOESS (GCV) — Spline

• Data — LOESS (AICC) — LOESS (constant) — LOESS (GCV) — Spline

ID: 200 [LC-2F] Smoothed Profile

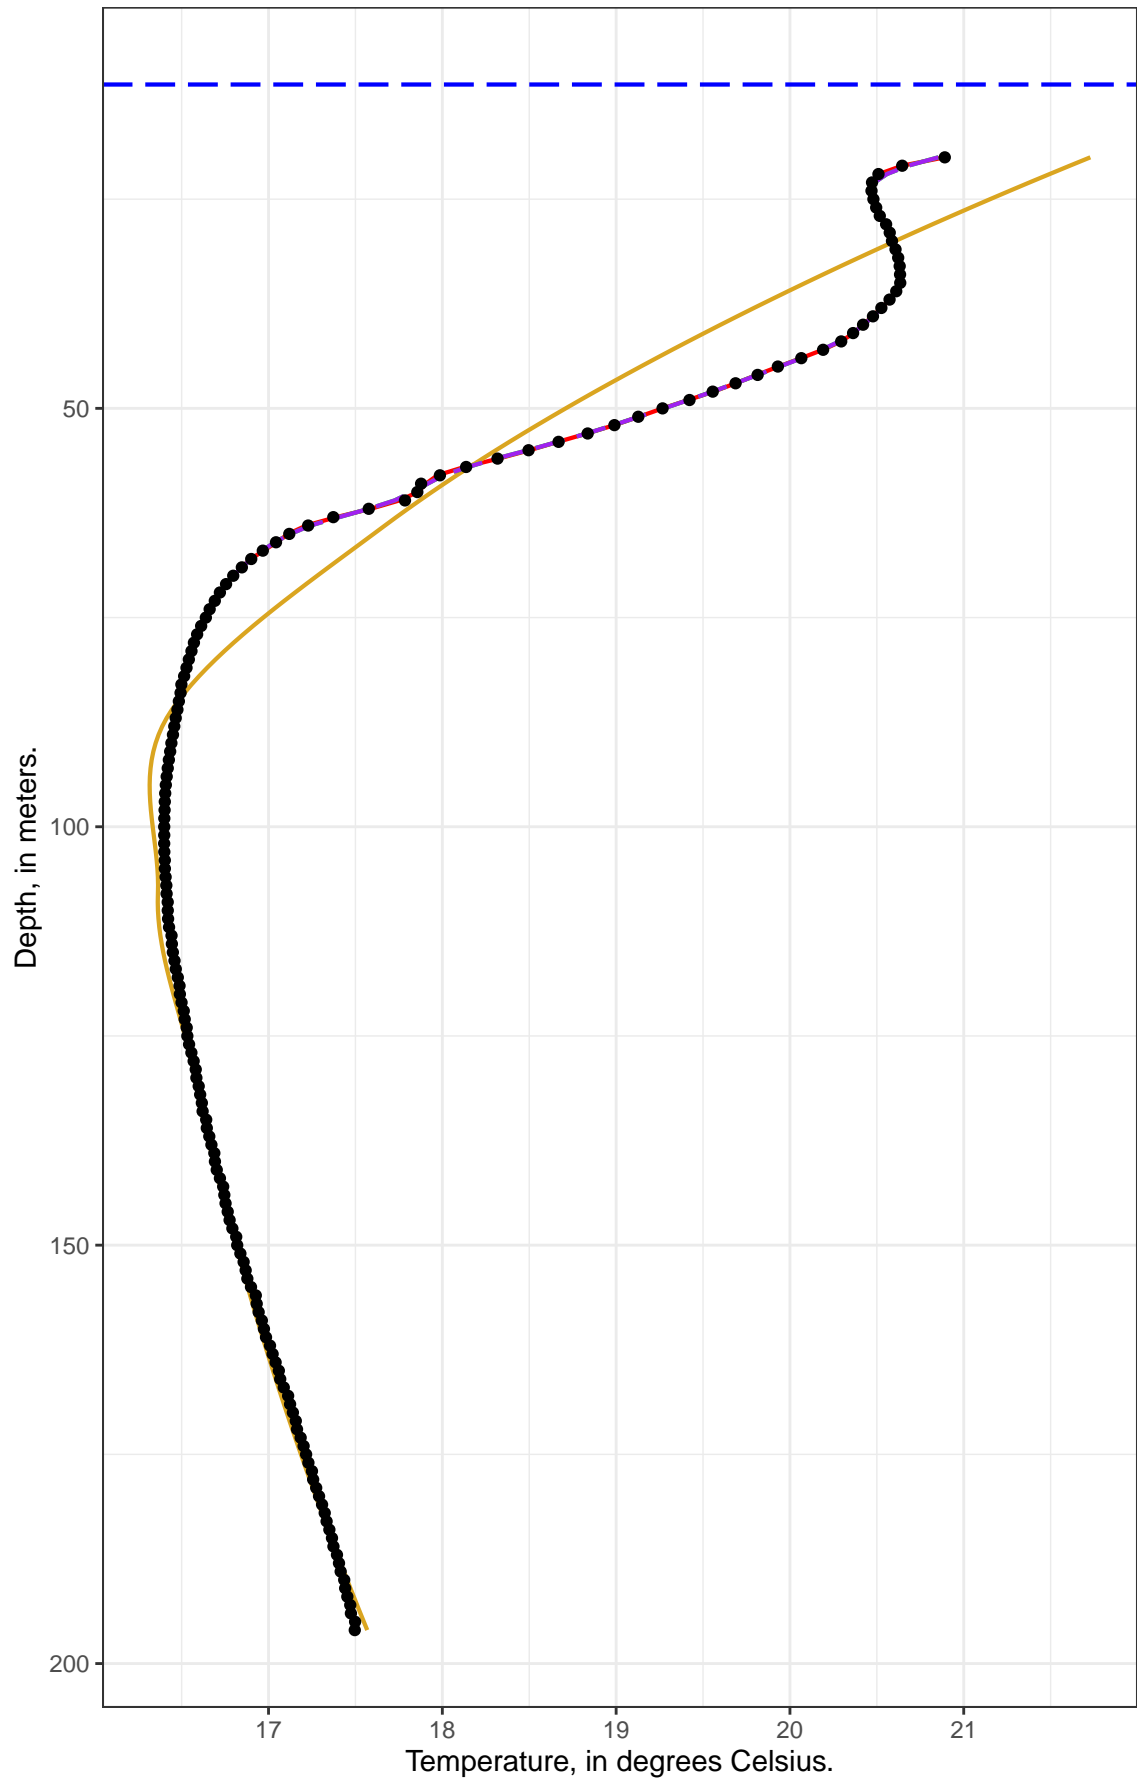

ID: 200 [LC-2F] First Derivative

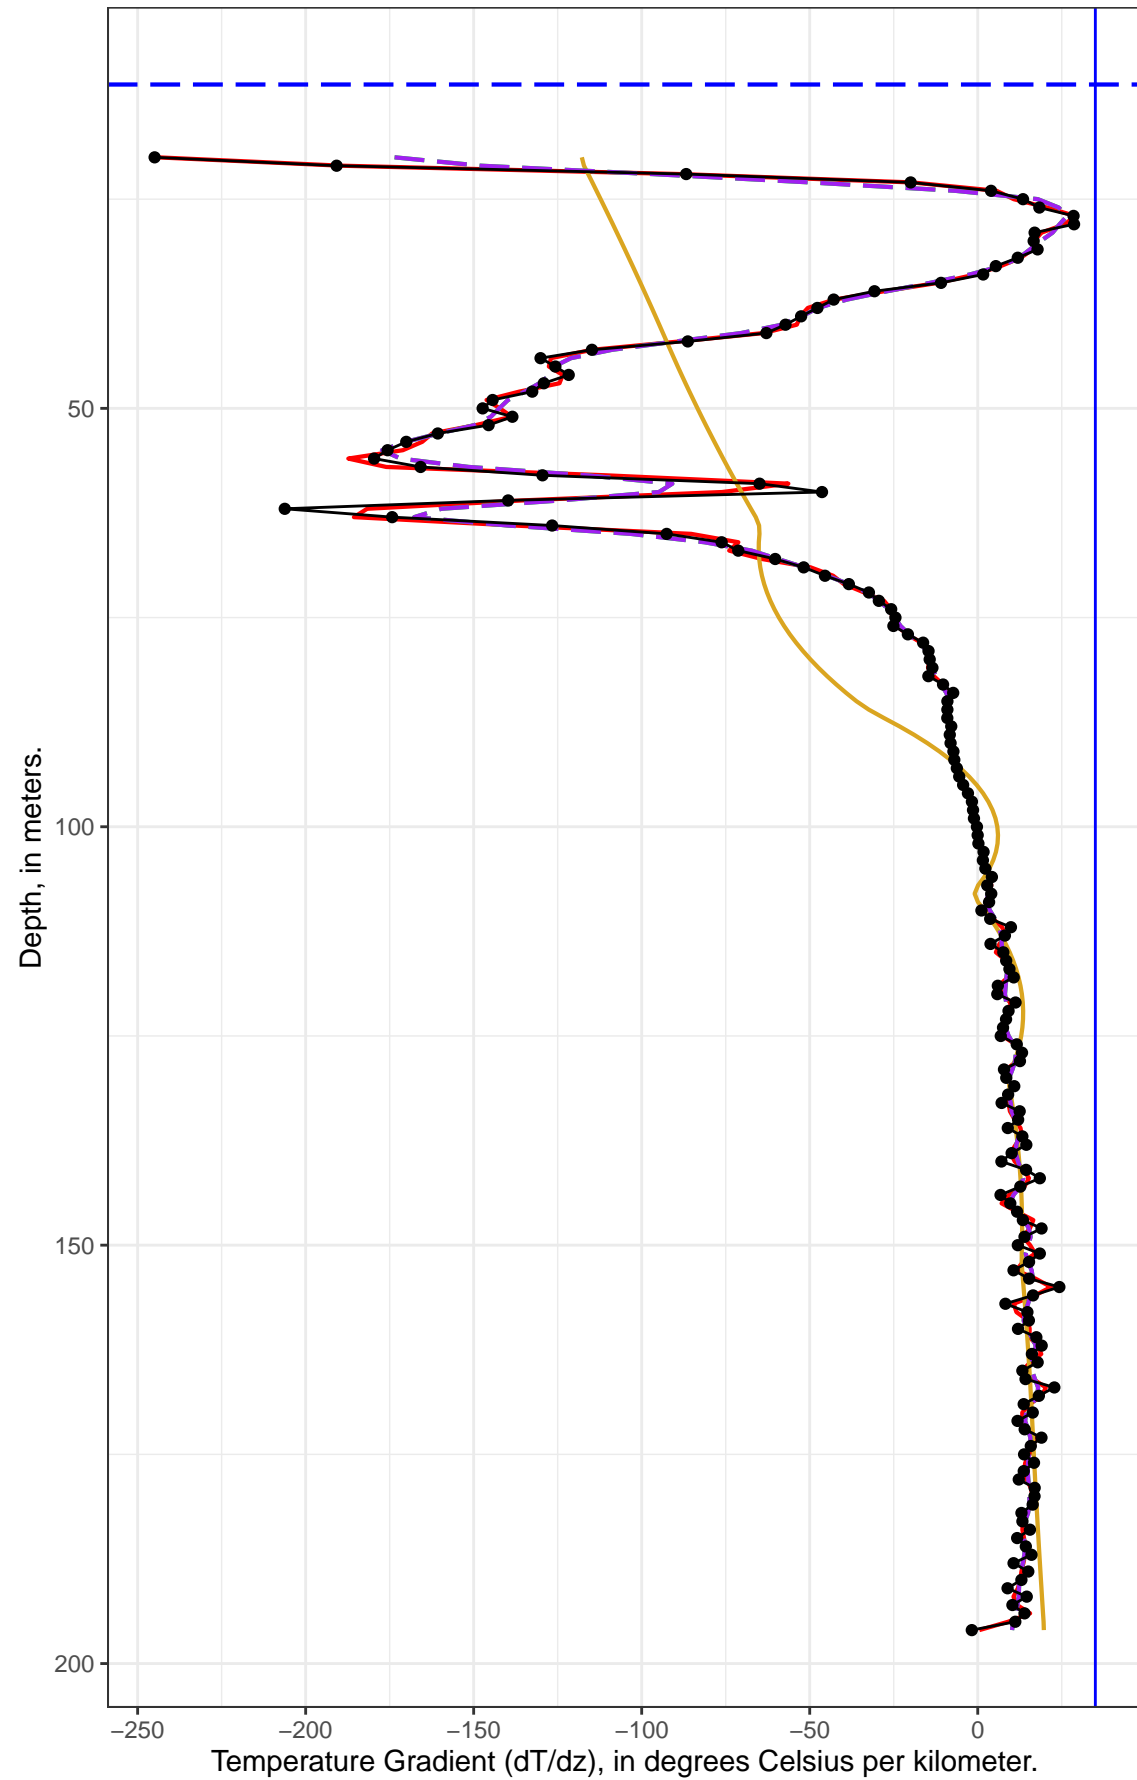

ID: 200 [LC-2F] Second Derivative

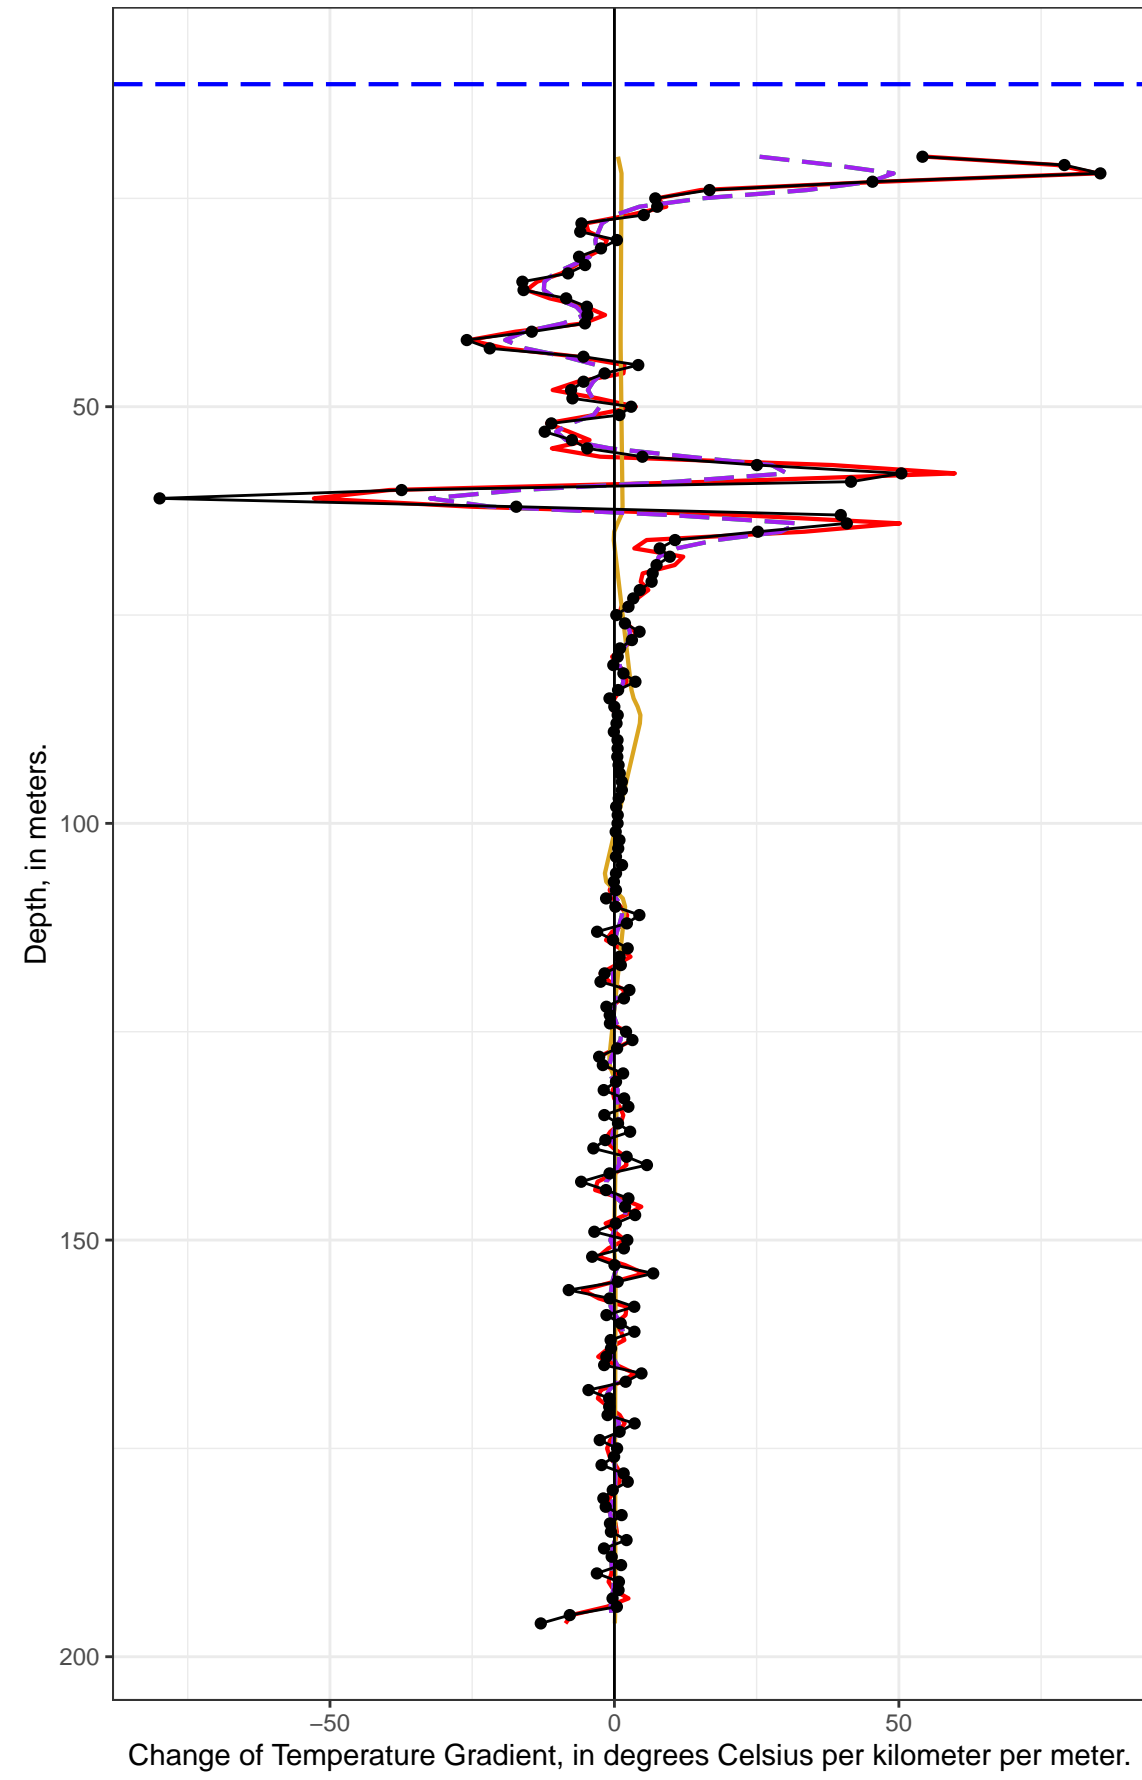

• Data — LOESS (AICC) — LOESS (constant) — LOESS (GCV) — Spline

• Data — LOESS (AICC) — LOESS (constant) — LOESS (GCV) — Spline

• Data — LOESS (AICC) — LOESS (constant) — LOESS (GCV) — Spline

ID: 201 [L\_Well\_RADIIUM\_Springs] Smoothed Profile

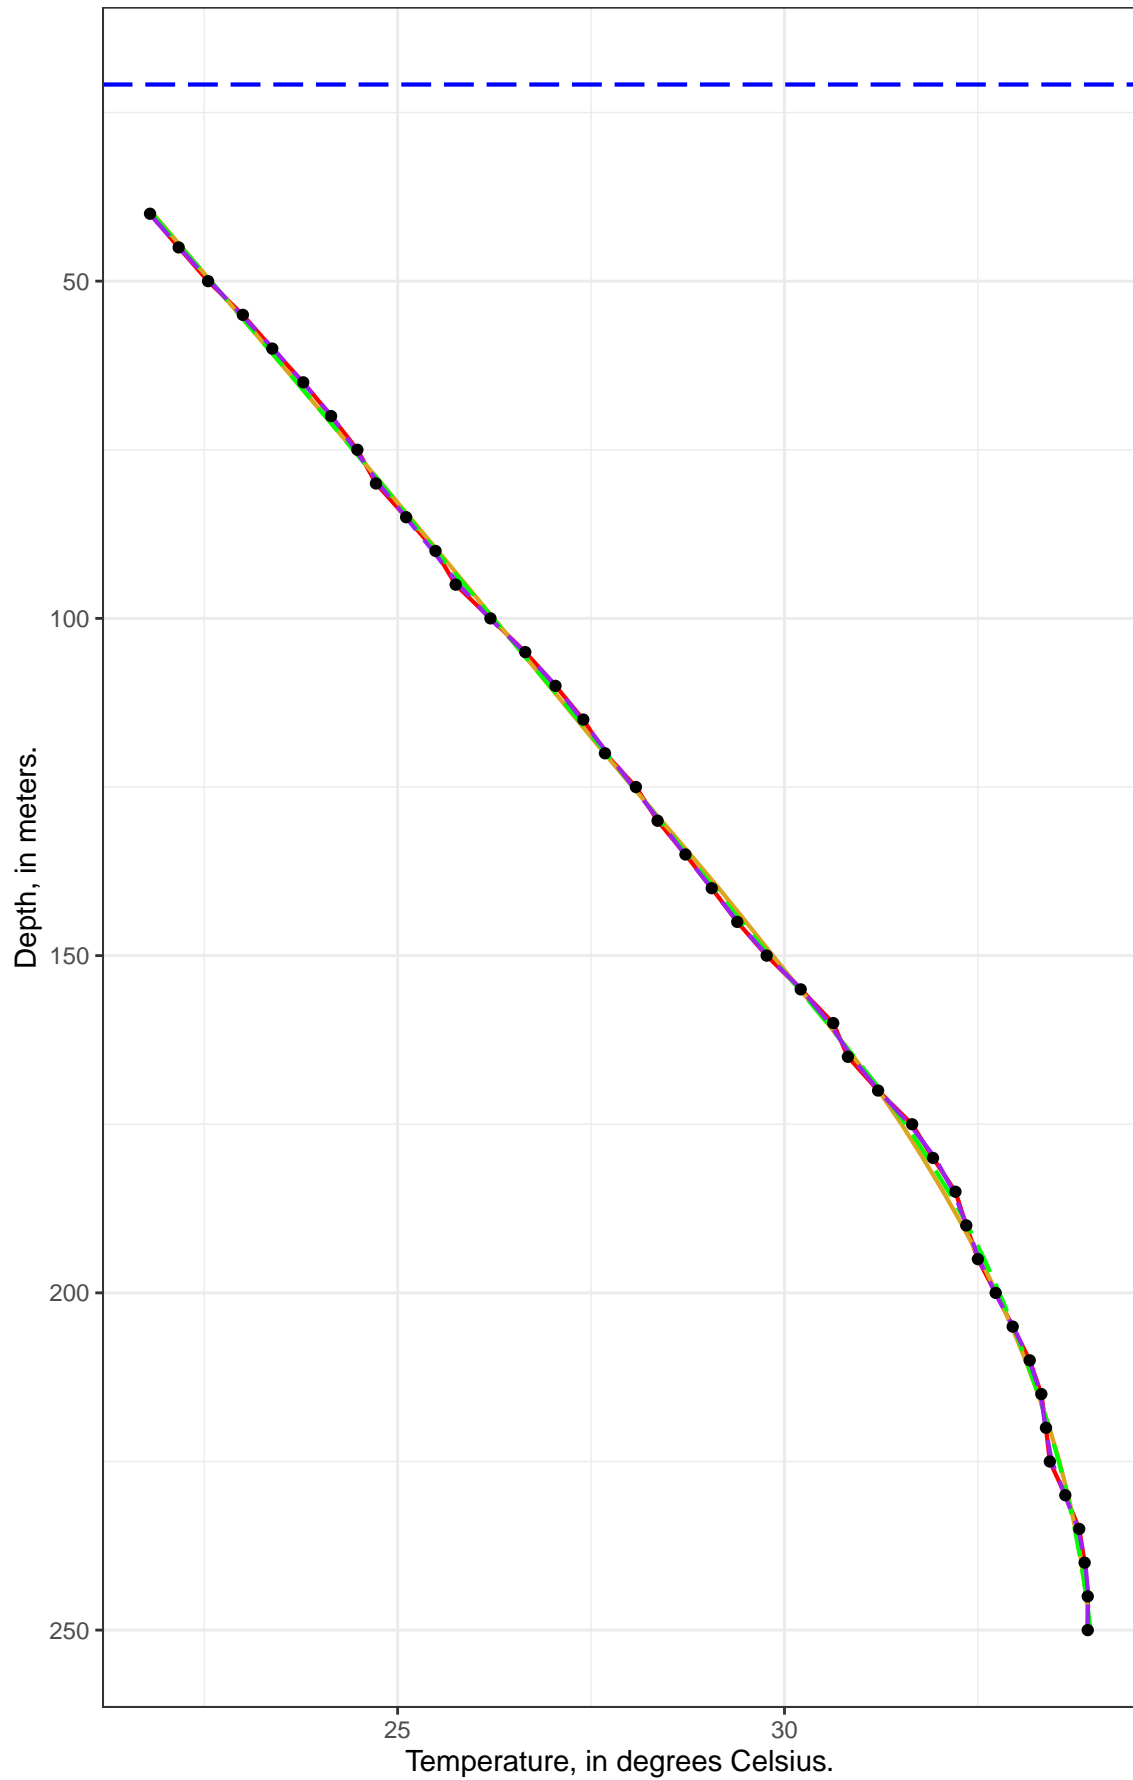

ID: 201 [L\_Well\_RADIIUM\_Springs] First Derivative

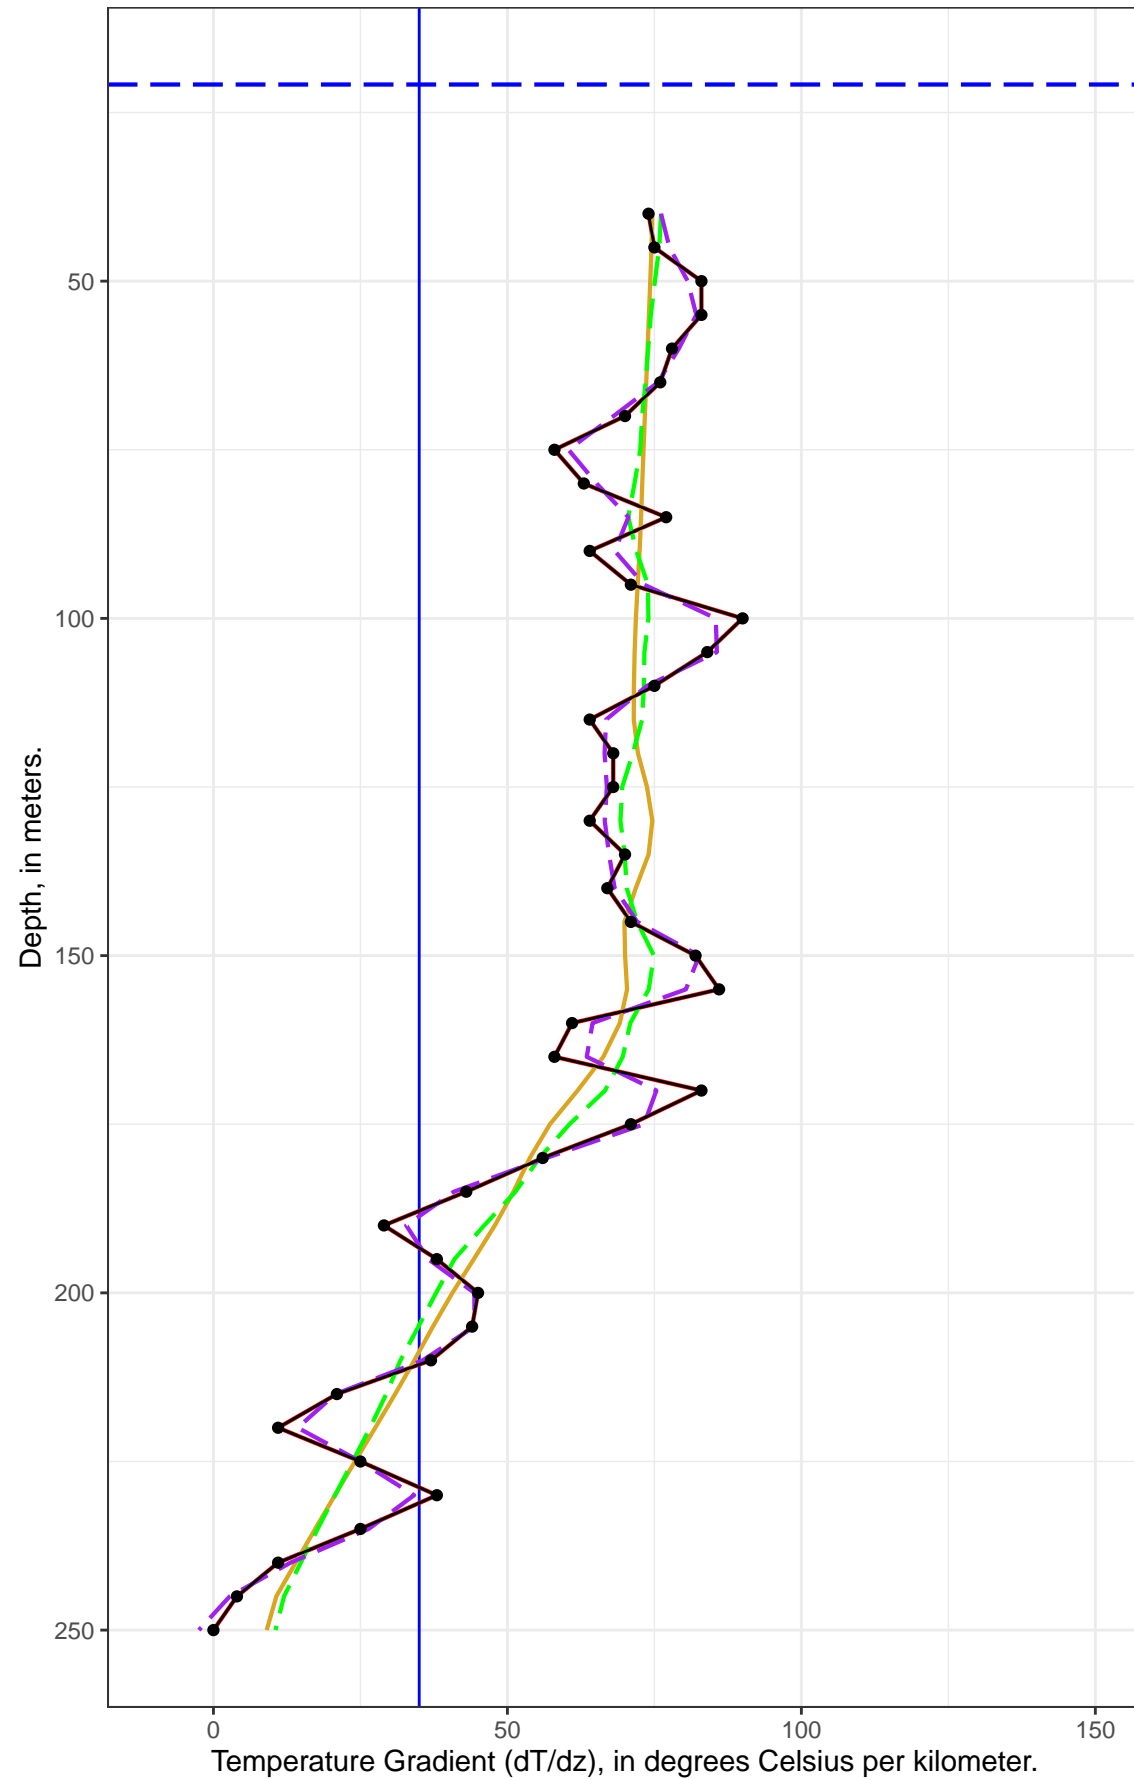

ID: 201 [L\_Well\_RADIIUM\_Springs] Second Derivative

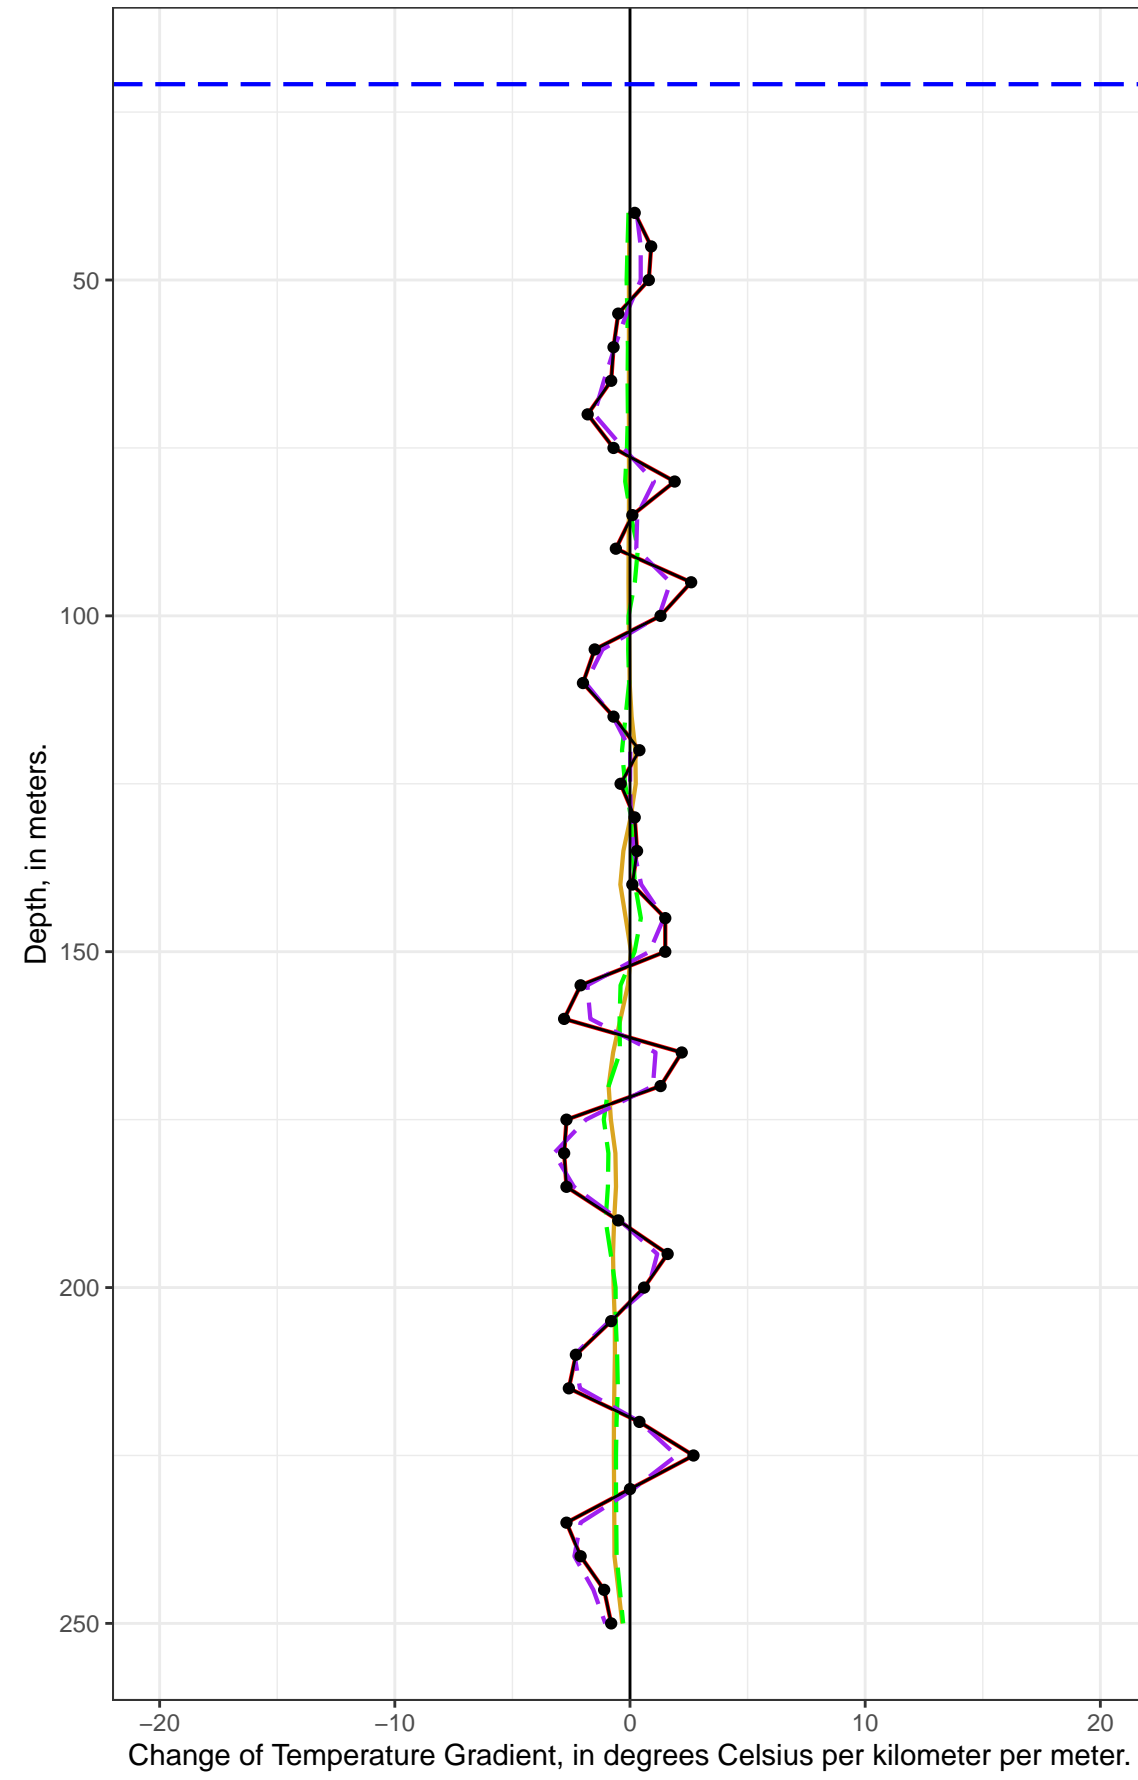

• Data — LOESS (AICC) — LOESS (constant) — LOESS (GCV) — Spline

• Data — LOESS (AICC) — LOESS (constant) — LOESS (GCV) — Spline

• Data — LOESS (AICC) — LOESS (constant) — LOESS (GCV) — Spline

ID: 202 [LMV-2B] Smoothed Profile

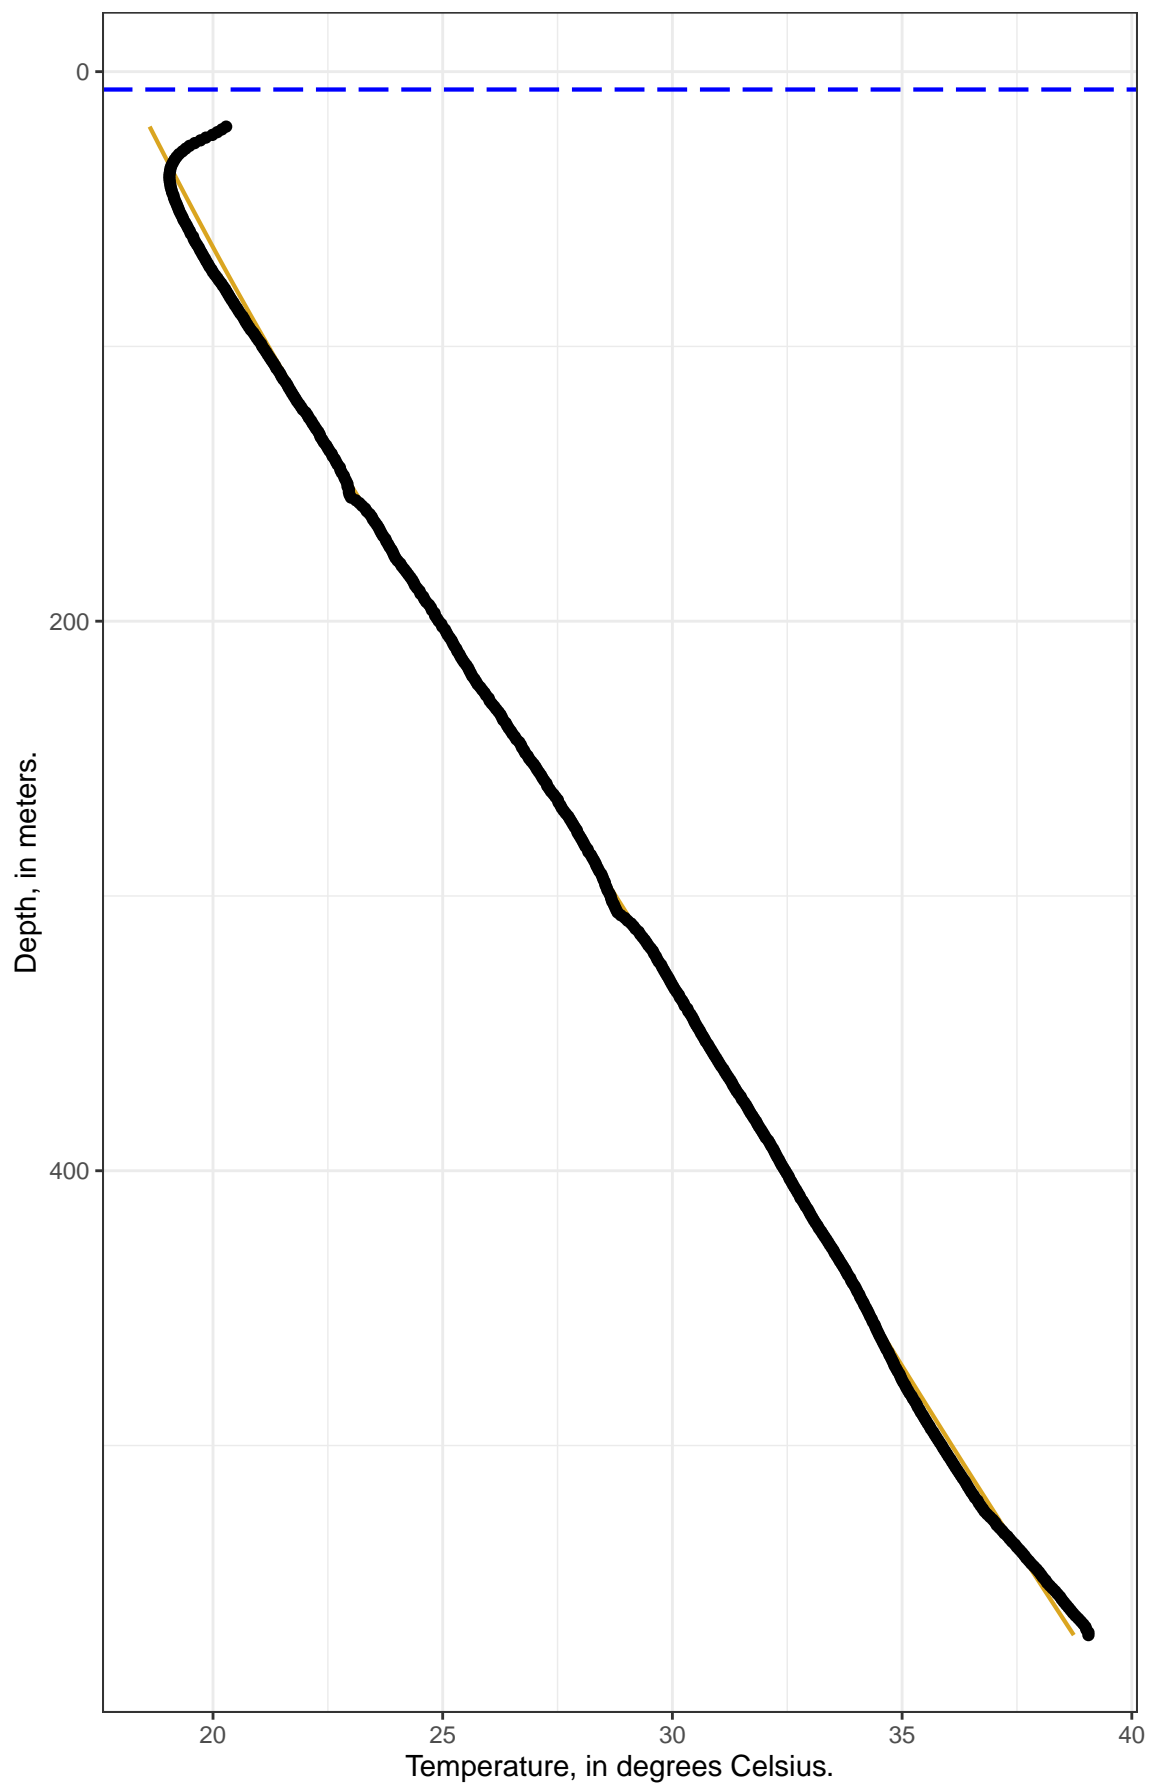

ID: 202 [LMV-2B] First Derivative

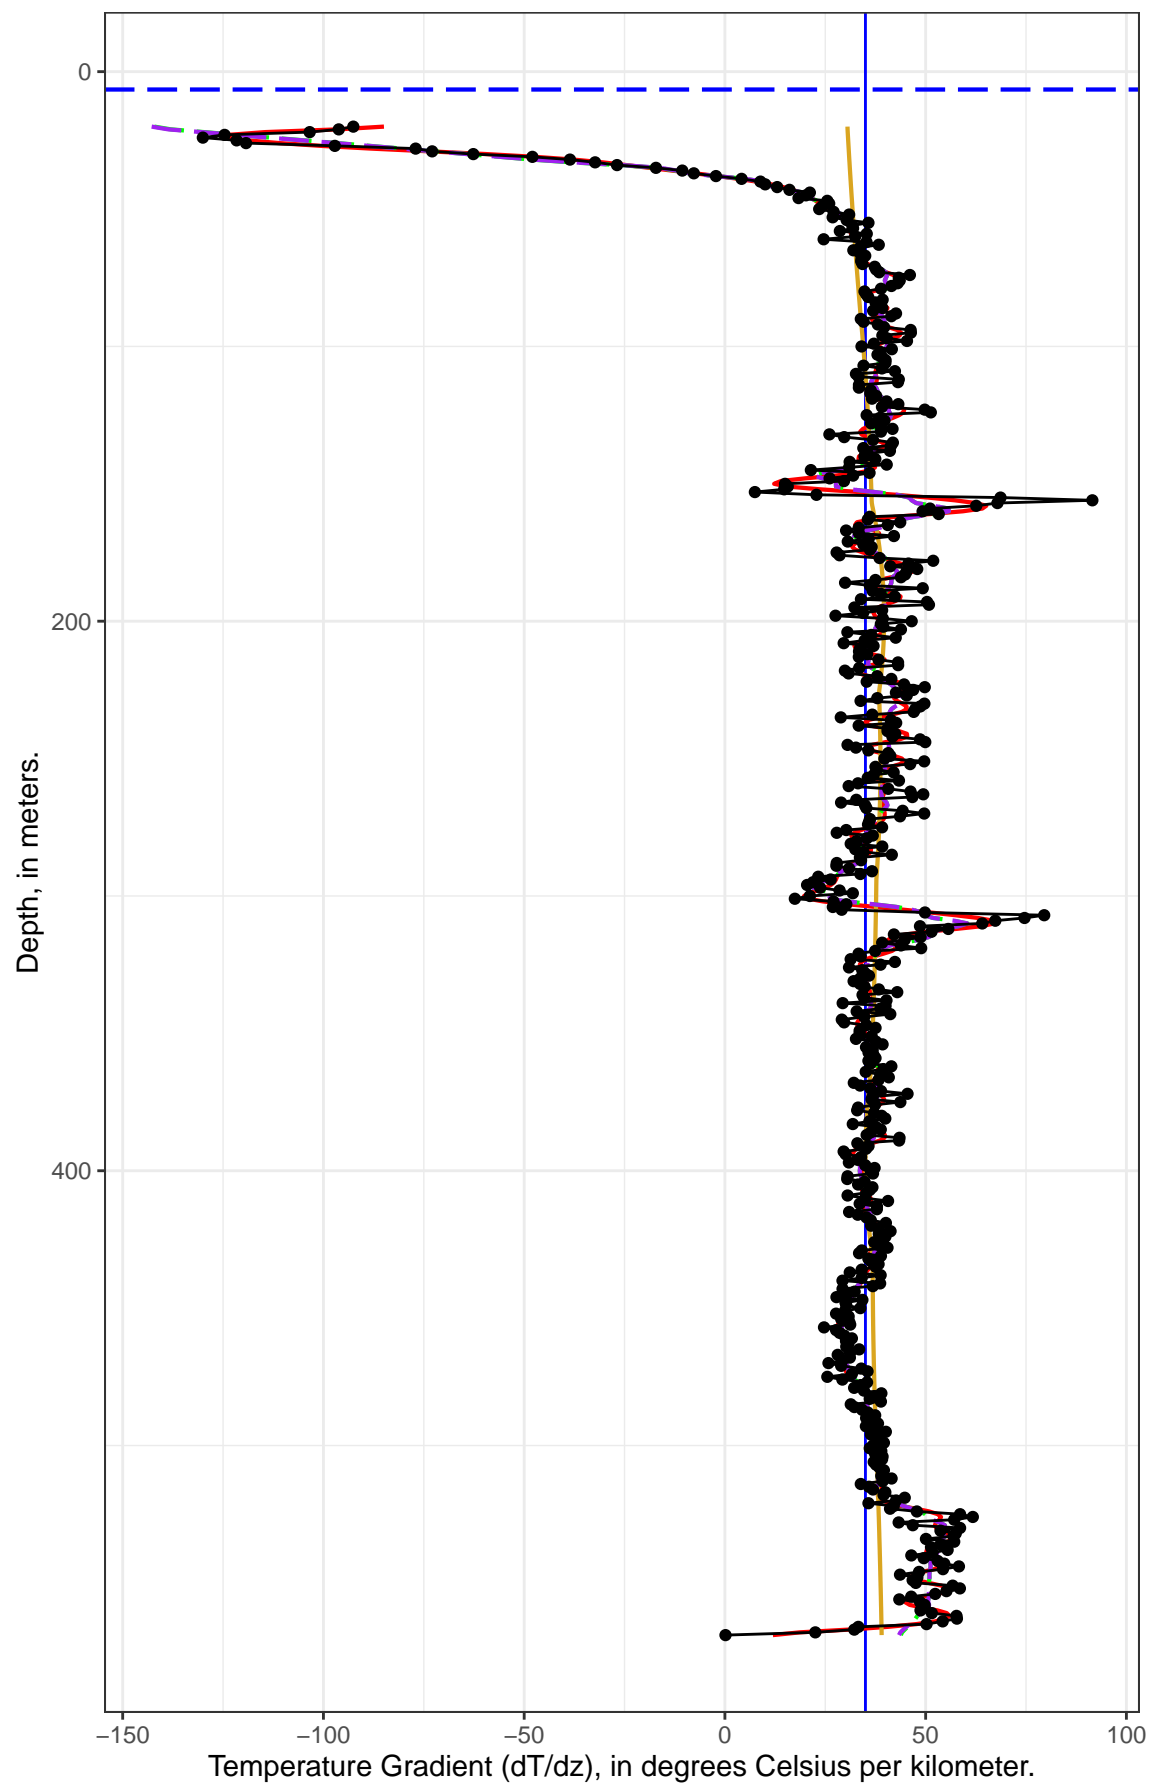

ID: 202 [LMV-2B] Second Derivative

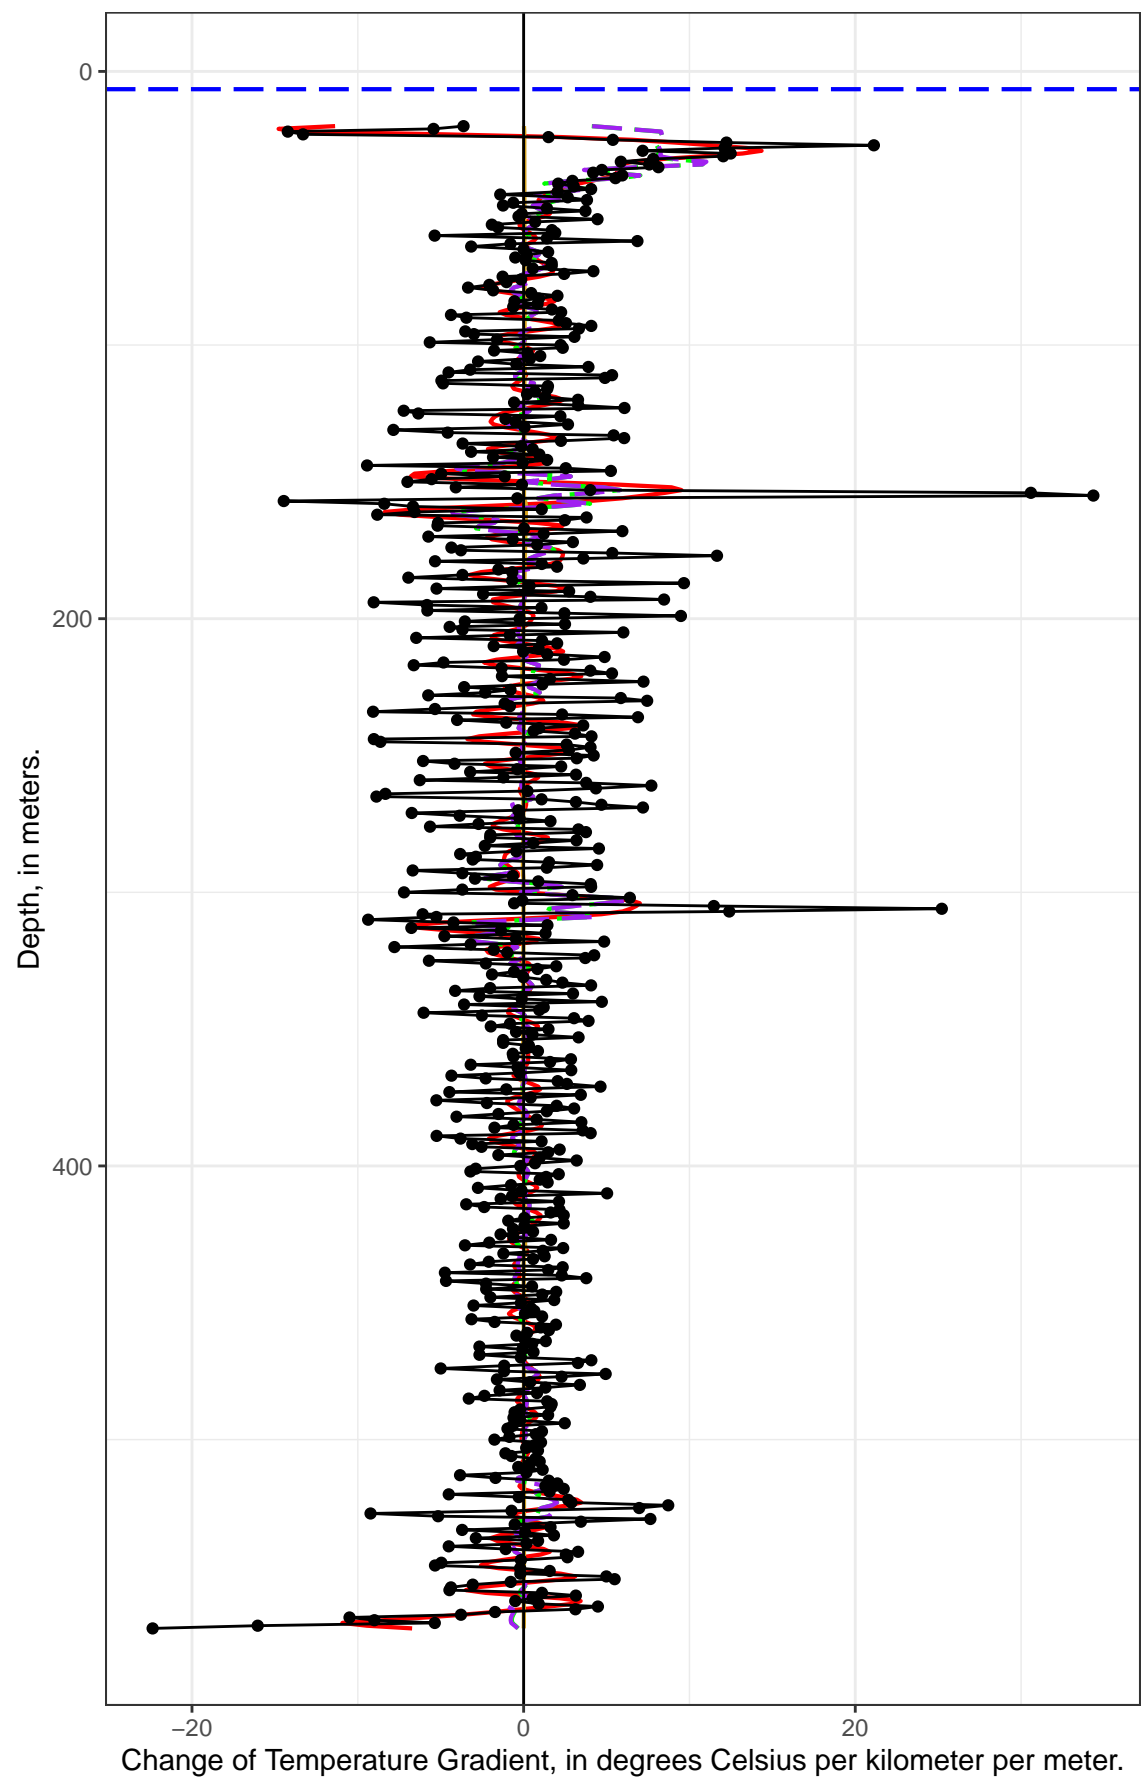

• Data • LOESS (AICC) • LOESS (constant) • LOESS (GCV) • Spline

• Data • LOESS (AICC) • LOESS (constant) • LOESS (GCV) • Spline

• Data • LOESS (AICC) • LOESS (constant) • LOESS (GCV) • Spline

ID: 203 [M-2A] Smoothed Profile

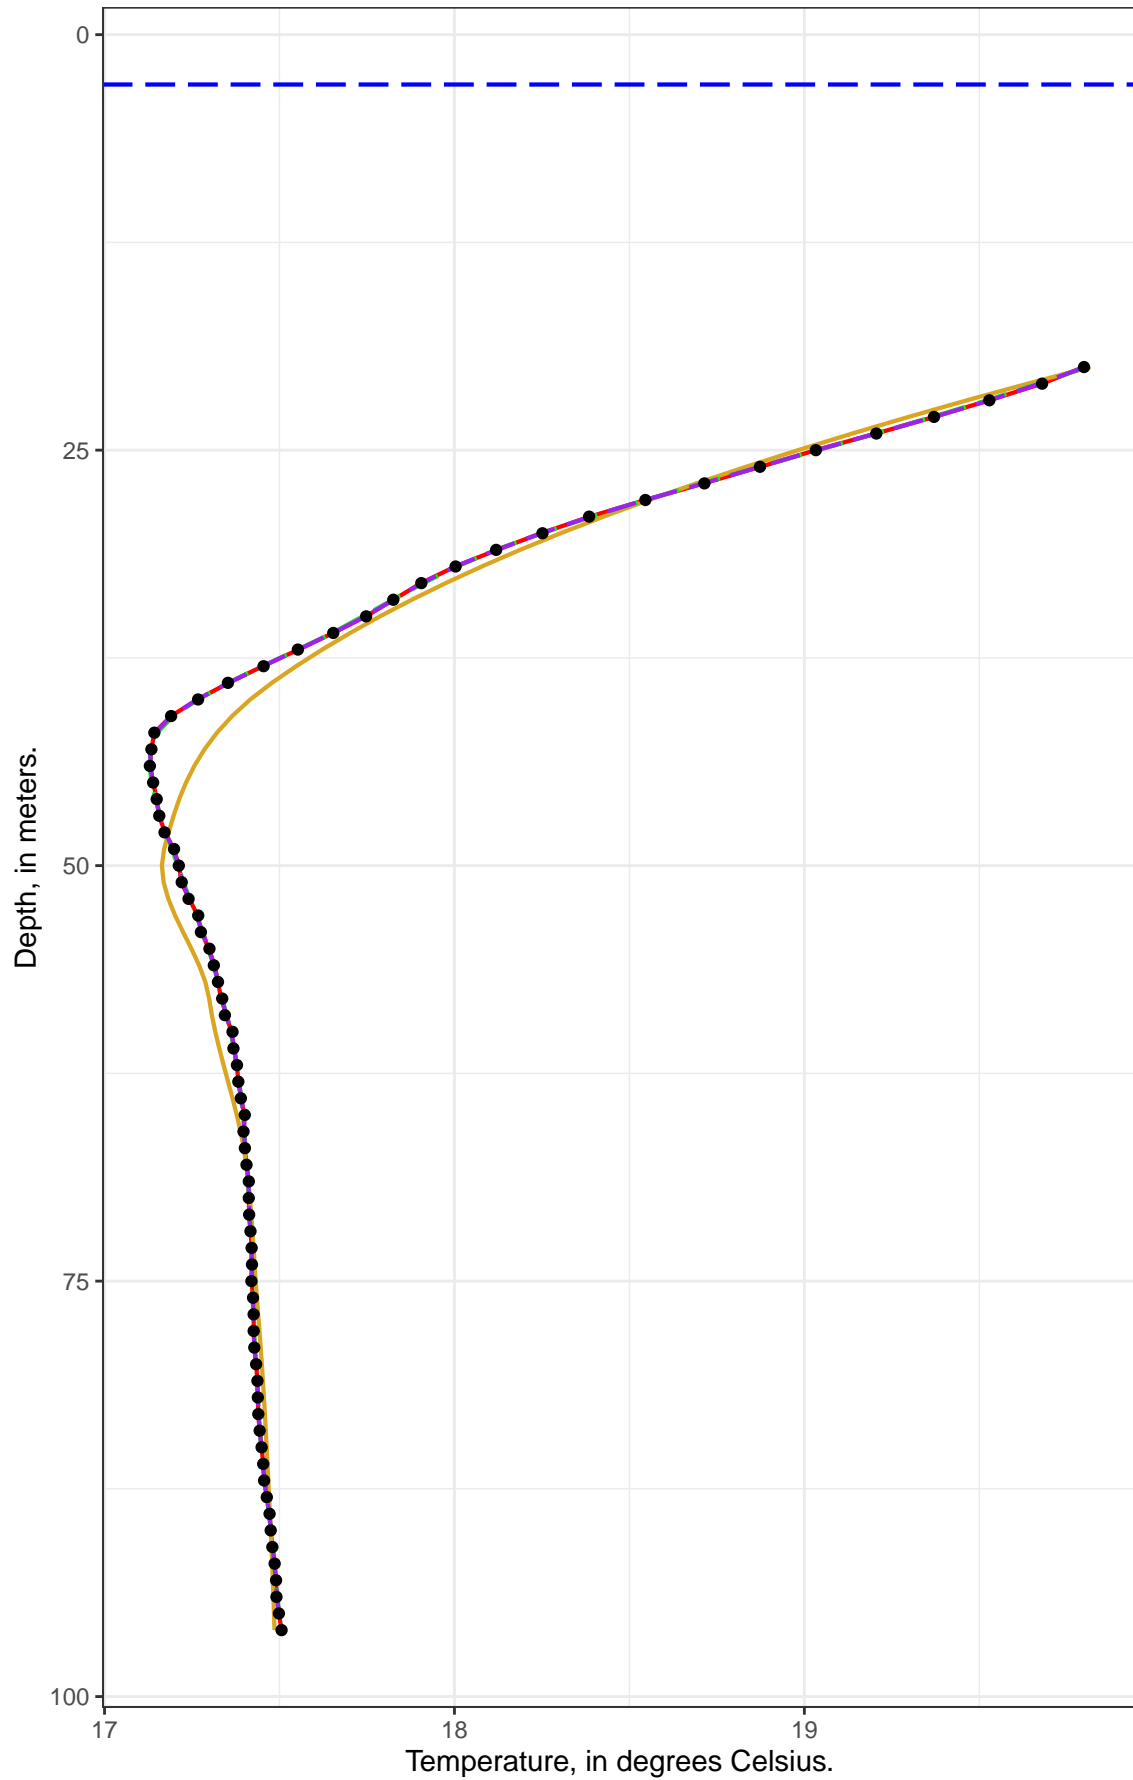

ID: 203 [M-2A] First Derivative

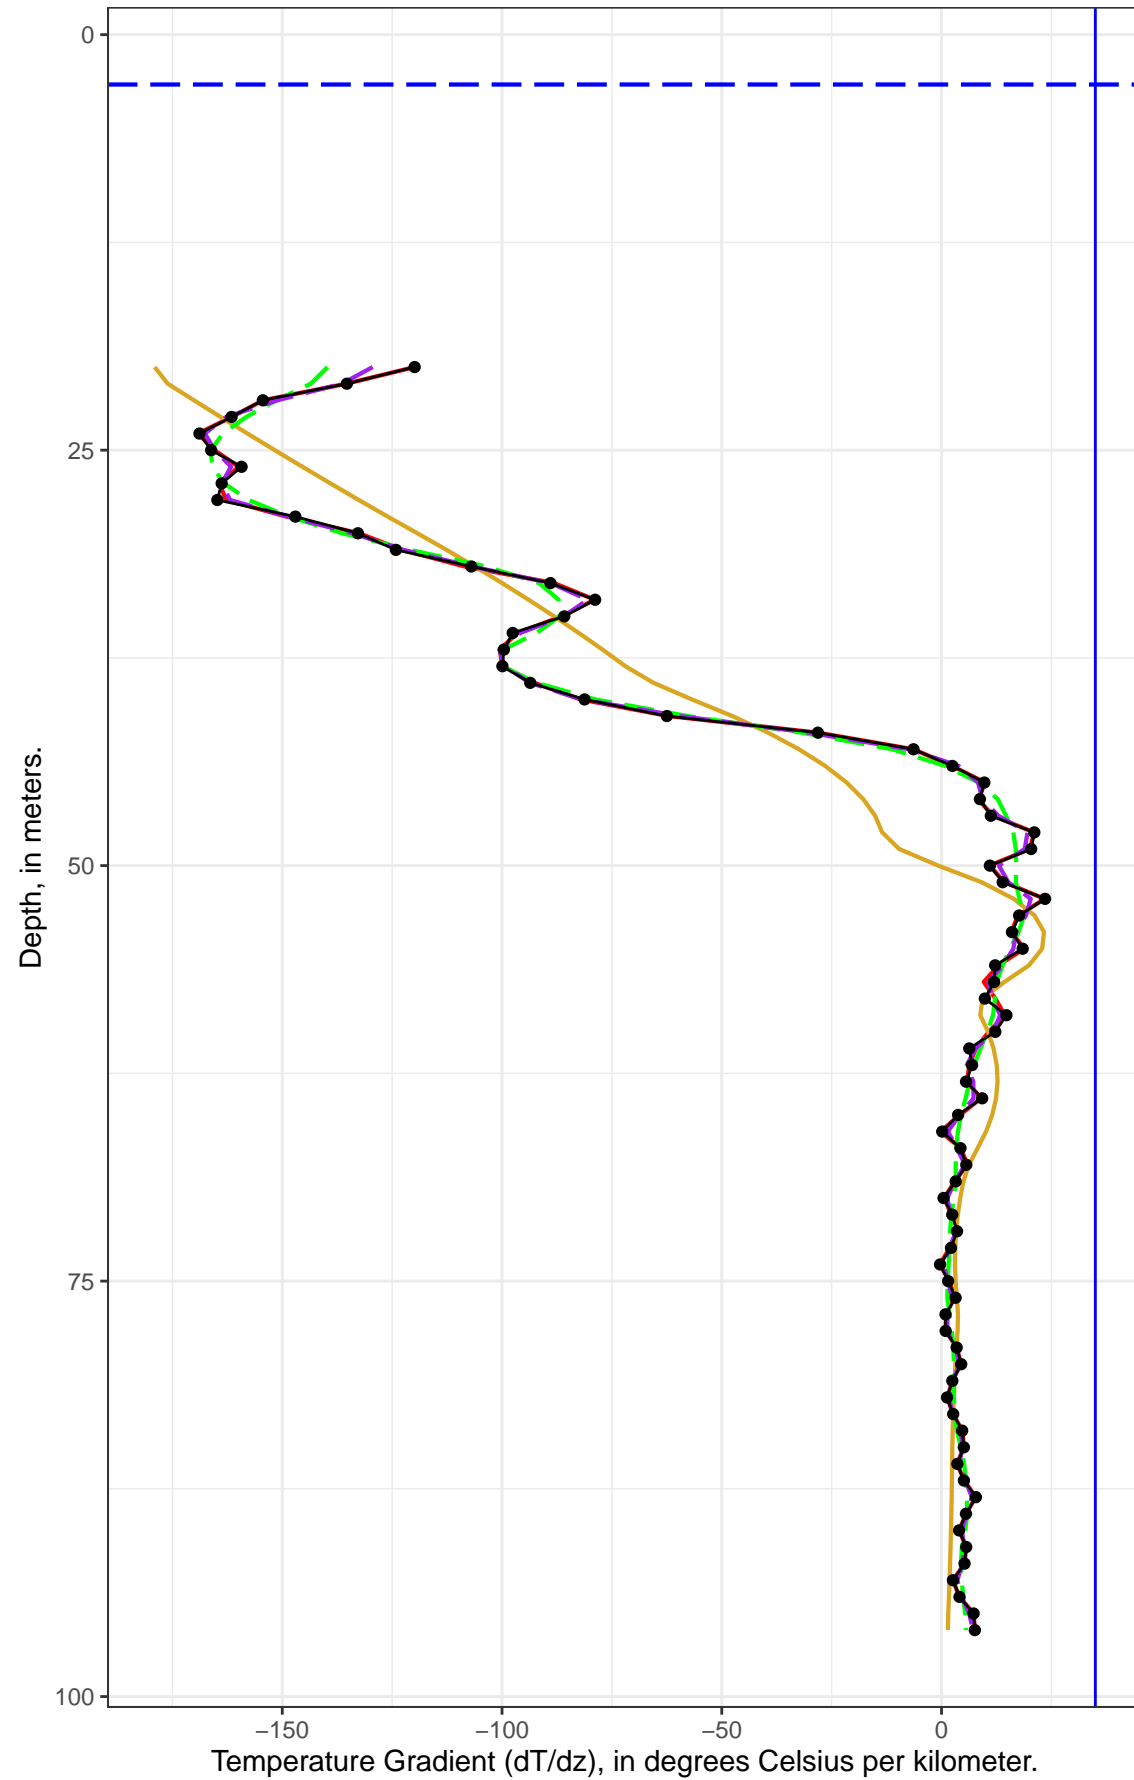

ID: 203 [M-2A] Second Derivative

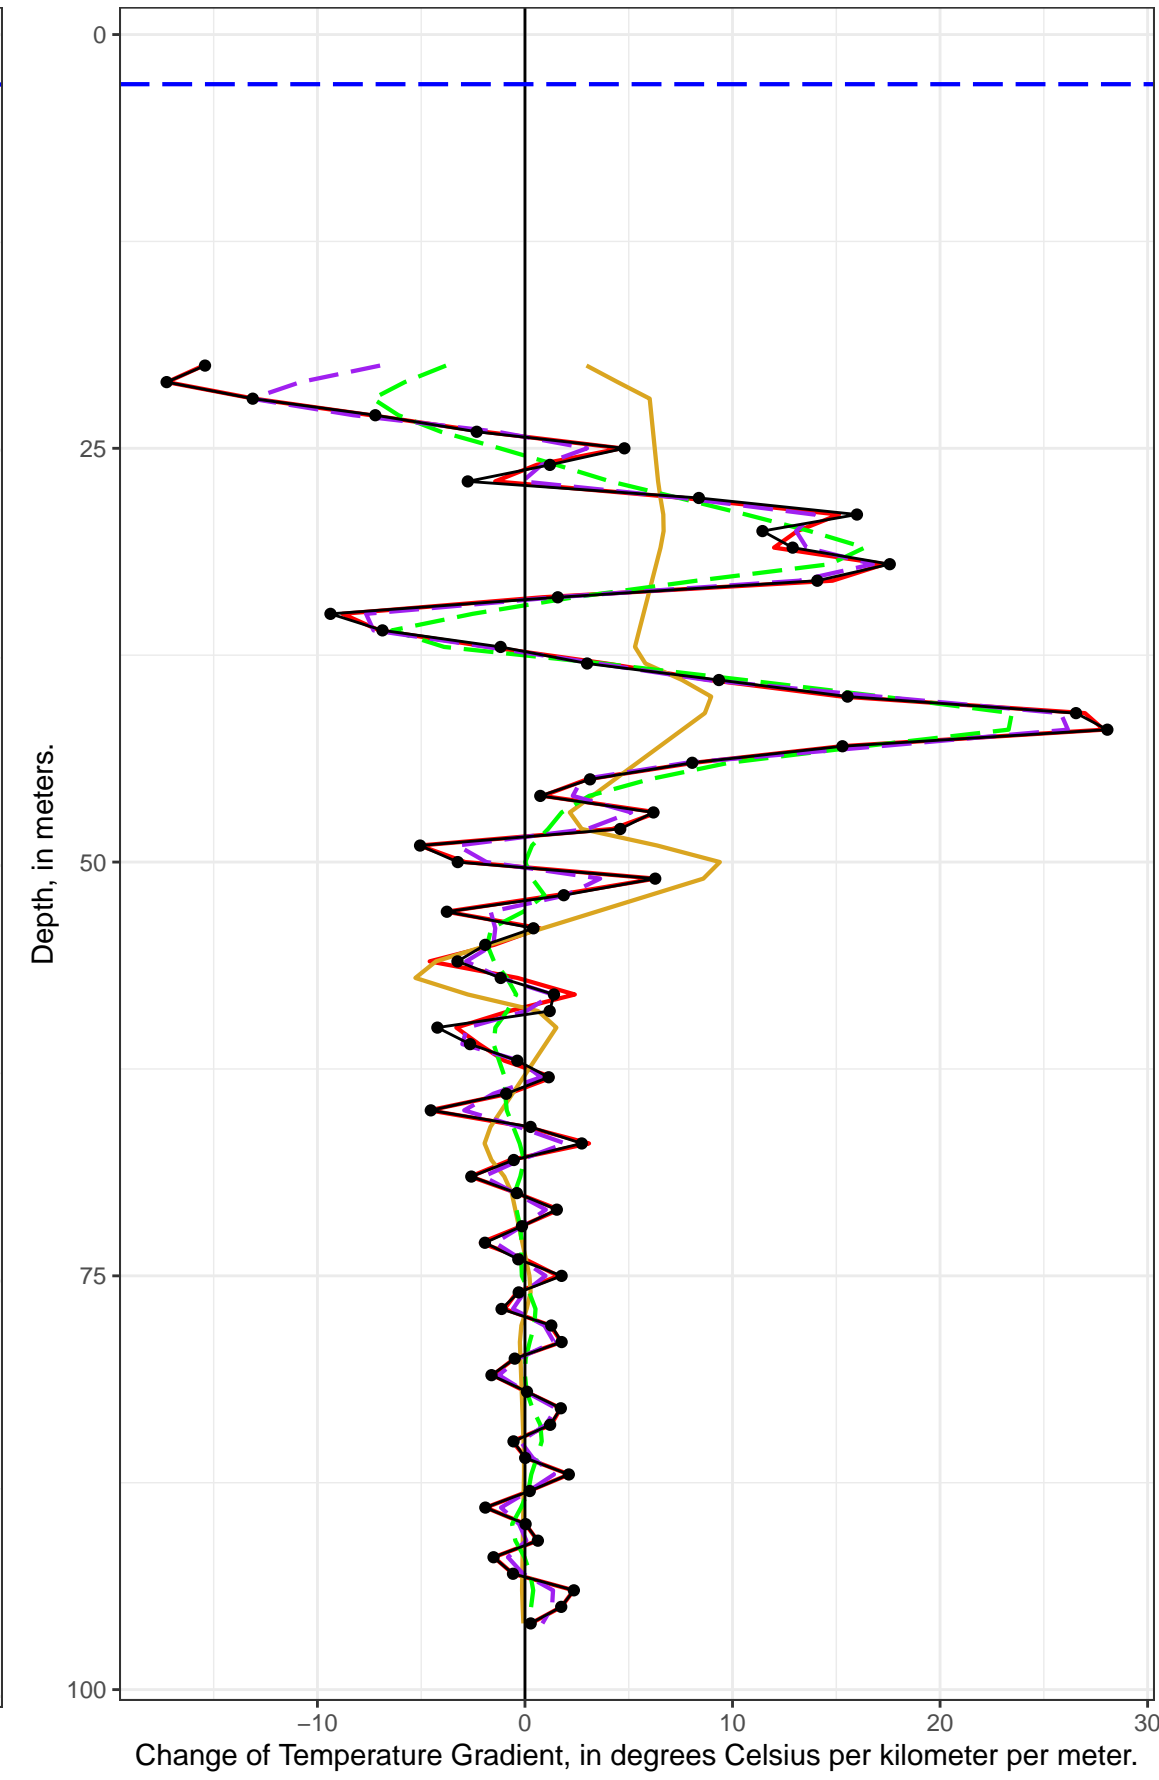

• Data • LOESS (AICC) • LOESS (constant) • LOESS (GCV) • Spline

• Data • LOESS (AICC) • LOESS (constant) • LOESS (GCV) • Spline

• Data • LOESS (AICC) • LOESS (constant) • LOESS (GCV) • Spline

ID: 205 [MSDL-TG-2] Smoothed Profile

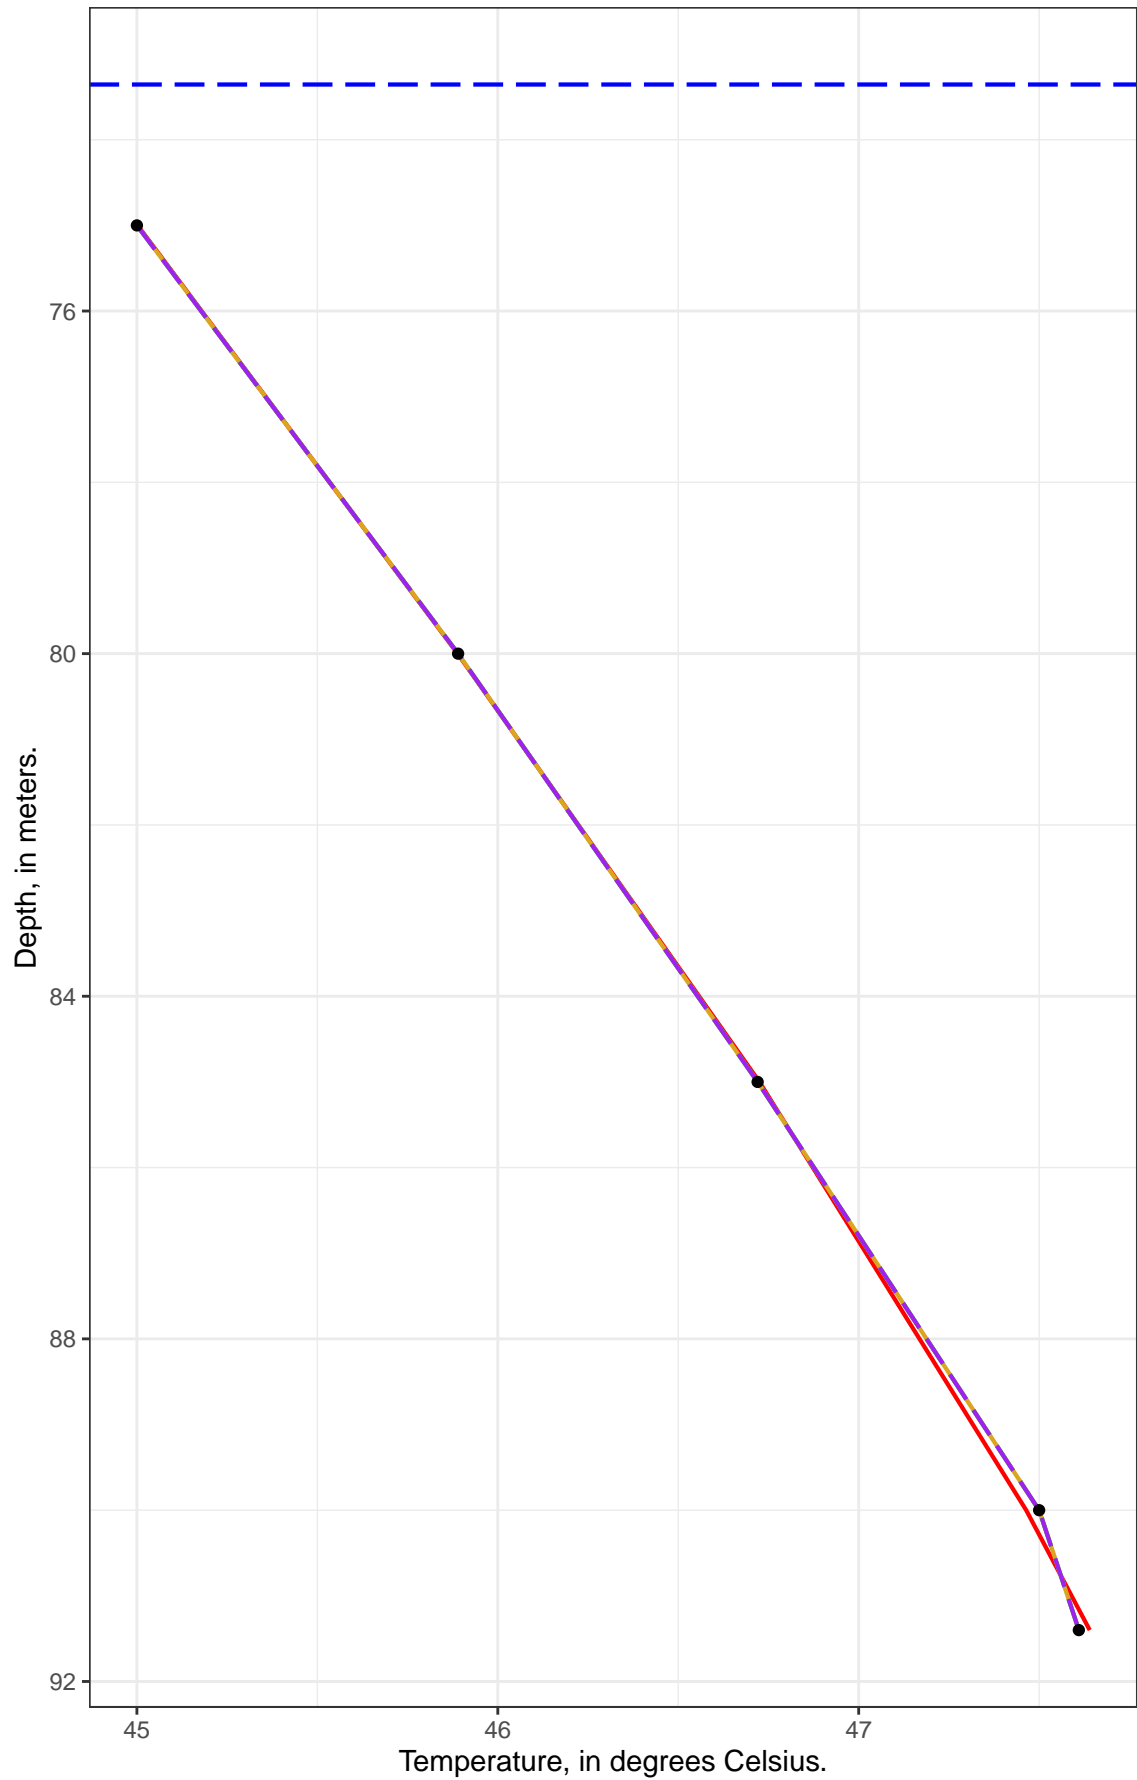

• Data — LOESS (AICC) — LOESS (constant) — LOESS (GCV) — Spline

ID: 205 [MSDL-TG-2] First Derivative

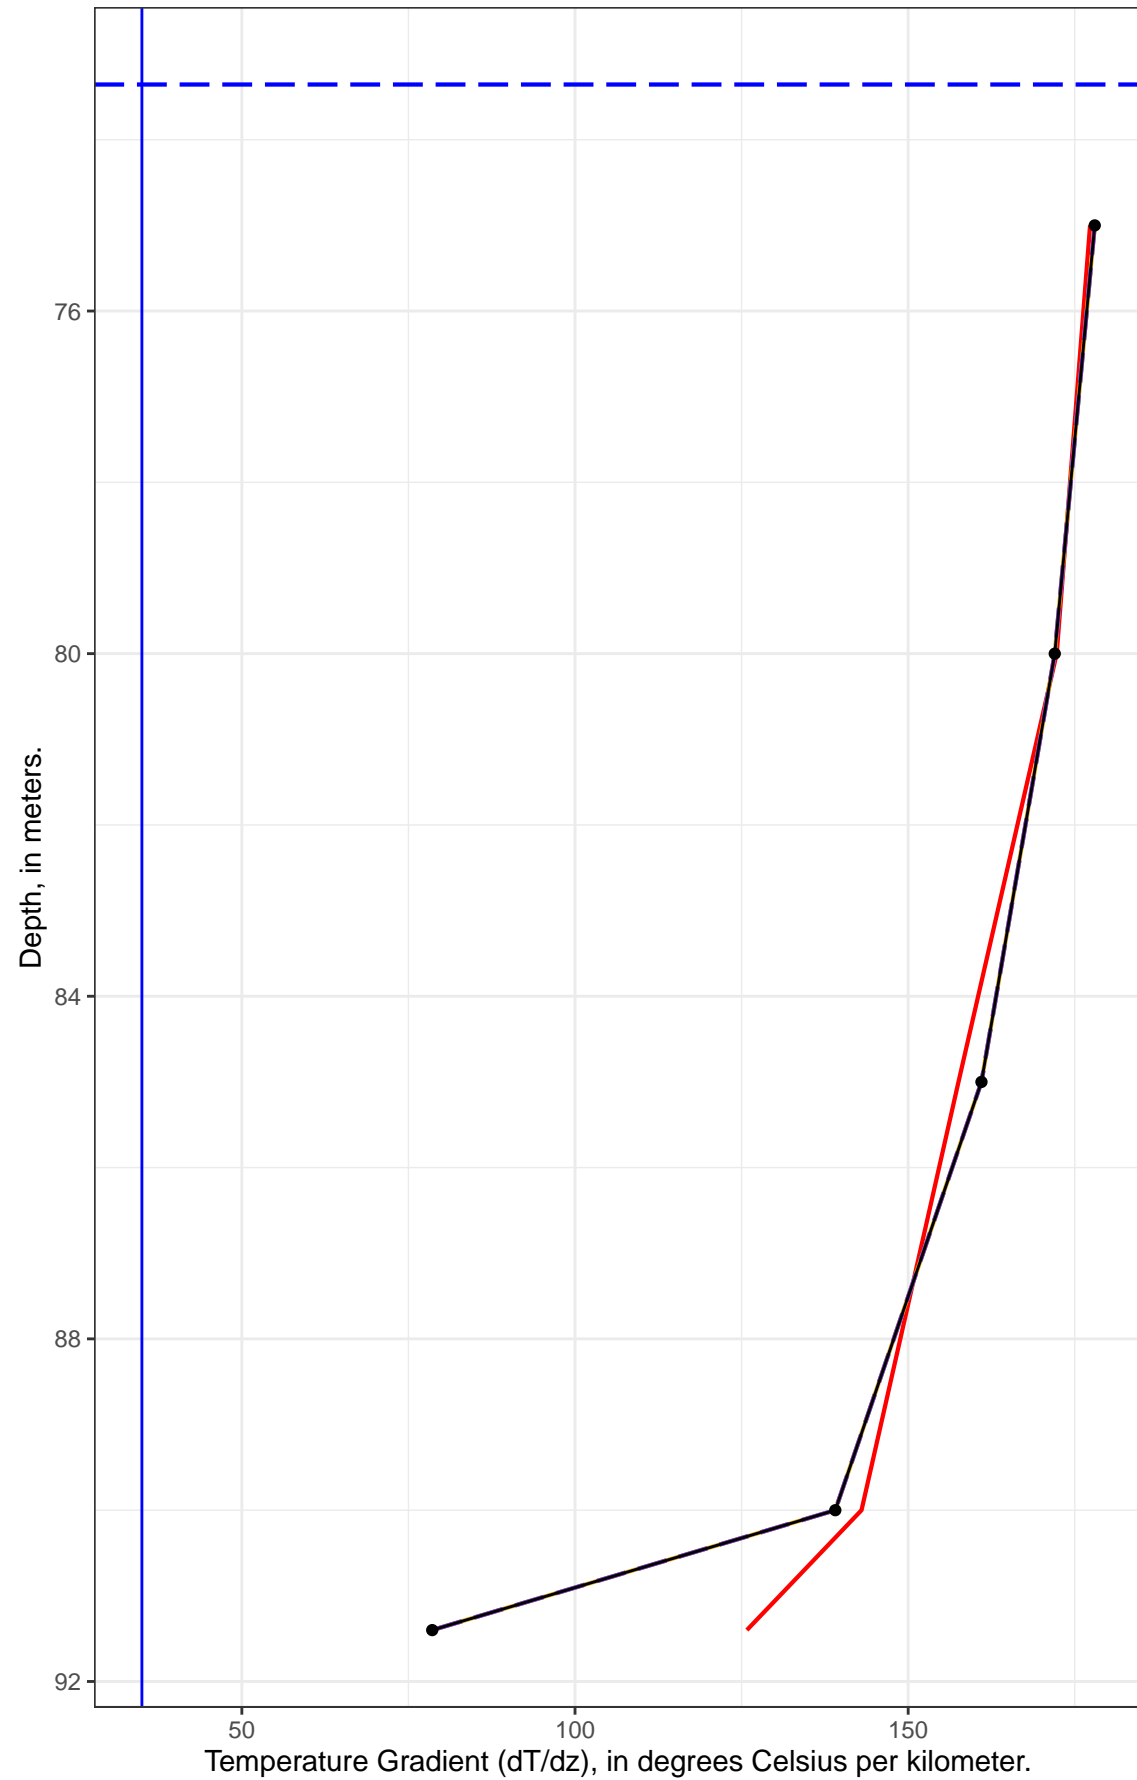

• Data — LOESS (AICC) — LOESS (constant) — LOESS (GCV) — Spline

ID: 205 [MSDL-TG-2] Second Derivative

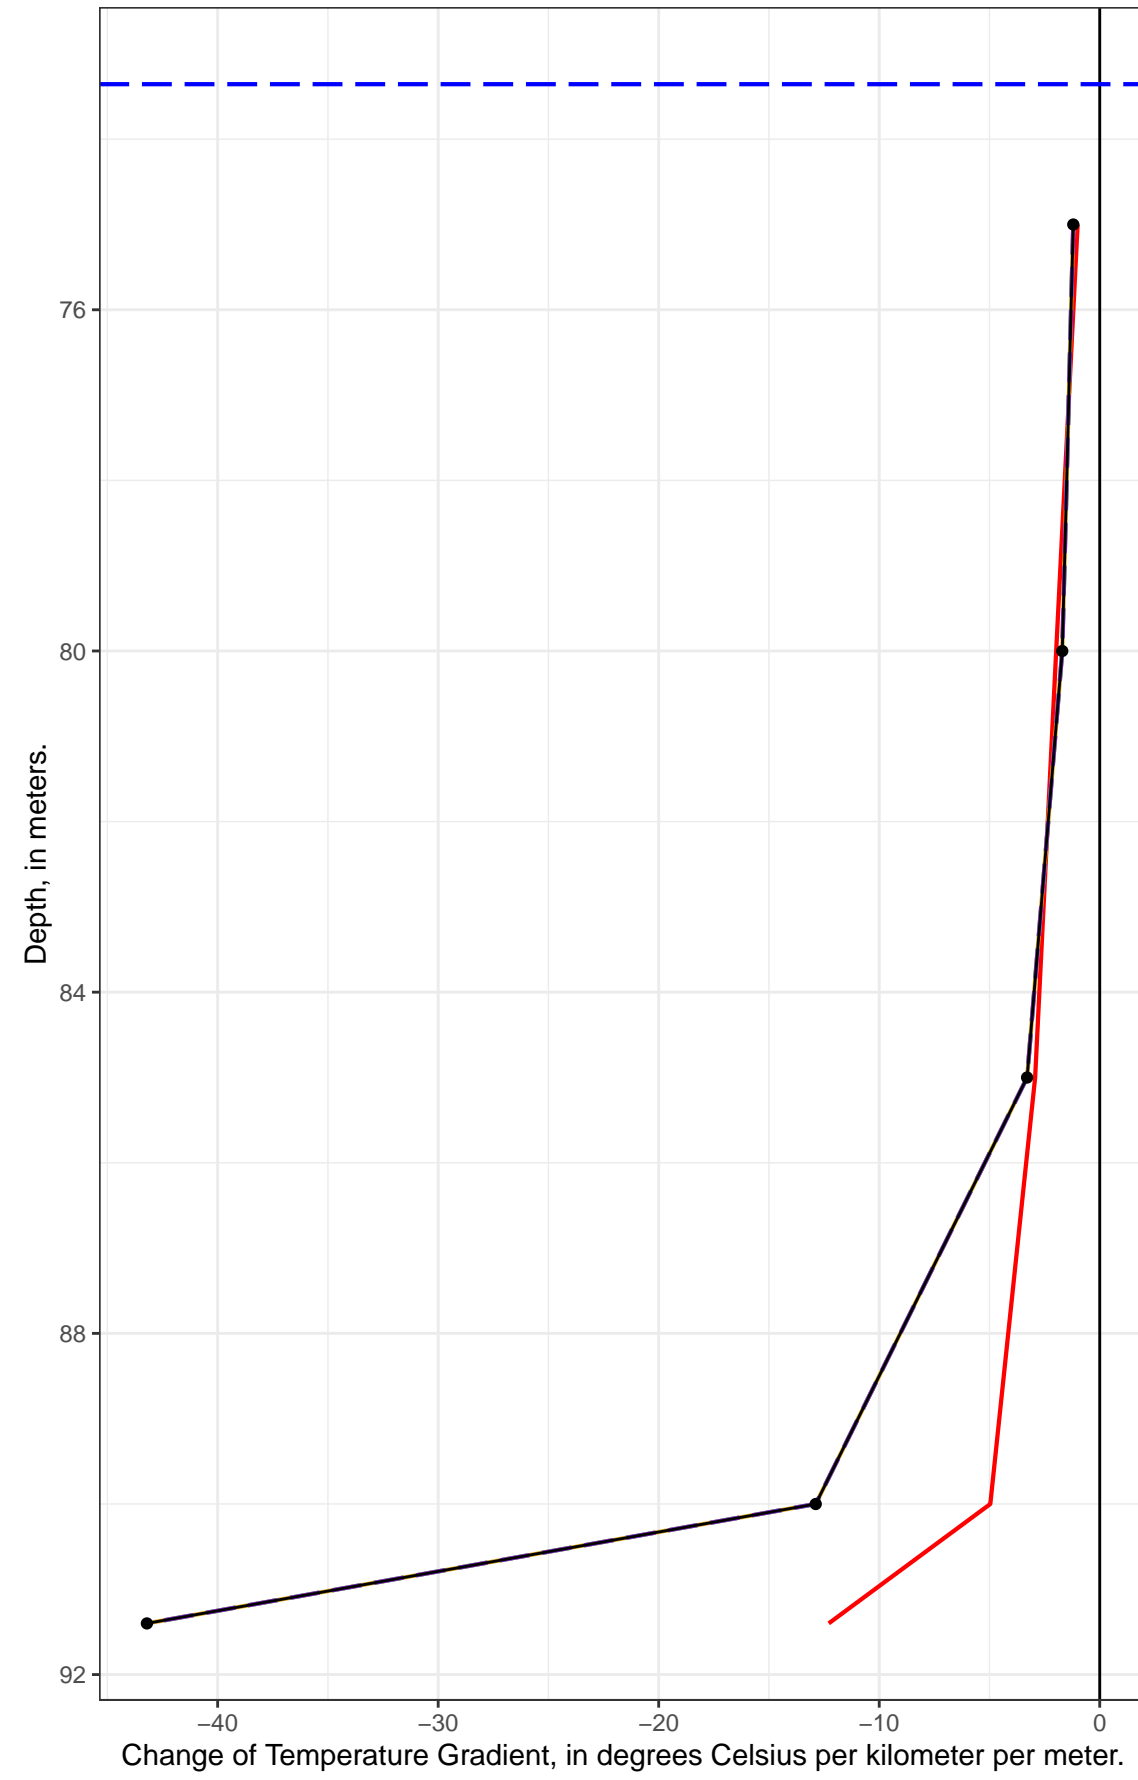

• Data — LOESS (AICC) — LOESS (constant) — LOESS (GCV) — Spline

ID: 206 [NASA-WSTF\_BLM-2-630] Smoothed Profile

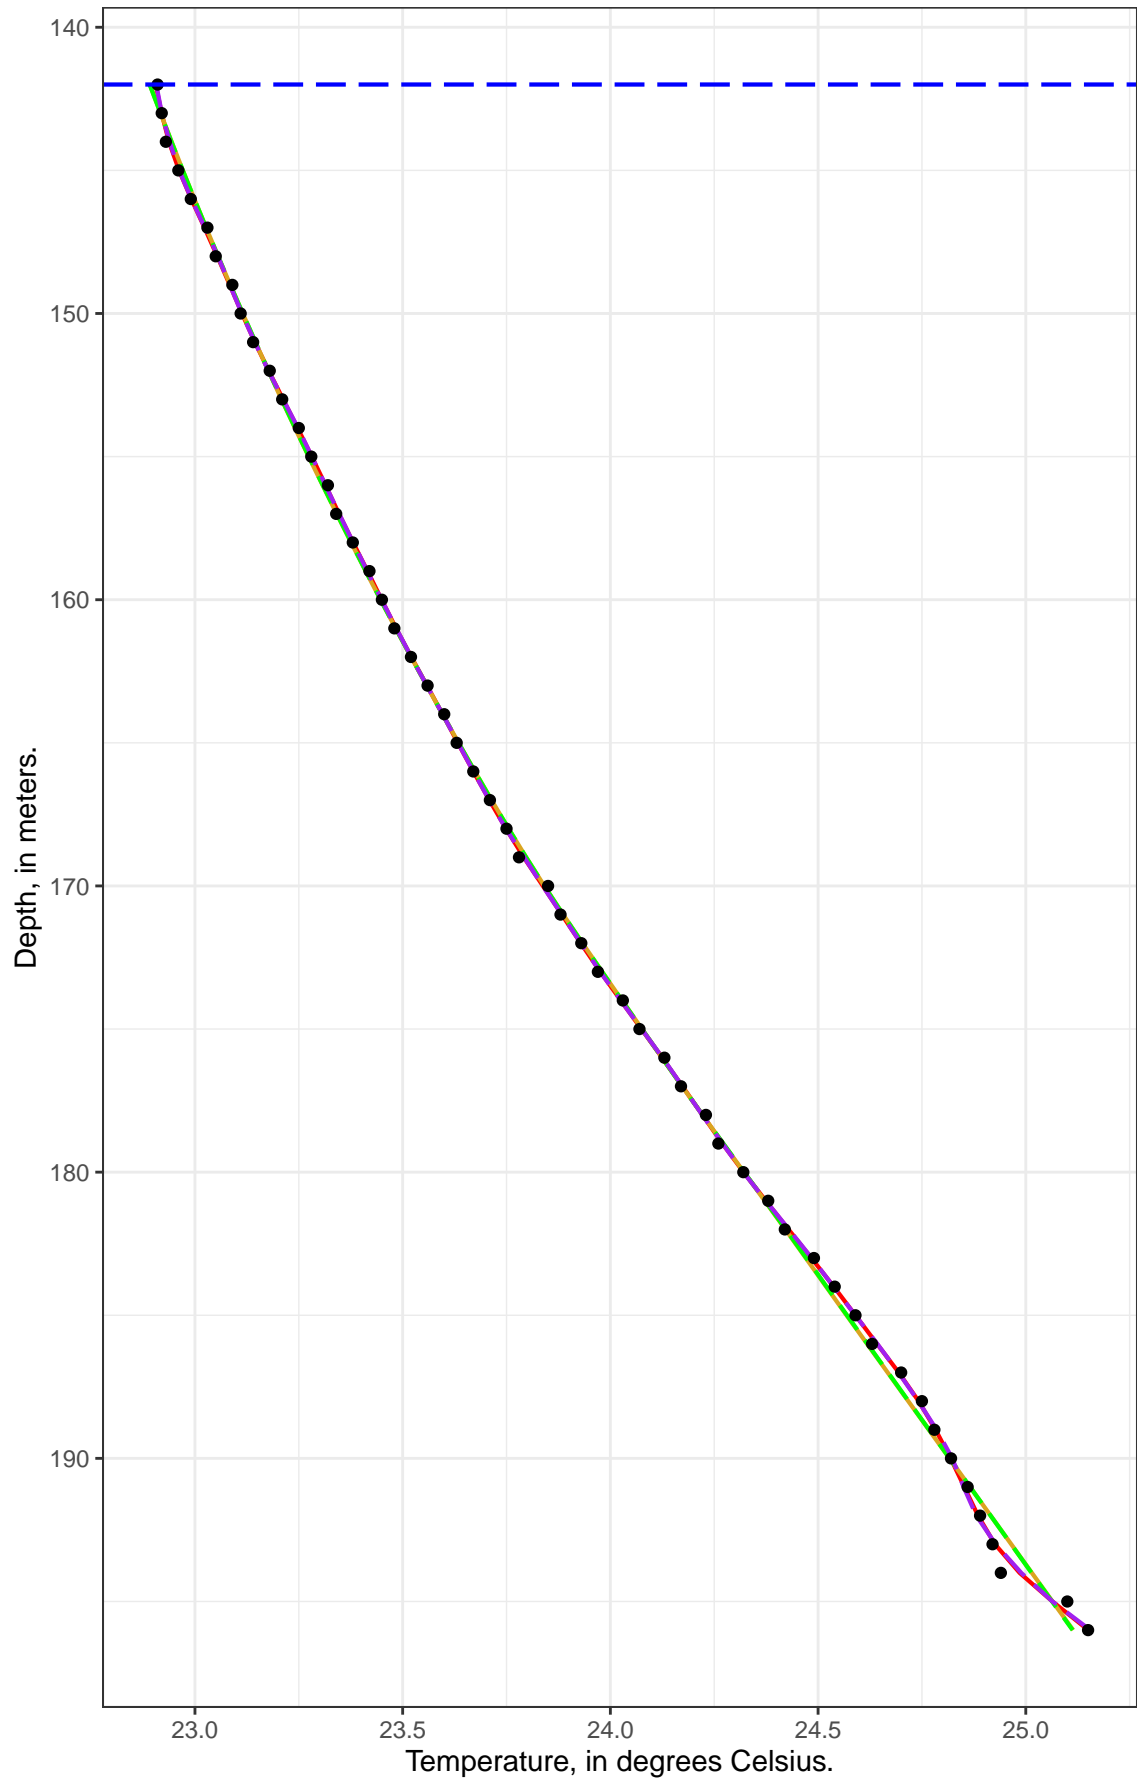

ID: 206 [NASA-WSTF\_BLM-2-630] First Derivative

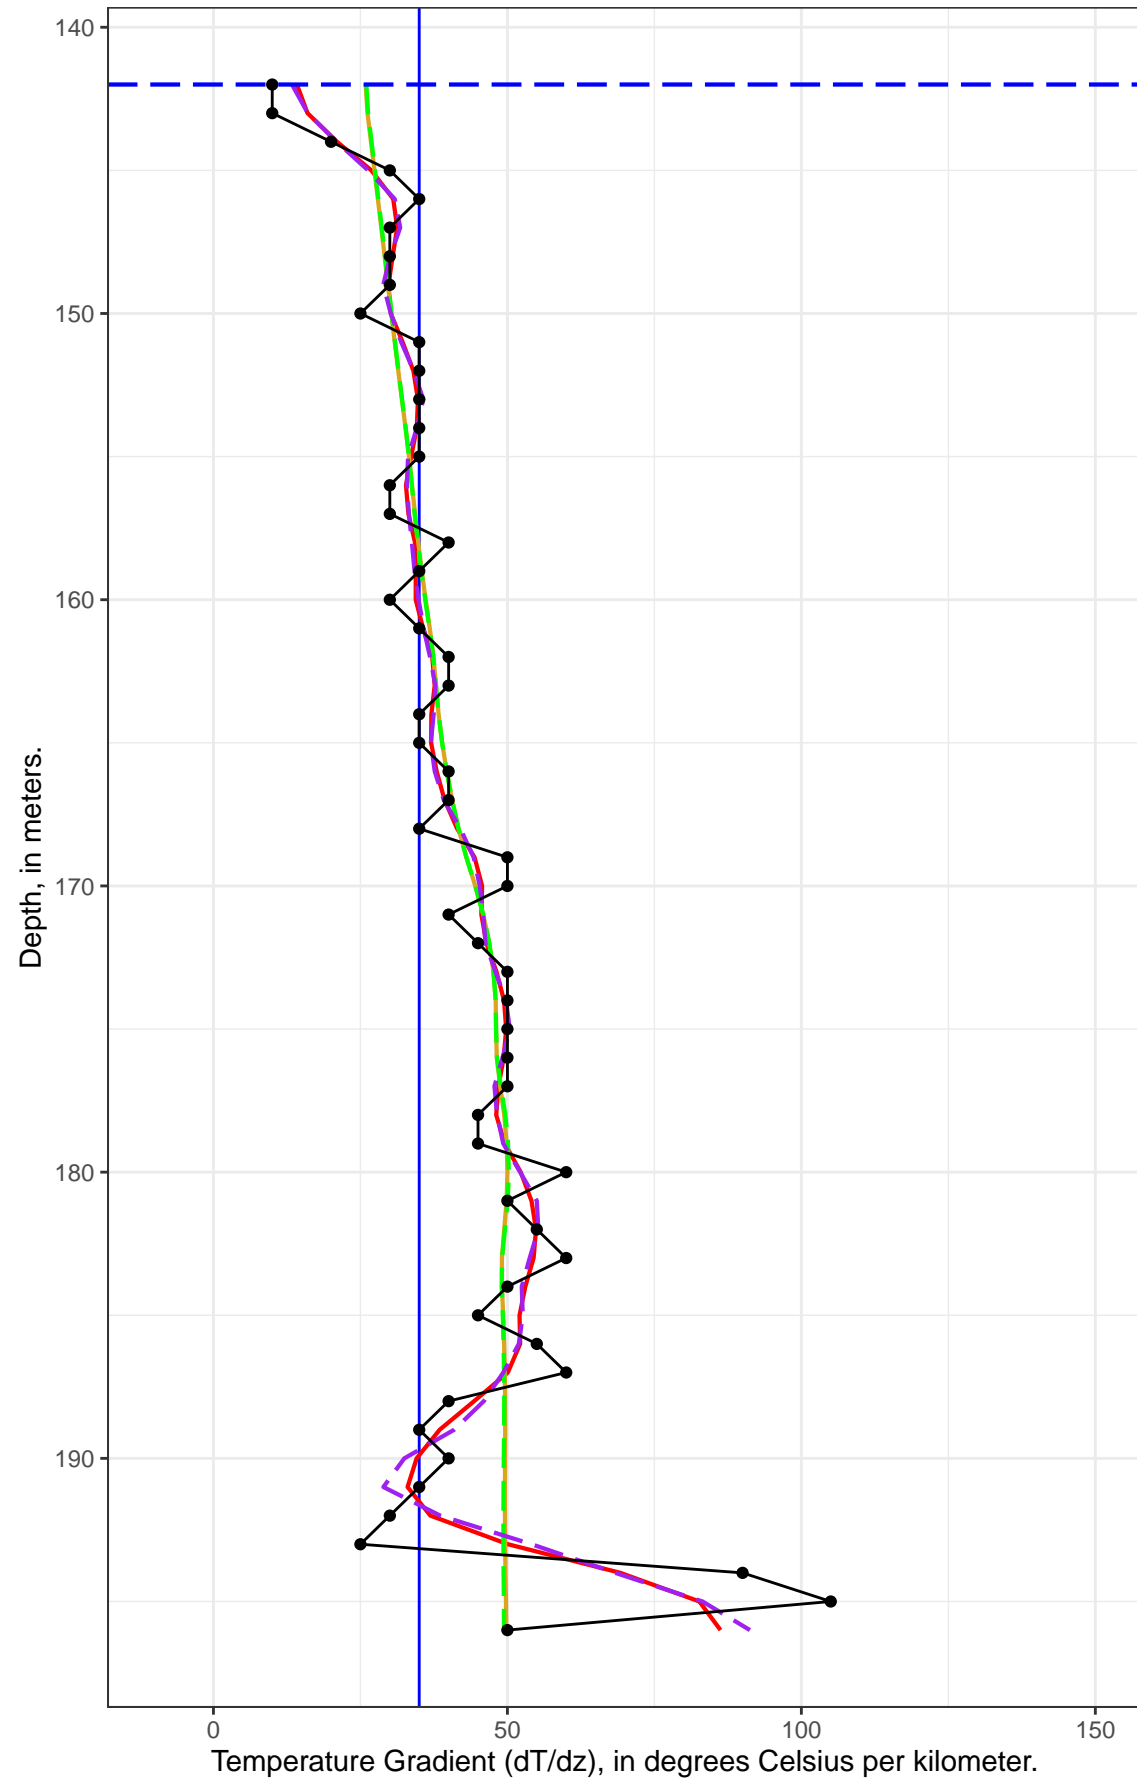

ID: 206 [NASA-WSTF\_BLM-2-630] Second Derivative

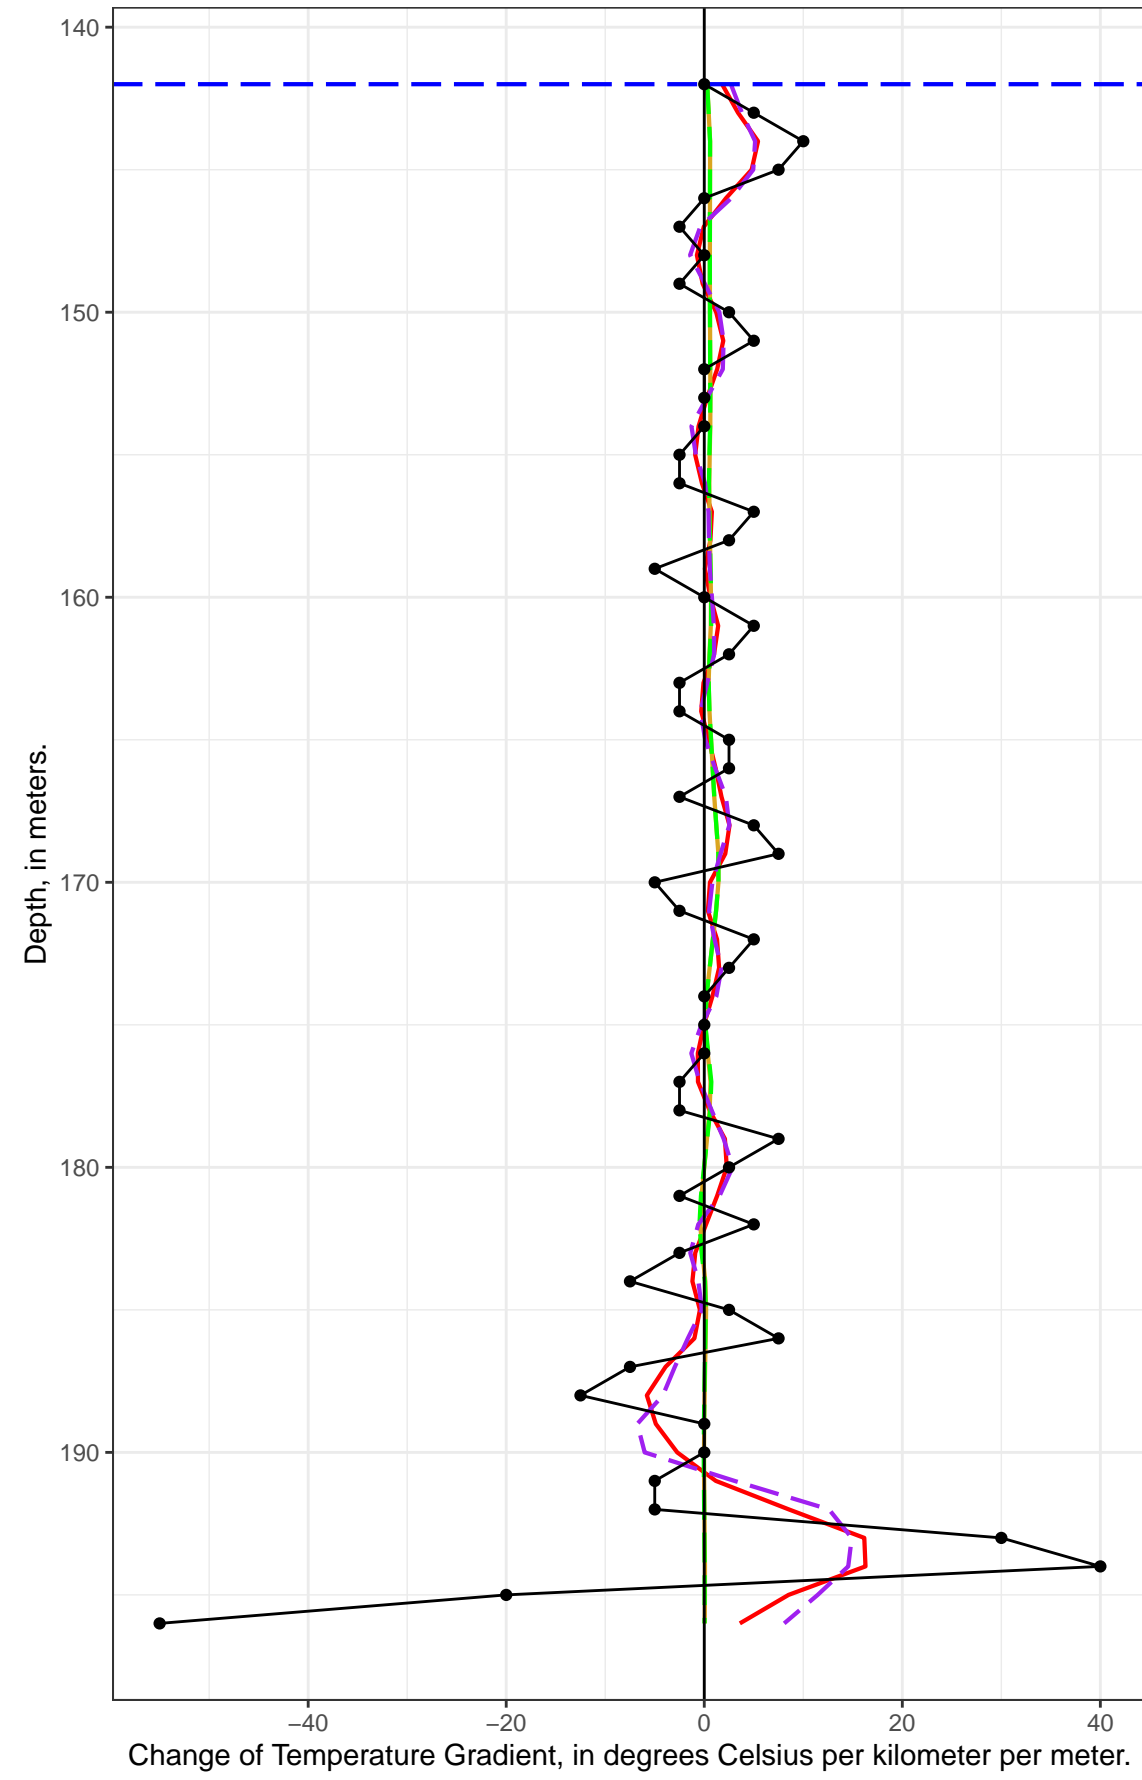

• Data • LOESS (AICC) • LOESS (constant) • LOESS (GCV) • Spline

• Data • LOESS (AICC) • LOESS (constant) • LOESS (GCV) • Spline

• Data • LOESS (AICC) • LOESS (constant) • LOESS (GCV) • Spline

ID: 209 [NASA\_WSTF\_BLM-17-493] Smoothed Profile

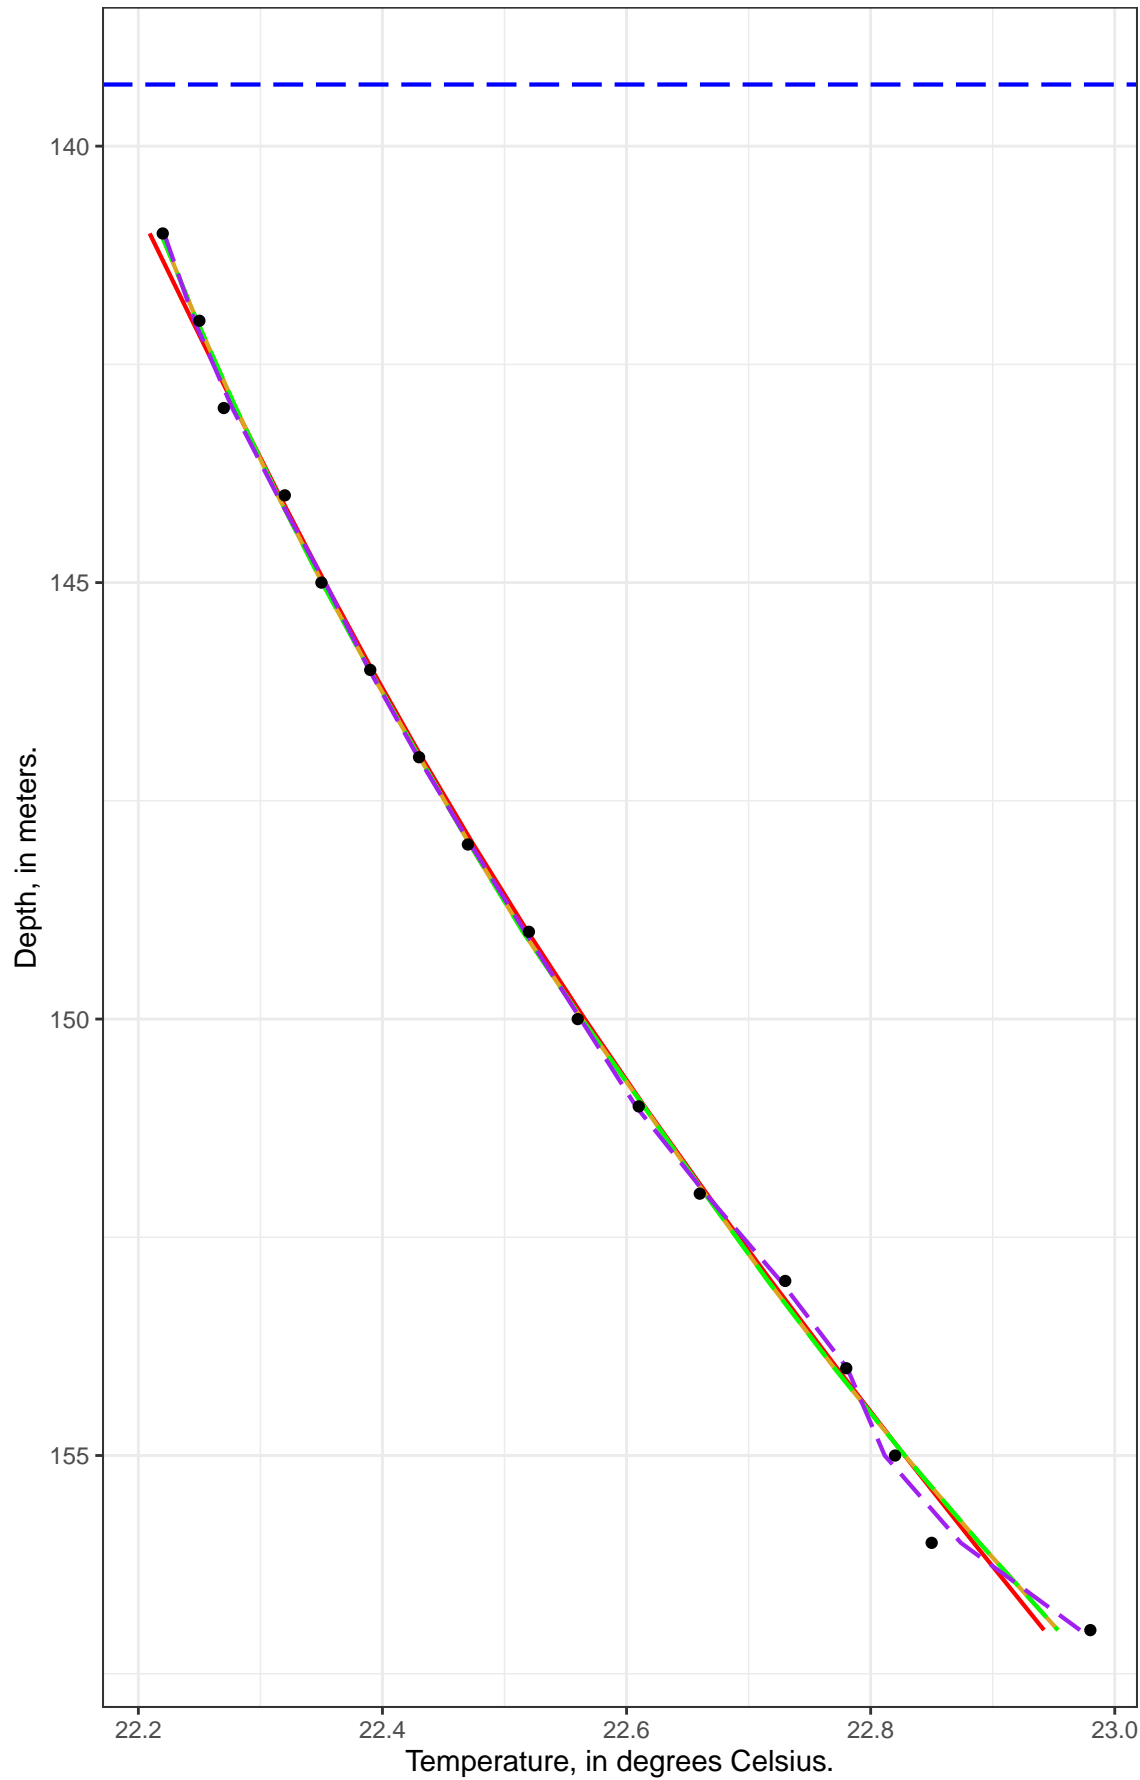

ID: 209 [NASA\_WSTF\_BLM-17-493] First Derivative

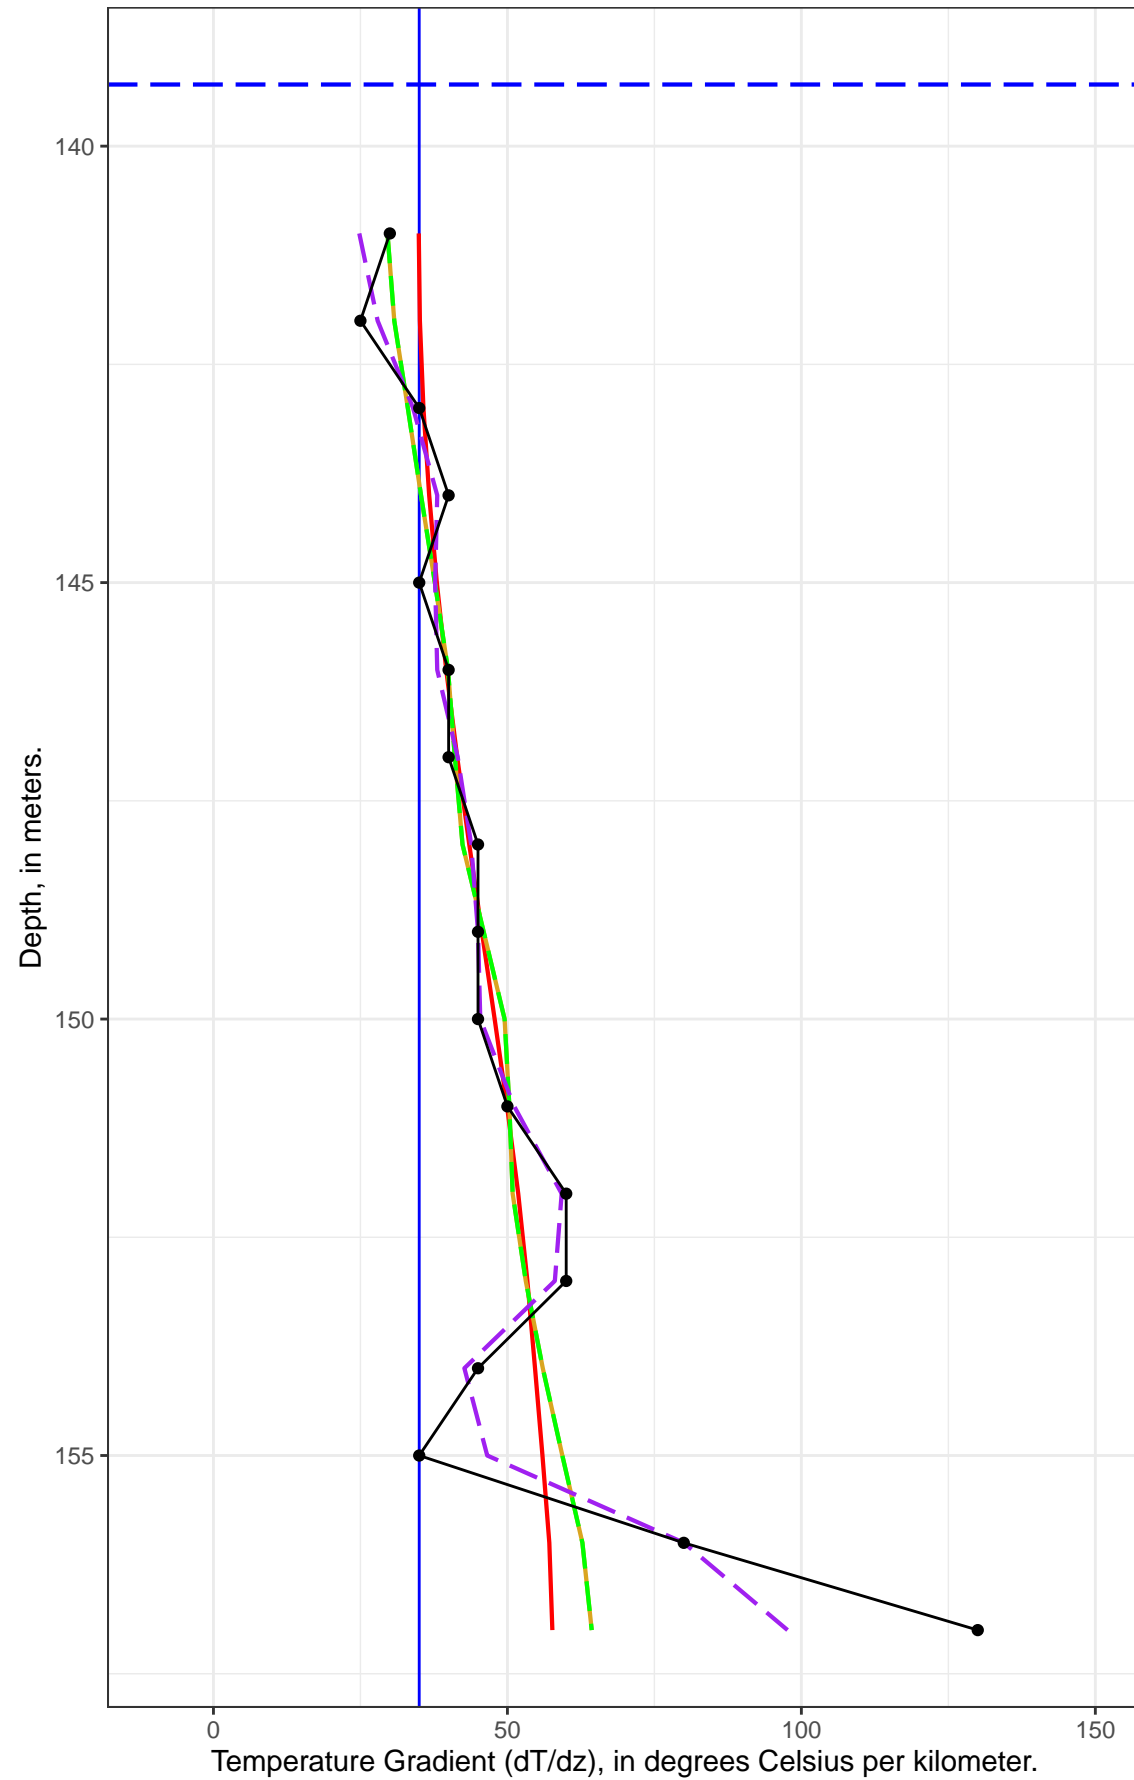

ID: 209 [NASA\_WSTF\_BLM-17-493] Second Derivative

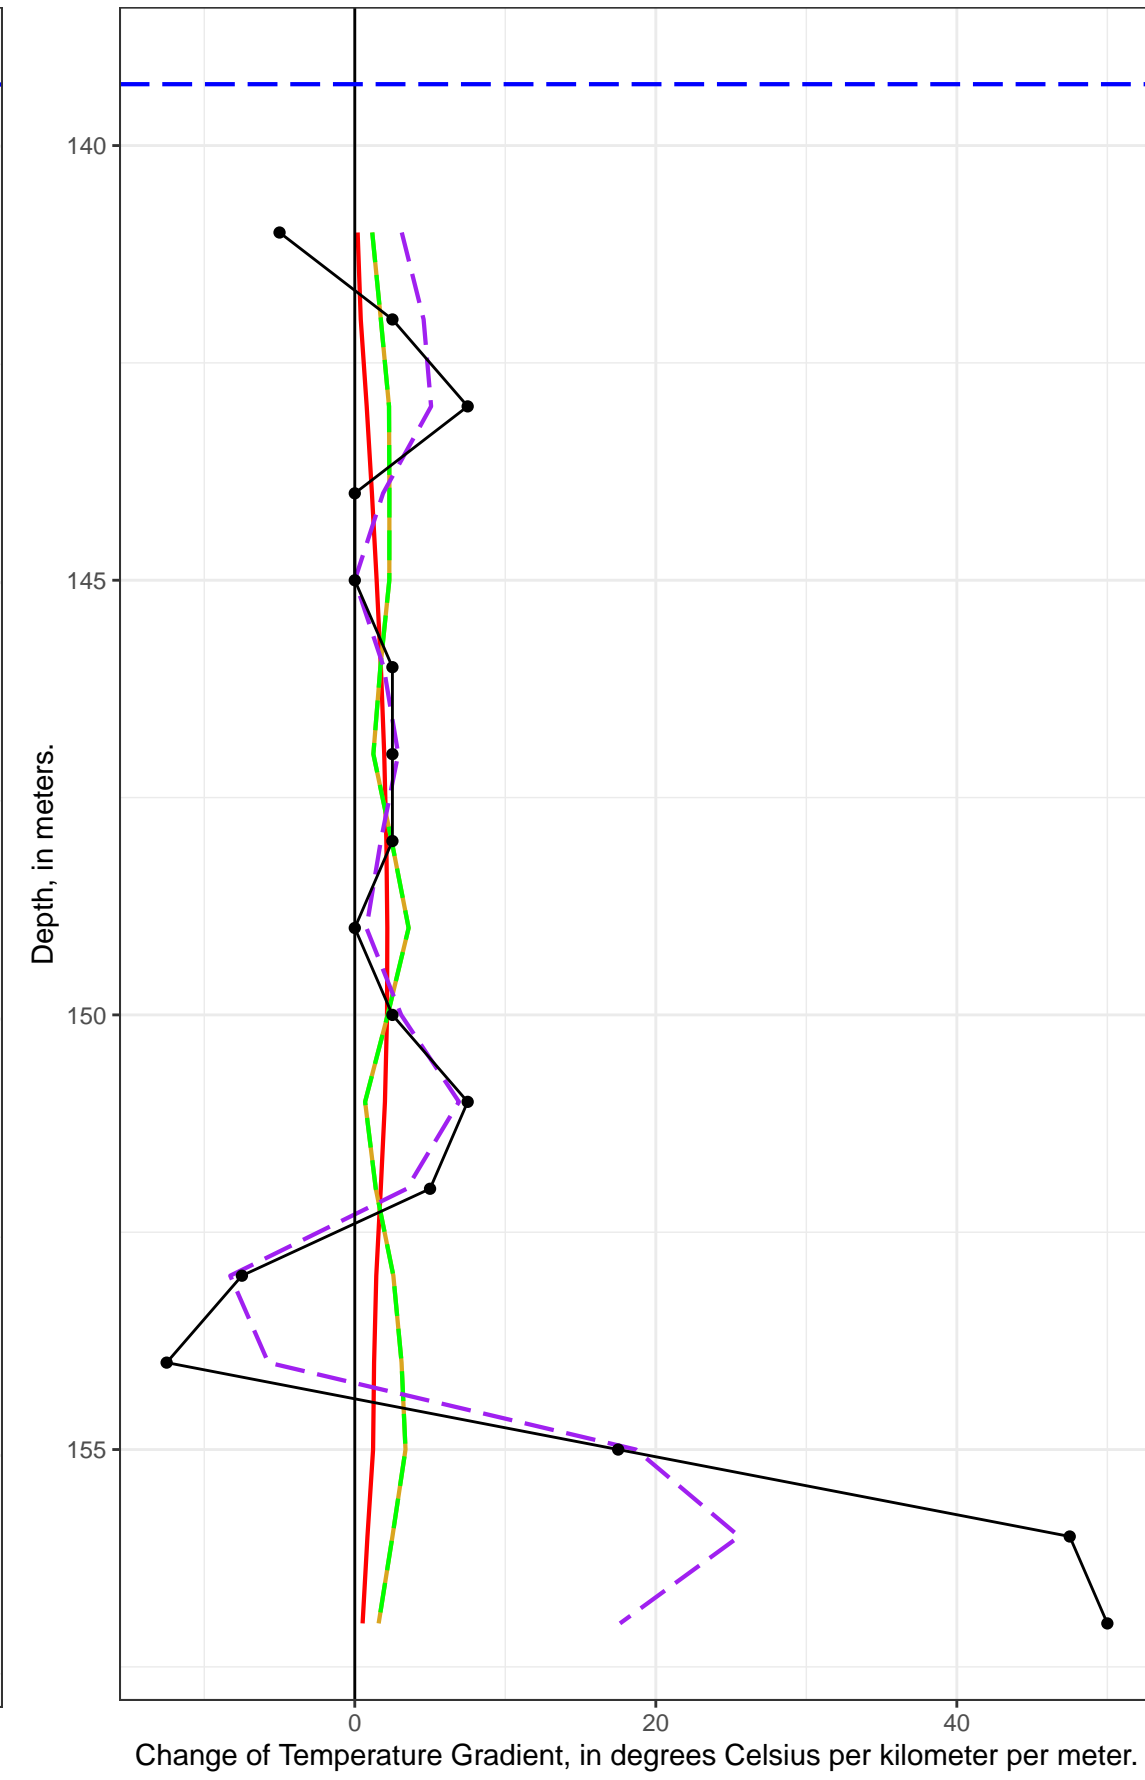

• Data — LOESS (AICC) — LOESS (constant) — LOESS (GCV) — Spline

• Data — LOESS (AICC) — LOESS (constant) — LOESS (GCV) — Spline

• Data — LOESS (AICC) — LOESS (constant) — LOESS (GCV) — Spline



ID: 210 [NASA\_WSTF\_BLM-JPZ-2] Smoothed Profile

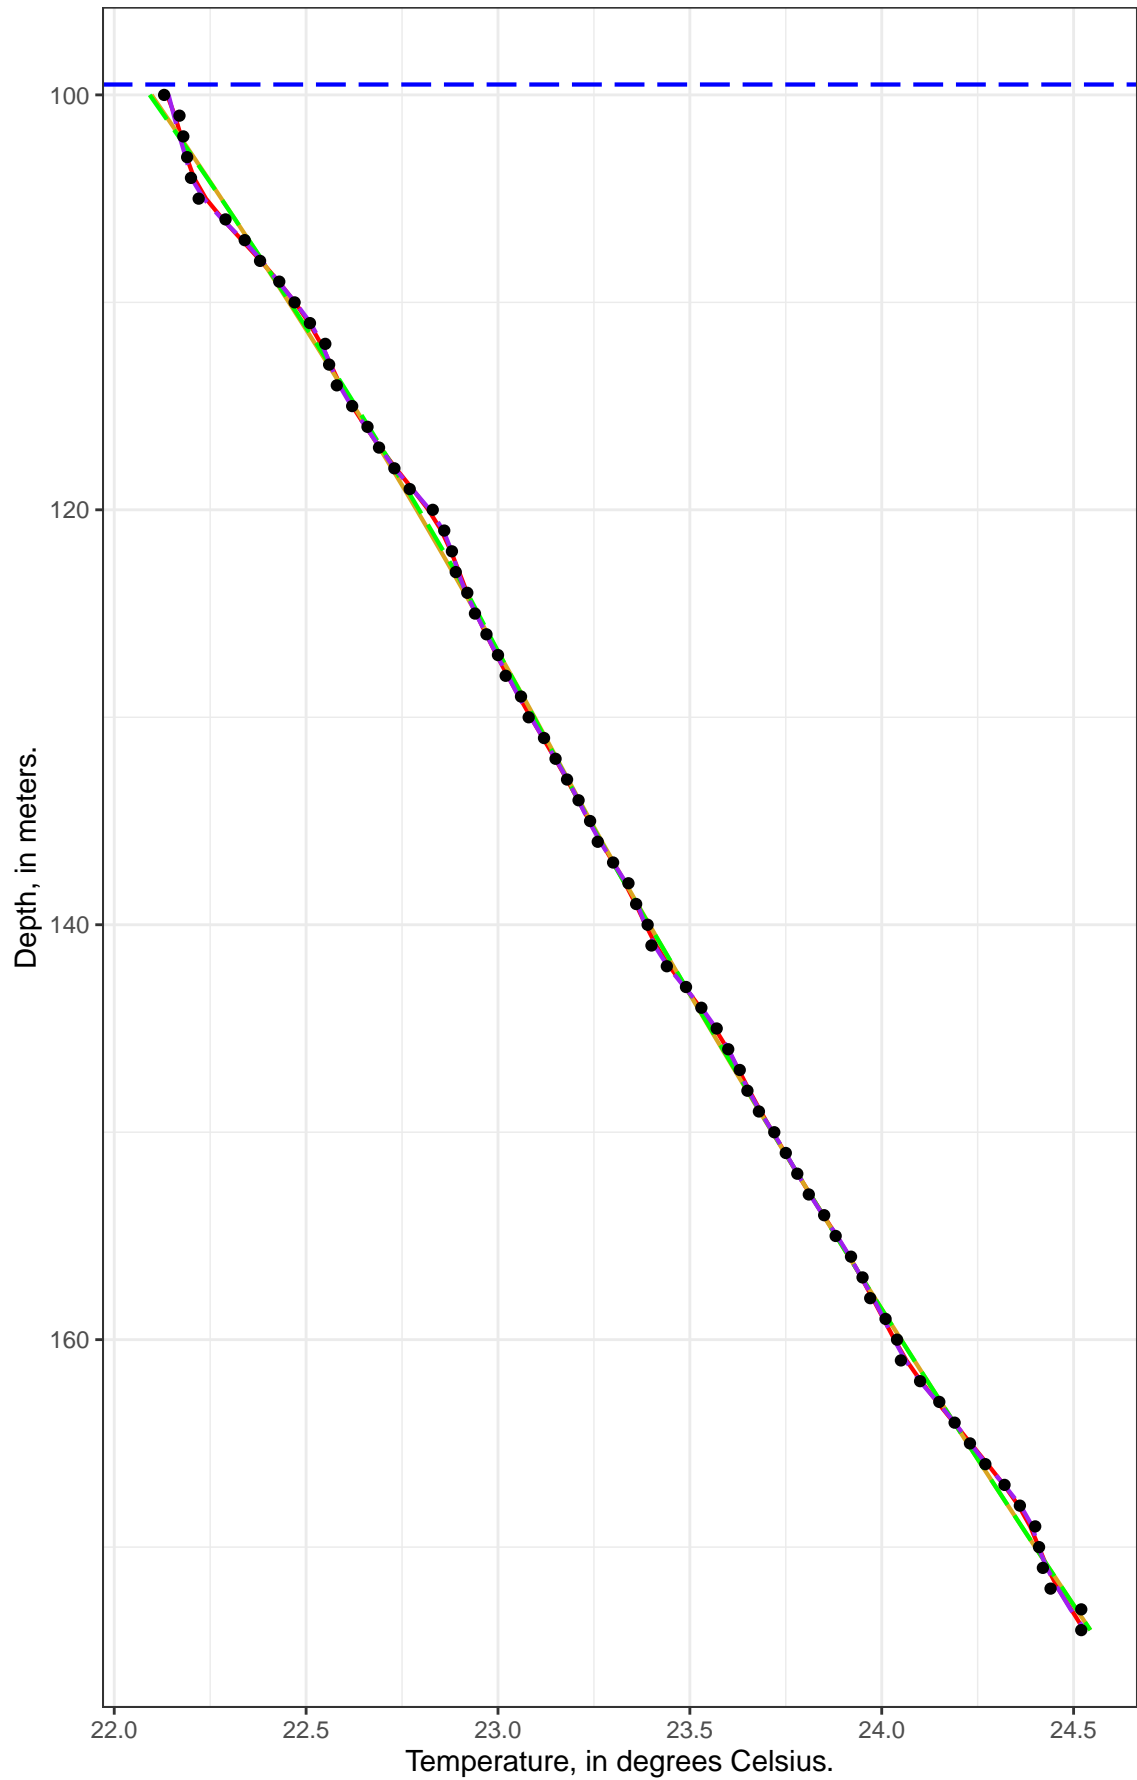

ID: 210 [NASA\_WSTF\_BLM-JPZ-2] First Derivative

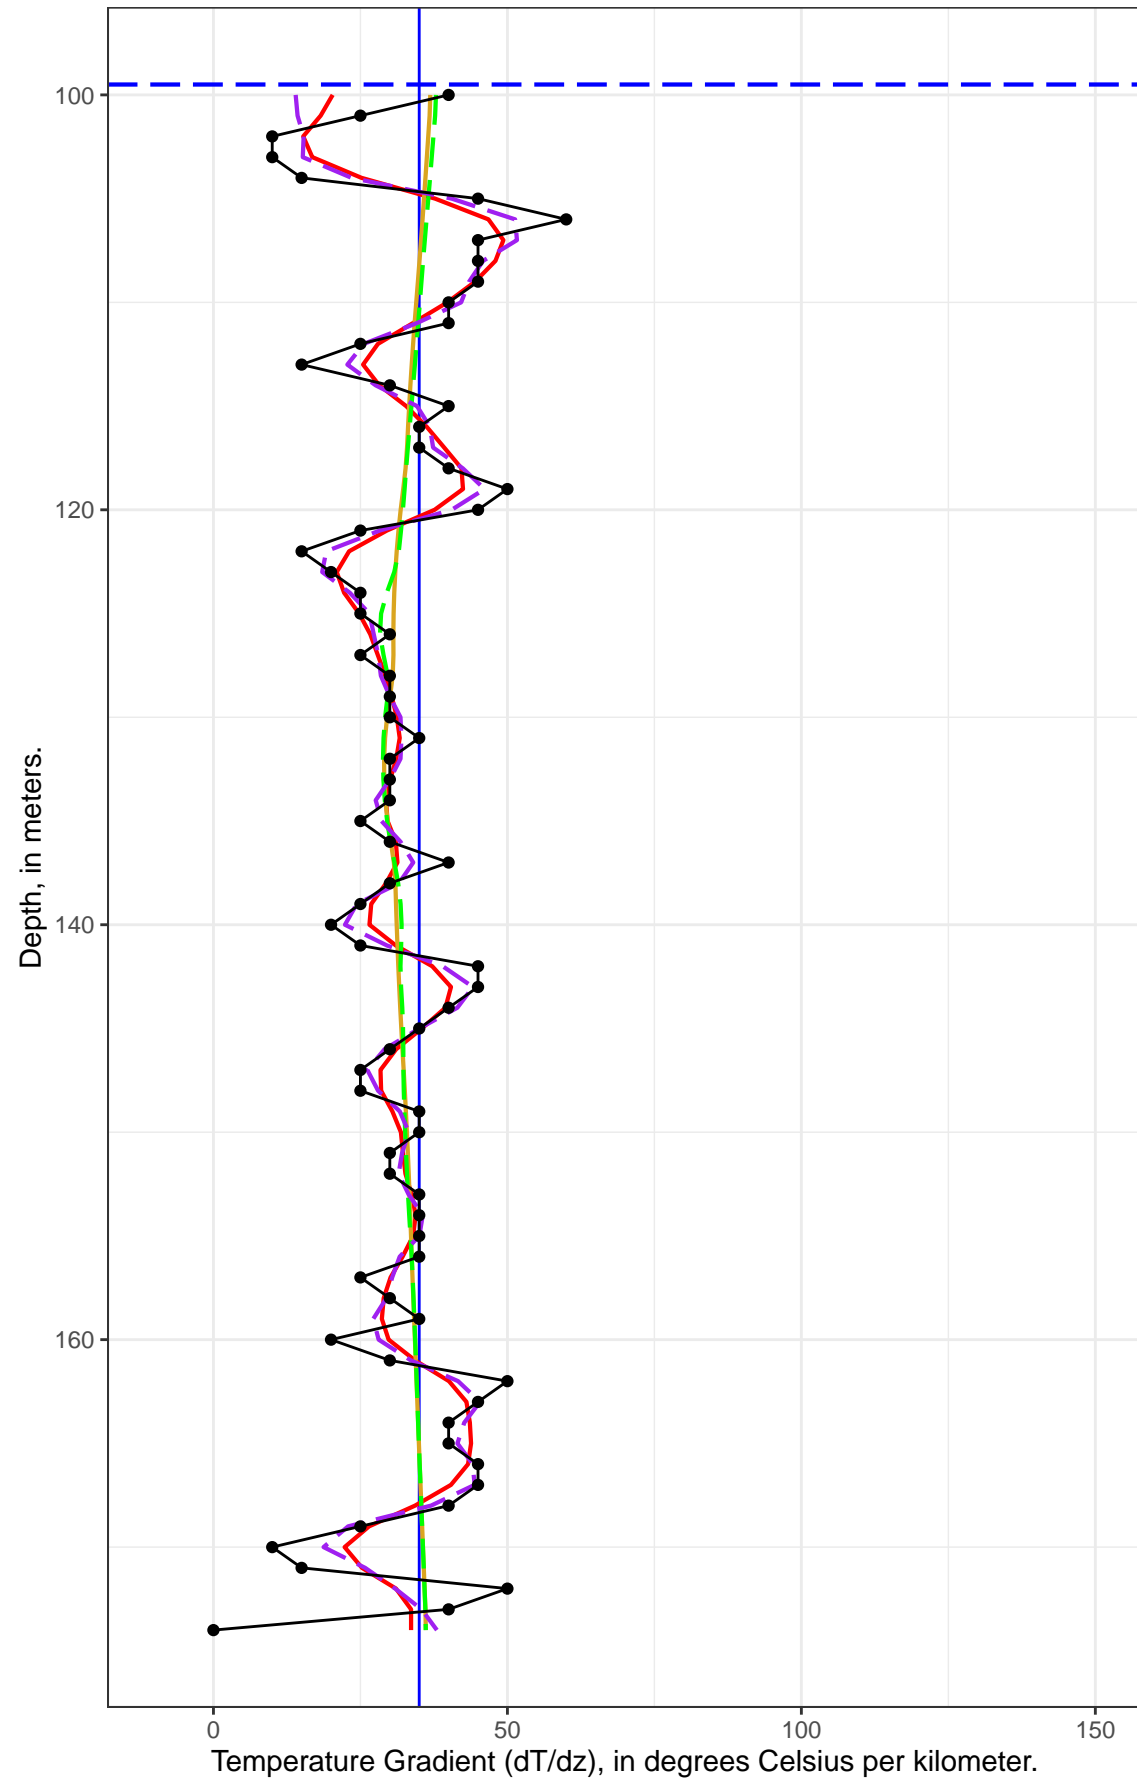

ID: 210 [NASA\_WSTF\_BLM-JPZ-2] Second Derivative

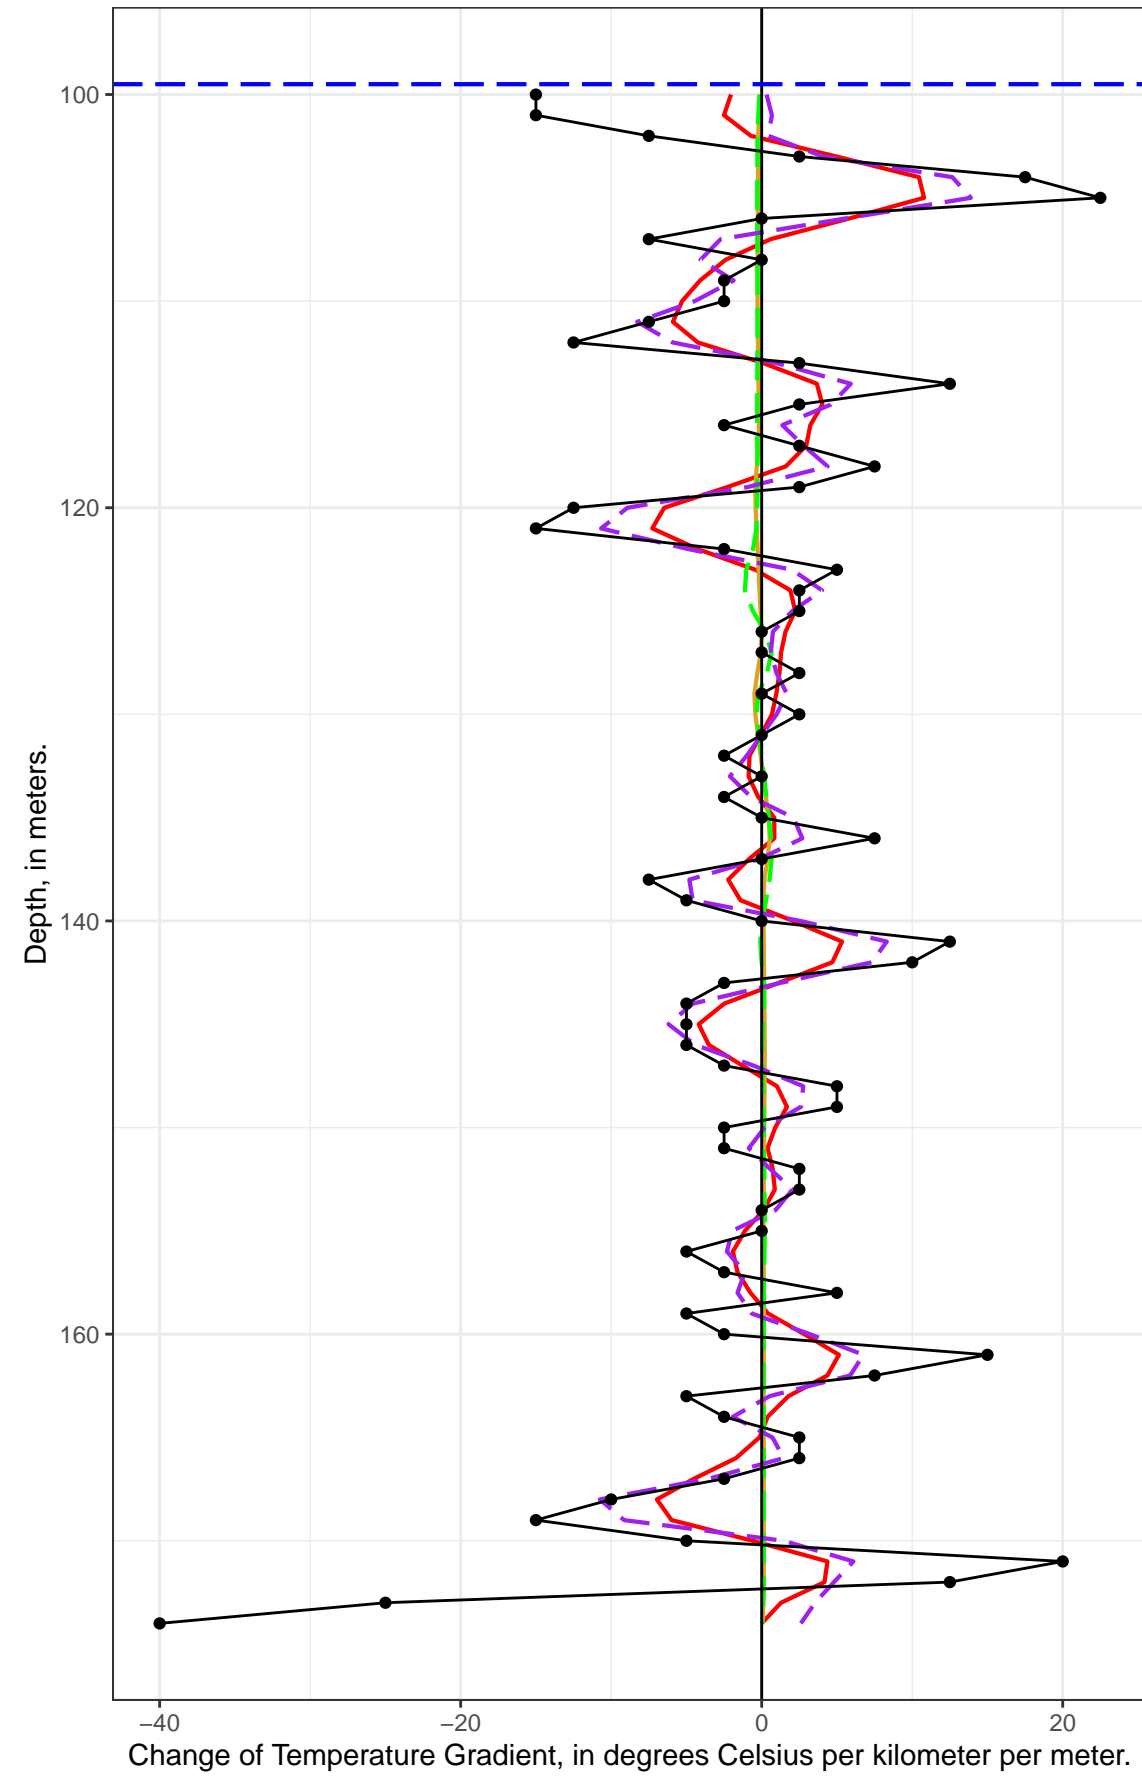

• Data — LOESS (AICC) — LOESS (constant) — LOESS (GCV) — Spline

• Data — LOESS (AICC) — LOESS (constant) — LOESS (GCV) — Spline

• Data — LOESS (AICC) — LOESS (constant) — LOESS (GCV) — Spline

ID: 211 [NMSU-OW-1] Smoothed Profile

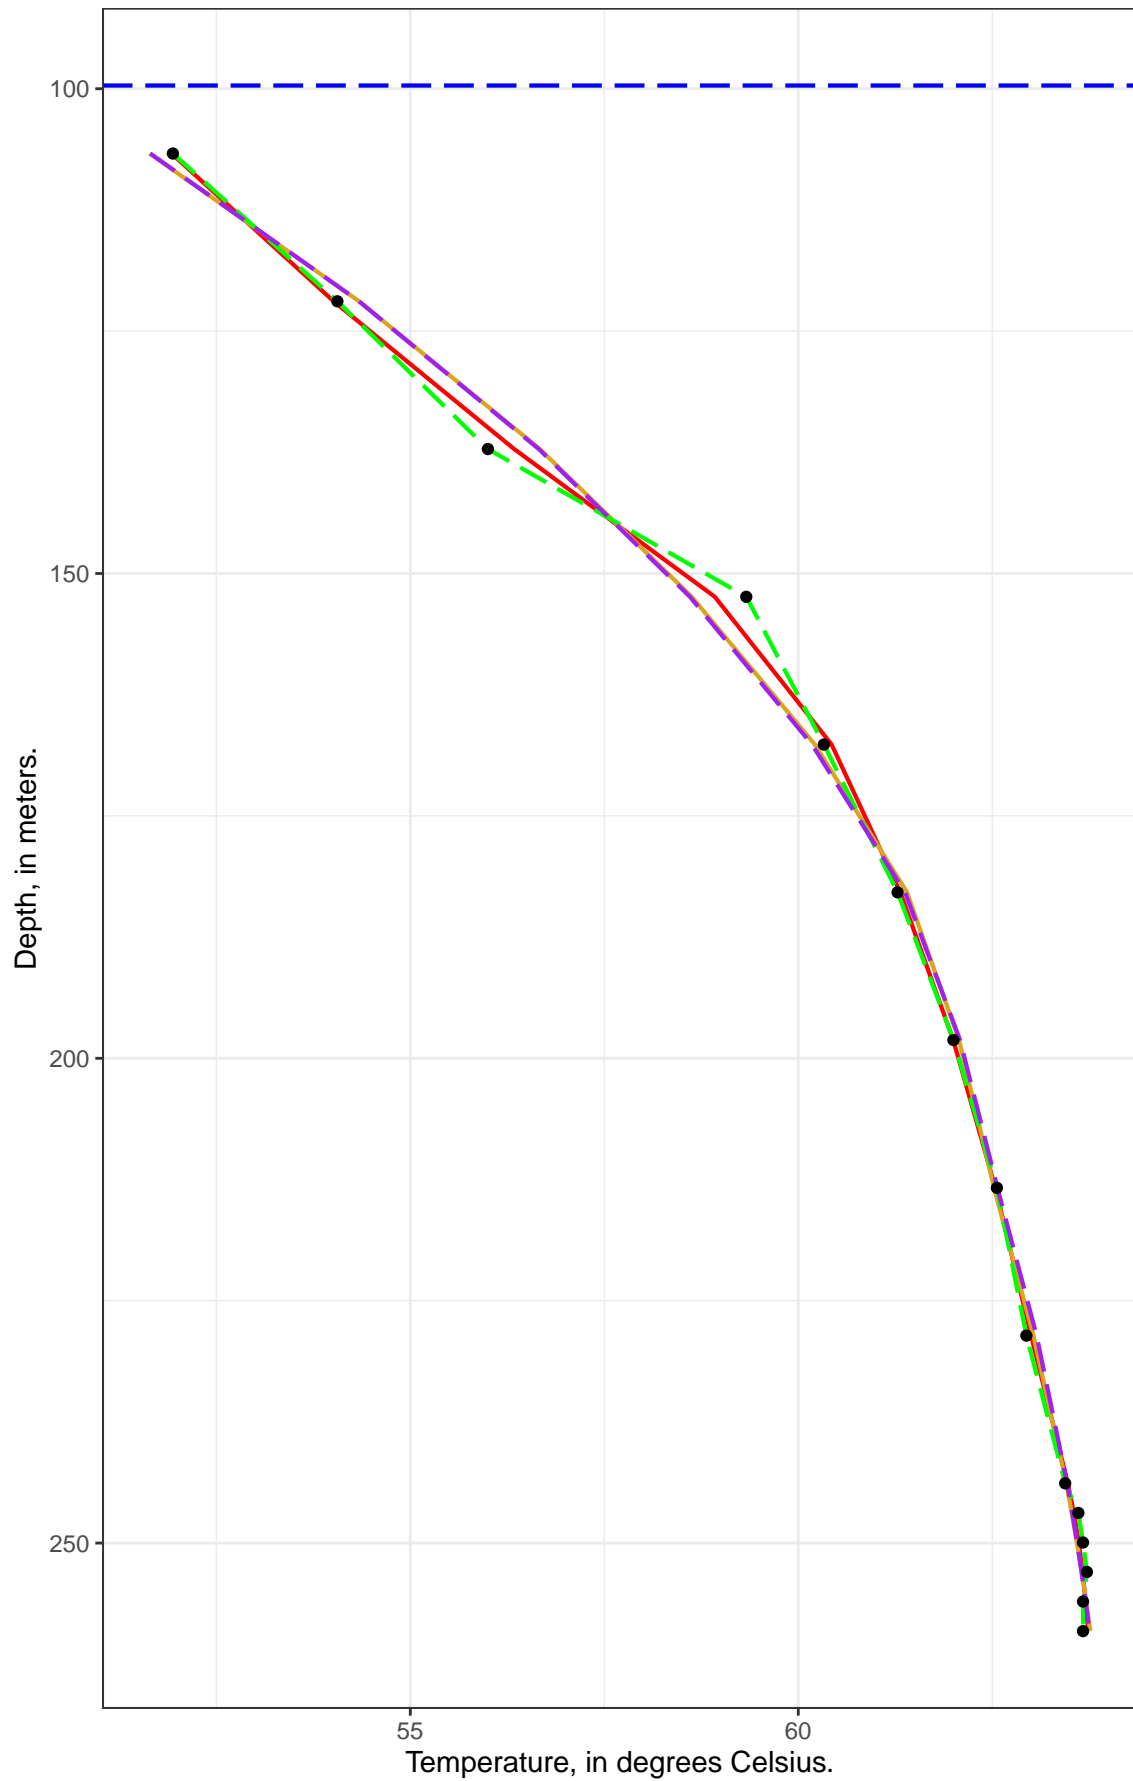

ID: 211 [NMSU-OW-1] First Derivative

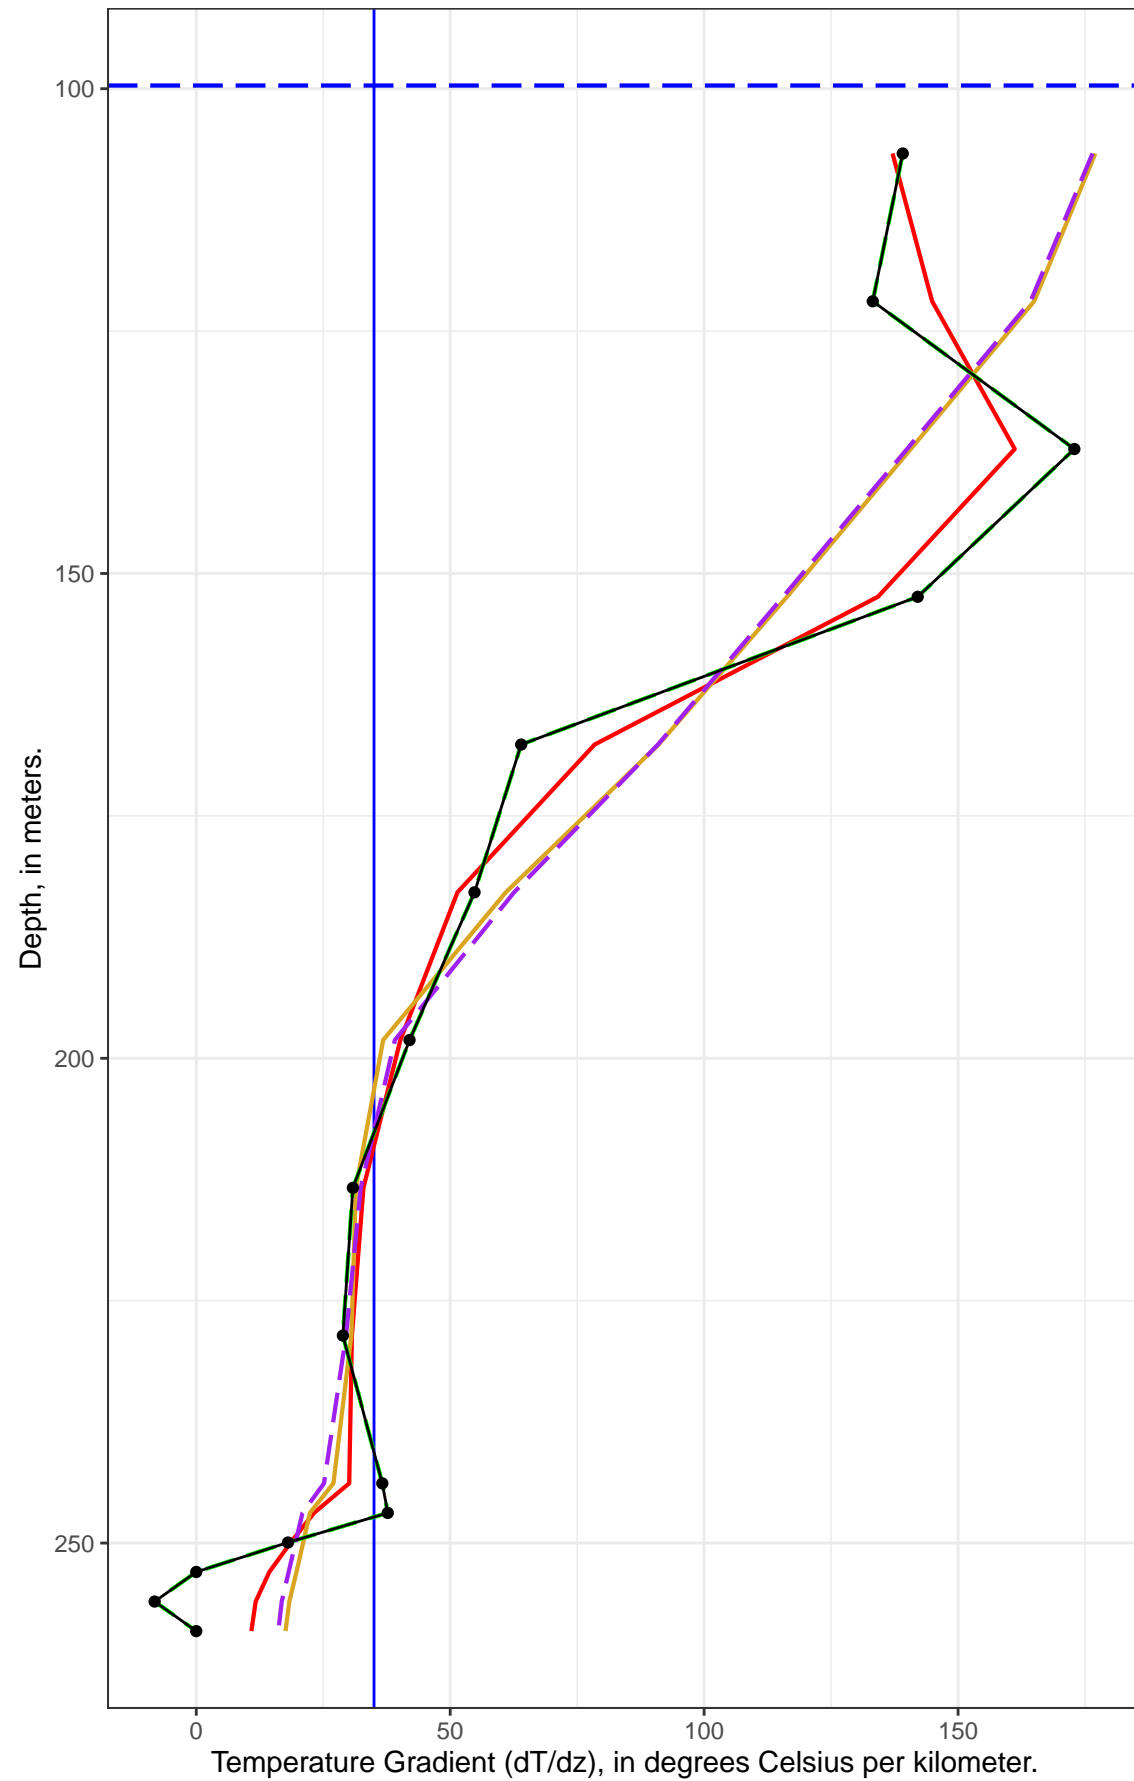

ID: 211 [NMSU-OW-1] Second Derivative

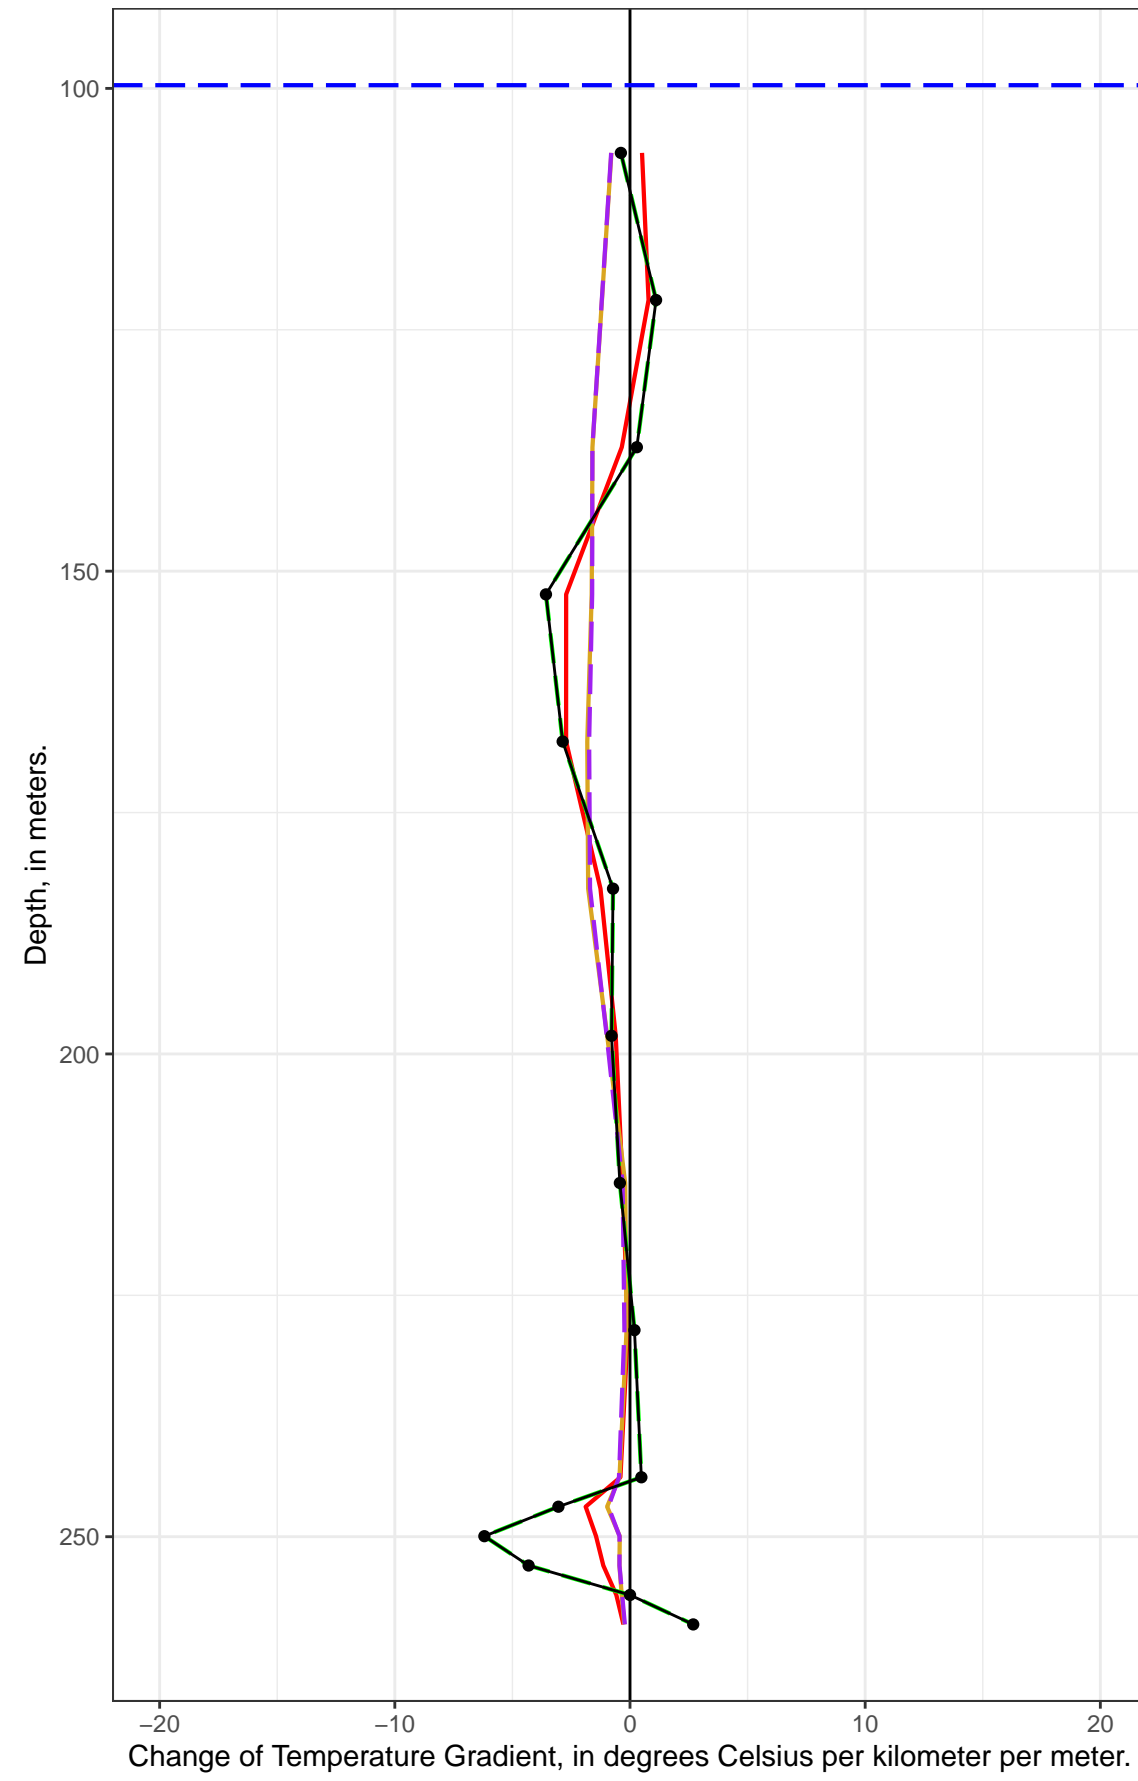

• Data — LOESS (AICC) — LOESS (constant) — LOESS (GCV) — Spline

• Data — LOESS (AICC) — LOESS (constant) — LOESS (GCV) — Spline

• Data — LOESS (AICC) — LOESS (constant) — LOESS (GCV) — Spline

ID: 215 [PG-1\_NMSU\_Production\_Well] Smoothed Profile

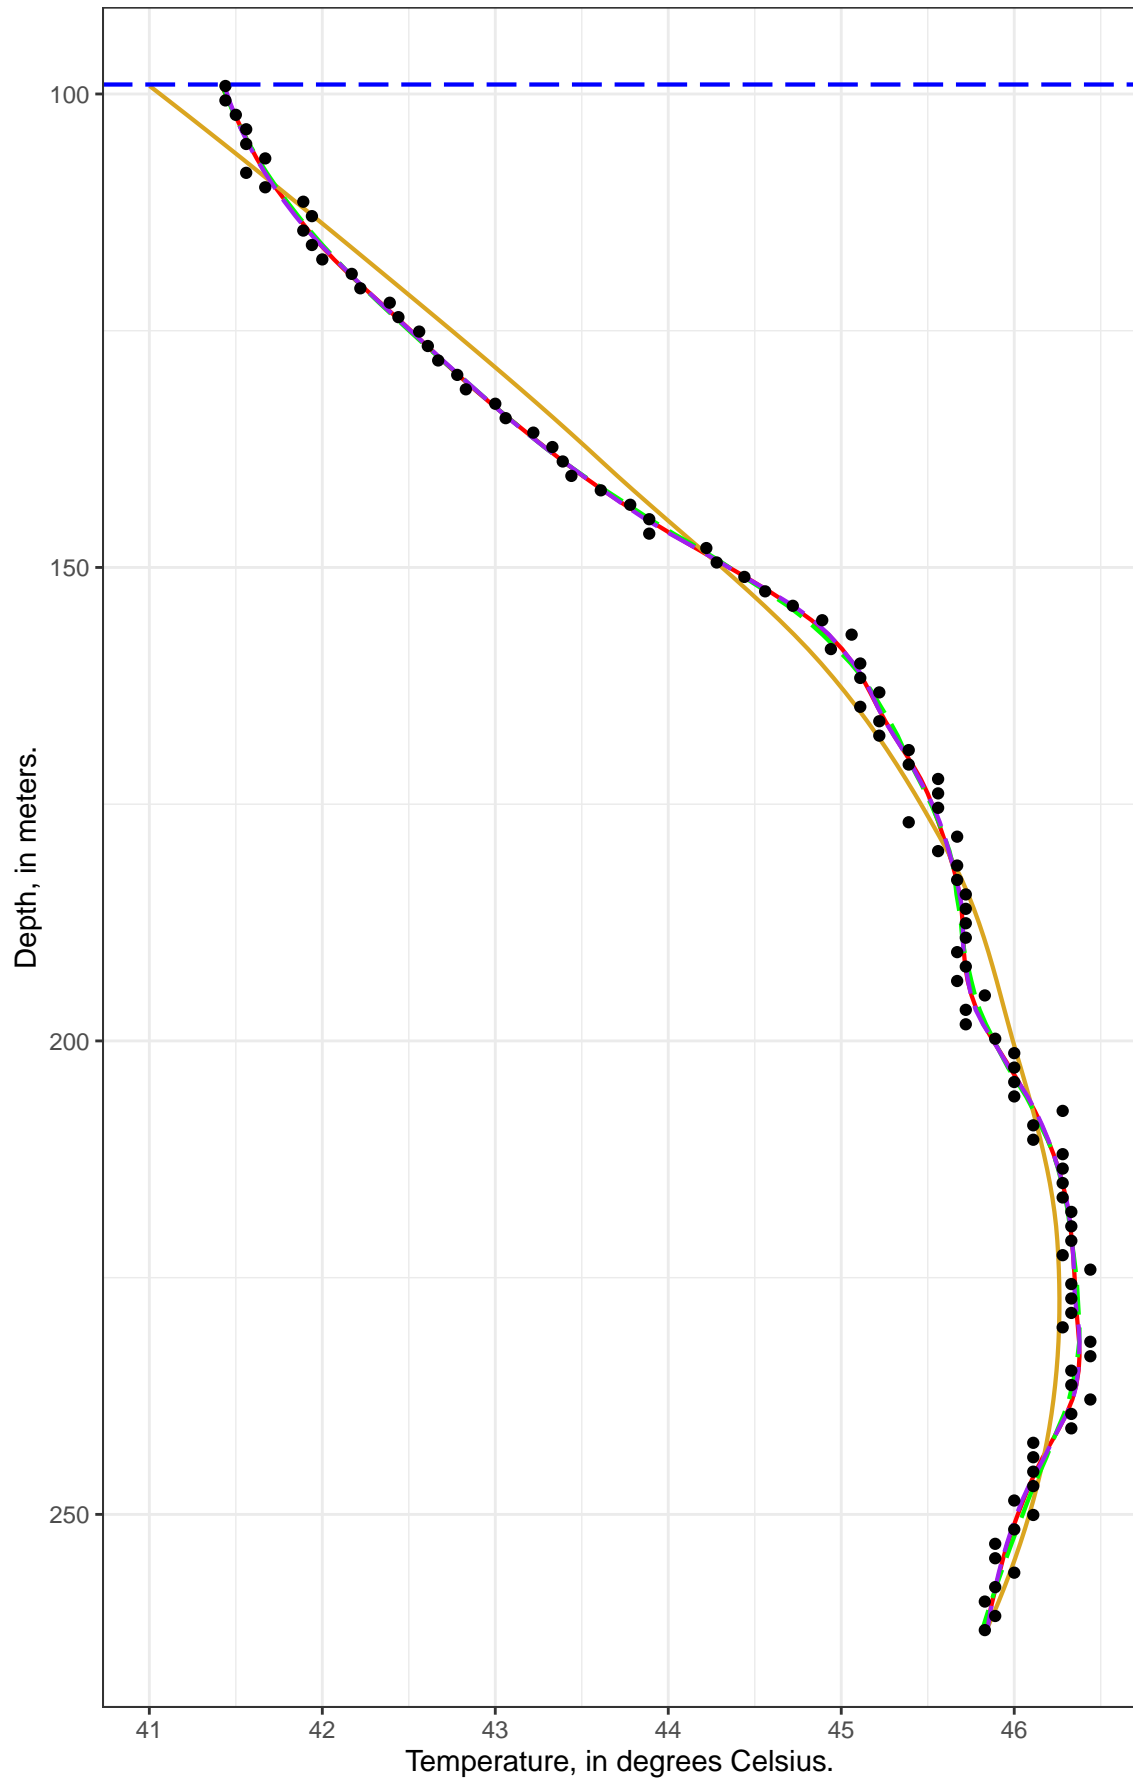

ID: 215 [PG-1\_NMSU\_Production\_Well] First Derivative

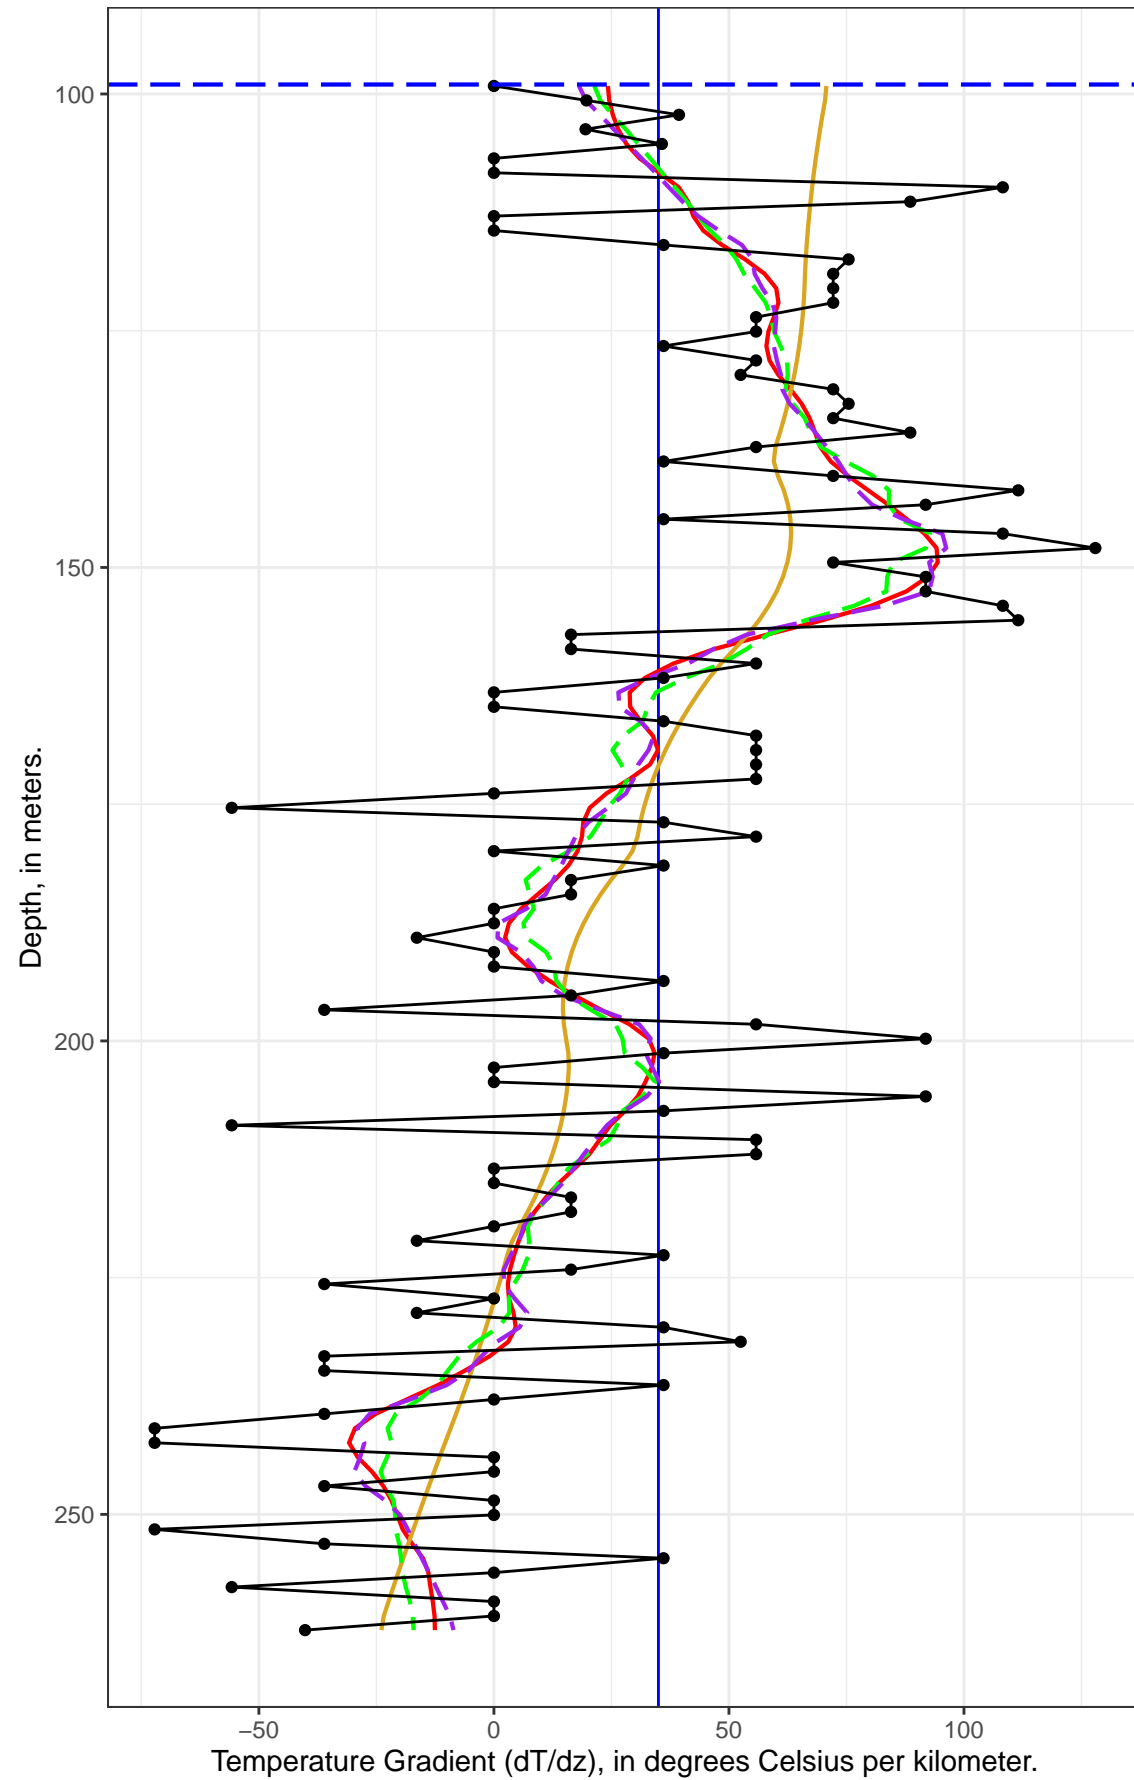

ID: 215 [PG-1\_NMSU\_Production\_Well] Second Derivative

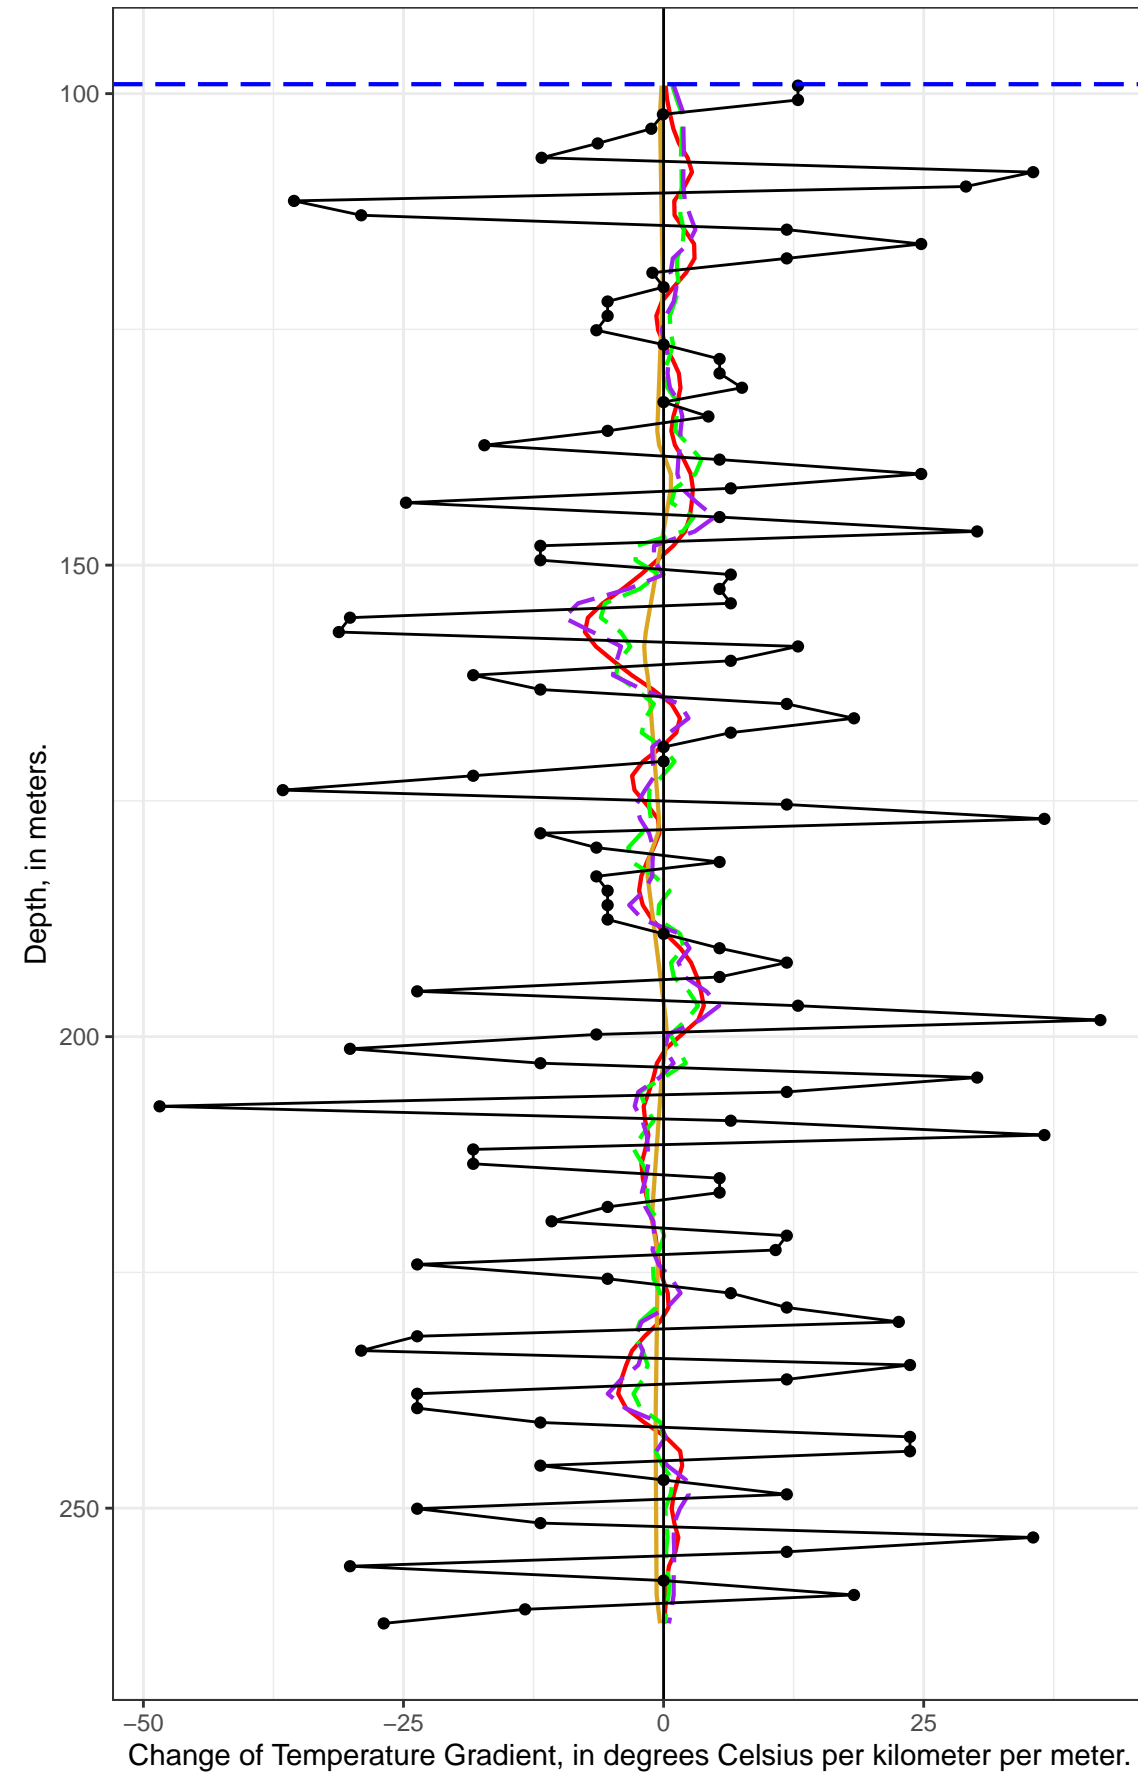

• Data — LOESS (AICC) — LOESS (constant) — LOESS (GCV) — Spline

• Data — LOESS (AICC) — LOESS (constant) — LOESS (GCV) — Spline

• Data — LOESS (AICC) — LOESS (constant) — LOESS (GCV) — Spline

ID: 216 [PG-3\_NMSU\_PRODUCTION\_Well] Smoothed Profile

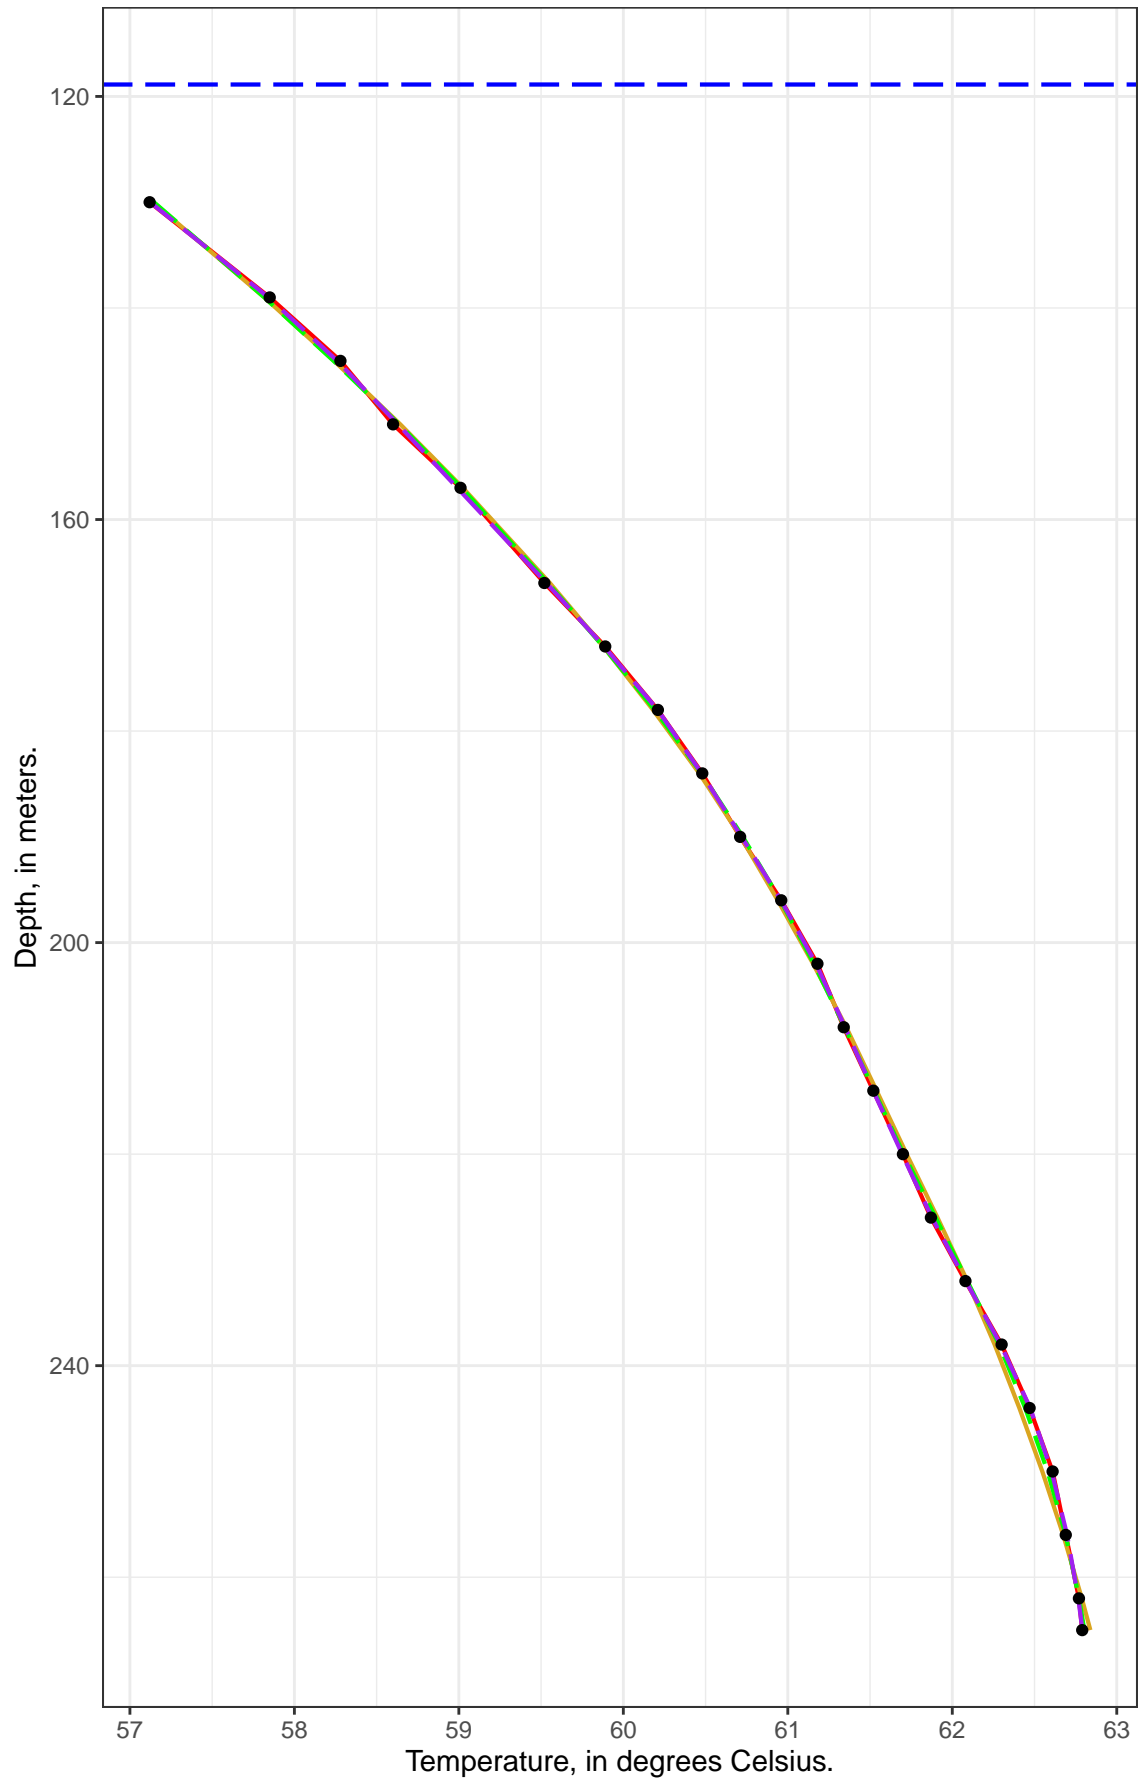

ID: 216 [PG-3\_NMSU\_PRODUCTION\_Well] First Derivative

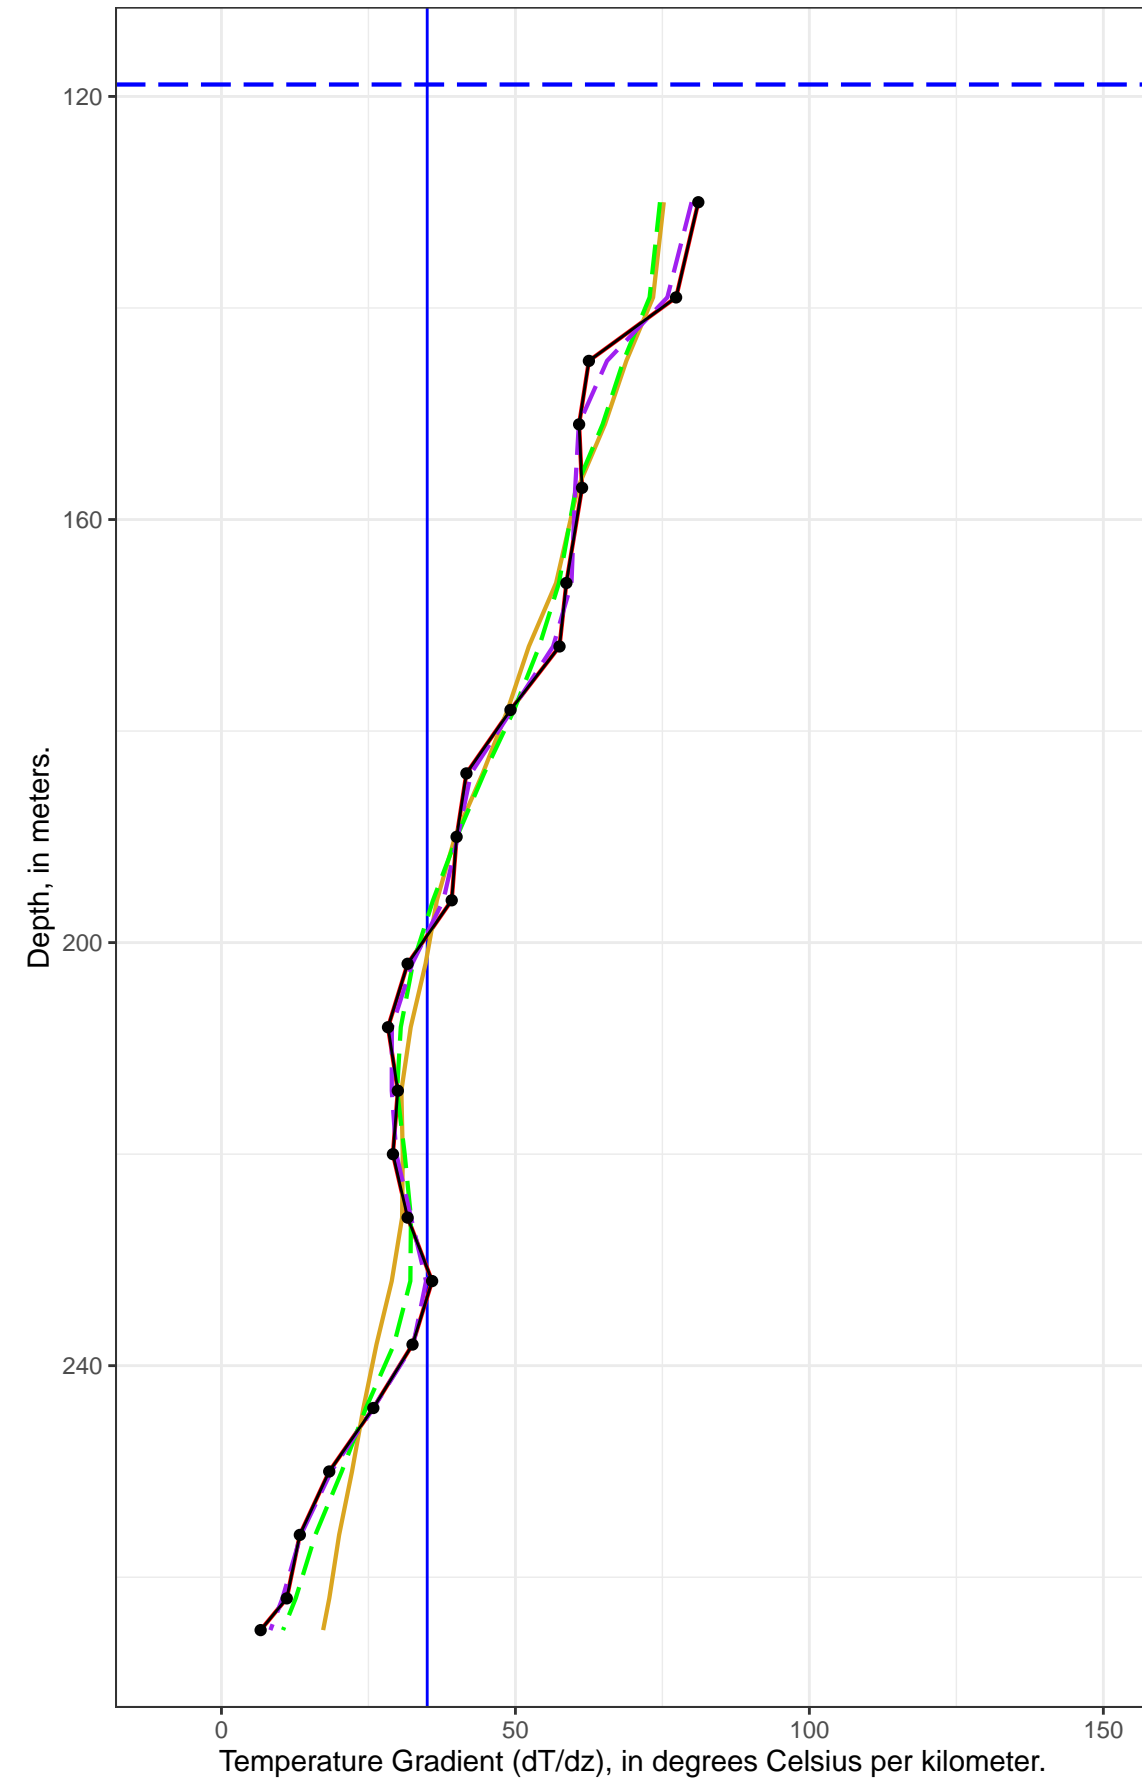

ID: 216 [PG-3\_NMSU\_PRODUCTION\_Well] Second Derivative

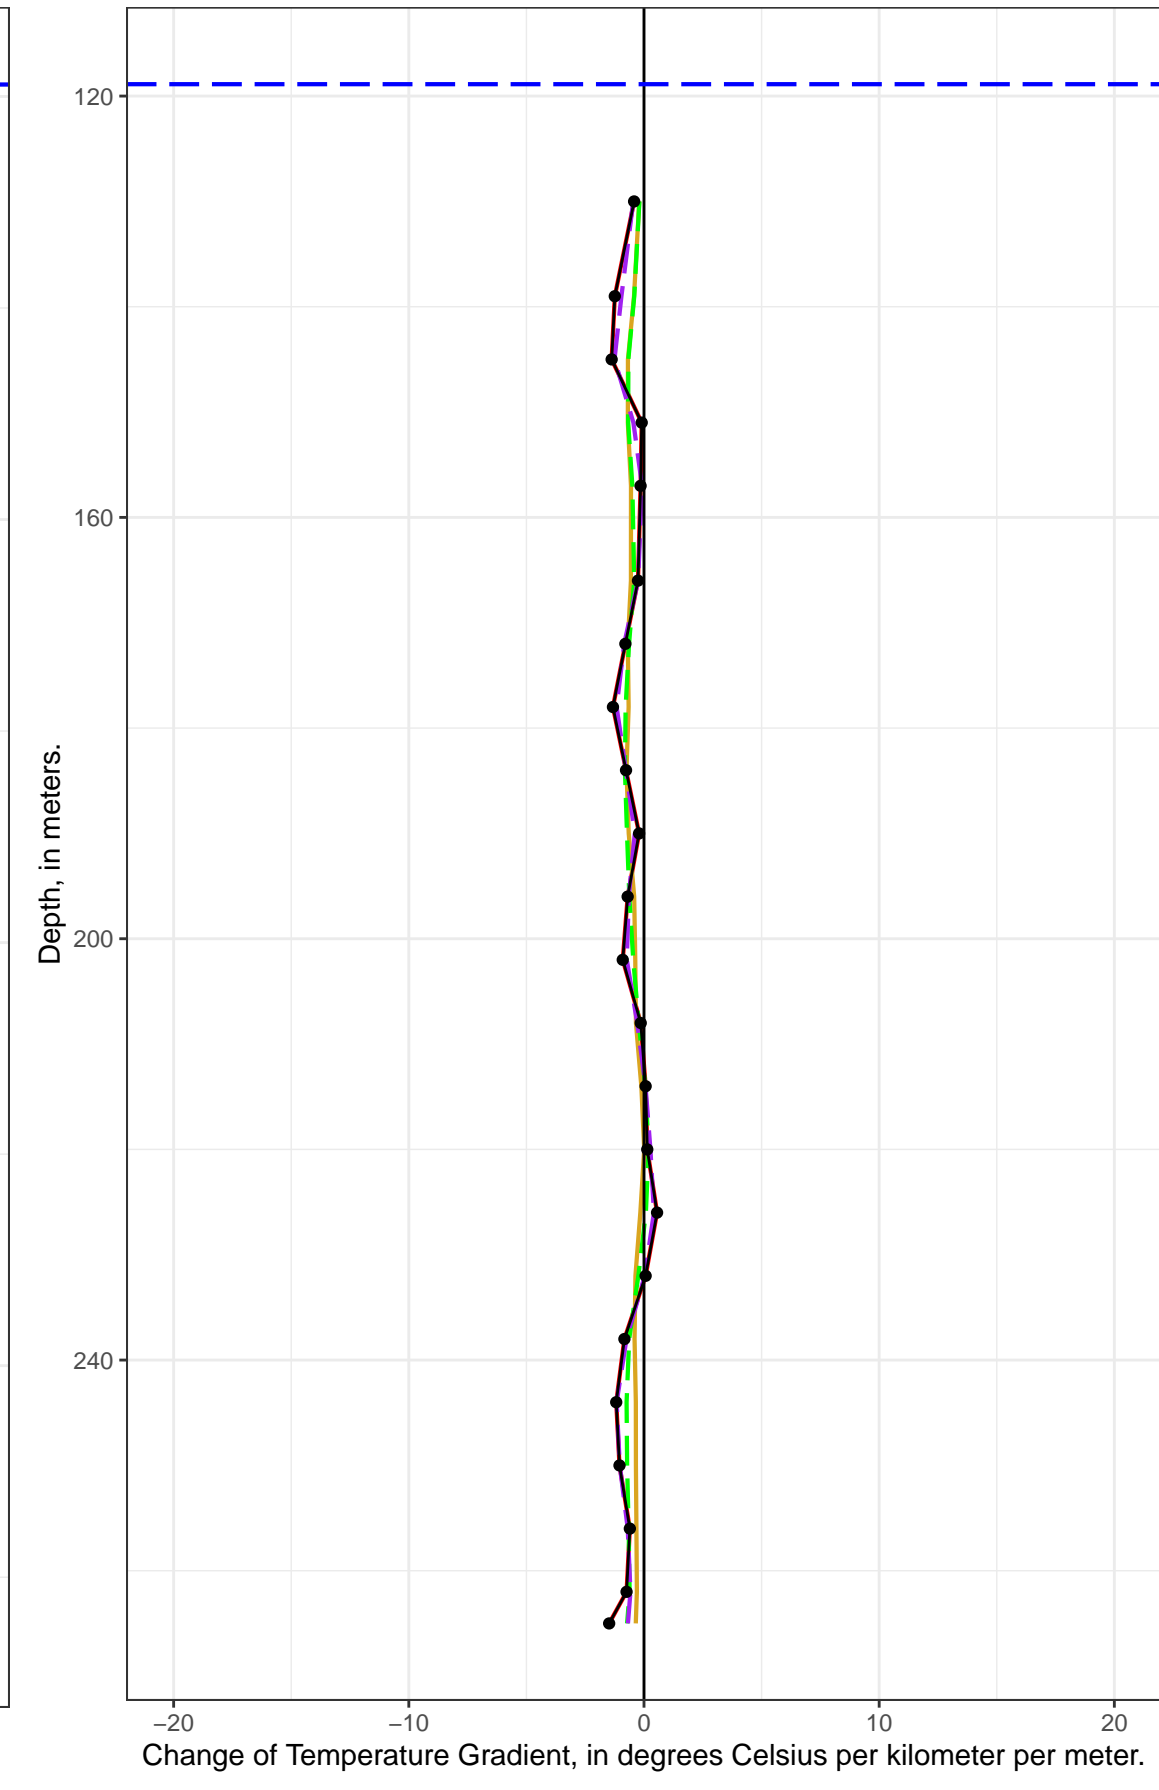

• Data — LOESS (AICC) — LOESS (constant) — LOESS (GCV) — Spline

• Data — LOESS (AICC) — LOESS (constant) — LOESS (GCV) — Spline

• Data — LOESS (AICC) — LOESS (constant) — LOESS (GCV) — Spline

ID: 219 [Phillips\_KH-2] Smoothed Profile

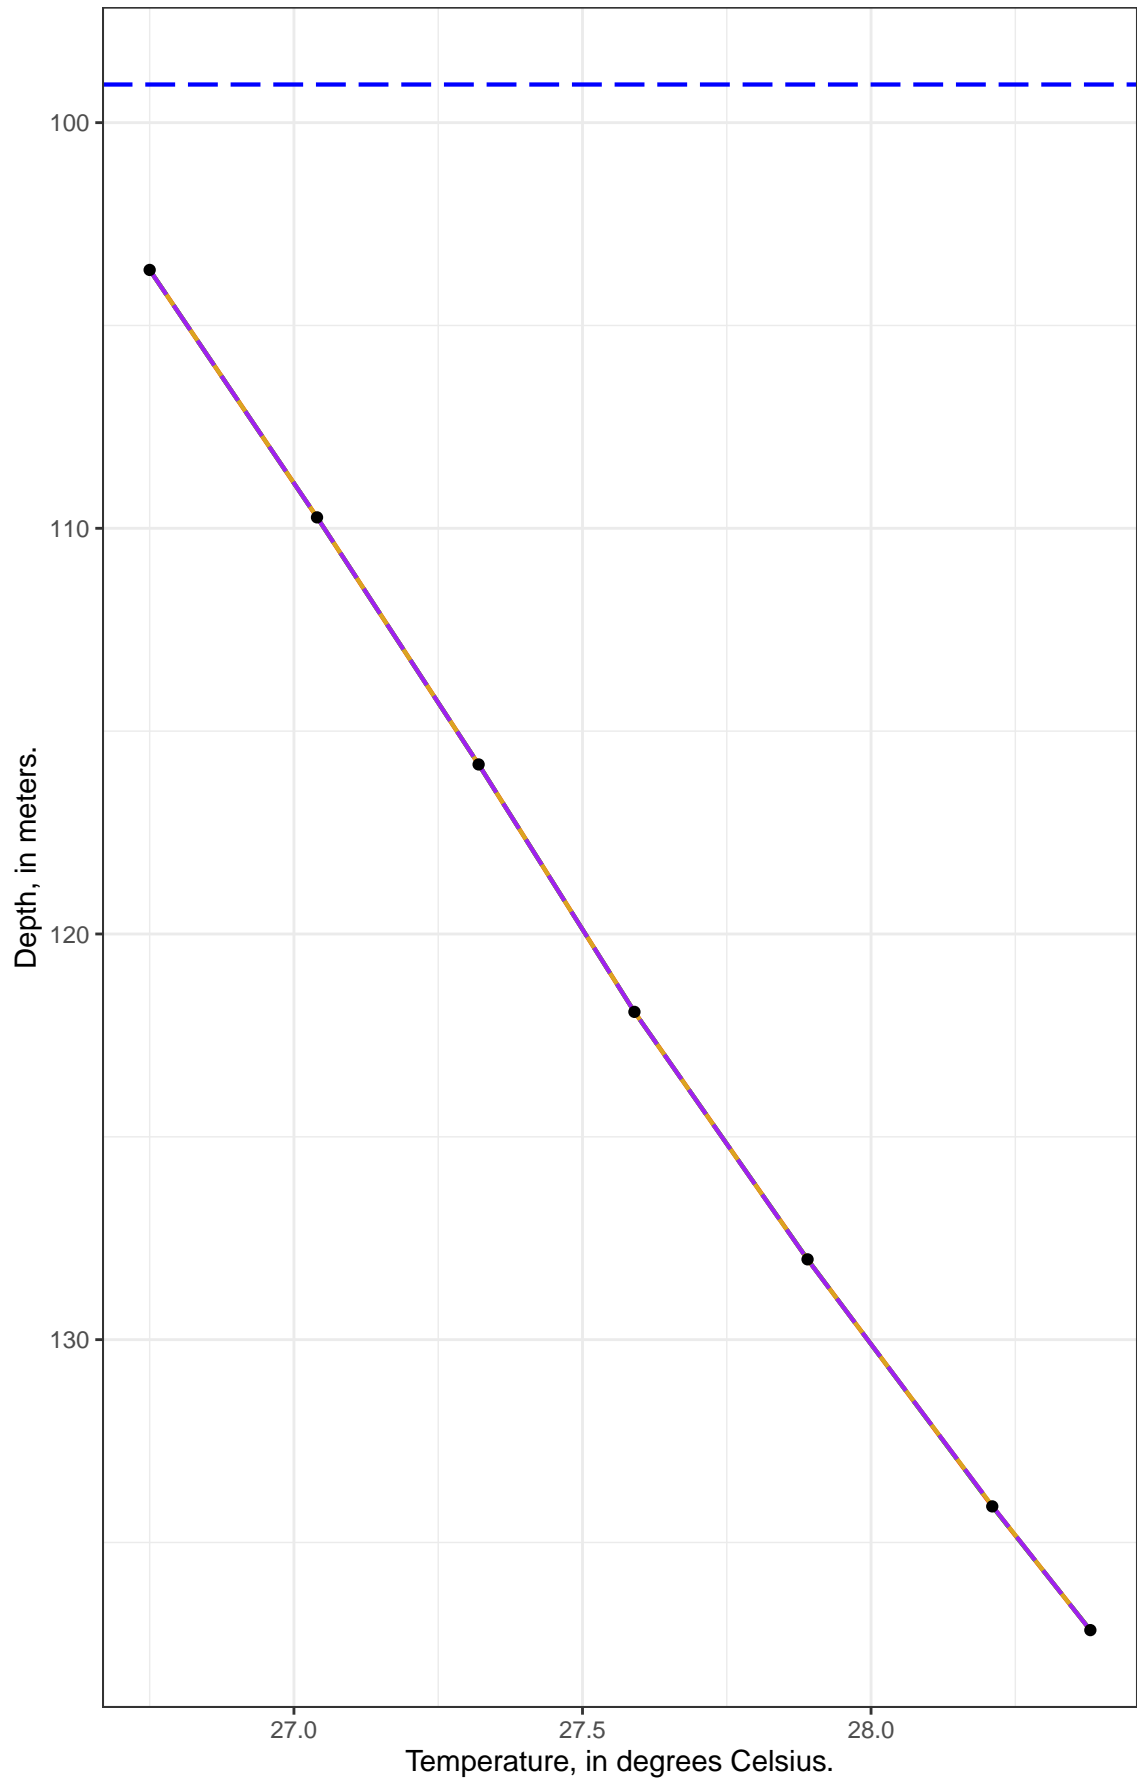

ID: 219 [Phillips\_KH-2] First Derivative

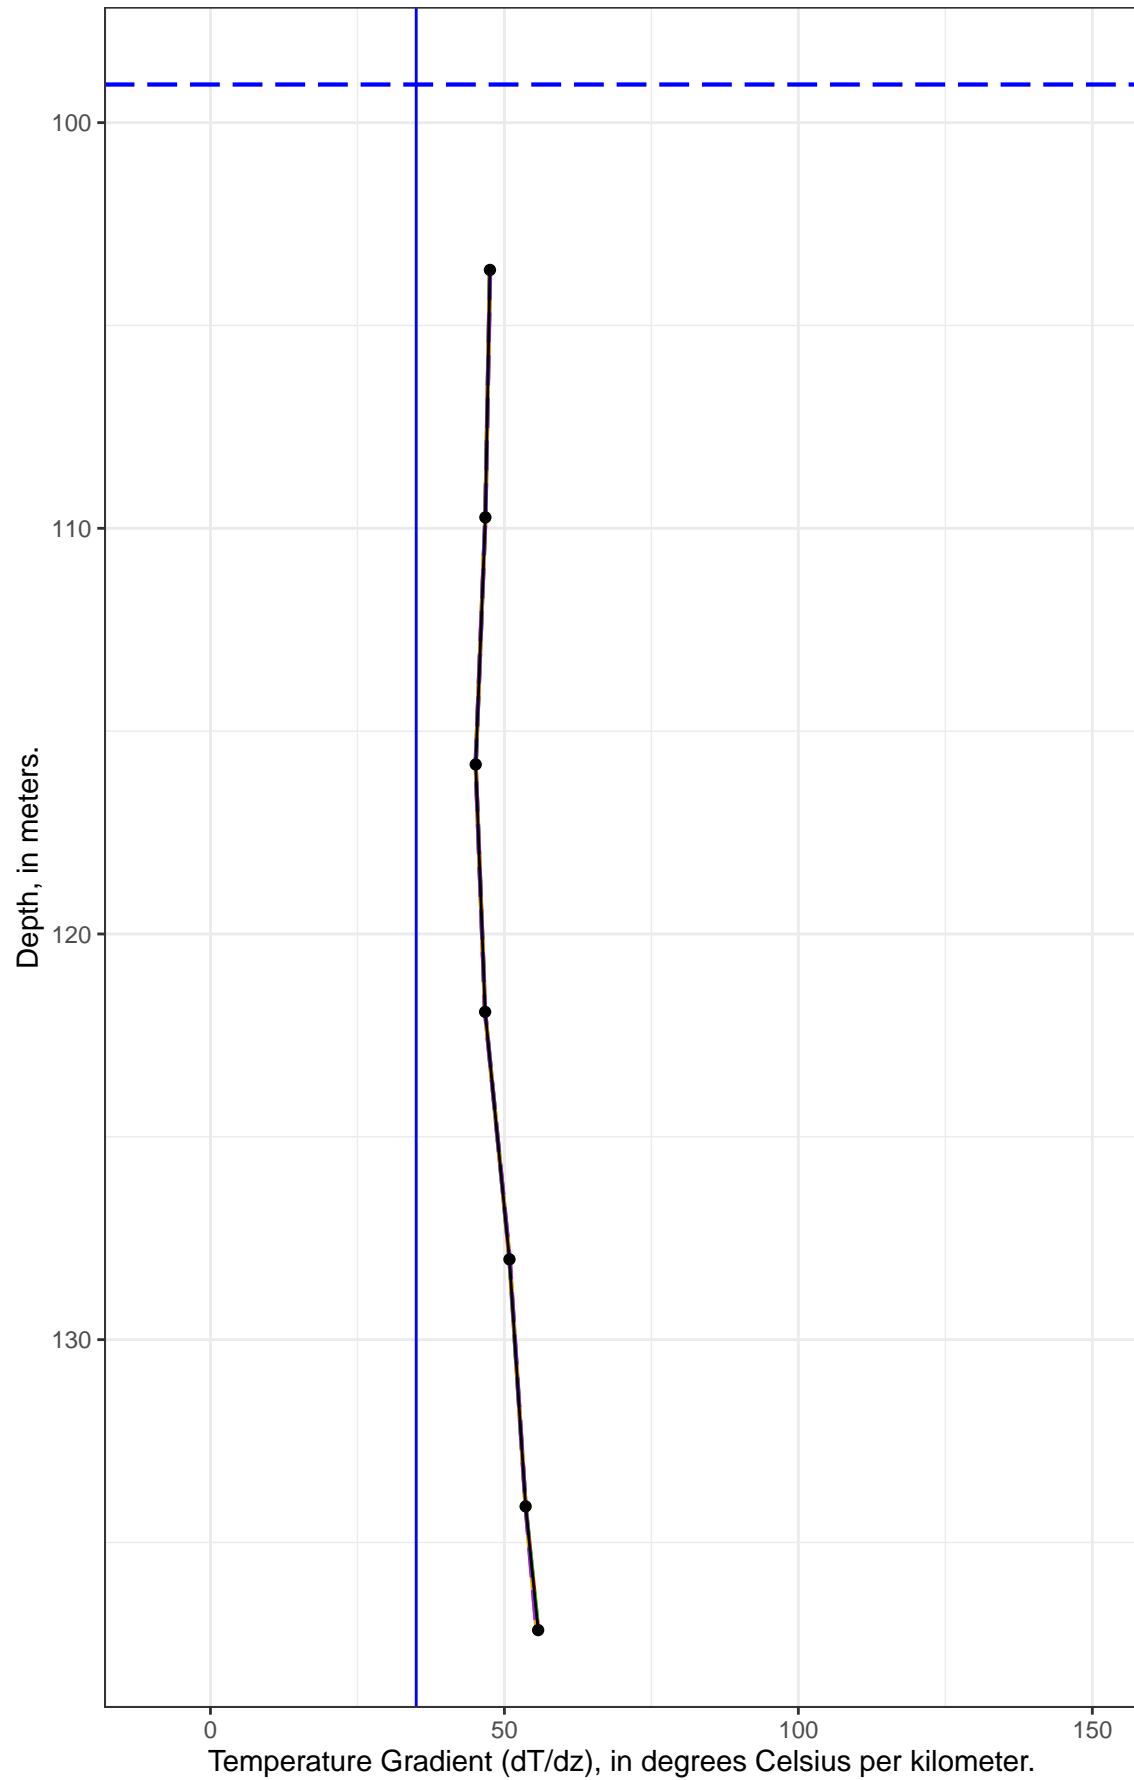

ID: 219 [Phillips\_KH-2] Second Derivative

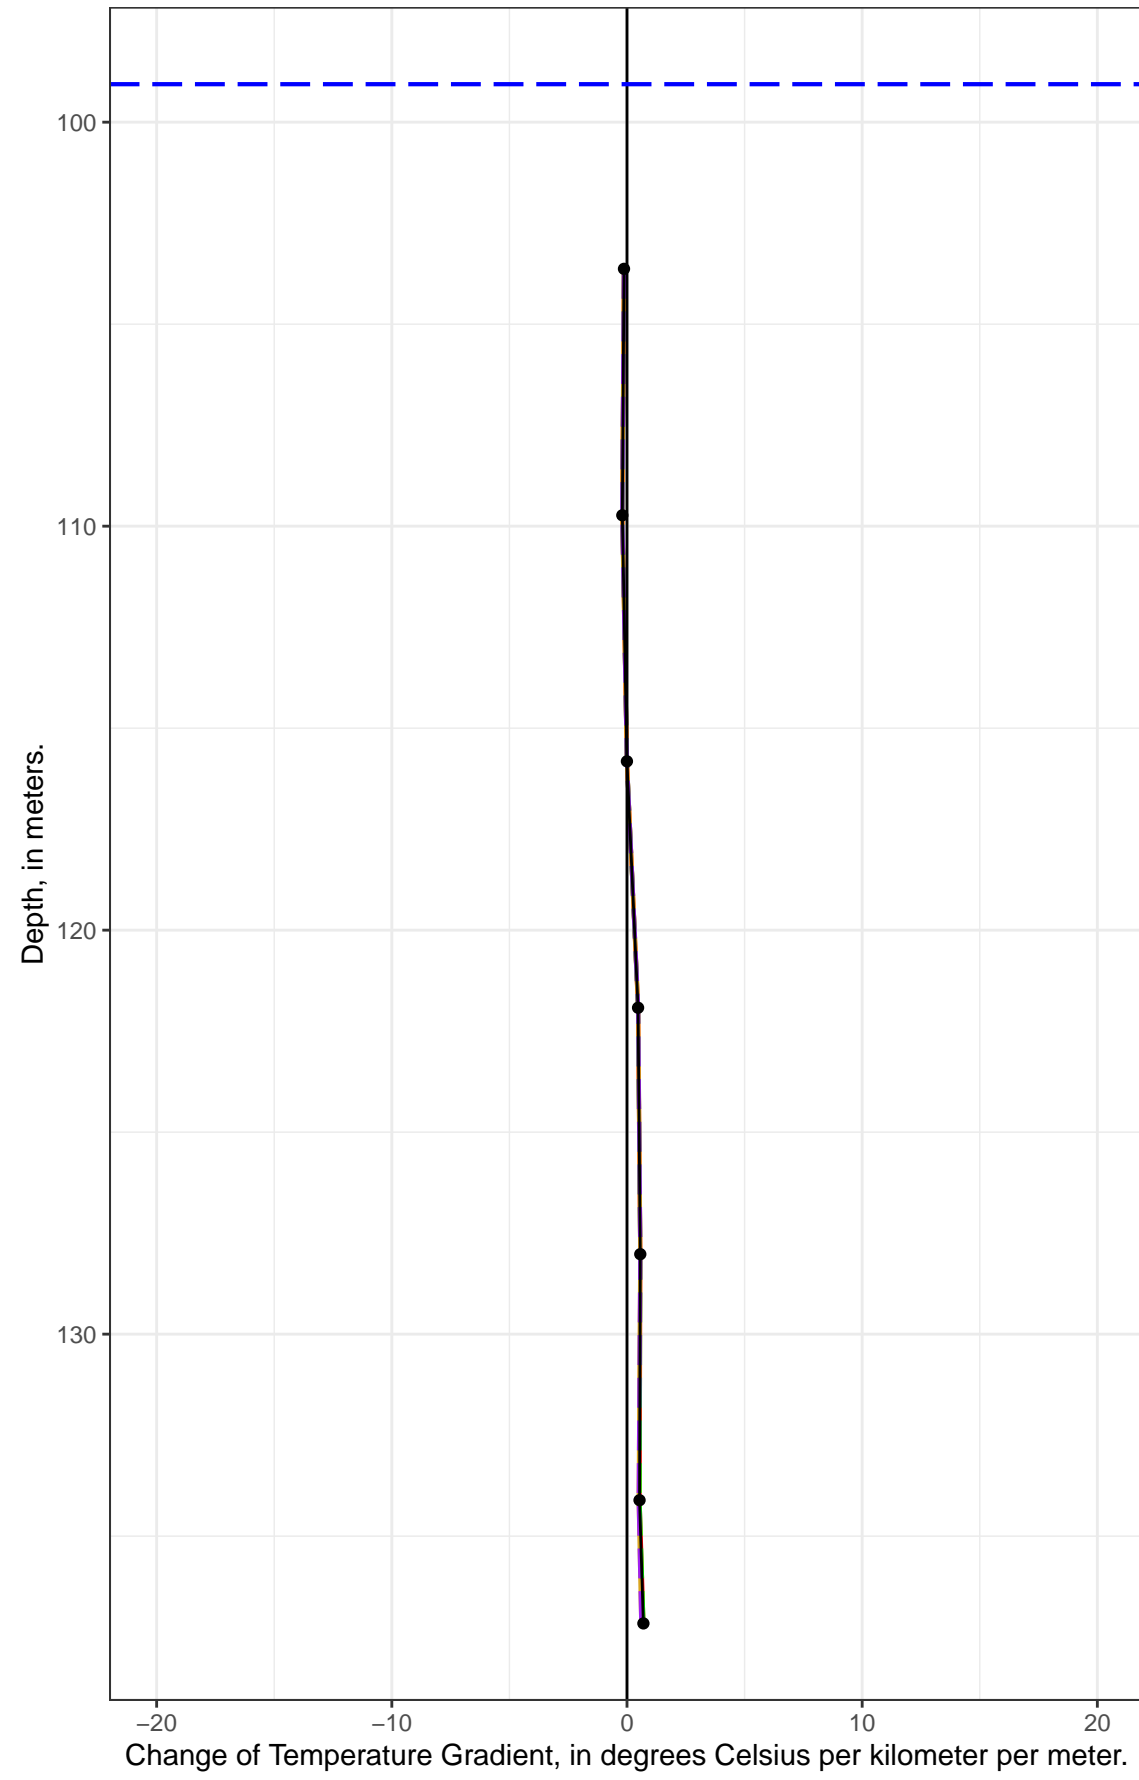

• Data — LOESS (AICC) — LOESS (constant) — LOESS (GCV) — Spline

• Data — LOESS (AICC) — LOESS (constant) — LOESS (GCV) — Spline

• Data — LOESS (AICC) — LOESS (constant) — LOESS (GCV) — Spline

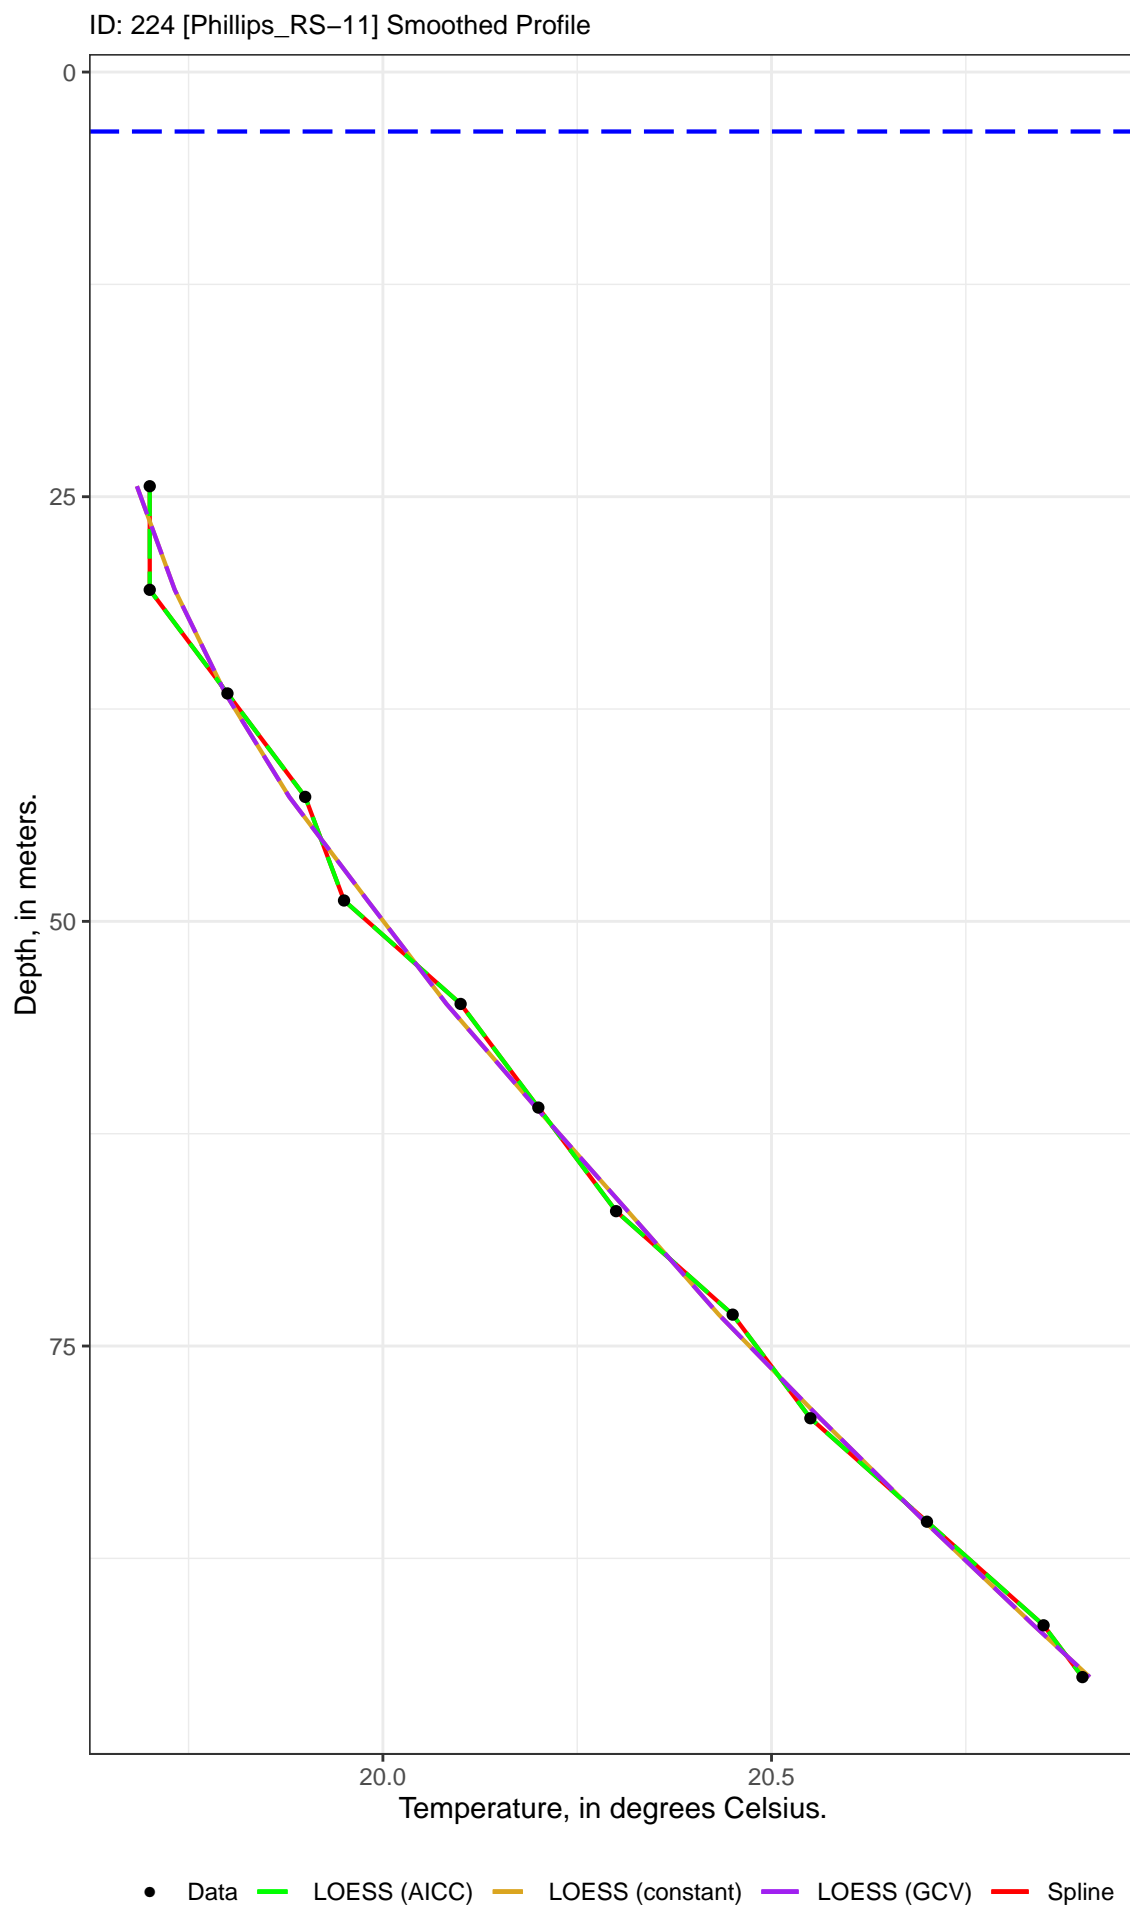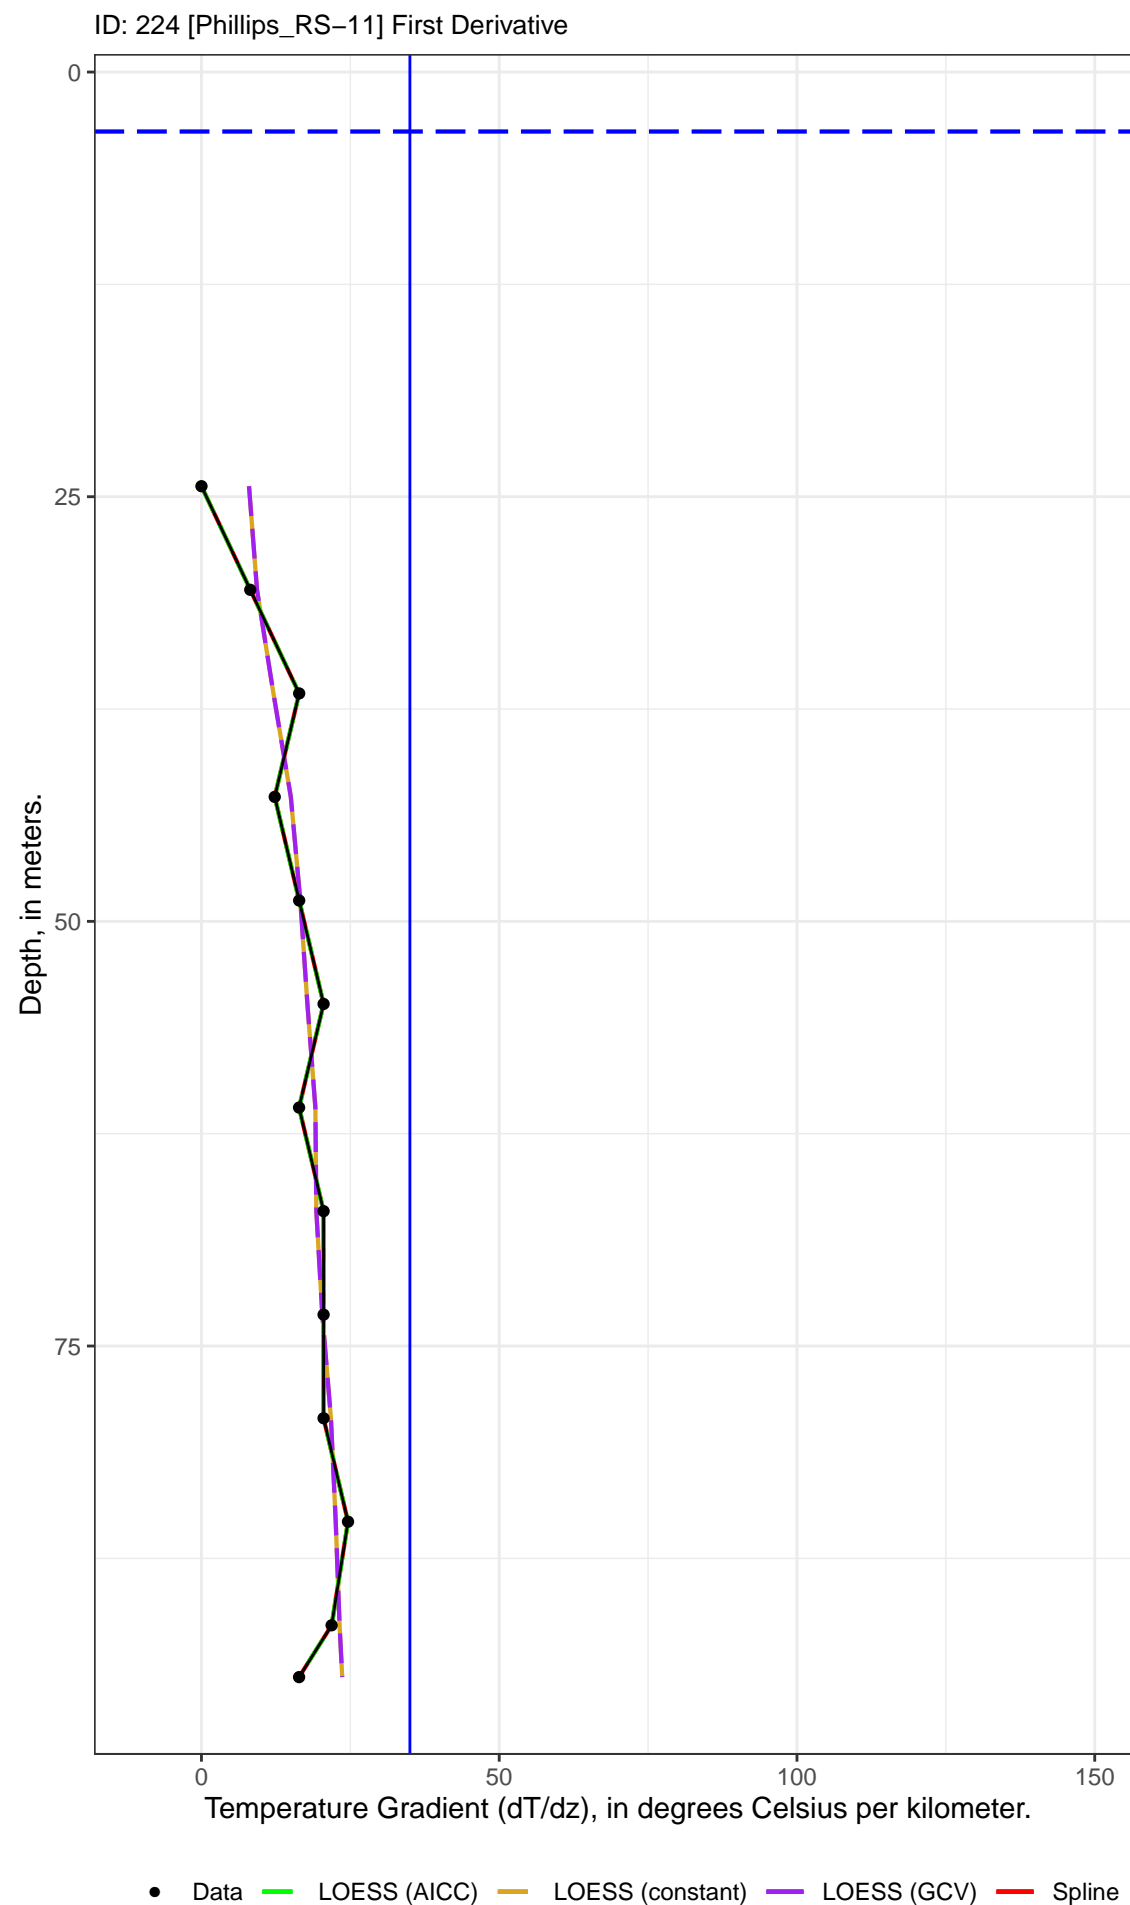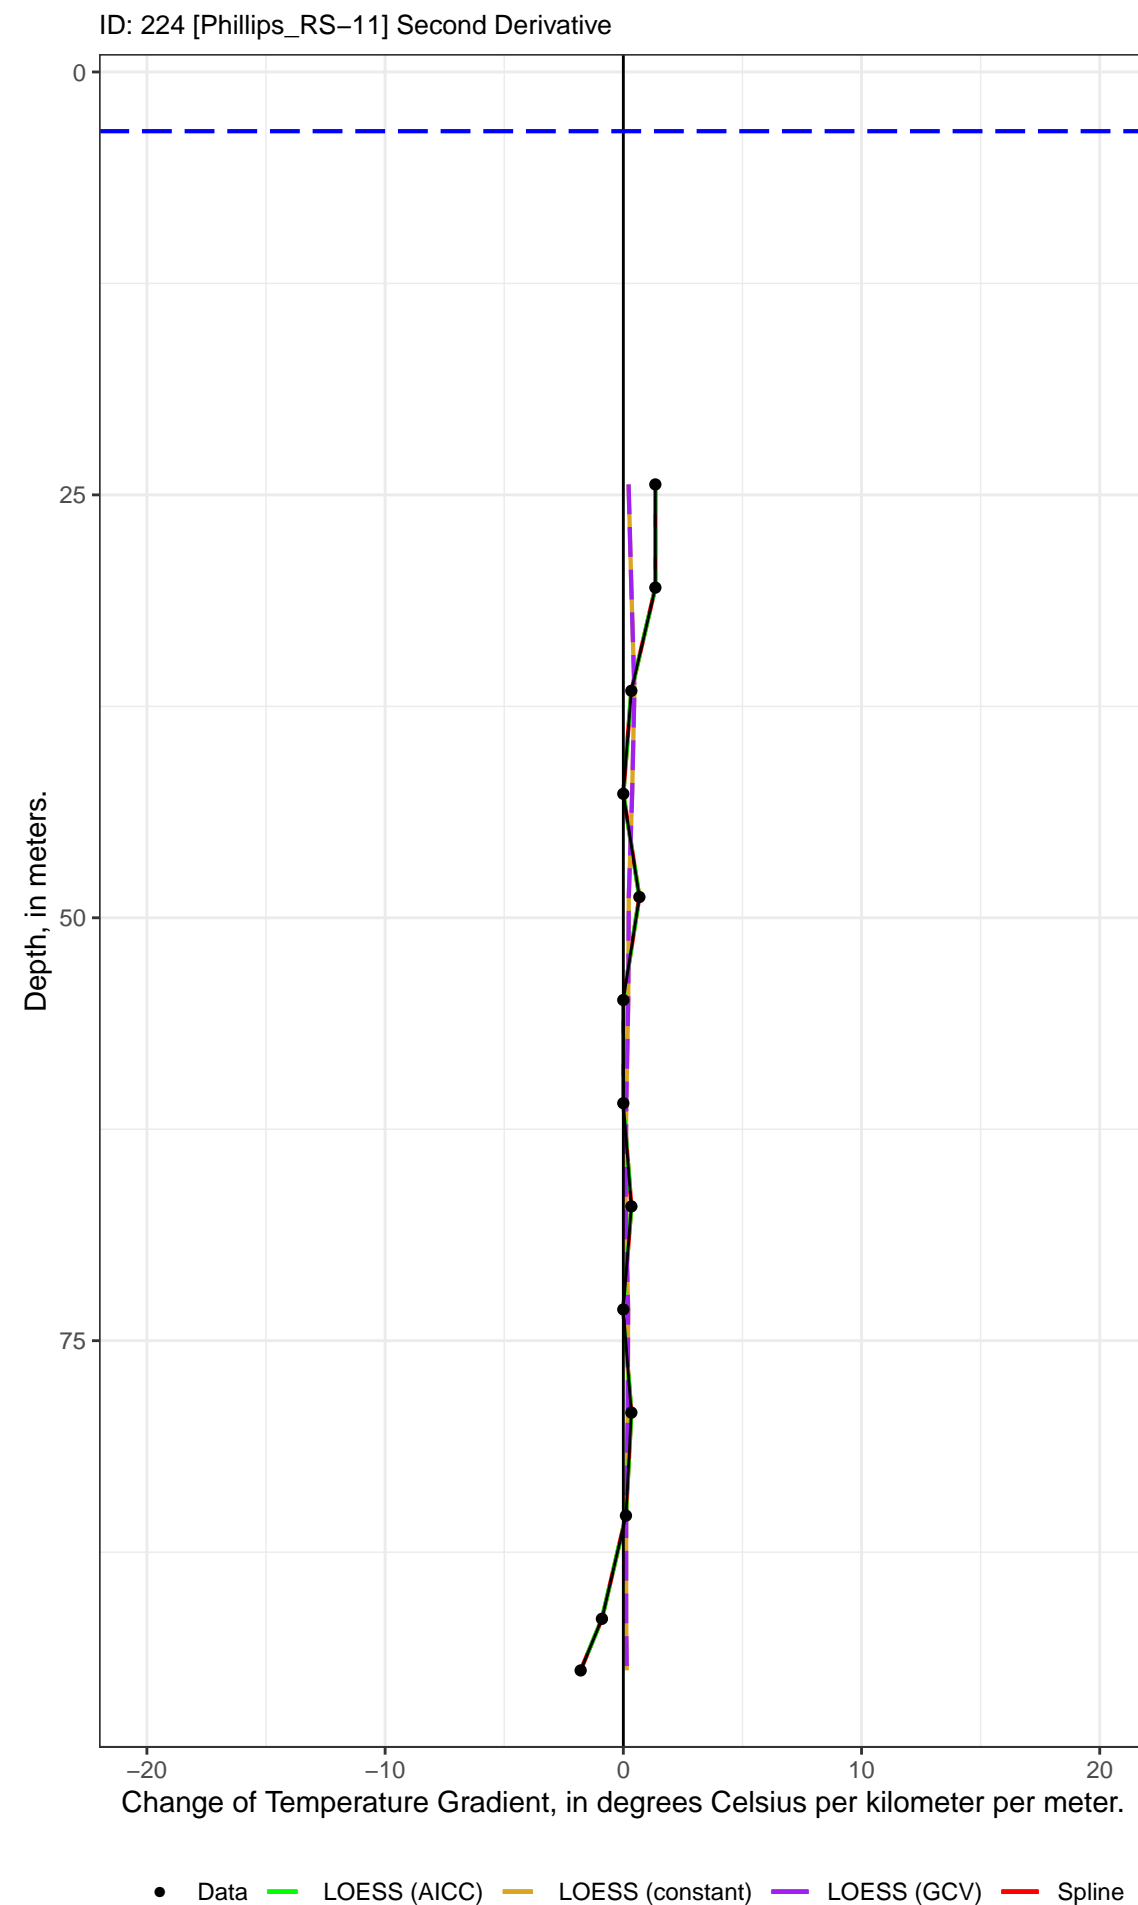

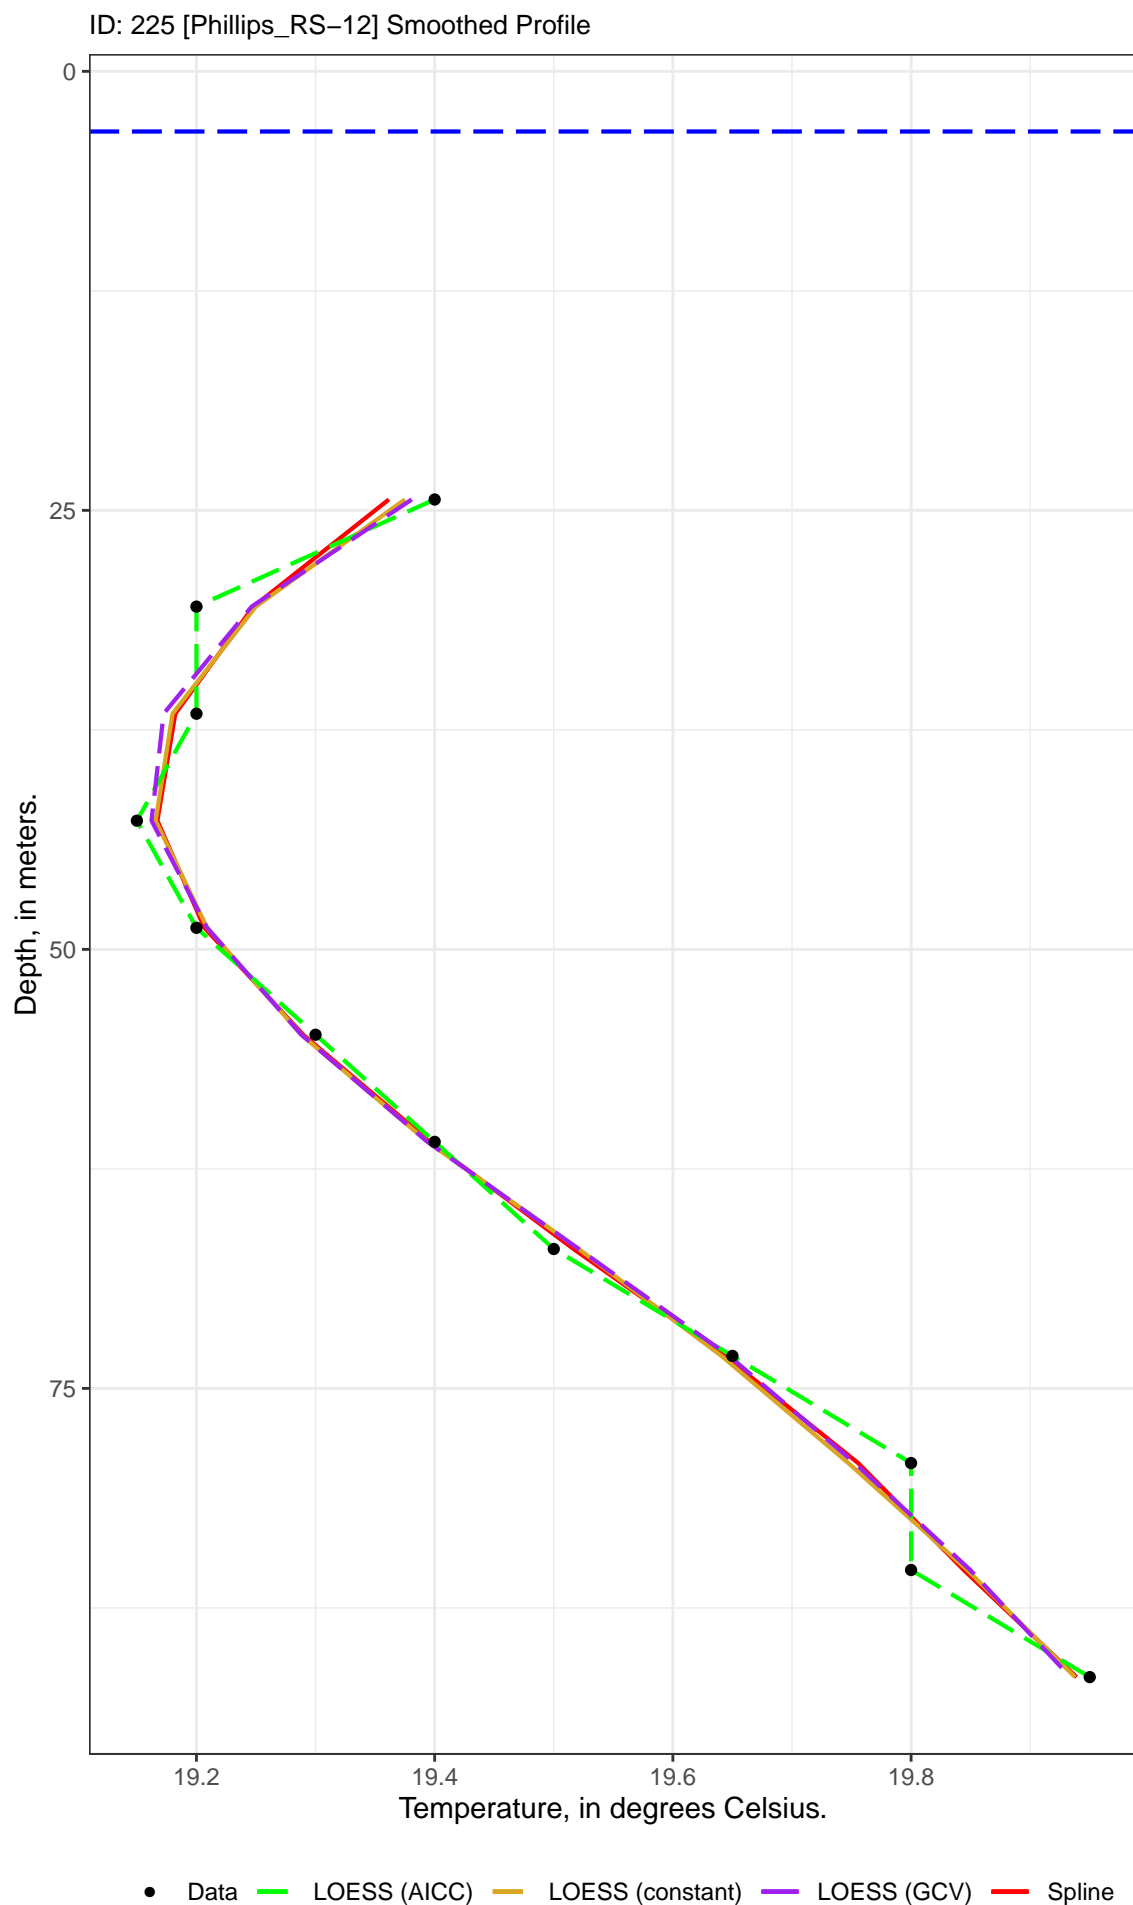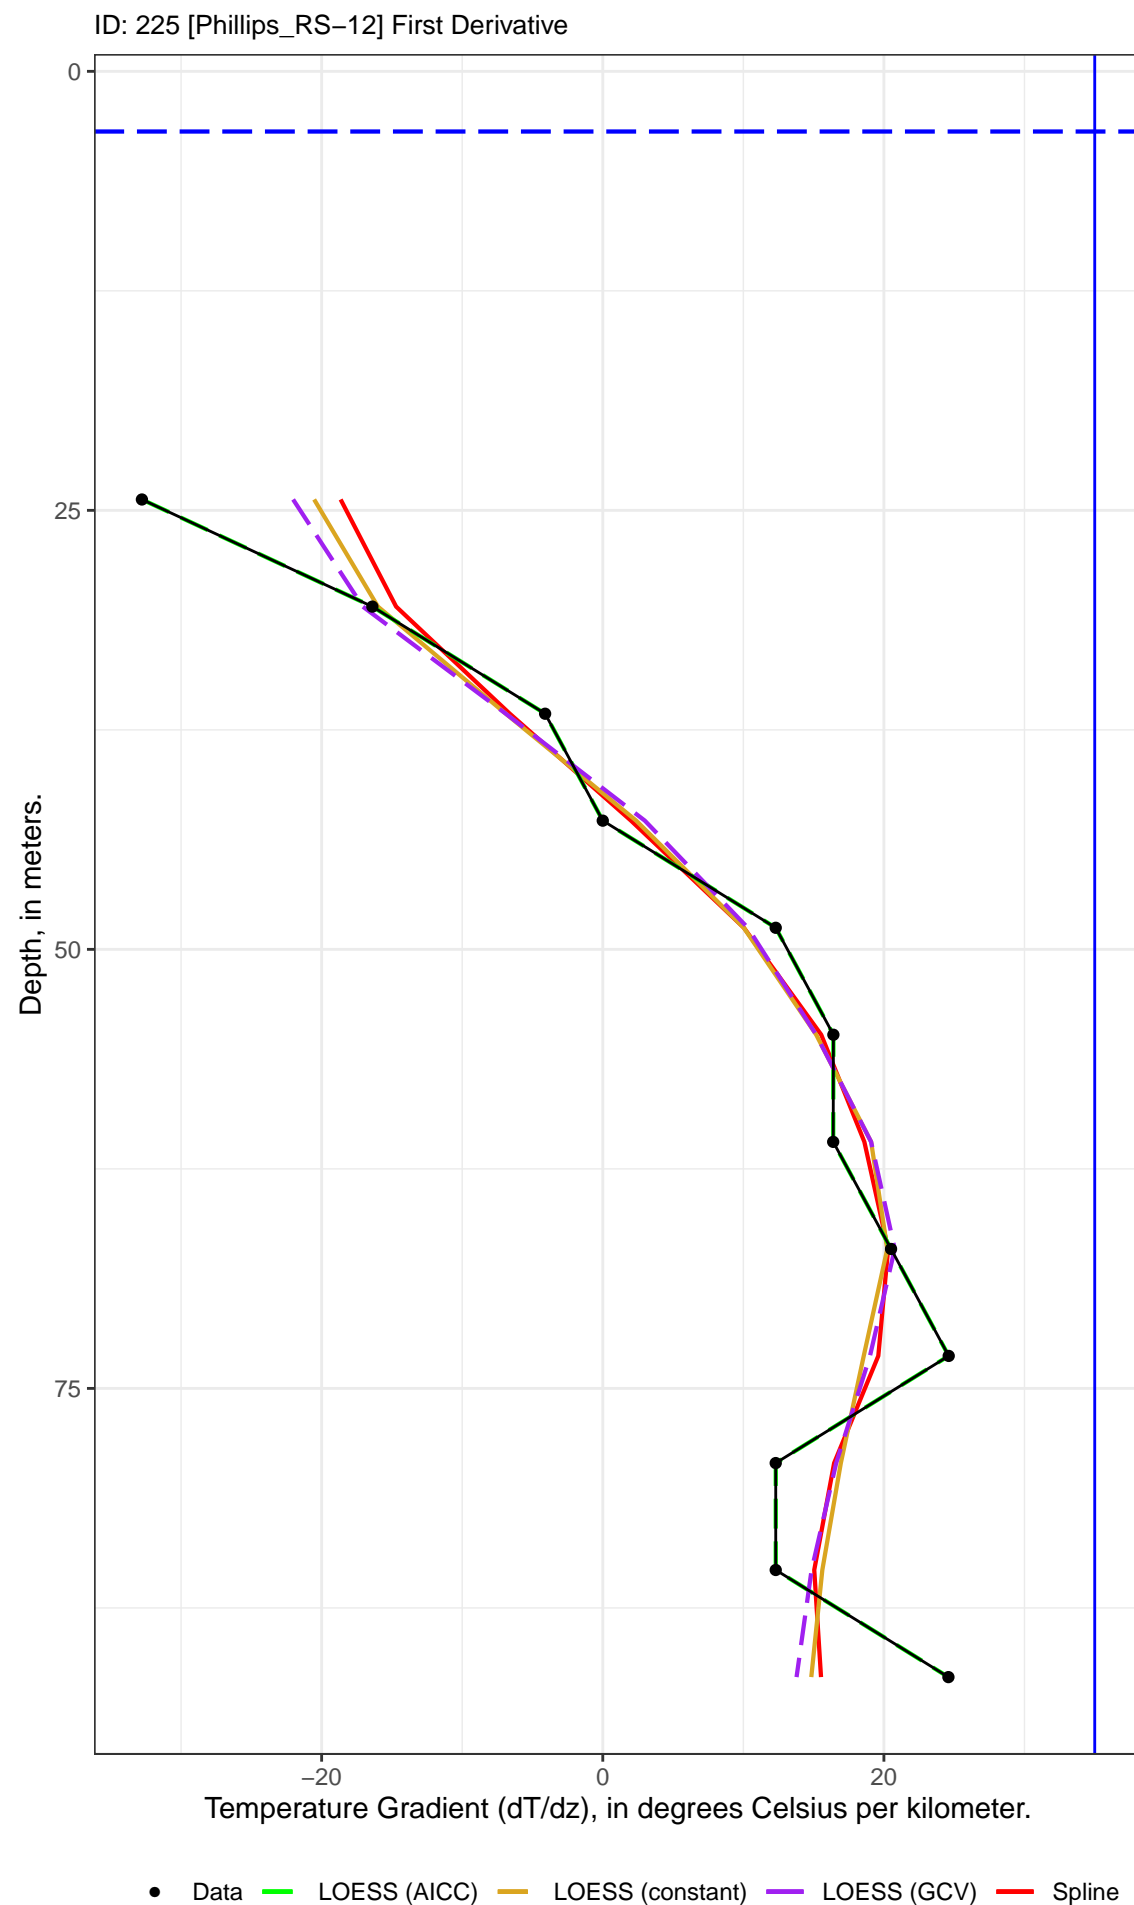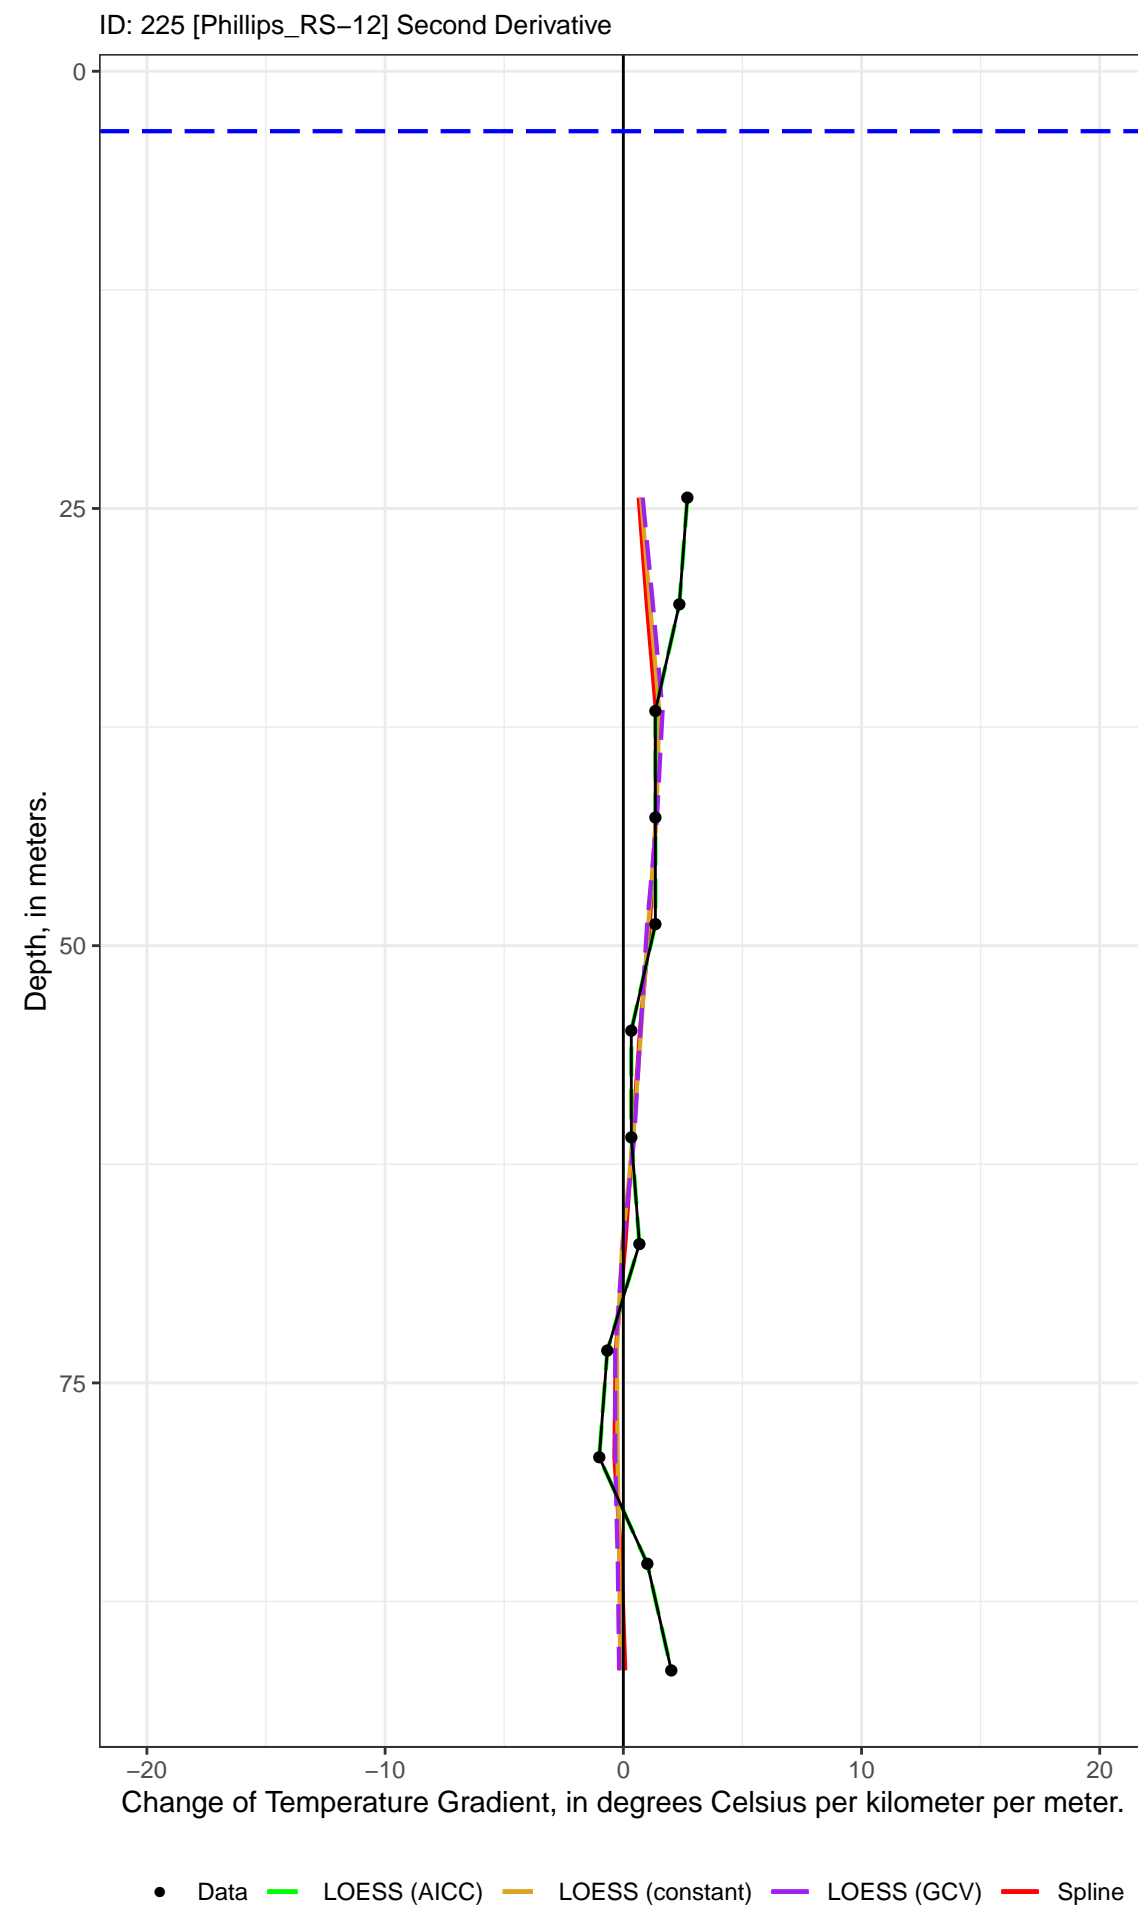

ID: 229 [Phillips\_RS-9] Smoothed Profile

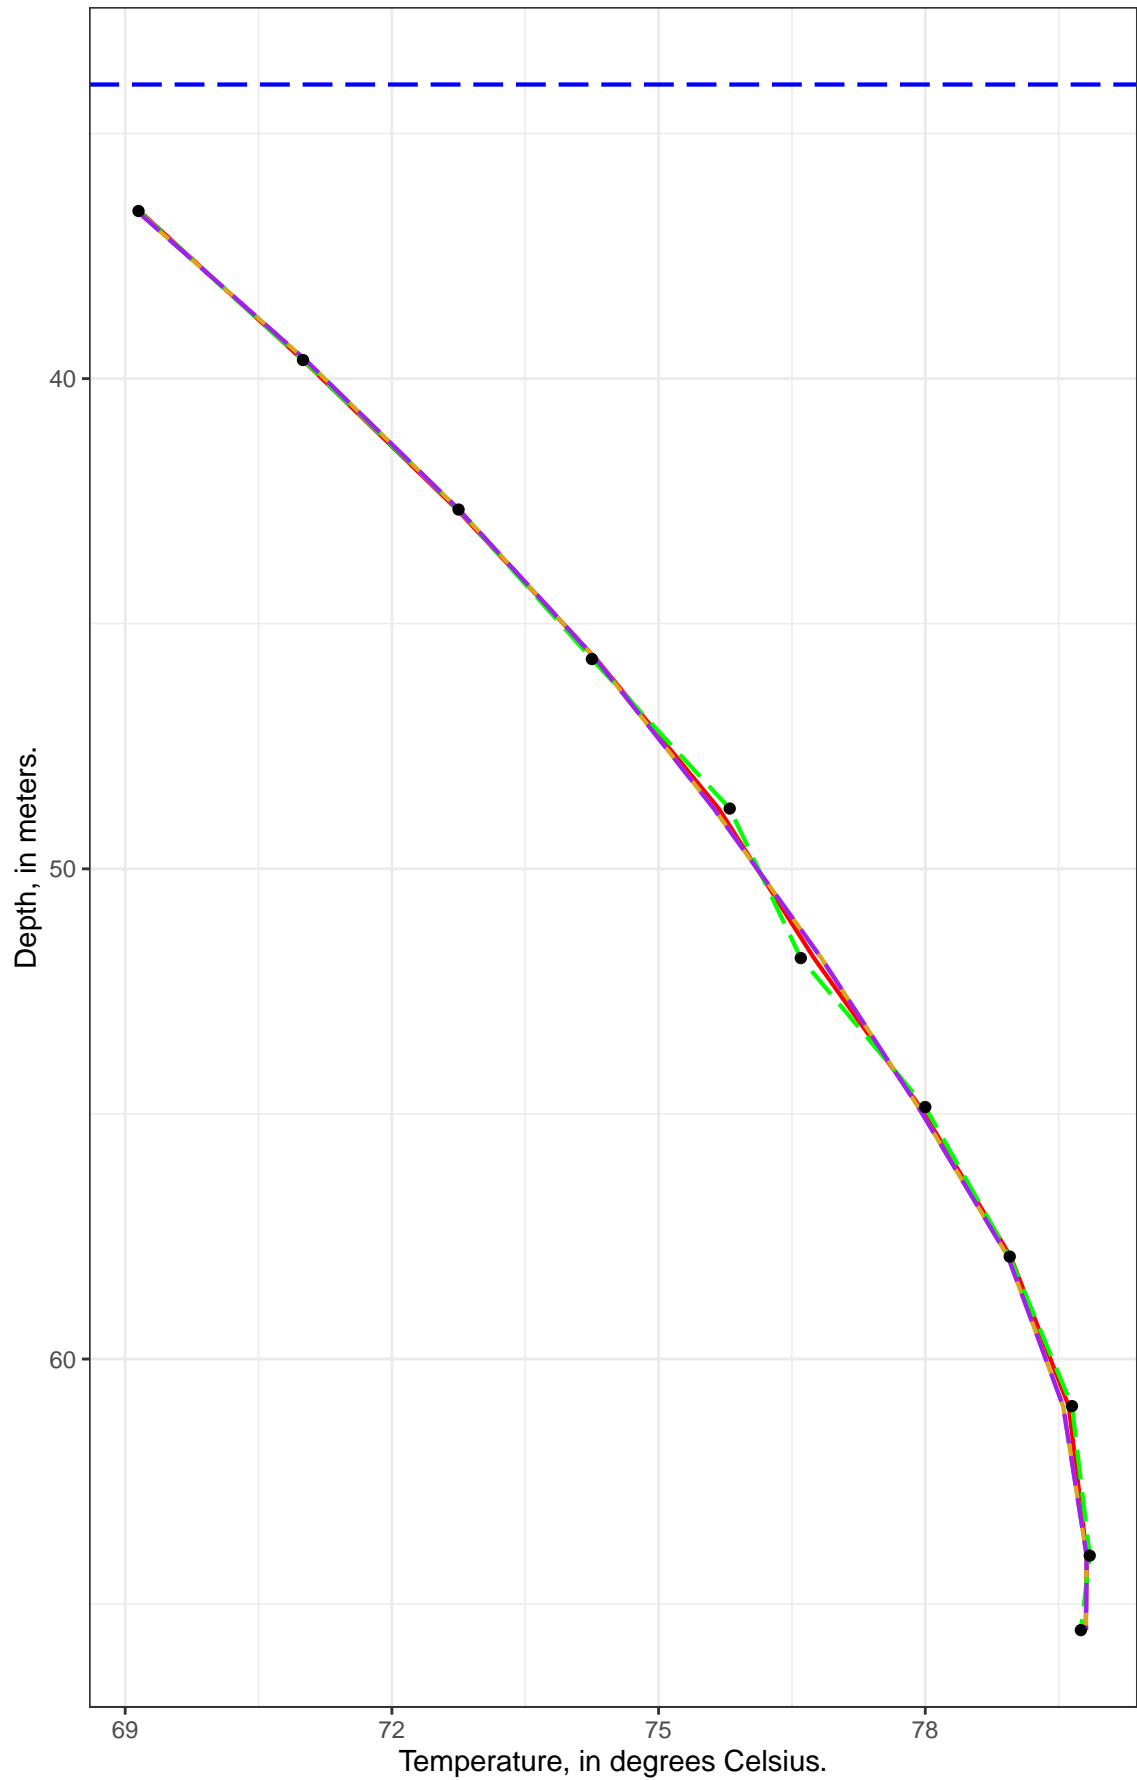

• Data • LOESS (AICC) • LOESS (constant) • LOESS (GCV) • Spline

ID: 229 [Phillips\_RS-9] First Derivative

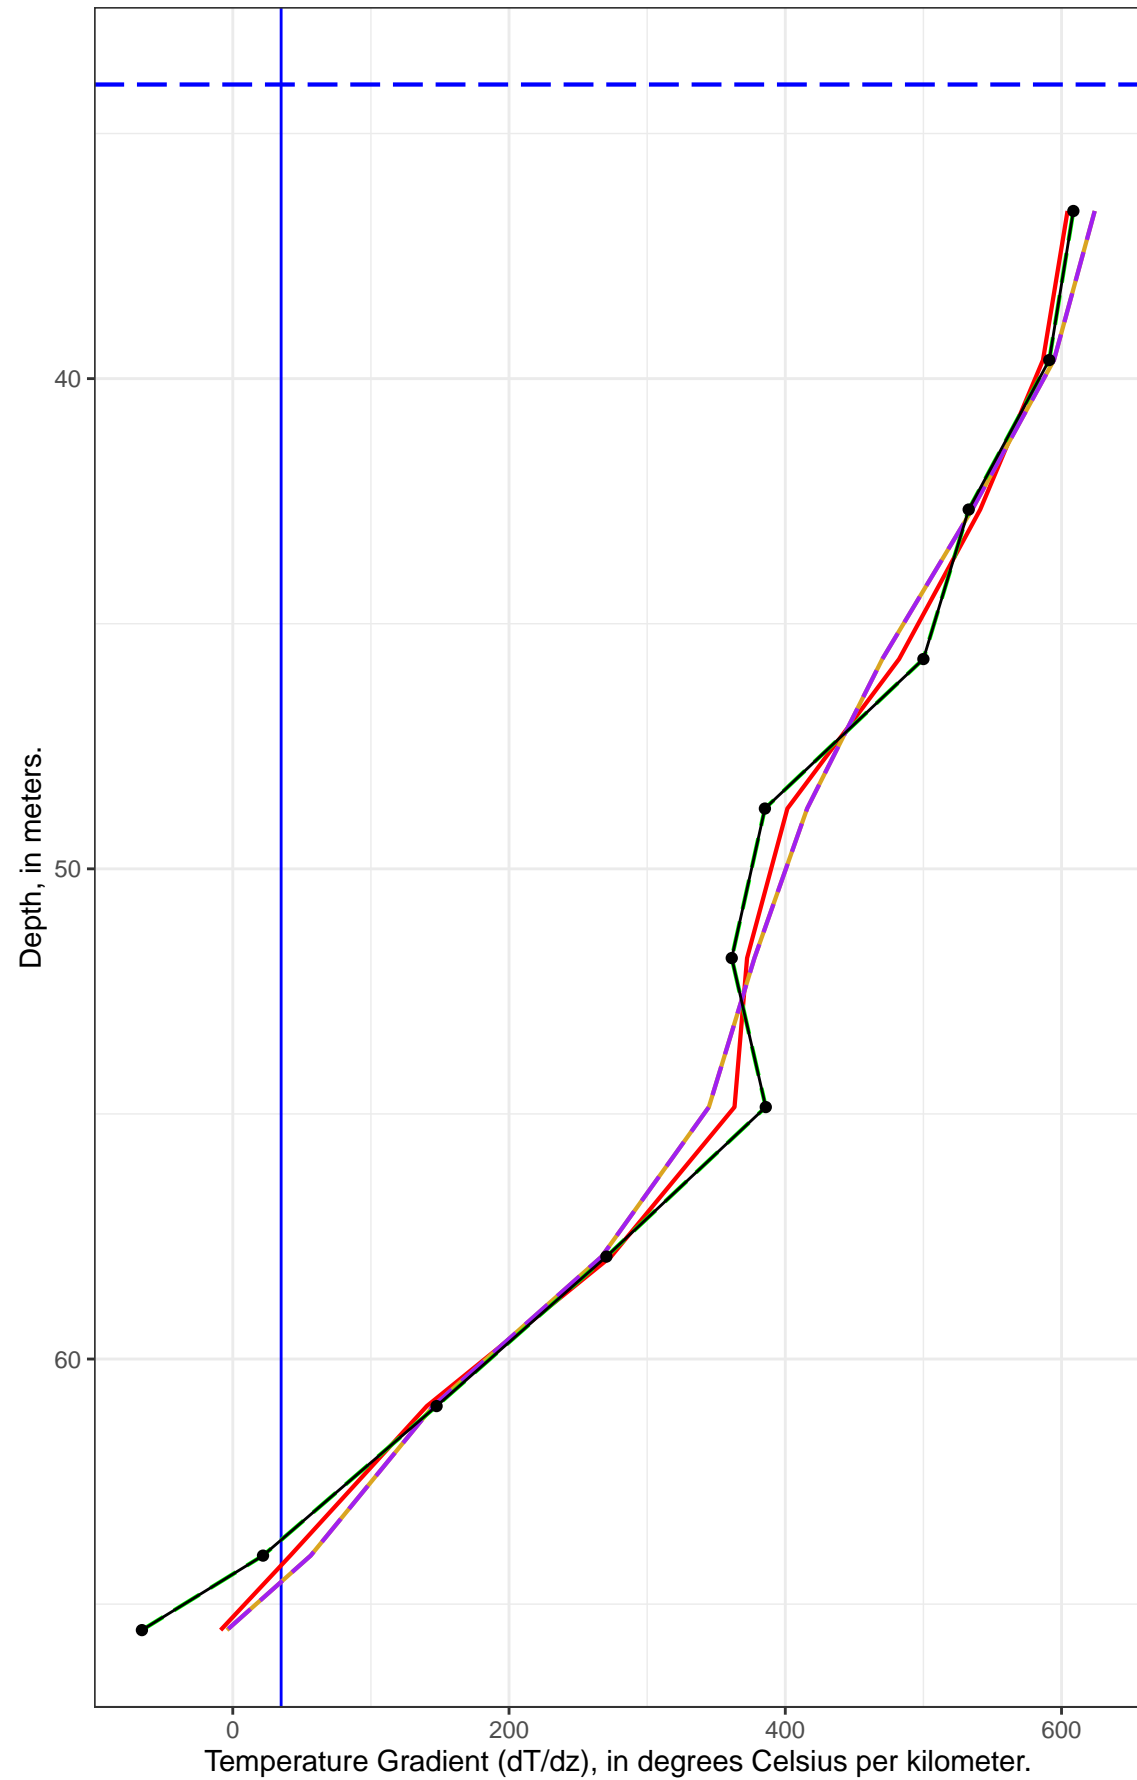

• Data • LOESS (AICC) • LOESS (constant) • LOESS (GCV) • Spline

ID: 229 [Phillips\_RS-9] Second Derivative

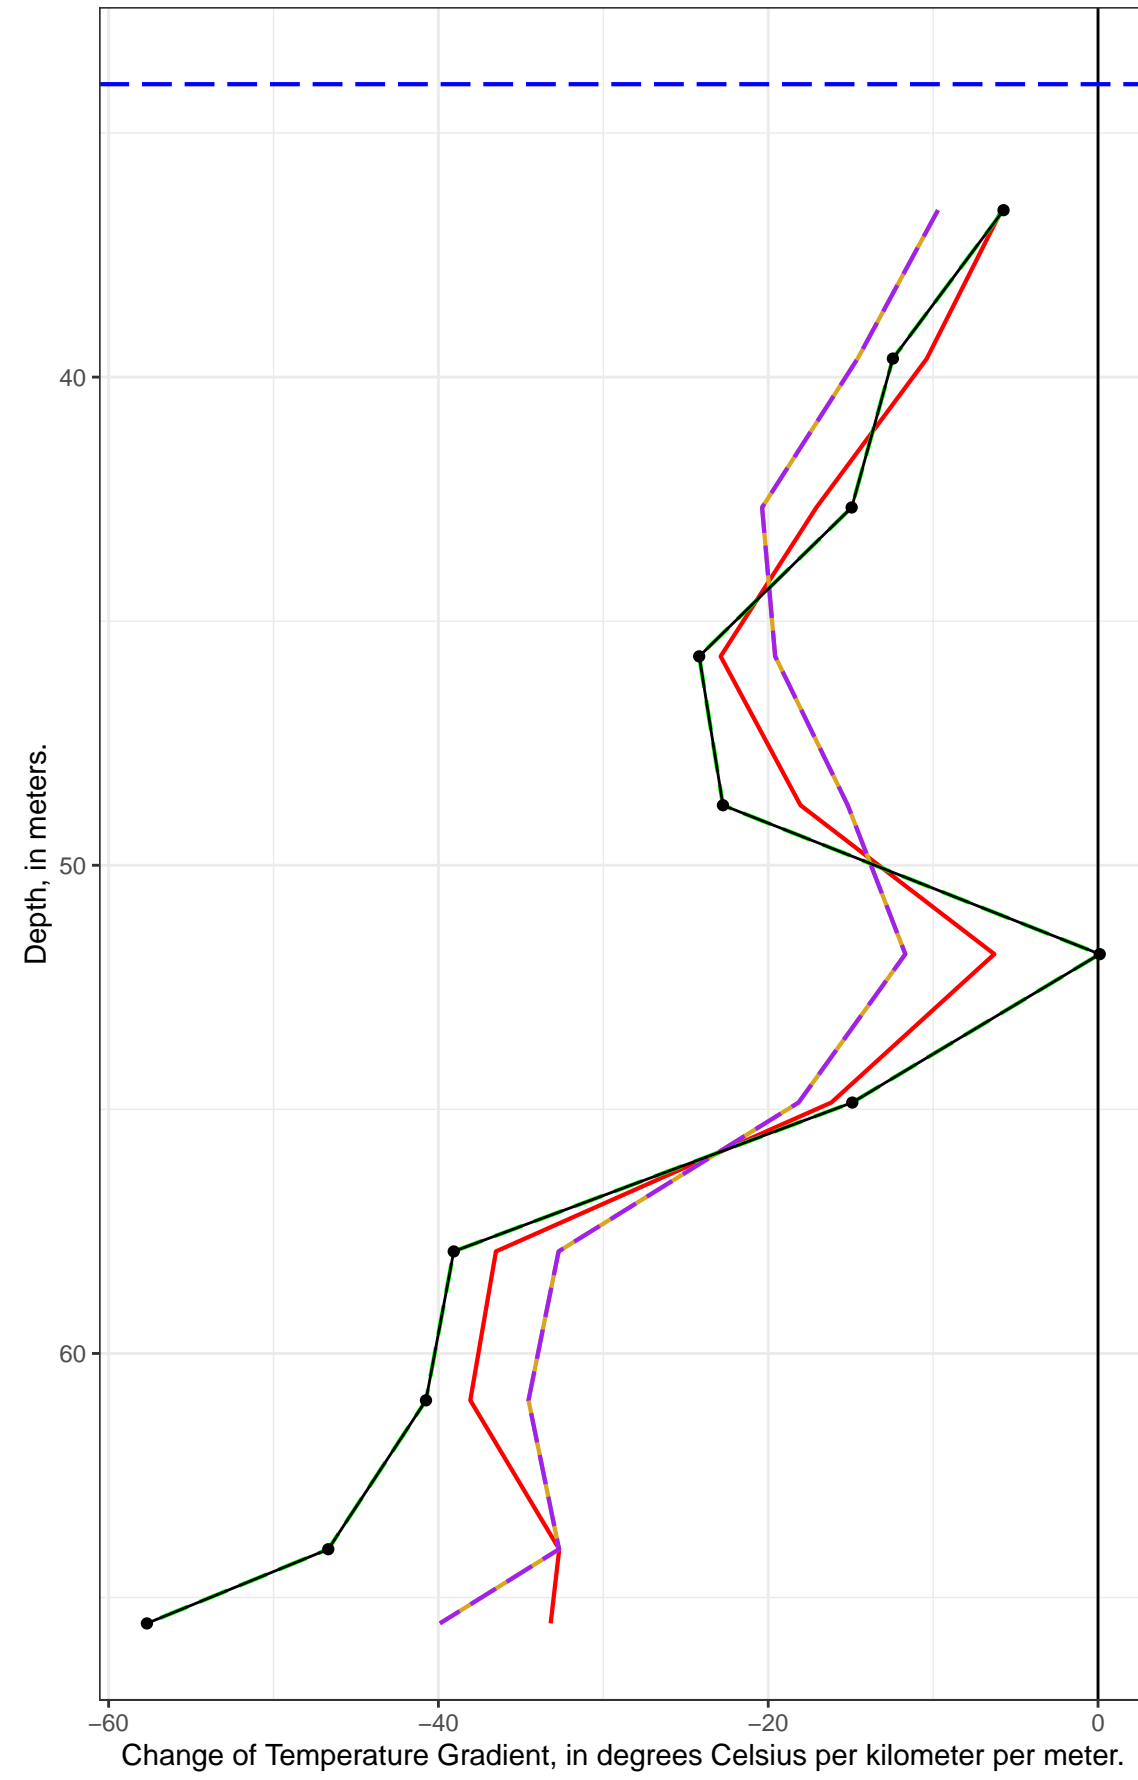

• Data • LOESS (AICC) • LOESS (constant) • LOESS (GCV) • Spline



ID: 236 [Phillips\_T-3] Smoothed Profile

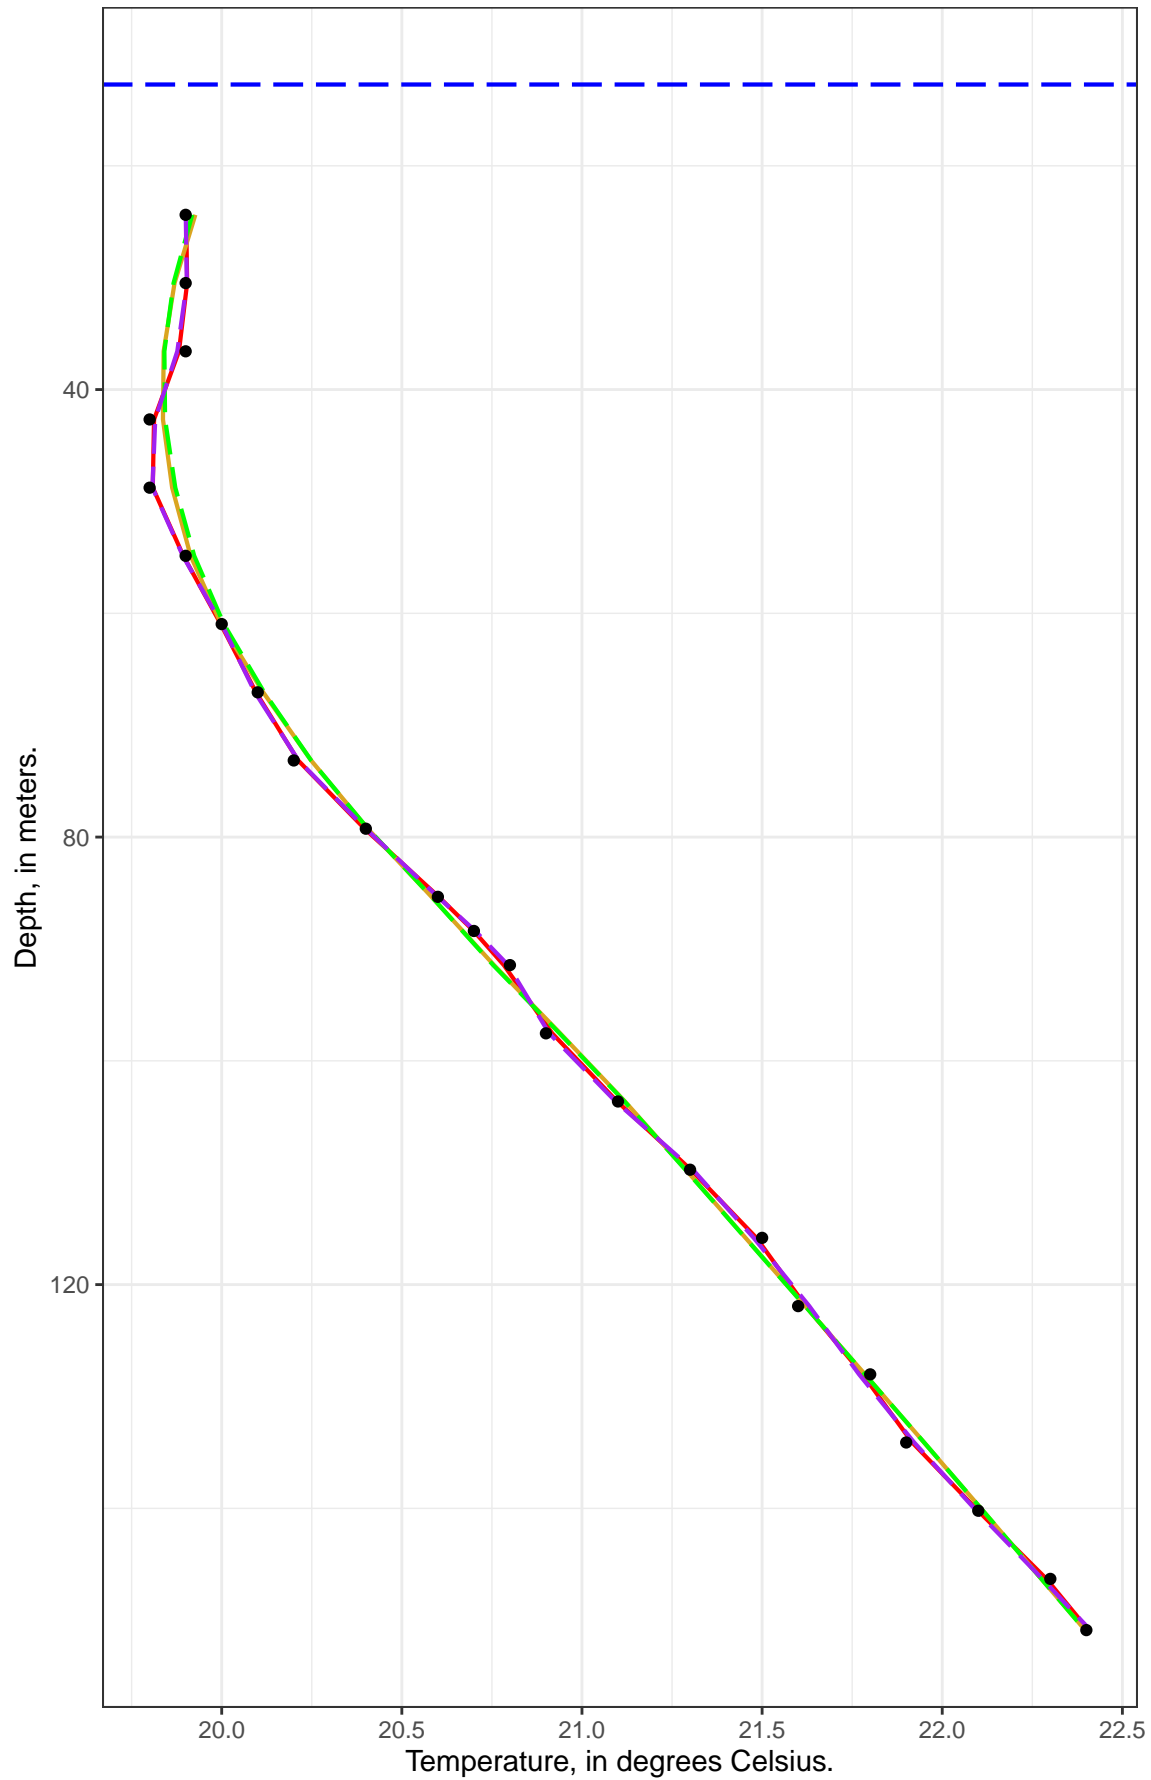

ID: 236 [Phillips\_T-3] First Derivative

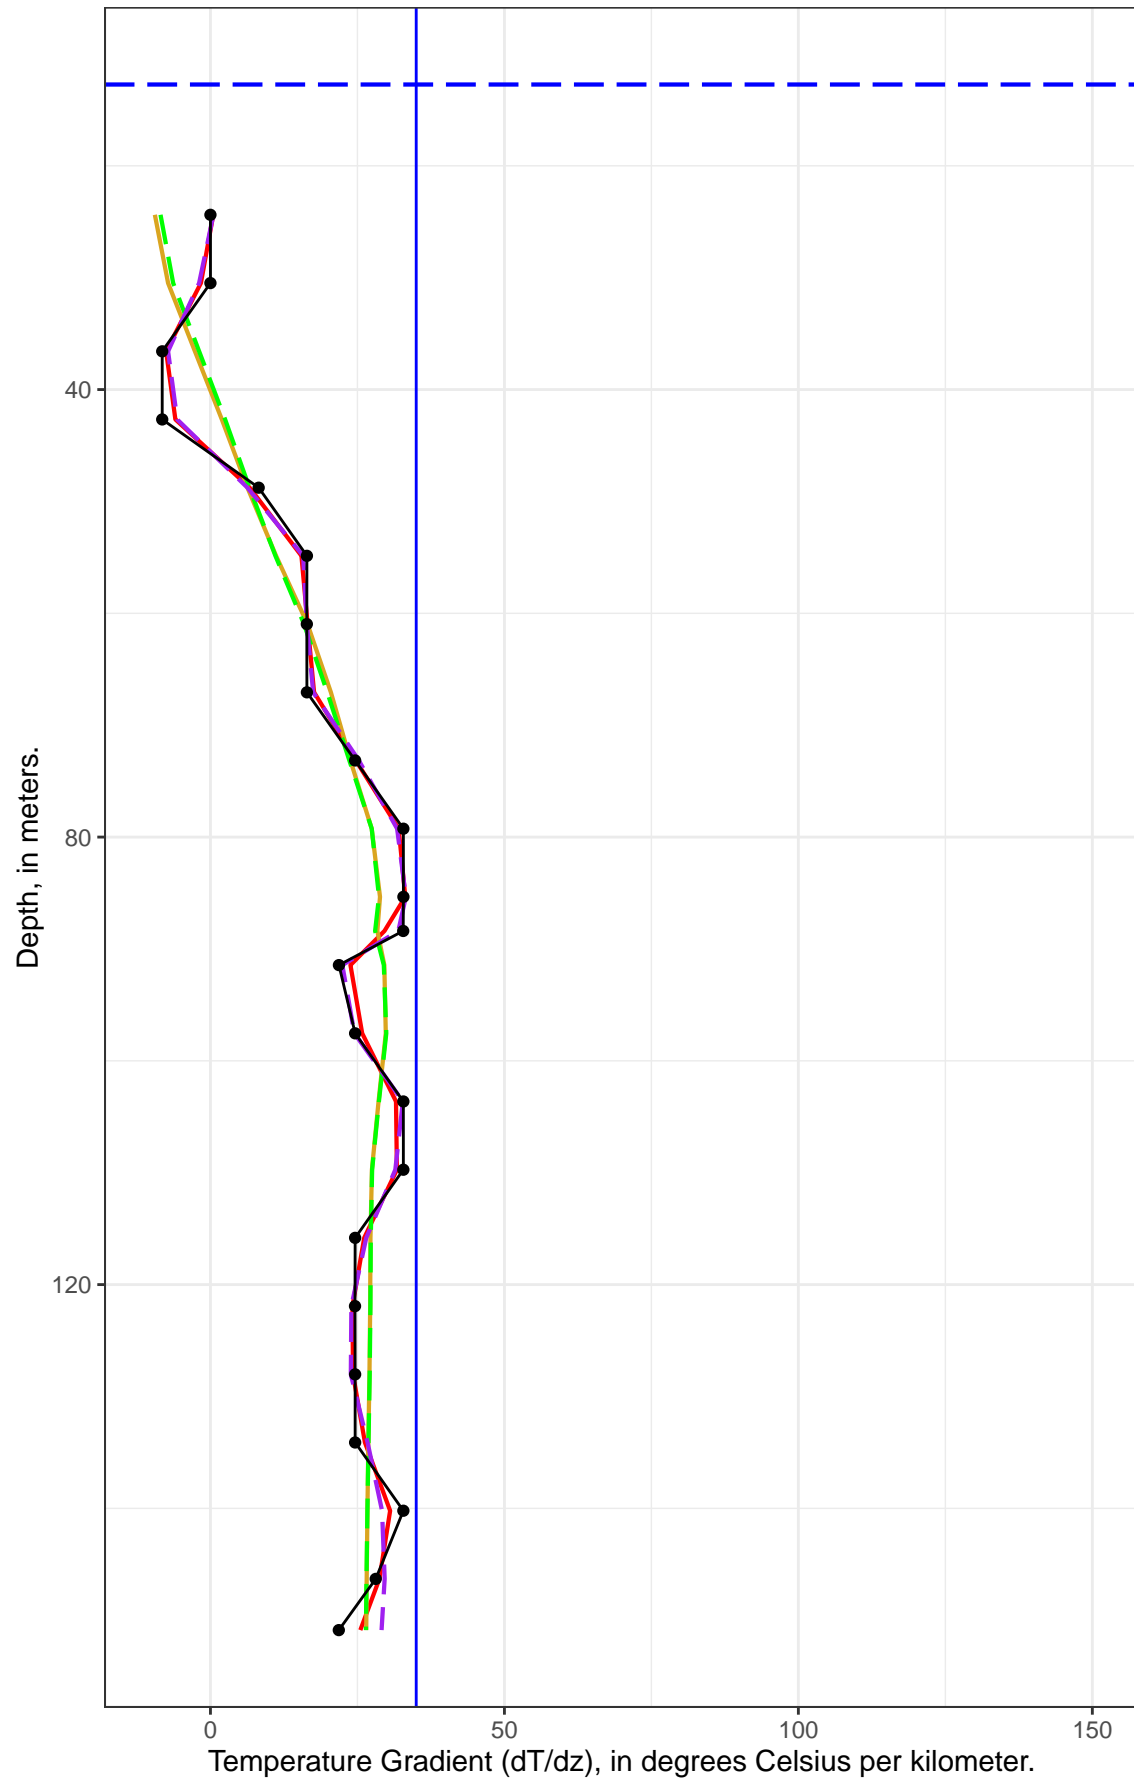

ID: 236 [Phillips\_T-3] Second Derivative

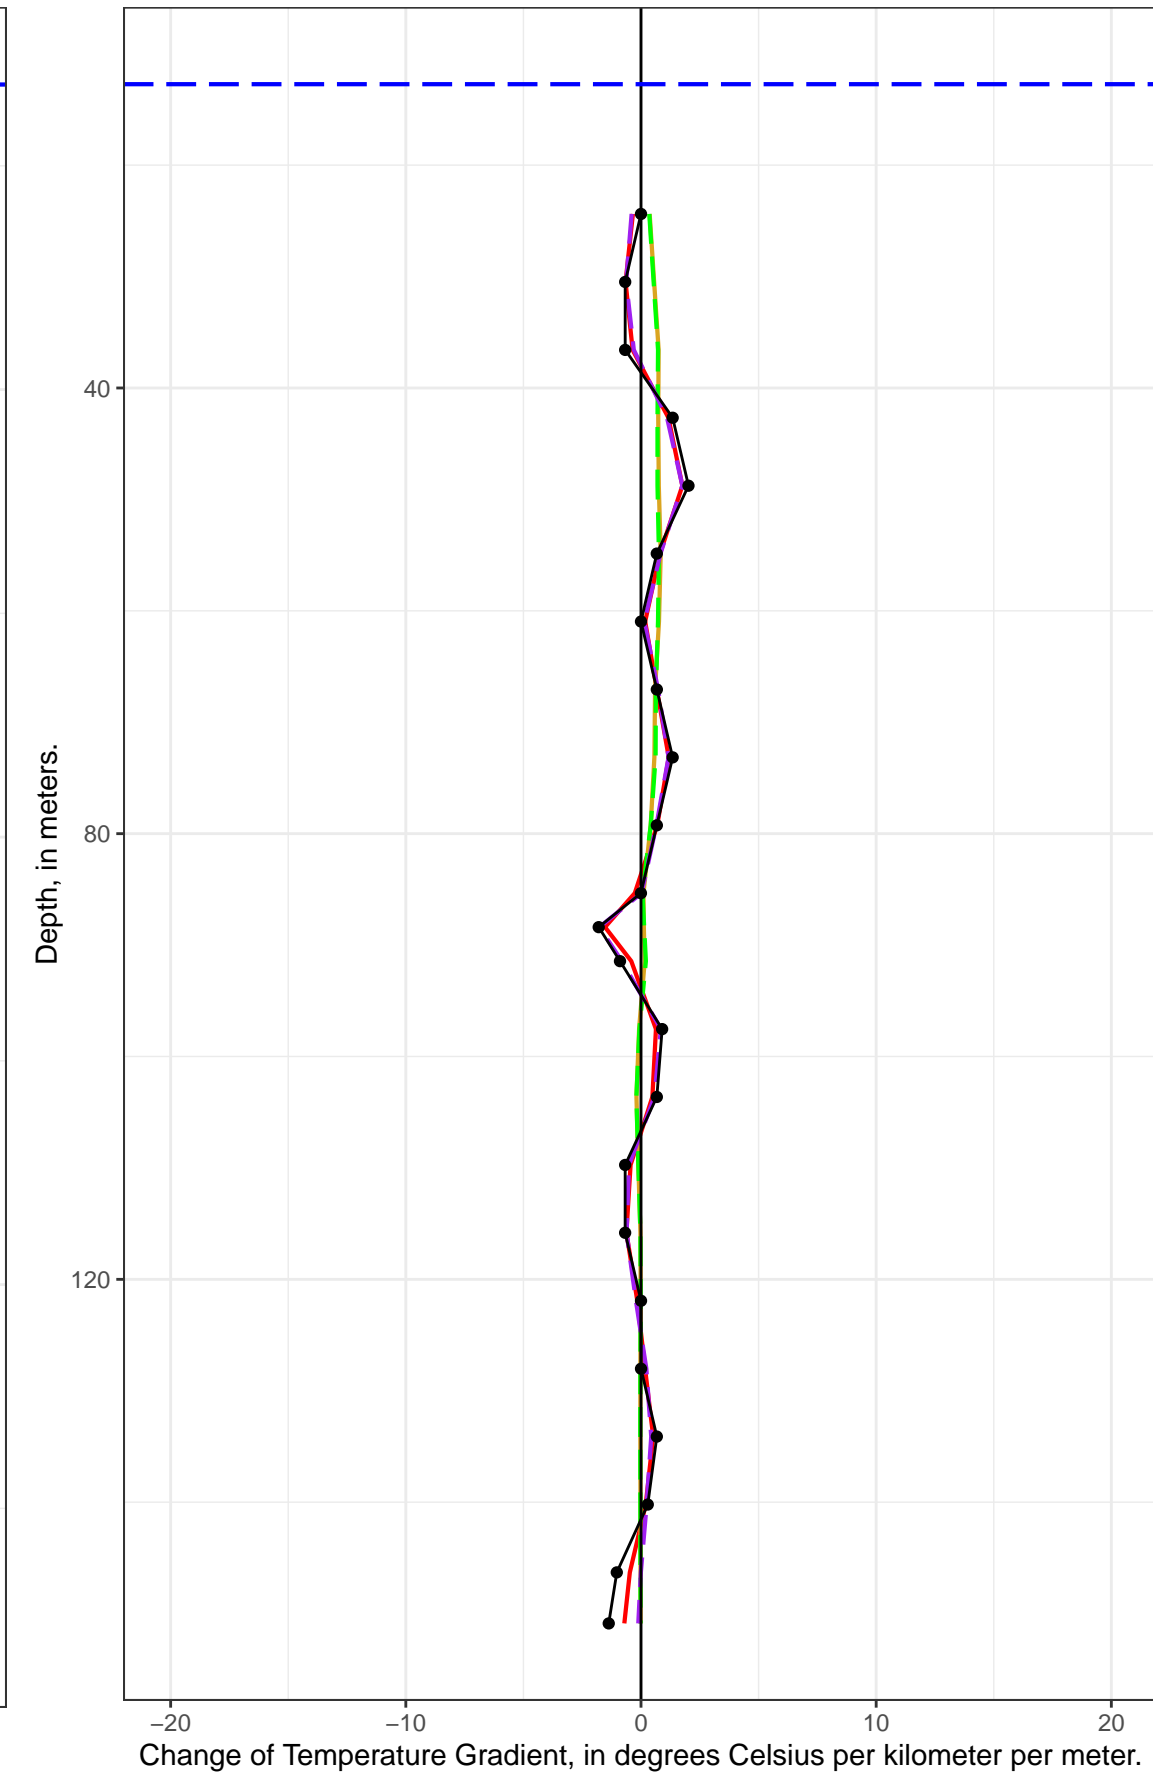

• Data — LOESS (AICC) — LOESS (constant) — LOESS (GCV) — Spline

• Data — LOESS (AICC) — LOESS (constant) — LOESS (GCV) — Spline

• Data — LOESS (AICC) — LOESS (constant) — LOESS (GCV) — Spline

ID: 241 [Phillips\_T-9] Smoothed Profile

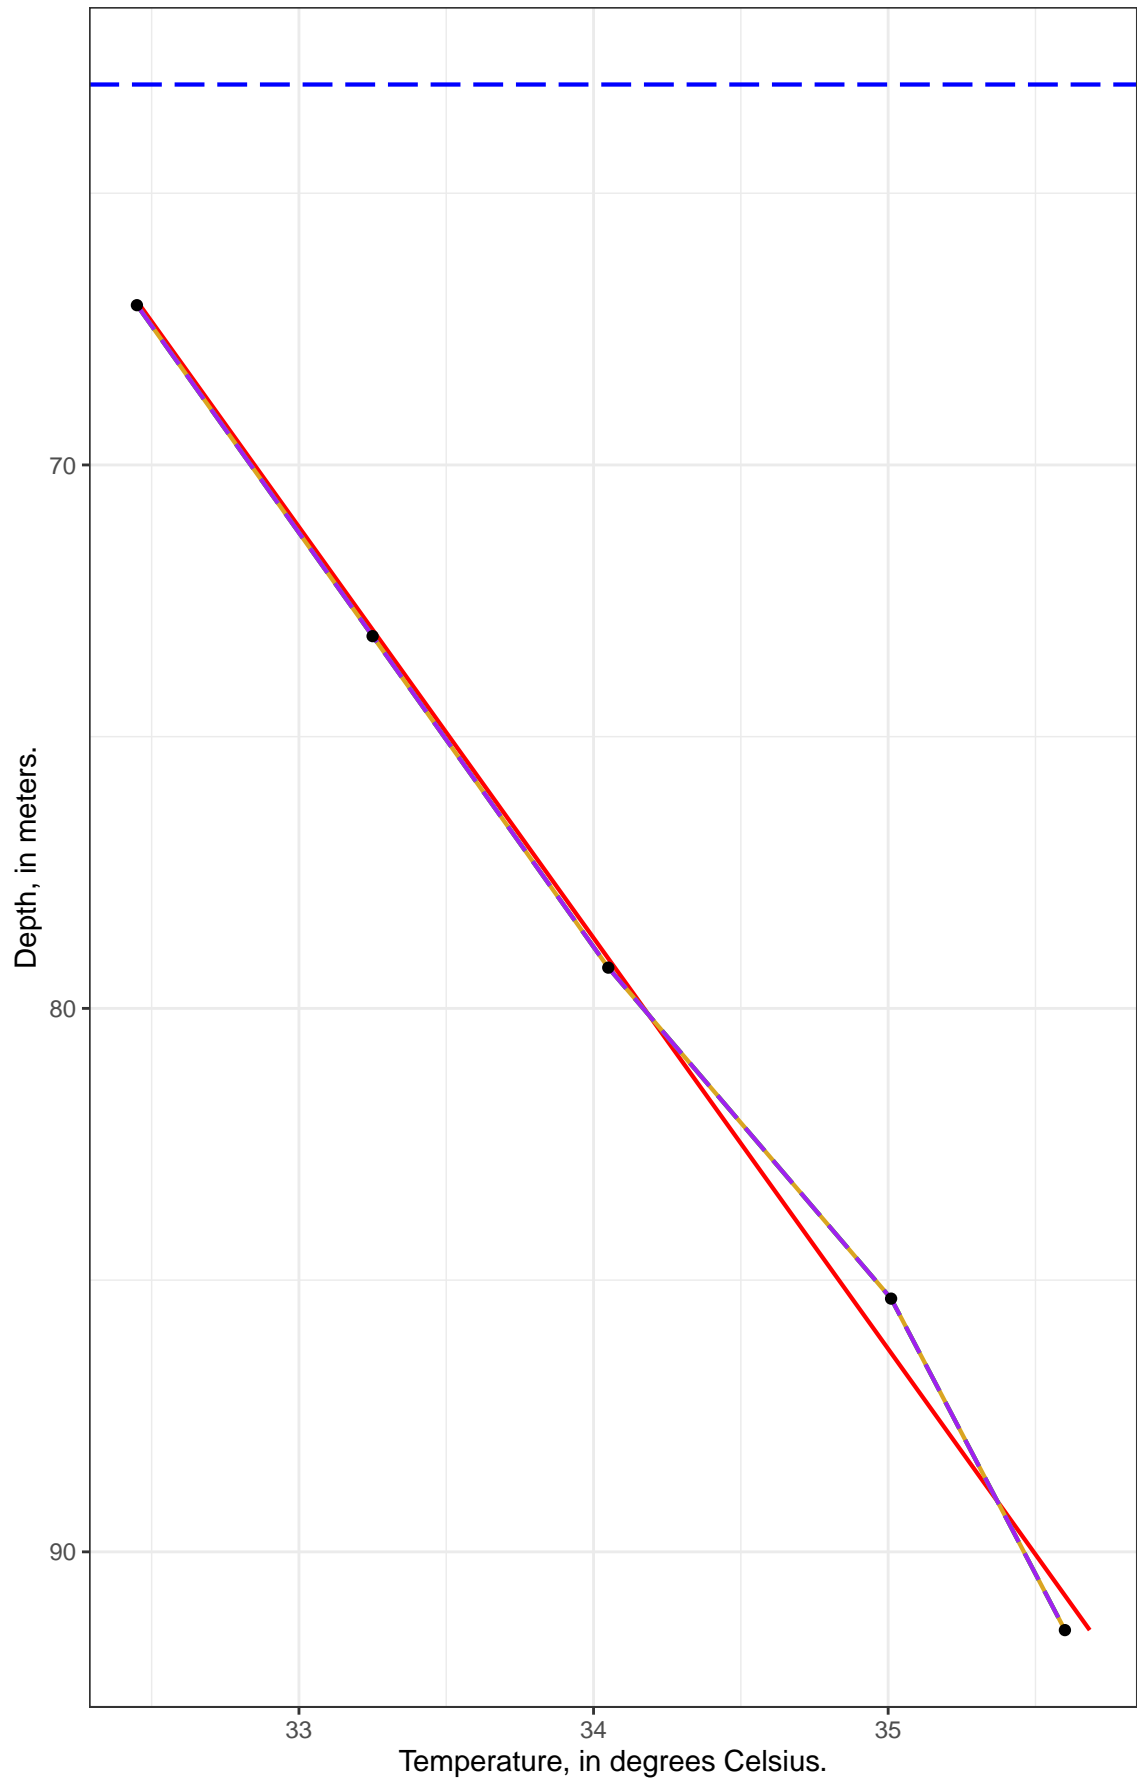

• Data — LOESS (AICC) — LOESS (constant) — LOESS (GCV) — Spline

ID: 241 [Phillips\_T-9] First Derivative

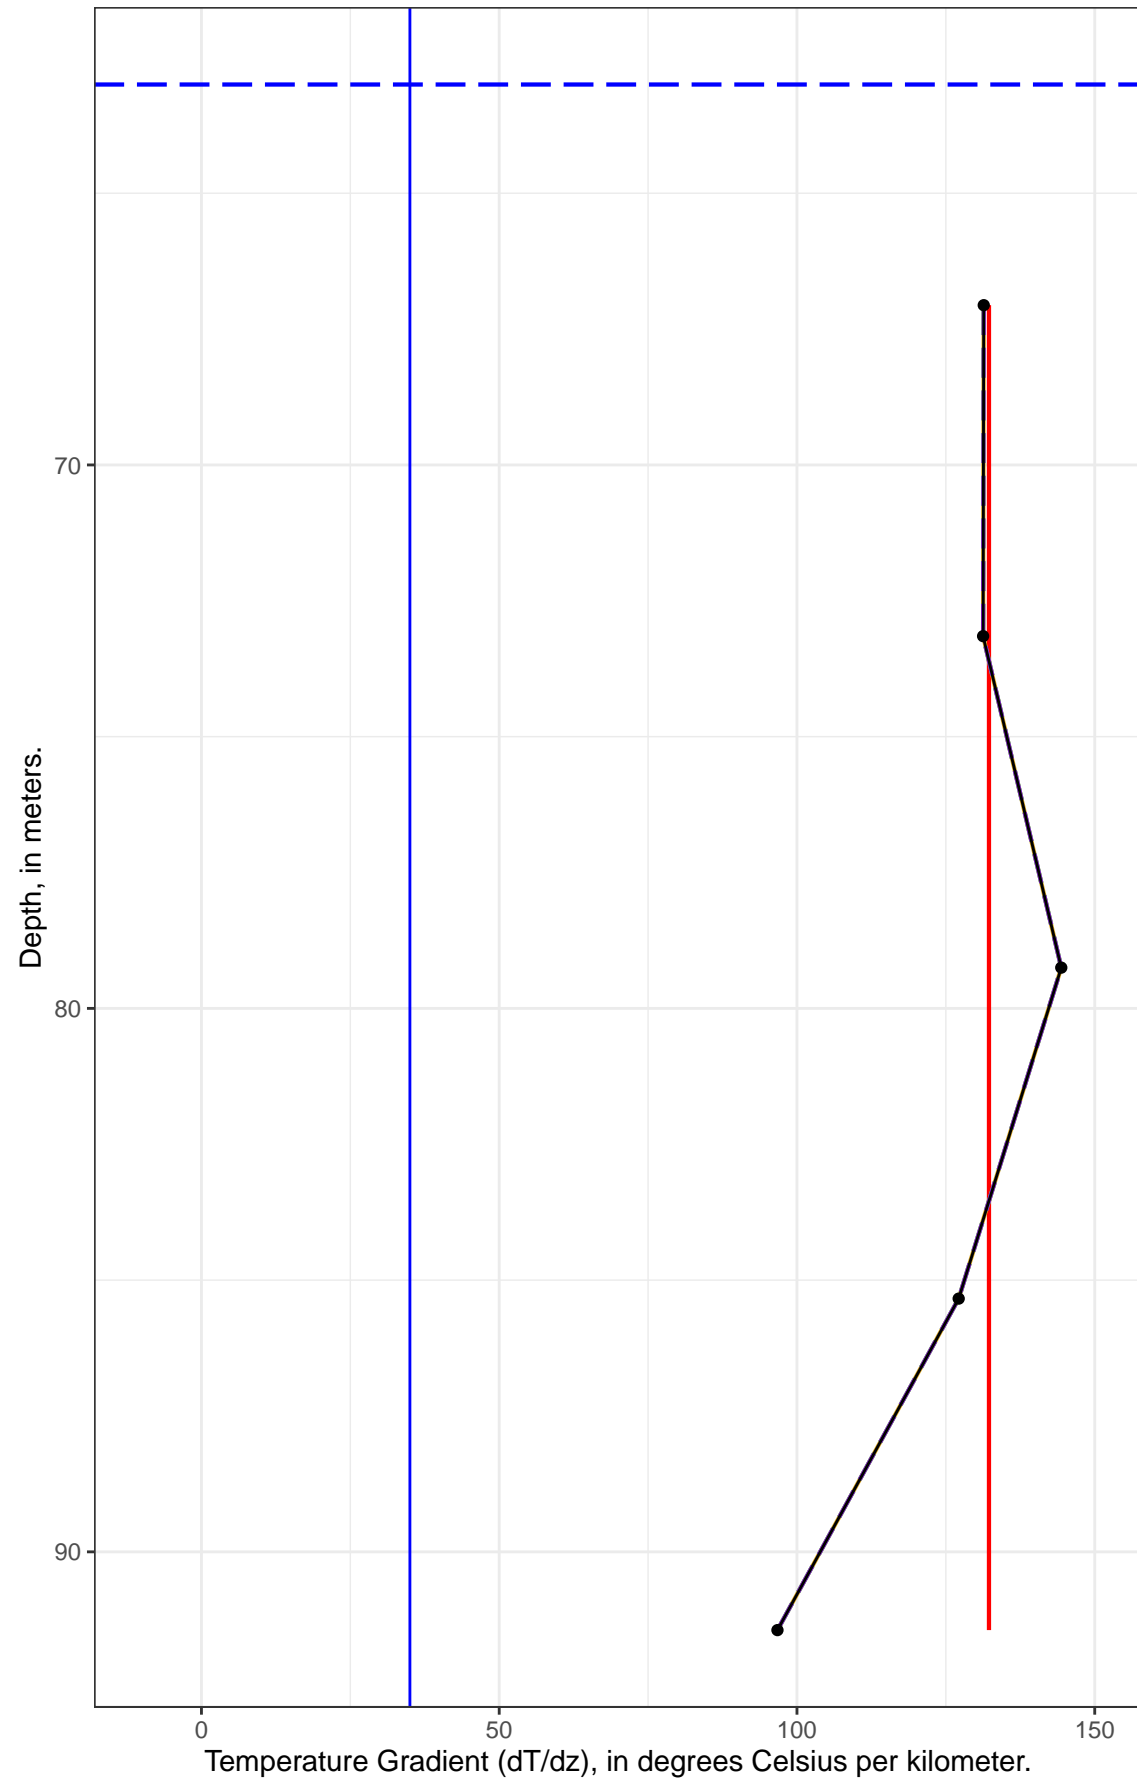

• Data — LOESS (AICC) — LOESS (constant) — LOESS (GCV) — Spline

ID: 241 [Phillips\_T-9] Second Derivative

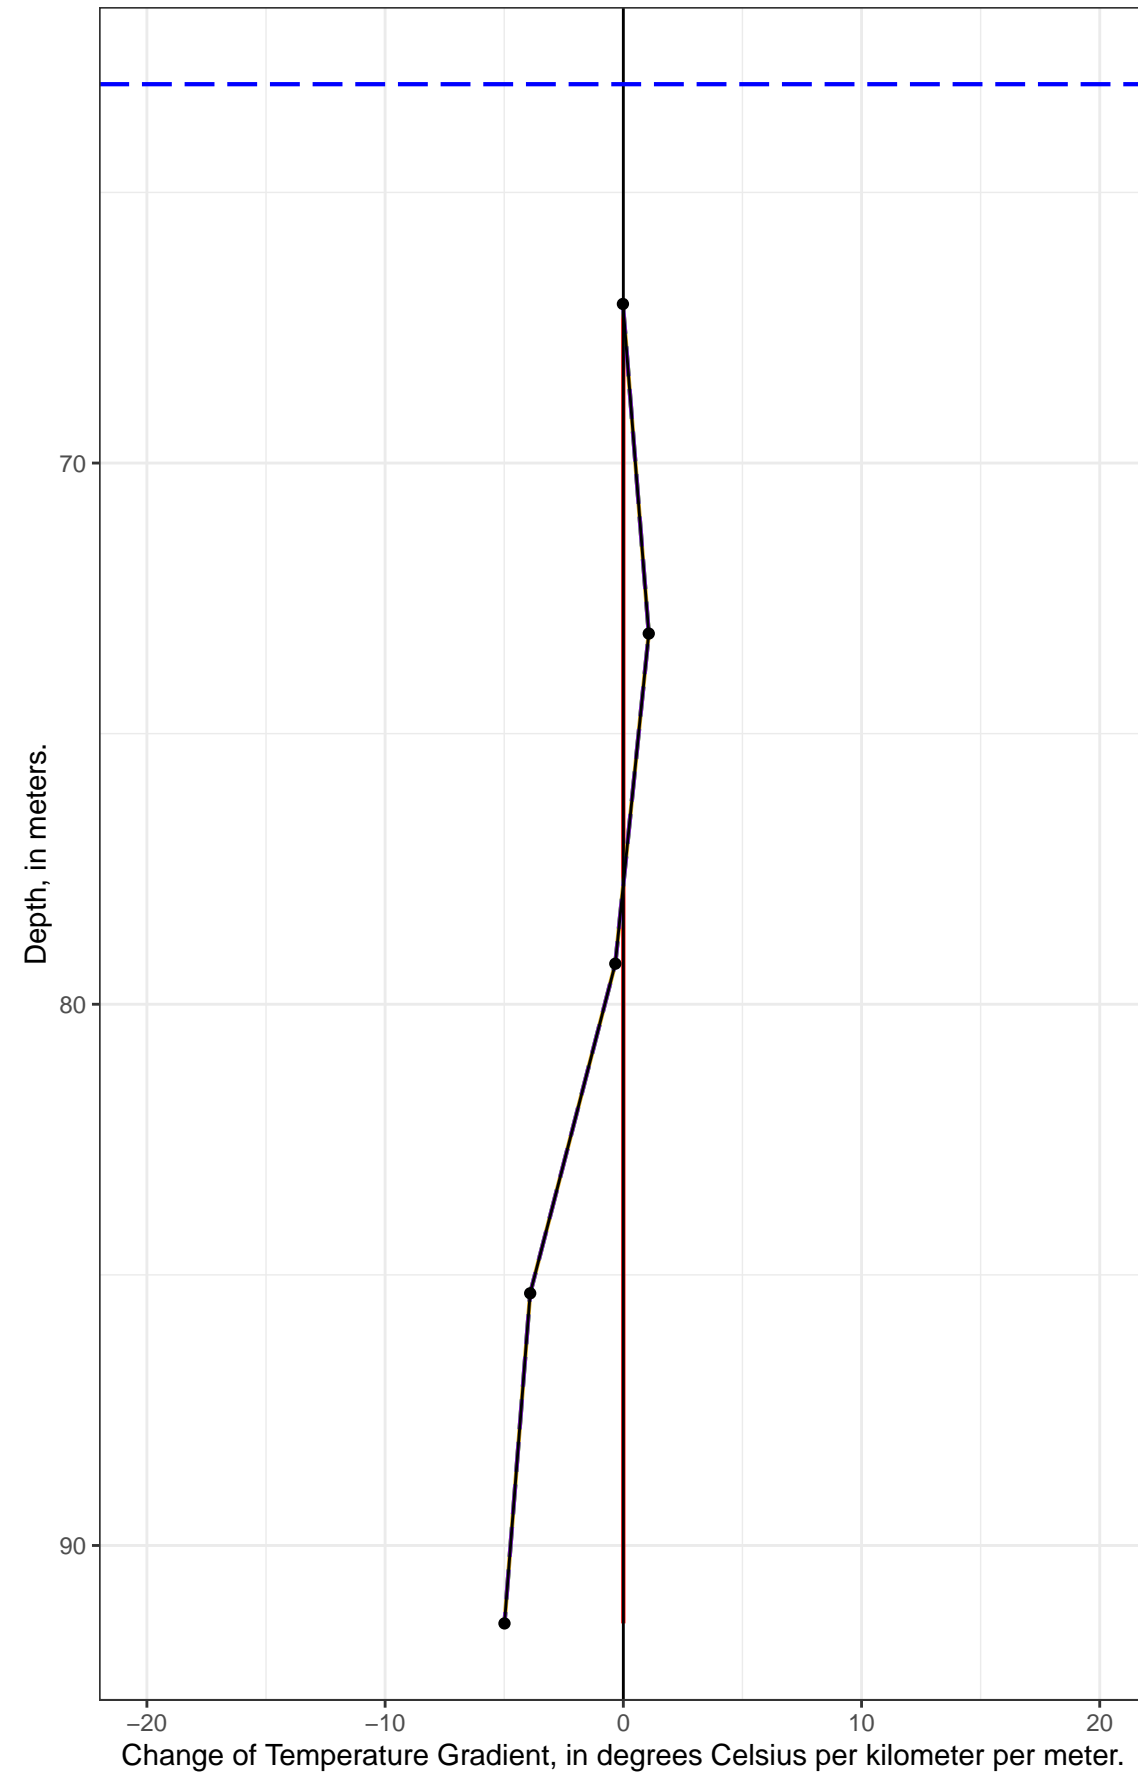

• Data — LOESS (AICC) — LOESS (constant) — LOESS (GCV) — Spline

ID: 243 [ST-10] Smoothed Profile

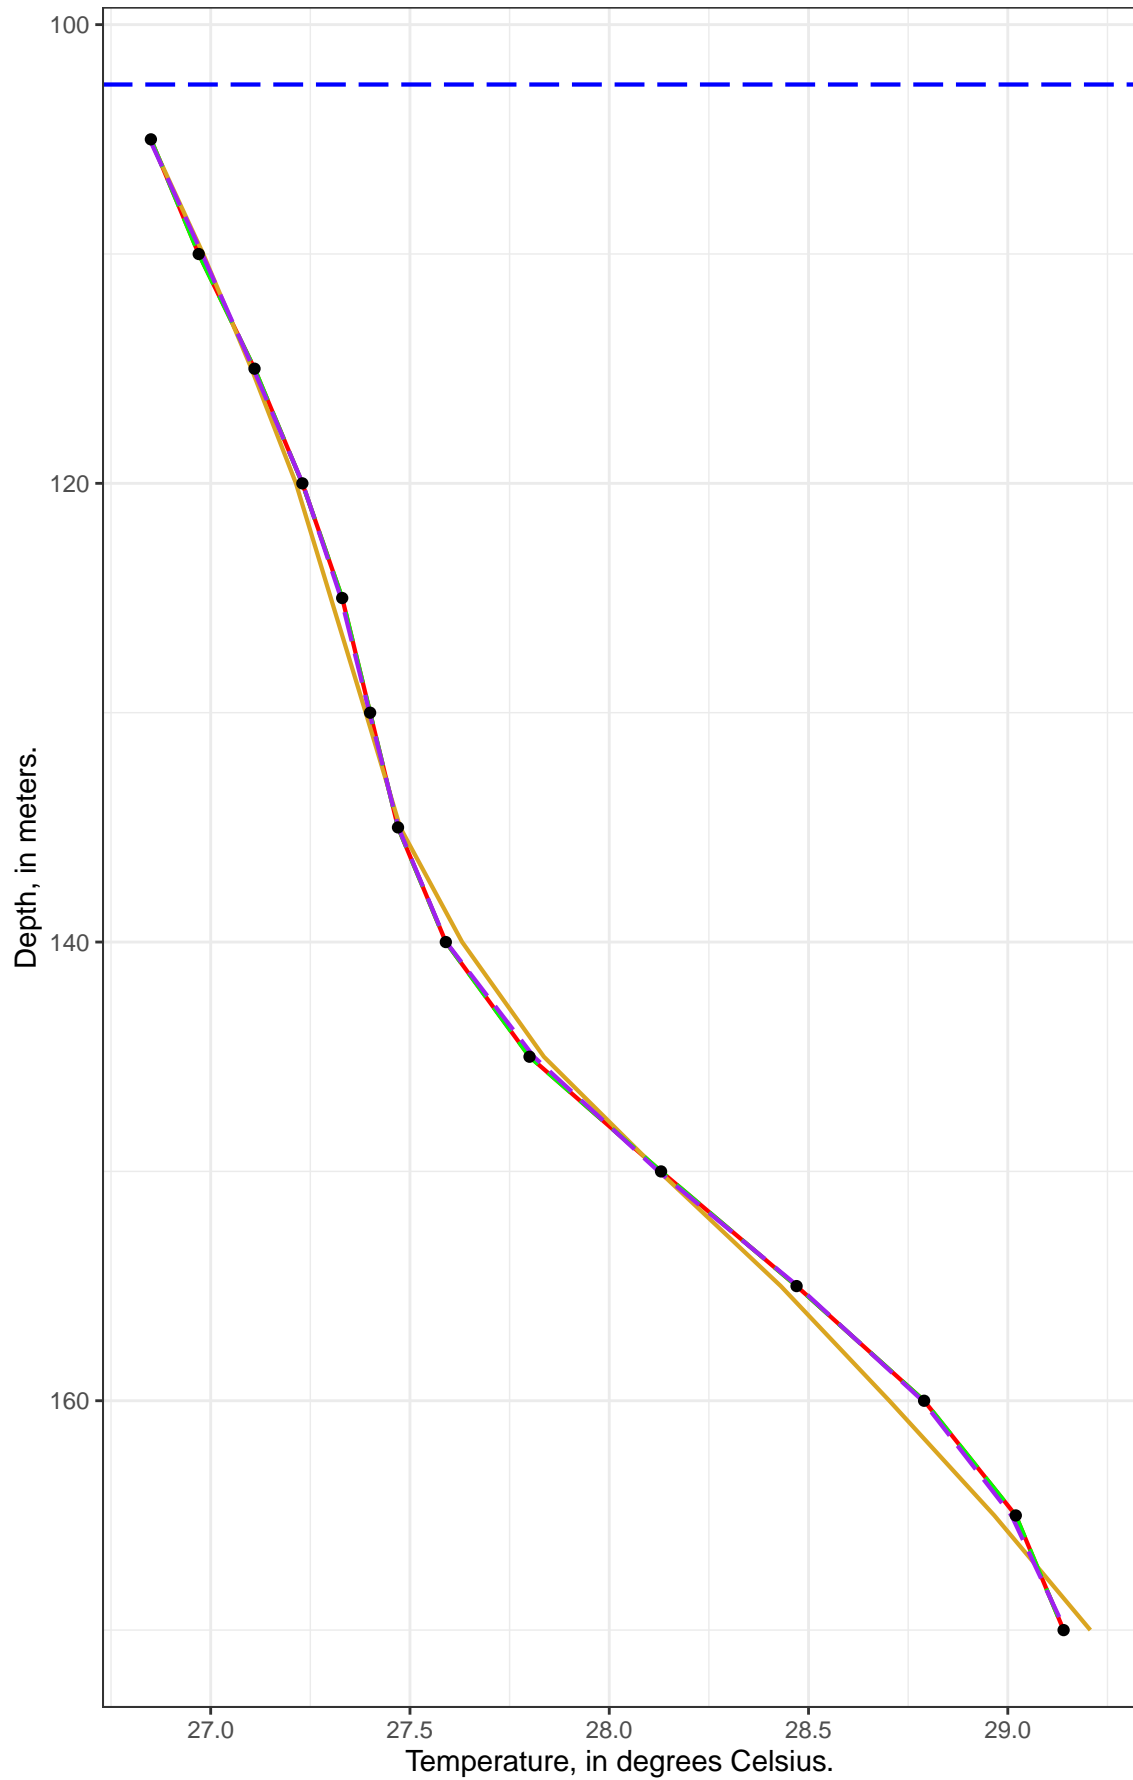

ID: 243 [ST-10] First Derivative

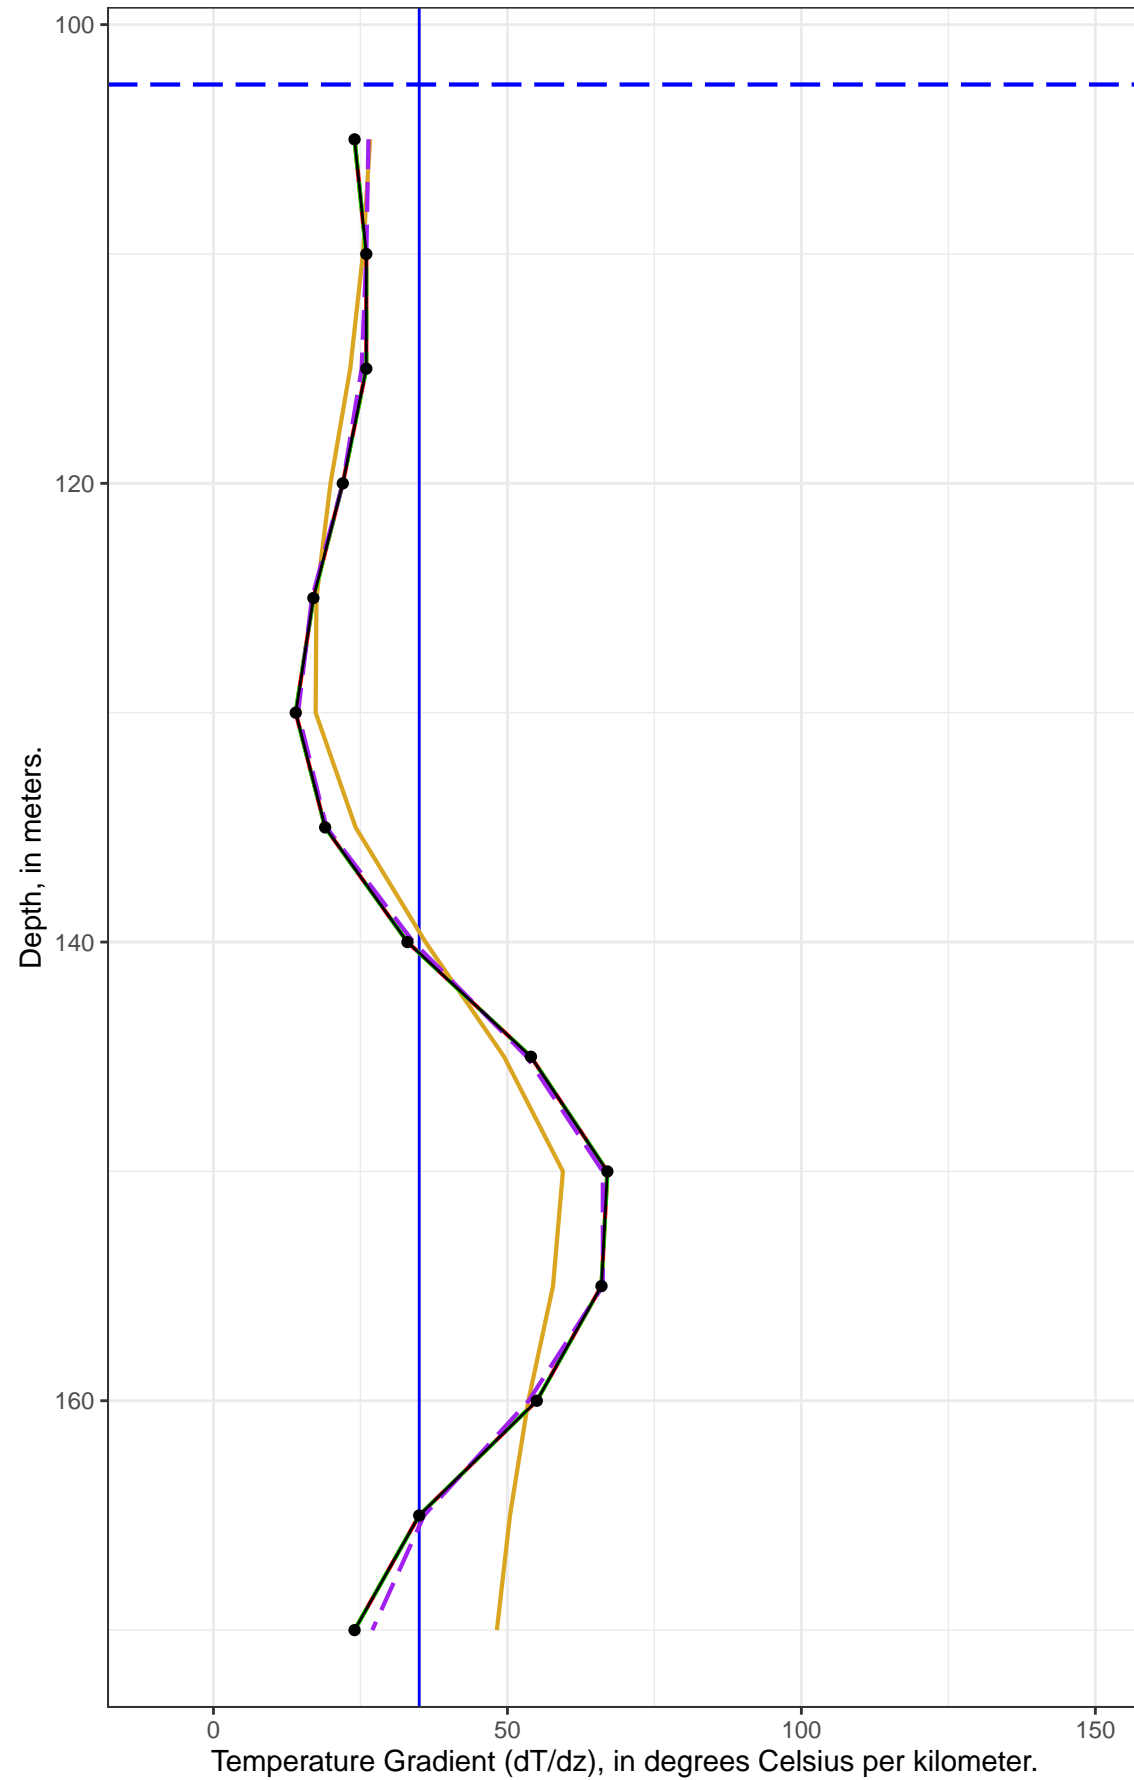

ID: 243 [ST-10] Second Derivative

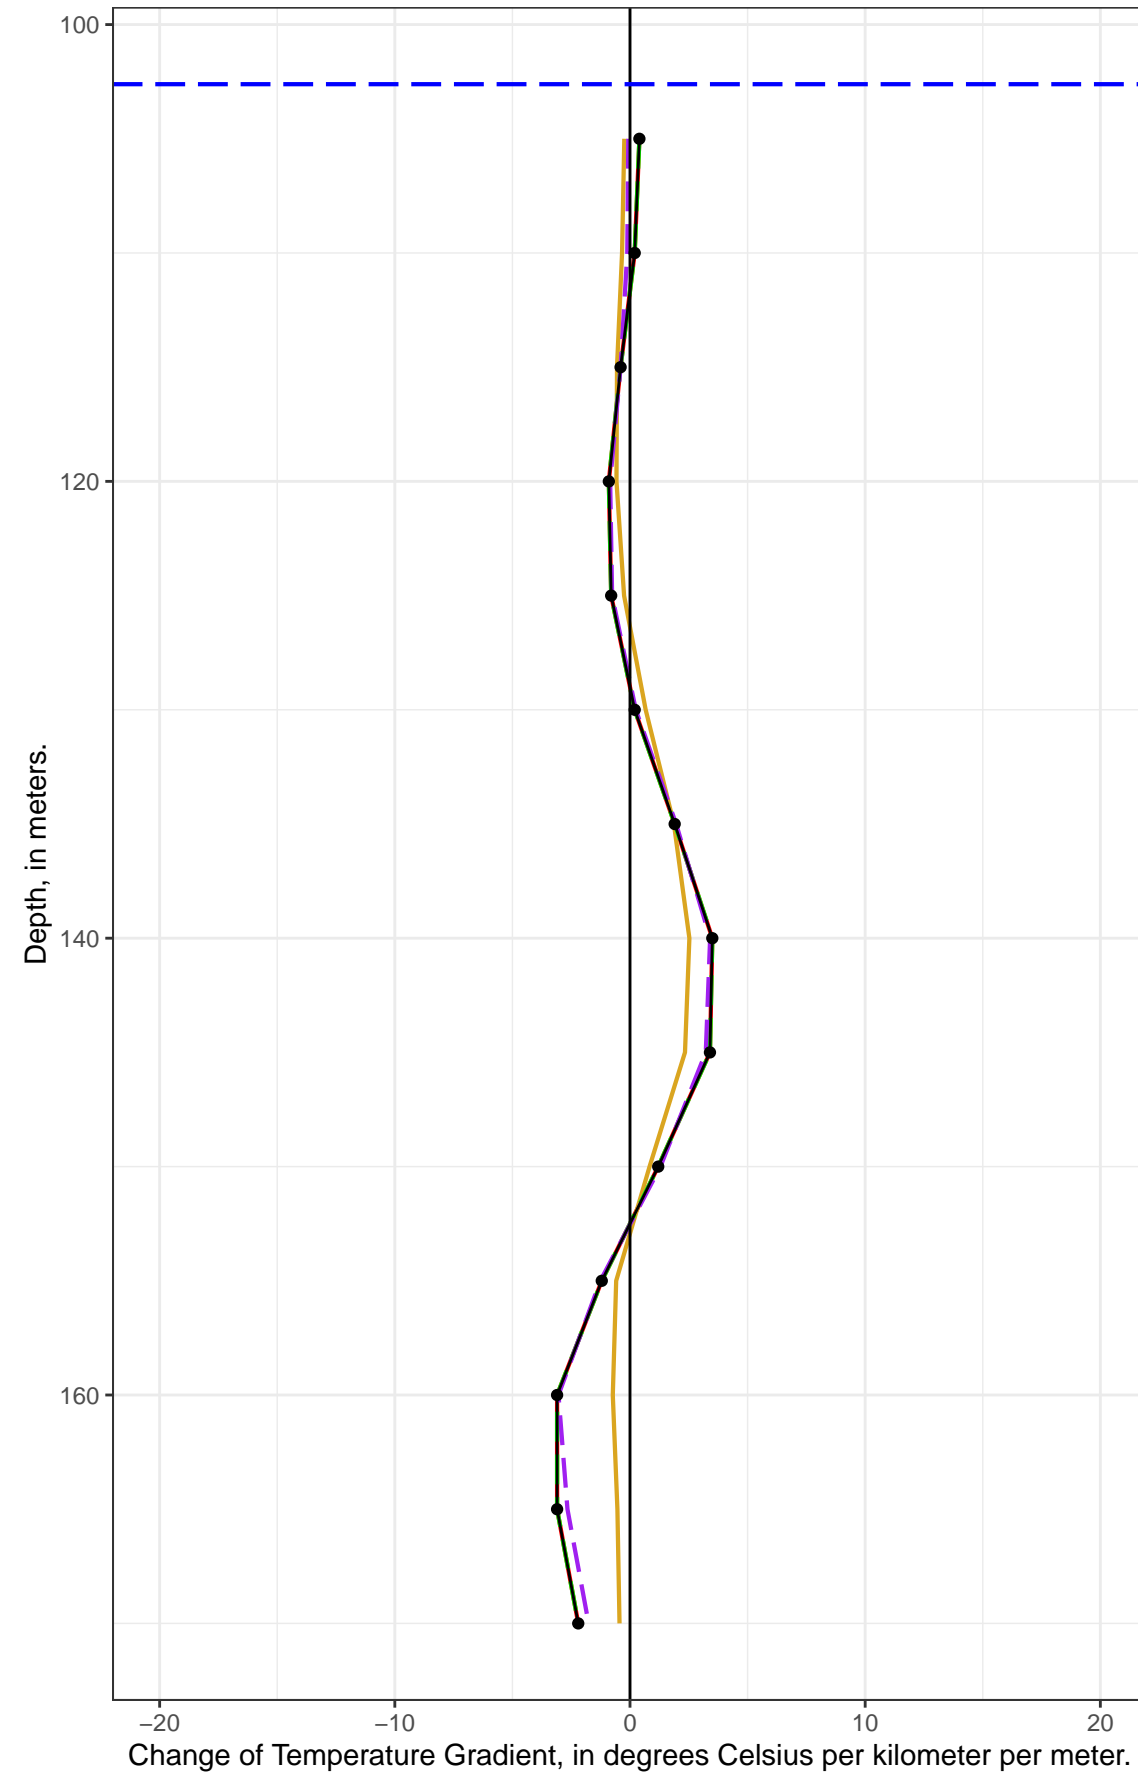

• Data — LOESS (AICC) — LOESS (constant) — LOESS (GCV) — Spline

• Data — LOESS (AICC) — LOESS (constant) — LOESS (GCV) — Spline

• Data — LOESS (AICC) — LOESS (constant) — LOESS (GCV) — Spline

ID: 244 [ST-12] Smoothed Profile

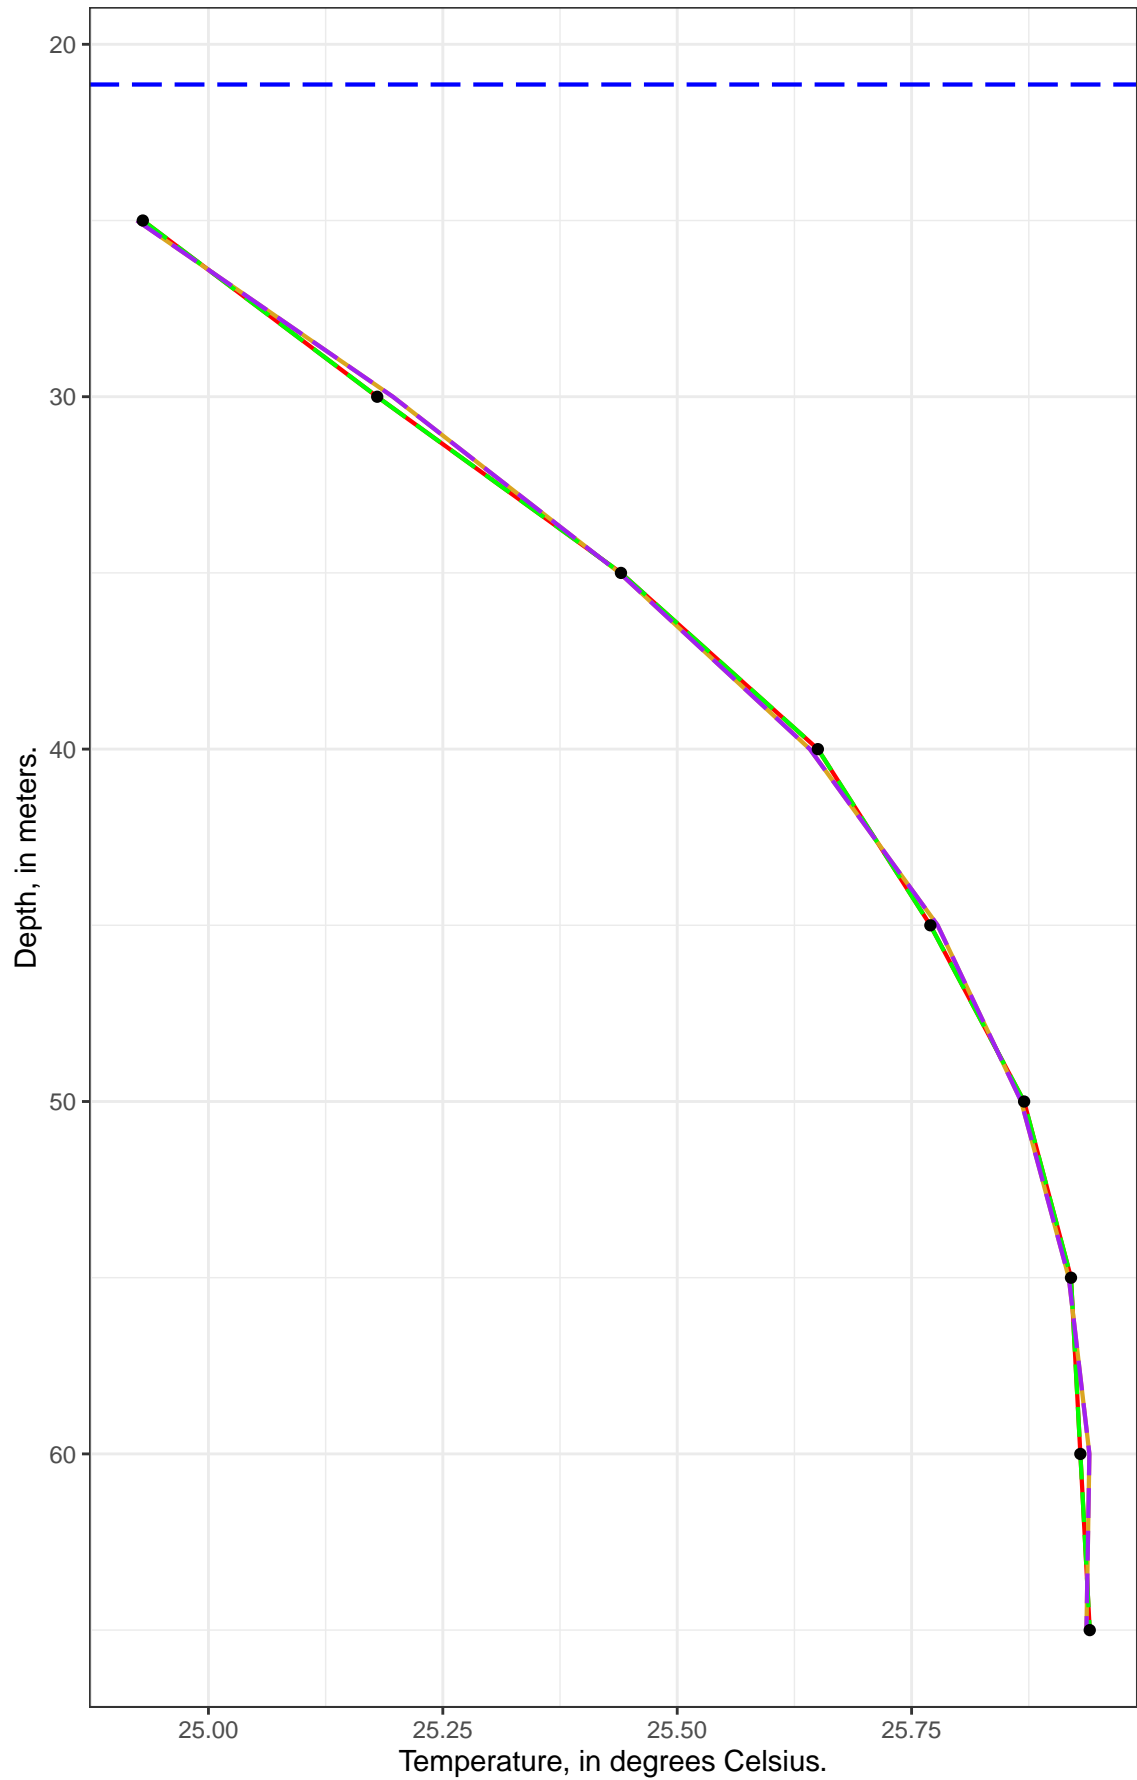

ID: 244 [ST-12] First Derivative

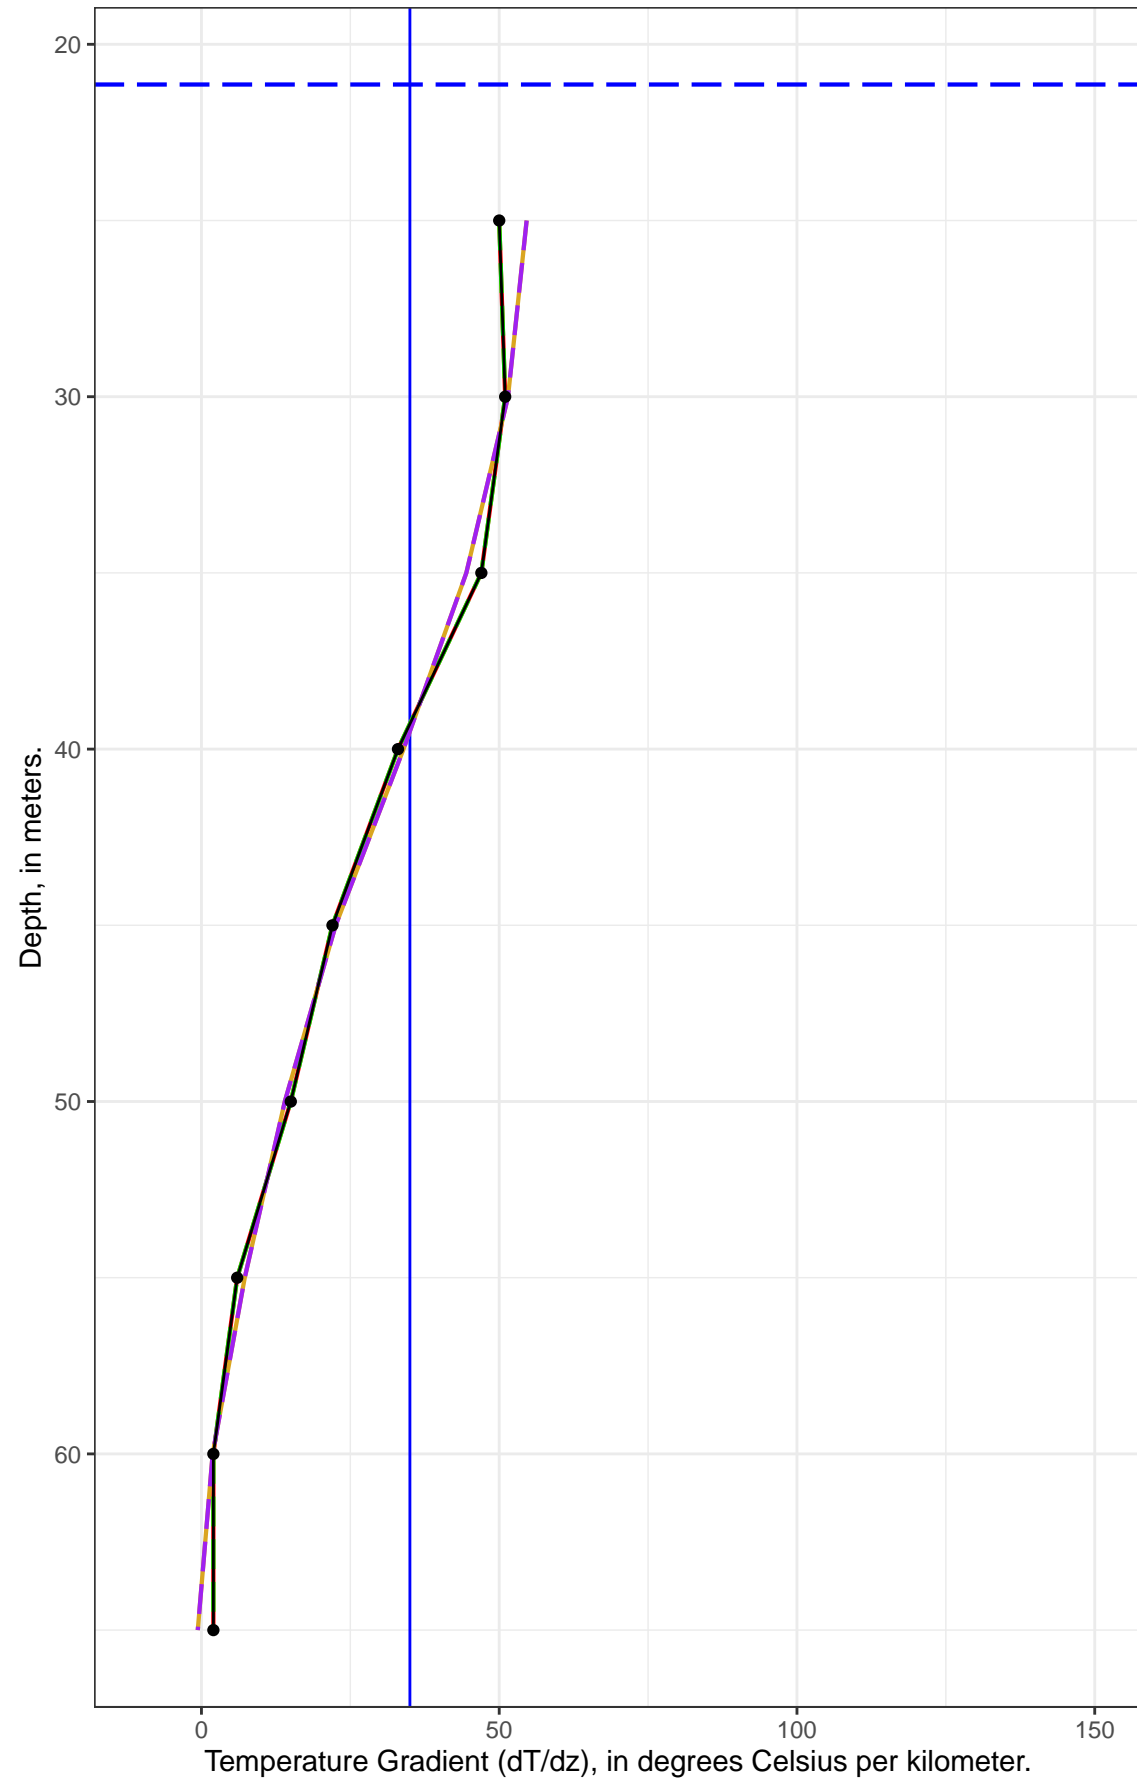

ID: 244 [ST-12] Second Derivative

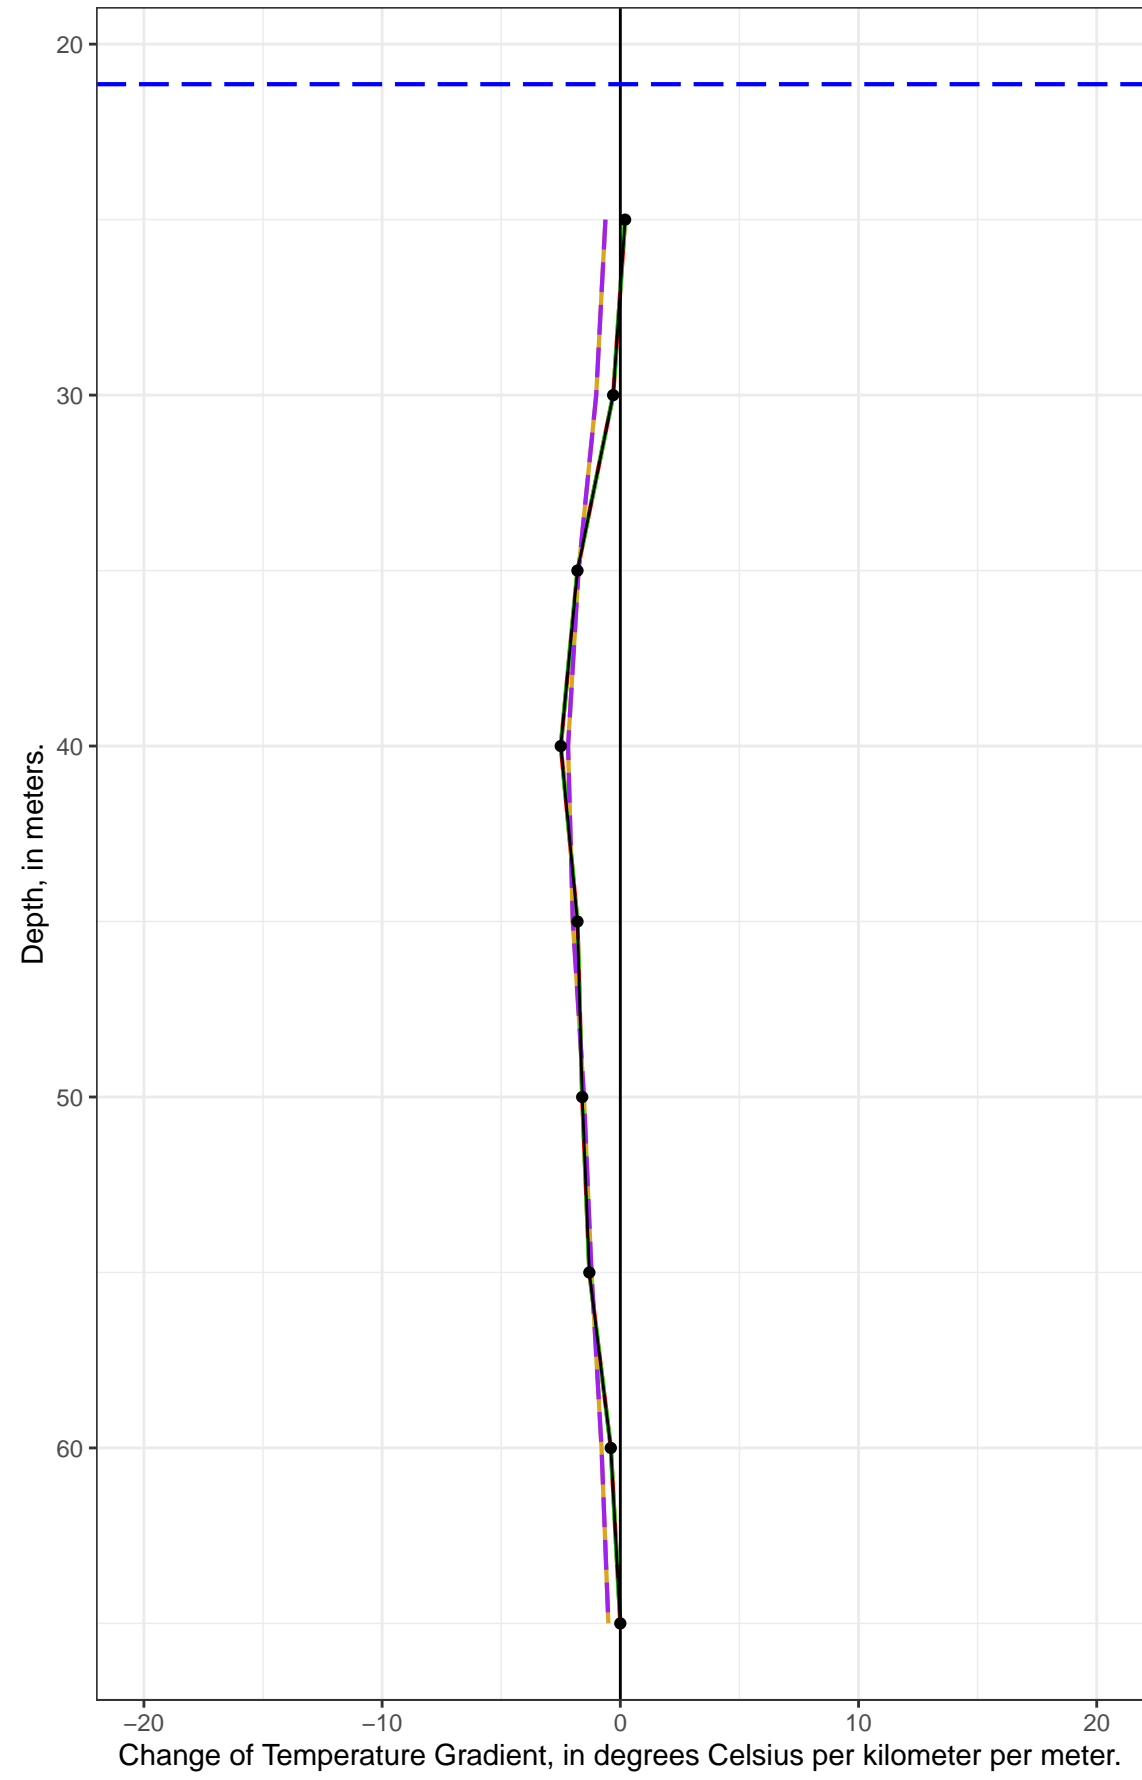

• Data — LOESS (AICC) — LOESS (constant) — LOESS (GCV) — Spline

• Data — LOESS (AICC) — LOESS (constant) — LOESS (GCV) — Spline

• Data — LOESS (AICC) — LOESS (constant) — LOESS (GCV) — Spline

ID: 245 [ST-14] Smoothed Profile

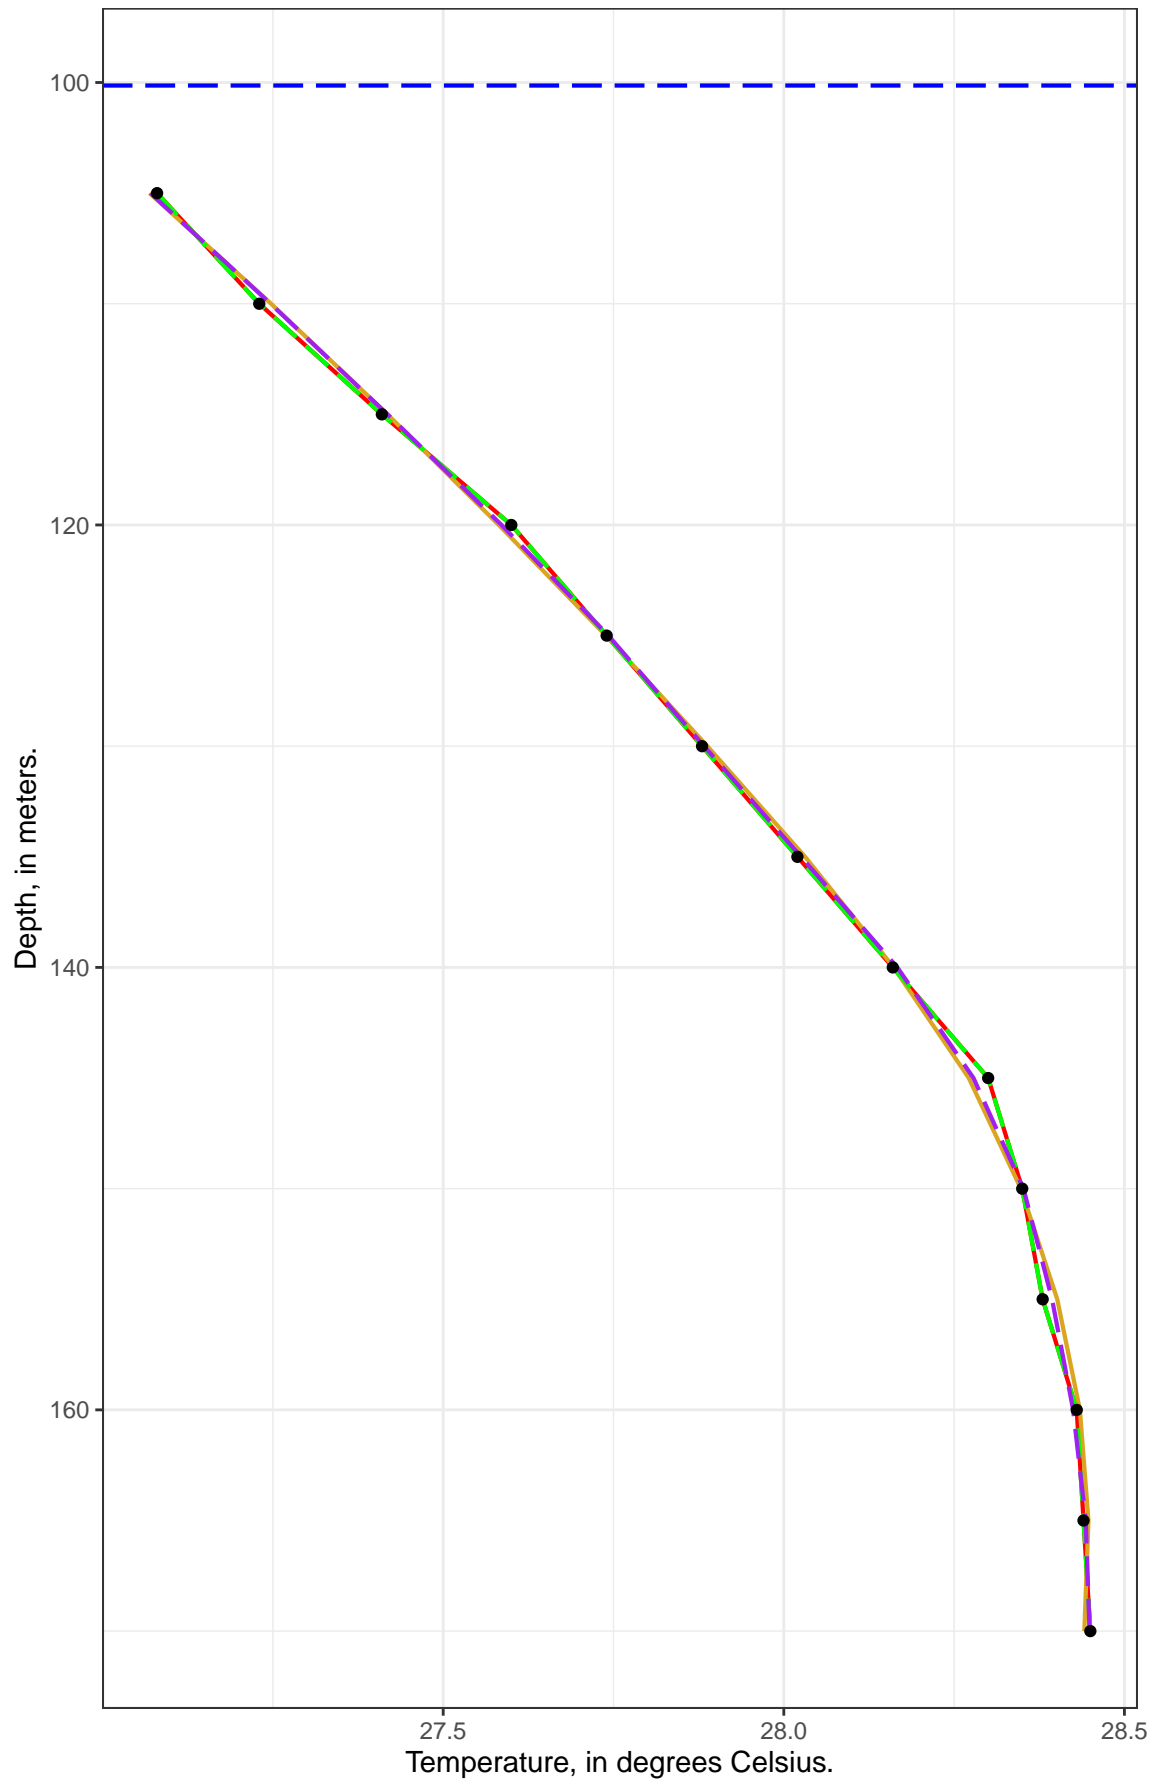

ID: 245 [ST-14] First Derivative

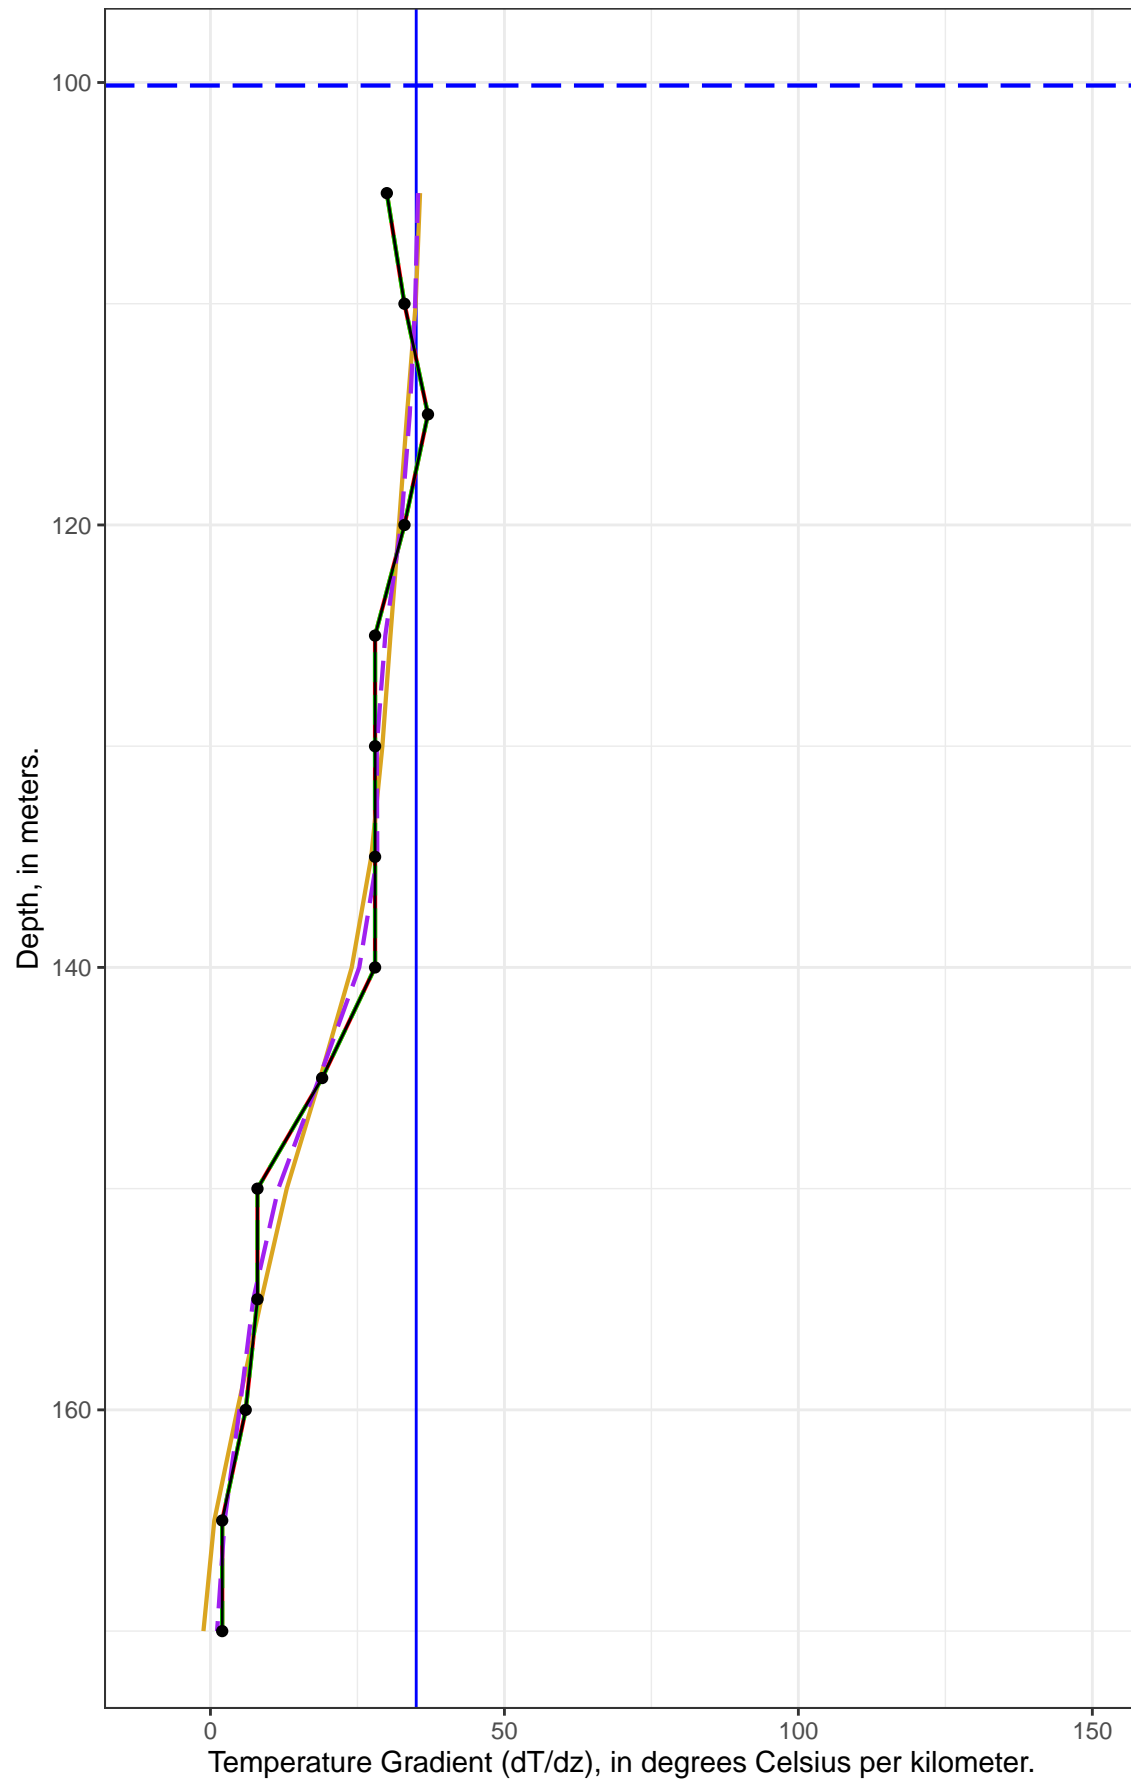

ID: 245 [ST-14] Second Derivative

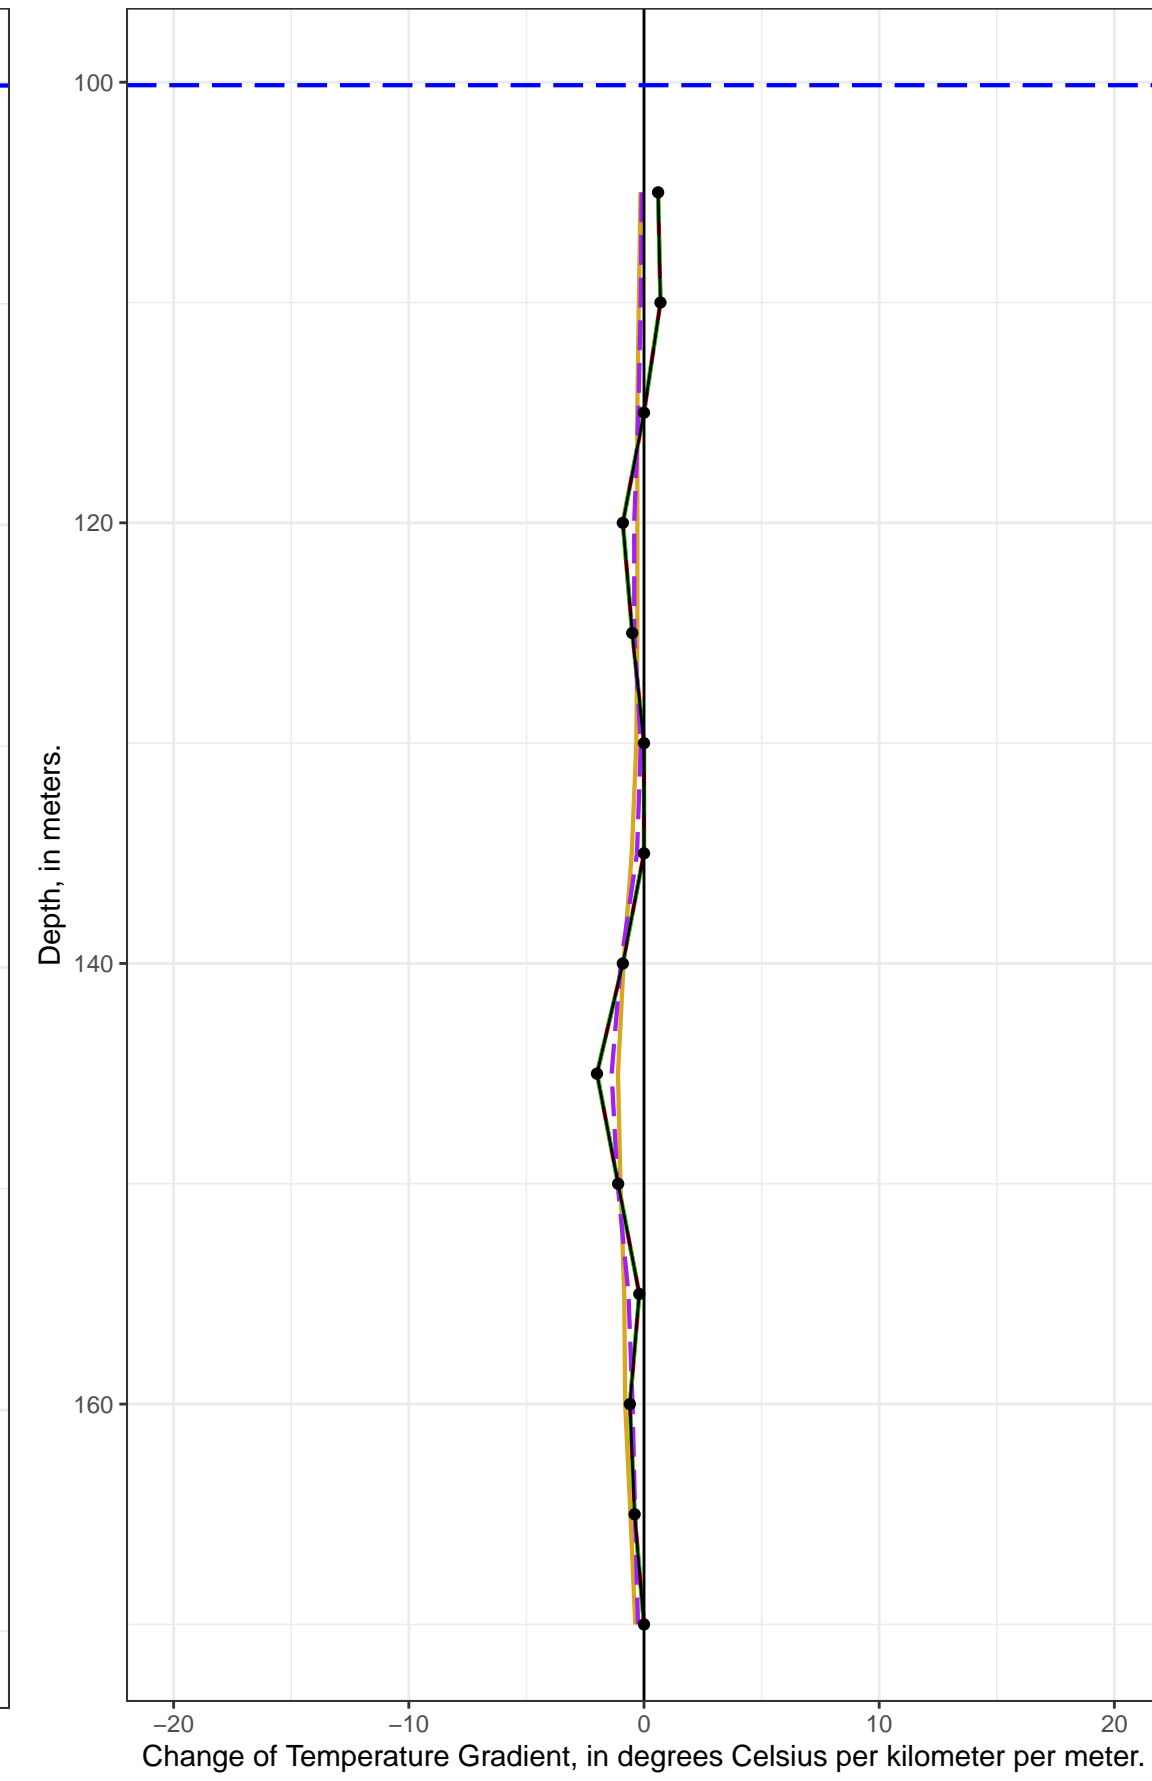

• Data — LOESS (AICC) — LOESS (constant) — LOESS (GCV) — Spline

• Data — LOESS (AICC) — LOESS (constant) — LOESS (GCV) — Spline

• Data — LOESS (AICC) — LOESS (constant) — LOESS (GCV) — Spline

ID: 246 [ST-15] Smoothed Profile

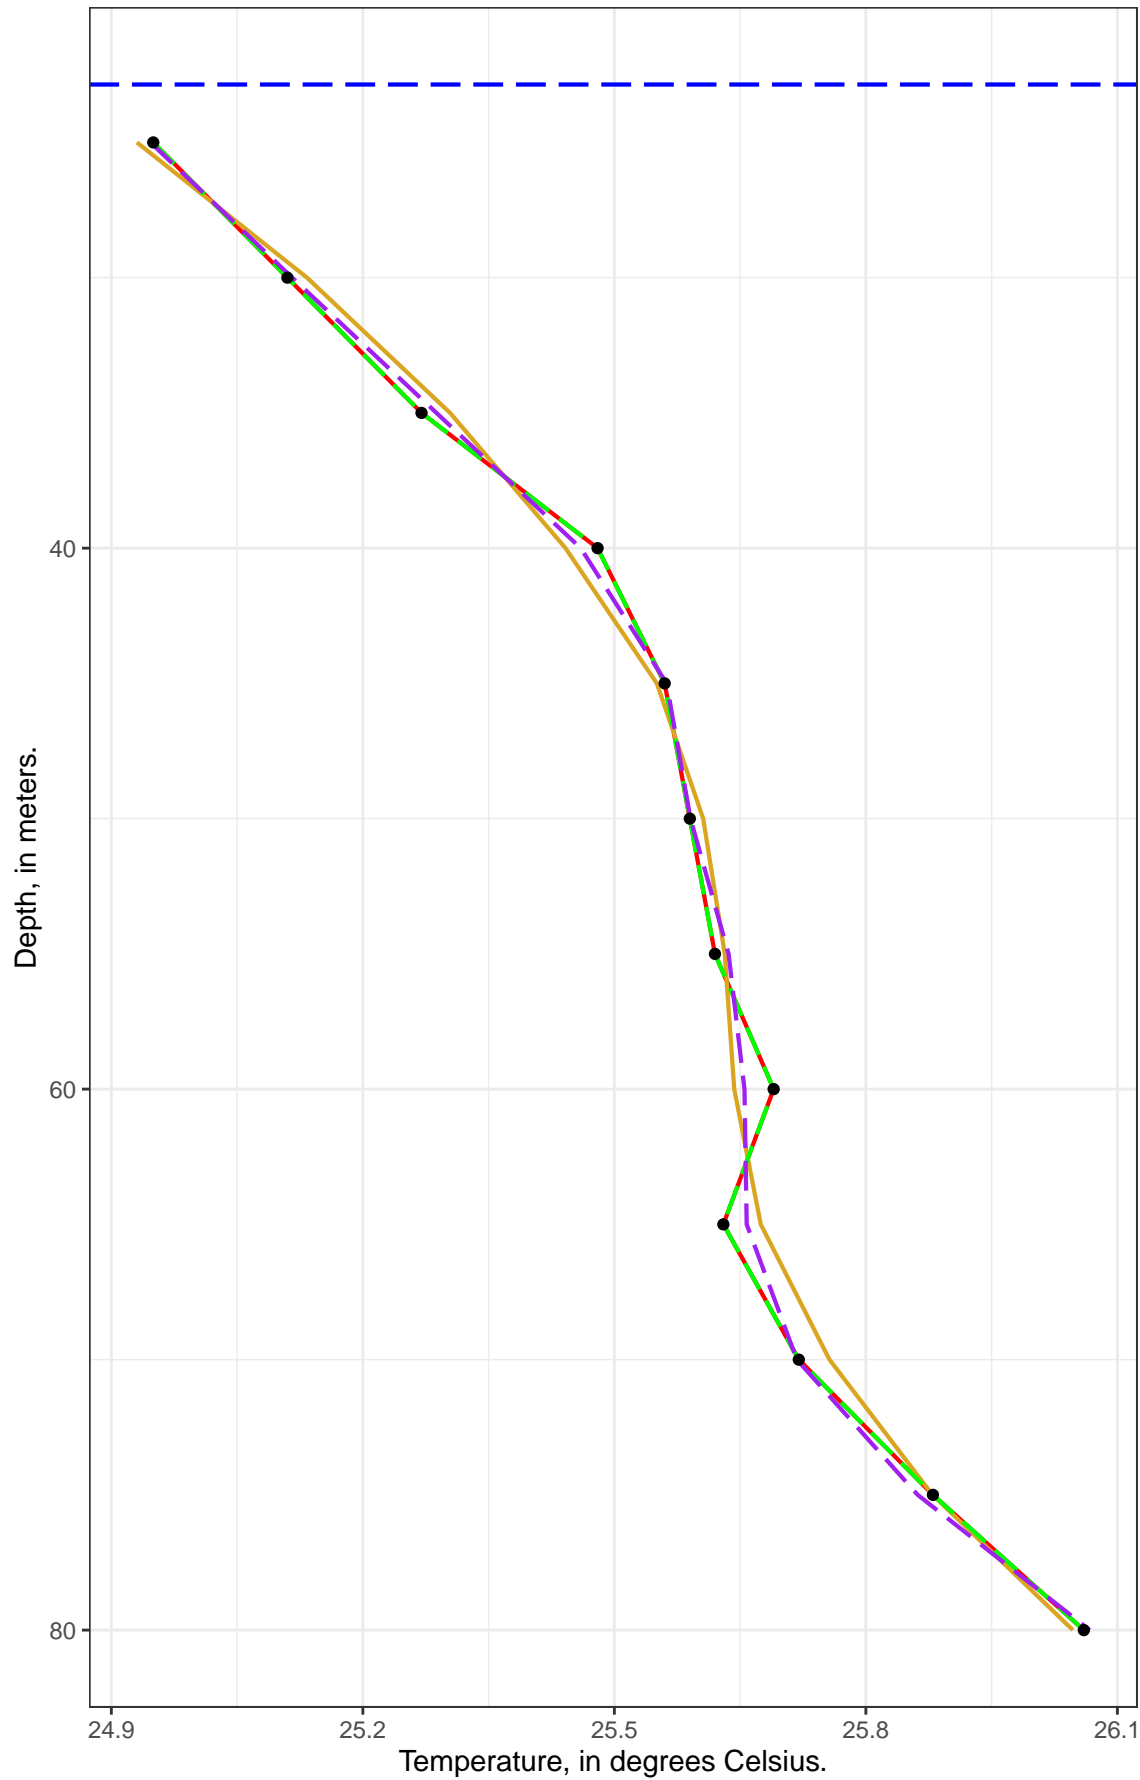

• Data • LOESS (AICC) • LOESS (constant) • LOESS (GCV) • Spline

ID: 246 [ST-15] First Derivative

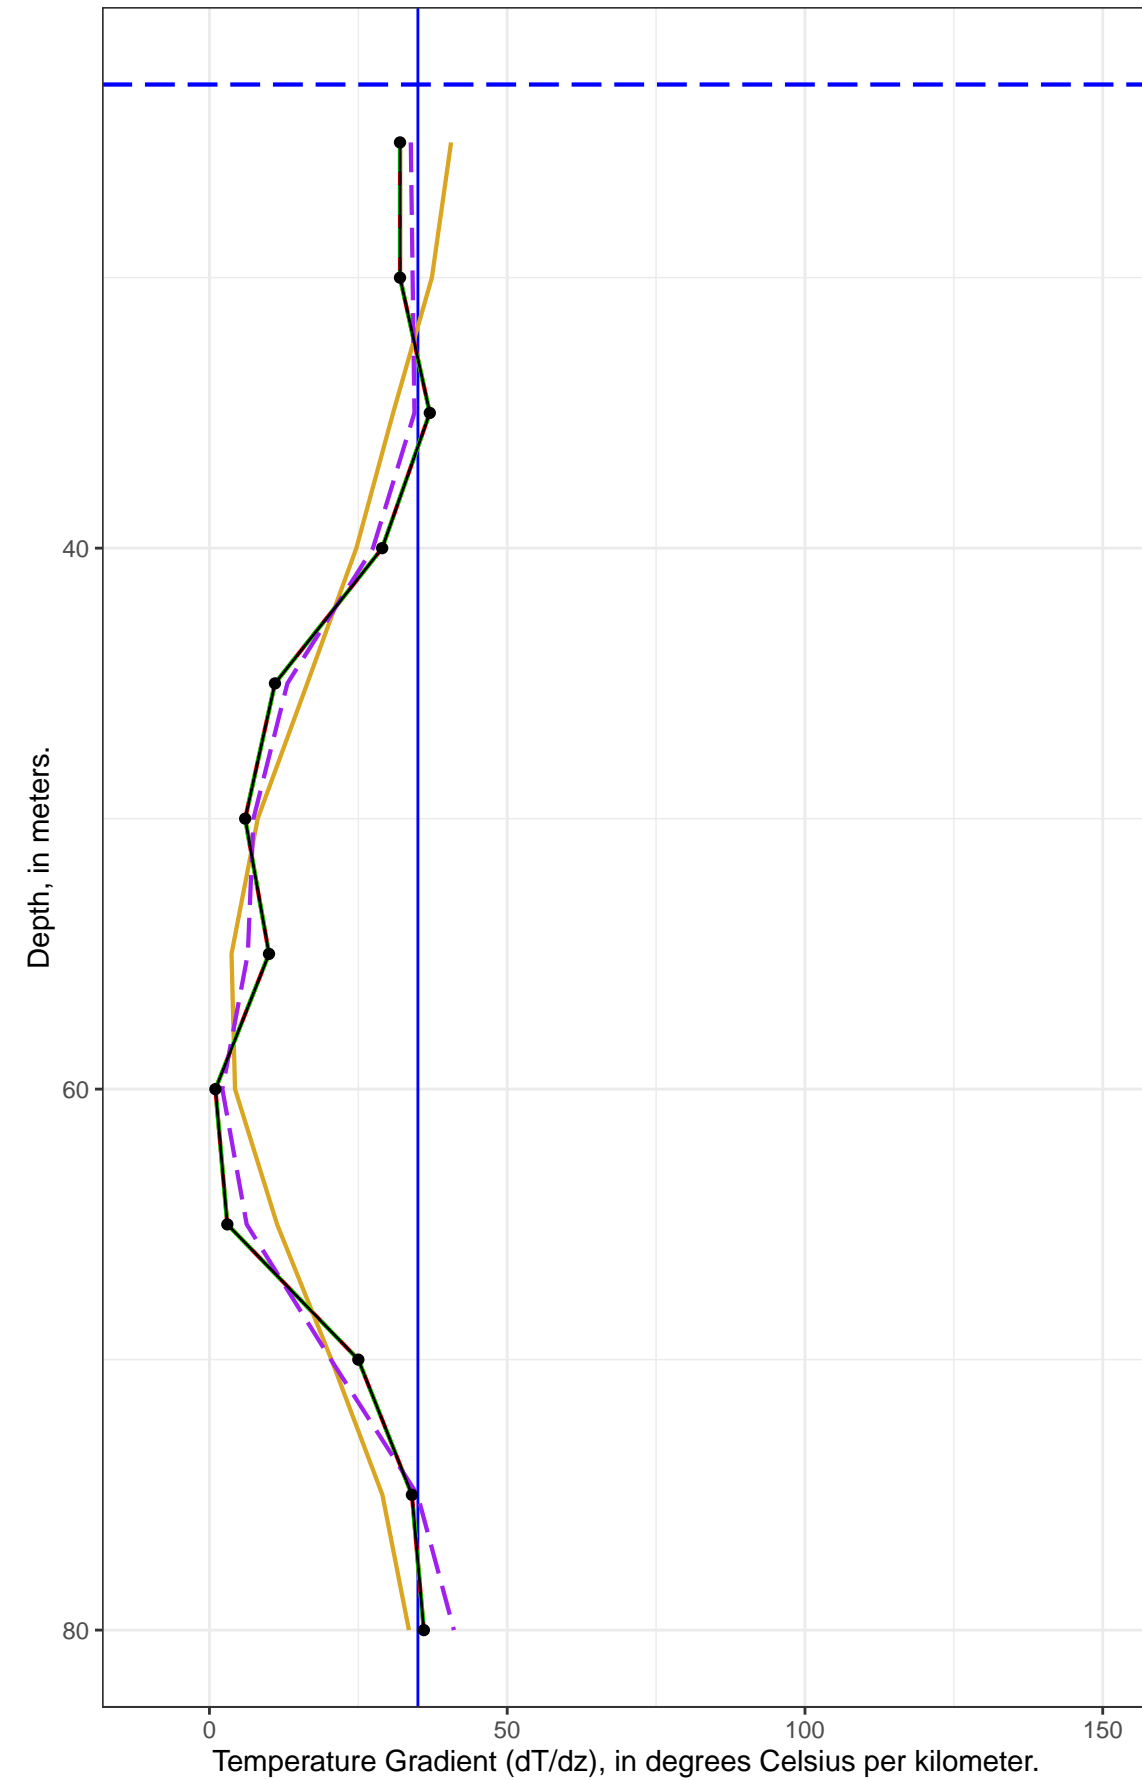

• Data • LOESS (AICC) • LOESS (constant) • LOESS (GCV) • Spline

ID: 246 [ST-15] Second Derivative

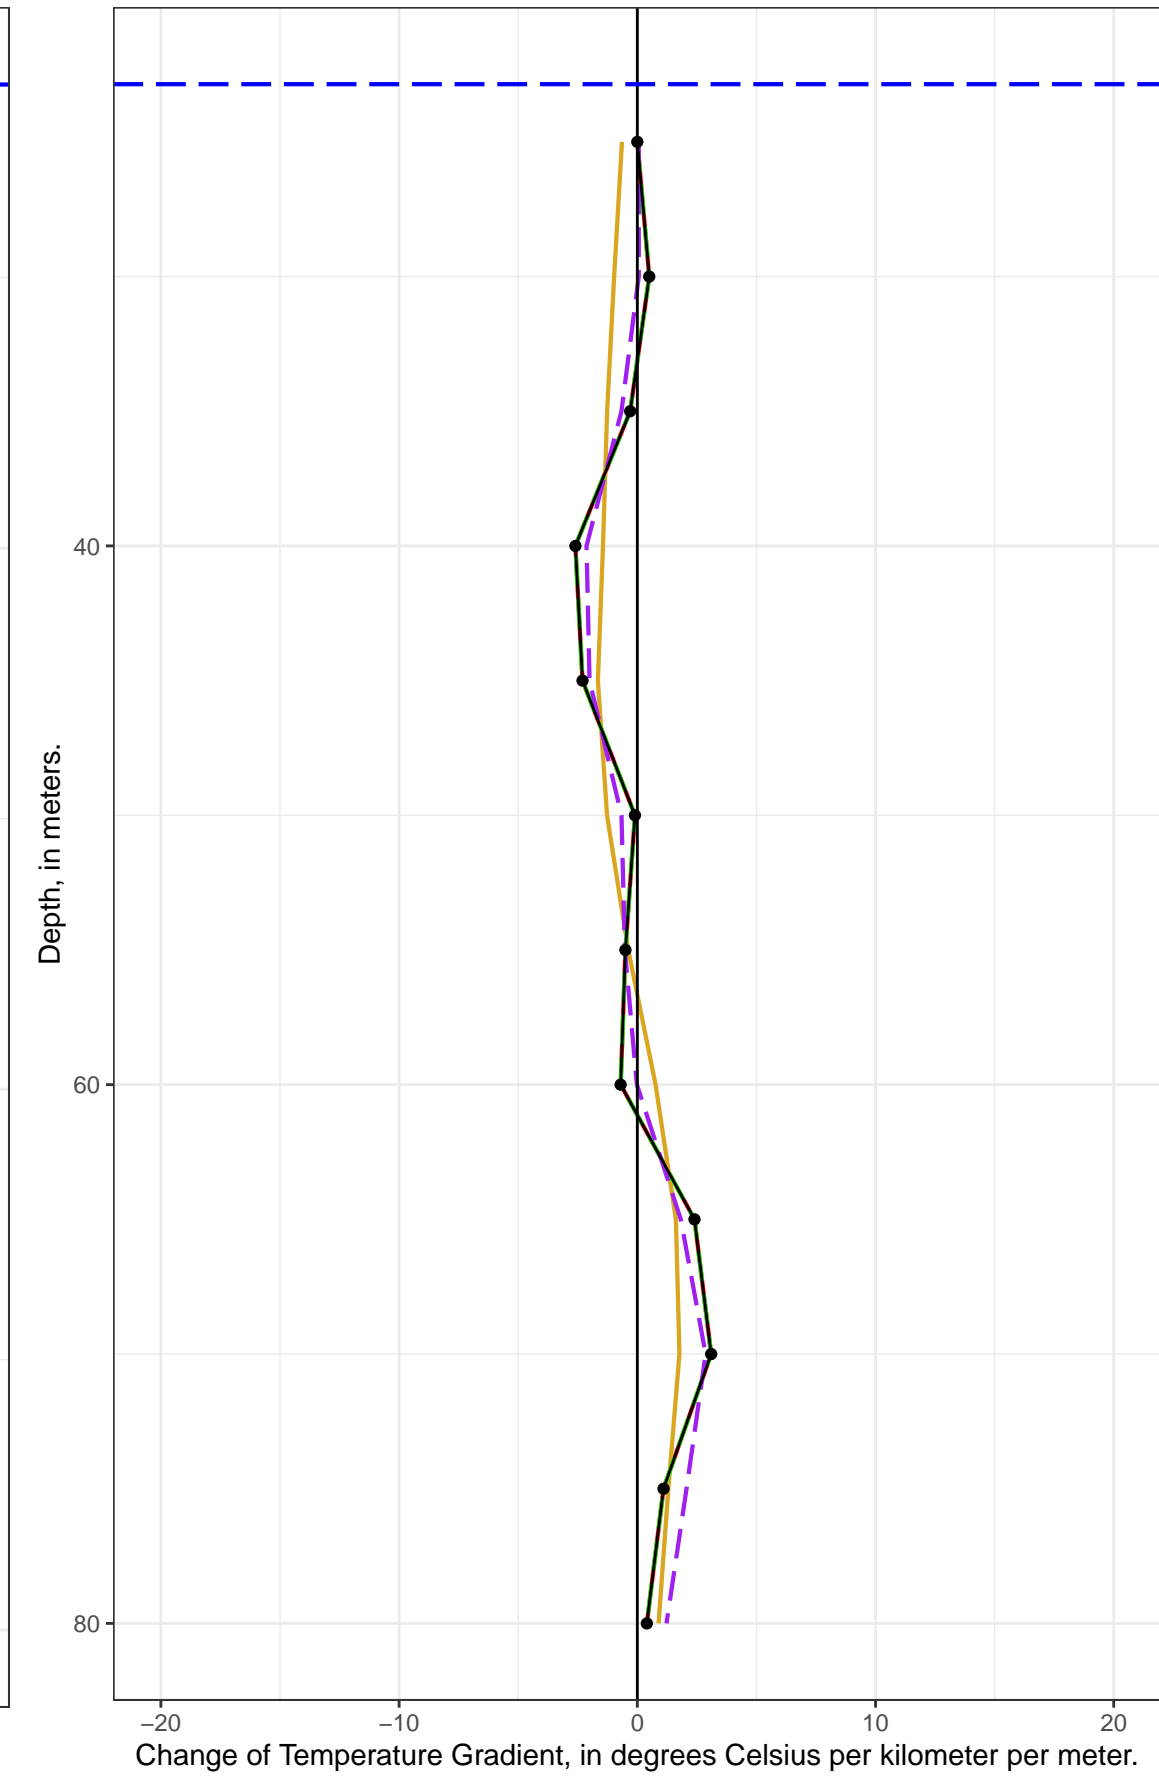

• Data • LOESS (AICC) • LOESS (constant) • LOESS (GCV) • Spline

ID: 247 [ST-21] Smoothed Profile

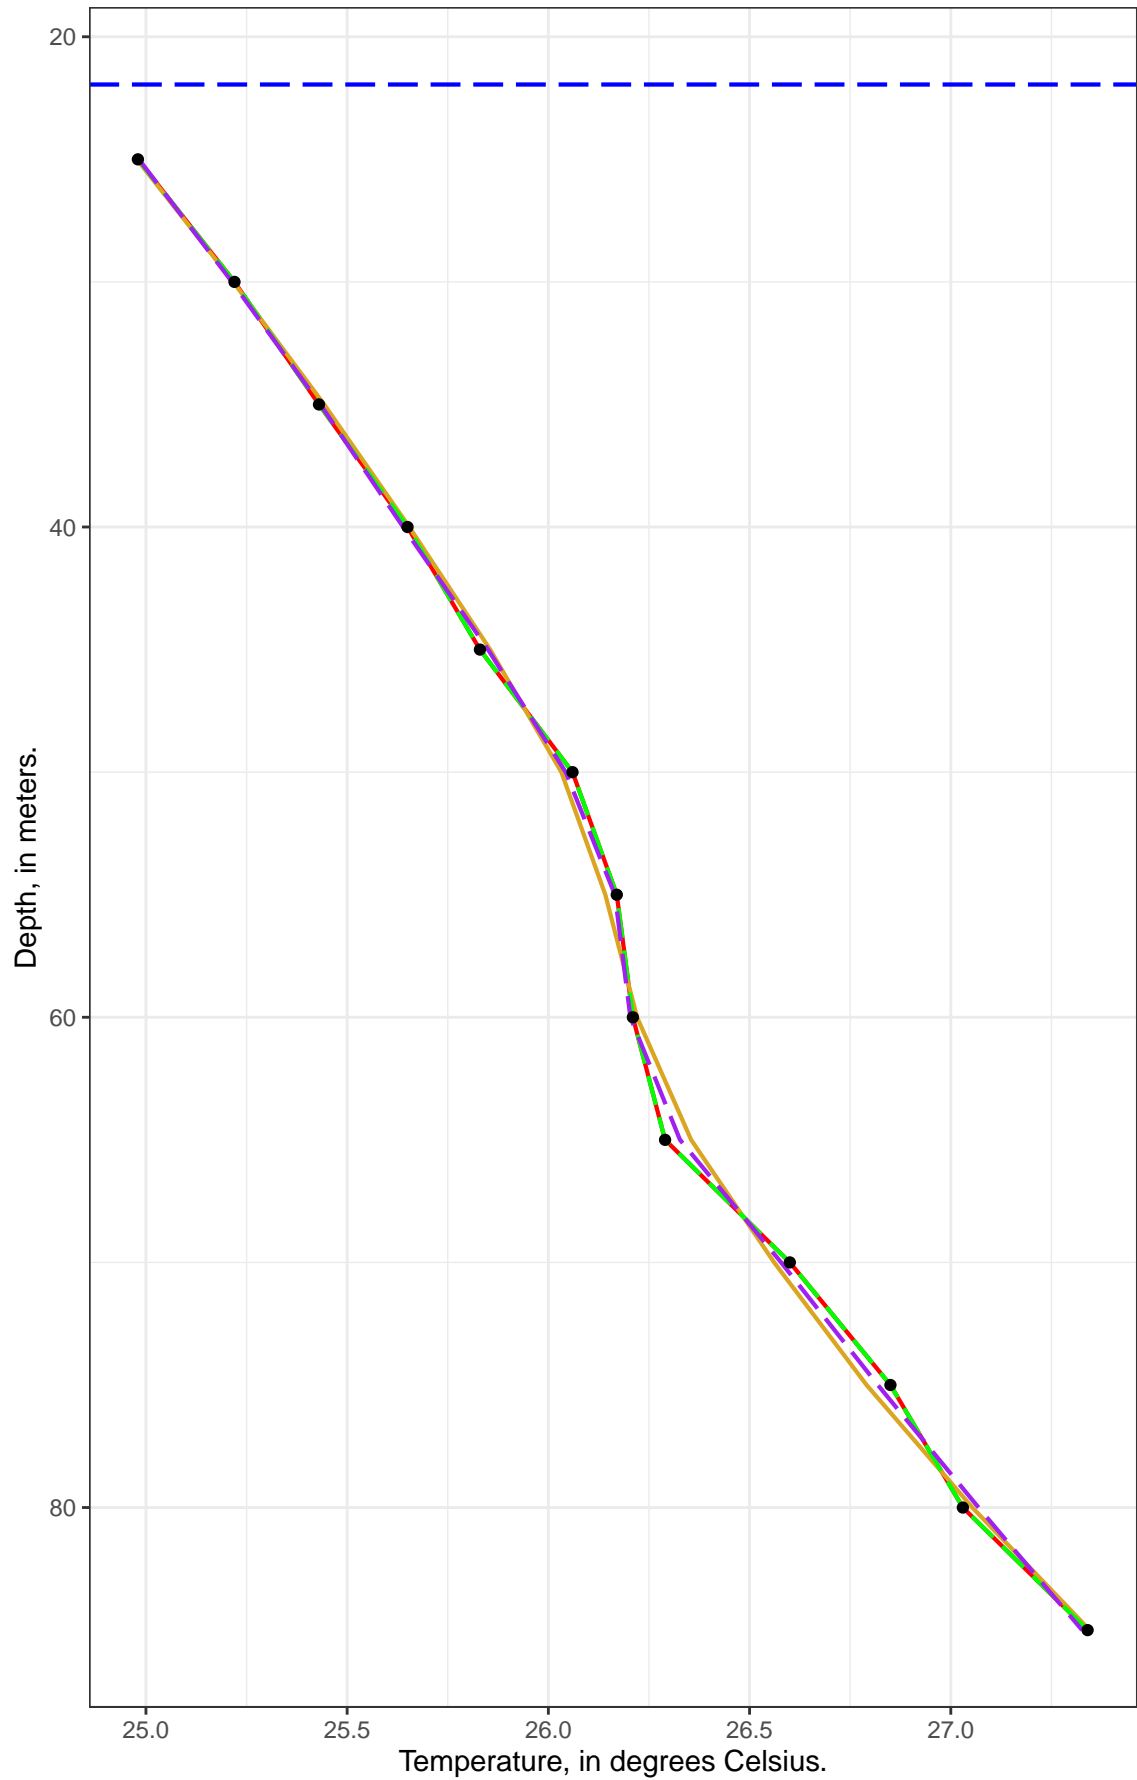

• Data • LOESS (AICC) • LOESS (constant) • LOESS (GCV) • Spline

ID: 247 [ST-21] First Derivative

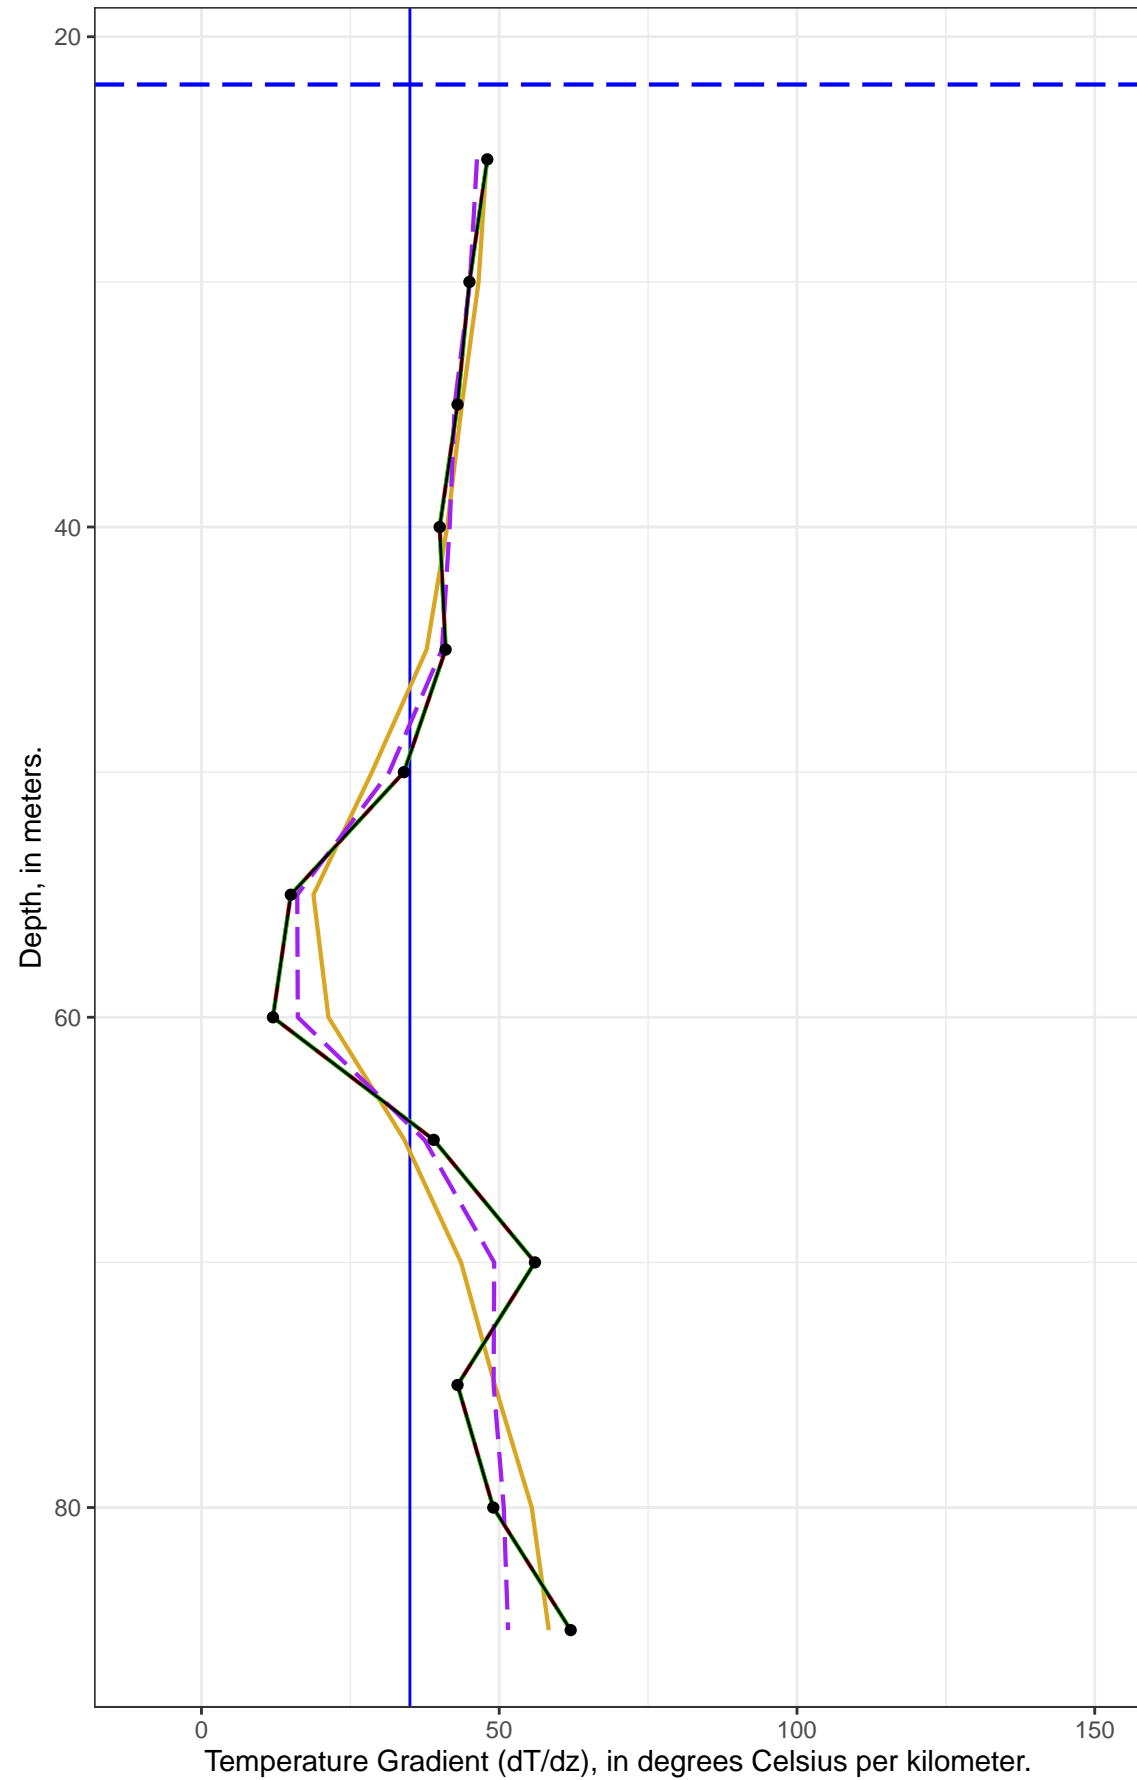

• Data • LOESS (AICC) • LOESS (constant) • LOESS (GCV) • Spline

ID: 247 [ST-21] Second Derivative

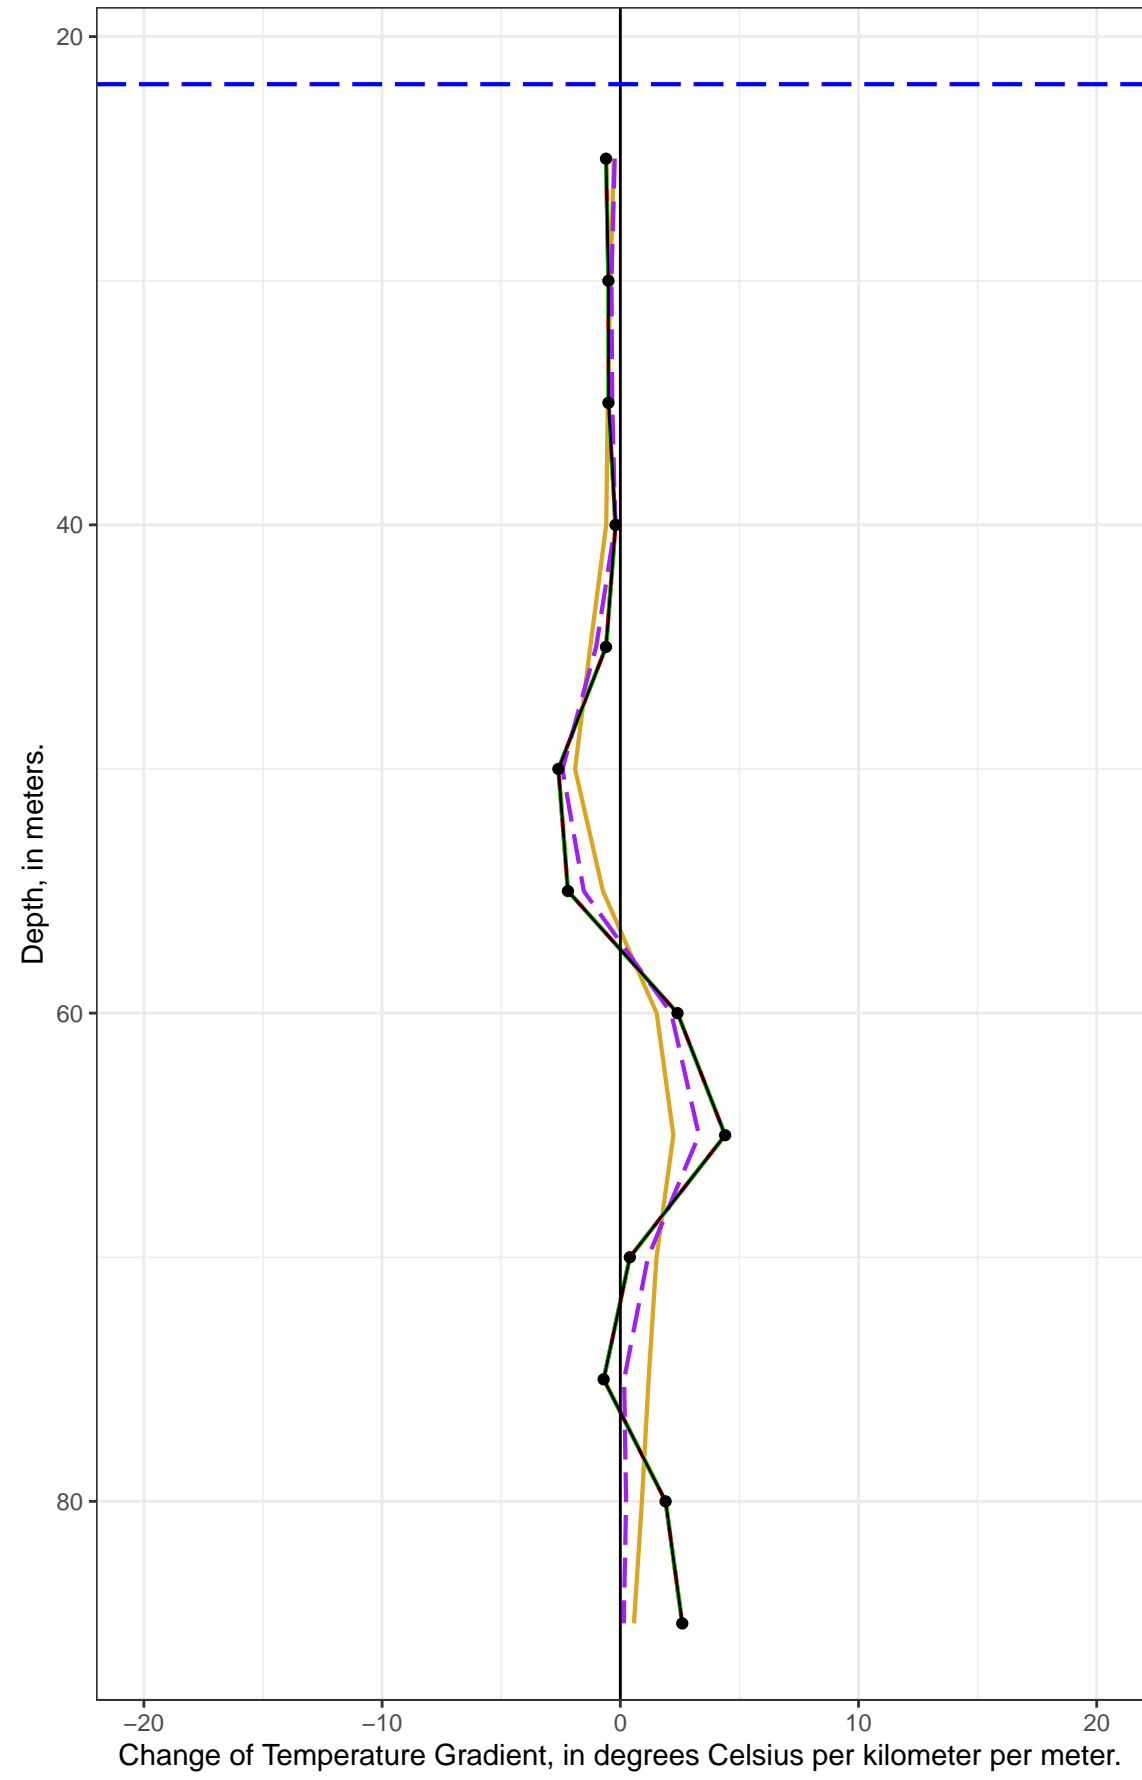

• Data • LOESS (AICC) • LOESS (constant) • LOESS (GCV) • Spline

ID: 248 [ST-23] Smoothed Profile

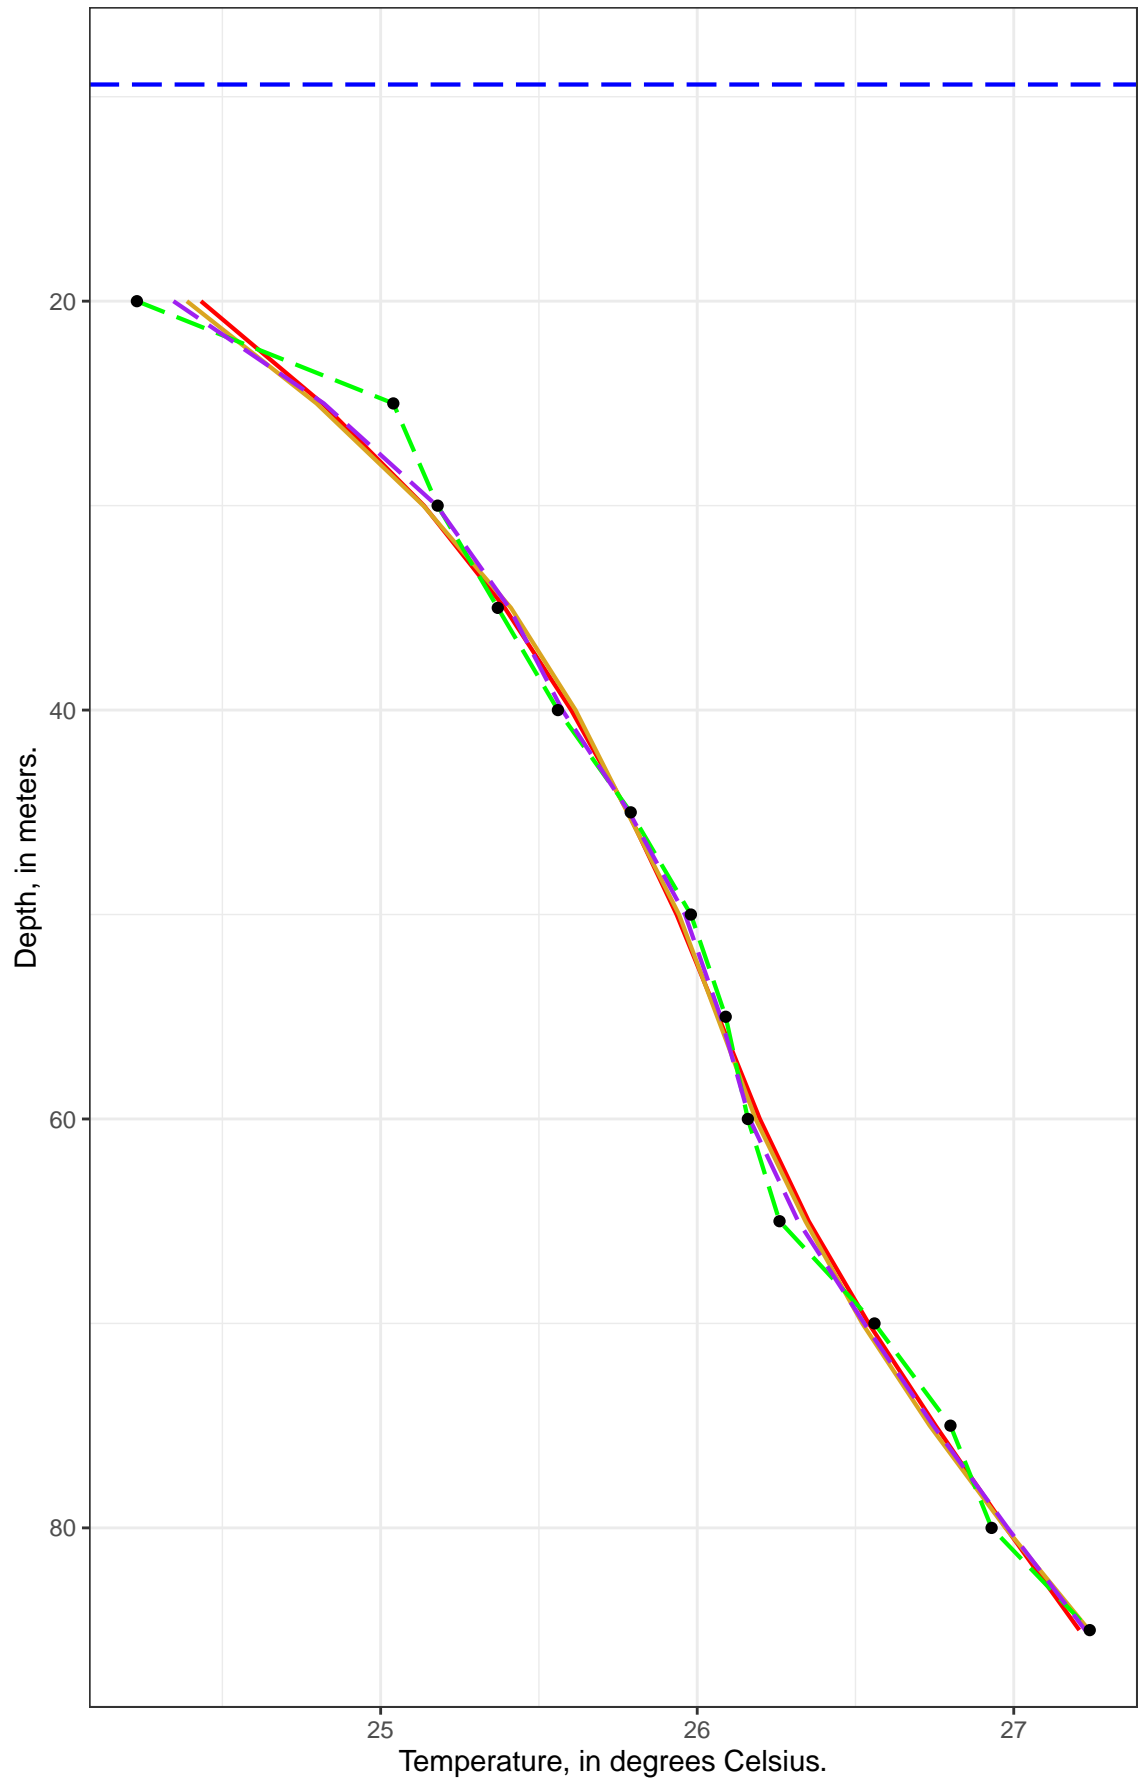

ID: 248 [ST-23] First Derivative

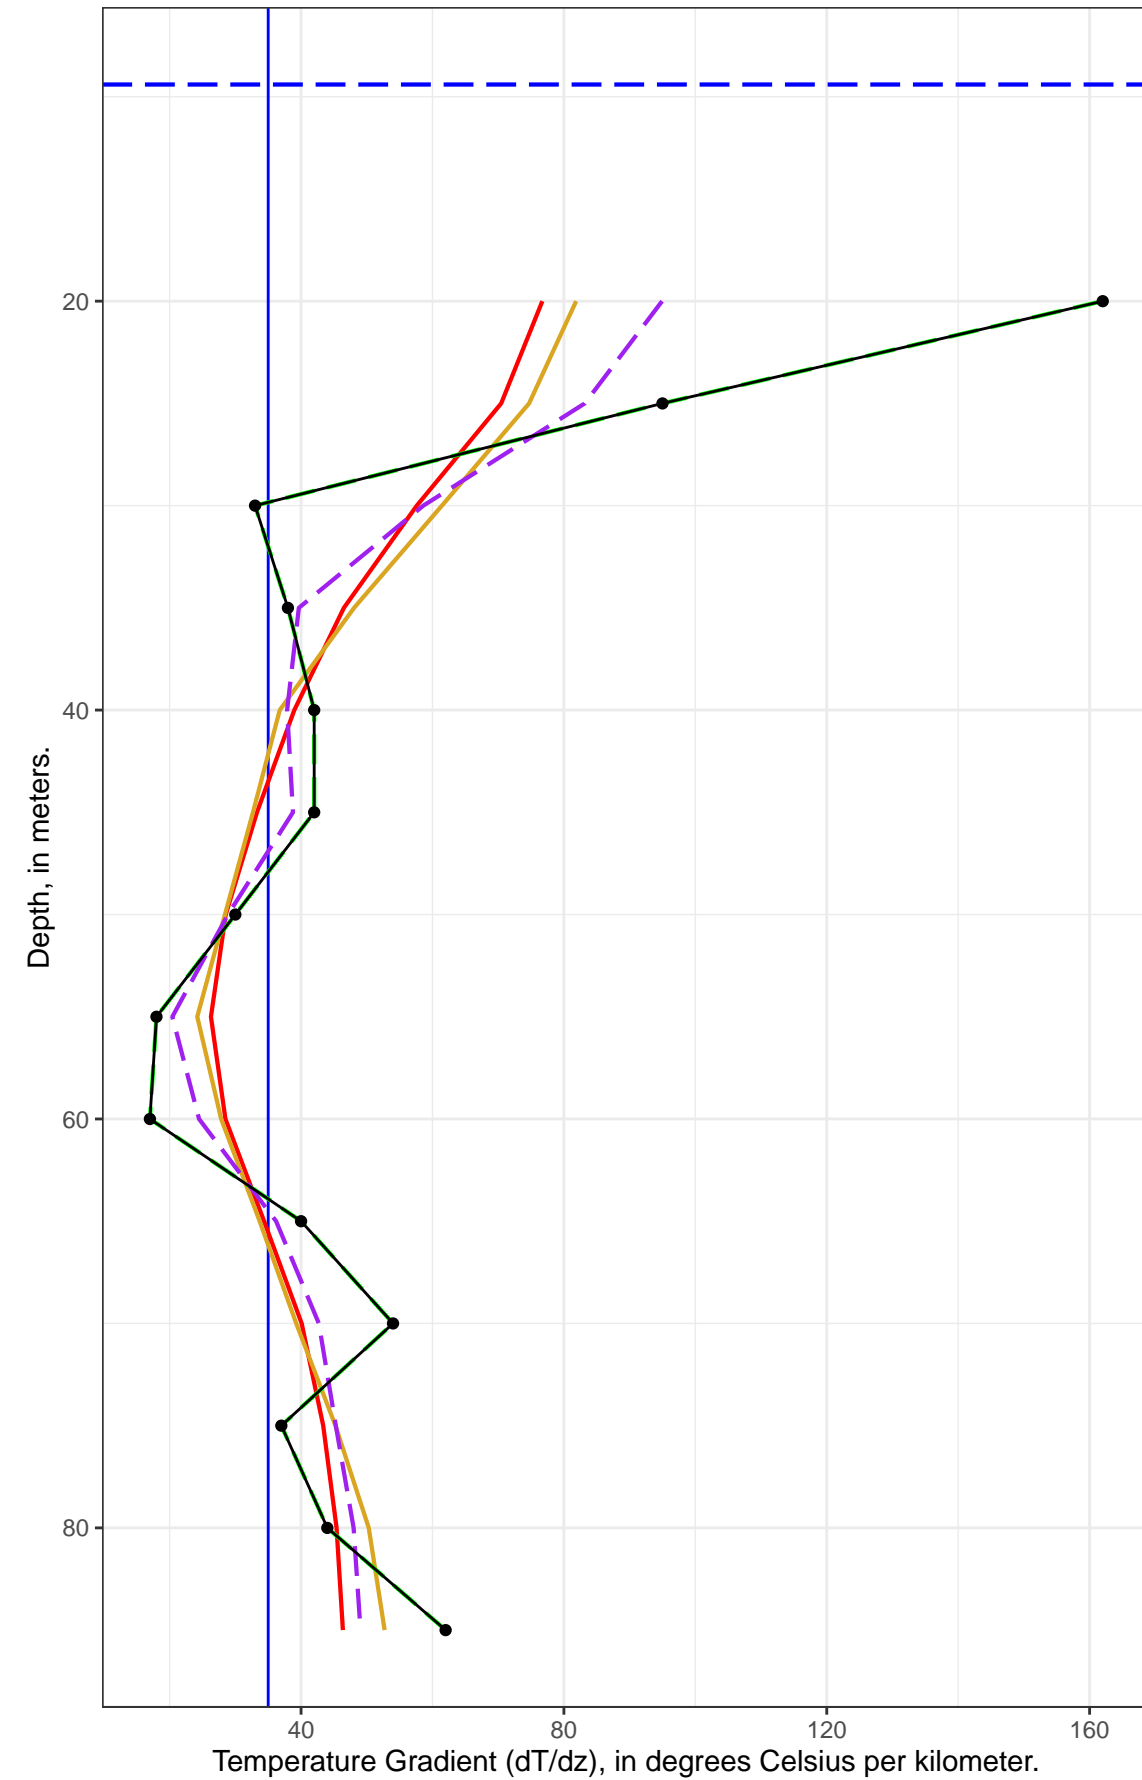

ID: 248 [ST-23] Second Derivative

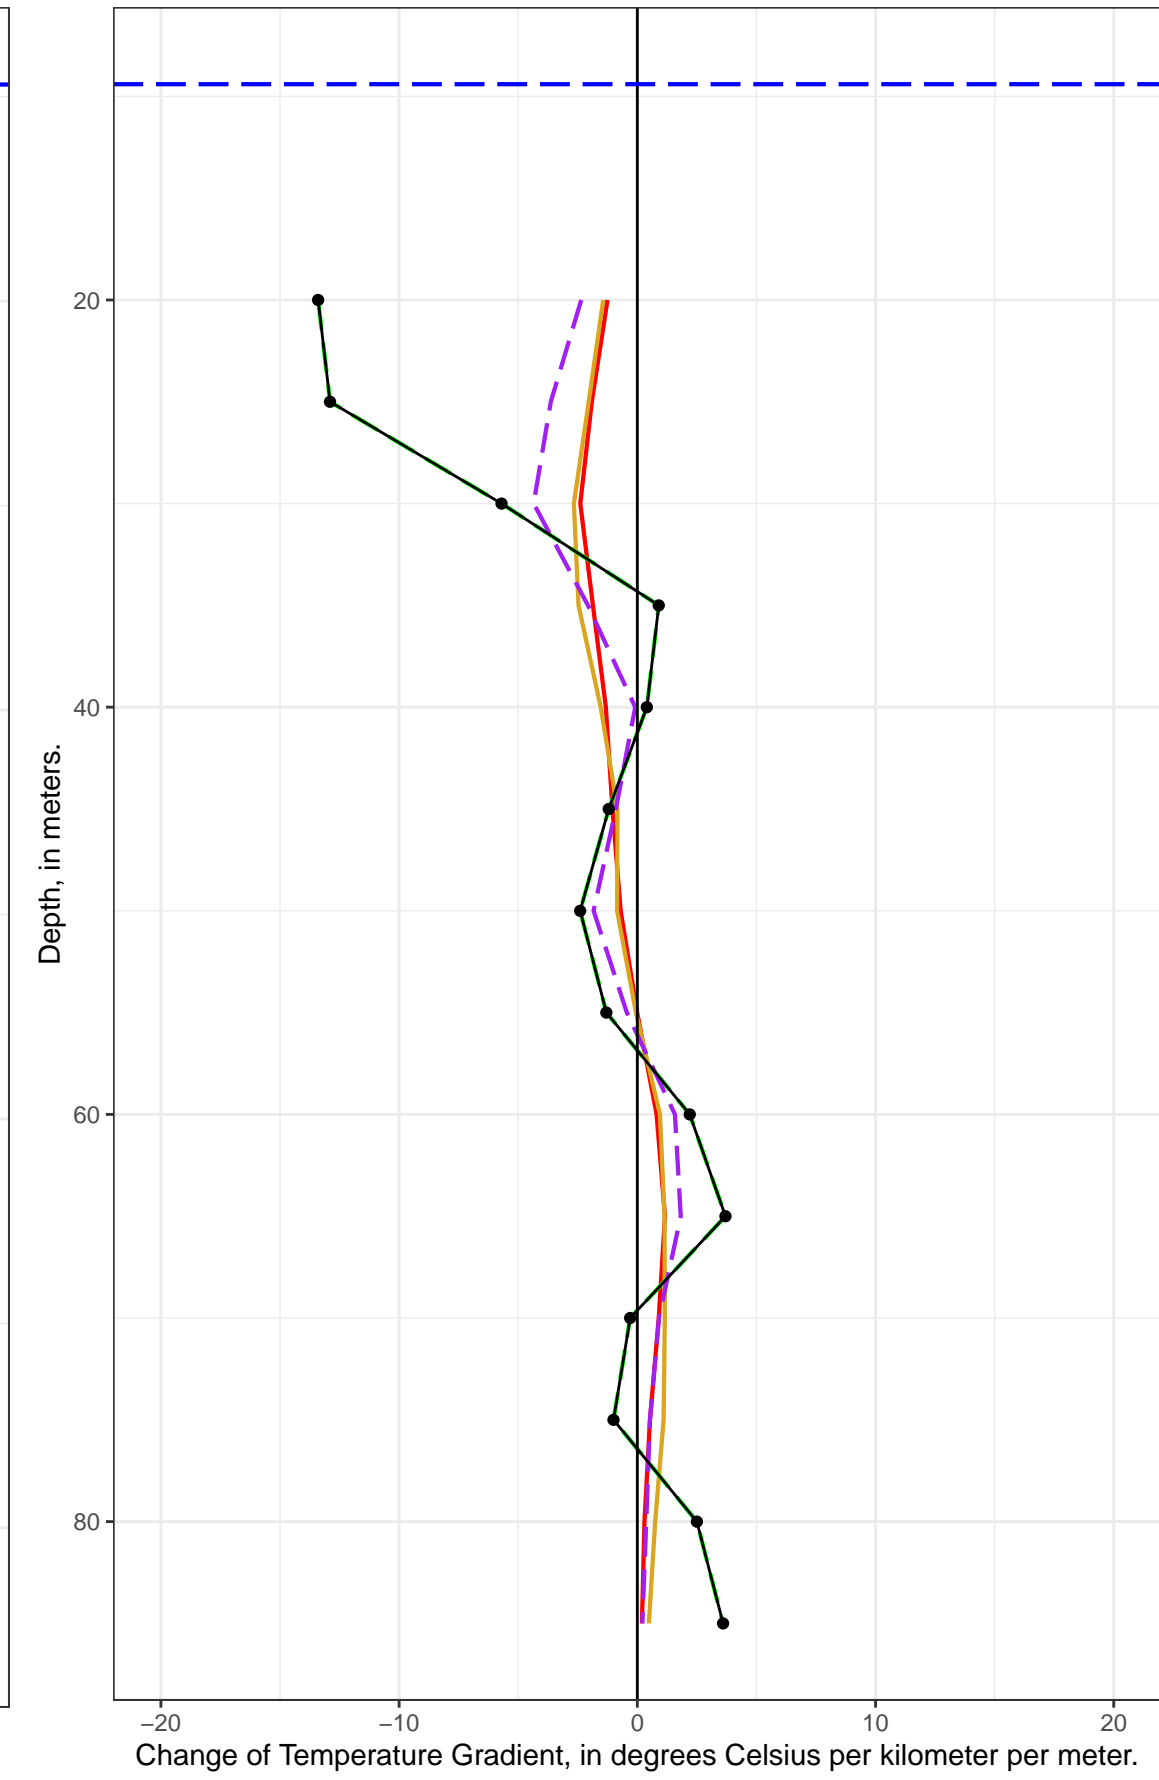

• Data • LOESS (AICC) • LOESS (constant) • LOESS (GCV) • Spline

• Data • LOESS (AICC) • LOESS (constant) • LOESS (GCV) • Spline

• Data • LOESS (AICC) • LOESS (constant) • LOESS (GCV) • Spline



ID: 249 [ST-25] Smoothed Profile

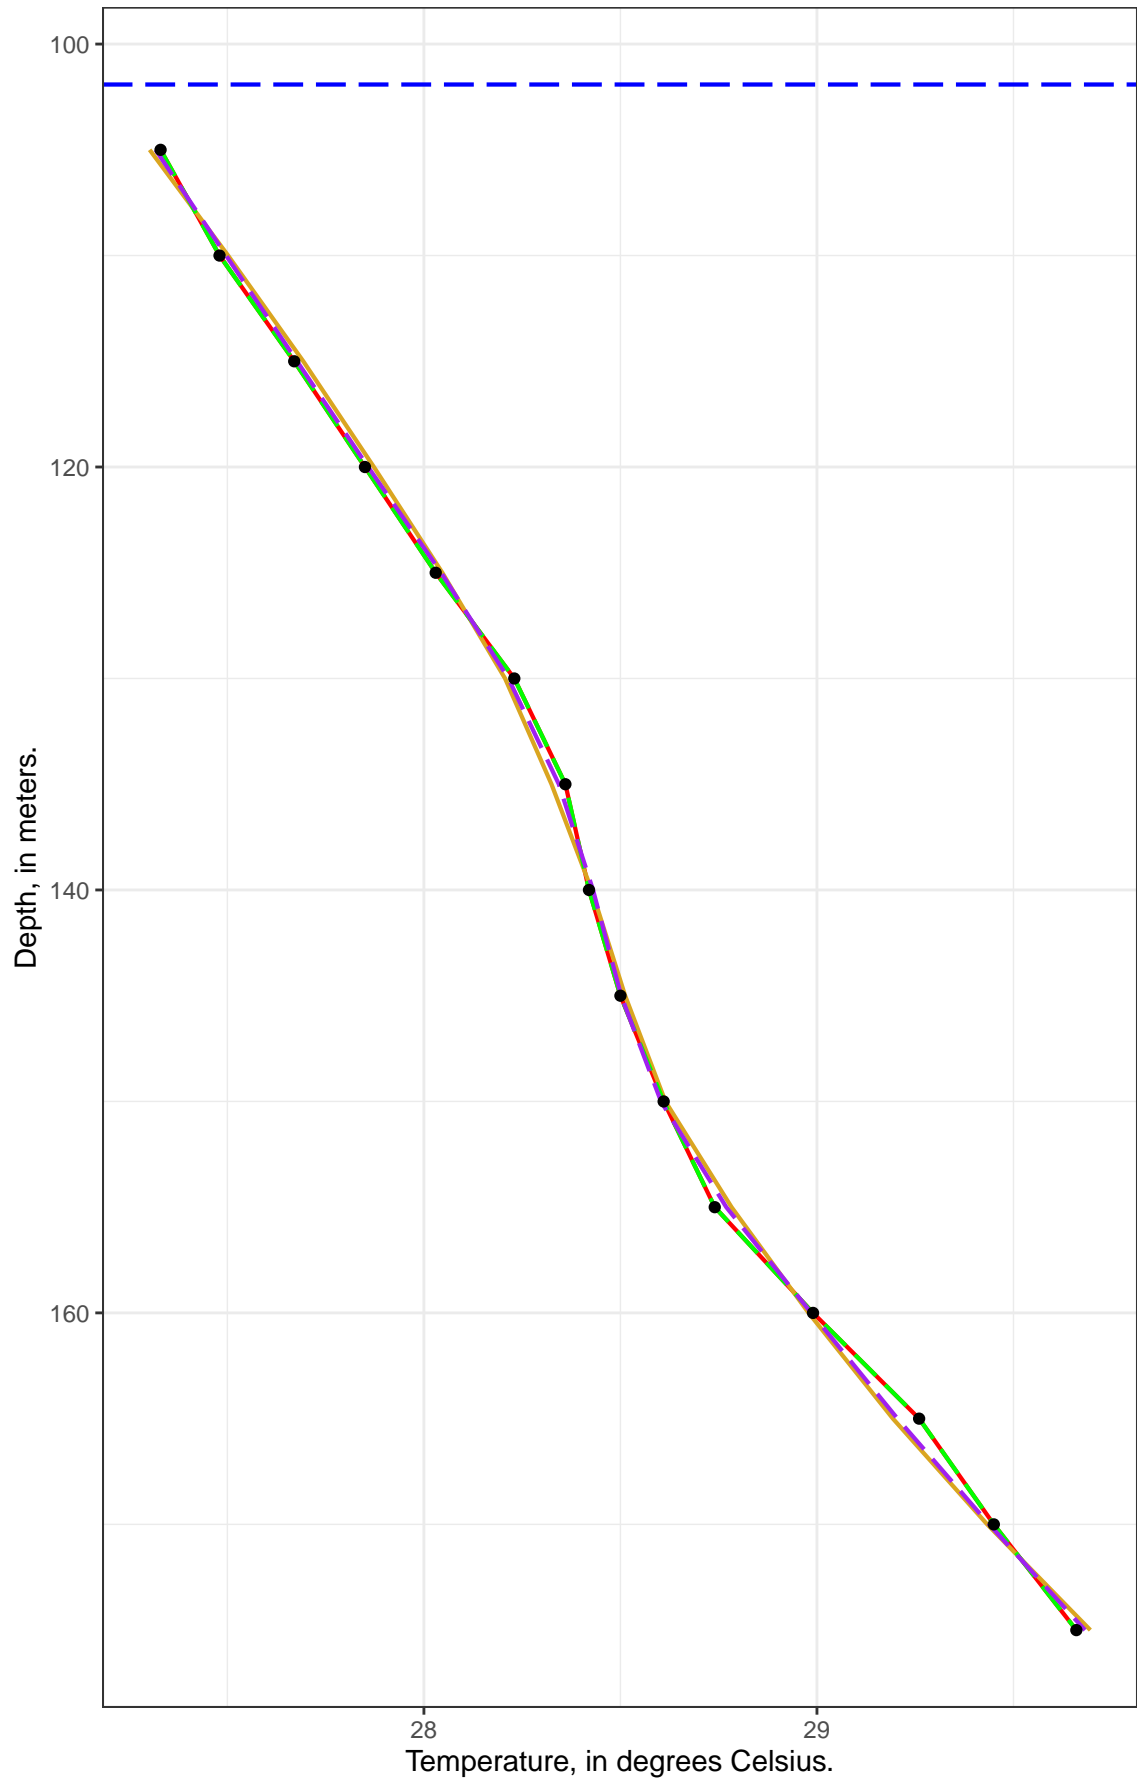

ID: 249 [ST-25] First Derivative

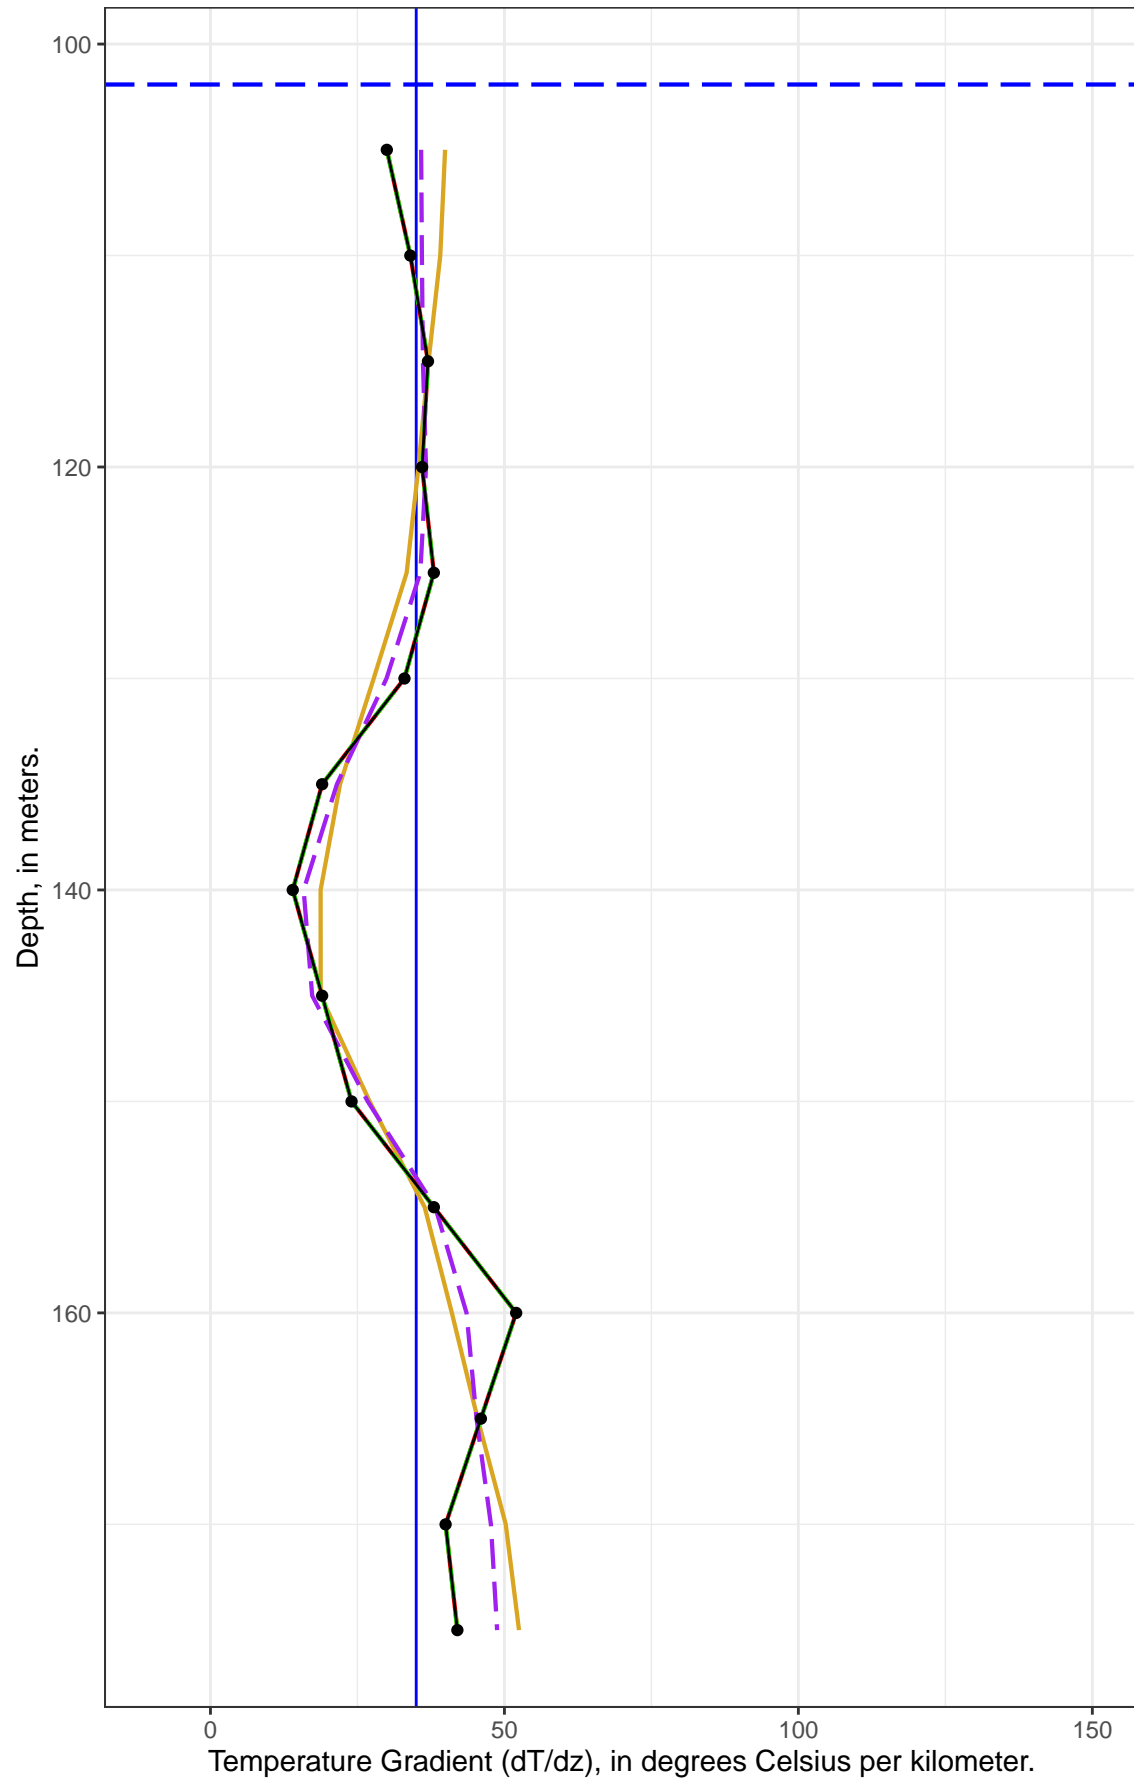

ID: 249 [ST-25] Second Derivative

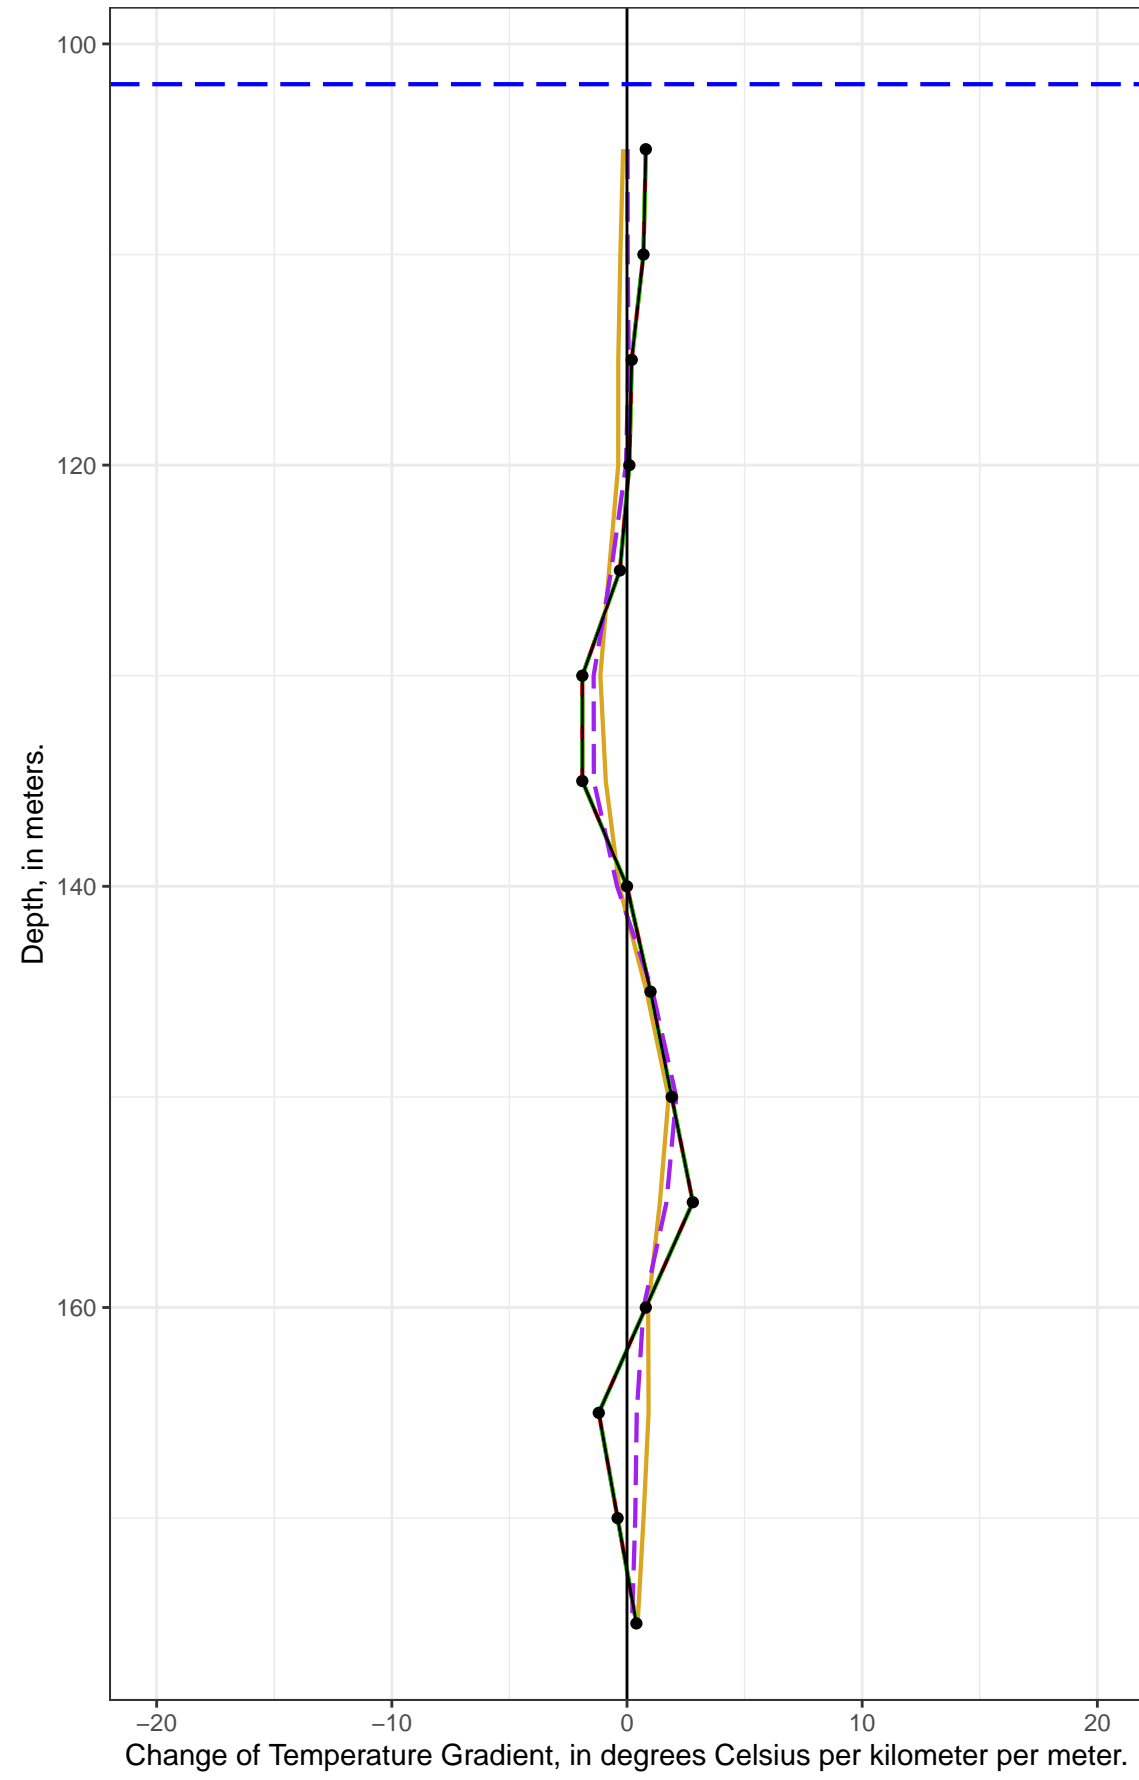

• Data — LOESS (AICC) — LOESS (constant) — LOESS (GCV) — Spline

• Data — LOESS (AICC) — LOESS (constant) — LOESS (GCV) — Spline

• Data — LOESS (AICC) — LOESS (constant) — LOESS (GCV) — Spline

ID: 250 [ST-26] Smoothed Profile

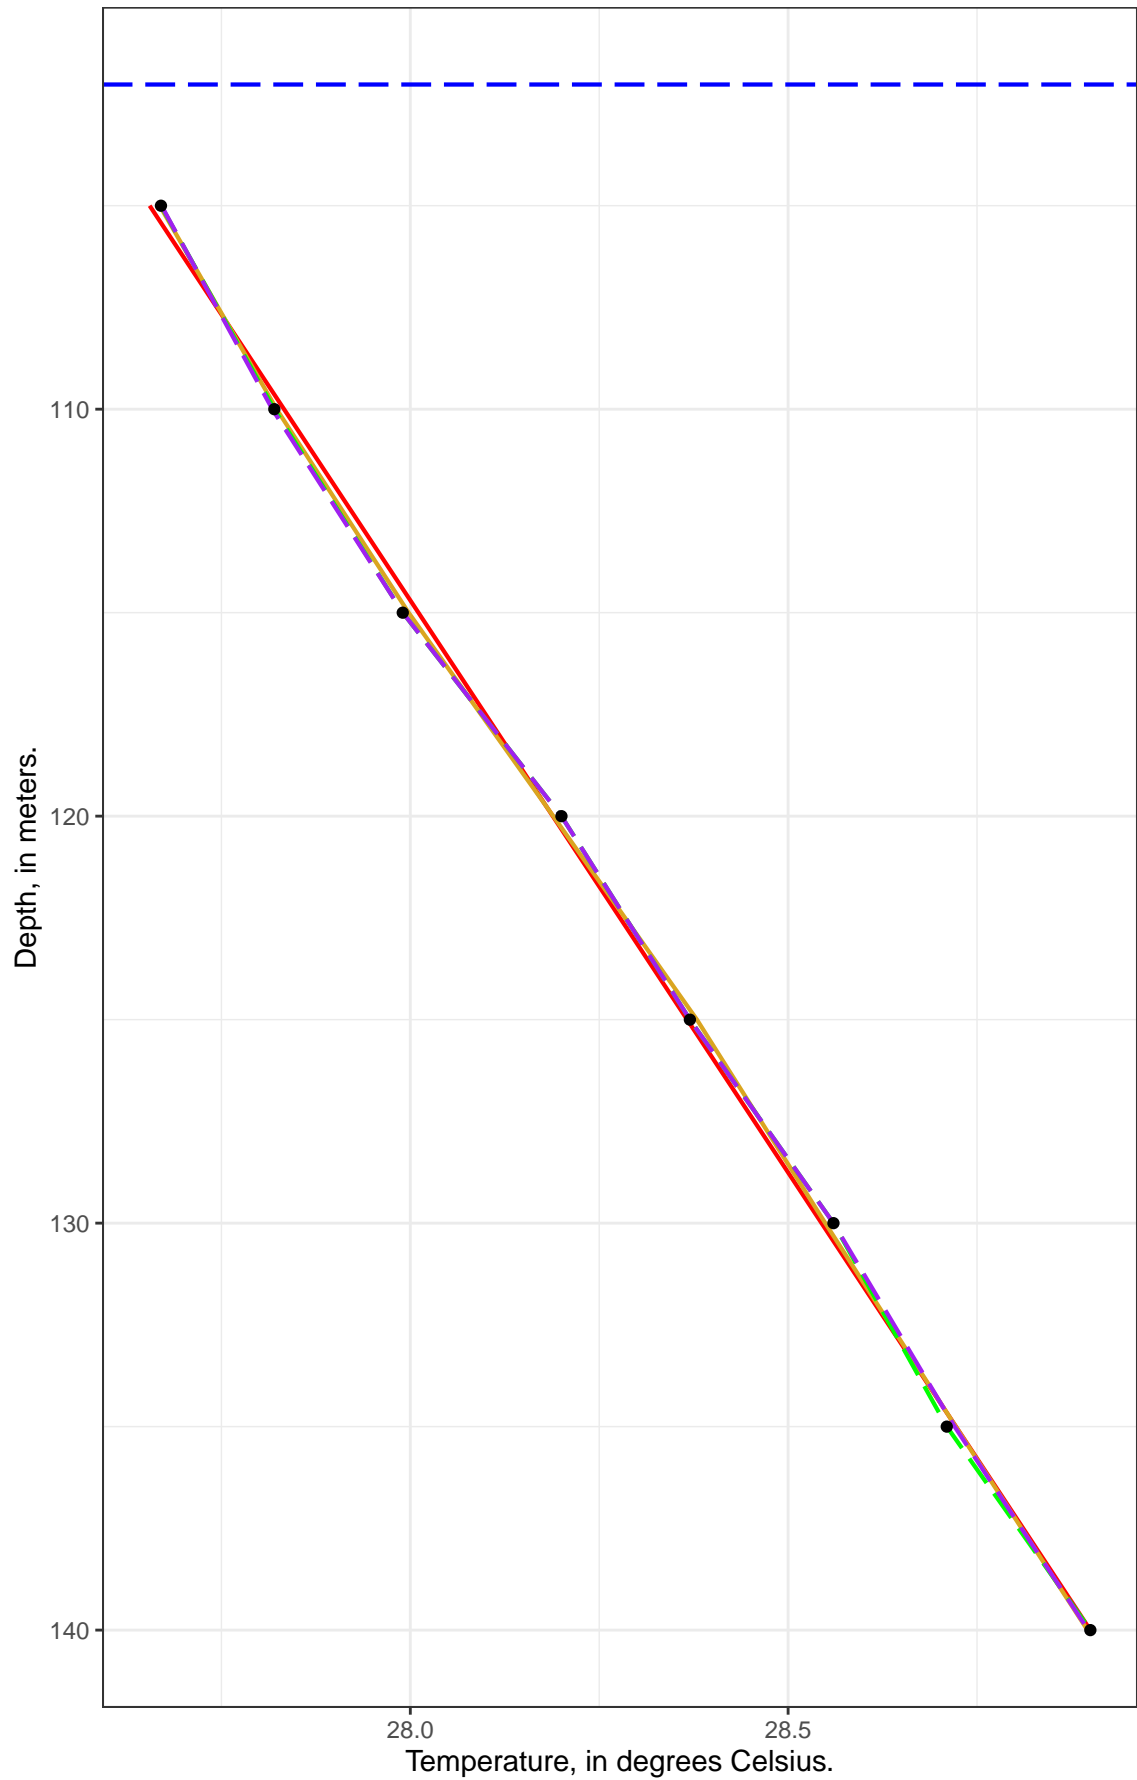

ID: 250 [ST-26] First Derivative

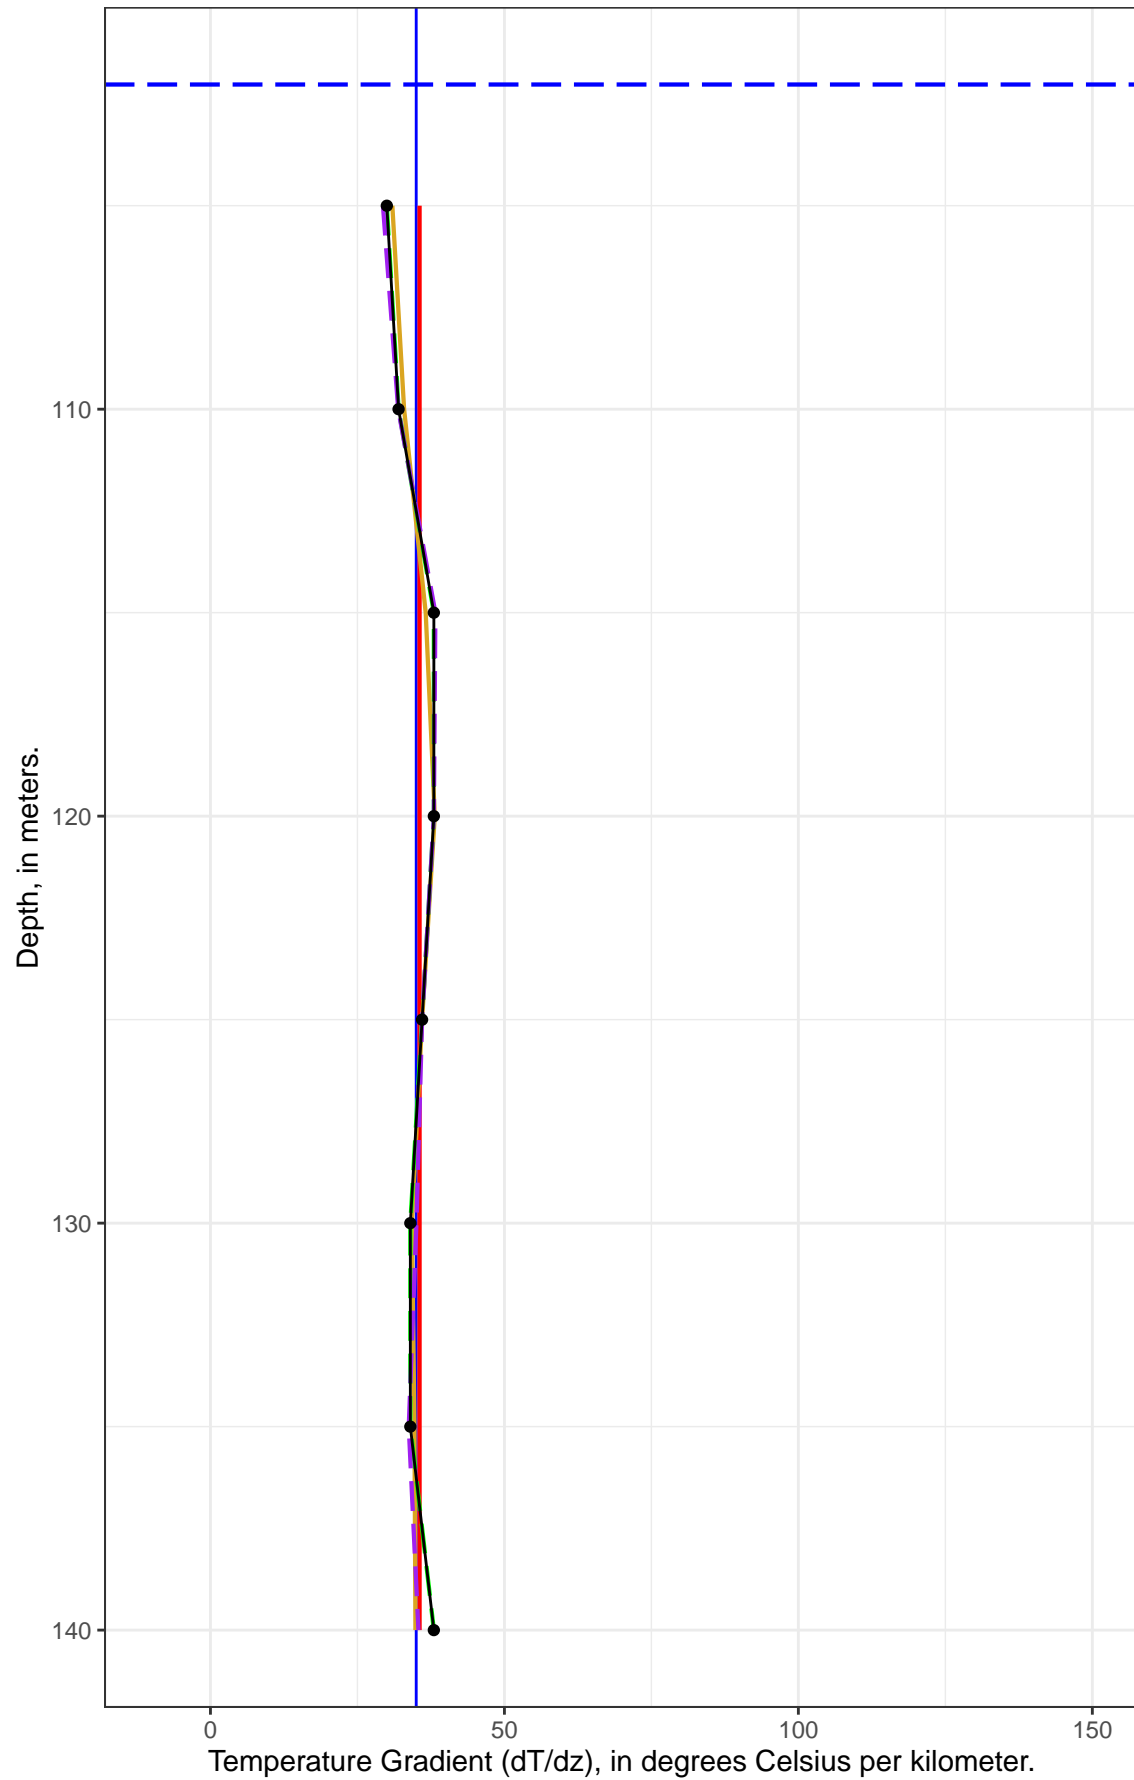

ID: 250 [ST-26] Second Derivative

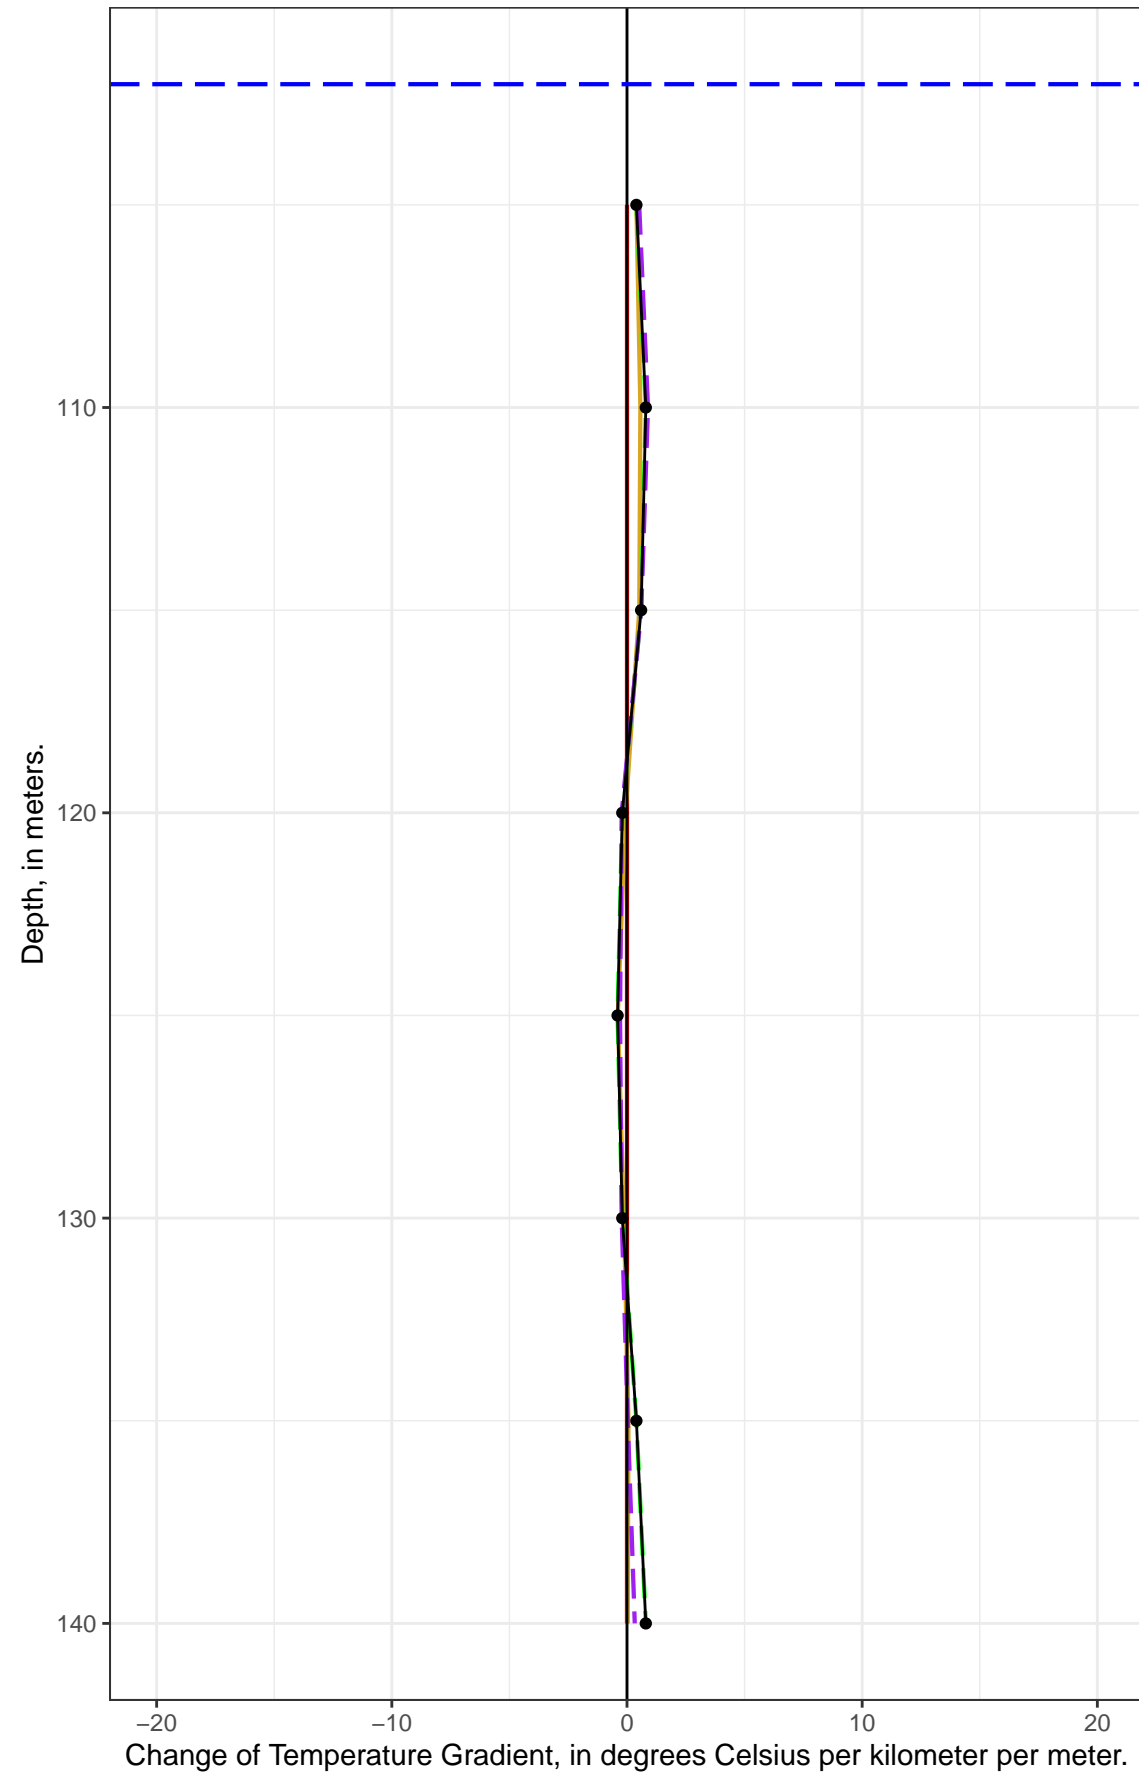

• Data — LOESS (AICC) — LOESS (constant) — LOESS (GCV) — Spline

• Data — LOESS (AICC) — LOESS (constant) — LOESS (GCV) — Spline

• Data — LOESS (AICC) — LOESS (constant) — LOESS (GCV) — Spline

ID: 252 [ST-28] Smoothed Profile

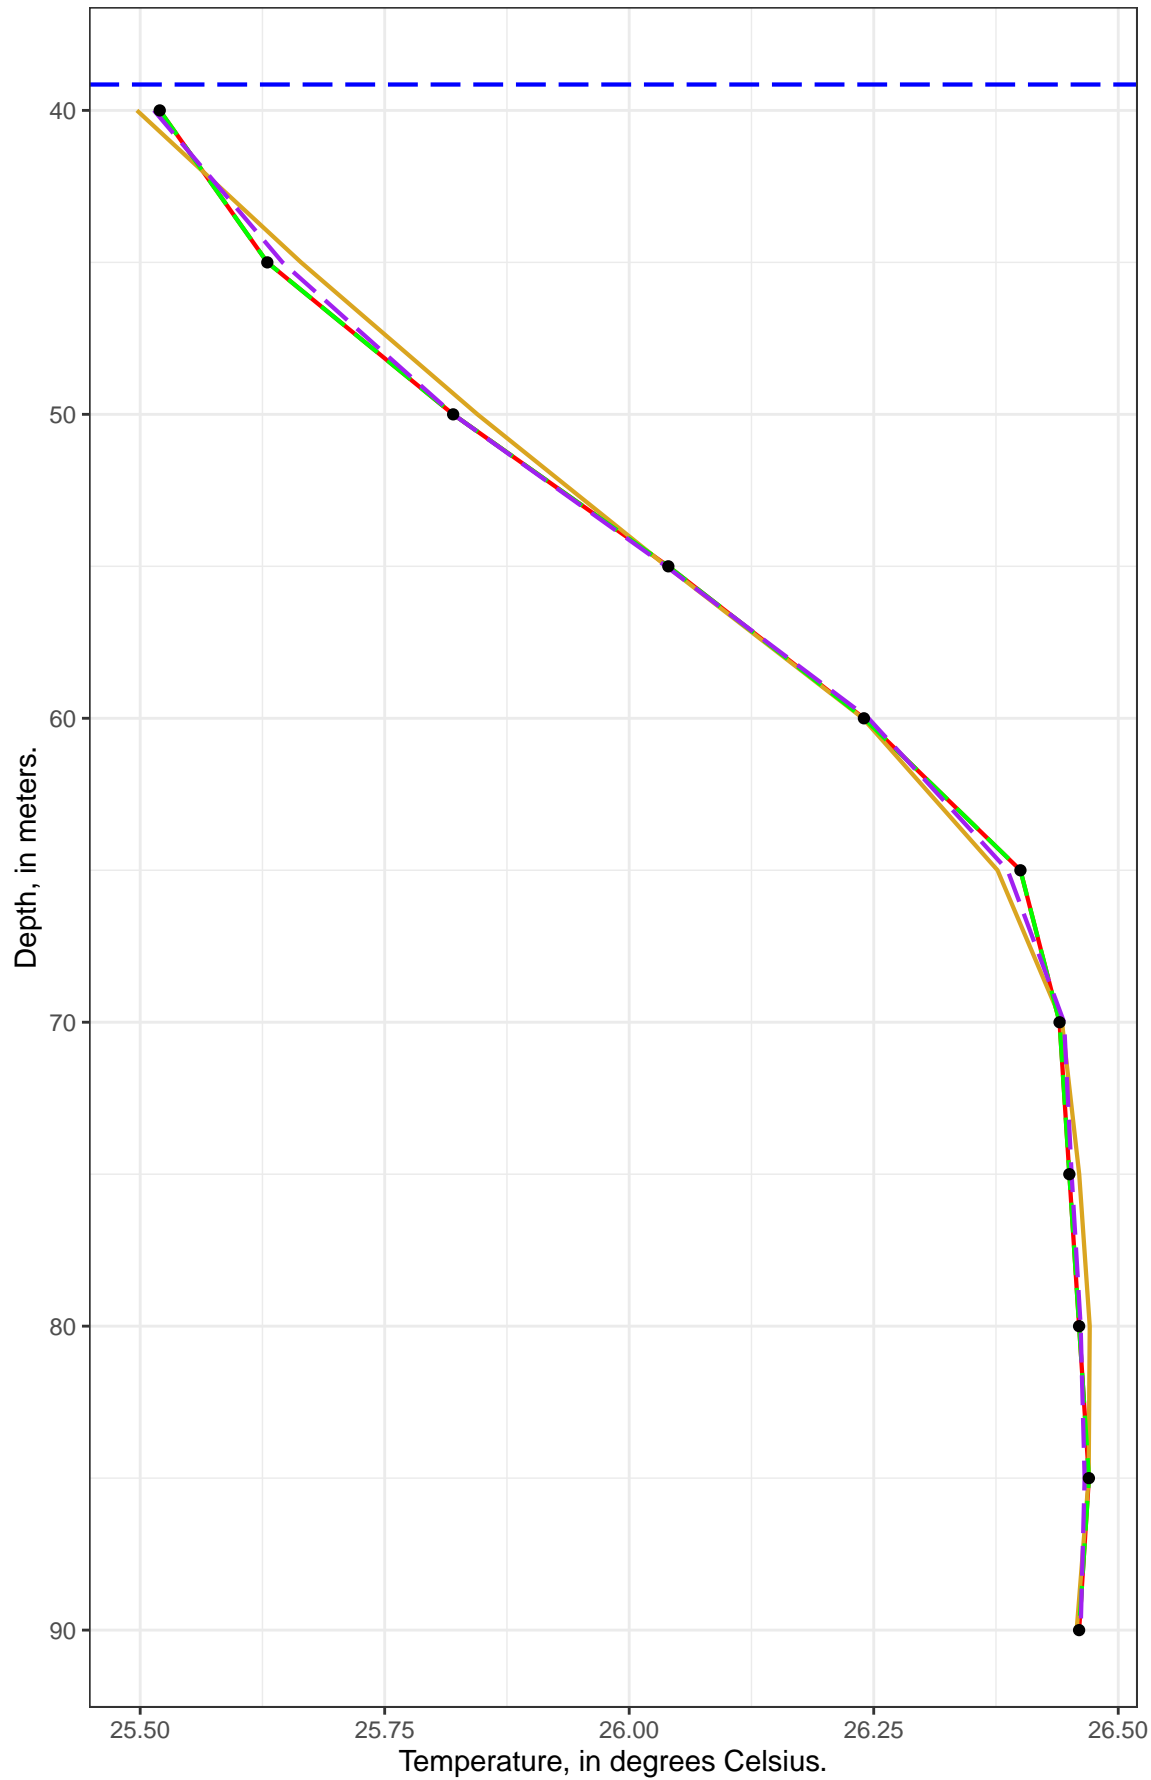

ID: 252 [ST-28] First Derivative

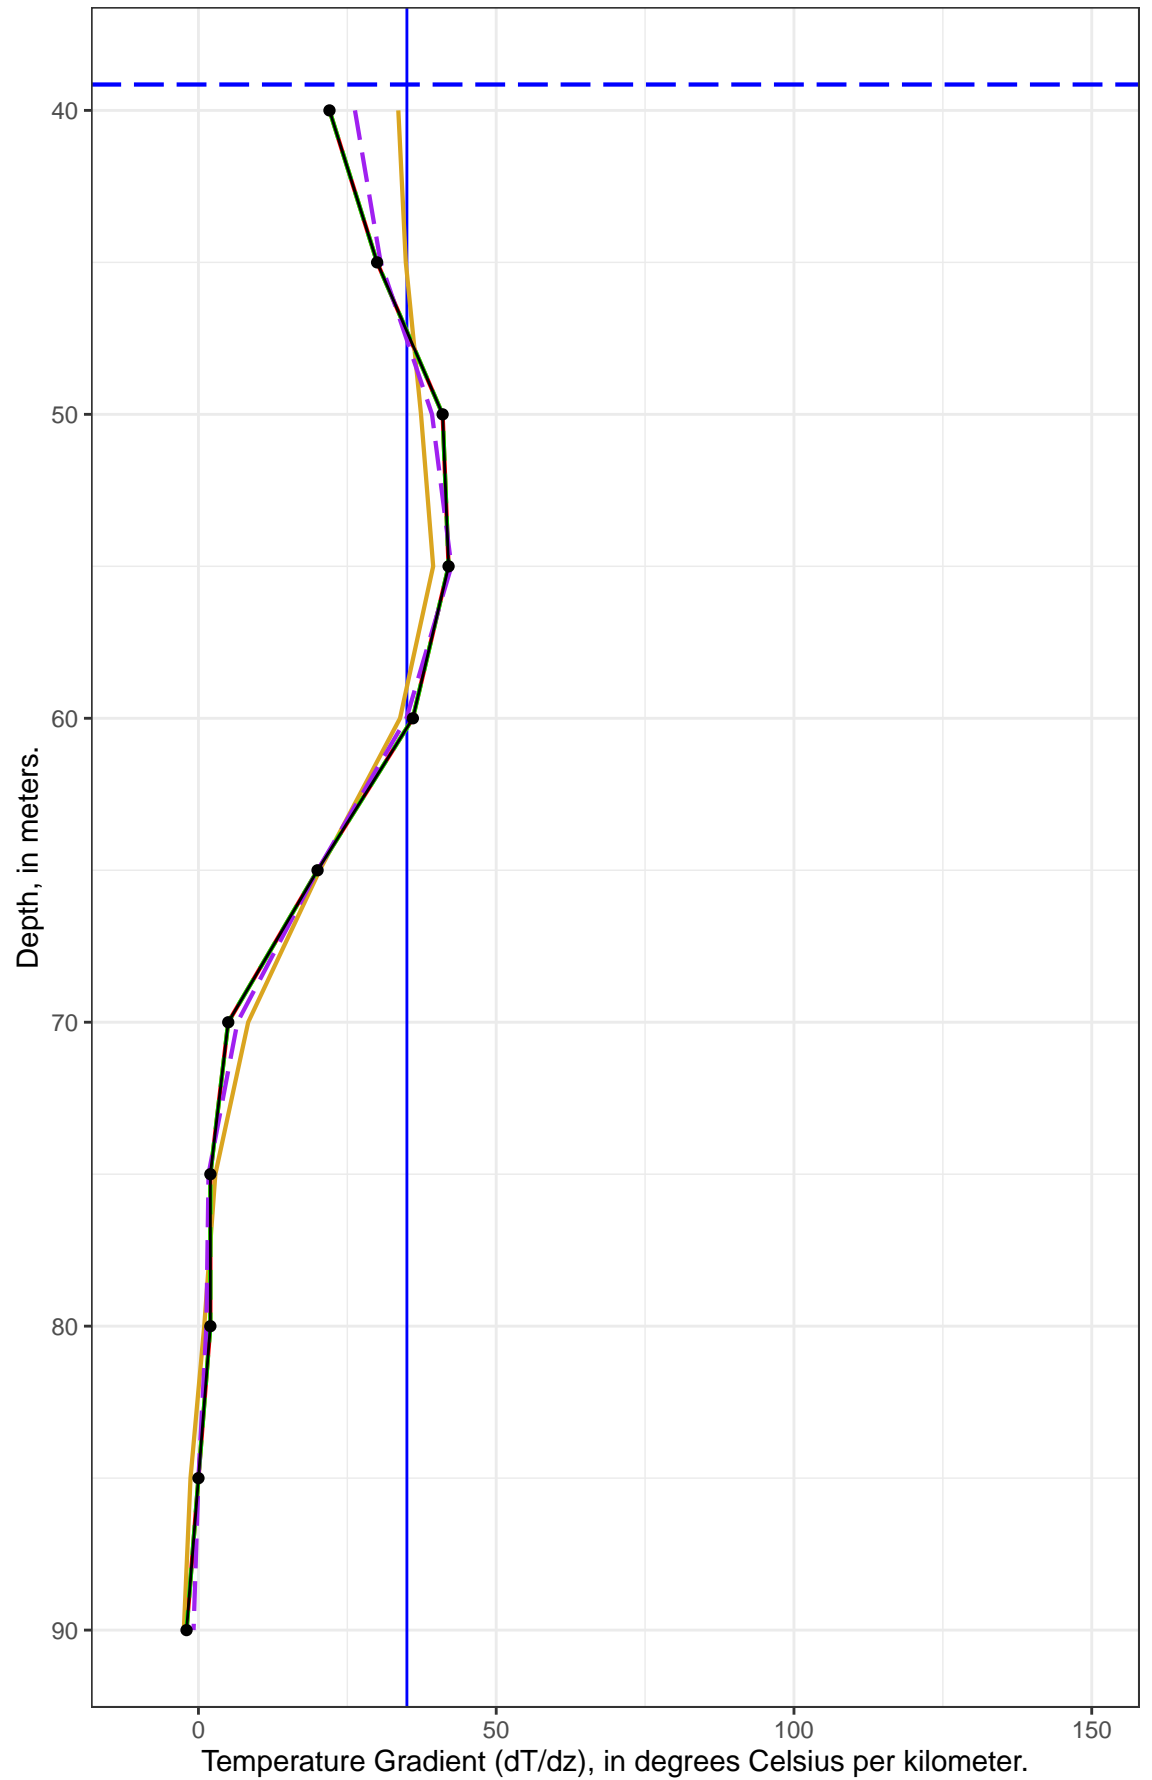

ID: 252 [ST-28] Second Derivative

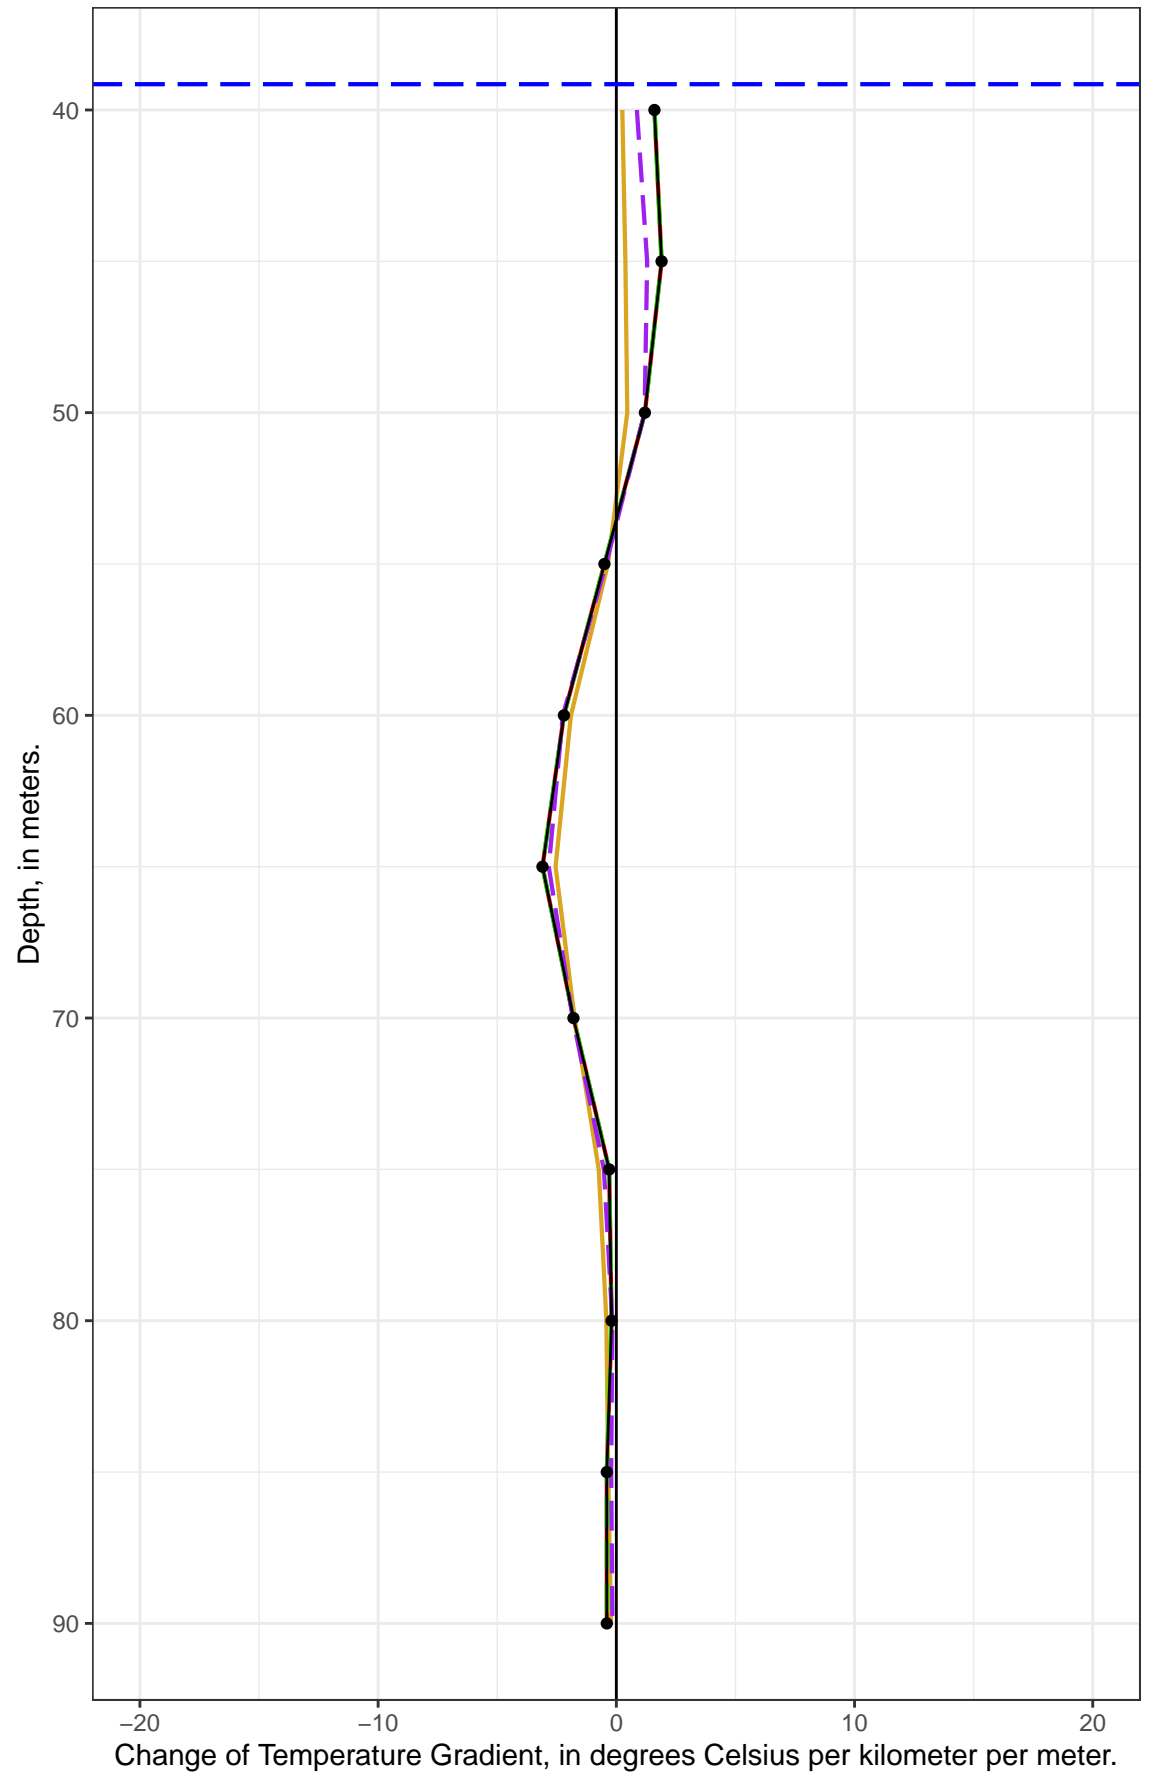

• Data • LOESS (AICC) • LOESS (constant) • LOESS (GCV) • Spline

• Data • LOESS (AICC) • LOESS (constant) • LOESS (GCV) • Spline

• Data • LOESS (AICC) • LOESS (constant) • LOESS (GCV) • Spline

ID: 253 [ST-29] Smoothed Profile

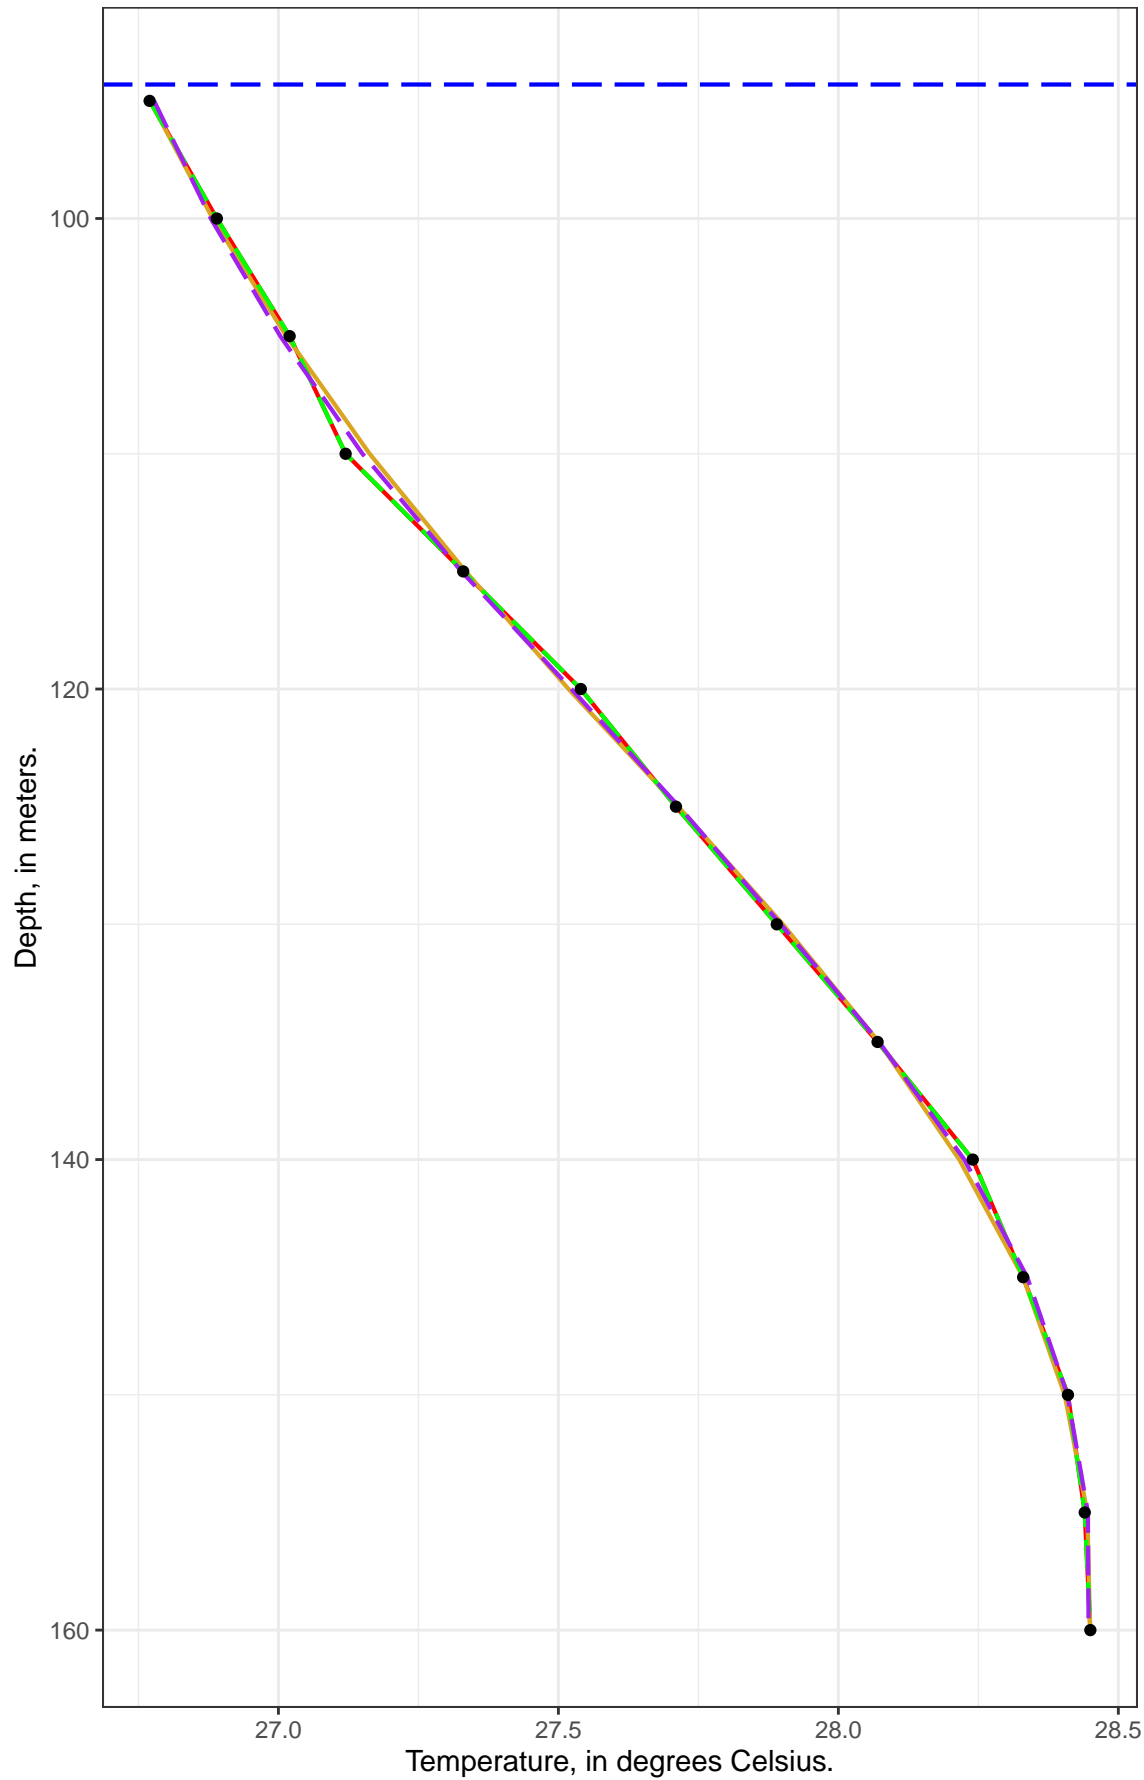

ID: 253 [ST-29] First Derivative

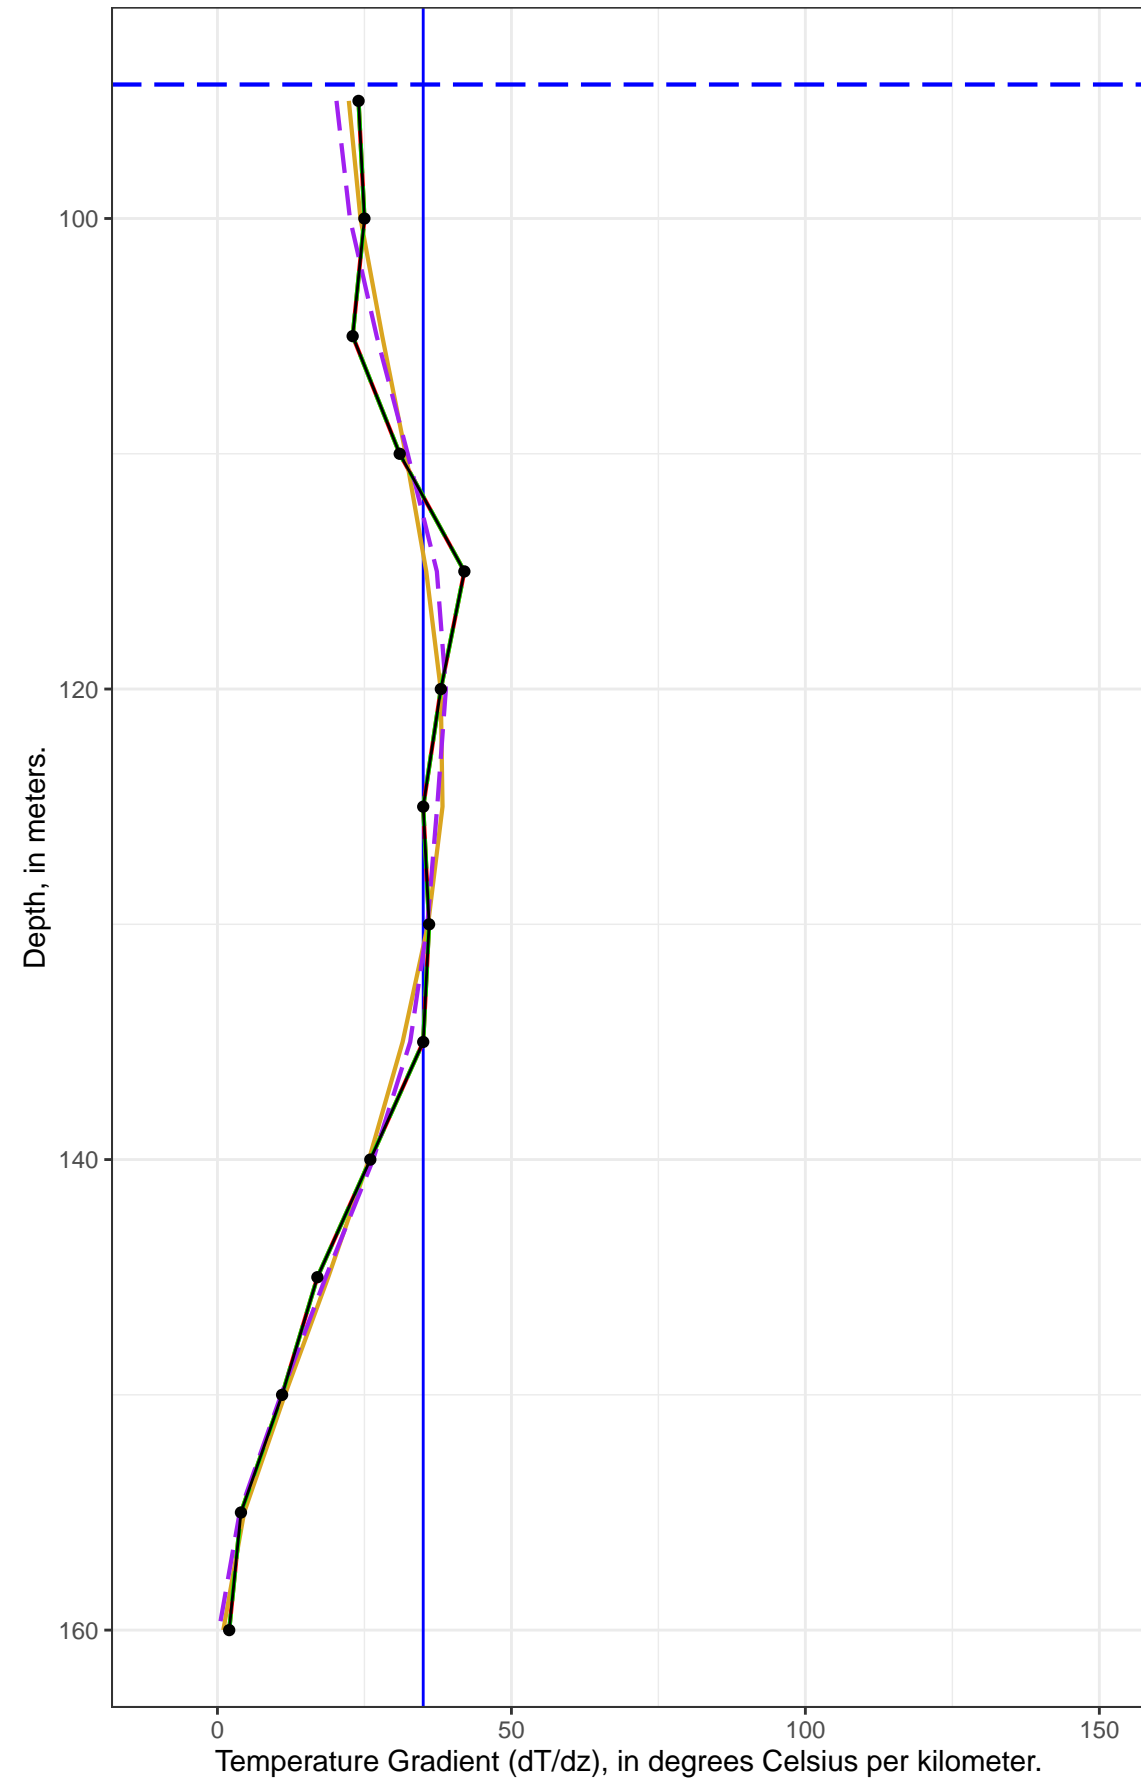

ID: 253 [ST-29] Second Derivative

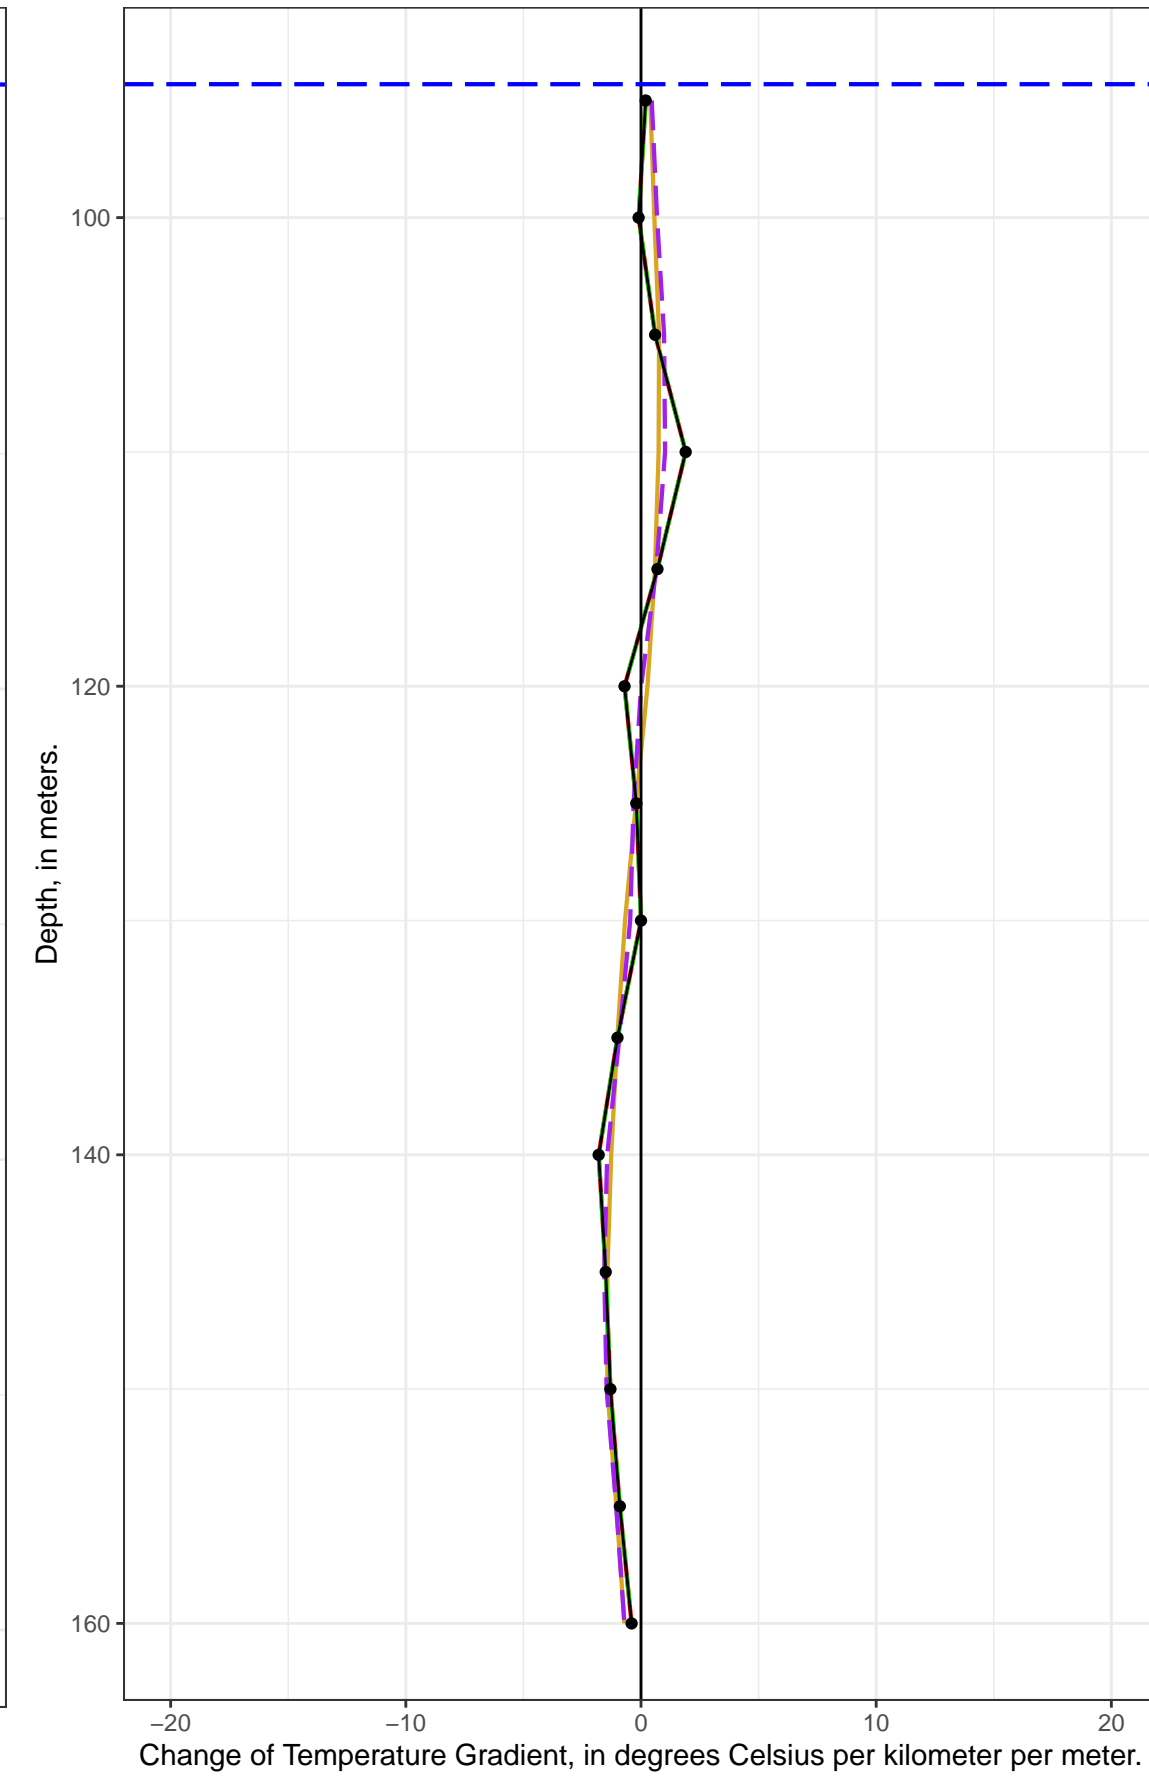

• Data — LOESS (AICC) — LOESS (constant) — LOESS (GCV) — Spline

• Data — LOESS (AICC) — LOESS (constant) — LOESS (GCV) — Spline

• Data — LOESS (AICC) — LOESS (constant) — LOESS (GCV) — Spline

ID: 254 [ST-3] Smoothed Profile

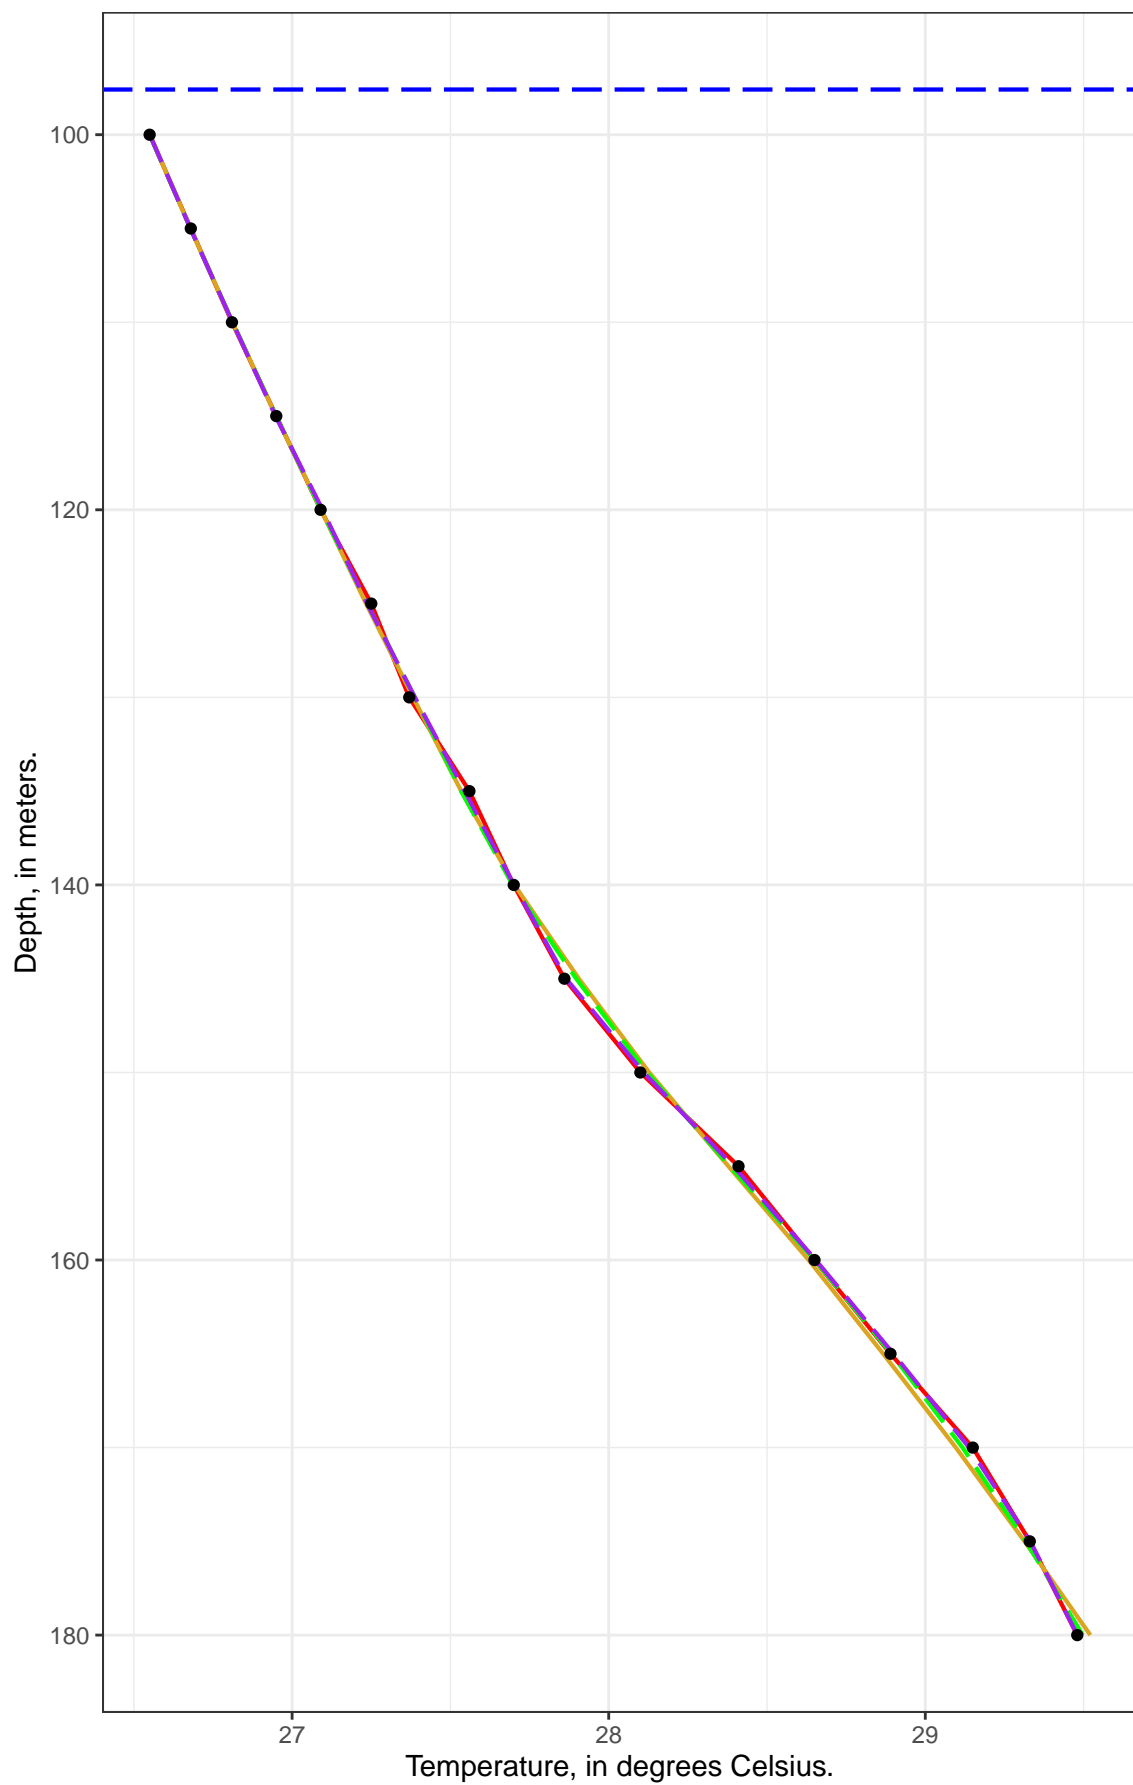

ID: 254 [ST-3] First Derivative

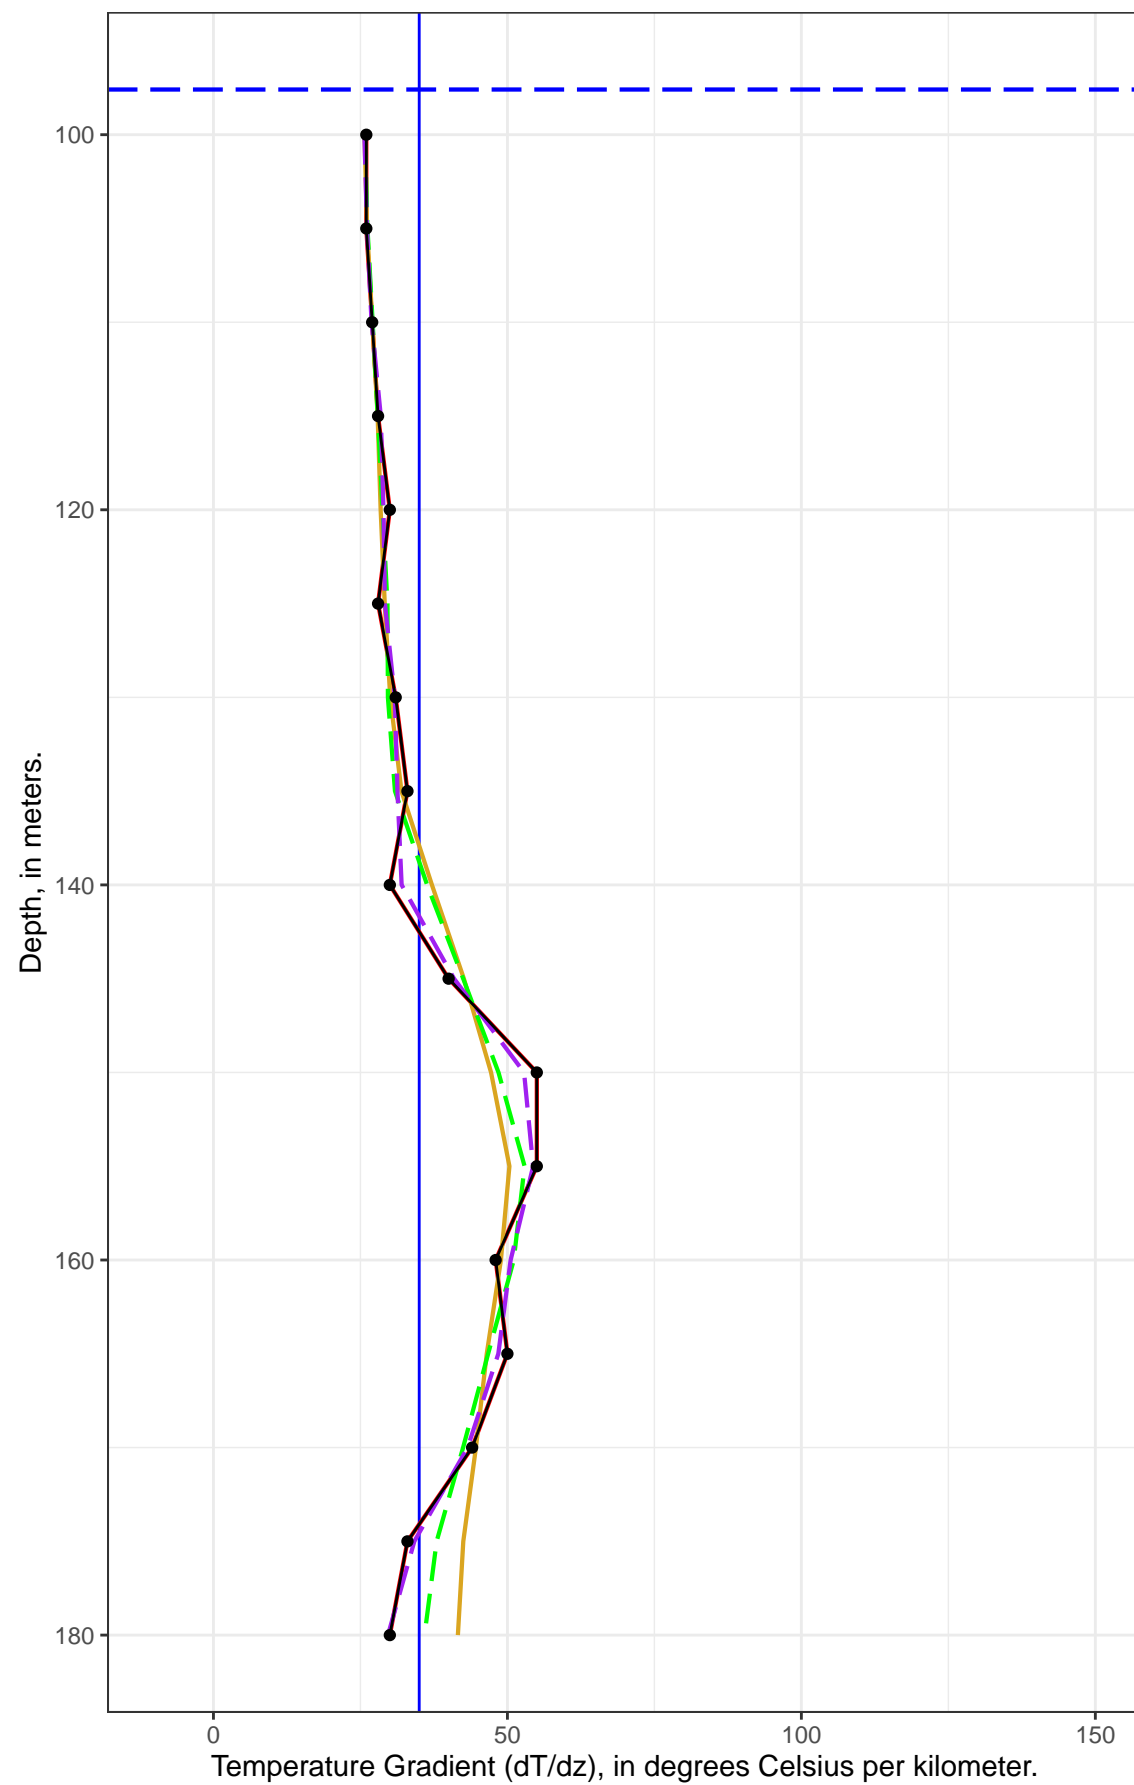

ID: 254 [ST-3] Second Derivative

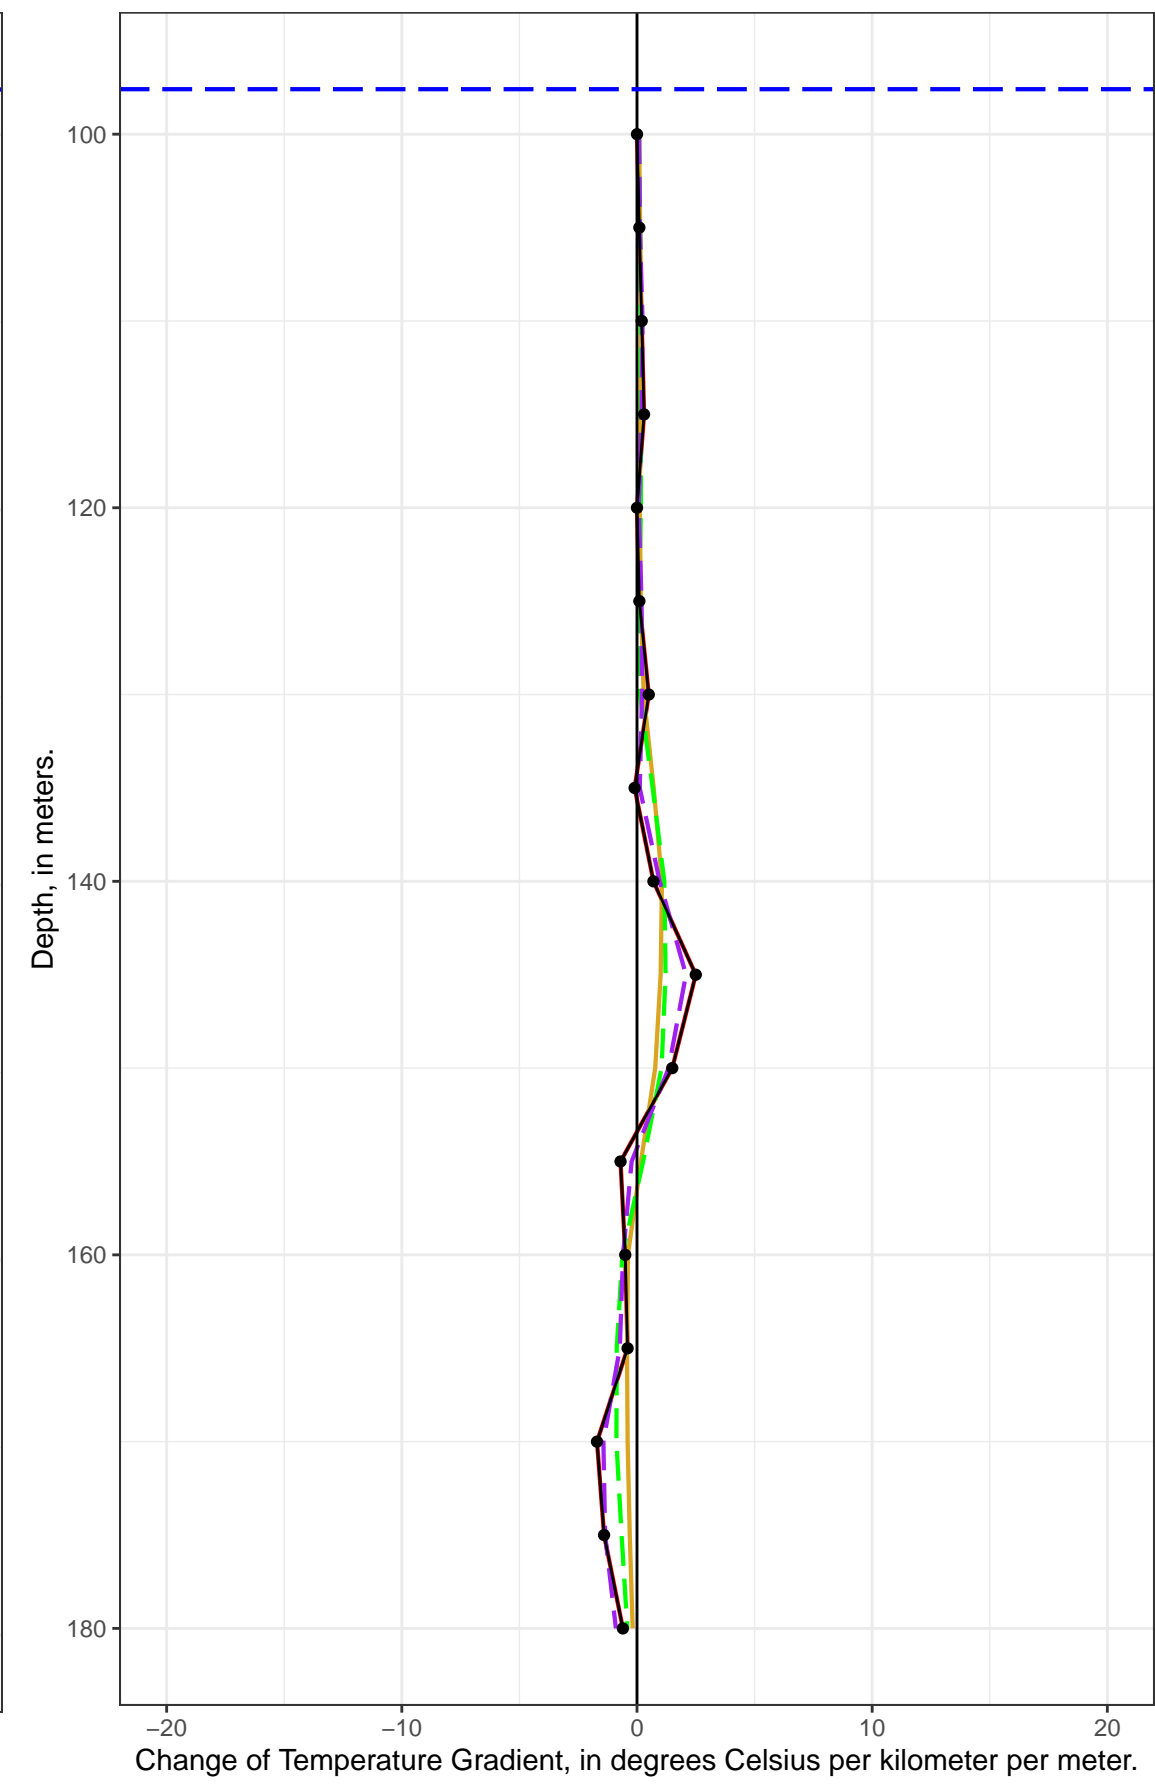

• Data — LOESS (AICC) — LOESS (constant) — LOESS (GCV) — Spline

• Data — LOESS (AICC) — LOESS (constant) — LOESS (GCV) — Spline

• Data — LOESS (AICC) — LOESS (constant) — LOESS (GCV) — Spline

ID: 255 [ST-30] Smoothed Profile

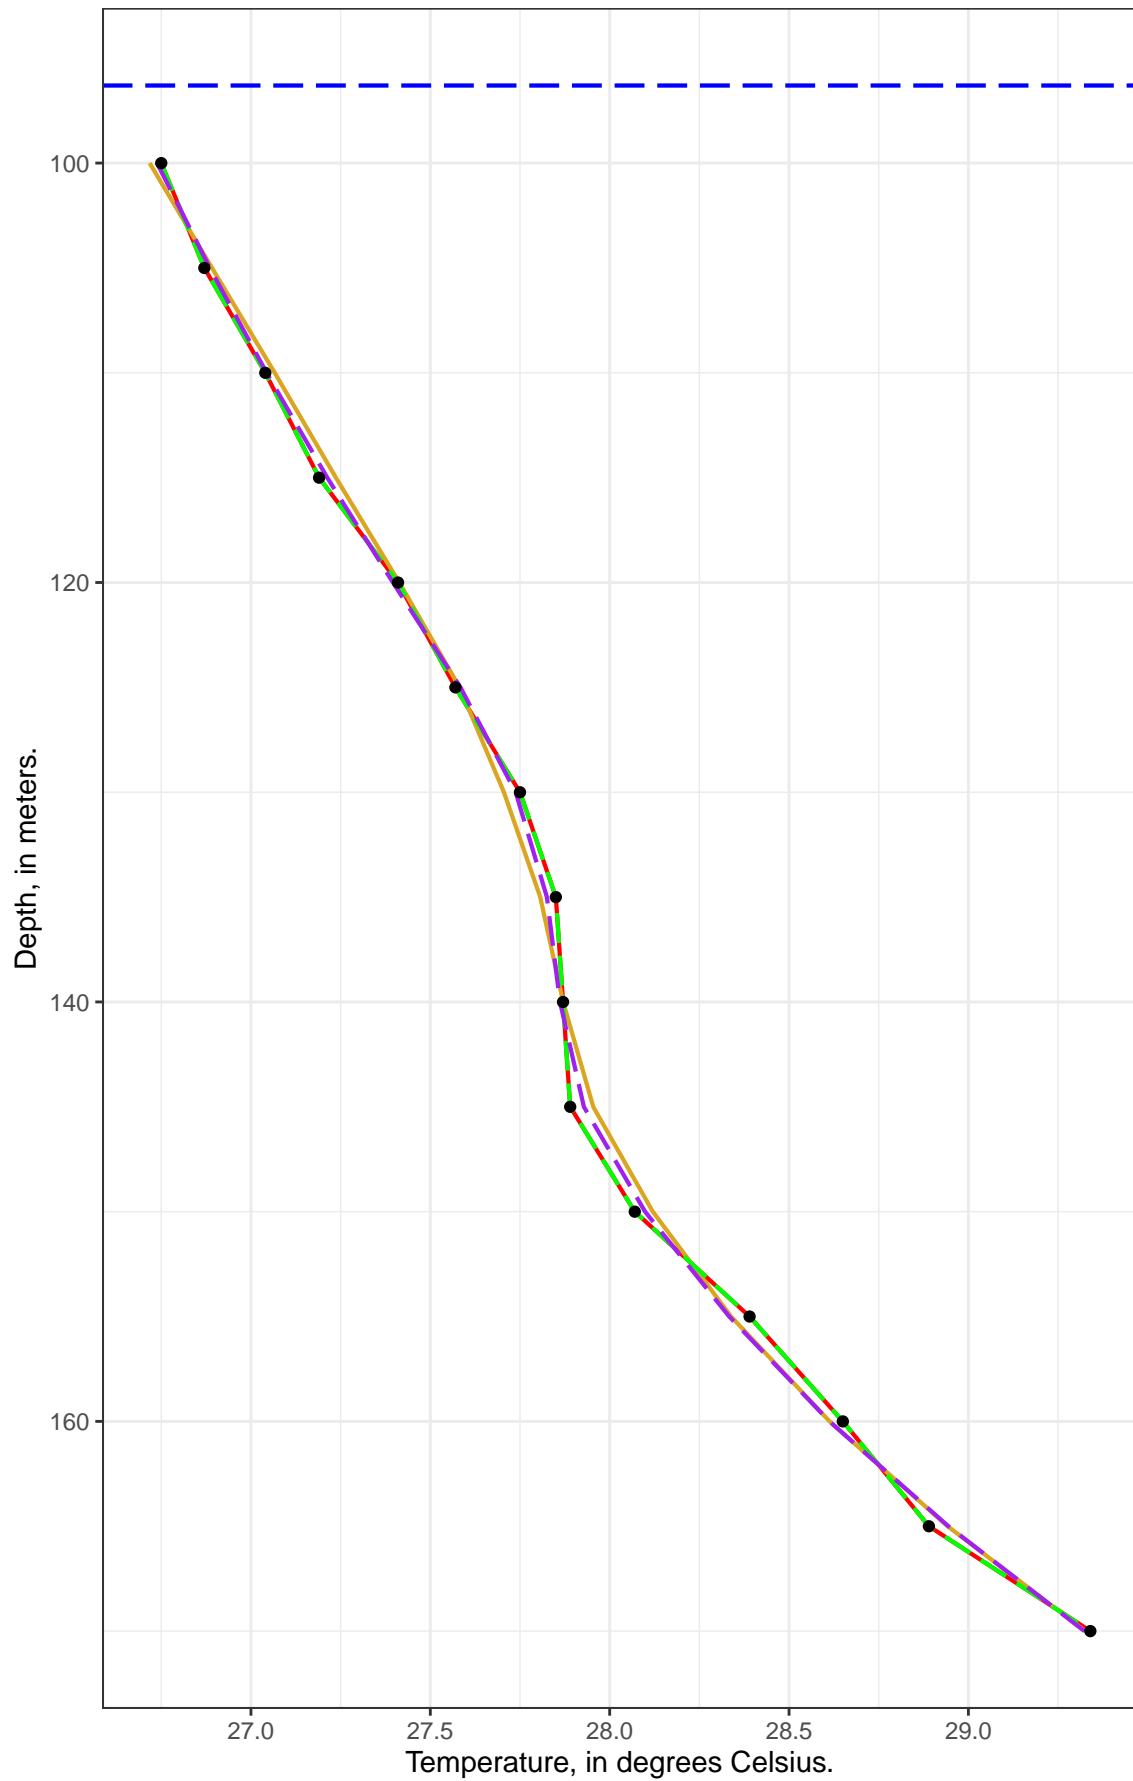

ID: 255 [ST-30] First Derivative

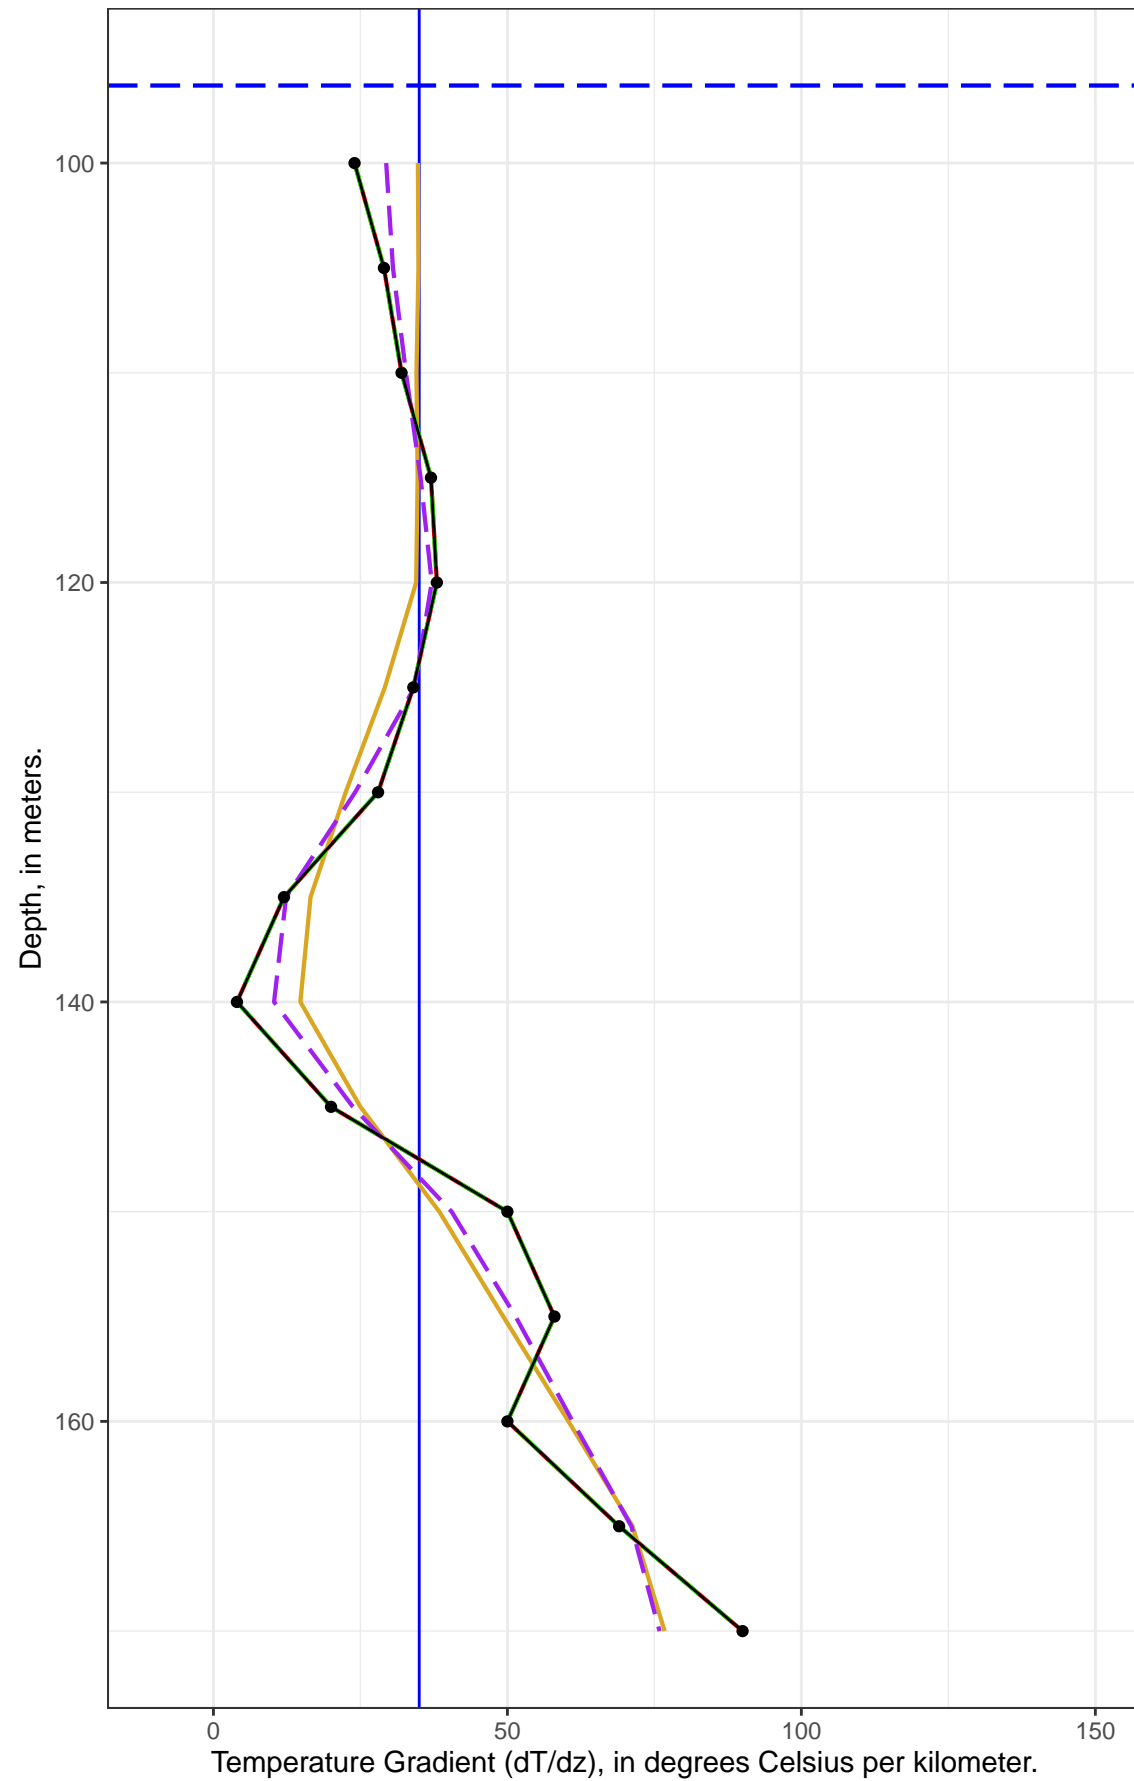

ID: 255 [ST-30] Second Derivative

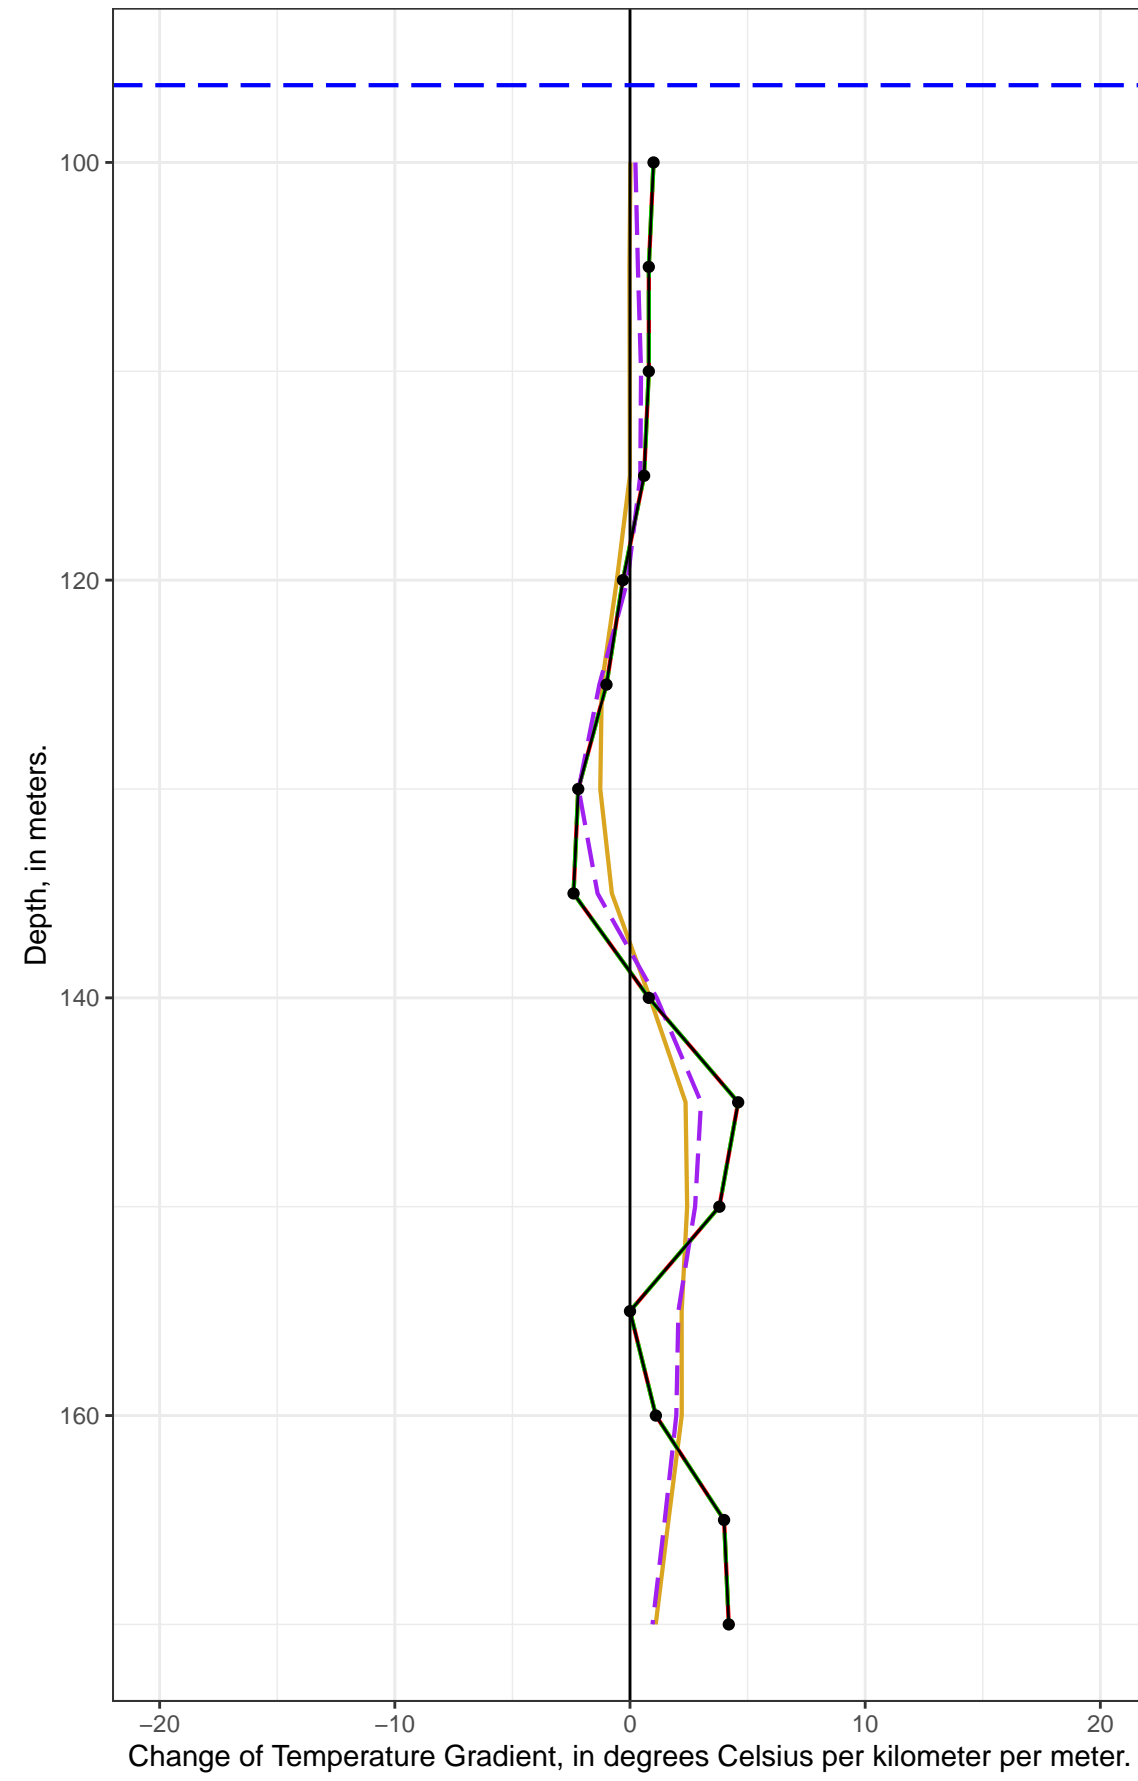

• Data — LOESS (AICC) — LOESS (constant) — LOESS (GCV) — Spline

• Data — LOESS (AICC) — LOESS (constant) — LOESS (GCV) — Spline

• Data — LOESS (AICC) — LOESS (constant) — LOESS (GCV) — Spline

ID: 256 [ST-31] Smoothed Profile

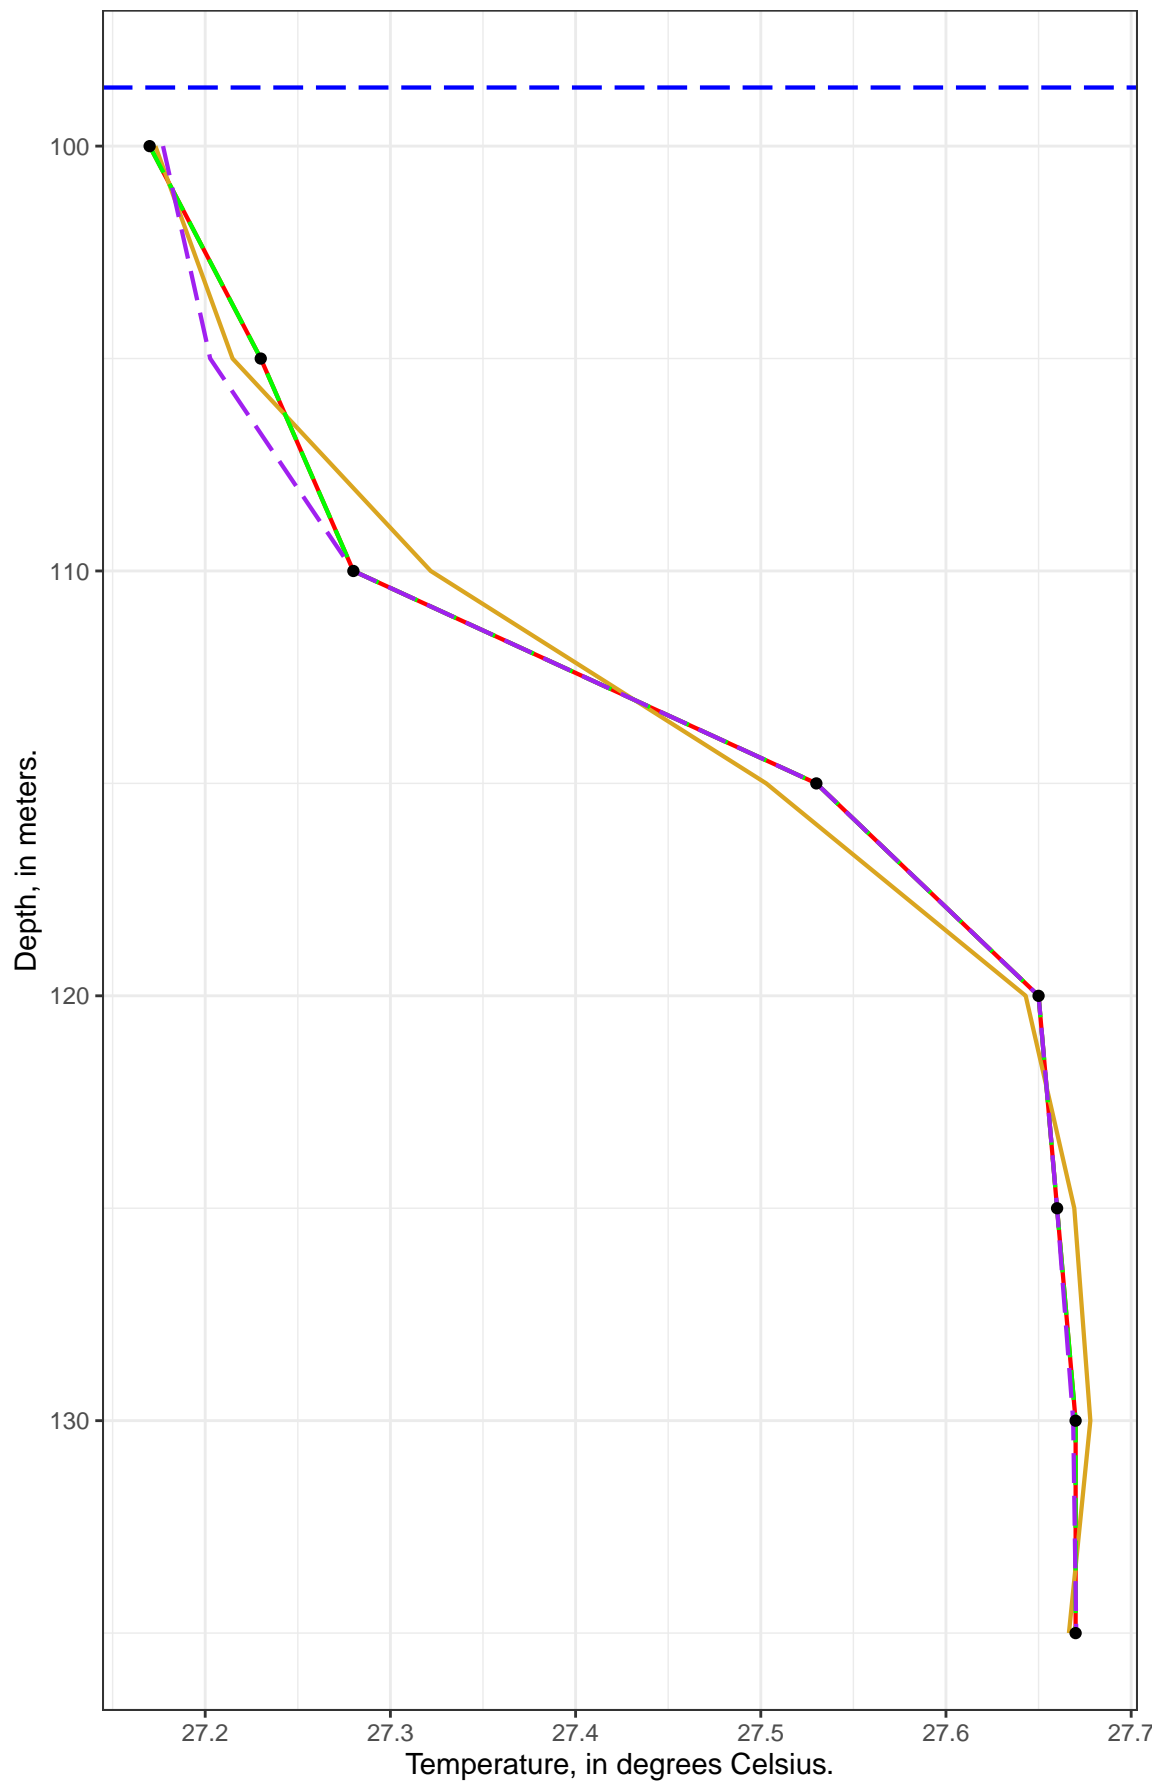

ID: 256 [ST-31] First Derivative

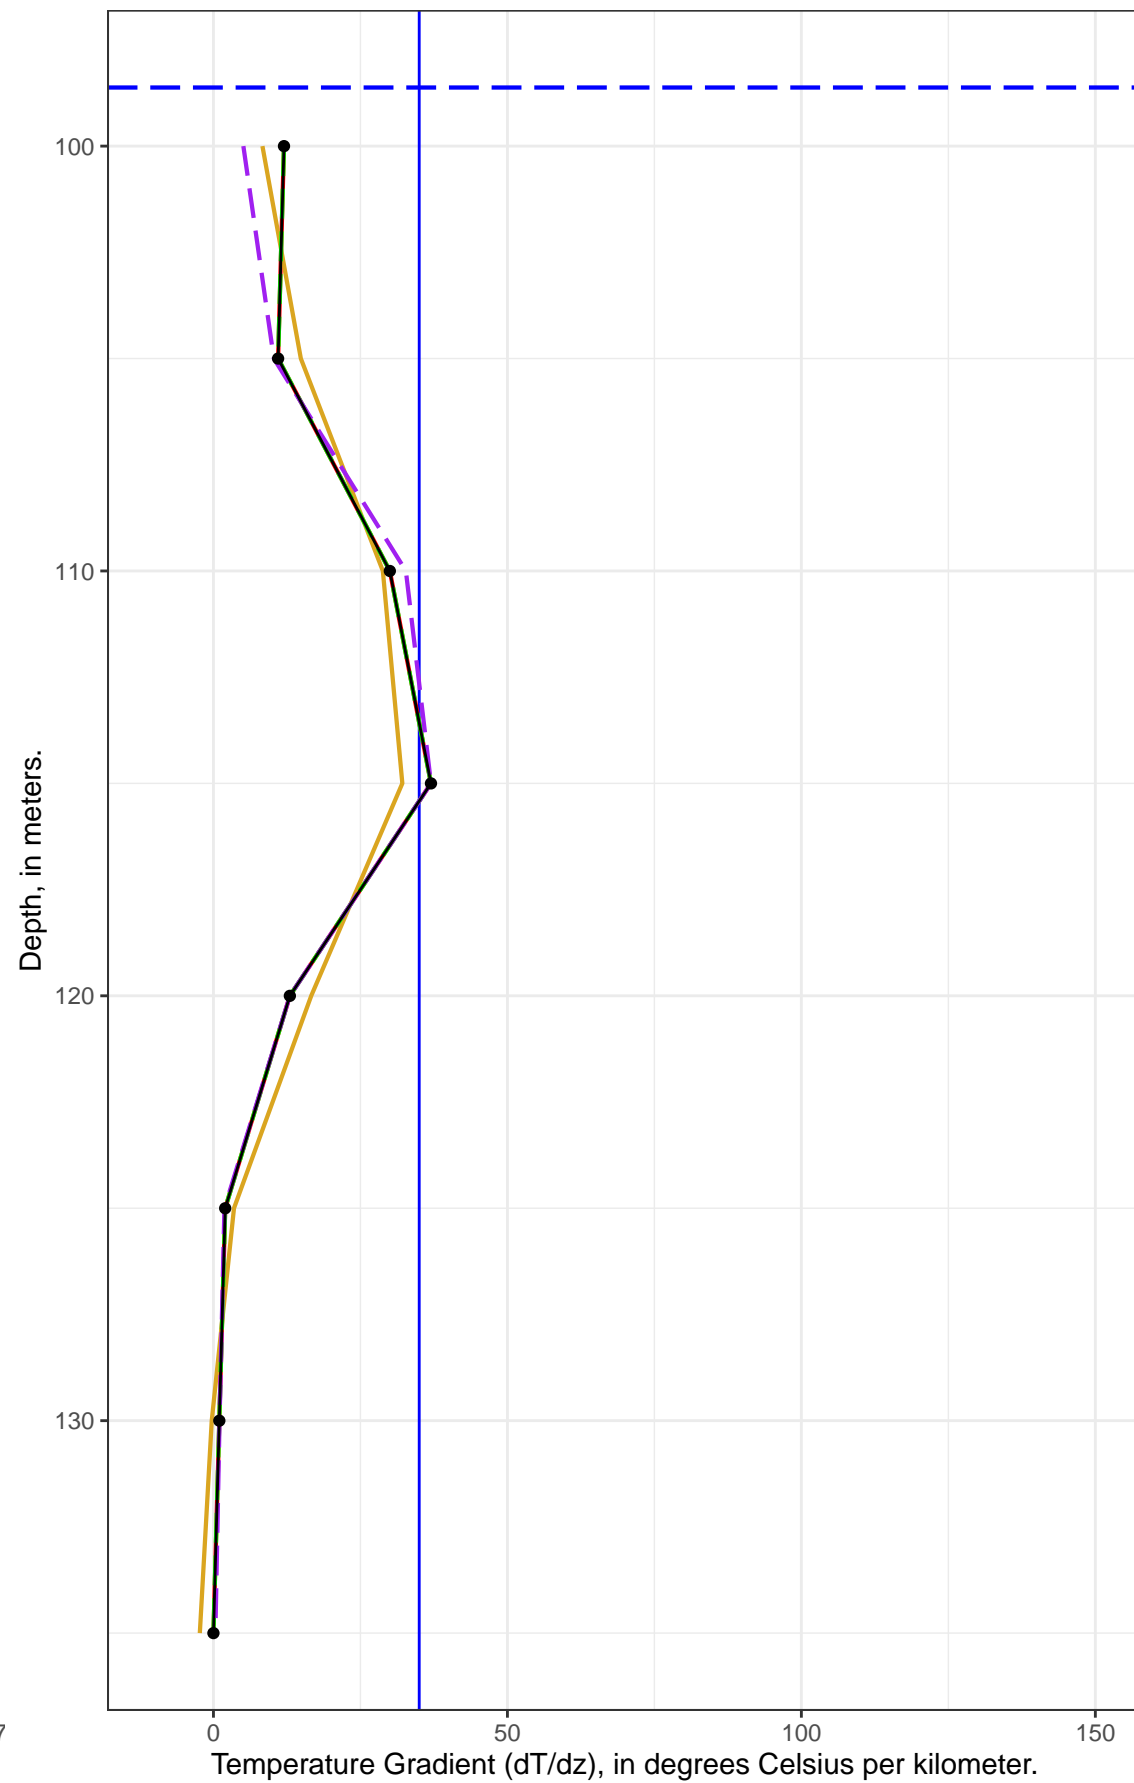

ID: 256 [ST-31] Second Derivative

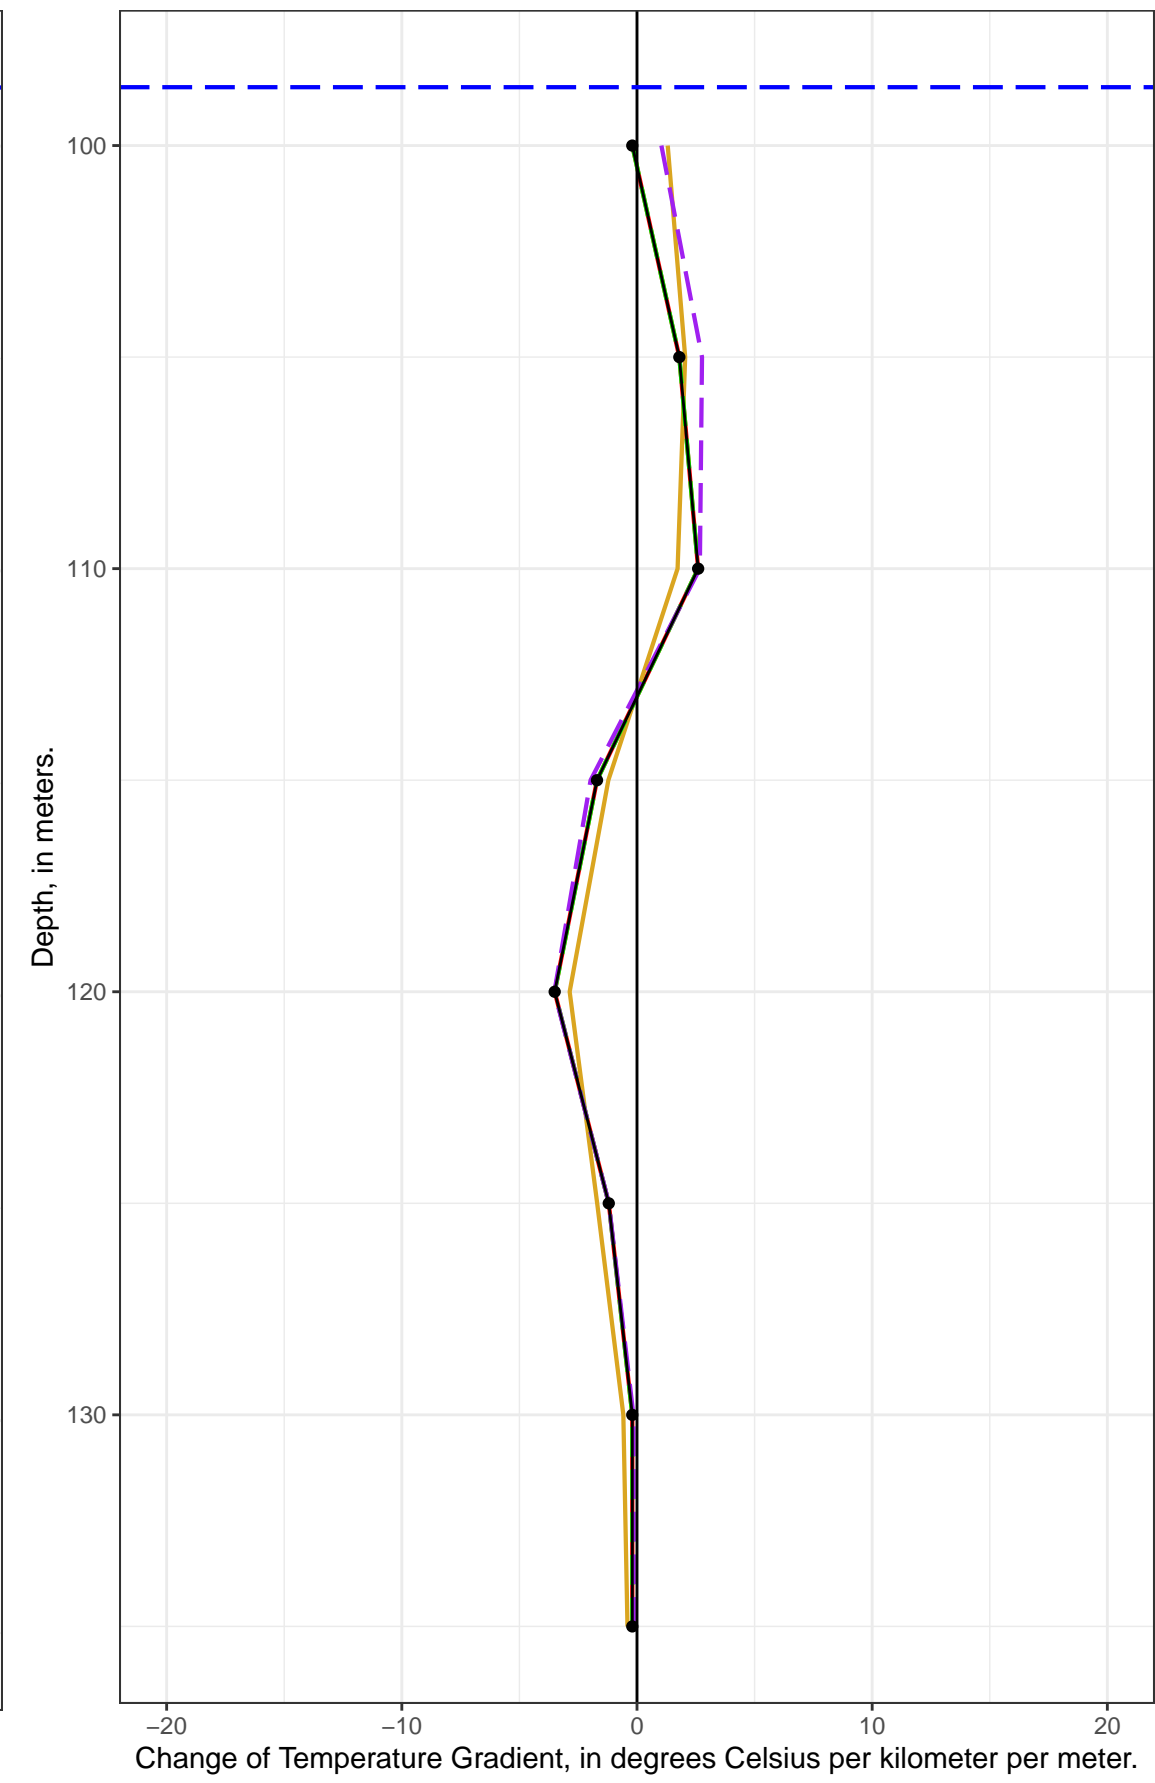

• Data • LOESS (AICC) • LOESS (constant) • LOESS (GCV) • Spline

• Data • LOESS (AICC) • LOESS (constant) • LOESS (GCV) • Spline

• Data • LOESS (AICC) • LOESS (constant) • LOESS (GCV) • Spline

ID: 257 [ST-5] Smoothed Profile

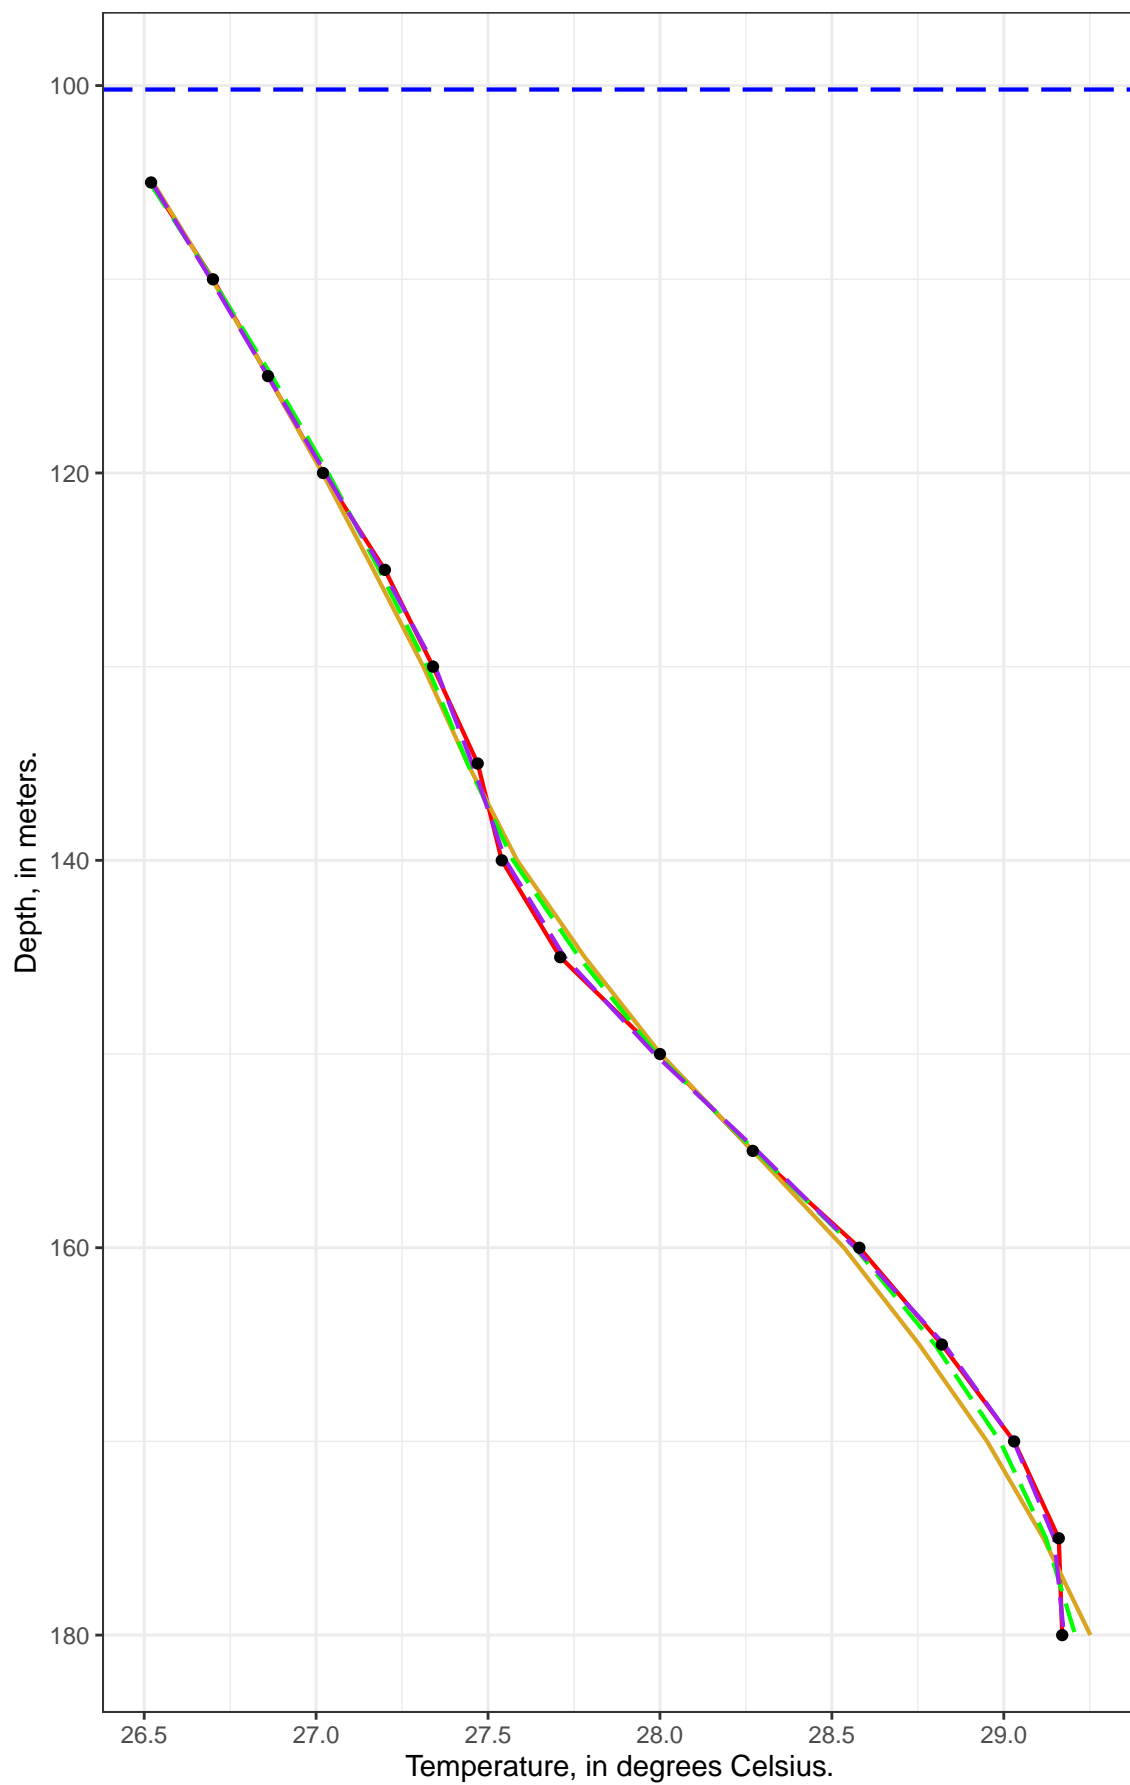

ID: 257 [ST-5] First Derivative

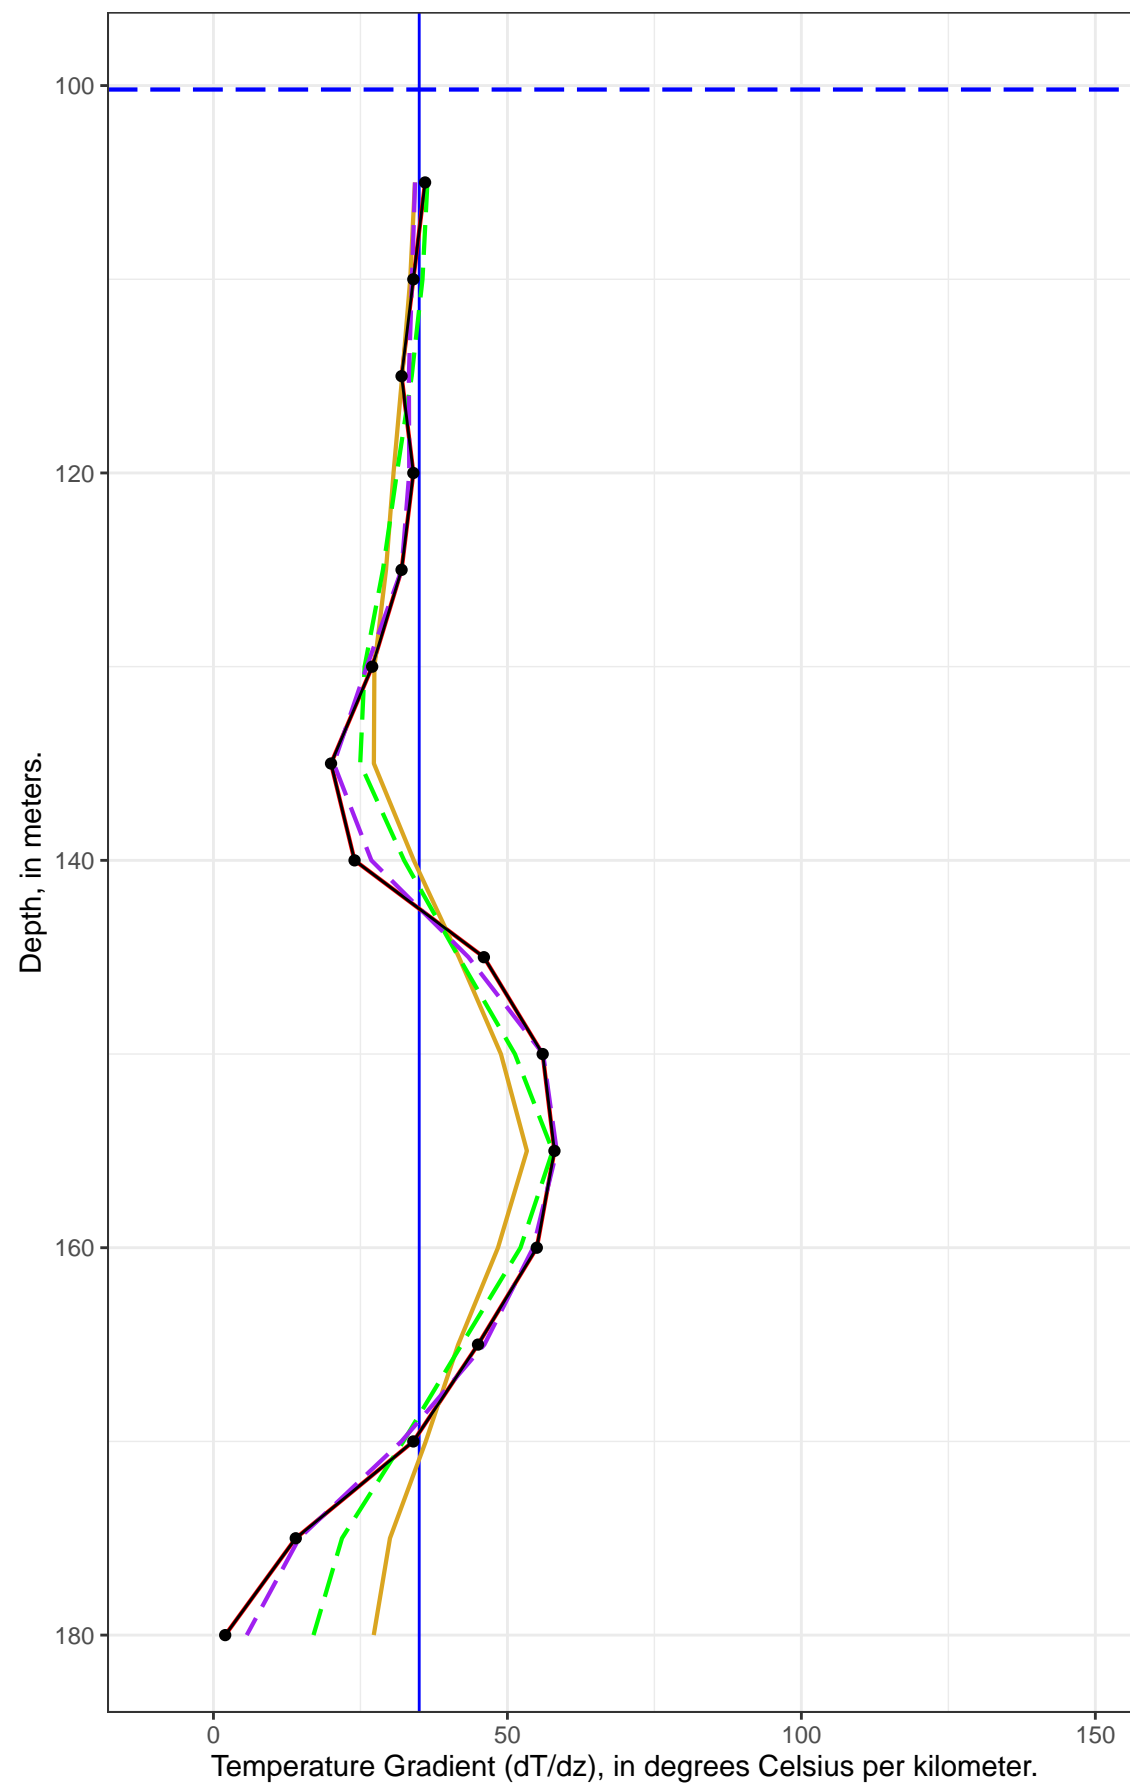

ID: 257 [ST-5] Second Derivative

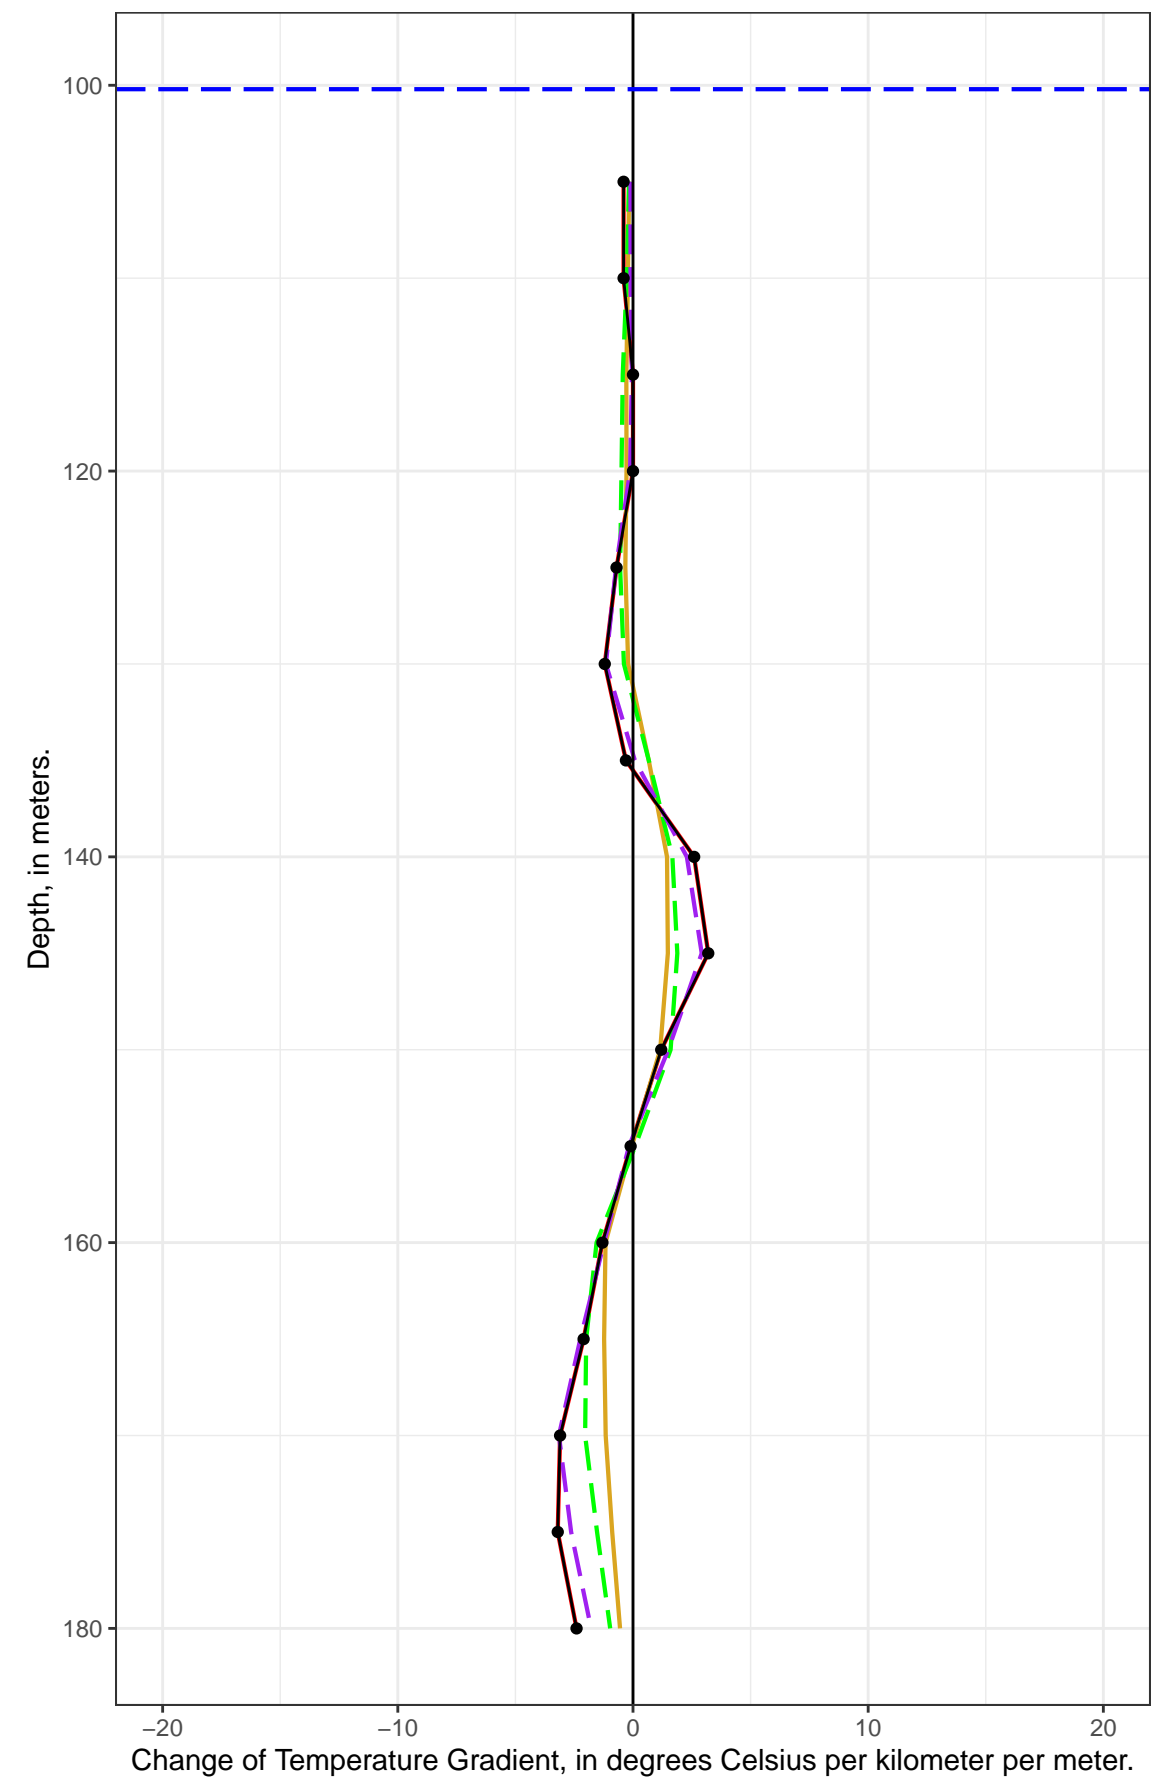

• Data — LOESS (AICC) — LOESS (constant) — LOESS (GCV) — Spline

• Data — LOESS (AICC) — LOESS (constant) — LOESS (GCV) — Spline

• Data — LOESS (AICC) — LOESS (constant) — LOESS (GCV) — Spline



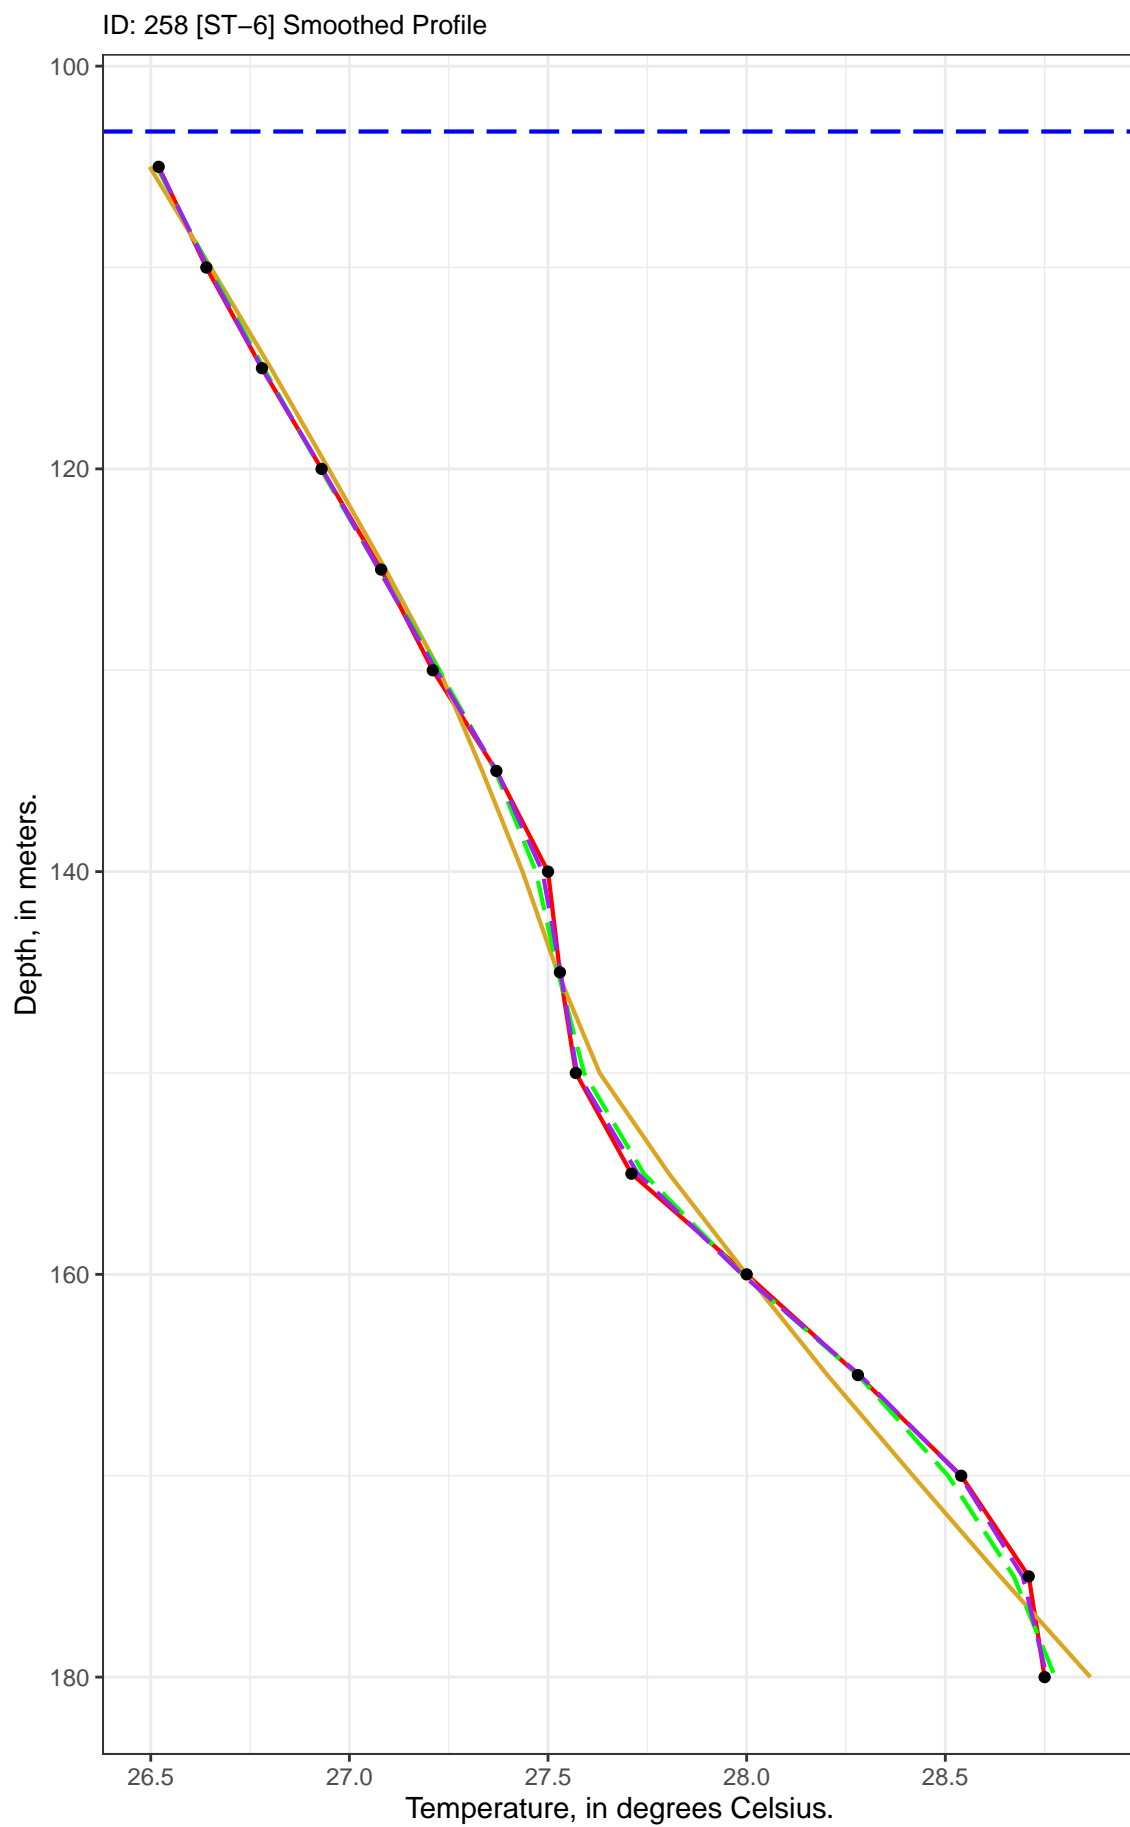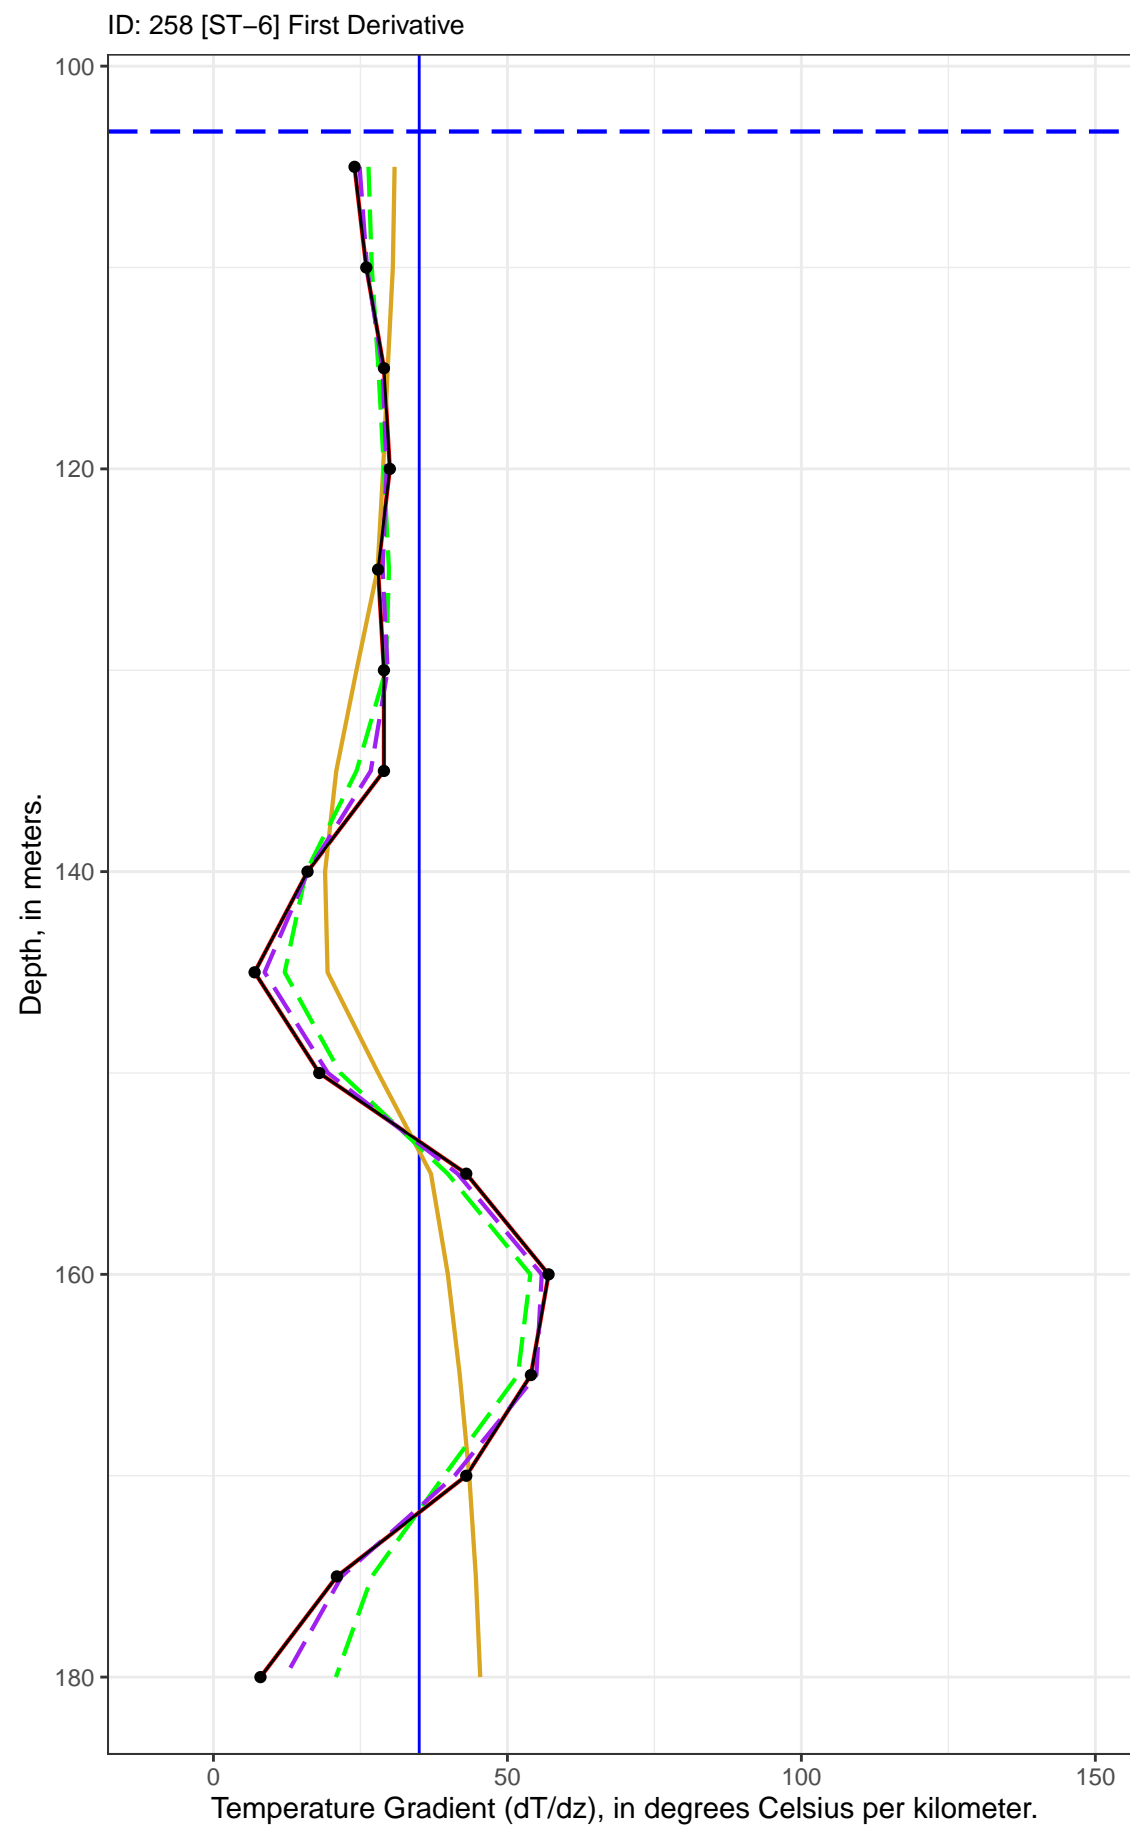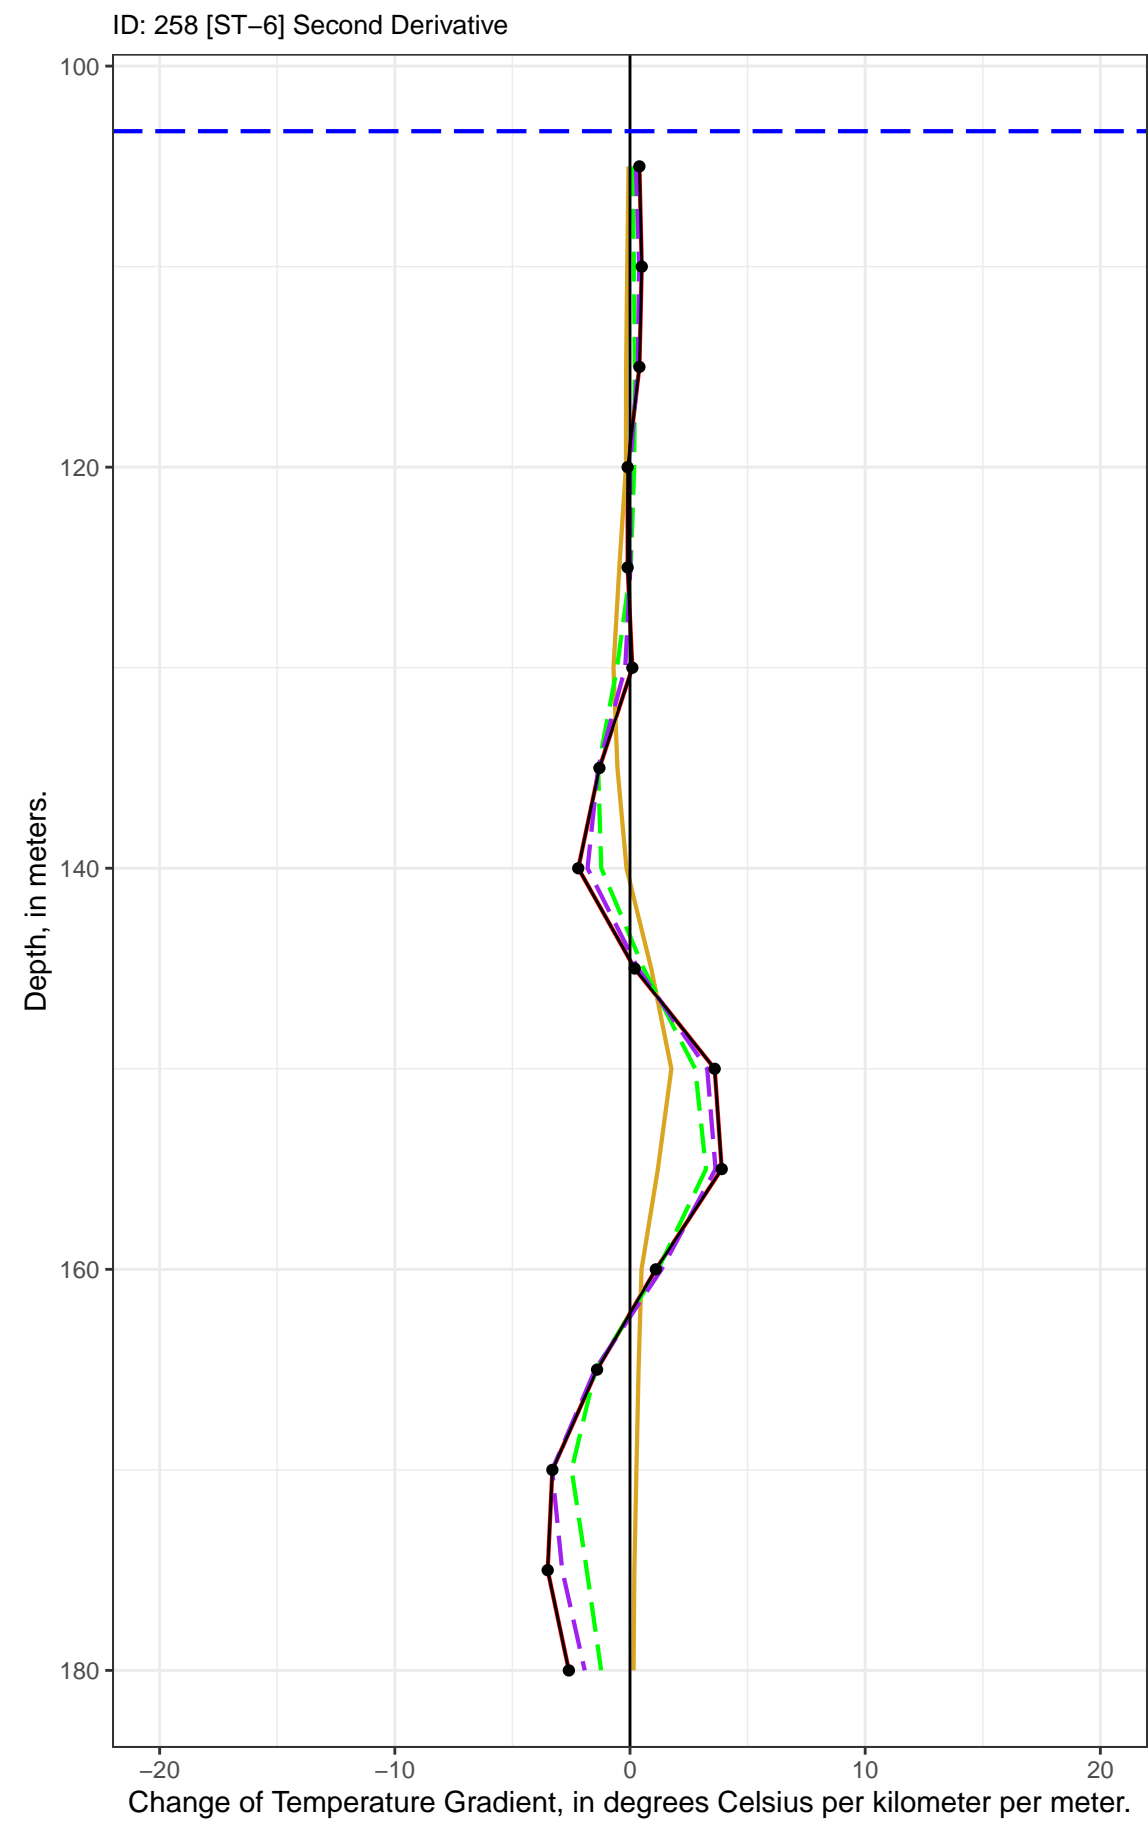

• Data — LOESS (AICC) — LOESS (constant) — LOESS (GCV) — Spline

• Data — LOESS (AICC) — LOESS (constant) — LOESS (GCV) — Spline

• Data — LOESS (AICC) — LOESS (constant) — LOESS (GCV) — Spline

ID: 259 [ST-7] Smoothed Profile

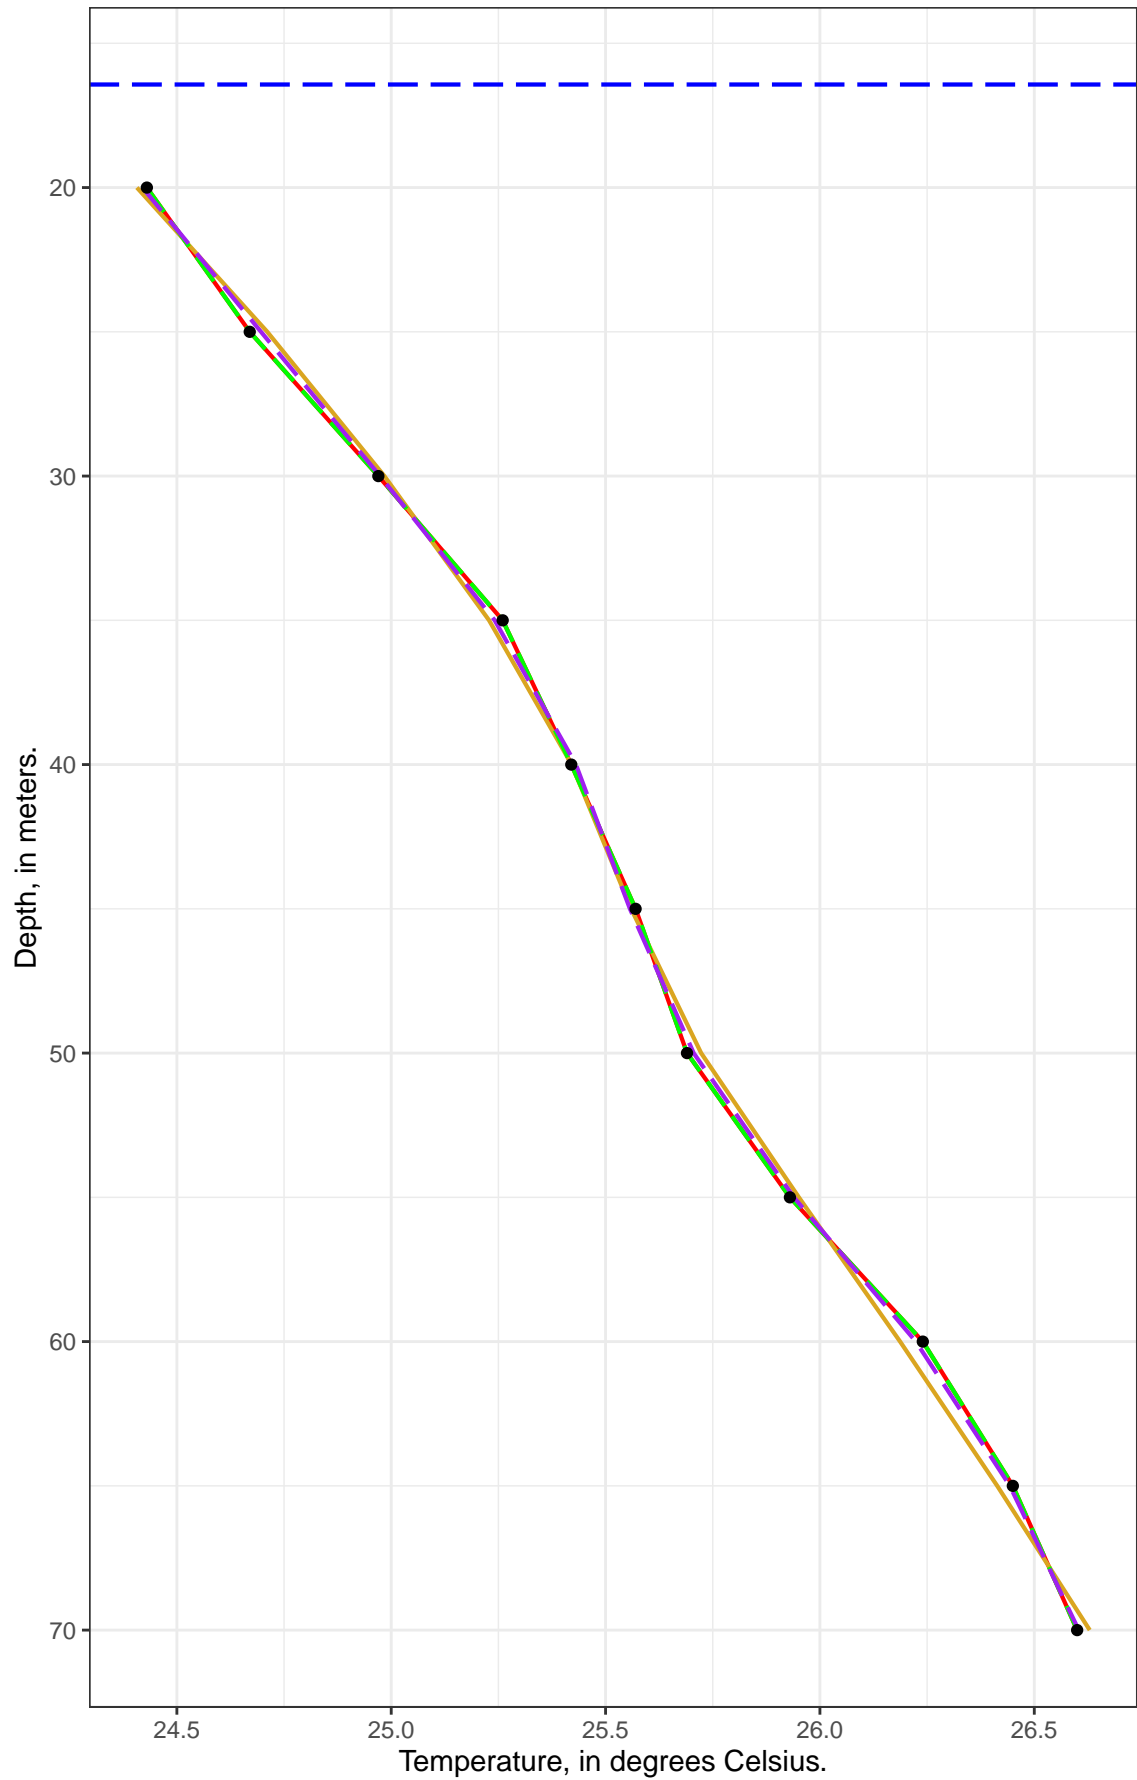

• Data • LOESS (AICC) • LOESS (constant) • LOESS (GCV) • Spline

ID: 259 [ST-7] First Derivative

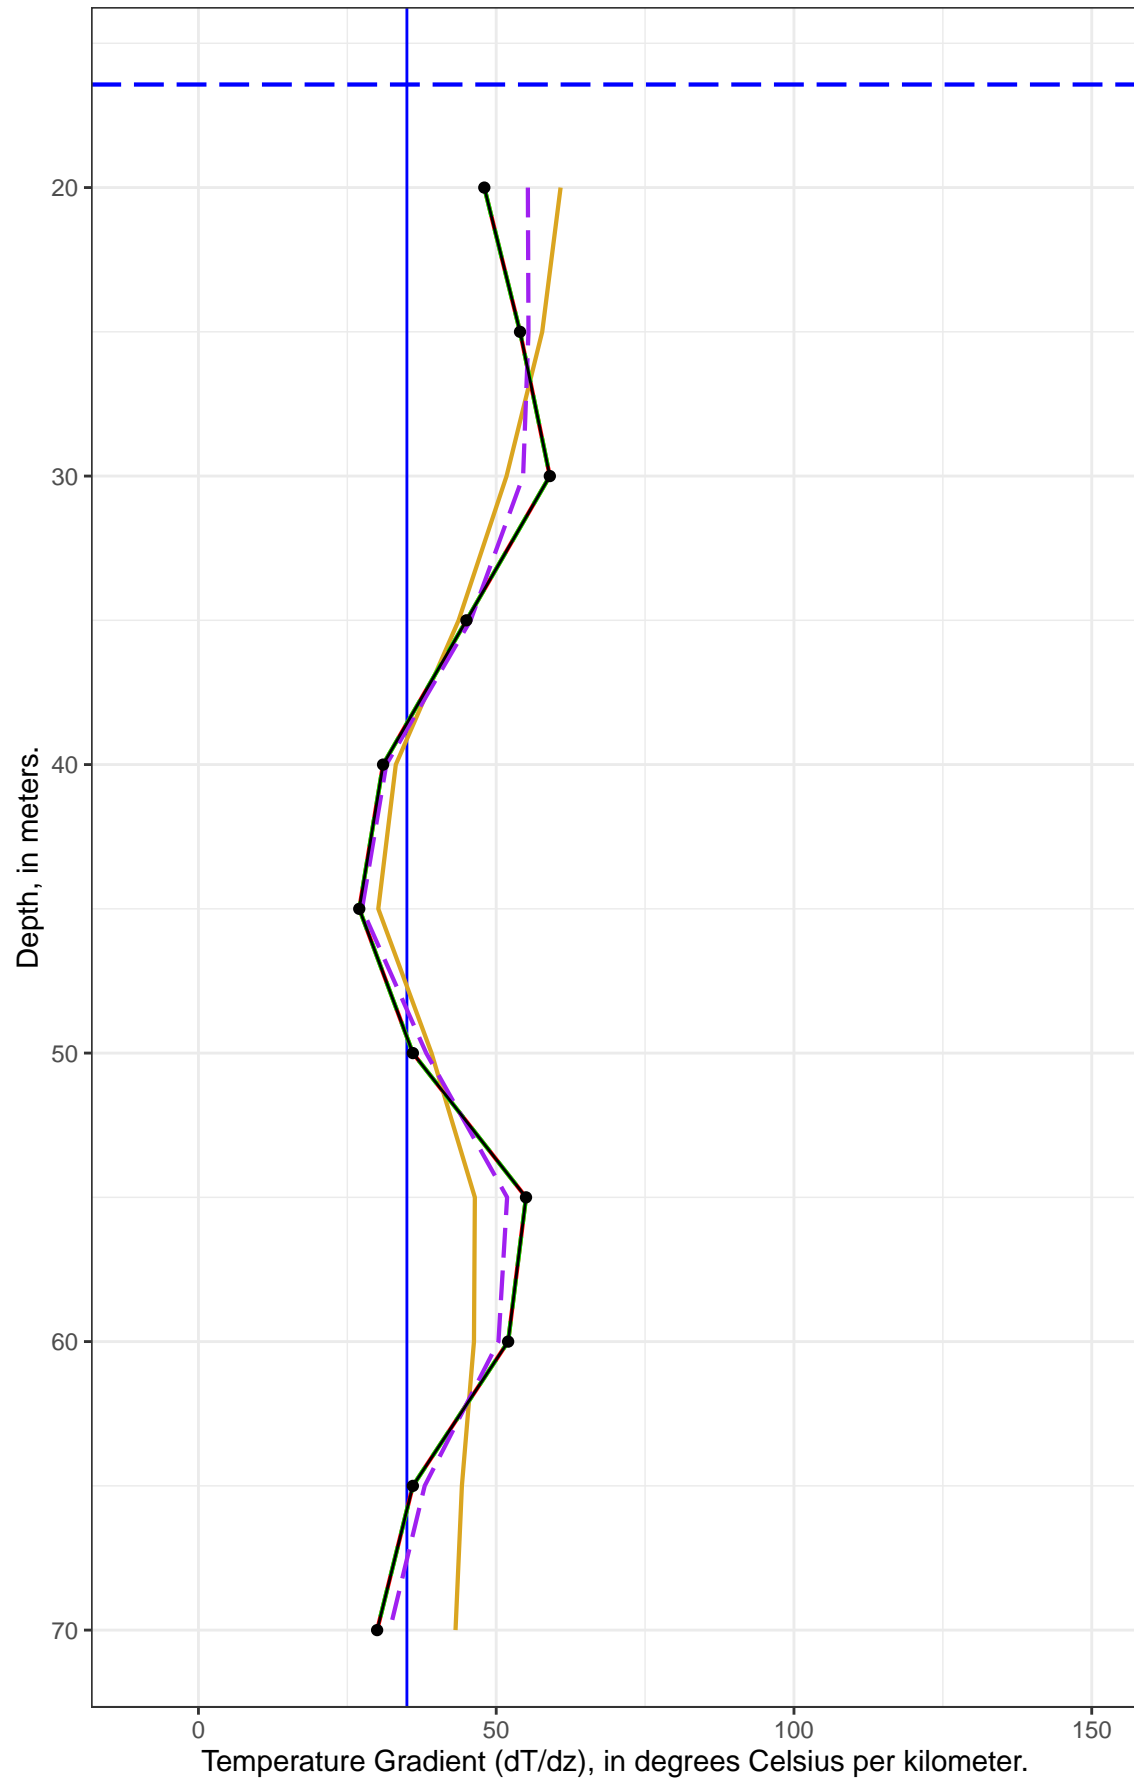

• Data • LOESS (AICC) • LOESS (constant) • LOESS (GCV) • Spline

ID: 259 [ST-7] Second Derivative

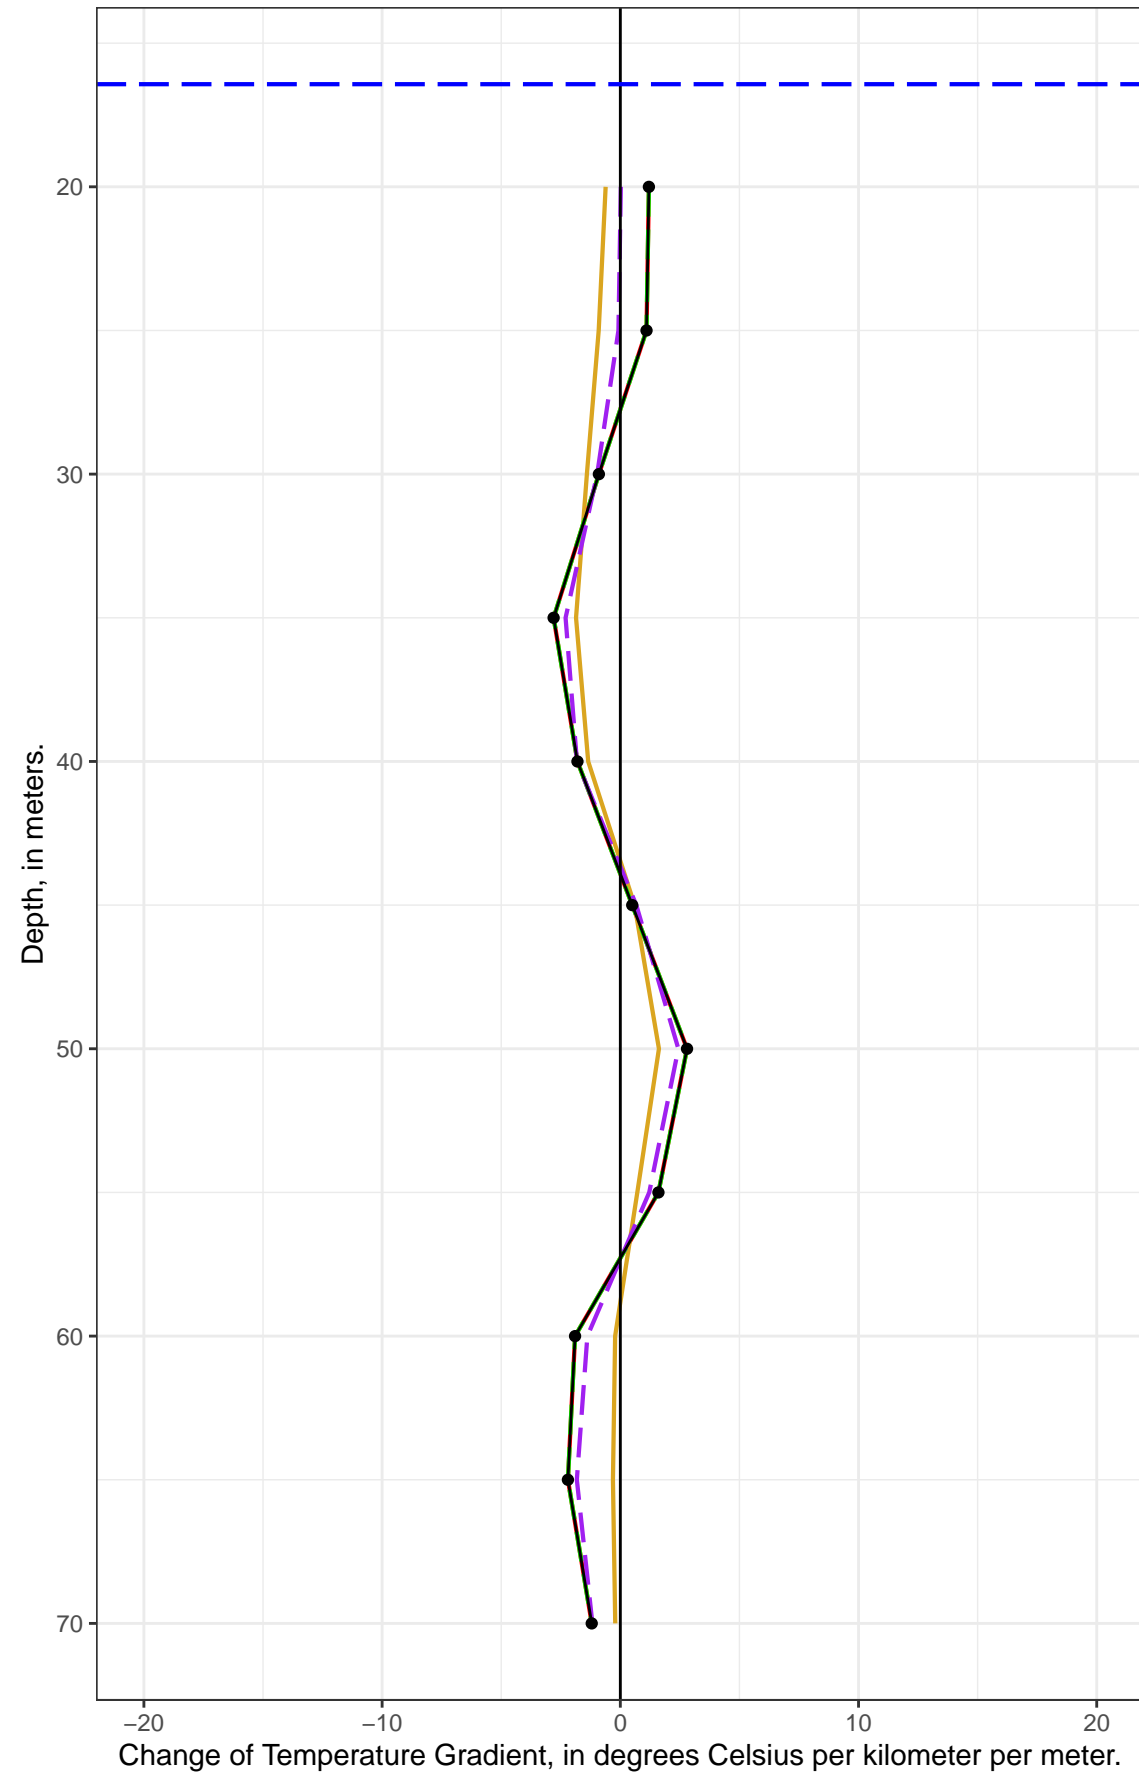

• Data • LOESS (AICC) • LOESS (constant) • LOESS (GCV) • Spline

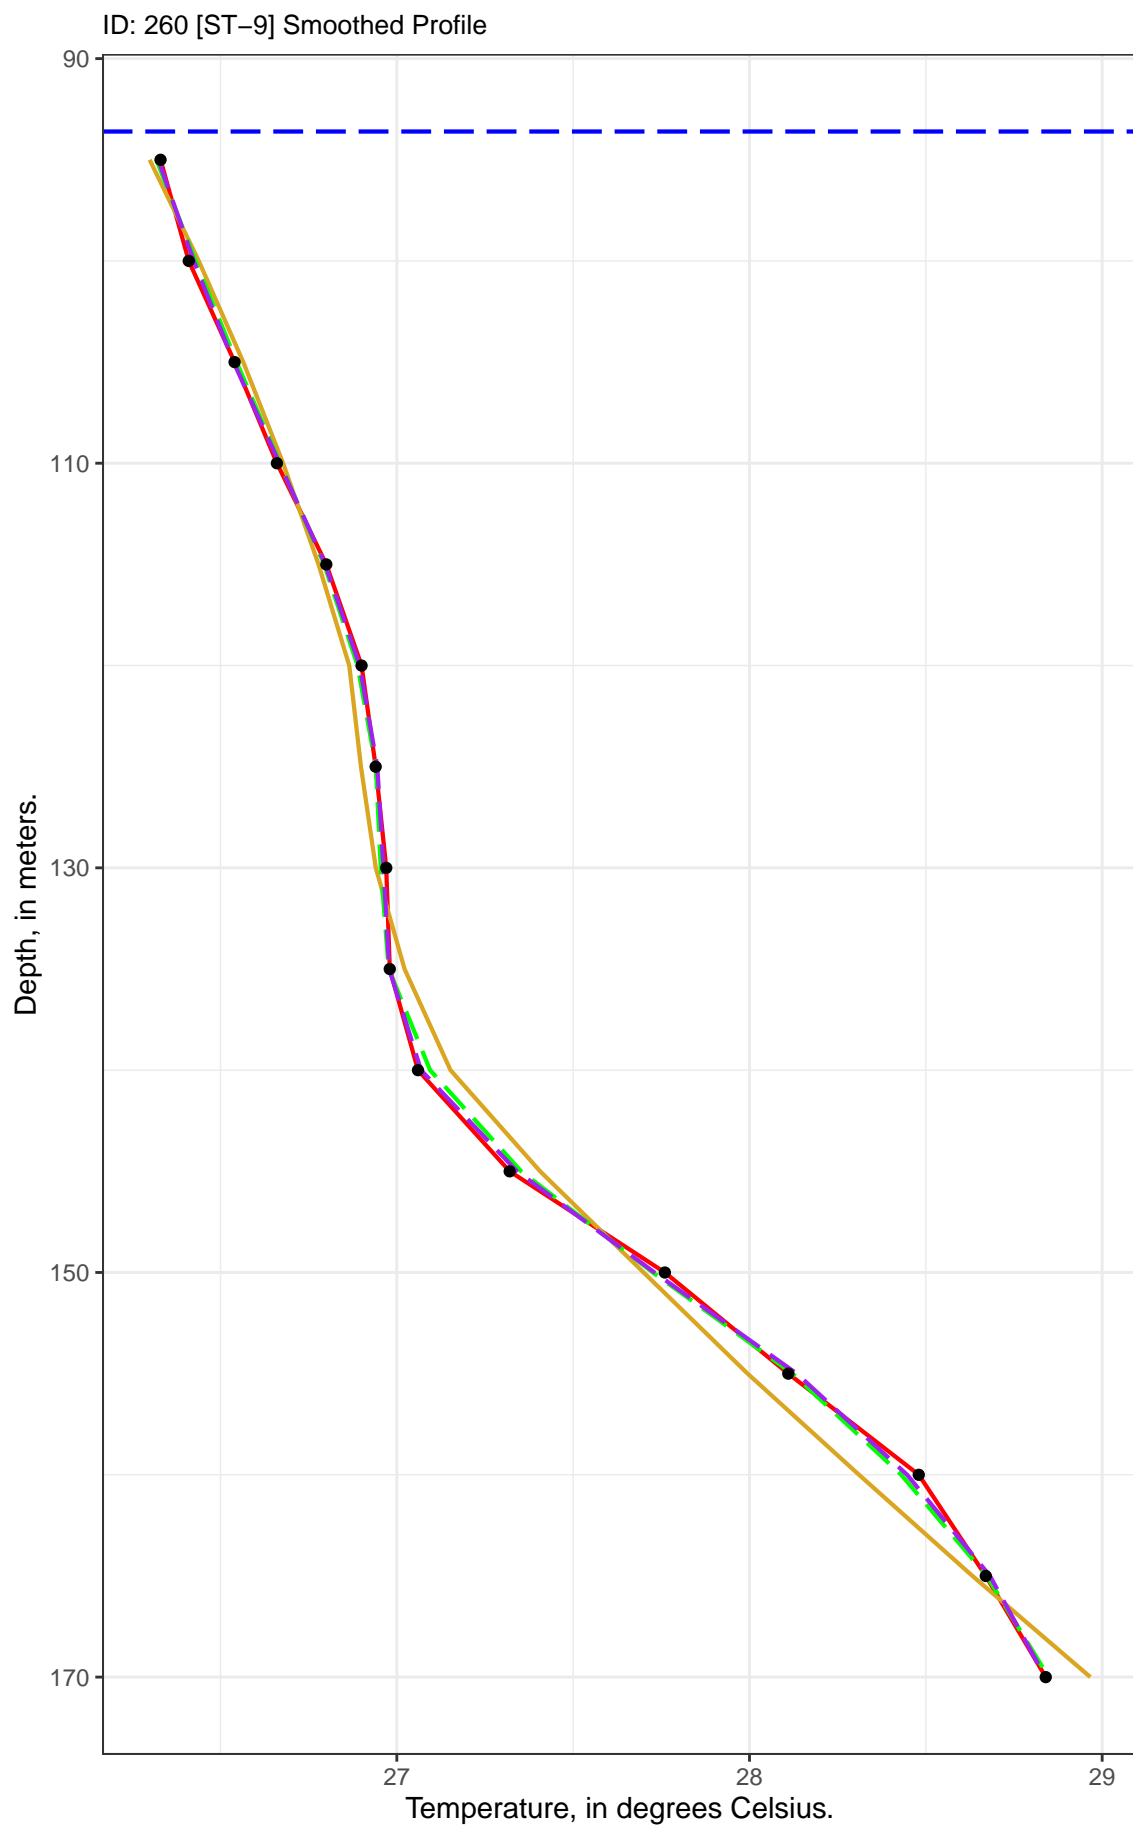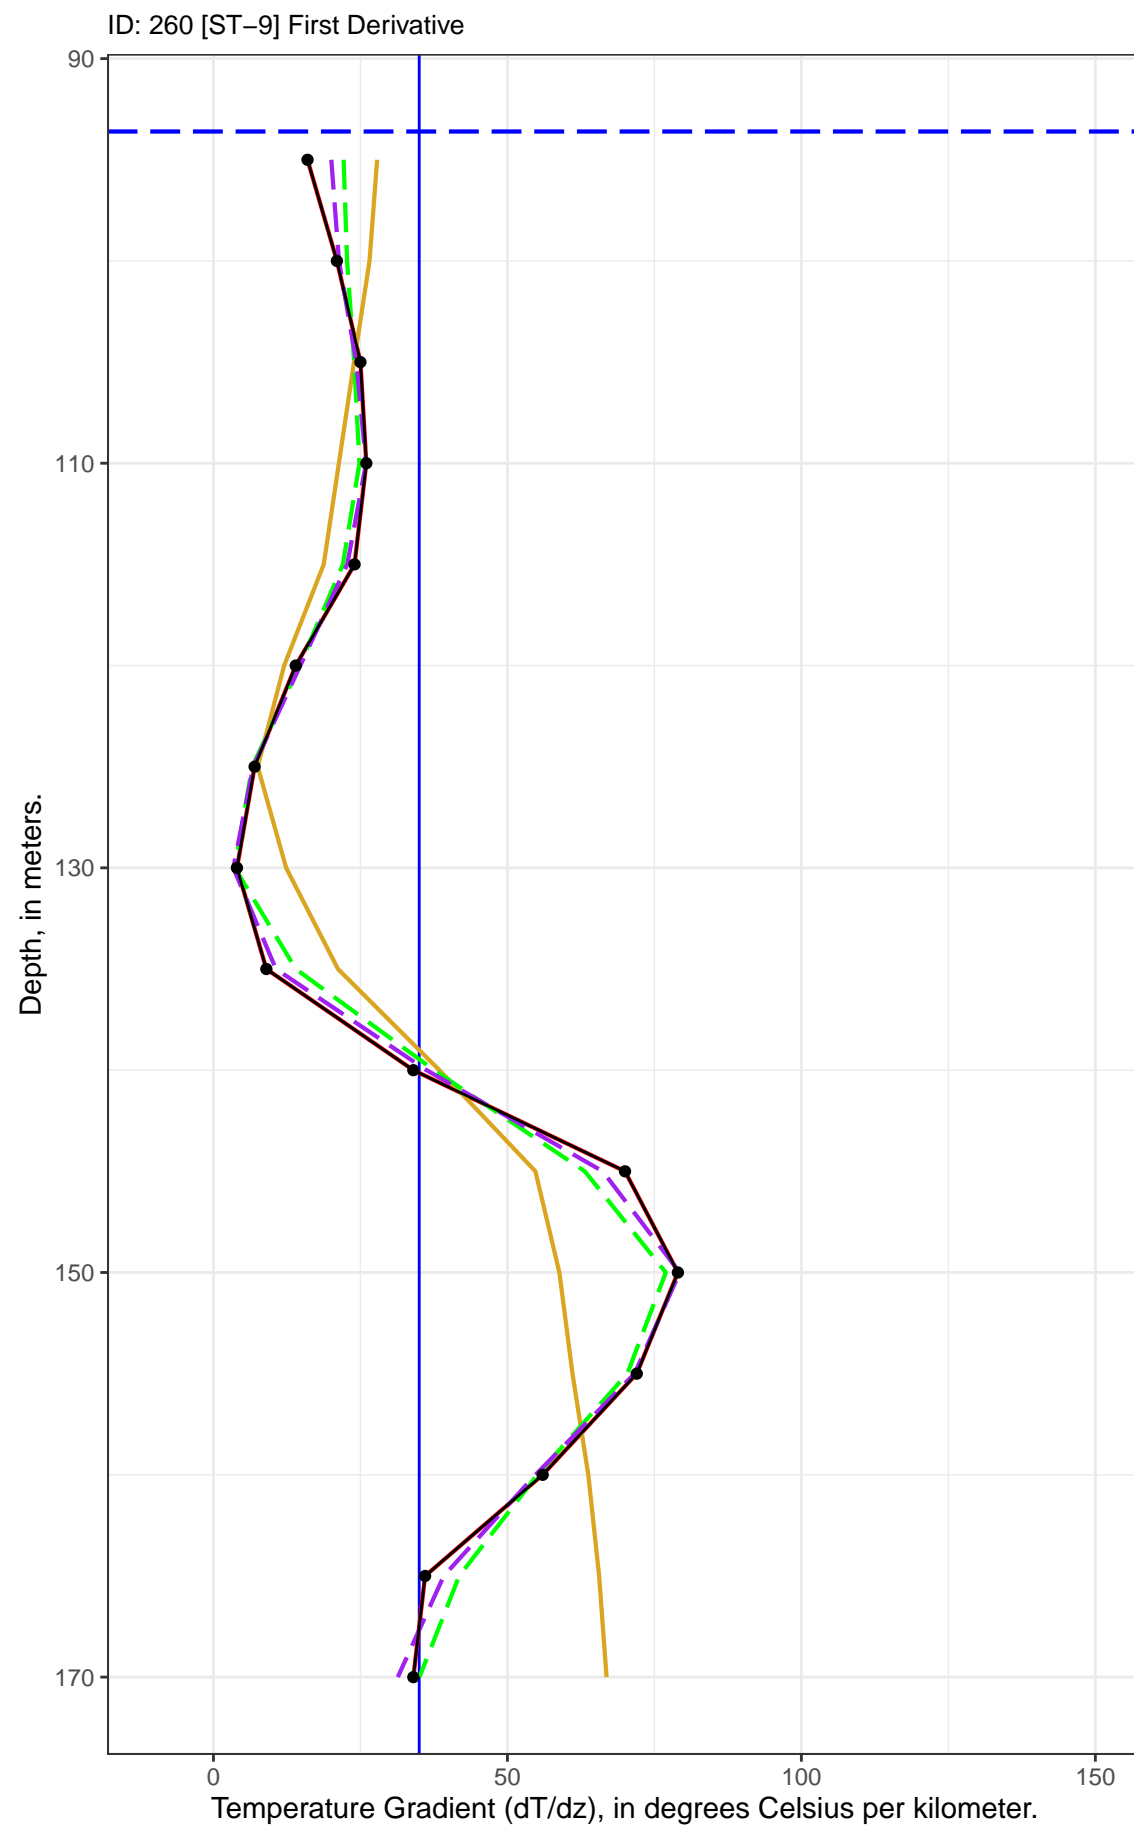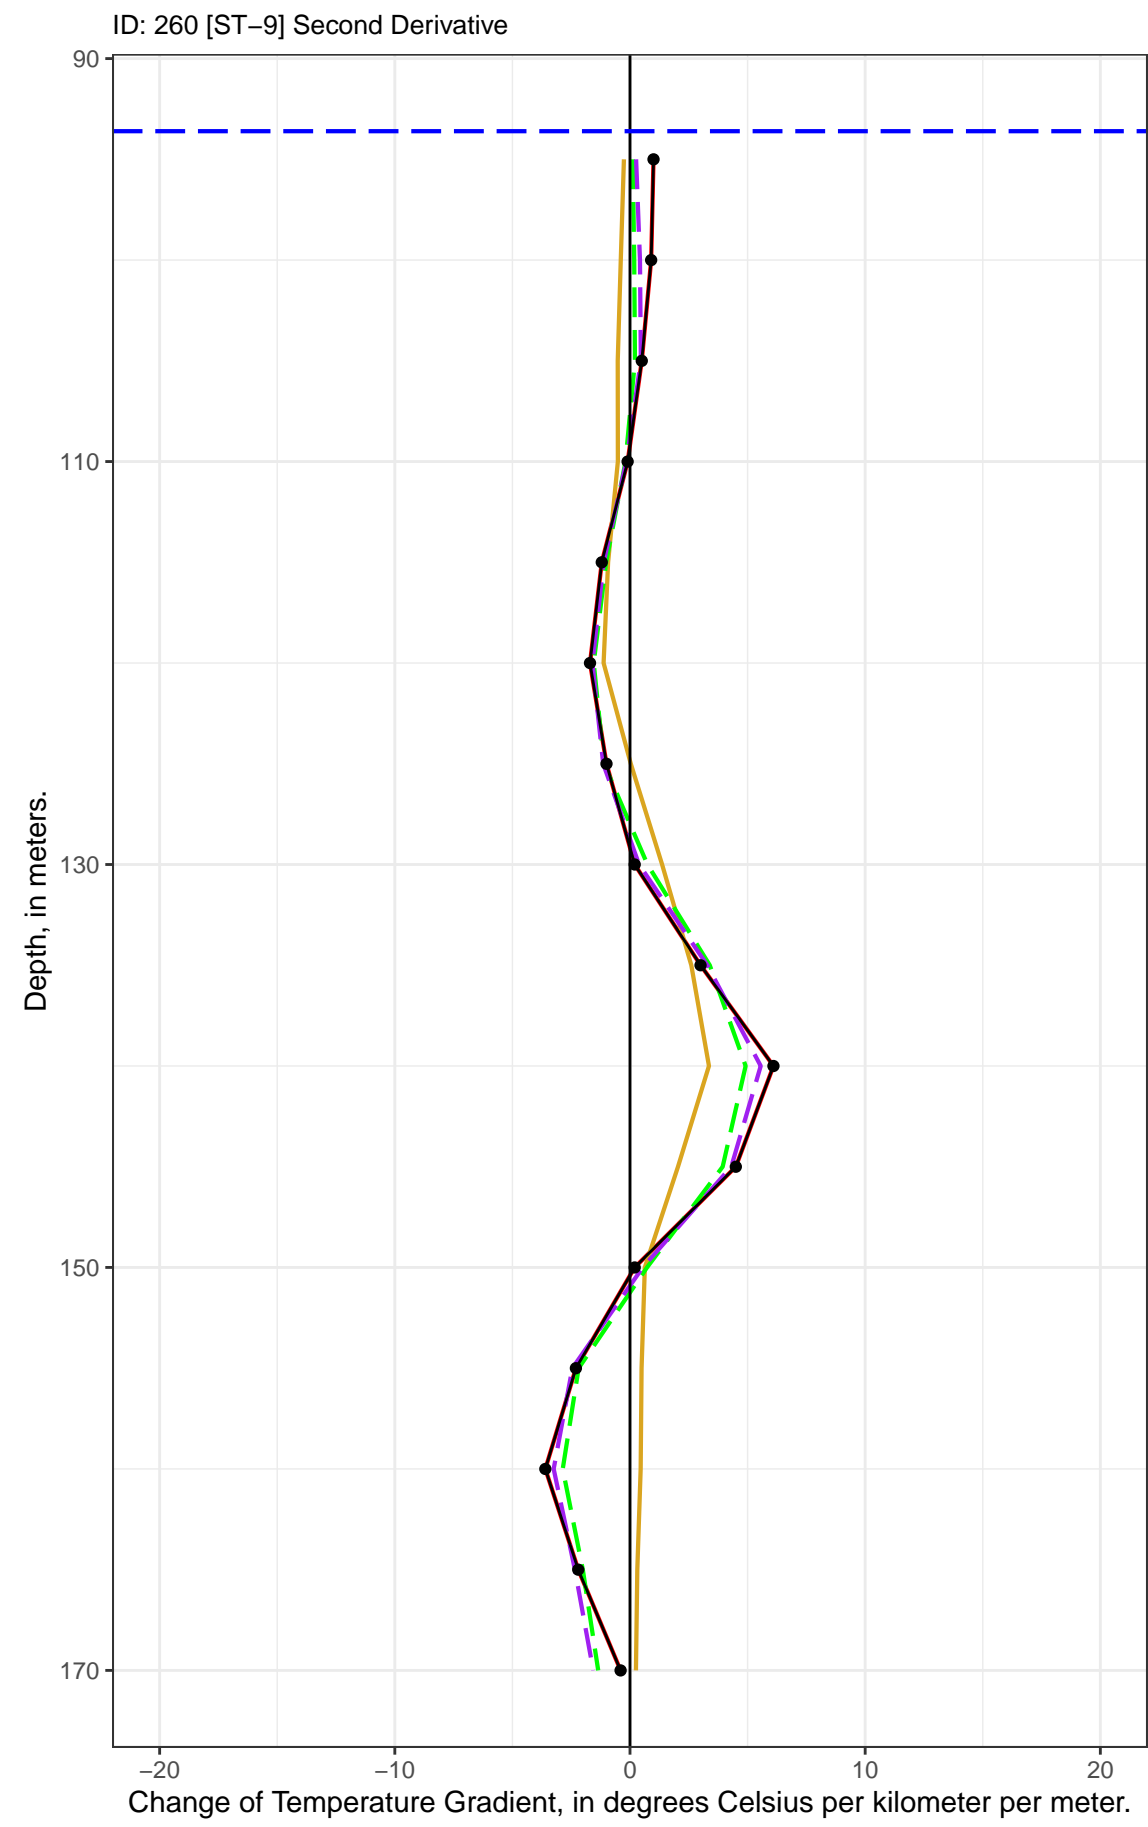

• Data — LOESS (AICC) — LOESS (constant) — LOESS (GCV) — Spline

• Data — LOESS (AICC) — LOESS (constant) — LOESS (GCV) — Spline

• Data — LOESS (AICC) — LOESS (constant) — LOESS (GCV) — Spline

ID: 349 [TG-NMSU-1] Smoothed Profile

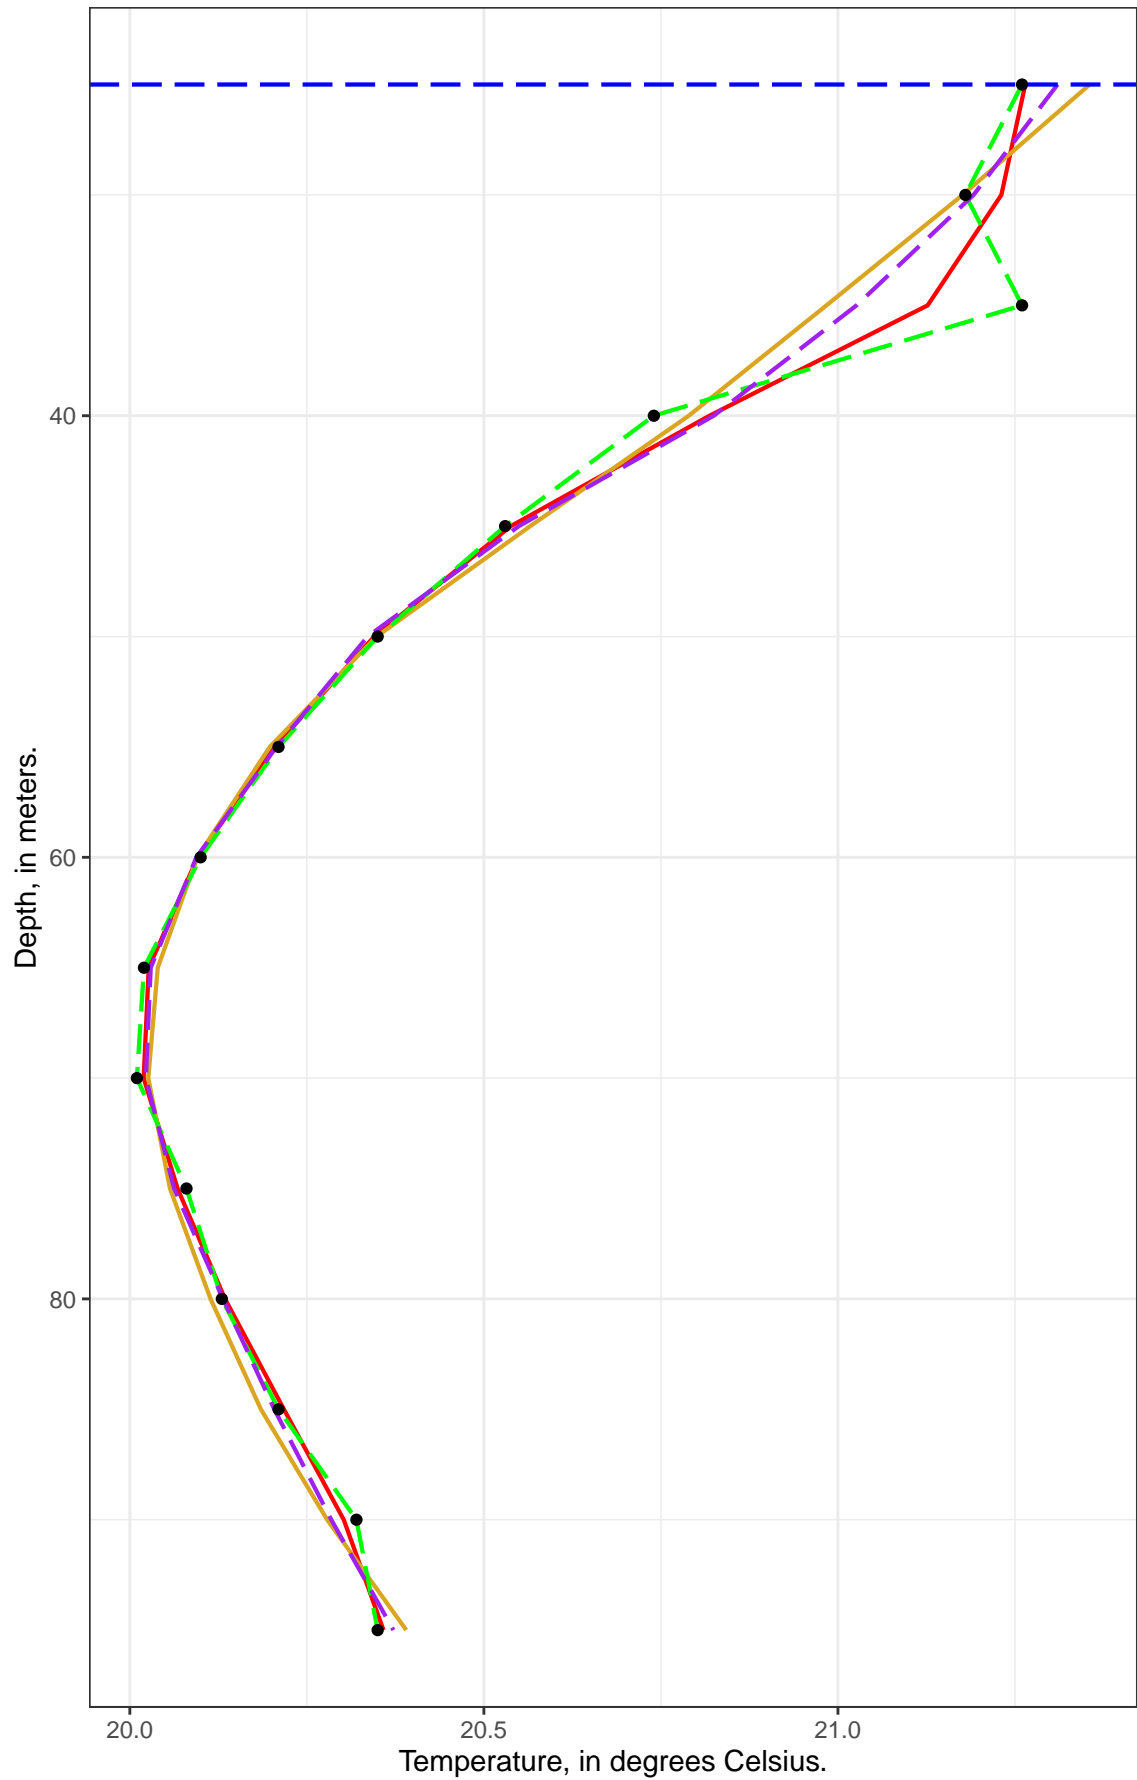

• Data • LOESS (AICC) • LOESS (constant) • LOESS (GCV) • Spline

ID: 349 [TG-NMSU-1] First Derivative

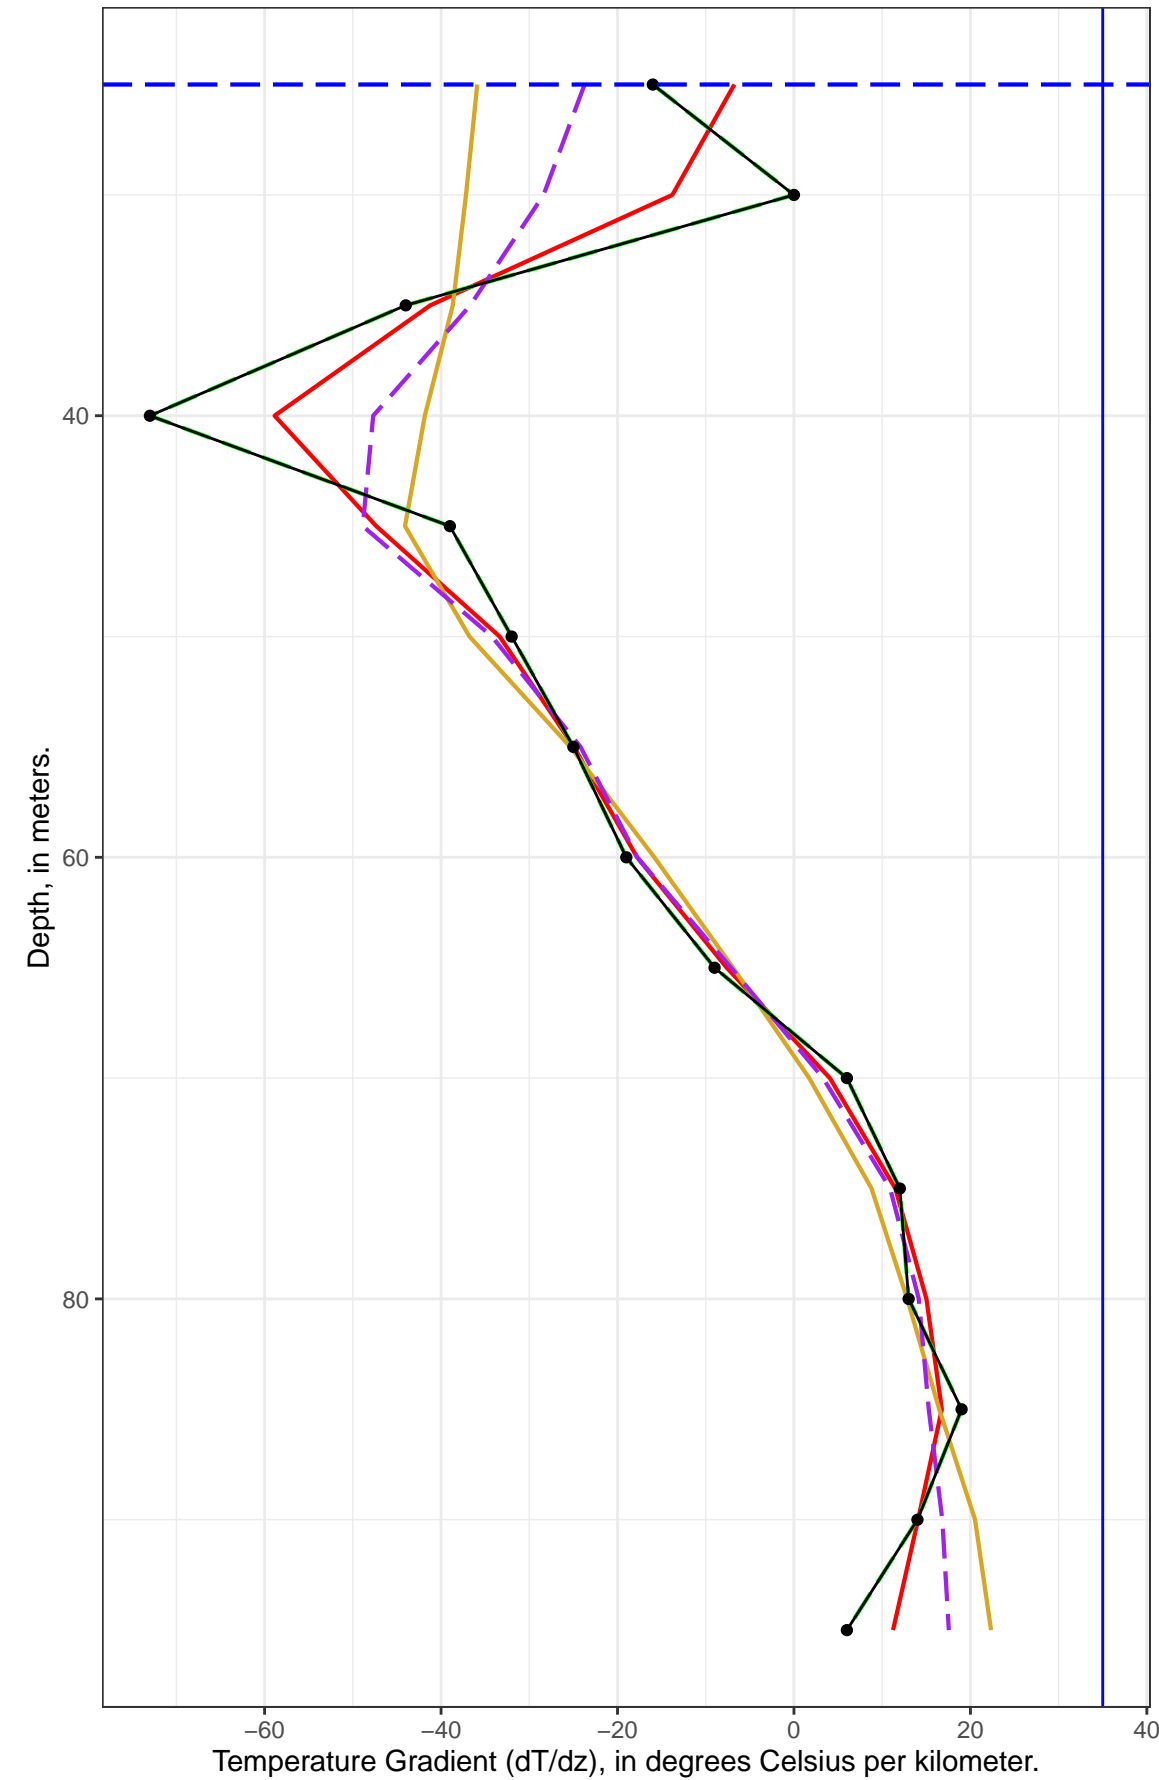

• Data • LOESS (AICC) • LOESS (constant) • LOESS (GCV) • Spline

ID: 349 [TG-NMSU-1] Second Derivative

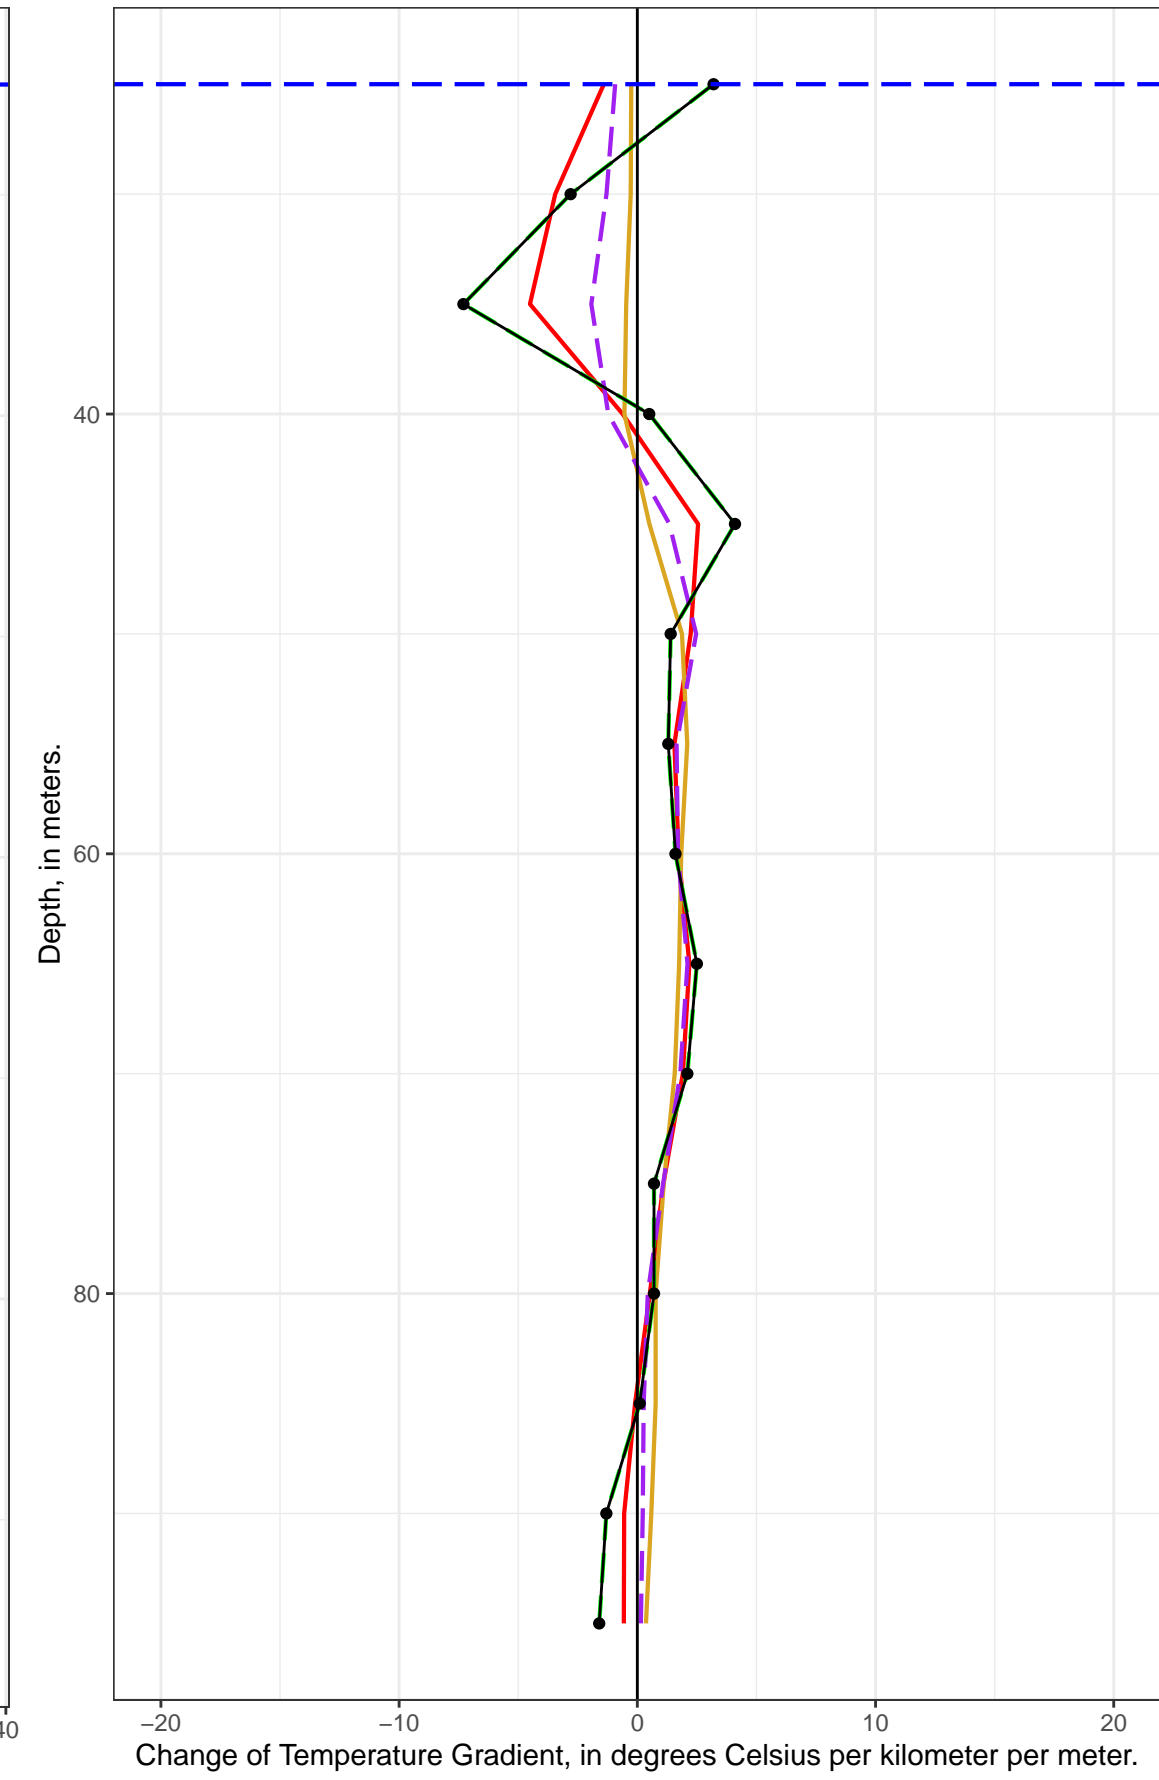

• Data • LOESS (AICC) • LOESS (constant) • LOESS (GCV) • Spline

ID: 350 [TG-NMSU-10\_PG-2] Smoothed Profile

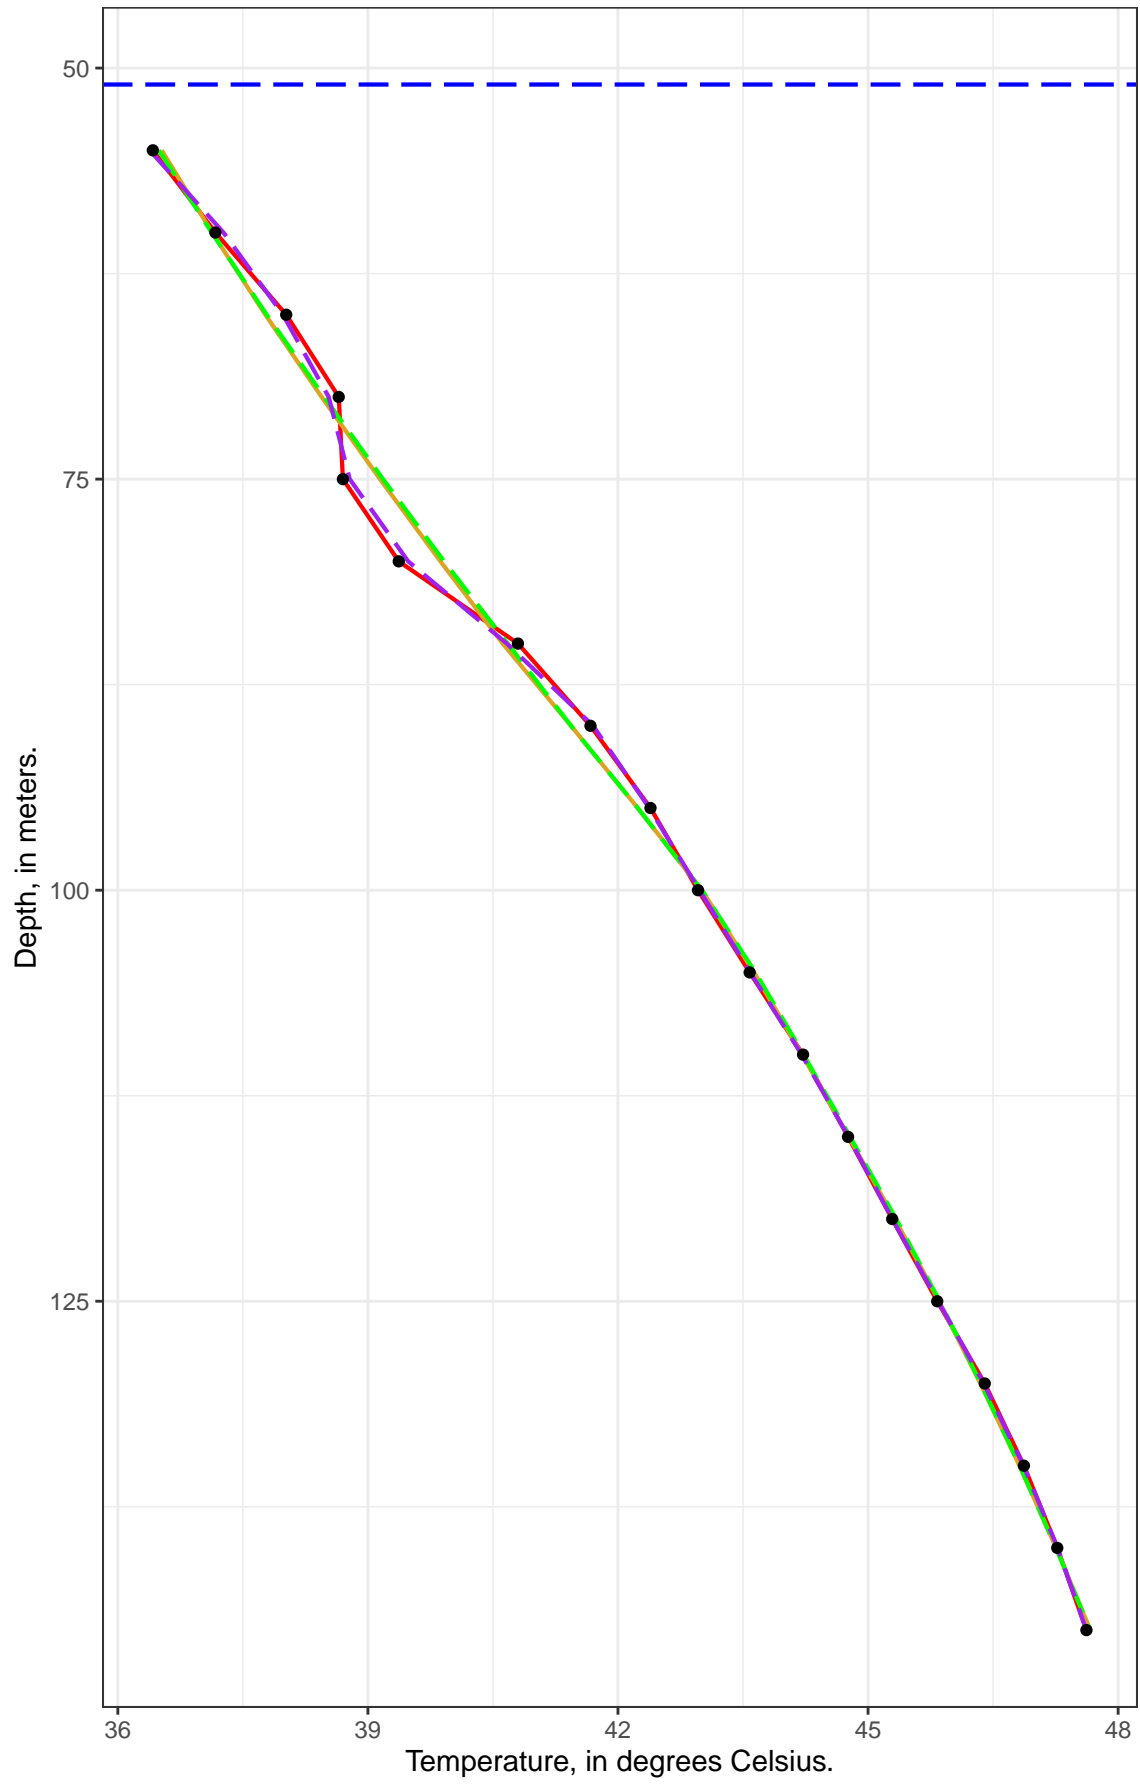

ID: 350 [TG-NMSU-10\_PG-2] First Derivative

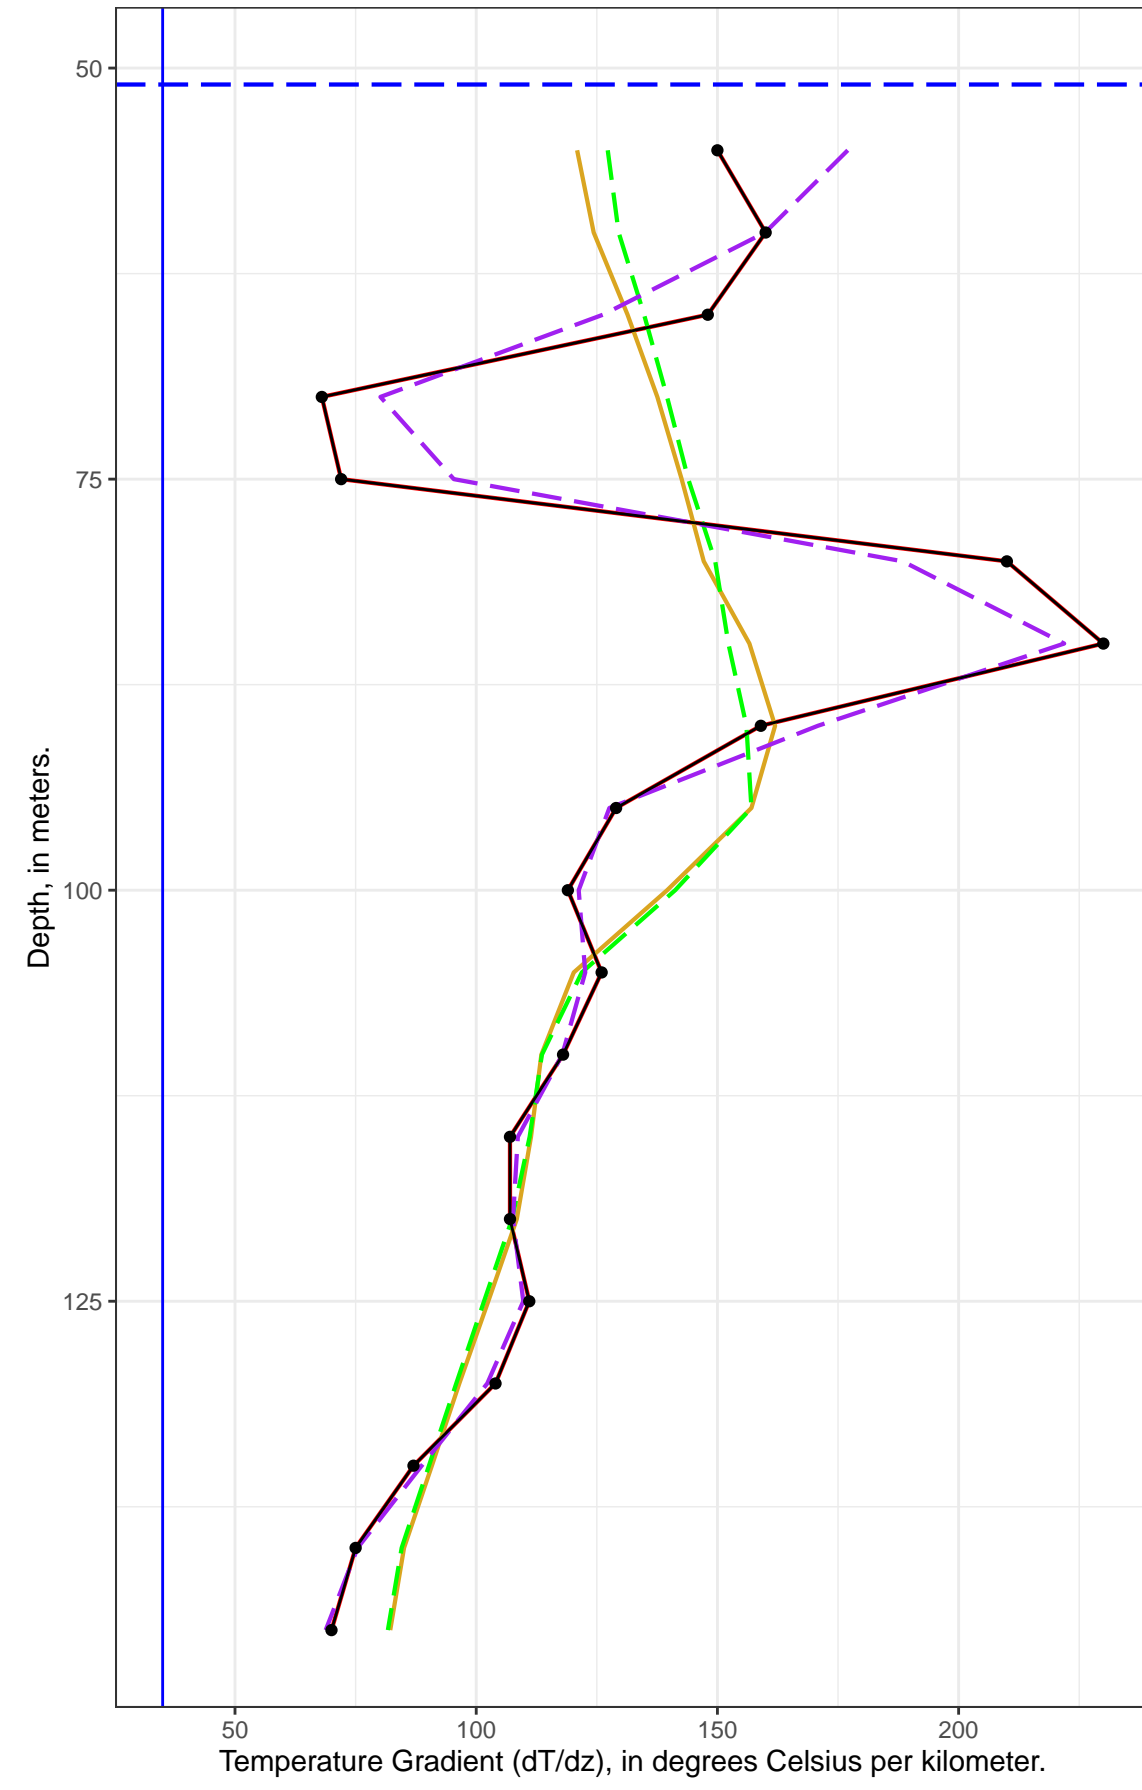

ID: 350 [TG-NMSU-10\_PG-2] Second Derivative

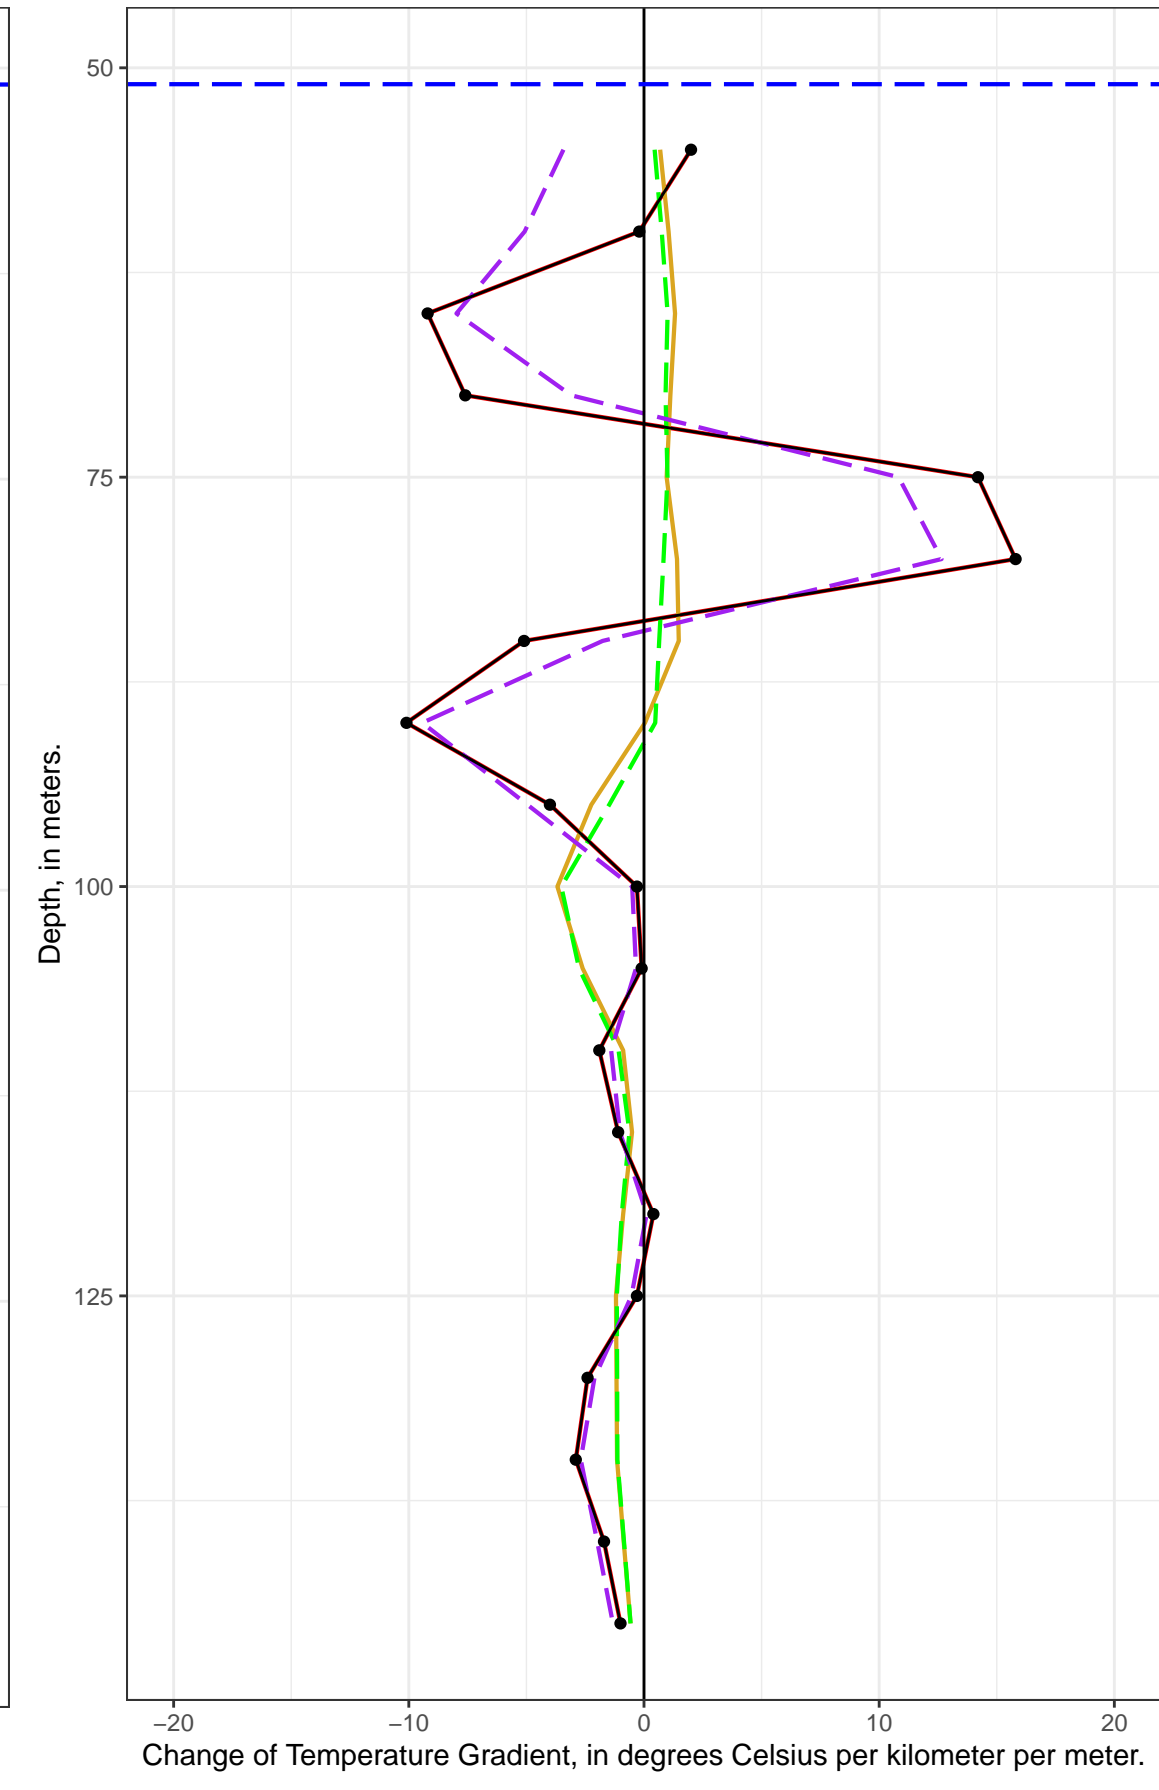

• Data    — LOESS (AICC)    — LOESS (constant)    — LOESS (GCV)    — Spline

• Data    — LOESS (AICC)    — LOESS (constant)    — LOESS (GCV)    — Spline

• Data    — LOESS (AICC)    — LOESS (constant)    — LOESS (GCV)    — Spline

ID: 363 [TG-NMSU-3\_GOLF\_COURSE\_Well\_GD-1] Smoothed Profile

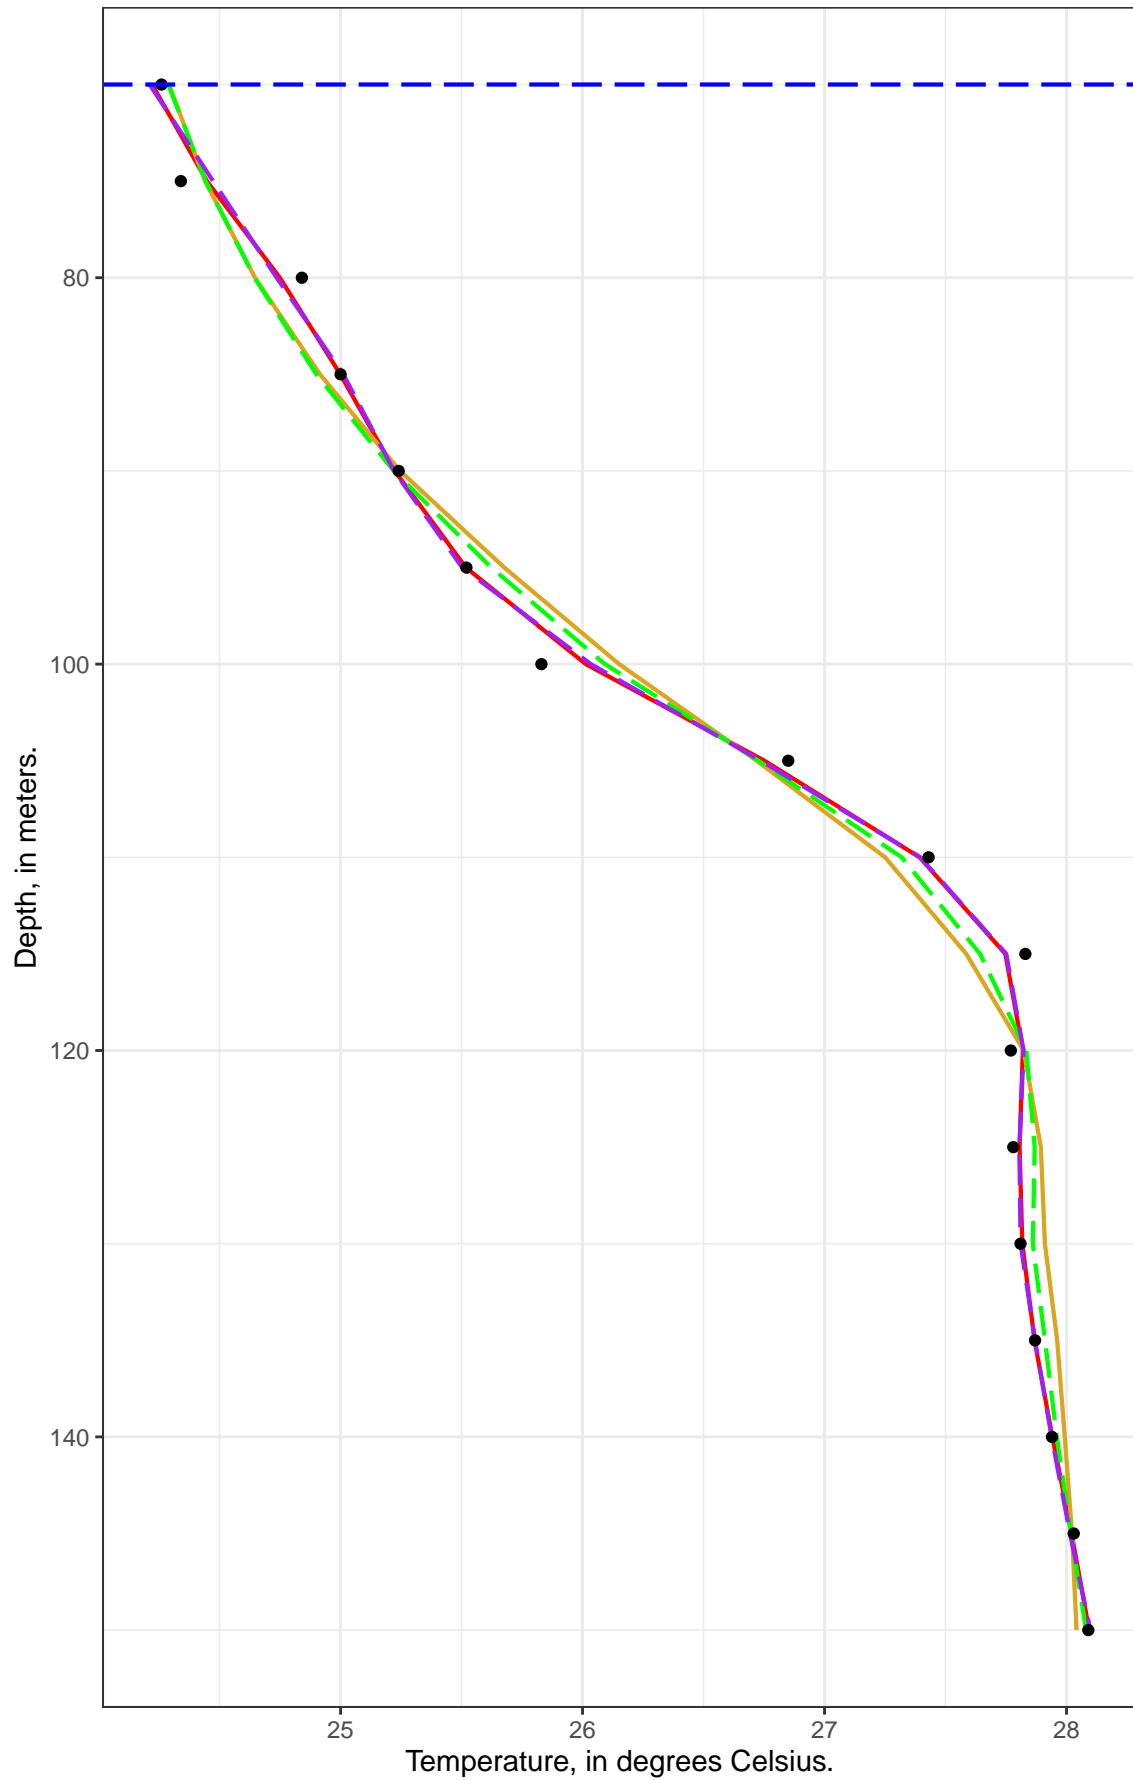

ID: 363 [TG-NMSU-3\_GOLF\_COURSE\_Well\_GD-1] First Derivative

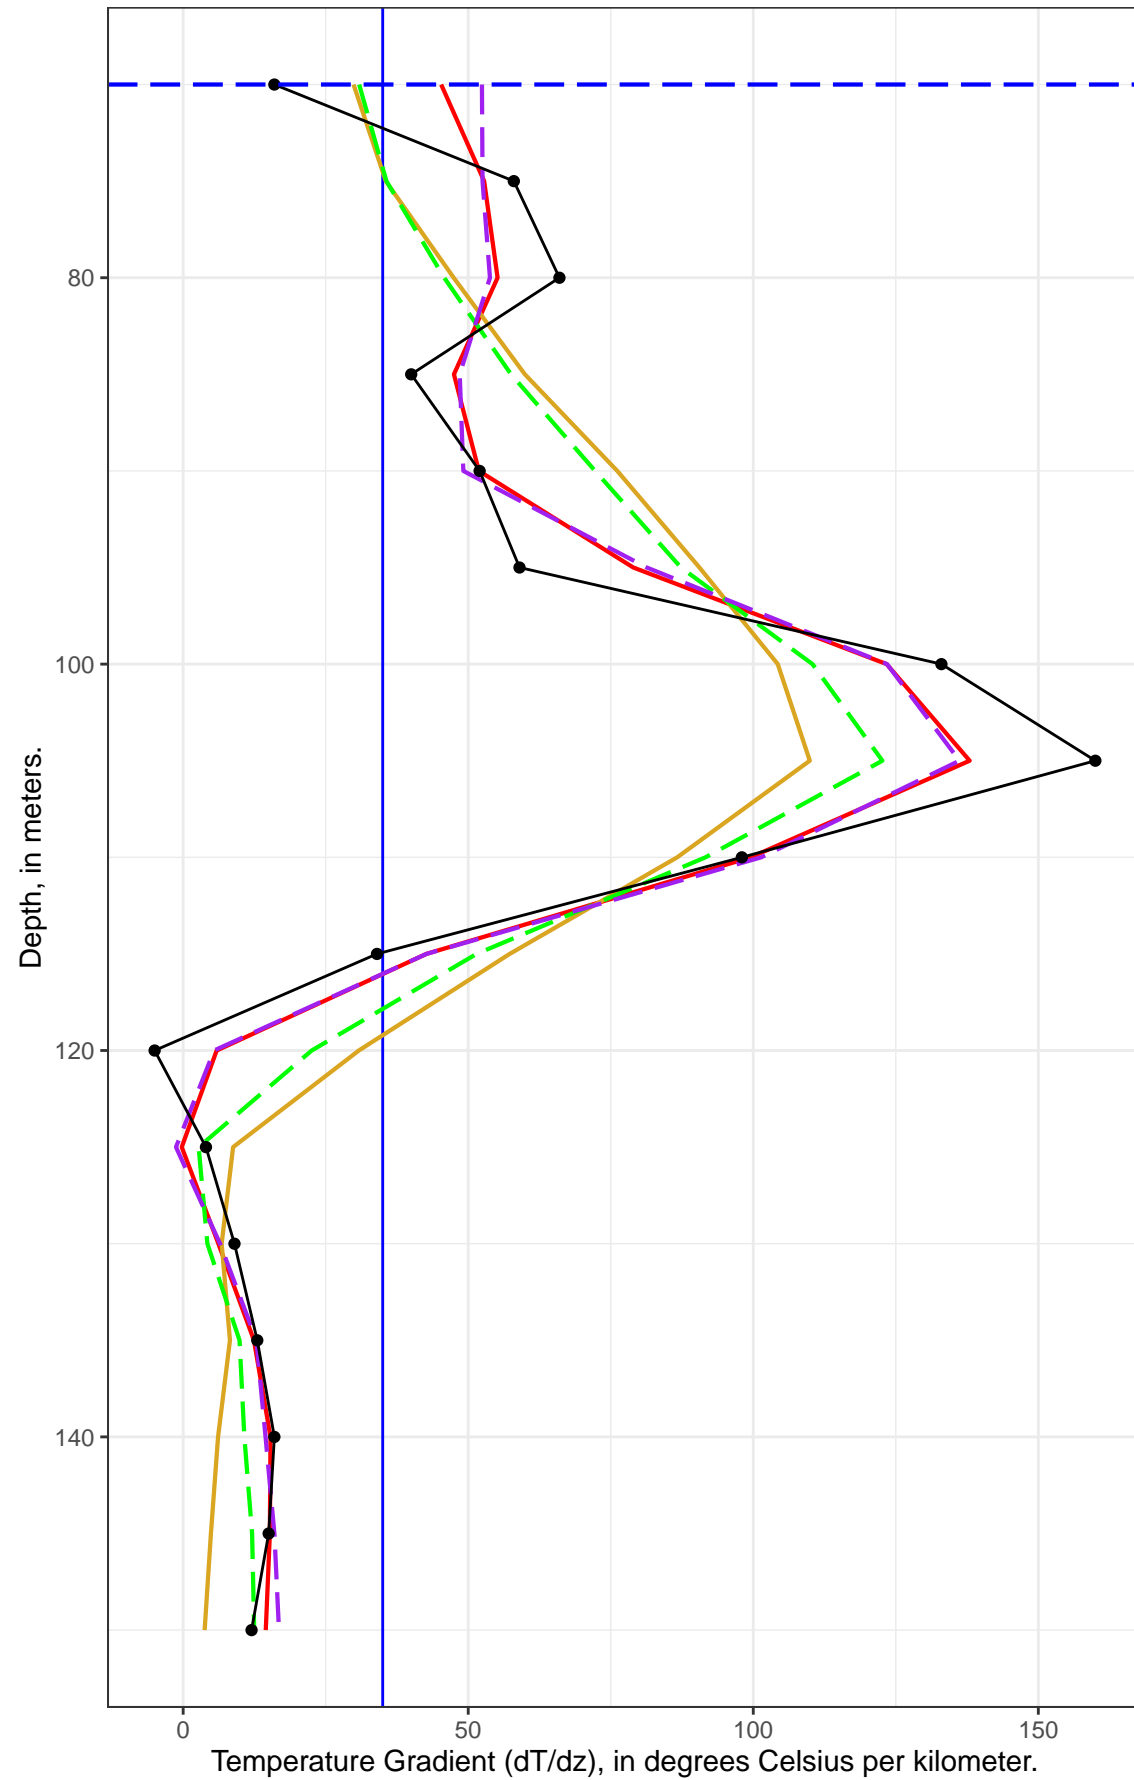

ID: 363 [TG-NMSU-3\_GOLF\_COURSE\_Well\_GD-1] Second Derivative

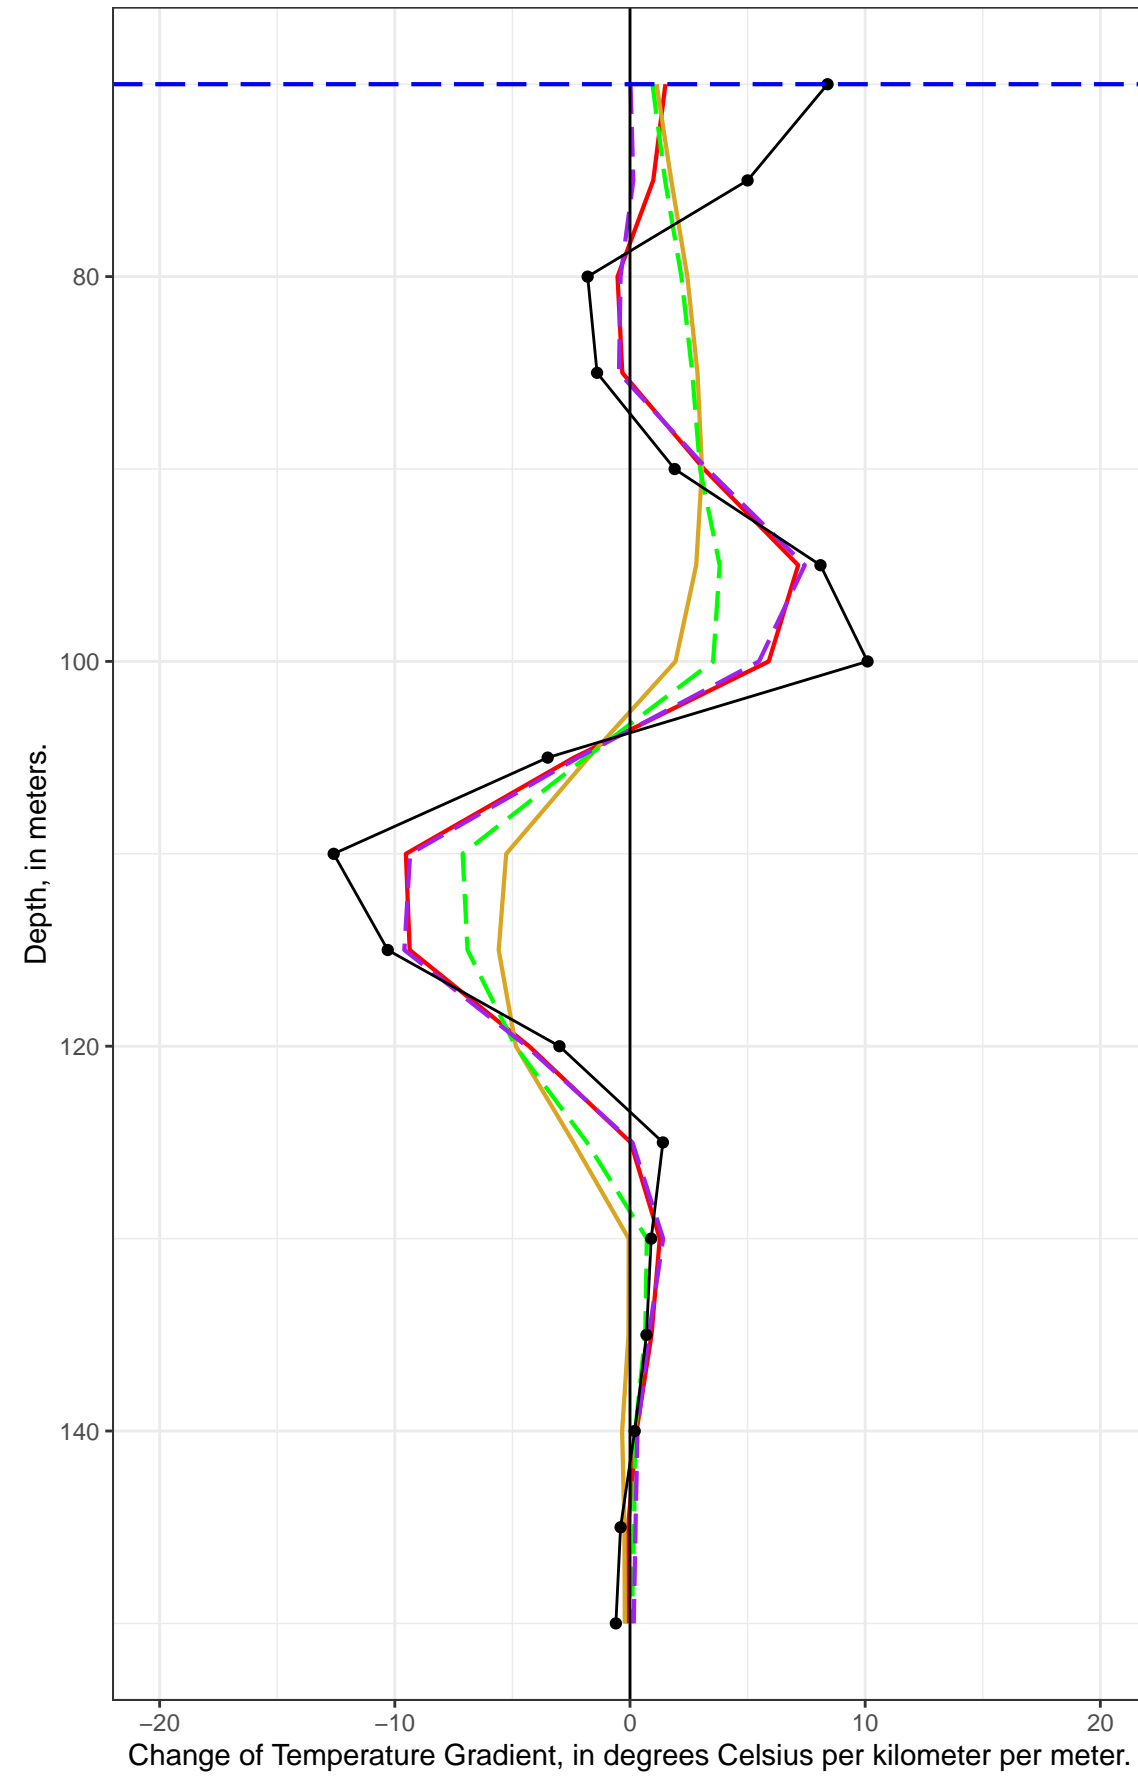

• Data — LOESS (AICC) — LOESS (constant) — LOESS (GCV) — Spline

• Data — LOESS (AICC) — LOESS (constant) — LOESS (GCV) — Spline

• Data — LOESS (AICC) — LOESS (constant) — LOESS (GCV) — Spline

ID: 371 [WHIT-6\_Dona\_Ana\_County] Smoothed Profile

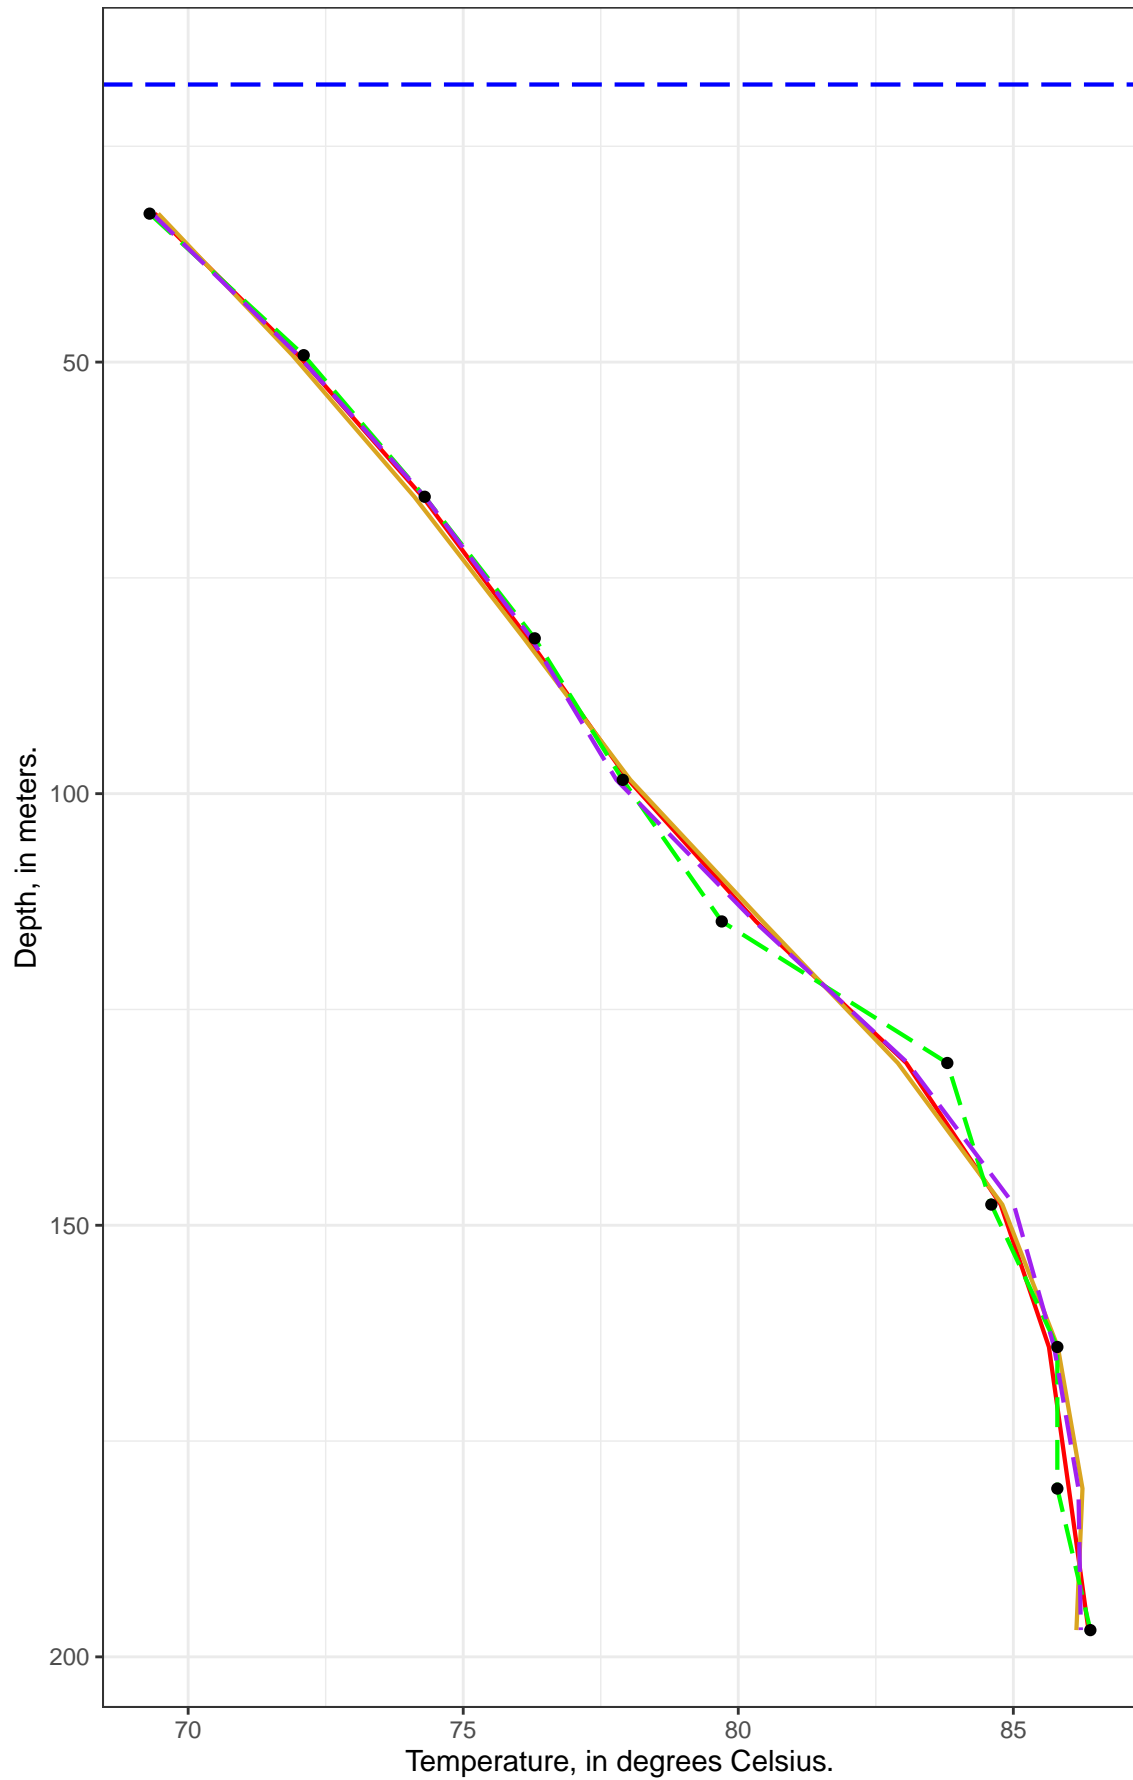

ID: 371 [WHIT-6\_Dona\_Ana\_County] First Derivative

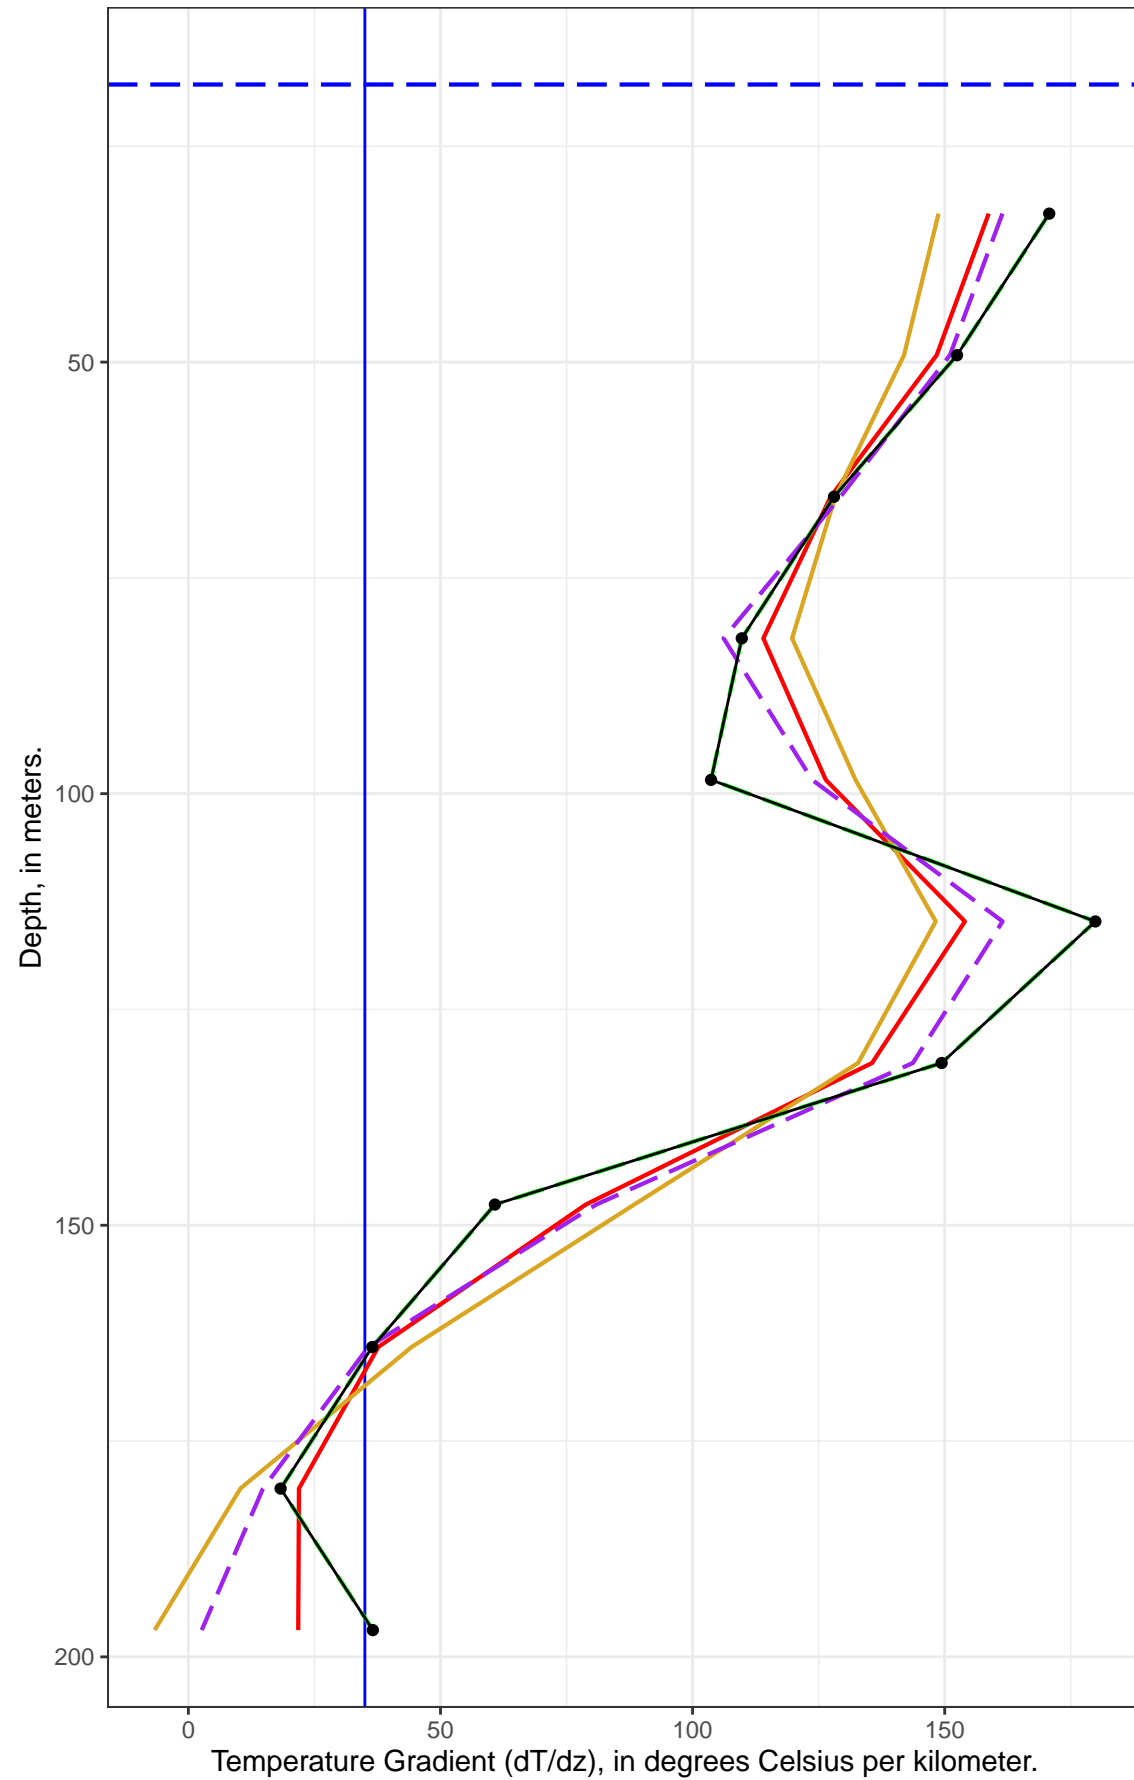

ID: 371 [WHIT-6\_Dona\_Ana\_County] Second Derivative

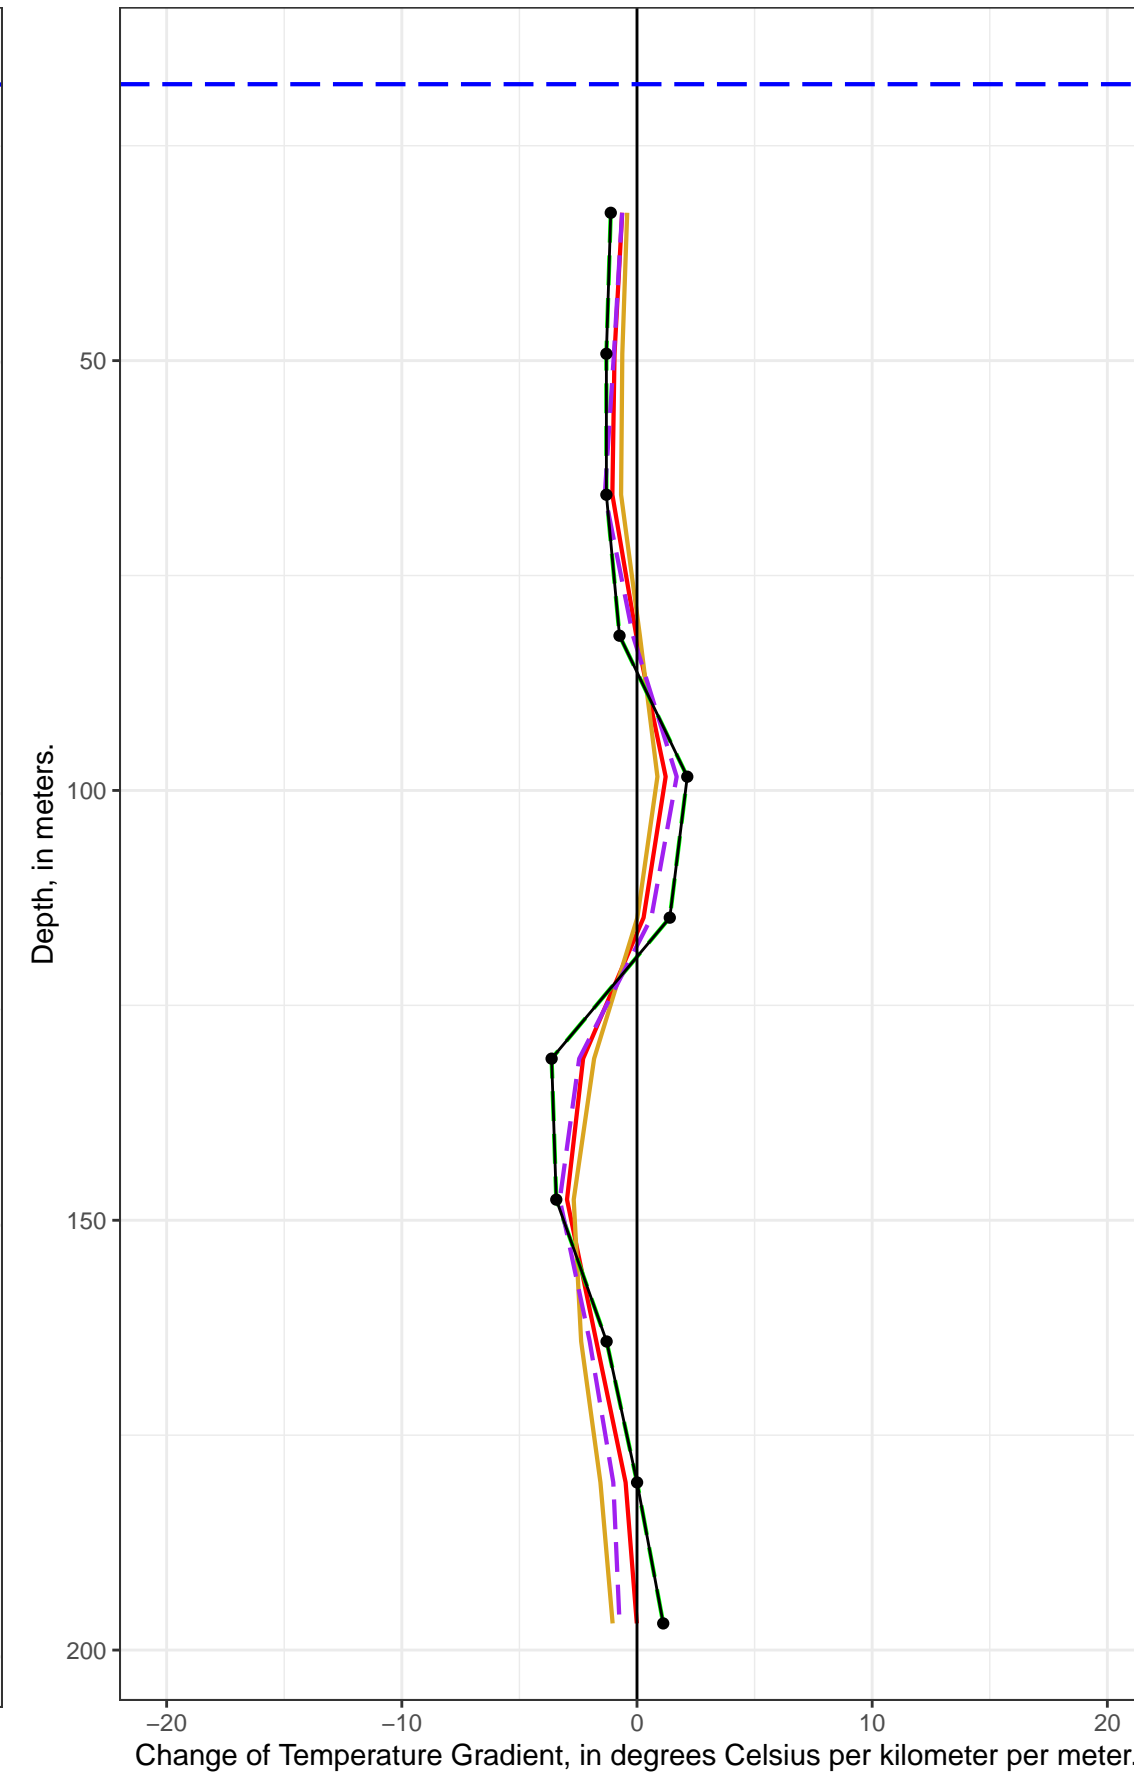

• Data — LOESS (AICC) — LOESS (constant) — LOESS (GCV) — Spline

• Data — LOESS (AICC) — LOESS (constant) — LOESS (GCV) — Spline

• Data — LOESS (AICC) — LOESS (constant) — LOESS (GCV) — Spline

ID: 372 [W\_Well\_East\_of\_Vado] Smoothed Profile

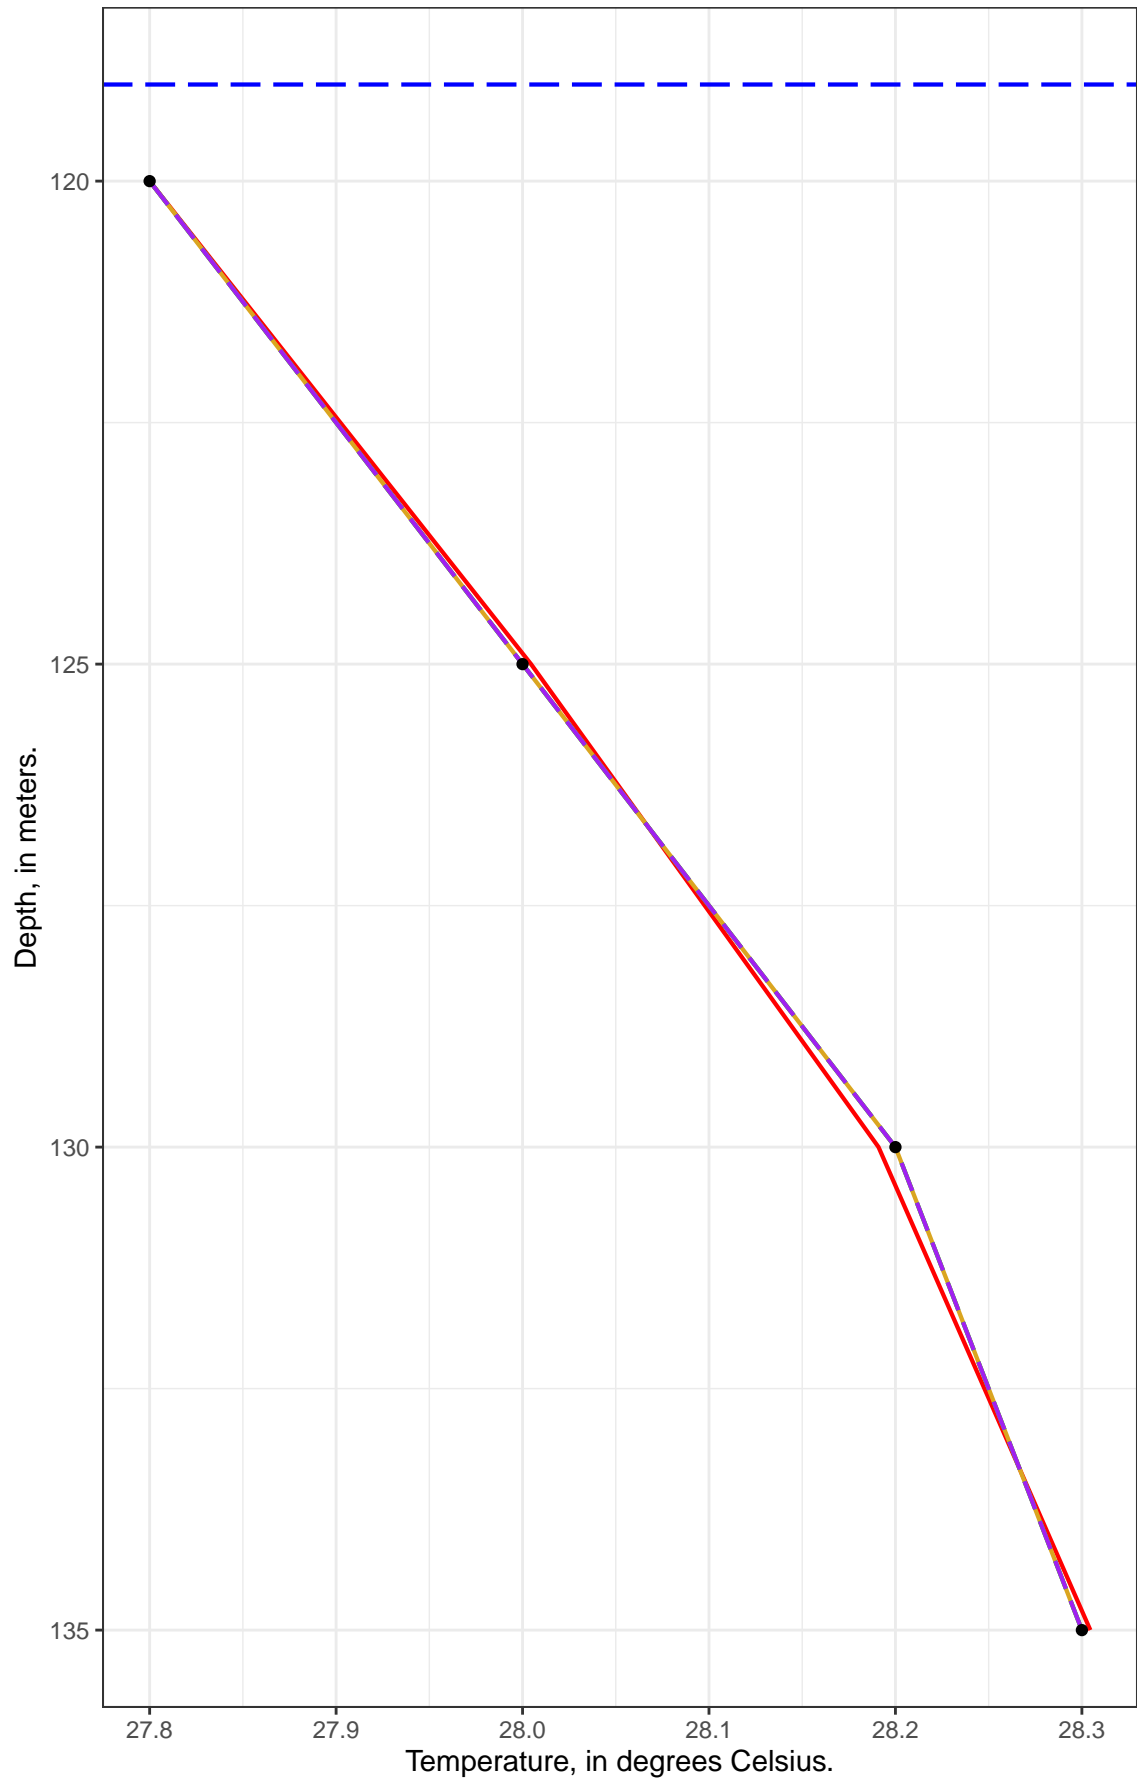

ID: 372 [W\_Well\_East\_of\_Vado] First Derivative

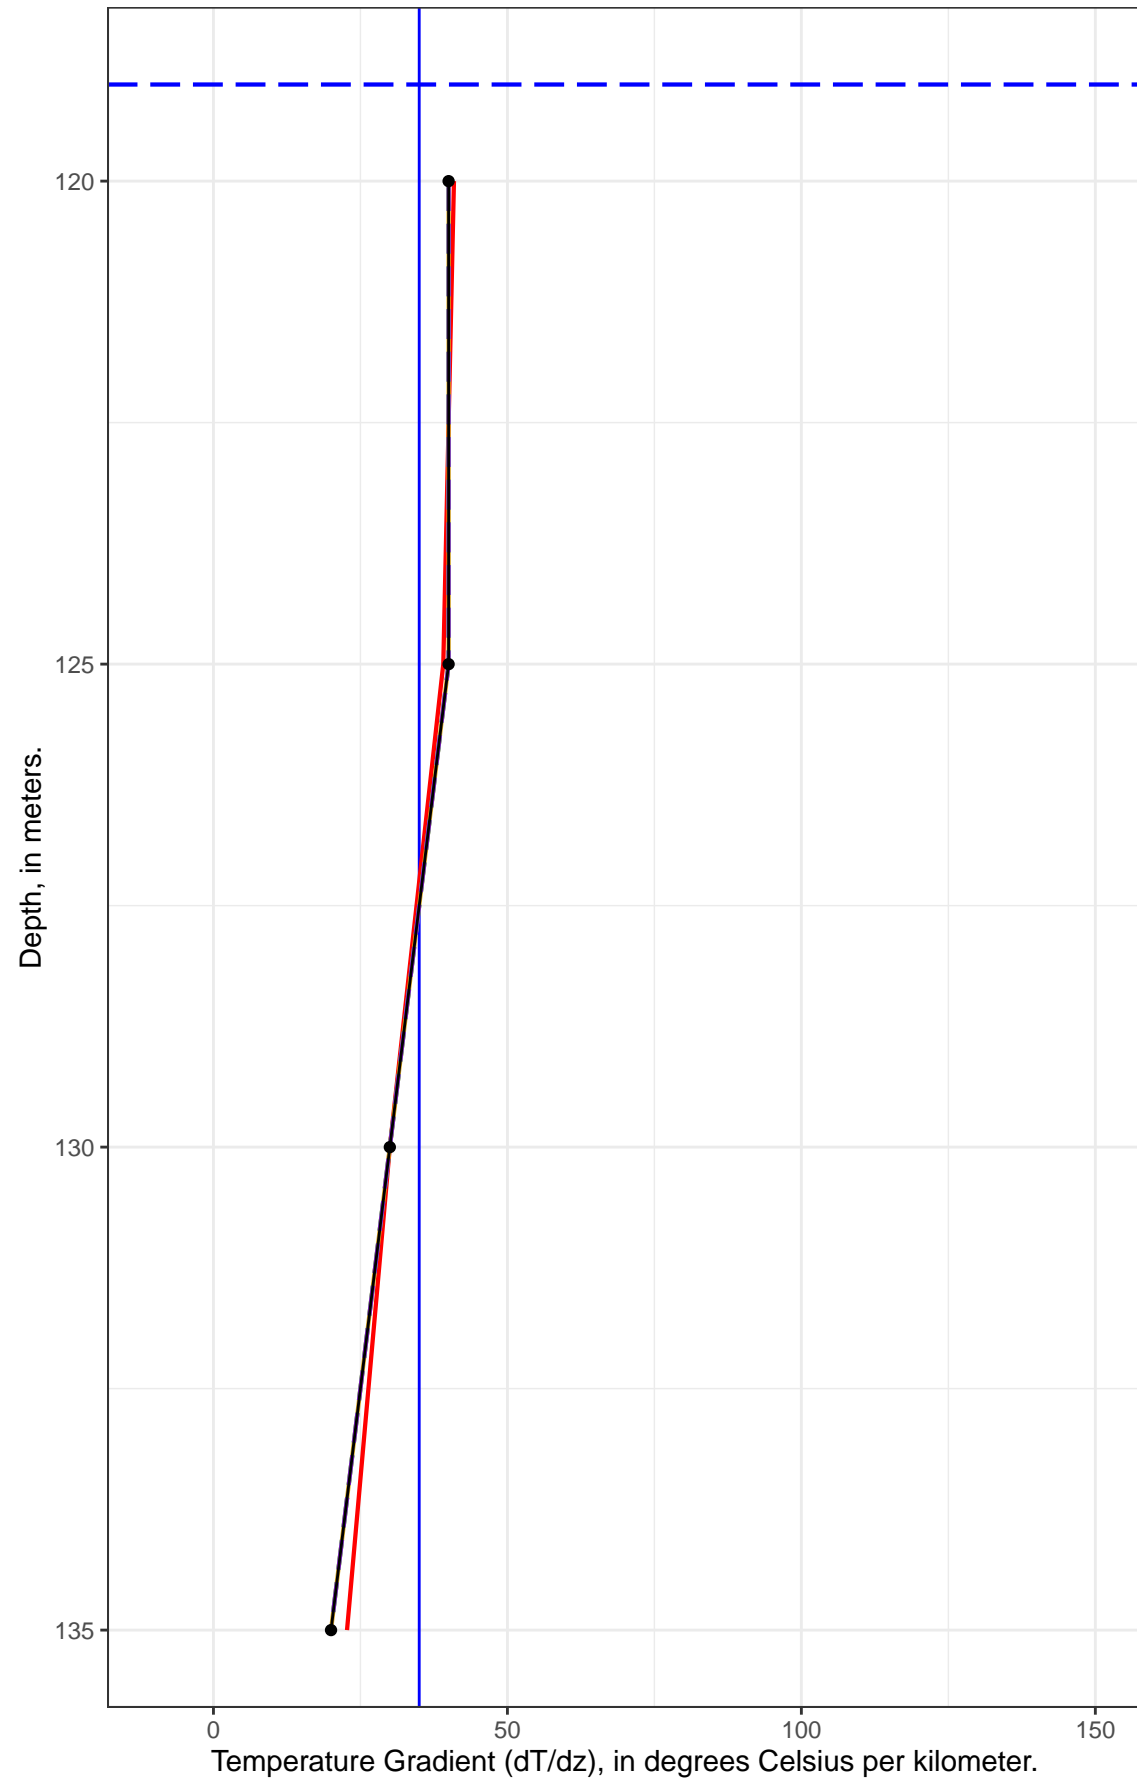

ID: 372 [W\_Well\_East\_of\_Vado] Second Derivative

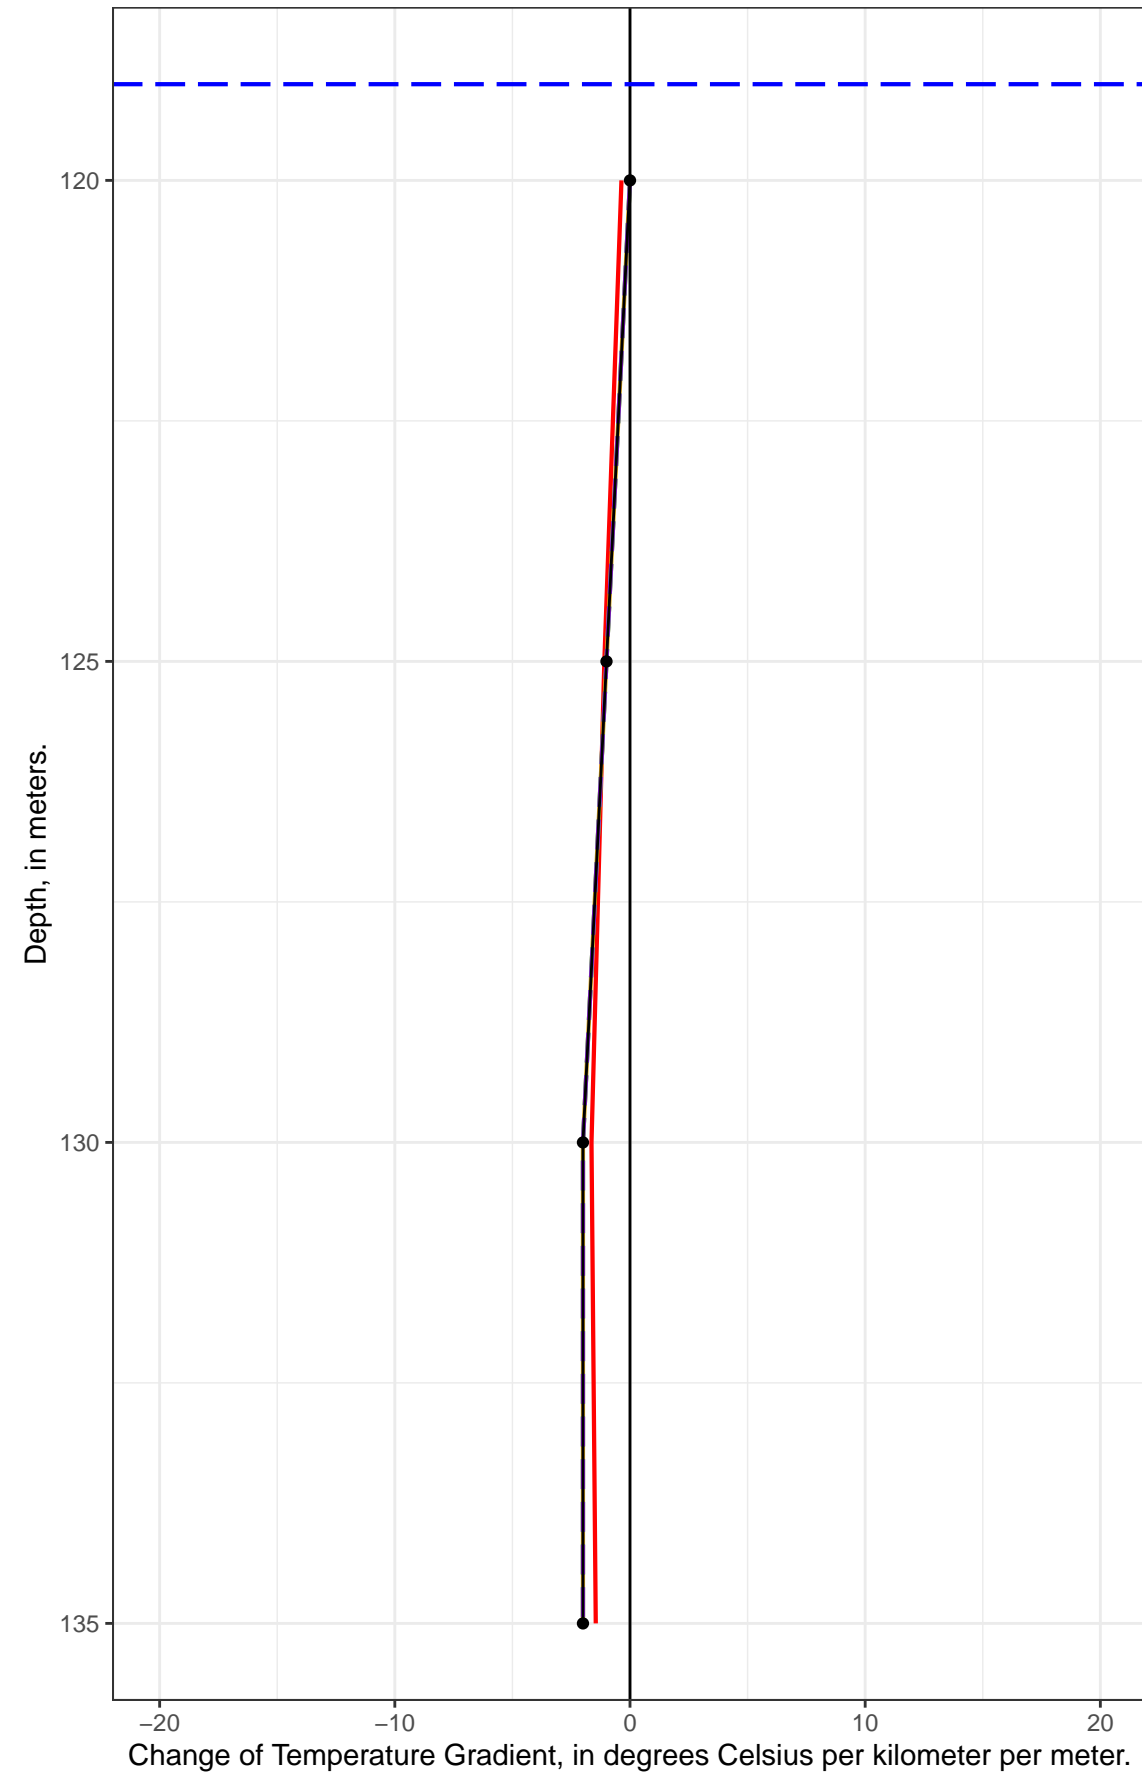

• Data — LOESS (AICC) — LOESS (constant) — LOESS (GCV) — Spline

• Data — LOESS (AICC) — LOESS (constant) — LOESS (GCV) — Spline

• Data — LOESS (AICC) — LOESS (constant) — LOESS (GCV) — Spline



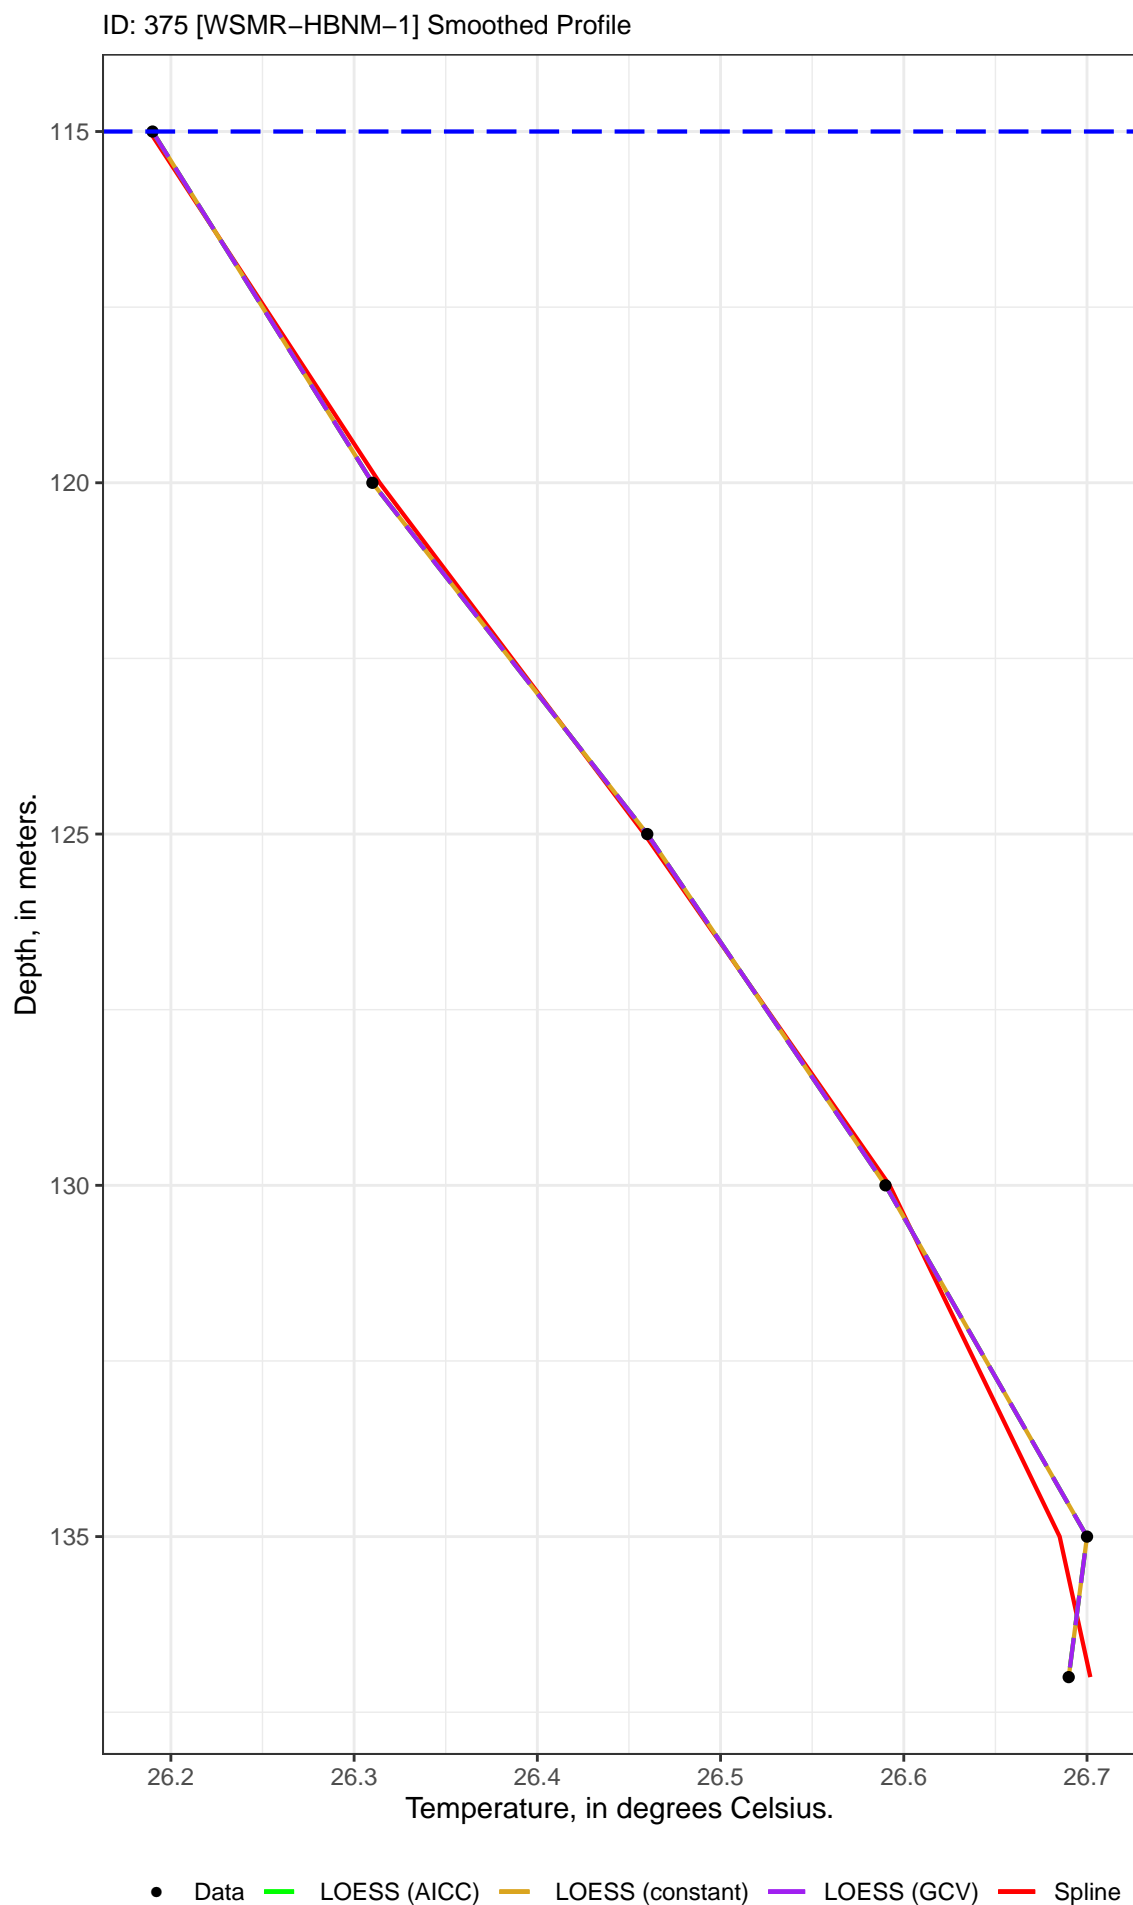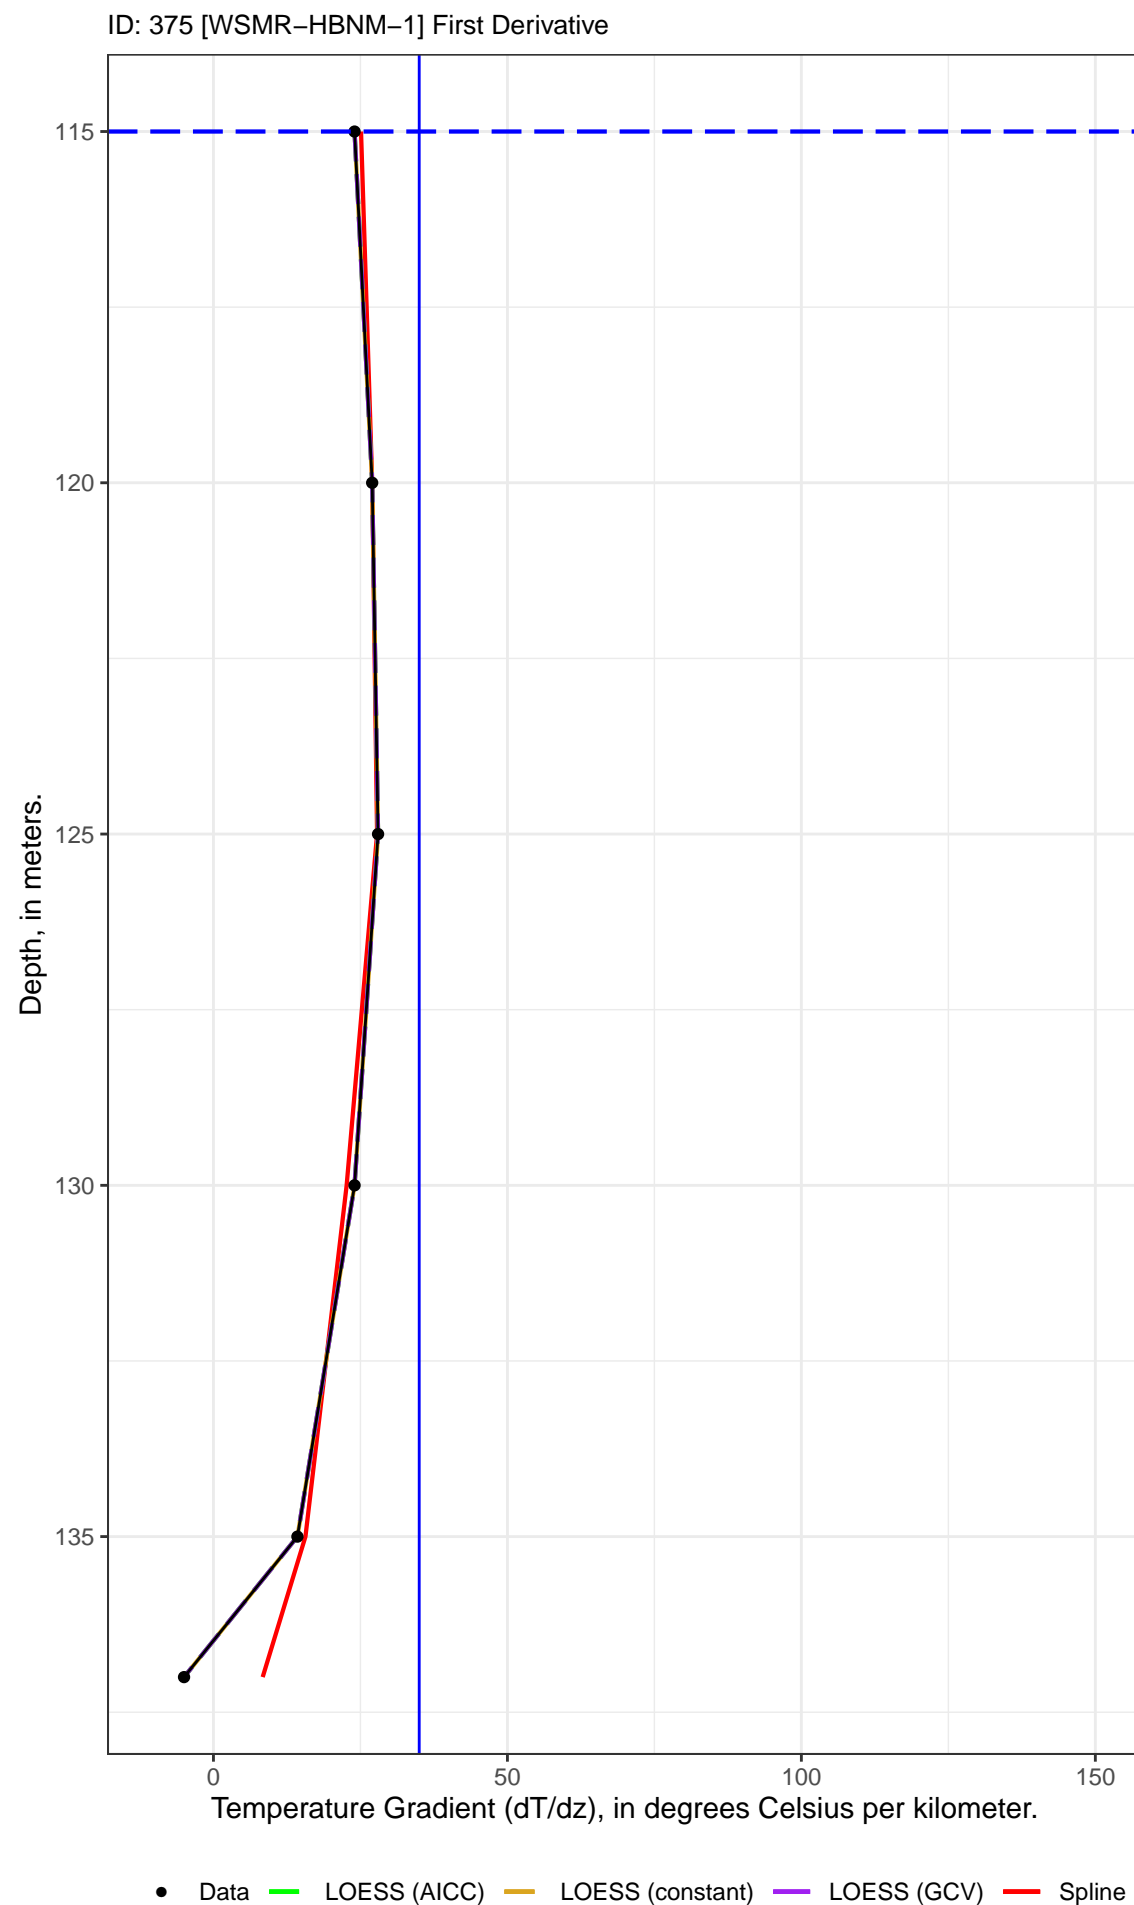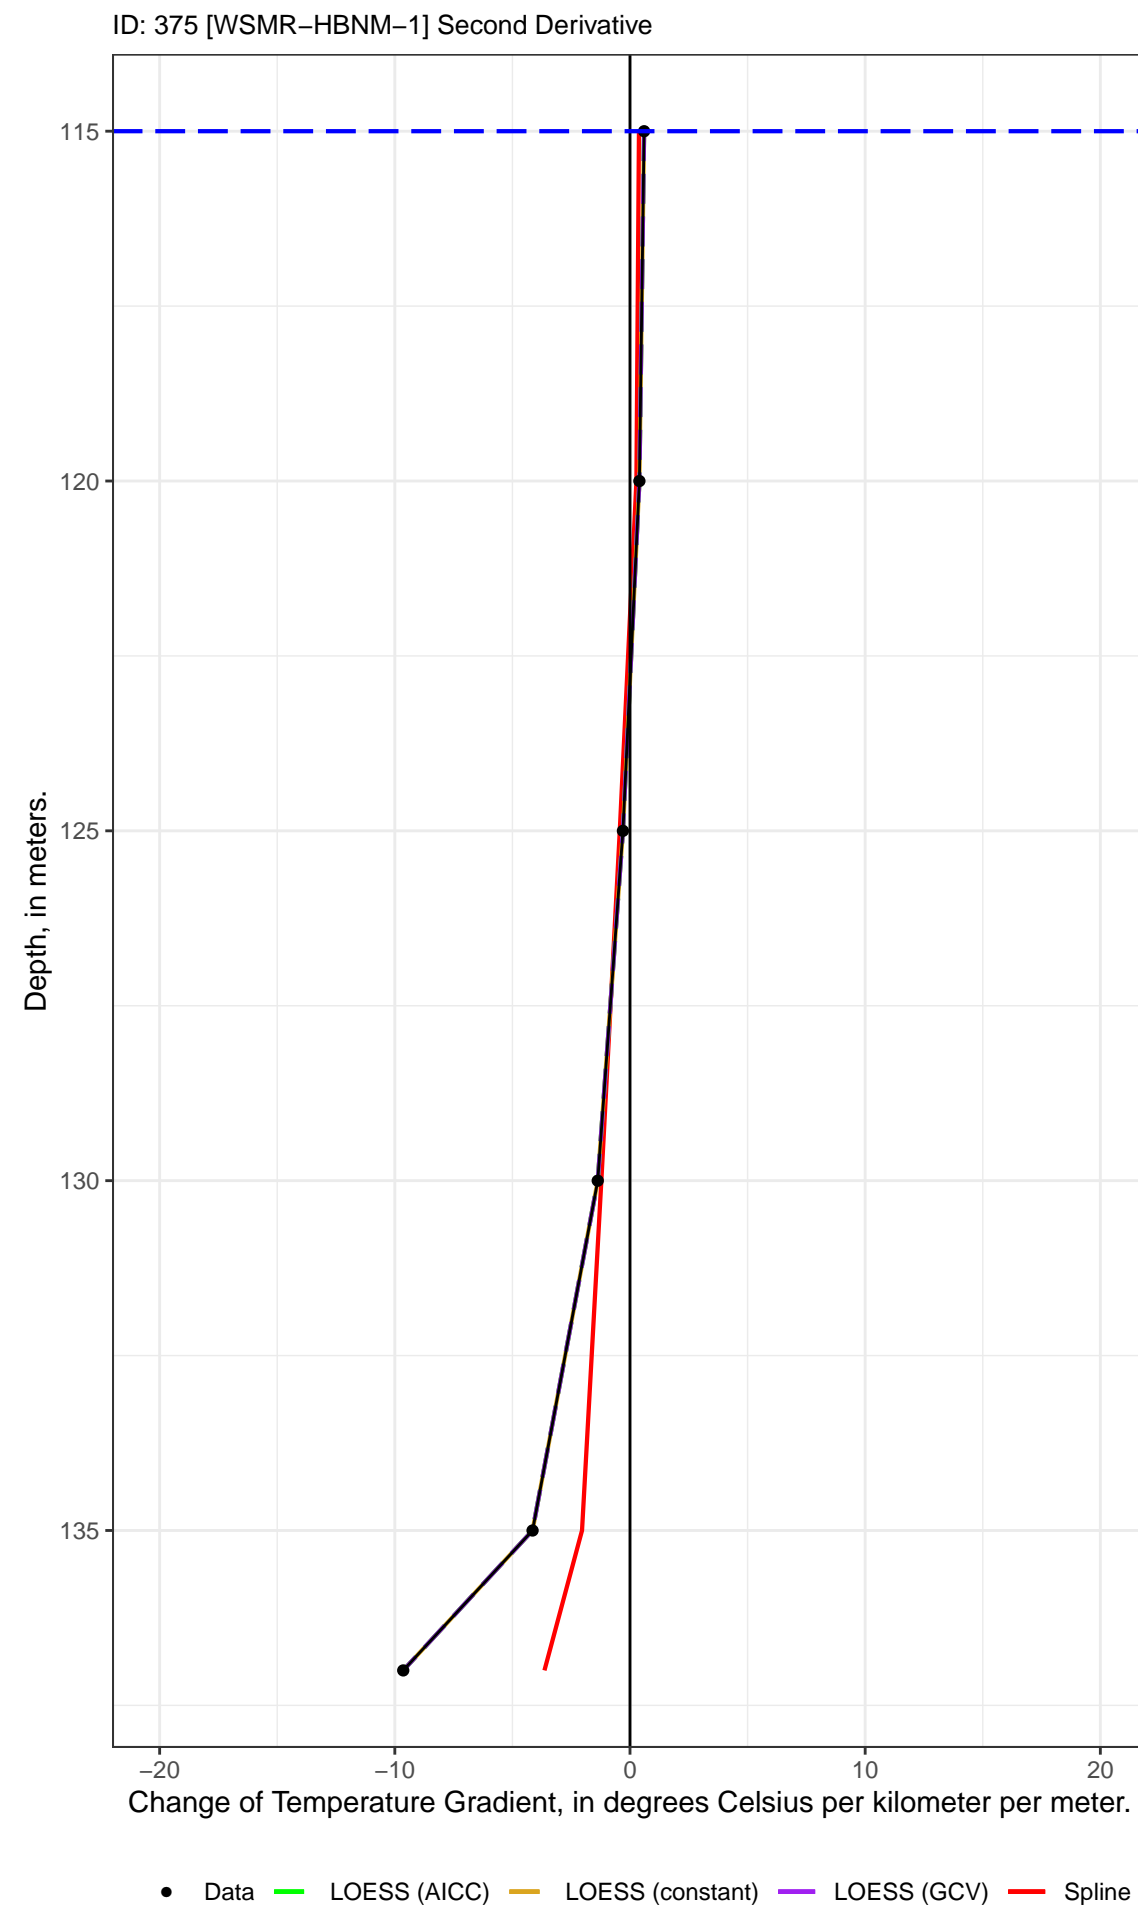

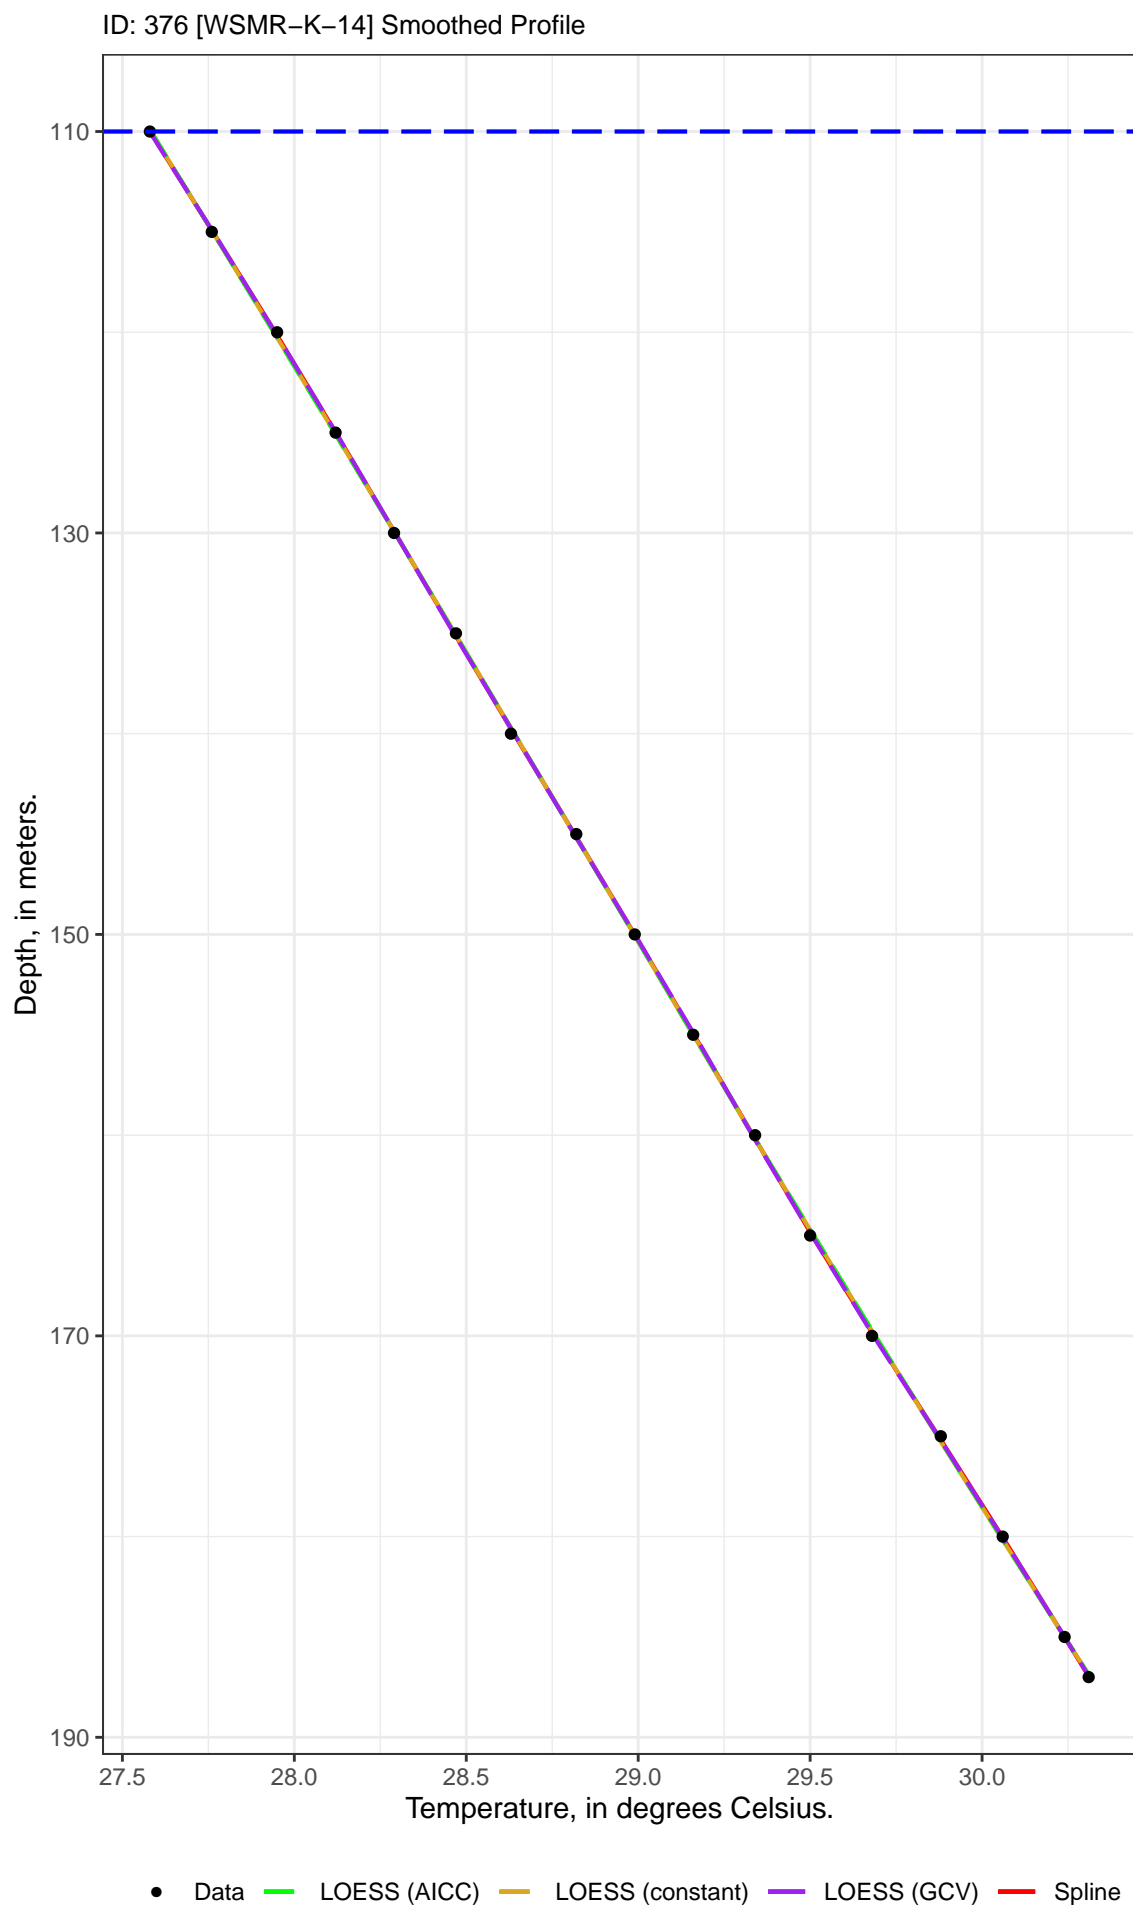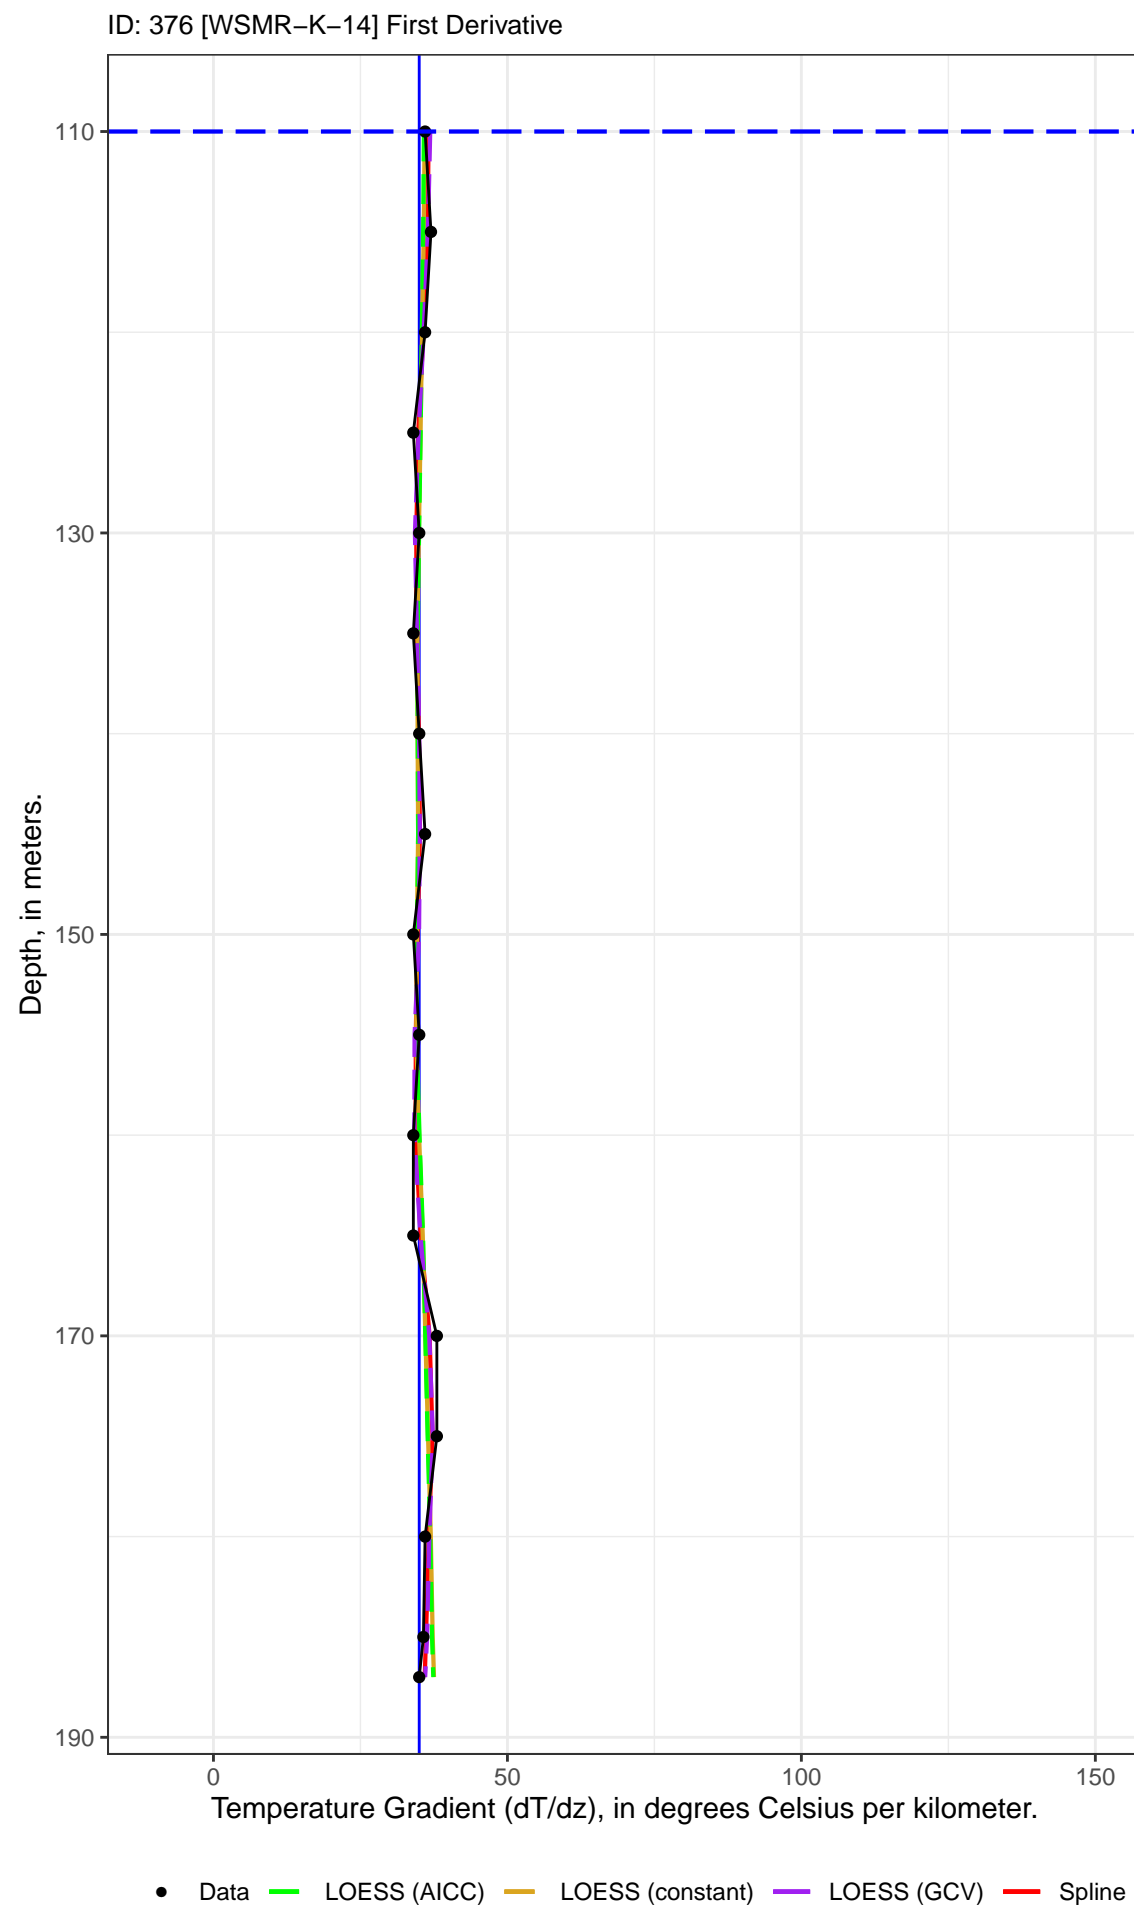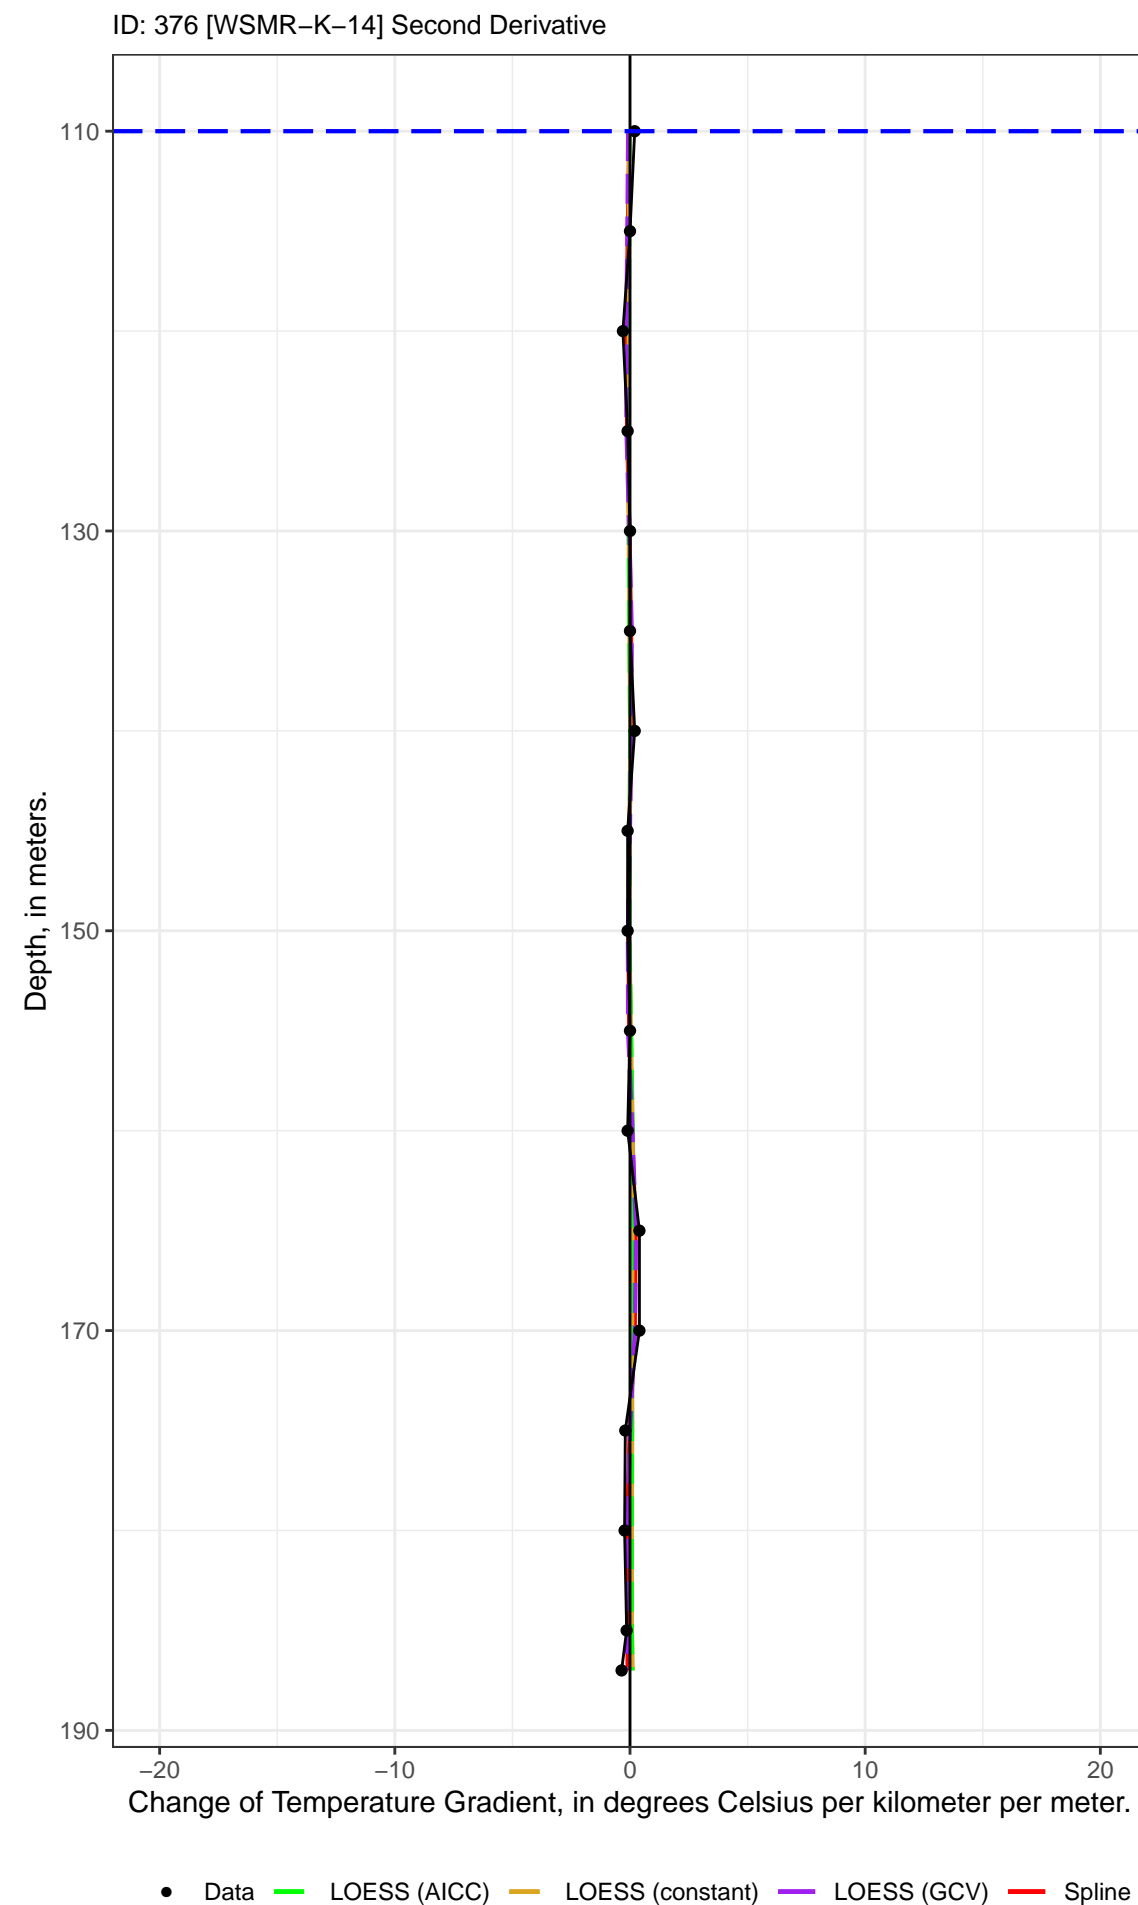

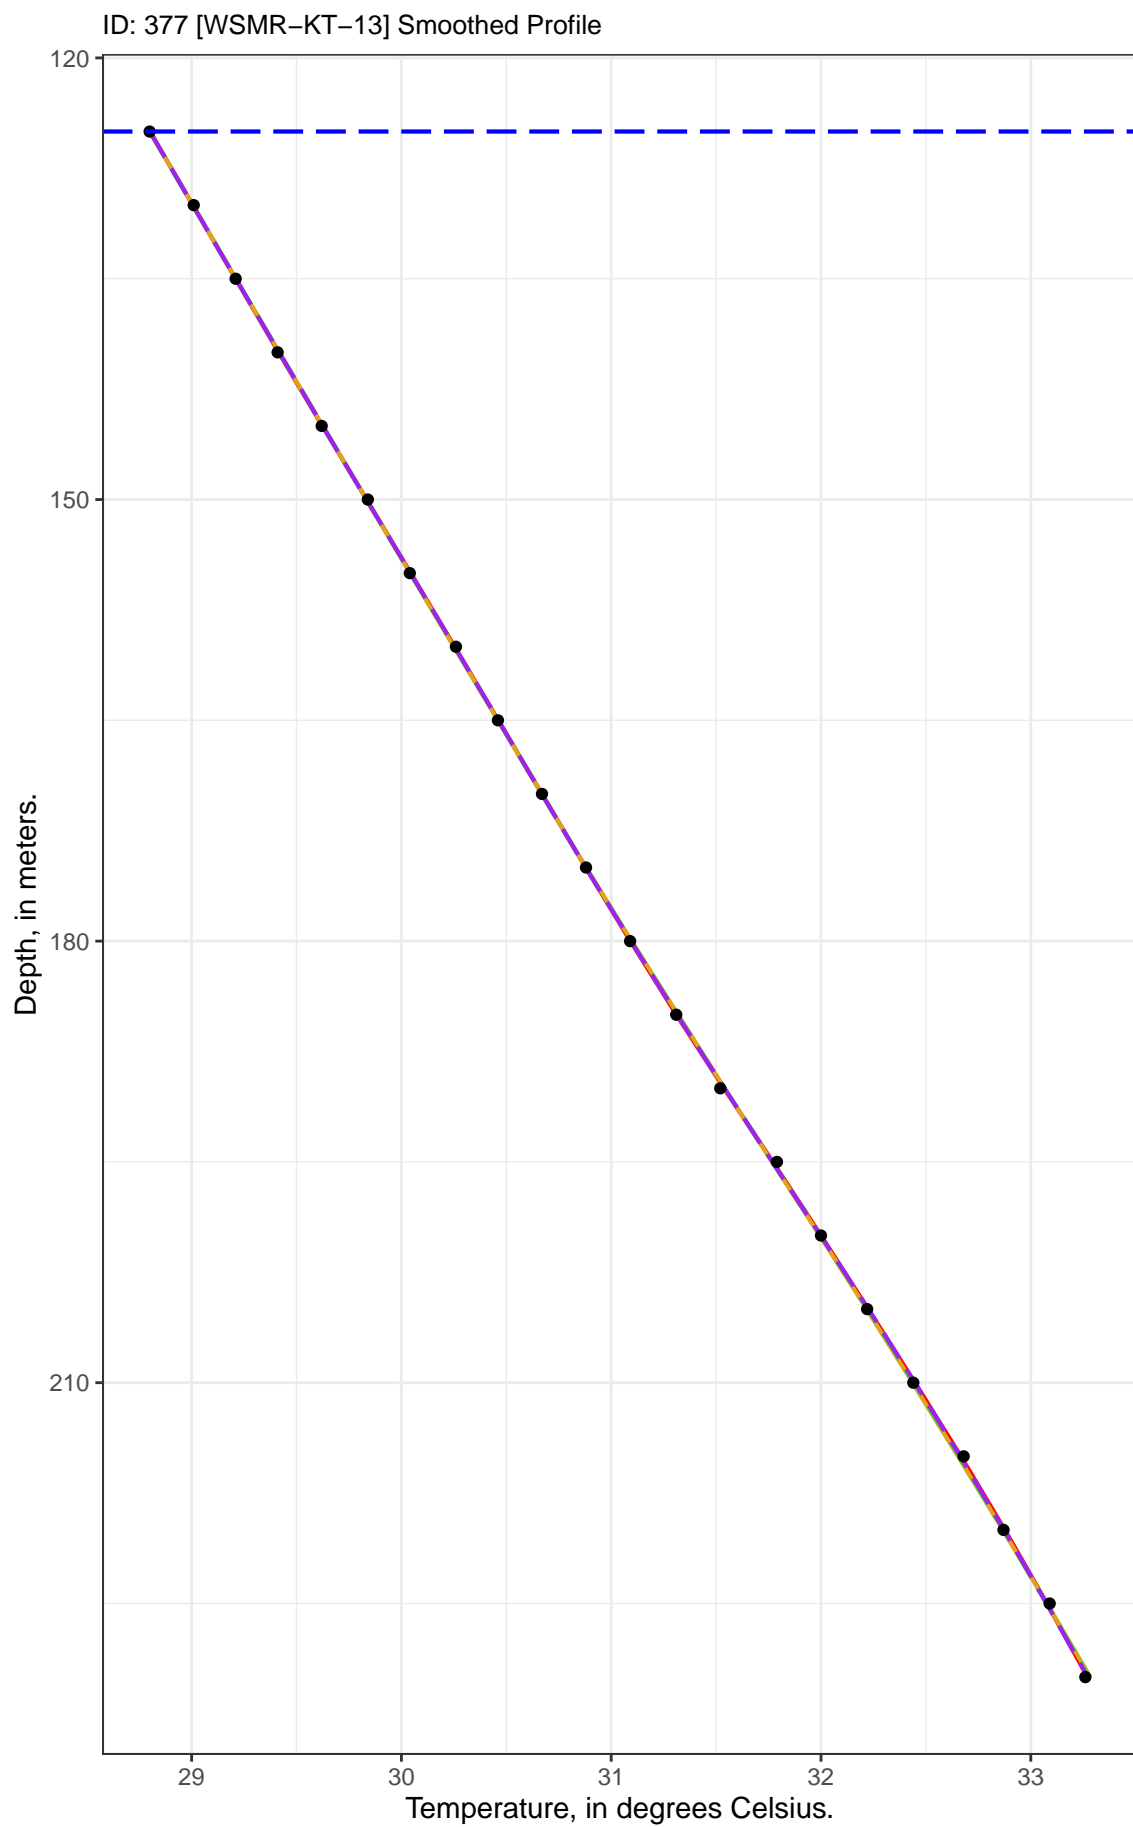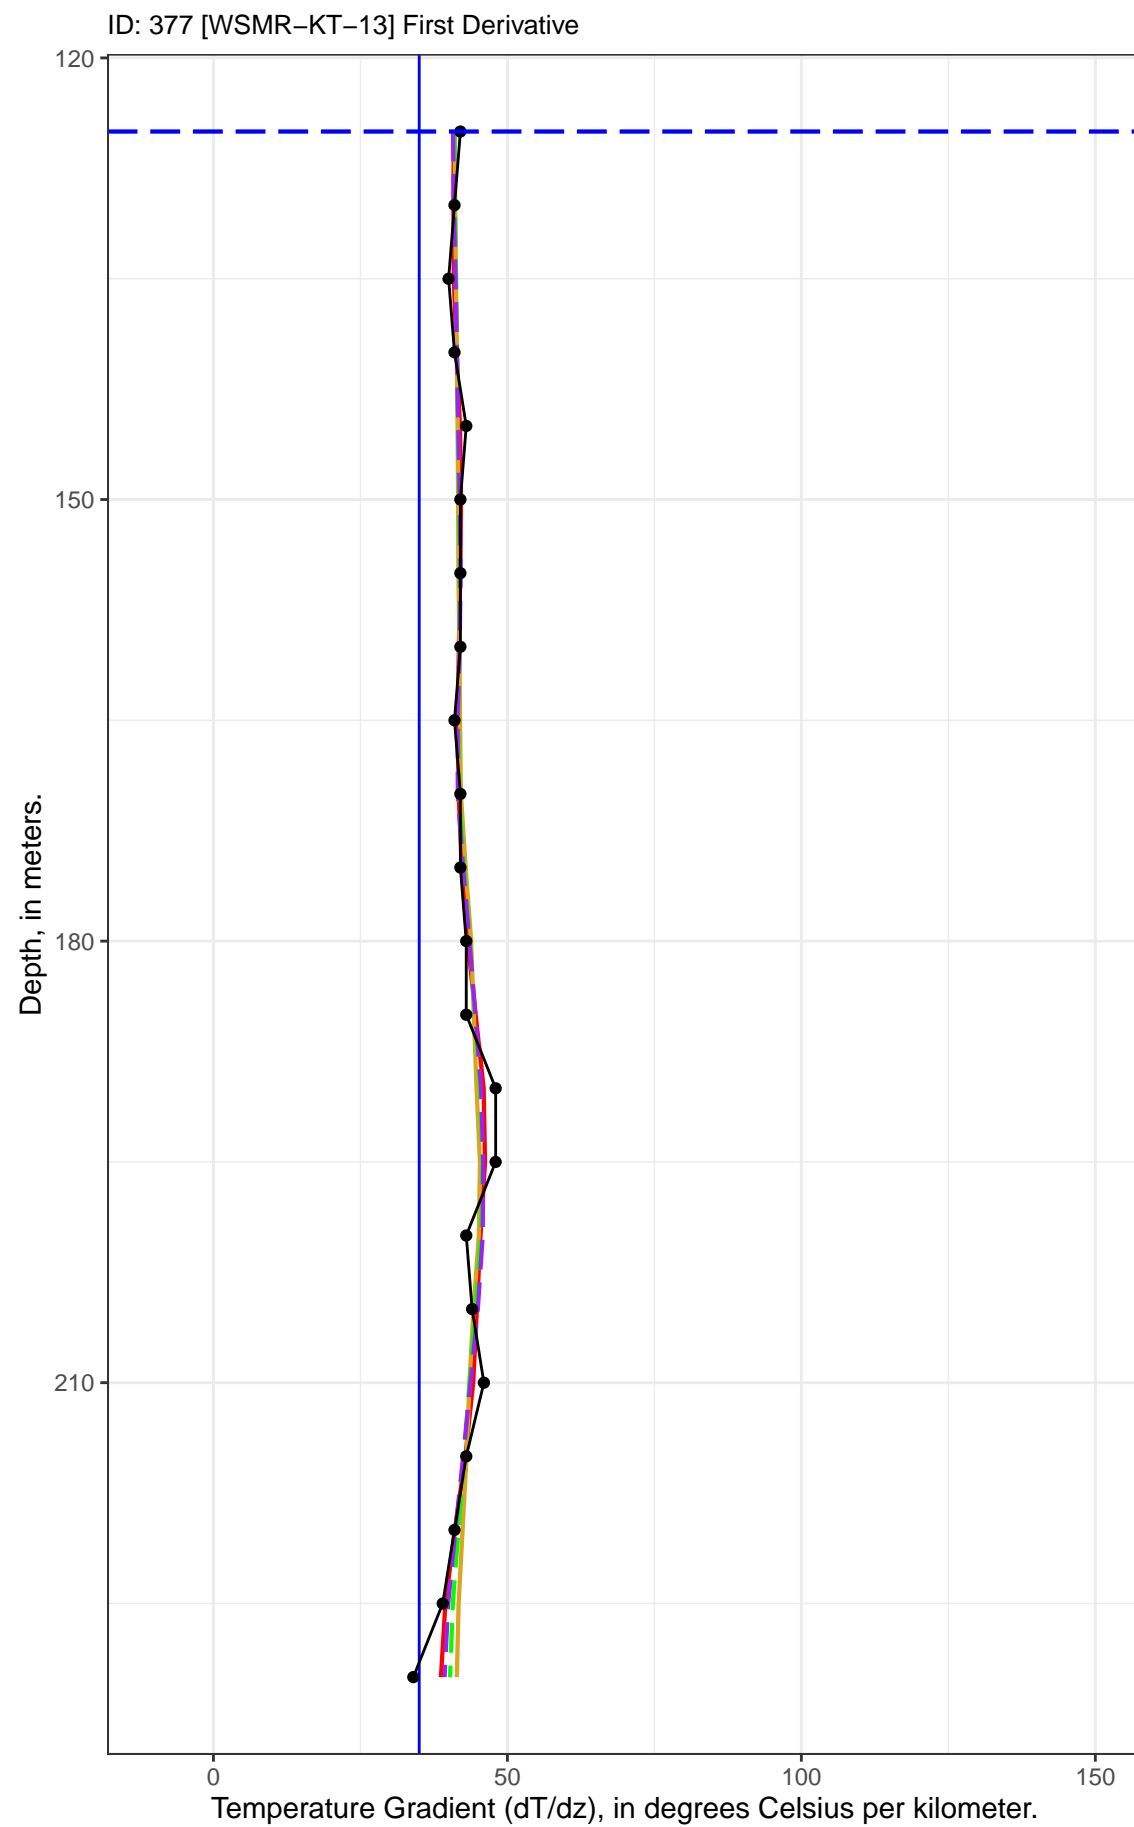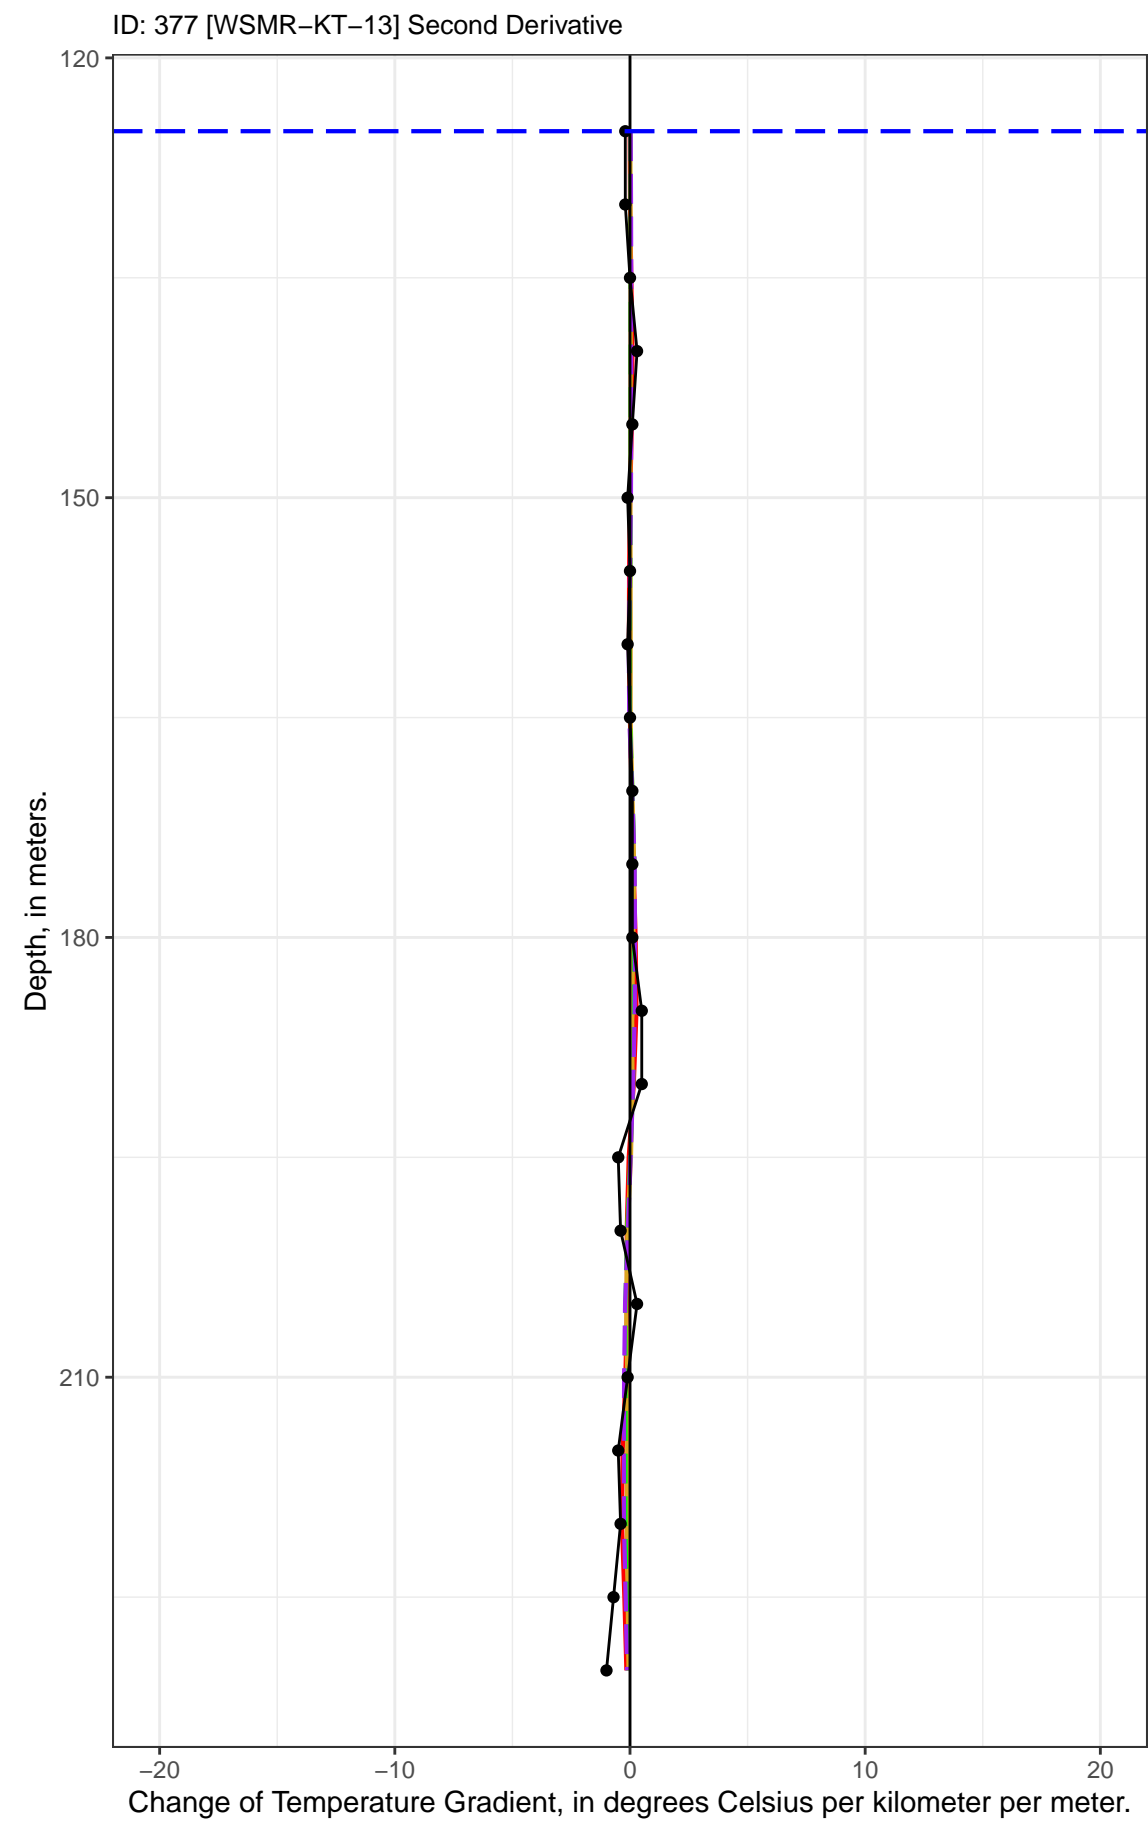

• Data • LOESS (AICC) • LOESS (constant) • LOESS (GCV) • Spline

• Data • LOESS (AICC) • LOESS (constant) • LOESS (GCV) • Spline

• Data • LOESS (AICC) • LOESS (constant) • LOESS (GCV) • Spline
